# Supplementary material
Source: PubMed Central journal article supplement (PMC7418105)
Supplement: jo0c00992_si_002.pdf [file jo0c00992_si_002.pdf]

# 1 Contents

|          |                                                                 |            |
|----------|-----------------------------------------------------------------|------------|
| <b>1</b> | <b>Contents</b>                                                 | <b>1</b>   |
| <b>2</b> | <b>Remarks Regarding the Labelling of the Geometries</b>        | <b>3</b>   |
| <b>3</b> | <b>Catalyst Coordinates</b>                                     | <b>4</b>   |
| <b>4</b> | <b>Uncatalyzed Background Reaction</b>                          | <b>12</b>  |
| 4.1      | Educt Complexes <b>16</b>                                       | 12         |
| 4.2      | Product Complexes <b>17</b>                                     | 14         |
| 4.3      | Transition States for Product Formation                         | 15         |
| <b>5</b> | <b>Preactivation of Catalyst</b>                                | <b>17</b>  |
| 5.1      | Educt Complexes and Intermediates                               | 17         |
| 5.2      | Product Complexes                                               | 25         |
| 5.3      | Transition States                                               | 33         |
| <b>6</b> | <b>Structures of the proposal in the main text of the paper</b> | <b>40</b>  |
| 6.1      | Educt Complexes <b>14</b>                                       | 40         |
| 6.2      | Product Complexes <b>15</b>                                     | 72         |
| 6.3      | Transition States for Product formation                         | 86         |
| <b>7</b> | <b>Other Pathways</b>                                           | <b>102</b> |
| 7.1      | Complexes <b>10, 11, 14</b> and <b>15</b>                       | 102        |
| 7.1.1    | Educt Complexes <b>10</b>                                       | 102        |
| 7.1.2    | Product Complexes <b>11</b>                                     | 110        |
| 7.1.3    | Educt Complexes <b>14</b>                                       | 119        |
| 7.1.4    | Product Complexes <b>15</b>                                     | 162        |
| 7.2      | Pathways from Complexes <b>14</b> to <b>15</b>                  | 210        |
| 7.2.1    | Pathways starting from <b>14d-mi</b>                            | 210        |
| 7.2.1.1  | to <b>15d-mi</b>                                                | 210        |
| 7.2.1.2  | to <b>15r-mi</b>                                                | 221        |
| 7.2.1.3  | to <b>15s-mi</b>                                                | 223        |
| 7.2.1.4  | to <b>15l-mi</b>                                                | 225        |
| 7.2.1.5  | to <b>15a-mi</b>                                                | 227        |
| 7.2.1.6  | to <b>15j-mi</b>                                                | 232        |
| 7.2.2    | Pathways starting from <b>14j-mi</b>                            | 235        |
| 7.2.2.1  | to <b>15d-mi</b>                                                | 235        |
| 7.2.2.2  | to <b>15r-mi</b>                                                | 246        |
| 7.2.2.3  | to <b>15c-mi</b>                                                | 259        |
| 7.2.2.4  | to <b>15s-mi</b>                                                | 260        |
| 7.2.2.5  | to <b>15q-mi</b>                                                | 263        |
| 7.2.2.6  | to <b>15l-mi</b>                                                | 265        |
| 7.2.2.7  | to <b>15a-mi</b>                                                | 266        |
| 7.2.2.8  | to <b>15j-mi</b>                                                | 272        |
| 7.2.2.9  | to <b>15o-mi</b>                                                | 274        |
| 7.2.3    | Pathways starting from <b>14j-ma</b>                            | 277        |
| 7.2.3.1  | to <b>15r-ma</b> and <b>15r-2-ma</b>                            | 277        |
| 7.2.3.2  | to <b>15d-ma</b> and <b>15d-2-ma</b>                            | 291        |
| 7.2.3.3  | to <b>15n-ma</b>                                                | 311        |
| 7.2.3.4  | to <b>15q-ma</b>                                                | 313        |
| 7.2.3.5  | to <b>15j-ma</b>                                                | 316        |
| 7.2.3.6  | to <b>15o-ma</b>                                                | 318        |

|          |                                                      |     |
|----------|------------------------------------------------------|-----|
| 7.2.3.7  | to <b>15c-ma</b>                                     | 320 |
| 7.2.3.8  | to <b>15p-ma</b>                                     | 326 |
| 7.2.3.9  | to <b>15b-ma</b>                                     | 330 |
| 7.2.3.10 | to <b>15l-ma</b>                                     | 336 |
| 7.2.4    | Pathways starting from <b>14d-ma</b>                 | 341 |
| 7.2.4.1  | to <b>15r-ma</b> and <b>15r-2-ma</b>                 | 341 |
| 7.2.4.2  | to <b>15d-ma</b> and <b>15d-2-ma</b>                 | 350 |
| 7.2.4.3  | to <b>15n-ma</b>                                     | 353 |
| 7.2.4.4  | to <b>15j-ma</b>                                     | 355 |
| 7.2.4.5  | to <b>15o-ma</b>                                     | 357 |
| 7.2.4.6  | to <b>15c-ma</b>                                     | 364 |
| 7.2.4.7  | to <b>15p-ma</b>                                     | 370 |
| 7.2.4.8  | to <b>15b-ma</b>                                     | 382 |
| 7.2.4.9  | to <b>15l-ma</b>                                     | 388 |
| 7.3      | Complexes <b>13</b>                                  | 389 |
| 7.4      | Agglomeration to Complexes <b>13</b>                 | 399 |
| 7.4.1    | Pathways starting from <b>13j-ma</b>                 | 399 |
| 7.4.2    | Pathways starting from <b>13d-ma</b>                 | 417 |
| 7.4.3    | Pathways starting from <b>13d-mi</b>                 | 434 |
| 7.5      | Interconversion of Complexes <b>13</b>               | 452 |
| 7.5.1    | Pathway <b>13d-ma</b> ↔ <b>13d-mi</b>                | 452 |
| 7.5.2    | Pathway <b>13j-ma</b> ↔ <b>13d-ma</b>                | 458 |
| 7.5.3    | Pathway <b>13j-ma</b> ↔ <b>13d-mi</b>                | 464 |
| 7.6      | Complexes <b>12</b>                                  | 466 |
| 7.7      | Agglomeration to Complexes <b>12</b>                 | 474 |
| 7.7.1    | Pathway <b>12d-ma</b> → <b>14d-ma</b>                | 474 |
| 7.7.2    | Pathway <b>12d-mi</b> → <b>14d-mi</b>                | 477 |
| 7.7.3    | Pathway <b>12j-ma</b> → <b>14j-ma</b>                | 479 |
| 7.7.4    | Pathway <b>12j-mi</b> → <b>14j-mi</b>                | 481 |
| 7.8      | Interconversion of Complexes <b>14</b> - Mechanism 1 | 483 |
| 7.8.1    | Pathway <b>14j-ma</b> ↔ <b>14d-ma</b>                | 483 |
| 7.8.2    | Pathway <b>14j-ma</b> ↔ <b>14j-mi</b>                | 485 |
| 7.8.3    | Pathway <b>14j-ma</b> ↔ <b>14d-mi</b>                | 492 |
| 7.8.4    | Pathway <b>14j-mi</b> ↔ <b>14d-mi</b>                | 499 |
| 7.8.5    | Pathway <b>14d-ma</b> ↔ <b>14j-mi</b>                | 501 |
| 7.8.6    | Pathway <b>14d-ma</b> ↔ <b>14d-mi</b>                | 512 |
| 7.9      | Interconversion of Complexes <b>14</b> - Mechanism 2 | 515 |
| 7.9.1    | Pathway <b>14j-ma</b> ↔ <b>14j-mi</b>                | 515 |
| 7.9.2    | Pathway <b>14j-ma</b> ↔ <b>14d-mi</b>                | 526 |
| 7.9.3    | Pathway <b>14d-ma</b> ↔ <b>14j-mi</b>                | 533 |
| 7.9.4    | Pathway <b>14d-ma</b> ↔ <b>14d-mi</b>                | 562 |
| 7.10     | Interconversion of Complexes <b>14</b> - Mechanism 3 | 569 |
| 7.10.1   | Pathway <b>14j-ma</b> ↔ <b>14d-mi</b>                | 569 |
| 7.10.2   | Pathway <b>14d-ma</b> ↔ <b>14j-mi</b>                | 584 |
| 7.10.3   | Pathway <b>14d-ma</b> ↔ <b>14d-mi</b>                | 596 |



## 2 Remarks Regarding the Labelling of the Geometries

All geometries included in this file were optimized with RI-PBE-D3/def2-SVP. The general labelling follows the one used in the supporting information.

“COSMO” indicates a geometry which was optimized by including the COSMO solvation model. “Woelfling data” indicates that the corresponding transition state has not been fully optimized, but was obtained from TURBOMOLE’s woelfling-program. Energies given are the RI-PBE-D3/def2-SVP(+COSMO) energies.

For gas-phase optimized transition state geometries, we also give the number of remaining imaginary frequencies. These are not stated for the COSMO-optimized geometries, as TURBOMOLE currently does not allow the calculation of vibrational frequencies in an analytical way when the COSMO model is utilized.

### 3 Catalyst Coordinates

(*S*)-TRIP; COSMO

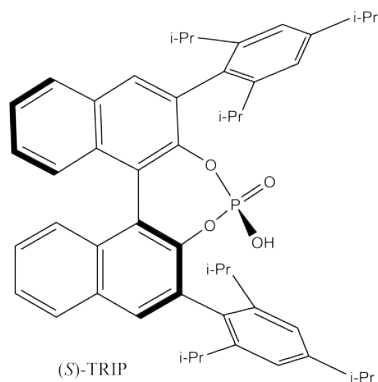

Energy (Hartree) = -2577.437910017

|   |            |            |            |
|---|------------|------------|------------|
| C | 0.0061045  | 0.9069814  | 29.2593269 |
| C | 0.8007478  | -0.1820442 | 29.6247352 |
| C | 0.3411892  | -1.0192079 | 30.7078899 |
| C | 1.1357169  | -2.0589155 | 31.2782417 |
| C | -0.9683999 | -0.7772474 | 31.2667865 |
| C | -1.4500884 | -1.6261485 | 32.3085941 |
| C | -1.7344531 | 0.3375326  | 30.8182917 |
| H | -2.7159109 | 0.5232272  | 31.2797280 |
| C | -1.2489517 | 1.2257647  | 29.8662652 |
| C | 4.3486320  | 0.4685250  | 28.2982481 |
| C | 4.7006741  | -0.7938779 | 27.8355390 |
| H | 5.7170652  | -0.9580229 | 27.4462118 |
| C | 3.7714764  | -1.8724933 | 27.8112583 |
| C | 4.1221818  | -3.1360455 | 27.2468454 |
| C | 2.4417119  | -1.6791266 | 28.3381529 |
| C | 1.5043296  | -2.7489045 | 28.2131444 |
| C | 2.1009402  | -0.4087798 | 28.9334003 |
| C | 3.0355472  | 0.6306850  | 28.8357399 |
| O | 0.4325147  | 1.7291017  | 28.2207962 |
| O | 2.7166794  | 1.8948637  | 29.3366198 |
| P | 1.6391626  | 2.8097977  | 28.5042828 |
| O | 1.1805589  | 3.7313407  | 29.7546710 |
| H | 0.5003423  | 4.3820702  | 29.4773011 |
| O | 2.0362357  | 3.4861755  | 27.2400365 |
| C | -0.6645947 | -2.6505750 | 32.8153811 |
| C | 0.6454650  | -2.8539898 | 32.3055058 |
| H | -2.4557979 | -1.4377293 | 32.7162892 |
| H | -1.0456815 | -3.2934683 | 33.6234033 |
| H | 2.1543019  | -2.2239187 | 30.9010736 |
| H | 1.2809960  | -3.6454739 | 32.7312687 |
| C | 1.8710606  | -3.9595099 | 27.6412570 |
| C | 3.1947342  | -4.1639108 | 27.1672897 |
| H | 0.4738866  | -2.6025965 | 28.5656457 |
| H | 1.1269562  | -4.7654123 | 27.5493028 |
| H | 3.4758968  | -5.1310210 | 26.7233283 |
| H | 5.1442271  | -3.2721861 | 26.8597537 |
| C | -1.9476892 | 3.5690115  | 30.5014590 |
| C | -1.9120634 | 2.5246363  | 29.5284986 |
| C | -2.4689184 | 4.8229779  | 30.1229020 |
| C | -2.4178770 | 2.7574707  | 28.2182930 |
| C | -2.9362331 | 4.0251381  | 27.9011226 |
| C | -2.9620484 | 5.0783633  | 28.8319945 |
| H | -2.4964843 | 5.6372357  | 30.8647793 |
| C | -2.4575577 | 1.6580429  | 27.1591908 |
| H | -3.3283168 | 4.1963350  | 26.8860331 |
| C | -1.7778049 | 2.0814015  | 25.8454587 |

|   |            |           |            |
|---|------------|-----------|------------|
| H | -1.7398349 | 1.2274171 | 25.1382968 |
| H | -0.7407921 | 2.4256044 | 26.0261345 |
| H | -2.3324133 | 2.9002610 | 25.3413679 |
| C | -3.9066631 | 1.1899490 | 26.9241827 |
| H | -1.8983571 | 0.7862721 | 27.5547098 |
| H | -3.9362678 | 0.3573819 | 26.1910856 |
| H | -4.5354934 | 2.0136428 | 26.5254948 |
| H | -4.3735880 | 0.8362130 | 27.8659196 |
| C | -3.4990099 | 6.4532318 | 28.4557915 |
| C | -2.6366393 | 7.1124568 | 27.3636994 |
| H | -1.5751897 | 7.1848456 | 27.6761506 |
| H | -2.9998548 | 8.1362874 | 27.1375945 |
| H | -2.6691599 | 6.5289618 | 26.4198331 |
| C | -4.9803985 | 6.3951101 | 28.0419343 |
| H | -3.4294866 | 7.0866531 | 29.3674642 |
| H | -5.1186882 | 5.7881879 | 27.1227441 |
| H | -5.3701807 | 7.4122741 | 27.8307734 |
| H | -5.6051475 | 5.9448899 | 28.8395837 |
| C | -1.4794050 | 3.3697940 | 31.9448446 |
| C | -0.6074912 | 4.5172400 | 32.4837931 |
| H | -0.2597269 | 4.2763231 | 33.5091404 |
| H | -1.1642787 | 5.4749919 | 32.5480123 |
| H | 0.2904844  | 4.6757788 | 31.8562603 |
| C | -2.6934117 | 3.1415440 | 32.8685151 |
| H | -0.8563777 | 2.4532434 | 31.9716964 |
| H | -3.3202834 | 2.2943284 | 32.5260043 |
| H | -3.3420725 | 4.0423169 | 32.8948053 |
| H | -2.3643740 | 2.9281393 | 33.9066060 |
| H | 8.1740690  | 5.2685019 | 27.0113990 |
| H | 7.6634214  | 1.5939834 | 31.5983730 |
| H | 6.8113748  | 1.6144601 | 24.5511836 |
| C | 8.0899486  | 4.9745298 | 28.0808221 |
| H | 4.0409429  | 2.9026132 | 31.3467561 |
| H | 6.5612131  | 6.5031126 | 28.4861537 |
| H | 3.5971563  | 3.5009452 | 25.4943678 |
| C | 7.1142810  | 3.8056029 | 28.1407205 |
| C | 6.8800024  | 0.8333693 | 31.3977278 |
| C | 7.5591385  | 6.1936482 | 28.8569115 |
| H | 8.2487509  | 7.0574514 | 28.7568199 |
| C | 6.7970303  | 3.1833732 | 29.3618500 |
| C | 5.9457565  | 0.9828930 | 24.8425473 |
| H | 9.4831998  | 4.2774729 | 29.6344225 |
| C | 6.4937373  | 3.3225242 | 26.9775558 |
| C | 9.4947165  | 4.5710844 | 28.5637538 |
| H | 9.8892340  | 3.7120491 | 27.9842598 |
| H | 6.7263373  | 3.8093207 | 26.0165322 |
| C | 4.9707282  | 2.4787592 | 31.7740924 |
| H | 6.6498255  | 0.3284242 | 32.3588378 |
| H | 7.3125862  | 0.0801216 | 30.7081643 |
| C | 5.8976315  | 2.1061155 | 29.4400282 |
| C | 4.3344836  | 2.9471214 | 24.8826681 |
| C | 5.5805123  | 2.2503310 | 26.9987427 |
| H | 5.4683484  | 0.6117928 | 23.9118722 |
| H | 6.3439852  | 0.1080118 | 25.3951493 |
| C | 5.6129271  | 1.4732572 | 30.8011058 |
| C | 5.2934337  | 1.6282334 | 28.2443770 |
| C | 4.9410280  | 1.7863877 | 25.6901828 |
| H | 5.6598731  | 3.3181847 | 32.0041702 |
| H | 5.1110680  | 3.6558856 | 24.5267675 |
| H | 4.7157429  | 1.9840003 | 32.7343097 |
| H | 7.4602213  | 5.9681366 | 29.9395677 |
| H | 3.8147878  | 2.5540228 | 23.9842833 |
| H | 10.2069598 | 5.4155366 | 28.4574745 |
| H | 4.8818194  | 0.6533919 | 30.6471834 |
| H | 4.1039876  | 1.1071604 | 25.9529378 |
| H | 7.2675234  | 3.5482922 | 30.2892635 |

(S)-TRIP

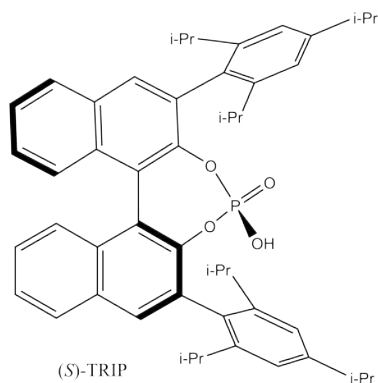

Energy (Hartree) = -2577.42980613

|   |            |            |             |
|---|------------|------------|-------------|
| C | -0.0043875 | 0.8912558  | 29.2473999  |
| C | 0.7949085  | -0.1931295 | 29.6167541  |
| C | 0.3400753  | -1.0269239 | 30.7044798  |
| C | 1.1382927  | -2.0628222 | 31.2761055  |
| C | -0.9684370 | -0.7866748 | 31.2665653  |
| C | -1.4445924 | -1.6339327 | 32.31115576 |
| C | -1.7369234 | 0.3263781  | 30.8185001  |
| H | -2.7154894 | 0.5150781  | 31.2849844  |
| C | -1.2561695 | 1.2110330  | 29.8613963  |
| C | 4.3401277  | 0.4740676  | 28.2931262  |
| C | 4.7002393  | -0.7880578 | 27.8367162  |
| H | 5.7194029  | -0.9464020 | 27.4523676  |
| C | 3.7782586  | -1.8725550 | 27.8139334  |
| C | 4.1371493  | -3.1361083 | 27.2559725  |
| C | 2.4467136  | -1.6855546 | 28.3380006  |
| C | 1.5170613  | -2.7622149 | 28.2171004  |
| C | 2.0965913  | -0.4148759 | 28.9264511  |
| C | 3.0241006  | 0.6311982  | 28.8253330  |
| O | 0.4103738  | 1.7058688  | 28.2012632  |
| O | 2.6940526  | 1.8949358  | 29.3168133  |
| P | 1.6182758  | 2.7948418  | 28.4621590  |
| O | 1.1483801  | 3.7362046  | 29.6963190  |
| H | 0.3784693  | 4.2887215  | 29.4396337  |
| O | 2.0184098  | 3.4443103  | 27.1873067  |
| C | -0.6560802 | -2.6551463 | 32.8186886  |
| C | 0.6525205  | -2.8564974 | 32.3059685  |
| H | -2.4494774 | -1.4464120 | 32.7217591  |
| H | -1.0337909 | -3.2968035 | 33.6292004  |
| H | 2.1558934  | -2.2256405 | 30.8957431  |
| H | 1.2910930  | -3.6454944 | 32.7316638  |
| C | 1.8925052  | -3.9728529 | 27.6520196  |
| C | 3.2173651  | -4.1704471 | 27.1802721  |
| H | 0.4856873  | -2.6200937 | 28.5683926  |
| H | 1.1539134  | -4.7841396 | 27.5635113  |
| H | 3.5056923  | -5.1375038 | 26.7409344  |
| H | 5.1603772  | -3.2668604 | 26.8701580  |
| C | -1.9233246 | 3.5632402  | 30.4947028  |
| C | -1.9127452 | 2.5138548  | 29.5261180  |
| C | -2.4243946 | 4.8247223  | 30.1133894  |
| C | -2.4250489 | 2.7492005  | 28.2191913  |
| C | -2.9244421 | 4.0238771  | 27.9004462  |
| C | -2.9236204 | 5.0822621  | 28.8252370  |
| H | -2.4317780 | 5.6426502  | 30.8516204  |
| C | -2.4881047 | 1.6459709  | 27.1655893  |
| H | -3.3203979 | 4.1966910  | 26.8872392  |
| C | -1.8164118 | 2.0542638  | 25.8431604  |
| H | -1.7953440 | 1.1960598  | 25.1406224  |
| H | -0.7736285 | 2.3870122  | 26.0103895  |
| H | -2.3665206 | 2.8758763  | 25.3385866  |

|   |            |           |            |
|---|------------|-----------|------------|
| C | -3.9452006 | 1.1943211 | 26.9492769 |
| H | -1.9346633 | 0.7703220 | 27.5606103 |
| H | -3.9937279 | 0.3594148 | 26.2199889 |
| H | -4.5692290 | 2.0234712 | 26.5545677 |
| H | -4.4060390 | 0.8504292 | 27.8974415 |
| C | -3.4389100 | 6.4645247 | 28.4459536 |
| C | -2.5774708 | 7.1015476 | 27.3402708 |
| H | -1.5113352 | 7.1569137 | 27.6393238 |
| H | -2.9242899 | 8.1302219 | 27.1108798 |
| H | -2.6298745 | 6.5131675 | 26.4005474 |
| C | -4.9259238 | 6.4310744 | 28.0504407 |
| H | -3.3473733 | 7.1022349 | 29.3528908 |
| H | -5.0865468 | 5.8211651 | 27.1370446 |
| H | -5.3007322 | 7.4533812 | 27.8374302 |
| H | -5.5488731 | 5.9960631 | 28.8575617 |
| C | -1.4479928 | 3.3611084 | 31.9354177 |
| C | -0.5569406 | 4.4969291 | 32.4672806 |
| H | -0.2046309 | 4.2518624 | 33.4899614 |
| H | -1.1001103 | 5.4621672 | 32.5369733 |
| H | 0.3386103  | 4.6426187 | 31.8333537 |
| C | -2.6596674 | 3.1496990 | 32.8658159 |
| H | -0.8369817 | 2.4364866 | 31.9592237 |
| H | -3.2995558 | 2.3107162 | 32.5274873 |
| H | -3.2973188 | 4.0581107 | 32.8946160 |
| H | -2.3285089 | 2.9331178 | 33.9024939 |
| H | 8.1499809  | 5.2913314 | 27.0318894 |
| H | 7.6422853  | 1.6034451 | 31.6089910 |
| H | 6.8011205  | 1.6102555 | 24.5651087 |
| C | 8.0653444  | 4.9923651 | 28.1000576 |
| H | 4.0102948  | 2.8858980 | 31.3403019 |
| H | 6.5289375  | 6.5113215 | 28.5092123 |
| H | 3.6059091  | 3.5397732 | 25.4821055 |
| C | 7.0942800  | 3.8193719 | 28.1530067 |
| C | 6.8650586  | 0.8383941 | 31.4016883 |
| C | 7.5279831  | 6.2061115 | 28.8797024 |
| H | 8.2131398  | 7.0740951 | 28.7851667 |
| C | 6.7789796  | 3.1897224 | 29.3701447 |
| C | 5.9257271  | 0.9901905 | 24.8516138 |
| H | 9.4598638  | 4.2940788 | 29.6518267 |
| C | 6.4749862  | 3.3416879 | 26.9875784 |
| C | 9.4711420  | 4.5929733 | 28.5827250 |
| H | 9.8692760  | 3.7374553 | 28.0009226 |
| H | 6.7044161  | 3.8357067 | 26.0296952 |
| C | 4.9407268  | 2.4682312 | 31.7718001 |
| H | 6.6344375  | 0.3287195 | 32.3601948 |
| H | 7.3076184  | 0.0912099 | 30.7121358 |
| C | 5.8830094  | 2.1098029 | 29.4422545 |
| C | 4.3372439  | 2.9720886 | 24.8764332 |
| C | 5.5650635  | 2.2672702 | 27.0019934 |
| H | 5.4501293  | 0.6235809 | 23.9182941 |
| H | 6.3106777  | 0.1112869 | 25.4069810 |
| C | 5.5967635  | 1.4706194 | 30.8000456 |
| C | 5.2808081  | 1.6373018 | 28.2439499 |
| C | 4.9260786  | 1.8079445 | 25.6916047 |
| H | 5.6211941  | 3.3131953 | 32.0071280 |
| H | 5.1240592  | 3.6671108 | 24.5158717 |
| H | 4.6845981  | 1.9700343 | 32.7299478 |
| H | 7.4273966  | 5.9758662 | 29.9610906 |
| H | 3.8135744  | 2.5804713 | 23.9798656 |
| H | 10.1810093 | 5.4400649 | 28.4816495 |
| H | 4.8728604  | 0.6454986 | 30.6397374 |
| H | 4.0793271  | 1.1400905 | 25.9528139 |
| H | 7.2473104  | 3.5514499 | 30.2998864 |

zinc salt of (*S*)-TRIP, most stable conformation according to  $\Delta G$  data; COSMO

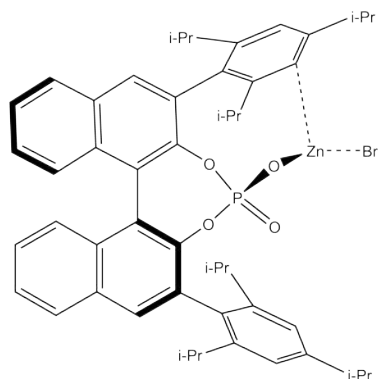

Energy (Hartree) = -6929.285931673

|    |            |            |            |
|----|------------|------------|------------|
| Zn | 2.6823475  | 1.6364635  | 1.0645451  |
| Br | 4.5524310  | 0.4581576  | 1.6949215  |
| C  | -1.3197290 | 3.1518337  | -0.1519526 |
| C  | -2.6662854 | 2.9156708  | 0.1392954  |
| C  | -3.3621613 | 3.8819416  | 0.9572658  |
| C  | -4.6847163 | 3.6706446  | 1.4514902  |
| C  | -2.6878599 | 5.1060711  | 1.3256236  |
| C  | -3.3866487 | 6.0866052  | 2.0923710  |
| C  | -1.3161420 | 5.2883155  | 0.9826696  |
| H  | -0.8040343 | 6.2057005  | 1.3123639  |
| C  | -0.6051948 | 4.3074929  | 0.3042174  |
| C  | -3.2903548 | -0.8281929 | -0.4428181 |
| C  | -4.5413358 | -0.8045712 | -1.0473374 |
| H  | -5.0423992 | -1.7563645 | -1.2815257 |
| C  | -5.1775603 | 0.4155628  | -1.4138235 |
| C  | -6.4176091 | 0.4182019  | -2.1209840 |
| C  | -4.5437246 | 1.6721007  | -1.0936458 |
| C  | -5.1571612 | 2.8735397  | -1.5624139 |
| C  | -3.3043805 | 1.6633756  | -0.3534616 |
| C  | -2.6870944 | 0.4257705  | -0.1120839 |
| O  | -0.6323809 | 2.2576986  | -0.9442206 |
| O  | -1.4638637 | 0.3798948  | 0.5379380  |
| P  | -0.0925199 | 0.8184501  | -0.2906407 |
| O  | 0.8610488  | 1.1558444  | 0.9007764  |
| O  | 0.3631594  | -0.0589532 | -1.4100397 |
| C  | -4.6859583 | 5.8633831  | 2.5227914  |
| C  | -5.3296747 | 4.6356530  | 2.2134708  |
| H  | -2.8636465 | 7.0204529  | 2.3526254  |
| H  | -5.2113696 | 6.6249937  | 3.1188273  |
| H  | -5.1938223 | 2.7232029  | 1.2283423  |
| H  | -6.3478866 | 4.4436859  | 2.5849737  |
| C  | -6.3540764 | 2.8417102  | -2.2653582 |
| C  | -7.0014845 | 1.6062075  | -2.5348667 |
| H  | -4.6632483 | 3.8366728  | -1.3725322 |
| H  | -6.8008563 | 3.7823812  | -2.6221820 |
| H  | -7.9542943 | 1.5935375  | -3.0858073 |
| H  | -6.8943530 | -0.5487007 | -2.3467270 |
| C  | 1.7023973  | 4.1320300  | 1.2927234  |
| C  | 0.8790210  | 4.2956733  | 0.1418317  |
| C  | 3.0897475  | 3.8673823  | 1.1044654  |
| C  | 1.4620655  | 4.2557803  | -1.1585823 |
| C  | 2.8381474  | 3.9910959  | -1.2967927 |
| C  | 3.6787278  | 3.7874361  | -0.1907945 |
| H  | 3.7605556  | 3.8458907  | 1.9808572  |
| C  | 0.6432377  | 4.5357594  | -2.4127062 |
| H  | 3.2700139  | 3.9506845  | -2.3072099 |
| C  | 0.8467781  | 3.4780526  | -3.5106662 |
| H  | 1.8697234  | 3.5168117  | -3.9398150 |

|   |            |            |            |
|---|------------|------------|------------|
| H | 0.1382103  | 3.6585702  | -4.3440749 |
| H | 0.6674292  | 2.4573518  | -3.1207380 |
| C | 0.9558964  | 5.9574105  | -2.9231122 |
| H | -0.4266360 | 4.5206906  | -2.1259337 |
| H | 2.0203326  | 6.0516917  | -3.2244389 |
| H | 0.7546026  | 6.7215791  | -2.1451797 |
| H | 0.3310334  | 6.1942366  | -3.8083515 |
| C | 5.1783298  | 3.5862345  | -0.3373243 |
| C | 5.5457657  | 2.5968416  | -1.4525623 |
| H | 6.6404819  | 2.4240901  | -1.4625800 |
| H | 5.2622389  | 2.9752718  | -2.4563318 |
| H | 5.0515576  | 1.6168600  | -1.2955765 |
| C | 5.8670705  | 4.9519015  | -0.5324879 |
| H | 5.5359769  | 3.1544606  | 0.6226216  |
| H | 6.9681023  | 4.8259510  | -0.5732967 |
| H | 5.6307405  | 5.6493954  | 0.2962470  |
| H | 5.5420520  | 5.4286038  | -1.4808457 |
| C | 1.1768749  | 4.2110955  | 2.7245185  |
| C | 1.5586945  | 2.9851391  | 3.5739071  |
| H | 1.1647742  | 3.0934829  | 4.6044971  |
| H | 2.6574953  | 2.8490439  | 3.6688431  |
| H | 1.1104684  | 2.0603237  | 3.1546608  |
| C | 1.6378560  | 5.5260278  | 3.3827433  |
| H | 0.0716789  | 4.2294515  | 2.6726996  |
| H | 1.1994671  | 5.6243999  | 4.3964727  |
| H | 1.3292101  | 6.4089150  | 2.7871615  |
| H | 2.7425364  | 5.5608587  | 3.4870175  |
| H | -0.2434036 | -6.3070731 | -0.2465603 |
| H | -3.7476694 | -3.4682511 | 3.5521306  |
| H | -3.2485553 | -2.9145411 | -4.4800269 |
| C | -0.5521545 | -5.8765703 | 0.7314458  |
| H | -2.3293624 | -0.6844182 | 4.1658538  |
| H | 1.2652160  | -6.6059050 | 1.7252521  |
| H | -0.8404891 | -2.0753553 | -4.3993153 |
| C | -1.2617770 | -4.5623854 | 0.4295096  |
| C | -4.1319817 | -2.5306768 | 3.0985211  |
| C | 0.7238878  | -5.6506618 | 1.5628570  |
| H | 0.4825484  | -5.2286213 | 2.5610074  |
| C | -1.7955856 | -3.7687231 | 1.4609495  |
| C | -3.1608066 | -3.2660428 | -3.4308215 |
| H | -2.3954128 | -7.0759692 | 0.7956242  |
| C | -1.3908541 | -4.0971452 | -0.8887033 |
| C | -1.4909795 | -6.8904195 | 1.4096787  |
| H | -0.9765684 | -7.8608790 | 1.5690103  |
| H | -0.9651105 | -4.7036396 | -1.7045840 |
| C | -1.9069060 | -1.3144121 | 3.3554093  |
| H | -4.5737607 | -1.9207209 | 3.9138703  |
| H | -4.9448046 | -2.8067533 | 2.3962881  |
| C | -2.4491129 | -2.5510151 | 1.2051942  |
| C | -0.7462323 | -2.4747788 | -3.3679437 |
| C | -2.0297502 | -2.8814844 | -1.2016482 |
| H | -4.1638112 | -3.1987829 | -2.9626495 |
| H | -2.8773724 | -4.3394907 | -3.4561815 |
| C | -3.0140895 | -1.7533880 | 2.3794573  |
| C | -2.5787235 | -2.1097248 | -0.1411212 |
| C | -2.1130840 | -2.4385068 | -2.6623173 |
| H | -1.1303619 | -0.7259853 | 2.8285219  |
| H | -0.0152741 | -1.8512370 | -2.8190440 |
| H | -1.4165633 | -2.1880783 | 3.8337868  |
| H | 1.4130951  | -4.9439710 | 1.0582071  |
| H | -0.3495417 | -3.5080818 | -3.4527300 |
| H | -1.8280730 | -6.5250283 | 2.4024939  |
| H | -3.4757222 | -0.8311041 | 1.9717660  |
| H | -2.4468437 | -1.3808575 | -2.6686335 |
| H | -1.7008889 | -4.1094840 | 2.5048601  |

zinc salt of (*S*)-TRIP, most stable conformation according to  $\Delta G$  data

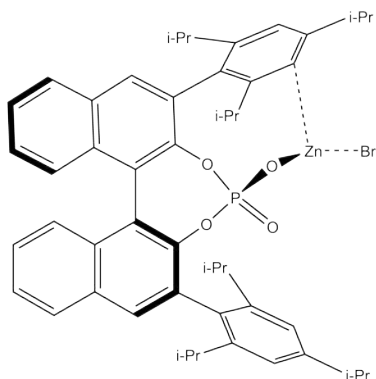

Energy (Hartree) = -6929.275873397

|    |            |            |            |
|----|------------|------------|------------|
| Zn | 2.6689608  | 1.6000274  | 1.0766583  |
| Br | 4.5493076  | 0.4970414  | 1.7777877  |
| C  | -1.3288944 | 3.1547601  | -0.1460188 |
| C  | -2.6758640 | 2.9226388  | 0.1483977  |
| C  | -3.3685757 | 3.8947004  | 0.9617681  |
| C  | -4.6906711 | 3.6880488  | 1.4585643  |
| C  | -2.6927467 | 5.1203213  | 1.3220130  |
| C  | -3.3903318 | 6.1056908  | 2.0828058  |
| C  | -1.3213506 | 5.2982472  | 0.9763784  |
| H  | -0.8073994 | 6.2171205  | 1.2996286  |
| C  | -0.6120588 | 4.3122934  | 0.3037236  |
| C  | -3.2947668 | -0.8225906 | -0.4339050 |
| C  | -4.5457763 | -0.8002882 | -1.0376372 |
| H  | -5.0421677 | -1.7537493 | -1.2748139 |
| C  | -5.1863427 | 0.4185031  | -1.4000222 |
| C  | -6.4268742 | 0.4196986  | -2.1052745 |
| C  | -4.5554255 | 1.6760312  | -1.0785918 |
| C  | -5.1724902 | 2.8759938  | -1.5456021 |
| C  | -3.3155438 | 1.6691590  | -0.3393305 |
| C  | -2.6962262 | 0.4323446  | -0.0982968 |
| O  | -0.6436018 | 2.2571525  | -0.9323327 |
| O  | -1.4756816 | 0.3873265  | 0.5551190  |
| P  | -0.0993016 | 0.8225001  | -0.2667233 |
| O  | 0.8361250  | 1.1862710  | 0.9352737  |
| O  | 0.3823233  | -0.0551247 | -1.3721616 |
| C  | -4.6890030 | 5.8867948  | 2.5156430  |
| C  | -5.3338477 | 4.6582281  | 2.2145710  |
| H  | -2.8662967 | 7.0407887  | 2.3366463  |
| H  | -5.2129909 | 6.6528215  | 3.1071655  |
| H  | -5.1997361 | 2.7395808  | 1.2402008  |
| H  | -6.3519633 | 4.4695238  | 2.5878298  |
| C  | -6.3703796 | 2.8421971  | -2.2459715 |
| C  | -7.0148784 | 1.6060846  | -2.5161271 |
| H  | -4.6801145 | 3.8396952  | -1.3552875 |
| H  | -6.8198891 | 3.7823564  | -2.6005765 |
| H  | -7.9684464 | 1.5914353  | -3.0655821 |
| H  | -6.9006724 | -0.5482900 | -2.3324532 |
| C  | 1.6971167  | 4.1402360  | 1.2919563  |
| C  | 0.8721348  | 4.2942922  | 0.1408190  |
| C  | 3.0806856  | 3.8638326  | 1.1051408  |
| C  | 1.4531240  | 4.2329022  | -1.1598653 |
| C  | 2.8265337  | 3.9561560  | -1.2954267 |
| C  | 3.6673135  | 3.7602723  | -0.1879329 |
| H  | 3.7504671  | 3.8352354  | 1.9817573  |
| C  | 0.6353618  | 4.5023928  | -2.4174495 |
| H  | 3.2560852  | 3.8974725  | -2.3059428 |
| C  | 0.8335972  | 3.4321791  | -3.5040932 |
| H  | 1.8547175  | 3.4649997  | -3.9385204 |

|   |            |            |            |
|---|------------|------------|------------|
| H | 0.1228661  | 3.6040482  | -4.3374251 |
| H | 0.6538162  | 2.4158729  | -3.1033774 |
| C | 0.9522224  | 5.9175770  | -2.9424758 |
| H | -0.4342693 | 4.4936327  | -2.1298011 |
| H | 2.0171880  | 6.0067151  | -3.2436092 |
| H | 0.7527592  | 6.6908917  | -2.1732372 |
| H | 0.3298268  | 6.1480808  | -3.8311159 |
| C | 5.1655510  | 3.5449910  | -0.3349756 |
| C | 5.5228411  | 2.5295604  | -1.4298849 |
| H | 6.6166483  | 2.3516108  | -1.4431295 |
| H | 5.2346508  | 2.8848838  | -2.4408023 |
| H | 5.0277869  | 1.5548626  | -1.2463512 |
| C | 5.8654863  | 4.9001326  | -0.5592104 |
| H | 5.5220443  | 3.1268277  | 0.6314803  |
| H | 6.9655901  | 4.7661785  | -0.6003016 |
| H | 5.6368794  | 5.6170716  | 0.2549690  |
| H | 5.5424486  | 5.3616842  | -1.5157236 |
| C | 1.1737949  | 4.2391352  | 2.7237534  |
| C | 1.5270525  | 3.0104938  | 3.5816714  |
| H | 1.1427763  | 3.1384352  | 4.6137728  |
| H | 2.6222649  | 2.8435989  | 3.6703675  |
| H | 1.0533794  | 2.0954952  | 3.1703901  |
| C | 1.6610538  | 5.5482153  | 3.3741805  |
| H | 0.0692757  | 4.2810320  | 2.6708214  |
| H | 1.2246391  | 5.6641633  | 4.3870121  |
| H | 1.3722681  | 6.4337747  | 2.7725128  |
| H | 2.7660640  | 5.5625536  | 3.4803988  |
| H | -0.2032742 | -6.2750927 | -0.2720214 |
| H | -3.7538694 | -3.5013025 | 3.5355918  |
| H | -3.2182682 | -2.8557523 | -4.4876217 |
| C | -0.5167151 | -5.8543689 | 0.7089355  |
| H | -2.3586390 | -0.7083538 | 4.1767554  |
| H | 1.3110786  | -6.5675251 | 1.6975313  |
| H | -0.8101685 | -2.0132278 | -4.3875388 |
| C | -1.2406564 | -4.5462740 | 0.4150931  |
| C | -4.1429402 | -2.5626610 | 3.0884989  |
| C | 0.7572441  | -5.6185441 | 1.5405455  |
| H | 0.5117478  | -5.2048542 | 2.5410465  |
| C | -1.7887497 | -3.7685318 | 1.4504105  |
| C | -3.1360792 | -3.2158958 | -3.4409463 |
| H | -2.3459712 | -7.0746907 | 0.7660858  |
| C | -1.3649251 | -4.0692125 | -0.8987525 |
| C | -1.4430029 | -6.8838130 | 1.3802870  |
| H | -0.9182250 | -7.8497388 | 1.5332664  |
| H | -0.9258734 | -4.6618884 | -1.7174924 |
| C | -1.9287616 | -1.3300445 | 3.3638051  |
| H | -4.5930385 | -1.9638098 | 3.9075236  |
| H | -4.9503698 | -2.8399182 | 2.3808257  |
| C | -2.4515514 | -2.5547842 | 1.2024889  |
| C | -0.7204670 | -2.4298041 | -3.3626675 |
| C | -2.0126974 | -2.8570760 | -1.2044368 |
| H | -4.1411829 | -3.1505714 | -2.9772284 |
| H | -2.8562485 | -4.2899836 | -3.4738394 |
| C | -3.0282983 | -1.7712107 | 2.3803622  |
| C | -2.5762811 | -2.1020471 | -0.1398985 |
| C | -2.0891425 | -2.3985472 | -2.6606704 |
| H | -1.1536210 | -0.7337299 | 2.8441396  |
| H | 0.0130662  | -1.8196528 | -2.8025047 |
| H | -1.4336221 | -2.2028139 | 3.8386953  |
| H | 1.4364063  | -4.8994276 | 1.0404420  |
| H | -0.3289912 | -3.4635667 | -3.4646114 |
| H | -1.7843335 | -6.5296858 | 2.3756101  |
| H | -3.4958296 | -0.8497057 | 1.9772876  |
| H | -2.4206779 | -1.3400722 | -2.6571298 |
| H | -1.6965853 | -4.1178975 | 2.4916829  |

zinc salt of (*S*)-TRIP, second most stable conformation according to  $\Delta G$  data; COSMO

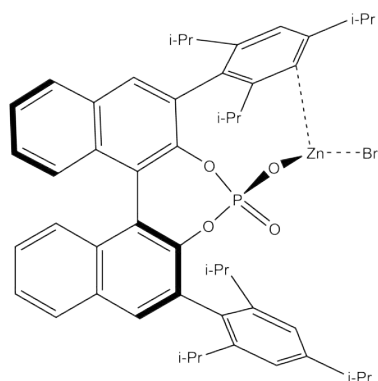

Energy (Hartree) = -6929.285950913

|   |            |            |            |
|---|------------|------------|------------|
| C | 1.3749530  | 1.8699386  | 1.1379671  |
| C | 2.7784042  | 1.8852408  | 1.1714604  |
| C | 3.4437400  | 3.1655784  | 1.2156188  |
| C | 4.8558528  | 3.3100735  | 1.0592725  |
| C | 2.6526694  | 4.3608104  | 1.3849566  |
| C | 3.3067557  | 5.6275932  | 1.4577450  |
| C | 1.2335177  | 4.2599702  | 1.4459619  |
| H | 0.6417022  | 5.1763717  | 1.5935144  |
| C | 0.5753656  | 3.0469741  | 1.2830279  |
| C | 3.8731757  | -1.6237347 | 0.0764882  |
| C | 4.9151183  | -1.8916573 | 0.9542469  |
| H | 5.4531713  | -2.8501001 | 0.8880076  |
| C | 5.2636361  | -0.9783798 | 1.9920480  |
| C | 6.2829047  | -1.3003750 | 2.9382002  |
| C | 4.5275457  | 0.2571001  | 2.1361678  |
| C | 4.8002610  | 1.0702493  | 3.2775374  |
| C | 3.5315129  | 0.6005642  | 1.1476954  |
| C | 3.2318207  | -0.3447879 | 0.1626441  |
| O | 0.7004947  | 0.6640000  | 1.0294343  |
| O | 2.2985841  | -0.0407510 | -0.8049862 |
| P | 0.6706493  | -0.1146442 | -0.4378097 |
| O | -0.0883331 | 0.5229833  | -1.5550031 |
| O | 0.3447162  | -1.5717771 | 0.0227632  |
| C | 4.6843018  | 5.7286058  | 1.3323999  |
| C | 5.4604132  | 4.5586945  | 1.1152326  |
| H | 2.6896565  | 6.5288839  | 1.5995241  |
| H | 5.1752588  | 6.7124224  | 1.3831758  |
| H | 5.4691053  | 2.4162272  | 0.8789417  |
| H | 6.5501489  | 4.6421244  | 0.9834782  |
| C | 5.7839596  | 0.7182466  | 4.1920833  |
| C | 6.5472090  | -0.4664377 | 4.0143979  |
| H | 4.2135482  | 1.9855310  | 3.4342641  |
| H | 5.9693497  | 1.3619251  | 5.0655177  |
| H | 7.3314126  | -0.7295407 | 4.7404679  |
| H | 6.8445233  | -2.2386758 | 2.8062235  |
| C | -1.6381974 | 3.4374749  | 0.1275020  |
| C | -0.9179386 | 2.9514436  | 1.2553588  |
| C | -3.0423476 | 3.3598870  | 0.1397550  |
| C | -1.6131209 | 2.3722153  | 2.3506885  |
| C | -3.0188554 | 2.3138606  | 2.3072303  |
| C | -3.7554564 | 2.8038836  | 1.2167059  |
| H | -3.5985076 | 3.7387918  | -0.7323968 |
| C | -0.8860384 | 1.8284416  | 3.5792446  |
| H | -3.5650694 | 1.8695774  | 3.1558820  |
| C | -1.1386295 | 0.3216409  | 3.7707661  |
| H | -2.2090854 | 0.1117066  | 3.9769514  |
| H | -0.5517566 | -0.0654632 | 4.6297999  |
| H | -0.8419290 | -0.2438667 | 2.8657430  |

|    |            |            |            |
|----|------------|------------|------------|
| C  | -1.2433108 | 2.6310325  | 4.8438665  |
| H  | 0.2027266  | 1.9594602  | 3.4133237  |
| H  | -2.3214919 | 2.5397621  | 5.0922188  |
| H  | -1.0195210 | 3.7092961  | 4.7119696  |
| H  | -0.6662063 | 2.2642152  | 5.7181426  |
| C  | -5.2767337 | 2.7186359  | 1.1960937  |
| C  | -5.9265313 | 4.1115944  | 1.1134928  |
| H  | -7.0327805 | 4.0350917  | 1.1587759  |
| H  | -5.6664050 | 4.6210151  | 0.1619155  |
| H  | -5.5910879 | 4.7631370  | 1.9456155  |
| C  | -5.7743409 | 1.7999703  | 0.0651213  |
| H  | -5.5864096 | 2.2605404  | 2.1613872  |
| H  | -6.8790521 | 1.6969735  | 0.0955481  |
| H  | -5.3299957 | 0.7873449  | 0.1440288  |
| H  | -5.5029214 | 2.2077619  | -0.9311887 |
| C  | -0.9371017 | 4.0420118  | -1.0891974 |
| C  | -1.4141303 | 3.4204353  | -2.4133583 |
| H  | -0.8277152 | 3.8340439  | -3.2601864 |
| H  | -2.4824892 | 3.6435742  | -2.6163681 |
| H  | -1.2715825 | 2.3233045  | -2.3945640 |
| C  | -1.0869297 | 5.5751011  | -1.1056846 |
| H  | 0.1434596  | 3.8087905  | -0.9989110 |
| H  | -0.5427076 | 6.0156444  | -1.9669542 |
| H  | -0.6920960 | 6.0381551  | -0.1786891 |
| H  | -2.1545696 | 5.8678727  | -1.1941962 |
| H  | 0.2115079  | -5.7683592 | -2.8494104 |
| H  | 4.9771863  | -2.5530149 | -4.4271818 |
| C  | 3.5236522  | -5.6217979 | 2.4529471  |
| C  | 0.9149925  | -5.2057650 | -3.5008449 |
| H  | 3.8556614  | 0.4818640  | -4.1841182 |
| H  | -0.5371898 | -5.1721463 | -5.1275270 |
| H  | 1.2536603  | -4.5481651 | 2.8429635  |
| C  | 1.7004349  | -4.2753376 | -2.5906179 |
| C  | 5.2844977  | -1.8820859 | -3.5976952 |
| C  | 0.0758396  | -4.4554664 | -4.5453613 |
| H  | 0.7085896  | -3.8993754 | -5.2674268 |
| C  | 2.4398608  | -3.1899310 | -3.0874174 |
| C  | 3.4405618  | -5.3841856 | 1.3730644  |
| H  | 2.4481753  | -6.7872404 | -3.3968800 |
| C  | 1.7816059  | -4.5393413 | -1.1924977 |
| C  | 1.8731579  | -6.2202052 | -4.1564986 |
| H  | 1.3035306  | -6.9471297 | -4.7704250 |
| H  | 1.3187757  | -5.4666805 | -0.8125829 |
| C  | 3.2406169  | -0.3775505 | -3.8488684 |
| H  | 5.9241319  | -1.0839193 | -4.0266954 |
| H  | 5.9008073  | -2.4753167 | -2.8921010 |
| C  | 3.2298243  | -2.3729700 | -2.2561427 |
| C  | 1.1835701  | -4.2679629 | 1.7726276  |
| C  | 2.5652938  | -3.7380223 | -0.3127221 |
| H  | 4.4652873  | -5.2572788 | 0.9688151  |
| H  | 2.9863652  | -6.2619506 | 0.8675425  |
| C  | 4.0579275  | -1.2648965 | -2.8948728 |
| C  | 3.2696068  | -2.6241692 | -0.8531925 |
| C  | 2.5906925  | -4.1152952 | 1.1670815  |
| H  | 2.3362318  | 0.0199406  | -3.3489122 |
| H  | 0.6291930  | -3.3073680 | 1.7281501  |
| H  | 2.9265572  | -0.9273368 | -4.7606183 |
| H  | -0.6160339 | -3.7369740 | -4.0609621 |
| H  | 0.5823766  | -5.0605599 | 1.2775092  |
| H  | 2.6004817  | -5.7079386 | -4.8205132 |
| H  | 4.4401799  | -0.6188869 | -2.0802158 |
| H  | 3.0826552  | -3.2878943 | 1.7128630  |
| H  | 2.4081822  | -2.9741855 | -4.1652265 |
| Zn | -0.0230537 | -3.2149499 | -0.8352734 |
| Br | -1.9712351 | -4.3842971 | -1.1823137 |

zinc salt of (*S*)-TRIP, second most stable conformation according to  $\Delta G$  data



Energy (Hartree) = -6929.275914391

|   |            |            |            |
|---|------------|------------|------------|
| C | 1.3815776  | 1.8741394  | 1.1404990  |
| C | 2.7850246  | 1.8889346  | 1.1766641  |
| C | 3.4505930  | 3.1688847  | 1.2230106  |
| C | 4.8628996  | 3.3132961  | 1.0711057  |
| C | 2.6593339  | 4.3641801  | 1.3898465  |
| C | 3.3139866  | 5.6299711  | 1.4641130  |
| C | 1.2402001  | 4.2633945  | 1.4475841  |
| H | 0.6470433  | 5.1790758  | 1.5939393  |
| C | 0.5816601  | 3.0510926  | 1.2841971  |
| C | 3.8693311  | -1.6218841 | 0.0790748  |
| C | 4.9096876  | -1.8944884 | 0.9571597  |
| H | 5.4432689  | -2.8556037 | 0.8906305  |
| C | 5.2625467  | -0.9831780 | 1.9949184  |
| C | 6.2810056  | -1.3079136 | 2.9403311  |
| C | 4.5311682  | 0.2550406  | 2.1391506  |
| C | 4.8078588  | 1.0670374  | 3.2801617  |
| C | 3.5362735  | 0.6032325  | 1.1515039  |
| C | 3.2333515  | -0.3396974 | 0.1646175  |
| O | 0.7068633  | 0.6693161  | 1.0306967  |
| O | 2.3041768  | -0.0324554 | -0.8028006 |
| P | 0.6732330  | -0.1066557 | -0.4380498 |
| O | -0.0876039 | 0.5177160  | -1.5585408 |
| O | 0.3625695  | -1.5681777 | 0.0291104  |
| C | 4.6914480  | 5.7309659  | 1.3435961  |
| C | 5.4675648  | 4.5613002  | 1.1294789  |
| H | 2.6964500  | 6.5313678  | 1.6030954  |
| H | 5.1821791  | 6.7147565  | 1.3957446  |
| H | 5.4756902  | 2.4188136  | 0.8928266  |
| H | 6.5577516  | 4.6441568  | 1.0015002  |
| C | 5.7910256  | 0.7120047  | 4.1933666  |
| C | 6.5495489  | -0.4750526 | 4.0156100  |
| H | 4.2243299  | 1.9844655  | 3.4354092  |
| H | 5.9796765  | 1.3556009  | 5.0660914  |
| H | 7.3336938  | -0.7408074 | 4.7407043  |
| H | 6.8393000  | -2.2482202 | 2.8080595  |
| C | -1.6326902 | 3.4196914  | 0.1229990  |
| C | -0.9114273 | 2.9523071  | 1.2575301  |
| C | -3.0358862 | 3.3336604  | 0.1356738  |
| C | -1.6034247 | 2.3828861  | 2.3594559  |
| C | -3.0081692 | 2.3161508  | 2.3157827  |
| C | -3.7462261 | 2.7872989  | 1.2187030  |
| H | -3.5930169 | 3.6956713  | -0.7427824 |
| C | -0.8730133 | 1.8541656  | 3.5925259  |
| H | -3.5523021 | 1.8781076  | 3.1689551  |
| C | -1.1145198 | 0.3470430  | 3.7948835  |
| H | -2.1830834 | 0.1308301  | 4.0039457  |
| H | -0.5239197 | -0.0307982 | 4.6555023  |
| H | -0.8168927 | -0.2224997 | 2.8929010  |

|    |            |            |            |
|----|------------|------------|------------|
| C  | -1.2355694 | 2.6638754  | 4.8508126  |
| H  | 0.2149118  | 1.9917255  | 3.4256176  |
| H  | -2.3132238 | 2.5686480  | 5.0995163  |
| H  | -1.0191864 | 3.7424208  | 4.7107022  |
| H  | -0.6573675 | 2.3077776  | 5.7288073  |
| C  | -5.2664666 | 2.6874764  | 1.1956263  |
| C  | -5.9304520 | 4.0712928  | 1.0827629  |
| H  | -7.0360825 | 3.9855243  | 1.1266991  |
| H  | -5.6731614 | 4.5640224  | 0.1218196  |
| H  | -5.6030614 | 4.7436631  | 1.9011326  |
| C  | -5.7509062 | 1.7396968  | 0.0832484  |
| H  | -5.5746433 | 2.2464948  | 2.1695723  |
| H  | -6.8545865 | 1.6252331  | 0.1111036  |
| H  | -5.2952498 | 0.7344134  | 0.1845616  |
| H  | -5.4790826 | 2.1281097  | -0.9204865 |
| C  | -0.9324585 | 4.0123933  | -1.0999204 |
| C  | -1.4200984 | 3.3911268  | -2.4201026 |
| H  | -0.8289972 | 3.7926745  | -3.2693090 |
| H  | -2.4850780 | 3.6294059  | -2.6238198 |
| H  | -1.2932135 | 2.2922959  | -2.3979749 |
| C  | -1.0692016 | 5.5466375  | -1.1209128 |
| H  | 0.1464743  | 3.7696446  | -1.0136680 |
| H  | -0.5277384 | 5.9800164  | -1.9874874 |
| H  | -0.6648046 | 6.0106323  | -0.1986587 |
| H  | -2.1349234 | 5.8479729  | -1.2024291 |
| H  | 0.1878787  | -5.7392200 | -2.8619055 |
| H  | 4.9707660  | -2.5372484 | -4.4276331 |
| H  | 3.4867983  | -5.6278841 | 2.4480336  |
| C  | 0.9035924  | -5.1873495 | -3.5093734 |
| H  | 3.8512650  | 0.5008252  | -4.1712842 |
| H  | -0.5323751 | -5.1542849 | -5.1507651 |
| H  | 1.2313195  | -4.5332500 | 2.8391793  |
| C  | 1.6875553  | -4.2585308 | -2.5953709 |
| C  | 5.2781999  | -1.8685860 | -3.5963246 |
| C  | 0.0784398  | -4.4382975 | -4.5655439 |
| H  | 0.7196316  | -3.8878953 | -5.2846357 |
| C  | 2.4315905  | -3.1744915 | -3.0884143 |
| C  | 3.4039719  | -5.3878751 | 1.3685671  |
| H  | 2.4243255  | -6.7797469 | -3.3829371 |
| C  | 1.7654219  | -4.5241757 | -1.1986762 |
| C  | 1.8597359  | -6.2127837 | -4.1503956 |
| H  | 1.2921983  | -6.9398112 | -4.7661807 |
| H  | 1.2857922  | -5.4424748 | -0.8183541 |
| C  | 3.2358379  | -0.3596045 | -3.8394897 |
| H  | 5.9189306  | -1.0707274 | -4.0242478 |
| H  | 5.8948934  | -2.4647129 | -2.8935982 |
| C  | 3.2230188  | -2.3618330 | -2.2549095 |
| C  | 1.1628070  | -4.2410699 | 1.7718510  |
| C  | 2.5503885  | -3.7294788 | -0.3168016 |
| H  | 4.4296402  | -5.2754969 | 0.9623161  |
| H  | 2.9387524  | -6.2607494 | 0.8644578  |
| C  | 4.0527814  | -1.2528519 | -2.8907450 |
| C  | 3.2617943  | -2.6178947 | -0.8529149 |
| C  | 2.5706424  | -4.1080983 | 1.1630770  |
| H  | 2.3326041  | 0.0375533  | -3.3374658 |
| H  | 0.6262586  | -3.2708173 | 1.7349375  |
| H  | 2.9210227  | -0.9035764 | -4.7546680 |
| H  | -0.6162024 | -3.7163914 | -4.0909058 |
| H  | 0.5446988  | -5.0166853 | 1.2704268  |
| H  | 2.5980780  | -5.7105679 | -4.8099164 |
| H  | 4.4358693  | -0.6107210 | -2.0735188 |
| H  | 3.0748936  | -3.2874583 | 1.7080512  |
| H  | 2.4011024  | -2.9548455 | -4.1654348 |
| Zn | -0.0635057 | -3.1703353 | -0.8649767 |
| Br | -1.9719755 | -4.3833953 | -1.2246579 |

**zinc salt of (*S*)-TRIP, high energy conformation; COSMO**

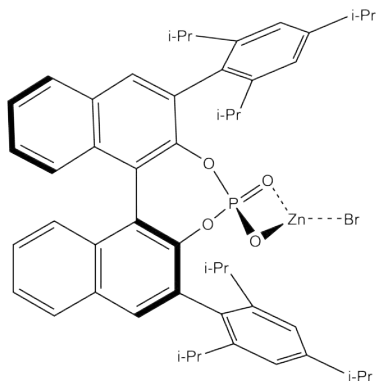

Energy (Hartree) = -6929.277339288

|   |            |            |            |
|---|------------|------------|------------|
| C | -0.0089901 | 0.7961219  | 29.2841903 |
| C | 0.7514910  | -0.3324283 | 29.6052936 |
| C | 0.2156364  | -1.2341520 | 30.5987037 |
| C | 0.9632267  | -2.3234301 | 31.1390050 |
| C | -1.1197168 | -1.0070284 | 31.1012179 |
| C | -1.6690343 | -1.9161480 | 32.0551186 |
| C | -1.8477885 | 0.1464075  | 30.6873570 |
| H | -2.8528696 | 0.3164226  | 31.1021122 |
| C | -1.2969618 | 1.0893890  | 29.8285080 |
| C | 4.3192045  | 0.4187713  | 28.3750704 |
| C | 4.6952454  | -0.8089119 | 27.8444346 |
| H | 5.7036665  | -0.9270832 | 27.4198367 |
| C | 3.7867920  | -1.9050473 | 27.7728700 |
| C | 4.1645118  | -3.1286103 | 27.1416759 |
| C | 2.4450251  | -1.7633493 | 28.2896116 |
| C | 1.5241802  | -2.8330536 | 28.0771790 |
| C | 2.0807650  | -0.5372951 | 28.9613436 |
| C | 3.0157160  | 0.5021240  | 28.9539213 |
| O | 0.4866723  | 1.7102941  | 28.3486627 |
| O | 2.6920251  | 1.7153853  | 29.5698634 |
| P | 1.6720237  | 2.7316115  | 28.8060257 |
| O | 1.2951882  | 3.8474892  | 29.8177555 |
| O | 2.1963942  | 3.4294241  | 27.5218734 |
| C | -0.9266915 | -2.9858640 | 32.5324178 |
| C | 0.4065249  | -3.1773599 | 32.0816377 |
| H | -2.6928994 | -1.7383155 | 32.4198839 |
| H | -1.3604863 | -3.6748058 | 33.2730661 |
| H | 1.9992532  | -2.4793471 | 30.8081842 |
| H | 1.0070338  | -4.0061694 | 32.4866289 |
| C | 1.9181395  | -4.0024853 | 27.4408189 |
| C | 3.2534903  | -4.1622414 | 26.9840164 |
| H | 0.4849231  | -2.7214145 | 28.4156801 |
| H | 1.1863859  | -4.8097484 | 27.2845609 |
| H | 3.5567269  | -5.0975033 | 26.4893398 |
| H | 5.1942403  | -3.2275796 | 26.7638071 |
| C | -1.9646549 | 3.4176391  | 30.5321358 |
| C | -1.9208847 | 2.4150481  | 29.5213710 |
| C | -2.4301755 | 4.7006785  | 30.1854533 |
| C | -2.3535013 | 2.7160719  | 28.1993334 |
| C | -2.8063776 | 4.0142313  | 27.9096162 |
| C | -2.8396935 | 5.0287852  | 28.8835070 |
| H | -2.4539114 | 5.4874590  | 30.9562873 |
| C | -2.3640111 | 1.6631788  | 27.0929234 |
| H | -3.1329697 | 4.2442661  | 26.8829640 |
| C | -1.5949803 | 2.1190751  | 25.8404540 |
| H | -2.0946157 | 2.9755935  | 25.3415744 |
| H | -1.5376051 | 1.2955530  | 25.0990911 |
| H | -0.5617149 | 2.4244995  | 26.0976174 |

|    |            |           |            |
|----|------------|-----------|------------|
| C  | -3.8083584 | 1.2498582 | 26.7515932 |
| H  | -1.8541149 | 0.7580137 | 27.4817143 |
| H  | -4.3879237 | 2.1098209 | 26.3549017 |
| H  | -4.3408012 | 0.8712946 | 27.6477508 |
| H  | -3.8187466 | 0.4509910 | 25.9812356 |
| C  | -3.2528346 | 6.4513551 | 28.5294230 |
| C  | -2.1974594 | 7.1132820 | 27.6227246 |
| H  | -2.4612347 | 8.1701594 | 27.4103379 |
| H  | -2.1203142 | 6.5836360 | 26.6497362 |
| H  | -1.1915384 | 7.1003358 | 28.0900422 |
| C  | -4.6552978 | 6.5181363 | 27.9010033 |
| H  | -3.2831251 | 7.0244833 | 29.4822098 |
| H  | -4.9523885 | 7.5707613 | 27.7145712 |
| H  | -5.4167765 | 6.0569119 | 28.5619665 |
| H  | -4.6892308 | 5.9879813 | 26.9262260 |
| C  | -1.5234846 | 3.1547681 | 31.9722753 |
| C  | -0.6062587 | 4.2540971 | 32.5357990 |
| H  | -0.2295616 | 3.9581987 | 33.5366643 |
| H  | -1.1409220 | 5.2184650 | 32.6630462 |
| H  | 0.2604228  | 4.4175288 | 31.8674399 |
| C  | -2.7485643 | 2.9393710 | 32.8825991 |
| H  | -0.9348751 | 2.2147755 | 31.9754048 |
| H  | -2.4329549 | 2.7012908 | 33.9196910 |
| H  | -3.3914667 | 2.1117670 | 32.5207376 |
| H  | -3.3768306 | 3.8542349 | 32.9200354 |
| H  | 7.1940883  | 5.8130192 | 26.9870553 |
| H  | 7.6147735  | 1.9370754 | 31.4540964 |
| H  | 5.5856153  | 0.5512814 | 24.0145963 |
| C  | 7.0961281  | 5.5620476 | 28.0661718 |
| H  | 4.7059458  | 1.9816062 | 32.8351942 |
| H  | 6.5944588  | 7.6350170 | 28.6002802 |
| H  | 3.6077917  | 2.1855489 | 23.9623331 |
| C  | 6.4655809  | 4.1776643 | 28.1414562 |
| C  | 6.8999307  | 1.0982929 | 31.3191089 |
| C  | 6.1702818  | 6.6148262 | 28.7053440 |
| H  | 6.0324704  | 6.4178472 | 29.7895842 |
| C  | 6.3014450  | 3.5159666 | 29.3719230 |
| C  | 5.9602163  | 1.0354697 | 24.9404176 |
| H  | 9.1746082  | 4.8564682 | 28.2117962 |
| C  | 5.9810542  | 3.5431651 | 26.9868934 |
| C  | 8.5042020  | 5.6029216 | 28.6838460 |
| H  | 8.9602928  | 6.6061614 | 28.5555012 |
| H  | 6.1057838  | 4.0518686 | 26.0176096 |
| C  | 4.8708497  | 2.5293249 | 31.8844665 |
| H  | 6.8077844  | 0.5724699 | 32.2921629 |
| H  | 7.3442722  | 0.3934479 | 30.5872223 |
| C  | 5.6505594  | 2.2747226 | 29.4709874 |
| C  | 4.0508952  | 2.7036196 | 24.8377799 |
| C  | 5.3178167  | 2.3016023 | 27.0268396 |
| H  | 6.4798643  | 0.2647193 | 25.5447287 |
| H  | 6.7181504  | 1.7915858 | 24.6456508 |
| C  | 5.5277877  | 1.6094598 | 30.8402709 |
| C  | 5.1463125  | 1.6635090 | 28.2886936 |
| C  | 4.8056374  | 1.6943727 | 25.7204872 |
| H  | 3.8908102  | 2.9011315 | 31.5263150 |
| H  | 3.2367825  | 3.1877750 | 25.4099610 |
| H  | 5.5093370  | 3.4068517 | 32.1176004 |
| H  | 5.1653239  | 6.6138493 | 28.2358585 |
| H  | 4.7218027  | 3.4939562 | 24.4411097 |
| H  | 8.4761084  | 5.3899337 | 29.7729589 |
| H  | 4.8749414  | 0.7198464 | 30.7272204 |
| H  | 4.0818360  | 0.8965508 | 25.9839018 |
| Zn | 1.8710034  | 5.2319457 | 28.4285332 |
| Br | 2.0391482  | 7.4570024 | 28.0886658 |
| H  | 6.6826299  | 3.9886129 | 30.2911622 |



zinc salt of (*S*)-TRIP, high energy conformation

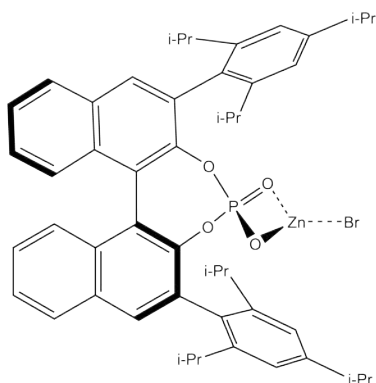

Energy (Hartree) = -6929.26922604

|   |            |            |            |
|---|------------|------------|------------|
| C | -0.0088886 | 0.7985675  | 29.2881247 |
| C | 0.7522789  | -0.3304345 | 29.6058952 |
| C | 0.2188434  | -1.2320683 | 30.6006900 |
| C | 0.9671303  | -2.3221300 | 31.1377900 |
| C | -1.1144830 | -1.0043678 | 31.1079436 |
| C | -1.6602253 | -1.9136796 | 32.0629953 |
| C | -1.8434276 | 0.1490214  | 30.6961893 |
| H | -2.8471467 | 0.3203957  | 31.1136649 |
| C | -1.2957089 | 1.0915989  | 29.8354088 |
| C | 4.3175568  | 0.4191805  | 28.3661726 |
| C | 4.6913696  | -0.8085142 | 27.8347970 |
| H | 5.6990815  | -0.9261371 | 27.4083921 |
| C | 3.7825144  | -1.9042059 | 27.7653688 |
| C | 4.1575226  | -3.1281313 | 27.1343490 |
| C | 2.4424403  | -1.7621497 | 28.2860381 |
| C | 1.5214952  | -2.8322119 | 28.0775606 |
| C | 2.0795965  | -0.5356778 | 28.9577253 |
| C | 3.0146755  | 0.5035571  | 28.9463381 |
| O | 0.4824972  | 1.7134944  | 28.3524947 |
| O | 2.6942212  | 1.7176081  | 29.5602325 |
| P | 1.6711387  | 2.7340527  | 28.8016252 |
| O | 1.3072207  | 3.8516968  | 29.8166328 |
| O | 2.1828980  | 3.4306883  | 27.5113732 |
| C | -0.9177398 | -2.9842119 | 32.5366941 |
| C | 0.4131109  | -3.1763074 | 32.0811474 |
| H | -2.6824419 | -1.7348114 | 32.4318063 |
| H | -1.3497716 | -3.6732784 | 33.2781734 |
| H | 2.0015826  | -2.4778579 | 30.8023282 |
| H | 1.0145052  | -4.0058463 | 32.4831760 |
| C | 1.9135479  | -4.0019730 | 27.4415693 |
| C | 3.2467931  | -4.1619020 | 26.9806003 |
| H | 0.4838296  | -2.7195574 | 28.4202710 |
| H | 1.1813324  | -4.8093865 | 27.2886631 |
| H | 3.5487880  | -5.0973585 | 26.4856578 |
| H | 5.1860537  | -3.2271066 | 26.7532835 |
| C | -1.9598660 | 3.4234141  | 30.5309552 |
| C | -1.9202394 | 2.4161332  | 29.5251205 |
| C | -2.4221457 | 4.7057376  | 30.1784285 |
| C | -2.3544723 | 2.7115118  | 28.2025072 |
| C | -2.8042559 | 4.0091424  | 27.9075441 |
| C | -2.8330336 | 5.0286179  | 28.8760096 |
| H | -2.4423470 | 5.4961583  | 30.9454966 |
| C | -2.3700184 | 1.6530705  | 27.1014284 |
| H | -3.1327274 | 4.2346542  | 26.8805238 |
| C | -1.6027170 | 2.0996344  | 25.8446888 |
| H | -2.1003038 | 2.9550642  | 25.3419693 |
| H | -1.5502780 | 1.2725751  | 25.1070324 |
| H | -0.5674677 | 2.4022792  | 26.0962144 |

|    |            |           |            |
|----|------------|-----------|------------|
| C  | -3.8162458 | 1.2414388 | 26.7666934 |
| H  | -1.8612342 | 0.7488383 | 27.4939666 |
| H  | -4.3955133 | 2.1005127 | 26.3680122 |
| H  | -4.3471439 | 0.8693929 | 27.6662503 |
| H  | -3.8317740 | 0.4389375 | 26.0002634 |
| C  | -3.2444601 | 6.4499762 | 28.5152558 |
| C  | -2.1922083 | 7.1056838 | 27.6007261 |
| H  | -2.4562429 | 8.1608746 | 27.3809383 |
| H  | -2.1180054 | 6.5697410 | 26.6310319 |
| H  | -1.1846321 | 7.0976172 | 28.0641718 |
| C  | -4.6498876 | 6.5152746 | 27.8935655 |
| H  | -3.2698965 | 7.0284581 | 29.4650811 |
| H  | -4.9476215 | 7.5669116 | 27.7030177 |
| H  | -5.4084650 | 6.0570637 | 28.5595812 |
| H  | -4.6894242 | 5.9806218 | 26.9215685 |
| C  | -1.5186617 | 3.1655016 | 31.9719144 |
| C  | -0.5994012 | 4.2647032 | 32.5319236 |
| H  | -0.2234215 | 3.9719531 | 33.5338366 |
| H  | -1.1315841 | 5.2307271 | 32.6564742 |
| H  | 0.2684001  | 4.4249399 | 31.8644801 |
| C  | -2.7446724 | 2.9557117 | 32.8821319 |
| H  | -0.9318712 | 2.2243476 | 31.9786568 |
| H  | -2.4310773 | 2.7210335 | 33.9205278 |
| H  | -3.3894482 | 2.1285872 | 32.5227257 |
| H  | -3.3719564 | 3.8712256 | 32.9153819 |
| H  | 7.1833255  | 5.8243832 | 27.0051300 |
| H  | 7.6147546  | 1.9234035 | 31.4481649 |
| H  | 5.5947446  | 0.5684778 | 24.0092588 |
| C  | 7.0877167  | 5.5665063 | 28.0829463 |
| H  | 4.7063794  | 1.9560273 | 32.8334045 |
| H  | 6.5875964  | 7.6359033 | 28.6339022 |
| H  | 3.6130125  | 2.1996792 | 23.9563938 |
| C  | 6.4589206  | 4.1809503 | 28.1503032 |
| C  | 6.9004557  | 1.0848552 | 31.3099167 |
| C  | 6.1631613  | 6.6150915 | 28.7304328 |
| H  | 6.0256819  | 6.4103754 | 29.8132179 |
| C  | 6.2964257  | 3.5122061 | 29.3768389 |
| C  | 5.9648723  | 1.0505501 | 24.9378878 |
| H  | 9.1661355  | 4.8589789 | 28.2198325 |
| C  | 5.9757258  | 3.5515286 | 26.9928501 |
| C  | 8.4974558  | 5.6035145 | 28.6968278 |
| H  | 8.9541976  | 6.6070241 | 28.5736024 |
| H  | 6.0992221  | 4.0653679 | 26.0262340 |
| C  | 4.8689291  | 2.5089128 | 31.8853616 |
| H  | 6.8110503  | 0.5537676 | 32.2803152 |
| H  | 7.3453565  | 0.3852671 | 30.5736364 |
| C  | 5.6483295  | 2.2694734 | 29.4696685 |
| C  | 4.0528712  | 2.7154961 | 24.8346339 |
| C  | 5.3156921  | 2.3083480 | 27.0259054 |
| H  | 6.4847107  | 0.2794213 | 25.5414164 |
| H  | 6.7229874  | 1.8082388 | 24.6482587 |
| C  | 5.5271955  | 1.5967059 | 30.8354652 |
| C  | 5.1452898  | 1.6637020 | 28.2842258 |
| C  | 4.8069422  | 1.7051963 | 25.7164055 |
| H  | 3.8873975  | 2.8803247 | 31.5315469 |
| H  | 3.2357746  | 3.1969909 | 25.4045030 |
| H  | 5.5051069  | 3.3867035 | 32.1236571 |
| H  | 5.1580795  | 6.6202387 | 28.2616285 |
| H  | 4.7229018  | 3.5081547 | 24.4413035 |
| H  | 8.4725917  | 5.3844214 | 29.7847117 |
| H  | 4.8756482  | 0.7067122 | 30.7176207 |
| H  | 4.0836727  | 0.9054075 | 25.9755038 |
| Zn | 1.8707377  | 5.2325289 | 28.4210371 |
| Br | 2.0394061  | 7.4504238 | 28.0792249 |
| H  | 6.6773043  | 3.9803213 | 30.2984710 |

## 4 Uncatalyzed Background Reaction

### 4.1 Educt Complexes 16

ed<sub>unc.</sub> = 16<sub>1</sub>; COSMO

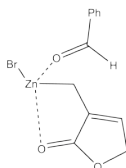

Energy (Hartree) = -5040.681416145

|    |            |            |            |
|----|------------|------------|------------|
| C  | -4.3107479 | -0.2200071 | -1.2730258 |
| C  | -3.2430085 | 0.6562699  | -1.0396990 |
| C  | -2.2264541 | 0.3013295  | -0.1238205 |
| C  | -2.2857957 | -0.9384326 | 0.5569275  |
| C  | -3.3530286 | -1.8088816 | 0.3209050  |
| C  | -4.3643499 | -1.4495901 | -0.5931211 |
| H  | -5.1040922 | 0.0524327  | -1.9850442 |
| H  | -3.1861123 | 1.6234020  | -1.5642995 |
| C  | -1.1183713 | 1.2306982  | 0.1057777  |
| H  | -1.4818962 | -1.1912264 | 1.2647288  |
| H  | -3.4061470 | -2.7738067 | 0.8474319  |
| H  | -5.2038259 | -2.1381865 | -0.7760164 |
| O  | -0.1857015 | 1.0026870  | 0.8912029  |
| H  | -1.1409609 | 2.1970469  | -0.4623520 |
| H  | 4.2778725  | -2.0884782 | -1.1851044 |
| Br | 0.3587469  | 4.4226137  | 0.6889054  |
| H  | 3.9648162  | 2.0827706  | 1.2652310  |
| Zn | 1.4935582  | 2.3902419  | 0.9388385  |
| C  | 3.6356965  | -1.0599555 | 0.6381801  |
| C  | 3.3565108  | -1.7465098 | -0.6630875 |
| H  | 4.1449974  | -1.5521744 | 1.4785194  |
| C  | 3.1822255  | 0.2213172  | 0.5808091  |
| C  | 3.1345203  | 1.3790867  | 1.5014321  |
| C  | 2.5470077  | 0.3683297  | -0.7570460 |
| O  | 2.6939606  | -0.7636775 | -1.4847505 |
| O  | 1.9091278  | 1.3414488  | -1.1626719 |
| H  | 2.6783099  | -2.6244795 | -0.5728691 |
| H  | 3.2332417  | 1.0859310  | 2.5640185  |

ed<sub>unc.</sub> = 16<sub>1</sub>

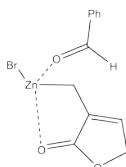

Energy (Hartree) = -5040.671404853

|   |            |            |            |
|---|------------|------------|------------|
| C | -4.3691152 | -0.1719499 | -1.2136937 |
| C | -3.3043565 | 0.7050919  | -0.9700760 |
| C | -2.2424686 | 0.3091144  | -0.1269397 |
| C | -2.2536533 | -0.9728902 | 0.4709826  |
| C | -3.3175129 | -1.8446406 | 0.2253495  |
| C | -4.3742840 | -1.4441022 | -0.6162590 |
| H | -5.1979342 | 0.1331218  | -1.8699127 |
| H | -3.2845681 | 1.7057875  | -1.4306902 |
| C | -1.1342932 | 1.2395430  | 0.1161409  |
| H | -1.4127193 | -1.2538030 | 1.1229766  |

|    |            |            |            |
|----|------------|------------|------------|
| H  | -3.3325716 | -2.8431309 | 0.6880365  |
| H  | -5.2111396 | -2.1336436 | -0.8074622 |
| O  | -0.1690169 | 0.9720347  | 0.8445395  |
| H  | -1.1879488 | 2.2433047  | -0.3829860 |
| H  | 4.2976093  | -2.1377222 | -1.1053888 |
| Br | 0.3483885  | 4.4047645  | 0.6129770  |
| H  | 3.9682829  | 2.1111298  | 1.2080994  |
| Zn | 1.5016019  | 2.4023080  | 0.8763982  |
| C  | 3.6503516  | -1.0544083 | 0.6861560  |
| C  | 3.3741835  | -1.7783653 | -0.5972934 |
| H  | 4.1582931  | -1.5192688 | 1.5426348  |
| C  | 3.1976989  | 0.2240795  | 0.5890373  |
| C  | 3.1448026  | 1.4089120  | 1.4710163  |
| C  | 2.5633554  | 0.3311624  | -0.7558613 |
| O  | 2.7160422  | -0.8241119 | -1.4493670 |
| O  | 1.9247739  | 1.2888305  | -1.1874880 |
| H  | 2.6961836  | -2.6547251 | -0.4833741 |
| H  | 3.2501150  | 1.1537771  | 2.5424475  |

16<sub>2</sub>; COSMO

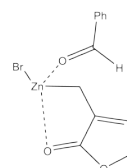

Energy (Hartree) = -5040.680639077

|    |            |            |            |
|----|------------|------------|------------|
| C  | -4.5840775 | 1.2301712  | 1.0885064  |
| C  | -3.4463380 | 1.3635231  | 0.2822137  |
| C  | -2.6322049 | 0.2381817  | 0.0185481  |
| C  | -2.9654008 | -1.0227970 | 0.5690172  |
| C  | -4.1012865 | -1.1505347 | 1.3728090  |
| C  | -4.9096111 | -0.0251002 | 1.6320369  |
| H  | -5.2201055 | 2.1036840  | 1.2959294  |
| H  | -3.1773126 | 2.3402188  | -0.1508070 |
| C  | -1.4465375 | 0.4000888  | -0.8252420 |
| H  | -2.3157643 | -1.8836124 | 0.3501668  |
| H  | -4.3659779 | -2.1279178 | 1.8038520  |
| H  | -5.8036702 | -0.1302221 | 2.2660252  |
| O  | -0.6786472 | -0.5306121 | -1.1138880 |
| H  | -1.2482247 | 1.4270388  | -1.2288274 |
| H  | 5.1872420  | 0.0152320  | 1.9059005  |
| Br | 0.3988539  | 1.5532842  | -3.6666585 |
| H  | 1.9795673  | -2.1262602 | -1.0014282 |
| Zn | 1.1636821  | -0.0455514 | -2.1284988 |
| C  | 4.6855982  | -0.6891367 | -0.1054626 |
| C  | 4.9285386  | 0.3990031  | 0.8939657  |
| H  | 5.4494718  | -1.4287905 | -0.3836817 |
| C  | 3.4088453  | -0.6048128 | -0.5661801 |
| C  | 2.5739719  | -1.3514968 | -1.5379173 |
| C  | 2.8161010  | 0.5873579  | 0.0985276  |
| O  | 3.6886406  | 1.1310913  | 0.9775278  |
| O  | 1.7099048  | 1.0800428  | -0.1322009 |
| H  | 5.7254639  | 1.1152778  | 0.5932980  |
| H  | 3.1793772  | -1.8671510 | -2.3075318 |

16<sub>2</sub>

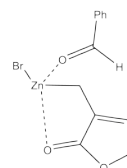

Energy (Hartree) = -5040.670706369

|    |            |            |            |
|----|------------|------------|------------|
| C  | -4.6094239 | 1.2181169  | 1.0454013  |
| C  | -3.4763954 | 1.3513051  | 0.2325506  |
| C  | -2.6331735 | 0.2402461  | 0.0085982  |
| C  | -2.9324311 | -1.0066671 | 0.6059015  |
| C  | -4.0631832 | -1.1350583 | 1.4166838  |
| C  | -4.9008997 | -0.0235556 | 1.6359216  |
| H  | -5.2682764 | 2.0815576  | 1.2215319  |
| H  | -3.2331730 | 2.3178071  | -0.2372325 |
| C  | -1.4496446 | 0.3991267  | -0.8441698 |
| H  | -2.2577283 | -1.8547900 | 0.4150438  |
| H  | -4.3008942 | -2.1024845 | 1.8845087  |
| H  | -5.7910155 | -0.1286181 | 2.2754588  |
| O  | -0.6652600 | -0.5243544 | -1.0997276 |
| H  | -1.2710869 | 1.4144934  | -1.2872314 |
| H  | 5.2114881  | -0.0438619 | 1.8998895  |
| Br | 0.3833362  | 1.6084727  | -3.6275023 |
| H  | 1.9425790  | -2.0873615 | -1.0228499 |
| Zn | 1.1820600  | 0.0133375  | -2.1313768 |
| C  | 4.6891363  | -0.6947202 | -0.1262012 |
| C  | 4.9331241  | 0.3673040  | 0.9032270  |
| H  | 5.4543090  | -1.4201769 | -0.4359738 |
| C  | 3.4062258  | -0.6087322 | -0.5679681 |
| C  | 2.5644650  | -1.3281972 | -1.5501343 |
| C  | 2.8109087  | 0.5619020  | 0.1376947  |
| O  | 3.6910074  | 1.0832822  | 1.0262544  |
| O  | 1.7037280  | 1.0540009  | -0.0730355 |
| H  | 5.7199811  | 1.1008377  | 0.6150258  |
| H  | 3.1603369  | -1.8530121 | -2.3202884 |

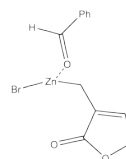

Energy (Hartree) = -5040.670286015

|    |            |           |            |
|----|------------|-----------|------------|
| C  | 0.9513539  | 0.5843262 | -5.0197904 |
| C  | -0.1584642 | 0.6265256 | -4.1693660 |
| C  | 0.0288207  | 0.5724420 | -2.7677093 |
| C  | 1.3324486  | 0.4633465 | -2.2342727 |
| C  | 2.4396526  | 0.4368172 | -3.0895368 |
| C  | 2.2492002  | 0.4970995 | -4.4809800 |
| H  | 0.8050114  | 0.6133911 | -6.1100775 |
| H  | -1.1778129 | 0.6655835 | -4.5902525 |
| C  | -1.1068085 | 0.6843900 | -1.8416864 |
| H  | 1.4687636  | 0.4455937 | -1.1420477 |
| H  | 3.4560054  | 0.3757334 | -2.6730891 |
| H  | 3.1202869  | 0.4697092 | -5.1540083 |
| O  | -2.2518387 | 1.0377992 | -2.1524394 |
| H  | -0.8996873 | 0.4157073 | -0.7747525 |
| H  | 1.9026735  | 3.6411066 | -4.6389605 |
| Br | -3.9824028 | 1.1166635 | -5.2577940 |
| H  | -2.7880491 | 4.9472258 | -3.6316487 |
| Zn | -2.9432019 | 2.3882188 | -3.6338962 |
| C  | -0.0202345 | 4.6192792 | -4.2728298 |
| C  | 1.4185690  | 4.3679650 | -3.9451578 |
| H  | -0.3559425 | 5.0545174 | -5.2245883 |
| C  | -0.8020192 | 4.2110829 | -3.2361885 |
| C  | -2.2647645 | 4.1692968 | -3.0423479 |
| C  | 0.1257357  | 3.6893813 | -2.1833786 |
| O  | 1.4197975  | 3.8024748 | -2.6311576 |
| O  | -0.1378263 | 3.2035652 | -1.0983962 |
| H  | 2.0436660  | 5.2902492 | -3.9400686 |
| H  | -2.5155834 | 4.2741837 | -1.9673554 |

### 16<sub>3</sub>; COSMO

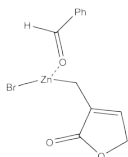

Energy (Hartree) = -5040.6807109

|    |            |           |            |
|----|------------|-----------|------------|
| C  | 0.9661327  | 0.6950790 | -5.0052700 |
| C  | -0.1464098 | 0.7077842 | -4.1580257 |
| C  | 0.0317666  | 0.5683911 | -2.7606248 |
| C  | 1.3310840  | 0.4031474 | -2.2290998 |
| C  | 2.4423471  | 0.4075974 | -3.0798861 |
| C  | 2.2598719  | 0.5539754 | -4.4662841 |
| H  | 0.8275486  | 0.7910703 | -6.0926075 |
| H  | -1.1619593 | 0.7850234 | -4.5816998 |
| C  | -1.1000367 | 0.6432240 | -1.8307372 |
| H  | 1.4614030  | 0.3070356 | -1.1400376 |
| H  | 3.4552313  | 0.3000193 | -2.6643371 |
| H  | 3.1335429  | 0.5516254 | -5.1363457 |
| O  | -2.2455713 | 1.0216149 | -2.1172913 |
| H  | -0.8929745 | 0.3219141 | -0.7790231 |
| H  | 1.9182402  | 3.5969750 | -4.6302863 |
| Br | -4.0815460 | 1.0452224 | -5.1236398 |
| H  | -2.7783924 | 4.9201450 | -3.7308525 |
| Zn | -2.9747288 | 2.3720347 | -3.5646960 |
| C  | -0.0056801 | 4.5856629 | -4.3066406 |
| C  | 1.4278095  | 4.3390463 | -3.9586042 |
| H  | -0.3281356 | 5.0007379 | -5.2718950 |
| C  | -0.8004180 | 4.2036469 | -3.2694558 |
| C  | -2.2656604 | 4.1752568 | -3.0914882 |
| C  | 0.1127369  | 3.7059098 | -2.1955999 |
| O  | 1.4110761  | 3.8008140 | -2.6303604 |
| O  | -0.1633142 | 3.2547559 | -1.0967277 |
| H  | 2.0538782  | 5.2599259 | -3.9644483 |
| H  | -2.5304924 | 4.3460393 | -2.0278122 |

### 16<sub>4</sub>; COSMO

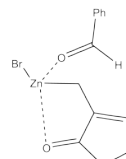

Energy (Hartree) = -5040.67800658

|    |            |            |            |
|----|------------|------------|------------|
| C  | 0.1991757  | -0.6602381 | -5.8775010 |
| C  | -0.0581888 | -0.0299012 | -4.6563013 |
| C  | 0.9470257  | 0.0057670  | -3.6589074 |
| C  | 2.1995070  | -0.6081857 | -3.8999276 |
| C  | 2.4535532  | -1.2312752 | -5.1273840 |
| C  | 1.4532319  | -1.2549901 | -6.1159941 |
| H  | -0.5845344 | -0.6961637 | -6.6490125 |
| H  | -1.0508970 | 0.4048703  | -4.4565278 |
| C  | 0.7364304  | 0.6689619  | -2.3676434 |
| H  | 2.9734093  | -0.5854945 | -3.1157115 |
| H  | 3.4293039  | -1.7031381 | -5.3168726 |
| H  | 1.6494012  | -1.7487618 | -7.0803484 |
| O  | -0.2401408 | 1.3538291  | -2.0417846 |
| H  | 1.5642327  | 0.5331031  | -1.6208965 |
| H  | 1.8309512  | 5.2637503  | -0.2645853 |
| Br | -3.5842944 | 0.9993775  | -3.3089997 |
| H  | -0.0134614 | 3.8447818  | -4.5770356 |
| Zn | -1.8052225 | 2.4892513  | -3.0330053 |
| C  | 0.9483335  | 5.3826233  | -2.2754960 |
| C  | 0.9609892  | 5.6928493  | -0.8100295 |
| H  | 1.7312783  | 5.7243529  | -2.9669144 |

### 16<sub>3</sub>

|   |            |           |            |
|---|------------|-----------|------------|
| C | -0.1652929 | 4.6607818 | -2.5747465 |
| C | -0.7571948 | 4.0424239 | -3.7816267 |
| C | -0.8658991 | 4.4426438 | -1.2803804 |
| O | -0.2326053 | 5.0832457 | -0.2745576 |
| O | -1.8566499 | 3.7298267 | -1.1002296 |
| H | 0.9344060  | 6.7837555 | -0.5927314 |
| H | -1.5446511 | 4.7065371 | -4.2042227 |

16<sub>4</sub>

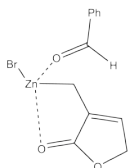

Energy (Hartree) = -5040.668302984

|    |            |            |            |
|----|------------|------------|------------|
| C  | 0.1457748  | -0.8646882 | -5.8232441 |
| C  | -0.0611477 | -0.1241166 | -4.6553790 |
| C  | 0.9966494  | 0.0257075  | -3.7260680 |
| C  | 2.2490805  | -0.5822508 | -3.9790836 |
| C  | 2.4510985  | -1.3159674 | -5.1534507 |
| C  | 1.3983460  | -1.4552382 | -6.0756129 |
| H  | -0.6792456 | -0.9887305 | -6.5407370 |
| H  | -1.0510336 | 0.3134589  | -4.4418093 |
| C  | 0.8336671  | 0.8051104  | -2.4924458 |
| H  | 3.0644972  | -0.4683409 | -3.2461376 |
| H  | 3.4266454  | -1.7841861 | -5.3530847 |
| H  | 1.5538648  | -2.0361386 | -6.9980169 |
| O  | -0.1459844 | 1.4841260  | -2.1750379 |
| H  | 1.7107982  | 0.7675796  | -1.7881195 |
| H  | 1.7793880  | 5.2022184  | -0.1556412 |
| Br | -3.5213380 | 1.0700292  | -3.5307308 |
| H  | -0.0076650 | 4.0447124  | -4.5789216 |
| Zn | -1.8030388 | 2.5783420  | -3.1273438 |
| C  | 0.9322389  | 5.4328792  | -2.1747361 |
| C  | 0.9191531  | 5.6625760  | -0.6926146 |
| H  | 1.7250675  | 5.8106069  | -2.8353841 |
| C  | -0.1783189 | 4.7335168  | -2.5307060 |
| C  | -0.7544143 | 4.1818341  | -3.7739726 |
| C  | -0.9015784 | 4.4448644  | -1.2595068 |
| O  | -0.2818921 | 5.0324745  | -0.2103267 |
| O  | -1.8917645 | 3.7249691  | -1.1367634 |
| H  | 0.8949417  | 6.7411201  | -0.4170716 |
| H  | -1.5515930 | 4.8581158  | -4.1574277 |

16<sub>5</sub>; COSMO

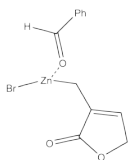

Energy (Hartree) = -5040.679400098

|   |            |            |            |
|---|------------|------------|------------|
| C | -4.4379384 | -0.5546414 | -0.7099969 |
| C | -3.5082885 | 0.4921417  | -0.7221717 |
| C | -2.1939332 | 0.2731318  | -0.2461447 |
| C | -1.8186815 | -0.9963557 | 0.2632915  |
| C | -2.7569851 | -2.0322459 | 0.2798041  |
| C | -4.0604154 | -1.8143667 | -0.2104546 |
| H | -5.4594089 | -0.3923845 | -1.0853160 |
| H | -3.7888069 | 1.4862386  | -1.1056848 |
| C | -1.2319158 | 1.3719426  | -0.2768109 |

|    |            |            |            |
|----|------------|------------|------------|
| H  | -0.8013347 | -1.1370890 | 0.6635767  |
| H  | -2.4785361 | -3.0184427 | 0.6808811  |
| H  | -4.7929379 | -2.6363926 | -0.1959689 |
| O  | -0.0320520 | 1.2227385  | 0.0037937  |
| H  | -1.6110381 | 2.3888666  | -0.5615511 |
| H  | 2.9581830  | -1.5946939 | -1.8497366 |
| Br | 0.3012525  | 4.6663309  | -0.1946501 |
| H  | 2.7660360  | 1.6067659  | 2.2737287  |
| Zn | 1.4005839  | 2.7147956  | 0.4542130  |
| C  | 3.7699994  | -0.0609705 | -0.5151065 |
| C  | 3.3715149  | -1.4700682 | -0.8222629 |
| H  | 4.5404753  | 0.4833558  | -1.0794036 |
| C  | 3.0318589  | 0.4061343  | 0.5284076  |
| C  | 2.9630587  | 1.7234688  | 1.1875086  |
| C  | 2.1269788  | -0.7105675 | 0.9451018  |
| O  | 2.3489770  | -1.7938259 | 0.1268695  |
| O  | 1.3015123  | -0.7424520 | 1.8393606  |
| H  | 4.2061512  | -2.2000276 | -0.7138270 |
| H  | 3.8856907  | 2.3185131  | 1.0422492  |

16<sub>5</sub>

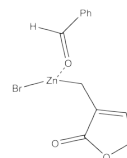

Energy (Hartree) = -5040.668125526

|    |            |            |            |
|----|------------|------------|------------|
| C  | -4.4585288 | -0.5368715 | -0.6598792 |
| C  | -3.5216799 | 0.5022069  | -0.6961069 |
| C  | -2.1960176 | 0.2727123  | -0.2586674 |
| C  | -1.8161546 | -0.9990317 | 0.2408400  |
| C  | -2.7629778 | -2.0266379 | 0.2828161  |
| C  | -4.0767929 | -1.7995310 | -0.1718142 |
| H  | -5.4888300 | -0.3664529 | -1.0063811 |
| H  | -3.8051304 | 1.4993801  | -1.0697759 |
| C  | -1.2264752 | 1.3652027  | -0.3139159 |
| H  | -0.7908900 | -1.1465184 | 0.6191439  |
| H  | -2.4808982 | -3.0141017 | 0.6781561  |
| H  | -4.8152212 | -2.6157435 | -0.1372309 |
| O  | -0.0174050 | 1.2036954  | -0.0897477 |
| H  | -1.6072835 | 2.3922675  | -0.5621593 |
| H  | 3.0683840  | -1.5774421 | -1.8681890 |
| Br | 0.2921128  | 4.6347032  | -0.2449806 |
| H  | 2.6771235  | 1.5747102  | 2.2746892  |
| Zn | 1.3987408  | 2.7130964  | 0.4155513  |
| C  | 3.8135146  | -0.0545120 | -0.4821152 |
| C  | 3.4307096  | -1.4624463 | -0.8198170 |
| H  | 4.6086573  | 0.4970939  | -1.0035042 |
| C  | 3.0273481  | 0.3997684  | 0.5301728  |
| C  | 2.9254473  | 1.7087677  | 1.2010120  |
| C  | 2.1032477  | -0.7226598 | 0.8936760  |
| O  | 2.3673161  | -1.7976019 | 0.0736567  |
| O  | 1.2363283  | -0.7590296 | 1.7441308  |
| H  | 4.2621893  | -2.1917713 | -0.6805144 |
| H  | 3.8531657  | 2.3066469  | 1.1106536  |

## 4.2 Product Complexes 17

$p_{unc.} = 17_1$ ; COSMO

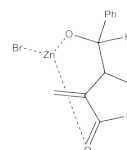

Energy (Hartree) = -5040.677055639

|    |            |            |            |
|----|------------|------------|------------|
| C  | -1.8519734 | 12.5797814 | 84.8459298 |
| C  | -0.1689019 | 8.7216099  | 85.9347178 |
| C  | -1.6982871 | 11.5687920 | 83.8796660 |
| C  | -0.8830872 | 11.1061097 | 86.5231661 |
| C  | -0.7421456 | 10.0846460 | 85.5649200 |
| C  | -1.4397442 | 12.3472038 | 86.1673663 |
| C  | -1.1460389 | 10.3307697 | 84.2371638 |
| O  | 0.6965430  | 8.2818959  | 84.9585031 |
| H  | -2.2843843 | 13.5523942 | 84.5646923 |
| H  | -0.5371482 | 10.9370633 | 87.5561036 |
| H  | -2.0070187 | 11.7509796 | 82.8384540 |
| H  | -1.5415136 | 13.1385785 | 86.9260212 |
| H  | -0.9994749 | 9.5412524  | 83.4839829 |
| Br | 3.1207399  | 5.0908195  | 84.7162082 |
| Zn | 1.4573971  | 6.6037171  | 85.0480153 |
| H  | -2.0578317 | 9.0369395  | 87.8149777 |
| C  | -1.4112358 | 7.7022436  | 86.1507193 |
| C  | -2.1427035 | 7.9880356  | 87.4734563 |
| C  | -0.9145667 | 6.3262450  | 86.3817459 |
| C  | -0.4949787 | 5.3850195  | 85.4847283 |
| C  | -0.8332780 | 6.1221709  | 87.8699732 |
| O  | -1.5083666 | 7.1471460  | 88.4666133 |
| O  | -0.2894698 | 5.2317364  | 88.4860372 |
| H  | -3.2173682 | 7.7183162  | 87.4169903 |
| H  | 0.3143174  | 8.8067552  | 86.9432003 |
| H  | -2.0577899 | 7.7960840  | 85.2575103 |
| H  | -0.1239137 | 4.4128987  | 85.8488558 |
| H  | -0.7213095 | 5.4877378  | 84.4096764 |

$P_{unc.} = 17_1$

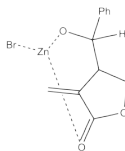

Energy (Hartree) = -5040.664085634

|    |            |            |            |
|----|------------|------------|------------|
| C  | -1.8488065 | 12.5746678 | 84.8421069 |
| C  | -0.1711064 | 8.7182976  | 85.9366962 |
| C  | -1.6826672 | 11.5673917 | 83.8749706 |
| C  | -0.8918789 | 11.1002127 | 86.5235660 |
| C  | -0.7405490 | 10.0815750 | 85.5645243 |
| C  | -1.4478530 | 12.3403977 | 86.1660055 |
| C  | -1.1305553 | 10.3304174 | 84.2337910 |
| O  | 0.6910092  | 8.2714131  | 84.9640068 |
| H  | -2.2805929 | 13.5469513 | 84.5592936 |
| H  | -0.5512128 | 10.9306099 | 87.5582541 |
| H  | -1.9799325 | 11.7525764 | 82.8310726 |
| H  | -1.5568078 | 13.1302891 | 86.9250268 |
| H  | -0.9683967 | 9.5440736  | 83.4807478 |
| Br | 3.1301288  | 5.1337196  | 84.6757153 |
| Zn | 1.4496671  | 6.5958235  | 85.0475688 |
| H  | -2.0599003 | 9.0397562  | 87.8173405 |
| C  | -1.4199100 | 7.7012338  | 86.1560865 |
| C  | -2.1424906 | 7.9876071  | 87.4843152 |
| C  | -0.9252061 | 6.3258034  | 86.3842587 |
| C  | -0.5043947 | 5.3854264  | 85.4859144 |
| C  | -0.8289252 | 6.1238424  | 87.8744413 |
| O  | -1.5008541 | 7.1548219  | 88.4732763 |
| O  | -0.2778075 | 5.2363741  | 88.4823380 |
| H  | -3.2184591 | 7.7177911  | 87.4334506 |
| H  | 0.3100773  | 8.8033787  | 86.9466956 |
| H  | -2.0671035 | 7.8039835  | 85.2641235 |
| H  | -0.1284586 | 4.4155700  | 85.8514486 |
| H  | -0.7405465 | 5.4829362  | 84.4123589 |

## 4.3 Transition States for Product Formation

$TS_{unc.} = TS_1$ ; COSMO

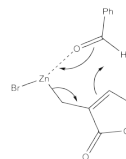

Energy (Hartree) = -5040.667677945

|    |            |            |            |
|----|------------|------------|------------|
| C  | -3.9123478 | -0.9831607 | -0.0128733 |
| C  | 0.2301636  | -0.2383125 | 0.9157487  |
| C  | -3.5073759 | 0.2841525  | 0.4483208  |
| C  | -1.6159718 | -1.7704807 | 0.1432198  |
| C  | -1.2019934 | -0.4974764 | 0.5901214  |
| C  | -2.9659813 | -2.0107009 | -0.1583320 |
| C  | -2.1622191 | 0.5258429  | 0.7512320  |
| O  | 0.4947138  | 0.6788624  | 1.7897986  |
| H  | -4.9710117 | -1.1715412 | -0.2484685 |
| H  | -0.8805689 | -2.5868584 | 0.0589778  |
| H  | -4.2508932 | 1.0858290  | 0.5769767  |
| H  | -3.2815302 | -3.0086992 | -0.4989542 |
| H  | -1.8306560 | 1.5059390  | 1.1265051  |
| Br | 3.3419832  | 2.1531319  | 3.9024635  |
| Zn | 2.1721024  | 1.5955439  | 2.0197548  |
| H  | 0.4610995  | -1.6489703 | -1.5540794 |
| H  | 1.8602312  | 3.0206697  | -0.0650953 |
| C  | 0.8687768  | 0.4502071  | -0.9682523 |
| C  | 1.0994794  | -0.7797851 | -1.8142268 |
| H  | 0.0018139  | 1.1005080  | -1.1529538 |
| C  | 2.1429482  | 0.9599787  | -0.6481141 |
| C  | 2.5282232  | 2.1442778  | 0.0105465  |
| C  | 3.1338382  | -0.1353892 | -0.9428985 |
| O  | 2.4741812  | -1.1455656 | -1.5895439 |
| O  | 4.3177184  | -0.1765849 | -0.6853934 |
| H  | 0.9562276  | -0.5698706 | -2.8970674 |
| H  | 0.8856258  | -1.1422795 | 0.8745130  |
| H  | 3.6116930  | 2.3607015  | 0.0280273  |

$TS_{unc.} = TS_1$

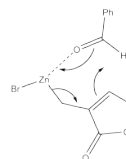

Energy (Hartree) = -5040.655950981  
number of imaginary frequencies: 1

|   |            |            |            |
|---|------------|------------|------------|
| C | -3.9131672 | -0.9770090 | -0.0110805 |
| C | 0.2340508  | -0.2403647 | 0.9055620  |
| C | -3.5039716 | 0.2871030  | 0.4530902  |
| C | -1.6192245 | -1.7693169 | 0.1372436  |
| C | -1.2004540 | -0.4991457 | 0.5859969  |
| C | -2.9700120 | -2.0058409 | -0.1616226 |
| C | -2.1579936 | 0.5246856  | 0.7535688  |
| O | 0.4999072  | 0.6741068  | 1.7819605  |
| H | -4.9727297 | -1.1621585 | -0.2446907 |
| H | -0.8862233 | -2.5878410 | 0.0514688  |
| H | -4.2453119 | 1.0898861  | 0.5866936  |
| H | -3.2888752 | -3.0022933 | -0.5034282 |
| H | -1.8223349 | 1.5008547  | 1.1349825  |

|    |            |            |            |
|----|------------|------------|------------|
| Br | 3.3283027  | 2.1548864  | 3.8972261  |
| Zn | 2.1731287  | 1.5940398  | 2.0210800  |
| H  | 0.4704343  | -1.6574058 | -1.5472116 |
| H  | 1.8514565  | 3.0213064  | -0.0686061 |
| C  | 0.8671812  | 0.4434078  | -0.9625753 |
| C  | 1.1070326  | -0.7868009 | -1.8087172 |
| H  | -0.0015548 | 1.0900982  | -1.1527539 |
| C  | 2.1403538  | 0.9609556  | -0.6473008 |
| C  | 2.5216473  | 2.1465697  | 0.0089553  |
| C  | 3.1402756  | -0.1300705 | -0.9417157 |
| O  | 2.4799755  | -1.1459589 | -1.5874280 |
| O  | 4.3207622  | -0.1606264 | -0.6828916 |
| H  | 0.9582622  | -0.5788963 | -2.8920769 |
| H  | 0.8847404  | -1.1491636 | 0.8677590  |
| H  | 3.6046120  | 2.3649615  | 0.0264648  |

---

## 5 Preactivation of Catalyst

### 5.1 Educt Complexes and Intermediates

$C_{ed}$

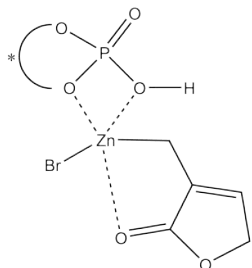

Energy (Hartree) = -7273.209167832

|   |            |            |            |
|---|------------|------------|------------|
| C | -0.2797519 | 0.9072997  | 29.1683284 |
| C | 0.6305378  | -0.0456053 | 29.6199214 |
| C | 0.2480502  | -0.8646554 | 30.7449093 |
| C | 1.1472341  | -1.7607576 | 31.3947648 |
| C | -1.0899223 | -0.7408052 | 31.2710634 |
| C | -1.4912044 | -1.5707087 | 32.3600854 |
| C | -1.9642131 | 0.2565451  | 30.7528776 |
| H | -2.9633901 | 0.3670094  | 31.1992100 |
| C | -1.5654073 | 1.1300858  | 29.7496857 |
| C | 4.1623758  | 0.9715244  | 28.5200851 |
| C | 4.6826604  | -0.2593964 | 28.1334880 |
| H | 5.7446869  | -0.3218694 | 27.8507803 |
| C | 3.8834343  | -1.4342874 | 28.0701364 |
| C | 4.4131551  | -2.6681335 | 27.5868128 |
| C | 2.5076158  | -1.3755019 | 28.4973864 |
| C | 1.7093813  | -2.5524343 | 28.3698571 |
| C | 1.9811074  | -0.1308842 | 28.9996913 |
| C | 2.7908248  | 1.0114455  | 28.9093068 |
| O | 0.0646796  | 1.6945753  | 28.0658463 |
| O | 2.2659870  | 2.2590302  | 29.2630450 |
| P | 1.1164075  | 2.9324259  | 28.2770445 |
| O | 0.4424434  | 3.9140635  | 29.3843047 |
| H | -0.5499552 | 3.8432075  | 29.4032903 |
| O | 1.5578585  | 3.5290476  | 26.9921797 |
| C | -0.6028914 | -2.4604307 | 32.9430776 |
| C | 0.7317077  | -2.5394136 | 32.4652537 |
| H | -2.5182873 | -1.4714086 | 32.7450065 |
| H | -0.9217469 | -3.0875531 | 33.7894131 |
| H | 2.1884402  | -1.8180663 | 31.0509761 |
| H | 1.4481847  | -3.2161992 | 32.9551159 |
| C | 2.2497494  | -3.7326414 | 27.8799533 |
| C | 3.6160629  | -3.7984525 | 27.4964971 |
| H | 0.6489969  | -2.5118661 | 28.6552672 |
| H | 1.6115740  | -4.6241344 | 27.7827646 |
| H | 4.0346211  | -4.7427064 | 27.1163183 |
| H | 5.4687063  | -2.6996923 | 27.2742158 |
| C | -2.4689001 | 3.4450825  | 30.2270574 |
| C | -2.3528957 | 2.3334828  | 29.3313489 |
| C | -3.1193895 | 4.6106541  | 29.7667762 |
| C | -2.9008234 | 2.4176867  | 28.0195477 |
| C | -3.5484166 | 3.6006171  | 27.6259284 |
| C | -3.6619353 | 4.7146645  | 28.4763441 |
| H | -3.2051280 | 5.4737811  | 30.4453310 |
| C | -2.8408478 | 1.2441369  | 27.0453403 |
| H | -3.9706604 | 3.6564401  | 26.6100905 |
| C | -2.2171413 | 1.6333343  | 25.6939366 |
| H | -2.1075389 | 0.7382058  | 25.0481020 |
| H | -1.2140712 | 2.0819142  | 25.8312753 |
| H | -2.8494818 | 2.3598543  | 25.1420693 |
| C | -4.2381680 | 0.6193141  | 26.8706864 |
| H | -2.1931648 | 0.4655911  | 27.4964763 |
| H | -4.1920738 | -0.2646848 | 26.2016869 |
| H | -4.9506655 | 1.3438408  | 26.4234238 |
| H | -4.6584703 | 0.2930210  | 27.8435259 |
| C | -4.3308128 | 6.0004880  | 28.0090358 |
| C | -3.5267564 | 6.6653465  | 26.8764837 |
| H | -2.4793636 | 6.8579929  | 27.1841609 |
| H | -3.9837810 | 7.6323847  | 26.5814194 |
| H | -3.4959728 | 6.0195689  | 25.9741155 |
| C | -5.7962558 | 5.7708308  | 27.5998616 |
| H | -4.3292214 | 6.6969830  | 28.8762379 |
| H | -5.8703122 | 5.0960606  | 26.7215656 |
| H | -6.2822646 | 6.7288981  | 27.3229428 |
| H | -6.3795957 | 5.3138183  | 28.4242504 |
| C | -1.9553040 | 3.3993185  | 31.6690074 |
| C | -1.2759010 | 4.6976490  | 32.1342539 |
| H | -0.7987477 | 4.5450353  | 33.1214387 |
| H | -1.9942014 | 5.5372349  | 32.2395715 |
| H | -0.4743642 | 5.0278644  | 31.4446327 |
| C | -3.0998213 | 3.0340453  | 32.6349564 |
| H | -1.1904127 | 2.5980563  | 31.7345801 |
| H | -3.5951294 | 2.0833712  | 32.3562853 |
| H | -3.8792618 | 3.8248199  | 32.6389918 |
| H | -2.7121125 | 2.9280568  | 33.6686104 |
| H | 8.0836103  | 5.7474552  | 27.5353064 |
| H | 7.1678332  | 0.8607887  | 31.3767497 |
| H | 6.6199702  | 2.1733203  | 24.9433443 |
| C | 7.9636911  | 5.4194957  | 28.5913219 |
| H | 4.8762770  | 3.7789426  | 32.2015740 |
| H | 6.5356232  | 7.0293701  | 29.0248369 |
| H | 3.5301651  | 4.2903910  | 25.8071976 |
| C | 6.9183176  | 4.3104366  | 28.5907275 |
| C | 6.0869813  | 0.6179352  | 31.3043263 |
| C | 7.5038082  | 6.6426705  | 29.4032322 |
| H | 8.2493800  | 7.4627624  | 29.3463224 |
| C | 6.5468422  | 3.6550722  | 29.7805246 |
| C | 5.6956463  | 1.6075016  | 25.1853179 |
| H | 9.2851414  | 4.5771664  | 30.1352931 |
| C | 6.2973865  | 3.9122609  | 27.3981036 |
| C | 9.3322267  | 4.9095151  | 29.0771365 |
| H | 9.6776840  | 4.0476652  | 28.4718030 |
| H | 6.5597212  | 4.4370525  | 26.4656146 |
| C | 5.3787601  | 2.8007042  | 32.3476873 |
| H | 5.7863182  | 0.1004542  | 32.2385104 |
| H | 5.9539228  | -0.0918856 | 30.4651446 |
| C | 5.6160316  | 2.6018608  | 29.7946016 |
| C | 4.2362538  | 3.6826433  | 25.2113082 |
| C | 5.3572610  | 2.8638591  | 27.3532050 |
| H | 5.2249569  | 1.3004427  | 24.2284671 |
| H | 5.9990954  | 0.6883148  | 25.7248711 |
| C | 5.2578103  | 1.9020933  | 31.1067326 |
| C | 5.0425423  | 2.1844849  | 28.5583322 |
| C | 4.7275433  | 2.4694129  | 26.0179863 |
| H | 6.4370447  | 3.0060069  | 32.6128048 |
| H | 5.0750596  | 4.3257085  | 24.8719182 |
| H | 4.9051801  | 2.3060690  | 33.2187453 |
| H | 7.3733676  | 6.3827865  | 30.4748122 |
| H | 3.6986777  | 3.3401342  | 24.3036261 |
| H | 10.1002766 | 5.7079119  | 29.0116829 |
| H | 4.1898955  | 1.5996509  | 31.0395013 |
| H | 3.8324050  | 1.8542143  | 26.2453824 |
| H | 7.0011980  | 3.9734719  | 30.7307139 |
| C | 4.4449525  | 7.2224443  | 31.6900225 |
| C | 3.4776145  | 6.2801878  | 31.5388968 |
| C | 2.6395137  | 6.3501200  | 32.7693994 |
| O | 3.0607774  | 7.3574402  | 33.5747776 |
| C | 4.2282290  | 7.9517224  | 32.9815245 |
| O | 1.7269129  | 5.5868119  | 33.0724584 |
| C | 3.1359217  | 5.2582241  | 30.5268770 |
| H | 3.9966729  | 4.9518168  | 29.9025938 |

|    |           |           |            |
|----|-----------|-----------|------------|
| H  | 5.2623406 | 7.4532518 | 30.9945094 |
| H  | 5.0698912 | 7.8442102 | 33.7028320 |
| H  | 4.0469999 | 9.0416105 | 32.8432993 |
| Zn | 2.2011255 | 3.7833009 | 31.4969219 |
| H  | 2.3388146 | 5.6413500 | 29.8516957 |
| Br | 1.5289209 | 1.9038601 | 32.6600798 |

$D_{ed}$

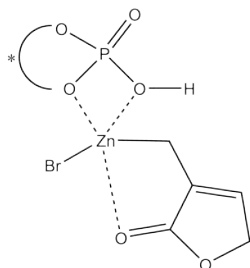

Energy (Hartree) = -7273.20909789

|   |            |            |            |
|---|------------|------------|------------|
| C | -0.1332164 | 0.8684980  | 29.1519075 |
| C | 0.7249723  | -0.1623019 | 29.5286616 |
| C | 0.3293977  | -0.9992813 | 30.6358884 |
| C | 1.1883014  | -1.9799969 | 31.2140897 |
| C | -0.9756870 | -0.8064902 | 31.2206019 |
| C | -1.3919376 | -1.6510443 | 32.2926136 |
| C | -1.7972401 | 0.2689045  | 30.7777435 |
| H | -2.7684067 | 0.4289141  | 31.2686173 |
| C | -1.3768753 | 1.1542874  | 29.7939356 |
| C | 4.2754859  | 0.6575676  | 28.3281175 |
| C | 4.6948114  | -0.5889905 | 27.8748504 |
| H | 5.7387268  | -0.7115865 | 27.5477402 |
| C | 3.8145165  | -1.7036242 | 27.7989972 |
| C | 4.2397195  | -2.9499907 | 27.2491528 |
| C | 2.4626588  | -1.5692795 | 28.2820966 |
| C | 1.5810504  | -2.6836082 | 28.1420027 |
| C | 2.0422240  | -0.3133143 | 28.8517722 |
| C | 2.9253850  | 0.7742279  | 28.7729903 |
| O | 0.2229834  | 1.6757696  | 28.0677234 |
| O | 2.5024307  | 2.0389862  | 29.1954465 |
| P | 1.3653178  | 2.8295902  | 28.2852144 |
| O | 0.8043305  | 3.8049526  | 29.4590191 |
| H | -0.1892713 | 3.8045111  | 29.5120877 |
| O | 1.7966944  | 3.4499172  | 27.0081941 |
| C | -0.5459160 | -2.6218816 | 32.8047599 |
| C | 0.7608660  | -2.7715351 | 32.2703351 |
| H | -2.3942447 | -1.4980312 | 32.7226266 |
| H | -0.8749699 | -3.2597245 | 33.6390930 |
| H | 2.2093039  | -2.0935289 | 30.8265203 |
| H | 1.4469544  | -3.5144438 | 32.7047501 |
| C | 2.0203839  | -3.8770111 | 27.5873176 |
| C | 3.3638484  | -4.0194293 | 27.1480485 |
| H | 0.5372153  | -2.5832609 | 28.4705228 |
| H | 1.3191383  | -4.7188475 | 27.4821906 |
| H | 3.7020589  | -4.9737836 | 26.7165828 |
| H | 5.2783782  | -3.0400674 | 26.8942424 |
| C | -2.0975612 | 3.5033735  | 30.3994624 |
| C | -2.0943903 | 2.4251656  | 29.4565913 |
| C | -2.6857523 | 4.7277662  | 30.0142545 |
| C | -2.6878706 | 2.6009346  | 28.1740023 |
| C | -3.2695175 | 3.8396302  | 27.8560483 |
| C | -3.2728274 | 4.9216289  | 28.7540461 |
| H | -2.6847426 | 5.5652620  | 30.7292783 |
| C | -2.7461325 | 1.4686303  | 27.1520455 |
| H | -3.7281890 | 3.9662670  | 26.8625751 |
| C | -2.1497811 | 1.8731135  | 25.7927856 |

|   |            |            |            |
|---|------------|------------|------------|
| H | -2.1263583 | 1.0012656  | 25.1074238 |
| H | -1.1139268 | 2.2476430  | 25.9066644 |
| H | -2.7518345 | 2.6631770  | 25.2972870 |
| C | -4.1885389 | 0.9462978  | 27.0105257 |
| H | -2.1361410 | 0.6301238  | 27.5443951 |
| H | -4.2287763 | 0.0908147  | 26.3050784 |
| H | -4.8669097 | 1.7351058  | 26.6229096 |
| H | -4.5920010 | 0.6070218  | 27.9860499 |
| C | -3.8744456 | 6.2664898  | 28.3685706 |
| C | -3.0828939 | 6.9228319  | 27.2224199 |
| H | -2.0114845 | 7.0345498  | 27.4838695 |
| H | -3.4879830 | 7.9285732  | 26.9869563 |
| H | -3.1386087 | 6.3137099  | 26.2960894 |
| C | -5.3700032 | 6.1493955  | 28.0257697 |
| H | -3.7847342 | 6.9258755  | 29.2598423 |
| H | -5.5310251 | 5.5164290  | 27.1282029 |
| H | -5.8034902 | 7.1473924  | 27.8092066 |
| H | -5.9423489 | 5.6985855  | 28.8612000 |
| C | -1.5294214 | 3.3633181  | 31.8146324 |
| C | -0.7450311 | 4.5933308  | 32.3002363 |
| H | -0.2395665 | 4.3683036  | 33.2590704 |
| H | -1.4000093 | 5.4732531  | 32.4696037 |
| H | 0.0477256  | 4.8989372  | 31.5894086 |
| C | -2.6551720 | 3.0350027  | 32.8152646 |
| H | -0.8188658 | 2.5110224  | 31.8153528 |
| H | -3.2253504 | 2.1319444  | 32.5220396 |
| H | -3.3777705 | 3.8751961  | 32.8845437 |
| H | -2.2329558 | 2.8603916  | 33.8258235 |
| H | 8.4623053  | 5.2079321  | 27.3677826 |
| H | 7.3787729  | 0.2312097  | 31.0481670 |
| H | 6.6711765  | 1.8340087  | 24.7046250 |
| C | 8.3657048  | 4.8415374  | 28.4134992 |
| H | 5.3206432  | 3.2541746  | 32.0853381 |
| H | 7.0683574  | 6.5196953  | 28.9804235 |
| H | 3.7683663  | 4.1189223  | 25.7679089 |
| C | 7.2495180  | 3.8037171  | 28.4137015 |
| C | 6.2820456  | 0.0624251  | 31.0122144 |
| C | 8.0244763  | 6.0545543  | 29.2961169 |
| H | 8.8198218  | 6.8263300  | 29.2380995 |
| C | 6.8816202  | 3.1253348  | 29.5916572 |
| C | 5.7194654  | 1.3229941  | 24.9619100 |
| H | 9.6915826  | 3.8449557  | 29.8586113 |
| C | 6.5585806  | 3.4953599  | 27.2329932 |
| C | 9.7162955  | 4.2218160  | 28.8146901 |
| H | 9.9770398  | 3.3678978  | 28.1579350 |
| H | 6.8193283  | 4.0395974  | 26.3113003 |
| C | 5.7622299  | 2.2400565  | 32.1704649 |
| H | 5.9849773  | -0.4735377 | 31.9370840 |
| H | 6.0686285  | -0.6010808 | 30.1520805 |
| C | 5.8845980  | 2.1345489  | 29.6033454 |
| C | 4.4080855  | 3.4887300  | 25.1224333 |
| C | 5.5499315  | 2.5128280  | 27.1864551 |
| H | 5.1933804  | 1.0871675  | 24.0137440 |
| H | 5.9781379  | 0.3644384  | 25.4541660 |
| C | 5.5326904  | 1.4047804  | 30.9008391 |
| C | 5.2371714  | 1.8066241  | 28.3766257 |
| C | 4.8448496  | 2.2145861  | 25.8639184 |
| H | 6.8415778  | 2.3644602  | 32.3983641 |
| H | 5.2758265  | 4.0865342  | 24.7732247 |
| H | 5.2918702  | 1.7402863  | 33.0403690 |
| H | 7.9250709  | 5.7562369  | 30.3609675 |
| H | 3.8146509  | 3.2189076  | 24.2251179 |
| H | 10.5328356 | 4.9705324  | 28.7488758 |
| H | 4.4452189  | 1.1749045  | 30.8668167 |
| H | 3.9188343  | 1.6522963  | 26.1043543 |
| H | 7.3924181  | 3.3741975  | 30.5339457 |
| C | 5.1201193  | 6.7162384  | 31.7541047 |
| C | 4.0787545  | 5.8568903  | 31.6012206 |
| C | 3.3018700  | 5.9216992  | 32.8716559 |
| O | 3.8328895  | 6.8503575  | 33.7064122 |
| C | 5.0151614  | 7.3887018  | 33.0895920 |



|    |           |           |            |
|----|-----------|-----------|------------|
| O  | 2.3480683 | 5.2122519 | 33.1782536 |
| C  | 3.6182111 | 4.9182568 | 30.5561088 |
| H  | 4.4255715 | 4.5855889 | 29.8763821 |
| H  | 5.9219811 | 6.9234688 | 31.0335251 |
| H  | 5.8767481 | 7.1810243 | 33.7639689 |
| H  | 4.9110908 | 8.4948076 | 33.0153473 |
| Zn | 2.6233905 | 3.4624995 | 31.4948091 |
| H  | 2.8219434 | 5.3926125 | 29.9402322 |
| Br | 1.8713455 | 1.5827299 | 32.6062054 |

$E_{ed} = G1_{ed}$ ; COSMO

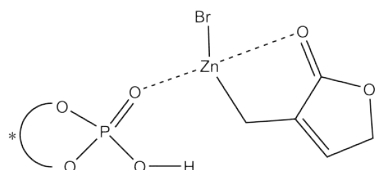

Energy (Hartree) = -7273.245179635

|   |            |            |            |
|---|------------|------------|------------|
| C | -0.3311631 | 1.0293047  | 29.5067841 |
| C | 0.5510937  | 0.0219979  | 29.8964382 |
| C | 0.1077031  | -0.8923423 | 30.9214368 |
| C | 0.9664285  | -1.8657846 | 31.5135400 |
| C | -1.2536257 | -0.7977003 | 31.3954463 |
| C | -1.7067398 | -1.7155739 | 32.3901195 |
| C | -2.1156767 | 0.2227789  | 30.8933992 |
| H | -3.1506705 | 0.2659213  | 31.2635915 |
| C | -1.6729598 | 1.1739823  | 29.9840201 |
| C | 4.0624550  | 1.0537267  | 28.7078439 |
| C | 4.5306446  | -0.1448829 | 28.1804630 |
| H | 5.5635927  | -0.1968277 | 27.8037807 |
| C | 3.7068565  | -1.3027213 | 28.0917206 |
| C | 4.1810741  | -2.4982204 | 27.4721384 |
| C | 2.3599668  | -1.2607086 | 28.6089608 |
| C | 1.5282727  | -2.4056827 | 28.4187059 |
| C | 1.8974834  | -0.0583664 | 29.2598181 |
| C | 2.7383082  | 1.0615787  | 29.2365902 |
| O | 0.1059476  | 1.9596998  | 28.5545226 |
| O | 2.3040030  | 2.2572215  | 29.8132060 |
| P | 1.1201264  | 3.1162327  | 29.0832822 |
| O | 0.4923023  | 3.8737428  | 30.3133581 |
| H | 0.4213506  | 4.9021828  | 30.1464766 |
| O | 1.5740694  | 3.9545291  | 27.9079638 |
| C | -0.8529554 | -2.6686415 | 32.9259178 |
| C | 0.4980008  | -2.7320878 | 32.4924336 |
| H | -2.7498239 | -1.6418868 | 32.7358781 |
| H | -1.2155453 | -3.3658161 | 33.6965443 |
| H | 2.0159928  | -1.9203541 | 31.1921628 |
| H | 1.1814469  | -3.4705707 | 32.9386697 |
| C | 2.0135680  | -3.5464957 | 27.7943826 |
| C | 3.3551239  | -3.6028224 | 27.3300658 |
| H | 0.4849787  | -2.3745792 | 28.7616804 |
| H | 1.3495340  | -4.4127699 | 27.6525828 |
| H | 3.7299324  | -4.5163379 | 26.8439259 |
| H | 5.2150893  | -2.5189603 | 27.0935859 |
| C | -2.6364893 | 3.5008758  | 30.2889158 |
| C | -2.4465188 | 2.3496328  | 29.4723838 |
| C | -3.0736843 | 4.6877774  | 29.6731037 |
| C | -2.7939296 | 2.3842045  | 28.0923964 |
| C | -3.2198240 | 3.5983059  | 27.5275623 |
| C | -3.3197992 | 4.7745121  | 28.2914411 |
| H | -3.1864665 | 5.5979465  | 30.2824277 |
| C | -2.7439001 | 1.1066410  | 27.2555357 |
| H | -3.4391301 | 3.6344491  | 26.4521819 |
| C | -2.5153230 | 1.3350043  | 25.7569501 |
| H | -2.3683138 | 0.3634331  | 25.2426752 |

|   |            |            |            |
|---|------------|------------|------------|
| H | -1.6233618 | 1.9667028  | 25.5743558 |
| H | -3.3851473 | 1.8276204  | 25.2738561 |
| C | -4.0194625 | 0.2763464  | 27.5069496 |
| H | -1.8886680 | 0.5005437  | 27.6218897 |
| H | -3.9853386 | -0.6809826 | 26.9462496 |
| H | -4.9200071 | 0.8355809  | 27.1769914 |
| H | -4.1447714 | 0.0404731  | 28.5832496 |
| C | -3.5731921 | 6.1369886  | 27.6577541 |
| C | -2.2179718 | 6.8065844  | 27.3403613 |
| H | -1.5651883 | 6.8544132  | 28.2353027 |
| H | -2.3604916 | 7.8376838  | 26.9541949 |
| H | -1.6789920 | 6.2259287  | 26.5602989 |
| C | -4.4687814 | 6.0976054  | 26.4123764 |
| H | -4.0810464 | 6.7612009  | 28.4269534 |
| H | -3.9679724 | 5.5786313  | 25.5687170 |
| H | -4.6990493 | 7.1263775  | 26.0681780 |
| H | -5.4279900 | 5.5783785  | 26.6124533 |
| C | -2.3900724 | 3.4649297  | 31.7967448 |
| C | -1.9073295 | 4.7946973  | 32.3983359 |
| H | -1.6215059 | 4.6468525  | 33.4595953 |
| H | -2.7032329 | 5.5681035  | 32.3845292 |
| H | -1.0292317 | 5.2040524  | 31.8645398 |
| C | -3.6665444 | 2.9996753  | 32.5289652 |
| H | -1.5957906 | 2.7111294  | 31.9810712 |
| H | -4.0311517 | 2.0242036  | 32.1523560 |
| H | -4.4856681 | 3.7348954  | 32.3831779 |
| H | -3.4849357 | 2.9016568  | 33.6196155 |
| H | 8.0633795  | 5.7539010  | 27.6440393 |
| H | 7.3585011  | 2.0171631  | 32.1658003 |
| H | 6.0300055  | 2.3622372  | 24.9696562 |
| C | 8.0317307  | 5.3571049  | 28.6826484 |
| H | 3.7344280  | 3.2886544  | 31.7884404 |
| H | 6.8264827  | 7.0741924  | 29.3532516 |
| H | 3.5329308  | 4.8300649  | 26.4021198 |
| C | 6.9178987  | 4.3166759  | 28.7229905 |
| C | 6.6013878  | 1.2539230  | 31.8893902 |
| C | 7.7622805  | 6.5450870  | 29.6234050 |
| H | 8.5895035  | 7.2825928  | 29.5732703 |
| C | 6.6196420  | 3.6097800  | 29.9029995 |
| C | 5.0716737  | 1.8984160  | 25.2847766 |
| H | 9.4424499  | 4.3139617  | 30.0102911 |
| C | 6.1572179  | 4.0264107  | 27.5779500 |
| C | 9.4006879  | 4.7157068  | 28.9762324 |
| H | 9.6090878  | 3.8772464  | 28.2816603 |
| H | 6.3500223  | 4.6023129  | 26.6588291 |
| C | 4.6536211  | 2.8630346  | 32.2378270 |
| H | 6.3358898  | 0.7020269  | 32.8144136 |
| H | 7.0818441  | 0.5403883  | 31.1895174 |
| C | 5.6489586  | 2.5906221  | 29.9399170 |
| C | 3.9105819  | 4.1173139  | 25.6396864 |
| C | 5.1651969  | 3.0254575  | 27.5649523 |
| H | 4.4505285  | 1.7474153  | 24.3780094 |
| H | 5.3017041  | 0.9014940  | 25.7088350 |
| C | 5.3494094  | 1.8918743  | 31.2637139 |
| C | 4.9516835  | 2.2622470  | 28.7450276 |
| C | 4.3392388  | 2.7950885  | 26.3001231 |
| H | 5.3247817  | 3.7045136  | 32.5116614 |
| H | 4.7495384  | 4.6170784  | 25.1126120 |
| H | 4.3686100  | 2.3422954  | 33.1753696 |
| H | 7.6735879  | 6.2147490  | 30.6795602 |
| H | 3.1118556  | 3.9353895  | 24.8918615 |
| H | 10.2162487 | 5.4609990  | 28.8731537 |
| H | 4.6368813  | 1.0677001  | 31.0554336 |
| H | 3.4099977  | 2.2719270  | 26.6081362 |
| H | 7.1707789  | 3.8475615  | 30.8271422 |
| C | 3.8571967  | 6.8317390  | 28.5265152 |
| C | 2.5189779  | 6.9227237  | 28.2648927 |
| C | 1.8419204  | 6.4670004  | 29.4963171 |
| O | 2.7391696  | 6.1359910  | 30.4473813 |
| C | 4.0653975  | 6.3094613  | 29.9084859 |
| O | 0.6240482  | 6.3058763  | 29.6798541 |

|    |            |           |            |
|----|------------|-----------|------------|
| C  | 1.7404847  | 7.1605333 | 27.0427771 |
| H  | 2.3375227  | 7.6155077 | 26.2294013 |
| H  | 4.6824278  | 7.0323491 | 27.8302826 |
| H  | 4.5733913  | 5.3183123 | 29.9235532 |
| H  | 4.6287646  | 6.9872636 | 30.5862071 |
| Zn | 1.0430515  | 5.3623163 | 26.4699239 |
| H  | 0.8402432  | 7.7780494 | 27.2389950 |
| Br | -0.0708101 | 4.2513527 | 24.7526105 |

|   |            |            |            |
|---|------------|------------|------------|
| H | -3.3396630 | 1.8330288  | 25.2553870 |
| C | -3.9954308 | 0.2792633  | 27.4814755 |
| H | -1.8657592 | 0.5042906  | 27.6162856 |
| H | -3.9572383 | -0.6766666 | 26.9186754 |
| H | -4.8931800 | 0.8392389  | 27.1458191 |
| H | -4.1304236 | 0.0408397  | 28.5559718 |
| C | -3.5738451 | 6.1362022  | 27.6488326 |
| C | -2.2227468 | 6.8301436  | 27.3691168 |
| H | -1.5898801 | 6.8789029  | 28.2782018 |
| H | -2.3729652 | 7.8628076  | 26.9901131 |
| H | -1.6603339 | 6.2664988  | 26.5932043 |
| C | -4.4361633 | 6.0909975  | 26.3805933 |
| H | -4.1115493 | 6.7464387  | 28.4092451 |
| H | -3.9027654 | 5.5897043  | 25.5464299 |
| H | -4.6772228 | 7.1179637  | 26.0385936 |
| H | -5.3900430 | 5.5520817  | 26.5510784 |
| C | -2.4145511 | 3.4614835  | 31.7916200 |
| C | -1.9362301 | 4.7899672  | 32.3993552 |
| H | -1.6603251 | 4.6411716  | 33.4630711 |
| H | -2.7311460 | 5.5642517  | 32.3798492 |
| H | -1.0530305 | 5.1996983  | 31.8747855 |
| C | -3.6989572 | 2.9972954  | 32.5102001 |
| H | -1.6223679 | 2.7074232  | 31.9834885 |
| H | -4.0620154 | 2.0236105  | 32.1276453 |
| H | -4.5157384 | 3.7332751  | 32.3565087 |
| H | -3.5298697 | 2.8970943  | 33.6026837 |
| H | 8.0452076  | 5.7620050  | 27.6192268 |
| H | 7.3887705  | 2.0235106  | 32.1528733 |
| H | 5.9901889  | 2.3436070  | 24.9670389 |
| C | 8.0296866  | 5.3585602  | 28.6558755 |
| H | 3.7521449  | 3.2695115  | 31.7932293 |
| H | 6.8318374  | 7.0681594  | 29.3581370 |
| H | 3.5243429  | 4.8401693  | 26.4068773 |
| C | 6.9171216  | 4.3171540  | 28.7064628 |
| C | 6.6353393  | 1.2563778  | 31.8772230 |
| C | 7.7744634  | 6.5409465  | 29.6074481 |
| H | 8.5981053  | 7.2817002  | 29.5477269 |
| C | 6.6331914  | 3.6071279  | 29.8877054 |
| C | 5.0294149  | 1.8910856  | 25.2909099 |
| H | 9.4612335  | 4.3066184  | 29.9534333 |
| C | 6.1442164  | 4.0287050  | 27.5695934 |
| C | 9.4034295  | 4.7164783  | 28.9234861 |
| H | 9.6006697  | 3.8825826  | 28.2206295 |
| H | 6.3265468  | 4.6059423  | 26.6491831 |
| C | 4.6782520  | 2.8524645  | 32.2359672 |
| H | 6.3786199  | 0.7006534  | 32.8023448 |
| H | 7.1186304  | 0.5482493  | 31.1740867 |
| C | 5.6636064  | 2.5876328  | 29.9331227 |
| C | 3.8873699  | 4.1197467  | 25.6447848 |
| C | 5.1526322  | 3.0275498  | 27.5646710 |
| H | 4.3999659  | 1.7435149  | 24.3895249 |
| H | 5.2518617  | 0.8930018  | 25.7158948 |
| C | 5.3763078  | 1.8865710  | 31.2583717 |
| C | 4.9529999  | 2.2621877  | 28.7456227 |
| C | 4.3133652  | 2.7983939  | 26.3083762 |
| H | 5.3439250  | 3.6998579  | 32.5051668 |
| H | 4.7235629  | 4.6081468  | 25.1023996 |
| H | 4.4038624  | 2.3309081  | 33.1761345 |
| H | 7.7058053  | 6.2048004  | 30.6632154 |
| H | 3.0764462  | 3.9399068  | 24.9098133 |
| H | 10.2179471 | 5.4618760  | 28.8134671 |
| H | 4.6680740  | 1.0580600  | 31.0525734 |
| H | 3.3829079  | 2.2839883  | 26.6269810 |
| H | 7.1948718  | 3.8423401  | 30.8061449 |
| C | 3.8500934  | 6.8254072  | 28.5456398 |
| C | 2.5112617  | 6.9253168  | 28.2917078 |
| C | 1.8376503  | 6.4611501  | 29.5239680 |
| O | 2.7403632  | 6.1182418  | 30.4674302 |
| C | 4.0623714  | 6.2845280  | 29.9206576 |
| O | 0.6219844  | 6.3025127  | 29.7110488 |
| C | 1.7257048  | 7.1728764  | 27.0779761 |

$$\mathbf{E}_{ed} = \mathbf{G}\mathbf{1}_{ed}$$

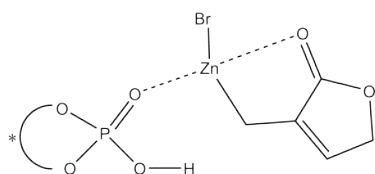

Energy (Hartree) = -7273.236046042

|   |            |            |            |
|---|------------|------------|------------|
| C | -0.3281429 | 1.0316672  | 29.5111092 |
| C | 0.5520943  | 0.0244355  | 29.9055852 |
| C | 0.1044562  | -0.8891175 | 30.9292199 |
| C | 0.9600672  | -1.8625893 | 31.5251734 |
| C | -1.2585029 | -0.7937474 | 31.3976457 |
| C | -1.7148278 | -1.7105628 | 32.3911418 |
| C | -2.1180812 | 0.2257031  | 30.8900142 |
| H | -3.1547015 | 0.2704626  | 31.2553996 |
| C | -1.6726358 | 1.1759902  | 29.9812196 |
| C | 4.0636958  | 1.0536285  | 28.7161992 |
| C | 4.5321920  | -0.1462531 | 28.1927482 |
| H | 5.5650347  | -0.1967479 | 27.8153806 |
| C | 3.7096938  | -1.3048462 | 28.1081006 |
| C | 4.1833780  | -2.5022700 | 27.4929479 |
| C | 2.3628637  | -1.2605825 | 28.6246415 |
| C | 1.5312795  | -2.4058412 | 28.4369084 |
| C | 1.9000240  | -0.0568400 | 29.2726769 |
| C | 2.7403233  | 1.0637949  | 29.2474614 |
| O | 0.1140046  | 1.9620641  | 28.5628671 |
| O | 2.3097000  | 2.2594325  | 29.8232697 |
| P | 1.1208193  | 3.1206147  | 29.1005975 |
| O | 0.4866420  | 3.8640154  | 30.3355544 |
| H | 0.4173695  | 4.8925810  | 30.1794226 |
| O | 1.5758235  | 3.9707091  | 27.9343462 |
| C | -0.8642117 | -2.6636063 | 32.9307155 |
| C | 0.4876516  | -2.7281389 | 32.5022356 |
| H | -2.7590769 | -1.6357555 | 32.7331156 |
| H | -1.2302876 | -3.3598633 | 33.7004549 |
| H | 2.0103926  | -1.9172625 | 31.2065466 |
| H | 1.1690408  | -3.4669161 | 32.9510358 |
| C | 2.0166594  | -3.5485386 | 27.8171369 |
| C | 3.3579360  | -3.6069657 | 27.3540653 |
| H | 0.4880360  | -2.3722039 | 28.7793487 |
| H | 1.3522485  | -4.4148307 | 27.6776162 |
| H | 3.7329357  | -4.5219182 | 26.8709057 |
| H | 5.2173832  | -2.5241164 | 27.1143776 |
| C | -2.6460636 | 3.4991192  | 30.2814477 |
| C | -2.4444826 | 2.3501930  | 29.4646184 |
| C | -3.0820142 | 4.6848941  | 29.6636971 |
| C | -2.7779603 | 2.3863406  | 28.0814017 |
| C | -3.2020253 | 3.5999805  | 27.5148482 |
| C | -3.3154065 | 4.7735454  | 28.2801822 |
| H | -3.2050244 | 5.5930588  | 30.2739483 |
| C | -2.7180032 | 1.1103195  | 27.2428071 |
| H | -3.4094219 | 3.6374608  | 26.4373835 |
| C | -2.4745981 | 1.3406444  | 25.7470319 |
| H | -2.3227012 | 0.3698993  | 25.2327270 |
| H | -1.5809781 | 1.9719856  | 25.5725369 |

|    |            |           |            |
|----|------------|-----------|------------|
| H  | 2.3159294  | 7.6329778 | 26.2626301 |
| H  | 4.6726974  | 7.0239676 | 27.8459068 |
| H  | 4.5611916  | 5.2885764 | 29.9200296 |
| H  | 4.6391869  | 6.9475148 | 30.6025462 |
| Zn | 1.0146729  | 5.3780519 | 26.4983383 |
| H  | 0.8268030  | 7.7885748 | 27.2849125 |
| Br | -0.0840461 | 4.2890839 | 24.7714129 |

### $F_{ed} = G2_{ed}$ ; COSMO

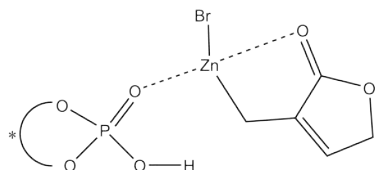

Energy (Hartree) = -7273.226983067

|   |            |            |            |
|---|------------|------------|------------|
| C | 0.1529679  | 1.4662544  | 29.2425909 |
| C | 0.8351036  | 0.2528158  | 29.3967901 |
| C | 0.2867487  | -0.7329331 | 30.2972542 |
| C | 0.9926528  | -1.9171459 | 30.6696139 |
| C | -1.0128070 | -0.5038338 | 30.8762963 |
| C | -1.5752321 | -1.4831720 | 31.7494879 |
| C | -1.7038788 | 0.7006018  | 30.5728236 |
| H | -2.7171412 | 0.8482563  | 30.9766222 |
| C | -1.1404101 | 1.7083186  | 29.7948792 |
| C | 4.4658914  | 0.6616538  | 28.2288632 |
| C | 4.6472368  | -0.5151893 | 27.5088541 |
| H | 5.6395175  | -0.7331247 | 27.0857422 |
| C | 3.5805648  | -1.4254763 | 27.2611798 |
| C | 3.7703019  | -2.5807713 | 26.4440261 |
| C | 2.2754223  | -1.1659765 | 27.8199938 |
| C | 1.2057078  | -2.0499229 | 27.4870082 |
| C | 2.1031318  | -0.0096680 | 28.6650026 |
| C | 3.1724506  | 0.8759039  | 28.7896625 |
| O | 0.7106921  | 2.4777446  | 28.4450033 |
| O | 2.9816752  | 2.0356716  | 29.5588029 |
| P | 2.0934770  | 3.2239459  | 28.8989867 |
| O | 1.8191126  | 4.1517185  | 30.1652812 |
| H | 1.9571285  | 5.1199078  | 29.8732964 |
| O | 2.6849557  | 3.9476001  | 27.7081332 |
| C | -0.8725816 | -2.6340615 | 32.0716190 |
| C | 0.4275493  | -2.8418094 | 31.5368798 |
| H | -2.5746998 | -1.2981472 | 32.1733697 |
| H | -1.3119295 | -3.3798807 | 32.7513389 |
| H | 2.0028855  | -2.0887120 | 30.2733131 |
| H | 0.9956262  | -3.7419913 | 31.8168514 |
| C | 1.4199451  | -3.1550351 | 26.6745132 |
| C | 2.7143600  | -3.4332667 | 26.1588290 |
| H | 0.1976411  | -1.8428053 | 27.8727043 |
| H | 0.5778867  | -3.8180770 | 26.4238639 |
| H | 2.8727021  | -4.3167800 | 25.5218984 |
| H | 4.7729943  | -2.7730994 | 26.0312212 |
| C | -2.1534733 | 3.8903648  | 30.5639092 |
| C | -1.9588893 | 2.9368387  | 29.5295684 |
| C | -3.1416181 | 4.8805645  | 30.3938397 |
| C | -2.6867932 | 3.0440122  | 28.3119295 |
| C | -3.6542054 | 4.0594871  | 28.1887964 |
| C | -3.9249895 | 4.9674134  | 29.2308649 |
| H | -3.3240977 | 5.6022373  | 31.2071078 |
| C | -2.4526439 | 2.0805260  | 27.1497936 |
| H | -4.2391613 | 4.1213745  | 27.2567331 |
| C | -1.7510856 | 2.7903186  | 25.9760244 |
| H | -1.5145212 | 2.0688571  | 25.1672201 |
| H | -0.8010909 | 3.2598353  | 26.2995635 |
| H | -2.3971388 | 3.5795132  | 25.5359469 |

|   |            |            |            |
|---|------------|------------|------------|
| C | -3.7451685 | 1.3785738  | 26.6996463 |
| H | -1.7646659 | 1.2876397  | 27.5076992 |
| H | -3.5259964 | 0.6314602  | 25.9094408 |
| H | -4.4800689 | 2.0966264  | 26.2798596 |
| H | -4.2327388 | 0.8520145  | 27.5450587 |
| C | -5.0429213 | 5.9982620  | 29.1173746 |
| C | -4.7541137 | 7.0586749  | 28.0402314 |
| H | -3.8179832 | 7.6112271  | 28.2577340 |
| H | -5.5772448 | 7.8005383  | 27.9869532 |
| H | -4.6561830 | 6.5975485  | 27.0348880 |
| C | -6.4076531 | 5.3251904  | 28.8834925 |
| H | -5.0924712 | 6.5243348  | 30.0958778 |
| H | -6.4386627 | 4.8027252  | 27.9045359 |
| H | -7.2225018 | 6.0781148  | 28.8847441 |
| H | -6.6280179 | 4.5768243  | 29.6711189 |
| C | -1.3364750 | 3.8520834  | 31.8543275 |
| C | -0.7034047 | 5.2176255  | 32.1730233 |
| H | -0.0170703 | 5.1332723  | 33.0398531 |
| H | -1.4673892 | 5.9811815  | 32.4277337 |
| H | -0.1176135 | 5.5925835  | 31.3120165 |
| C | -2.1715481 | 3.3418616  | 33.0430881 |
| H | -0.5028808 | 3.1373327  | 31.6945574 |
| H | -2.5692713 | 2.3245516  | 32.8564667 |
| H | -3.0360908 | 4.0104214  | 33.2383758 |
| H | -1.5572259 | 3.3029492  | 33.9662139 |
| H | 8.7763681  | 5.1934202  | 27.9147945 |
| H | 7.6983359  | 0.7895126  | 31.7334039 |
| H | 7.3906856  | 2.0777823  | 24.8342318 |
| C | 8.7080026  | 4.6467489  | 28.8804605 |
| H | 4.3378162  | 2.6800508  | 31.6865262 |
| H | 7.4060007  | 6.1696514  | 29.7672937 |
| H | 4.2121541  | 4.0122113  | 25.8017001 |
| C | 7.6043596  | 3.6101643  | 28.7167779 |
| C | 6.8134525  | 0.2017856  | 31.4109065 |
| C | 8.3794189  | 5.6802506  | 29.9712927 |
| H | 9.1623047  | 6.4657374  | 30.0128402 |
| C | 7.1301950  | 2.8688293  | 29.8130058 |
| C | 6.4742806  | 1.4662917  | 24.9715634 |
| H | 10.0546532 | 3.4010888  | 30.0907194 |
| C | 7.0347274  | 3.3575130  | 27.4590191 |
| C | 10.0675024 | 3.9694244  | 29.1364825 |
| H | 10.3238066 | 3.2574397  | 28.3257823 |
| H | 7.3862636  | 3.9455372  | 26.5970427 |
| C | 5.1687582  | 2.0405023  | 32.0434709 |
| H | 6.4800697  | -0.4075449 | 32.2767085 |
| H | 7.1446038  | -0.4897852 | 30.6096762 |
| C | 6.1120216  | 1.9092094  | 29.6831630 |
| C | 4.9859631  | 3.5075229  | 25.1944402 |
| C | 6.0127435  | 2.4095951  | 27.2677223 |
| H | 6.0498632  | 1.2632127  | 23.9662878 |
| H | 6.7861766  | 0.4984194  | 25.4146294 |
| C | 5.6797097  | 1.1215772  | 30.9193962 |
| C | 5.5505432  | 1.6748992  | 28.3965458 |
| C | 5.4514213  | 2.2010271  | 25.8600916 |
| H | 5.9732206  | 2.7026657  | 32.4258622 |
| H | 5.8183652  | 4.2260886  | 25.0521666 |
| H | 4.7981040  | 1.4397845  | 32.8999274 |
| H | 8.3297317  | 5.2109497  | 30.9764765 |
| H | 4.5546549  | 3.2915760  | 24.1950018 |
| H | 10.8800017 | 4.7227032  | 29.2041356 |
| H | 4.8380029  | 0.4603928  | 30.6284946 |
| H | 4.5571243  | 1.5511116  | 25.9464338 |
| H | 7.5684128  | 3.0439356  | 30.8086680 |
| C | -0.7469547 | 6.6561009  | 28.3005034 |
| C | 0.6055237  | 6.7122388  | 28.1616818 |
| C | 0.8740092  | 6.5010190  | 26.7179901 |
| O | -0.2715147 | 6.3867333  | 26.0227087 |
| C | -1.3704606 | 6.4548738  | 26.9561178 |
| O | 1.9890299  | 6.3914357  | 26.1927106 |
| C | 1.7761077  | 6.8447548  | 29.0561592 |
| H | 1.5042942  | 6.7878937  | 30.1303056 |

|    |            |           |            |
|----|------------|-----------|------------|
| H  | -1.3359915 | 6.7321388 | 29.2240088 |
| H  | -1.9432718 | 5.5059044 | 26.8813374 |
| H  | -2.0434367 | 7.2841798 | 26.6494930 |
| Zn | 3.2995947  | 5.9757462 | 27.9054388 |
| H  | 2.2352562  | 7.8538898 | 28.9425812 |
| Br | 5.4843583  | 6.6332408 | 27.4745961 |

$$\mathbf{F}_{ed} = \mathbf{G2}_{ed}$$

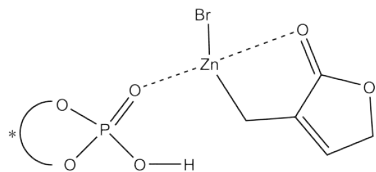

Energy (Hartree) = -7273.215705318

|   |            |            |            |
|---|------------|------------|------------|
| C | 0.1450308  | 1.4746641  | 29.2625515 |
| C | 0.8330613  | 0.2640916  | 29.4125089 |
| C | 0.2936613  | -0.7244945 | 30.3150184 |
| C | 1.0066090  | -1.9062897 | 30.6805973 |
| C | -1.0032543 | -0.5020276 | 30.9024128 |
| C | -1.5544461 | -1.4847695 | 31.7781254 |
| C | -1.7023859 | 0.6984396  | 30.6017373 |
| H | -2.7151512 | 0.8415224  | 31.0085847 |
| C | -1.1482008 | 1.7077368  | 29.8199181 |
| C | 4.4529939  | 0.6948004  | 28.2201238 |
| C | 4.6311414  | -0.4753198 | 27.4885659 |
| H | 5.6212696  | -0.6841355 | 27.0560378 |
| C | 3.5674193  | -1.3894302 | 27.2442633 |
| C | 3.7543582  | -2.5380762 | 26.4179054 |
| C | 2.2673671  | -1.1422359 | 27.8197494 |
| C | 1.2004169  | -2.0322583 | 27.4949289 |
| C | 2.0972098  | 0.0090851  | 28.6715583 |
| C | 3.1626629  | 0.9002785  | 28.7916497 |
| O | 0.6909692  | 2.4888567  | 28.4645951 |
| O | 2.9698914  | 2.0557249  | 29.5653557 |
| P | 2.0761338  | 3.2425066  | 28.9085201 |
| O | 1.8053806  | 4.1741602  | 30.1716904 |
| H | 1.9276891  | 5.1439679  | 29.8609187 |
| O | 2.6554457  | 3.9636715  | 27.7112704 |
| C | -0.8450860 | -2.6326911 | 32.0941041 |
| C | 0.4514464  | -2.8344086 | 31.5499070 |
| H | -2.5516677 | -1.3045519 | 32.2093616 |
| H | -1.2766562 | -3.3808431 | 32.7761613 |
| H | 2.0142082  | -2.0718455 | 30.2753378 |
| H | 1.0250628  | -3.7327622 | 31.8241715 |
| C | 1.4126064  | -3.1311931 | 26.6742272 |
| C | 2.7018247  | -3.3965799 | 26.1406729 |
| H | 0.1962972  | -1.8340983 | 27.8951593 |
| H | 0.5724604  | -3.7993497 | 26.4309557 |
| H | 2.8588890  | -4.2750033 | 25.4965092 |
| H | 4.7532466  | -2.7202769 | 25.9915413 |
| C | -2.1686762 | 3.8940493  | 30.5698172 |
| C | -1.9727409 | 2.9297921  | 29.5461623 |
| C | -3.1518757 | 4.8860994  | 30.3842842 |
| C | -2.6957368 | 3.0255333  | 28.3248439 |
| C | -3.6543296 | 4.0465854  | 28.1844269 |
| C | -3.9249754 | 4.9676474  | 29.2143067 |
| H | -3.3364029 | 5.6158311  | 31.1899005 |
| C | -2.4702856 | 2.0389503  | 27.1801984 |
| H | -4.2341906 | 4.1011734  | 27.2486842 |
| C | -1.7729448 | 2.7177822  | 25.9863208 |
| H | -1.5432760 | 1.9765776  | 25.1936697 |
| H | -0.8189494 | 3.1907442  | 26.2922761 |
| H | -2.4187114 | 3.4975779  | 25.5290784 |
| C | -3.7687338 | 1.3322041  | 26.7552155 |

|   |            |            |            |
|---|------------|------------|------------|
| H | -1.7833406 | 1.2512276  | 27.5507523 |
| H | -3.5596338 | 0.5676275  | 25.9791613 |
| H | -4.5053518 | 2.0432243  | 26.3264994 |
| H | -4.2516940 | 0.8258236  | 27.6152557 |
| C | -5.0346711 | 6.0050919  | 29.0815982 |
| C | -4.7424861 | 7.0382659  | 27.9793424 |
| H | -3.7991288 | 7.5855425  | 28.1778527 |
| H | -5.5580821 | 7.7872559  | 27.9125616 |
| H | -4.6548117 | 6.5536814  | 26.9841677 |
| C | -6.4057289 | 5.3376668  | 28.8701399 |
| H | -5.0759571 | 6.5541348  | 30.0480069 |
| H | -6.4444348 | 4.7900744  | 27.9054035 |
| H | -7.2157875 | 6.0955489  | 28.8553046 |
| H | -6.6279111 | 4.6105514  | 29.6765700 |
| C | -1.3565409 | 3.8657979  | 31.8634867 |
| C | -0.7255720 | 5.2335913  | 32.1754343 |
| H | -0.0391178 | 5.1548125  | 33.0424994 |
| H | -1.4897583 | 5.9981652  | 32.4267268 |
| H | -0.1392246 | 5.6037347  | 31.3129632 |
| C | -2.1953734 | 3.3620425  | 33.0521583 |
| H | -0.5213021 | 3.1514745  | 31.7110415 |
| H | -2.5882867 | 2.3418480  | 32.8720276 |
| H | -3.0636159 | 4.0282700  | 33.2384853 |
| H | -1.5859269 | 3.3321276  | 33.9787272 |
| H | 8.7659042  | 5.2227125  | 27.9605572 |
| H | 7.6886361  | 0.7646162  | 31.7229189 |
| H | 7.3639644  | 2.1351275  | 24.8260085 |
| C | 8.7426790  | 4.6228262  | 28.8964262 |
| H | 4.3406726  | 2.6807291  | 31.6912449 |
| H | 7.5102114  | 6.1003399  | 29.9441390 |
| C | 4.2147632  | 4.0945064  | 25.8431816 |
| H | 7.6206995  | 3.6066382  | 28.7309913 |
| C | 6.7988145  | 0.1870400  | 31.3962411 |
| C | 8.4911077  | 5.5974721  | 30.0584645 |
| H | 9.2805580  | 6.3765329  | 30.0905103 |
| C | 7.1405639  | 2.8595061  | 29.8195575 |
| C | 6.4397626  | 1.5348032  | 24.9588644 |
| H | 10.1314044 | 3.2902428  | 29.9554665 |
| C | 7.0423992  | 3.3765068  | 27.4731058 |
| C | 10.1035201 | 3.9147435  | 29.0373992 |
| H | 10.3043949 | 3.2480547  | 28.1744474 |
| H | 7.3957658  | 3.9731236  | 26.6178444 |
| C | 5.1675125  | 2.0333551  | 32.0429258 |
| H | 6.4618101  | -0.4268597 | 32.2574323 |
| H | 7.1252869  | -0.4999190 | 30.5893749 |
| C | 6.1103536  | 1.9142449  | 29.6824010 |
| C | 4.9832442  | 3.5928926  | 25.2273645 |
| C | 6.0075614  | 2.4454883  | 27.2740564 |
| H | 6.0066298  | 1.3551665  | 23.9529030 |
| H | 6.7423745  | 0.5553804  | 25.3824995 |
| C | 5.6724420  | 1.1194491  | 30.9121300 |
| C | 5.5417921  | 1.7018724  | 28.3954340 |
| C | 5.4336243  | 2.2681796  | 25.8672066 |
| H | 5.9756682  | 2.6888153  | 32.4287054 |
| H | 5.8231023  | 4.3049384  | 25.0975621 |
| H | 4.7939814  | 1.4297217  | 32.8961072 |
| H | 8.5043040  | 5.0779780  | 31.0397852 |
| H | 4.5473515  | 3.4028595  | 24.2248303 |
| H | 10.9309856 | 4.6515651  | 29.1050524 |
| H | 4.8258606  | 0.4665401  | 30.6163617 |
| H | 4.5301982  | 1.6299892  | 25.9487065 |
| H | 7.5824439  | 3.0193460  | 30.8158115 |
| C | -0.7610556 | 6.5997438  | 28.2327574 |
| C | 0.5924776  | 6.6980583  | 28.1350282 |
| C | 0.9105909  | 6.5109312  | 26.6961733 |
| O | -0.2115791 | 6.3787786  | 25.9652061 |
| C | -1.3369774 | 6.3989486  | 26.8660535 |
| O | 2.0429214  | 6.4328475  | 26.2073823 |
| C | 1.7326462  | 6.8411805  | 29.0615233 |
| H | 1.4293746  | 6.8091256  | 30.1278828 |
| H | -1.3794240 | 6.6392754  | 29.1390830 |

|    |            |           |            |
|----|------------|-----------|------------|
| H  | -1.8775478 | 5.4341357 | 26.7608211 |
| H  | -2.0285369 | 7.2106698 | 26.5515301 |
| Zn | 3.3044830  | 5.9814342 | 27.9323504 |
| H  | 2.2114344  | 7.8399282 | 28.9383525 |
| Br | 5.5154500  | 6.6193282 | 27.7367682 |

$G_{ed} = G3_{ed}$ ; COSMO

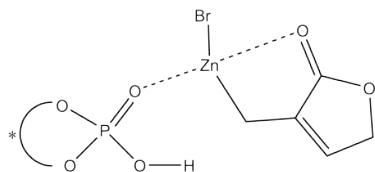

Energy (Hartree) = -7273.251181739

|   |            |            |            |
|---|------------|------------|------------|
| C | -0.1207379 | 0.8687731  | 29.1909079 |
| C | 0.6381863  | -0.1911430 | 29.6994456 |
| C | 0.0382158  | -1.0135891 | 30.7230554 |
| C | 0.7663900  | -2.0057777 | 31.4458992 |
| C | -1.3502075 | -0.8042234 | 31.0591245 |
| C | -1.9627981 | -1.6402588 | 32.0409918 |
| C | -2.0736258 | 0.2617763  | 30.4501779 |
| H | -3.1263877 | 0.4127732  | 30.7313406 |
| C | -1.4726719 | 1.1482867  | 29.5639979 |
| C | 4.2447016  | 0.5362112  | 28.5860373 |
| C | 4.6911582  | -0.7307442 | 28.2345336 |
| H | 5.7222773  | -0.8602653 | 27.8725859 |
| C | 3.8239684  | -1.8608110 | 28.2579446 |
| C | 4.2728029  | -3.1372759 | 27.8028869 |
| C | 2.4489703  | -1.6987988 | 28.6692540 |
| C | 1.5675693  | -2.8117744 | 28.5171292 |
| C | 2.0177539  | -0.4191067 | 29.1839017 |
| C | 2.9253146  | 0.6442176  | 29.1207197 |
| O | 0.4531025  | 1.7111045  | 28.2327346 |
| O | 2.5573660  | 1.8917464  | 29.6278168 |
| P | 1.5203344  | 2.8242340  | 28.7651406 |
| O | 0.8955573  | 3.7176481  | 29.8868575 |
| H | 0.7593661  | 4.7568605  | 29.6301440 |
| O | 2.1135994  | 3.5162044  | 27.5490648 |
| C | -1.2341674 | -2.6187774 | 32.7005511 |
| C | 0.1461754  | -2.7881612 | 32.4107725 |
| H | -3.0258858 | -1.4780721 | 32.2785305 |
| H | -1.7173979 | -3.2514043 | 33.4606248 |
| H | 1.8368792  | -2.1419605 | 31.2386722 |
| H | 0.7315381  | -3.5420821 | 32.9589310 |
| C | 2.0299223  | -4.0342964 | 28.0492358 |
| C | 3.3975973  | -4.2085049 | 27.7075996 |
| H | 0.5046393  | -2.6931231 | 28.7671571 |
| H | 1.3271837  | -4.8739655 | 27.9368639 |
| H | 3.7540958  | -5.1855498 | 27.3475577 |
| H | 5.3276543  | -3.2473334 | 27.5060975 |
| C | -2.3882223 | 3.4691500  | 29.9677043 |
| C | -2.1241759 | 2.3985881  | 29.0616769 |
| C | -2.8686337 | 4.6840777  | 29.4472365 |
| C | -2.3761115 | 2.5670857  | 27.6714258 |
| C | -2.8579795 | 3.8044238  | 27.2089491 |
| C | -3.0924394 | 4.8854045  | 28.0753613 |
| H | -3.0520766 | 5.5247371  | 30.1346541 |
| C | -2.1804996 | 1.4309774  | 26.6686577 |
| H | -3.0398489 | 3.9294249  | 26.1304279 |
| C | -1.2870208 | 1.8325940  | 25.4819175 |
| H | -1.0937166 | 0.9559641  | 24.8296690 |
| H | -0.3120358 | 2.2245729  | 25.8315411 |
| H | -1.7654853 | 2.6110888  | 24.8518031 |
| C | -3.5443018 | 0.8939067  | 26.1930611 |
| H | -1.6739559 | 0.5960136  | 27.1943756 |

|   |            |            |            |
|---|------------|------------|------------|
| H | -3.4114979 | 0.0359381  | 25.5014675 |
| H | -4.1169768 | 1.6776607  | 25.6540822 |
| H | -4.1635193 | 0.5548022  | 27.0484030 |
| C | -3.4888808 | 6.2623594  | 27.5588399 |
| C | -2.2323023 | 7.0248356  | 27.0905254 |
| H | -1.4728304 | 7.0853423  | 27.8949634 |
| H | -2.4902776 | 8.0557682  | 26.7691496 |
| H | -1.7605518 | 6.5063925  | 26.2291766 |
| C | -4.5624405 | 6.2216242  | 26.4608056 |
| H | -3.9129135 | 6.8183571  | 28.4245173 |
| H | -4.1819303 | 5.7454737  | 25.5330061 |
| H | -4.8807519 | 7.2491793  | 26.1900380 |
| H | -5.4597731 | 5.6574693  | 26.7872529 |
| C | -2.1770310 | 3.3444811  | 31.4775820 |
| C | -1.5128288 | 4.5774761  | 32.1146576 |
| H | -1.2813680 | 4.3741261  | 33.1803560 |
| H | -2.1756714 | 5.4671085  | 32.0910486 |
| H | -0.5699633 | 4.8420177  | 31.6015826 |
| C | -3.5126376 | 3.0379262  | 32.1852464 |
| H | -1.4957540 | 2.4865789  | 31.6499785 |
| H | -3.9999115 | 2.1285095  | 31.7806506 |
| H | -4.2255930 | 3.8788787  | 32.0534494 |
| H | -3.3589527 | 2.8891052  | 33.2744432 |
| H | 6.9975796  | 5.7055909  | 26.3879331 |
| H | 7.9038919  | 2.4110570  | 31.2427172 |
| H | 6.0765292  | 1.3036222  | 24.6765997 |
| C | 7.2291248  | 5.4581738  | 27.4462365 |
| H | 4.0911201  | 2.9700357  | 31.4803163 |
| H | 5.7534468  | 6.9299143  | 28.1079687 |
| H | 2.9174631  | 3.3141214  | 25.3219285 |
| C | 6.4290744  | 4.2047360  | 27.7819222 |
| C | 7.2690491  | 1.5024773  | 31.1813565 |
| C | 6.8164677  | 6.6752955  | 28.2899890 |
| H | 7.4289328  | 7.5593538  | 28.0183387 |
| C | 6.4768424  | 3.6067336  | 29.0536188 |
| C | 5.2537257  | 0.7158785  | 25.1347253 |
| H | 9.0363319  | 4.9472718  | 28.5939967 |
| C | 5.6520099  | 3.5722929  | 26.7831066 |
| C | 8.7399343  | 5.1801677  | 27.5496597 |
| H | 9.0376999  | 4.3208272  | 26.9154816 |
| H | 5.6258681  | 4.0204331  | 25.7789333 |
| C | 5.1430552  | 2.7803594  | 31.7691516 |
| H | 7.2768692  | 1.0241233  | 32.1822164 |
| H | 7.7467627  | 0.8055136  | 30.4631592 |
| C | 5.7782590  | 2.4190696  | 29.3463668 |
| C | 3.6041191  | 2.5959064  | 24.8379916 |
| C | 4.9693349  | 2.3561391  | 27.0151380 |
| H | 4.7396554  | 0.1589272  | 24.3246913 |
| H | 5.7105738  | -0.0236110 | 25.8197351 |
| C | 5.8292413  | 1.8435031  | 30.7581674 |
| C | 5.0319787  | 1.7839424  | 28.3194832 |
| C | 4.2614912  | 1.6525514  | 25.8568195 |
| H | 5.6630221  | 3.7591205  | 31.8324334 |
| H | 4.3529063  | 3.1757331  | 24.2601187 |
| H | 5.1482924  | 2.3300427  | 32.7830762 |
| H | 6.9550076  | 6.4910706  | 29.3761243 |
| H | 3.0207799  | 2.0004923  | 24.1067658 |
| H | 9.3228326  | 6.0666257  | 27.2252783 |
| H | 5.2567043  | 0.8925295  | 30.7466929 |
| H | 3.4570522  | 1.0249190  | 26.2945895 |
| H | 7.0680978  | 4.0854510  | 29.8502141 |
| C | 3.3118550  | 8.2069908  | 29.3991786 |
| C | 2.8644692  | 6.9210313  | 29.5318169 |
| C | 1.3922016  | 7.0026618  | 29.3548212 |
| O | 1.0040934  | 8.2695519  | 29.1287468 |
| C | 2.1701304  | 9.1156186  | 29.1025953 |
| O | 0.5295966  | 6.1077323  | 29.3810372 |
| C | 3.5775462  | 5.6422436  | 29.6553287 |
| H | 3.0447293  | 4.9218234  | 30.3032706 |
| H | 4.3546701  | 8.5469103  | 29.4503443 |
| H | 2.0220046  | 9.9325423  | 29.8426963 |

|    |           |           |            |
|----|-----------|-----------|------------|
| H  | 2.2311303 | 9.5769013 | 28.0910934 |
| Zn | 3.6142805 | 4.9609429 | 27.7294118 |
| H  | 4.6122310 | 5.7693678 | 30.0199796 |
| Br | 3.5882972 | 6.4129386 | 25.8556526 |

$$\mathbf{G}_{ed} = \mathbf{G}\mathbf{3}_{ed}$$

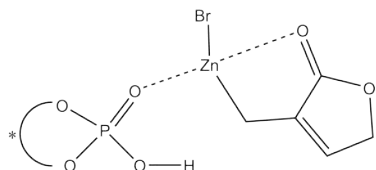

Energy (Hartree) = -7273.241110902

|   |            |            |            |
|---|------------|------------|------------|
| C | -0.1128109 | 0.8678424  | 29.1954795 |
| C | 0.6421305  | -0.1963699 | 29.7011954 |
| C | 0.0383902  | -1.0213479 | 30.7202826 |
| C | 0.7622518  | -2.0189996 | 31.4394380 |
| C | -1.3495233 | -0.8090967 | 31.0556855 |
| C | -1.9649046 | -1.6474275 | 32.0331780 |
| C | -2.0684586 | 0.2610768  | 30.4495015 |
| H | -3.1210519 | 0.4155496  | 30.7293953 |
| C | -1.4646840 | 1.1494749  | 29.5673437 |
| C | 4.2488200  | 0.5296636  | 28.5889973 |
| C | 4.6923606  | -0.7363289 | 28.2312083 |
| H | 5.7222110  | -0.8637484 | 27.8647628 |
| C | 3.8247485  | -1.8657737 | 28.2520864 |
| C | 4.2703670  | -3.1409862 | 27.7918759 |
| C | 2.4508753  | -1.7034281 | 28.6664529 |
| C | 1.5681740  | -2.8147643 | 28.5117361 |
| C | 2.0218005  | -0.4252858 | 29.1866123 |
| C | 2.9308077  | 0.6372335  | 29.1277267 |
| O | 0.4649559  | 1.7124787  | 28.2427795 |
| O | 2.5665974  | 1.8820659  | 29.6406113 |
| P | 1.5324039  | 2.8225256  | 28.7828442 |
| O | 0.9072167  | 3.7083074  | 29.9107301 |
| H | 0.7585941  | 4.7414613  | 29.6540946 |
| O | 2.1276482  | 3.5206452  | 27.5722608 |
| C | -1.2407720 | -2.6311455 | 32.6888644 |
| C | 0.1386625  | -2.8038099 | 32.3995491 |
| H | -3.0275880 | -1.4823820 | 32.2705473 |
| H | -1.7270042 | -3.2653461 | 33.4456274 |
| H | 1.8322776  | -2.1571505 | 31.2315597 |
| H | 0.7210920  | -3.5622112 | 32.9445522 |
| C | 2.0281506  | -4.0359943 | 28.0394204 |
| C | 3.3943711  | -4.2107104 | 27.6946572 |
| H | 0.5062000  | -2.6946349 | 28.7646268 |
| H | 1.3240722  | -4.8743004 | 27.9257456 |
| H | 3.7492574  | -5.1867539 | 27.3304888 |
| H | 5.3244349  | -3.2511520 | 27.4922691 |
| C | -2.3831857 | 3.4676924  | 29.9785544 |
| C | -2.1137471 | 2.4020563  | 29.0685097 |
| C | -2.8646868 | 4.6834330  | 29.4620648 |
| C | -2.3605263 | 2.5768022  | 27.6782911 |
| C | -2.8442391 | 3.8147971  | 27.2206330 |
| C | -3.0858031 | 4.8905501  | 28.0909877 |
| H | -3.0524180 | 5.5203794  | 30.1527431 |
| C | -2.1598771 | 1.4460860  | 26.6704597 |
| H | -3.0233607 | 3.9440358  | 26.1422543 |
| C | -1.2652088 | 1.8553075  | 25.4873425 |
| H | -1.0664777 | 0.9820594  | 24.8322618 |
| H | -0.2928071 | 2.2513459  | 25.8391277 |
| H | -1.7449778 | 2.6335360  | 24.8580494 |
| C | -3.5215285 | 0.9074849  | 26.1908700 |
| H | -1.6520164 | 0.6099744  | 27.1931091 |
| H | -3.3864766 | 0.0537343  | 25.4945459 |

|   |            |            |            |
|---|------------|------------|------------|
| H | -4.0965538 | 1.6922758  | 25.6562251 |
| H | -4.1407218 | 0.5627153  | 27.0437263 |
| C | -3.4896009 | 6.2674267  | 27.5801864 |
| C | -2.2369184 | 7.0456889  | 27.1284730 |
| H | -1.4874421 | 7.1141016  | 27.9411858 |
| H | -2.5028060 | 8.0744395  | 26.8068052 |
| H | -1.7490675 | 6.5358480  | 26.2711091 |
| C | -4.5537078 | 6.2241995  | 26.4732735 |
| H | -3.9269787 | 6.8129180  | 28.4460719 |
| H | -4.1598639 | 5.7626709  | 25.5437621 |
| H | -4.8825170 | 7.2500944  | 26.2091592 |
| H | -5.4464575 | 5.6454905  | 26.7859663 |
| C | -2.1785159 | 3.3365574  | 31.4888744 |
| C | -1.5086640 | 4.5627096  | 32.1328890 |
| H | -1.2880575 | 4.3566986  | 33.2003433 |
| H | -2.1622126 | 5.4589383  | 32.1045036 |
| H | -0.5588801 | 4.8185465  | 31.6288532 |
| C | -3.5190275 | 3.0362084  | 32.1895555 |
| H | -1.5030062 | 2.4742605  | 31.6616049 |
| H | -4.0112927 | 2.1323755  | 31.7785397 |
| H | -4.2264461 | 3.8816030  | 32.0577199 |
| H | -3.3721459 | 2.8817275  | 33.2788893 |
| H | 6.9894020  | 5.7078074  | 26.3990055 |
| H | 7.8936376  | 2.4118973  | 31.2590830 |
| H | 6.0747318  | 1.3107447  | 24.6688627 |
| C | 7.2326192  | 5.4514383  | 27.4525047 |
| H | 4.0776498  | 2.9670322  | 31.4802703 |
| H | 5.7735549  | 6.9297838  | 28.1282193 |
| H | 2.9101890  | 3.3094331  | 25.3429717 |
| C | 6.4309078  | 4.1989252  | 27.7880647 |
| C | 7.2587028  | 1.5034887  | 31.1969848 |
| C | 6.8347651  | 6.6658476  | 28.3066780 |
| H | 7.4531178  | 7.5466993  | 28.0379719 |
| C | 6.4726792  | 3.6040528  | 29.0613266 |
| C | 5.2547698  | 0.7191492  | 25.1269282 |
| H | 9.0490140  | 4.9209111  | 28.5770990 |
| C | 5.6608543  | 3.5628915  | 26.7873695 |
| C | 8.7427798  | 5.1641975  | 27.5379750 |
| H | 9.0289858  | 4.3073737  | 26.8953422 |
| H | 5.6314338  | 4.0141473  | 25.7848031 |
| C | 5.1290232  | 2.7810824  | 31.7728138 |
| H | 7.2637907  | 1.0272542  | 32.1988739 |
| H | 7.7404044  | 0.8060094  | 30.4821810 |
| C | 5.7758920  | 2.4155737  | 29.3531120 |
| C | 3.5977499  | 2.5971717  | 24.8516843 |
| C | 4.9770514  | 2.3482863  | 27.0187168 |
| H | 4.7386285  | 0.1665002  | 24.3153429 |
| H | 5.7163062  | -0.0243868 | 25.8044774 |
| C | 5.8208259  | 1.8432954  | 30.7666485 |
| C | 5.0362603  | 1.7773269  | 28.3236153 |
| C | 4.2647919  | 1.6491396  | 25.8601820 |
| H | 5.6459553  | 3.7614615  | 31.8355679 |
| H | 4.3394014  | 3.1852970  | 24.2732774 |
| H | 5.1316744  | 2.3345666  | 32.7884327 |
| H | 6.9770442  | 6.4743412  | 29.3911656 |
| H | 3.0128098  | 2.0048767  | 24.1192225 |
| H | 9.3288453  | 6.0488089  | 27.2141978 |
| H | 5.2490253  | 0.8918040  | 30.7541992 |
| H | 3.4647938  | 1.0165135  | 26.2989239 |
| H | 7.0585158  | 4.0859197  | 29.8601040 |
| C | 3.2778566  | 8.2210159  | 29.3286724 |
| C | 2.8424615  | 6.9370099  | 29.5104455 |
| C | 1.3676289  | 6.9984611  | 29.3345097 |
| O | 0.9682937  | 8.2540861  | 29.0626796 |
| C | 2.1266896  | 9.1042526  | 28.9906612 |
| O | 0.5159664  | 6.0974348  | 29.3955914 |
| C | 3.5648757  | 5.6688780  | 29.6651622 |
| H | 3.0348048  | 4.9526369  | 30.3194275 |
| H | 4.3190529  | 8.5680128  | 29.3559855 |
| H | 1.9724824  | 9.9592985  | 29.6858500 |
| H | 2.1840482  | 9.5088311  | 27.9543354 |

|    |           |           |            |
|----|-----------|-----------|------------|
| Zn | 3.6074073 | 4.9842136 | 27.7363042 |
| H  | 4.5983953 | 5.8089620 | 30.0281413 |
| Br | 3.6435406 | 6.4242037 | 25.8693113 |

## 5.2 Product Complexes

$D_{prod}$

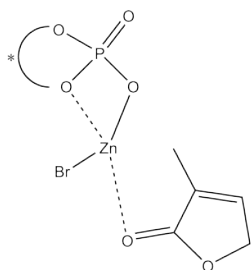

Energy (Hartree) = -7273.257136885

|   |            |            |            |
|---|------------|------------|------------|
| C | -0.0370927 | 1.0064655  | 89.2455240 |
| C | 0.7870266  | -0.0864537 | 89.5309442 |
| C | 0.3873992  | -0.9913722 | 90.5807179 |
| C | 1.2279251  | -2.0356530 | 91.0686941 |
| C | -0.8999290 | -0.8049242 | 91.2031216 |
| C | -1.3153032 | -1.7035239 | 92.2303455 |
| C | -1.7108960 | 0.3007403  | 90.8227727 |
| H | -2.6878657 | 0.4336164  | 91.3114620 |
| C | -1.2892710 | 1.2441845  | 89.8930398 |
| C | 4.3545709  | 0.6171847  | 88.3173213 |
| C | 4.6903983  | -0.6009273 | 87.7372501 |
| H | 5.7172569  | -0.7548733 | 87.3708738 |
| C | 3.7391096  | -1.6490697 | 87.5856941 |
| C | 4.0737652  | -2.8638625 | 86.9159004 |
| C | 2.4086723  | -1.4816671 | 88.1187027 |
| C | 1.4604454  | -2.5286550 | 87.9134225 |
| C | 2.0763263  | -0.2587329 | 88.8062828 |
| C | 3.0218550  | 0.7736045  | 88.8027887 |
| O | 0.3498953  | 1.8870629  | 88.2420933 |
| O | 2.6854544  | 2.0114703  | 89.3418916 |
| P | 1.5057960  | 3.0167982  | 88.5623885 |
| O | 1.1537652  | 3.8358601  | 89.8421052 |
| O | 1.9460625  | 3.6631290  | 87.2930061 |
| C | -0.4857293 | -2.7270316 | 92.6606060 |
| C | 0.8021377  | -2.8813156 | 92.0828369 |
| H | -2.3041206 | -1.5521719 | 92.6911096 |
| H | -0.8137440 | -3.4069178 | 93.4615800 |
| H | 2.2344134  | -2.1559325 | 90.6457491 |
| H | 1.4742471  | -3.6722505 | 92.4492288 |
| C | 1.8135430  | -3.6916180 | 87.2440991 |
| C | 3.1335564  | -3.8689824 | 86.7502163 |
| H | 0.4344791  | -2.3983343 | 88.2850845 |
| H | 1.0620195  | -4.4809851 | 87.0904103 |
| H | 3.4033759  | -4.7988094 | 86.2266912 |
| H | 5.0955804  | -2.9820274 | 86.5222026 |
| C | -2.1907770 | 3.4941810  | 90.5962216 |
| C | -2.0855366 | 2.4781660  | 89.6040708 |
| C | -2.9712530 | 4.6314165  | 90.3165075 |
| C | -2.7329920 | 2.6394925  | 88.3485860 |
| C | -3.4936945 | 3.7992335  | 88.1205084 |
| C | -3.6328827 | 4.8067062  | 89.0908769 |
| H | -3.0590908 | 5.4214919  | 91.0799641 |
| C | -2.6497397 | 1.5811821  | 87.2504864 |
| H | -3.9969221 | 3.9171881  | 87.1472250 |
| C | -2.0262044 | 2.1424730  | 85.9599775 |
| H | -1.9137620 | 1.3400849  | 85.2015980 |
| H | -1.0246119 | 2.5712663  | 86.1575488 |
| H | -2.6608061 | 2.9355227  | 85.5117016 |
| C | -4.0263056 | 0.9423916  | 86.9894330 |
| H | -1.9837852 | 0.7711960  | 87.6111402 |
| H | -3.9489929 | 0.1371998  | 86.2295241 |
| H | -4.7557818 | 1.6895548  | 86.6124808 |
| H | -4.4476254 | 0.5021299  | 87.9159600 |
| C | -4.4589970 | 6.0575482  | 88.8177067 |
| C | -3.8552310 | 6.8940369  | 87.6749933 |
| H | -2.8007075 | 7.1620967  | 87.8867379 |
| H | -4.4285577 | 7.8321860  | 87.5228732 |
| H | -3.8700086 | 6.3337169  | 86.7167957 |
| C | -5.9358275 | 5.7200690  | 88.5460770 |
| H | -4.4211558 | 6.6758555  | 89.7419525 |
| H | -6.0464265 | 5.1110805  | 87.6245515 |
| H | -6.5355863 | 6.6437054  | 88.4084565 |
| H | -6.3776541 | 5.1425572  | 89.3828523 |
| C | -1.4736164 | 3.3954982  | 91.9416275 |
| C | -0.7038315 | 4.6793433  | 92.3061710 |
| H | -0.0343551 | 4.4877908  | 93.1715920 |
| H | -1.3853657 | 5.5048727  | 92.5999191 |
| H | -0.0922485 | 5.0295351  | 91.4520448 |
| C | -2.4341953 | 3.0041649  | 93.0789058 |
| H | -0.7236392 | 2.5821547  | 91.8570410 |
| H | -2.9588767 | 2.0519718  | 92.8665434 |
| H | -3.2090830 | 3.7852746  | 93.2297231 |
| H | -1.8787620 | 2.8804730  | 94.0314249 |
| H | 8.6646476  | 5.1588124  | 87.9460089 |
| H | 7.3531718  | -0.0131853 | 91.1743466 |
| H | 7.0795376  | 2.1924060  | 84.8724873 |
| C | 8.4969600  | 4.7098738  | 88.9498743 |
| H | 5.1129171  | 2.8784711  | 92.2804727 |
| H | 7.1584230  | 6.3454541  | 89.5585863 |
| H | 3.8710426  | 4.0264356  | 86.0172660 |
| C | 7.3900917  | 3.6742949  | 88.7907996 |
| C | 6.2656277  | -0.1968478 | 91.0477675 |
| C | 8.0874236  | 5.8477773  | 89.9021045 |
| H | 8.8860968  | 6.6152518  | 89.9712989 |
| C | 6.9241292  | 2.9349776  | 89.8953985 |
| C | 6.1732072  | 1.5708979  | 85.0318770 |
| H | 9.7220030  | 3.5993713  | 90.4002280 |
| C | 6.8025554  | 3.4301889  | 87.5414302 |
| C | 9.8193656  | 4.0595131  | 89.3947266 |
| H | 10.1301197 | 3.2614459  | 88.6912499 |
| H | 7.1437342  | 4.0168382  | 86.6726705 |
| C | 5.6123859  | 1.8901421  | 92.3226626 |
| H | 5.9175572  | -0.8125103 | 91.9024892 |
| H | 6.1263678  | -0.7885235 | 90.1215258 |
| C | 5.9240415  | 1.9556270  | 89.7723271 |
| C | 4.6548972  | 3.5863999  | 85.3714074 |
| C | 5.7864159  | 2.4689940  | 87.3615361 |
| H | 5.7118087  | 1.3866382  | 84.0397819 |
| H | 6.5071550  | 0.5953034  | 85.4398324 |
| C | 5.4944717  | 1.1365962  | 90.9902942 |
| C | 5.3653111  | 1.7089014  | 88.4829070 |
| C | 5.1772186  | 2.2711284  | 85.9749399 |
| H | 6.6697516  | 2.0496984  | 92.6206558 |
| H | 5.4674558  | 4.3281400  | 85.2215086 |
| H | 5.1209656  | 1.3110761  | 93.1289681 |
| H | 7.8996682  | 5.4672236  | 90.9281744 |
| H | 4.1996020  | 3.3937562  | 84.3781691 |
| H | 10.6345934 | 4.8106599  | 89.4474700 |
| H | 4.4201051  | 0.8844682  | 90.8654736 |
| H | 4.2984507  | 1.6047222  | 86.0925631 |
| H | 7.3635451  | 3.1208067  | 90.8868838 |
| C | 4.5749601  | 7.3994304  | 90.5730895 |
| C | 4.1487073  | 6.1295826  | 90.3495612 |
| C | 3.6398020  | 5.6364960  | 91.6522265 |
| O | 3.7633479  | 6.5940872  | 92.5959328 |
| C | 4.3532798  | 7.7593758  | 92.0035995 |

|    |           |           |            |
|----|-----------|-----------|------------|
| O  | 3.1808903 | 4.5330521 | 91.9636443 |
| C  | 4.1398673 | 5.3121080 | 89.1095064 |
| H  | 4.8406881 | 5.7082239 | 88.3527244 |
| H  | 5.0232815 | 8.0811077 | 89.8369586 |
| H  | 5.2930714 | 7.9944587 | 92.5513927 |
| H  | 3.6581778 | 8.6168507 | 92.1448615 |
| Zn | 2.0499291 | 2.9458890 | 91.3437661 |
| H  | 3.1284545 | 5.2799592 | 88.6557677 |
| Br | 1.8016086 | 1.3780631 | 92.9937532 |
| H  | 4.4247278 | 4.2630816 | 89.3242353 |

### G1<sub>prod</sub>

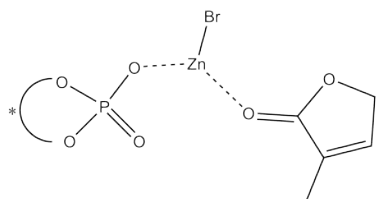

Energy (Hartree) = -7273.263766461

|   |            |            |            |
|---|------------|------------|------------|
| C | -0.2866410 | 0.7172813  | 88.9388467 |
| C | 0.5531106  | -0.2420527 | 89.5159821 |
| C | 0.0437342  | -1.0116935 | 90.6281155 |
| C | 0.8441365  | -1.9226845 | 91.3818643 |
| C | -1.3346219 | -0.8352165 | 91.0275216 |
| C | -1.8664401 | -1.6367895 | 92.0813004 |
| C | -2.1037117 | 0.2161367  | 90.4488143 |
| H | -3.1038660 | 0.4297863  | 90.8580958 |
| C | -1.5745964 | 1.0490052  | 89.4720303 |
| C | 4.1378745  | 0.8209641  | 88.6649904 |
| C | 4.7436224  | -0.4102750 | 88.4444435 |
| H | 5.8279421  | -0.4493145 | 88.2606036 |
| C | 3.9971792  | -1.6221720 | 88.4066972 |
| C | 4.6176017  | -2.8637476 | 88.0749323 |
| C | 2.5804823  | -1.5923085 | 88.6779189 |
| C | 1.8401706  | -2.8044553 | 88.5341318 |
| C | 1.9627012  | -0.3416472 | 89.0427924 |
| C | 2.7378807  | 0.8277694  | 88.9581444 |
| O | 0.1294641  | 1.3882877  | 87.8116985 |
| O | 2.1463700  | 2.0629777  | 89.1930178 |
| P | 1.2317428  | 2.6350529  | 87.9154792 |
| O | 0.5038318  | 3.8651883  | 88.5373027 |
| O | 1.9512761  | 2.7646772  | 86.6104708 |
| C | -1.0711188 | -2.5490517 | 92.7576030 |
| C | 0.3008492  | -2.6738594 | 92.4153183 |
| H | -2.9224194 | -1.4984745 | 92.3625781 |
| H | -1.4935028 | -3.1575531 | 93.5716765 |
| H | 1.9096658  | -2.0268180 | 91.1380425 |
| H | 0.9436258  | -3.3688293 | 92.9770449 |
| C | 2.4701021  | -3.9919896 | 88.1894099 |
| C | 3.8734033  | -4.0290586 | 87.9730608 |
| H | 0.7522396  | -2.7855197 | 88.6887165 |
| H | 1.8750264  | -4.9110273 | 88.0759485 |
| H | 4.3634106  | -4.9781239 | 87.7073447 |
| H | 5.7019286  | -2.8730532 | 87.8817610 |
| C | -2.0363864 | 3.4030749  | 90.1760101 |
| C | -2.1352517 | 2.3999680  | 89.1599367 |
| C | -2.4308429 | 4.7147332  | 89.8740131 |
| C | -2.5818725 | 2.7494990  | 87.8621329 |
| C | -2.9380719 | 4.0968947  | 87.5941065 |
| C | -2.9048007 | 5.0975206  | 88.5998706 |
| H | -2.3461448 | 5.4895129  | 90.6517738 |
| C | -2.7582043 | 1.7024713  | 86.7686021 |
| H | -3.3119998 | 4.3537883  | 86.5927096 |
| C | -2.0505832 | 2.0707425  | 85.4552465 |

|   |            |           |            |
|---|------------|-----------|------------|
| H | -2.1808410 | 1.2562141 | 84.7140109 |
| H | -0.9639421 | 2.2196620 | 85.6049046 |
| H | -2.4554518 | 2.9990277 | 85.0028497 |
| C | -4.2591891 | 1.4274541 | 86.5480200 |
| H | -2.3030546 | 0.7628573 | 87.1423482 |
| H | -4.4001737 | 0.6162302 | 85.8046487 |
| H | -4.7815399 | 2.3289067 | 86.1642714 |
| H | -4.7591573 | 1.1221610 | 87.4896556 |
| C | -3.4427311 | 6.5147917 | 88.3993218 |
| C | -3.7310844 | 6.8896547 | 86.9417965 |
| H | -2.8471117 | 6.7481956 | 86.2876941 |
| H | -4.0328478 | 7.9539200 | 86.8778223 |
| H | -4.5657615 | 6.2873093 | 86.5253852 |
| C | -4.7017374 | 6.7157209 | 89.2687315 |
| H | -2.6522206 | 7.1987524 | 88.7825365 |
| H | -5.5172377 | 6.0402236 | 88.9355570 |
| H | -5.0677479 | 7.7592002 | 89.1839048 |
| H | -4.5093832 | 6.5078821 | 90.3399795 |
| C | -1.4550656 | 3.1329019 | 91.5640174 |
| C | -0.1972154 | 3.9814043 | 91.8234688 |
| H | 0.2635580  | 3.6960857 | 92.7919004 |
| H | -0.4278837 | 5.0655989 | 91.8619931 |
| H | 0.5448460  | 3.8219657 | 91.0173206 |
| C | -2.5148994 | 3.3237915 | 92.6629730 |
| H | -1.1349565 | 2.0750624 | 91.5989572 |
| H | -3.3945519 | 2.6692640 | 92.4959303 |
| H | -2.8804303 | 4.3714468 | 92.7019369 |
| H | -2.0914771 | 3.0802854 | 93.6590710 |
| H | 7.6913168  | 5.8462444 | 87.4596726 |
| H | 6.5739614  | 2.7304444 | 92.3388071 |
| H | 7.1400298  | 1.7335731 | 85.3690132 |
| C | 7.4733688  | 5.6446346 | 88.5315243 |
| H | 2.9794624  | 3.5520169 | 91.2066540 |
| H | 5.8964159  | 7.1791337 | 88.5814321 |
| H | 3.7602489  | 3.5372747 | 85.2959194 |
| C | 6.5377565  | 4.4406839 | 88.5682847 |
| C | 5.9245156  | 1.8632897 | 92.0959060 |
| C | 6.8327643  | 6.9158799 | 89.1139284 |
| H | 7.5224209  | 7.7811637 | 89.0323825 |
| C | 6.0372035  | 3.9321353 | 89.7808103 |
| C | 6.2511252  | 1.0945186 | 85.5560772 |
| H | 8.6637402  | 5.1247625 | 90.3063535 |
| C | 6.1822112  | 3.7736757 | 87.3851008 |
| C | 8.8113844  | 5.3287483 | 89.2249787 |
| H | 9.2914263  | 4.4343023 | 88.7802227 |
| H | 6.5547583  | 4.1694241 | 86.4267914 |
| C | 3.8238036  | 3.2900053 | 91.8735717 |
| H | 5.5546907  | 1.4441064 | 93.0546008 |
| H | 6.5597286  | 1.0965416 | 91.6082531 |
| C | 5.2349033  | 2.7771810 | 89.8310235 |
| C | 4.6250127  | 2.9387050 | 84.9554831 |
| C | 5.3799890  | 2.6157412 | 87.3764867 |
| H | 6.0010514  | 0.5765833 | 84.6071255 |
| H | 6.5469351  | 0.3240125 | 86.2951952 |
| C | 4.7502351  | 2.2701640 | 91.1883803 |
| C | 4.9215483  | 2.0987945 | 88.6205780 |
| C | 5.0587749  | 1.9413198 | 86.0430415 |
| H | 4.3706395  | 4.2211130 | 92.1362002 |
| H | 5.4502117  | 3.6181453 | 84.6551299 |
| H | 3.4049270  | 2.8744380 | 92.8135382 |
| H | 6.5928140  | 6.7911717 | 90.1915201 |
| H | 4.3111193  | 2.3875244 | 84.0456799 |
| H | 9.5174915  | 6.1804833 | 89.1370857 |
| H | 4.1485357  | 1.3562592 | 91.0110767 |
| H | 4.1961307  | 1.2671031 | 86.2167591 |
| H | 6.3014704  | 4.4337756 | 90.7268376 |
| C | 3.1396621  | 6.3894060 | 89.9867510 |
| C | 2.3619804  | 6.3309894 | 88.8756968 |
| C | 0.9810613  | 6.6255307 | 89.3283266 |
| O | 0.9728420  | 6.9115142 | 90.6487506 |
| C | 2.3025611  | 6.7477369 | 91.1670292 |



|    |            |           |            |
|----|------------|-----------|------------|
| O  | -0.0810408 | 6.6426447 | 88.6905692 |
| C  | 2.7296440  | 6.0530106 | 87.4581328 |
| H  | 3.8262069  | 6.0931388 | 87.3195365 |
| H  | 4.2189590  | 6.1947105 | 90.0363888 |
| H  | 2.2722527  | 5.9474649 | 91.9394285 |
| H  | 2.6115889  | 7.6936181 | 91.6640057 |
| Zn | -0.6081482 | 5.0479999 | 87.4441553 |
| H  | 2.2390603  | 6.7735700 | 86.7732196 |
| Br | -0.5040588 | 5.6192997 | 85.2005590 |
| H  | 2.3965641  | 5.0424177 | 87.1409172 |

G2<sub>prod</sub>

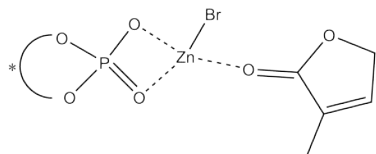

Energy (Hartree) = -7273.255148961

|   |            |            |            |
|---|------------|------------|------------|
| C | 0.1009935  | 0.9854429  | 89.1955397 |
| C | 0.8256410  | -0.1706206 | 89.5043110 |
| C | 0.3149526  | -1.0239455 | 90.5518728 |
| C | 1.0439268  | -2.1370614 | 91.0692943 |
| C | -0.9723327 | -0.7243919 | 91.1345884 |
| C | -1.4983853 | -1.5846765 | 92.1445018 |
| C | -1.6723997 | 0.4493961  | 90.7335156 |
| H | -2.6410175 | 0.6791661  | 91.2039783 |
| C | -1.1378839 | 1.3398455  | 89.8107047 |
| C | 4.4211968  | 0.3334156  | 88.2514512 |
| C | 4.7103802  | -0.9219642 | 87.7329597 |
| H | 5.7268722  | -1.1321824 | 87.3678841 |
| C | 3.7212039  | -1.9442546 | 87.6394398 |
| C | 4.0119430  | -3.1967376 | 87.0206305 |
| C | 2.3947036  | -1.7080511 | 88.1583032 |
| C | 1.4060347  | -2.7205903 | 87.9745895 |
| C | 2.1131691  | -0.4506786 | 88.8081055 |
| C | 3.1046909  | 0.5349120  | 88.7709274 |
| O | 0.5583517  | 1.8368109  | 88.1998891 |
| O | 2.8347197  | 1.7896072  | 89.3170506 |
| P | 1.8781132  | 2.7848652  | 88.4272185 |
| O | 1.6632102  | 4.0825762  | 89.2273918 |
| O | 2.4065179  | 3.1225252  | 87.0132005 |
| C | -0.7778435 | -2.6783724 | 92.5984722 |
| C | 0.5113141  | -2.9431841 | 92.0656363 |
| H | -2.4867363 | -1.3495991 | 92.5701175 |
| H | -1.1934074 | -3.3296872 | 93.3823654 |
| H | 2.0470209  | -2.3495447 | 90.6752644 |
| H | 1.0980143  | -3.7916944 | 92.4495430 |
| C | 1.7174939  | -3.9208426 | 87.3510134 |
| C | 3.0343263  | -4.1702177 | 86.8819535 |
| H | 0.3813064  | -2.5356064 | 88.3258602 |
| H | 0.9348217  | -4.6826909 | 87.2145781 |
| H | 3.2720410  | -5.1285486 | 86.3956356 |
| H | 5.0306875  | -3.3684845 | 86.6388950 |
| C | -1.7442910 | 3.6965791  | 90.4745500 |
| C | -1.7725569 | 2.6587027  | 89.4980646 |
| C | -2.3497627 | 4.9270418  | 90.1656777 |
| C | -2.3643745 | 2.8937224  | 88.2301180 |
| C | -2.9636134 | 4.1423771  | 87.9768038 |
| C | -2.9811725 | 5.1710783  | 88.9314265 |
| H | -2.3305754 | 5.7316255  | 90.9198081 |
| C | -2.3932963 | 1.8306805  | 87.1347584 |
| H | -3.4332439 | 4.3022847  | 86.9955588 |
| C | -1.6952459 | 2.3160141  | 85.8511812 |
| H | -1.6575636 | 1.5018261  | 85.0983971 |
| H | -0.6569376 | 2.6396377  | 86.0588250 |

|   |            |            |            |
|---|------------|------------|------------|
| H | -2.2356224 | 3.1686904  | 85.3892374 |
| C | -3.8319065 | 1.3560709  | 86.8578712 |
| H | -1.8297309 | 0.9500170  | 87.5035891 |
| H | -3.8393128 | 0.5475079  | 86.0979538 |
| H | -4.4654801 | 2.1824468  | 86.4724679 |
| H | -4.3121219 | 0.9671609  | 87.7786649 |
| C | -3.6874655 | 6.5043780  | 88.6964627 |
| C | -4.0333122 | 6.7764728  | 87.2270556 |
| H | -3.1541325 | 6.6558503  | 86.5623541 |
| H | -4.4313626 | 7.8048573  | 87.1042661 |
| H | -4.8188632 | 6.0835688  | 86.8604780 |
| C | -4.9500056 | 6.6107670  | 89.5752014 |
| H | -2.9809372 | 7.2989935  | 89.0311851 |
| H | -5.6874593 | 5.8324271  | 89.2882811 |
| H | -5.4356237 | 7.6023115  | 89.4607514 |
| H | -4.7146721 | 6.4660164  | 90.6482219 |
| C | -1.0877642 | 3.5140745  | 91.8439273 |
| C | -0.0243316 | 4.5856889  | 92.1405663 |
| H | 0.4578116  | 4.3854895  | 93.1196065 |
| H | -0.4647012 | 5.6037744  | 92.1961818 |
| H | 0.7606557  | 4.5827237  | 91.3593980 |
| C | -2.1499564 | 3.4488445  | 92.9571900 |
| H | -0.5599625 | 2.5394261  | 91.8336957 |
| H | -2.8861737 | 2.6402335  | 92.7726136 |
| H | -2.7156904 | 4.4017222  | 93.0287139 |
| H | -1.6766897 | 3.2629564  | 93.9435124 |
| H | 8.1308836  | 5.3605547  | 87.7044435 |
| H | 7.6859448  | 1.0431261  | 91.7338532 |
| H | 7.0718665  | 1.4481084  | 84.8643457 |
| C | 8.0267079  | 4.9254770  | 88.7227350 |
| H | 4.0475810  | 2.3034549  | 91.5185685 |
| H | 6.3467105  | 6.2494245  | 89.2223504 |
| H | 4.2847090  | 3.9202763  | 85.5428089 |
| C | 7.1471090  | 3.6898737  | 88.5839215 |
| C | 6.9292909  | 0.2957454  | 91.4157678 |
| C | 7.3514472  | 5.9870837  | 89.6107132 |
| H | 7.9622143  | 6.9130399  | 89.6541267 |
| C | 6.8383440  | 2.8870199  | 89.6946116 |
| C | 6.0846840  | 0.9687742  | 85.0332535 |
| H | 9.4042359  | 4.1489340  | 90.2527467 |
| C | 6.5852031  | 3.3405304  | 87.3455891 |
| C | 9.4372441  | 4.5769480  | 89.2287947 |
| H | 9.9311766  | 3.8330530  | 88.5714677 |
| H | 6.8124431  | 3.9722088  | 86.4735579 |
| C | 4.9639701  | 1.8354439  | 91.9280238 |
| H | 6.6848366  | -0.3292525 | 92.2998347 |
| H | 7.4035574  | -0.3555719 | 90.6538191 |
| C | 5.9754806  | 1.7819434  | 89.5994642 |
| C | 4.8495982  | 3.1656137  | 84.9646528 |
| C | 5.7219536  | 2.2397803  | 87.1895865 |
| H | 5.6542764  | 0.7153621  | 84.0419506 |
| H | 6.2647710  | 0.0209519  | 85.5765185 |
| C | 5.6649412  | 0.9757881  | 90.8599933 |
| C | 5.4115917  | 1.4552110  | 88.3355898 |
| C | 5.1489992  | 1.9164897  | 85.8101336 |
| H | 5.6272348  | 2.6461603  | 92.2959061 |
| H | 5.7771259  | 3.6468674  | 84.5902644 |
| H | 4.6781637  | 1.2159982  | 92.8035669 |
| H | 7.2285348  | 5.6178794  | 90.6507810 |
| H | 4.2446513  | 2.8890238  | 84.0776496 |
| H | 10.0780906 | 5.4821571  | 89.2689773 |
| H | 4.9622408  | 0.1645137  | 90.5792907 |
| H | 4.1830857  | 1.3954893  | 85.9734593 |
| H | 7.2665001  | 3.1411788  | 90.6777017 |
| C | -0.7281667 | 8.7834137  | 87.8261761 |
| C | 0.0007941  | 7.6775691  | 88.1185895 |
| C | 0.0947319  | 6.9002193  | 86.8595544 |
| O | -0.5871509 | 7.5239340  | 85.8746193 |
| C | -1.1208383 | 8.7552489  | 86.3862409 |
| O | 0.6778907  | 5.8350931  | 86.6347911 |
| C | 0.6251341  | 7.2106847  | 89.3853940 |

|    |            |           |            |
|----|------------|-----------|------------|
| H  | 0.3111820  | 7.8280497 | 90.2470232 |
| H  | -1.0042434 | 9.5929889 | 88.5160794 |
| H  | -2.2208554 | 8.7575250 | 86.2277831 |
| H  | -0.6880162 | 9.5925688 | 85.7946551 |
| Zn | 2.4140031  | 5.1146000 | 87.4828050 |
| H  | 1.7334325  | 7.2563730 | 89.3037603 |
| Br | 3.9981906  | 6.7825200 | 87.3562547 |
| H  | 0.3611406  | 6.1513607 | 89.5792818 |

G3<sub>prod</sub>

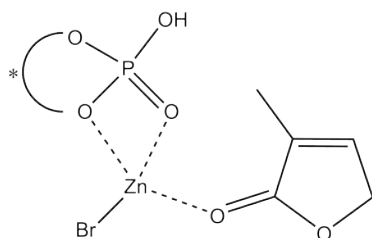

Energy (Hartree) = -7273.257124444

|   |            |            |            |
|---|------------|------------|------------|
| C | 0.2355620  | 1.4213532  | 89.4475700 |
| C | 0.9189937  | 0.2101770  | 89.6075477 |
| C | 0.3394428  | -0.7828029 | 90.4775333 |
| C | 1.0292831  | -1.9768773 | 90.8457833 |
| C | -0.9746951 | -0.5541096 | 91.0278430 |
| C | -1.5549809 | -1.5411886 | 91.8794850 |
| C | -1.6658266 | 0.6494854  | 90.7113794 |
| H | -2.6874797 | 0.7954251  | 91.0951655 |
| C | -1.0806721 | 1.6530517  | 89.9474998 |
| C | 4.5004826  | 0.7047116  | 88.3048830 |
| C | 4.6606235  | -0.4408828 | 87.5341095 |
| H | 5.6246073  | -0.6157213 | 87.0330002 |
| C | 3.6036655  | -1.3711880 | 87.3289458 |
| C | 3.7644764  | -2.4871129 | 86.4548859 |
| C | 2.3306612  | -1.1556044 | 87.9710692 |
| C | 1.2556589  | -2.0372056 | 87.6512654 |
| C | 2.1872270  | -0.0337235 | 88.8662337 |
| C | 3.2501521  | 0.8676014  | 88.9784763 |
| O | 0.8289298  | 2.4507504  | 88.7233519 |
| O | 3.1119203  | 1.9564874  | 89.8310278 |
| P | 2.2340208  | 3.2612802  | 89.3395058 |
| O | 1.9983030  | 4.1745234  | 90.4941527 |
| O | 2.7181889  | 3.7750408  | 87.9490484 |
| C | -0.8646593 | -2.6991886 | 92.2022641 |
| C | 0.4428291  | -2.9100606 | 91.6886406 |
| H | -2.5624206 | -1.3579563 | 92.2851687 |
| H | -1.3218560 | -3.4498943 | 92.8647258 |
| H | 2.0442354  | -2.1460293 | 90.4598244 |
| H | 0.9985393  | -3.8190158 | 91.9651800 |
| C | 1.4392792  | -3.1028073 | 86.7819612 |
| C | 2.7068295  | -3.3423200 | 86.1885442 |
| H | 0.2641548  | -1.8543771 | 88.0870924 |
| H | 0.5907058  | -3.7618447 | 86.5428950 |
| H | 2.8409831  | -4.1935273 | 85.5038133 |
| H | 4.7447241  | -2.6421404 | 85.9773149 |
| C | -2.0244686 | 3.9079618  | 90.5942491 |
| C | -1.8211788 | 2.9088898  | 89.6078186 |
| C | -2.7992562 | 5.0379922  | 90.2602556 |
| C | -2.3481425 | 3.0763081  | 88.2923795 |
| C | -3.1008037 | 4.2292053  | 88.0116905 |
| C | -3.3518845 | 5.2166723  | 88.9842392 |
| H | -2.9716054 | 5.8132340  | 91.0248417 |
| C | -2.1558165 | 2.0024578  | 87.2204371 |
| H | -3.5159258 | 4.3570018  | 87.0007304 |
| C | -2.1479665 | 2.5465260  | 85.7848750 |

|   |            |            |            |
|---|------------|------------|------------|
| H | -1.8277753 | 1.7525749  | 85.0819669 |
| H | -1.4384883 | 3.3899436  | 85.6694037 |
| H | -3.1523879 | 2.8934927  | 85.4637120 |
| C | -3.2085271 | 0.8869051  | 87.3739994 |
| H | -1.1618879 | 1.5353060  | 87.3853223 |
| H | -3.0374268 | 0.0836106  | 86.6281886 |
| H | -4.2304258 | 1.2914908  | 87.2176303 |
| H | -3.1744216 | 0.4295935  | 88.3824147 |
| C | -4.1960198 | 6.4430682  | 88.6579227 |
| C | -3.5654363 | 7.2946674  | 87.5414626 |
| H | -2.5367196 | 7.6098581  | 87.8079547 |
| H | -4.1680971 | 8.2063526  | 87.3483208 |
| H | -3.5021843 | 6.7277351  | 86.5888379 |
| C | -5.6453439 | 6.0558874  | 88.3125291 |
| H | -4.2256795 | 7.0675728  | 89.5780251 |
| H | -5.6868613 | 5.4367570  | 87.3921001 |
| H | -6.2676348 | 6.9579730  | 88.1377824 |
| H | -6.1094517 | 5.4693603  | 89.1304480 |
| C | -1.4350069 | 3.7910742  | 91.9984042 |
| C | -0.6003477 | 5.0237917  | 92.3870372 |
| H | -0.1737990 | 4.8888974  | 93.4023396 |
| H | -1.2110218 | 5.9509186  | 92.4082186 |
| H | 0.2454262  | 5.1575623  | 91.6855938 |
| C | -2.5366584 | 3.5021783  | 93.0349162 |
| H | -0.7408590 | 2.9260376  | 91.9944014 |
| H | -3.1027456 | 2.5818479  | 92.7853417 |
| H | -3.2665964 | 4.3372990  | 93.0881559 |
| H | -2.0998621 | 3.3712541  | 94.0464191 |
| H | 8.8113905  | 5.2089461  | 87.6246531 |
| H | 8.0880687  | 0.8115763  | 91.4851811 |
| H | 6.8393035  | 2.1963104  | 84.6201736 |
| C | 8.7359343  | 4.7448834  | 88.6330567 |
| H | 4.6779032  | 2.5958534  | 91.7894729 |
| H | 7.4114446  | 6.3342624  | 89.3791192 |
| H | 4.1570267  | 4.3871543  | 86.1808927 |
| C | 7.6333079  | 3.6963293  | 88.5537578 |
| C | 7.1939047  | 0.2072526  | 91.2246709 |
| C | 8.3815292  | 5.8613092  | 89.6321068 |
| H | 9.1616599  | 6.6508192  | 89.6395969 |
| C | 7.2985067  | 2.9056457  | 89.6667375 |
| C | 5.9105068  | 1.6500901  | 84.8892214 |
| H | 10.0999907 | 3.6429768  | 89.9615420 |
| C | 6.9061255  | 3.5008889  | 87.3689737 |
| C | 10.1025305 | 4.1155287  | 88.9570309 |
| H | 10.3700352 | 3.3317862  | 88.2200957 |
| H | 7.1478385  | 4.1254706  | 86.4935672 |
| C | 5.5597761  | 1.9803006  | 92.0529136 |
| H | 6.9580350  | -0.4349076 | 92.0986067 |
| H | 7.4717126  | -0.4523870 | 90.3776336 |
| C | 6.2819111  | 1.9362094  | 89.6182451 |
| C | 4.6431616  | 3.7806862  | 85.3921937 |
| C | 5.8737309  | 2.5500112  | 87.2660577 |
| H | 5.3086012  | 1.5173905  | 83.9665944 |
| H | 6.2079869  | 0.6447874  | 85.2471312 |
| C | 5.9938084  | 1.1026510  | 90.8652215 |
| C | 5.5706403  | 1.7465975  | 88.4018709 |
| C | 5.1067974  | 2.4219086  | 85.9510374 |
| H | 6.3748024  | 2.6616635  | 92.3754280 |
| H | 5.4869380  | 4.3711807  | 84.9778245 |
| H | 5.2909230  | 1.3490381  | 92.9251583 |
| H | 8.2981563  | 5.4633432  | 90.6650837 |
| H | 3.9196649  | 3.6232607  | 84.5642306 |
| H | 10.9042978 | 4.8829225  | 88.9523750 |
| H | 5.1475265  | 0.4252997  | 90.6312221 |
| H | 4.1920549  | 1.8292836  | 86.1584664 |
| H | 7.8494743  | 3.0459157  | 90.6108263 |
| C | 0.1902782  | 7.8868314  | 86.6834418 |
| C | 0.3134856  | 6.6009361  | 87.1023438 |
| C | 0.6412251  | 5.8090264  | 85.8923373 |
| O | 0.7106917  | 6.6137522  | 84.8104975 |
| C | 0.4352308  | 7.9622048  | 85.2139495 |

|    |            |           |            |
|----|------------|-----------|------------|
| O  | 0.8140079  | 4.5936669 | 85.7569901 |
| C  | 0.1761967  | 6.0018663 | 88.4544381 |
| H  | -0.3838257 | 6.6627404 | 89.1402325 |
| H  | -0.0564748 | 8.7593108 | 87.3043452 |
| H  | -0.4432032 | 8.3289135 | 84.6373797 |
| H  | 1.3068219  | 8.5971951 | 84.9393079 |
| Zn | 1.5883435  | 2.9011999 | 86.6030055 |
| H  | 1.1678423  | 5.7993312 | 88.9078035 |
| Br | 1.4308686  | 1.0915921 | 85.2088057 |
| H  | -0.3540745 | 5.0302811 | 88.4048701 |

### G1<sub>int</sub>; COSMO

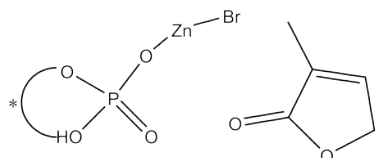

Energy (Hartree) = -7273.249509036

|   |            |            |            |
|---|------------|------------|------------|
| C | 0.2782137  | 2.0795582  | 1.5404341  |
| C | 1.6673365  | 2.0896262  | 1.4635281  |
| C | 2.3101474  | 3.3810269  | 1.4076928  |
| C | 3.7088408  | 3.5425350  | 1.1816517  |
| C | 1.4951000  | 4.5688085  | 1.5507557  |
| C | 2.1284551  | 5.8478507  | 1.5302813  |
| C | 0.0720324  | 4.4668886  | 1.6488228  |
| H | -0.5152760 | 5.3940943  | 1.7216079  |
| C | -0.5660481 | 3.2358118  | 1.5912127  |
| C | 2.7302432  | -1.5005644 | 0.4786962  |
| C | 3.8055468  | -1.7011156 | 1.3320482  |
| H | 4.3827002  | -2.6362035 | 1.2613324  |
| C | 4.1628838  | -0.7410045 | 2.3198107  |
| C | 5.2136550  | -1.0003934 | 3.2502727  |
| C | 3.4241580  | 0.4960848  | 2.4047747  |
| C | 3.7346072  | 1.3816173  | 3.4828466  |
| C | 2.3808716  | 0.7750776  | 1.4407466  |
| C | 2.0215976  | -0.2587458 | 0.5525760  |
| O | -0.3513439 | 0.8528195  | 1.4947834  |
| O | 1.0134705  | -0.1250297 | -0.3903364 |
| P | -0.5517313 | 0.3131707  | -0.0759687 |
| O | -0.9573129 | 1.3523222  | -1.0747598 |
| H | -3.0520572 | -2.1661662 | -1.5275806 |
| O | -1.4891530 | -0.9061688 | 0.2070409  |
| C | 3.4975125  | 5.9673358  | 1.3394205  |
| C | 4.2886929  | 4.8040290  | 1.1474155  |
| H | 1.5019278  | 6.7456294  | 1.6515944  |
| H | 3.9687183  | 6.9617485  | 1.3195206  |
| H | 4.3295579  | 2.6488824  | 1.0273919  |
| H | 5.3699761  | 4.9019100  | 0.9661225  |
| C | 4.7489602  | 1.0923035  | 4.3856386  |
| C | 5.5109718  | -0.0996510 | 4.2616062  |
| H | 3.1487592  | 2.3020014  | 3.6083373  |
| H | 4.9578620  | 1.7919270  | 5.2094499  |
| H | 6.3189574  | -0.3142121 | 4.9775103  |
| H | 5.7735512  | -1.9443150 | 3.1576107  |
| C | -2.6823039 | 3.2908244  | 0.1893464  |
| C | -2.0277669 | 2.9468401  | 1.4133174  |
| C | -3.9296629 | 2.7078116  | -0.1110265 |
| C | -2.6763409 | 2.0730682  | 2.3266863  |
| C | -3.9142207 | 1.4591875  | 1.9601027  |
| C | -4.5678367 | 1.7889989  | 0.7307724  |
| H | -4.4178269 | 2.9653501  | -1.0620485 |
| C | -2.1252307 | 1.8356048  | 3.7289108  |
| H | -4.4950323 | 0.9450880  | 2.7444320  |
| C | -2.0808205 | 0.3562316  | 4.1396900  |
| H | -1.6155194 | 0.2466218  | 5.1399297  |

|   |            |             |            |
|---|------------|-------------|------------|
| H | -1.4591812 | -0.2349204  | 3.4338144  |
| H | -3.0890913 | -0.1028142  | 4.2030389  |
| C | -2.9345691 | 2.6772424   | 4.7376441  |
| H | -1.0850835 | 2.2190992   | 3.7443420  |
| H | -2.5039324 | 2.5787165   | 5.7548243  |
| H | -3.9917977 | 2.3422041   | 4.7825911  |
| H | -2.9295028 | 3.7509660   | 4.4626393  |
| C | -5.9060608 | 1.1897214   | 0.3184987  |
| C | -5.6991075 | 0.0381943   | -0.6889876 |
| H | -5.0713602 | 0.3299045   | -1.5535768 |
| H | -6.6764255 | -0.3182818  | -1.0736476 |
| H | -5.2218824 | -0.8349527  | -0.1904683 |
| C | -6.7822666 | 0.7508149   | 1.4991191  |
| H | -6.4369651 | 2.0024074   | -0.2244992 |
| H | -6.3471559 | -0.1249021  | 2.0242546  |
| H | -7.7827844 | 0.4444496   | 1.1342184  |
| H | -6.9238462 | 1.5681124   | 2.2353767  |
| C | -2.0780089 | 4.2837725   | -0.7936485 |
| C | -2.3684691 | 3.9726513   | -2.2698367 |
| H | -1.7822131 | 4.6611607   | -2.9119648 |
| H | -3.4363146 | 4.1272679   | -2.5299397 |
| H | -2.0884777 | 2.9337016   | -2.5256342 |
| C | -2.5510203 | 5.7090333   | -0.4323382 |
| H | -0.9785171 | 4.2395604   | -0.6594115 |
| H | -2.3314910 | 5.9723697   | 0.6217922  |
| H | -3.6479757 | 5.8042200   | -0.5744113 |
| H | -2.0569521 | 6.4569112   | -1.0857511 |
| H | 0.2088398  | -6.0351939  | -3.0412521 |
| H | 4.9027680  | -2.5279283  | -3.9347986 |
| H | 1.5433641  | -5.3741539  | 1.7998588  |
| C | 0.9827771  | -5.4028006  | -3.5293995 |
| H | 2.5372157  | 0.1203654   | -2.4569843 |
| H | -0.5306415 | -4.0512153  | -4.3859015 |
| H | -1.4242605 | -3.3945058  | 0.4501241  |
| C | 1.4634550  | -4.4079736  | -2.4792168 |
| C | 5.1849904  | -2.1334267  | -2.9364443 |
| C | 0.3136258  | -4.6881772  | -4.7183588 |
| H | -0.0776004 | -5.4229364  | -5.4521463 |
| C | 2.4835931  | -3.4824081  | -2.7644311 |
| H | 1.4957179  | -4.3198218  | 2.1443928  |
| C | 2.9161280  | -5.7642219  | -4.5167909 |
| C | 0.8823102  | -4.3754012  | -1.1993167 |
| C | 2.1148239  | -6.3330444  | -4.0000257 |
| H | 2.5789805  | -6.48673277 | -3.1465563 |
| H | 0.0852668  | -5.0985146  | -0.9673874 |
| C | 3.3602260  | -0.3637775  | -3.0181269 |
| H | 5.9744487  | -1.3714083  | -3.0997378 |
| H | 5.6274976  | -2.9685862  | -2.3564746 |
| C | 2.9220387  | -2.5387630  | -1.8158132 |
| C | -0.8132249 | -3.9505231  | 1.1851173  |
| C | 1.2804483  | -3.4504390  | -0.2154122 |
| H | 1.0522437  | -4.3121406  | 3.1616594  |
| H | 2.5339302  | -3.9420299  | 2.2225456  |
| C | 3.9861572  | -1.5120802  | -2.2019479 |
| C | 2.3116319  | -2.5246745  | -0.5326604 |
| C | 0.6456296  | -3.4740567  | 1.1747259  |
| H | 2.9450241  | -0.7418470  | -3.9767567 |
| H | -0.8972660 | -5.0362429  | 0.9697401  |
| H | 4.1182713  | 0.4099962   | -3.2594396 |
| H | 1.0358414  | -4.0344843  | -5.2514615 |
| H | -1.2645126 | -3.7814961  | 2.1833090  |
| H | 1.7313188  | -7.0905318  | -4.7144508 |
| H | 4.3733955  | -1.0686594  | -1.2615411 |
| H | 0.6495005  | -2.4283163  | 1.5513444  |
| H | 2.9479062  | -3.4866691  | -3.7631202 |
| C | -0.4489192 | -1.1211262  | -3.2587308 |
| C | -1.7671181 | -1.3156475  | -3.0206766 |
| C | -2.4837245 | -0.0825177  | -3.4545199 |
| O | -1.5679592 | 0.7875187   | -3.9938453 |
| C | -0.2542856 | 0.2351397   | -3.8577163 |
| O | -3.6687615 | 0.1906732   | -3.3818090 |

|    |            |            |            |
|----|------------|------------|------------|
| C  | -2.4912558 | -2.4777028 | -2.4319316 |
| H  | -1.7908137 | -3.2820253 | -2.1396583 |
| H  | 0.3771090  | -1.8096171 | -3.0296887 |
| H  | 0.3329992  | 0.8997252  | -3.1865933 |
| H  | 0.2389968  | 0.2123883  | -4.8549908 |
| Zn | -3.0394336 | -0.5168643 | 1.2984776  |
| H  | -3.2353344 | -2.8818689 | -3.1495405 |
| Br | -4.2369464 | -2.2908595 | 2.2094908  |

G1<sub>int</sub>

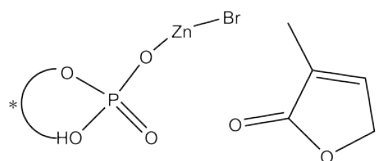

Energy (Hartree) = -7273.23957322

|   |            |            |            |
|---|------------|------------|------------|
| C | 0.2813344  | 2.0752166  | 1.5399527  |
| C | 1.6708516  | 2.0874362  | 1.4670503  |
| C | 2.3118815  | 3.3795296  | 1.4116646  |
| C | 3.7110599  | 3.5426737  | 1.1912546  |
| C | 1.4948475  | 4.5663118  | 1.5490177  |
| C | 2.1269459  | 5.8454330  | 1.5284408  |
| C | 0.0718743  | 4.4621002  | 1.6416168  |
| H | -0.5174375 | 5.3884918  | 1.7080289  |
| C | -0.5649975 | 3.2305979  | 1.5849405  |
| C | 2.7331081  | -1.5027519 | 0.4824249  |
| C | 3.8068717  | -1.7043588 | 1.3371148  |
| H | 4.3812933  | -2.6411876 | 1.2666968  |
| C | 4.1653440  | -0.7445985 | 2.3245557  |
| C | 5.2153009  | -1.0039151 | 3.2551410  |
| C | 3.4278547  | 0.4931518  | 2.4091143  |
| C | 3.7393718  | 1.3785419  | 3.4866216  |
| C | 2.3856552  | 0.7734297  | 1.4445165  |
| C | 2.0272176  | -0.2593006 | 0.5546297  |
| O | -0.3460662 | 0.8479975  | 1.4931414  |
| O | 1.0235018  | -0.1237565 | -0.3912335 |
| P | -0.5430759 | 0.3133257  | -0.0814198 |
| O | -0.9449930 | 1.3569285  | -1.0755269 |
| H | -3.0429509 | -2.1475693 | -1.5341340 |
| O | -1.4777780 | -0.9092494 | 0.1959966  |
| C | 3.4961189  | 5.9666812  | 1.3435136  |
| C | 4.2892461  | 4.8044378  | 1.1575236  |
| H | 1.4985777  | 6.7426045  | 1.6447772  |
| H | 3.9658103  | 6.9617490  | 1.3235624  |
| H | 4.3325620  | 2.6488769  | 1.0419075  |
| H | 5.3711911  | 4.9031792  | 0.9810167  |
| C | 4.7536725  | 1.0890191  | 4.3887146  |
| C | 5.5139971  | -0.1033428 | 4.2654668  |
| H | 3.1543768  | 2.2996034  | 3.6104197  |
| H | 4.9636893  | 1.7892377  | 5.2116589  |
| H | 6.3218660  | -0.3185591 | 4.9811902  |
| H | 5.7738964  | -1.9486477 | 3.1631527  |
| C | -2.6772787 | 3.2699459  | 0.1750323  |
| C | -2.0261320 | 2.9380403  | 1.4046112  |
| C | -3.9191399 | 2.6767385  | -0.1266882 |
| C | -2.6742701 | 2.0683655  | 2.3217401  |
| C | -3.9095865 | 1.4505500  | 1.9572427  |
| C | -4.5598767 | 1.7664960  | 0.7235658  |
| H | -4.3997770 | 2.9176168  | -1.0858316 |
| C | -2.1247390 | 1.8420627  | 3.7270260  |
| H | -4.4868064 | 0.9316997  | 2.7404918  |
| C | -2.0655475 | 0.3654667  | 4.1460293  |
| H | -1.6063216 | 0.2667327  | 5.1503291  |
| H | -1.4339393 | -0.2216853 | 3.4466716  |
| H | -3.0677348 | -0.1074183 | 4.2030064  |

|   |            |            |            |
|---|------------|------------|------------|
| C | -2.9434926 | 2.6810244  | 4.7300945  |
| H | -1.0884048 | 2.2361973  | 3.7419231  |
| H | -2.5152868 | 2.5931256  | 5.7493767  |
| H | -3.9977413 | 2.3367856  | 4.7756120  |
| H | -2.9492283 | 3.7532562  | 4.4495053  |
| C | -5.9018406 | 1.1680871  | 0.3194280  |
| C | -5.7082072 | 0.0030134  | -0.6748646 |
| H | -5.0825140 | 0.2782000  | -1.5463953 |
| H | -6.6904989 | -0.3487945 | -1.0511566 |
| H | -5.2395501 | -0.8684764 | -0.1657966 |
| C | -6.7777270 | 0.7493589  | 1.5079826  |
| H | -6.4288493 | 1.9786252  | -0.2311499 |
| H | -6.3483431 | -0.1253342 | 2.0395260  |
| H | -7.7820835 | 0.4470889  | 1.1503140  |
| H | -6.9111435 | 1.5750871  | 2.2365063  |
| C | -2.0745031 | 4.2635111  | -0.8085669 |
| C | -2.3697356 | 3.9597127  | -2.2847458 |
| H | -1.7863764 | 4.6516403  | -2.9256304 |
| H | -3.4381924 | 4.1149925  | -2.5418081 |
| H | -2.0902873 | 2.9235693  | -2.5505564 |
| C | -2.5448959 | 5.6881511  | -0.4410868 |
| H | -0.9746669 | 4.2157936  | -0.6778163 |
| H | -2.3274889 | 5.9474058  | 0.6145410  |
| H | -3.6414702 | 5.7863049  | -0.5836865 |
| H | -2.0499561 | 6.4387358  | -1.0907086 |
| H | 0.1908511  | -6.0193512 | -3.0436797 |
| H | 4.9078238  | -2.5342645 | -3.9254348 |
| H | 1.5432125  | -5.3675355 | 1.8042156  |
| C | 0.9748108  | -5.3964761 | -3.5283789 |
| H | 2.5354758  | 0.1181713  | -2.4638253 |
| H | -0.5180045 | -4.0353006 | -4.4062150 |
| H | -1.4280449 | -3.4021363 | 0.4432464  |
| C | 1.4561491  | -4.4018355 | -2.4783394 |
| C | 5.1860088  | -2.1359556 | -2.9274872 |
| C | 0.3222598  | -4.6832082 | -4.7270279 |
| H | -0.0701968 | -5.4180789 | -5.4599728 |
| C | 2.4778946  | -3.4784570 | -2.7628891 |
| C | 1.4898637  | -4.3136966 | 2.1489109  |
| H | 2.9146597  | -5.7810948 | -4.4933530 |
| C | 0.8764486  | -4.3695276 | -1.1982482 |
| C | 2.1025106  | -6.3398691 | -3.9828036 |
| H | 2.5535444  | -6.8731014 | -3.1219723 |
| H | 0.0772431  | -5.0901653 | -0.9664761 |
| C | 3.3610315  | -0.3665003 | -3.0206188 |
| H | 5.9766616  | -1.3753819 | -3.0915342 |
| H | 5.6260741  | -2.9695726 | -2.3438144 |
| C | 2.9197000  | -2.5380412 | -1.8131888 |
| C | -0.8175484 | -3.9497458 | 1.1849028  |
| H | 1.2776240  | -3.4479745 | -0.2128613 |
| C | 1.0422050  | -4.3084804 | 3.1642159  |
| H | 2.5260502  | -3.9320263 | 2.2323295  |
| C | 3.9846589  | -1.5122627 | -2.1993317 |
| C | 2.3116885  | -2.5253260 | -0.5292645 |
| C | 0.6405491  | -3.4707818 | 1.1762970  |
| H | 2.9494673  | -0.7471966 | -3.9797913 |
| H | -0.8990206 | -5.0373382 | 0.9782550  |
| H | 4.1187227  | 0.4076102  | -3.2619454 |
| H | 1.0547478  | -4.0403653 | -5.2591634 |
| H | -1.2744459 | -3.7751785 | 2.1794297  |
| H | 1.7205108  | -7.0977815 | -4.6975389 |
| H | 4.3688344  | -1.0659902 | -1.2589734 |
| H | 0.6422723  | -2.4244011 | 1.5512993  |
| H | 2.9420349  | -3.4828228 | -3.7617114 |
| C | -0.4575699 | -1.0913026 | -3.2913457 |
| C | -1.7714355 | -1.2809883 | -3.0294434 |
| C | -2.4890281 | -0.0306416 | -3.4179365 |
| O | -1.5780184 | 0.8381806  | -3.9700999 |
| C | -0.2681148 | 0.2761920  | -3.8692919 |
| O | -3.6652335 | 0.2543129  | -3.2967412 |
| C | -2.4915846 | -2.4488800 | -2.4474197 |
| H | -1.7908357 | -3.2592015 | -2.1726819 |

|    |            |            |            |
|----|------------|------------|------------|
| H  | 0.3686758  | -1.7884786 | -3.0900882 |
| H  | 0.3368537  | 0.9246579  | -3.1974076 |
| H  | 0.2075690  | 0.2681524  | -4.8758370 |
| Zn | -3.0318143 | -0.5392368 | 1.2841654  |
| H  | -3.2453066 | -2.8407597 | -3.1618004 |
| Br | -4.2310871 | -2.2780299 | 2.2392608  |

### G2<sub>int</sub>; COSMO

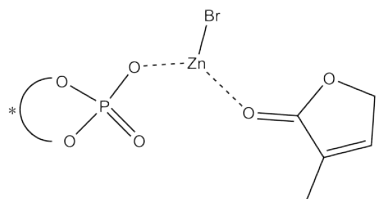

Energy (Hartree) = -7273.266252617

|   |            |            |            |
|---|------------|------------|------------|
| C | 0.3401256  | 1.6758018  | 0.9169699  |
| C | 1.7299007  | 1.6732350  | 1.1191062  |
| C | 2.4006184  | 2.9317119  | 1.3321008  |
| C | 3.8236696  | 3.0513019  | 1.3600182  |
| C | 1.6133677  | 4.1296244  | 1.4866684  |
| C | 2.2707395  | 5.3773448  | 1.7062309  |
| C | 0.1949678  | 4.0370597  | 1.4257267  |
| H | -0.4059843 | 4.9385365  | 1.6225361  |
| C | -0.4569500 | 2.8435182  | 1.1326181  |
| C | 3.0641797  | -1.7149471 | -0.0781939 |
| C | 3.9203481  | -2.0576030 | 0.9626996  |
| H | 4.4958531  | -2.9943732 | 0.8999452  |
| C | 4.0404433  | -1.2567153 | 2.1351278  |
| C | 4.8649366  | -1.6653956 | 3.2265639  |
| C | 3.2820979  | -0.0325187 | 2.2437270  |
| C | 3.3396360  | 0.6901980  | 3.4736295  |
| C | 2.4789107  | 0.3873500  | 1.1216841  |
| C | 2.3726127  | -0.4671726 | 0.0234453  |
| O | -0.3124266 | 0.4991720  | 0.5848953  |
| O | 1.5928309  | -0.0671736 | -1.0464667 |
| P | -0.0561030 | -0.1758304 | -0.9290436 |
| O | -0.6697639 | 0.5715940  | -2.0754656 |
| H | -2.4565078 | -0.7892181 | -2.5936399 |
| O | -0.4220325 | -1.6599100 | -0.6584888 |
| C | 3.6548741  | 5.4552236  | 1.7463230  |
| C | 4.4344873  | 4.2818205  | 1.5592242  |
| H | 1.6542988  | 6.2814112  | 1.8324973  |
| H | 4.1512657  | 6.4239610  | 1.9097095  |
| H | 4.4391884  | 2.1540258  | 1.2053924  |
| H | 5.5331988  | 4.3493483  | 1.5657226  |
| C | 4.1378323  | 0.2558302  | 4.5235091  |
| C | 4.9205325  | -0.9230728 | 4.3969838  |
| H | 2.7342063  | 1.6000384  | 3.5885500  |
| H | 4.1603241  | 0.8284632  | 5.4634136  |
| H | 5.5563810  | -1.2527747 | 5.2327959  |
| H | 5.4472258  | -2.5949365 | 3.1252381  |
| C | -2.7290801 | 3.2017773  | 0.0603420  |
| C | -1.9561843 | 2.8096215  | 1.1827965  |
| C | -4.1219190 | 3.3576151  | 0.2206087  |
| C | -2.5901030 | 2.5145382  | 2.4243200  |
| C | -3.9850895 | 2.6757419  | 2.5278188  |
| C | -4.7685417 | 3.1222960  | 1.4451409  |
| H | -4.7250458 | 3.6960899  | -0.6376271 |
| C | -1.7856219 | 2.0009981  | 3.6185406  |
| H | -4.4727851 | 2.4685429  | 3.4934636  |
| C | -1.8309777 | 0.4602005  | 3.6828959  |
| H | -1.1609123 | 0.0816443  | 4.4824291  |
| H | -1.5122315 | 0.0043926  | 2.7246975  |
| H | -2.8576084 | 0.1028196  | 3.9135214  |

|   |            |            |            |
|---|------------|------------|------------|
| C | -2.2062490 | 2.6284812  | 4.9563312  |
| H | -0.7277038 | 2.2859744  | 3.4443730  |
| H | -1.5165022 | 2.3084598  | 5.7637815  |
| H | -3.2272102 | 2.3168692  | 5.2609623  |
| H | -2.1896813 | 3.7362521  | 4.9090717  |
| C | -6.2656528 | 3.3685664  | 3.3685664  |
| C | -7.0435959 | 2.0769258  | 1.9099564  |
| H | -6.9239920 | 1.3272929  | 1.1016755  |
| H | -8.1284647 | 2.2843773  | 2.0143012  |
| H | -6.7006319 | 1.6152597  | 2.8599446  |
| C | -6.5486285 | 4.4533188  | 2.6558066  |
| H | -6.6308170 | 3.7503102  | 0.6216986  |
| H | -6.2275351 | 4.1258320  | 3.6667379  |
| H | -7.6334543 | 4.6807634  | 2.7069873  |
| H | -6.0095579 | 5.3929371  | 2.4204683  |
| C | -2.0726950 | 3.5099773  | -1.2827108 |
| C | -2.8360329 | 2.9044208  | -2.4705048 |
| H | -2.2639921 | 3.0605192  | -3.4071464 |
| H | -3.8352733 | 3.3679595  | -2.6103821 |
| H | -2.9567395 | 1.8125435  | -2.3399955 |
| C | -1.8741290 | 5.0270632  | -1.4609538 |
| H | -1.0732157 | 3.0293774  | -1.2762054 |
| H | -1.2541269 | 5.4555876  | -0.6483891 |
| H | -2.8491447 | 5.5590640  | -1.4581382 |
| H | -1.3696310 | 5.2449086  | -2.4249476 |
| H | 1.1195561  | -5.9260233 | -4.2899308 |
| H | 5.3935334  | -1.8023885 | -4.2348746 |
| C | 2.3564082  | -6.4753538 | 0.0269252  |
| C | 1.9038616  | -5.2182944 | -4.6363981 |
| H | 2.1780672  | 0.1969278  | -3.5148117 |
| H | 0.4509800  | -3.8859713 | -5.5953046 |
| H | -0.3321601 | -3.7105600 | 0.5419665  |
| C | 2.1959542  | -4.2909124 | -3.4647799 |
| C | 5.3776956  | -1.2380648 | -3.2788302 |
| C | 1.3473016  | -4.4800694 | -5.8634144 |
| H | 1.0587349  | -5.2041368 | -6.6527414 |
| C | 2.8630003  | -3.0674985 | -3.6354339 |
| C | 2.5720334  | -5.6298349 | 0.7128621  |
| H | 3.9793195  | -5.3761477 | -5.3378808 |
| C | 1.8456064  | -4.6637407 | -2.1553289 |
| C | 3.1572680  | -6.0400878 | -4.9959333 |
| H | 3.5303081  | -6.6123839 | -4.1223630 |
| H | 1.3284666  | -5.6262427 | -2.0099444 |
| C | 3.2095991  | -0.0271297 | -3.8492138 |
| H | 5.9509665  | -0.3002193 | -3.4320424 |
| H | 5.9106601  | -1.8470984 | -2.5203987 |
| C | 3.1694540  | -2.2200557 | -2.5553433 |
| C | 0.2342510  | -4.6656035 | 0.4788547  |
| C | 2.1333598  | -3.8596019 | -1.0355069 |
| H | 2.3477240  | -5.9657544 | 1.7463643  |
| H | 3.6586905  | -5.4189926 | 0.6479896  |
| C | 3.9352595  | -0.9281325 | -2.8343410 |
| C | 2.8014880  | -2.6160552 | -1.2397515 |
| C | 1.7423534  | -4.3839024 | 0.3491036  |
| H | 3.1559797  | -0.4999898 | -4.8521957 |
| H | -0.1519042 | -5.3120560 | -0.3401519 |
| H | 3.7505793  | 0.9345063  | -3.9669842 |
| H | 2.0983545  | -3.7941974 | -6.3083091 |
| H | -0.0051450 | -5.1939189 | 1.4245349  |
| H | 2.9393600  | -6.7595868 | -5.8125973 |
| H | 4.0075948  | -0.3620941 | -1.8842677 |
| H | 1.9778033  | -3.5984139 | 1.0930453  |
| H | 3.1601869  | -2.7558836 | -4.6487668 |
| C | -4.4999277 | -0.1341271 | -0.2621028 |
| C | -3.8195415 | -1.0774205 | -0.9631735 |
| C | -3.3991680 | -2.0930667 | 0.0229235  |
| O | -3.8196583 | -1.7599551 | 1.2542097  |
| C | -4.5199467 | -0.5048837 | 1.1779123  |
| O | -2.7646461 | -3.1488288 | -0.1535158 |
| C | -3.4897524 | -1.1622678 | -2.4153713 |
| H | -4.1693167 | -0.5290669 | -3.0156508 |

|    |            |            |            |
|----|------------|------------|------------|
| H  | -4.9572120 | 0.7836573  | -0.6541460 |
| H  | -3.9866206 | 0.2384749  | 1.8107333  |
| H  | -5.5387235 | -0.6418289 | 1.5989126  |
| Zn | -1.1715996 | -3.2163360 | -1.4601596 |
| H  | -3.5577542 | -2.2058468 | -2.7846286 |
| Br | -1.5856684 | -4.5136374 | -3.3071462 |

$G2_{int}$

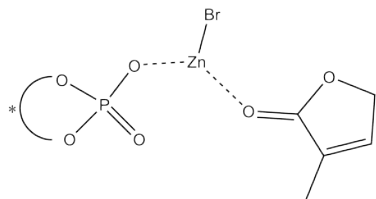

Energy (Hartree) = -7273.256093424

|   |            |            |            |
|---|------------|------------|------------|
| C | 0.3391708  | 1.6653852  | 0.9372486  |
| C | 1.7296482  | 1.6676073  | 1.1360255  |
| C | 2.3972880  | 2.9274192  | 1.3497125  |
| C | 3.8198361  | 3.0507898  | 1.3750778  |
| C | 1.6078353  | 4.1229463  | 1.5086498  |
| C | 2.2626121  | 5.3709735  | 1.7309197  |
| C | 0.1902091  | 4.0268685  | 1.4466376  |
| H | -0.4140255 | 4.9263778  | 1.6426535  |
| C | -0.4591572 | 2.8326575  | 1.1511813  |
| C | 3.0655837  | -1.7119539 | -0.0803484 |
| C | 3.9294757  | -2.0547839 | 0.9538227  |
| H | 4.5061057  | -2.9902896 | 0.8835898  |
| C | 4.0560405  | -1.2578492 | 2.1278321  |
| C | 4.8890193  | -1.6668222 | 3.2119922  |
| C | 3.2948747  | -0.0365886 | 2.2455711  |
| C | 3.3592164  | 0.6823102  | 3.4770593  |
| C | 2.4832608  | 0.3846607  | 1.1302878  |
| C | 2.3726020  | -0.4653953 | 0.0288468  |
| O | -0.3115983 | 0.4875678  | 0.6090809  |
| O | 1.5861296  | -0.0630784 | -1.0344529 |
| P | -0.0603984 | -0.1898625 | -0.9073158 |
| O | -0.7004148 | 0.5436393  | -2.0464843 |
| H | -2.4474790 | -0.7868623 | -2.6106467 |
| O | -0.4016704 | -1.6801151 | -0.6265802 |
| C | 3.6459727  | 5.4522554  | 1.7695120  |
| C | 4.4276099  | 4.2817128  | 1.5774708  |
| H | 1.6439955  | 6.2731543  | 1.8598873  |
| H | 4.1400909  | 6.4217263  | 1.9350007  |
| H | 4.4363306  | 2.1550491  | 1.2166388  |
| H | 5.5261136  | 4.3516479  | 1.5823517  |
| C | 4.1664305  | 0.2475122  | 4.5192417  |
| C | 4.9512079  | -0.9282582 | 4.3837963  |
| H | 2.7523205  | 1.5903013  | 3.5977546  |
| H | 4.1945173  | 0.8179060  | 5.4602975  |
| H | 5.5942047  | -1.2586434 | 5.2137707  |
| H | 5.4730274  | -2.5944636 | 3.1035176  |
| C | -2.7223084 | 3.1890985  | 0.0617747  |
| C | -1.9586290 | 2.8017163  | 1.1922664  |
| C | -4.1154165 | 3.3508279  | 0.2125320  |
| C | -2.6017421 | 2.5181434  | 2.4316306  |
| C | -3.9966954 | 2.6845856  | 2.5246919  |
| C | -4.7711928 | 3.1255739  | 1.4337322  |
| H | -4.7106234 | 3.6878633  | -0.6518642 |
| C | -1.8054186 | 2.0110004  | 3.6339803  |
| H | -4.4910533 | 2.4868969  | 3.4889019  |
| C | -1.8372647 | 0.4699246  | 3.6981576  |
| H | -1.1716629 | 0.0970295  | 4.5038993  |
| H | -1.5052990 | 0.0153081  | 2.7441062  |
| H | -2.8625303 | 0.1027202  | 3.9193908  |
| C | -2.2439523 | 2.6344498  | 4.9676659  |
| H | -0.7485620 | 2.3055371  | 3.4692929  |
| H | -1.5567073 | 2.3244372  | 5.7809797  |
| H | -3.2625675 | 2.3096666  | 5.2666125  |
| H | -2.2421904 | 3.7421847  | 4.9200449  |
| C | -6.2686011 | 3.3777360  | 1.5769471  |
| C | -7.0532802 | 2.0908088  | 1.8890808  |
| H | -6.9274881 | 1.3340033  | 1.0883273  |
| H | -8.1387677 | 2.3000593  | 1.9825838  |
| H | -6.7199043 | 1.6355419  | 2.8455441  |
| C | -6.5564594 | 4.4706777  | 2.6222320  |
| H | -6.6257606 | 3.7540145  | 0.5929808  |
| H | -6.2432820 | 4.1501973  | 3.6377265  |
| H | -7.6406123 | 4.7029053  | 2.6647763  |
| H | -6.0117734 | 5.4061170  | 2.3845163  |
| C | -2.0559466 | 3.4878382  | -1.2785267 |
| C | -2.8184726 | 2.8895990  | -2.4702585 |
| H | -2.2355826 | 3.0328945  | -3.4017976 |
| H | -3.8096083 | 3.3672720  | -2.6216524 |
| H | -2.9532760 | 1.7996735  | -2.3389447 |
| C | -1.8402164 | 5.0024375  | -1.4571042 |
| H | -1.0621231 | 2.9960694  | -1.2676320 |
| H | -1.2165801 | 5.4245988  | -0.6442967 |
| H | -2.8087292 | 5.5461334  | -1.4569357 |
| H | -1.3309780 | 5.2134504  | -2.4198995 |
| H | 1.0973512  | -5.9206719 | -4.2825963 |
| H | 5.3622157  | -1.7901077 | -4.2526753 |
| H | 2.4112560  | -6.4639110 | 0.0329418  |
| C | 1.8794693  | -5.2125723 | -4.6332526 |
| H | 2.1466031  | 0.2041013  | -3.5082211 |
| H | 0.4179820  | -3.8830856 | -5.5814683 |
| H | -0.3352863 | -3.7589853 | 0.5494796  |
| C | 2.1773358  | -4.2855420 | -3.4629552 |
| C | 5.3512263  | -1.2255814 | -3.2967753 |
| C | 1.3135196  | -4.4749310 | -5.8560897 |
| H | 1.0207604  | -5.1989310 | -6.6438141 |
| C | 2.8384564  | -3.0600193 | -3.6368148 |
| C | 2.6139835  | -5.6131325 | 0.7162557  |
| H | 3.9513380  | -5.3674647 | -5.3460812 |
| C | 1.8380010  | -4.6607436 | -2.1512985 |
| C | 3.1318907  | -6.0323227 | -5.0000966 |
| H | 3.5116896  | -6.6036649 | -4.1289857 |
| H | 1.3240432  | -5.6246108 | -2.0041040 |
| C | 3.1757674  | -0.0185029 | -3.8501733 |
| H | 5.9217258  | -0.2868485 | -3.4545076 |
| H | 5.8909999  | -1.8338486 | -2.5427875 |
| C | 3.1514580  | -2.2131798 | -2.5584618 |
| C | 0.2559604  | -4.6990850 | 0.4958229  |
| C | 2.1317086  | -3.8573897 | -1.0328278 |
| H | 2.4047612  | -5.9526378 | 1.7518475  |
| H | 3.6957862  | -5.3821254 | 0.6422617  |
| C | 3.9113661  | -0.9188957 | -2.8421501 |
| C | 2.7956713  | -2.6120898 | -1.2407953 |
| C | 1.7566067  | -4.3851752 | 0.3550855  |
| H | 3.1152807  | -0.4898259 | -4.8534545 |
| H | -0.1225141 | -5.3597732 | -0.3144958 |
| H | 3.7137256  | 0.9443066  | -3.9713190 |
| H | 2.0600954  | -3.7878535 | -6.3066076 |
| H | 0.0364452  | -5.2222253 | 1.4493039  |
| H | 2.9111849  | -6.7521331 | -5.8156704 |
| H | 3.9892962  | -0.3536577 | -1.8920668 |
| H | 1.9807578  | -3.5924447 | 1.0950725  |
| H | 3.1249305  | -2.7452515 | -4.6521095 |
| C | -4.4780064 | -0.1282779 | -0.2834269 |
| C | -3.8074544 | -1.0792879 | -0.9822620 |
| C | -3.3852537 | -2.0931777 | 0.0087668  |
| O | -3.8027192 | -1.7501364 | 1.2404126  |
| C | -4.4889330 | -0.4900419 | 1.1600392  |
| O | -2.7536137 | -3.1472778 | -0.1665197 |
| C | -3.4774870 | -1.1715101 | -2.4337472 |
| H | -4.1611081 | -0.5475130 | -3.0391767 |

|    |            |            |            |
|----|------------|------------|------------|
| H  | -4.9255482 | 0.7941442  | -0.6755868 |
| H  | -3.9425898 | 0.2539356  | 1.7811190  |
| H  | -5.5054969 | -0.6096092 | 1.5925466  |
| Zn | -1.1476203 | -3.2110963 | -1.4764280 |
| H  | -3.5324154 | -2.2180675 | -2.7968616 |
| Br | -1.5877881 | -4.5316130 | -3.2929570 |

### 5.3 Transition States

$D_{TS}$ ; woelfling data

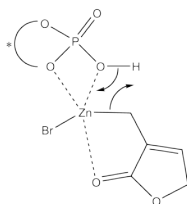

Energy (Hartree) = -7273.196149

|   |           |           |           |
|---|-----------|-----------|-----------|
| C | -0.116468 | 1.617717  | 1.880035  |
| C | 1.279167  | 1.599849  | 1.891212  |
| C | 1.967316  | 2.871181  | 1.888618  |
| C | 3.378679  | 2.993110  | 1.720205  |
| C | 1.193542  | 4.082353  | 2.015239  |
| C | 1.863080  | 5.341900  | 2.045416  |
| C | -0.227168 | 4.011297  | 2.047124  |
| H | -0.803402 | 4.944849  | 2.129604  |
| C | -0.905546 | 2.806221  | 1.922183  |
| C | 2.592710  | -1.741421 | 0.527421  |
| C | 3.649653  | -1.991230 | 1.395147  |
| H | 4.311459  | -2.848708 | 1.200647  |
| C | 3.882629  | -1.185764 | 2.545918  |
| C | 4.905902  | -1.516146 | 3.483818  |
| C | 3.068188  | -0.016231 | 2.773922  |
| C | 3.295337  | 0.746160  | 3.958691  |
| C | 2.030853  | 0.313898  | 1.826957  |
| C | 1.768357  | -0.612019 | 0.809563  |
| O | -0.819852 | 0.411078  | 1.913762  |
| O | 0.656535  | -0.422139 | -0.012823 |
| P | -0.852853 | -0.633449 | 0.675820  |
| O | -1.732679 | 0.074900  | -0.483600 |
| H | -1.531997 | -0.418973 | -1.352732 |
| O | -1.225442 | -2.010010 | 1.095057  |
| C | 3.240186  | 5.421155  | 1.914056  |
| C | 3.998386  | 4.234723  | 1.733131  |
| H | 1.256846  | 6.255271  | 2.151986  |
| H | 3.743600  | 6.399969  | 1.927431  |
| H | 3.979842  | 2.088984  | 1.557775  |
| H | 5.087890  | 4.299934  | 1.590950  |
| C | 4.288964  | 0.389001  | 4.858857  |
| C | 5.109764  | -0.744884 | 4.617516  |
| H | 2.659076  | 1.619238  | 4.158930  |
| H | 4.435973  | 0.986591  | 5.771150  |
| H | 5.896363  | -1.016350 | 5.337594  |
| H | 5.522644  | -2.408430 | 3.294125  |
| C | -3.002205 | 3.172109  | 0.573933  |
| C | -2.391851 | 2.724229  | 1.779682  |
| C | -4.399327 | 3.056628  | 0.446451  |
| C | -3.183788 | 2.159194  | 2.815879  |
| C | -4.573192 | 2.064094  | 2.632162  |
| C | -5.203657 | 2.504612  | 1.455400  |
| H | -4.882155 | 3.396288  | -0.484219 |
| C | -2.573209 | 1.680496  | 4.131578  |
| H | -5.184185 | 1.624549  | 3.436782  |

|   |           |           |           |
|---|-----------|-----------|-----------|
| C | -2.884257 | 0.199986  | 4.414103  |
| H | -2.369700 | -0.135305 | 5.338317  |
| H | -2.545063 | -0.447071 | 3.582211  |
| H | -3.971333 | 0.031408  | 4.561345  |
| C | -3.008627 | 2.585205  | 5.298959  |
| H | -1.471682 | 1.774797  | 4.046921  |
| H | -2.524644 | 2.266894  | 6.245609  |
| H | -4.107285 | 2.545109  | 5.452804  |
| H | -2.735537 | 3.643503  | 5.111144  |
| C | -6.709549 | 2.368633  | 1.271309  |
| C | -7.139305 | 0.890516  | 1.245724  |
| H | -6.596804 | 0.328599  | 0.459294  |
| H | -8.228179 | 0.794698  | 1.052871  |
| H | -6.926357 | 0.394001  | 2.215604  |
| C | -7.489349 | 3.163339  | 2.333281  |
| H | -6.954031 | 2.806109  | 0.277860  |
| H | -7.300653 | 2.765458  | 3.352348  |
| H | -8.582324 | 3.105400  | 2.150445  |
| H | -7.194389 | 4.231831  | 2.332445  |
| C | -2.190611 | 3.762934  | -0.578254 |
| C | -2.582110 | 3.190425  | -1.951301 |
| H | -1.850351 | 3.505165  | -2.722346 |
| H | -3.583527 | 3.538020  | -2.281229 |
| H | -2.603777 | 2.082003  | -1.930184 |
| C | -2.278680 | 5.301047  | -0.589750 |
| H | -1.127375 | 3.491690  | -0.417044 |
| H | -1.946778 | 5.738590  | 0.372754  |
| H | -3.322449 | 5.638693  | -0.762961 |
| H | -1.641868 | 5.725003  | -1.393215 |
| H | 1.521048  | -6.157261 | -3.792896 |
| H | 5.476783  | -1.481925 | -2.500193 |
| H | 2.273405  | -6.301403 | 0.755267  |
| C | 1.986851  | -5.213767 | -4.153011 |
| H | 2.148305  | -0.164072 | -3.833718 |
| H | 0.057472  | -4.428873 | -4.841776 |
| H | -0.902074 | -4.185519 | 0.306952  |
| C | 2.090171  | -4.286924 | -2.948259 |
| C | 4.937984  | -0.806307 | -1.803261 |
| C | 1.069592  | -4.634747 | -5.244536 |
| H | 0.966710  | -5.340569 | -6.094791 |
| C | 2.654755  | -3.002266 | -3.065490 |
| C | 2.192585  | -5.404344 | 1.404562  |
| H | 3.893816  | -4.666582 | -5.105525 |
| C | 1.626915  | -4.687808 | -1.687460 |
| C | 3.375846  | -5.567146 | -4.714191 |
| H | 4.022914  | -6.010278 | -3.930887 |
| H | 1.162160  | -5.681699 | -1.587653 |
| C | 3.216272  | -0.148709 | -3.528910 |
| H | 5.384765  | 0.205667  | -1.887525 |
| H | 5.114798  | -1.170597 | -0.772284 |
| C | 2.794765  | -2.142764 | -1.961796 |
| C | -0.203466 | -4.943131 | 0.706876  |
| C | 1.740109  | -3.867259 | -0.546669 |
| H | 1.835804  | -5.738111 | 2.400513  |
| H | 3.212729  | -4.988924 | 1.528505  |
| C | 3.434686  | -0.765872 | -2.138980 |
| C | 2.357271  | -2.596933 | -0.681972 |
| C | 1.222262  | -4.373761 | 0.797531  |
| H | 3.792904  | -0.673298 | -4.318708 |
| H | -0.251520 | -5.856421 | 0.078261  |
| H | 3.530364  | 0.912854  | -3.524635 |
| H | 1.471149  | -3.680572 | -5.645667 |
| H | -0.563577 | -5.218840 | 1.718747  |
| H | 3.294921  | -6.294735 | -5.548090 |
| H | 2.955302  | -0.075959 | -1.411592 |
| H | 1.174232  | -3.501986 | 1.481699  |
| H | 3.002339  | -2.658747 | -4.051437 |
| C | -1.526382 | -1.775238 | -5.202106 |
| C | -1.030588 | -0.985506 | -4.214737 |
| C | -0.938170 | 0.379847  | -4.797072 |
| O | -1.325605 | 0.383572  | -6.085847 |

|    |           |           |           |
|----|-----------|-----------|-----------|
| C  | -1.702344 | -0.956750 | -6.444998 |
| O  | -0.567949 | 1.398937  | -4.211832 |
| C  | -0.584752 | -1.167317 | -2.809968 |
| H  | 0.386608  | -1.710179 | -2.772321 |
| H  | -1.748772 | -2.850569 | -5.156541 |
| H  | -1.035596 | -1.294558 | -7.270099 |
| H  | -2.742059 | -0.929708 | -6.837390 |
| Zn | 0.120298  | 0.710400  | -2.217871 |
| H  | -1.262454 | -1.865852 | -2.265328 |
| Br | 1.425669  | 2.515258  | -1.618582 |

## G1<sub>TS</sub>; COSMO

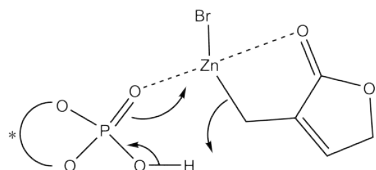

Energy (Hartree) = -7273.206208931

|   |            |            |            |
|---|------------|------------|------------|
| C | 0.2175260  | 2.0226128  | 1.7568255  |
| C | 1.6062371  | 1.9542743  | 1.6680115  |
| C | 2.3239887  | 3.1896173  | 1.4528573  |
| C | 3.7291513  | 3.2435920  | 1.2090576  |
| C | 1.5812755  | 4.4301300  | 1.4465436  |
| C | 2.2848708  | 5.6606716  | 1.2776018  |
| C | 0.1570576  | 4.4083118  | 1.5244368  |
| H | -0.3942964 | 5.3578861  | 1.4415370  |
| C | -0.5523749 | 3.2168309  | 1.6165987  |
| C | 2.6126186  | -1.5714100 | 0.5491645  |
| C | 3.7183514  | -1.8123794 | 1.3568232  |
| H | 4.3243127  | -2.7145320 | 1.1808895  |
| C | 4.0958338  | -0.9196035 | 2.4008839  |
| C | 5.1813357  | -1.2203849 | 3.2774525  |
| C | 3.3753141  | 0.3193985  | 2.5709509  |
| C | 3.7493498  | 1.1801342  | 3.6464209  |
| C | 2.2816105  | 0.6250673  | 1.6815203  |
| C | 1.8758009  | -0.3713893 | 0.7828808  |
| O | -0.4867137 | 0.8420995  | 2.0080743  |
| O | 0.7168320  | -0.1858990 | 0.0120277  |
| P | -0.7065739 | -0.2486388 | 0.8308378  |
| O | -1.8276699 | 0.1311026  | -0.1652150 |
| H | -2.4618490 | -0.8908315 | -0.4071872 |
| O | -0.9556462 | -1.5967288 | 1.5382847  |
| C | 3.6579462  | 5.6790200  | 1.0824888  |
| C | 4.3799273  | 4.4573261  | 1.0301622  |
| H | 1.7085941  | 6.5991080  | 1.2864672  |
| H | 4.1857011  | 6.6355170  | 0.9484682  |
| H | 4.3022886  | 2.3079441  | 1.1565000  |
| H | 5.4641886  | 4.4702964  | 0.8410854  |
| C | 4.7990264  | 0.8500297  | 4.4926261  |
| C | 5.5306174  | -0.3530854 | 4.3018699  |
| H | 3.1839474  | 2.1084373  | 3.8094848  |
| H | 5.0625113  | 1.5239630  | 5.3219316  |
| H | 6.3652351  | -0.5998549 | 4.9755253  |
| H | 5.7302474  | -2.1636737 | 3.1303714  |
| C | -2.5322577 | 3.2667546  | 0.0718937  |
| C | -2.0239608 | 3.0781522  | 1.3913810  |
| C | -3.8712446 | 2.9207699  | -0.1833102 |
| C | -2.8734227 | 2.5859118  | 2.4191764  |
| C | -4.2048328 | 2.2604071  | 2.1070196  |
| C | -4.7187873 | 2.3939244  | 0.8053698  |
| H | -4.2617346 | 3.0254712  | -1.2087765 |
| C | -2.3851826 | 2.4355200  | 3.8583024  |
| H | -4.8541289 | 1.8730779  | 2.9061921  |
| C | -2.6947078 | 1.0519372  | 4.4556908  |
| H | -2.2380006 | 0.9533703  | 5.4619031  |

|   |            |            |            |
|---|------------|------------|------------|
| H | -2.2950859 | 0.2384611  | 3.8183552  |
| H | -3.7858149 | 0.8878083  | 4.5743396  |
| C | -2.9529731 | 3.5668657  | 4.7373850  |
| H | -1.2816693 | 2.5543617  | 3.8534375  |
| H | -2.5662078 | 3.4946231  | 5.7752999  |
| H | -4.0611305 | 3.5162830  | 4.7833666  |
| H | -2.6792295 | 4.5636521  | 4.3356683  |
| C | -6.1106986 | 1.9033295  | 0.4253477  |
| C | -6.0153323 | 0.4653097  | -0.1281082 |
| H | -5.3346068 | 0.4159965  | -1.0017808 |
| H | -7.0132924 | 0.0950365  | -0.4434521 |
| H | -5.6281280 | -0.2264698 | 0.6513822  |
| C | -7.1408087 | 1.9952167  | 1.5590375  |
| H | -6.4629691 | 2.5528288  | -0.4069648 |
| H | -6.9103682 | 1.2858134  | 2.3813245  |
| H | -8.1518732 | 1.7365142  | 1.1842696  |
| H | -7.1849154 | 3.0149257  | 1.9929276  |
| C | -1.6802365 | 3.7807894  | -1.0909140 |
| C | -1.5444076 | 2.7464430  | -2.2237446 |
| H | -0.9036719 | 3.1471819  | -3.0365619 |
| H | -2.5248923 | 2.4774899  | -2.6660478 |
| H | -1.0908925 | 1.8072834  | -1.8528413 |
| C | -2.2177045 | 5.1252645  | -1.6152767 |
| H | -0.6580628 | 3.9701205  | -0.7089967 |
| H | -2.2729397 | 5.8825490  | -0.8062554 |
| H | -3.2367366 | 5.0164707  | -2.0419344 |
| H | -1.5610650 | 5.5239044  | -2.4163330 |
| H | 1.2054119  | -6.0450505 | -3.6238781 |
| H | 4.7298403  | -1.3495717 | -3.8996793 |
| H | 2.0027121  | -6.0129422 | 1.0435754  |
| C | 1.7113921  | -5.1372218 | -4.0195679 |
| H | 1.7183744  | 0.4364443  | -2.2931291 |
| H | -0.2007067 | -4.2841629 | -4.6965999 |
| H | -1.0435946 | -3.9750802 | 0.0770626  |
| C | 1.8955111  | -4.1882565 | -2.8409747 |
| C | 4.8792252  | -0.9917892 | -2.8597001 |
| C | 0.7989802  | -4.5365273 | -5.1040540 |
| H | 0.6544614  | -5.2522439 | -5.9392991 |
| C | 2.5643006  | -2.9584986 | -2.9882752 |
| C | 1.8854315  | -5.0803559 | 1.6343831  |
| H | 3.6141188  | -4.7192093 | -5.0445946 |
| C | 1.4030966  | -4.5173179 | -1.5665666 |
| C | 3.0635696  | -5.5786807 | -4.6080156 |
| H | 3.7115081  | -6.0340809 | -3.8322322 |
| H | 0.8665991  | -5.4716330 | -1.4415972 |
| C | 2.6638084  | 0.2595986  | -2.8437790 |
| H | 5.4410188  | -0.0371634 | -2.9194068 |
| H | 5.5157517  | -1.7331064 | -2.3354726 |
| C | 2.7871021  | -2.0917875 | -1.9023784 |
| C | -0.4484739 | -4.6116375 | 0.7722669  |
| C | 1.5722610  | -3.6705965 | -0.4520552 |
| H | 1.4513796  | -5.3501450 | 2.6191556  |
| H | 2.8966726  | -4.6631453 | 1.8108060  |
| C | 3.5437609  | -0.7818675 | -2.1258930 |
| C | 2.2952073  | -2.4607533 | -0.6174545 |
| C | 0.9858915  | -4.0701110 | 0.8990483  |
| H | 2.4115380  | -0.0737871 | -3.8729673 |
| H | -0.4885280 | -5.6355143 | 0.3473540  |
| H | 3.1954856  | 1.2296016  | -2.9298230 |
| H | 1.2378474  | -3.6101980 | -5.5311875 |
| H | -0.9513870 | -4.6488398 | 1.7597434  |
| H | 2.9159731  | -6.3245123 | -5.4160176 |
| H | 3.7891473  | -0.3657740 | -1.1277884 |
| H | 0.9300660  | -3.1519693 | 1.5169550  |
| H | 2.9463491  | -2.6712629 | -3.9808556 |
| C | -1.1665148 | -2.0728181 | -2.7922098 |
| C | -2.3496635 | -1.6400786 | -2.2946988 |
| C | -2.7979425 | -0.4892917 | -3.1353816 |
| O | -1.8637196 | -0.2817377 | -4.1194438 |
| C | -0.8006006 | -1.2305576 | -3.9726907 |
| O | -3.7972497 | 0.1953389  | -3.0263525 |



|    |            |            |            |
|----|------------|------------|------------|
| C  | -3.1265396 | -2.0153007 | -1.0825343 |
| H  | -3.2140195 | -3.1283909 | -1.0408974 |
| H  | -0.5164947 | -2.8696417 | -2.4025672 |
| H  | 0.1541872  | -0.6831896 | -3.8101798 |
| H  | -0.6976356 | -1.8082322 | -4.9179158 |
| Zn | -2.6235251 | -2.4965338 | 0.9589070  |
| H  | -4.1629204 | -1.6309190 | -1.1475802 |
| Br | -4.0704849 | -3.6027146 | 2.3468052  |

### G1<sub>TS</sub>

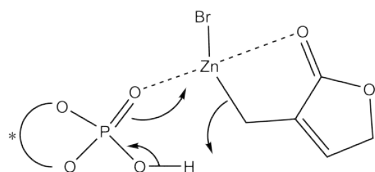

Energy (Hartree) = -7273.195609384  
 number of imaginary frequencies: 1

|   |            |            |            |
|---|------------|------------|------------|
| C | 0.2223765  | 2.0198967  | 1.7495278  |
| C | 1.6115874  | 1.9565873  | 1.6616672  |
| C | 2.3256764  | 3.1949619  | 1.4527689  |
| C | 3.7308379  | 3.2549980  | 1.2117448  |
| C | 1.5788150  | 4.4328124  | 1.4510076  |
| C | 2.2790172  | 5.6655837  | 1.2882987  |
| C | 0.1549401  | 4.4055968  | 1.5285522  |
| H | -0.4004718 | 5.3531827  | 1.4501410  |
| C | -0.5518040 | 3.2121660  | 1.6147610  |
| C | 2.6214279  | -1.5708688 | 0.5473675  |
| C | 3.7277109  | -1.8086245 | 1.3547642  |
| H | 4.3333087  | -2.7112443 | 1.1798535  |
| C | 4.1053815  | -0.9133667 | 2.3962271  |
| C | 5.1910319  | -1.2103748 | 3.2731847  |
| C | 3.3829670  | 0.3245988  | 2.5640761  |
| C | 3.7553757  | 1.1866950  | 3.6387776  |
| C | 2.2897624  | 0.6287649  | 1.6734388  |
| C | 1.8850314  | -0.3693465 | 0.7758543  |
| O | -0.4765930 | 0.8363893  | 1.9940174  |
| O | 0.7309483  | -0.1853449 | -0.0004084 |
| P | -0.6994145 | -0.2442481 | 0.8080460  |
| O | -1.8099153 | 0.1537065  | -0.1927377 |
| H | -2.4648042 | -0.8550955 | -0.4281787 |
| O | -0.9645588 | -1.5952714 | 1.5014290  |
| C | 3.6518353  | 5.6898490  | 1.0956928  |
| C | 4.3777256  | 4.4713536  | 1.0396681  |
| H | 1.6994463  | 6.6019402  | 1.3001334  |
| H | 4.1762513  | 6.6488019  | 0.9667233  |
| H | 4.3063915  | 2.3210002  | 1.1571202  |
| H | 5.4623329  | 4.4886985  | 0.8531556  |
| C | 4.8054389  | 0.8598837  | 4.4850316  |
| C | 5.5391120  | -0.3415539 | 4.2959853  |
| H | 3.1877532  | 2.1138947  | 3.7993862  |
| H | 5.0673240  | 1.5354036  | 5.3134803  |
| H | 6.3740401  | -0.5862587 | 4.9699223  |
| H | 5.7409548  | -2.1533527 | 3.1278447  |
| C | -2.5336149 | 3.2711235  | 0.0728264  |
| C | -2.0228911 | 3.0705321  | 1.3896205  |
| C | -3.8711286 | 2.9217606  | -0.1841807 |
| C | -2.8687769 | 2.5634150  | 2.4130829  |
| C | -4.1992272 | 2.2371834  | 2.0992194  |
| C | -4.7160125 | 2.3837937  | 0.8003522  |
| H | -4.2627554 | 3.0342594  | -1.2082618 |
| C | -2.3797702 | 2.4014803  | 3.8508121  |
| H | -4.8466077 | 1.8408866  | 2.8954334  |
| C | -2.6836728 | 1.0116658  | 4.4362776  |
| H | -2.2291082 | 0.9065086  | 5.4427208  |

|   |            |            |            |
|---|------------|------------|------------|
| H | -2.2786617 | 0.2044505  | 3.7947301  |
| H | -3.7739091 | 0.8402868  | 4.5517838  |
| C | -2.9517079 | 3.5232575  | 4.7392718  |
| H | -1.2766522 | 2.5245590  | 3.8471752  |
| H | -2.5658012 | 3.4442065  | 5.7769949  |
| H | -4.0595819 | 3.4691291  | 4.7840058  |
| H | -2.6821541 | 4.5242524  | 4.3457844  |
| C | -6.1102689 | 1.9004510  | 0.4196946  |
| C | -6.0228236 | 0.4692846  | -0.1517707 |
| H | -5.3475857 | 0.4286327  | -1.0300965 |
| H | -7.0235519 | 0.1067139  | -0.4670314 |
| H | -5.6367357 | -0.2336052 | 0.6183601  |
| C | -7.1355390 | 1.9825935  | 1.5584296  |
| H | -6.4635937 | 2.5615289  | -0.4030151 |
| H | -6.9062383 | 1.2605548  | 2.3699057  |
| H | -8.1494640 | 1.7337663  | 1.1849362  |
| H | -7.1729285 | 2.9963081  | 2.0064302  |
| C | -1.6864817 | 3.8028659  | -1.0856116 |
| C | -1.5440753 | 2.7823741  | -2.2300602 |
| H | -0.9088129 | 3.1975968  | -3.0397606 |
| H | -2.5217469 | 2.5075421  | -2.6747383 |
| H | -1.0800591 | 1.8439708  | -1.8704307 |
| C | -2.2346019 | 5.1489947  | -1.5943680 |
| H | -0.6651809 | 3.9960642  | -0.7030677 |
| H | -2.2971655 | 5.8966029  | -0.7770110 |
| H | -3.2526754 | 5.0375152  | -2.0220381 |
| H | -1.5819454 | 5.5621924  | -2.3911881 |
| H | 1.1865376  | -6.0519858 | -3.6079378 |
| H | 4.7396484  | -1.3753796 | -3.9000273 |
| H | 2.0379946  | -5.9916762 | 1.0747837  |
| C | 1.7005233  | -5.1497098 | -4.0065767 |
| H | 1.7286721  | 0.4260768  | -2.3072577 |
| H | -0.2027390 | -4.2826354 | -4.6908705 |
| H | -1.0422392 | -4.0072880 | 0.0932293  |
| C | 1.8902101  | -4.1974661 | -2.8314484 |
| C | 4.8873118  | -1.0124060 | -2.8616027 |
| C | 0.7947407  | -4.5473967 | -5.0955603 |
| H | 0.6443044  | -5.2653034 | -5.9278134 |
| C | 2.5635894  | -2.9713868 | -2.9839411 |
| C | 1.9041097  | -5.0560436 | 1.6571965  |
| H | 3.6092732  | -4.7523945 | -5.0282819 |
| C | 1.3999185  | -4.5203769 | -1.5550595 |
| C | 3.0500599  | -5.6052330 | -4.5899750 |
| H | 3.6925815  | -6.0614760 | -3.8105355 |
| H | 0.8603795  | -5.4723211 | -1.4256914 |
| C | 2.6747416  | 0.2447632  | -2.8550433 |
| H | 5.4524411  | -0.0601276 | -2.9262490 |
| H | 5.5210249  | -1.7529616 | -2.3332528 |
| C | 2.7915448  | -2.1022248 | -1.9014799 |
| C | -0.4363049 | -4.6288846 | 0.7894933  |
| C | 1.5743698  | -3.6719464 | -0.4429836 |
| H | 1.4716107  | -5.3247291 | 2.6428955  |
| H | 2.9083016  | -4.6228207 | 1.8341900  |
| C | 3.5512970  | -0.7951895 | -2.1311650 |
| C | 2.3012440  | -2.4652039 | -0.6145607 |
| C | 0.9906168  | -4.0663964 | 0.9110906  |
| H | 2.4232956  | -0.0923118 | -3.8832378 |
| H | -0.4584283 | -5.6604995 | 0.3816209  |
| H | 3.2077049  | 1.2136421  | -2.9448879 |
| H | 1.2421799  | -3.6273340 | -5.5271766 |
| H | -0.9417069 | -4.6563900 | 1.7758731  |
| H | 2.8997138  | -6.3533192 | -5.3953246 |
| H | 3.7963656  | -0.3746410 | -1.1348790 |
| H | 0.9205497  | -3.1426921 | 1.5193545  |
| H | 2.9454409  | -2.6888744 | -3.9779831 |
| C | -1.1887009 | -2.0699791 | -2.8015463 |
| C | -2.3649304 | -1.6217095 | -2.3026263 |
| C | -2.7971073 | -0.4572785 | -3.1374373 |
| O | -1.8599334 | -0.2631123 | -4.1235948 |
| C | -0.8125964 | -1.2255665 | -3.9791349 |
| O | -3.7816683 | 0.2427043  | -3.0168779 |

|    |            |            |            |
|----|------------|------------|------------|
| C  | -3.1464988 | -1.9829520 | -1.0900705 |
| H  | -3.2211523 | -3.0959399 | -1.0271911 |
| H  | -0.5467230 | -2.8739209 | -2.4129797 |
| H  | 0.1507543  | -0.6940988 | -3.8119802 |
| H  | -0.7145303 | -1.8018471 | -4.9264521 |
| Zn | -2.6891127 | -2.4182941 | 0.9772467  |
| H  | -4.1841645 | -1.6047817 | -1.1684814 |
| Br | -4.1176678 | -3.5421014 | 2.3510580  |

## G2<sub>TS</sub>; COSMO

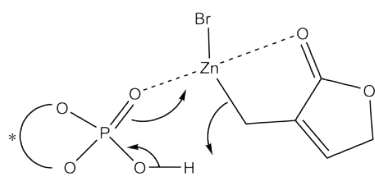

Energy (Hartree) = -7273.225607762

|   |            |            |            |
|---|------------|------------|------------|
| C | 0.4605299  | 1.6521357  | 0.8851073  |
| C | 1.8587508  | 1.6642781  | 0.7948531  |
| C | 2.5288868  | 2.9386172  | 0.6930187  |
| C | 3.9235857  | 3.0591624  | 0.4099422  |
| C | 1.7591948  | 4.1472115  | 0.8483824  |
| C | 2.4163546  | 5.4126535  | 0.7776930  |
| C | 0.3551460  | 4.0540590  | 1.0500943  |
| H | -0.2219067 | 4.9784637  | 1.2054509  |
| C | -0.3207447 | 2.8370841  | 1.0351844  |
| C | 3.0839880  | -1.7874133 | -0.3469512 |
| C | 4.1797556  | -1.9718157 | 0.4903810  |
| H | 4.8025467  | -2.8703899 | 0.3639869  |
| C | 4.4960671  | -1.0599819 | 1.5376943  |
| C | 5.5718271  | -1.3170569 | 2.4404920  |
| C | 3.6998119  | 0.1310244  | 1.7130098  |
| C | 3.9854723  | 0.9811939  | 2.8231899  |
| C | 2.6333310  | 0.3940457  | 0.7778543  |
| C | 2.3354741  | -0.5856493 | -0.1689993 |
| O | -0.2201840 | 0.4290786  | 0.9074373  |
| O | 1.2566067  | -0.3607890 | -1.0356418 |
| P | -0.2372897 | -0.5396899 | -0.4153442 |
| O | -1.1819809 | 0.0153316  | -1.5355902 |
| H | -2.0577612 | -0.6908535 | -1.6070138 |
| O | -0.5862747 | -1.9492267 | 0.0536454  |
| C | 3.7776141  | 5.4930160  | 0.5275445  |
| C | 4.5306633  | 4.3046285  | 0.3272961  |
| H | 1.8151099  | 6.3256891  | 0.9113183  |
| H | 4.2735800  | 6.4737261  | 0.4679364  |
| H | 4.5188820  | 2.1511961  | 0.2423119  |
| H | 5.6052284  | 4.3711416  | 0.0984578  |
| C | 5.0279128  | 0.6929660  | 3.6936928  |
| C | 5.8385566  | -0.4569559 | 3.4952036  |
| H | 3.3617118  | 1.8699218  | 2.9930909  |
| H | 5.2240425  | 1.3589794  | 4.5477858  |
| H | 6.6668270  | -0.6704703 | 4.1878693  |
| H | 6.1779297  | -2.2241329 | 2.2900993  |
| C | -2.6457943 | 3.3017968  | 0.1731388  |
| C | -1.8083452 | 2.8530790  | 1.2291381  |
| C | -3.9967996 | 3.5867946  | 0.4555799  |
| C | -2.3566970 | 2.6017358  | 2.5172535  |
| C | -3.7149302 | 2.8953238  | 2.7446577  |
| C | -4.5456368 | 3.4263306  | 1.7386572  |
| H | -4.6434377 | 3.9729385  | -0.3495479 |
| C | -1.5077472 | 2.0296736  | 3.6505183  |
| H | -4.1278402 | 2.7359450  | 3.7542074  |
| C | -1.8959522 | 0.5665187  | 3.9383798  |
| H | -1.2288970 | 0.1277231  | 4.7086277  |
| H | -1.8161282 | -0.0563529 | 3.0257271  |

|   |            |            |            |
|---|------------|------------|------------|
| H | -2.9363069 | 0.4924025  | 4.3205978  |
| C | -1.5593543 | 2.8928596  | 4.9222773  |
| H | -0.4531650 | 2.0253178  | 3.3067884  |
| H | -0.8700128 | 2.4902167  | 5.6924825  |
| H | -2.5756981 | 2.9117991  | 5.3680717  |
| H | -1.2639780 | 3.9404760  | 4.7102569  |
| C | -5.9828499 | 3.8445629  | 2.0310467  |
| C | -6.8821373 | 2.6518982  | 2.4003639  |
| H | -6.9246318 | 1.9083011  | 1.5792877  |
| H | -7.9200947 | 2.9883960  | 2.6007207  |
| H | -6.5179775 | 2.1366840  | 3.3140439  |
| C | -6.0370994 | 4.9377673  | 3.1140175  |
| H | -6.3844809 | 4.2839815  | 1.0917182  |
| H | -5.6727462 | 4.5567721  | 4.0909471  |
| H | -7.0773644 | 5.2941773  | 3.2618778  |
| H | -5.4094428 | 5.8089101  | 2.8382490  |
| C | -2.1126958 | 3.5037011  | -1.2444729 |
| C | -2.9797511 | 2.7823853  | -2.2906715 |
| H | -2.5093042 | 2.8477829  | -3.2927872 |
| H | -3.9930026 | 3.2281916  | -2.3700213 |
| H | -3.0882295 | 1.7106630  | -2.0380743 |
| C | -1.9596960 | 4.9968082  | -1.5882729 |
| H | -1.1047340 | 3.0414994  | -1.2858964 |
| H | -1.2729259 | 5.5098094  | -0.8860360 |
| H | -2.9387572 | 5.5185206  | -1.5430709 |
| H | -1.5550597 | 5.1236311  | -2.6136019 |
| H | 0.8979956  | -6.5423156 | -3.7864120 |
| H | 4.5359675  | -1.9855384 | -4.8805870 |
| H | 3.0266345  | -6.4532303 | 0.2955799  |
| C | 1.4199078  | -5.7344518 | -4.3442867 |
| H | 1.3379150  | -0.2422604 | -3.6190004 |
| H | -0.4562659 | -4.7203420 | -4.8478343 |
| H | -0.0794971 | -4.2261494 | 0.7352705  |
| C | 1.8541787  | -4.7034817 | -3.3108326 |
| C | 4.6523671  | -1.3529528 | -3.9758337 |
| C | 0.4212784  | -5.1599703 | -5.3629297 |
| H | 0.0606618  | -5.9562043 | -6.0465564 |
| C | 2.3420257  | -3.4422997 | -3.6938449 |
| C | 3.1749426  | -5.5138763 | 0.8684501  |
| H | 3.2084824  | -5.5899331 | -5.6120152 |
| C | 1.7950733  | -4.9931263 | -1.9386516 |
| C | 2.6425219  | -6.3583215 | -5.0437343 |
| H | 3.3391184  | -6.8134123 | -4.3106013 |
| H | 1.4006205  | -5.9729272 | -1.6272483 |
| C | 2.2970065  | -0.3995177 | -4.1501476 |
| H | 5.0798043  | -0.3802527 | -4.2971167 |
| H | 5.3884223  | -1.8502842 | -3.3117931 |
| C | 2.7490207  | -2.4800388 | -2.7540567 |
| C | 0.6932684  | -4.9972949 | 0.9105730  |
| C | 2.1874288  | -4.0700854 | -0.9519817 |
| H | 3.1456303  | -5.7681304 | 1.9484432  |
| H | 4.1918367  | -5.1397995 | 0.6311840  |
| C | 3.3039932  | -1.1487419 | -3.2594156 |
| C | 2.6725372  | -2.7970402 | -1.3684264 |
| C | 2.0877197  | -4.4786674 | 0.5190016  |
| H | 2.0857911  | -0.9574171 | -5.0862444 |
| H | 0.4027965  | -5.9012204 | 0.3378133  |
| H | 2.6979491  | 0.5938632  | -4.4401896 |
| H | 0.8861888  | -4.3722250 | -5.9924369 |
| H | 0.6738352  | -5.2620625 | 1.9879671  |
| H | 2.3312735  | -7.1471214 | -5.7600899 |
| H | 3.5062189  | -0.5044374 | -2.3798125 |
| H | 2.2754907  | -3.5759498 | 1.1345753  |
| H | 2.4084163  | -3.1955881 | -4.7655013 |
| C | -4.7180912 | -0.0013992 | 0.3278370  |
| C | -4.0624327 | -1.0584739 | -0.2252120 |
| C | -3.8436428 | -2.0188007 | 0.8787442  |
| O | -4.3931024 | -1.5843984 | 2.0222098  |
| C | -4.9629958 | -0.2800407 | 1.7758204  |
| O | -3.2070004 | -3.0820674 | 0.8088342  |
| C | -3.4800345 | -1.3841629 | -1.5423685 |

|    |            |            |            |
|----|------------|------------|------------|
| H  | -3.6534003 | -0.5912181 | -2.2968413 |
| H  | -5.0254506 | 0.9319021  | -0.1620217 |
| H  | -4.4546573 | 0.4461982  | 2.4463037  |
| H  | -6.0385256 | -0.3093350 | 2.0529426  |
| Zn | -2.0406643 | -2.9624960 | -0.9702783 |
| H  | -3.9746065 | -2.2839053 | -1.9787743 |
| Br | -1.8550824 | -4.9485040 | -2.1464437 |

## G2TS



Energy (Hartree) = -7273.215078101  
number of imaginary frequencies: 1

|   |            |            |            |
|---|------------|------------|------------|
| C | 0.4583152  | 1.6483211  | 0.8884272  |
| C | 1.8570386  | 1.6609810  | 0.8021039  |
| C | 2.5271690  | 2.9352639  | 0.6987999  |
| C | 3.9225851  | 3.0547667  | 0.4197824  |
| C | 1.7578886  | 4.1446365  | 0.8482381  |
| C | 2.4160362  | 5.4089177  | 0.7758851  |
| C | 0.3535915  | 4.0517279  | 1.0460467  |
| H | -0.2253761 | 4.9756818  | 1.1973791  |
| C | -0.3219803 | 2.8348576  | 1.0333023  |
| C | 3.0840317  | -1.7891027 | -0.3402230 |
| C | 4.1780125  | -1.9738940 | 0.4990974  |
| H | 4.7994337  | -2.8732748 | 0.3718337  |
| C | 4.4936124  | -1.0633591 | 1.5474733  |
| C | 5.5680610  | -1.3203257 | 2.4511522  |
| C | 3.6984248  | 0.1282824  | 1.7222178  |
| C | 3.9851388  | 0.9788939  | 2.8314342  |
| C | 2.6321992  | 0.3911843  | 0.7870294  |
| C | 2.3349939  | -0.5878918 | -0.1605680 |
| O | -0.2242136 | 0.4279152  | 0.9128504  |
| O | 1.2554698  | -0.3626230 | -1.0256706 |
| P | -0.2365227 | -0.5510732 | -0.4041811 |
| O | -1.1821917 | 0.0045167  | -1.5270774 |
| H | -2.0402322 | -0.6988422 | -1.6018807 |
| O | -0.5827212 | -1.9579303 | 0.0665210  |
| C | 3.7776172  | 5.4882499  | 0.5301981  |
| C | 4.5303094  | 4.2993357  | 0.3359885  |
| H | 1.8145831  | 6.3225506  | 0.9044602  |
| H | 4.2739655  | 6.4686281  | 0.4693342  |
| H | 4.5169652  | 2.1454331  | 0.2572800  |
| H | 5.6056387  | 4.3644538  | 0.1106557  |
| C | 5.0271642  | 0.6907147  | 3.7017995  |
| C | 5.8358737  | -0.4600758 | 3.5048090  |
| H | 3.3622108  | 1.8685614  | 2.9990664  |
| H | 5.2242501  | 1.3577043  | 4.5548576  |
| H | 6.6636894  | -0.6742859 | 4.1977180  |
| H | 6.1726972  | -2.2285281 | 2.3017966  |
| C | -2.6466071 | 3.2924412  | 0.1664513  |
| C | -1.8095623 | 2.8524272  | 1.2260912  |
| C | -3.9974727 | 3.5791615  | 0.4466723  |
| C | -2.3577988 | 2.6109521  | 2.5159520  |
| C | -3.7162816 | 2.9047186  | 2.7402089  |
| C | -4.5469744 | 3.4270362  | 1.7301054  |
| H | -4.6433265 | 3.9602779  | -0.3615408 |
| C | -1.5076160 | 2.0495290  | 3.6536365  |
| H | -4.1290964 | 2.7528718  | 3.7509447  |
| C | -1.8902347 | 0.5873518  | 3.9528280  |
| H | -1.2216080 | 0.1567133  | 4.7261492  |
| H | -1.8081262 | -0.0433994 | 3.0460788  |

|   |            |            |            |
|---|------------|------------|------------|
| H | -2.9298873 | 0.5113518  | 4.3366026  |
| C | -1.5610652 | 2.9230682  | 4.9180966  |
| H | -0.4533014 | 2.0459406  | 3.3092491  |
| H | -0.8706437 | 2.5293377  | 5.6918330  |
| H | -2.5767552 | 2.9432954  | 5.3653368  |
| H | -1.2693369 | 3.9698665  | 4.6979085  |
| C | -5.9850550 | 3.8450210  | 2.0185919  |
| C | -6.8825512 | 2.6537159  | 2.3963439  |
| H | -6.9213991 | 1.9026939  | 1.5818693  |
| H | -7.9218313 | 2.9879863  | 2.5933138  |
| H | -6.5179947 | 2.1464699  | 3.3142854  |
| C | -6.0426568 | 4.9472245  | 3.0919399  |
| H | -6.3871688 | 4.2761762  | 1.0754294  |
| H | -5.6776433 | 4.5760688  | 4.0722552  |
| H | -7.0832250 | 5.3037165  | 3.2370485  |
| H | -5.4158136 | 5.8164755  | 2.8094821  |
| C | -2.1128474 | 3.4823214  | -1.2525349 |
| C | -2.9794926 | 2.7526766  | -2.2930764 |
| H | -2.5077051 | 2.8074492  | -3.2950024 |
| H | -3.9920137 | 3.1991313  | -2.3791795 |
| H | -3.0887881 | 1.6834385  | -2.0312319 |
| C | -1.9578617 | 4.9722279  | -1.6082545 |
| H | -1.1055780 | 3.0184937  | -1.2897120 |
| H | -1.2695190 | 5.4895495  | -0.9109599 |
| H | -2.9355027 | 5.4967693  | -1.5666307 |
| H | -1.5534364 | 5.0908158  | -2.6345187 |
| H | 0.8641359  | -6.5105268 | -3.7985697 |
| H | 4.5368825  | -1.9741243 | -4.8710596 |
| H | 3.0232942  | -6.4653057 | 0.2651201  |
| C | 1.3950388  | -5.7065498 | -4.3534932 |
| H | 1.3444357  | -0.2217924 | -3.6064246 |
| H | -0.4709959 | -4.6720646 | -4.8502446 |
| H | -0.0684892 | -4.2251472 | 0.7563670  |
| C | 1.8404586  | -4.6850199 | -3.3157338 |
| C | 4.6548216  | -1.3448097 | -3.9643965 |
| C | 0.4012234  | -5.1179969 | -5.3684545 |
| H | 0.0315335  | -5.9079187 | -6.0544133 |
| C | 2.3332551  | -3.4244073 | -3.6925952 |
| C | 3.1798918  | -5.5319927 | 0.8452251  |
| C | 3.1857331  | -5.5752243 | -5.6197349 |
| H | 1.7862210  | -4.9831112 | -1.9454981 |
| C | 2.6113970  | -6.3398920 | -5.0550011 |
| H | 3.3038040  | -6.8041996 | -4.3239062 |
| H | 1.3867850  | -5.9622657 | -1.6389949 |
| C | 2.3037534  | -0.3803610 | -4.1363492 |
| H | 5.0872634  | -0.3732581 | -4.2825196 |
| H | 5.3879411  | -1.8484786 | -3.3022012 |
| C | 2.7469400  | -2.4695969 | -2.7489982 |
| C | 0.7008044  | -5.0036355 | 0.9119940  |
| C | 2.1868563  | -4.0688908 | -0.9544811 |
| H | 3.1587351  | -5.7964901 | 1.9229178  |
| H | 4.1967483  | -5.1614949 | 0.6020067  |
| C | 3.3067305  | -1.1379953 | -3.2484117 |
| C | 2.6732137  | -2.7946620 | -1.3652096 |
| C | 2.0946968  | -4.4888102 | 0.5138296  |
| H | 2.0905751  | -0.9327848 | -5.0751071 |
| H | 0.3966802  | -5.8973863 | 0.3307856  |
| H | 2.7085965  | 0.6126826  | -4.4220623 |
| H | 0.8730320  | -4.3331697 | -5.9964986 |
| H | 0.6892353  | -5.2818112 | 1.9860271  |
| H | 2.2931095  | -7.1225196 | -5.7749538 |
| H | 3.5112344  | -0.4980877 | -2.3659423 |
| H | 2.2915939  | -3.5925801 | 1.1361014  |
| H | 2.3958442  | -3.1714626 | -4.7628893 |
| C | -4.6978881 | -0.0183093 | 0.3283369  |
| C | -4.0537550 | -1.0839839 | -0.2219457 |
| C | -3.8315456 | -2.0385708 | 0.8899637  |
| O | -4.3751148 | -1.5910844 | 2.0335083  |
| C | -4.9333890 | -0.2855286 | 1.7811035  |
| O | -3.1989060 | -3.1013814 | 0.8247714  |
| C | -3.4772002 | -1.4226940 | -1.5357122 |

|    |            |            |            |
|----|------------|------------|------------|
| H  | -3.6513959 | -0.6386644 | -2.2992171 |
| H  | -4.9989150 | 0.9154393  | -0.1644091 |
| H  | -4.4143213 | 0.4420953  | 2.4420411  |
| H  | -6.0074996 | -0.3006625 | 2.0672025  |
| Zn | -2.0261895 | -3.0022652 | -0.9532957 |
| H  | -3.9641753 | -2.3325119 | -1.9588116 |
| Br | -1.8442531 | -4.9597774 | -2.1610738 |

### G3<sub>TS</sub>; woelfling data

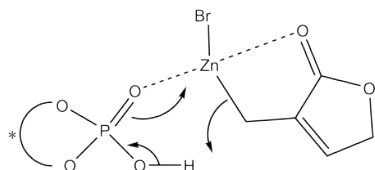

Energy (Hartree) = -7273.184643

|   |           |           |           |
|---|-----------|-----------|-----------|
| C | 0.651627  | 1.978905  | 0.911065  |
| C | 2.051766  | 2.031024  | 0.965549  |
| C | 2.666542  | 3.334266  | 0.997217  |
| C | 4.074546  | 3.521494  | 0.860391  |
| C | 1.825884  | 4.501100  | 1.125044  |
| C | 2.433299  | 5.792509  | 1.155439  |
| C | 0.410395  | 4.348709  | 1.188768  |
| H | -0.212822 | 5.245915  | 1.324196  |
| C | -0.211207 | 3.111598  | 1.043936  |
| C | 3.286358  | -1.498063 | 0.000261  |
| C | 4.242899  | -1.720670 | 0.984264  |
| H | 4.786166  | -2.676378 | 0.990694  |
| C | 4.503075  | -0.781141 | 2.021971  |
| C | 5.440166  | -1.081293 | 3.055287  |
| C | 3.769469  | 0.462403  | 2.074086  |
| C | 3.962344  | 1.312881  | 3.203600  |
| C | 2.854030  | 0.767264  | 1.000199  |
| C | 2.668442  | -0.209379 | 0.019489  |
| O | 0.028398  | 0.734016  | 0.774676  |
| O | 1.763420  | 0.086227  | -1.018742 |
| P | 0.227262  | -0.137821 | -0.586394 |
| O | -0.499802 | 0.595825  | -1.814135 |
| H | -1.417805 | 0.243138  | -1.909620 |
| O | -0.182638 | -1.558294 | -0.278891 |
| C | 3.806285  | 5.939266  | 1.029654  |
| C | 4.629755  | 4.793159  | 0.869808  |
| H | 1.784302  | 6.676070  | 1.260795  |
| H | 4.259093  | 6.942365  | 1.039764  |
| H | 4.719086  | 2.641117  | 0.727878  |
| H | 5.716706  | 4.913844  | 0.745386  |
| C | 4.871487  | 0.982757  | 4.199418  |
| C | 5.630378  | -0.214690 | 4.119779  |
| H | 3.376028  | 2.238254  | 3.285577  |
| H | 5.000173  | 1.653593  | 5.062376  |
| H | 6.353241  | -0.461596 | 4.912024  |
| H | 5.996942  | -2.029649 | 2.997144  |
| C | -2.469729 | 3.444390  | -0.069225 |
| C | -1.708180 | 2.966038  | 1.033501  |
| C | -3.875462 | 3.347915  | -0.016788 |
| C | -2.378339 | 2.379314  | 2.147693  |
| C | -3.783054 | 2.300589  | 2.139789  |
| C | -4.561166 | 2.793733  | 1.075519  |
| H | -4.467959 | 3.735520  | -0.861702 |
| C | -1.607786 | 1.935092  | 3.390777  |
| H | -4.287804 | 1.842988  | 3.003237  |
| C | -2.139242 | 0.636271  | 4.014560  |
| H | -1.462057 | 0.296867  | 4.824683  |
| H | -2.219113 | -0.181512 | 3.270865  |
| H | -3.141846 | 0.773611  | 4.470073  |

|   |           |           |           |
|---|-----------|-----------|-----------|
| C | -1.572748 | 3.082159  | 4.421557  |
| H | -0.558356 | 1.741482  | 3.088371  |
| H | -0.980457 | 2.794506  | 5.315219  |
| H | -2.599164 | 3.336192  | 4.760104  |
| H | -1.123898 | 4.001672  | 3.993143  |
| C | -6.089802 | 2.758545  | 1.090724  |
| C | -6.657194 | 1.348692  | 0.855345  |
| H | -6.338864 | 0.947087  | -0.125655 |
| H | -7.766524 | 1.363546  | 0.875281  |
| H | -6.302883 | 0.635018  | 1.623962  |
| C | -6.681991 | 3.364394  | 2.374387  |
| H | -6.423693 | 3.393205  | 0.239581  |
| H | -6.396711 | 2.775735  | 3.270848  |
| H | -7.790516 | 3.359294  | 2.322177  |
| H | -6.347547 | 4.409285  | 2.531244  |
| C | -1.828601 | 4.106000  | -1.289286 |
| C | -2.336768 | 3.522083  | -2.618791 |
| H | -1.786549 | 3.965151  | -3.473815 |
| H | -3.414758 | 3.730396  | -2.778138 |
| H | -2.194480 | 2.424840  | -2.658289 |
| C | -2.042077 | 5.632369  | -1.255439 |
| H | -0.736632 | 3.914753  | -1.243825 |
| H | -1.641888 | 6.082656  | -0.325204 |
| H | -3.123441 | 5.879638  | -1.300357 |
| H | -1.544992 | 6.124988  | -2.116676 |
| H | 0.872504  | -6.408148 | -3.052695 |
| H | 5.043814  | -2.469253 | -4.360862 |
| H | 2.885258  | -5.813430 | 1.303378  |
| C | 1.441507  | -5.690625 | -3.684494 |
| H | 2.084720  | -0.133302 | -3.590464 |
| H | -0.397184 | -4.660544 | -4.312756 |
| H | -0.336988 | -4.051480 | 0.595780  |
| C | 1.929414  | -4.587892 | -2.752700 |
| C | 5.196338  | -1.764886 | -3.516411 |
| C | 0.477827  | -5.170257 | -4.764486 |
| H | 0.102898  | -6.006103 | -5.391128 |
| C | 2.603894  | -3.449294 | -3.223597 |
| C | 2.858466  | -4.797071 | 1.749243  |
| H | 3.233119  | -5.800723 | -4.954125 |
| C | 1.728533  | -4.694345 | -1.369595 |
| C | 2.622819  | -6.460203 | -4.302369 |
| H | 3.290682  | -6.864312 | -3.515307 |
| H | 1.186913  | -5.574123 | -0.990469 |
| C | 3.039216  | -0.505348 | -4.010364 |
| H | 5.805284  | -0.916279 | -3.890717 |
| H | 5.783693  | -2.298203 | -2.741891 |
| C | 3.068305  | -2.442714 | -2.355926 |
| C | 0.428080  | -4.552037 | 1.214524  |
| C | 2.158755  | -3.717053 | -0.454303 |
| H | 2.586436  | -4.905434 | 2.819505  |
| H | 3.883411  | -4.383630 | 1.698327  |
| C | 3.849564  | -1.273977 | -2.952001 |
| C | 2.848006  | -2.570788 | -0.955461 |
| C | 1.816977  | -3.924393 | 1.022114  |
| H | 2.802245  | -1.143756 | -4.886889 |
| H | 0.420593  | -5.633199 | 0.963314  |
| H | 3.612964  | 0.367518  | -4.384343 |
| H | 0.976055  | -4.446352 | -5.442703 |
| H | 0.095316  | -4.458010 | 2.265830  |
| H | 2.264773  | -7.309364 | -4.920894 |
| H | 4.081624  | -0.564222 | -2.131524 |
| H | 1.796670  | -2.924382 | 1.503775  |
| H | 2.784261  | -3.339679 | -4.305069 |
| C | -5.194228 | -2.536225 | -2.007869 |
| C | -4.373799 | -1.667231 | -1.363893 |
| C | -5.000025 | -1.376057 | -0.040483 |
| O | -6.189017 | -2.032335 | 0.057100  |
| C | -6.361096 | -2.843861 | -1.115120 |
| O | -4.515269 | -0.703099 | 0.853679  |
| C | -3.025000 | -1.121583 | -1.563141 |
| H | -3.069955 | -0.011680 | -1.439819 |

|    |           |           |           |
|----|-----------|-----------|-----------|
| H  | -5.043719 | -2.996424 | -2.994212 |
| H  | -7.351773 | -2.617999 | -1.566866 |
| H  | -6.372356 | -3.909428 | -0.788567 |
| Zn | -2.197054 | -1.856296 | 0.154971  |
| H  | -2.550445 | -1.414925 | -2.520563 |
| Br | -2.586054 | -3.026530 | 2.108121  |

---

## 6 Structures of the proposal in the main text of the paper

### 6.1 Educt Complexes 14

#### 14 $\alpha$ -ma

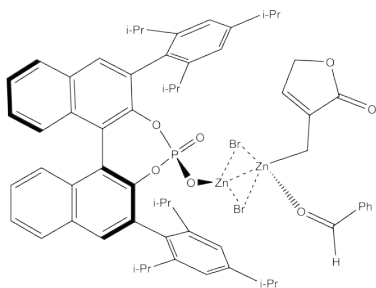

Energy (Hartree) = -11969.99132738

|   |            |            |            |
|---|------------|------------|------------|
| C | 0.0163666  | 2.0803762  | 88.7292276 |
| C | 0.7661565  | 0.9107154  | 88.5444089 |
| C | 0.2118237  | -0.3317098 | 89.0266963 |
| C | 0.9534342  | -1.5515135 | 89.0527293 |
| C | -1.1396659 | -0.3466495 | 89.5336906 |
| C | -1.7061626 | -1.5799602 | 89.9743585 |
| C | -1.8714979 | 0.8724262  | 89.6203282 |
| H | -2.9060510 | 0.8449346  | 89.9948306 |
| C | -1.3054240 | 2.0932055  | 89.2777171 |
| C | 4.3931870  | 1.9900772  | 87.8753345 |
| C | 4.7537007  | 1.1265264  | 86.8485897 |
| H | 5.7833892  | 1.1505910  | 86.4609937 |
| C | 3.8173807  | 0.2321276  | 86.2527829 |
| C | 4.1850998  | -0.5852945 | 85.1422589 |
| C | 2.4632620  | 0.1740313  | 86.7515587 |
| C | 1.5260699  | -0.6548050 | 86.0646238 |
| C | 2.1065309  | 0.9792938  | 87.8949360 |
| C | 3.0610404  | 1.8771009  | 88.3832759 |
| O | 0.5206687  | 3.2948778  | 88.2968515 |
| O | 2.7152415  | 2.7012744  | 89.4471637 |
| P | 1.8077710  | 4.0206972  | 89.0495280 |
| O | 1.3517034  | 4.5321698  | 90.4638122 |
| O | 2.4112096  | 5.0075186  | 88.0964556 |
| C | -0.9672559 | -2.7529354 | 89.9565722 |
| C | 0.3792000  | -2.7309131 | 89.5060493 |
| H | -2.7426335 | -1.5767952 | 90.3472095 |
| H | -1.4148584 | -3.6957061 | 90.3062501 |
| H | 1.9992482  | -1.5479906 | 88.7158973 |
| H | 0.9761426  | -3.6556251 | 89.5212869 |
| C | 1.9123365  | -1.4232682 | 84.9751897 |
| C | 3.2562128  | -1.4030426 | 84.5170109 |
| H | 0.4812517  | -0.6732918 | 86.4040917 |
| H | 1.1681749  | -2.0496786 | 84.4599196 |
| H | 3.5534552  | -2.0233403 | 83.6577216 |
| H | 5.2244293  | -0.5403707 | 84.7801668 |
| C | -2.0152963 | 4.0416109  | 90.7301200 |
| C | -2.0114686 | 3.4037229  | 89.4551496 |
| C | -2.6094581 | 5.3094317  | 90.8414226 |
| C | -2.6191607 | 4.0362623  | 88.3418533 |
| C | -3.2141135 | 5.3028508  | 88.5122655 |
| C | -3.2118574 | 5.9649488  | 89.7487664 |
| H | -2.5963001 | 5.8219673  | 91.8156630 |
| C | -2.6466899 | 3.3796002  | 86.9631943 |
| H | -3.6734122 | 5.7891429  | 87.6388655 |
| C | -1.8484486 | 4.1911834  | 85.9279927 |
| H | -2.2818903 | 5.2023839  | 85.7784491 |
| H | -1.8456517 | 3.6773693  | 84.9440007 |

|    |            |            |            |
|----|------------|------------|------------|
| H  | -0.7997797 | 4.3217552  | 86.2563497 |
| C  | -4.0893734 | 3.1190894  | 86.4936431 |
| H  | -2.1524190 | 2.3903169  | 87.0554915 |
| H  | -4.6509182 | 4.0667104  | 86.3560531 |
| H  | -4.6469657 | 2.5036949  | 87.2285328 |
| H  | -4.0956154 | 2.5842842  | 85.5212404 |
| C  | -3.8483224 | 7.3361997  | 89.9655982 |
| C  | -4.0934667 | 8.1429735  | 88.6834978 |
| H  | -4.4963081 | 9.1448851  | 88.9348056 |
| H  | -4.8406706 | 7.6504965  | 88.0263372 |
| H  | -3.1701705 | 8.2997623  | 88.0892236 |
| C  | -5.1554858 | 7.1950373  | 90.7721550 |
| H  | -3.1292510 | 7.9113194  | 90.5934801 |
| H  | -5.5872289 | 8.1895580  | 91.0094135 |
| H  | -4.9908994 | 6.6558667  | 91.7262949 |
| H  | -5.9098624 | 6.6235079  | 90.1916479 |
| C  | -1.4382960 | 3.3487911  | 91.9655869 |
| C  | -0.7741410 | 4.2989035  | 92.9720026 |
| H  | -0.2681794 | 3.7178706  | 93.7692664 |
| H  | -1.5070393 | 4.9675313  | 93.4689902 |
| H  | -0.0132961 | 4.9349153  | 92.4844933 |
| C  | -2.5310927 | 2.5240269  | 92.6760047 |
| H  | -0.6541006 | 2.6472286  | 91.6118723 |
| H  | -2.1126379 | 1.9831340  | 93.5501521 |
| H  | -2.9902825 | 1.7756335  | 92.0022185 |
| H  | -3.3431972 | 3.1879711  | 93.0396782 |
| H  | 7.9894076  | 6.8895570  | 89.4409495 |
| H  | 7.5011056  | 1.3703309  | 91.4761677 |
| H  | 5.7836024  | 4.1430451  | 84.2061318 |
| C  | 7.8040494  | 6.1334915  | 90.2360454 |
| H  | 4.4755408  | 1.0967224  | 92.4898659 |
| H  | 7.6144575  | 7.6788812  | 91.7887726 |
| H  | 4.1564486  | 5.9452975  | 85.0555960 |
| C  | 6.9653458  | 5.0291063  | 89.6053712 |
| C  | 6.7536684  | 0.7986085  | 90.8870317 |
| C  | 7.0302789  | 6.8334710  | 91.3691176 |
| H  | 6.8162798  | 6.1276884  | 92.1990240 |
| C  | 6.6261158  | 3.8692455  | 90.3222407 |
| C  | 6.1745749  | 4.0062540  | 85.2362286 |
| H  | 9.7369788  | 5.1393519  | 89.8988072 |
| C  | 6.4672100  | 5.1596624  | 88.2998929 |
| C  | 9.1724986  | 5.6245367  | 90.7203720 |
| H  | 9.7873297  | 6.4590113  | 91.1168028 |
| H  | 6.7172818  | 6.0714022  | 87.7347819 |
| C  | 4.7687867  | 2.0095940  | 91.9310814 |
| H  | 6.5072741  | -0.1199001 | 91.4592519 |
| H  | 7.2392892  | 0.4933382  | 89.9380362 |
| C  | 5.8087486  | 2.8650870  | 89.7756018 |
| C  | 4.6653858  | 5.8705645  | 86.0400455 |
| C  | 5.6413431  | 4.1887015  | 87.7036830 |
| H  | 6.4756553  | 2.9461431  | 85.3466599 |
| H  | 7.0927891  | 4.6226199  | 85.3370414 |
| C  | 5.4879383  | 1.6347617  | 90.6225358 |
| C  | 5.3147071  | 3.0216032  | 88.4508625 |
| C  | 5.1234829  | 4.4210777  | 86.2839700 |
| H  | 3.8528022  | 2.5958360  | 91.7223591 |
| H  | 3.9568732  | 6.1909808  | 86.8267324 |
| H  | 5.4219935  | 2.6102904  | 92.5981651 |
| H  | 6.0584647  | 7.2273423  | 91.0089834 |
| H  | 5.5242240  | 6.5750803  | 86.0135291 |
| H  | 9.0617486  | 4.8797066  | 91.5359439 |
| H  | 4.7956686  | 0.9931169  | 90.0402299 |
| H  | 4.2305585  | 3.7762279  | 86.1530262 |
| H  | 7.0014900  | 3.7434382  | 91.3506069 |
| Zn | 1.3981211  | 6.4014150  | 90.7071800 |
| Br | -0.0625632 | 8.0130488  | 91.7432111 |
| C  | 3.2196303  | 10.1804621 | 84.3708982 |
| C  | 0.7380889  | 11.0993076 | 87.7143290 |
| C  | 3.4037506  | 9.4725757  | 85.5739122 |
| C  | 1.4490451  | 11.4902787 | 85.3867918 |
| C  | 1.6213253  | 10.7785891 | 86.5979974 |

|    |            |            |            |
|----|------------|------------|------------|
| C  | 2.2404567  | 11.1851773 | 84.2755460 |
| C  | 2.6038889  | 9.7624048  | 86.6821570 |
| O  | 0.6510943  | 10.4898030 | 88.7978214 |
| H  | 3.8464672  | 9.9437593  | 83.4971748 |
| H  | 0.6678955  | 12.2633802 | 85.3207937 |
| H  | 4.1663918  | 8.6834356  | 85.6471277 |
| H  | 2.0942425  | 11.7261438 | 83.3290914 |
| H  | 2.7533545  | 9.2066899  | 87.6198525 |
| Br | 3.1959255  | 7.9065379  | 89.9954709 |
| Zn | 0.7801444  | 8.5437959  | 89.2751357 |
| H  | 1.8324465  | 7.5191529  | 84.1707569 |
| H  | -0.1325233 | 6.1630540  | 88.5145278 |
| C  | 0.8527032  | 6.5951552  | 85.8938857 |
| C  | 0.8244379  | 7.2113695  | 84.5336778 |
| H  | 1.4225215  | 5.6972315  | 86.1704095 |
| C  | 0.0881797  | 7.3425655  | 86.7348211 |
| C  | -0.2305091 | 7.2086344  | 88.1664797 |
| C  | -0.4368893 | 8.4917185  | 85.9456077 |
| O  | 0.0112731  | 8.3870602  | 84.6515589 |
| O  | -1.1237857 | 9.4315846  | 86.3158312 |
| H  | 0.3804789  | 6.5448258  | 83.7593134 |
| H  | -1.2754352 | 7.5184766  | 88.3655207 |
| H  | 0.0964437  | 12.0055383 | 87.5845718 |

### 14β-ma

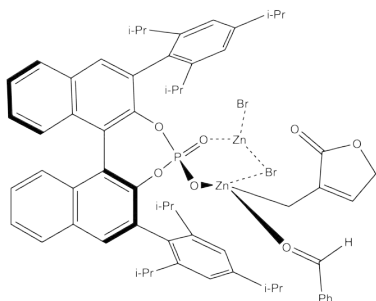

Energy (Hartree) = -11970.0242236

|   |            |            |            |
|---|------------|------------|------------|
| C | 0.0746123  | 1.2695233  | 90.1240731 |
| C | 1.0980421  | 0.4327764  | 90.5741108 |
| C | 0.8861420  | -0.2779696 | 91.8130827 |
| C | 1.9113948  | -1.0274439 | 92.4644697 |
| C | -0.4041916 | -0.1786199 | 92.4565625 |
| C | -0.6257123 | -0.8837048 | 93.6778641 |
| C | -1.4068909 | 0.6818133  | 91.9182226 |
| H | -2.3659155 | 0.7655509  | 92.4500609 |
| C | -1.1791698 | 1.4678252  | 90.7938867 |
| C | 4.3745151  | 1.5940180  | 88.9266796 |
| C | 4.9584341  | 0.3762701  | 88.5988159 |
| H | 5.9757486  | 0.3655762  | 88.1784602 |
| C | 4.2761232  | -0.8614483 | 88.7783340 |
| C | 4.8615552  | -2.0941544 | 88.3615692 |
| C | 2.9651938  | -0.8728313 | 89.3822504 |
| C | 2.2800353  | -2.1206083 | 89.4871204 |
| C | 2.3844464  | 0.3730371  | 89.8192670 |
| C | 3.0715869  | 1.5558849  | 89.5111188 |
| O | 0.2785230  | 1.9605161  | 88.9361399 |
| O | 2.5022780  | 2.7858248  | 89.8371830 |
| P | 1.2024812  | 3.3038011  | 88.9610550 |
| O | 0.5711727  | 4.4391644  | 89.7723011 |
| O | 1.5343547  | 3.5653621  | 87.4865170 |
| C | 0.3847501  | -1.6271482 | 94.2698848 |
| C | 1.6674332  | -1.6847595 | 93.6631630 |
| H | -1.6156843 | -0.8073428 | 94.1542174 |
| H | 0.1988992  | -2.1593297 | 95.2152119 |
| H | 2.9115884  | -1.0703294 | 92.0122390 |
| H | 2.4778251  | -2.2503021 | 94.1477720 |
| C | 2.8714216  | -3.2999370 | 89.0566589 |

|   |            |            |            |
|---|------------|------------|------------|
| C | 4.1783192  | -3.2923370 | 88.5011069 |
| H | 1.2637279  | -2.1385690 | 89.9047495 |
| H | 2.3188373  | -4.2480864 | 89.1408905 |
| H | 4.6394702  | -4.2349026 | 88.1692918 |
| H | 5.8669031  | -2.0720967 | 87.9123577 |
| C | -2.1720829 | 3.7564917  | 91.1845712 |
| C | -2.0295852 | 2.6117707  | 90.3390843 |
| C | -2.6496130 | 4.9499303  | 90.6178184 |
| C | -2.4741409 | 2.6773171  | 88.9879838 |
| C | -2.9262100 | 3.9041882  | 88.4717704 |
| C | -2.9673421 | 5.0687187  | 89.2539758 |
| H | -2.7206702 | 5.8484603  | 91.2506297 |
| C | -2.5086258 | 1.4393121  | 88.0942639 |
| H | -3.2196166 | 3.9542180  | 87.4140183 |
| C | -1.9869239 | 1.6931030  | 86.6701225 |
| H | -2.6713957 | 2.3435153  | 86.0871861 |
| H | -1.9009279 | 0.7363564  | 86.1157873 |
| H | -0.9906315 | 2.1760503  | 86.6813793 |
| C | -3.9366054 | 0.8575611  | 88.0733076 |
| H | -1.8571298 | 0.6685830  | 88.5554455 |
| H | -4.6525860 | 1.5843865  | 87.6358882 |
| H | -4.2887626 | 0.6156524  | 89.0965243 |
| H | -3.9775210 | -0.0696497 | 87.4645091 |
| C | -3.2238969 | 6.4493040  | 88.6629062 |
| C | -1.8733514 | 7.1795770  | 88.4911198 |
| H | -2.0205640 | 8.2160245  | 88.1235555 |
| H | -1.2377603 | 6.6511285  | 87.7496389 |
| H | -1.3121415 | 7.2301238  | 89.4460497 |
| C | -4.0040456 | 6.4410055  | 87.3426998 |
| H | -3.8179998 | 7.0184888  | 89.4136714 |
| H | -4.2474860 | 7.4767236  | 87.0315152 |
| H | -4.9545207 | 5.8764631  | 87.4286574 |
| H | -3.4060312 | 5.9909133  | 86.5231583 |
| C | -1.7939447 | 3.7502782  | 92.6660840 |
| C | -1.1348443 | 5.0255084  | 93.1464995 |
| H | -0.6717663 | 4.9261334  | 94.1448166 |
| H | -1.8597040 | 5.8874860  | 93.2346383 |
| H | -0.3400923 | 5.3956455  | 92.4584995 |
| C | -3.0225924 | 3.4232803  | 93.5385373 |
| H | -1.0543763 | 2.9364460  | 92.8192466 |
| H | -2.7421674 | 3.3600400  | 94.6105092 |
| H | -3.4991925 | 2.4659987  | 93.2464573 |
| H | -3.7928578 | 4.2154344  | 93.4335328 |
| H | 7.0064403  | 7.0538458  | 87.2743038 |
| H | 7.7917634  | 2.2676453  | 91.2740226 |
| H | 4.8289989  | 1.6339836  | 84.5640387 |
| C | 7.1064416  | 6.7485755  | 88.3392291 |
| H | 5.5678390  | 3.3008590  | 93.3897787 |
| H | 6.8638987  | 8.8173413  | 89.0373323 |
| H | 3.0085927  | 3.6264995  | 84.7169215 |
| C | 6.4235690  | 5.3937537  | 88.4763784 |
| C | 6.7965558  | 1.7861236  | 91.3726371 |
| C | 6.4031601  | 7.8199708  | 89.1938291 |
| H | 6.4788547  | 7.5826716  | 90.2763777 |
| C | 6.3537115  | 4.7433125  | 89.7206868 |
| C | 5.3568100  | 2.0459149  | 85.4490207 |
| H | 9.1192189  | 5.9188974  | 88.0241726 |
| C | 5.8111989  | 4.7747659  | 87.3777293 |
| C | 8.6088749  | 6.6679723  | 88.6623905 |
| H | 9.1020460  | 7.6494749  | 88.5047696 |
| H | 5.8449258  | 5.2879410  | 86.4041199 |
| C | 5.7512406  | 3.8280208  | 92.4324276 |
| H | 6.7592827  | 1.2743887  | 92.3567776 |
| H | 6.7152965  | 1.0132818  | 90.5836089 |
| C | 5.6974771  | 3.5131871  | 89.8876399 |
| C | 3.8176347  | 4.0396891  | 85.3504784 |
| C | 5.1266627  | 3.5482534  | 87.4892473 |
| H | 5.7232069  | 1.1921577  | 86.0508418 |
| H | 6.2423835  | 2.6098673  | 85.0884736 |
| C | 5.6759508  | 2.8391355  | 91.2600724 |
| C | 5.0853230  | 2.9041543  | 88.7541305 |

|    |            |           |            |
|----|------------|-----------|------------|
| C  | 4.4237575  | 2.9600043 | 86.2658404 |
| H  | 4.9972519  | 4.6342269 | 92.3348789 |
| H  | 3.4091620  | 4.8851887 | 85.9492120 |
| H  | 6.7528119  | 4.2999446 | 92.5117781 |
| H  | 5.3259765  | 7.8876375 | 88.9418248 |
| H  | 4.5703027  | 4.4973639 | 84.6757363 |
| H  | 8.7772949  | 6.3764455 | 89.7203524 |
| H  | 4.7067453  | 2.3026744 | 91.3505941 |
| H  | 3.5822312  | 2.3436870 | 86.6422121 |
| H  | 6.8180595  | 5.2207082 | 90.5958330 |
| Zn | 1.3644154  | 5.3740177 | 86.7385621 |
| Br | -0.0331352 | 5.7966237 | 84.9796600 |
| C  | 3.1596427  | 2.6040227 | 96.3076673 |
| C  | 2.0175941  | 4.1181933 | 92.4941656 |
| C  | 3.5548360  | 3.9059526 | 95.9408003 |
| C  | 2.0183880  | 2.3334892 | 94.1876214 |
| C  | 2.4308596  | 3.6321560 | 93.8058229 |
| C  | 2.3925404  | 1.8152422 | 95.4324030 |
| C  | 3.1999413  | 4.4247461 | 94.6926511 |
| O  | 2.4277895  | 5.1648304 | 91.9638713 |
| H  | 3.4484971  | 2.2041993 | 97.2922941 |
| H  | 1.4142810  | 1.7284014 | 93.4939701 |
| H  | 4.1413667  | 4.5197388 | 96.6407824 |
| H  | 2.0806145  | 0.7992862 | 95.7169326 |
| H  | 3.4932724  | 5.4426754 | 94.3996883 |
| Br | 2.5909221  | 6.8023726 | 88.2514768 |
| Zn | 1.2760784  | 6.1659384 | 90.4330656 |
| H  | 5.1074723  | 7.9753535 | 92.5983962 |
| C  | 3.2706250  | 8.7766334 | 91.7354662 |
| C  | 4.2233451  | 8.5965158 | 92.8765798 |
| C  | 2.0741329  | 8.2083551 | 92.0487637 |
| C  | 0.8573057  | 7.9409936 | 91.2638948 |
| C  | 2.2001385  | 7.6713158 | 93.4399346 |
| O  | 3.4838796  | 7.9106974 | 93.8930615 |
| O  | 1.3775191  | 7.0945684 | 94.1217431 |
| H  | 4.6105239  | 9.5522232 | 93.2988345 |
| H  | 1.2743505  | 3.4820495 | 91.9555320 |
| H  | -0.0356521 | 7.8690511 | 91.9147199 |
| H  | 0.6901760  | 8.6677775 | 90.4465930 |
| H  | 3.5503975  | 9.2531080 | 90.7854668 |

|   |            |            |            |
|---|------------|------------|------------|
| C | 1.4162428  | -2.5995618 | 88.5503806 |
| C | 2.0359755  | -0.1771273 | 88.8869753 |
| C | 2.9772040  | 0.8149027  | 88.6141708 |
| O | 0.4199219  | 1.9560731  | 87.9027749 |
| O | 2.6986888  | 2.1149822  | 89.0208341 |
| P | 1.6371681  | 3.0267048  | 88.1854510 |
| O | 1.1956278  | 4.0875902  | 89.2208499 |
| O | 2.1612815  | 3.5265464  | 86.8467104 |
| C | -0.7342958 | -1.7323773 | 93.0703809 |
| C | 0.5797666  | -2.0060966 | 92.6065319 |
| H | -2.5400450 | -0.5800474 | 92.7554953 |
| H | -1.1134732 | -2.2333932 | 93.9740115 |
| H | 2.0905795  | -1.6029759 | 91.1216189 |
| H | 1.2200649  | -2.7086372 | 93.1614217 |
| C | 1.7701287  | -3.8865691 | 88.1684979 |
| C | 3.0773432  | -4.1630796 | 87.6892010 |
| H | 0.3991084  | -2.3983097 | 88.9138868 |
| H | 1.0284174  | -4.6971656 | 88.2341159 |
| H | 3.3505279  | -5.1886808 | 87.3978217 |
| H | 5.0062260  | -3.3308889 | 87.1674160 |
| C | -2.3911501 | 3.8573563  | 89.2751289 |
| C | -2.2233985 | 2.5417786  | 88.7581385 |
| C | -3.2662533 | 4.7360494  | 88.6140647 |
| C | -2.9042792 | 2.1535983  | 87.5740819 |
| C | -3.7653251 | 3.0758754  | 86.9476112 |
| C | -3.9707039 | 4.3686463  | 87.4530985 |
| H | -3.3854654 | 5.7622832  | 88.9945906 |
| C | -2.7074511 | 0.7749909  | 86.9446910 |
| H | -4.2822961 | 2.7671826  | 86.0268817 |
| C | -1.9100735 | 0.8733253  | 85.6296227 |
| H | -2.4599502 | 1.4689326  | 84.8704690 |
| H | -1.7321975 | -0.1345158 | 85.2005832 |
| H | -0.9258028 | 1.3532254  | 85.7962421 |
| C | -4.0387891 | 0.0300568  | 86.7459177 |
| H | -2.1025137 | 0.1674191  | 87.6485038 |
| H | -4.6954685 | 0.5455284  | 86.0143996 |
| H | -4.5995762 | -0.0541494 | 87.6987819 |
| H | -3.8585662 | -0.9947494 | 86.3609142 |
| C | -4.9317863 | 5.3673876  | 86.8154733 |
| C | -5.2020198 | 5.1190813  | 85.3261714 |
| H | -5.8088703 | 5.9446036  | 84.9010635 |
| H | -5.7735473 | 4.1816853  | 85.1619970 |
| H | -4.2580941 | 5.0503189  | 84.7485234 |
| C | -6.2513101 | 5.4191446  | 87.6119179 |
| H | -4.4514479 | 6.3678787  | 86.9064527 |
| H | -6.9352113 | 6.1921198  | 87.2036107 |
| H | -6.0705111 | 5.6495867  | 88.6808585 |
| H | -6.7722274 | 4.4399057  | 87.5645799 |
| C | -1.6382926 | 4.3324996  | 90.5164956 |
| C | -1.1112899 | 5.7729393  | 90.3774395 |
| H | -0.3427975 | 5.9874400  | 91.1491054 |
| H | -1.9059103 | 6.5367396  | 90.5040447 |
| H | -0.7189109 | 5.9611878  | 89.3508816 |
| C | -2.4996342 | 4.2034186  | 91.7865185 |
| H | -0.7556716 | 3.6734170  | 90.6349065 |
| H | -1.9391025 | 4.5447435  | 92.6815130 |
| H | -2.8092856 | 3.1544028  | 91.9609455 |
| H | -3.4208350 | 4.8174408  | 91.7035598 |
| H | 6.0081808  | 5.8168747  | 85.0671294 |
| H | 7.6734784  | 3.0528465  | 90.1132967 |
| H | 4.8898677  | 0.4841713  | 82.9972983 |
| C | 5.9698936  | 5.8312952  | 86.1782756 |
| H | 5.0038084  | 3.1823672  | 91.9047647 |
| H | 4.8419833  | 7.7238824  | 86.1941406 |
| H | 2.6552392  | 0.3122126  | 84.1794950 |
| C | 5.7499880  | 4.3945101  | 86.6320295 |
| C | 7.0462889  | 2.1527672  | 90.2836620 |
| C | 4.7512703  | 6.6863642  | 86.5794193 |
| H | 4.6461656  | 6.7438082  | 87.6843351 |
| C | 5.8319702  | 4.0369466  | 87.9879103 |
| C | 5.1389230  | 1.3308842  | 83.6688797 |

### 14δ-ma

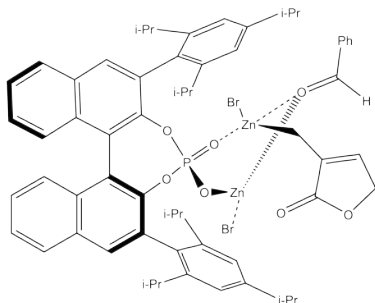

Energy (Hartree) = -11970.01533415

|   |            |            |            |
|---|------------|------------|------------|
| C | -0.0500115 | 1.2189425  | 88.9949708 |
| C | 0.7424378  | 0.1935369  | 89.5318606 |
| C | 0.2685826  | -0.4653589 | 90.7257074 |
| C | 1.0683002  | -1.3899988 | 91.4631358 |
| C | -1.0487682 | -0.1537546 | 91.2256402 |
| C | -1.5277656 | -0.8192992 | 92.3934939 |
| C | -1.8417443 | 0.8195682  | 90.5541535 |
| H | -2.8643449 | 1.0139222  | 90.9124792 |
| C | -1.3611868 | 1.5375072  | 89.4654650 |
| C | 4.2361259  | 0.5956445  | 87.9688399 |
| C | 4.5776451  | -0.7243734 | 87.7041739 |
| H | 5.5579968  | -0.9508561 | 87.2575920 |
| C | 3.6630597  | -1.7957780 | 87.9308328 |
| C | 3.9991322  | -3.1342933 | 87.5676521 |
| C | 2.3507481  | -1.5244389 | 88.4729003 |



|    |            |            |            |   |            |            |            |
|----|------------|------------|------------|---|------------|------------|------------|
| H  | 8.1574701  | 5.8242362  | 86.3989053 | C | 1.0213266  | 0.6674225  | 89.5796778 |
| C  | 5.3639993  | 3.4070539  | 85.7114257 | C | 0.6803967  | -0.2859589 | 90.6096087 |
| C  | 7.2835378  | 6.4409350  | 86.6908485 | C | 1.5151755  | -1.3973244 | 90.9342076 |
| H  | 7.4294441  | 7.4615645  | 86.2807731 | C | -0.5301406 | -0.0946918 | 91.3720237 |
| H  | 5.3054183  | 3.6825662  | 84.6489401 | C | -0.8722122 | -1.0387082 | 92.3856437 |
| C  | 4.9724660  | 3.5123573  | 90.8461642 | C | -1.3666945 | 1.0229638  | 91.0895365 |
| H  | 7.1501279  | 1.8628954  | 91.3501540 | H | -2.3306619 | 1.1160626  | 91.6132968 |
| H  | 7.4608382  | 1.3344930  | 89.6608200 | C | -1.0098815 | 1.9895170  | 90.1571859 |
| C  | 5.4478280  | 2.7646829  | 88.4424287 | C | 4.4366375  | 1.1698294  | 87.8958368 |
| C  | 2.9627879  | 1.0819104  | 84.9173398 | C | 4.5791039  | -0.0331192 | 87.2167725 |
| C  | 4.9783070  | 2.1136055  | 86.1064767 | H | 5.5296390  | -0.2529553 | 86.7081966 |
| H  | 6.2432864  | 1.4065642  | 83.7326439 | C | 3.5212423  | -0.9851166 | 87.1427551 |
| H  | 4.7577949  | 2.2522019  | 83.1822561 | C | 3.6459067  | -2.1676310 | 86.3550012 |
| C  | 5.5729067  | 2.4335277  | 89.9285004 | C | 2.2961840  | -0.7524143 | 87.8686666 |
| C  | 4.9755488  | 1.8086602  | 87.5009829 | C | 1.2342068  | -1.6937473 | 87.7305758 |
| C  | 4.4990719  | 1.1108982  | 85.0489626 | C | 2.1793671  | 0.4403903  | 88.6705597 |
| H  | 3.9159751  | 3.7190906  | 90.5865624 | C | 3.2005732  | 1.3828145  | 88.5738001 |
| H  | 2.4624757  | 0.8485144  | 85.8768540 | O | 0.5885964  | 2.8180781  | 88.5690750 |
| H  | 5.5312067  | 4.4692415  | 90.7880099 | O | 3.0643145  | 2.5994147  | 89.2529336 |
| H  | 3.8197920  | 6.2487644  | 86.1703261 | P | 1.9633777  | 3.6854943  | 88.7608054 |
| H  | 2.5882334  | 2.0652774  | 84.5694979 | O | 1.9504195  | 4.7869235  | 89.8429664 |
| H  | 7.2886126  | 6.5304185  | 87.7972260 | O | 2.1881280  | 4.3580650  | 87.3713160 |
| H  | 5.0123562  | 1.4933037  | 90.1126313 | C | -0.0470878 | -2.1175858 | 92.6635536 |
| H  | 4.8127954  | 0.1027412  | 85.3884794 | C | 1.1615440  | -2.2882427 | 91.9378148 |
| H  | 6.1722386  | 4.7824970  | 88.7232895 | H | -1.8042724 | -0.8855938 | 92.9519200 |
| Zn | 1.5793054  | 5.9413065  | 89.2508014 | H | -0.3200785 | -2.8349538 | 93.4523637 |
| Br | 2.5255563  | 7.4467010  | 90.6927456 | H | 2.4571532  | -1.5359236 | 90.3859075 |
| C  | 0.5904135  | 10.2615407 | 83.7841513 | H | 1.8276193  | -3.1315392 | 92.1756423 |
| C  | 1.0906913  | 7.9868523  | 87.3427731 | C | 1.3818191  | -2.8248309 | 86.9403220 |
| C  | 1.1606134  | 8.9762847  | 83.7045792 | C | 2.6006615  | -3.0730896 | 86.2557589 |
| C  | 0.3977345  | 10.0530941 | 86.1938411 | O | 0.2813113  | -1.5035535 | 88.2439976 |
| C  | 0.9667888  | 8.7587059  | 86.1186806 | H | 0.5430847  | -3.5299287 | 86.8365803 |
| C  | 0.2088766  | 10.7999949 | 85.0273965 | H | 2.7073728  | -3.9754725 | 85.6347551 |
| C  | 1.3477570  | 8.2231794  | 84.8657639 | H | 4.5875583  | -2.3376738 | 85.8099262 |
| O  | 1.4721003  | 6.7919384  | 87.3872921 | C | -1.8716518 | 4.3774032  | 90.3487190 |
| H  | 0.4425896  | 10.8523647 | 82.8665515 | C | -1.9426106 | 3.0909340  | 89.7519100 |
| H  | 0.0853813  | 10.4521012 | 87.1713079 | C | -2.7594887 | 5.3741086  | 89.9016314 |
| H  | 1.4602473  | 8.5508725  | 82.7349984 | C | -2.8968313 | 2.8189526  | 88.7312695 |
| H  | -0.2414071 | 11.8022138 | 85.0805470 | C | -3.7639108 | 3.8507049  | 88.3282186 |
| H  | 1.7907323  | 7.2179899  | 84.8001549 | C | -3.7118995 | 5.1348744  | 88.8965274 |
| Br | 2.5361308  | 4.9799131  | 83.5701187 | H | -2.7134156 | 6.3772069  | 90.3530520 |
| Zn | 1.1684692  | 4.5862175  | 85.4425074 | C | -2.9605613 | 1.4592334  | 88.0347565 |
| H  | -1.8562397 | 8.4097819  | 83.4903013 | H | -4.4993217 | 3.6430661  | 87.5355834 |
| H  | -1.2215020 | 3.8094464  | 85.3558728 | C | -2.2188798 | 1.4918948  | 86.6851846 |
| C  | -1.8459649 | 6.3016857  | 84.0820504 | H | -2.7156722 | 2.1877304  | 85.9766306 |
| C  | -2.4140513 | 7.6823531  | 84.1251145 | H | -2.2044612 | 0.4867712  | 86.2160089 |
| H  | -1.7798655 | 5.7017848  | 83.1638934 | H | -1.1659503 | 1.8185356  | 86.7889438 |
| C  | -1.4226933 | 5.9363155  | 85.3265777 | C | -4.3973886 | 0.9376824  | 87.8705756 |
| C  | -0.7910428 | 4.7116649  | 85.8347307 | H | -2.4273940 | 0.7317738  | 88.6800768 |
| C  | -1.7031587 | 7.1009598  | 86.2171958 | H | -4.9870042 | 1.5553924  | 87.1614095 |
| O  | -2.2955507 | 8.1011976  | 85.4904837 | H | -4.9399003 | 0.9242666  | 88.8376938 |
| O  | -1.4611794 | 7.2486599  | 87.4072202 | H | -4.3874381 | -0.0951877 | 87.4664718 |
| H  | -3.4878200 | 7.7334349  | 83.8320053 | C | -4.6825210 | 6.2303439  | 88.4706972 |
| H  | -0.9439769 | 4.6207991  | 86.9280418 | C | -4.6870699 | 6.4620594  | 86.9503896 |
| H  | 0.8564740  | 8.5200178  | 88.2953654 | H | -5.3484702 | 7.3124843  | 86.6838849 |

### 14e-ma

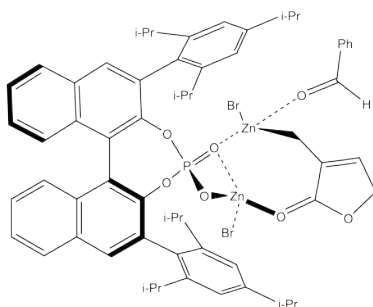

Energy (Hartree) = -11970.02080632

|   |           |           |            |
|---|-----------|-----------|------------|
| C | 0.2277968 | 1.8114149 | 89.4685816 |
|---|-----------|-----------|------------|

|    |            |            |            |
|----|------------|------------|------------|
| H  | -2.4307003 | 4.8265100  | 93.0493560 |
| H  | 8.5824169  | 5.8541118  | 87.4313972 |
| H  | 8.0525289  | 1.2785331  | 91.1146636 |
| H  | 5.1596928  | 1.9878518  | 83.6473933 |
| C  | 8.4600093  | 5.3914242  | 88.4357116 |
| H  | 5.1702237  | 1.5573231  | 92.4656924 |
| H  | 8.5685657  | 7.3420385  | 89.4449886 |
| H  | 3.9263316  | 4.2066989  | 84.1764612 |
| C  | 7.4715291  | 4.2439881  | 88.2723338 |
| C  | 7.2154081  | 0.6222991  | 90.7970265 |
| C  | 7.8858648  | 6.4694169  | 89.3750495 |
| H  | 7.7472297  | 6.0667880  | 90.4006122 |
| C  | 7.1941918  | 3.3610125  | 89.3299023 |
| C  | 5.7642932  | 2.1026886  | 84.5705117 |
| H  | 10.2648692 | 4.1525429  | 88.2154916 |
| C  | 6.7590774  | 4.0765844  | 87.0741689 |
| C  | 9.8469149  | 4.9173171  | 88.9008517 |
| H  | 10.5591219 | 5.7670575  | 88.9460311 |
| H  | 6.9604574  | 4.7710500  | 86.2436219 |
| C  | 5.4292678  | 2.2383948  | 91.6285249 |
| H  | 6.9968185  | -0.0695621 | 91.6369073 |
| H  | 7.5714446  | 0.0190966  | 89.9374046 |
| C  | 6.2278090  | 2.3459023  | 89.2216761 |
| C  | 4.6653164  | 4.3356979  | 84.9917545 |
| C  | 5.7792138  | 3.0795680  | 86.9115976 |
| H  | 5.9776065  | 1.0886185  | 84.9613470 |
| H  | 6.7356110  | 2.5663948  | 84.2962115 |
| C  | 5.9662248  | 1.4411556  | 90.4250839 |
| C  | 5.5150950  | 2.2042752  | 87.9991677 |
| C  | 5.0124688  | 2.9685597  | 85.5982754 |
| H  | 4.5216513  | 2.8104004  | 91.3532689 |
| H  | 4.2275707  | 5.0044816  | 85.7583461 |
| H  | 6.1847212  | 2.9588697  | 92.0061038 |
| H  | 6.8972429  | 6.8260016  | 89.0214931 |
| H  | 5.5540897  | 4.8439166  | 84.5620320 |
| H  | 9.8044179  | 4.4704812  | 89.9162088 |
| H  | 5.1806825  | 0.7127471  | 90.1366023 |
| H  | 4.0482241  | 2.4624760  | 85.8138844 |
| H  | 7.7357492  | 3.4761910  | 90.2826447 |
| Zn | 2.2811174  | 6.2862044  | 88.5295207 |
| Br | 4.0017775  | 7.7444953  | 88.0904981 |
| C  | 1.9525699  | 10.1181087 | 82.5221064 |
| C  | 2.0077208  | 6.4998103  | 84.7784098 |
| C  | 1.5030074  | 8.9225990  | 81.9232004 |
| C  | 2.4609060  | 8.9244385  | 84.5760698 |
| C  | 2.0086273  | 7.7252614  | 83.9774859 |
| C  | 2.4292698  | 10.1198450 | 83.8441977 |
| C  | 1.5295206  | 7.7273252  | 82.6457661 |
| O  | 1.5903072  | 5.4032661  | 84.3811691 |
| H  | 1.9304258  | 11.0572548 | 81.9477313 |
| H  | 2.8303570  | 8.9038049  | 85.6153238 |
| H  | 1.1338271  | 8.9334471  | 80.8864004 |
| H  | 2.7793697  | 11.0558311 | 84.3046412 |
| H  | 1.1823843  | 6.7783185  | 82.2097148 |
| Br | 1.3720820  | 1.7714094  | 85.0003277 |
| Zn | 0.8256428  | 3.9187667  | 85.7475562 |
| H  | -0.3933433 | 9.0938432  | 84.7234458 |
| H  | -1.7070935 | 4.4137494  | 85.6646344 |
| C  | -1.3754706 | 7.1726431  | 85.1365652 |
| C  | -1.0443056 | 8.5851215  | 85.4710926 |
| H  | -1.9423416 | 6.8810885  | 84.2424035 |
| C  | -0.8892736 | 6.3292873  | 86.1070252 |
| C  | -0.9069719 | 4.8831602  | 86.2669299 |
| C  | -0.1970849 | 7.2213160  | 87.0646748 |
| O  | -0.3033981 | 8.5133011  | 86.7048364 |
| O  | 0.4304626  | 6.9110058  | 88.0915638 |
| H  | -1.9342428 | 9.2316902  | 85.6421333 |
| H  | -1.0361061 | 4.5999927  | 87.3311834 |
| H  | 2.4176575  | 6.6099873  | 85.8163629 |

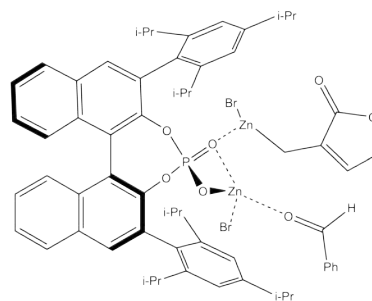

Energy (Hartree) = -11970.01628948

|   |            |            |            |
|---|------------|------------|------------|
| C | -0.2653831 | 1.1833635  | 88.8024838 |
| C | 0.5690729  | 0.2863030  | 89.4767922 |
| C | 0.1977653  | -0.0776972 | 90.8250295 |
| C | 1.0520172  | -0.8351495 | 91.6818351 |
| C | -1.0719812 | 0.3674814  | 91.3493082 |
| C | -1.4531694 | -0.0132132 | 92.6709331 |
| C | -1.9114877 | 1.1984546  | 90.5541050 |
| H | -2.8849957 | 1.5170873  | 90.9577526 |
| C | -1.5182961 | 1.6506021  | 89.2998459 |
| C | 4.0128564  | 0.1987138  | 87.7555061 |
| C | 4.2899103  | -1.1612608 | 87.7734207 |
| H | 5.2682731  | -1.5164311 | 87.4165750 |
| C | 3.3297127  | -2.1162502 | 88.2167344 |
| C | 3.5941037  | -3.5153323 | 88.1317227 |
| C | 2.0581234  | -1.6711114 | 88.7344694 |
| C | 1.0874900  | -2.6561506 | 89.0820129 |
| C | 1.8004626  | -0.2538477 | 88.8315141 |
| C | 2.7479868  | 0.6051714  | 88.2751080 |
| O | 0.0805420  | 1.6247584  | 87.5258389 |
| O | 2.5016626  | 1.9837548  | 88.2686034 |
| P | 1.3654043  | 2.5956795  | 87.2871685 |
| O | 1.2342512  | 4.0849450  | 87.6185124 |
| O | 1.6143805  | 2.4621828  | 85.7369342 |
| C | -0.6098436 | -0.7729298 | 93.4664454 |
| C | 0.6590410  | -1.1722005 | 92.9694170 |
| H | -2.4300129 | 0.3237374  | 93.0519673 |
| H | -0.9139457 | -1.0539421 | 94.4861754 |
| H | 2.0395864  | -1.1447196 | 91.3135820 |
| H | 1.3406543  | -1.7502723 | 93.6118174 |
| C | 1.3690555  | -4.0100173 | 88.9670034 |
| C | 2.6373423  | -4.4471442 | 88.5029892 |
| H | 0.0957369  | -2.3321293 | 89.4257738 |
| H | 0.5976210  | -4.7501422 | 89.2286992 |
| H | 2.8512298  | -5.5236104 | 88.4208387 |
| H | 4.5714233  | -3.8412344 | 87.7426224 |
| C | -2.5362540 | 3.9346764  | 88.9142925 |
| C | -2.3708837 | 2.5839389  | 88.4953629 |
| C | -3.4105766 | 4.7649359  | 88.1887250 |
| C | -3.0341428 | 2.1200615  | 87.3267359 |
| C | -3.9127990 | 2.9861151  | 86.6494559 |
| C | -4.1336051 | 4.3071038  | 87.0703215 |
| H | -3.5397723 | 5.8125622  | 88.5084810 |
| C | -2.8219279 | 0.7194960  | 86.7602908 |
| H | -4.4281485 | 2.6108356  | 85.7537507 |
| C | -2.3245864 | 0.7970997  | 85.3073591 |
| H | -3.0989775 | 1.1643893  | 84.6048278 |
| H | -1.9698088 | -0.1921302 | 84.9560321 |
| H | -1.4860185 | 1.5218453  | 85.2305549 |
| C | -4.0869806 | -0.1474286 | 86.8850297 |
| H | -2.0290063 | 0.2189626  | 87.3501077 |
| H | -4.9324132 | 0.2845410  | 86.3099491 |
| H | -4.4091019 | -0.2377005 | 87.9423207 |
| H | -3.9003048 | -1.1683946 | 86.4933976 |
| C | -5.1340651 | 5.2311274  | 86.3830945 |
| C | -5.4452988 | 4.8565814  | 84.9261030 |
| H | -6.0488363 | 5.6518951  | 84.4434644 |

14 $\eta$ -ma

|    |            |            |            |    |            |           |            |
|----|------------|------------|------------|----|------------|-----------|------------|
| H  | -6.0412001 | 3.9220865  | 84.8687678 | Zn | 0.7849470  | 1.0412031 | 84.4118483 |
| H  | -4.5353680 | 4.6929348  | 84.3116214 | H  | 0.3230974  | 6.3239300 | 83.2071408 |
| C  | -6.4313070 | 5.3189359  | 87.2128535 | H  | 1.0303605  | 1.5248980 | 81.9518845 |
| H  | -4.6769910 | 6.2474150  | 86.3882552 | C  | 0.8120019  | 4.3308216 | 82.4376708 |
| H  | -7.1458819 | 6.0380765  | 86.7612512 | C  | 0.0204705  | 5.6011569 | 82.4142493 |
| H  | -6.2267862 | 5.6422208  | 88.2531010 | H  | 1.8993690  | 4.3044371 | 82.2832449 |
| H  | -6.9275884 | 4.3273750  | 87.2618813 | C  | -0.0244741 | 3.2643387 | 82.6074453 |
| C  | -1.7854271 | 4.5168447  | 90.1116607 | C  | 0.2195220  | 1.8169926 | 82.6499570 |
| C  | -0.9224764 | 5.7268604  | 89.7117022 | C  | -1.4035652 | 3.8272117 | 82.7630137 |
| H  | -0.3594885 | 6.1070553  | 90.5891442 | O  | -1.3401918 | 5.2042792 | 82.6342941 |
| H  | -1.5375733 | 6.5659351  | 89.3236821 | O  | -2.4570959 | 3.2658188 | 82.9890186 |
| H  | -0.1893727 | 5.4380868  | 88.9340956 | H  | 0.0846212  | 6.1389334 | 81.4408307 |
| C  | -2.7465349 | 4.8591526  | 91.2642817 | H  | -0.7040015 | 1.2654105 | 82.3802575 |
| H  | -1.0896855 | 3.7367338  | 90.4815908 | H  | -2.5059360 | 4.9475401 | 85.0405322 |
| H  | -2.1868145 | 5.2337497  | 92.1461250 |    |            |           |            |
| H  | -3.3328854 | 3.9730902  | 91.5822617 |    |            |           |            |
| H  | -3.4704502 | 5.6463748  | 90.9661658 |    |            |           |            |
| H  | 7.5440030  | 4.4509289  | 84.7824698 |    |            |           |            |
| H  | 7.5853661  | 2.2606837  | 90.2723043 |    |            |           |            |
| H  | 4.7486335  | -1.1956823 | 83.6544325 |    |            |           |            |
| C  | 7.5156492  | 4.5126878  | 85.8928799 |    |            |           |            |
| H  | 4.6935065  | 2.9091188  | 91.4731569 |    |            |           |            |
| H  | 7.4508710  | 6.7087152  | 85.8538873 |    |            |           |            |
| H  | 3.2458168  | 0.7923317  | 83.0061486 |    |            |           |            |
| C  | 6.6612320  | 3.3479053  | 86.3757572 |    |            |           |            |
| C  | 6.8236353  | 1.4596509  | 90.3747414 |    |            |           |            |
| C  | 6.8665390  | 5.8590991  | 86.2649576 |    |            |           |            |
| H  | 6.8191436  | 5.9861873  | 87.3670749 |    |            |           |            |
| C  | 6.4850523  | 3.0906612  | 87.7459537 |    |            |           |            |
| C  | 5.3087760  | -0.5444318 | 84.3568353 |    |            |           |            |
| H  | 9.4370160  | 3.4627547  | 86.1121548 |    |            |           |            |
| C  | 5.9846998  | 2.5233973  | 85.4626255 |    |            |           |            |
| C  | 8.9649268  | 4.4236222  | 86.4005381 |    |            |           |            |
| H  | 9.5798672  | 5.2489790  | 85.9857767 |    |            |           |            |
| H  | 6.1111817  | 2.7208169  | 84.3865593 |    |            |           |            |
| C  | 4.8736858  | 3.1007855  | 90.3949456 |    |            |           |            |
| H  | 6.6866761  | 1.2657467  | 91.4588748 |    |            |           |            |
| H  | 7.2391289  | 0.5423475  | 89.9105925 |    |            |           |            |
| C  | 5.6489697  | 2.0616122  | 88.2124361 |    |            |           |            |
| C  | 3.9126128  | 1.4268382  | 83.6273562 |    |            |           |            |
| C  | 5.1374572  | 1.4777522  | 85.8742855 |    |            |           |            |
| H  | 5.6472760  | -1.1741876 | 85.2023335 |    |            |           |            |
| H  | 6.2144617  | -0.1676306 | 83.8362227 |    |            |           |            |
| C  | 5.4903147  | 1.8621111  | 89.7188541 |    |            |           |            |
| C  | 4.9682521  | 1.2461409  | 87.2671230 |    |            |           |            |
| C  | 4.4235502  | 0.6219105  | 84.8334965 |    |            |           |            |
| H  | 3.9083822  | 3.3708834  | 89.9237838 |    |            |           |            |
| H  | 3.3524076  | 2.3279241  | 83.9474007 |    |            |           |            |
| H  | 5.5471205  | 3.9802178  | 90.3210784 |    |            |           |            |
| H  | 5.8304600  | 5.9270222  | 85.8759624 |    |            |           |            |
| H  | 4.7358545  | 1.7637909  | 82.9634579 |    |            |           |            |
| H  | 9.0118669  | 4.5011910  | 87.5070204 |    |            |           |            |
| H  | 4.7881254  | 1.0176394  | 89.8758836 |    |            |           |            |
| H  | 3.5345172  | 0.1759430  | 85.3259717 |    |            |           |            |
| H  | 7.0029448  | 3.7258506  | 88.4826069 |    |            |           |            |
| Zn | 1.4383086  | 4.5828284  | 85.5657453 |    |            |           |            |
| Br | 2.9442869  | 6.1170177  | 84.7614712 |    |            |           |            |
| C  | -1.3526353 | 9.5352054  | 86.1554778 |    |            |           |            |
| C  | -1.5233462 | 5.3467896  | 85.3743656 |    |            |           |            |
| C  | -0.3301289 | 8.7044246  | 86.6506408 |    |            |           |            |
| C  | -2.4754453 | 7.6135435  | 85.1882486 |    |            |           |            |
| C  | -1.4440184 | 6.7745195  | 85.6736999 |    |            |           |            |
| C  | -2.4228096 | 8.9919382  | 85.4217888 |    |            |           |            |
| C  | -0.3688263 | 7.3285574  | 86.4075524 |    |            |           |            |
| O  | -0.5796261 | 4.5366933  | 85.4440955 |    |            |           |            |
| H  | -1.3153799 | 10.6188662 | 86.3461679 |    |            |           |            |
| H  | -3.2962148 | 7.1716329  | 84.6027690 |    |            |           |            |
| H  | 0.5008467  | 9.1334123  | 87.2296936 |    |            |           |            |
| H  | -3.2157462 | 9.6482717  | 85.0333696 |    |            |           |            |
| H  | 0.4168734  | 6.6765184  | 86.8154258 |    |            |           |            |
| Br | 1.0210914  | -1.0881822 | 85.3314376 |    |            |           |            |

### 14γ-2-ma

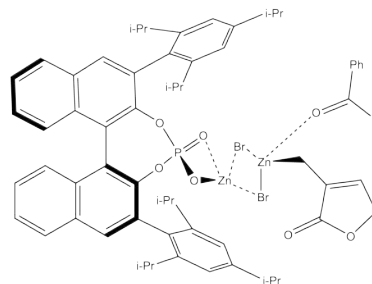

Energy (Hartree) = -11969.99280443

|   |            |            |            |
|---|------------|------------|------------|
| C | 0.0503006  | 0.9321873  | 89.4339222 |
| C | 0.8701970  | -0.0104462 | 90.0657882 |
| C | 0.3799380  | -0.6035051 | 91.2855115 |
| C | 1.1897946  | -1.4324618 | 92.1177502 |
| C | -0.9725575 | -0.3208641 | 91.7057465 |
| C | -1.4687737 | -0.9295421 | 92.8973326 |
| C | -1.7789089 | 0.5791918  | 90.9484778 |
| H | -2.8133278 | 0.7646233  | 91.2739881 |
| C | -1.2819134 | 1.2542890  | 89.8407254 |
| C | 4.2110171  | 0.4378066  | 88.2313961 |
| C | 4.6013261  | -0.8785488 | 88.0220801 |
| H | 5.5146312  | -1.0821394 | 87.4420790 |
| C | 3.7971940  | -1.9745433 | 88.4492893 |
| C | 4.1782427  | -3.3183383 | 88.1566678 |
| C | 2.5290374  | -1.7235602 | 89.0959538 |
| C | 1.6658752  | -2.8367893 | 89.3287224 |
| C | 2.1756964  | -0.3635897 | 89.4369405 |
| C | 3.0447683  | 0.6528395  | 89.0259650 |
| O | 0.5277611  | 1.6074454  | 88.3100116 |
| O | 2.7760701  | 1.9698704  | 89.3867920 |
| P | 1.5996446  | 2.8081658  | 88.6199486 |
| O | 1.0984559  | 3.8875439  | 89.6232974 |
| O | 1.9886268  | 3.4892236  | 87.2980112 |
| C | -0.6634380 | -1.7532034 | 93.6693323 |
| O | 0.6815733  | -1.9924615 | 93.2816246 |
| H | -2.5056099 | -0.7164810 | 93.2017898 |
| H | -1.0589431 | -2.2088772 | 94.5898709 |
| H | 2.2341808  | -1.6171101 | 91.8289909 |
| H | 1.3286698  | -2.6223307 | 93.9109815 |
| C | 2.0591640  | -4.1303548 | 89.0140761 |
| C | 3.3341177  | -4.3801526 | 88.4421630 |
| H | 0.6705945  | -2.6632581 | 89.7585241 |
| H | 1.3710093  | -4.9681183 | 89.2043115 |
| H | 5.1536432  | -3.4922204 | 87.6755425 |
| C | -2.2899318 | 3.5752145  | 89.6439727 |
| C | -2.0356387 | 2.2947565  | 89.0691946 |
| C | -2.9045620 | 4.5576070  | 88.8482775 |
| C | -2.4000584 | 2.0415956  | 87.7179745 |

|    |            |            |            |    |            |            |            |
|----|------------|------------|------------|----|------------|------------|------------|
| C  | -3.0075740 | 3.0649234  | 86.9681739 | C  | 0.6532334  | 11.2275893 | 80.7901380 |
| C  | -3.2624560 | 4.3338811  | 87.5069921 | C  | 0.8932699  | 8.6761375  | 84.2062263 |
| H  | -3.0873693 | 5.5551027  | 89.2788453 | C  | 1.8951501  | 11.0307516 | 81.4262724 |
| C  | -2.1696858 | 0.6887523  | 87.0460303 | C  | -0.4201700 | 9.7608200  | 82.3997289 |
| C  | -3.2627491 | 2.8630219  | 85.9181120 | C  | 0.8254052  | 9.5531757  | 83.0381197 |
| H  | -1.3418292 | 0.8120923  | 85.7543714 | C  | -0.5036993 | 10.5960887 | 81.2787322 |
| H  | -1.8769259 | 1.3875788  | 84.9716644 | C  | 1.9843555  | 10.2015186 | 82.5472818 |
| H  | -1.1203254 | -0.1934589 | 85.3398269 | O  | 1.9258601  | 8.5394513  | 84.9028228 |
| H  | -0.3851790 | 1.3338961  | 85.9420575 | H  | 0.5880028  | 11.8827124 | 79.9078957 |
| C  | -3.5104069 | -0.0281415 | 86.7971010 | H  | -1.3225048 | 9.2693547  | 82.7982086 |
| H  | -1.5939429 | 0.0509945  | 87.7477483 | H  | 2.7950767  | 11.5328208 | 81.0399290 |
| H  | -4.1491010 | 0.5483963  | 86.0955826 | H  | -1.4727185 | 10.7594202 | 80.7837271 |
| H  | -4.0807059 | -0.1574287 | 87.7395415 | H  | 2.9410714  | 10.0322036 | 83.0637627 |
| H  | -3.3443209 | -1.0319689 | 86.3534458 | Br | 3.2599803  | 6.8528675  | 88.2115609 |
| C  | -3.9184380 | 5.4510161  | 86.7030456 | Zn | 2.1751686  | 6.8164801  | 85.9689345 |
| C  | -3.6603086 | 5.3611624  | 85.1928732 | H  | -0.8410156 | 6.9752876  | 81.9221451 |
| H  | -4.0227066 | 6.2776032  | 84.6828074 | H  | 3.5168398  | 5.7361669  | 84.0492151 |
| H  | -4.2002292 | 4.5055676  | 84.7356481 | C  | 1.1801696  | 6.3497418  | 82.5096760 |
| H  | -2.5846079 | 5.2325559  | 84.9641252 | C  | -0.1913690 | 6.0704901  | 81.9775154 |
| C  | -5.4281640 | 5.5178812  | 87.0075563 | H  | 1.8981177  | 7.0147133  | 82.0109877 |
| H  | -3.4621942 | 6.4003621  | 87.0649243 | C  | 1.4131631  | 5.5604554  | 83.6064237 |
| H  | -5.9067661 | 6.3684008  | 86.4780849 | C  | 2.5484783  | 5.4603064  | 84.5068658 |
| H  | -5.6187601 | 5.6361388  | 88.0933150 | C  | 0.1480876  | 4.7781813  | 83.8500343 |
| H  | -5.9320816 | 4.5842932  | 86.6801337 | O  | -0.7743951 | 5.1331079  | 82.8843649 |
| C  | -1.9131290 | 3.9134339  | 91.0866580 | O  | -0.0997340 | 3.9655808  | 84.7115176 |
| C  | -1.3252128 | 5.3256742  | 91.2484424 | H  | -0.1765285 | 5.6245853  | 80.9556049 |
| H  | -0.9223690 | 5.4571811  | 92.2732513 | H  | 2.6031036  | 4.4965205  | 85.0483416 |
| H  | -2.0871805 | 6.1175612  | 91.0936241 | H  | -0.0559152 | 8.1695566  | 84.5127216 |
| H  | -0.4975192 | 5.4952365  | 90.5347777 | H  | 3.6391062  | -5.4108555 | 88.2053525 |
| C  | -3.1229528 | 3.7347376  | 92.0253547 | H  | 1.8120760  | 0.7985238  | 84.1314728 |
| H  | -1.1240108 | 3.1988444  | 91.3980470 | H  | 2.9420358  | 2.1214768  | 83.7337547 |
| H  | -2.8407037 | 3.9360861  | 93.0798545 | H  | 1.9444819  | 2.2163837  | 85.2207462 |
| H  | -3.5420141 | 2.7105975  | 91.9739541 |    |            |            |            |
| H  | -3.9376977 | 4.4371564  | 91.7501163 |    |            |            |            |
| H  | 6.1907211  | 4.8163080  | 84.2234577 |    |            |            |            |
| H  | 8.0571740  | 3.0051939  | 89.5682789 |    |            |            |            |
| H  | 3.7442073  | -0.8712988 | 83.9393363 |    |            |            |            |
| C  | 6.5842732  | 4.8993622  | 85.2613668 |    |            |            |            |
| H  | 5.6164713  | 3.5754794  | 91.5279860 |    |            |            |            |
| H  | 6.6346860  | 7.0904604  | 85.1600990 |    |            |            |            |
| C  | 5.9475886  | 3.7679514  | 86.0604569 |    |            |            |            |
| C  | 7.4202834  | 2.1707158  | 89.9298437 |    |            |            |            |
| C  | 6.1973712  | 6.2896425  | 85.7921360 |    |            |            |            |
| H  | 6.5602595  | 6.4465711  | 86.8289386 |    |            |            |            |
| C  | 6.1772225  | 3.6222015  | 87.4400942 |    |            |            |            |
| C  | 4.4177293  | -0.1585985 | 84.4590013 |    |            |            |            |
| H  | 8.3941485  | 3.7487064  | 84.7722060 |    |            |            |            |
| C  | 5.1243234  | 2.8224250  | 85.4296377 |    |            |            |            |
| C  | 8.1139324  | 4.7361675  | 85.1907354 |    |            |            |            |
| H  | 8.5710246  | 5.5241831  | 84.5564596 |    |            |            |            |
| H  | 4.9135047  | 2.9418344  | 84.3544910 |    |            |            |            |
| C  | 5.4447374  | 3.6965920  | 90.4384263 |    |            |            |            |
| H  | 7.6174589  | 2.0442080  | 91.0146507 |    |            |            |            |
| H  | 7.7509839  | 1.2486993  | 89.4100173 |    |            |            |            |
| C  | 5.6353693  | 2.5552012  | 88.1784100 |    |            |            |            |
| C  | 2.5208954  | 1.5288749  | 84.5730730 |    |            |            |            |
| C  | 4.5439736  | 1.7440313  | 86.1224973 |    |            |            |            |
| H  | 5.1596247  | -0.7470726 | 85.0355279 |    |            |            |            |
| H  | 4.9735766  | 0.4095375  | 83.6835381 |    |            |            |            |
| C  | 5.9284674  | 2.4521000  | 89.6726786 |    |            |            |            |
| C  | 4.8362362  | 1.5920183  | 87.5086056 |    |            |            |            |
| C  | 3.6144061  | 0.7916026  | 85.3664961 |    |            |            |            |
| H  | 4.3621289  | 3.8663157  | 90.2798926 |    |            |            |            |
| H  | 5.9841456  | 4.6114559  | 90.1158078 |    |            |            |            |
| H  | 5.0977976  | 6.4233893  | 85.8121322 |    |            |            |            |
| H  | 8.5685614  | 4.8121359  | 86.2006217 |    |            |            |            |
| H  | 5.3607713  | 1.5823937  | 90.0638703 |    |            |            |            |
| H  | 3.0908320  | 0.1669234  | 86.1182130 |    |            |            |            |
| H  | 6.8033119  | 4.3630061  | 87.9629501 |    |            |            |            |
| Zn | 1.3330886  | 5.2993593  | 88.1987638 |    |            |            |            |
| Br | -0.2389311 | 6.6602176  | 86.9919598 |    |            |            |            |

ed<sub>fav.</sub> = 14 $\gamma$ -int-ma; COSMO

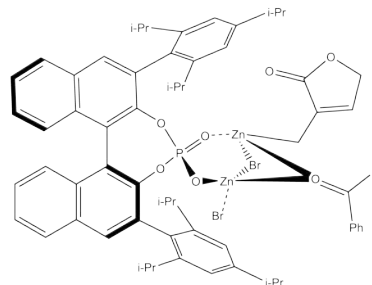

Energy (Hartree) = -11970.04344023

|   |           |            |            |
|---|-----------|------------|------------|
| C | 1.3057612 | 2.0344531  | 0.8483776  |
| C | 2.7059120 | 2.0750164  | 0.8712754  |
| C | 3.3307523 | 3.3743175  | 0.8852290  |
| C | 4.7348748 | 3.5497929  | 0.7017617  |
| C | 2.5071425 | 4.5477306  | 1.0596943  |
| C | 3.1275417 | 5.8330872  | 1.0852664  |
| C | 1.0974093 | 4.4029090  | 1.2129449  |
| H | 0.4895046 | 5.2966235  | 1.4224204  |
| C | 0.4717275 | 3.1671212  | 1.0889146  |
| C | 3.7718559 | -1.5629986 | 0.2301228  |
| C | 4.7488050 | -1.7393466 | 1.2014338  |
| H | 5.2421514 | -2.7183794 | 1.2977243  |
| C | 5.0809695 | -0.7092573 | 2.1276140  |
| C | 6.0306349 | -0.9414257 | 3.1678355  |
| C | 4.3895836 | 0.5580707  | 2.0683477  |
| C | 4.6237326 | 1.4964035  | 3.1192806  |
| C | 3.4703540 | 0.7993576  | 0.9778177  |
| C | 3.2096270 | -0.2569269 | 0.1005121  |
| O | 0.6490142 | 0.8208285  | 0.6829466  |
| O | 2.3699371 | -0.0324475 | -0.9873751 |
| P | 0.7498005 | 0.0470870  | -0.7578695 |
| O | 0.2273360 | 0.8995959  | -1.9295452 |

|   |            |            |            |    |            |            |            |
|---|------------|------------|------------|----|------------|------------|------------|
| O | 0.1108565  | -1.3162824 | -0.4854813 | H  | 6.3264363  | -3.1017351 | -2.1882044 |
| C | 4.4980086  | 5.9679166  | 0.9181394  | C  | 3.5752534  | -2.8513149 | -1.9462783 |
| C | 5.3041729  | 4.8158835  | 0.7134413  | C  | 0.4155038  | -3.7113057 | 1.7713603  |
| H | 2.4914984  | 6.7208178  | 1.2286868  | C  | 2.3083565  | -3.6011520 | 0.0298491  |
| H | 4.9615296  | 6.9661318  | 0.9321044  | H  | 3.8484701  | -4.2442619 | 2.2445504  |
| H | 5.3647901  | 2.6640243  | 0.5358676  | H  | 2.5710047  | -5.4868680 | 2.0936142  |
| H | 6.3880091  | 4.9279375  | 0.5573799  | C  | 4.5431496  | -1.8935030 | -2.6363172 |
| C | 5.5384055  | 1.2313375  | 4.1298377  | C  | 3.2264639  | -2.6964540 | -0.5830756 |
| C | 6.2659535  | 0.0119722  | 4.1467224  | C  | 1.9113543  | -3.4791507 | 1.5031647  |
| H | 4.0641572  | 2.4409726  | 3.1332525  | H  | 2.9831895  | -0.6165016 | -3.5006055 |
| H | 5.6948995  | 1.9728475  | 4.9282149  | H  | -0.2226562 | -3.0254004 | 1.1850050  |
| H | 6.9961123  | -0.1824258 | 4.9470741  | H  | 3.5871281  | -1.8743347 | -4.6222035 |
| H | 6.5588856  | -1.9076771 | 3.1883579  | H  | -0.4396326 | -5.8838000 | -1.9292185 |
| C | -1.9253931 | 3.5656885  | 0.3596543  | H  | 0.1084373  | -4.7557992 | 1.5520518  |
| C | -1.0028708 | 2.9845564  | 1.2738201  | H  | 1.9007490  | -5.3808786 | -4.9284720 |
| C | -3.3049563 | 3.4504138  | 0.6212023  | H  | 4.8305083  | -1.1202616 | -1.8938569 |
| C | -1.4853190 | 2.2407579  | 2.3907934  | H  | 2.1356660  | -2.4396645 | 1.8207809  |
| C | -2.8734876 | 2.1460428  | 2.5946130  | H  | 3.3158671  | -4.0386381 | -3.7305894 |
| C | -3.8038826 | 2.7597491  | 1.7396400  | Zn | -0.6097954 | 0.2096019  | -3.5805016 |
| H | -4.0214811 | 3.9111008  | -0.0788991 | Br | -1.1558014 | 1.5789964  | -5.3637999 |
| C | -0.5663066 | 1.5555948  | 3.4024037  | C  | -6.3656600 | 2.1899844  | -3.1148521 |
| H | -3.2360756 | 1.5791497  | 3.4653982  | C  | -3.1178051 | -0.0786846 | -1.5798790 |
| C | -0.7981745 | 0.0326941  | 3.4353980  | C  | -5.3955529 | 1.6877672  | -4.0065648 |
| H | -1.8191629 | -0.2215206 | 3.7876775  | C  | -5.1982486 | 1.1878391  | -1.2399308 |
| H | -0.0742479 | -0.4533248 | 4.1223104  | C  | -4.2190893 | 0.6827398  | -2.1312307 |
| H | -0.6770090 | -0.4163296 | 2.4317219  | C  | -6.2712769 | 1.9367616  | -1.7340194 |
| C | -0.7071113 | 2.1851759  | 4.8012562  | C  | -4.3276622 | 0.9296292  | -3.5236229 |
| H | 0.4828873  | 1.7225041  | 3.0875819  | O  | -2.1863917 | -0.5763791 | -2.2609179 |
| H | -1.7279804 | 2.0409636  | 5.2128015  | H  | -7.2059189 | 2.7859465  | -3.5033439 |
| H | -0.5050817 | 3.2755056  | 4.7752150  | H  | -5.0956448 | 0.9903694  | -0.1632673 |
| H | 0.0076268  | 1.7197525  | 5.5112523  | H  | -5.4758450 | 1.8957966  | -5.0838195 |
| C | -5.2988745 | 2.7370380  | 2.0384708  | H  | -7.0341098 | 2.3304673  | -1.0458211 |
| C | -5.7983222 | 1.3944718  | 2.5981300  | H  | -3.5565359 | 0.5467657  | -4.2082131 |
| H | -6.9056954 | 1.3888436  | 2.6617296  | Br | 0.0893930  | -2.1248424 | -3.8968170 |
| H | -5.4154839 | 1.2159245  | 3.6242861  | Zn | -1.0107601 | -2.4450502 | -1.6405174 |
| H | -5.4822167 | 0.5281884  | 1.9806289  | H  | -6.1562179 | -1.2805767 | -0.8131176 |
| C | -5.6686074 | 3.8983640  | 2.9832704  | H  | -2.5692439 | -4.4837504 | -1.9599415 |
| H | -5.8218292 | 2.9263127  | 1.0742635  | C  | -4.8463757 | -2.9838867 | -1.2543356 |
| H | -6.7627623 | 3.9298697  | 3.1677618  | C  | -5.7535545 | -2.2120882 | -0.3521454 |
| H | -5.3597700 | 4.8754560  | 2.5603406  | H  | -5.1657834 | -3.3905109 | -2.2241004 |
| H | -5.1596370 | 3.7799678  | 3.9627924  | C  | -3.6243343 | -3.1326147 | -0.6664432 |
| C | -1.4710105 | 4.2786204  | -0.9131879 | C  | -2.3914267 | -3.7954100 | -1.1124570 |
| C | -2.0570329 | 3.6154306  | -2.1705763 | C  | -3.6828283 | -2.3877723 | 0.6323710  |
| H | -1.6577534 | 4.0863745  | -3.0913190 | O  | -4.9502214 | -1.8532709 | 0.7805082  |
| H | -3.1640488 | 3.6889594  | -2.2077309 | O  | -2.8073726 | -2.1998069 | 1.4531453  |
| H | -1.7846165 | 2.5438504  | -2.2123397 | H  | -6.6273887 | -2.8075713 | -0.0018197 |
| C | -1.7909774 | 5.7834523  | -0.8712223 | H  | -1.9111176 | -4.3406162 | -0.2735755 |
| H | -0.3697369 | 4.1705825  | -0.9813459 | H  | -3.0880275 | -0.2008408 | -0.4708163 |
| H | -1.4150125 | 6.2903378  | -1.7838675 |    |            |            |            |
| H | -1.3282976 | 6.2745414  | 0.0091194  |    |            |            |            |
| H | -2.8855407 | 5.9613857  | -0.8145687 |    |            |            |            |
| H | 1.8074719  | -6.9407415 | -2.2612998 |    |            |            |            |
| H | 5.6332995  | -3.4033541 | -3.8122509 |    |            |            |            |
| H | 2.5175375  | -4.3069704 | 3.4450364  |    |            |            |            |
| C | 1.5568028  | -6.0354044 | -2.8616145 |    |            |            |            |
| H | 4.5966105  | -0.4367705 | -4.2704779 |    |            |            |            |
| H | -0.3985358 | -6.8578914 | -3.4297207 |    |            |            |            |
| H | 0.1914811  | -3.5298702 | 2.8424568  |    |            |            |            |
| C | 2.1422314  | -4.8477992 | -2.0962967 |    |            |            |            |
| C | 5.8365337  | -2.6157928 | -3.0565316 |    |            |            |            |
| C | 0.0191349  | -5.9570653 | -2.9346996 |    |            |            |            |
| H | -0.3005436 | -5.0675407 | -3.5166279 |    |            |            |            |
| C | 3.0308336  | -3.9280235 | -2.6747945 |    |            |            |            |
| C | 2.7634081  | -4.4285828 | 2.3696501  |    |            |            |            |
| H | 3.2535888  | -6.3336080 | -4.2356210 |    |            |            |            |
| C | 1.7916097  | -4.6544012 | -0.7438561 |    |            |            |            |
| C | 2.1498614  | -6.2326931 | -4.2612702 |    |            |            |            |
| H | 1.7373904  | -7.1495524 | -4.7284603 |    |            |            |            |
| H | 1.0985077  | -5.3670428 | -0.2688942 |    |            |            |            |
| C | 3.8888937  | -1.1653363 | -3.8235643 |    |            |            |            |
| H | 6.5582185  | -1.9011090 | -3.5037592 |    |            |            |            |

ed<sub>fav.</sub> = 14 $\gamma$ -int-ma

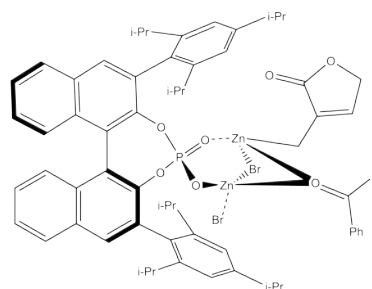

Energy (Hartree) = -11970.03195214

|   |           |           |           |
|---|-----------|-----------|-----------|
| C | 1.3070170 | 2.0339555 | 0.8453492 |
| C | 2.7070758 | 2.0748090 | 0.8703054 |
| C | 3.3314681 | 3.3741383 | 0.8870233 |
| C | 4.7355012 | 3.5499598 | 0.7053981 |
| C | 2.5080874 | 4.5471873 | 1.0630532 |
| C | 3.1290562 | 5.8316507 | 1.0916187 |
| C | 1.0985817 | 4.4015720 | 1.2149798 |
| H | 0.4891973 | 5.2939919 | 1.4256478 |

|   |            |            |            |    |            |            |            |
|---|------------|------------|------------|----|------------|------------|------------|
| C | 0.4730824  | 3.1663241  | 1.0878376  | H  | 0.1901707  | -3.5217953 | 2.8452118  |
| C | 3.7713320  | -1.5634896 | 0.2305006  | C  | 2.1409829  | -4.8487193 | -2.0928190 |
| C | 4.7473792  | -1.7397614 | 1.2023806  | C  | 5.8308508  | -2.6174903 | -3.0604701 |
| H | 5.2381611  | -2.7200866 | 1.2988100  | C  | 0.0190089  | -5.9591008 | -2.9324453 |
| C | 5.0805434  | -0.7099683 | 2.1280093  | H  | -0.2995387 | -5.0697723 | -3.5151991 |
| C | 6.0293895  | -0.9414782 | 3.1684039  | C  | 3.0275542  | -3.9283483 | -2.6725809 |
| C | 4.3901854  | 0.5576563  | 2.0675737  | C  | 2.7590126  | -4.4341857 | 2.3712262  |
| C | 4.6250135  | 1.4962547  | 3.1178314  | H  | 3.2543230  | -6.3358792 | -4.2291113 |
| C | 3.4715568  | 0.7992633  | 0.9765680  | C  | 1.7918871  | -4.6553264 | -0.7404170 |
| C | 3.2103206  | -0.2569634 | 0.0991278  | C  | 2.1506445  | -6.2362109 | -4.2560134 |
| O | 0.6499720  | 0.8216448  | 0.6775274  | H  | 1.7400277  | -7.1539167 | -4.7230919 |
| O | 2.3726249  | -0.0333729 | -0.9891468 | H  | 1.1005045  | -5.3686764 | -0.2639156 |
| P | 0.7523861  | 0.0469435  | -0.7633831 | C  | 3.8832362  | -1.1627088 | -3.8203762 |
| O | 0.2283798  | 0.8970152  | -1.9347147 | H  | 6.5530873  | -1.9037205 | -3.5081250 |
| O | 0.1140537  | -1.3167589 | -0.4889532 | H  | 6.3215328  | -3.1063947 | -2.1944821 |
| C | 4.4992042  | 5.9668055  | 0.9265686  | C  | 3.5724813  | -2.8517341 | -1.9450599 |
| C | 5.3049601  | 4.8154342  | 0.7206618  | C  | 0.4146770  | -3.7033583 | 1.7744149  |
| H | 2.4927563  | 6.7191012  | 1.2355184  | C  | 2.3083164  | -3.6017547 | 0.0326196  |
| H | 4.9626451  | 6.9649610  | 0.9429579  | H  | 3.8448806  | -4.2546804 | 2.2468322  |
| H | 5.3643002  | 2.6636624  | 0.5388944  | H  | 2.5631205  | -5.4912275 | 2.0933862  |
| H | 6.3889774  | 4.9273271  | 0.5661660  | C  | 4.5395683  | -1.8939999 | -2.6363561 |
| C | 5.5395152  | 1.2314389  | 4.1279986  | C  | 3.2252736  | -2.6971389 | -0.5815922 |
| C | 6.2657349  | 0.0120411  | 4.1461370  | C  | 1.9118163  | -3.4795047 | 1.5061092  |
| H | 4.0658989  | 2.4410055  | 3.1302284  | H  | 2.9817547  | -0.6098059 | -3.4933556 |
| H | 5.6966228  | 1.9737428  | 4.9254474  | H  | -0.2193193 | -3.0129423 | 1.1888427  |
| H | 6.9956667  | -0.1825317 | 4.9465800  | H  | 3.5751001  | -1.8692638 | -4.6186411 |
| H | 6.5564286  | -1.9083625 | 3.1898428  | H  | -0.4409488 | -5.8847971 | -1.9276105 |
| C | -1.9232667 | 3.5640126  | 0.3573323  | H  | 0.1012595  | -4.7460413 | 1.5550617  |
| C | -1.0013832 | 2.9828310  | 1.2717367  | H  | 1.9008528  | -5.3857705 | -4.9244912 |
| C | -3.3026439 | 3.4472564  | 0.6180949  | H  | 4.8297910  | -1.1224663 | -1.8932390 |
| C | -1.4835030 | 2.2368312  | 2.3871097  | H  | 2.1415486  | -2.4417792 | 1.8253601  |
| C | -2.8715088 | 2.1398238  | 2.5891326  | H  | 3.3112946  | -4.0387797 | -3.7286476 |
| C | -3.8014747 | 2.7549744  | 1.7353092  | Zn | -0.5870442 | 0.2248423  | -3.6015828 |
| H | -4.0188986 | 3.9085918  | -0.0820305 | Br | -1.1883863 | 1.5851445  | -5.3652333 |
| C | -0.5643348 | 1.5526924  | 3.3991510  | C  | -6.3839435 | 2.1785872  | -3.0979956 |
| H | -3.2336762 | 1.5692771  | 3.4575412  | C  | -3.1074209 | -0.0622976 | -1.5765628 |
| C | -0.7933466 | 0.0295383  | 3.4329765  | C  | -5.4042487 | 1.6996325  | -3.9908177 |
| H | -1.8140036 | -0.2287532 | 3.7826600  | C  | -5.2048863 | 1.1778711  | -1.2290113 |
| H | -0.0697039 | -0.4544693 | 4.1214549  | C  | -4.2186847 | 0.6935243  | -2.1228183 |
| H | -0.6697039 | -0.4201397 | 2.4300627  | C  | -6.2885510 | 1.9142054  | -1.7196035 |
| C | -0.7069946 | 2.1835052  | 4.7971713  | C  | -4.3272679 | 0.9508100  | -3.5125624 |
| H | 0.4847550  | 1.7217216  | 3.0851423  | O  | -2.1893365 | -0.5663519 | -2.2664992 |
| H | -1.7274340 | 2.0378026  | 5.2090560  | H  | -7.2316298 | 2.7665374  | -3.4829858 |
| H | -0.5079308 | 3.2742120  | 4.7704467  | H  | -5.1010325 | 0.9720612  | -0.1540047 |
| H | 0.0080882  | 1.7203522  | 5.5081536  | H  | -5.4804963 | 1.9194983  | -5.0660581 |
| C | -5.2962071 | 2.7350075  | 2.0360131  | H  | -7.0574056 | 2.2905827  | -1.0282433 |
| C | -5.7979278 | 1.3953961  | 2.6006473  | H  | -3.5450903 | 0.5914107  | -4.1979831 |
| H | -6.9053305 | 1.3915157  | 2.6660208  | Br | 0.0839276  | -2.1236290 | -3.9021075 |
| H | -5.4159843 | 1.2207274  | 3.6276681  | Zn | -1.0069736 | -2.4369559 | -1.6519858 |
| H | -5.4828032 | 0.5245739  | 1.9892464  | H  | -6.1678113 | -1.3085526 | -0.8672150 |
| C | -5.6627139 | 3.9006083  | 2.9766054  | H  | -2.5490464 | -4.4997186 | -1.9329050 |
| H | -5.8194509 | 2.9217726  | 1.0710717  | C  | -4.8461342 | -3.0151589 | -1.2589315 |
| H | -6.7563203 | 3.9358866  | 3.1639904  | C  | -5.7589352 | -2.2235289 | -0.3778128 |
| H | -5.3515077 | 4.8752619  | 2.5502626  | H  | -5.1617548 | -3.4539869 | -2.2158035 |
| H | -5.1516680 | 3.7854095  | 3.9552012  | C  | -3.6213068 | -3.1326853 | -0.6711260 |
| C | -1.4678873 | 4.2779501  | -0.9146071 | C  | -2.3809470 | -3.7895169 | -1.1017399 |
| C | -2.0499365 | 3.6142519  | -2.1732576 | C  | -3.6843372 | -2.3497412 | 0.6068009  |
| H | -1.6489355 | 4.0829005  | -3.0941859 | O  | -4.9603823 | -1.8249454 | 0.7413002  |
| H | -3.1569722 | 3.6867093  | -2.2138704 | O  | -2.8089850 | -2.1242920 | 1.4150833  |
| H | -1.7752943 | 2.5433672  | -2.2143940 | H  | -6.6292404 | -2.8145305 | -0.0093659 |
| C | -1.7899922 | 5.7821642  | -0.8725826 | H  | -1.8948022 | -4.3086073 | -0.2497779 |
| H | -0.3663964 | 4.1714360  | -0.9809117 | H  | -3.0647068 | -0.1740641 | -0.4664657 |
| H | -1.4136450 | 6.2903570  | -1.7842295 |    |            |            |            |
| H | -1.3302853 | 6.2740007  | 0.0088018  |    |            |            |            |
| H | -2.8846833 | 5.9594808  | -0.8173682 |    |            |            |            |
| H | 1.8073847  | -6.9419416 | -2.2556421 |    |            |            |            |
| H | 5.6255568  | -3.4035874 | -3.8170034 |    |            |            |            |
| H | 2.5136926  | -4.3136911 | 3.4467456  |    |            |            |            |
| C | 1.5564579  | -6.0373516 | -2.8571533 |    |            |            |            |
| H | 4.5913270  | -0.4363929 | -4.2701200 |    |            |            |            |
| H | -0.3990383 | -6.8599061 | -3.4272937 |    |            |            |            |

14 $\gamma$ -ma

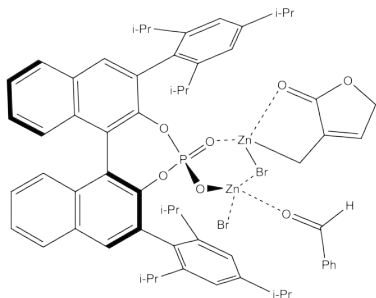

Energy (Hartree) = -11970.03459398

|   |            |            |            |
|---|------------|------------|------------|
| C | 0.1717641  | 1.6308451  | 88.7338051 |
| C | 0.9176083  | 0.6470608  | 89.3957444 |
| C | 0.4894074  | 0.2508772  | 90.7169353 |
| C | 1.2683723  | -0.5990588 | 91.5592789 |
| C | -0.7596078 | 0.7587489  | 91.2323552 |
| C | -1.2001952 | 0.3490423  | 92.5265278 |
| C | -1.5158829 | 1.6794061  | 90.4540586 |
| H | -2.4751355 | 2.0498908  | 90.8478681 |
| C | -1.0590408 | 2.1567246  | 89.2308085 |
| C | 4.4150685  | 0.4330516  | 87.8174858 |
| C | 4.6137181  | -0.9411002 | 87.7838308 |
| H | 5.5907294  | -1.3356953 | 87.4671215 |
| C | 3.5822125  | -1.8610541 | 88.1336075 |
| C | 3.7759640  | -3.2690126 | 88.0063384 |
| C | 2.3120970  | -1.3669743 | 88.6105663 |
| C | 1.2772208  | -2.3113467 | 88.8815957 |
| C | 2.1324338  | 0.0569273  | 88.7645412 |
| C | 3.1514831  | 0.8925039  | 88.3026192 |
| O | 0.5690289  | 2.0807955  | 87.4836997 |
| O | 2.9622589  | 2.2706234  | 88.3647243 |
| P | 1.9591087  | 2.9226059  | 87.2452121 |
| O | 1.8130872  | 4.4034067  | 87.6195795 |
| O | 2.3838536  | 2.5641268  | 85.8173766 |
| C | -0.4315443 | -0.5008020 | 93.3064298 |
| C | 0.8200784  | -0.9640177 | 92.8209542 |
| H | -2.1606468 | 0.7375547  | 92.9002551 |
| H | -0.7795401 | -0.8031046 | 94.3058684 |
| H | 2.2442990  | -0.9562887 | 91.2032970 |
| H | 1.4453958  | -1.6129102 | 93.4529774 |
| C | 1.4931254  | -3.6740451 | 88.7289084 |
| C | 2.7564125  | -4.1613396 | 88.3014674 |
| O | 0.2933318  | -1.9458695 | 89.2073747 |
| H | 0.6760323  | -4.3814858 | 88.9375309 |
| H | 2.9193485  | -5.2443819 | 88.1921560 |
| H | 4.7534829  | -3.6333010 | 87.6529231 |
| C | -1.9391185 | 4.5080938  | 88.9613204 |
| C | -1.8346568 | 3.1793831  | 88.4607613 |
| C | -2.7776351 | 5.4170044  | 88.2908672 |
| C | -2.5105114 | 2.8171263  | 87.2641750 |
| C | -3.3388262 | 3.7657904  | 86.6355645 |
| C | -3.5168294 | 5.0606065  | 87.1484997 |
| H | -2.8748172 | 6.4434230  | 88.6831116 |
| C | -2.4091028 | 1.4176652  | 86.6584555 |
| H | -3.8787223 | 3.4676674  | 85.7242898 |
| C | -1.7747792 | 1.4486516  | 85.2553987 |
| H | -2.3907041 | 2.0404321  | 84.5449137 |
| H | -1.6854041 | 0.4217828  | 84.8444946 |
| H | -0.7632955 | 1.8953174  | 85.2928795 |
| C | -3.7746833 | 0.7066007  | 86.6499927 |
| H | -1.7392287 | 0.8149679  | 87.3038715 |
| H | -4.5051660 | 1.2297919  | 85.9978999 |
| H | -4.2091329 | 0.6609027  | 87.6690807 |
| H | -3.6745670 | -0.3320105 | 86.2720627 |
| C | -4.5342441 | 6.0403890  | 86.5737041 |
| C | -4.8320456 | 5.8406682  | 85.0815587 |
| H | -5.4721785 | 6.6625684  | 84.6999830 |

|    |            |            |            |
|----|------------|------------|------------|
| H  | -5.3845915 | 4.8949027  | 84.9001071 |
| H  | -3.9040116 | 5.8038448  | 84.4773099 |
| C  | -5.8348737 | 5.9912693  | 87.4013744 |
| H  | -4.1028495 | 7.0579557  | 86.7008306 |
| H  | -6.5679340 | 6.7427690  | 87.0402831 |
| H  | -5.6381632 | 6.1885133  | 88.4740611 |
| H  | -6.3057376 | 4.9886867  | 87.3274478 |
| C  | -1.1754670 | 4.9783654  | 90.2000099 |
| C  | -0.1991261 | 6.1209642  | 89.8704311 |
| H  | 0.3485003  | 6.4420907  | 90.7802941 |
| H  | -0.7240967 | 7.0126049  | 89.4668868 |
| H  | 0.5501374  | 5.7888224  | 89.1282127 |
| C  | -2.1334636 | 5.3602448  | 91.3427537 |
| H  | -0.5595557 | 4.1287335  | 90.5567632 |
| H  | -1.5652527 | 5.6420111  | 92.2530732 |
| H  | -2.8078488 | 4.5199181  | 91.6062744 |
| H  | -2.7724792 | 6.2251714  | 91.0666477 |
| H  | 8.8752385  | 4.2209491  | 85.5045941 |
| H  | 7.9078157  | 2.1917039  | 90.5845957 |
| H  | 5.4163065  | -0.9169791 | 83.7273450 |
| C  | 8.2024142  | 4.6388300  | 86.2891694 |
| H  | 5.0086883  | 2.9683515  | 91.6918904 |
| H  | 8.0411780  | 6.5776023  | 85.2675487 |
| H  | 4.0758968  | 1.2252890  | 83.0116922 |
| C  | 7.2860961  | 3.4971690  | 86.7213645 |
| C  | 7.0909892  | 1.4407374  | 90.6164679 |
| C  | 7.3774618  | 5.7699421  | 85.6409571 |
| H  | 6.6752557  | 6.2075243  | 86.3806374 |
| C  | 6.9779220  | 3.2301299  | 88.0632333 |
| C  | 5.9184598  | -0.3392791 | 84.5315723 |
| H  | 9.6736739  | 4.3969518  | 87.9118828 |
| C  | 6.6711044  | 2.6977121  | 85.7394447 |
| C  | 9.0839046  | 5.1935625  | 87.4143221 |
| H  | 9.7941816  | 5.9445286  | 87.0131429 |
| H  | 6.9080256  | 2.8959865  | 84.6822727 |
| C  | 5.2569882  | 3.2081929  | 90.6369794 |
| H  | 6.8901941  | 1.2091155  | 91.6832947 |
| H  | 7.4652331  | 0.5183068  | 90.1273455 |
| C  | 6.0770531  | 2.2151602  | 88.4373246 |
| C  | 4.7908604  | 1.7434807  | 83.6826619 |
| C  | 5.7480051  | 1.6870441  | 86.0537840 |
| H  | 6.0841577  | -1.0230144 | 85.3858607 |
| H  | 6.9159679  | -0.0275863 | 84.1567359 |
| C  | 5.8201760  | 1.9673975  | 89.9231951 |
| C  | 5.4494342  | 1.4422868  | 87.4251200 |
| C  | 5.0821542  | 0.8922651  | 84.9302756 |
| H  | 4.3423126  | 3.5780287  | 90.1359119 |
| H  | 4.3676568  | 2.7307694  | 83.9580504 |
| H  | 5.9845920  | 4.0451959  | 90.6442930 |
| H  | 6.7712912  | 5.4012249  | 84.7896977 |
| H  | 5.7070848  | 1.9464906  | 83.0901073 |
| H  | 8.4721891  | 5.7031982  | 88.1875122 |
| H  | 5.0578907  | 1.1655109  | 90.0066846 |
| H  | 4.1051428  | 0.5389604  | 85.3204950 |
| H  | 7.4367527  | 3.8384822  | 88.8552024 |
| Zn | 3.1147127  | 5.8751601  | 87.2409827 |
| Br | 4.7981266  | 6.5232768  | 88.6797394 |
| C  | -2.3168307 | 10.0883796 | 85.5594158 |
| C  | 0.5460656  | 7.0885386  | 86.5437880 |
| C  | -1.1773873 | 10.4411599 | 86.3105247 |
| C  | -1.5875495 | 7.7727050  | 85.4952851 |
| C  | -0.4398304 | 8.1255615  | 86.2399783 |
| C  | -2.5197227 | 8.7597793  | 85.1487020 |
| C  | -0.2348385 | 9.4659814  | 86.6452680 |
| O  | 1.6391541  | 7.3427577  | 87.0798879 |
| H  | -3.0540328 | 10.8614582 | 85.2920813 |
| H  | -1.7310831 | 6.7250989  | 85.1894810 |
| H  | -1.0296673 | 11.4846076 | 86.6275096 |
| H  | -3.4103390 | 8.4916935  | 84.5608072 |
| H  | 0.6712982  | 9.7094390  | 87.2202809 |
| Br | 3.5078239  | 5.6616507  | 84.7550902 |

|    |            |           |            |
|----|------------|-----------|------------|
| Zn | 2.1191319  | 3.6944679 | 84.2193974 |
| H  | -2.2228104 | 5.6937474 | 81.4645197 |
| H  | 1.8191600  | 2.9830075 | 81.6141237 |
| C  | -0.9448000 | 3.9046322 | 81.4242980 |
| C  | -2.1030090 | 4.6974813 | 81.9462625 |
| H  | -0.8659916 | 3.5741243 | 80.3792231 |
| C  | -0.0621211 | 3.6659516 | 82.4314758 |
| C  | 1.2430958  | 2.9755772 | 82.5589620 |
| C  | -0.6166681 | 4.3571116 | 83.6254362 |
| O  | -1.8189439 | 4.9162994 | 83.3426631 |
| O  | -0.0738027 | 4.4828442 | 84.7228356 |
| H  | -3.0760138 | 4.1635436 | 81.8625716 |
| H  | 1.0745014  | 1.9093679 | 82.8363481 |
| H  | 0.2848145  | 6.0424256 | 86.2543508 |

### 14t-ma

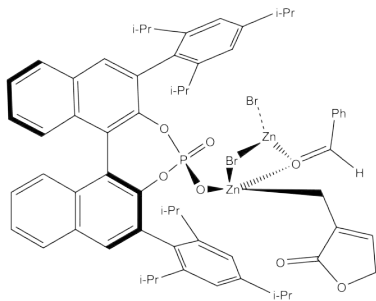

Energy (Hartree) = -11970.01509781

|   |            |            |            |
|---|------------|------------|------------|
| C | -0.3191773 | 1.8346504  | 88.2201213 |
| C | 0.4406176  | 0.7282154  | 88.6088473 |
| C | 0.0006765  | -0.0452267 | 89.7429658 |
| C | 0.7799309  | -1.0977910 | 90.3116604 |
| C | -1.2622665 | 0.2802479  | 90.3593087 |
| C | -1.7101069 | -0.4840845 | 91.4775659 |
| C | -2.0310111 | 1.3637133  | 89.8471822 |
| H | -3.0087790 | 1.5829368  | 90.3033205 |
| C | -1.5827102 | 2.1609951  | 88.8001494 |
| C | 4.0701785  | 1.0293334  | 87.4528555 |
| C | 4.2891566  | -0.2264511 | 86.8988754 |
| H | 5.3093235  | -0.5029251 | 86.5906573 |
| C | 3.2379918  | -1.1768602 | 86.7419649 |
| C | 3.4524751  | -2.4269754 | 86.0890964 |
| C | 1.9320812  | -0.8820167 | 87.2801622 |
| C | 0.8966109  | -1.8518965 | 87.1271612 |
| C | 1.7080722  | 0.3986049  | 87.9010358 |
| C | 2.7357105  | 1.3435424  | 87.8566285 |
| O | 0.1305412  | 2.6248803  | 87.1714847 |
| O | 2.4754932  | 2.6414471  | 88.2902733 |
| P | 1.5124245  | 3.5648472  | 87.3136931 |
| O | 1.3214435  | 4.9341751  | 87.8699123 |
| O | 2.0463230  | 3.3962042  | 85.8260564 |
| C | -0.9386095 | -1.5146321 | 91.9921507 |
| C | 0.3215353  | -1.8130229 | 91.4090959 |
| H | -2.6804077 | -0.2297799 | 91.9325265 |
| H | -1.2933710 | -2.0928759 | 92.8588183 |
| H | 1.7615906  | -1.3327912 | 89.8771920 |
| H | 0.9440690  | -2.6150190 | 91.8343076 |
| C | 1.1358228  | -3.0539955 | 86.4756027 |
| C | 2.4242482  | -3.3487348 | 85.9553395 |
| H | -0.1069193 | -1.6244923 | 87.5138554 |
| H | 0.3182873  | -3.7811700 | 86.3562705 |
| H | 2.6034272  | -4.3067850 | 85.4439426 |
| H | 4.4540937  | -2.6435843 | 85.6855760 |
| C | -2.3489807 | 4.5819127  | 88.7901632 |
| C | -2.4327504 | 3.2677389  | 88.2538889 |
| C | -3.2369499 | 5.5577168  | 88.3058687 |

|   |            |            |            |
|---|------------|------------|------------|
| C | -3.3664086 | 2.9690624  | 87.2272410 |
| C | -4.2404469 | 3.9830364  | 86.7858015 |
| C | -4.2076058 | 5.2788210  | 87.3246606 |
| H | -3.1815573 | 6.5783669  | 88.7159020 |
| C | -3.4935720 | 1.5559263  | 86.6580471 |
| H | -4.9757785 | 3.7388146  | 86.0062375 |
| C | -3.6894681 | 1.5227554  | 85.1355895 |
| H | -4.6606780 | 1.9633197  | 84.8285739 |
| H | -3.6851425 | 0.4748919  | 84.7708518 |
| H | -2.8853596 | 2.0600570  | 84.5977512 |
| C | -4.6207028 | 0.7861120  | 87.3739626 |
| H | -2.5427330 | 1.0246375  | 86.8769360 |
| H | -5.5998446 | 1.2826180  | 87.2090508 |
| H | -4.4499880 | 0.7358530  | 88.4674585 |
| H | -4.6955246 | -0.2529905 | 86.9912213 |
| C | -5.2029018 | 6.3672787  | 86.9311087 |
| C | -5.9704461 | 6.0851020  | 85.6349865 |
| H | -6.5875525 | 6.9615665  | 85.3512701 |
| H | -6.6610409 | 5.2234325  | 85.7488082 |
| H | -5.2882161 | 5.8621335  | 84.7910274 |
| C | -6.1847691 | 6.6384593  | 88.0894939 |
| H | -4.6067735 | 7.2945375  | 86.7747617 |
| H | -6.8704594 | 7.4757123  | 87.8429659 |
| H | -5.6519514 | 6.8966249  | 89.0261812 |
| H | -6.8023359 | 5.7389602  | 88.2944580 |
| C | -1.3798039 | 4.9123366  | 89.9245452 |
| C | -0.7803424 | 6.3234747  | 89.8409562 |
| H | -0.0237722 | 6.4582280  | 90.6400379 |
| H | -1.5478116 | 7.1131264  | 89.9828878 |
| H | -0.2673182 | 6.4796047  | 88.8742716 |
| C | -2.0633443 | 4.6918762  | 91.2890919 |
| H | -0.5314217 | 4.1998304  | 89.8515930 |
| H | -1.3561596 | 4.8938753  | 92.1199999 |
| H | -2.4325584 | 3.6537158  | 91.4024281 |
| H | -2.9326305 | 5.3727627  | 91.4055335 |
| H | 8.8704249  | 5.0505736  | 87.9233560 |
| H | 6.8151926  | 0.8896046  | 91.5548258 |
| H | 5.6933818  | 2.0062250  | 83.3956095 |
| C | 8.5667488  | 4.5182798  | 88.8517952 |
| H | 3.7075849  | 1.3007836  | 91.9137372 |
| H | 8.9988443  | 6.2715803  | 90.1015783 |
| H | 4.6332632  | 4.2949454  | 83.8581499 |
| C | 7.3942505  | 3.6191294  | 88.4800875 |
| C | 6.1176702  | 0.2513844  | 90.9735702 |
| C | 8.1553344  | 5.5842060  | 89.8834395 |
| H | 7.8484286  | 5.1168912  | 90.8425373 |
| C | 6.7833594  | 2.7869318  | 89.4348117 |
| C | 6.1178110  | 1.9924167  | 84.4209780 |
| H | 10.0931970 | 2.9572789  | 88.5816581 |
| C | 6.8800188  | 3.6060197  | 87.1743709 |
| C | 9.7795107  | 3.7047589  | 89.3378281 |
| H | 10.6439026 | 4.3686141  | 89.5467625 |
| H | 7.3465973  | 4.2597279  | 86.4203285 |
| C | 4.2220774  | 1.9405099  | 91.1665256 |
| H | 5.6175834  | -0.4262920 | 91.6958911 |
| H | 6.7252303  | -0.3685457 | 90.2835531 |
| C | 5.7007984  | 1.9501543  | 89.1148528 |
| C | 5.1316808  | 4.2863076  | 84.8498551 |
| C | 5.7862617  | 2.8001733  | 86.8031075 |
| H | 6.1653955  | 0.9370919  | 84.7565961 |
| H | 7.1589750  | 2.3746385  | 84.3688768 |
| C | 5.0749332  | 1.0847975  | 90.2095191 |
| C | 5.2011047  | 1.9568917  | 87.7808023 |
| C | 5.2605717  | 2.8471226  | 85.3717257 |
| H | 3.4531146  | 2.5141940  | 90.6134214 |
| H | 4.5625571  | 4.9287674  | 85.5541520 |
| H | 4.8546307  | 2.6675753  | 91.7180807 |
| H | 7.3012406  | 6.1890073  | 89.5185405 |
| H | 6.1159966  | 4.7770825  | 84.7035676 |
| H | 9.5474156  | 3.1561261  | 90.2746105 |
| H | 4.3906714  | 0.3633385  | 89.7179261 |



|    |            |            |            |   |            |            |            |
|----|------------|------------|------------|---|------------|------------|------------|
| H  | 4.2400888  | 2.4132859  | 85.3830607 | O | 1.7916713  | 4.9435500  | 87.8763660 |
| H  | 7.1630258  | 2.7879002  | 90.4689111 | O | 1.7388257  | 3.4327278  | 85.7272032 |
| Zn | 2.1163116  | 4.9281135  | 84.5124573 | C | -1.0199074 | -2.1358200 | 91.3339197 |
| Br | 2.3841726  | 7.1900665  | 84.6914338 | C | 0.2487543  | -2.3022113 | 90.7204915 |
| C  | -2.3813281 | 8.6966770  | 85.5055677 | H | -2.7566547 | -0.8562690 | 91.5197891 |
| C  | -1.2660309 | 4.7758436  | 84.3128450 | H | -1.3811868 | -2.8754733 | 92.0642878 |
| C  | -1.3459365 | 8.0341652  | 86.1897587 | H | 1.7017251  | -1.5296205 | 89.3376306 |
| C  | -2.7043874 | 6.7715628  | 84.0669408 | H | 0.8790339  | -3.1630582 | 90.9910706 |
| C  | -1.6472229 | 6.1085580  | 84.7376895 | C | 1.1675382  | -2.8575530 | 85.8997681 |
| C  | -3.0599520 | 8.0694717  | 84.4422736 | C | 2.4713427  | -3.0794915 | 85.3837051 |
| C  | -0.9668216 | 6.7445799  | 85.8073618 | H | -0.1241205 | -1.5602910 | 87.0405278 |
| O  | -0.2017159 | 4.2347082  | 84.6925134 | H | 0.3626853  | -3.5761286 | 85.6839980 |
| H  | -2.6696542 | 9.7156889  | 85.8075100 | H | 2.6761866  | -3.9727958 | 84.7745079 |
| H  | -3.2257171 | 6.2617687  | 83.2413627 | H | 4.4913130  | -2.3182958 | 85.2290423 |
| H  | -0.8284857 | 8.5260501  | 87.0263668 | C | -2.0393621 | 4.4718913  | 89.8650598 |
| H  | -3.8725756 | 8.5944404  | 83.9186736 | C | -2.2964026 | 3.4597499  | 88.9039601 |
| H  | -0.1663125 | 6.2104278  | 86.3410494 | C | -2.7789668 | 5.6677362  | 89.7976418 |
| Br | 2.1007073  | 3.3742283  | 82.6240007 | C | -3.2228882 | 3.6853612  | 87.8529745 |
| Zn | 0.7346342  | 2.3103448  | 84.5534070 | C | -3.9365853 | 4.8963227  | 87.8325947 |
| H  | 0.4047473  | -0.1932759 | 79.9624233 | C | -3.7417272 | 5.8965475  | 88.8015828 |
| H  | 0.6822956  | -0.2931268 | 84.8321846 | H | -2.5933533 | 6.4571293  | 90.5439876 |
| C  | 0.1684040  | -0.7061591 | 82.0811992 | C | -3.4455876 | 2.6625220  | 86.7427911 |
| C  | -0.3830454 | -0.4000339 | 80.7229204 | H | -4.6638962 | 5.0663651  | 87.0226693 |
| H  | 0.8174242  | -1.5666078 | 82.2962135 | C | -3.2440521 | 3.2857759  | 85.3498944 |
| C  | -0.2588481 | 0.2346155  | 82.9642693 | H | -4.0092893 | 4.0580944  | 85.1267299 |
| C  | 0.0129205  | 0.4692406  | 84.3929245 | H | -3.3039522 | 2.5136000  | 84.5563009 |
| C  | -1.0846007 | 1.2053920  | 82.1818567 | H | -2.2490009 | 3.7712091  | 85.2827537 |
| O  | -1.1716765 | 0.7857227  | 80.8841218 | C | -4.8193494 | 1.9805173  | 86.8668725 |
| O  | -1.6043138 | 2.2411925  | 82.5662921 | H | -2.6769927 | 1.8691885  | 86.8570025 |
| H  | -1.0304124 | -1.2102190 | 80.3160374 | H | -5.6433039 | 2.7186874  | 86.7717096 |
| H  | -0.9291863 | 0.5006439  | 84.9808659 | H | -4.9318352 | 1.4783735  | 87.8494677 |
| H  | -1.9245973 | 4.2134824  | 83.6100649 | H | -4.9529614 | 1.2187862  | 86.0713596 |

### 14κ-ma

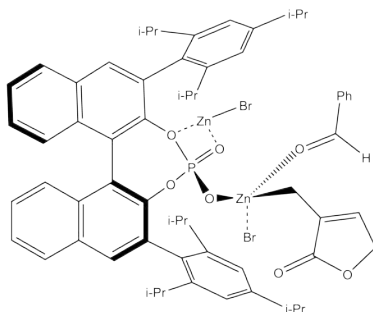

Energy (Hartree) = -11969.98127604

|   |            |            |            |   |           |            |            |
|---|------------|------------|------------|---|-----------|------------|------------|
| C | -0.3620805 | 1.9136145  | 88.3263869 | H | 7.0094151 | 0.7580780  | 91.4473628 |
| C | 0.3773140  | 0.7216405  | 88.4284587 | H | 5.7181330 | 2.9992984  | 83.8147881 |
| C | -0.0695896 | -0.2474581 | 89.4125239 | C | 7.3910216 | 5.3259628  | 89.6968206 |
| C | 0.7103273  | -1.3850468 | 89.7862346 | H | 4.0351728 | -0.0465201 | 91.4636331 |
| C | -1.3276963 | -0.0486137 | 90.0904306 | H | 8.2310762 | 6.0248549  | 91.5805778 |
| C | -1.7855643 | -1.0220148 | 91.0275947 | H | 4.0019283 | 4.9061934  | 84.2722107 |
| C | -2.0668841 | 1.1442421  | 89.8561676 | C | 6.5903628 | 4.1883792  | 89.0800332 |
| H | -3.0208151 | 1.2993507  | 90.3833031 | C | 6.6781007 | 0.0883578  | 90.6269992 |
| C | -1.5847274 | 2.1468149  | 89.0287809 | C | 7.7432651 | 5.1171299  | 91.1730680 |
| C | 4.0381664  | 1.1174080  | 87.3624527 | H | 8.4555481 | 4.2764316  | 91.3102826 |
| C | 4.2884699  | -0.0688590 | 86.6895743 | C | 6.4992638 | 2.9141523  | 89.6494117 |
| H | 5.3086016  | -0.3047260 | 86.3516074 | C | 6.0061666 | 3.0054302  | 84.8844687 |
| C | 3.2353344  | -0.9938239 | 86.4146637 | H | 8.4137768 | 5.8097211  | 87.7952588 |
| C | 3.4810266  | -2.1639121 | 85.6376938 | C | 5.8989160 | 4.4146852  | 87.8613348 |
| C | 1.9066372  | -0.7671621 | 86.9387905 | C | 8.6554591 | 5.6050296  | 88.8575851 |
| C | 0.8927149  | -1.7302603 | 86.6609626 | H | 9.2038123 | 6.4822342  | 89.2571531 |
| C | 1.6436304  | 0.4467570  | 87.6776764 | H | 6.0054921 | 5.3897553  | 87.3595068 |
| C | 2.6893472  | 1.3607660  | 87.7486048 | C | 4.2756741 | 0.8774109  | 90.8990115 |
| O | -0.0277286 | 2.9585291  | 87.4700713 |   |           |            |            |
| O | 2.3992978  | 2.6297570  | 88.2400175 |   |           |            |            |
| P | 1.4410193  | 3.5982834  | 87.1990307 |   |           |            |            |

|    |            |            |            |   |            |            |            |
|----|------------|------------|------------|---|------------|------------|------------|
| H  | 6.4558631  | -0.8953126 | 91.0871608 | H | 0.3597916  | 5.6339556  | 0.9273378  |
| H  | 7.5296242  | -0.0445520 | 89.9295222 | C | 0.2540750  | 3.5063585  | 0.6188537  |
| C  | 5.6901989  | 1.8923671  | 89.0986864 | C | 3.5658828  | -1.1748801 | -0.7140733 |
| C  | 4.4231289  | 4.9440577  | 85.2955650 | C | 4.6326374  | -1.4295629 | 0.1383295  |
| C  | 5.1974797  | 3.3791738  | 87.1896214 | H | 5.2168345  | -2.3541244 | 0.0115432  |
| H  | 6.2691661  | 1.9648290  | 85.1595171 | C | 4.9583571  | -0.5519812 | 1.2149992  |
| H  | 6.9075318  | 3.6396000  | 85.0211619 | C | 5.9962208  | -0.8775428 | 2.1388005  |
| C  | 5.4316766  | 0.6242011  | 89.9073793 | C | 4.1970981  | 0.6602845  | 1.4127935  |
| C  | 5.0399565  | 2.1180795  | 87.8576700 | C | 4.4699433  | 1.4476695  | 2.5709754  |
| C  | 4.8210499  | 3.5278102  | 85.7248638 | C | 3.1808789  | 1.0100433  | 0.4477346  |
| H  | 3.3521938  | 1.2054868  | 90.3820971 | C | 2.8858932  | 0.0740721  | -0.5450626 |
| H  | 3.6375318  | 5.3717293  | 85.9506763 | O | 0.3346427  | 1.1131801  | 0.3533640  |
| H  | 4.5426627  | 1.6734763  | 91.6243311 | O | 1.9167093  | 0.3842351  | -1.4883423 |
| H  | 6.8364090  | 4.9144785  | 91.7764614 | P | 0.3255535  | 0.4021815  | -1.1306348 |
| H  | 5.2886919  | 5.6395149  | 85.2783407 | O | -0.2795199 | 1.3180657  | -2.2047295 |
| H  | 9.3411427  | 4.7326970  | 88.8833614 | O | -0.2737029 | -0.9948647 | -0.9510096 |
| H  | 5.0958246  | -0.1592794 | 89.1982309 | C | 4.4059144  | 6.1163638  | 0.5964357  |
| H  | 3.9692679  | 2.8544021  | 85.5078911 | C | 5.1601019  | 4.9320364  | 0.3852640  |
| H  | 7.0080561  | 2.7195542  | 90.6024026 | H | 2.4281918  | 6.9534074  | 0.8705667  |
| Zn | 3.5373960  | 4.4424557  | 88.8335364 | H | 4.9135562  | 7.0922006  | 0.6328022  |
| Br | 3.8377044  | 5.0412923  | 91.0351486 | H | 5.1308441  | 2.7873052  | 0.1718741  |
| C  | -2.9372830 | 6.8779771  | 80.8557132 | H | 6.2496865  | 4.9956169  | 0.2432452  |
| C  | -0.7290243 | 3.7477571  | 82.7238259 | C | 5.4735225  | 1.0905762  | 3.4614309  |
| C  | -1.6366381 | 7.1451945  | 81.3287900 | C | 6.2565859  | -0.0721789 | 3.2373568  |
| C  | -2.7632316 | 4.5733412  | 81.5999215 | H | 3.8676736  | 2.3473436  | 2.7588241  |
| C  | -1.4582624 | 4.8405662  | 82.0760542 | H | 5.6598885  | 1.7131078  | 4.3498431  |
| C  | -3.4996518 | 5.5965295  | 80.9886376 | H | 7.0565114  | -0.3409679 | 3.9439361  |
| C  | -0.8945468 | 6.1297447  | 81.9377403 | H | 6.5777957  | -1.7974225 | 1.9696883  |
| O  | 0.4293334  | 3.8423271  | 83.1604425 | C | -2.0553898 | 3.6222197  | -0.4441683 |
| H  | -3.5180223 | 7.6818665  | 80.3769124 | C | -1.2373886 | 3.3853354  | 0.6966736  |
| H  | -3.1745465 | 3.5565151  | 81.7144272 | C | -3.4338623 | 3.3755001  | -0.3390890 |
| H  | -1.2087583 | 8.1532403  | 81.2180535 | C | -1.8209123 | 2.9543753  | 1.9156208  |
| H  | -4.5149451 | 5.3976941  | 80.6137369 | C | -3.2061686 | 2.7007009  | 1.9599115  |
| H  | 0.1226771  | 6.3038780  | 82.3203224 | C | -4.0292222 | 2.8846150  | 0.8383295  |
| Br | 3.1672541  | 1.2966699  | 83.2227660 | H | -4.0789556 | 3.5483877  | -1.2147881 |
| Zn | 1.1698099  | 2.1012354  | 84.2191420 | C | -0.9817835 | 2.7669667  | 3.1793575  |
| H  | -0.0537944 | -1.5115584 | 80.8381369 | H | -3.6436391 | 2.3416781  | 2.9035580  |
| H  | -0.0769698 | 0.3197022  | 85.4927750 | C | -0.9260204 | 1.2963812  | 3.6232380  |
| C  | -0.0141486 | -1.0668662 | 82.9790509 | H | -1.9262093 | 0.9314470  | 3.9335103  |
| C  | -0.6980636 | -1.5626652 | 81.7465554 | H | -0.2419988 | 1.1691819  | 4.4879143  |
| H  | 0.9118395  | -1.4988640 | 83.3809547 | H | -0.5643634 | 0.6484272  | 2.7999790  |
| C  | -0.6821400 | 0.0175565  | 83.4683646 | C | -1.4691438 | 3.6800384  | 4.3184307  |
| C  | -0.4137142 | 0.8989983  | 84.6139245 | H | 0.0554705  | 3.0764825  | 2.9387944  |
| C  | -1.8303039 | 0.2535654  | 82.5405722 | H | -2.4989590 | 3.4179414  | 4.6396859  |
| O  | -1.8220509 | -0.6947496 | 81.5517755 | H | -1.4764474 | 4.7439963  | 4.0067888  |
| O  | -2.6771725 | 1.1368497  | 82.5675731 | H | -0.8098395 | 3.5855217  | 5.2060818  |
| H  | -1.0706558 | -2.6104238 | 81.8258166 | C | -5.5098608 | 2.5176447  | 0.8208777  |
| H  | -1.3081130 | 1.4869507  | 84.8891439 | C | -5.7105236 | 1.2000684  | 0.0422112  |
| H  | -1.2986522 | 2.7908819  | 82.8201211 | H | -6.7826317 | 0.9156261  | 0.0038140  |
|    |            |            |            | H | -5.1393756 | 0.3725192  | 0.5119155  |
|    |            |            |            | H | -5.3367173 | 1.2804628  | -0.9977657 |
|    |            |            |            | C | -6.1602897 | 2.4506969  | 2.2082157  |
|    |            |            |            | H | -6.0301232 | 3.3199771  | 0.2499200  |
|    |            |            |            | H | -7.2519805 | 2.2802013  | 2.1173518  |
|    |            |            |            | H | -6.0055968 | 3.3875151  | 2.7806012  |
|    |            |            |            | H | -5.7498547 | 1.6171664  | 2.8159939  |
|    |            |            |            | C | -1.4662279 | 4.1445938  | -1.7537296 |
|    |            |            |            | C | -2.2116423 | 3.6428727  | -3.0023833 |
|    |            |            |            | H | -1.5810948 | 3.7386153  | -3.9095048 |
|    |            |            |            | H | -3.1469083 | 4.2077790  | -3.1975837 |
|    |            |            |            | H | -2.5306444 | 2.5838008  | -2.8781388 |
|    |            |            |            | C | -1.4088556 | 5.6847338  | -1.7701966 |
|    |            |            |            | H | -0.4277794 | 3.7609954  | -1.8146710 |
|    |            |            |            | H | -0.9701443 | 6.0515743  | -2.7211561 |
|    |            |            |            | H | -0.7947007 | 6.0818021  | -0.9396421 |
|    |            |            |            | H | -2.4270053 | 6.1160343  | -1.6724333 |
|    |            |            |            | H | -0.2778494 | -4.9932812 | -3.7483723 |
|    |            |            |            | H | 4.6568193  | -1.8703717 | -5.2632283 |
|    |            |            |            | H | 2.5857621  | -5.5003006 | 1.4534706  |
|    |            |            |            | C | 0.1909100  | -4.1773764 | -4.3413554 |
|    |            |            |            | H | 3.6578471  | 1.1651911  | -4.8610727 |

### 14λ-int-ma

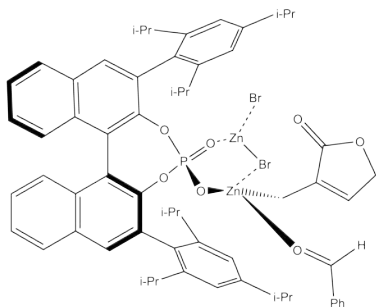

Energy (Hartree) = -11970.02312445

|   |           |           |           |
|---|-----------|-----------|-----------|
| C | 1.0377124 | 2.3189312 | 0.4699154 |
| C | 2.4382345 | 2.3023516 | 0.4889872 |
| C | 3.1227548 | 3.5746866 | 0.5160584 |
| C | 4.5353534 | 3.6934439 | 0.3475044 |
| C | 2.3528831 | 4.7847293 | 0.6780432 |
| C | 3.0286227 | 6.0403075 | 0.7334154 |
| C | 0.9328429 | 4.7095885 | 0.7583258 |

|    |            |            |            |
|----|------------|------------|------------|
| H  | -1.7296004 | -3.6200088 | -5.2672556 |
| H  | 1.1290142  | -3.5066721 | 2.0840476  |
| C  | 1.2453986  | -3.5355943 | -3.4498494 |
| C  | 4.9899555  | -1.2604942 | -4.3975093 |
| C  | -0.9099111 | -3.1543529 | -4.6819732 |
| H  | -0.5128429 | -2.3040702 | -5.2758172 |
| C  | 2.0552504  | -2.4888063 | -3.9270225 |
| C  | 2.3965173  | -5.2352689 | 0.3924825  |
| H  | 1.5673097  | -5.5515285 | -5.3647398 |
| C  | 1.3922994  | -3.9308353 | -2.1109416 |
| C  | 0.7881494  | -4.8030023 | -5.6127219 |
| H  | 0.0021021  | -5.3081598 | -6.2111549 |
| H  | 0.7719054  | -4.7576292 | -1.7331196 |
| C  | 3.0056488  | 0.3228761  | -4.5517653 |
| H  | 5.6599491  | -0.4630429 | -4.7813002 |
| H  | 5.5828145  | -1.9204793 | -3.7323005 |
| C  | 2.9148990  | -1.7734182 | -3.0800943 |
| C  | 1.1203651  | -3.1331489 | 1.0379548  |
| C  | 2.2548192  | -3.2581873 | -1.2223369 |
| H  | 3.2251057  | -5.6503741 | -0.2163261 |
| H  | 1.4574265  | -5.7405049 | 0.0915294  |
| C  | 3.7818376  | -0.6552516 | -3.6553825 |
| C  | 2.9762644  | -2.1285763 | -1.7022798 |
| C  | 2.3072273  | -3.7066184 | 0.2405551  |
| H  | 2.1282995  | 0.7464645  | -4.0268121 |
| H  | 1.1409433  | -2.0256761 | 1.0551284  |
| H  | 2.6376600  | -0.1596807 | -5.4802570 |
| H  | -1.3584105 | -2.7272320 | -3.7619421 |
| H  | 0.1665054  | -3.4417952 | 0.5660559  |
| H  | 1.2542530  | -4.0331829 | -6.2625448 |
| H  | 4.1883579  | -0.0724157 | -2.8023070 |
| H  | 3.2249236  | -3.2828982 | 0.6923961  |
| H  | 1.9872462  | -2.1930370 | -4.9856642 |
| Zn | -1.3310411 | 0.8778953  | -3.7764348 |
| Br | -0.7101304 | 1.1687596  | -5.9556831 |
| C  | -3.8718858 | -1.4216857 | 5.6217343  |
| C  | -2.2709034 | -1.5588945 | 1.6662891  |
| C  | -4.6240303 | -0.8982356 | 4.5510410  |
| C  | -2.1008805 | -2.0558080 | 4.0868668  |
| C  | -2.8504556 | -1.5293693 | 3.0101392  |
| C  | -2.6123831 | -2.0013890 | 5.3899308  |
| C  | -4.1178529 | -0.9505803 | 3.2495205  |
| O  | -2.8118494 | -1.0630788 | 0.6601656  |
| H  | -4.2719519 | -1.3741283 | 6.6461938  |
| H  | -1.1061447 | -2.4886167 | 3.8921243  |
| H  | -5.6078662 | -0.4423620 | 4.7402551  |
| H  | -2.0269141 | -2.4042367 | 6.2298446  |
| H  | -4.6798784 | -0.5374570 | 2.3994838  |
| Br | -3.2574662 | -0.3406384 | -2.9410178 |
| Zn | -2.0738064 | -1.7785032 | -1.1970631 |
| H  | -2.5841325 | -4.6373926 | 3.1642055  |
| H  | -3.9184875 | -3.4267119 | -1.5310971 |
| C  | -3.4895730 | -4.2025917 | 1.2166271  |
| C  | -2.9373378 | -5.1471478 | 2.2371460  |
| H  | -4.3720609 | -3.5729492 | 1.3926856  |
| C  | -2.7752504 | -4.3139694 | 0.0554772  |
| C  | -2.8712473 | -3.6357348 | -1.2352092 |
| C  | -1.7166910 | -5.3478299 | 0.3095429  |
| O  | -1.8245114 | -5.7884199 | 1.6069967  |
| O  | -0.8797938 | -5.7839756 | -0.4550585 |
| H  | -3.6682919 | -5.9267051 | 2.5535635  |
| H  | -2.3583147 | -4.2144863 | -2.0280455 |
| H  | -1.2572572 | -2.0237513 | 1.5835983  |

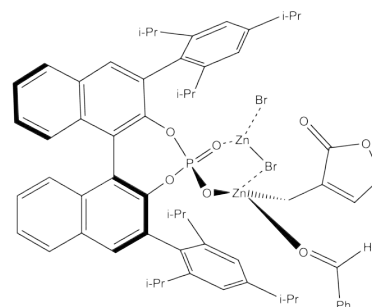

Energy (Hartree) = -11970.02360169

|   |            |            |            |
|---|------------|------------|------------|
| C | -0.3134578 | 1.1081466  | 89.0561488 |
| C | 0.4419596  | -0.0392201 | 89.3305813 |
| C | -0.0170879 | -0.9042144 | 90.3924000 |
| C | 0.7580239  | -1.9976905 | 90.8835421 |
| C | -1.2903984 | -0.6364377 | 91.0178674 |
| C | -1.7556669 | -1.5032236 | 92.0514081 |
| C | -2.0538825 | 0.4938278  | 90.6064488 |
| H | -3.0458739 | 0.6573847  | 91.0544649 |
| C | -1.5790375 | 1.3921799  | 89.6603809 |
| C | 3.9210954  | 0.5079509  | 87.7788471 |
| C | 4.1898519  | -0.7470369 | 87.2488418 |
| H | 5.1597457  | -0.9350344 | 86.7635367 |
| C | 3.2177043  | -1.7912572 | 87.2644445 |
| C | 3.4763158  | -3.0432680 | 86.6304560 |
| C | 1.9298248  | -1.5708199 | 87.8820853 |
| C | 0.9414066  | -2.5932019 | 87.7686171 |
| C | 1.6906920  | -0.3209344 | 88.5643143 |
| C | 2.6718606  | 0.6661231  | 88.4627694 |
| O | 0.1423751  | 2.0211560  | 88.0985732 |
| O | 2.4628550  | 1.8751952  | 89.1096282 |
| P | 1.4129012  | 2.9795295  | 88.5217385 |
| O | 1.0950458  | 3.8614883  | 89.7379372 |
| O | 1.8973753  | 3.6541640  | 87.2402230 |
| C | -0.9889264 | -2.5736055 | 92.4850531 |
| C | 0.2848634  | -2.8102834 | 91.9041683 |
| H | -2.7345853 | -1.2935122 | 92.5105795 |
| H | -1.3569194 | -3.2293227 | 93.2887495 |
| H | 1.7504276  | -2.1858529 | 90.4515599 |
| H | 0.9068846  | -3.6413268 | 92.2701117 |
| C | 1.2201299  | -3.7919749 | 87.1261955 |
| C | 2.5027299  | -4.0287371 | 86.5657842 |
| H | -0.0568151 | -2.4196985 | 88.1939601 |
| H | 0.4381459  | -4.5626874 | 87.0483704 |
| H | 2.7165154  | -4.9862959 | 86.0670439 |
| H | 4.4658402  | -3.2047980 | 86.1745205 |
| C | -2.2996054 | 3.8304121  | 89.8443113 |
| C | -2.3508803 | 2.5787253  | 89.1678192 |
| C | -2.9114297 | 4.9403822  | 89.2398661 |
| C | -3.0586146 | 2.4587078  | 87.9445263 |
| C | -3.6309576 | 3.6103257  | 87.3680999 |
| C | -3.5474026 | 4.8675573  | 87.9852723 |
| H | -2.8744650 | 5.9163938  | 89.7482840 |
| C | -3.2145415 | 1.1103811  | 87.2409134 |
| H | -4.1477779 | 3.5114400  | 86.4020506 |
| C | -2.4547761 | 1.0644886  | 85.9057672 |
| H | -2.8711197 | 1.7931378  | 85.1809276 |
| H | -2.5239116 | 0.0575500  | 85.4441667 |
| H | -1.3821651 | 1.3023649  | 86.0512947 |
| C | -4.6973092 | 0.7404593  | 87.0571226 |
| H | -2.7683824 | 0.3376085  | 87.8992923 |
| H | -5.2158679 | 1.4502867  | 86.3792390 |
| H | -5.2371878 | 0.7474614  | 88.0254974 |
| H | -4.7959296 | -0.2724873 | 86.6148108 |
| C | -4.0629548 | 6.1509660  | 87.3399880 |
| C | -2.8746112 | 7.0384529  | 86.9121839 |

14λ-ma

|    |            |           |            |    |            |           |            |
|----|------------|-----------|------------|----|------------|-----------|------------|
| H  | -3.2290358 | 7.9853544 | 86.4540909 | Br | 1.0243860  | 7.0436545 | 88.2644428 |
| H  | -2.2282932 | 6.5103004 | 86.1811283 | Zn | 1.7345863  | 5.4430631 | 86.3919414 |
| H  | -2.2236334 | 7.2961877 | 87.7708335 | H  | -0.5451466 | 7.6645008 | 82.3483593 |
| C  | -5.0300499 | 5.9241774 | 86.1719696 | H  | 3.3415160  | 7.2072925 | 85.3798686 |
| H  | -4.6193162 | 6.7036196 | 88.1314693 | C  | 1.3913795  | 7.7552497 | 83.3731536 |
| H  | -5.4321690 | 6.8916542 | 85.8092899 | C  | 0.5360790  | 7.4473438 | 82.1835739 |
| H  | -5.8888504 | 5.2863208 | 86.4636367 | H  | 1.4920659  | 8.7619896 | 83.8018475 |
| H  | -4.5251361 | 5.4358583 | 85.3121829 | C  | 1.9850442  | 6.6121466 | 83.8147356 |
| C  | -1.6149262 | 3.9712466 | 91.2029289 | C  | 2.8506286  | 6.3074950 | 84.9629849 |
| C  | -1.0201666 | 5.3680073 | 91.4500211 | C  | 1.5211841  | 5.5177035 | 82.9086517 |
| H  | -0.2597515 | 5.3400788 | 92.2566380 | O  | 0.6804135  | 6.0403768 | 81.9580216 |
| H  | -1.7870808 | 6.1109607 | 91.7530422 | O  | 1.7717609  | 4.3249218 | 82.9581856 |
| H  | -0.5644169 | 5.7780386 | 90.5212106 | H  | 0.8434300  | 7.9905837 | 81.2604809 |
| C  | -2.5744799 | 3.6053226 | 92.3523926 | H  | 3.6154565  | 5.5520450 | 84.6912815 |
| H  | -0.7733671 | 3.2492889 | 91.2154190 | H  | 0.3825058  | 3.0775487 | 85.1296712 |
| H  | -2.0651085 | 3.6955106 | 93.3341489 |    |            |           |            |
| H  | -2.9481312 | 2.5676917 | 92.2595030 |    |            |           |            |
| H  | -3.4551216 | 4.2811803 | 92.3585481 |    |            |           |            |
| H  | 6.0543486  | 6.1373069 | 86.1894940 |    |            |           |            |
| H  | 7.4341903  | 2.1513427 | 90.4617093 |    |            |           |            |
| H  | 4.8243715  | 1.4488344 | 82.9173344 |    |            |           |            |
| C  | 6.1108087  | 5.8616522 | 87.2659218 |    |            |           |            |
| H  | 4.7267413  | 2.0548826 | 92.2101500 |    |            |           |            |
| H  | 5.3073666  | 7.8130573 | 87.8933838 |    |            |           |            |
| H  | 2.5493085  | 1.0605181 | 83.9884463 |    |            |           |            |
| C  | 5.7305080  | 4.3909642 | 87.3684567 |    |            |           |            |
| C  | 6.7412662  | 1.2853869 | 90.4119881 |    |            |           |            |
| C  | 5.0905291  | 6.7326208 | 88.0236859 |    |            |           |            |
| H  | 5.0940121  | 6.5185504 | 89.1130094 |    |            |           |            |
| C  | 5.7185487  | 3.7360275 | 88.6112841 |    |            |           |            |
| C  | 5.0688255  | 2.1213279 | 83.7643049 |    |            |           |            |
| H  | 8.2821960  | 5.5219222 | 87.1837180 |    |            |           |            |
| C  | 5.3383688  | 3.6592802 | 86.2347013 |    |            |           |            |
| C  | 7.5470610  | 6.1331971 | 87.7449135 |    |            |           |            |
| H  | 7.8124255  | 7.2023060 | 87.6116200 |    |            |           |            |
| H  | 5.3915895  | 4.1525334 | 85.2527294 |    |            |           |            |
| C  | 4.7544482  | 2.6276805 | 91.2606636 |    |            |           |            |
| H  | 6.7968804  | 0.7498455 | 91.3825681 |    |            |           |            |
| H  | 7.1129800  | 0.6049178 | 89.6192416 |    |            |           |            |
| C  | 5.2423971  | 2.4229472 | 88.7523270 |    |            |           |            |
| C  | 2.8519512  | 1.6718287 | 84.8642825 |    |            |           |            |
| C  | 4.8481480  | 2.3420291 | 86.3148028 |    |            |           |            |
| H  | 6.1719937  | 2.1554168 | 83.8697212 |    |            |           |            |
| H  | 4.7130646  | 3.1320699 | 83.4763988 |    |            |           |            |
| C  | 5.2999515  | 1.7503117 | 90.1226528 |    |            |           |            |
| C  | 4.7515287  | 1.7395305 | 87.6043160 |    |            |           |            |
| C  | 4.3817428  | 1.6202289 | 85.0443281 |    |            |           |            |
| H  | 3.7279676  | 2.9808226 | 91.0457879 |    |            |           |            |
| H  | 2.3115551  | 1.2915710 | 85.7521778 |    |            |           |            |
| H  | 5.3845468  | 3.5226796 | 91.4406106 |    |            |           |            |
| H  | 4.0593957  | 6.5515023 | 87.6589506 |    |            |           |            |
| H  | 2.5273064  | 2.7120867 | 84.6706133 |    |            |           |            |
| H  | 7.6642104  | 5.8954644 | 88.8227946 |    |            |           |            |
| H  | 4.6719278  | 0.8363589 | 90.0775247 |    |            |           |            |
| H  | 4.6611888  | 0.5532918 | 85.1605067 |    |            |           |            |
| H  | 6.0645547  | 4.2736440 | 89.5076697 |    |            |           |            |
| Zn | 1.6851338  | 5.6674296 | 90.1465808 |    |            |           |            |
| Br | 3.0264303  | 6.2483841 | 91.9049756 |    |            |           |            |
| C  | -3.0434934 | 3.3814806 | 81.6976391 |    |            |           |            |
| C  | -0.2841507 | 3.9429518 | 84.8970364 |    |            |           |            |
| C  | -3.1020346 | 4.5639907 | 82.4605732 |    |            |           |            |
| C  | -1.1903188 | 2.5796592 | 83.0429344 |    |            |           |            |
| C  | -1.2518828 | 3.7586485 | 83.8173539 |    |            |           |            |
| C  | -2.0843076 | 2.3938905 | 81.9827240 |    |            |           |            |
| C  | -2.2018051 | 4.7591766 | 83.5115683 |    |            |           |            |
| O  | -0.1662477 | 5.0039596 | 85.5353075 |    |            |           |            |
| H  | -3.7506886 | 3.2321705 | 80.8670449 |    |            |           |            |
| H  | -0.4276094 | 1.8210053 | 83.2773304 |    |            |           |            |
| H  | -3.8529761 | 5.3337701 | 82.2266715 |    |            |           |            |
| H  | -2.0363973 | 1.4791189 | 81.3734707 |    |            |           |            |
| H  | -2.2183159 | 5.6769235 | 84.1173609 |    |            |           |            |

### 14 $\mu$ -ma

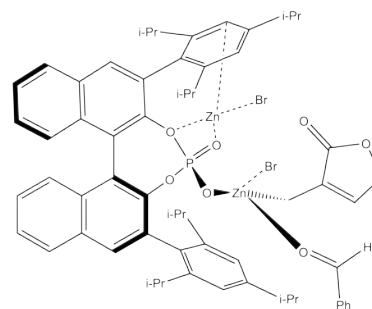

Energy (Hartree) = -11969.99152083

|   |            |            |            |
|---|------------|------------|------------|
| C | -0.2456420 | 1.9734331  | 88.5161731 |
| C | 0.4075115  | 0.7617935  | 88.2313088 |
| C | 0.0382740  | -0.4016808 | 89.0095001 |
| C | 0.7690532  | -1.6285665 | 88.9674499 |
| C | -1.0815800 | -0.3156120 | 89.9149312 |
| C | -1.4615013 | -1.4628191 | 90.6729489 |
| C | -1.7736988 | 0.9198167  | 90.0561407 |
| H | -2.6474848 | 0.9704304  | 90.7239381 |
| C | -1.3665264 | 2.0721047  | 89.3976132 |
| C | 3.8604561  | 1.4081287  | 86.6934981 |
| C | 3.9552540  | 0.4177515  | 85.7287540 |
| H | 4.8966014  | 0.2638297  | 85.1809028 |
| C | 2.8402169  | -0.4304572 | 85.4385459 |
| C | 2.9306782  | -1.4315784 | 84.4252146 |
| C | 1.6061070  | -0.3057763 | 86.1853392 |
| C | 0.5107036  | -1.1512113 | 85.8403863 |
| C | 1.5251773  | 0.6704424  | 87.2454141 |
| C | 2.6168600  | 1.5190064  | 87.3902491 |
| O | 0.0922483  | 3.1487257  | 87.8591995 |
| O | 2.5132972  | 2.5460300  | 88.3201513 |
| P | 1.5440146  | 3.8971659  | 87.9167323 |
| O | 1.9293373  | 4.7071789  | 89.1766564 |
| O | 1.8341767  | 4.4191680  | 86.5223612 |
| C | -0.7490058 | -2.6482751 | 90.5821647 |
| C | 0.3863982  | -2.7209773 | 89.7337367 |
| H | -2.3273985 | -1.3793700 | 91.3482443 |
| H | -1.0480690 | -3.5233942 | 91.1786722 |
| H | 1.6612968  | -1.7039065 | 88.3316424 |
| H | 0.9759243  | -3.6493444 | 89.6867640 |
| C | 0.6338225  | -2.1086125 | 84.8444571 |
| C | 1.8573096  | -2.2620678 | 84.1407386 |
| H | -0.4411095 | -1.0295387 | 86.3760670 |
| H | -0.2277789 | -2.7432921 | 84.5891624 |
| H | 1.9456191  | -3.0285226 | 83.3559220 |
| H | 3.8753022  | -1.5295301 | 83.8676382 |
| C | -1.7561647 | 4.2951420  | 90.5482739 |
| C | -2.1181145 | 3.3596714  | 89.5453123 |

|   |            |            |            |    |            |            |            |
|---|------------|------------|------------|----|------------|------------|------------|
| C | -2.5322758 | 5.4605065  | 90.6855817 | H  | 5.1578494  | -0.0128162 | 88.2190295 |
| C | -3.2057689 | 3.6233442  | 88.6709982 | H  | 3.7023428  | 3.4609699  | 85.0545666 |
| C | -3.9519283 | 4.7981065  | 88.8585792 | H  | 6.0526593  | 2.9403526  | 90.4330571 |
| C | -3.6354361 | 5.7297169  | 89.8609106 | Zn | 3.4108121  | 3.6560953  | 90.0431734 |
| H | -2.2586038 | 6.2011079  | 91.4523783 | Br | 3.4762634  | 3.3059393  | 92.3322534 |
| C | -3.5784916 | 2.6603283  | 87.5443241 | C  | -1.3061046 | -0.6034911 | 82.0054373 |
| H | -4.7924214 | 5.0081942  | 88.1794304 | C  | 0.1658576  | 2.6078725  | 84.3980256 |
| C | -3.8488294 | 3.3856592  | 86.2159810 | C  | -2.1985850 | 0.1137868  | 82.8283034 |
| H | -4.7463079 | 4.0352336  | 86.2717393 | C  | 0.5462650  | 0.7530210  | 82.7964610 |
| H | -4.0421904 | 2.6482878  | 85.4081812 | C  | -0.3468467 | 1.4809096  | 83.6126465 |
| H | -2.9847283 | 4.0134134  | 85.9246617 | C  | 0.0609554  | -0.2814048 | 81.9859453 |
| C | -4.7648142 | 1.7675974  | 87.9532817 | C  | -1.7248109 | 1.1603324  | 83.6234444 |
| H | -2.7066939 | 1.9937093  | 87.3732952 | O  | -0.5564244 | 3.4201599  | 84.9908213 |
| H | -5.6663359 | 2.3815861  | 88.1602749 | H  | -1.6844272 | -1.4216072 | 81.3727964 |
| H | -4.5382948 | 1.1884153  | 88.8712352 | H  | 1.6142648  | 1.0189291  | 82.7892224 |
| H | -5.0205184 | 1.0470643  | 87.1478691 | H  | -3.2679585 | -0.1466941 | 82.8383328 |
| C | -4.4247750 | 7.0238434  | 90.0097950 | H  | 0.7531468  | -0.8430879 | 81.3415101 |
| C | -4.2471508 | 7.9273078  | 88.7755096 | H  | -2.3961429 | 1.7511955  | 84.2642763 |
| H | -4.7571751 | 8.9024669  | 88.9214984 | Br | -0.8980496 | 6.4116914  | 87.1229148 |
| H | -4.6776379 | 7.4534137  | 87.8686709 | Zn | 0.3173860  | 5.3890975  | 85.3822214 |
| H | -3.1758148 | 8.1145690  | 88.5635975 | H  | -0.7010340 | 2.7494505  | 80.8782631 |
| C | -5.9113236 | 6.7632121  | 90.3089912 | H  | 0.2919559  | 6.9279498  | 83.3664279 |
| H | -3.9962836 | 7.5619159  | 90.8843018 | C  | -0.3576580 | 4.7729571  | 81.6433986 |
| H | -6.4564298 | 7.7166635  | 90.4690970 | C  | -0.0347895 | 3.6332267  | 80.7330485 |
| H | -6.0385126 | 6.1363158  | 91.2147181 | H  | -1.3222148 | 5.2994678  | 81.6324362 |
| H | -6.4056173 | 6.2372220  | 89.4653389 | C  | 0.7051492  | 5.0372628  | 82.4600500 |
| C | -0.5598935 | 4.0558318  | 91.4677405 | C  | 0.8933748  | 6.0130466  | 83.5377913 |
| C | 0.1923475  | 5.3484682  | 91.8207690 | C  | 1.7571201  | 4.0325520  | 82.1021972 |
| H | 1.1371908  | 5.1039753  | 92.3456890 | O  | 1.3004797  | 3.2445757  | 81.0691815 |
| H | -0.4016813 | 5.9982743  | 92.4964472 | O  | 2.8512399  | 3.8388376  | 82.6030738 |
| H | 0.4433094  | 5.9218593  | 90.9077103 | H  | -0.0689912 | 3.8994964  | 79.6513965 |
| C | -0.9714366 | 3.2931766  | 92.7412127 | H  | 1.9614542  | 6.2909495  | 83.6373243 |
| H | 0.1548927  | 3.4054688  | 90.9172147 | H  | 1.2805085  | 2.7240032  | 84.4242200 |
| H | -0.0840163 | 3.0891499  | 93.3753969 |    |            |            |            |
| H | -1.4508703 | 2.3227754  | 92.5021981 |    |            |            |            |
| H | -1.6949130 | 3.8886276  | 93.3367179 |    |            |            |            |
| H | 6.7662176  | 6.3250114  | 89.1869272 |    |            |            |            |
| H | 7.0470467  | 0.8706322  | 90.5025298 |    |            |            |            |
| H | 5.3742559  | 3.3726772  | 83.2760650 |    |            |            |            |
| C | 6.0983595  | 5.6905485  | 89.8114708 |    |            |            |            |
| H | 4.3536212  | -0.7502599 | 90.4384045 |    |            |            |            |
| H | 5.1262305  | 7.4897405  | 90.6154961 |    |            |            |            |
| H | 4.1761632  | 5.5123315  | 83.8605981 |    |            |            |            |
| C | 5.7360294  | 4.4960187  | 88.9317884 |    |            |            |            |
| C | 6.7825763  | 0.2954159  | 89.5910244 |    |            |            |            |
| C | 4.8437298  | 6.5322885  | 90.1330786 |    |            |            |            |
| H | 4.1834150  | 6.0002948  | 90.8543417 |    |            |            |            |
| C | 5.6936163  | 3.1585871  | 89.4166263 |    |            |            |            |
| C | 5.7198732  | 3.2894433  | 84.3249160 |    |            |            |            |
| H | 7.7577547  | 4.7175820  | 90.8841806 |    |            |            |            |
| C | 5.4486070  | 4.7043472  | 87.5670073 |    |            |            |            |
| C | 6.8507081  | 5.3192597  | 91.0948162 |    |            |            |            |
| H | 7.1681510  | 6.2364051  | 91.6294766 |    |            |            |            |
| H | 5.5283265  | 5.7262463  | 87.1702675 |    |            |            |            |
| C | 4.3111195  | 0.3237240  | 90.1655467 |    |            |            |            |
| H | 6.8444957  | -0.7801693 | 89.8535905 |    |            |            |            |
| H | 7.5504114  | 0.5067843  | 88.8199388 |    |            |            |            |
| C | 5.3198790  | 2.0776019  | 88.5717551 |    |            |            |            |
| C | 4.5195164  | 5.4304907  | 84.9084517 |    |            |            |            |
| C | 5.0163192  | 3.6752458  | 86.7128809 |    |            |            |            |
| H | 5.8665381  | 2.2160858  | 84.5563811 |    |            |            |            |
| H | 6.7074726  | 3.7876399  | 84.4198583 |    |            |            |            |
| C | 5.3667892  | 0.6403804  | 89.0911110 |    |            |            |            |
| C | 4.8721173  | 2.3640417  | 87.2558127 |    |            |            |            |
| C | 4.6798563  | 3.9478334  | 85.2550829 |    |            |            |            |
| H | 3.2797737  | 0.5305714  | 89.8159817 |    |            |            |            |
| H | 3.7613647  | 5.9138128  | 85.5549111 |    |            |            |            |
| H | 4.4753337  | 0.9123329  | 91.0907078 |    |            |            |            |
| H | 4.2455374  | 6.7616730  | 89.2293352 |    |            |            |            |
| H | 5.4774803  | 5.9853830  | 84.9977532 |    |            |            |            |
| H | 6.2018846  | 4.7452664  | 91.7889746 |    |            |            |            |

### 14*ν*-2-ma

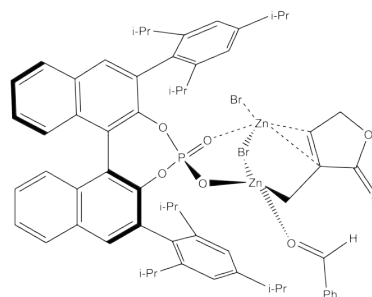

Energy (Hartree) = -11970.01802117

|   |            |            |            |
|---|------------|------------|------------|
| C | -0.9538267 | 1.4396031  | 89.4432599 |
| C | 0.1603764  | 0.6177078  | 89.6262731 |
| C | 0.5297429  | 0.2923123  | 90.9873911 |
| C | 1.7415045  | -0.3813082 | 91.3275601 |
| C | -0.3436652 | 0.6996270  | 92.0636916 |
| C | -0.0103262 | 0.3464575  | 93.4056860 |
| C | -1.4927925 | 1.4941453  | 91.7837328 |
| H | -2.1359862 | 1.8088512  | 92.6193436 |
| C | -1.7876412 | 1.9268665  | 90.4972746 |
| C | 2.5487215  | 0.8077649  | 86.6260191 |
| C | 2.9978050  | -0.5057316 | 86.5612473 |
| H | 3.8312079  | -0.7558176 | 85.8862712 |
| C | 2.3926157  | -1.5431909 | 87.3281388 |
| C | 2.7855696  | -2.9059781 | 87.1718990 |
| C | 1.3661223  | -1.2127067 | 88.2882723 |
| C | 0.7496212  | -2.2768285 | 89.0119595 |
| C | 0.9839034  | 0.1685845  | 88.4649646 |
| C | 1.4884820  | 1.0967005  | 87.5426490 |
| O | -1.3233331 | 1.7892778  | 88.1509016 |
| O | 1.0809132  | 2.4165568  | 87.5773017 |
| P | -0.4622952 | 2.9402341  | 87.3761445 |

|   |            |            |            |    |            |            |            |
|---|------------|------------|------------|----|------------|------------|------------|
| O | -0.4435112 | 4.2839657  | 88.1264746 | H  | 5.7223076  | 2.6907516  | 89.4520066 |
| O | -1.0087567 | 2.9001621  | 85.9472348 | H  | 5.9394559  | 1.8010575  | 87.9069807 |
| C | 1.1570302  | -0.3425360 | 93.6956013 | C  | 3.8516662  | 2.9688210  | 86.5107074 |
| C | 2.0471510  | -0.6900286 | 92.6460420 | C  | 0.8728755  | 1.4917435  | 83.2030852 |
| H | -0.6949205 | 0.6524104  | 94.2124660 | C  | 3.0206075  | 1.9657917  | 84.4198784 |
| H | 1.4042166  | -0.6023058 | 94.7361721 | H  | 3.9913174  | -0.0873274 | 82.7863919 |
| H | 2.4473982  | -0.6503263 | 90.5305894 | H  | 3.2262696  | 1.0976665  | 81.6832970 |
| H | 2.9919829  | -1.2049832 | 92.8776816 | C  | 4.0776465  | 2.9655849  | 88.0229632 |
| C | 1.1420623  | -3.5945704 | 88.8220309 | C  | 3.1567153  | 1.9236423  | 85.8339633 |
| C | 2.1775453  | -3.9142112 | 87.9044461 | C  | 2.2282618  | 0.9159774  | 83.6440724 |
| H | -0.0586384 | -2.0417117 | 89.7189135 | H  | 2.4590746  | 4.3846135  | 88.4608496 |
| H | 0.6413186  | -4.3981503 | 89.3833004 | H  | 0.2808521  | 1.8288176  | 84.0758128 |
| H | 2.4855919  | -4.9618283 | 87.7667446 | H  | 4.0845582  | 5.1406700  | 88.3620065 |
| H | 3.5764444  | -3.1430406 | 86.4429660 | H  | 3.2604313  | 6.6971140  | 84.0565713 |
| C | -2.7532527 | 4.2589756  | 90.6250125 | H  | 0.9958145  | 2.3641889  | 82.5289682 |
| C | -2.8767772 | 2.9080387  | 90.1887357 | H  | 6.7975569  | 5.2886376  | 84.5900129 |
| C | -3.7718338 | 5.1723799  | 90.2902252 | H  | 3.5256482  | 2.1068438  | 88.4542216 |
| C | -4.0026621 | 2.5152243  | 89.4110798 | H  | 2.0115426  | 0.0761669  | 84.3335192 |
| C | -4.9819994 | 3.4728960  | 89.0958241 | H  | 4.9276163  | 4.8292690  | 86.2879836 |
| C | -4.8903617 | 4.8086737  | 89.5234945 | Zn | -1.4298646 | 4.2193998  | 84.4961998 |
| H | -3.6863141 | 6.2177497  | 90.6282654 | Br | -2.1963099 | 3.2747884  | 82.5095033 |
| C | -4.2062561 | 1.0767565  | 88.9394671 | C  | 5.4362223  | 9.8562422  | 86.6425194 |
| H | -5.8521740 | 3.1592101  | 88.4972298 | C  | 1.5592231  | 8.1297352  | 86.9356728 |
| C | -4.3844621 | 0.9821319  | 87.4135967 | C  | 5.1968185  | 8.8560130  | 87.6068063 |
| H | -5.3185251 | 1.4793555  | 87.0775976 | C  | 3.1214137  | 9.7550645  | 85.9231486 |
| H | -4.4467717 | -0.0788747 | 87.0958330 | C  | 2.8771649  | 8.7487867  | 86.8866215 |
| H | -3.5322615 | 1.4474259  | 86.8809709 | C  | 4.4024442  | 10.3064486 | 85.8027221 |
| C | -5.3796119 | 0.4196322  | 89.6910333 | C  | 3.9220624  | 8.3001262  | 87.7311284 |
| H | -3.2959627 | 0.5007114  | 89.2009551 | O  | 1.2804687  | 7.1934336  | 87.7149032 |
| H | -6.3375123 | 0.9385725  | 89.4772277 | H  | 6.4449175  | 10.2861965 | 86.5431044 |
| H | -5.2215371 | 0.4482812  | 90.7882602 | H  | 2.3016994  | 10.0836270 | 85.2644619 |
| H | -5.4967906 | -0.6412390 | 89.3872259 | H  | 6.0161194  | 8.5094610  | 88.2544207 |
| C | -5.9692217 | 5.8268888  | 89.1746662 | H  | 4.6013084  | 11.0837780 | 85.0501869 |
| C | -6.1229641 | 6.0052808  | 87.6533786 | H  | 3.7063820  | 7.5061561  | 88.4616594 |
| H | -6.8805749 | 6.7819894  | 87.4210024 | Br | 0.6670012  | 5.5202115  | 84.8882784 |
| H | -6.4539322 | 5.0633617  | 87.1676908 | Zn | -0.3105963 | 6.0021753  | 87.1713533 |
| H | -5.1660784 | 6.3092479  | 87.1842245 | H  | -3.0628168 | 5.8445581  | 82.7333802 |
| C | -7.3128811 | 5.4700095  | 89.8358831 | H  | -2.7736146 | 6.0772462  | 87.8600718 |
| H | -5.6373343 | 6.8027680  | 89.5931847 | C  | -3.1403396 | 5.7534313  | 84.9576187 |
| H | -8.0772159 | 6.2469854  | 89.6270940 | C  | -3.3719257 | 6.4347932  | 83.6204675 |
| H | -7.2080501 | 5.3747395  | 90.9353055 | H  | -3.8184400 | 4.9627070  | 85.3213028 |
| H | -7.7035993 | 4.5043911  | 89.4522418 | C  | -2.5327851 | 6.6911399  | 85.7937946 |
| C | -1.5613105 | 4.7541907  | 91.4459208 | C  | -2.2160410 | 6.7513287  | 87.1855170 |
| C | -0.9672646 | 6.0719829  | 90.9190124 | C  | -2.0550595 | 7.8145802  | 84.8976619 |
| H | -0.0467688 | 6.3303478  | 91.4814003 | O  | -2.5798739 | 7.6374210  | 83.6600562 |
| H | -1.6683454 | 6.9250572  | 91.0295152 | O  | -1.3285681 | 8.7451354  | 85.1930304 |
| H | -0.6981355 | 5.9818435  | 89.8505402 | H  | -4.4401637 | 6.7215679  | 83.4893353 |
| C | -1.9394817 | 4.8939537  | 92.9333961 | H  | -2.0953467 | 7.7866704  | 87.5560707 |
| H | -0.7624627 | 3.9896232  | 91.3671719 | H  | 0.7867426  | 8.5058083  | 86.2162078 |
| H | -1.0627450 | 5.2068130  | 93.5377349 |    |            |            |            |
| H | -2.3216935 | 3.9425173  | 93.3533956 |    |            |            |            |
| H | -2.7350627 | 5.6565508  | 93.0682500 |    |            |            |            |
| H | 4.5027659  | 5.1438943  | 82.5214380 |    |            |            |            |
| H | 6.1944268  | 3.5711636  | 87.9631005 |    |            |            |            |
| H | 2.4384452  | -0.4772846 | 81.9719804 |    |            |            |            |
| C | 4.8510043  | 5.2582743  | 83.5716079 |    |            |            |            |
| H | 3.6359089  | 4.1724301  | 89.7980958 |    |            |            |            |
| H | 4.7721059  | 7.4469107  | 83.4400972 |    |            |            |            |
| H | 0.2681674  | 0.7355985  | 82.6621923 |    |            |            |            |
| C | 4.2518281  | 4.1011177  | 84.3623433 |    |            |            |            |
| C | 5.5654138  | 2.7440621  | 88.3544473 |    |            |            |            |
| C | 4.3663746  | 6.6302112  | 84.0725834 |    |            |            |            |
| H | 4.6982210  | 6.8260470  | 85.1139028 |    |            |            |            |
| C | 4.3864801  | 4.0278235  | 85.7595499 |    |            |            |            |
| C | 3.0177351  | 0.3330592  | 82.4601951 |    |            |            |            |
| H | 6.7417474  | 4.2084987  | 83.1646235 |    |            |            |            |
| C | 3.5692330  | 3.0582850  | 83.7188056 |    |            |            |            |
| C | 6.3893443  | 5.1810650  | 83.5628848 |    |            |            |            |
| H | 6.8264469  | 5.9892179  | 82.9398613 |    |            |            |            |
| H | 3.4441400  | 3.1067466  | 82.6248627 |    |            |            |            |
| C | 3.5307553  | 4.2376515  | 88.6952739 |    |            |            |            |

### 14*ν*-ma; COSMO

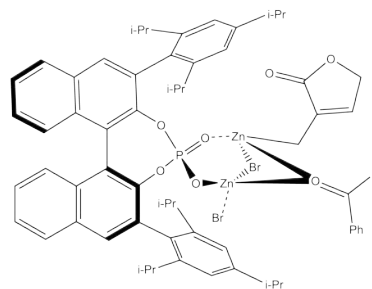

Energy (Hartree) = -11970.04710490

|   |            |            |            |
|---|------------|------------|------------|
| C | -0.7767753 | 0.7426324  | 89.4200913 |
| C | 0.1814944  | -0.1932367 | 89.8256237 |
| C | -0.0136388 | -0.8440215 | 91.1020947 |
| C | 0.9777961  | -1.6708260 | 91.7118197 |
| C | -1.2500953 | -0.6293385 | 91.8169976 |
| C | -1.4753426 | -1.3148532 | 93.0487980 |
| C | -2.1862841 | 0.3294270  | 91.3327643 |

|   |            |            |            |    |            |            |            |
|---|------------|------------|------------|----|------------|------------|------------|
| H | -3.0902577 | 0.5341939  | 91.9262494 | H  | 6.4716376  | 6.9899373  | 84.9317743 |
| C | -1.9333414 | 1.0771228  | 90.1903838 | H  | 1.4638164  | 0.3741288  | 83.2596488 |
| C | 3.2911944  | 0.4673087  | 87.6628415 | C  | 5.0436995  | 3.8386314  | 85.5504721 |
| C | 3.7530256  | -0.8284627 | 87.4574033 | C  | 6.2247729  | 2.4229088  | 89.5644849 |
| H | 4.6754088  | -0.9816657 | 86.8768040 | C  | 6.1282751  | 6.1693312  | 85.5923127 |
| C | 3.0206449  | -1.9693119 | 87.8909780 | H  | 6.9672634  | 5.9131989  | 86.2734092 |
| C | 3.4576147  | -3.2899611 | 87.5689535 | C  | 5.1382065  | 3.7395728  | 86.9477636 |
| C | 1.7765612  | -1.7883606 | 88.5994578 | C  | 4.1025057  | -0.1868711 | 83.9104159 |
| C | 0.9853434  | -2.9449799 | 88.8733309 | H  | 6.5575522  | 3.5929917  | 83.2530691 |
| C | 1.3724536  | -0.4517298 | 88.9697477 | C  | 4.3408116  | 2.8221888  | 84.8740904 |
| C | 2.1238860  | 0.6233250  | 88.4735196 | C  | 6.8699827  | 4.4255346  | 83.9152035 |
| O | -0.6369119 | 1.3846594  | 88.1940716 | H  | 7.3000864  | 5.2259257  | 83.2780099 |
| O | 1.7566530  | 1.9244210  | 88.8078997 | H  | 4.2433812  | 2.8880167  | 83.7771429 |
| P | 0.4621554  | 2.6044672  | 88.0589842 | C  | 4.1571659  | 3.8810043  | 89.8611833 |
| O | 0.1108331  | 3.8237073  | 88.9298767 | H  | 6.3390557  | 2.3418872  | 90.6654304 |
| O | 0.6661153  | 2.8106136  | 86.5568134 | H  | 6.6316267  | 1.4980659  | 89.1070588 |
| C | -0.5058935 | -2.1453874 | 93.5903549 | C  | 4.5730887  | 2.6677954  | 87.6670614 |
| C | 0.7380733  | -2.3047513 | 92.9235886 | C  | 1.9870295  | 1.2030044  | 83.7799333 |
| H | -2.4295130 | -1.1507342 | 93.5737579 | C  | 3.7758764  | 1.7188929  | 85.5370527 |
| H | -0.6882676 | -2.6619214 | 94.5449686 | H  | 4.8691396  | -0.6401160 | 84.5709401 |
| H | 1.9491917  | -1.7978941 | 91.2152314 | H  | 4.6360862  | 0.4476780  | 83.1716363 |
| H | 1.5230943  | -2.9315630 | 93.3734774 | C  | 4.7466058  | 2.6306097  | 89.1836668 |
| C | 1.4264128  | -4.2147892 | 88.5259646 | C  | 3.9025628  | 1.6376724  | 86.9577448 |
| C | 2.6823265  | -4.3948536 | 87.8867357 | C  | 3.0752421  | 0.6403937  | 84.7072015 |
| H | 0.0068610  | -2.8236724 | 89.3578589 | H  | 3.0868518  | 4.0063916  | 89.6060602 |
| H | 0.7931687  | -5.0885903 | 88.7429962 | H  | 1.2394536  | 1.7830068  | 84.3527058 |
| H | 3.0262406  | -5.4073770 | 87.6259702 | H  | 4.6939523  | 4.8032719  | 89.5556983 |
| H | 4.4162764  | -3.4110000 | 87.0404186 | H  | 5.2930483  | 6.5653621  | 86.2025994 |
| C | -2.4696857 | 3.4862033  | 90.6133618 | H  | 2.4125970  | 1.8602896  | 82.9938493 |
| C | -2.6967166 | 2.3140039  | 89.8336551 | H  | 7.6765449  | 4.0436245  | 84.5761219 |
| C | -3.0710998 | 4.6996105  | 90.1961766 | H  | 4.1887158  | 1.7524877  | 89.5671447 |
| C | -3.5351831 | 2.3716186  | 88.6898722 | H  | 2.5649962  | -0.0476473 | 85.4092062 |
| C | -4.1630217 | 3.5872966  | 88.3502742 | H  | 5.6708381  | 4.5215300  | 87.5079742 |
| C | -3.9501331 | 4.7668335  | 89.0801005 | Zn | -1.2331176 | 5.2791706  | 88.7093030 |
| H | -2.9458843 | 5.5971119  | 90.8222657 | Br | -0.8405956 | 7.4283870  | 89.5914608 |
| C | -3.7813535 | 1.1446862  | 87.8196907 | C  | 2.6513601  | 4.2114177  | 79.0965419 |
| H | -4.8195609 | 3.6125274  | 87.4696037 | C  | 1.8123025  | 4.8136691  | 83.2244031 |
| C | -3.3935829 | 1.3959759  | 86.3511894 | C  | 1.5762019  | 3.5134820  | 79.6849423 |
| H | -4.0448945 | 2.1613033  | 85.8804304 | C  | 3.1375237  | 5.3021489  | 81.2093069 |
| H | -3.4984617 | 0.4615096  | 85.7626188 | C  | 2.0633136  | 4.5971702  | 81.8048494 |
| H | -2.3457453 | 1.7436272  | 86.2681209 | C  | 3.4281306  | 5.1068172  | 79.8533947 |
| C | -5.2387962 | 0.6642582  | 87.9523704 | C  | 1.2767887  | 3.7054885  | 81.0358787 |
| H | -3.1318068 | 0.3307902  | 88.2021487 | O  | 0.8540355  | 4.3111842  | 83.8473345 |
| H | -5.9523211 | 1.4309535  | 87.5842018 | H  | 2.8829196  | 4.0549546  | 78.0314853 |
| H | -5.4967677 | 0.4417925  | 89.0076990 | H  | 3.7155788  | 6.0135021  | 81.8215218 |
| H | -5.3997746 | -0.2576331 | 87.3566758 | H  | 0.9758229  | 2.8182785  | 79.0790210 |
| C | -4.6458731 | 6.0872861  | 88.7703562 | H  | 4.2588518  | 5.6528157  | 79.3820768 |
| C | -5.2578825 | 6.1640778  | 87.3678180 | H  | 0.4460652  | 3.1731580  | 81.5229145 |
| H | -5.6529825 | 7.1826088  | 87.1818367 | Br | -1.6695051 | 5.2688327  | 86.2770583 |
| H | -6.1063613 | 5.4574299  | 87.2518033 | Zn | 0.8159704  | 4.7102100  | 85.8916852 |
| H | -4.5094519 | 5.9398758  | 86.5821203 | H  | 0.1648026  | 9.8097407  | 84.8550069 |
| C | -5.7059328 | 6.3885724  | 89.8504209 | H  | 1.8730744  | 6.1194940  | 87.7001788 |
| H | -3.8599104 | 6.8739595  | 88.8472271 | C  | 0.9628691  | 8.4467520  | 86.3708413 |
| H | -6.1683751 | 7.3809910  | 89.6737675 | C  | 1.1004212  | 9.5863214  | 85.4169269 |
| H | -5.2692472 | 6.3935739  | 90.8690441 | H  | 0.2664703  | 8.4396368  | 87.2223914 |
| H | -6.5121427 | 5.6255393  | 89.8302859 | C  | 1.8197876  | 7.4463655  | 86.0185865 |
| C | -1.6633054 | 3.4664446  | 91.9108183 | C  | 2.0589324  | 6.1149040  | 86.6068382 |
| C | -0.6584368 | 4.6184335  | 92.0597347 | C  | 2.5418097  | 7.9247597  | 84.8029183 |
| H | -0.0972096 | 4.4988866  | 93.0086471 | O  | 2.1072747  | 9.1803946  | 84.4765446 |
| H | -1.1455638 | 5.6139969  | 92.0889392 | O  | 3.3930158  | 7.3559410  | 84.1286235 |
| H | 0.0743758  | 4.6224286  | 91.2300382 | H  | 1.4283203  | 10.5342338 | 85.9010500 |
| C | -2.6347668 | 3.4295459  | 93.1093852 | H  | 3.0947845  | 5.7663754  | 86.4215202 |
| H | -1.0776521 | 2.5267165  | 91.9242665 | H  | 2.5388413  | 5.4801980  | 83.7512481 |
| H | -2.0723150 | 3.3350538  | 94.0607562 |    |            |            |            |
| H | -3.3439677 | 2.5802822  | 93.0432401 |    |            |            |            |
| H | -3.2344017 | 4.3625301  | 93.1596481 |    |            |            |            |
| H | 4.9181915  | 5.3357091  | 84.0440234 |    |            |            |            |
| H | 6.8537787  | 3.2716434  | 89.2231514 |    |            |            |            |
| H | 3.6018565  | -1.0063199 | 83.3538320 |    |            |            |            |
| C | 5.6920343  | 4.9655991  | 84.7511087 |    |            |            |            |
| H | 4.2390795  | 3.7999317  | 90.9648460 |    |            |            |            |

14/-ma

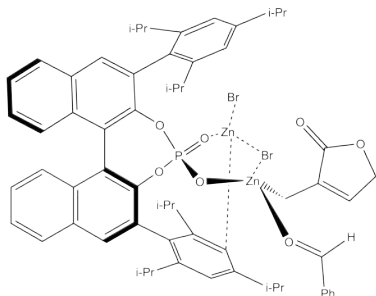

Energy (Hartree) = -11970.03547989

|   |            |            |            |
|---|------------|------------|------------|
| C | -0.7832006 | 0.7377451  | 89.4241030 |
| C | 0.1774539  | -0.1954729 | 89.8306204 |
| C | -0.0121874 | -0.8408999 | 91.1105368 |
| C | 0.9817350  | -1.6649784 | 91.7194741 |
| C | -1.2453068 | -0.6236199 | 91.8300647 |
| C | -1.4643044 | -1.3043054 | 93.0651293 |
| C | -2.1829215 | 0.3331428  | 91.3455166 |
| H | -3.0835668 | 0.5429529  | 91.9424766 |
| C | -1.9361106 | 1.0758540  | 90.1987625 |
| C | 3.2812159  | 0.4636833  | 87.6593530 |
| C | 3.7449187  | -0.8319116 | 87.4584230 |
| H | 4.6670858  | -0.9838053 | 86.8771431 |
| C | 3.0162115  | -1.9728109 | 87.8969722 |
| C | 3.4550200  | -3.2936283 | 87.5802756 |
| C | 1.7734265  | -1.7917641 | 88.6072665 |
| C | 0.9861280  | -2.9490868 | 88.8881336 |
| C | 1.3667374  | -0.4547707 | 88.9727500 |
| C | 2.1141679  | 0.6204894  | 88.4705581 |
| O | -0.6497036 | 1.3731060  | 88.1953658 |
| O | 1.7438653  | 1.9212552  | 88.7984586 |
| P | 0.4465833  | 2.5941678  | 88.0469065 |
| O | 0.0944795  | 3.8192764  | 88.9085976 |
| O | 0.6488301  | 2.7881421  | 86.5430377 |
| C | -0.4931456 | -2.1326820 | 93.6055840 |
| C | 0.7472925  | -2.2944623 | 92.9340921 |
| H | -2.4160607 | -1.1378309 | 93.5937704 |
| H | -0.6715466 | -2.6454145 | 94.5629393 |
| H | 1.9504240  | -1.7934335 | 91.2182366 |
| H | 1.5343973  | -2.9195833 | 93.3825622 |
| C | 1.4297093  | -4.2190081 | 88.5461701 |
| C | 2.6839669  | -4.3988249 | 87.9049177 |
| H | 0.0089520  | -2.8268828 | 89.3748600 |
| H | 0.7992614  | -5.0932675 | 88.7691608 |
| H | 3.0301073  | -5.4115237 | 87.6480330 |
| H | 4.4126755  | -3.4144203 | 87.0498640 |
| C | -2.4734960 | 3.4849987  | 90.6195591 |
| C | -2.7008290 | 2.3116167  | 89.8417729 |
| C | -3.0772688 | 4.6958168  | 90.2027745 |
| C | -3.5390738 | 2.3674354  | 88.6978288 |
| C | -4.1653806 | 3.5828359  | 88.3565819 |
| C | -3.9530243 | 4.7631004  | 89.0858217 |
| H | -2.9415226 | 5.5975831  | 90.8201551 |
| C | -3.7873912 | 1.1384311  | 87.8305140 |
| H | -4.8195822 | 3.6080622  | 87.4742174 |
| C | -3.4054299 | 1.3847039  | 86.3599040 |
| H | -4.0558938 | 2.1505374  | 85.8889197 |
| H | -3.5149512 | 0.4493086  | 85.7736852 |
| H | -2.3572345 | 1.7288221  | 86.2703169 |
| C | -5.2437013 | 0.6570386  | 87.9707170 |
| H | -3.1357060 | 0.3260433  | 88.2126505 |
| H | -5.9597186 | 1.4224928  | 87.6049364 |
| H | -5.4973585 | 0.4370536  | 89.0275149 |
| H | -5.4083735 | -0.2660199 | 87.3777941 |
| C | -4.6446882 | 6.0850623  | 88.7718199 |
| C | -5.2579722 | 6.1588340  | 87.3697604 |
| H | -5.6500539 | 7.1777915  | 87.1797425 |

|    |            |            |            |
|----|------------|------------|------------|
| H  | -6.1095827 | 5.4552544  | 87.2567771 |
| H  | -4.5110570 | 5.9302644  | 86.5840688 |
| C  | -5.7020263 | 6.3958559  | 89.8514098 |
| H  | -3.8548086 | 6.8683856  | 88.8438893 |
| H  | -6.1607948 | 7.3895847  | 89.6723933 |
| H  | -5.2644319 | 6.4030545  | 90.8695084 |
| H  | -6.5119905 | 5.6366770  | 89.8366098 |
| C  | -1.6588185 | 3.4706504  | 91.9124044 |
| C  | -0.6420547 | 4.6148832  | 92.0414005 |
| H  | -0.0764131 | 4.5028085  | 92.9886541 |
| H  | -1.1173075 | 5.6163529  | 92.0586656 |
| H  | 0.0861815  | 4.6011162  | 91.2080691 |
| C  | -2.6210401 | 3.4535975  | 93.1184577 |
| H  | -1.0814956 | 2.5258766  | 91.9315413 |
| H  | -2.0534720 | 3.3647320  | 94.0673628 |
| H  | -3.3375915 | 2.6093800  | 93.0663164 |
| H  | -3.2140111 | 4.3910137  | 93.1643027 |
| H  | 4.9167884  | 5.3177540  | 84.0251439 |
| H  | 6.8380307  | 3.2724336  | 89.2179218 |
| H  | 3.6079454  | -1.0205037 | 83.3523926 |
| C  | 5.6853074  | 4.9560409  | 84.7422896 |
| H  | 4.2189953  | 3.8047050  | 90.9550091 |
| H  | 6.4456811  | 6.9884894  | 84.9177886 |
| H  | 1.4663464  | 0.3544735  | 83.2506597 |
| C  | 5.0355868  | 3.8304186  | 85.5422559 |
| C  | 6.2082085  | 2.4250529  | 89.5607290 |
| C  | 6.1063828  | 6.1676506  | 85.5798308 |
| H  | 6.9438056  | 5.9222105  | 86.2667647 |
| C  | 5.1262643  | 3.7348573  | 86.9397192 |
| C  | 4.1043493  | -0.1979514 | 83.9081384 |
| H  | 6.5737277  | 3.5771887  | 83.2633661 |
| C  | 4.3356973  | 2.8117157  | 84.8668368 |
| C  | 6.8744452  | 4.4164908  | 83.9222913 |
| H  | 7.3079180  | 5.2143718  | 83.2842532 |
| H  | 4.2412510  | 2.8751362  | 83.7693956 |
| C  | 4.1389569  | 3.8827072  | 89.8511049 |
| H  | 6.3216906  | 2.3471221  | 90.6619348 |
| H  | 6.6161353  | 1.4995686  | 89.1059893 |
| C  | 4.5603223  | 2.6648611  | 87.6602795 |
| C  | 1.9853301  | 1.1856778  | 83.7714628 |
| C  | 3.7701087  | 1.7095924  | 85.5307961 |
| H  | 4.8719789  | -0.6467652 | 84.5703836 |
| H  | 4.6381122  | 0.4360065  | 83.1691375 |
| C  | 4.7306627  | 2.6315629  | 89.1773468 |
| C  | 3.8923531  | 1.6325446  | 86.9518901 |
| C  | 3.0735775  | 0.6278938  | 84.7015728 |
| H  | 3.0688844  | 4.0065982  | 89.5950718 |
| H  | 1.2332633  | 1.7622601  | 84.3416132 |
| H  | 4.6743227  | 4.8054581  | 89.5448792 |
| H  | 5.2643283  | 6.5597751  | 86.1829004 |
| H  | 2.4104196  | 1.8438488  | 82.9856709 |
| H  | 7.6756766  | 4.0425877  | 84.5938608 |
| H  | 4.1725327  | 1.7540727  | 89.5618584 |
| H  | 2.5635535  | -0.0602522 | 85.4036308 |
| H  | 5.6565894  | 4.5189787  | 87.4989301 |
| Zn | -1.2249607 | 5.2944969  | 88.6720799 |
| Br | -0.8761458 | 7.4304228  | 89.5767552 |
| C  | 2.6934632  | 4.2862113  | 79.0892900 |
| C  | 1.8083090  | 4.8070267  | 83.2197865 |
| C  | 1.6392421  | 3.5452447  | 79.6614317 |
| C  | 3.1306268  | 5.3644477  | 81.2195932 |
| C  | 2.0772175  | 4.6159352  | 81.7976683 |
| C  | 3.4343860  | 5.1968624  | 79.8626912 |
| C  | 1.3251143  | 3.7100192  | 81.0125931 |
| O  | 0.8490191  | 4.2848214  | 83.8219266 |
| H  | 2.9366290  | 4.1516722  | 78.0237511 |
| H  | 3.6768267  | 6.0878582  | 81.8472622 |
| H  | 1.0664776  | 2.8380698  | 79.0426207 |
| H  | 4.2482538  | 5.7774656  | 79.4032923 |
| H  | 0.5102494  | 3.1458824  | 81.4906548 |
| Br | -1.6903279 | 5.2455596  | 86.2489495 |



|    |           |            |            |
|----|-----------|------------|------------|
| Zn | 0.7875789 | 4.6879056  | 85.8724650 |
| H  | 0.1869610 | 9.8206023  | 84.8872015 |
| H  | 1.8689500 | 6.0823964  | 87.6794126 |
| C  | 0.9781624 | 8.4295749  | 86.3820848 |
| C  | 1.1250784 | 9.5764559  | 85.4372972 |
| H  | 0.2899182 | 8.4219795  | 87.2405787 |
| C  | 1.8184197 | 7.4226414  | 86.0106697 |
| C  | 2.0453505 | 6.0829021  | 86.5844343 |
| C  | 2.5361862 | 7.9047320  | 84.7923637 |
| O  | 2.1153599 | 9.1690842  | 84.4835570 |
| O  | 3.3713910 | 7.3291449  | 84.1048140 |
| H  | 1.4703203 | 10.5150596 | 85.9287217 |
| H  | 3.0769227 | 5.7260732  | 86.3911802 |
| H  | 2.5220710 | 5.4748338  | 83.7626190 |

### 14 $\pi$ -ma

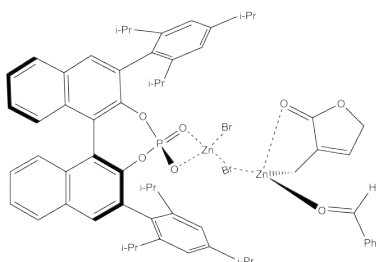

Energy (Hartree) = -11969.99715727

|   |            |            |            |
|---|------------|------------|------------|
| C | 1.5677664  | 2.4528946  | 1.2424179  |
| C | 2.9242825  | 2.6009998  | 0.9221142  |
| C | 3.4021042  | 3.9300821  | 0.6236677  |
| C | 4.7114906  | 4.1856082  | 0.1153876  |
| C | 2.5122594  | 5.0522523  | 0.8064485  |
| C | 2.9925208  | 6.3718342  | 0.5510850  |
| C | 1.1580794  | 4.8238998  | 1.1833312  |
| H | 0.4865691  | 5.6881189  | 1.2990623  |
| C | 0.6475895  | 3.5418778  | 1.3480292  |
| C | 4.1019428  | -0.9458105 | 0.0355605  |
| C | 5.3583692  | -0.9793379 | 0.6290918  |
| H | 5.9594661  | -1.8990794 | 0.5593338  |
| C | 5.8551224  | 0.1077465  | 1.4051176  |
| C | 7.1094856  | 0.0151315  | 2.0796126  |
| C | 5.0455048  | 1.2911086  | 1.5820798  |
| C | 5.5021165  | 2.2874994  | 2.4965151  |
| C | 3.8005906  | 1.3966629  | 0.8583844  |
| C | 3.3805005  | 0.2870005  | 0.1164305  |
| O | 1.0576072  | 1.1826691  | 1.4987743  |
| O | 2.1945546  | 0.3709227  | -0.5990526 |
| P | 0.7682766  | 0.2119908  | 0.2027467  |
| O | -0.3436058 | 0.6917131  | -0.7499831 |
| O | 0.4613612  | -1.2099425 | 0.7086427  |
| C | 4.2832729  | 6.5866825  | 0.0932881  |
| C | 5.1411795  | 5.4798322  | -0.1424981 |
| H | 2.3056075  | 7.2185603  | 0.7075019  |
| H | 4.6377248  | 7.6094529  | -0.1063446 |
| H | 5.3820739  | 3.3380371  | -0.0815782 |
| H | 6.1540612  | 5.6475585  | -0.5394069 |
| C | 6.7190489  | 2.1575457  | 3.1517071  |
| C | 7.5414961  | 1.0216678  | 2.9296443  |
| H | 4.8722931  | 3.1672111  | 2.6866073  |
| H | 7.0446661  | 2.9400768  | 3.8540782  |
| H | 8.5085376  | 0.9328739  | 3.4477950  |
| H | 7.7207482  | -0.8881097 | 1.9255012  |
| C | -1.7317480 | 3.5070849  | 0.5025166  |
| C | -0.8111046 | 3.2780074  | 1.5651620  |
| C | -3.0973465 | 3.2524380  | 0.7317294  |
| C | -1.2747377 | 2.7686366  | 2.8098889  |
| C | -2.6502161 | 2.5388226  | 2.9830924  |

|   |            |            |            |
|---|------------|------------|------------|
| C | -3.5831793 | 2.7811375  | 1.9607127  |
| H | -3.8108811 | 3.4211717  | -0.0906560 |
| C | -0.3304474 | 2.4826346  | 3.9755708  |
| H | -3.0031260 | 2.1562997  | 3.9541958  |
| C | -0.4037072 | 1.0105161  | 4.4200439  |
| H | -1.3987707 | 0.7609387  | 4.8443924  |
| H | 0.3528843  | 0.8023558  | 5.2046270  |
| H | -0.2131992 | 0.3295176  | 3.5680815  |
| C | -0.5870859 | 3.4468928  | 5.1484363  |
| H | 0.7052356  | 2.6699108  | 3.6271406  |
| H | -1.6086973 | 3.3177238  | 5.5636194  |
| H | -0.4867891 | 4.5041562  | 4.8291945  |
| H | 0.1343628  | 3.2659196  | 5.9721112  |
| C | -5.0734996 | 2.5578897  | 2.1835163  |
| C | -5.3953892 | 1.1043992  | 2.5661018  |
| H | -6.4909555 | 0.9524989  | 2.6618969  |
| H | -4.9329837 | 0.8278854  | 3.5362061  |
| H | -5.0138897 | 0.3943070  | 1.8067779  |
| C | -5.6410860 | 3.5497731  | 3.2149072  |
| H | -5.5764725 | 2.7614440  | 1.2120509  |
| H | -6.7381136 | 3.4230559  | 3.3298796  |
| H | -5.4417201 | 4.5989396  | 2.9172326  |
| H | -5.1798695 | 3.3937596  | 4.2123490  |
| C | -1.2989529 | 4.0304927  | -0.8677686 |
| C | -1.8888071 | 3.2258159  | -2.0389425 |
| H | -1.4685240 | 3.5940554  | -2.9976381 |
| H | -2.9913976 | 3.3222622  | -2.1093965 |
| H | -1.6392514 | 2.1532558  | -1.9421222 |
| C | -1.6381127 | 5.5274376  | -1.0092934 |
| H | -0.1968645 | 3.9263555  | -0.9299820 |
| H | -1.2811860 | 5.9220411  | -1.9832823 |
| H | -1.1797753 | 6.1371106  | -0.2049253 |
| H | -2.7360546 | 5.6890533  | -0.9608143 |
| H | 1.5884995  | -6.4864133 | -1.5775992 |
| H | 4.1733298  | -2.6267803 | -4.4329683 |
| H | 4.6652512  | -4.0726047 | 3.3653872  |
| C | 1.0318943  | -5.5669495 | -1.8752205 |
| H | 2.6533580  | 0.1952092  | -4.3678705 |
| H | -0.8978686 | -6.4768275 | -1.3531664 |
| H | 2.2820875  | -3.1726968 | 3.8122097  |
| C | 1.9028571  | -4.3846686 | -1.4485856 |
| C | 4.5684861  | -1.7758355 | -3.8390986 |
| C | -0.3043762 | -5.5733958 | -1.1019339 |
| H | -0.9092031 | -4.6821620 | -1.3677418 |
| C | 2.2946945  | -3.3550020 | -2.3192016 |
| C | 4.4356687  | -4.1388098 | 2.2813860  |
| H | 1.7138815  | -5.6811311 | -3.9682140 |
| C | 2.3139754  | -4.2881539 | -0.1075328 |
| C | 0.7718409  | -5.6479663 | -3.3842716 |
| H | 0.1885905  | -6.5596293 | -3.6270147 |
| H | 2.0229023  | -5.0870534 | 0.5932938  |
| C | 2.3051534  | -0.6199596 | -3.7002045 |
| H | 4.9261583  | -1.0038060 | -4.5520393 |
| H | 5.4418677  | -2.1464877 | -3.2648037 |
| C | 3.0528265  | -2.2507738 | -1.8830824 |
| C | 2.0609609  | -3.3513647 | 2.7393357  |
| C | 3.0379274  | -3.1937851 | 0.3906595  |
| H | 5.3738987  | -3.9520335 | 1.7202389  |
| H | 4.1243955  | -5.1826039 | 2.0651233  |
| C | 3.4862990  | -1.2013041 | -2.9046439 |
| C | 3.4219660  | -2.1601562 | -0.5152389 |
| C | 3.3295694  | -3.1412371 | 1.8915915  |
| H | 1.5296497  | -0.2069391 | -3.0272871 |
| H | 1.2609693  | -2.6567080 | 2.4178393  |
| H | 1.8206809  | -1.3870451 | -4.3391577 |
| H | -0.1498983 | -5.5606256 | -0.0048555 |
| H | 1.6725742  | -4.3881771 | 2.6545785  |
| H | 0.1783112  | -4.7772086 | -3.7325205 |
| H | 3.9537691  | -0.3635739 | -2.3474760 |
| H | 3.7015656  | -2.1245148 | 2.1276632  |
| H | 1.9953208  | -3.3953715 | -3.3757027 |

|    |            |            |            |   |            |            |            |
|----|------------|------------|------------|---|------------|------------|------------|
| Zn | -1.1736023 | -1.2369432 | -0.6475252 | H | -2.2652464 | -1.2696512 | 93.0452089 |
| Br | -1.3101242 | -2.1584130 | -2.7890097 | H | -0.4492938 | -2.6327161 | 94.0896644 |
| H  | -6.9812659 | 3.1127334  | -2.6040076 | H | 2.2593408  | -1.5056127 | 90.8972176 |
| Br | -2.8803880 | -1.6246014 | 1.0886922  | H | 1.8296828  | -2.7024369 | 93.0245377 |
| H  | -7.2722416 | -1.4475640 | -1.0234772 | C | 1.8650122  | -3.8883798 | 88.1197229 |
| Zn | -4.8495172 | -1.5955451 | -0.3331843 | C | 3.1751682  | -4.0325885 | 87.5929169 |
| C  | -7.1436650 | 1.7377426  | -0.9040575 | H | 0.3487995  | -2.5448887 | 88.8475147 |
| C  | -6.3924943 | 2.7246511  | -1.7435213 | H | 1.2270358  | -4.7758405 | 88.2495273 |
| C  | -6.4977615 | 0.5413808  | -0.9279042 | H | 3.5577990  | -5.0314710 | 87.3339739 |
| C  | -6.6983707 | -0.7987254 | -0.3233646 | H | 4.9594519  | -2.9954596 | 86.9357768 |
| C  | -5.2766169 | 0.7584971  | -1.7503338 | C | -2.7351255 | 3.3601583  | 89.9233720 |
| O  | -5.2494789 | 2.0084430  | -2.2528536 | C | -2.6740318 | 2.1435785  | 89.1819970 |
| O  | -4.3650001 | -0.0574281 | -1.9274453 | C | -3.1652323 | 4.5355956  | 89.2535763 |
| H  | -6.0110312 | 3.6013331  | -1.1730410 | C | -3.1491883 | 2.1106480  | 87.8385110 |
| H  | -7.2554905 | -0.7576276 | 0.6309714  | C | -3.5964993 | 3.2947461  | 87.2210827 |
| H  | -8.0751597 | 1.9827764  | -0.3752812 | C | -3.5968461 | 4.5256051  | 87.8989009 |
| C  | -3.3287590 | -6.9674776 | -3.2264647 | H | -3.2734004 | 5.4724330  | 89.8235938 |
| C  | -3.7172463 | -5.7961497 | -2.5696972 | C | -3.2014124 | 0.8038322  | 87.0549219 |
| C  | -3.7495220 | -4.5723396 | -3.2760756 | H | -3.9320986 | 3.2592461  | 86.1732131 |
| C  | -3.3895100 | -4.5348127 | -4.6422651 | C | -2.5229985 | 0.9040524  | 85.6790279 |
| C  | -2.9976184 | -5.7087440 | -5.2939851 | H | -3.0681356 | 1.5720322  | 84.9841685 |
| C  | -2.9666065 | -6.9239295 | -4.5858509 | H | -2.4498201 | -0.0996709 | 85.2135739 |
| H  | -3.2958981 | -7.9213771 | -2.6788226 | H | -1.4913852 | 1.2921041  | 85.8115571 |
| H  | -3.9885067 | -5.7971067 | -1.5037446 | C | -4.6627376 | 0.3306498  | 86.9248709 |
| C  | -4.1345935 | -3.3330512 | -2.5978201 | H | -2.6594955 | 0.0358694  | 87.6437790 |
| H  | -3.3947197 | -3.5719263 | -5.1769295 | H | -5.2672550 | 1.0581130  | 86.3443619 |
| H  | -2.7054214 | -5.6805524 | -6.3542450 | H | -5.1391840 | 0.2089016  | 87.9186489 |
| H  | -2.6510102 | -7.8462347 | -5.0975561 | H | -4.7083615 | -0.6440583 | 86.3975411 |
| O  | -4.4774506 | -3.3071054 | -1.3961350 | C | -4.1379277 | 5.7979857  | 87.2650661 |
| H  | -4.1692876 | -2.4012659 | -3.2102553 | C | -3.4982600 | 6.1009524  | 85.9034619 |

### 14θ-ma

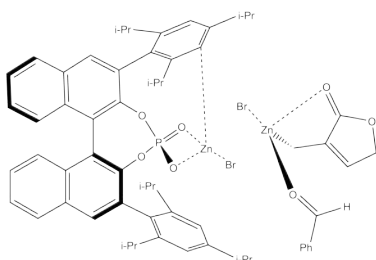

Energy (Hartree) = -11969.98357873

|   |            |            |            |   |           |           |            |
|---|------------|------------|------------|---|-----------|-----------|------------|
| C | -0.5854328 | 0.8197784  | 89.0276921 | H | 3.9297885 | 3.7897699 | 91.3445221 |
| C | 0.4401704  | -0.0135405 | 89.4576926 | H | 6.7790041 | 7.7591585 | 86.0165955 |
| C | 0.2357683  | -0.7124062 | 90.7081282 | H | 3.5897229 | 0.8810245 | 82.6941848 |
| C | 1.2610482  | -1.4646613 | 91.3534792 | C | 5.8682640 | 4.3730922 | 86.2415391 |
| C | -1.0529204 | -0.6183074 | 91.3567870 | C | 6.1048598 | 2.5122317 | 90.1911581 |
| C | -1.2746613 | -1.3383136 | 92.5685711 | C | 6.2687690 | 6.8908020 | 86.4815527 |
| C | -2.0661388 | 0.2365769  | 90.8250667 | H | 6.5668103 | 6.8755777 | 87.5502863 |
| H | -3.0237908 | 0.3133647  | 91.3609453 | C | 5.5719541 | 4.1649976 | 87.5981412 |
| C | -1.8369566 | 1.0117317  | 89.6979931 | C | 5.7695119 | 0.3757967 | 84.2969772 |
| C | 3.7078155  | 0.8383532  | 87.5555037 | H | 8.4669182 | 4.4097380 | 85.3303476 |
| C | 4.2210233  | -0.4416432 | 87.3925983 | C | 5.4801980 | 3.3772926 | 85.3298133 |
| H | 5.2299094  | -0.5620594 | 86.9725178 | C | 8.1727028 | 5.3212183 | 85.8881850 |
| C | 3.4641942  | -1.6052916 | 87.6929084 | H | 8.7633897 | 6.1750773 | 85.4953837 |
| C | 3.9550522  | -2.9071795 | 87.3787376 | H | 5.7319881 | 3.5136787 | 84.2647834 |
| C | 2.1607760  | -1.4595705 | 88.2853685 | C | 4.0419846 | 4.0003003 | 90.2609863 |
| C | 1.3722943  | -2.6363111 | 88.4599085 | H | 5.9992284 | 2.3004913 | 91.2755493 |
| C | 1.6834122  | -0.1401455 | 88.6414872 | H | 6.5788641 | 1.6311883 | 89.7127781 |
| C | 2.4177318  | 0.9641693  | 88.1719278 | C | 4.8915103 | 3.0210057 | 88.0500189 |
| O | -0.3670369 | 1.5858644  | 87.8875274 | C | 3.8334529 | 1.7130893 | 83.3861415 |
| O | 2.0155144  | 2.2856905  | 88.3672273 |   |           |           |            |
| P | 0.5290443  | 2.9260025  | 88.2123595 |   |           |           |            |
| O | 0.1594383  | 3.6067957  | 89.5572849 |   |           |           |            |
| O | 0.2574366  | 3.9358380  | 87.0807602 |   |           |           |            |
| C | -0.2644671 | -2.0886981 | 93.1509766 |   |           |           |            |
| C | 1.0180225  | -2.1342759 | 92.5451503 |   |           |           |            |

|    |            |            |            |   |            |            |            |
|----|------------|------------|------------|---|------------|------------|------------|
| C  | 4.7927528  | 2.2119854  | 85.7210217 | H | 4.8102058  | -2.1771116 | 0.7814700  |
| H  | 6.2637291  | -0.0581051 | 85.1894056 | C | 4.7493382  | -0.2235688 | 1.7488467  |
| H  | 6.5112570  | 1.0416720  | 83.8072209 | C | 5.7598689  | -0.5368608 | 2.7067254  |
| C  | 4.7330994  | 2.8202382  | 89.5579824 | C | 4.1082373  | 1.0703132  | 1.7976912  |
| C  | 4.4707008  | 2.0440515  | 87.1022280 | C | 4.4646926  | 1.9580416  | 2.8571898  |
| C  | 4.4872263  | 1.1524817  | 84.6590009 | C | 3.1132945  | 1.3939415  | 0.8014752  |
| H  | 3.0307985  | 4.1821110  | 89.8493167 | C | 2.7322677  | 0.3820353  | -0.0845886 |
| H  | 2.8882047  | 2.2349220  | 83.6236401 | O | 0.2987130  | 1.6307365  | 0.7729381  |
| H  | 4.6278963  | 4.9383516  | 90.1684550 | O | 1.7770275  | 0.6607063  | -1.0556829 |
| H  | 5.1749945  | 7.0673965  | 86.4438078 | P | 0.2063390  | 0.8158035  | -0.6479110 |
| H  | 4.5001379  | 2.4125392  | 82.8386503 | O | -0.4021505 | 1.6502877  | -1.7936406 |
| H  | 8.4572604  | 5.1686919  | 86.9503695 | O | -0.4888255 | -0.5143921 | -0.3385572 |
| H  | 4.1023091  | 1.9246644  | 89.7227760 | C | 4.5589266  | 6.4527041  | 0.5463225  |
| H  | 3.7578717  | 0.4358068  | 85.0866940 | C | 5.2585357  | 5.2284899  | 0.3786726  |
| H  | 5.8946309  | 4.9110738  | 88.3402904 | H | 2.6303005  | 7.3859882  | 0.8560563  |
| Zn | -0.9054884 | 5.0704389  | 88.5775493 | H | 5.1044568  | 7.4075563  | 0.5021034  |
| Br | -0.8371572 | 7.3721778  | 88.5310616 | H | 5.1350723  | 3.0754145  | 0.3026960  |
| C  | 2.3982933  | 7.6845428  | 84.5579601 | H | 6.3430992  | 5.2395482  | 0.1915282  |
| C  | 0.2987672  | 3.9697326  | 84.5755127 | C | 5.4387400  | 1.6141791  | 3.7843943  |
| C  | 3.1073109  | 6.4860391  | 84.3448663 | C | 6.1066958  | 0.3641037  | 3.7015897  |
| C  | 0.3278873  | 6.4385059  | 84.7618158 | H | 3.9505459  | 2.9250091  | 2.9414647  |
| C  | 1.0359594  | 5.2340869  | 84.5533086 | H | 5.6901588  | 2.3161486  | 4.5940269  |
| C  | 1.0090672  | 7.6616024  | 84.7686725 | H | 6.8837426  | 0.1059401  | 4.4370289  |
| C  | 2.4339649  | 5.2618292  | 84.3482315 | H | 6.2482769  | -1.5223225 | 2.6489320  |
| O  | 0.8162613  | 2.8674060  | 84.3207084 | C | -2.0529079 | 4.1507045  | -0.0048101 |
| H  | 2.9384090  | 8.6440032  | 84.5695981 | C | -1.1742344 | 3.9319444  | 1.0920194  |
| H  | -0.7595556 | 6.4049174  | 84.9245392 | C | -3.4268917 | 3.9092834  | 0.1789451  |
| H  | 4.1958606  | 6.5094668  | 84.1893936 | C | -1.6893076 | 3.5009638  | 2.3453722  |
| H  | 0.4579486  | 8.5951003  | 84.9547206 | C | -3.0692884 | 3.2610967  | 2.4680762  |
| H  | 2.9775854  | 4.3163808  | 84.2146384 | C | -3.9563158 | 3.4415765  | 1.3936731  |
| Br | 0.9449922  | -0.6384520 | 84.8228019 | H | -4.1180914 | 4.0577760  | -0.6645539 |
| Zn | -0.1344287 | 1.0999322  | 83.7348728 | C | -0.7844838 | 3.2865101  | 3.5585872  |
| H  | -0.5491167 | 6.0600287  | 82.0733819 | H | -3.4612124 | 2.9089608  | 3.4357635  |
| H  | -0.9058654 | 1.1590485  | 81.3022510 | C | -0.7482396 | 1.8116944  | 3.9976005  |
| C  | -0.7752222 | 4.0030233  | 81.3550767 | H | -1.7454653 | 1.4671008  | 4.3417458  |
| C  | -1.3066731 | 5.3735431  | 81.6282521 | H | -0.0360776 | 1.6695979  | 4.8367847  |
| H  | 0.0651500  | 3.8080999  | 80.6742271 | H | -0.4347920 | 1.1572603  | 3.1610302  |
| C  | -1.4808568 | 3.0793315  | 82.0682288 | C | -1.1789642 | 4.2138979  | 4.7223744  |
| C  | -1.3427817 | 1.6226675  | 82.2095998 | H | 0.2473946  | 3.5654235  | 3.2620078  |
| C  | -2.4970764 | 3.8483664  | 82.8541647 | H | -2.1978836 | 3.9857635  | 5.0990595  |
| O  | -2.3627355 | 5.1885482  | 82.5786375 | H | -1.1683853 | 5.2778910  | 4.4106345  |
| O  | -3.3272856 | 3.4424894  | 83.6492518 | H | -0.4760588 | 4.0965377  | 5.5730462  |
| H  | -1.7229940 | 5.8777731  | 80.7260762 | C | -5.4468061 | 3.1592733  | 1.5376485  |
| H  | -2.3250331 | 1.1525629  | 82.4190796 | C | -5.7352404 | 1.7332320  | 2.0385298  |
| H  | -0.7897873 | 4.0380868  | 84.8103961 | H | -6.8281130 | 1.5482508  | 2.0813256  |

### 14ξ-ma

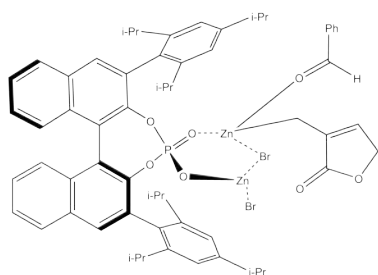

Energy (Hartree) = -11970.02178275

|   |           |            |            |   |           |            |            |
|---|-----------|------------|------------|---|-----------|------------|------------|
| C | 1.0488249 | 2.8067300  | 0.7917386  | H | 0.2285852 | -3.4457387 | 2.6198763  |
| C | 2.4446609 | 2.7270637  | 0.7493872  | C | 1.4547771 | -3.8966145 | -2.6891083 |
| C | 3.1775074 | 3.9680074  | 0.6715476  | C | 4.9145806 | -1.3302826 | -3.7089123 |
| C | 4.5850331 | 4.0166235  | 0.4418217  |   |           |            |            |
| C | 2.4600800 | 5.2151693  | 0.7976845  |   |           |            |            |
| C | 3.1869766 | 6.4419700  | 0.7468758  |   |           |            |            |
| C | 1.0432032 | 5.2049637  | 0.9595724  |   |           |            |            |
| H | 0.5187512 | 6.1606492  | 1.1101293  |   |           |            |            |
| C | 0.3128998 | 4.0246595  | 0.9242874  |   |           |            |            |
| C | 3.2915348 | -0.9321115 | -0.1016415 |   |           |            |            |
| C | 4.3291507 | -1.1870675 | 0.7867661  |   |           |            |            |

|    |            |            |            |
|----|------------|------------|------------|
| C  | 0.5680024  | -4.5367333 | -5.0081251 |
| H  | 1.5159393  | -4.3982418 | -5.5688208 |
| C  | 2.2017043  | -2.8346864 | -3.2223989 |
| C  | 2.6307628  | -4.3708323 | 1.5970244  |
| H  | 1.8303188  | -6.6176380 | -2.4842648 |
| C  | 1.3305692  | -3.9686386 | -1.2895657 |
| C  | 1.6786202  | -6.2622649 | -3.5232258 |
| H  | 1.1944387  | -7.0783707 | -4.0991504 |
| H  | 0.7319476  | -4.7869466 | -0.8558213 |
| C  | 2.7994796  | 0.0358499  | -4.0976844 |
| H  | 5.5295829  | -0.5195380 | -4.1517423 |
| H  | 5.5334513  | -1.8606534 | -2.9568563 |
| C  | 2.8195314  | -1.8679700 | -2.4082325 |
| C  | 0.2984576  | -3.3822157 | 1.5147413  |
| C  | 1.9325288  | -3.0352277 | -0.4275424 |
| H  | 3.6993582  | -4.2320968 | 1.3362968  |
| H  | 2.3058640  | -5.3345450 | 1.1514215  |
| C  | 3.6311434  | -0.7598216 | -3.0758682 |
| C  | 2.6953772  | -1.9732228 | -0.9970152 |
| C  | 1.7626276  | -3.2062278 | 1.0828428  |
| H  | 1.8808842  | 0.4467579  | -3.6366325 |
| H  | -0.3191184 | -2.5283433 | 1.1832122  |
| H  | 2.4911945  | -0.5929894 | -4.9584448 |
| H  | 0.0080307  | -3.5808686 | -5.0531429 |
| H  | -0.1598942 | -4.3053194 | 1.1036124  |
| H  | 2.6812468  | -6.0793413 | -3.9633147 |
| H  | 3.9518870  | -0.0502276 | -2.2865289 |
| H  | 2.1269139  | -2.2790606 | 1.5693924  |
| H  | 2.3097122  | -2.7446765 | -4.3128834 |
| Zn | -1.8648582 | 0.7382312  | -2.7267988 |
| Br | -1.5666427 | -0.2908472 | -4.7668420 |
| H  | -3.2447593 | -5.4418526 | 2.4317892  |
| Br | -3.7011249 | 0.4496971  | -1.2086679 |
| H  | -3.5368987 | -0.2127982 | 2.6514024  |
| Zn | -2.2810878 | -0.8224481 | 0.5518614  |
| C  | -2.9062749 | -3.4559847 | 3.2874232  |
| C  | -3.7953349 | -4.6072404 | 2.9271781  |
| C  | -3.3089581 | -2.3468106 | 2.6131035  |
| C  | -2.7603631 | -0.9872983 | 2.4856065  |
| C  | -4.4899473 | -2.7494921 | 1.7856064  |
| O  | -4.7543967 | -4.0848263 | 2.0026872  |
| O  | -5.1338545 | -2.0743954 | 1.0071335  |
| H  | -4.3338271 | -5.0435674 | 3.7999732  |
| H  | -1.9003087 | -0.8038402 | 3.1551252  |
| H  | -2.0589333 | -3.5401500 | 3.9818023  |
| C  | -3.2057128 | -6.4697366 | -2.2782512 |
| C  | -2.9569336 | -5.2732883 | -1.6022527 |
| C  | -2.6853608 | -4.0981147 | -2.3427754 |
| C  | -2.6904427 | -4.1234554 | -3.7558373 |
| C  | -2.9521532 | -5.3251927 | -4.4260195 |
| C  | -3.1997748 | -6.4952782 | -3.6881931 |
| H  | -3.4145036 | -7.3909104 | -1.7136351 |
| H  | -2.9790022 | -5.2109974 | -0.5036812 |
| C  | -2.4037488 | -2.8360813 | -1.6651846 |
| H  | -2.4856258 | -3.1933168 | -4.3112981 |
| H  | -2.9573421 | -5.3529733 | -5.5257498 |
| H  | -3.3982024 | -7.4411614 | -4.2157959 |
| O  | -2.4320347 | -2.7000558 | -0.4336483 |
| H  | -2.1621911 | -1.9681009 | -2.3294823 |

|   |            |            |            |
|---|------------|------------|------------|
| C | -0.3921451 | 1.7855143  | 88.8129462 |
| C | 0.3767577  | 0.7840615  | 89.4294515 |
| C | -0.1232312 | 0.1996622  | 90.6497919 |
| C | 0.6599617  | -0.6848441 | 91.4518898 |
| C | -1.4463475 | 0.5440611  | 91.1088924 |
| C | -1.9447106 | -0.0413468 | 92.3109831 |
| C | -2.2281409 | 1.4584356  | 90.3495137 |
| H | -3.2625197 | 1.6671736  | 90.6646072 |
| C | -1.7268544 | 2.0963024  | 89.2198916 |
| C | 3.8744109  | 1.0271571  | 87.8649714 |
| C | 4.1582183  | -0.3123433 | 87.6210801 |
| H | 5.1152530  | -0.5785590 | 87.1476605 |
| C | 3.2217989  | -1.3514380 | 87.8972207 |
| C | 3.5131404  | -2.7084300 | 87.5648781 |
| C | 1.9302051  | -1.0278183 | 88.4578446 |
| C | 0.9687672  | -2.0737895 | 88.5904887 |
| C | 1.6659635  | 0.3421684  | 88.8239757 |
| C | 2.6348411  | 1.2995849  | 88.5276333 |
| O | 0.0949994  | 2.4731053  | 87.7034459 |
| O | 2.3570135  | 2.6147872  | 88.8902963 |
| P | 1.4344049  | 3.4453182  | 87.8197919 |
| O | 1.2325447  | 4.8660065  | 88.3496471 |
| O | 2.0757907  | 3.4731507  | 86.4122677 |
| C | -1.1649240 | -0.9130819 | 93.0548971 |
| C | 0.1524922  | -1.2251364 | 92.6248051 |
| H | -2.9608852 | 0.2241618  | 92.6425256 |
| H | -1.5579889 | -1.3531778 | 93.9839380 |
| H | 1.6846395  | -0.9252225 | 91.1360624 |
| H | 0.7801880  | -1.8964618 | 93.2304080 |
| C | 1.2800177  | -3.3809639 | 88.2412857 |
| C | 2.5673662  | -3.7073608 | 87.7391972 |
| H | -0.0335166 | -1.8344628 | 88.9717796 |
| H | 0.5199349  | -4.1695307 | 88.3514049 |
| H | 2.8059416  | -4.7484300 | 87.4733973 |
| H | 4.5049981  | -2.9439645 | 87.1479460 |
| C | -2.6757460 | 4.3852759  | 88.6522192 |
| C | -2.6230484 | 2.9878396  | 88.4097263 |
| C | -3.6188859 | 5.1572734  | 87.9443383 |
| C | -3.4859784 | 2.3943518  | 87.4424019 |
| C | -4.4155638 | 3.2108295  | 86.7699437 |
| C | -4.5069504 | 4.5941341  | 87.0133528 |
| H | -3.6714436 | 6.2407837  | 88.1337712 |
| C | -3.3649603 | 0.9125219  | 87.0853986 |
| H | -5.0920639 | 2.7489813  | 86.0345214 |
| C | -2.3709726 | 0.7205386  | 85.9206615 |
| H | -2.7575778 | 1.1945469  | 84.9927682 |
| H | -2.2162057 | -0.3571156 | 85.7066628 |
| H | -1.3821466 | 1.1667357  | 86.1461245 |
| C | -4.7097073 | 0.2357224  | 86.7824708 |
| H | -2.9322000 | 0.3982936  | 87.9681001 |
| H | -5.1630367 | 0.6064845  | 85.8393136 |
| H | -5.4426968 | 0.4000070  | 87.5979224 |
| H | -4.5700373 | -0.8576271 | 86.6617738 |
| C | -5.5567431 | 5.4567760  | 86.3201715 |
| C | -5.5114298 | 5.3453504  | 84.7863583 |
| H | -6.2594507 | 6.0186810  | 84.3197422 |
| H | -5.7395512 | 4.3145297  | 84.4439693 |
| H | -4.5150125 | 5.6196779  | 84.3832122 |
| C | -6.9652834 | 5.1394066  | 86.8563824 |
| H | -5.3270401 | 6.5131953  | 86.5848173 |
| H | -7.7263406 | 5.8069621  | 86.4017432 |
| H | -7.0115444 | 5.2605836  | 87.9569747 |
| H | -7.2509301 | 4.0923921  | 86.6231447 |
| C | -1.7781999 | 5.0398106  | 89.6981135 |
| C | -1.2897273 | 6.4360279  | 89.2874629 |
| H | -0.5075552 | 6.7849172  | 89.9902585 |
| H | -2.1098396 | 7.1853333  | 89.3029505 |
| H | -0.8383140 | 6.4171942  | 88.2778565 |
| C | -2.4818346 | 5.0739851  | 91.0685959 |
| H | -0.8735126 | 4.4066283  | 89.7995527 |
| H | -1.8189883 | 5.5234084  | 91.8362909 |

### 14ζ-2-ma

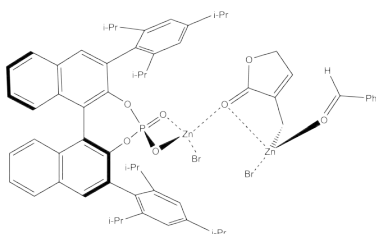

Energy (Hartree) = -11969.99939625

|    |            |            |            |
|----|------------|------------|------------|
| H  | -2.7581176 | 4.0572989  | 91.4119482 |
| H  | -3.4112750 | 5.6797972  | 91.0207195 |
| H  | 6.0252917  | 6.2169851  | 85.1661696 |
| H  | 7.4230673  | 3.2840088  | 90.0986989 |
| H  | 4.8267502  | -0.1770910 | 83.5755990 |
| C  | 6.7908897  | 5.6776731  | 85.7703565 |
| H  | 4.6214811  | 3.9039016  | 91.5847131 |
| H  | 7.7707735  | 7.5416139  | 86.3263687 |
| H  | 2.9031324  | 1.4422914  | 83.1343491 |
| C  | 6.0753861  | 4.4620002  | 86.3543810 |
| C  | 6.6782095  | 2.4826074  | 90.2865121 |
| C  | 7.3256203  | 6.6552916  | 86.8215349 |
| H  | 8.1195787  | 6.1911224  | 87.4448165 |
| C  | 5.9927156  | 4.2037290  | 87.7319485 |
| C  | 5.2680056  | 0.5496569  | 84.2894135 |
| H  | 7.5385700  | 4.6083004  | 83.9865713 |
| C  | 5.4582595  | 3.5386228  | 85.4870013 |
| C  | 7.9156614  | 5.2499752  | 84.8068900 |
| H  | 8.3880797  | 6.1394660  | 84.3417561 |
| H  | 5.4832771  | 3.7419663  | 84.4055241 |
| C  | 4.7378308  | 4.1183108  | 90.5022712 |
| H  | 6.6514159  | 2.2961662  | 91.3803923 |
| H  | 7.0449396  | 1.5622825  | 89.7883603 |
| C  | 5.3152368  | 3.0816548  | 88.2495308 |
| C  | 3.3945727  | 2.1799348  | 83.8027683 |
| C  | 4.7923951  | 2.3903635  | 85.9451226 |
| H  | 5.8223574  | -0.0209013 | 85.0614720 |
| H  | 6.0118316  | 1.1610622  | 83.7369467 |
| C  | 5.2857921  | 2.8841045  | 89.7636517 |
| C  | 4.7128363  | 2.1584792  | 87.3545936 |
| C  | 4.1785034  | 1.4483861  | 84.9074356 |
| H  | 3.7501690  | 4.4190734  | 90.1018267 |
| H  | 2.6154744  | 2.8245240  | 84.2489345 |
| H  | 5.4212561  | 4.9878269  | 90.4104355 |
| H  | 6.5209687  | 7.0161902  | 87.4919045 |
| H  | 4.0456552  | 2.8147523  | 83.1664410 |
| H  | 8.7045460  | 4.6848910  | 85.3470173 |
| H  | 4.6043849  | 2.0369703  | 89.9831367 |
| H  | 3.4535513  | 0.7932001  | 85.4315001 |
| H  | 6.4583346  | 4.9034802  | 88.4397171 |
| Zn | 2.4830844  | 5.4779614  | 86.5627835 |
| Br | 3.6133745  | 7.4460393  | 86.9069225 |
| C  | -2.2801930 | 8.6195315  | 86.1005223 |
| C  | 1.1780158  | 8.0086127  | 83.6739263 |
| C  | -2.4341398 | 8.2146327  | 84.7588705 |
| C  | 0.1304290  | 8.7214928  | 85.8168777 |
| C  | -0.0185567 | 8.3088144  | 84.4737358 |
| C  | -1.0028573 | 8.8739854  | 86.6272381 |
| C  | -1.3077683 | 8.0560464  | 83.9464411 |
| O  | 1.1201555  | 7.4862217  | 82.5495391 |
| H  | -3.1681308 | 8.7304748  | 86.7424277 |
| H  | 1.1414324  | 8.8721714  | 86.2298516 |
| H  | -3.4404216 | 8.0211164  | 84.3559076 |
| H  | -0.8891437 | 9.1750636  | 87.6788822 |
| H  | -1.3896556 | 7.7210504  | 82.9011680 |
| Br | 4.5297343  | 6.1425533  | 82.3797495 |
| Zn | 2.2846965  | 5.6248192  | 82.3166473 |
| H  | -2.4767880 | 5.2374496  | 85.1921663 |
| H  | 0.1609057  | 4.4728571  | 81.1617424 |
| C  | -1.4098925 | 4.1400847  | 83.6058093 |
| C  | -1.6895916 | 4.4709765  | 85.0322559 |
| H  | -2.1573645 | 3.6898471  | 82.9379137 |
| C  | -0.1154734 | 4.4535025  | 83.3000471 |
| C  | 0.7472378  | 4.3539844  | 82.0937020 |
| C  | 0.4302269  | 5.0210683  | 84.5423347 |
| O  | -0.4562530 | 5.0271349  | 85.5336455 |
| O  | 1.5724113  | 5.5114904  | 84.6845828 |
| H  | -1.9533870 | 3.5939482  | 85.6616605 |
| H  | 1.2175214  | 3.3457424  | 82.0619795 |
| H  | 2.1689973  | 8.2016305  | 84.1632450 |

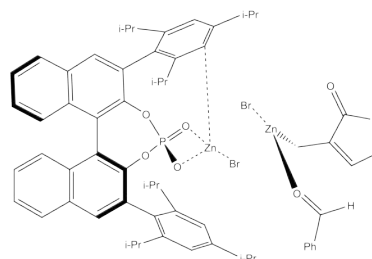

Energy (Hartree) = -11969.98364945

|   |            |            |            |
|---|------------|------------|------------|
| C | -0.5096313 | 1.1928604  | 88.9875390 |
| C | 0.4904241  | 0.2772906  | 89.2899285 |
| C | 0.2695782  | -0.5757771 | 90.4376162 |
| C | 1.2723124  | -1.4408917 | 90.9662305 |
| C | -1.0119995 | -0.5276833 | 91.1054345 |
| C | -1.2512881 | -1.3966439 | 92.2116151 |
| C | -1.9992593 | 0.4237994  | 90.7042463 |
| H | -2.9501784 | 0.4595399  | 91.2562901 |
| C | -1.7499125 | 1.3361537  | 89.6897653 |
| C | 3.7664221  | 1.2473092  | 87.4516044 |
| C | 4.2247017  | -0.0204560 | 87.1190922 |
| H | 5.2221928  | -0.1240211 | 86.6686644 |
| C | 3.4259831  | -1.1826335 | 87.2825448 |
| C | 3.8586781  | -2.4507677 | 86.7936621 |
| C | 2.1385071  | -1.0627651 | 87.9133190 |
| C | 1.3039176  | -2.2201568 | 87.9473438 |
| C | 1.7202811  | 0.2177345  | 88.4451204 |
| C | 2.4917069  | 1.3452158  | 88.1042137 |
| O | -0.2659510 | 2.1042163  | 87.9654887 |
| O | 2.1509419  | 2.6500446  | 88.4643984 |
| P | 0.6805249  | 3.3446347  | 88.4836498 |
| O | 0.3710118  | 3.8097481  | 89.9289804 |
| O | 0.4151766  | 4.5355240  | 87.5391479 |
| C | -0.2638093 | -2.2510387 | 92.6782556 |
| C | 1.0133061  | -2.2563895 | 92.0595654 |
| H | -2.2364744 | -1.3605029 | 92.7027892 |
| H | -0.4620982 | -2.9101110 | 93.5370553 |
| H | 2.2660311  | -1.4526352 | 90.4984085 |
| H | 1.8079233  | -2.9099711 | 92.4504300 |
| C | 1.7393565  | -3.4356917 | 87.4385338 |
| C | 3.0355124  | -3.5626189 | 86.8741896 |
| H | 0.2894993  | -2.1401073 | 88.3602024 |
| H | 1.0659646  | -4.3059614 | 87.4631795 |
| H | 3.3724374  | -4.5336362 | 86.4807444 |
| H | 4.8525648  | -2.5198463 | 86.3243612 |
| C | -2.5524920 | 3.6640726  | 90.2467522 |
| C | -2.5413425 | 2.5615814  | 89.3422788 |
| C | -2.9201749 | 4.9418897  | 89.7472944 |
| C | -3.0112486 | 2.7394886  | 88.0080875 |
| C | -3.3939690 | 4.0187288  | 87.5618749 |
| C | -3.3347348 | 5.1426128  | 88.4023012 |
| H | -2.9926250 | 5.7930055  | 90.4435677 |
| C | -3.1227547 | 1.5597511  | 87.0485985 |
| H | -3.7208335 | 4.1461968  | 86.5183276 |
| C | -2.4422295 | 1.8224432  | 85.6955774 |
| H | -2.9528657 | 2.6079150  | 85.1053174 |
| H | -2.4180547 | 0.8928682  | 85.0918160 |
| H | -1.3939102 | 2.1402732  | 85.8747740 |
| C | -4.6042142 | 1.1753529  | 86.8645724 |
| H | -2.6152495 | 0.6929771  | 87.5190919 |
| H | -5.1758045 | 2.0038770  | 86.3972150 |
| H | -5.0844254 | 0.9363356  | 87.8349519 |
| H | -4.6948116 | 0.2876971  | 86.2057089 |
| C | -3.7753030 | 6.5214367  | 87.9353322 |
| C | -3.0339831 | 6.9714316  | 86.6675642 |
| H | -3.3366055 | 8.0011934  | 86.3886119 |
| H | -3.2385047 | 6.3124098  | 85.7992505 |

14ζ-ma

|    |            |           |            |   |            |           |            |
|----|------------|-----------|------------|---|------------|-----------|------------|
| H  | -1.9410605 | 6.9880113 | 86.8525997 | H | -0.0933964 | 7.2616410 | 82.6551395 |
| C  | -5.3034841 | 6.5571844 | 87.7450532 | H | -0.7330303 | 2.4905383 | 81.4188351 |
| H  | -3.5095014 | 7.2331480 | 88.7470550 | C | -0.4397170 | 5.3007612 | 81.7433374 |
| H  | -5.6356173 | 7.5794676 | 87.4715600 | C | -0.8892662 | 6.6677594 | 82.1478969 |
| H  | -5.8370589 | 6.2572998 | 88.6696214 | H | 0.3874362  | 5.1219015 | 81.0421862 |
| H  | -5.6191973 | 5.8712000 | 86.9319541 | C | -1.1999281 | 4.3567005 | 82.3681093 |
| C  | -2.2217964 | 3.5046364 | 91.7269351 | C | -1.1510597 | 2.8879355 | 82.3655753 |
| C  | -1.5411444 | 4.7178987 | 92.3768266 | C | -2.1704691 | 5.1051521 | 83.2280054 |
| H  | -1.2944390 | 4.4841494 | 93.4318815 | O | -1.9575432 | 6.4564137 | 83.0794080 |
| H  | -2.1878591 | 5.6191679 | 92.3910127 | O | -3.0203424 | 4.6754015 | 83.9889512 |
| H  | -0.5903391 | 4.9752647 | 91.8703585 | H | -1.2716427 | 7.2805453 | 81.2995352 |
| C  | -3.5146078 | 3.1431850 | 92.4901998 | H | -2.1626627 | 2.4606371 | 82.5208598 |
| H  | -1.5177154 | 2.6526979 | 91.8122100 | H | -0.6135143 | 4.9412325 | 85.2002074 |
| H  | -3.2916102 | 2.9263367 | 93.5549909 |   |            |           |            |
| H  | -4.0216399 | 2.2586656 | 92.0560892 |   |            |           |            |
| H  | -4.2377712 | 3.9847609 | 92.4576971 |   |            |           |            |
| H  | 6.7587425  | 6.3250664 | 85.2543012 |   |            |           |            |
| H  | 7.0115697  | 3.2413834 | 90.2650608 |   |            |           |            |
| H  | 5.3303027  | 0.3917287 | 83.2757042 |   |            |           |            |
| C  | 7.1215487  | 5.9094448 | 86.2226173 |   |            |           |            |
| H  | 4.1628524  | 3.7142905 | 91.5592041 |   |            |           |            |
| H  | 7.6893170  | 7.9136126 | 86.8869568 |   |            |           |            |
| H  | 3.4946349  | 2.0288667 | 82.6622602 |   |            |           |            |
| C  | 6.2035683  | 4.7399535 | 86.5665177 |   |            |           |            |
| C  | 6.2558952  | 2.4281747 | 90.2693733 |   |            |           |            |
| C  | 7.1068155  | 7.0450041 | 87.2552685 |   |            |           |            |
| H  | 7.5676475  | 6.7302863 | 88.2145111 |   |            |           |            |
| C  | 5.8818608  | 4.3942805 | 87.8879092 |   |            |           |            |
| C  | 5.6640709  | 1.0795399 | 84.0798627 |   |            |           |            |
| H  | 8.5888164  | 4.6179864 | 85.2060358 |   |            |           |            |
| C  | 5.7096316  | 3.9156999 | 85.5398680 |   |            |           |            |
| C  | 8.5594803  | 5.4033727 | 85.9874216 |   |            |           |            |
| H  | 9.2294915  | 6.2304759 | 85.6727054 |   |            |           |            |
| H  | 5.9607601  | 4.1682905 | 84.4962942 |   |            |           |            |
| C  | 4.2998258  | 4.0388715 | 90.5072228 |   |            |           |            |
| H  | 6.1234821  | 2.0967854 | 91.3202677 |   |            |           |            |
| H  | 6.6742696  | 1.5797300 | 89.6907538 |   |            |           |            |
| C  | 5.0970640  | 3.2683746 | 88.2000631 |   |            |           |            |
| C  | 3.8657503  | 2.7253789 | 83.4423770 |   |            |           |            |
| C  | 4.9137401  | 2.7818447 | 85.7887129 |   |            |           |            |
| H  | 6.1301323  | 0.4686704 | 84.8784892 |   |            |           |            |
| H  | 6.4603111  | 1.7316632 | 83.6623580 |   |            |           |            |
| C  | 4.9152473  | 2.9022955 | 89.6737568 |   |            |           |            |
| C  | 4.5917053  | 2.4590913 | 87.1435899 |   |            |           |            |
| C  | 4.4804827  | 1.9201491 | 84.5997654 |   |            |           |            |
| H  | 3.3072036  | 4.3355160 | 90.1177665 |   |            |           |            |
| H  | 3.0068864  | 3.3302339 | 83.7874037 |   |            |           |            |
| H  | 4.9490539  | 4.9390092 | 90.5230840 |   |            |           |            |
| H  | 6.0768771  | 7.3897825 | 87.4798645 |   |            |           |            |
| H  | 4.6023620  | 3.4003748 | 82.9576949 |   |            |           |            |
| H  | 8.9717584  | 4.9627206 | 86.9191241 |   |            |           |            |
| H  | 4.2228609  | 2.0398683 | 89.7325658 |   |            |           |            |
| H  | 3.6897912  | 1.2256817 | 84.9479219 |   |            |           |            |
| H  | 6.2687374  | 5.0070862 | 88.7155213 |   |            |           |            |
| Zn | -0.6372543 | 5.4711662 | 89.1941348 |   |            |           |            |
| Br | -0.4464861 | 7.7366838 | 89.5546976 |   |            |           |            |
| C  | 2.7375426  | 8.3935844 | 85.7669075 |   |            |           |            |
| C  | 0.4902519  | 4.8348976 | 85.0747313 |   |            |           |            |
| C  | 3.4078075  | 7.1597487 | 85.6569624 |   |            |           |            |
| C  | 0.6111075  | 7.2854393 | 85.4022191 |   |            |           |            |
| C  | 1.2819709  | 6.0473814 | 85.2853365 |   |            |           |            |
| C  | 1.3397424  | 8.4576852 | 85.6392169 |   |            |           |            |
| C  | 2.6873326  | 5.9869538 | 85.4176441 |   |            |           |            |
| O  | 0.9791219  | 3.7385374 | 84.7437373 |   |            |           |            |
| H  | 3.3115659  | 9.3113515 | 85.9683030 |   |            |           |            |
| H  | -0.4848468 | 7.3176567 | 85.3063692 |   |            |           |            |
| H  | 4.4997080  | 7.1106562 | 85.7750119 |   |            |           |            |
| H  | 0.8160969  | 9.4195815 | 85.7422468 |   |            |           |            |
| H  | 3.1977913  | 5.0144411 | 85.3684496 |   |            |           |            |
| Br | 0.9523319  | 0.1794444 | 84.6431618 |   |            |           |            |
| Zn | -0.0026823 | 2.1307638 | 83.8366562 |   |            |           |            |

### 14 $\gamma$ -int1-mi

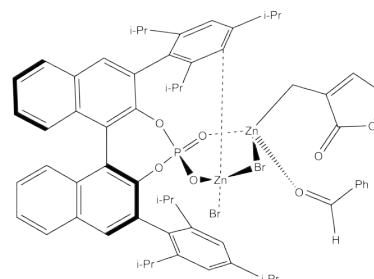

Energy (Hartree) = -11970.04204198

|   |            |            |            |
|---|------------|------------|------------|
| C | 1.2536159  | 2.0600547  | 1.6093817  |
| C | 2.6513814  | 1.9498092  | 1.5929263  |
| C | 3.4274244  | 3.1592610  | 1.7316058  |
| C | 4.8419137  | 3.1987935  | 1.5429365  |
| C | 2.7478854  | 4.3942788  | 2.0400832  |
| C | 3.5123961  | 5.5855278  | 2.2232407  |
| C | 1.3259101  | 4.4170097  | 2.0989495  |
| H | 0.8197150  | 5.3706566  | 2.3123422  |
| C | 0.5581834  | 3.2906591  | 1.8258200  |
| C | 3.3578937  | -1.5301339 | 0.1356831  |
| C | 4.4175638  | -1.9583942 | 0.9245060  |
| H | 4.8477588  | -2.9573701 | 0.7544820  |
| C | 4.9019320  | -1.1782244 | 2.0138524  |
| C | 5.9306412  | -1.6732309 | 2.8702023  |
| C | 4.2863429  | 0.0942243  | 2.3107600  |
| C | 4.6778576  | 0.7654653  | 3.5081337  |
| C | 3.2840190  | 0.6137239  | 1.4091313  |
| C | 2.8602433  | -0.2088611 | 0.3600373  |
| O | 0.4750591  | 0.9161766  | 1.4465217  |
| O | 1.9110695  | 0.2694099  | -0.5351092 |
| P | 0.3317725  | 0.2838117  | -0.0659975 |
| O | -0.3683486 | 1.2345122  | -1.0373979 |
| O | -0.2076901 | -1.1377886 | 0.1571938  |
| C | 4.8899120  | 5.5803397  | 2.0686513  |
| C | 5.5544398  | 4.3784424  | 1.7071872  |
| H | 2.9797936  | 6.5172044  | 2.4709249  |
| H | 5.4666493  | 6.5077260  | 2.2052392  |
| H | 5.3686720  | 2.2792798  | 1.2533018  |
| H | 6.6437078  | 4.3821473  | 1.5491808  |
| C | 5.6673648  | 0.2464240  | 4.3314964  |
| C | 6.3159633  | -0.9729882 | 4.0027914  |
| H | 4.1796257  | 1.7052162  | 3.7819662  |
| H | 5.9464342  | 0.7838269  | 5.2506447  |
| H | 7.1064154  | -1.3696825 | 4.6578608  |
| H | 6.3993715  | -2.6386862 | 2.6224936  |
| C | -1.4952268 | 4.0577641  | 0.5770189  |
| C | -0.9297615 | 3.3548573  | 1.6798568  |
| C | -2.8974262 | 4.0929720  | 0.4429092  |
| C | -1.7775427 | 2.6983683  | 2.6140642  |

|   |            |            |            |    |            |            |            |
|---|------------|------------|------------|----|------------|------------|------------|
| C | -3.1693568 | 2.7630003  | 2.4293129  | H  | 1.8791077  | -2.8667269 | -4.1224195 |
| C | -3.7569862 | 3.4669350  | 1.3606884  | Zn | -1.0055699 | -2.4323410 | -1.1158975 |
| H | -3.3289611 | 4.6470104  | -0.4035698 | Br | -2.5964638 | -4.0634315 | -0.5877494 |
| C | -1.2221493 | 1.9992673  | 3.8535325  | H  | -3.1344722 | -3.1646048 | 3.4674578  |
| H | -3.8287316 | 2.2658259  | 3.1603383  | H  | -5.3121434 | -2.6850565 | 4.6180965  |
| C | -1.6574630 | 0.5287649  | 3.9448801  | C  | -3.8075214 | -2.3873060 | 3.0758993  |
| H | -2.7572947 | 0.4273045  | 4.0521572  | C  | -5.0310265 | -2.1174949 | 3.7172738  |
| H | -1.1931908 | 0.0376576  | 4.8250128  | C  | -3.4444604 | -1.6666879 | 1.9357272  |
| H | -1.3496313 | -0.0290465 | 3.0401038  | C  | -5.9026402 | -1.1327141 | 3.2153996  |
| C | -1.5922545 | 2.7829036  | 5.1272485  | H  | -2.4941684 | -1.8548090 | 1.4194391  |
| H | -0.1158360 | 2.0107359  | 3.7797908  | H  | -6.8607895 | -0.9348469 | 3.7187428  |
| H | -2.6914950 | 2.8082470  | 5.2806224  | C  | -4.3141677 | -0.6738779 | 1.4272370  |
| H | -1.2379875 | 3.8322253  | 5.0715871  | C  | -5.5483304 | -0.4142968 | 2.0680805  |
| H | -1.1382532 | 2.3129867  | 6.0242939  | H  | -5.1339181 | -1.4882012 | -5.1500974 |
| C | -5.2745084 | 3.6156673  | 1.3014982  | H  | -3.4729077 | 0.5655593  | -5.7991492 |
| C | -5.7239527 | 4.7016635  | 2.3017732  | C  | -5.4166973 | -0.4123543 | -5.0781976 |
| H | -6.8304832 | 4.7811193  | 2.3313472  | C  | -4.2295761 | 0.4946285  | -5.0057211 |
| H | -5.3174000 | 5.6914512  | 2.0060830  | H  | -6.2245461 | 0.3473608  | 1.6481245  |
| H | -5.3640140 | 4.4862778  | 3.3279249  | C  | -3.9557266 | 0.0959225  | 0.2409273  |
| C | -5.8391880 | 3.8930834  | -0.0968860 | O  | -2.9085296 | -0.1099966 | -0.4016653 |
| H | -5.7023704 | 2.6501491  | 1.6559080  | H  | -6.1015814 | -0.1909702 | -5.9287354 |
| H | -6.9469462 | 3.9226881  | -0.0620705 | Br | -1.3281284 | -1.2194956 | -3.2193688 |
| H | -5.5558445 | 3.1114323  | -0.8293990 | C  | -4.2311620 | 1.1522975  | -3.8141839 |
| H | -5.5034656 | 4.8781998  | -0.4829716 | O  | -6.1289254 | -0.2118747 | -3.8527158 |
| C | -0.6418633 | 4.8244656  | -0.4354363 | H  | -2.6308843 | 2.5904317  | -3.9207717 |
| C | -0.9767905 | 4.4905025  | -1.8973002 | Zn | -2.0814949 | 0.9401068  | -2.0211693 |
| H | -0.3005135 | 5.0438208  | -2.5806618 | C  | -3.2622085 | 2.0608726  | -3.1810727 |
| H | -2.0159636 | 4.7691900  | -2.1674938 | C  | -5.4500036 | 0.6923311  | -3.0798074 |
| H | -0.8477901 | 3.4097994  | -2.0918816 | H  | -3.7679027 | 2.8006864  | -2.5284597 |
| C | -0.7467634 | 6.3421270  | -0.1858535 | O  | -5.8489672 | 1.0146222  | -1.9720768 |
| H | 0.4145972  | 4.5302140  | -0.2772329 | H  | -4.6724481 | 0.8767668  | -0.1055079 |
| H | -0.0799292 | 6.9024208  | -0.8735926 |    |            |            |            |
| H | -0.4700007 | 6.6098748  | 0.8536476  |    |            |            |            |
| H | -1.7839983 | 6.7011503  | -0.3525778 |    |            |            |            |
| H | -0.8784283 | -4.9562858 | -2.9277851 |    |            |            |            |
| H | 4.2884227  | -2.4129192 | -4.4793043 |    |            |            |            |
| H | 2.6008333  | -5.2845980 | 2.5788591  |    |            |            |            |
| C | 0.1330805  | -4.9326839 | -3.3952298 |    |            |            |            |
| H | 3.3816133  | 0.6344769  | -4.0840223 |    |            |            |            |
| H | -0.7286974 | -5.1244708 | -5.3855440 |    |            |            |            |
| H | 0.4206242  | -4.0864442 | 2.9489306  |    |            |            |            |
| C | 0.9764177  | -4.0102108 | -2.5215187 |    |            |            |            |
| C | 4.6748119  | -1.8087018 | -3.6319663 |    |            |            |            |
| C | -0.0259757 | -4.4602452 | -4.8439129 |    |            |            |            |
| H | 0.9388093  | -4.4884452 | -5.3932062 |    |            |            |            |
| C | 1.8393427  | -3.0297571 | -3.0365321 |    |            |            |            |
| C | 2.5325797  | -5.0641902 | 1.4936439  |    |            |            |            |
| H | 0.7657785  | -6.7496560 | -2.3080539 |    |            |            |            |
| C | 0.9376084  | -4.1738529 | -1.1133559 |    |            |            |            |
| C | 0.6969592  | -6.3678583 | -3.3461080 |    |            |            |            |
| H | 0.0490964  | -7.0613972 | -3.9202024 |    |            |            |            |
| H | 0.2926810  | -4.9614615 | -0.6938590 |    |            |            |            |
| C | 2.7213335  | -0.1727009 | -3.7056988 |    |            |            |            |
| H | 5.3492552  | -1.0342898 | -4.0520989 |    |            |            |            |
| H | 5.2797154  | -2.4798628 | -2.9892078 |    |            |            |            |
| C | 2.6381077  | -2.2222928 | -2.2037580 |    |            |            |            |
| C | 0.3397640  | -3.8436842 | 1.8695010  |    |            |            |            |
| C | 1.7616126  | -3.4279637 | -0.2407513 |    |            |            |            |
| H | 3.5633723  | -5.0038359 | 1.0896608  |    |            |            |            |
| H | 2.0335947  | -5.9259071 | 1.0029309  |    |            |            |            |
| C | 3.5262548  | -1.1572428 | -2.8388344 |    |            |            |            |
| C | 2.6114580  | -2.4284527 | -0.7994509 |    |            |            |            |
| C | 1.7451395  | -3.7600919 | 1.2516890  |    |            |            |            |
| H | 1.9021043  | 0.2934185  | -3.1254016 |    |            |            |            |
| H | -0.1872837 | -2.8753800 | 1.7749329  |    |            |            |            |
| H | 2.2710490  | -0.6742737 | -4.5872338 |    |            |            |            |
| H | -0.4255382 | -3.4282691 | -4.8961141 |    |            |            |            |
| H | -0.2946248 | -4.6227584 | 1.4002253  |    |            |            |            |
| H | 1.7148667  | -6.4045944 | -3.7880673 |    |            |            |            |
| H | 3.9880254  | -0.5745560 | -2.0155446 |    |            |            |            |
| H | 2.2775557  | -2.9466817 | 1.7821368  |    |            |            |            |

### 14 $\gamma$ -int2-mi; COSMO

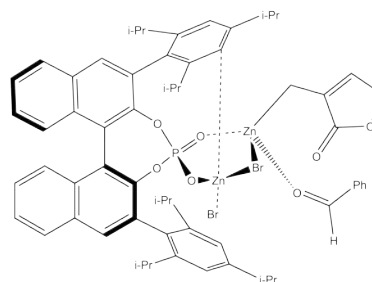

Energy (Hartree) = -11970.05147393

|   |            |            |            |
|---|------------|------------|------------|
| C | 1.2783507  | 1.8362435  | 1.0679883  |
| C | 2.6806828  | 1.8801974  | 1.0732907  |
| C | 3.3207452  | 3.1722060  | 1.1369927  |
| C | 4.7249306  | 3.3516341  | 0.9496457  |
| C | 2.5096011  | 4.3424496  | 1.3669868  |
| C | 3.1377311  | 5.6205111  | 1.4711202  |
| C | 1.0954904  | 4.2086676  | 1.4418839  |
| H | 0.4866743  | 5.1086145  | 1.6166915  |
| C | 0.4545803  | 2.9903012  | 1.2391217  |
| C | 3.8447809  | -1.5886034 | -0.0831469 |
| C | 4.9199667  | -1.8228026 | 0.7640511  |
| H | 5.4794669  | -2.7668563 | 0.6805950  |
| C | 5.2635023  | -0.9110084 | 1.8035566  |
| C | 6.3117460  | -1.2111898 | 2.7249776  |
| C | 4.4876529  | 0.2941211  | 1.9811508  |
| C | 4.7502643  | 1.0976368  | 3.1318206  |
| C | 3.4652525  | 0.6167687  | 1.0119648  |
| C | 3.1797229  | -0.3287773 | 0.0233908  |
| O | 0.6296548  | 0.6074483  | 0.9503856  |
| O | 2.2127523  | -0.0368295 | -0.9338179 |
| P | 0.6262021  | -0.1545170 | -0.5067108 |
| O | -0.1394560 | 0.6317833  | -1.5751951 |
| O | 0.2271428  | -1.6030703 | -0.1819816 |

|   |            |            |            |    |            |            |            |
|---|------------|------------|------------|----|------------|------------|------------|
| C | 4.5089281  | 5.7548299  | 1.3154173  | C  | 3.3894716  | -2.5648559 | -2.3866085 |
| C | 5.3034819  | 4.6105510  | 1.0352005  | C  | 1.0042460  | -4.1739484 | 1.6751095  |
| H | 2.5054872  | 6.5025650  | 1.6590004  | C  | 2.4884220  | -3.6770048 | -0.3792376 |
| H | 4.9809328  | 6.7463686  | 1.3895129  | H  | 4.4302869  | -4.7733943 | 1.2021708  |
| H | 5.3518209  | 2.4782976  | 0.7223897  | H  | 3.0962235  | -5.9625177 | 1.1181510  |
| H | 6.3871407  | 4.7230276  | 0.8780721  | C  | 4.1927237  | -1.4562340 | -3.0572692 |
| C | 5.7627702  | 0.7666501  | 4.0223299  | C  | 3.2637144  | -2.6389455 | -0.9758386 |
| C | 6.5657767  | -0.3856450 | 3.8098829  | C  | 2.4110543  | -3.8747623 | 1.1345207  |
| H | 4.1336749  | 1.9875284  | 3.3168390  | H  | 2.4377742  | -0.2211989 | -3.5198121 |
| H | 5.9399435  | 1.4014064  | 4.9039334  | H  | 0.3038761  | -3.3468167 | 1.4501104  |
| H | 7.3722774  | -0.6317735 | 4.5172425  | H  | 2.9795237  | -1.2458734 | -4.8863452 |
| H | 6.9025422  | -2.1272023 | 2.5673963  | H  | 0.6644041  | -4.3531448 | -5.1221707 |
| C | -1.7130214 | 3.5525646  | 0.0820167  | H  | 0.5741310  | -5.1095675 | 1.2639764  |
| C | -1.0386659 | 2.9198569  | 1.1653458  | H  | 3.0981000  | -6.9248468 | -3.6636689 |
| C | -3.1202031 | 3.5840348  | 0.0811938  | H  | 4.5420605  | -0.7697050 | -2.2588411 |
| C | -1.7937020 | 2.2926265  | 2.1927376  | H  | 2.7442967  | -2.9317115 | 1.6107880  |
| C | -3.1991975 | 2.3662527  | 2.1483399  | H  | 2.8800466  | -3.4763485 | -4.2809915 |
| C | -3.8954636 | 3.0224394  | 1.1139812  | Zn | -0.1842706 | -3.1383466 | -1.3751142 |
| H | -3.6268537 | 4.0687989  | -0.7632113 | Br | -1.6947416 | -4.8853094 | -0.9020566 |
| C | -1.1331997 | 1.5878495  | 3.3770510  | H  | -3.6369022 | -4.1051146 | 2.7518232  |
| H | -3.7619493 | 1.9039481  | 2.9717658  | H  | -5.5078002 | -3.0267959 | 4.0290351  |
| C | -1.4949954 | 0.0919840  | 3.4237749  | C  | -4.0182788 | -3.1196922 | 2.4444061  |
| H | -2.5838013 | -0.0624633 | 3.5764695  | C  | -5.0704771 | -2.5131424 | 3.1588252  |
| H | -0.9659799 | -0.4111034 | 4.2596078  | C  | -3.4555613 | -2.4720594 | 1.3412961  |
| H | -1.2061932 | -0.4162591 | 2.4833135  | C  | -5.5686075 | -1.2562875 | 2.7684276  |
| C | -1.4608367 | 2.2929145  | 4.7062000  | H  | -2.6375350 | -2.9342585 | 0.7683136  |
| H | -0.0349072 | 1.6550714  | 3.2414018  | H  | -6.3942895 | -0.7896625 | 3.3264635  |
| H | -2.5460978 | 2.2475286  | 4.9357033  | C  | -3.9438221 | -1.2016869 | 0.9532132  |
| H | -1.1686166 | 3.3623285  | 4.6768055  | C  | -5.0029700 | -0.5981190 | 1.6703184  |
| H | -0.9215036 | 1.8114511  | 5.5481303  | H  | -6.5191267 | -0.4482805 | -0.9703779 |
| C | -5.4265139 | 3.1146165  | 1.0978530  | H  | -5.0989312 | -1.5711716 | -2.9952517 |
| C | -6.0479432 | 3.0519683  | 2.5032866  | C  | -6.4515112 | -0.0176633 | -1.9963965 |
| H | -7.1511820 | 3.1385581  | 2.4390776  | C  | -5.2694724 | -0.5092024 | -2.7684125 |
| H | -5.6761932 | 3.8823597  | 3.1395460  | H  | -5.3746907 | 0.3886438  | 1.3575506  |
| H | -5.8267068 | 2.1040634  | 3.0339678  | C  | -3.3442557 | -0.4872355 | -0.1699304 |
| C | -5.9472201 | 4.3430447  | 0.3316623  | O  | -2.4967838 | -0.9954998 | -0.9250646 |
| H | -5.7979936 | 2.2290607  | 0.5266741  | H  | -7.4257463 | -0.2167788 | -2.4982666 |
| H | -7.0530435 | 4.3903469  | 0.3979797  | Br | -0.5112932 | -2.1091634 | -3.5866686 |
| H | -5.6882754 | 4.2954278  | -0.7433385 | C  | -4.4708503 | 0.5416389  | -3.1134748 |
| H | -5.5374766 | 5.2834271  | 0.7566343  | O  | -6.2724652 | 1.4015912  | -1.8899284 |
| C | -0.9693486 | 4.2348343  | -1.0680706 | H  | -3.1475371 | -0.0800784 | -4.6859990 |
| C | -1.4089960 | 3.7134547  | -2.4460149 | Zn | -1.6926154 | -0.0378802 | -2.6393779 |
| H | -0.8180504 | 4.2018988  | -3.2481878 | C  | -3.1812301 | 0.6134657  | -3.8216730 |
| H | -2.4826002 | 3.8985984  | -2.6486049 | C  | -5.1312094 | 1.7696326  | -2.5702271 |
| H | -1.2413529 | 2.6227586  | -2.5192771 | H  | -2.9807244 | 1.6463563  | -4.1658723 |
| C | -1.1203732 | 5.7664638  | -0.9911817 | O  | -4.7951359 | 2.9359548  | -2.6654951 |
| H | 0.1080245  | 3.9972319  | -0.9618758 | H  | -3.6612435 | 0.5773334  | -0.3130521 |
| H | -0.5340862 | 6.2591771  | -1.7942736 |    |            |            |            |
| H | -0.7721104 | 6.1678643  | -0.0180290 |    |            |            |            |
| H | -2.1816653 | 6.0675899  | -1.1149355 |    |            |            |            |
| H | 0.2907963  | -5.7774674 | -3.0597203 |    |            |            |            |
| H | 5.1755185  | -2.7226185 | -4.5680142 |    |            |            |            |
| H | 3.4231421  | -5.0921342 | 2.6529203  |    |            |            |            |
| C | 1.3169835  | -5.6545030 | -3.4765725 |    |            |            |            |
| H | 3.9172471  | 0.2130738  | -4.4425255 |    |            |            |            |
| H | 0.6050304  | -6.1075400 | -5.4836143 |    |            |            |            |
| H | 1.0478861  | -4.2882118 | 2.7773827  |    |            |            |            |
| C | 1.9770760  | -4.5636011 | -2.6428825 |    |            |            |            |
| C | 5.4462738  | -2.0259997 | -3.7471385 |    |            |            |            |
| C | 1.1857661  | -5.3183568 | -4.9657189 |    |            |            |            |
| H | 2.1769463  | -5.2619092 | -5.4629368 |    |            |            |            |
| C | 2.7643894  | -3.5402922 | -3.1900551 |    |            |            |            |
| C | 3.3993566  | -4.9852858 | 1.5490130  |    |            |            |            |
| H | 2.1143261  | -7.2784827 | -2.2075470 |    |            |            |            |
| C | 1.8311405  | -4.5980344 | -1.2298683 |    |            |            |            |
| C | 2.0595186  | -6.9923026 | -3.2769636 |    |            |            |            |
| H | 1.5430054  | -7.8087590 | -3.8217780 |    |            |            |            |
| H | 1.2706316  | -5.4322282 | -0.7800279 |    |            |            |            |
| C | 3.3296626  | -0.6327031 | -4.0302518 |    |            |            |            |
| H | 6.0528310  | -1.2084317 | -4.1880236 |    |            |            |            |
| H | 6.0852683  | -2.5809178 | -3.0304486 |    |            |            |            |

### 14 $\gamma$ -int2-mi

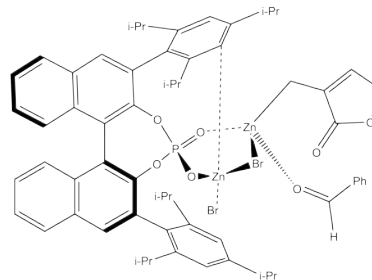

Energy (Hartree) = -11970.0403627

|   |           |           |           |
|---|-----------|-----------|-----------|
| C | 1.2922278 | 1.8402461 | 1.0625227 |
| C | 2.6945889 | 1.8887628 | 1.0654464 |
| C | 3.3305233 | 3.1825806 | 1.1290758 |
| C | 4.7334863 | 3.3668243 | 0.9391621 |
| C | 2.5163266 | 4.3498728 | 1.3619379 |
| C | 3.1409991 | 5.6291807 | 1.4655121 |
| C | 1.1033340 | 4.2108494 | 1.4403671 |
| H | 0.4905335 | 5.1078315 | 1.6165665 |
| C | 0.4649561 | 2.9911464 | 1.2377412 |



|   |            |            |            |    |            |            |            |
|---|------------|------------|------------|----|------------|------------|------------|
| C | 3.8643284  | -1.5796126 | -0.0881750 | C  | 1.9829139  | -4.5669381 | -2.6217512 |
| C | 4.9412749  | -1.8093173 | 0.7577489  | C  | 5.4377073  | -2.0237007 | -3.7601031 |
| H | 5.4996696  | -2.7542876 | 0.6761750  | C  | 1.1737826  | -5.3296706 | -4.9362536 |
| C | 5.2862926  | -0.8947317 | 1.7938982  | H  | 2.1617319  | -5.2784403 | -5.4406734 |
| C | 6.3368474  | -1.1898434 | 2.7136011  | C  | 2.7603642  | -3.5413132 | -3.1793294 |
| C | 4.5083310  | 0.3090226  | 1.9703225  | C  | 3.4228520  | -4.9834379 | 1.5641718  |
| C | 4.7720734  | 1.1153563  | 3.1185124  | H  | 2.1128565  | -7.2816988 | -2.1765402 |
| C | 3.4832139  | 0.6278171  | 1.0026980  | C  | 1.8546738  | -4.6001083 | -1.2081780 |
| C | 3.1980869  | -0.3198580 | 0.0157833  | C  | 2.0518065  | -6.9994590 | -3.2465378 |
| O | 0.6474151  | 0.6104314  | 0.9429300  | H  | 1.5290774  | -7.8168501 | -3.7839620 |
| O | 2.2309886  | -0.0318411 | -0.9407515 | H  | 1.2914743  | -5.4283962 | -0.7511544 |
| P | 0.6448306  | -0.1504733 | -0.5151194 | C  | 3.3159558  | -0.6370329 | -4.0378638 |
| O | -0.1229426 | 0.6345283  | -1.5825012 | H  | 6.0398965  | -1.2077887 | -4.2099762 |
| O | 0.2469694  | -1.5989994 | -0.1887697 | H  | 6.0824928  | -2.5730795 | -3.0444965 |
| C | 4.5109045  | 5.7681877  | 1.3074834  | C  | 3.3914445  | -2.5629416 | -2.3850965 |
| C | 5.3081311  | 4.6270096  | 1.0250840  | C  | 1.0369132  | -4.1445583 | 1.6974794  |
| H | 2.5060478  | 6.5089716  | 1.6547636  | C  | 2.5148553  | -3.6744377 | -0.3667799 |
| H | 4.9796777  | 6.7612189  | 1.3813102  | H  | 4.4545338  | -4.7838382 | 1.2119419  |
| H | 5.3616976  | 2.4949975  | 0.7102166  | H  | 3.1093396  | -5.9597744 | 1.1388799  |
| H | 6.3911130  | 4.7427820  | 0.8660551  | C  | 4.1862381  | -1.4542702 | -3.0663554 |
| C | 5.7875093  | 0.7890974  | 4.0067355  | C  | 3.2807245  | -2.6350778 | -0.9729697 |
| C | 6.5921737  | -0.3615019 | 3.7953784  | C  | 2.4446362  | -3.8648915 | 1.1485900  |
| H | 4.1536811  | 2.0042055  | 3.3017948  | H  | 2.4280904  | -0.2216830 | -3.5239944 |
| H | 5.9654627  | 1.4267024  | 4.8860592  | H  | 0.3458586  | -3.3102669 | 1.4710108  |
| H | 7.4010452  | -0.6043289 | 4.5010940  | H  | 2.9590819  | -1.2545313 | -4.8879774 |
| H | 6.9289153  | -2.1052163 | 2.5569302  | H  | 0.6529721  | -4.3645365 | -5.0938890 |
| C | -1.7046979 | 3.5722006  | 0.0961537  | H  | 0.5914964  | -5.0755764 | 1.2923299  |
| C | -1.0284006 | 2.9213376  | 1.1675010  | H  | 3.0883582  | -6.9386648 | -3.6396517 |
| C | -3.1111039 | 3.6157947  | 0.1049215  | H  | 4.5381128  | -0.7630700 | -2.2730388 |
| C | -1.7828091 | 2.2835938  | 2.1889537  | H  | 2.7909999  | -2.9236703 | 1.6189557  |
| C | -3.1879630 | 2.3668946  | 2.1523458  | H  | 2.8621025  | -3.4779571 | -4.2716327 |
| C | -3.8850316 | 3.0447807  | 1.1328090  | Zn | -0.2047100 | -3.1311737 | -1.3682746 |
| H | -3.6189084 | 4.1159442  | -0.7293401 | Br | -1.6653964 | -4.8979395 | -0.8583206 |
| C | -1.1228806 | 1.5565168  | 3.3600842  | H  | -3.8742070 | -4.1666284 | 2.6175972  |
| H | -3.7492108 | 1.8959975  | 2.9720515  | H  | -5.7323982 | -3.0424044 | 3.8775653  |
| C | -1.4954833 | 0.0627408  | 3.3851184  | C  | -4.2008021 | -3.1544555 | 2.3350623  |
| H | -2.5846389 | -0.0865701 | 3.5408284  | C  | -5.2445851 | -2.5222891 | 3.0384420  |
| H | -0.9665533 | -0.4581830 | 4.2099105  | C  | -3.5741446 | -2.4997082 | 1.2712435  |
| H | -1.2138992 | -0.4332975 | 2.4358941  | C  | -5.6705724 | -1.2312240 | 2.6764727  |
| C | -1.4401865 | 2.2437440  | 4.7008767  | H  | -2.7617316 | -2.9848055 | 0.7081017  |
| H | -0.0247137 | 1.6175624  | 3.2215649  | H  | -6.4896199 | -0.7425782 | 3.2255109  |
| H | -2.5247956 | 2.2041108  | 4.9339613  | C  | -3.9903695 | -1.1959246 | 0.9126430  |
| H | -1.1403222 | 3.3111409  | 4.6861658  | H  | -5.0415382 | -0.5655700 | 1.6181118  |
| H | -0.9019916 | 1.7460980  | 5.5340688  | C  | -6.4849997 | -0.5915297 | -0.9671020 |
| C | -5.4153349 | 3.1500569  | 1.1251105  | H  | -5.0685594 | -1.6219884 | -3.0429063 |
| C | -6.0291382 | 3.0759420  | 2.5333613  | C  | -6.4278804 | -0.1170804 | -1.9747132 |
| H | -7.1319908 | 3.1734121  | 2.4777473  | C  | -5.2483928 | -0.5710568 | -2.7754474 |
| H | -5.6464163 | 3.8949970  | 3.1775186  | H  | -5.3549353 | 0.4475510  | 1.3272879  |
| H | -5.8125703 | 2.1200696  | 3.0519767  | C  | -3.3293319 | -0.4764334 | -0.1734590 |
| C | -5.9286219 | 4.3915697  | 0.3754855  | O  | -2.4787059 | -0.9983730 | -0.9151483 |
| H | -5.7984149 | 2.2759328  | 0.5439733  | H  | -7.4050101 | -0.3011953 | -2.4783574 |
| H | -7.0329162 | 4.4528183  | 0.4538131  | Br | -0.5162028 | -2.1147181 | -3.5854886 |
| H | -5.6824827 | 4.3458584  | -0.7023990 | C  | -4.4618174 | 0.0984305  | -3.0882965 |
| H | -5.5021644 | 5.3232328  | 0.8028242  | O  | -6.2567826 | 1.2951064  | -1.8096490 |
| C | -0.9659490 | 4.2541677  | -1.0573541 | H  | -3.1355594 | -0.0597680 | -4.6821226 |
| C | -1.4080773 | 3.7208746  | -2.4303813 | Zn | -1.6776017 | -0.0440589 | -2.6335978 |
| H | -0.8280813 | 4.2119226  | -3.2388693 | C  | -3.1786180 | 0.6106887  | -3.8005204 |
| H | -2.4852767 | 3.8916883  | -2.6266928 | C  | -5.1235010 | 1.7005369  | -2.4874619 |
| H | -1.2251533 | 2.6323256  | -2.4982887 | H  | -2.9972375 | 1.6561926  | -4.1156214 |
| C | -1.1237350 | 5.7851673  | -0.9886655 | O  | -4.7913495 | 2.8683718  | -2.5350763 |
| H | 0.1128011  | 4.0221930  | -0.9536562 | H  | -3.6009957 | 0.6031543  | -0.2978184 |
| H | -0.5412286 | 6.2763531  | -1.7953110 |    |            |            |            |
| H | -0.7754339 | 6.1936212  | -0.0184043 |    |            |            |            |
| H | -2.1860143 | 6.0823451  | -1.1116683 |    |            |            |            |
| H | 0.2895055  | -5.7764471 | -3.0230124 |    |            |            |            |
| H | 5.1648385  | -2.7264024 | -4.5750054 |    |            |            |            |
| H | 3.4509875  | -5.0869148 | 2.6683310  |    |            |            |            |
| C | 1.3137098  | -5.6595948 | -3.4466230 |    |            |            |            |
| H | 3.8997015  | 0.2065462  | -4.4599034 |    |            |            |            |
| H | 0.5878203  | -6.1192526 | -5.4475403 |    |            |            |            |
| H | 1.0837178  | -4.2542622 | 2.8001480  |    |            |            |            |

ed<sub>dis.</sub> = 14 $\gamma$ -sim.-mi; COSMO

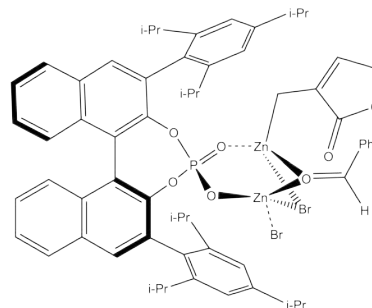

Energy (Hartree) = -11970.04843752

|    |            |            |            |
|----|------------|------------|------------|
| C  | 1.2708951  | 1.6459531  | 1.0528918  |
| C  | 2.6557038  | 1.7995368  | 1.1869910  |
| C  | 3.1723429  | 3.1466590  | 1.2446577  |
| C  | 4.5670961  | 3.4413689  | 1.1737649  |
| C  | 2.2446531  | 4.2484700  | 1.3459859  |
| C  | 2.7518822  | 5.5800979  | 1.4342194  |
| C  | 0.8426170  | 3.9954206  | 1.3306276  |
| H  | 0.1494441  | 4.8435955  | 1.4374063  |
| C  | 0.3302000  | 2.7172347  | 1.1384593  |
| C  | 4.2393252  | -1.6304894 | 0.4252978  |
| C  | 5.2159006  | -1.7010202 | 1.4115410  |
| H  | 5.8702005  | -2.5851715 | 1.4574508  |
| C  | 5.3423265  | -0.6994801 | 2.4158926  |
| C  | 6.2886552  | -0.8401140 | 3.4757371  |
| C  | 4.4556554  | 0.4405085  | 2.4040227  |
| C  | 4.5098541  | 1.3417728  | 3.5104603  |
| C  | 3.5347252  | 0.6000622  | 1.3000942  |
| C  | 3.4450398  | -0.4444697 | 0.3726133  |
| O  | 0.7350685  | 0.3726556  | 0.8935885  |
| O  | 2.5802508  | -0.3274832 | -0.7072600 |
| P  | 0.9531478  | -0.4112300 | -0.5253142 |
| O  | 4.0222200  | 0.3621004  | -1.7343717 |
| O  | 0.4293711  | -1.8265687 | -0.2531690 |
| C  | 4.1154050  | 5.8293119  | 1.3876570  |
| C  | 5.0269484  | 4.7496016  | 1.2402806  |
| H  | 2.0335991  | 6.4103121  | 1.5227936  |
| H  | 4.4922716  | 6.8617107  | 1.4479860  |
| H  | 5.2822258  | 2.6158135  | 1.0516468  |
| H  | 6.1069059  | 4.9512375  | 1.1723182  |
| C  | 5.4270591  | 1.1651667  | 4.5378109  |
| C  | 6.3398868  | 0.0772901  | 4.5142476  |
| H  | 3.8055356  | 2.1833633  | 3.5530494  |
| H  | 5.4412771  | 1.8730272  | 5.3806854  |
| H  | 7.0698102  | -0.0464181 | 5.3287324  |
| H  | 6.9665124  | -1.7081547 | 3.4608752  |
| C  | -1.8509626 | 2.9419042  | -0.1198579 |
| C  | -1.1352649 | 2.4409656  | 1.0064042  |
| C  | -3.2304788 | 2.6829615  | -0.2139945 |
| C  | -1.8139953 | 1.6598440  | 1.9839751  |
| C  | -3.1945043 | 1.4290869  | 1.8370154  |
| C  | -3.9292020 | 1.9424076  | 0.7562454  |
| H  | -3.7879040 | 3.0679962  | -1.0840895 |
| C  | -1.1141232 | 1.0849889  | 3.2153001  |
| H  | -3.7107412 | 0.8279614  | 2.6000015  |
| C  | -1.2451059 | -0.4483626 | 3.2847116  |
| H  | -2.3010664 | -0.7661689 | 3.4066043  |
| H  | -0.6716563 | -0.8459183 | 4.1483775  |
| H  | -0.8514707 | -0.9216171 | 2.3639514  |
| C  | -1.6249919 | 1.7553676  | 4.5047177  |
| H  | -0.0338768 | 1.3214161  | 3.1404730  |
| H  | -2.7041855 | 1.5519898  | 4.6667253  |
| H  | -1.4924350 | 2.8557659  | 4.4651567  |
| H  | -1.0746541 | 1.3741190  | 5.3899863  |
| C  | -5.4390807 | 1.7743022  | 0.6383893  |
| C  | -5.9830873 | 0.5008938  | 1.3004772  |
| H  | -7.0530904 | 0.3603817  | 1.0424986  |
| H  | -5.9270203 | 0.5643390  | 2.4076918  |
| H  | -5.4228998 | -0.4053353 | 0.9930490  |
| C  | -6.1552141 | 3.0296285  | 1.1773605  |
| H  | -5.6612599 | 1.7149897  | -0.4501727 |
| H  | -7.2539608 | 2.9509717  | 1.0393351  |
| H  | -5.8072556 | 3.9481554  | 0.6628215  |
| H  | -5.9548784 | 3.1560513  | 2.2621889  |
| C  | -1.1737886 | 3.7393685  | -1.2342273 |
| C  | -1.4801707 | 3.1669253  | -2.6259580 |
| H  | -0.8760302 | 3.6748146  | -3.4045922 |
| H  | -2.5478827 | 3.2848380  | -2.9036908 |
| H  | -1.2329509 | 2.0905409  | -2.6707610 |
| C  | -1.5455807 | 5.2322751  | -1.1607172 |
| H  | -0.0781265 | 3.6550527  | -1.0887510 |
| H  | -1.0185426 | 5.8085924  | -1.9491660 |
| H  | -1.2829848 | 5.6757146  | -0.1790125 |
| H  | -2.6367781 | 5.3763621  | -1.3078898 |
| H  | 3.4178067  | -7.1185228 | -2.4513217 |
| H  | 6.2488650  | -2.6300670 | -3.8222455 |
| H  | 3.6363304  | -5.0574977 | 3.3943750  |
| C  | 2.9673876  | -6.2442728 | -2.9758837 |
| H  | 4.4769816  | -0.0037873 | -4.0500367 |
| H  | 1.1997968  | -7.4269884 | -3.5282836 |
| H  | 1.2206483  | -4.3974137 | 2.8495419  |
| C  | 3.3221180  | -5.0191657 | -2.1337203 |
| C  | 6.2802007  | -1.8607837 | -3.0224162 |
| C  | 1.4421696  | -6.4758939 | -3.0106579 |
| H  | 0.9344926  | -5.6513839 | -3.5517636 |
| C  | 3.8992086  | -3.8549453 | -2.6660390 |
| C  | 3.8862147  | -5.0218366 | 2.3135281  |
| H  | 4.6371499  | -6.0728933 | -4.4018178 |
| C  | 3.0487043  | -5.0352396 | -0.7532814 |
| C  | 3.5375083  | -6.2145656 | -4.3985083 |
| H  | 3.3157853  | -7.1654350 | -4.9237131 |
| H  | 2.5949417  | -5.9394403 | -0.3149279 |
| C  | 3.9983259  | -0.9150869 | -3.6363059 |
| H  | 6.7760117  | -0.9607564 | -3.4417135 |
| H  | 6.9156292  | -2.2540527 | -2.2028205 |
| C  | 4.2094544  | -2.7361181 | -1.8673344 |
| C  | 1.4798903  | -4.4126787 | 1.7702397  |
| C  | 3.3274076  | -3.9452281 | 0.0871939  |
| H  | 4.9507485  | -4.7267223 | 2.2182922  |
| H  | 3.7893131  | -6.0516355 | 1.9095583  |
| C  | 4.8654488  | -1.5195920 | -2.5174865 |
| C  | 3.9343116  | -2.7849345 | -0.4767517 |
| C  | 2.9589429  | -4.0444854 | 1.5681425  |
| H  | 2.9976455  | -0.6322356 | -3.2568832 |
| H  | 0.8197624  | -3.6940905 | 1.2471516  |
| H  | 3.8526720  | -1.6265415 | -4.4752919 |
| H  | 1.0072307  | -6.5222629 | -1.9917359 |
| H  | 1.2529603  | -5.4314530 | 1.3909582  |
| H  | 3.0865593  | -5.3952637 | -4.9968885 |
| H  | 4.9813100  | -0.7421718 | -1.7345773 |
| H  | 3.0999721  | -3.0423141 | 2.0194361  |
| H  | 4.1182694  | -3.8024753 | -3.7421430 |
| Zn | -0.1691140 | -0.4106145 | -3.4611022 |
| Br | -0.1174083 | 0.8460293  | -5.4106807 |
| C  | -5.8740677 | 1.5497039  | -4.1991984 |
| C  | -3.1394912 | -0.9838912 | -2.1522831 |
| C  | -4.5356029 | 1.5028575  | -4.6383432 |
| C  | -5.3842391 | -0.0667474 | -2.4587170 |
| C  | -4.0319992 | -0.1076529 | -2.8869814 |
| C  | -6.3005599 | 0.7624892  | -3.1140456 |
| C  | -3.6148706 | 0.6772521  | -3.9903653 |
| O  | -1.9104714 | -1.1423831 | -2.3662325 |
| H  | -6.5938224 | 2.2050853  | -4.7137190 |
| H  | -5.6971799 | -0.6864742 | -1.6039662 |
| H  | -4.2106756 | 2.1154199  | -5.4925233 |
| H  | -7.3480520 | 0.8007941  | -2.7802111 |
| H  | -2.5722477 | 0.6387802  | -4.3409186 |
| Br | 0.4912791  | -2.7880658 | -3.5655156 |
| Zn | -0.7574548 | -2.9319112 | -1.3880854 |
| H  | -3.1142650 | -4.7071690 | 3.6874692  |
| H  | -2.9258820 | -4.2617426 | -1.3467961 |
| C  | -1.9006430 | -4.6589650 | 1.8616647  |
| C  | -2.5453979 | -4.0041185 | 3.0388013  |
| H  | -1.1569447 | -5.4608919 | 1.9543726  |
| C  | -2.3646572 | -4.0997994 | 0.7102297  |
| C  | -2.0200264 | -4.3233445 | -0.7078184 |
| C  | -3.3785324 | -3.0845177 | 1.1229134  |
| O  | -3.4618892 | -3.0474923 | 2.4861829  |
| O  | -4.0815077 | -2.3668682 | 0.4237061  |
| H  | -1.8205528 | -3.4608569 | 3.6871333  |
| H  | -1.5427794 | -5.3117312 | -0.8625166 |

H -3.5899160 -1.5746656 -1.3183081

ed<sub>dis.</sub> = 14 $\gamma$ -sim.-mi

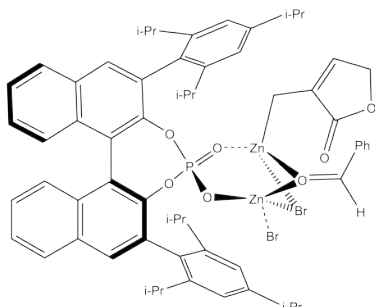

Energy (Hartree) = -11970.03741504

|   |            |            |            |
|---|------------|------------|------------|
| C | 1.2635925  | 1.6366567  | 1.0518205  |
| C | 2.6479106  | 1.7929345  | 1.1869210  |
| C | 3.1622444  | 3.1409028  | 1.2421946  |
| C | 4.5564074  | 3.4375174  | 1.1730449  |
| C | 2.2330920  | 4.2414974  | 1.3397580  |
| C | 2.7387130  | 5.5733470  | 1.4257133  |
| C | 0.8319042  | 3.9856885  | 1.3242378  |
| H | 0.1360778  | 4.8318577  | 1.4292312  |
| C | 0.3213631  | 2.7066195  | 1.1350785  |
| C | 4.2398706  | -1.6344478 | 0.4317712  |
| C | 5.2154162  | -1.7008904 | 1.4190269  |
| H | 5.8708991  | -2.5841873 | 1.4655189  |
| C | 5.3389549  | -0.6980843 | 2.4220490  |
| C | 6.2844467  | -0.8338249 | 3.4825983  |
| C | 4.4498149  | 0.4397269  | 2.4073017  |
| C | 4.5018977  | 1.3434821  | 3.5114911  |
| C | 3.5290687  | 0.5953702  | 1.3027309  |
| C | 3.4418678  | -0.4508683 | 0.3768580  |
| O | 0.7296765  | 0.3624873  | 0.8939352  |
| O | 2.5780398  | -0.3391036 | -0.7030889 |
| P | 0.9508984  | -0.4209408 | -0.5253640 |
| O | 0.3994183  | 0.3514048  | -1.7335173 |
| O | 0.4262561  | -1.8370349 | -0.2540251 |
| C | 4.1013936  | 5.8244820  | 1.3812463  |
| C | 5.0142000  | 4.7460614  | 1.2380412  |
| H | 2.0189557  | 6.4026469  | 1.5106177  |
| H | 4.4765073  | 6.8575563  | 1.4398627  |
| H | 5.2719181  | 2.6119752  | 1.0542371  |
| H | 6.0939981  | 4.9487641  | 1.1717564  |
| C | 5.4191266  | 1.1714179  | 4.5389896  |
| C | 6.3336795  | 0.0857205  | 4.5185860  |
| H | 3.7958682  | 2.1836812  | 3.5505706  |
| H | 5.4317529  | 1.8816926  | 5.3797796  |
| H | 7.0636527  | -0.0347030 | 5.3334425  |
| H | 6.9639247  | -1.7006182 | 3.4699908  |
| C | -1.8640677 | 2.9208677  | -0.1173894 |
| C | -1.1443119 | 2.4286479  | 1.0094272  |
| C | -3.2449507 | 2.6658595  | -0.2007432 |
| C | -1.8191817 | 1.6570281  | 1.9968940  |
| C | -3.2006609 | 1.4282143  | 1.8595924  |
| C | -3.9401292 | 1.9362595  | 0.7797536  |
| H | -3.8064328 | 3.0458063  | -1.0704890 |
| C | -1.1122995 | 1.0907197  | 3.2281020  |
| H | -3.7143344 | 0.8340161  | 2.6297897  |
| C | -1.2384986 | -0.4425524 | 3.3053187  |
| H | -2.2932984 | -0.7629666 | 3.4302237  |
| H | -0.6615611 | -0.8338121 | 4.1696316  |

|    |            |            |            |
|----|------------|------------|------------|
| H  | -0.8446732 | -0.9181195 | 2.3858097  |
| C  | -1.6186476 | 1.7663494  | 4.5162708  |
| H  | -0.0330517 | 1.3295862  | 3.1467998  |
| H  | -2.6962725 | 1.5611462  | 4.6853709  |
| H  | -1.4903212 | 2.8667569  | 4.4697136  |
| H  | -1.0630050 | 1.3921638  | 5.4011804  |
| C  | -5.4520197 | 1.7766319  | 0.6767356  |
| C  | -5.9936832 | 0.4937113  | 1.3226757  |
| H  | -7.0673421 | 0.3608436  | 1.0758399  |
| H  | -5.9261187 | 0.5379780  | 2.4300234  |
| H  | -5.4401223 | -0.4100452 | 0.9966457  |
| C  | -6.1545664 | 3.0256160  | 1.2470799  |
| H  | -5.6875906 | 1.7387689  | -0.4102174 |
| H  | -7.2556474 | 2.9556668  | 1.1234892  |
| H  | -5.8077847 | 3.9513937  | 0.7452505  |
| H  | -5.9385329 | 3.1320888  | 2.3308111  |
| C  | -1.1890475 | 3.7032284  | -1.2436056 |
| C  | -1.5134058 | 3.1233989  | -2.6279871 |
| H  | -0.9048908 | 3.6104858  | -3.4160232 |
| H  | -2.5805496 | 3.2569974  | -2.9011903 |
| H  | -1.2844540 | 2.0428046  | -2.6642522 |
| C  | -1.5457257 | 5.2000835  | -1.1794622 |
| H  | -0.0930501 | 3.6083547  | -1.1071778 |
| H  | -1.0221111 | 5.7645978  | -1.9785280 |
| H  | -1.2691679 | 5.6503627  | -0.2049059 |
| H  | -2.6369684 | 5.3536625  | -1.3156902 |
| H  | 3.4222449  | -7.1196085 | -2.4533916 |
| H  | 6.2475510  | -2.6272516 | -3.8154534 |
| H  | 3.6507480  | -5.0862777 | 3.3944241  |
| C  | 2.9691445  | -6.2441169 | -2.9737705 |
| H  | 4.4704506  | -0.0013541 | -4.0415698 |
| H  | 1.1983496  | -7.4240733 | -3.5249350 |
| H  | 1.2371912  | -4.4035397 | 2.8598073  |
| C  | 3.3263117  | -5.0212669 | -2.1295789 |
| C  | 6.2772996  | -1.8580172 | -3.0156770 |
| C  | 1.4438379  | -6.4753471 | -3.0044672 |
| H  | 0.9344183  | -5.6485266 | -3.5401684 |
| C  | 3.8980300  | -3.8544966 | -2.6611144 |
| C  | 3.8962173  | -5.0469735 | 2.3127410  |
| H  | 4.6334778  | -6.0669459 | -4.4047218 |
| C  | 3.0603300  | -5.0419791 | -0.7482029 |
| C  | 3.5341883  | -6.2101489 | -4.3982214 |
| H  | 3.3123354  | -7.1595615 | -4.9258722 |
| H  | 2.6127286  | -5.9494013 | -0.3099314 |
| C  | 3.9941870  | -0.9140586 | -3.6287048 |
| H  | 6.7723973  | -0.9576766 | -3.4349534 |
| H  | 6.9129765  | -2.2513124 | -2.1965409 |
| C  | 4.2091167  | -2.7372003 | -1.8613387 |
| C  | 1.4933780  | -4.4120873 | 1.7795433  |
| C  | 3.3391210  | -3.9534753 | 0.0937479  |
| H  | 4.9628333  | -4.7608607 | 2.2146308  |
| H  | 3.7905134  | -6.0740122 | 1.9043297  |
| C  | 4.8621070  | -1.5187593 | -2.5109163 |
| C  | 3.9389019  | -2.7897624 | -0.4699900 |
| C  | 2.9756087  | -4.0576227 | 1.5756305  |
| H  | 2.9937887  | -0.6319424 | -3.2485051 |
| H  | 0.8394130  | -3.6828701 | 1.2632436  |
| H  | 3.8483496  | -1.6234595 | -4.4692594 |
| H  | 1.0123258  | -6.5256789 | -1.9842742 |
| H  | 1.2557438  | -5.4255810 | 1.3922340  |
| H  | 3.0797005  | -5.3902661 | -4.9928564 |
| H  | 4.9770758  | -0.7419761 | -1.7272874 |
| H  | 3.1270898  | -3.0595488 | 2.0323745  |
| H  | 4.1123657  | -3.7987322 | -3.7378738 |
| Zn | -0.1252240 | -0.3930135 | -3.4856539 |
| Br | -0.1198855 | 0.8640667  | -5.4253081 |
| C  | -5.8515138 | 1.5622968  | -4.2423142 |
| C  | -3.1239380 | -0.9586710 | -2.1681552 |
| C  | -4.5223709 | 1.4793832  | -4.7015939 |
| C  | -5.3591169 | -0.0110170 | -2.4636214 |
| C  | -4.0159202 | -0.0870449 | -2.9130363 |

|    |            |            |            |
|----|------------|------------|------------|
| C  | -6.2722104 | 0.8150232  | -3.1272526 |
| C  | -3.6037594 | 0.6575688  | -4.0451561 |
| O  | -1.9015592 | -1.1343454 | -2.3960063 |
| H  | -6.5692387 | 2.2147386  | -4.7636563 |
| H  | -5.6655189 | -0.5993224 | -1.5845274 |
| H  | -4.1989384 | 2.0612386  | -5.5775787 |
| H  | -7.3126498 | 0.8819755  | -2.7760096 |
| H  | -2.5663956 | 0.5951969  | -4.4098686 |
| Br | 0.4966173  | -2.7848659 | -3.5839591 |
| Zn | -0.7514410 | -2.9232617 | -1.4176394 |
| H  | -3.1012799 | -4.6696907 | 3.6691918  |
| H  | -2.9380804 | -4.2311657 | -1.3671270 |
| C  | -1.8982943 | -4.6376750 | 1.8342935  |
| C  | -2.5314046 | -3.9730766 | 3.0135197  |
| H  | -1.1581194 | -5.4432029 | 1.9234276  |
| C  | -2.3638230 | -4.0771392 | 0.6845496  |
| C  | -2.0287672 | -4.3033200 | -0.7343489 |
| C  | -3.3666949 | -3.0504950 | 1.1016205  |
| O  | -3.4433581 | -3.0127976 | 2.4658480  |
| O  | -4.0626109 | -2.3258657 | 0.4049270  |
| H  | -1.7975216 | -3.4326252 | 3.6546248  |
| H  | -1.5646491 | -5.2971432 | -0.8935061 |
| H  | -3.5724825 | -1.5278689 | -1.3177278 |

### 14ν-2-mi; COSMO

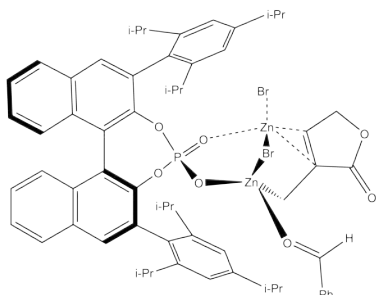

Energy (Hartree) = -11970.04425159

|   |            |            |            |
|---|------------|------------|------------|
| C | -0.8961937 | 1.0214256  | 89.7851418 |
| C | 0.1023392  | 0.0562344  | 89.9604347 |
| C | 0.3141044  | -0.4533637 | 91.2968507 |
| C | 1.4083365  | -1.3038814 | 91.6411237 |
| C | -0.5947174 | -0.0595047 | 92.3483138 |
| C | -0.4192565 | -0.5919369 | 93.6613611 |
| C | -1.6121849 | 0.9001025  | 92.0796164 |
| H | -2.2743458 | 1.2161418  | 92.9003148 |
| C | -1.7452445 | 1.4957562  | 90.8311835 |
| C | 2.6088904  | 0.3280940  | 87.0580325 |
| C | 2.9009136  | -1.0095540 | 86.8207787 |
| H | 3.6802802  | -1.2716649 | 86.0894442 |
| C | 2.1909505  | -2.0599722 | 87.4738768 |
| C | 2.4358008  | -3.4276379 | 87.1459609 |
| C | 1.1918604  | -1.7439507 | 88.4683411 |
| C | 0.4445527  | -2.8158765 | 89.0420559 |
| C | 0.9656776  | -0.3614128 | 88.8172108 |
| C | 1.6198365  | 0.6086552  | 88.0510194 |
| O | -1.1371245 | 1.5338390  | 88.5160211 |
| O | 1.3555317  | 1.9534894  | 88.2913648 |
| P | -0.0806752 | 2.5589560  | 87.7967433 |
| O | -0.1472765 | 3.9758560  | 88.3852079 |
| O | -0.3492449 | 2.3875273  | 86.2910134 |
| C | 0.6329755  | -1.4473316 | 93.9506060 |
| C | 1.5634403  | -1.7881148 | 92.9330867 |
| H | -1.1293489 | -0.2913275 | 94.4478213 |
| H | 0.7610052  | -1.8451222 | 94.9688410 |
| H | 2.1454594  | -1.5692272 | 90.8714291 |
| H | 2.4204067  | -2.4368521 | 93.1706070 |
| C | 0.6941842  | -4.1344946 | 88.6859503 |

|   |            |            |            |
|---|------------|------------|------------|
| C | 1.7078973  | -4.4474233 | 87.7413012 |
| H | -0.3473883 | -2.5856901 | 89.7686703 |
| H | 0.0978624  | -4.9427175 | 89.1363113 |
| H | 1.9035041  | -5.4968626 | 87.4730576 |
| H | 3.2086130  | -3.6567010 | 86.3953500 |
| C | -2.3687022 | 3.9102580  | 91.1803903 |
| C | -2.6676365 | 2.6500651  | 90.5882722 |
| C | -3.2489424 | 4.9872219  | 90.9545491 |
| C | -3.8141645 | 2.5094785  | 89.7576616 |
| C | -4.6527499 | 3.6210571  | 89.5582561 |
| C | -4.3966270 | 4.8697620  | 90.1536250 |
| H | -3.0332508 | 5.9609835  | 91.4248034 |
| C | -4.1870295 | 1.1769455  | 89.1104077 |
| H | -5.5461331 | 3.5021304  | 88.9243822 |
| C | -4.2736488 | 1.2798538  | 87.5769085 |
| H | -5.0749462 | 1.9786051  | 87.2573847 |
| H | -4.5012139 | 0.2886031  | 87.1332923 |
| H | -3.3149409 | 1.6323515  | 87.1487326 |
| C | -5.4881632 | 0.6167448  | 89.7152795 |
| H | -3.3831964 | 0.4502792  | 89.3456610 |
| H | -6.3505606 | 1.2853320  | 89.5107967 |
| H | -5.4034150 | 0.5052236  | 90.8153678 |
| H | -5.7249687 | -0.3786962 | 89.2856068 |
| C | -5.3480253 | 6.0469556  | 89.9740337 |
| C | -5.5724328 | 6.4085285  | 88.4961142 |
| H | -6.2333488 | 7.2949572  | 88.4050234 |
| H | -6.0535989 | 5.5761616  | 87.9415426 |
| H | -4.6152510 | 6.6367010  | 87.9876405 |
| C | -6.6844719 | 5.7859689  | 90.6942752 |
| H | -4.8688372 | 6.9232287  | 90.4642448 |
| H | -7.3550621 | 6.6670029  | 90.6179402 |
| H | -6.5264256 | 5.5639325  | 91.7689828 |
| H | -7.2143499 | 4.9190661  | 90.2464362 |
| C | -1.1373791 | 4.1398144  | 92.0584342 |
| C | -0.2788098 | 5.3211813  | 91.5771988 |
| H | 0.6306388  | 5.4214588  | 92.2038796 |
| H | -0.8208966 | 6.2883971  | 91.6343462 |
| H | 0.0555725  | 5.1734632  | 90.5339204 |
| C | -1.5387217 | 4.3069795  | 93.5362957 |
| H | -0.5004609 | 3.2356683  | 91.9869555 |
| H | -0.6398875 | 4.4238407  | 94.1763846 |
| H | -2.1123150 | 3.4330052  | 93.9065193 |
| H | -2.1739633 | 5.2064155  | 93.6788707 |
| H | 4.1105158  | 5.2390774  | 83.5079576 |
| H | 6.5485219  | 2.6810546  | 88.3365496 |
| H | 2.3689202  | -0.8789070 | 82.6827698 |
| C | 4.8081030  | 5.0401156  | 84.3519660 |
| H | 4.2149364  | 3.1890551  | 90.4827587 |
| H | 5.0643194  | 7.1908734  | 84.6532114 |
| H | 0.3773668  | 0.7652556  | 82.8055751 |
| C | 4.2836768  | 3.7947477  | 85.0560642 |
| C | 5.9047688  | 1.8484948  | 88.6901792 |
| C | 4.8186441  | 6.2879046  | 85.2486327 |
| H | 5.5826078  | 6.2103467  | 86.0501641 |
| C | 4.5525831  | 3.5361927  | 86.4094000 |
| C | 2.9928362  | -0.1592234 | 83.2530258 |
| H | 6.1855815  | 3.9071735  | 83.0585869 |
| C | 3.5134570  | 2.8539928  | 84.3523007 |
| C | 6.2018564  | 4.7746281  | 83.7492337 |
| H | 6.5687504  | 5.6583431  | 83.1863288 |
| H | 3.2891809  | 3.0499645  | 83.2914320 |
| C | 4.0235284  | 3.4064862  | 89.4115390 |
| H | 6.1594049  | 1.6530430  | 89.7527304 |
| H | 6.1684021  | 0.9464532  | 88.1009798 |
| C | 4.0520861  | 2.4003945  | 87.0692750 |
| C | 1.0717262  | 1.4919894  | 83.2766785 |
| C | 2.9795217  | 1.7043692  | 84.9621491 |
| H | 3.7188873  | -0.7393253 | 83.8573176 |
| H | 3.5759692  | 0.4399081  | 82.5222154 |
| C | 4.4114272  | 2.1978776  | 88.5409504 |
| C | 3.2499127  | 1.4757534  | 86.3419593 |

|    |            |           |            |
|----|------------|-----------|------------|
| C  | 2.1167881  | 0.7553796 | 84.1304755 |
| H  | 2.9517900  | 3.6574501 | 89.2964337 |
| H  | 0.4745575  | 2.1842536 | 83.8959022 |
| H  | 4.6077312  | 4.3121626 | 89.1481425 |
| H  | 3.8367838  | 6.4489201 | 85.7378574 |
| H  | 1.5360197  | 2.0796321 | 82.4573527 |
| H  | 6.9372852  | 4.5514593 | 84.5509373 |
| H  | 3.8417931  | 1.3239905 | 88.9174127 |
| H  | 1.5549147  | 0.1121876 | 84.8380248 |
| H  | 5.1570332  | 4.2534548 | 86.9844697 |
| Zn | 0.4661472  | 5.7501975 | 87.7152189 |
| Br | 2.0104940  | 7.0536628 | 88.8776027 |
| C  | -2.2031667 | 4.2959358 | 78.4982781 |
| C  | -1.8503362 | 4.6289667 | 82.7255201 |
| C  | -1.8157685 | 3.1667388 | 79.2492238 |
| C  | -2.3585932 | 5.6241471 | 80.5229369 |
| C  | -1.9734118 | 4.4928083 | 81.2816967 |
| C  | -2.4741425 | 5.5222427 | 79.1315116 |
| C  | -1.7001696 | 3.2599401 | 80.6376930 |
| O  | -1.5335553 | 3.6750937 | 83.4696814 |
| H  | -2.2921993 | 4.2168518 | 77.4036932 |
| H  | -2.5630103 | 6.5771554 | 81.0365451 |
| H  | -1.6035471 | 2.2147737 | 78.7399048 |
| H  | -2.7734511 | 6.3973821 | 78.5359199 |
| H  | -1.3953182 | 2.3966055 | 81.2483135 |
| Br | 0.8746081  | 5.4587574 | 85.2871767 |
| Zn | -1.1727206 | 4.0054778 | 85.4565615 |
| H  | -0.4192839 | 8.5648197 | 88.0504840 |
| H  | -2.9673944 | 4.2338711 | 87.3588300 |
| C  | -1.6227401 | 6.7014901 | 88.0275435 |
| C  | -1.4419149 | 8.1880931 | 87.8355824 |
| H  | -1.7108468 | 6.2374222 | 89.0237648 |
| C  | -2.1970958 | 6.1801718 | 86.8749249 |
| C  | -2.6994419 | 4.8825032 | 86.5051737 |
| C  | -2.1681946 | 7.2895217 | 85.8502077 |
| O  | -1.7305188 | 8.4300908 | 86.4454761 |
| O  | -2.4901148 | 7.2396058 | 84.6764778 |
| H  | -2.1603850 | 8.7746547 | 88.4515317 |
| H  | -3.5067195 | 4.9568763 | 85.7500122 |
| H  | -2.0524725 | 5.6369092 | 83.1686718 |

### 14ν-2-mi

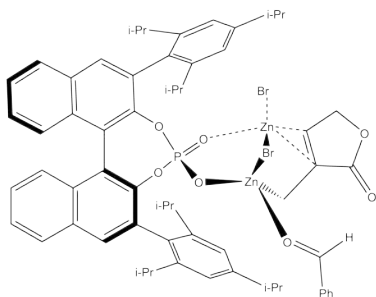

Energy (Hartree) = -11970.03172382

|   |            |            |            |
|---|------------|------------|------------|
| C | -0.8942914 | 1.0108553  | 89.7984155 |
| C | 0.1067666  | 0.0492427  | 89.9805535 |
| C | 0.3203584  | -0.4493830 | 91.3208079 |
| C | 1.4163120  | -1.2950482 | 91.6706111 |
| C | -0.5880564 | -0.0495581 | 92.3701545 |
| C | -0.4099634 | -0.5720232 | 93.6862942 |
| C | -1.6067865 | 0.9063728  | 92.0949012 |
| H | -2.2684684 | 1.2295890  | 92.9131917 |
| C | -1.7422016 | 1.4920750  | 90.8423557 |
| C | 2.6101056  | 0.3120638  | 87.0747899 |
| C | 2.9070450  | -1.0257606 | 86.8460700 |
| H | 3.6862059  | -1.2880069 | 86.1145491 |
| C | 2.2034353  | -2.0751181 | 87.5071962 |
| C | 2.4540357  | -3.4435754 | 87.1892157 |
| C | 1.2045539  | -1.7572108 | 88.5010417 |

|   |            |            |            |
|---|------------|------------|------------|
| C | 0.4641482  | -2.8287804 | 89.0835930 |
| C | 0.9719375  | -0.3736031 | 88.8405655 |
| C | 1.6212383  | 0.5941015  | 88.0675235 |
| O | -1.1399978 | 1.5130326  | 88.5271838 |
| O | 1.3502082  | 1.9387093  | 88.2985513 |
| P | -0.0874528 | 2.5320911  | 87.7938241 |
| O | -0.1606726 | 3.9571433  | 88.3622830 |
| O | -0.3529337 | 2.3409813  | 86.2902476 |
| C | 0.6434065  | -1.4232512 | 93.9809742 |
| C | 1.5730319  | -1.7696703 | 92.9654461 |
| H | -1.1195878 | -0.2662860 | 94.4711927 |
| H | 0.7729677  | -1.8130448 | 95.0020462 |
| H | 2.1525314  | -1.5642088 | 90.9015404 |
| H | 2.4313597  | -2.4151370 | 93.2066654 |
| C | 0.7203113  | -4.1482762 | 88.7371904 |
| C | 1.7332984  | -4.4626793 | 87.7931700 |
| H | -0.3269742 | -2.5962665 | 89.8102049 |
| H | 0.1293535  | -4.9561526 | 89.1950605 |
| H | 1.9341945  | -5.5128870 | 87.5321291 |
| H | 3.2263606  | -3.6737745 | 86.4384684 |
| C | -2.3640329 | 3.9095213  | 91.1705007 |
| C | -2.6652541 | 2.6440612  | 90.5915070 |
| C | -3.2448426 | 4.9839867  | 90.9370058 |
| C | -3.8136113 | 2.4959882  | 89.7652345 |
| C | -4.6521226 | 3.6057161  | 89.5576999 |
| C | -4.3945150 | 4.8595424  | 90.1407723 |
| H | -3.0272970 | 5.9617967  | 91.3979123 |
| C | -4.1875902 | 1.1576782  | 89.1307087 |
| H | -5.5470689 | 3.4809886  | 88.9271359 |
| C | -4.2740511 | 1.2457681  | 87.5963718 |
| H | -5.0731173 | 1.9438665  | 87.2697348 |
| H | -4.5052990 | 0.2512534  | 87.1621949 |
| H | -3.3140247 | 1.5894794  | 87.1644406 |
| C | -5.4882608 | 0.6038616  | 89.7419916 |
| H | -3.3836111 | 0.4333323  | 89.3724520 |
| H | -6.3510569 | 1.2702662  | 89.5324937 |
| H | -5.4030105 | 0.5036746  | 90.8429349 |
| H | -5.7265250 | -0.3956160 | 89.3227233 |
| C | -5.3465706 | 6.0349056  | 89.9529511 |
| C | -5.5737484 | 6.3841247  | 88.4725691 |
| H | -6.2343535 | 7.2699921  | 88.3739814 |
| H | -6.0571790 | 5.5476652  | 87.9263052 |
| H | -4.6175767 | 6.6056868  | 87.9594681 |
| C | -6.6809443 | 5.7809955  | 90.6791261 |
| H | -4.8659567 | 6.9155547  | 90.4343340 |
| H | -7.3524719 | 6.6607952  | 90.5973511 |
| H | -6.5198861 | 5.5673125  | 91.7548420 |
| H | -7.2120987 | 4.9100211  | 90.2411463 |
| C | -1.1291208 | 4.1474875  | 92.0411398 |
| C | -0.2728043 | 5.3244216  | 91.5458126 |
| H | 0.6410042  | 5.4300524  | 92.1648524 |
| H | -0.8125568 | 6.2931478  | 91.5992780 |
| H | 0.0556534  | 5.1700697  | 90.5017562 |
| C | -1.5243530 | 4.3274906  | 93.5190016 |
| H | -0.4923762 | 3.2427849  | 91.9751294 |
| H | -0.6233153 | 4.4510446  | 94.1545122 |
| H | -2.0960852 | 3.4570257  | 93.8999613 |
| H | -2.1600494 | 5.2272324  | 93.6568783 |
| H | 4.0756269  | 5.2118333  | 83.4965687 |
| H | 6.5359870  | 2.6946894  | 88.3315895 |
| H | 2.3766673  | -0.9204289 | 82.7007142 |
| C | 4.7786095  | 5.0196974  | 84.3378865 |
| H | 4.2036678  | 3.2035236  | 90.4813472 |
| H | 5.0285833  | 7.1729555  | 84.6254972 |
| H | 0.3721674  | 0.7091419  | 82.8227213 |
| C | 4.2622790  | 3.7757651  | 85.0503274 |
| C | 5.8973161  | 1.8613610  | 88.6920916 |
| C | 4.7888733  | 6.2725791  | 85.2270594 |
| H | 5.5573512  | 6.2034834  | 86.0249029 |
| C | 4.5309390  | 3.5285934  | 86.4054321 |
| C | 2.9954390  | -0.1933611 | 83.2672250 |

|    |            |            |            |   |            |            |            |
|----|------------|------------|------------|---|------------|------------|------------|
| H  | 6.1538629  | 3.8830765  | 83.0449351 | C | 0.1846397  | 1.7423780  | 89.5056701 |
| C  | 3.4998522  | 2.8246069  | 84.3526843 | C | 1.0088369  | 0.6150148  | 89.5496528 |
| C  | 6.1700130  | 4.7550718  | 83.7296400 | C | 0.7020499  | -0.3947365 | 90.5364941 |
| H  | 6.5321525  | 5.6364145  | 83.1600463 | C | 1.5694693  | -1.4966820 | 90.8021207 |
| H  | 3.2749701  | 3.0121932  | 83.2903801 | C | -0.5088544 | -0.2759371 | 91.3132777 |
| C  | 4.0093350  | 3.4133749  | 89.4092820 | C | -0.8216539 | -1.2823051 | 92.2750441 |
| H  | 6.1562799  | 1.6739747  | 89.7549853 | C | -1.3698436 | 0.8399052  | 91.1062851 |
| H  | 6.1645209  | 0.9577653  | 88.1072305 | H | -2.3252981 | 0.8870366  | 91.6511813 |
| C  | 4.0393729  | 2.3933189  | 87.0722718 | C | -1.0385493 | 1.8663430  | 90.2313570 |
| C  | 1.0612825  | 1.4427501  | 83.2908710 | C | 4.3661713  | 1.3104754  | 87.8095264 |
| C  | 2.9727364  | 1.6761061  | 84.9695843 | C | 4.5332495  | 0.1473053  | 87.0700905 |
| H  | 3.7278817  | -0.7650519 | 83.8716404 | H | 5.4772224  | -0.0142395 | 86.5281205 |
| H  | 3.5732876  | 0.4070889  | 82.5334811 | C | 3.5127457  | -0.8444902 | 86.9898576 |
| C  | 4.4018827  | 2.2021437  | 88.5446698 | C | 3.6610153  | -1.9862996 | 86.1480728 |
| C  | 3.2441606  | 1.4583426  | 86.3507623 | C | 2.3033949  | -0.6945107 | 87.7630313 |
| C  | 2.1149132  | 0.7173187  | 84.1438781 | C | 1.2763522  | -1.6720028 | 87.6125549 |
| H  | 2.9361302  | 3.6582585  | 89.2959436 | C | 2.1602055  | 0.4604169  | 88.6161360 |
| H  | 0.4590217  | 2.1293030  | 83.9111457 | C | 3.1437401  | 1.4435013  | 88.5318718 |
| H  | 4.5865744  | 4.3218920  | 89.1410291 | O | 0.4935002  | 2.7966639  | 88.6399281 |
| H  | 3.8099100  | 6.4351552  | 85.7210461 | O | 2.9854112  | 2.6255691  | 89.2686102 |
| H  | 1.5184217  | 2.0340791  | 82.4700368 | P | 1.8415849  | 3.6921751  | 88.8429054 |
| H  | 6.9098018  | 4.5382391  | 84.5288053 | O | 1.8173198  | 4.7346997  | 89.9826759 |
| H  | 3.8381223  | 1.3270647  | 88.9273066 | O | 2.0250402  | 4.4406418  | 87.4880629 |
| H  | 1.5591173  | 0.0728486  | 84.8549573 | C | 0.0333296  | -2.3515498 | 92.4928441 |
| H  | 5.1277483  | 4.2550656  | 86.9766513 | C | 1.2443791  | -2.4487816 | 91.7579399 |
| Zn | 0.4796635  | 5.7174268  | 87.6737895 | H | -1.7546058 | -1.1845399 | 92.8519997 |
| Br | 1.9905654  | 7.0445935  | 88.8343001 | H | -0.2172181 | -3.1173566 | 93.2425494 |
| C  | -2.1768783 | 4.5075878  | 78.5018197 | H | 2.5134855  | -1.5796619 | 90.2461297 |
| C  | -1.8498101 | 4.6324887  | 82.7442923 | H | 1.9350838  | -3.2837784 | 91.9503902 |
| C  | -1.7904739 | 3.3441158  | 79.1978688 | C | 1.4447860  | -2.7609340 | 86.7690730 |
| C  | -2.3472260 | 5.7324630  | 80.5890248 | C | 2.6509623  | -2.9296681 | 86.0396299 |
| C  | -1.9639143 | 4.5660749  | 81.2921420 | H | 0.3318230  | -1.5438583 | 88.1589792 |
| C  | -2.4546909 | 5.6996911  | 79.1935547 | H | 0.6318243  | -3.4945668 | 86.6584157 |
| C  | -1.6830988 | 3.3683771  | 80.5900098 | H | 2.7748351  | -3.7996419 | 85.3770519 |
| O  | -1.5401295 | 3.6439606  | 83.4425076 | H | 4.5913944  | -2.0933770 | 85.5687718 |
| H  | -2.2591790 | 4.4829256  | 77.4040972 | C | -1.8588060 | 4.2400894  | 90.6424766 |
| H  | -2.5557798 | 6.6568416  | 81.1514001 | C | -1.9581200 | 3.0113878  | 89.9308057 |
| H  | -1.5718200 | 2.4194892  | 78.6427796 | C | -2.7081460 | 5.2956349  | 90.2750984 |
| H  | -2.7526635 | 6.6027149  | 78.6403206 | C | -2.9077252 | 2.8616581  | 88.8869247 |
| H  | -1.3777514 | 2.4789949  | 81.1620325 | C | -3.7322105 | 3.9574677  | 88.5555832 |
| Br | 0.8604258  | 5.4052604  | 85.2449515 | C | -3.6454782 | 5.1851150  | 89.2295957 |
| Zn | -1.1776121 | 3.9508505  | 85.4495993 | H | -2.6382040 | 6.2509096  | 90.8176518 |
| H  | -0.4095912 | 8.5300056  | 87.9695451 | C | -3.0733671 | 1.5485951  | 88.1208429 |
| H  | -2.9796053 | 4.2107034  | 87.3355817 | H | -4.4617499 | 3.8350270  | 87.7413925 |
| C  | -1.6301824 | 6.6813968  | 87.9756595 | C | -2.7136417 | 1.6885286  | 86.6315057 |
| C  | -1.4391014 | 8.1642282  | 87.7663364 | H | -3.3475056 | 2.4479244  | 86.1263177 |
| H  | -1.7018187 | 6.2233180  | 88.9757041 | H | -2.8648304 | 0.7253231  | 86.1023297 |
| C  | -2.2054256 | 6.1506326  | 86.8304221 | H | -1.6508138 | 1.9693409  | 86.4928189 |
| C  | -2.7080692 | 4.8467645  | 86.4734077 | C | -4.4874263 | 0.9707191  | 88.3137370 |
| C  | -2.1823251 | 7.2521451  | 85.7960189 | H | -2.3634626 | 0.8152024  | 88.5538063 |
| O  | -1.7404046 | 8.3973833  | 86.3796923 | H | -5.2642131 | 1.6335031  | 87.8782548 |
| O  | -2.5131551 | 7.1912697  | 84.6257457 | H | -4.7257298 | 0.8389439  | 89.3888206 |
| H  | -2.1451063 | 8.7629264  | 88.3861246 | H | -4.5769800 | -0.0173636 | 87.8171672 |
| H  | -3.5198726 | 4.9184511  | 85.7227009 | C | -4.4920318 | 6.4006007  | 88.8577788 |
| H  | -2.0555020 | 5.6193432  | 83.2331481 | C | -3.6384972 | 7.4469903  | 88.1118355 |
|    |            |            |            | H | -4.2268108 | 8.3634467  | 87.8983297 |
|    |            |            |            | H | -3.2835420 | 7.0342571  | 87.1438683 |
|    |            |            |            | H | -2.7481843 | 7.7418252  | 88.7020659 |
|    |            |            |            | C | -5.7593235 | 6.0655766  | 88.0625105 |
|    |            |            |            | H | -4.8110920 | 6.8645176  | 89.8185881 |
|    |            |            |            | H | -6.3825967 | 6.9721273  | 87.9257407 |
|    |            |            |            | H | -6.3765676 | 5.3001839  | 88.5744435 |
|    |            |            |            | H | -5.5163860 | 5.6825372  | 87.0490787 |
|    |            |            |            | C | -0.8903959 | 4.3933486  | 91.8135094 |
|    |            |            |            | C | -0.3896252 | 5.8304392  | 92.0202830 |
|    |            |            |            | H | 0.4525889  | 5.8398882  | 92.7404515 |
|    |            |            |            | H | -1.1811326 | 6.4899637  | 92.4336997 |
|    |            |            |            | H | -0.0362057 | 6.2747822  | 91.0710783 |
|    |            |            |            | C | -1.5197683 | 3.8534475  | 93.1132771 |
|    |            |            |            | H | -0.0007366 | 3.7697005  | 91.5851064 |
|    |            |            |            | H | -0.8074907 | 3.9402970  | 93.9596678 |

## 6.2 Product Complexes 15

15c-ma

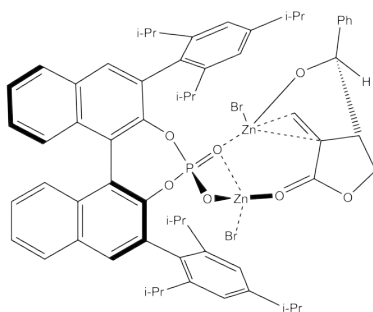

Energy (Hartree) = -11970.02055173

|    |            |            |            |
|----|------------|------------|------------|
| H  | -1.8067864 | 2.7880796  | 93.0206434 |
| H  | -2.4330897 | 4.4286376  | 93.3728197 |
| H  | 8.3886619  | 6.1310943  | 87.7190454 |
| H  | 8.1342572  | 1.2272249  | 90.9122995 |
| H  | 4.8045621  | 2.5991333  | 83.6823885 |
| C  | 8.2218878  | 5.6249905  | 88.6957137 |
| H  | 5.2647211  | 1.1085027  | 92.2876527 |
| H  | 8.1401837  | 7.5383499  | 89.7798722 |
| H  | 3.6916500  | 4.8131812  | 84.4130411 |
| C  | 7.3034907  | 4.4404276  | 88.4235058 |
| C  | 7.3511363  | 0.5521394  | 90.5086146 |
| C  | 7.5157525  | 6.6339194  | 89.6239078 |
| H  | 7.3205572  | 6.1794752  | 90.6181929 |
| C  | 7.1277840  | 3.4080366  | 89.3591614 |
| C  | 5.4472060  | 2.6139107  | 84.5865104 |
| H  | 10.1004775 | 4.4846440  | 88.5888009 |
| C  | 6.5331930  | 4.4001747  | 87.2493143 |
| C  | 9.5963113  | 5.2187985  | 89.2491704 |
| H  | 10.2559149 | 6.1053026  | 89.3466963 |
| H  | 6.6605804  | 5.2091095  | 86.5139453 |
| C  | 5.4502666  | 1.9029107  | 91.5350462 |
| H  | 7.1964415  | -0.2575702 | 91.2515764 |
| H  | 7.7494792  | 0.0959055  | 89.5798629 |
| C  | 6.1996515  | 2.3701887  | 89.1592379 |
| C  | 4.4352872  | 4.8347807  | 85.2350544 |
| C  | 5.5886133  | 3.3885608  | 86.9998253 |
| H  | 5.6393541  | 1.5644121  | 84.8817166 |
| H  | 6.4206906  | 3.0730648  | 84.3145885 |
| C  | 6.0352070  | 1.3038655  | 90.2417518 |
| C  | 5.4200113  | 2.3643371  | 87.9706202 |
| C  | 4.7667901  | 3.4121989  | 85.7141151 |
| H  | 4.4928840  | 2.4233257  | 91.3360994 |
| H  | 4.0258256  | 5.4563851  | 86.0566376 |
| H  | 6.1471062  | 2.6387048  | 91.9885160 |
| H  | 6.5391894  | 6.9529535  | 89.2063680 |
| H  | 5.3318132  | 5.3549910  | 84.8392005 |
| H  | 9.5139997  | 4.7637457  | 90.2583438 |
| H  | 5.3076748  | 0.5539649  | 89.8688424 |
| H  | 3.8089974  | 2.8906077  | 85.9374126 |
| H  | 7.7168116  | 3.4177143  | 90.2897950 |
| Zn | 1.9687372  | 6.3729572  | 88.8774996 |
| Br | 3.4365867  | 8.0085550  | 88.2713794 |
| C  | 2.4453492  | 9.1067469  | 81.2715309 |
| C  | 1.2266990  | 6.6105719  | 84.6095639 |
| C  | 1.6918913  | 7.9404230  | 81.0483960 |
| C  | 2.4423315  | 8.6388204  | 83.6588872 |
| C  | 1.6711978  | 7.4806474  | 83.4417318 |
| C  | 2.8245840  | 9.4515900  | 82.5779876 |
| C  | 1.3097329  | 7.1298828  | 82.1264885 |
| O  | 1.3040578  | 5.2770586  | 84.3078223 |
| H  | 2.7479176  | 9.7398771  | 80.4231900 |
| H  | 2.7660676  | 8.8911270  | 84.6827770 |
| H  | 1.4084254  | 7.6571720  | 80.0226522 |
| H  | 3.4324276  | 10.3517423 | 82.7582708 |
| H  | 0.7477238  | 6.1974476  | 81.9645579 |
| Br | 1.0763839  | 1.6654726  | 85.2949951 |
| Zn | 1.3325278  | 3.9395714  | 85.6269586 |
| H  | 0.2835597  | 9.1346965  | 85.1201640 |
| C  | -0.2984242 | 6.9845956  | 84.9897451 |
| C  | -0.4497208 | 8.4122841  | 85.5249740 |
| C  | -0.6479451 | 6.1770134  | 86.1911949 |
| C  | -1.0233463 | 4.8747304  | 86.3020151 |
| C  | -0.2820577 | 7.0317345  | 87.3379088 |
| O  | -0.1917519 | 8.3057238  | 86.9605047 |
| O  | -0.0116585 | 6.6828774  | 88.5033547 |
| H  | -1.4750543 | 8.8155914  | 85.3980504 |
| H  | -1.3439746 | 4.3040371  | 85.4173619 |
| H  | -1.1461390 | 4.4072954  | 87.2923651 |
| H  | 1.8463805  | 6.9088176  | 85.4994971 |
| H  | -0.9132061 | 6.7791547  | 84.0936480 |

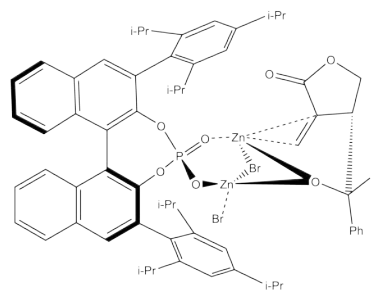

Energy (Hartree) = -11970.05198859

|   |            |            |            |
|---|------------|------------|------------|
| C | 0.0710610  | 1.7252576  | 88.9814183 |
| C | 0.8211198  | 0.8323500  | 89.7569969 |
| C | 0.3075433  | 0.4826386  | 91.0587879 |
| C | 1.0734067  | -0.2478186 | 92.0163012 |
| C | -1.0209040 | 0.9113236  | 91.4255612 |
| C | -1.5406271 | 0.5501758  | 92.7053375 |
| C | -1.7854264 | 1.6892088  | 90.5102364 |
| H | -2.8169896 | 1.9644445  | 90.7782723 |
| C | -1.2566417 | 2.1375028  | 89.3037132 |
| C | 4.2577258  | 0.5255409  | 88.0506097 |
| C | 4.4619722  | -0.8476752 | 88.1027358 |
| H | 5.3885066  | -1.2688278 | 87.6839474 |
| C | 3.4756990  | -1.7361781 | 88.6174385 |
| C | 3.6710428  | -3.1498256 | 88.5789606 |
| C | 2.2305203  | -1.2055301 | 89.1200151 |
| C | 1.2055739  | -2.1320827 | 89.4815499 |
| C | 2.0651630  | 0.2289147  | 89.2013056 |
| C | 3.0693271  | 1.0358734  | 88.6579693 |
| O | 0.5902324  | 2.1936052  | 87.7764044 |
| O | 2.9432945  | 2.4209529  | 88.7465645 |
| P | 1.8647650  | 3.2193223  | 87.8050579 |
| O | 1.5769262  | 4.5405848  | 88.5263796 |
| O | 2.3055350  | 3.2808518  | 86.3238009 |
| C | -0.7763498 | -0.1767962 | 93.6057615 |
| C | 0.5459795  | -0.5659501 | 93.2603415 |
| H | -2.5593193 | 0.8750159  | 92.9693074 |
| H | -1.1858758 | -0.4413065 | 94.5925562 |
| H | 2.1003263  | -0.5470511 | 91.7628577 |
| H | 1.1601464  | -1.1192594 | 93.9871190 |
| C | 1.4186769  | -3.5023225 | 89.4121610 |
| C | 2.6675333  | -4.0200333 | 88.9767424 |
| H | 0.2288610  | -1.7532179 | 89.8107332 |
| H | 0.6082280  | -4.1925233 | 89.6921782 |
| H | 2.8279930  | -5.1081646 | 88.9360215 |
| H | 4.6325573  | -3.5359556 | 88.2056067 |
| C | -2.4762105 | 4.2860691  | 88.7696373 |
| C | -2.0548587 | 2.9866554  | 88.3650548 |
| C | -3.3272525 | 5.0164002  | 87.9203772 |
| C | -2.4339837 | 2.4855622  | 87.0868116 |
| C | -3.2585227 | 3.2757493  | 86.2635974 |
| C | -3.7369974 | 4.5336886  | 86.6645309 |
| H | -3.6660468 | 6.0157179  | 88.2401647 |
| C | -2.0155326 | 1.1085694  | 86.5711355 |
| H | -3.5449977 | 2.8791327  | 85.2782196 |
| C | -1.1757884 | 1.2150279  | 85.2841247 |
| H | -1.7500412 | 1.6730449  | 84.4521564 |
| H | -0.8491901 | 0.2090347  | 84.9482876 |
| H | -0.2689120 | 1.8274211  | 85.4463584 |
| C | -3.2375655 | 0.1903152  | 86.3794860 |
| H | -1.3786921 | 0.6295148  | 87.3413009 |
| H | -3.9212665 | 0.5790036  | 85.5961362 |
| H | -3.8208639 | 0.0945448  | 87.3179921 |
| H | -2.9166989 | -0.8254049 | 86.0683623 |
| C | -4.6941372 | 5.3536136  | 85.8055237 |
| C | -4.5130264 | 5.1350853  | 84.2966178 |
| H | -5.1089162 | 5.8718174  | 83.7211148 |

$P_{fav.} = 15\gamma\text{-ma}$ ; COSMO

|    |            |            |            |    |            |           |            |
|----|------------|------------|------------|----|------------|-----------|------------|
| H  | -4.8540203 | 4.1258315  | 83.9855243 | Zn | 3.1698598  | 4.9288948 | 85.7240879 |
| H  | -3.4515083 | 5.2302372  | 83.9902950 | H  | -1.4306411 | 6.4007266 | 83.9200895 |
| C  | -6.1529324 | 5.0910060  | 86.2300935 | C  | 0.7929088  | 6.4243971 | 84.0257060 |
| H  | -4.4792310 | 6.4252142  | 86.0196370 | C  | -0.5419938 | 6.1066052 | 83.3319659 |
| H  | -6.8571513 | 5.7248795  | 85.6520162 | C  | 1.6356710  | 5.2836538 | 83.5818792 |
| H  | -6.3034397 | 5.3014155  | 87.3080169 | C  | 2.9998956  | 5.1729688 | 83.4968915 |
| H  | -6.4228593 | 4.0286822  | 86.0538458 | C  | 0.6920800  | 4.1536429 | 83.2246969 |
| C  | -1.9932086 | 4.9395625  | 90.0638829 | O  | -0.5679552 | 4.6688277 | 83.1736739 |
| C  | -1.2661335 | 6.2654104  | 89.7819983 | O  | 0.9522842  | 2.9949390 | 82.9968849 |
| H  | -0.8082758 | 6.6703004  | 90.7067267 | H  | -0.6058665 | 6.5745993 | 82.3286809 |
| H  | -1.9463653 | 7.0420070  | 89.3757144 | H  | 3.4352348  | 4.2397396 | 83.0992294 |
| H  | -0.4491953 | 6.1237154  | 89.0493726 | H  | 3.6382834  | 6.0722282 | 83.5530645 |
| C  | -3.1376575 | 5.1340252  | 91.0741405 | H  | 1.2134597  | 7.4112323 | 83.7550392 |
| H  | -1.2489551 | 4.2594771  | 90.5244348 | H  | 0.0376786  | 5.4986475 | 85.8734987 |
| H  | -2.7567065 | 5.5799113  | 92.0160133 |    |            |           |            |
| H  | -3.6320584 | 4.1734882  | 91.3252936 |    |            |           |            |
| H  | -3.9172031 | 5.8150418  | 90.6723462 |    |            |           |            |
| H  | 8.2982786  | 3.5047957  | 84.3039272 |    |            |           |            |
| H  | 8.3750963  | 2.4578532  | 89.6363230 |    |            |           |            |
| H  | 4.3869369  | -1.4084948 | 84.0285255 |    |            |           |            |
| C  | 7.7377909  | 4.1526738  | 85.0173523 |    |            |           |            |
| H  | 5.8820631  | 3.5625021  | 91.2570522 |    |            |           |            |
| H  | 7.5191721  | 5.7379686  | 83.5109040 |    |            |           |            |
| H  | 2.7715168  | 0.4812522  | 83.4591246 |    |            |           |            |
| C  | 6.8641571  | 3.2114104  | 85.8481713 |    |            |           |            |
| C  | 7.5690699  | 1.7680876  | 89.9637156 |    |            |           |            |
| C  | 6.8795316  | 5.1145203  | 84.1688284 |    |            |           |            |
| H  | 6.2953314  | 5.7947474  | 84.8232363 |    |            |           |            |
| C  | 6.9064835  | 3.1571980  | 87.2505476 |    |            |           |            |
| C  | 5.0431977  | -0.6892954 | 84.5610977 |    |            |           |            |
| H  | 9.4315082  | 4.2691693  | 86.4203360 |    |            |           |            |
| C  | 5.9662671  | 2.3465717  | 85.1898281 |    |            |           |            |
| C  | 8.7682245  | 4.9381814  | 85.8361937 |    |            |           |            |
| H  | 9.4084798  | 5.5483392  | 85.1678711 |    |            |           |            |
| H  | 5.9382014  | 2.3493010  | 84.0882499 |    |            |           |            |
| C  | 5.8428527  | 3.6308719  | 90.1502046 |    |            |           |            |
| H  | 7.6210211  | 1.6940470  | 91.0697325 |    |            |           |            |
| H  | 7.7906496  | 0.7670675  | 89.5404906 |    |            |           |            |
| C  | 6.0764313  | 2.2934417  | 87.9937505 |    |            |           |            |
| C  | 3.4654560  | 1.1944040  | 83.9481767 |    |            |           |            |
| C  | 5.1249811  | 1.4577294  | 85.8810993 |    |            |           |            |
| H  | 5.5558005  | -1.2340991 | 85.3786348 |    |            |           |            |
| H  | 5.8235330  | -0.3481121 | 83.8484620 |    |            |           |            |
| C  | 6.1839037  | 2.2713784  | 89.5166365 |    |            |           |            |
| C  | 5.1792044  | 1.4405984  | 87.3057451 |    |            |           |            |
| C  | 4.2267234  | 0.5069405  | 85.0895166 |    |            |           |            |
| H  | 4.8276818  | 3.9615818  | 89.8579140 |    |            |           |            |
| H  | 2.8535273  | 2.0332150  | 84.3244766 |    |            |           |            |
| H  | 6.5581988  | 4.4197226  | 89.8374584 |    |            |           |            |
| H  | 6.1668926  | 4.5671218  | 83.5191938 |    |            |           |            |
| H  | 4.1458067  | 1.5735950  | 83.1561410 |    |            |           |            |
| H  | 8.2727184  | 5.6327485  | 86.5465452 |    |            |           |            |
| H  | 5.4380558  | 1.5389634  | 89.8897162 |    |            |           |            |
| H  | 3.4628864  | 0.1099273  | 85.7888854 |    |            |           |            |
| H  | 7.5956857  | 3.8145040  | 87.7993701 |    |            |           |            |
| Zn | 2.2827561  | 6.4010523  | 88.1584585 |    |            |           |            |
| Br | 2.0948731  | 8.1236016  | 89.6794065 |    |            |           |            |
| C  | -1.5841864 | 9.9218987  | 86.8911840 |    |            |           |            |
| C  | 0.6275505  | 6.4155904  | 85.6197605 |    |            |           |            |
| C  | -0.1999909 | 10.0033565 | 86.6582771 |    |            |           |            |
| C  | -1.5332678 | 7.5610947  | 86.3112740 |    |            |           |            |
| C  | -0.1512413 | 7.6409441  | 86.0630111 |    |            |           |            |
| C  | -2.2494401 | 8.6975745  | 86.7193494 |    |            |           |            |
| C  | 0.5132501  | 8.8703681  | 86.2426901 |    |            |           |            |
| O  | 1.8998594  | 6.3934807  | 86.1800757 |    |            |           |            |
| H  | -2.1413616 | 10.8118734 | 87.2218611 |    |            |           |            |
| H  | -2.0428239 | 6.5895826  | 86.2268200 |    |            |           |            |
| H  | 0.3305138  | 10.9549434 | 86.8145547 |    |            |           |            |
| H  | -3.3292759 | 8.6200752  | 86.9216256 |    |            |           |            |
| H  | 1.6016622  | 8.9213888  | 86.0872717 |    |            |           |            |
| Br | 4.7200965  | 5.8727802  | 87.3161118 |    |            |           |            |

$P_{fav.} = 15\gamma\text{-ma}$

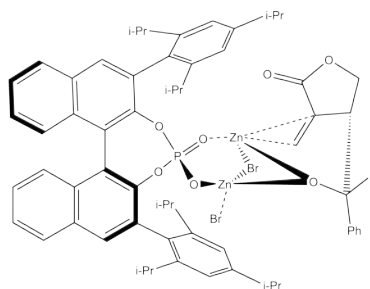

Energy (Hartree) = -11970.03893777

|   |            |            |            |
|---|------------|------------|------------|
| C | 0.0741547  | 1.7316346  | 88.9774075 |
| C | 0.8218860  | 0.8361411  | 89.7521165 |
| C | 0.3084156  | 0.4881417  | 91.0542546 |
| C | 1.0723092  | -0.2457911 | 92.0102852 |
| C | -1.0176199 | 0.9218723  | 91.4230628 |
| C | -1.5360896 | 0.5623952  | 92.7032718 |
| C | -1.7801519 | 1.7019970  | 90.5084301 |
| H | -2.8104748 | 1.9818887  | 90.7762966 |
| C | -1.2518351 | 2.1477282  | 89.3010946 |
| C | 4.2560621  | 0.5219146  | 88.0430222 |
| C | 4.4559925  | -0.8518185 | 88.0932722 |
| H | 5.3812069  | -1.2735852 | 87.6721560 |
| C | 3.4686777  | -1.7385089 | 88.6082456 |
| C | 3.6598033  | -3.1522033 | 88.5691007 |
| C | 2.2259343  | -1.2050358 | 89.1133723 |
| C | 1.1999197  | -2.1291794 | 89.4771113 |
| C | 2.0639220  | 0.2296448  | 89.1953849 |
| C | 3.0692938  | 1.0348856  | 88.6515418 |
| O | 0.5928664  | 2.1990426  | 87.7722988 |
| O | 2.9472537  | 2.4191960  | 88.7402809 |
| P | 1.8706370  | 3.2214159  | 87.8007707 |
| O | 1.5885096  | 4.5456599  | 88.5153068 |
| O | 2.3119923  | 3.2781101  | 86.3179107 |
| C | -0.7740988 | -0.1680315 | 93.6020043 |
| C | 0.5454088  | -0.5625841 | 93.2543796 |
| H | -2.5527318 | 0.8921293  | 92.9690036 |
| H | -1.1833031 | -0.4308500 | 94.5893201 |
| H | 2.0972505  | -0.5488553 | 91.7539318 |
| H | 1.1584000  | -1.1189223 | 93.9797448 |
| C | 1.4098687  | -3.4994468 | 89.4075685 |
| C | 2.6557927  | -4.0199499 | 88.9690740 |
| H | 0.2254577  | -1.7470424 | 89.8088875 |
| H | 0.5985487  | -4.1875807 | 89.6899289 |
| H | 2.8137851  | -5.1083615 | 88.9277356 |
| H | 4.6194332  | -3.5404575 | 88.1931335 |
| C | -2.4660999 | 4.2975938  | 88.7619868 |
| C | -2.0506944 | 2.9952882  | 88.3616681 |
| C | -3.3228545 | 5.0235208  | 87.9150122 |



|   |            |            |            |    |            |            |            |
|---|------------|------------|------------|----|------------|------------|------------|
| C | -2.4374777 | 2.4879628  | 87.0884047 | H  | 3.4781972  | 0.0957589  | 85.7762496 |
| C | -3.2670830 | 3.2743031  | 86.2670871 | H  | 7.5887294  | 3.8153011  | 87.8036255 |
| C | -3.7428966 | 4.5336898  | 86.6657258 | Zn | 2.2903684  | 6.4149666  | 88.1795746 |
| H | -3.6568071 | 6.0254493  | 88.2316158 | Br | 2.1006668  | 8.1507503  | 89.6698277 |
| C | -2.0204897 | 1.1094521  | 86.5757768 | C  | -1.6157108 | 9.9027125  | 86.8987791 |
| H | -3.5595938 | 2.8728913  | 85.2854443 | C  | 0.6253530  | 6.4124541  | 85.6345267 |
| C | -1.1834960 | 1.2122087  | 85.2866874 | C  | -0.2254025 | 9.9831123  | 86.7115700 |
| H | -1.7573477 | 1.6692702  | 84.4540358 | C  | -1.5533767 | 7.5520140  | 86.2816347 |
| H | -0.8583683 | 0.2057206  | 84.9514369 | C  | -0.1641734 | 7.6321293  | 86.0758418 |
| H | -0.2752303 | 1.8233210  | 85.4456318 | C  | -2.2782898 | 8.6838603  | 86.6855494 |
| C | -3.2427568 | 0.1905515  | 86.3901605 | C  | 0.4971986  | 8.8558173  | 86.2977433 |
| H | -1.3821172 | 0.6326481  | 87.3460739 | O  | 1.8973769  | 6.3993809  | 86.1892451 |
| H | -3.9285761 | 0.5754951  | 85.6069333 | H  | -2.1800599 | 10.7881184 | 87.2292592 |
| H | -3.8245450 | 0.0984153  | 87.3297795 | H  | -2.0621046 | 6.5826163  | 86.1717570 |
| H | -2.9229253 | -0.8262394 | 86.0818267 | H  | 0.3043163  | 10.9276640 | 86.9067832 |
| C | -4.7091774 | 5.3468892  | 85.8105083 | H  | -3.3637406 | 8.6053778  | 86.8546417 |
| C | -4.5312950 | 5.1308182  | 84.3007477 | H  | 1.5905034  | 8.9042213  | 86.1829402 |
| H | -5.1334305 | 5.8635140  | 83.7264751 | Br | 4.7352327  | 5.8923368  | 87.3029613 |
| H | -4.8674127 | 4.1199714  | 83.9899391 | Zn | 3.1723339  | 4.9355170  | 85.7483183 |
| H | -3.4712476 | 5.2304388  | 83.9908723 | H  | -1.4345741 | 6.3903496  | 83.9298316 |
| C | -6.1643503 | 5.0731764  | 86.2397405 | C  | 0.7879578  | 6.4264351  | 84.0364337 |
| H | -4.5010982 | 6.4201614  | 86.0239956 | C  | -0.5448659 | 6.1002039  | 83.3413563 |
| H | -6.8768528 | 5.7009048  | 85.6650347 | C  | 1.6379652  | 5.2936377  | 83.5891641 |
| H | -6.3122436 | 5.2805855  | 87.3184150 | C  | 3.0026415  | 5.1877439  | 83.5114345 |
| H | -6.4260751 | 4.0087596  | 86.0650161 | C  | 0.7025862  | 4.1565766  | 83.2302636 |
| C | -1.9695644 | 4.9579995  | 90.0475664 | O  | -0.5631894 | 4.6659745  | 83.1794574 |
| C | -1.2467500 | 6.2830331  | 89.7519127 | O  | 0.9717745  | 3.0020116  | 83.0013031 |
| H | -0.7730260 | 6.6913759  | 90.6666723 | H  | -0.6117648 | 6.5727492  | 82.3391176 |
| H | -1.9313081 | 7.0597400  | 89.3532761 | H  | 3.4421378  | 4.2536853  | 83.1203119 |
| H | -0.4402220 | 6.1390414  | 89.0085372 | H  | 3.6412152  | 6.0858582  | 83.5766635 |
| C | -3.1028665 | 5.1564564  | 91.0693508 | H  | 1.1997352  | 7.4194869  | 83.7741173 |
| H | -1.2196332 | 4.2806019  | 90.5029292 | H  | 0.0415575  | 5.4904526  | 85.8845457 |
| H | -2.7123124 | 5.6082234  | 92.0042873 |    |            |            |            |
| H | -3.5942165 | 4.1973900  | 91.3316275 |    |            |            |            |
| H | -3.8880284 | 5.8342101  | 90.6731534 |    |            |            |            |
| H | 8.3178967  | 3.4918546  | 84.3126321 |    |            |            |            |
| H | 8.3610812  | 2.4608172  | 89.6464836 |    |            |            |            |
| H | 4.4061030  | -1.4119331 | 84.0083443 |    |            |            |            |
| C | 7.7532326  | 4.1411769  | 85.0215769 |    |            |            |            |
| H | 5.8602047  | 3.5721366  | 91.2507504 |    |            |            |            |
| H | 7.5418431  | 5.7255918  | 83.5118416 |    |            |            |            |
| H | 2.7837639  | 0.4815004  | 83.4490682 |    |            |            |            |
| C | 6.8747790  | 3.2018794  | 85.8494978 |    |            |            |            |
| C | 7.5527691  | 1.7727544  | 89.9714596 |    |            |            |            |
| C | 6.8995981  | 5.1023382  | 84.1675381 |    |            |            |            |
| H | 6.3122040  | 5.7821040  | 84.8194478 |    |            |            |            |
| C | 6.9055229  | 3.1542687  | 87.2520194 |    |            |            |            |
| C | 5.0602448  | -0.6945421 | 84.5457000 |    |            |            |            |
| H | 9.4383057  | 4.2607415  | 86.4337138 |    |            |            |            |
| C | 5.9839515  | 2.3330118  | 85.1881706 |    |            |            |            |
| C | 8.7788532  | 4.9287183  | 85.8443375 |    |            |            |            |
| H | 9.4237101  | 5.5376403  | 85.1793730 |    |            |            |            |
| H | 5.9648137  | 2.3300975  | 84.0863099 |    |            |            |            |
| C | 5.8255089  | 3.6364581  | 90.1436371 |    |            |            |            |
| H | 7.5996409  | 1.7018662  | 91.0778383 |    |            |            |            |
| H | 7.7768353  | 0.7709350  | 89.5518964 |    |            |            |            |
| C | 6.0718492  | 2.2921101  | 87.9922657 |    |            |            |            |
| C | 3.4794077  | 1.1901071  | 83.9418592 |    |            |            |            |
| C | 5.1372311  | 1.4470717  | 85.8759486 |    |            |            |            |
| H | 5.5727484  | -1.2429754 | 85.3607956 |    |            |            |            |
| H | 5.8418116  | -0.3495927 | 83.8364071 |    |            |            |            |
| C | 6.1701916  | 2.2753465  | 89.5158497 |    |            |            |            |
| C | 5.1810541  | 1.4352508  | 87.3007877 |    |            |            |            |
| C | 4.2418332  | 0.4975879  | 85.0795269 |    |            |            |            |
| H | 4.8111019  | 3.9656122  | 89.8479064 |    |            |            |            |
| H | 2.8684319  | 2.0275853  | 84.3226194 |    |            |            |            |
| H | 6.5409479  | 4.4255975  | 89.8322129 |    |            |            |            |
| H | 6.1899357  | 4.5536620  | 83.5154806 |    |            |            |            |
| H | 4.1589703  | 1.5720169  | 83.1502208 |    |            |            |            |
| H | 8.2790085  | 5.6248727  | 86.5498216 |    |            |            |            |
| H | 5.4224327  | 1.5438880  | 89.8868845 |    |            |            |            |

### 15λ-ma

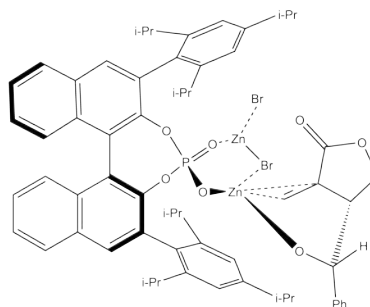

Energy (Hartree) = -11970.02236654

|   |            |            |            |
|---|------------|------------|------------|
| C | -0.2714446 | 1.1450265  | 89.0034699 |
| C | 0.4785446  | -0.0041182 | 89.2716328 |
| C | 0.0158524  | -0.8646863 | 90.3362832 |
| C | 0.7824661  | -1.9634179 | 90.8277572 |
| C | -1.2557151 | -0.5856721 | 90.9610965 |
| C | -1.7287016 | -1.4503056 | 91.9929446 |
| C | -2.0080273 | 0.5559168  | 90.5579315 |
| H | -2.9937419 | 0.7308159  | 91.0147637 |
| C | -1.5242673 | 1.4556441  | 89.6179444 |
| C | 3.9614929  | 0.4841312  | 87.6943825 |
| C | 4.2074007  | -0.7785105 | 87.1728647 |
| H | 5.1750503  | -0.9857191 | 86.6905103 |
| C | 3.2161603  | -1.8039877 | 87.1987888 |
| C | 3.4498307  | -3.0657011 | 86.5744576 |
| C | 1.9367822  | -1.5551582 | 87.8227720 |
| C | 0.9307117  | -2.5620520 | 87.7241828 |
| C | 1.7180175  | -0.2937326 | 88.4934471 |
| C | 2.7114351  | 0.6788663  | 88.3639828 |
| O | 0.1911303  | 2.0531018  | 88.0416732 |
| O | 2.5411709  | 1.9143683  | 88.9806776 |
| P | 1.4359606  | 3.0061832  | 88.5096964 |
| O | 1.1103845  | 3.7854486  | 89.7977724 |

|   |            |            |            |    |            |           |            |
|---|------------|------------|------------|----|------------|-----------|------------|
| O | 1.8448931  | 3.8439860  | 87.2859737 | H  | 7.2102187  | 0.4988673 | 89.5313369 |
| C | -0.9707339 | -2.5270727 | 92.4265293 | C  | 5.3498233  | 2.3434699 | 88.6837452 |
| C | 0.3020949  | -2.7728019 | 91.8477707 | C  | 2.8325211  | 1.9197379 | 84.8316377 |
| H | -2.7063194 | -1.2334204 | 92.4515266 | C  | 4.8924156  | 2.3265807 | 86.2577740 |
| H | -1.3451508 | -3.1808799 | 93.2287951 | H  | 6.1920379  | 1.9639544 | 83.8281183 |
| H | 1.7733399  | -2.1595625 | 90.3957859 | H  | 4.8957835  | 3.1395266 | 83.4361489 |
| H | 0.9172919  | -3.6087443 | 92.2140226 | C  | 5.4021300  | 1.6468583 | 90.0423009 |
| C | 1.1848150  | -3.7709320 | 87.0907414 | C  | 4.8229495  | 1.6942342 | 87.5322919 |
| C | 2.4595602  | -4.0350757 | 86.5249347 | C  | 4.3448707  | 1.6665948 | 84.9874803 |
| H | -0.0629285 | -2.3681141 | 88.1510259 | H  | 3.8306676  | 2.8687179 | 90.9787362 |
| H | 0.3884699  | -4.5277270 | 87.0233608 | H  | 2.2485813  | 1.5081290 | 85.6778879 |
| H | 2.6537032  | -5.0005644 | 86.0335400 | H  | 5.4884549  | 3.3990687 | 91.3866540 |
| H | 4.4336984  | -3.2476523 | 86.1141294 | H  | 3.9353678  | 6.2623608 | 87.2368403 |
| C | -2.2570995 | 3.8711115  | 89.9548710 | H  | 2.6296276  | 3.0076221 | 84.7936065 |
| C | -2.2558429 | 2.6837869  | 89.1686809 | H  | 7.2872207  | 6.1064385 | 89.0803818 |
| C | -2.8638002 | 5.0244163  | 89.4258305 | H  | 4.7678396  | 0.7376990 | 89.9793132 |
| C | -2.8701103 | 2.6775105  | 87.8890463 | H  | 4.4777923  | 0.5710489 | 85.0958979 |
| C | -3.4447715 | 3.8645388  | 87.3991738 | H  | 6.2025553  | 4.1705965 | 89.4630851 |
| C | -3.4454181 | 5.0532371  | 88.1439329 | Zn | 1.6880932  | 5.5513212 | 90.3065932 |
| H | -2.8704744 | 5.9512537  | 90.0217238 | Br | 3.1202210  | 6.2244953 | 91.9439863 |
| C | -2.9279801 | 1.4165394  | 87.0298616 | C  | -3.6901324 | 3.3288027 | 81.9360148 |
| H | -3.8869262 | 3.8554937  | 86.3924322 | C  | -0.1995989 | 4.5734475 | 84.2092287 |
| C | -2.2436895 | 1.6187868  | 85.6693394 | C  | -3.7257230 | 4.4998100 | 82.7138779 |
| H | -2.7963164 | 2.3444323  | 85.0406323 | C  | -1.3864008 | 2.9594716 | 82.6249421 |
| H | -2.1943007 | 0.6641030  | 85.1061276 | C  | -1.4124470 | 4.1344991 | 83.3988244 |
| H | -1.2135719 | 2.0046930  | 85.7969435 | C  | -2.5168314 | 2.5602841 | 81.8924615 |
| C | -4.3791106 | 0.9282544  | 86.8656824 | C  | -2.5938488 | 4.9001172 | 83.4380698 |
| H | -2.3784637 | 0.6154365  | 87.5647605 | O  | -0.5747367 | 5.0875395 | 85.4268590 |
| H | -4.9969780 | 1.6773470  | 86.3277296 | H  | -4.5805451 | 3.0116395 | 81.3718584 |
| H | -4.8570872 | 0.7422046  | 87.8489376 | H  | -0.4848298 | 2.3251370 | 82.6289316 |
| H | -4.4124514 | -0.0149150 | 86.2817317 | H  | -4.6469511 | 5.1014044 | 82.7628215 |
| C | -3.9813698 | 6.3670728  | 87.5841811 | H  | -2.4851175 | 1.6327812 | 81.3003261 |
| C | -2.8150530 | 7.2220355  | 87.0443695 | H  | -2.6224279 | 5.7993351 | 84.0713812 |
| H | -3.1848966 | 8.1833379  | 86.6299309 | Br | 0.8516102  | 7.0305121 | 88.5087485 |
| H | -2.2651509 | 6.6746429  | 86.2497012 | Zn | 0.8067060  | 5.4020467 | 86.6604625 |
| H | -2.0841727 | 7.4538210  | 87.8447288 | H  | 0.9419617  | 4.0584662 | 81.8347248 |
| C | -5.0730597 | 6.1917638  | 86.5199943 | C  | 0.6080512  | 5.6709434 | 83.3350681 |
| H | -4.4323947 | 6.9190566  | 88.4397312 | C  | 1.3370650  | 5.0493759 | 82.1287115 |
| H | -5.4995874 | 7.1755095  | 86.2374940 | C  | 1.7314239  | 6.2422435 | 84.1155595 |
| H | -5.9009154 | 5.5492443  | 86.8822921 | C  | 1.6981222  | 7.1240394 | 85.1558458 |
| H | -4.6707480 | 5.7319711  | 85.5935334 | C  | 3.0066844  | 5.6203140 | 83.6264881 |
| C | -1.6164715 | 3.9088144  | 91.3423728 | O  | 2.7157818  | 4.8743747 | 82.5222052 |
| C | -0.9579788 | 5.2598972  | 91.6737027 | O  | 4.1260016  | 5.7299724 | 84.0795161 |
| H | -0.2073045 | 5.1559096  | 92.4832203 | H  | 1.3101168  | 5.7138579 | 81.2399109 |
| H | -1.6903479 | 6.0245743  | 92.0059682 | H  | 2.6410376  | 7.4327707 | 85.6364760 |
| H | -0.4789474 | 5.7004041  | 90.7700933 | H  | 0.7779051  | 7.6794167 | 85.3947713 |
| C | -2.6295651 | 3.5459561  | 92.4454602 | H  | -0.1441968 | 6.4297782 | 83.0458210 |
| H | -0.8137953 | 3.1437300  | 91.3463773 | H  | 0.4935796  | 3.6955396 | 84.2946917 |
| H | -2.1487063 | 3.5613638  | 93.4456158 |    |            |           |            |
| H | -3.0587638 | 2.5375496  | 92.2917851 |    |            |           |            |
| H | -3.4712487 | 4.2695723  | 92.4574960 |    |            |           |            |
| H | 6.1956486  | 6.0880326  | 86.1778752 |    |            |           |            |
| H | 7.5361012  | 2.0298995  | 90.3989323 |    |            |           |            |
| H | 4.7692572  | 1.4579173  | 82.8580033 |    |            |           |            |
| C | 6.0853760  | 5.8365593  | 87.2546052 |    |            |           |            |
| H | 4.8222002  | 1.9228231  | 92.1337867 |    |            |           |            |
| H | 4.9516139  | 7.6915560  | 87.6366324 |    |            |           |            |
| H | 2.4502863  | 1.4594660  | 83.8964708 |    |            |           |            |
| C | 5.8091438  | 4.3416985  | 87.3362767 |    |            |           |            |
| C | 6.8384842  | 1.1688503  | 90.3328448 |    |            |           |            |
| C | 4.8458625  | 6.5949819  | 87.7741510 |    |            |           |            |
| H | 4.6805148  | 6.4047754  | 88.8564455 |    |            |           |            |
| C | 5.8366186  | 3.6550895  | 88.5618732 |    |            |           |            |
| C | 5.0960470  | 2.0847560  | 83.7128321 |    |            |           |            |
| H | 8.2499546  | 5.7263602  | 87.6169429 |    |            |           |            |
| C | 5.3891746  | 3.6409316  | 86.1935257 |    |            |           |            |
| C | 7.3614062  | 6.2771378  | 87.9861139 |    |            |           |            |
| H | 7.5433847  | 7.3615058  | 87.8387064 |    |            |           |            |
| H | 5.3887151  | 4.1700684  | 85.2306634 |    |            |           |            |
| C | 4.8554816  | 2.5090122  | 91.1925758 |    |            |           |            |
| H | 6.8866665  | 0.6179976  | 91.2953126 |    |            |           |            |

### 15*ν*-ma; COSMO

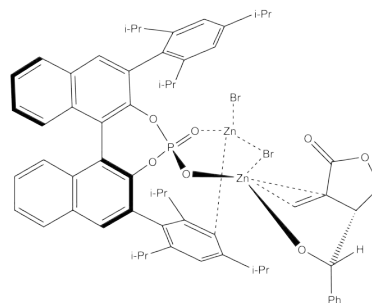

Energy (Hartree) = -11970.04112056

|   |           |           |           |
|---|-----------|-----------|-----------|
| C | 0.8650789 | 2.4117922 | 1.7050395 |
| C | 2.2317287 | 2.2128269 | 1.9173760 |
| C | 3.0580983 | 3.3721025 | 2.1655375 |
| C | 4.4833606 | 3.3123360 | 2.2312898 |
| C | 2.4256387 | 4.6598759 | 2.3267679 |
| C | 3.2266435 | 5.8026953 | 2.6267877 |
| C | 1.0231721 | 4.7842469 | 2.1150306 |

|   |            |            |            |    |            |            |            |
|---|------------|------------|------------|----|------------|------------|------------|
| H | 0.5589760  | 5.7780438  | 2.2051450  | H  | 1.5569698  | -3.5284241 | -6.7282705 |
| C | 0.2438955  | 3.6973613  | 1.7412221  | H  | -0.1709644 | -4.3770843 | 0.9560613  |
| C | 3.2828913  | -1.1135688 | 0.3365133  | C  | 2.7283456  | -3.1396445 | -3.4560089 |
| C | 4.1795841  | -1.5897556 | 1.2868230  | C  | 5.7656580  | -0.0393988 | -2.6454910 |
| H | 4.7578717  | -2.4997272 | 1.0663418  | C  | 1.7575884  | -2.9692352 | -5.7906536 |
| C | 4.3545773  | -0.9522254 | 2.5479518  | H  | 2.3396118  | -2.0636808 | -6.0631933 |
| C | 5.2035347  | -1.5111901 | 3.5502682  | C  | 3.3911900  | -1.9021092 | -3.3834238 |
| C | 3.6543366  | 0.2783705  | 2.8244133  | C  | 2.6346097  | -4.8532109 | 0.7560865  |
| C | 3.7973202  | 0.8644977  | 4.1179927  | H  | 4.3850770  | -5.0157080 | -4.6602203 |
| C | 2.8149594  | 0.8492485  | 1.7995086  | C  | 2.2449768  | -3.6952267 | -2.2608905 |
| C | 2.5874266  | 0.0951311  | 0.6417274  | C  | 3.8562544  | -4.3479774 | -5.3705506 |
| O | 0.0418353  | 1.3075650  | 1.4934542  | H  | 3.6918487  | -4.9092867 | -6.3139682 |
| O | 1.6843924  | 0.5680027  | -0.3183132 | H  | 1.7012000  | -4.6506916 | -2.3132220 |
| P | 0.0918949  | 0.5035172  | 0.0545228  | C  | 3.5559530  | 1.1767278  | -3.0075943 |
| O | -0.6454772 | 1.2662586  | -1.0549870 | H  | 6.3040049  | 0.9298720  | -2.5940464 |
| O | -0.3626787 | -0.9345654 | 0.3617882  | H  | 6.3124638  | -0.7707908 | -2.0160954 |
| C | 4.6059841  | 5.7000363  | 2.7226427  | C  | 3.5735082  | -1.2195208 | -2.1681456 |
| C | 5.2366242  | 4.4463574  | 2.5028161  | C  | 0.3297214  | -4.1407518 | -0.0048044 |
| H | 2.7261336  | 6.7745854  | 2.7605166  | C  | 2.3902957  | -3.0514958 | -1.0187189 |
| H | 5.2141645  | 6.5893456  | 2.9474664  | H  | 3.6649003  | -4.5298867 | 1.0053585  |
| H | 4.9902677  | 2.3541188  | 2.0552212  | H  | 2.7125870  | -5.6577037 | -0.0052624 |
| H | 6.3341032  | 4.3725077  | 2.5423065  | C  | 4.3079823  | 0.1206428  | -2.1760842 |
| C | 4.6159576  | 0.2854106  | 5.0780466  | C  | 3.0747026  | -1.8065933 | -0.9721312 |
| C | 5.3369930  | -0.9047201 | 4.7903754  | C  | 1.7797248  | -3.6858123 | 0.2301357  |
| H | 3.2378918  | 1.7802841  | 4.3558820  | H  | 2.5186168  | 1.3037452  | -2.6405029 |
| H | 4.7021746  | 0.7496901  | 6.0723107  | H  | -0.2463464 | -3.3396159 | -0.5058478 |
| H | 5.9887415  | -1.3501448 | 5.5573377  | H  | 3.5097173  | 0.8912841  | -4.0793678 |
| H | 5.7407502  | -2.4451908 | 3.3224308  | H  | 0.7892904  | -2.6462703 | -5.3622238 |
| C | -1.4395746 | 4.1340028  | -0.0730239 | H  | 0.2719037  | -5.0430138 | -0.6479089 |
| C | -1.1788455 | 3.8364471  | 1.2984494  | H  | 4.5337177  | -3.4982268 | -5.5998432 |
| C | -2.7900684 | 4.1471385  | -0.5103233 | H  | 4.3486755  | 0.4940843  | -1.1324004 |
| C | -2.2489816 | 3.6426737  | 2.2062171  | H  | 1.7466111  | -2.9031652 | 1.0151760  |
| C | -3.5781357 | 3.7206905  | 1.7359830  | H  | 3.7754701  | -1.4444138 | -4.3093845 |
| C | -3.8781492 | 3.9525781  | 0.3879108  | Zn | -2.5622556 | 1.8686911  | -1.0387180 |
| H | -3.0156082 | 4.4418617  | -1.5478348 | Br | -3.6717488 | 1.7760837  | -3.1056426 |
| C | -1.9869972 | 3.3253857  | 3.6739413  | C  | -6.3290365 | -6.7862618 | 1.7195684  |
| H | -4.3995873 | 3.5623186  | 2.4491703  | C  | -3.2164622 | -4.3025488 | -0.0313649 |
| C | -2.3723581 | 1.8719432  | 4.0082737  | C  | -6.5170812 | -5.3992895 | 1.5734804  |
| H | -3.4607716 | 1.7020100  | 3.8738340  | C  | -4.1052251 | -6.5725816 | 0.7537913  |
| H | -2.1188524 | 1.6410493  | 5.0632521  | C  | -4.2933261 | -5.1875519 | 0.5898726  |
| H | -1.8382006 | 1.1570680  | 3.3529732  | C  | -5.1194102 | -7.3705528 | 1.3126574  |
| C | -2.6831291 | 4.3299301  | 4.6087705  | C  | -5.5049293 | -4.6062404 | 1.0152261  |
| H | -0.8941421 | 3.4240231  | 3.8389209  | O  | -3.0774143 | -3.1476575 | 0.6851931  |
| H | -3.7886475 | 4.2640935  | 4.5351812  | H  | -7.1233238 | -7.4087810 | 2.1598424  |
| H | -2.3893623 | 5.3735264  | 4.3753930  | H  | -3.1473444 | -7.0310929 | 0.4573727  |
| H | -2.4107947 | 4.1238246  | 5.6638904  | H  | -7.4591942 | -4.9339282 | 1.9032258  |
| C | -5.2976325 | 4.0480349  | -0.1517969 | H  | -4.9577792 | -8.4524485 | 1.4384573  |
| C | -6.3308319 | 3.2638557  | 0.6655640  | H  | -5.6297229 | -3.5163561 | 0.9184891  |
| H | -7.3138246 | 3.2832910  | 0.1541322  | Br | -3.5551814 | 0.4020788  | 0.7077201  |
| H | -6.4798231 | 3.7016289  | 1.6747974  | Zn | -2.1752839 | -1.6210805 | 0.1138444  |
| H | -6.0299163 | 2.2041747  | 0.7894627  | H  | -3.4799547 | -6.2423632 | -1.8459272 |
| C | -5.7040291 | 5.5290320  | -0.2975710 | H  | -3.5609000 | -1.1430482 | -1.8703011 |
| H | -5.2658967 | 3.6051630  | -1.1732333 | C  | -3.6400044 | -4.0356520 | -1.5799222 |
| H | -6.7082063 | 5.6130585  | -0.7608291 | C  | -3.4254194 | -5.3015546 | -2.4253846 |
| H | -4.9876712 | 6.0901888  | -0.9308827 | H  | -4.6878533 | -3.6804856 | -1.5646791 |
| H | -5.7405091 | 6.0251852  | 0.6949421  | C  | -2.7018018 | -3.0862308 | -2.2185988 |
| C | -0.3217978 | 4.5508048  | -1.0287044 | C  | -2.6732372 | -1.7210250 | -2.1780074 |
| C | -0.5320518 | 4.1577684  | -2.4983524 | C  | -1.6641277 | -3.8964380 | -2.9431404 |
| H | 0.3560181  | 4.4601610  | -3.0886311 | O  | -2.0872835 | -5.1940572 | -2.9682635 |
| H | -1.4085719 | 4.6650274  | -2.9509675 | O  | -0.6321010 | -3.5249584 | -3.4591327 |
| H | -0.6579674 | 3.0662803  | -2.6279298 | H  | -1.4426628 | -5.3613938 | -3.2698063 |
| C | -0.1226149 | 6.0788003  | -0.9208942 | H  | -1.8664020 | -1.1769919 | -2.6974771 |
| H | 0.6098233  | 4.0580412  | -0.6808196 | H  | -2.2697942 | -4.8996539 | -0.1004513 |
| H | 0.7283004  | 6.3999859  | -1.5553089 |    |            |            |            |
| H | 0.0836172  | 6.4029246  | 0.1166335  |    |            |            |            |
| H | -1.0308196 | 6.6138936  | -1.2684207 |    |            |            |            |
| H | 1.8844606  | -4.7365142 | -4.5775541 |    |            |            |            |
| H | 5.8171252  | -0.3955218 | -3.6955939 |    |            |            |            |
| H | 2.1839671  | -5.2925831 | 1.6703426  |    |            |            |            |
| C | 2.5213844  | -3.8503314 | -4.7868587 |    |            |            |            |
| H | 4.0681427  | 2.1595181  | -2.9456268 |    |            |            |            |

15ν-ma

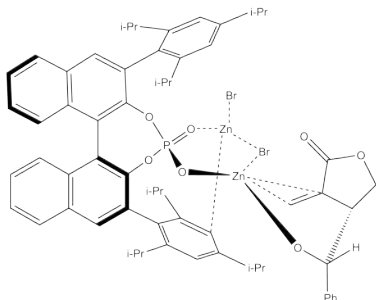

Energy (Hartree) = -11970.02814856

|   |            |            |            |
|---|------------|------------|------------|
| C | 0.8656402  | 2.4109973  | 1.7134565  |
| C | 2.2323839  | 2.2117128  | 1.9274054  |
| C | 3.0593301  | 3.3706824  | 2.1750646  |
| C | 4.4842626  | 3.3095856  | 2.2434989  |
| C | 2.4285741  | 4.6595182  | 2.3330885  |
| C | 3.2307751  | 5.8009521  | 2.6329633  |
| C | 1.0269973  | 4.7844650  | 2.1176257  |
| H | 0.5628862  | 5.7787983  | 2.2036259  |
| C | 0.2466805  | 3.6982803  | 1.7445699  |
| C | 3.2806402  | -1.1123449 | 0.3409577  |
| C | 4.1783730  | -1.5893978 | 1.2895892  |
| H | 4.7552833  | -2.4992925 | 1.0652949  |
| C | 4.3556273  | -0.9544168 | 2.5514212  |
| C | 5.2058288  | -1.5140801 | 3.5516365  |
| C | 3.6563866  | 0.2758923  | 2.8308093  |
| C | 3.8025373  | 0.8602845  | 4.1245150  |
| C | 2.8152028  | 0.8480735  | 1.8084080  |
| C | 2.5855437  | 0.0957240  | 0.6498138  |
| O | 0.0413576  | 1.3091916  | 1.5046524  |
| O | 1.6811796  | 0.5695963  | -0.3070084 |
| P | 0.0885722  | 0.5015233  | 0.0664268  |
| O | -0.6497653 | 1.2646997  | -1.0413598 |
| O | -0.3647943 | -0.9361537 | 0.3752230  |
| C | 4.6092547  | 5.6969559  | 2.7320366  |
| C | 5.2382028  | 4.4425423  | 2.5153212  |
| H | 2.7313688  | 6.7738379  | 2.7639155  |
| H | 5.2179087  | 6.5858799  | 2.9568550  |
| H | 4.9890487  | 2.3499326  | 2.0699275  |
| H | 6.3354203  | 4.3669698  | 2.5573134  |
| C | 4.6231909  | 0.2804918  | 5.0818092  |
| C | 5.3426215  | -0.9092859 | 4.7916329  |
| H | 3.2437091  | 1.7761263  | 4.3632368  |
| H | 4.7118402  | 0.7440159  | 6.0761598  |
| H | 5.9957149  | -1.3560645 | 5.5565814  |
| H | 5.7415171  | -2.4484572 | 3.3218144  |
| C | -1.4327349 | 4.1299709  | -0.0751420 |
| C | -1.1748555 | 3.8388702  | 1.2981498  |
| C | -2.7814058 | 4.1439018  | -0.5143936 |
| C | -2.2468486 | 3.6492294  | 2.2044683  |
| C | -3.5743532 | 3.7244948  | 1.7304103  |
| C | -3.8712998 | 3.9516016  | 0.3808120  |
| H | -3.0045121 | 4.4245522  | -1.5561308 |
| C | -1.9877050 | 3.3365333  | 3.6740217  |
| H | -4.3975435 | 3.5659370  | 2.4414862  |
| C | -2.3605329 | 1.8802502  | 4.0097795  |
| H | -3.4462554 | 1.6986841  | 3.8696977  |
| H | -2.1109036 | 1.6531648  | 5.0665165  |
| H | -1.8165221 | 1.1688626  | 3.3591680  |
| C | -2.6950383 | 4.3361830  | 4.6054457  |
| H | -0.8961685 | 3.4454070  | 3.8419745  |
| H | -3.7997857 | 4.2601478  | 4.5306662  |
| H | -2.4120590 | 5.3824119  | 4.3708540  |
| H | -2.4239644 | 4.1356523  | 5.6619459  |
| C | -5.2893463 | 4.0383435  | -0.1646771 |
| C | -6.3229781 | 3.2587227  | 0.6562481  |
| H | -7.3039071 | 3.2681100  | 0.1406575  |

|    |            |            |            |
|----|------------|------------|------------|
| H  | -6.4796698 | 3.7061844  | 1.6602242  |
| H  | -6.0184160 | 2.2016367  | 0.7915874  |
| C  | -5.7004852 | 5.5158825  | -0.3278734 |
| H  | -5.2520537 | 3.5832596  | -1.1807245 |
| H  | -6.7025996 | 5.5928299  | -0.7967555 |
| H  | -4.9834528 | 6.0734307  | -0.9634906 |
| H  | -5.7431552 | 6.0236017  | 0.6585280  |
| C  | -0.3112929 | 4.5336428  | -1.0327123 |
| C  | -0.5229655 | 4.1338867  | -2.5004373 |
| H  | 0.3683811  | 4.4249160  | -3.0915452 |
| H  | -1.3942407 | 4.6453082  | -2.9583811 |
| H  | -0.6586328 | 3.0432562  | -2.6251231 |
| C  | -0.0989890 | 6.0602493  | -0.9337173 |
| H  | 0.6161443  | 4.0351949  | -0.6815366 |
| H  | 0.7534866  | 6.3721690  | -1.5706669 |
| H  | 0.1117075  | 6.3886039  | 0.1015200  |
| H  | -1.0028713 | 6.6016443  | -1.2827471 |
| H  | 1.8697465  | -4.7240786 | -4.5769085 |
| H  | 5.7998715  | -0.3802186 | -3.6935416 |
| H  | 2.1938531  | -5.3024263 | 1.6655697  |
| C  | 2.5069152  | -3.8380153 | -4.7856923 |
| H  | 4.0421490  | 2.1713090  | -2.9394785 |
| H  | 1.5395206  | -3.5143656 | -6.7248579 |
| H  | -0.1654744 | -4.3823061 | 0.9635516  |
| C  | 2.7167975  | -3.1298754 | -3.4540698 |
| C  | 5.7481361  | -0.0234072 | -2.6438105 |
| C  | 1.7411187  | -2.9561760 | -5.7869944 |
| H  | 2.3215446  | -2.0497779 | -6.0599689 |
| C  | 3.3753020  | -1.8905732 | -3.3805306 |
| C  | 2.6409236  | -4.8577076 | 0.7521624  |
| H  | 4.3716133  | -5.0023314 | -4.6622446 |
| C  | 2.2408189  | -3.6900940 | -2.2584810 |
| C  | 3.8411810  | -4.3347524 | -5.3712575 |
| H  | 3.6765414  | -4.8950114 | -6.3151959 |
| H  | 1.6993711  | -4.6467416 | -2.3119734 |
| C  | 3.5340758  | 1.1864003  | -3.0023055 |
| H  | 6.2843710  | 0.9471165  | -2.5938420 |
| H  | 6.2976690  | -0.7535510 | -2.0156696 |
| C  | 3.5609028  | -1.2107237 | -2.1647918 |
| C  | 0.3333032  | -4.1434401 | 0.0023496  |
| C  | 2.3893577  | -3.0497236 | -1.0153405 |
| H  | 3.6716365  | -4.5350427 | 1.0001691  |
| H  | 2.7189308  | -5.6582124 | -0.0131827 |
| C  | 4.2905863  | 0.1320333  | -2.1728561 |
| C  | 3.0698638  | -1.8028804 | -0.9682876 |
| C  | 1.7839160  | -3.6886826 | 0.2337792  |
| H  | 2.4959052  | 1.3080190  | -2.6361849 |
| H  | -0.2444043 | -3.3408736 | -0.4943340 |
| H  | 3.4881250  | 0.9029523  | -4.0744827 |
| H  | 0.7731291  | -2.6344751 | -5.3576074 |
| H  | 0.2734447  | -5.0431729 | -0.6441348 |
| H  | 4.5186686  | -3.4850448 | -5.6002505 |
| H  | 4.3318676  | 0.5050972  | -1.1290000 |
| H  | 1.7524458  | -2.9092312 | 1.0220670  |
| H  | 3.7527078  | -1.4286914 | -4.3071176 |
| Zn | -2.5722952 | 1.8429576  | -1.0422881 |
| Br | -3.6951345 | 1.7806603  | -3.0913332 |
| C  | -6.3217050 | -6.7856672 | 1.7163404  |
| C  | -3.2107631 | -4.3001315 | -0.0319691 |
| C  | -6.4982728 | -5.3952838 | 1.5967737  |
| C  | -4.1076164 | -6.5748296 | 0.7309221  |
| C  | -4.2855817 | -5.1861739 | 0.5909225  |
| C  | -5.1220898 | -7.3731920 | 1.2872737  |
| C  | -5.4858864 | -4.6016021 | 1.0413652  |
| O  | -3.0715685 | -3.1454061 | 0.6783541  |
| H  | -7.1164657 | -7.4085983 | 2.1549568  |
| H  | -3.1550934 | -7.0352297 | 0.4201857  |
| H  | -7.4316531 | -4.9273974 | 1.9469736  |
| H  | -4.9682324 | -8.4581315 | 1.3947456  |
| H  | -5.5966122 | -3.5085091 | 0.9684835  |
| Br | -3.5498900 | 0.3957635  | 0.7275794  |

|    |            |            |            |
|----|------------|------------|------------|
| Zn | -2.1762565 | -1.6188288 | 0.1008673  |
| H  | -3.4862598 | -6.2387179 | -1.8502657 |
| H  | -3.5678075 | -1.1352891 | -1.8833084 |
| C  | -3.6422718 | -4.0335039 | -1.5836317 |
| C  | -3.4244134 | -5.2983147 | -2.4300194 |
| H  | -4.6915650 | -3.6828503 | -1.5595346 |
| C  | -2.7079282 | -3.0827468 | -2.2238400 |
| C  | -2.6799560 | -1.7167579 | -2.1846272 |
| C  | -1.6635562 | -3.8932052 | -2.9400307 |
| O  | -2.0865621 | -5.1929486 | -2.9654496 |
| O  | -0.6283196 | -3.5207086 | -3.4456399 |
| H  | -4.1403861 | -5.3575658 | -3.2768410 |
| H  | -1.8728063 | -1.1745737 | -2.7058506 |
| H  | -2.2640382 | -4.8969059 | -0.1078399 |

### 15 $\xi$ -ma

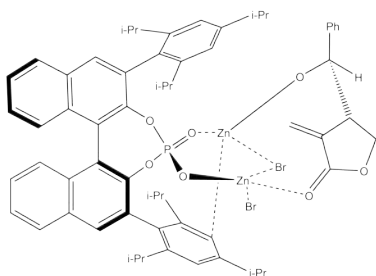

Energy (Hartree) = -11970.04902019

|   |            |            |            |
|---|------------|------------|------------|
| C | 1.1124767  | 2.7942361  | 1.0751662  |
| C | 2.4612497  | 2.9100414  | 0.7218868  |
| C | 2.9769952  | 4.2346168  | 0.4784913  |
| C | 4.2769102  | 4.4696337  | -0.0603581 |
| C | 2.1349753  | 5.3725128  | 0.7609673  |
| C | 2.6511309  | 6.6864730  | 0.5526726  |
| C | 0.7989869  | 5.1699806  | 1.2140072  |
| H | 0.1823459  | 6.0492853  | 1.4510684  |
| C | 0.2459961  | 3.9006822  | 1.3305681  |
| C | 3.5609842  | -0.6617067 | -0.1774632 |
| C | 4.7978619  | -0.7380502 | 0.4490090  |
| H | 5.3859204  | -1.6655574 | 0.3723105  |
| C | 5.3037663  | 0.3319174  | 1.2408462  |
| C | 6.5391739  | 0.2039916  | 1.9435987  |
| C | 4.5203140  | 1.5349701  | 1.3970802  |
| C | 4.9805118  | 2.5173514  | 2.3257236  |
| C | 3.3001146  | 1.6804214  | 0.6374953  |
| C | 2.8654856  | 0.5867386  | -0.1211810 |
| O | 0.5647891  | 1.5188541  | 1.2336981  |
| O | 1.7149016  | 0.7091571  | -0.8933614 |
| P | 0.2392239  | 0.7171197  | -0.1544086 |
| O | -0.7129504 | 1.5063269  | -1.0535350 |
| O | -0.1699824 | -0.6970722 | 0.2856665  |
| C | 3.9295470  | 6.8807007  | 0.0524644  |
| C | 4.7409510  | 5.7607120  | -0.2697625 |
| H | 2.0026625  | 7.5469762  | 0.7804600  |
| H | 4.3105165  | 7.9000056  | -0.1121784 |
| H | 4.9093696  | 3.6098670  | -0.3224308 |
| H | 5.7435327  | 5.9166668  | -0.6962098 |
| C | 6.1765369  | 2.3532386  | 3.0102334  |
| C | 6.9756467  | 1.1974404  | 2.8058932  |
| H | 4.3717240  | 3.4138469  | 2.5029786  |
| H | 6.5048116  | 3.1257506  | 3.7222018  |
| H | 7.9272519  | 1.0837932  | 3.3469410  |
| H | 7.1309150  | -0.7139888 | 1.8013329  |
| C | -2.2331081 | 3.9299126  | 0.7958047  |
| C | -1.1800381 | 3.6428650  | 1.7110661  |
| C | -3.5531723 | 3.6164828  | 1.1735883  |
| C | -1.4728653 | 3.0392156  | 2.9666013  |

|    |            |            |            |
|----|------------|------------|------------|
| C  | -2.8089878 | 2.7427087  | 3.2868938  |
| C  | -3.8669633 | 3.0188234  | 2.4045264  |
| H  | -4.3739180 | 3.8279082  | 0.4706148  |
| C  | -0.3855105 | 2.7165308  | 3.9907504  |
| H  | -3.0272078 | 2.2713608  | 4.2584970  |
| C  | -0.3651302 | 1.2230782  | 4.3646933  |
| H  | -1.2923158 | 0.9211494  | 4.8954064  |
| H  | 0.4872716  | 1.0031051  | 5.0403855  |
| H  | -0.2626910 | 0.5904280  | 3.4613951  |
| C  | -0.5193866 | 3.6126175  | 5.2360740  |
| H  | 0.5960648  | 2.9522102  | 3.5319143  |
| H  | -1.4807746 | 3.4334518  | 5.7613456  |
| H  | -0.4830330 | 4.6868138  | 4.9635688  |
| H  | 0.3003278  | 3.4120671  | 5.9569774  |
| C  | -5.3026243 | 2.6339849  | 2.7396392  |
| C  | -5.4861114 | 1.1052314  | 2.6794937  |
| H  | -6.5417314 | 0.8207176  | 2.8712274  |
| H  | -4.8559991 | 0.5997633  | 3.4414686  |
| H  | -5.1952751 | 0.7042919  | 1.6869753  |
| C  | -5.7670946 | 3.2014709  | 4.0913613  |
| H  | -5.9470716 | 3.0786962  | 1.9494390  |
| H  | -6.8359307 | 2.9650961  | 4.2722726  |
| H  | -5.6459971 | 4.3026596  | 4.1294064  |
| H  | -5.1876487 | 2.7708129  | 4.9345318  |
| C  | -1.9786666 | 4.5386698  | -0.5831524 |
| C  | -2.9000610 | 3.9645291  | -1.6728100 |
| H  | -2.5102065 | 4.2134869  | -2.6796344 |
| H  | -3.9310190 | 4.3708310  | -1.6043986 |
| H  | -2.9788138 | 2.8624331  | -1.6038642 |
| C  | -2.1086203 | 6.0745326  | -0.5570701 |
| H  | -0.9375724 | 4.2820422  | -0.8693718 |
| H  | -1.9020312 | 6.4994650  | -1.5609059 |
| H  | -1.4106906 | 6.5458919  | 0.1612393  |
| H  | -3.1374223 | 6.3731958  | -0.2650966 |
| H  | -0.3802406 | -5.0371775 | -2.1144979 |
| H  | 4.4506313  | -2.6655683 | -4.6357946 |
| H  | 3.2372961  | -3.2317279 | 3.2076686  |
| C  | 0.5938180  | -5.0797859 | -2.6527545 |
| H  | 3.7012025  | 0.3841163  | -4.5920843 |
| H  | -0.4162945 | -5.7101750 | -4.4736284 |
| C  | 1.4305076  | -3.9526608 | -2.0611466 |
| C  | 4.9351555  | -2.0034154 | -3.8883239 |
| C  | 0.3058233  | -4.9335503 | -4.1508700 |
| H  | 1.2219782  | -5.0604704 | -4.7651770 |
| C  | 2.3130948  | -3.1539293 | -2.8003479 |
| C  | 3.2250341  | -3.3405886 | 2.1040085  |
| H  | 1.4005544  | -6.5794911 | -1.2497962 |
| C  | 1.3177517  | -3.6960012 | -0.6665483 |
| C  | 1.2344467  | -6.4460977 | -2.3377045 |
| H  | 0.5793637  | -7.2708325 | -2.6852514 |
| H  | 0.6887714  | -4.3710175 | -0.0641664 |
| C  | 3.0490569  | -0.2950941 | -4.0058365 |
| H  | 5.6103220  | -1.3225115 | -4.4453779 |
| H  | 5.5574165  | -2.6394169 | -3.2263580 |
| C  | 3.0309785  | -2.0876561 | -2.2129661 |
| C  | 0.7292238  | -3.0475788 | 2.1578516  |
| C  | 2.0689285  | -2.6836852 | -0.0210970 |
| H  | 4.1969403  | -2.9814368 | 1.7179279  |
| H  | 3.1444752  | -4.4219901 | 1.8674361  |
| C  | 3.9020488  | -1.1915823 | -3.0876739 |
| C  | 2.8984942  | -1.8420429 | -0.8233446 |
| C  | 2.0327187  | -2.5654096 | 1.5022369  |
| H  | 2.3360913  | 0.3244776  | -3.4287521 |
| H  | 2.4558546  | -0.8989310 | -4.7229241 |
| H  | -0.1304277 | -3.9421317 | -4.3861633 |
| H  | 2.2166375  | -6.5481183 | -2.8450360 |
| H  | 4.4667126  | -0.5228594 | -2.4052654 |
| H  | 2.1580798  | -1.4910710 | 1.7523267  |
| H  | 2.4137861  | -3.3235608 | -3.8818632 |
| Zn | -1.2882349 | 1.1772721  | -2.9304312 |
| Br | -0.6154373 | 2.6635726  | -4.5571583 |

|    |            |            |            |
|----|------------|------------|------------|
| H  | -5.0526875 | -3.1644770 | -3.2244927 |
| Br | -0.4853410 | -1.2056419 | -3.2851999 |
| Zn | -0.4722525 | -2.1734151 | -1.0106849 |
| C  | -4.0825389 | -2.5278191 | -1.3167160 |
| C  | -5.0522451 | -2.3338437 | -2.4936564 |
| C  | -3.6142380 | -1.1150841 | -1.1076563 |
| C  | -3.1227882 | -0.5116620 | -0.0030412 |
| C  | -3.7786642 | -0.4272139 | -2.4086945 |
| O  | -4.5844376 | -1.1449635 | -3.2005226 |
| O  | -3.2873417 | 0.6382409  | -2.8095586 |
| H  | -6.0942495 | -2.1406344 | -2.1653249 |
| C  | -3.9588888 | -7.0506358 | -0.8406659 |
| C  | -3.5321195 | -5.7220989 | -0.7079484 |
| C  | -3.3343335 | -4.9160559 | -1.8472498 |
| C  | -3.5517510 | -5.4751478 | -3.1214601 |
| C  | -3.9790502 | -6.8074112 | -3.2576503 |
| C  | -4.1875477 | -7.5969562 | -2.1165213 |
| H  | -4.1081693 | -7.6711308 | 0.0569430  |
| H  | -3.3169269 | -5.2928820 | 0.2826549  |
| C  | -2.8610580 | -3.4771088 | -1.6816282 |
| H  | -3.3603183 | -4.8653692 | -4.0202406 |
| H  | -4.1394750 | -7.2320061 | -4.2608838 |
| H  | -4.5184459 | -8.6419142 | -2.2198068 |
| O  | -1.8768476 | -3.3938913 | -0.7094182 |
| H  | -0.1640120 | -2.5593420 | 1.7256174  |
| H  | 0.7488822  | -2.8065117 | 3.2395347  |
| H  | 0.6025876  | -4.1467997 | 2.0746503  |
| H  | -2.5126718 | -3.1312504 | -2.6910274 |
| H  | -4.5808034 | -2.9478611 | -0.4213655 |
| H  | -2.8106454 | 0.5437678  | -0.0293684 |
| H  | -3.0345221 | -1.0559981 | 0.9475895  |

### 15 $\gamma$ -mi; COSMO

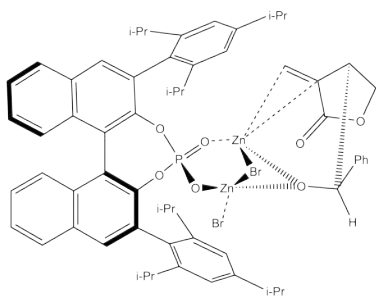

Energy (Hartree) = -11970.05113318

|   |            |            |            |
|---|------------|------------|------------|
| C | 1.0913186  | 2.1116807  | 1.3555738  |
| C | 2.4873721  | 2.0037019  | 1.3828893  |
| C | 3.2594150  | 3.2196496  | 1.4781815  |
| C | 4.6777593  | 3.2480847  | 1.3167695  |
| C | 2.5749258  | 4.4666207  | 1.7172530  |
| C | 3.3353824  | 5.6673926  | 1.8518047  |
| C | 1.1532039  | 4.4825448  | 1.7813839  |
| H | 0.6416467  | 5.4351873  | 1.9853052  |
| C | 0.3931959  | 3.3414526  | 1.5504894  |
| C | 3.3391969  | -1.5418410 | 0.1818776  |
| C | 4.3514012  | -1.8917656 | 1.0680867  |
| H | 4.8289363  | -2.8787186 | 0.9719715  |
| C | 4.7361722  | -1.0458146 | 2.1467151  |
| C | 5.7115102  | -1.4669018 | 3.1005582  |
| C | 4.0828865  | 0.2296682  | 2.3189089  |
| C | 4.3864873  | 0.9878840  | 3.4902218  |
| C | 3.1320771  | 0.6645389  | 1.3219859  |
| C | 2.7812246  | -0.2331503 | 0.3093040  |
| O | 0.3127693  | 0.9632101  | 1.1972469  |
| O | 1.8655381  | 0.1748542  | -0.6617065 |
| P | 0.2710024  | 0.2524466  | -0.2824789 |
| O | -0.3443673 | 1.2076681  | -1.3347159 |
| O | -0.3573229 | -1.1281455 | -0.0696660 |

|   |            |            |            |
|---|------------|------------|------------|
| C | 4.7155259  | 5.6549107  | 1.7175769  |
| C | 5.3870744  | 4.4358384  | 1.4310957  |
| H | 2.7994036  | 6.6095400  | 2.0470407  |
| H | 5.2902881  | 6.5884906  | 1.8152393  |
| H | 5.2094290  | 2.3142376  | 1.0871438  |
| H | 6.4790923  | 4.4328811  | 1.2931398  |
| C | 5.3251250  | 0.5410317  | 4.4106226  |
| C | 6.0093530  | -0.6873762 | 4.2081010  |
| H | 3.8601213  | 1.9353718  | 3.6686368  |
| H | 5.5356075  | 1.1426024  | 5.3080844  |
| H | 6.7582613  | -1.0266232 | 4.9398989  |
| H | 6.2095470  | -2.4372696 | 2.9477636  |
| C | -1.7576290 | 3.9995698  | 0.4001541  |
| C | -1.1018691 | 3.3959448  | 1.5116578  |
| C | -3.1608435 | 4.1090301  | 0.4237350  |
| C | -1.8596357 | 2.8814749  | 2.5955543  |
| C | -3.2603253 | 3.0306409  | 2.5770543  |
| C | -3.9323167 | 3.6580995  | 1.5143361  |
| H | -3.6755363 | 4.5883573  | -0.4251427 |
| C | -1.1985446 | 2.2078735  | 3.7965802  |
| H | -3.8382831 | 2.6603728  | 3.4373886  |
| C | -1.6429626 | 0.7418302  | 3.9459255  |
| H | -2.7250717 | 0.6670586  | 4.1836668  |
| H | -1.0891382 | 0.2498771  | 4.7719486  |
| H | -1.4524589 | 0.1705579  | 3.0162829  |
| C | -1.4321866 | 3.0089638  | 5.0903808  |
| H | -0.1043014 | 2.1999419  | 3.6176384  |
| H | -2.5094976 | 3.0498635  | 5.3553585  |
| H | -1.0714981 | 4.0526723  | 4.9877654  |
| H | -0.8960469 | 2.5416316  | 5.9420766  |
| C | -5.4309665 | 3.9396187  | 1.5483300  |
| C | -6.2396892 | 2.9631620  | 2.4136498  |
| H | -7.3261570 | 3.1438762  | 2.2865232  |
| H | -6.0153853 | 3.0858846  | 3.4940033  |
| H | -6.0368907 | 1.9042884  | 2.1521545  |
| C | -5.6775412 | 5.3951434  | 1.9970828  |
| H | -5.7949162 | 3.8525016  | 0.5022696  |
| H | -6.7593999 | 5.6411273  | 1.9679574  |
| H | -5.1435677 | 6.1149919  | 1.3448991  |
| H | -5.3174878 | 5.5503919  | 3.0360181  |
| C | -0.9657218 | 4.5665041  | -0.7789380 |
| C | -1.5373836 | 4.1773629  | -2.1495620 |
| H | -0.8325518 | 4.4650526  | -2.9559963 |
| H | -2.5077596 | 4.6638181  | -2.3643178 |
| H | -1.6920333 | 3.0822342  | -2.2179993 |
| C | -0.8528352 | 6.1009401  | -0.6791927 |
| H | 0.0570530  | 4.1428509  | -0.7205268 |
| H | -0.2424885 | 6.5056787  | -1.5129571 |
| H | -0.3842641 | 6.4207317  | 0.2720676  |
| H | -1.8568349 | 6.5716580  | -0.7325051 |
| H | -0.1621830 | -5.4185481 | -3.1967103 |
| H | 4.9332784  | -2.5140445 | -4.2352098 |
| H | 2.4393085  | -5.1279557 | 2.7694341  |
| C | 0.8841047  | -5.3172651 | -3.5652868 |
| H | 3.8282334  | 0.4692008  | -4.0659459 |
| H | 0.2293491  | -5.5903492 | -5.6279214 |
| H | 0.1280650  | -4.1269201 | 2.6650850  |
| C | 1.5543724  | -4.3172849 | -2.6288183 |
| C | 5.1736282  | -1.8707910 | -3.3627729 |
| C | 0.8191502  | -4.8670245 | -5.0291322 |
| H | 1.8289841  | -4.8100208 | -5.4879121 |
| C | 2.3919736  | -3.2837087 | -3.0766848 |
| C | 2.5501559  | -4.9849803 | 1.6742835  |
| H | 1.5646462  | -7.0626923 | -2.4004296 |
| C | 1.3413531  | -4.4346221 | -1.2410148 |
| C | 1.5559969  | -6.7003448 | -3.4480497 |
| H | 1.0242422  | -7.4536434 | -4.0658678 |
| H | 0.6756652  | -5.2327891 | -0.8780700 |
| C | 3.1622224  | -0.3532371 | -3.7313068 |
| H | 5.8550409  | -1.0683101 | -3.7145216 |
| H | 5.7247670  | -2.4936366 | -2.6289431 |

|    |            |            |            |   |            |            |            |
|----|------------|------------|------------|---|------------|------------|------------|
| C  | 2.9926811  | -2.3709904 | -2.1877361 | C | 3.3467736  | -1.5416870 | 0.1801405  |
| C  | 0.2204259  | -4.0013730 | 1.5663255  | C | 4.3572150  | -1.8946927 | 1.0669459  |
| C  | 1.9292939  | -3.5641280 | -0.3086466 | H | 4.8337464  | -2.8816761 | 0.9663468  |
| H  | 3.6267393  | -4.8366003 | 1.4548324  | C | 4.7399880  | -1.0542203 | 2.1502404  |
| H  | 2.2368814  | -5.9259734 | 1.1749000  | C | 5.7143756  | -1.4781892 | 3.1030465  |
| C  | 3.8978215  | -1.2725583 | -2.7409551 | C | 4.0854675  | 0.2196864  | 2.3282129  |
| C  | 2.7623945  | -2.5135396 | -0.7966086 | C | 4.3879320  | 0.9727723  | 3.5027562  |
| C  | 1.6957508  | -3.7977888 | 1.1859319  | C | 3.1349098  | 0.6582189  | 1.3329931  |
| H  | 2.2637094  | 0.0924599  | -3.2626063 | C | 2.7876232  | -0.2342782 | 0.3145043  |
| H  | -0.3926044 | -3.1297110 | 1.2697467  | O | 0.3152766  | 0.9495074  | 1.2073748  |
| H  | 2.8331540  | -0.9064375 | -4.6355638 | O | 1.8717149  | 0.1773224  | -0.6545831 |
| H  | 0.3418575  | -3.8714787 | -5.1302905 | P | 0.2789859  | 0.2436749  | -0.2749288 |
| H  | -0.2205804 | -4.9004896 | 1.0906724  | O | -0.3459730 | 1.2024711  | -1.3196772 |
| H  | 2.6096983  | -6.6537175 | -3.7961326 | O | -0.3447961 | -1.1402815 | -0.0724629 |
| H  | 4.2204487  | -0.6429191 | -1.8858028 | C | 4.7058172  | 5.6503818  | 1.7455081  |
| H  | 2.0419184  | -2.8934388 | 1.7257773  | C | 5.3808711  | 4.4329266  | 1.4632881  |
| H  | 2.5756913  | -3.1641492 | -4.1545108 | H | 2.7863577  | 6.6015472  | 2.0615349  |
| Zn | -1.5392421 | -2.1856023 | -1.2967037 | H | 5.2781057  | 6.5850273  | 1.8468042  |
| Br | -2.3276151 | -4.3678372 | -1.2604975 | H | 5.2082661  | 2.3109867  | 1.1178325  |
| H  | -5.7947823 | -4.0074476 | 0.7497427  | H | 6.4736788  | 4.4316426  | 1.3322405  |
| H  | -5.7744084 | -3.2348252 | 3.1379496  | C | 5.3267203  | 0.5230282  | 4.4209211  |
| C  | -5.4071794 | -3.0093970 | 1.0044270  | C | 6.0113584  | -0.7036541 | 4.2136393  |
| C  | -5.3888050 | -2.5786752 | 2.3424555  | H | 3.8605922  | 1.9191596  | 3.6837130  |
| C  | -4.9157259 | -2.1770153 | -0.0114407 | H | 5.5367808  | 1.1212429  | 5.3206566  |
| C  | -4.8648248 | -1.3159904 | 2.6629414  | H | 6.7601134  | -1.0458046 | 4.9441517  |
| H  | -4.9044073 | -2.5349812 | -1.0522768 | H | 6.2126911  | -2.4477814 | 2.9464757  |
| H  | -4.8330269 | -0.9774533 | 3.7101892  | C | -1.7511122 | 3.9897113  | 0.3804552  |
| C  | -4.3940158 | -0.9073063 | 0.3040110  | C | -1.1058482 | 3.3875051  | 1.4989728  |
| C  | -4.3656531 | -0.4855199 | 1.6467198  | C | -3.1528355 | 4.1162046  | 0.3985942  |
| H  | -6.0655375 | 1.2245028  | -0.0537296 | C | -1.8735308 | 2.8858496  | 2.5815041  |
| C  | -6.0719357 | 1.2706191  | -1.1597993 | C | -3.2720898 | 3.0526958  | 2.5577641  |
| C  | -4.9546711 | 0.4346482  | -1.8079616 | C | -3.9327964 | 3.6846228  | 1.4909166  |
| H  | -3.9300437 | 0.4950556  | 1.8945320  | H | -3.6593588 | 4.5946114  | -0.4557606 |
| C  | -3.8238375 | -0.0099273 | -0.7766042 | C | -1.2246365 | 2.2070385  | 3.7860997  |
| O  | -2.8287201 | -0.6370635 | -1.5208296 | H | -3.8566448 | 2.6956508  | 3.4192866  |
| H  | -7.0772919 | 0.9765060  | -1.5210444 | C | -1.6840524 | 0.7455249  | 3.9328972  |
| Br | -0.6409561 | -1.4131474 | -3.6713543 | H | -2.7674166 | 0.6803089  | 4.1676845  |
| C  | -4.3816865 | 1.3647829  | -2.8161584 | H | -1.1375545 | 0.2461425  | 4.7591812  |
| O  | -5.8429004 | 2.6457934  | -1.5448429 | H | -1.4972117 | 0.1725628  | 3.0036605  |
| Zn | -1.6680068 | 0.5141216  | -2.6073121 | C | -1.4551162 | 3.0109550  | 5.0784605  |
| C  | -3.5182335 | 1.1229161  | -3.8524688 | H | -0.1298821 | 2.1879702  | 3.6115716  |
| C  | -4.9034040 | 2.7470125  | -2.5209521 | H | -2.5327406 | 3.0640508  | 5.3399275  |
| O  | -4.6041004 | 3.7958840  | -3.0499880 | H | -1.0835966 | 4.0507673  | 4.9769240  |
| H  | -3.2170191 | 1.9671007  | -4.4964837 | H | -0.9278216 | 2.5389458  | 5.9330068  |
| H  | -3.3678779 | 0.0958514  | -4.2264680 | C | -5.4260381 | 3.9945770  | 1.5215943  |
| H  | -3.4417251 | 0.9216690  | -0.2859101 | C | -6.2528786 | 3.0482472  | 2.4028537  |
| H  | -5.3263883 | -0.5047992 | -2.2611977 | H | -7.3357242 | 3.2498039  | 2.2763109  |
|    |            |            |            | H | -6.0242697 | 3.1820853  | 3.4810302  |
|    |            |            |            | H | -6.0740160 | 1.9812938  | 2.1572716  |
|    |            |            |            | C | -5.6437841 | 5.4611500  | 1.9482886  |
|    |            |            |            | H | -5.7934931 | 3.8970329  | 0.4777464  |
|    |            |            |            | H | -6.7204023 | 5.7287291  | 1.9166173  |
|    |            |            |            | H | -5.0966570 | 6.1601515  | 1.2848340  |
|    |            |            |            | H | -5.2787284 | 5.6259499  | 2.9838479  |
|    |            |            |            | C | -0.9492932 | 4.5371775  | -0.8013567 |
|    |            |            |            | C | -1.5226668 | 4.1433517  | -2.1702642 |
|    |            |            |            | H | -0.8097549 | 4.4105285  | -2.9766141 |
|    |            |            |            | H | -2.4849963 | 4.6410993  | -2.3953752 |
|    |            |            |            | H | -1.6940981 | 3.0498449  | -2.2264654 |
|    |            |            |            | C | -0.8188985 | 6.0709611  | -0.7160490 |
|    |            |            |            | H | 0.0679999  | 4.1014963  | -0.7369914 |
|    |            |            |            | H | -0.2045367 | 6.4614491  | -1.5535446 |
|    |            |            |            | H | -0.3454647 | 6.3941213  | 0.2314458  |
|    |            |            |            | H | -1.8170524 | 6.5532542  | -0.7725764 |
|    |            |            |            | H | -0.1588144 | -5.3962908 | -3.2200471 |
|    |            |            |            | H | 4.9292304  | -2.4783620 | -4.2454037 |
|    |            |            |            | H | 2.4646175  | -5.1756155 | 2.7296769  |
|    |            |            |            | C | 0.8865582  | -5.2901913 | -3.5897190 |
|    |            |            |            | H | 3.8226725  | 0.5021889  | -4.0580018 |
|    |            |            |            | H | 0.2288113  | -5.5506454 | -5.6529062 |
|    |            |            |            | H | 0.1580041  | -4.1606118 | 2.6555004  |

### 15 $\gamma$ -mi

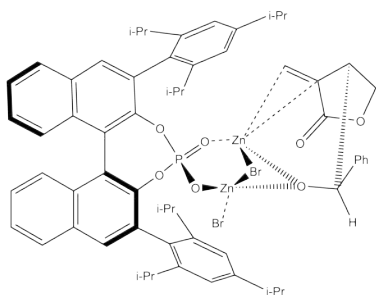

Energy (Hartree) = -11970.03775188

|   |           |           |           |
|---|-----------|-----------|-----------|
| C | 1.0905632 | 2.1003347 | 1.3654640 |
| C | 2.4868110 | 1.9956145 | 1.3983284 |
| C | 3.2556644 | 3.2131252 | 1.4970316 |
| C | 4.6746395 | 3.2443838 | 1.3439576 |
| C | 2.5676609 | 4.4588387 | 1.7312921 |
| C | 3.3253613 | 5.6602682 | 1.8705064 |
| C | 1.1458300 | 4.4719450 | 1.7844735 |
| H | 0.6297459 | 5.4235110 | 1.9820262 |
| C | 0.3889329 | 3.3296036 | 1.5501869 |

|    |            |            |            |
|----|------------|------------|------------|
| C  | 1.5571894  | -4.2960041 | -2.6475902 |
| C  | 5.1700935  | -1.8399623 | -3.3697326 |
| C  | 0.8176782  | -4.8300418 | -5.0501078 |
| H  | 1.8262041  | -4.7674736 | -5.5110681 |
| C  | 2.3896387  | -3.2558743 | -3.0892321 |
| C  | 2.5670028  | -5.0182262 | 1.6357599  |
| H  | 1.5750718  | -7.0416017 | -2.4388340 |
| C  | 1.3516122  | -4.4271527 | -1.2600854 |
| C  | 1.5623723  | -6.6721171 | -3.4837095 |
| H  | 1.0311643  | -7.4228385 | -4.1049945 |
| H  | 0.6893690  | -5.2302607 | -0.9018255 |
| C  | 3.1570155  | -0.3211893 | -3.7252594 |
| H  | 5.8508266  | -1.0353822 | -3.7178666 |
| H  | 5.7222653  | -2.4675967 | -2.6410812 |
| C  | 2.9928054  | -2.3505959 | -2.1948798 |
| C  | 0.2440767  | -4.0145149 | 1.5588866  |
| C  | 1.9432895  | -3.5655359 | -0.3220397 |
| H  | 3.6428095  | -4.8760242 | 1.4084606  |
| H  | 2.2429519  | -5.9499791 | 1.1264523  |
| C  | 3.8947541  | -1.2466273 | -2.7424331 |
| C  | 2.7706942  | -2.5077619 | -0.8039798 |
| C  | 1.7183816  | -3.8177096 | 1.1708750  |
| H  | 2.2614348  | 0.1247543  | -3.2515940 |
| H  | -0.3621842 | -3.1305173 | 1.2857005  |
| H  | 2.8239696  | -0.8681609 | -4.6317228 |
| H  | 0.3365066  | -3.8358763 | -5.1444864 |
| H  | -0.2117004 | -4.8984172 | 1.0691771  |
| H  | 2.6151670  | -6.6207674 | -3.8333785 |
| H  | 4.2184173  | -0.6222936 | -1.8837536 |
| H  | 2.0758239  | -2.9244016 | 1.7215077  |
| H  | 2.5684999  | -3.1263968 | -4.1666581 |
| Zn | -1.5169867 | -2.2186039 | -1.2898526 |
| Br | -2.3049448 | -4.3938821 | -1.2738526 |
| H  | -5.6928918 | -4.0681913 | 0.8222552  |
| H  | -5.8132648 | -3.2276637 | 3.1852360  |
| C  | -5.3601724 | -3.0476557 | 1.0644799  |
| C  | -5.4189015 | -2.5790298 | 2.3880120  |
| C  | -4.8564293 | -2.2256531 | 0.0465809  |
| C  | -4.9574876 | -1.2889841 | 2.6936037  |
| H  | -4.7790272 | -2.6141855 | -0.9803969 |
| H  | -4.9830483 | -0.9208069 | 3.7308883  |
| C  | -4.3962004 | -0.9291892 | 0.3473821  |
| C  | -4.4431974 | -0.4688983 | 1.6768310  |
| H  | -6.0755439 | 1.1833777  | -0.0204620 |
| C  | -6.0775027 | 1.2347527  | -1.1265051 |
| C  | -4.9578975 | 0.3982426  | -1.7712884 |
| H  | -4.0494565 | 0.5315679  | 1.9153474  |
| C  | -3.8210122 | -0.0397141 | -0.7364778 |
| O  | -2.8305862 | -0.6676656 | -1.4816980 |
| H  | -7.0821660 | 0.9387040  | -1.4909502 |
| Br | -0.6513813 | -1.3966098 | -3.6805717 |
| C  | -4.3897158 | 1.3266600  | -2.7826516 |
| O  | -5.8481961 | 2.6080927  | -1.5068539 |
| Zn | -1.6742849 | 0.4846212  | -2.5629241 |
| C  | -3.5292321 | 1.0865751  | -3.8223853 |
| C  | -4.9047717 | 2.7113754  | -2.4829743 |
| O  | -4.5982382 | 3.7585704  | -3.0067921 |
| H  | -3.2353082 | 1.9357333  | -4.4634686 |
| H  | -3.3729074 | 0.0615525  | -4.1983355 |
| H  | -3.4422753 | 0.8967131  | -0.2521325 |
| H  | -5.3228566 | -0.5489621 | -2.2140498 |

Energy (Hartree) = -11970.04792661

|   |            |            |            |
|---|------------|------------|------------|
| C | 1.4930396  | 1.9765306  | 1.0656636  |
| C | 2.8901760  | 2.0453797  | 0.9855467  |
| C | 3.4879817  | 3.3561210  | 0.9070233  |
| C | 4.8700475  | 3.5523525  | 0.6105069  |
| C | 2.6565664  | 4.5194364  | 1.1052824  |
| C | 3.2506666  | 5.8164877  | 1.0512241  |
| C | 1.2613211  | 4.3556961  | 1.3412959  |
| H | 0.6478468  | 5.2474119  | 1.5416838  |
| C | 0.6500403  | 3.1074571  | 1.2896637  |
| C | 4.0402336  | -1.5645840 | 0.3163772  |
| C | 5.1181212  | -1.6734947 | 1.1865523  |
| H | 5.6618991  | -2.6284534 | 1.2507930  |
| C | 5.4871107  | -0.6132058 | 2.0628694  |
| C | 6.5437208  | -0.7809081 | 3.0081247  |
| C | 4.7299777  | 0.6170007  | 2.0560515  |
| C | 5.0169974  | 1.5836555  | 3.0672885  |
| C | 3.6983167  | 0.7948558  | 1.0573858  |
| C | 3.4000372  | -0.2905575 | 0.2286319  |
| O | 0.8568418  | 0.7384381  | 1.0186684  |
| O | 2.4398996  | -0.1306544 | -0.7684539 |
| P | 0.8524500  | -0.1192943 | -0.3761537 |
| O | 0.1508027  | 0.5775476  | -1.5486610 |
| O | 0.3424430  | -1.5105356 | 0.0640356  |
| C | 4.6020520  | 5.9712757  | 0.7802680  |
| C | 5.4127924  | 4.8283701  | 0.5448122  |
| H | 2.6080444  | 6.6960030  | 1.2142192  |
| H | 5.0454432  | 6.9775406  | 0.7329003  |
| H | 5.5045195  | 2.6752770  | 0.4192626  |
| H | 6.4789780  | 4.9551678  | 0.3025243  |
| C | 6.0371805  | 1.3809984  | 3.9872546  |
| C | 6.8239398  | 0.1994765  | 3.9477134  |
| H | 4.4144329  | 2.4998205  | 3.1236215  |
| H | 6.2323540  | 2.1426295  | 4.7576402  |
| H | 7.6373732  | 0.0551670  | 4.6750085  |
| H | 7.1202501  | -1.7191479 | 2.9881985  |
| C | -1.7385492 | 3.4671401  | 0.5369513  |
| C | -0.8225663 | 2.9194538  | 1.4775315  |
| C | -3.1196916 | 3.2889342  | 0.7536846  |
| C | -1.3113465 | 2.1848062  | 2.5982462  |
| C | -2.6984821 | 2.0239871  | 2.7534702  |
| C | -3.6255178 | 2.5678752  | 1.8464709  |
| H | -3.8301224 | 3.7254955  | 0.0332979  |
| C | -0.3905970 | 1.5982900  | 3.6687204  |
| H | -3.0691281 | 1.4604588  | 3.6247762  |
| C | -0.5696387 | 0.0754968  | 3.8149933  |
| H | -1.5811736 | -0.1823336 | 4.1933412  |
| H | 0.1678413  | -0.3353369 | 4.5353249  |
| H | -0.4190603 | -0.4345405 | 2.8435401  |
| C | -0.5798082 | 2.3232411  | 5.0148086  |
| H | 0.6580327  | 1.7761826  | 3.3577927  |
| H | -1.6077027 | 2.1830930  | 5.4102747  |
| H | -0.4058521 | 3.4135556  | 4.9112186  |
| H | 0.1289249  | 1.9321256  | 5.7739890  |
| C | -5.1258642 | 2.4010456  | 2.0566015  |
| C | -5.5413537 | 0.9225800  | 2.1568015  |
| H | -6.6429264 | 0.8291631  | 2.2501513  |
| H | -5.0888581 | 0.4326307  | 3.0439545  |
| H | -5.2270345 | 0.3559629  | 1.2569432  |
| C | -5.6065993 | 3.1993554  | 3.2828706  |
| H | -5.6275839 | 2.8288105  | 1.1609406  |
| H | -6.7074340 | 3.1221637  | 3.4006102  |
| H | -5.3431779 | 4.2724070  | 3.1921516  |
| H | -5.1399843 | 2.8166377  | 4.2148360  |
| C | -1.2852727 | 4.2189337  | -0.7134428 |
| C | -1.8454381 | 3.5833847  | -1.9952400 |
| H | -1.4209856 | 4.0694377  | -2.8968058 |
| H | -2.9497163 | 3.6635205  | -2.0635293 |
| H | -1.5876090 | 2.5096211  | -2.0516811 |
| C | -1.6361108 | 5.7158596  | -0.6309150 |

$p_{dis.} = 15\gamma\text{-sim-mi}; \text{COSMO}$

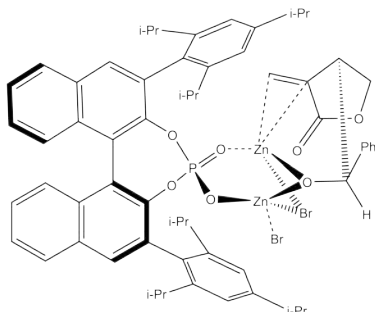



|    |            |            |            |
|----|------------|------------|------------|
| H  | -0.1817984 | 4.1361193  | -0.7731819 |
| H  | -1.2633279 | 6.2555045  | -1.5258769 |
| H  | -1.1929725 | 6.1929712  | 0.2670487  |
| H  | -2.7347960 | 5.8683545  | -0.5802079 |
| H  | 2.0804633  | -7.1024926 | -1.8248483 |
| H  | 5.3517111  | -3.3325417 | -3.9314614 |
| H  | 3.4725617  | -4.5665862 | 3.6938157  |
| C  | 1.6448680  | -6.2182363 | -2.3459021 |
| C  | 3.9961998  | -0.4791469 | -4.3176168 |
| H  | -0.3257629 | -7.1851430 | -2.4963288 |
| H  | 1.1049908  | -3.6535435 | 3.4669840  |
| C  | 2.2847578  | -4.9909247 | -1.6969060 |
| C  | 5.5920196  | -2.4958743 | -3.2423647 |
| C  | 0.1241832  | -6.2524670 | -2.0997424 |
| H  | -0.3759424 | -5.4004190 | -2.6031236 |
| C  | 2.9660703  | -4.0017599 | -2.4242900 |
| C  | 3.5388527  | -4.6643400 | 2.5902375  |
| H  | 3.0381167  | -6.3873290 | -4.0457364 |
| C  | 2.1997386  | -4.8262282 | -0.3000740 |
| C  | 1.9486742  | -6.3665780 | -3.8410017 |
| H  | 1.5133367  | -7.3089718 | -4.2297986 |
| H  | 1.6776537  | -5.5958996 | 0.2917305  |
| C  | 3.4311108  | -1.2524708 | -3.7575280 |
| H  | 6.1717184  | -1.7434283 | -3.8163626 |
| H  | 6.2461688  | -2.8972768 | -2.4416618 |
| C  | 3.5546022  | -2.8824738 | -1.8030568 |
| C  | 1.1665297  | -3.7888403 | 2.3674131  |
| C  | 2.7655980  | -3.7292167 | 0.3710905  |
| H  | 4.5994848  | -4.5286826 | 2.2976074  |
| H  | 3.2512696  | -5.7030826 | 2.3233999  |
| C  | 4.3121822  | -1.8689977 | -2.6574513 |
| C  | 3.4631200  | -2.7478337 | -0.3949293 |
| C  | 2.6225451  | -3.6413827 | 1.8923466  |
| H  | 2.5291474  | -0.7764607 | -3.3269185 |
| H  | 0.5286016  | -3.0220379 | 1.8887688  |
| H  | 3.0937295  | -2.0149797 | -4.4897323 |
| H  | -0.1310637 | -6.1994588 | -1.0232585 |
| H  | 0.7509350  | -4.7928113 | 2.1378561  |
| H  | 1.5064610  | -5.5325003 | -4.4251939 |
| H  | 4.6330366  | -1.0426420 | -1.9902071 |
| H  | 2.9535109  | -2.6307627 | 2.2043471  |
| H  | 3.0480269  | -4.0930470 | -3.5164766 |
| Zn | -1.2118025 | -0.0860271 | -2.8504881 |
| Br | -1.9122728 | 0.9812199  | -4.7668225 |
| C  | -6.2973791 | 1.6046613  | -3.0220255 |
| C  | -3.5458117 | -1.5518423 | -1.8971062 |
| C  | -5.4407651 | 1.7696629  | -1.9204083 |
| C  | -5.3585833 | -0.6043865 | -3.4061543 |
| C  | -4.5135591 | -0.4512713 | -2.2902689 |
| C  | -6.2509853 | 0.4166765  | -3.7684977 |
| C  | -4.5508842 | 0.7493768  | -1.5547028 |
| O  | -2.3251751 | -1.0260063 | -1.4560130 |
| H  | -6.9899034 | 2.4108798  | -3.3085988 |
| H  | -5.2949583 | -1.5188666 | -4.0177029 |
| H  | -5.4593570 | 2.7088738  | -1.3469538 |
| H  | -6.8994492 | 0.2898958  | -4.6488179 |
| H  | -3.8495317 | 0.8943501  | -0.7182068 |
| Br | -0.2891244 | -2.5761675 | -3.4015502 |
| Zn | -0.9298638 | -2.4223439 | -1.0977353 |
| H  | -6.0591815 | -3.4801411 | -0.3675157 |
| C  | -4.1413215 | -2.4531442 | -0.7282078 |
| C  | -5.3558534 | -3.2750642 | -1.1998576 |
| C  | -3.1788799 | -3.5375392 | -0.3784996 |
| C  | -2.1077874 | -3.5399189 | 0.4719294  |
| C  | -3.5866534 | -4.7657111 | -1.1648200 |
| O  | -4.8251374 | -4.5371088 | -1.6732310 |
| O  | -2.9677578 | -5.7930564 | -1.3256413 |
| H  | -5.9127927 | -2.8075702 | -2.0327281 |
| H  | -1.9296602 | -2.7016501 | 1.1666162  |
| H  | -1.5416763 | -4.4756421 | 0.6221498  |
| H  | -3.4062618 | -2.2276116 | -2.7800369 |

H -4.3660512 -1.7785494 0.1207102

$p_{dis.} = 15\gamma\text{-sim-mi}$

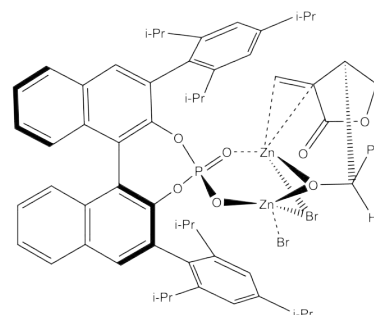

Energy (Hartree) = -11970.03504442

|   |            |            |            |
|---|------------|------------|------------|
| C | 1.4941934  | 1.9705995  | 1.0614146  |
| C | 2.8914708  | 2.0445357  | 0.9854541  |
| C | 3.4850007  | 3.3574419  | 0.9131685  |
| C | 4.8667923  | 3.5591555  | 0.6202759  |
| C | 2.6500548  | 4.5174003  | 1.1143689  |
| C | 3.2407726  | 5.8157331  | 1.0667132  |
| C | 1.2552186  | 4.3479676  | 1.3464650  |
| H | 0.6372187  | 5.2362615  | 1.5481702  |
| C | 0.6476617  | 3.0984243  | 1.2880981  |
| C | 4.0502223  | -1.5617927 | 0.3140340  |
| C | 5.1272207  | -1.6688495 | 1.1851724  |
| H | 5.6700050  | -2.6243676 | 1.2500964  |
| C | 5.4945099  | -0.6085776 | 2.0617979  |
| C | 6.5502431  | -0.7741770 | 3.0076340  |
| C | 4.7348914  | 0.6199368  | 2.0552464  |
| C | 5.0192070  | 1.5859501  | 3.0675369  |
| C | 3.7039420  | 0.7967688  | 1.0555698  |
| C | 3.4091602  | -0.2880332 | 0.2246410  |
| O | 0.8613092  | 0.7317807  | 1.0081596  |
| O | 2.4526644  | -0.1290238 | -0.7744135 |
| P | 0.8639774  | -0.1240066 | -0.3895305 |
| O | 0.1590399  | 0.5665338  | -1.5592745 |
| O | 0.3601967  | -1.5188967 | 0.0510956  |
| C | 4.5917349  | 5.9757621  | 0.7995835  |
| C | 5.4058534  | 4.8365517  | 0.5613021  |
| H | 2.5948755  | 6.6925455  | 1.2311762  |
| H | 5.0320458  | 6.9835320  | 0.7570940  |
| H | 5.5032208  | 2.6840442  | 0.4272525  |
| H | 6.4721001  | 4.9672014  | 0.3216348  |
| C | 6.0393233  | 1.3850053  | 3.9873209  |
| C | 6.8282453  | 0.2057013  | 3.9476159  |
| H | 4.4144960  | 2.5006242  | 3.1232941  |
| H | 6.2325999  | 2.1468723  | 4.7578775  |
| H | 7.6416795  | 0.0624246  | 4.6750277  |
| H | 7.1282760  | -1.7114839 | 2.9876475  |
| C | -1.7394010 | 3.4617682  | 0.5337715  |
| C | -0.8250058 | 2.9077368  | 1.4720017  |
| C | -3.1206328 | 3.2847962  | 0.7495099  |
| C | -1.3154800 | 2.1675565  | 2.5880922  |
| C | -2.7027353 | 2.0084897  | 2.7417201  |
| C | -3.6283990 | 2.5597313  | 1.8382135  |
| H | -3.8294703 | 3.7268569  | 0.0308928  |
| C | -0.3965061 | 1.5737133  | 3.6560593  |
| H | -3.0744877 | 1.4419049  | 3.6106510  |
| H | -0.5751685 | 0.0498886  | 3.7908207  |
| H | -1.5872576 | -0.2116741 | 4.1653149  |
| H | 0.1603675  | -0.3668878 | 4.5096359  |

|    |            |            |            |
|----|------------|------------|------------|
| H  | -0.4215733 | -0.4525858 | 2.8159549  |
| C  | -0.5875535 | 2.2891428  | 5.0067611  |
| H  | 0.6525299  | 1.7537093  | 3.3480598  |
| H  | -1.6156248 | 2.1468794  | 5.4007778  |
| H  | -0.4144978 | 3.3800511  | 4.9106463  |
| H  | 0.1201668  | 1.8935966  | 5.7644903  |
| C  | -5.1292145 | 2.3986814  | 2.0498833  |
| C  | -5.5525781 | 0.9220115  | 2.1420610  |
| H  | -6.6541093 | 0.8331797  | 2.2401961  |
| H  | -5.0989763 | 0.4238702  | 3.0240932  |
| H  | -5.2457104 | 0.3604522  | 1.2365788  |
| C  | -5.6042605 | 3.1932497  | 3.2805767  |
| H  | -5.6303565 | 2.8329704  | 1.1568698  |
| H  | -6.7052730 | 3.1223724  | 3.4004142  |
| H  | -5.3338314 | 4.2647691  | 3.1955021  |
| H  | -5.1383015 | 2.8040366  | 4.2100006  |
| C  | -1.2850994 | 4.2181655  | -0.7134570 |
| C  | -1.8376449 | 3.5824962  | -1.9983205 |
| H  | -1.4148770 | 4.0719860  | -2.8984875 |
| H  | -2.9421570 | 3.6542792  | -2.0711508 |
| H  | -1.5714970 | 2.5112393  | -2.0583916 |
| C  | -1.6421857 | 5.7133347  | -0.6283629 |
| H  | -0.1811564 | 4.1401352  | -0.7695728 |
| H  | -1.2685297 | 6.2567876  | -1.5204936 |
| H  | -1.2053594 | 6.1906113  | 0.2725925  |
| H  | -2.7413795 | 5.8627570  | -0.5815108 |
| H  | 2.0667474  | -7.0934982 | -1.8281487 |
| H  | 5.3346967  | -3.3419856 | -3.9338176 |
| H  | 3.4921878  | -4.5775277 | 3.6973479  |
| C  | 1.6179122  | -6.2053635 | -2.3314383 |
| H  | 3.9889338  | -0.4845790 | -4.3255956 |
| H  | -0.3582446 | -7.1683512 | -2.4554429 |
| H  | 1.1322993  | -3.6297401 | 3.4816920  |
| C  | 2.2705443  | -4.9827166 | -1.6862343 |
| C  | 5.8800867  | -2.5037242 | -3.2486533 |
| C  | 0.1029909  | -6.2440069 | -2.0531246 |
| H  | -0.4078716 | -5.3839490 | -2.5313401 |
| C  | 2.9481724  | -3.9947685 | -2.4183138 |
| C  | 3.5517240  | -4.6736993 | 2.5932942  |
| H  | 2.9734473  | -6.3603653 | -4.0627670 |
| C  | 2.2023887  | -4.8206756 | -0.2885385 |
| C  | 1.8888806  | -6.3398046 | -3.8340865 |
| H  | 1.4440825  | -7.2776877 | -4.2227591 |
| H  | 1.6852192  | -5.5902304 | 0.3077098  |
| C  | 3.4223594  | -1.2528961 | -3.7604405 |
| H  | 6.1610201  | -1.7559897 | -3.8274125 |
| H  | 6.2351226  | -2.9055961 | -2.4491561 |
| C  | 3.5480301  | -2.8794446 | -1.8017257 |
| C  | 1.1890209  | -3.7680534 | 2.3822306  |
| C  | 2.7779197  | -3.7266063 | 0.3785559  |
| H  | 4.6123343  | -4.5500758 | 2.2956977  |
| H  | 3.2525638  | -5.7089529 | 2.3261606  |
| C  | 4.3044998  | -1.8700321 | -2.6618580 |
| C  | 3.4702089  | -2.7459770 | -0.3927161 |
| C  | 2.6448239  | -3.6392697 | 1.9007924  |
| H  | 2.5252176  | -0.7690586 | -3.3290955 |
| H  | 0.5586761  | -2.9953541 | 1.9028582  |
| H  | 3.0775980  | -2.0150291 | -4.4894150 |
| H  | -0.1300161 | -6.2112413 | -0.9708314 |
| H  | 0.7610503  | -4.7679514 | 2.1568992  |
| H  | 1.4346412  | -5.4998484 | -4.4000710 |
| H  | 4.6306336  | -1.0432151 | -1.9977292 |
| H  | 2.9894522  | -2.6333087 | 2.2127326  |
| H  | 3.0178305  | -4.0839433 | -3.5113369 |
| Zn | -1.2029278 | -0.0732592 | -2.8792689 |
| Br | -1.9439033 | 0.9924314  | -4.7688349 |
| C  | -6.2861847 | 1.5960497  | -3.0334610 |
| C  | -3.5260376 | -1.5494566 | -1.9018087 |
| C  | -5.4364618 | 1.7619975  | -1.9272931 |
| C  | -5.3348636 | -0.6061844 | -3.4185394 |
| C  | -4.4970047 | -0.4526561 | -2.2977957 |

|    |            |            |            |
|----|------------|------------|------------|
| C  | -6.2298294 | 0.4112317  | -3.7830197 |
| C  | -4.5435106 | 0.7457160  | -1.5596376 |
| O  | -2.3058780 | -1.0239128 | -1.4681924 |
| H  | -6.9799005 | 2.4001777  | -3.3226105 |
| H  | -5.2589867 | -1.5163796 | -4.0351450 |
| H  | -5.4603600 | 2.6998179  | -1.3518823 |
| H  | -6.8703575 | 0.2853406  | -4.6690795 |
| H  | -3.8447472 | 0.8932466  | -0.7214433 |
| Br | -0.2978897 | -2.5863596 | -3.4364057 |
| Zn | -0.9000865 | -2.4173265 | -1.1339511 |
| H  | -6.0509484 | -3.4454411 | -0.3505766 |
| C  | -4.1223418 | -2.4409679 | -0.7234440 |
| C  | -5.3432568 | -3.2597245 | -1.1853738 |
| C  | -3.1648084 | -3.5268400 | -0.3688411 |
| C  | -2.0796325 | -3.5218818 | 0.4626187  |
| C  | -3.5867025 | -4.7640224 | -1.1343643 |
| O  | -4.8278369 | -4.5294296 | -1.6435146 |
| O  | -2.9789397 | -5.7982098 | -1.2786171 |
| H  | -5.8960613 | -2.7921493 | -2.0216225 |
| H  | -1.8794582 | -2.6740495 | 1.1390783  |
| H  | -1.5120080 | -4.4569881 | 0.6100231  |
| H  | -3.3911334 | -2.2328288 | -2.7803806 |
| H  | -4.3399193 | -1.7542701 | 0.1178697  |

### 15 $\nu$ -2-mi; COSMO

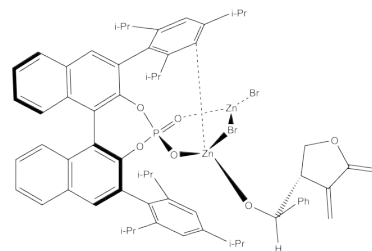

Energy (Hartree) = -11970.03525068

|   |            |            |            |
|---|------------|------------|------------|
| C | -0.6733458 | 1.0782673  | 90.1692167 |
| C | 0.2978254  | 0.1015958  | 90.4268790 |
| C | 0.3979951  | -0.3877130 | 91.7806652 |
| C | 1.4598654  | -1.2356870 | 92.2168685 |
| C | -0.5942037 | 0.0214773  | 92.7474613 |
| C | -0.5172466 | -0.4865003 | 94.0795499 |
| C | -1.6109728 | 0.9477863  | 92.3736359 |
| H | -2.3671650 | 1.2337299  | 93.1199188 |
| C | -1.6449084 | 1.5299940  | 91.1115405 |
| C | 2.5345247  | 0.1537557  | 87.2991092 |
| C | 2.7347497  | -1.2007177 | 87.0672231 |
| H | 3.3149220  | -1.5212281 | 86.1886929 |
| C | 2.1264432  | -2.1955397 | 87.8877482 |
| C | 2.2802879  | -3.5819960 | 87.5846741 |
| C | 1.2640258  | -1.8010978 | 88.9791701 |
| C | 0.5267549  | -2.8207792 | 89.6532342 |
| C | 1.1585296  | -0.3984142 | 89.3134512 |
| C | 1.8163581  | 0.5117564  | 88.4813365 |
| O | -0.7600458 | 1.6412307  | 88.8944061 |
| O | 1.7660798  | 1.8684622  | 88.8033657 |
| P | 0.3940655  | 2.6862870  | 88.4321485 |
| O | 0.4429335  | 3.9532494  | 89.3073400 |
| O | 0.1919458  | 2.8441364  | 86.9273821 |
| C | 0.5129860  | -1.3320073 | 94.4630565 |
| C | 1.5170867  | -1.6947645 | 93.5257599 |
| H | -1.2866633 | -0.1771990 | 94.8042324 |
| H | 0.5642334  | -1.7092897 | 95.4957046 |
| H | 2.2474063  | -1.5165549 | 91.5035049 |
| H | 2.3509516  | -2.3406133 | 93.8404842 |
| C | 0.6833833  | -4.1594752 | 89.3197509 |
| C | 1.5821299  | -4.5492270 | 88.2916517 |
| H | -0.1811793 | -2.5387467 | 90.4438645 |

|   |            |            |            |
|---|------------|------------|------------|
| H | 0.0997753  | -4.9241350 | 89.8546496 |
| H | 1.7050737  | -5.6143554 | 88.0433943 |
| H | 2.9511399  | -3.8671005 | 86.7591414 |
| C | -2.5094396 | 3.8969792  | 91.3132994 |
| C | -2.6173324 | 2.6038370  | 90.7254543 |
| C | -3.4484835 | 4.8835131  | 90.9542654 |
| C | -3.6219620 | 2.3522559  | 89.7462792 |
| C | -4.5194913 | 3.3822040  | 89.4116186 |
| C | -4.4650878 | 4.6515256  | 90.0144854 |
| H | -3.3799756 | 5.8814268  | 91.4164503 |
| C | -3.7876145 | 0.9968935  | 89.0585667 |
| H | -5.2898814 | 3.1831364  | 88.6501023 |
| C | -3.6292635 | 1.1035420  | 87.5293123 |
| H | -4.3722360 | 1.7912306  | 87.0765420 |
| H | -3.7563061 | 0.1070152  | 87.0575567 |
| H | -2.6248030 | 1.4823879  | 87.2596804 |
| C | -5.1296536 | 0.3455059  | 89.4443455 |
| H | -2.9883840 | 0.3231195  | 89.4299130 |
| H | -5.9898143 | 0.9467453  | 89.0830270 |
| H | -5.2278290 | 0.2446937  | 90.5445840 |
| H | -5.2166099 | -0.6659286 | 88.9960846 |
| C | -5.4687291 | 5.7413763  | 89.6584199 |
| C | -5.3419817 | 6.1776846  | 88.1877531 |
| H | -6.0527861 | 6.9985616  | 87.9586018 |
| H | -5.5585465 | 5.3383003  | 87.4957340 |
| H | -4.3172575 | 6.5354950  | 87.9611003 |
| C | -6.9095518 | 5.3115944  | 89.9897147 |
| H | -5.2261145 | 6.6207744  | 90.2950591 |
| H | -7.6225225 | 6.1382381  | 89.7903675 |
| H | -7.0098431 | 5.0182001  | 91.0543735 |
| H | -7.2224694 | 4.4455857  | 89.3696974 |
| C | -1.4022294 | 4.2591079  | 92.3039988 |
| C | -0.7418649 | 5.6114462  | 91.9830998 |
| H | 0.1719129  | 5.7549566  | 92.5938325 |
| H | -1.4172896 | 6.4670342  | 92.1902214 |
| H | -0.4445426 | 5.6659129  | 90.9180370 |
| C | -1.9173644 | 4.2504769  | 93.7561218 |
| H | -0.6124470 | 3.4850613  | 92.2162408 |
| H | -1.0985570 | 4.4892222  | 94.4661226 |
| H | -2.3399619 | 3.2666810  | 94.0406484 |
| H | -2.7176723 | 5.0078862  | 93.8928876 |
| H | 2.4083017  | 4.8755005  | 83.2035903 |
| H | 6.6543077  | 2.6424025  | 86.7170692 |
| H | 0.6668108  | -1.4408288 | 83.5688443 |
| C | 3.4258902  | 4.4784920  | 83.4212722 |
| H | 5.3132407  | 3.2847502  | 89.5231655 |
| H | 4.3042374  | 6.4391985  | 83.0888067 |
| H | -1.1697460 | 0.1635711  | 84.1832504 |
| C | 3.2299632  | 3.3955918  | 84.4773132 |
| C | 6.2350702  | 1.8189128  | 87.3319998 |
| C | 4.3131100  | 5.6460102  | 83.8628698 |
| H | 5.3687845  | 5.3308476  | 84.0008022 |
| C | 4.0527930  | 3.2398623  | 85.6065035 |
| C | 1.4225019  | -0.6544858 | 83.7709932 |
| H | 3.2950364  | 3.0434319  | 81.7471880 |
| C | 2.1912368  | 2.4455527  | 84.2889152 |
| C | 3.9549215  | 3.8548484  | 82.1133437 |
| H | 4.0175626  | 4.6256422  | 81.3184270 |
| H | 1.5534342  | 2.5401704  | 83.3958815 |
| C | 4.6854352  | 3.3786626  | 88.6143200 |
| H | 6.8800717  | 1.7069686  | 88.2273175 |
| H | 6.3037553  | 0.8850350  | 86.7383488 |
| C | 3.8692312  | 2.1871649  | 86.5265600 |
| C | -0.4286167 | 0.9655884  | 84.3752047 |
| C | 1.9968489  | 1.3494194  | 85.1604389 |
| H | 2.3585880  | -1.1523683 | 84.0934152 |
| H | 1.6342174  | -0.1307167 | 82.8153415 |
| C | 4.7808889  | 2.1109583  | 87.7473156 |
| C | 2.8494224  | 1.2251479  | 86.2979956 |
| C | 0.8998844  | 0.3376366  | 84.8312664 |
| H | 3.6444458  | 3.5443881  | 88.9563096 |

|    |            |            |            |
|----|------------|------------|------------|
| H  | -0.8481262 | 1.6365402  | 85.1484738 |
| H  | 5.0176982  | 4.2864322  | 88.0703336 |
| H  | 3.9643167  | 6.0969852  | 84.8129868 |
| H  | -0.3270092 | 1.5538623  | 83.4411839 |
| H  | 4.9694906  | 3.4288105  | 82.2616496 |
| H  | 4.4382291  | 1.2566680  | 88.3669200 |
| H  | 0.6864233  | -0.2369405 | 85.7546936 |
| H  | 4.8546745  | 3.9688902  | 85.7907491 |
| Zn | 1.6711292  | 5.4392793  | 89.1227619 |
| Br | 2.9646479  | 6.4145489  | 90.7356796 |
| C  | 1.0840820  | 8.1161261  | 80.8071080 |
| C  | -0.9935871 | 5.3470414  | 83.4612995 |
| C  | 1.4942057  | 7.9668631  | 82.1446981 |
| C  | -0.6922600 | 6.4963451  | 81.1904707 |
| C  | -0.2913358 | 6.3386162  | 82.5303779 |
| C  | -0.0123795 | 7.3794705  | 80.3328001 |
| C  | 0.8115858  | 7.0858950  | 82.9951213 |
| O  | -0.1054982 | 4.3796240  | 83.9030675 |
| H  | 1.6201815  | 8.8062172  | 80.1373167 |
| H  | -1.5442676 | 5.9086054  | 80.8106250 |
| H  | 2.3521990  | 8.5421242  | 82.5269744 |
| H  | -0.3388787 | 7.4867889  | 79.2865321 |
| H  | 1.1449226  | 6.9696826  | 84.0386854 |
| Br | 1.8182924  | 5.9964646  | 86.7566634 |
| Zn | 0.7646000  | 4.0451738  | 85.4980016 |
| H  | -2.9342556 | 7.0412334  | 82.9148827 |
| C  | -1.7645369 | 6.1416023  | 84.5893458 |
| C  | -3.0297141 | 6.7845365  | 83.9876002 |
| C  | -2.3977303 | 5.2558587  | 85.6242340 |
| C  | -1.9754726 | 4.9079012  | 86.8557726 |
| C  | -3.7631916 | 4.9041816  | 85.1184555 |
| O  | -4.0705893 | 5.7817829  | 84.1112409 |
| O  | -4.5392595 | 4.0478897  | 85.4925331 |
| H  | -3.3431874 | 7.6900752  | 84.5487991 |
| H  | -2.5979762 | 4.2668165  | 87.5010285 |
| H  | -1.0277869 | 5.2822935  | 87.2692163 |
| H  | -1.0812332 | 6.8888472  | 85.0404463 |
| H  | -1.7925969 | 4.8396253  | 82.8614787 |

### 15 $\nu$ -2-mi

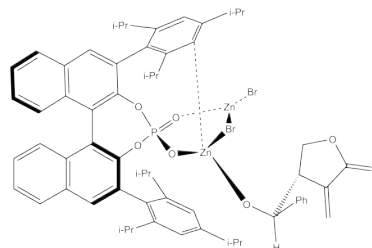

Energy (Hartree) = -11970.02247891

|   |            |            |            |
|---|------------|------------|------------|
| C | -0.6595786 | 1.0858536  | 90.1722332 |
| C | 0.3006111  | 0.0991234  | 90.4325664 |
| C | 0.3919510  | -0.3891550 | 91.7870925 |
| C | 1.4415897  | -1.2503935 | 92.2259767 |
| C | -0.5960382 | 0.0347850  | 92.7518328 |
| C | -0.5257353 | -0.4712575 | 94.0844825 |
| C | -1.6031125 | 0.9698922  | 92.3737160 |
| H | -2.3603074 | 1.2637966  | 93.1158418 |
| C | -1.6305752 | 1.5477249  | 91.1099200 |
| C | 2.5316013  | 0.1348039  | 87.3008427 |
| C | 2.7114806  | -1.2211852 | 87.0617313 |
| H | 3.2794829  | -1.5441075 | 86.1760516 |
| C | 2.0968783  | -2.2123113 | 87.8818843 |
| C | 2.2318339  | -3.5990120 | 87.5731271 |
| C | 1.2457981  | -1.8124225 | 88.9802268 |
| C | 0.5015830  | -2.8260915 | 89.6551809 |
| C | 1.1574709  | -0.4100567 | 89.3197803 |
| C | 1.8249077  | 0.4949976  | 88.4897682 |
| O | -0.7362473 | 1.6510749  | 88.8981830 |

|   |            |            |            |    |            |            |            |
|---|------------|------------|------------|----|------------|------------|------------|
| O | 1.7915151  | 1.8493782  | 88.8184841 | H  | 1.5458338  | 2.5494387  | 83.4171347 |
| P | 0.4309961  | 2.6850949  | 88.4458857 | C  | 4.6927307  | 3.3465952  | 88.6404582 |
| O | 0.4949696  | 3.9491156  | 89.3228059 | H  | 6.8847660  | 1.6781379  | 88.2212398 |
| O | 0.2382322  | 2.8468853  | 86.9403915 | H  | 6.2971694  | 0.8725205  | 86.7279538 |
| C | 0.4924067  | -1.3292594 | 94.4707979 | C  | 3.8635486  | 2.1751392  | 86.5429735 |
| C | 1.4915208  | -1.7077480 | 93.5353265 | C  | -0.4346160 | 0.9759362  | 84.3998696 |
| H | -1.2913284 | -0.1500323 | 94.8079992 | C  | 1.9990885  | 1.3395523  | 85.1649860 |
| H | 0.5378103  | -1.7044378 | 95.5044171 | H  | 2.3413756  | -1.1485007 | 84.0522459 |
| H | 2.2248508  | -1.5428757 | 91.5126517 | H  | 1.6107816  | -0.1023920 | 82.7989909 |
| H | 2.3161966  | -2.3643461 | 93.8518183 | C  | 4.7813167  | 2.0885850  | 87.7592037 |
| C | 0.6410947  | -4.1648507 | 89.3161482 | C  | 2.8497692  | 1.2088939  | 86.3034471 |
| C | 1.5277917  | -4.5607568 | 88.2807884 | C  | 0.8969050  | 0.3349069  | 84.8295432 |
| H | -0.1970750 | -2.5376390 | 90.4515972 | H  | 3.6567909  | 3.4995660  | 89.0030482 |
| H | 0.0526092  | -4.9247217 | 89.8524214 | H  | -0.8414837 | 1.6351485  | 85.1895743 |
| H | 1.6369119  | -5.6261289 | 88.0274145 | H  | 5.0098976  | 4.2632278  | 88.1025051 |
| H | 2.8936849  | -3.8887707 | 86.7419439 | H  | 3.9411977  | 6.1010113  | 84.8643407 |
| C | -2.4880469 | 3.9226071  | 91.2657690 | H  | -0.3425538 | 1.5808341  | 83.4754895 |
| C | -2.6029881 | 2.6166858  | 90.709520  | H  | 4.9650815  | 3.4595422  | 82.2936651 |
| C | -3.4319107 | 4.8997207  | 90.8950331 | H  | 4.4422022  | 1.2280473  | 88.3722175 |
| C | -3.6140020 | 2.3437662  | 89.7431330 | H  | 0.6910007  | -0.2551907 | 85.7448413 |
| C | -4.5143255 | 3.3659250  | 89.3934012 | H  | 4.8349056  | 3.9727052  | 85.8284454 |
| C | -4.4573699 | 4.6465707  | 89.9707219 | Zn | 1.7621535  | 5.4074125  | 89.1685073 |
| H | -3.3590250 | 5.9079152  | 91.3331970 | Br | 3.0324680  | 6.3846965  | 90.7839998 |
| C | -3.7785912 | 0.9758820  | 89.0806600 | C  | 1.0411236  | 8.1887426  | 80.8404143 |
| H | -5.2870176 | 3.1518224  | 88.6385186 | C  | -0.9727033 | 5.3528287  | 83.4705591 |
| C | -3.6141589 | 1.0545093  | 87.5503397 | C  | 1.4593401  | 8.0308834  | 82.1740487 |
| H | -4.3538446 | 1.7335930  | 87.0800974 | C  | -0.7007056 | 6.5300313  | 81.2095069 |
| H | -3.7383700 | 0.0494940  | 87.0963142 | C  | -0.2925508 | 6.3644982  | 82.5457749 |
| H | -2.6086051 | 1.4284776  | 87.2781056 | C  | -0.0417080 | 7.4366483  | 80.3608855 |
| C | -5.1220127 | 0.3321274  | 89.4735585 | C  | 0.7976519  | 7.1266993  | 83.0158546 |
| H | -2.9811417 | 0.3087258  | 89.4680483 | O  | -0.0582705 | 4.4157425  | 83.9220627 |
| H | -5.9808660 | 0.9257754  | 89.0974271 | H  | 1.5609880  | 8.8972363  | 80.1772809 |
| H | -5.2253385 | 0.2526924  | 90.5749246 | H  | -1.5404328 | 5.9278579  | 80.8251003 |
| H | -5.2079675 | -0.6874582 | 89.0441407 | H  | 2.3075559  | 8.6177155  | 82.5603988 |
| C | -5.4665998 | 5.7270761  | 89.6022660 | H  | -0.3731464 | 7.5497038  | 79.3169101 |
| C | -5.3538566 | 6.1365998  | 88.1228576 | H  | 1.1376399  | 7.0015180  | 84.0563058 |
| H | -6.0693777 | 6.9506180  | 87.8842914 | Br | 1.8123149  | 6.0414807  | 86.8118278 |
| H | -5.5723788 | 5.2846174  | 87.4472232 | Zn | 0.7597390  | 4.0981777  | 85.5444623 |
| H | -4.3323020 | 6.4939745  | 87.8820081 | H  | -2.9771851 | 6.9656711  | 82.9108161 |
| C | -6.9031080 | 5.3001148  | 89.9545362 | C  | -1.7750610 | 6.1271353  | 84.5925385 |
| H | -5.2209272 | 6.6187995  | 90.2206913 | C  | -3.0662862 | 6.7123569  | 83.9852346 |
| H | -7.6204569 | 6.1209612  | 89.7474164 | C  | -2.3728543 | 5.2287189  | 85.6363596 |
| H | -6.9927270 | 5.0243572  | 91.0246322 | C  | -1.9373860 | 4.9080586  | 86.8709573 |
| H | -7.2197977 | 4.4228145  | 89.3529027 | C  | -3.7271070 | 4.8194579  | 85.1365519 |
| C | -1.3630524 | 4.3075393  | 92.2274639 | O  | -4.0647503 | 5.6742174  | 84.1165397 |
| C | -0.7342680 | 5.6702033  | 91.8853160 | O  | -4.4681102 | 3.9431911  | 85.5272238 |
| H | 0.2107332  | 5.8190091  | 92.4447594 | H  | -3.4126575 | 7.6119620  | 84.5381477 |
| H | -1.4060941 | 6.5164657  | 92.1376522 | H  | -2.5373470 | 4.2497818  | 87.5204744 |
| H | -0.5002134 | 5.7400955  | 90.8049015 | H  | -1.0066433 | 5.3239842  | 87.2840913 |
| C | -1.8381740 | 4.2980156  | 93.6929333 | H  | -1.1193993 | 6.9047288  | 85.0338686 |
| H | -0.5629590 | 3.5460799  | 92.1213459 | H  | -1.7516792 | 4.8194808  | 82.8671730 |
| H | -1.0070963 | 4.5629279  | 94.3788574 |    |            |            |            |
| H | -2.2277138 | 3.3067234  | 93.9968093 |    |            |            |            |
| H | -2.6536523 | 5.0357980  | 93.8453846 |    |            |            |            |
| H | 2.3936847  | 4.8856627  | 83.2392674 |    |            |            |            |
| H | 6.6488970  | 2.6285409  | 86.7224530 |    |            |            |            |
| H | 0.6438728  | -1.4204272 | 83.5374779 |    |            |            |            |
| C | 3.4124727  | 4.4922851  | 83.4573653 |    |            |            |            |
| H | 5.3344309  | 3.2500459  | 89.5391699 |    |            |            |            |
| H | 4.2795209  | 6.4612432  | 83.1440051 |    |            |            |            |
| H | -1.1827394 | 0.1816300  | 84.2033809 |    |            |            |            |
| C | 3.2185580  | 3.3995011  | 84.5044040 |    |            |            |            |
| C | 6.2328068  | 1.7997221  | 87.3322216 |    |            |            |            |
| C | 4.2927204  | 5.6606488  | 83.9103607 |    |            |            |            |
| H | 5.3506257  | 5.3512354  | 84.0452863 |    |            |            |            |
| C | 4.0391561  | 3.2391863  | 85.6354351 |    |            |            |            |
| C | 1.4044000  | -0.6408658 | 83.7475440 |    |            |            |            |
| H | 3.2946633  | 3.0701256  | 81.7719471 |    |            |            |            |
| C | 2.1910002  | 2.4420862  | 84.3031418 |    |            |            |            |
| C | 3.9489174  | 3.8821256  | 82.1463627 |    |            |            |            |
| H | 4.0093221  | 4.6588320  | 81.3571613 |    |            |            |            |

### 6.3 Transition States for Product formation

TS $\epsilon$ -ma

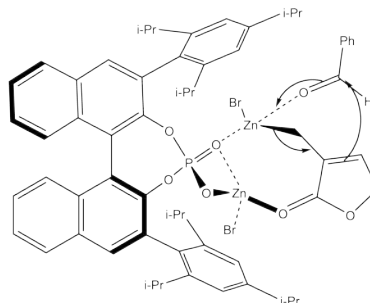

Energy (Hartree) = -11970.01085984  
number of imaginary frequencies: 1

|   |            |            |            |
|---|------------|------------|------------|
| C | 0.7679499  | 2.4808849  | 0.6864436  |
| C | 2.1649205  | 2.4725810  | 0.7044706  |
| C | 2.8369230  | 3.7516369  | 0.7255674  |
| C | 4.2490916  | 3.8795874  | 0.5624857  |
| C | 2.0556642  | 4.9554730  | 0.8812788  |
| C | 2.7199216  | 6.2176554  | 0.9183985  |
| C | 0.6388975  | 4.8637179  | 0.9983287  |
| H | 0.0573523  | 5.7785463  | 1.1906544  |
| C | -0.0267183 | 3.6500236  | 0.8849274  |
| C | 3.5302613  | -0.9129349 | -0.5011205 |
| C | 4.5403596  | -1.1406097 | 0.4235302  |
| H | 5.2109957  | -2.0020506 | 0.2862951  |
| C | 4.7261245  | -0.2951821 | 1.5558578  |
| C | 5.7013722  | -0.6010056 | 2.5506358  |
| C | 3.9112733  | 0.8856801  | 1.7115588  |
| C | 4.0773355  | 1.6748482  | 2.8873567  |
| C | 2.9321400  | 1.1951193  | 0.6980606  |
| C | 2.7246122  | 0.2463026  | -0.3004811 |
| O | 0.0665883  | 1.2776045  | 0.5616291  |
| O | 1.7111159  | 0.4640910  | -1.2433973 |
| P | 0.1562710  | 0.3784343  | -0.7973623 |
| O | -0.6460400 | 0.8699501  | -2.0230772 |
| O | -0.4020862 | -1.0160439 | -0.3730760 |
| C | 4.0963050  | 6.3043053  | 0.7777671  |
| C | 4.8622058  | 5.1243298  | 0.5851012  |
| H | 2.1119759  | 7.1266308  | 1.0493164  |
| H | 4.5949344  | 7.2851577  | 0.8017298  |
| H | 4.8527715  | 2.9753283  | 0.4046277  |
| H | 5.9518086  | 5.1961338  | 0.4472781  |
| C | 5.0221792  | 1.3376736  | 3.8460471  |
| C | 5.8518385  | 0.1987680  | 3.6729710  |
| H | 3.4300884  | 2.5495497  | 3.0402144  |
| H | 5.1218195  | 1.9539025  | 4.7525401  |
| H | 6.6007395  | -0.0562706 | 4.4381006  |
| H | 6.3218774  | -1.5009312 | 2.4172299  |
| C | -2.4104636 | 3.5585579  | -0.0022540 |
| C | -1.5042027 | 3.5077902  | 1.0934187  |
| C | -3.7783691 | 3.3714352  | 0.2527165  |
| C | -1.9815889 | 3.2792149  | 2.4103370  |
| C | -3.3646024 | 3.0854815  | 2.6071683  |
| C | -4.2803915 | 3.1240564  | 1.5449556  |
| H | -4.4887631 | 3.4098682  | -0.5874732 |
| C | -1.0461578 | 3.2467149  | 3.6197008  |
| H | -3.7259126 | 2.9000396  | 3.6295264  |
| C | -0.9782405 | 1.8540933  | 4.2701487  |
| H | -1.9779822 | 1.5165820  | 4.6164734  |
| H | -0.3071517 | 1.8690424  | 5.1534896  |
| H | -0.5760810 | 1.0936584  | 3.5720530  |
| C | -1.4210215 | 4.3346854  | 4.6426316  |
| H | -0.0241750 | 3.4823741  | 3.2599624  |
| H | -2.4225583 | 4.1544373  | 5.0861971  |
| H | -1.4390987 | 5.3398652  | 4.1743213  |
| H | -0.6886412 | 4.3559199  | 5.4758215  |
| C | -5.7755641 | 2.8737584  | 1.7284789  |
| C | -6.1505556 | 1.4585645  | 1.2429054  |
| H | -7.2436050 | 1.2841628  | 1.3254091  |
| H | -5.6329852 | 0.6915699  | 1.8572061  |
| H | -5.8589121 | 1.3020079  | 0.1853725  |
| C | -6.2821493 | 3.1114146  | 3.1561816  |
| H | -6.2983855 | 3.5969510  | 1.0623339  |
| H | -7.3874920 | 3.0332932  | 3.1944297  |
| H | -5.9963764 | 4.1143507  | 3.5320538  |
| H | -5.8787308 | 2.3571280  | 3.8640435  |
| C | -1.9170363 | 3.8584798  | -1.4161458 |
| C | -2.7731937 | 3.2187933  | -2.5192489 |
| H | -2.2558553 | 3.2976086  | -3.4960873 |
| H | -3.7555357 | 3.7246174  | -2.6271770 |
| H | -2.9600341 | 2.1480744  | -2.3140722 |
| C | -1.7990202 | 5.3789678  | -1.6416060 |
| H | -0.8987669 | 3.4246863  | -1.5046644 |
| H | -1.4161054 | 5.5964800  | -2.6601944 |

|    |            |            |            |
|----|------------|------------|------------|
| H  | -1.1113252 | 5.8512707  | -0.9134724 |
| H  | -2.7904537 | 5.8671361  | -1.5362103 |
| H  | 1.9353756  | -4.9701987 | -5.0168007 |
| H  | 5.8387309  | -0.5974748 | -4.7669205 |
| H  | 2.7545149  | -4.7653608 | 1.3660614  |
| C  | 2.2698201  | -3.9589067 | -5.3382889 |
| H  | 4.2432368  | 2.0469986  | -3.9588344 |
| H  | 0.6864134  | -3.8162674 | -6.8601657 |
| H  | 0.3145745  | -4.4321407 | 0.6253104  |
| C  | 2.6975391  | -3.2180364 | -4.0777506 |
| C  | 5.9033164  | -0.1966127 | -3.7337996 |
| C  | 1.0572532  | -3.2532965 | -5.9781504 |
| H  | 1.3330792  | -2.2326546 | -6.3178628 |
| C  | 3.4303582  | -2.0210919 | -4.1353964 |
| C  | 3.1083399  | -4.4342730 | 0.3680756  |
| H  | 4.2847859  | -4.6485465 | -5.8895465 |
| C  | 2.2879474  | -3.6764481 | -2.8146947 |
| C  | 3.4101263  | -4.1470678 | -6.3507325 |
| H  | 3.0732610  | -4.7621772 | -7.2103867 |
| H  | 1.7076167  | -4.6103216 | -2.7614945 |
| C  | 3.7049056  | 1.0768996  | -3.9278527 |
| H  | 6.4731155  | 0.7545809  | -3.7811242 |
| H  | 6.4892083  | -0.9196780 | -3.1309910 |
| C  | 3.7348005  | -1.2768529 | -2.9814374 |
| C  | 0.7117152  | -4.2221481 | -0.3868632 |
| C  | 2.5614588  | -2.9709588 | -1.6288499 |
| H  | 4.0837849  | -3.9294148 | 0.5070901  |
| H  | 3.2821699  | -5.3355158 | -0.2568864 |
| C  | 4.5074120  | 0.0335605  | -3.1277396 |
| C  | 3.2925357  | -1.7550783 | -1.7179265 |
| C  | 2.0676307  | -3.5076875 | -0.2887178 |
| H  | 2.7089348  | 1.2467335  | -3.4738628 |
| H  | -0.0323312 | -3.6059001 | -0.9302403 |
| H  | 3.5480888  | 0.7479412  | -4.9764700 |
| H  | 0.2224003  | -3.1492498 | -5.2556336 |
| H  | 0.7917256  | -5.1960910 | -0.9132727 |
| H  | 3.7568305  | -3.1761857 | -6.7622313 |
| H  | 4.6640220  | 0.4486950  | -2.1108553 |
| H  | 1.9348552  | -2.6361521 | 0.3879617  |
| H  | 3.7609403  | -1.6377734 | -5.1136837 |
| Zn | -1.9089371 | -0.6725160 | -2.0916382 |
| Br | -2.4690500 | -2.5328277 | -3.2921219 |
| C  | -4.6357388 | -7.4528020 | 1.5053227  |
| C  | -2.6699205 | -3.6727510 | 0.8808706  |
| C  | -3.9350220 | -6.8415709 | 2.5623145  |
| C  | -4.0374362 | -5.6038887 | 0.0431418  |
| C  | -3.3506151 | -4.9785929 | 1.1061960  |
| C  | -4.6792897 | -6.8360389 | 0.2447498  |
| C  | -3.2915036 | -5.6143047 | 2.3650851  |
| O  | -1.6627121 | -3.3601490 | 1.6241961  |
| H  | -5.1378488 | -8.4195807 | 1.6633329  |
| H  | -4.0348889 | -5.1346437 | -0.9547541 |
| H  | -3.8860965 | -7.3339717 | 3.5458277  |
| H  | -5.2053410 | -7.3226532 | -0.5908300 |
| H  | -2.7211400 | -5.1305621 | 3.1726431  |
| Br | 1.1477006  | -1.2869008 | 2.9127659  |
| Zn | -0.7264457 | -1.6409707 | 1.5790091  |
| H  | -5.4283367 | -3.4339682 | -0.0430915 |
| H  | -2.5324116 | -0.6845486 | 3.1425265  |
| C  | -4.2209394 | -2.3978413 | 1.5011177  |
| C  | -5.3148318 | -2.4571578 | 0.4705293  |
| H  | -4.3690596 | -2.8448348 | 2.4942793  |
| C  | -3.5461114 | -1.1621710 | 1.3060038  |
| C  | -2.5641528 | -0.5078659 | 2.0554997  |
| C  | -3.8917717 | -0.7711475 | -0.0812158 |
| O  | -4.9245531 | -1.4848371 | -0.5355151 |
| O  | -3.3159416 | 0.0597087  | -0.8067879 |
| H  | -6.3085803 | -2.1532772 | 0.8667630  |
| H  | -2.2398202 | 0.4903081  | 1.7141535  |
| H  | -2.6696072 | -3.3485350 | -0.1910221 |

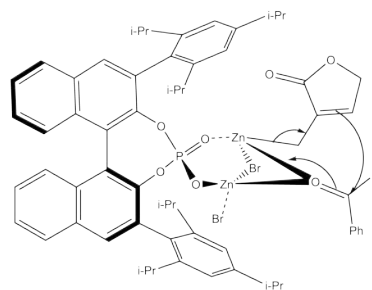

Energy (Hartree) = -11970.03838186

|   |            |            |            |
|---|------------|------------|------------|
| C | 1.2661380  | 1.9603115  | 0.9591437  |
| C | 2.6666427  | 1.9668049  | 0.9658269  |
| C | 3.3256437  | 3.2495989  | 0.9728202  |
| C | 4.7317973  | 3.3905237  | 0.7745466  |
| C | 2.5342118  | 4.4432079  | 1.1556762  |
| C | 3.1866219  | 5.7128300  | 1.1789068  |
| C | 1.1220919  | 4.3348730  | 1.3100873  |
| H | 0.5372410  | 5.2453247  | 1.5124084  |
| C | 0.4619313  | 3.1164956  | 1.1874956  |
| C | 3.7167731  | -1.6619359 | 0.2307399  |
| C | 4.7143844  | -1.8534603 | 1.1780056  |
| H | 5.2226667  | -2.8280170 | 1.2342063  |
| C | 5.0517294  | -0.8475167 | 2.1279095  |
| C | 6.0214982  | -1.0979619 | 3.1450809  |
| C | 4.3510751  | 0.4153777  | 2.1112020  |
| C | 4.6004907  | 1.3323179  | 3.1774339  |
| C | 3.4090127  | 0.6764588  | 1.0451680  |
| C | 3.1281462  | -0.3627943 | 0.1532217  |
| O | 0.5822778  | 0.7579636  | 0.8099144  |
| O | 2.2523921  | -0.1246642 | -0.9037471 |
| P | 0.6402023  | -0.0154814 | -0.6312746 |
| O | 0.0911407  | 0.8308110  | -1.7914949 |
| O | -0.0164014 | -1.3738952 | -0.3352548 |
| C | 4.5582901  | 5.8135249  | 0.9996146  |
| C | 5.3326884  | 4.6418879  | 0.7834965  |
| H | 2.5740012  | 6.6157713  | 1.3290292  |
| H | 5.0470961  | 6.7996068  | 1.0115626  |
| H | 5.3383931  | 2.4906275  | 0.5991512  |
| H | 6.4172704  | 4.7268846  | 0.6160443  |
| C | 5.5350203  | 1.0499206  | 4.1647257  |
| C | 6.2689728  | -0.1656138 | 4.1410297  |
| H | 4.0363389  | 2.2733326  | 3.2221060  |
| H | 5.7025653  | 1.7742715  | 4.9764733  |
| H | 7.0146586  | -0.3736203 | 4.9234304  |
| H | 6.5561348  | -2.0608061 | 3.1332599  |
| C | -1.8892568 | 3.6336405  | 0.4053118  |
| C | -1.0226099 | 2.9973178  | 1.3387903  |
| C | -3.2768245 | 3.6052693  | 0.6395766  |
| C | -1.5734667 | 2.2765773  | 2.4380999  |
| C | -2.9704522 | 2.2573665  | 2.6065159  |
| C | -3.8427760 | 2.9322806  | 1.7367697  |
| H | -3.9468106 | 4.1114926  | -0.0748775 |
| C | -0.7196587 | 1.5350864  | 3.4670396  |
| H | -3.3851903 | 1.7016532  | 3.4607649  |
| C | -1.0285942 | 0.0252119  | 3.4763028  |
| H | -2.0744836 | -0.1813236 | 3.7848472  |
| H | -0.3615360 | -0.5023153 | 4.1893508  |
| H | -0.8778864 | -0.4234192 | 2.4760585  |
| C | -0.8687722 | 2.1555141  | 4.8691298  |
| H | 0.3451008  | 1.6516149  | 3.1831064  |
| H | -1.9059879 | 2.0557926  | 5.2518981  |
| H | -0.6150005 | 3.2351862  | 4.8610871  |
| H | -0.1963602 | 1.6493401  | 5.5923595  |
| C | -5.3480553 | 2.9782314  | 1.9772279  |
| C | -5.9100586 | 1.6955305  | 2.6089737  |
| H | -7.0186577 | 1.7096626  | 2.6016802  |

$TS_{fav.} = TS_{\gamma\text{-ma}}$ ; COSMO

|    |            |            |            |    |            |            |            |
|----|------------|------------|------------|----|------------|------------|------------|
| H  | -5.5937675 | 1.5903538  | 3.6674924  | Zn | -1.0284959 | -2.3934912 | -1.6781304 |
| H  | -5.5675952 | 0.7849414  | 2.0766910  | H  | -5.5927555 | -0.4917537 | 0.0261273  |
| C  | -5.7182706 | 4.2167277  | 2.8178261  | H  | -2.7756476 | -4.1954919 | -2.0337266 |
| H  | -5.8299114 | 3.1073711  | 0.9812424  | C  | -4.4540486 | -2.0628034 | -1.0416625 |
| H  | -6.8171853 | 4.2927287  | 2.9540837  | C  | -5.3135917 | -1.5633513 | 0.0880613  |
| H  | -5.3631578 | 5.1505393  | 2.3375050  | H  | -4.8570948 | -2.2047930 | -2.0542069 |
| H  | -5.2511081 | 4.1568037  | 3.8231268  | C  | -3.4519925 | -2.8653966 | -0.4792493 |
| C  | -1.3723500 | 4.2974100  | -0.8702173 | C  | -2.4897665 | -3.7248963 | -1.0764532 |
| C  | -1.9963284 | 3.6592054  | -2.1232531 | C  | -3.4482142 | -2.5620729 | 1.0008348  |
| H  | -1.5323467 | 4.0615386  | -3.0460441 | O  | -4.5293459 | -1.7641799 | 1.2770258  |
| H  | -3.0891281 | 3.8409110  | -2.1896375 | O  | -2.6701542 | -2.9315044 | 1.8519294  |
| H  | -1.8377651 | 2.5640224  | -2.1307631 | H  | -6.2559341 | -2.1487503 | 0.1752396  |
| C  | -1.5845105 | 5.8214756  | -0.8539640 | H  | -1.9537977 | -4.3829950 | -0.3677194 |
| H  | -0.2813121 | 4.1090505  | -0.9260837 | H  | -3.0221398 | -0.0760692 | -0.5278478 |
| H  | -1.1714214 | 6.2845266  | -1.7737514 |    |            |            |            |
| H  | -1.0909893 | 6.2948704  | 0.0192314  |    |            |            |            |
| H  | -2.6640498 | 6.0768280  | -0.8054582 |    |            |            |            |
| H  | 1.7495737  | -6.9613834 | -2.4525534 |    |            |            |            |
| H  | 5.5651360  | -3.3543331 | -3.8879592 |    |            |            |            |
| H  | 2.6031993  | -4.6234498 | 3.3407925  |    |            |            |            |
| C  | 1.4875440  | -6.0266224 | -3.0005677 |    |            |            |            |
| H  | 4.5324884  | -0.3749718 | -4.2192455 |    |            |            |            |
| H  | -0.4883975 | -6.8175655 | -3.5455916 |    |            |            |            |
| H  | 0.2486519  | -3.7982938 | 2.8372400  |    |            |            |            |
| C  | 2.0983405  | -4.8791108 | -2.1948653 |    |            |            |            |
| C  | 5.7733005  | -2.5991373 | -3.1011455 |    |            |            |            |
| C  | -0.0523146 | -5.9393678 | -3.0265457 |    |            |            |            |
| H  | -0.3828961 | -5.0258872 | -3.5636033 |    |            |            |            |
| C  | 2.9771770  | -3.9338957 | -2.7476105 |    |            |            |            |
| C  | 2.8196112  | -4.6831972 | 2.2539761  |    |            |            |            |
| H  | 3.1429047  | -6.2654459 | -4.4341740 |    |            |            |            |
| C  | 1.7772657  | -4.7501855 | -0.8279084 |    |            |            |            |
| C  | 2.0397428  | -6.1566337 | -4.4245127 |    |            |            |            |
| H  | 1.6081117  | -7.0461653 | -4.9259226 |    |            |            |            |
| H  | 1.1050775  | -5.4926172 | -0.3685700 |    |            |            |            |
| C  | 3.8234223  | -1.1163071 | -3.7961389 |    |            |            |            |
| H  | 6.4927102  | -1.8667044 | -3.5224627 |    |            |            |            |
| H  | 6.2679414  | -3.1211298 | -2.2567419 |    |            |            |            |
| C  | 3.5221703  | -2.8809143 | -1.9852469 |    |            |            |            |
| C  | 0.4573943  | -3.9257744 | 1.7557044  |    |            |            |            |
| C  | 2.2992205  | -3.7254356 | -0.0201243 |    |            |            |            |
| H  | 3.9013506  | -4.4917279 | 2.1095483  |    |            |            |            |
| H  | 2.6184222  | -5.7240432 | 1.9233321  |    |            |            |            |
| C  | 4.4827974  | -1.8939912 | -2.6441711 |    |            |            |            |
| C  | 3.1850386  | -2.7782666 | -0.6139265 |    |            |            |            |
| C  | 1.9461982  | -3.6850325 | 1.4676462  |    |            |            |            |
| H  | 2.9233540  | -0.5758440 | -3.4448847 |    |            |            |            |
| H  | -0.1829942 | -3.2067087 | 1.2151093  |    |            |            |            |
| H  | 3.5120390  | -1.7913757 | -4.6202340 |    |            |            |            |
| H  | -0.4819777 | -5.9071532 | -2.0054430 |    |            |            |            |
| H  | 0.1370948  | -4.9546465 | 1.4873126  |    |            |            |            |
| H  | 1.7792285  | -5.2704040 | -5.0405721 |    |            |            |            |
| H  | 4.7752611  | -1.1521165 | -1.8722021 |    |            |            |            |
| H  | 2.1834240  | -2.6661278 | 1.8373383  |    |            |            |            |
| H  | 3.2487672  | -4.0008220 | -3.8106631 |    |            |            |            |
| Zn | -0.7961732 | 0.1732980  | -3.4465310 |    |            |            |            |
| Br | -1.3513310 | 1.5074926  | -5.2460155 |    |            |            |            |
| C  | -6.1583273 | 2.1487073  | -3.5151475 |    |            |            |            |
| C  | -3.2301021 | -0.3193725 | -1.5953541 |    |            |            |            |
| C  | -5.4180866 | 1.2220529  | -4.2738216 |    |            |            |            |
| C  | -4.9942096 | 1.4415644  | -1.5044762 |    |            |            |            |
| C  | -4.2553902 | 0.5024498  | -2.2589396 |    |            |            |            |
| C  | -5.9428021 | 2.2602046  | -2.1305759 |    |            |            |            |
| C  | -4.4717329 | 0.4005328  | -3.6527451 |    |            |            |            |
| O  | -2.2728471 | -0.8354662 | -2.3069548 |    |            |            |            |
| H  | -6.8996045 | 2.7950511  | -4.0096259 |    |            |            |            |
| H  | -4.7796225 | 1.5598143  | -0.4324136 |    |            |            |            |
| H  | -5.5739433 | 1.1497396  | -5.3605893 |    |            |            |            |
| H  | -6.5053974 | 2.9991403  | -1.5395787 |    |            |            |            |
| H  | -3.8757950 | -0.3133921 | -4.2396483 |    |            |            |            |
| Br | 0.1419658  | -2.1230926 | -3.8381952 |    |            |            |            |

$TS_{fav.} = TS_{\gamma\text{-ma}}$

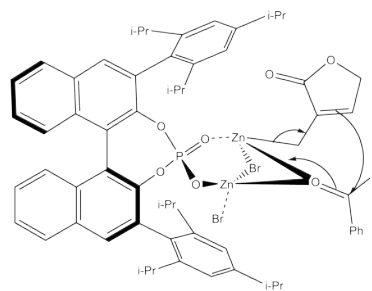

Energy (Hartree) = -11970.02641285  
number of imaginary frequencies: 1

|   |            |            |            |
|---|------------|------------|------------|
| C | 1.2627635  | 1.9578165  | 0.9564340  |
| C | 2.6632001  | 1.9641860  | 0.9660505  |
| C | 3.3222412  | 3.2468265  | 0.9736295  |
| C | 4.7286430  | 3.3872393  | 0.7786685  |
| C | 2.5311412  | 4.4407750  | 1.1539713  |
| C | 3.1844029  | 5.7094011  | 1.1776707  |
| C | 1.1190427  | 4.3325029  | 1.3058369  |
| H | 0.5327562  | 5.2424223  | 1.5063528  |
| C | 0.4588407  | 3.1144825  | 1.1831273  |
| C | 3.7143041  | -1.6646657 | 0.2341737  |
| C | 4.7105457  | -1.8550213 | 1.1828068  |
| H | 5.2176721  | -2.8301755 | 1.2392239  |
| C | 5.0469493  | -0.8491662 | 2.1326456  |
| C | 6.0152749  | -1.0980505 | 3.1508538  |
| C | 4.3463664  | 0.4135166  | 2.1141008  |
| C | 4.5951621  | 1.3313249  | 3.1794267  |
| C | 3.4053503  | 0.6738981  | 1.0470345  |
| C | 3.1250469  | -0.3657347 | 0.1551768  |
| O | 0.5783293  | 0.7565526  | 0.8067468  |
| O | 2.2511027  | -0.1291992 | -0.9021923 |
| P | 0.6387044  | -0.0199021 | -0.6334469 |
| O | 0.0867310  | 0.8186872  | -1.7956872 |
| O | -0.0141898 | -1.3801670 | -0.3313379 |
| C | 4.5560259  | 5.8095982  | 1.0019563  |
| C | 5.3299895  | 4.6378678  | 0.7887039  |
| H | 2.5715198  | 6.6125988  | 1.3250070  |
| H | 5.0450065  | 6.7955280  | 1.0142589  |
| H | 5.3341315  | 2.4862756  | 0.6057526  |
| H | 6.4149968  | 4.7219928  | 0.6239730  |
| C | 5.5289028  | 1.0500482  | 4.1671576  |
| C | 6.2623103  | -0.1651330 | 4.1456125  |
| H | 4.0309117  | 2.2722998  | 3.2215151  |
| H | 5.6960309  | 1.7755352  | 4.9779063  |
| H | 7.0072991  | -0.3726304 | 4.9287335  |
| H | 6.5494384  | -2.0611686 | 3.1406558  |
| C | -1.8917395 | 3.6300668  | 0.3995355  |
| C | -1.0255897 | 2.9958259  | 1.3345205  |

|   |            |            |            |    |            |            |            |
|---|------------|------------|------------|----|------------|------------|------------|
| C | -3.2788406 | 3.6038043  | 0.6354634  | H  | 4.7666474  | -1.1457500 | -1.8692301 |
| C | -1.5758190 | 2.2777688  | 2.4356171  | H  | 2.1918477  | -2.6819679 | 1.8438376  |
| C | -2.9724995 | 2.2598070  | 2.6047440  | H  | 3.2456370  | -3.9931692 | -3.8117302 |
| C | -3.8443147 | 2.9344255  | 1.7347735  | Zn | -0.7968883 | 0.1787844  | -3.4611894 |
| H | -3.9484249 | 4.1086072  | -0.0804592 | Br | -1.3926031 | 1.4983791  | -5.2487464 |
| C | -0.7218003 | 1.5380788  | 3.4655783  | C  | -6.1554397 | 2.1591176  | -3.5054654 |
| H | -3.3866619 | 1.7050793  | 3.4598173  | C  | -3.2324417 | -0.3244513 | -1.5922923 |
| C | -1.0299808 | 0.0281991  | 3.4778826  | C  | -5.4102412 | 1.2405336  | -4.2674474 |
| H | -2.0756000 | -0.1806088 | 3.7853341  | C  | -4.9978604 | 1.4388928  | -1.4956146 |
| H | -0.3637259 | -0.4980797 | 4.1923677  | C  | -4.2568693 | 0.5046853  | -2.2534205 |
| H | -0.8776190 | -0.4228373 | 2.4790857  | C  | -5.9453075 | 2.2602800  | -2.1196242 |
| C | -0.8705397 | 2.1617867  | 4.8661301  | C  | -4.4664385 | 0.4144559  | -3.6484633 |
| H | 0.3428411  | 1.6548190  | 3.1813213  | O  | -2.2777541 | -0.8374556 | -2.3098388 |
| H | -1.9072592 | 2.0629000  | 5.2502349  | H  | -6.8942085 | 2.8095322  | -3.9983765 |
| H | -0.6177527 | 3.2415138  | 4.8557700  | H  | -4.7840823 | 1.5530141  | -0.4229157 |
| H | -0.1980833 | 1.6575915  | 5.5905537  | H  | -5.5552955 | 1.1802258  | -5.3563336 |
| C | -5.3491169 | 2.9846139  | 1.9778858  | H  | -6.5094324 | 2.9951110  | -1.5248673 |
| C | -5.9132611 | 1.7058862  | 2.6156819  | H  | -3.8612379 | -0.2881568 | -4.2393101 |
| H | -7.0219270 | 1.7228183  | 2.6132308  | Br | 0.1323295  | -2.1320093 | -3.8430601 |
| H | -5.5943341 | 1.6038747  | 3.6735797  | Zn | -1.0235472 | -2.3824990 | -1.6840828 |
| H | -5.5741077 | 0.7915189  | 2.0878970  | H  | -5.5836632 | -0.4857944 | 0.0334414  |
| C | -5.7153163 | 4.2275447  | 2.8133766  | H  | -2.7676317 | -4.1905060 | -2.0373311 |
| H | -5.8323458 | 3.1099297  | 0.9817099  | C  | -4.4429267 | -2.0500294 | -1.0409076 |
| H | -6.8136202 | 4.3081340  | 2.9522641  | C  | -5.3018636 | -1.5568919 | 0.0945749  |
| H | -5.3574331 | 5.1581261  | 2.3292647  | H  | -4.8519719 | -2.1954262 | -2.0507838 |
| H | -5.2457969 | 4.1711779  | 3.8175598  | C  | -3.4448521 | -2.8616111 | -0.4800962 |
| C | -1.3747134 | 4.2871444  | -0.8794036 | C  | -2.4870873 | -3.7216296 | -1.0777757 |
| C | -1.9999965 | 3.6442505  | -2.1291707 | C  | -3.4340501 | -2.5571908 | 1.0015613  |
| H | -1.5359138 | 4.0384831  | -3.0550936 | O  | -4.5167683 | -1.7574161 | 1.2796150  |
| H | -3.0924717 | 3.8271428  | -2.1976291 | O  | -2.6522162 | -2.9253857 | 1.8465491  |
| H | -1.8427776 | 2.5490482  | -2.1315408 | H  | -6.2440013 | -2.1442850 | 0.1814362  |
| C | -1.5840294 | 5.8115105  | -0.8699286 | H  | -1.9430880 | -4.3744570 | -0.3704616 |
| H | -0.2840620 | 4.0965686  | -0.9350303 | H  | -3.0167217 | -0.0740242 | -0.5275846 |
| H | -1.1709824 | 6.2697753  | -1.7919758 |    |            |            |            |
| H | -1.0898641 | 6.2887204  | 0.0007512  |    |            |            |            |
| H | -2.6628163 | 6.0699411  | -0.8219643 |    |            |            |            |
| H | 1.7638796  | -6.9645291 | -2.4597856 |    |            |            |            |
| H | 5.5615822  | -3.3422756 | -3.8891590 |    |            |            |            |
| H | 2.6099462  | -4.6455839 | 3.3389510  |    |            |            |            |
| C | 1.4954423  | -6.0288790 | -3.0033926 |    |            |            |            |
| H | 4.5181040  | -0.3642631 | -4.2144447 |    |            |            |            |
| H | -0.4796728 | -6.8257501 | -3.5460567 |    |            |            |            |
| H | 0.2532073  | -3.8160774 | 2.8387399  |    |            |            |            |
| C | 2.1037226  | -4.8814022 | -2.1957370 |    |            |            |            |
| C | 5.7676803  | -2.5873818 | -3.1016577 |    |            |            |            |
| C | -0.0448466 | -5.9480129 | -3.0250649 |    |            |            |            |
| H | -0.3795752 | -5.0335512 | -3.5577641 |    |            |            |            |
| C | 2.9767337  | -3.9309917 | -2.7478139 |    |            |            |            |
| C | 2.8254382  | -4.7011338 | 2.2518632  |    |            |            |            |
| H | 3.1464504  | -6.2553448 | -4.4432492 |    |            |            |            |
| C | 1.7862015  | -4.7580966 | -0.8279518 |    |            |            |            |
| C | 2.0430174  | -6.1512422 | -4.4297040 |    |            |            |            |
| H | 1.6140750  | -7.0403896 | -4.9340208 |    |            |            |            |
| H | 1.1195122  | -5.5052747 | -0.3682047 |    |            |            |            |
| C | 3.8122974  | -1.1087220 | -3.7916518 |    |            |            |            |
| H | 6.4847950  | -1.8527671 | -3.5229328 |    |            |            |            |
| H | 6.2645250  | -3.1097558 | -2.2590184 |    |            |            |            |
| C | 3.5195852  | -2.8785306 | -1.9839039 |    |            |            |            |
| C | 0.4640602  | -3.9381683 | 1.7572148  |    |            |            |            |
| C | 2.3052573  | -3.7337272 | -0.0182499 |    |            |            |            |
| H | 3.9073530  | -4.5110109 | 2.1075628  |    |            |            |            |
| H | 2.6237457  | -5.7405850 | 1.9175502  |    |            |            |            |
| C | 4.4755767  | -1.8868579 | -2.6424359 |    |            |            |            |
| C | 3.1854446  | -2.7813449 | -0.6115287 |    |            |            |            |
| C | 1.9531594  | -3.6988929 | 1.4698547  |    |            |            |            |
| H | 2.9119141  | -0.5706652 | -3.4382324 |    |            |            |            |
| H | -0.1748613 | -3.2149737 | 1.2205137  |    |            |            |            |
| H | 3.5015644  | -1.7819420 | -4.6173965 |    |            |            |            |
| H | -0.4718135 | -5.9208004 | -2.0026268 |    |            |            |            |
| H | 0.1410520  | -4.9651531 | 1.4845626  |    |            |            |            |
| H | 1.7764303  | -5.2637877 | -5.0411212 |    |            |            |            |

### TS $\lambda$ -ma

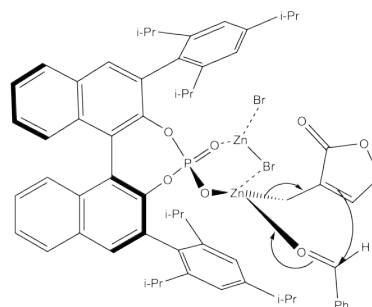

Energy (Hartree) = -11970.014802  
number of imaginary frequencies: 1

|   |           |            |            |
|---|-----------|------------|------------|
| C | 1.0744604 | 2.2896572  | 0.4538723  |
| C | 2.4740009 | 2.3024069  | 0.4522644  |
| C | 3.1292712 | 3.5900874  | 0.4719602  |
| C | 4.5362579 | 3.7422311  | 0.2862484  |
| C | 2.3321861 | 4.7810106  | 0.6460181  |
| C | 2.9791665 | 6.0518697  | 0.6959189  |
| C | 0.9145989 | 4.6739381  | 0.7408168  |
| H | 0.3230101 | 5.5855451  | 0.9143005  |
| C | 0.2616110 | 3.4560851  | 0.6059758  |
| C | 3.6479938 | -1.1598576 | -0.7566559 |
| C | 4.7289590 | -1.3945577 | 0.0825769  |
| H | 5.3262277 | -2.3101834 | -0.0478750 |
| C | 5.0534193 | -0.5065446 | 1.1509211  |
| C | 6.1079969 | -0.8108336 | 2.0629090  |
| C | 4.2750851 | 0.6942849  | 1.3522850  |
| C | 4.5492879 | 1.4909681  | 2.5038116  |
| C | 3.2396650 | 1.0238233  | 0.3999290  |
| C | 2.9471474 | 0.0762991  | -0.5827767 |
| O | 0.3989631 | 1.0671167  | 0.3482954  |



|   |            |            |            |    |            |            |            |
|---|------------|------------|------------|----|------------|------------|------------|
| O | 1.9570614  | 0.3554524  | -1.5167770 | H  | 0.8686111  | -4.7564881 | -1.7510708 |
| P | 0.3735498  | 0.3831811  | -1.1422466 | C  | 3.0499499  | 0.3274366  | -4.5838610 |
| O | -0.2380678 | 1.3236529  | -2.1943947 | H  | 5.7077439  | -0.4348909 | -4.8472642 |
| O | -0.2511465 | -1.0103198 | -0.9936952 | H  | 5.6562178  | -1.8952155 | -3.8008619 |
| C | 4.3525665  | 6.1607431  | 0.5421611  | C  | 2.9931403  | -1.7727337 | -3.1169266 |
| C | 5.1320530  | 4.9952329  | 0.3190878  | C  | 1.2828546  | -2.9941789 | 1.0390769  |
| H | 2.3592989  | 6.9503951  | 0.8425826  | C  | 2.3455367  | -3.2506306 | -1.2485223 |
| H | 4.8373498  | 7.1482655  | 0.5748584  | H  | 3.1301136  | -5.7044695 | -0.2143684 |
| H | 5.1506869  | 2.8504251  | 0.1023145  | H  | 1.3731218  | -5.6356482 | 0.1429439  |
| H | 6.2180748  | 5.0849331  | 0.1643838  | C  | 3.8451989  | -0.6467877 | -3.6991074 |
| C | 5.5695039  | 1.1543500  | 3.3831676  | C  | 3.0619398  | -2.1219947 | -1.7385068 |
| C | 6.3689127  | 0.0037774  | 3.1543918  | C  | 2.3961103  | -3.6781095 | 0.2215973  |
| H | 3.9340263  | 2.3806415  | 2.6965639  | H  | 2.1731102  | 0.7390951  | -4.0483604 |
| H | 5.7557594  | 1.7833956  | 4.2669613  | H  | 1.3828056  | -1.8911732 | 1.0344045  |
| H | 7.1816872  | -0.2487143 | 3.8522454  | H  | 2.6785602  | -0.1554357 | -5.5108942 |
| H | 6.7020938  | -1.7220820 | 1.8907032  | H  | -1.2620925 | -2.7193411 | -3.5789474 |
| C | -2.0501181 | 3.5841268  | -0.4498130 | H  | 0.2921335  | -3.2326191 | 0.6047435  |
| C | -1.2268036 | 3.2987502  | 0.6762551  | H  | 1.1583137  | -3.9002757 | -6.3083516 |
| C | -3.4279442 | 3.3242869  | -0.3538446 | H  | 4.2562500  | -0.0627422 | -2.8489564 |
| C | -1.8017464 | 2.7816368  | 1.8660038  | H  | 3.3591329  | -3.3260207 | 0.6413081  |
| C | -3.1844057 | 2.5200145  | 1.9009904  | H  | 2.0473333  | -2.1939040 | -5.0140679 |
| C | -4.0155917 | 2.7712000  | 0.7991367  | Zn | -1.3163193 | 0.8775853  | -3.7352240 |
| H | -4.0772425 | 3.5360191  | -1.2182222 | Br | -0.7828848 | 1.0702917  | -5.9449483 |
| C | -0.9599601 | 2.5030680  | 3.1097665  | C  | -4.1959463 | -1.2593132 | 5.7289071  |
| H | -3.6137169 | 2.0914316  | 2.8187117  | C  | -2.4815483 | -1.9881578 | 1.8397304  |
| C | -0.9835308 | 1.0151264  | 3.4949797  | C  | -4.8988998 | -0.8862683 | 4.5679943  |
| H | -1.9959245 | 0.6971050  | 3.8143980  | C  | -2.3943588 | -2.1324062 | 4.3487832  |
| H | -0.2910324 | 0.8145037  | 4.3386278  | C  | -3.0970357 | -1.7660235 | 3.1821367  |
| H | -0.6836727 | 0.3806665  | 2.6379120  | C  | -2.9424923 | -1.8812641 | 5.6163382  |
| C | -1.3919523 | 3.3975924  | 4.2858387  | C  | -4.3534203 | -1.1365398 | 3.3031087  |
| H | 0.0902845  | 2.7683280  | 2.8723464  | O  | -2.8047019 | -1.1819184 | 0.8781502  |
| H | -2.4353192 | 3.1810601  | 4.5971472  | H  | -4.6241192 | -1.0565439 | 6.7224007  |
| H | -1.3382504 | 4.4719541  | 4.0167632  | H  | -1.3893404 | -2.5762326 | 4.2612511  |
| H | -0.7390116 | 3.2297270  | 5.1673773  | H  | -5.8774170 | -0.3885521 | 4.6526246  |
| C | -5.4933631 | 2.3946747  | 0.7805471  | H  | -2.3800280 | -2.1589556 | 6.5206837  |
| C | -5.6771963 | 1.0567218  | 0.0333317  | H  | -4.8826708 | -0.8284130 | 2.3895791  |
| H | -6.7447531 | 0.7531864  | 0.0102416  | Br | -3.2619414 | -0.2997817 | -2.8215040 |
| H | -5.0864514 | 0.2523654  | 0.5194839  | Zn | -2.1512030 | -1.5299635 | -0.9371945 |
| H | -5.3148065 | 1.1249541  | -1.0114574 | H  | -2.3314421 | -4.4858228 | 3.2475422  |
| C | -6.1472125 | 2.3523121  | 2.1678581  | H  | -4.1023801 | -3.0334189 | -1.3000984 |
| H | -6.0168892 | 3.1794977  | 0.1888823  | C  | -3.3239894 | -3.8036275 | 1.3883882  |
| H | -7.2384838 | 2.1778724  | 2.0772715  | C  | -2.7414159 | -4.8692500 | 2.2904271  |
| H | -5.9952878 | 3.3006571  | 2.7217175  | H  | -4.3548727 | -3.4543405 | 1.5451194  |
| H | -5.7354219 | 1.5314205  | 2.7906712  | C  | -2.8127816 | -4.0553532 | 0.0926095  |
| C | -1.4675809 | 4.1548914  | -1.7426295 | C  | -3.0904436 | -3.4445721 | -1.1422809 |
| C | -2.1869010 | 3.6518554  | -3.0069902 | C  | -1.7108555 | -5.0685011 | 0.2415091  |
| H | -1.5488697 | 3.7671918  | -3.9063692 | O  | -1.6659521 | -5.4691537 | 1.5470166  |
| H | -3.1325745 | 4.1971189  | -3.2074564 | O  | -0.9782064 | -5.5184199 | -0.6141568 |
| H | -2.4888847 | 2.5858931  | -2.8952579 | H  | -3.4849364 | -5.6593498 | 2.5371538  |
| C | -1.4612166 | 5.6959003  | -1.7325214 | H  | -2.6123949 | -3.8994160 | -2.0278480 |
| H | -0.4167783 | 3.8061756  | -1.8026104 | H  | -1.4294220 | -2.3627543 | 1.8883623  |
| H | -1.0267940 | 6.0949020  | -2.6725384 |    |            |            |            |
| H | -0.8685727 | 6.0982293  | -0.8890052 |    |            |            |            |
| H | -2.4939770 | 6.0913486  | -1.6362514 |    |            |            |            |
| H | -0.1992942 | -4.9980388 | -3.7487392 |    |            |            |            |
| H | 4.7114359  | -1.8500206 | -5.3204060 |    |            |            |            |
| H | 2.5556515  | -5.4619545 | 1.4682422  |    |            |            |            |
| C | 0.2283611  | -4.1517735 | -4.3297751 |    |            |            |            |
| H | 3.6905032  | 1.1777891  | -4.8955044 |    |            |            |            |
| H | -1.7627964 | -3.5661227 | -5.0792361 |    |            |            |            |
| H | 1.2965473  | -3.3414621 | 2.0933892  |    |            |            |            |
| C | 1.3222424  | -3.5347679 | -3.4692702 |    |            |            |            |
| C | 5.0495211  | -1.2391212 | -4.4573113 |    |            |            |            |
| C | -0.8972693 | -3.1201481 | -4.5464905 |    |            |            |            |
| H | -0.5464697 | -2.2516828 | -5.1435557 |    |            |            |            |
| C | 2.1282956  | -2.4910383 | -3.9568578 |    |            |            |            |
| C | 2.3595473  | -5.2047229 | 0.4068993  |    |            |            |            |
| H | 1.5465544  | -5.4559027 | -5.5085502 |    |            |            |            |
| C | 1.4844486  | -3.9293226 | -2.1319291 |    |            |            |            |
| C | 0.7454159  | -4.7061598 | -5.6664359 |    |            |            |            |
| H | -0.0738937 | -5.1916093 | -6.2357454 |    |            |            |            |

### TS $\nu$ -ma; COSMO

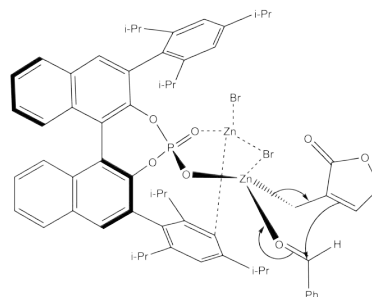

Energy (Hartree) = -11970.03284193

|   |           |           |           |
|---|-----------|-----------|-----------|
| C | 0.7810616 | 2.6507056 | 1.3595582 |
| C | 2.1787239 | 2.6588361 | 1.3892155 |
| C | 2.8507511 | 3.9375472 | 1.4313797 |
| C | 4.2656654 | 4.0784105 | 1.2987613 |
| C | 2.0618925 | 5.1373392 | 1.5827984 |

|   |            |            |            |    |            |            |            |
|---|------------|------------|------------|----|------------|------------|------------|
| C | 2.7182806  | 6.4011861  | 1.6803603  | C  | 2.2497843  | -3.8851171 | -4.8076250 |
| C | 0.6407356  | 5.0509788  | 1.5592436  | H  | 3.2827857  | 2.3932605  | -3.6880713 |
| H | 0.0513933  | 5.9772702  | 1.6361784  | H  | 0.8604283  | -3.8686448 | -6.5042786 |
| C | -0.0123805 | 3.8386423  | 1.3811228  | H  | 0.7207532  | -4.3228876 | 1.3440674  |
| C | 3.4647946  | -0.6356224 | -0.0852884 | C  | 2.5915315  | -3.0477193 | -3.5824415 |
| C | 4.5437333  | -0.9012778 | 0.7506609  | C  | 5.2853214  | 0.4515404  | -3.4931354 |
| H | 5.2076354  | -1.7464237 | 0.5144734  | C  | 1.1424591  | -3.2227898 | -5.6465673 |
| C | 4.8018906  | -0.1302391 | 1.9200641  | H  | 1.4741706  | -2.2465168 | -6.0588750 |
| C | 5.8531932  | -0.4792026 | 2.8205816  | C  | 3.0805320  | -1.7356710 | -3.7074071 |
| C | 3.9793893  | 1.0193471  | 2.2098631  | C  | 3.4799458  | -4.3637384 | 0.6819452  |
| C | 4.2156324  | 1.7340495  | 3.4226211  | H  | 4.2802070  | -4.6987748 | -5.0541666 |
| C | 2.9341193  | 1.3808205  | 1.2837671  | C  | 2.3980216  | -3.5541384 | -2.2876595 |
| C | 2.6596209  | 0.5011525  | 0.2293616  | C  | 3.4981612  | -4.1904903 | -5.6543119 |
| O | 0.1078319  | 1.4318694  | 1.3534264  | H  | 3.2431381  | -4.8454812 | -6.5133746 |
| O | 1.5808359  | 0.7670799  | -0.6196031 | H  | 1.9886353  | -4.5697514 | -2.1833430 |
| P | 0.0787573  | 0.5132386  | -0.0167060 | C  | 2.9046297  | 1.3535597  | -3.5985860 |
| O | -0.8985802 | 1.0695923  | -1.0621509 | H  | 5.6903291  | 1.4788081  | -3.6056904 |
| O | -0.1175164 | -0.9370395 | 0.4540110  | H  | 6.0109727  | -0.1418566 | -2.9003334 |
| C | 4.0984518  | 6.4961444  | 1.5881706  | C  | 3.3665454  | -0.9327553 | -2.5897056 |
| C | 4.8728286  | 5.3244301  | 1.3759014  | C  | 0.9985031  | -4.0946482 | 0.2951543  |
| H | 2.1016504  | 7.3045526  | 1.8097341  | C  | 2.6578017  | -2.7920602 | -1.1341826 |
| H | 4.5929178  | 7.4769580  | 1.6574976  | H  | 4.4689154  | -3.8659536 | 0.7229994  |
| H | 4.8806639  | 3.1854485  | 1.1245322  | H  | 3.5642783  | -5.2133340 | -0.0279223 |
| H | 5.9650598  | 5.4038585  | 1.2651800  | C  | 3.9027994  | 0.4805916  | -2.8154470 |
| C | 5.2342122  | 1.3572099  | 4.2874537  | C  | 3.1594524  | -1.4702605 | -1.2883464 |
| C | 6.0706159  | 0.2504100  | 3.9799697  | C  | 2.3672436  | -3.3949226 | 0.2397389  |
| H | 3.5697143  | 2.5866707  | 3.6755041  | H  | 1.9220298  | 1.3855682  | -3.0884163 |
| H | 5.3907241  | 1.9175512  | 5.2218473  | H  | 0.2123124  | -3.4466207 | -0.1365181 |
| H | 6.8798645  | -0.0340291 | 4.6696355  | H  | 2.7463842  | 0.9671343  | -4.6271237 |
| H | 6.4808397  | -1.3520764 | 2.5817766  | H  | 0.2400037  | -3.0521730 | -5.0281087 |
| C | -1.9537491 | 3.8735404  | -0.2156620 | H  | 0.9911044  | -5.0479908 | -0.2722956 |
| C | -1.4842518 | 3.7405101  | 1.1254431  | H  | 3.9433011  | -3.2597502 | -6.0655109 |
| C | -3.3336051 | 3.6602346  | -0.4669208 | H  | 4.0445395  | 0.9555028  | -1.8231919 |
| C | -2.3932572 | 3.4773212  | 2.1797286  | H  | 2.3296836  | -2.5578687 | 0.9664992  |
| C | -3.7664187 | 3.3274293  | 1.8886228  | H  | 3.2376958  | -1.3153541 | -4.7140004 |
| C | -4.2613679 | 3.3961740  | 0.5802049  | Zn | -2.8724890 | 1.3610701  | -0.8569975 |
| H | -3.7245570 | 3.8174095  | -1.4849767 | Br | -4.1896572 | 0.9659238  | -2.7528823 |
| C | -1.9085176 | 3.3269396  | 3.6171001  | C  | -5.3344743 | -6.8874672 | 3.3508420  |
| H | -4.4604602 | 3.1168699  | 2.7146178  | C  | -2.4411876 | -4.6279185 | 1.0905388  |
| C | -2.0396325 | 1.8705210  | 4.1007387  | C  | -5.5131473 | -5.5048111 | 3.1514580  |
| H | -3.1011811 | 1.5476245  | 4.1260724  | C  | -3.2600049 | -6.7985698 | 2.0836440  |
| H | -1.6275663 | 1.7676825  | 5.1256297  | C  | -3.4422588 | -5.4162653 | 1.8675366  |
| H | -1.4951529 | 1.1776659  | 3.4305004  | C  | -4.2039826 | -7.5309220 | 2.8215360  |
| C | -2.6189363 | 4.3091783  | 4.5647797  | C  | -4.5721765 | -4.7720762 | 2.4187835  |
| H | -0.8286729 | 3.5825703  | 3.6261040  | O  | -2.3148310 | -3.3764260 | 1.3769119  |
| H | -3.7050409 | 4.0938917  | 4.6424559  | H  | -6.0750624 | -7.4612801 | 3.9289452  |
| H | -2.5053306 | 5.3581310  | 4.2230905  | H  | -2.3575652 | -7.2980523 | 1.6953768  |
| H | -2.1941979 | 4.2326809  | 5.5864806  | H  | -6.3930232 | -4.9973214 | 3.5762445  |
| C | -5.7347793 | 3.2426930  | 0.2308147  | H  | -4.0504378 | -8.6075920 | 2.9916627  |
| C | -6.5351914 | 2.4184044  | 1.2457382  | H  | -4.6887807 | -3.6884268 | 2.2625713  |
| H | -7.5646532 | 2.2502590  | 0.8712317  | Br | -3.4160396 | -0.0585256 | 1.1019684  |
| H | -6.6245950 | 2.9376983  | 2.2229169  | Zn | -1.8458615 | -1.8684161 | 0.2679282  |
| H | -6.0681717 | 1.4285501  | 1.4211952  | H  | -2.8321615 | -6.9223078 | -0.5195388 |
| C | -6.3696700 | 4.6310061  | 0.0104187  | H  | -3.5651225 | -1.9618149 | -1.5057006 |
| H | -5.7622518 | 2.7016960  | -0.7425743 | C  | -3.3341567 | -4.7837432 | -0.8144732 |
| H | -7.4236933 | 4.5294756  | -0.3195997 | C  | -2.9828404 | -6.1635870 | -1.3145230 |
| H | -5.8252560 | 5.2128348  | -0.7603779 | H  | -4.3551307 | -4.5525930 | -0.4782206 |
| H | -6.3592052 | 5.2211144  | 0.9508076  | C  | -2.5592325 | -3.8718844 | -1.5618238 |
| C | -1.0347191 | 4.3420898  | -1.3434587 | C  | -2.5896271 | -2.4659926 | -1.6280576 |
| C | -1.3701072 | 3.7887989  | -2.7362192 | C  | -1.4918253 | -4.6782433 | -2.2505107 |
| H | -0.6110827 | 4.1413462  | -3.4631294 | O  | -1.7428501 | -6.0063715 | -2.0306333 |
| H | -2.3563592 | 4.1386366  | -3.1043684 | O  | -0.5614022 | -4.2910641 | -2.9254271 |
| H | -1.3635957 | 2.6828600  | -2.7616198 | H  | -3.7502204 | -6.5593776 | -2.0160385 |
| C | -1.0398301 | 5.8861627  | -1.3816851 | H  | -1.9053359 | -1.9974942 | -2.3584942 |
| H | -0.0068752 | 4.0085386  | -1.0904308 | H  | -1.5345826 | -5.2016777 | 0.7788599  |
| H | -0.3310749 | 6.2534887  | -2.1514814 |    |            |            |            |
| H | -0.7499321 | 6.3312420  | -0.4111023 |    |            |            |            |
| H | -2.0512552 | 6.2644735  | -1.6385790 |    |            |            |            |
| H | 1.8424529  | -4.8479198 | -4.4317995 |    |            |            |            |
| H | 5.2309129  | -0.0001783 | -4.5058014 |    |            |            |            |
| H | 3.2657560  | -4.7803988 | 1.6882906  |    |            |            |            |

TS $\nu$ -ma

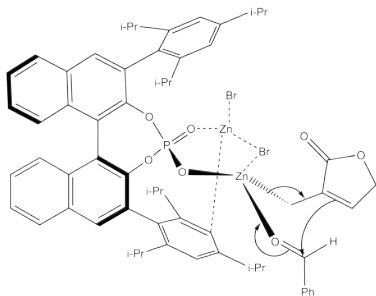

Energy (Hartree) = -11970.02052941  
 number of imaginary frequencies: 1

|   |            |            |            |
|---|------------|------------|------------|
| C | 0.7836031  | 2.6511675  | 1.3633002  |
| C | 2.1815728  | 2.6609867  | 1.3915043  |
| C | 2.8527597  | 3.9401745  | 1.4295330  |
| C | 4.2674618  | 4.0811048  | 1.2966479  |
| C | 2.0639464  | 5.1402199  | 1.5776742  |
| C | 2.7205471  | 6.4037115  | 1.6714698  |
| C | 0.6431121  | 5.0524114  | 1.5546407  |
| H | 0.0525178  | 5.9783176  | 1.6281539  |
| C | -0.0099480 | 3.8395808  | 1.3809714  |
| C | 3.4660519  | -0.6334282 | -0.0825111 |
| C | 4.5464415  | -0.8973610 | 0.7517919  |
| H | 5.2094004  | -1.7426794 | 0.5136196  |
| C | 4.8072508  | -0.1258451 | 1.9200035  |
| C | 5.8605866  | -0.4724505 | 2.8183092  |
| C | 3.9850642  | 1.0235069  | 2.2106493  |
| C | 4.2246842  | 1.7398377  | 3.4214494  |
| C | 2.9374430  | 1.3832986  | 1.2869497  |
| C | 2.6609545  | 0.5031540  | 0.2333845  |
| O | 0.1110052  | 1.4340014  | 1.3617540  |
| O | 1.5803942  | 0.7677806  | -0.6121517 |
| P | 0.0791266  | 0.5108566  | -0.0067825 |
| O | -0.9012551 | 1.0661760  | -1.0488902 |
| O | -0.1126733 | -0.9389652 | 0.4656531  |
| C | 4.1001730  | 6.4988737  | 1.5791637  |
| C | 4.8742583  | 5.3270216  | 1.3704284  |
| H | 2.1038493  | 7.3074768  | 1.7980615  |
| H | 4.5942736  | 7.4800160  | 1.6456527  |
| H | 4.8816283  | 3.1871057  | 1.1254486  |
| H | 5.9664741  | 5.4060401  | 1.2597649  |
| C | 5.2457248  | 1.3650557  | 4.2836134  |
| C | 6.0812945  | 0.2585241  | 3.9756212  |
| H | 3.5788615  | 2.5925895  | 3.6737951  |
| H | 5.4047205  | 1.9271003  | 5.2165104  |
| H | 6.8925636  | -0.0248365 | 4.6632754  |
| H | 6.4874995  | -1.3457455 | 2.5791522  |
| C | -1.9532622 | 3.8659930  | -0.2143221 |
| C | -1.4820270 | 3.7402290  | 1.1268442  |
| C | -3.3325605 | 3.6499681  | -0.4626131 |
| C | -2.3893366 | 3.4804178  | 2.1832080  |
| C | -3.7621110 | 3.3264021  | 1.8939026  |
| C | -4.2586380 | 3.3885552  | 0.5858637  |
| H | -3.7244864 | 3.7969048  | -1.4817006 |
| C | -1.9020969 | 3.3354270  | 3.6204972  |
| H | -4.4547451 | 3.1162146  | 2.7211549  |
| C | -2.0279949 | 1.8803380  | 4.1091856  |
| H | -3.0881950 | 1.5535869  | 4.1376182  |
| H | -1.6138188 | 1.7812859  | 5.1336024  |
| H | -1.4830935 | 1.1866894  | 3.4403924  |
| C | -2.6123837 | 4.3195570  | 4.5661894  |
| H | -0.8228388 | 3.5939225  | 3.6262176  |
| H | -3.6979577 | 4.1029524  | 4.6470741  |
| H | -2.5024047 | 5.3676396  | 4.2209226  |
| H | -2.1865040 | 4.2480486  | 5.5877642  |
| C | -5.7310909 | 3.2252739  | 0.2366676  |

|    |            |            |            |
|----|------------|------------|------------|
| C  | -6.5269801 | 2.4011809  | 1.2551386  |
| H  | -7.5551065 | 2.2242293  | 0.8811287  |
| H  | -6.6214301 | 2.9244063  | 2.2299335  |
| H  | -6.0538860 | 1.4151459  | 1.4348165  |
| C  | -6.3746902 | 4.6079565  | 0.0077855  |
| H  | -5.7538528 | 2.6771782  | -0.7330467 |
| H  | -7.4277293 | 4.4988562  | -0.3228930 |
| H  | -5.8334858 | 5.1890899  | -0.7656759 |
| H  | -6.3690018 | 5.2045837  | 0.9440872  |
| C  | -1.0350956 | 4.3268734  | -1.3463474 |
| C  | -1.3710806 | 3.7644492  | -2.7354231 |
| H  | -0.6120632 | 4.1116977  | -3.4649055 |
| H  | -2.3570973 | 4.1114364  | -3.1067467 |
| H  | -1.3654750 | 2.6586099  | -2.7546330 |
| C  | -1.0385150 | 5.8705225  | -1.3945338 |
| H  | -0.0073583 | 3.9941135  | -1.0917538 |
| H  | -0.3301850 | 6.2331893  | -2.1669120 |
| H  | -0.7473188 | 6.3217450  | -0.4272059 |
| H  | -2.0495211 | 6.2488002  | -1.6530411 |
| H  | 1.8436600  | -4.8485545 | -4.4255547 |
| H  | 5.2248498  | 0.0039603  | -4.5041158 |
| H  | 3.2700286  | -4.7779463 | 1.6939055  |
| C  | 2.2494541  | -3.8853127 | -4.8017958 |
| H  | 3.2716894  | 2.3944419  | -3.6852797 |
| H  | 0.8594496  | -3.8727413 | -6.4975663 |
| H  | 0.7231072  | -4.3199832 | 1.3508685  |
| C  | 2.5907906  | -3.0471059 | -3.5771733 |
| C  | 5.2789608  | 0.4565165  | -3.4919457 |
| C  | 1.1403208  | -3.2258322 | -5.6404211 |
| H  | 1.4691648  | -2.2490204 | -6.0536148 |
| C  | 3.0777912  | -1.7348216 | -3.7025388 |
| C  | 3.4824880  | -4.3613544 | 0.6871442  |
| H  | 4.2818094  | -4.6942744 | -5.0484709 |
| C  | 2.3990436  | -3.5530899 | -2.2822184 |
| C  | 3.4982900  | -4.1884294 | -5.6484451 |
| H  | 3.2448703  | -4.8440121 | -6.5074577 |
| H  | 1.9905713  | -4.5690475 | -2.1781075 |
| C  | 2.8960504  | 1.3539034  | -3.5944776 |
| H  | 5.6825003  | 1.4842110  | -3.6059058 |
| H  | 6.0061109  | -0.1358229 | -2.9002751 |
| C  | 3.3641178  | -0.9312353 | -2.5860010 |
| C  | 1.0010432  | -4.0927743 | 0.3017239  |
| C  | 2.6591742  | -2.7906886 | -1.1294222 |
| H  | 4.4714206  | -3.8636699 | 0.7270488  |
| H  | 3.5673532  | -5.2107924 | -0.0226391 |
| C  | 3.8972145  | 0.4830828  | -2.8128693 |
| C  | 3.1594453  | -1.4686831 | -1.2845364 |
| C  | 2.3696137  | -3.3928215 | 0.2451966  |
| H  | 1.9137423  | 1.3832574  | -3.0838901 |
| H  | 0.2150057  | -3.4446224 | -0.1296399 |
| H  | 2.7364847  | 0.9671390  | -4.6225399 |
| H  | 0.2374531  | -3.0569183 | -5.0226045 |
| H  | 0.9930247  | -5.0459729 | -0.2660510 |
| H  | 3.9419906  | -3.2573318 | -6.0601654 |
| H  | 4.0396083  | 0.9586665  | -1.8209522 |
| H  | 2.3314356  | -2.5557118 | 0.9718639  |
| H  | 3.2325114  | -1.3145056 | -4.7094193 |
| Zn | -2.8784361 | 1.3429515  | -0.8475897 |
| Br | -4.2113774 | 0.9583833  | -2.7259246 |
| C  | -5.3588741 | -6.8847661 | 3.3229391  |
| C  | -2.4459173 | -4.6283644 | 1.0842097  |
| C  | -5.5263601 | -5.4999356 | 3.1330937  |
| C  | -3.2804948 | -6.8011074 | 2.0637368  |
| C  | -3.4520124 | -5.4166143 | 1.8557114  |
| C  | -4.2315881 | -7.5320772 | 2.7931235  |
| C  | -4.5782305 | -4.7686734 | 2.4090455  |
| O  | -2.3149284 | -3.3805594 | 1.3773224  |
| H  | -6.1053177 | -7.4573606 | 3.8945547  |
| H  | -2.3788847 | -7.3031740 | 1.6765512  |
| H  | -6.4034687 | -4.9891036 | 3.5595389  |
| H  | -4.0859647 | -8.6108237 | 2.9567970  |

|    |            |            |            |
|----|------------|------------|------------|
| H  | -4.6827537 | -3.6825344 | 2.2621015  |
| Br | -3.4042746 | -0.0603296 | 1.1291749  |
| Zn | -1.8419725 | -1.8661589 | 0.2788502  |
| H  | -2.8435255 | -6.9103420 | -0.5362525 |
| H  | -3.5590986 | -1.9405703 | -1.5003773 |
| C  | -3.3377027 | -4.7699748 | -0.8224286 |
| C  | -2.9850959 | -6.1475601 | -1.3296406 |
| H  | -4.3590717 | -4.5392072 | -0.4869824 |
| C  | -2.5584638 | -3.8553179 | -1.5626337 |
| C  | -2.5863247 | -2.4502284 | -1.6231152 |
| C  | -1.4864634 | -4.6605956 | -2.2484401 |
| O  | -1.7426732 | -5.9909752 | -2.0358547 |
| O  | -0.5504740 | -4.2705783 | -2.9107951 |
| H  | -3.7502147 | -6.5398014 | -2.0368934 |
| H  | -1.8974952 | -1.9797560 | -2.3480124 |
| H  | -1.5412672 | -5.2050920 | 0.7700337  |

### TS $\xi$ -ma; woelfling data

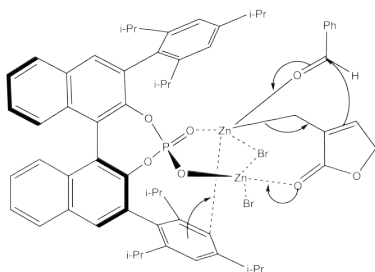

Energy (Hartree) = -11969.995995

|   |           |           |           |
|---|-----------|-----------|-----------|
| C | 1.020494  | 2.665182  | 1.224014  |
| C | 2.419335  | 2.716050  | 1.312811  |
| C | 3.033198  | 4.016610  | 1.365978  |
| C | 4.442174  | 4.197792  | 1.236525  |
| C | 2.192488  | 5.183721  | 1.489610  |
| C | 2.805628  | 6.471977  | 1.531834  |
| C | 0.774420  | 5.032622  | 1.538384  |
| H | 0.152835  | 5.928639  | 1.687613  |
| C | 0.156213  | 3.797423  | 1.369871  |
| C | 3.561129  | -0.825165 | 0.329000  |
| C | 4.494950  | -1.100336 | 1.321305  |
| H | 4.985352  | -2.085218 | 1.338223  |
| C | 4.801430  | -0.165077 | 2.352969  |
| C | 5.749290  | -0.483402 | 3.370377  |
| C | 4.103678  | 1.099739  | 2.414418  |
| C | 4.327774  | 1.942036  | 3.543858  |
| C | 3.207959  | 1.443850  | 1.339041  |
| C | 3.016704  | 0.497317  | 0.330744  |
| O | 0.414878  | 1.428984  | 0.986738  |
| O | 2.229004  | 0.874610  | -0.750475 |
| P | 0.617303  | 0.835436  | -0.530556 |
| O | 0.037143  | 1.814805  | -1.563263 |
| O | 0.136181  | -0.616572 | -0.512163 |
| C | 4.180645  | 6.613778  | 1.416389  |
| C | 5.002139  | 5.466699  | 1.253744  |
| H | 2.160623  | 7.358691  | 1.635048  |
| H | 4.637091  | 7.615071  | 1.433381  |
| H | 5.080098  | 3.313471  | 1.096860  |
| H | 6.089565  | 5.583886  | 1.130044  |
| C | 5.247384  | 1.594048  | 4.523451  |
| C | 5.980839  | 0.381934  | 4.428445  |
| H | 3.763876  | 2.880896  | 3.630841  |
| H | 5.407532  | 2.264344  | 5.381557  |
| H | 6.719336  | 0.124237  | 5.202523  |
| H | 6.288862  | -1.441001 | 3.300919  |
| C | -2.132508 | 3.936865  | 0.242149  |
| C | -1.339834 | 3.614554  | 1.380086  |

|   |           |           |           |
|---|-----------|-----------|-----------|
| C | -3.522461 | 3.705933  | 0.292937  |
| C | -1.969161 | 3.083777  | 2.541547  |
| C | -3.360968 | 2.871750  | 2.537330  |
| C | -4.164044 | 3.167979  | 1.421959  |
| H | -4.137070 | 3.937961  | -0.590509 |
| C | -1.177249 | 2.745889  | 3.803427  |
| H | -3.832619 | 2.448704  | 3.439202  |
| C | -1.198125 | 1.235140  | 4.098733  |
| H | -2.227013 | 0.881322  | 4.320383  |
| H | -0.565420 | 0.998153  | 4.979226  |
| H | -0.817885 | 0.658401  | 3.232050  |
| C | -1.662574 | 3.573385  | 5.007920  |
| H | -0.120204 | 3.030524  | 3.623710  |
| H | -2.712947 | 3.332290  | 5.273779  |
| H | -1.615750 | 4.660225  | 4.792377  |
| H | -1.037960 | 3.372820  | 5.902955  |
| C | -5.671776 | 2.917991  | 1.423093  |
| C | -6.025969 | 1.427901  | 1.570311  |
| H | -7.126469 | 1.288218  | 1.593437  |
| H | -5.610881 | 0.995869  | 2.504907  |
| H | -5.630971 | 0.845100  | 0.722168  |
| C | -6.398832 | 3.754313  | 2.490175  |
| H | -6.045884 | 3.241997  | 0.427307  |
| H | -7.494982 | 3.592176  | 2.423232  |
| H | -6.201578 | 4.838146  | 2.370221  |
| H | -6.084252 | 3.461871  | 3.513982  |
| C | -1.521632 | 4.548789  | -1.017210 |
| C | -2.161931 | 4.026012  | -2.316462 |
| H | -1.525078 | 4.269686  | -3.192519 |
| H | -3.155270 | 4.482408  | -2.509563 |
| H | -2.332645 | 2.928445  | -2.273246 |
| C | -1.596899 | 6.088697  | -0.969987 |
| H | -0.451951 | 4.257776  | -1.036701 |
| H | -1.139127 | 6.537741  | -1.875673 |
| H | -1.070058 | 6.498338  | -0.086182 |
| H | -2.652109 | 6.429631  | -0.913969 |
| H | 0.262472  | -4.997505 | -2.985180 |
| H | 5.299003  | -2.021200 | -4.002915 |
| H | 2.550879  | -4.242507 | 3.071922  |
| C | 1.300530  | -4.821853 | -3.349468 |
| H | 4.185026  | 0.960652  | -4.022279 |
| H | 0.649867  | -5.160892 | -5.406761 |
| H | 0.180859  | -3.388125 | 2.714549  |
| C | 1.904803  | -3.762083 | -2.430184 |
| C | 5.513883  | -1.345294 | -3.148769 |
| C | 1.205421  | -4.400242 | -4.820939 |
| H | 2.209801  | -4.306663 | -5.284598 |
| C | 2.736650  | -2.729891 | -2.889340 |
| C | 2.745777  | -4.148885 | 1.983402  |
| H | 2.075877  | -6.508462 | -2.158448 |
| C | 1.651616  | -3.822390 | -1.047946 |
| C | 2.055919  | -6.159433 | -3.210407 |
| H | 1.580172  | -6.951510 | -3.826084 |
| H | 0.985133  | -4.616143 | -0.673106 |
| C | 3.517622  | 0.150527  | -3.664360 |
| H | 6.218620  | -0.566605 | -3.506229 |
| H | 6.027337  | -1.945362 | -2.370131 |
| C | 3.304115  | -1.778661 | -2.017083 |
| C | 0.369613  | -3.366671 | 1.621519  |
| C | 2.189731  | -2.901860 | -0.133844 |
| H | 3.822785  | -3.929115 | 1.846426  |
| H | 2.550962  | -5.136630 | 1.514678  |
| C | 4.222467  | -0.708660 | -2.600563 |
| C | 3.038774  | -1.862208 | -0.625590 |
| C | 1.853585  | -3.062550 | 1.349948  |
| H | 2.606978  | 0.630122  | -3.257121 |
| H | -0.291144 | -2.604698 | 1.167569  |
| H | 3.218415  | -0.445976 | -4.550853 |
| H | 0.687262  | -3.426979 | -4.939149 |
| H | 0.066796  | -4.358579 | 1.224108  |
| H | 3.108531  | -6.051077 | -3.545929 |

|    |           |           |           |
|----|-----------|-----------|-----------|
| H  | 4.520564  | -0.033875 | -1.772035 |
| H  | 2.080132  | -2.099949 | 1.852476  |
| H  | 2.958996  | -2.650723 | -3.963804 |
| Zn | -0.480772 | 1.528535  | -3.407498 |
| Br | 0.377096  | 2.371869  | -5.342013 |
| H  | -4.952158 | -3.827898 | -1.318783 |
| Br | -2.073531 | -0.272564 | -3.288876 |
| H  | -3.403727 | 0.800005  | 0.378981  |
| Zn | -1.791709 | -0.826096 | -0.774606 |
| C  | -4.595487 | -2.445620 | 0.323663  |
| C  | -5.451272 | -2.985312 | -0.779973 |
| C  | -4.236577 | -1.164925 | 0.027216  |
| C  | -3.190487 | -0.273633 | 0.534582  |
| C  | -4.976261 | -0.786269 | -1.223149 |
| O  | -5.634669 | -1.903181 | -1.698648 |
| O  | -5.028187 | 0.288752  | -1.781562 |
| H  | -6.452488 | -3.354317 | -0.464447 |
| H  | -2.861810 | -0.463603 | 1.573796  |
| H  | -4.225656 | -3.052267 | 1.161566  |
| C  | -2.622091 | -7.164698 | -1.731487 |
| C  | -2.345545 | -5.836465 | -1.395384 |
| C  | -2.525013 | -4.826801 | -2.369598 |
| C  | -2.976038 | -5.154963 | -3.668144 |
| C  | -3.239546 | -6.486701 | -4.001553 |
| C  | -3.063894 | -7.488105 | -3.031292 |
| H  | -2.499304 | -7.961941 | -0.983265 |
| H  | -2.002017 | -5.551961 | -0.388891 |
| C  | -2.282894 | -3.415174 | -2.097766 |
| H  | -3.115096 | -4.347540 | -4.404905 |
| H  | -3.586999 | -6.743317 | -5.013094 |
| H  | -3.278554 | -8.536341 | -3.289166 |
| O  | -1.842594 | -2.951747 | -1.036749 |
| H  | -2.541842 | -2.723446 | -2.937536 |

|   |            |            |            |
|---|------------|------------|------------|
| O | 0.0501503  | -1.5525183 | -0.1247558 |
| C | 4.5947583  | 5.7075108  | 1.0989005  |
| C | 5.3483313  | 4.5257954  | 0.8643383  |
| H | 2.6195113  | 6.5380725  | 1.4152052  |
| H | 5.1013026  | 6.6840857  | 1.1329157  |
| H | 5.3214538  | 2.3817913  | 0.6394292  |
| H | 6.4349095  | 4.5939125  | 0.7021650  |
| C | 5.6505916  | 0.8163429  | 4.0334754  |
| C | 6.4336460  | -0.3572376 | 3.8670746  |
| H | 4.0517671  | 2.0432295  | 3.2714878  |
| H | 5.8307951  | 1.4760781  | 4.8959728  |
| H | 7.2276985  | -0.5953629 | 4.5911379  |
| H | 6.7526984  | -2.1424821 | 2.6829523  |
| C | -1.7156035 | 3.6287058  | -0.0283441 |
| C | -1.0465235 | 3.0617173  | 1.0953101  |
| C | -3.1181246 | 3.7333380  | 0.0047664  |
| C | -1.7962372 | 2.5591181  | 2.1913906  |
| C | -3.1989410 | 2.7011099  | 2.1793329  |
| C | -3.8805852 | 3.3116144  | 1.1117285  |
| H | -3.6428678 | 4.1792383  | -0.8551057 |
| C | -1.1232861 | 1.9171325  | 3.4031150  |
| H | -3.7675128 | 2.3548619  | 3.0564882  |
| C | -1.5385602 | 0.4445342  | 3.5707917  |
| H | -2.6189767 | 0.3492843  | 3.8072156  |
| H | -0.9751517 | -0.0265682 | 4.4025599  |
| H | -1.3348902 | -0.1353912 | 2.6491246  |
| C | -1.3736179 | 2.7287625  | 4.6871386  |
| H | -0.0290669 | 1.9289660  | 3.2252857  |
| H | -2.4509605 | 2.7486140  | 4.9545152  |
| H | -1.0368924 | 3.7789997  | 4.5708399  |
| H | -0.8256647 | 2.2844670  | 5.5436397  |
| C | -5.3717111 | 3.6311627  | 1.1566092  |
| C | -6.2075468 | 2.6694797  | 2.0102020  |
| H | -7.2851541 | 2.9150731  | 1.9230126  |
| H | -5.9462227 | 2.7330729  | 3.0874132  |
| H | -6.0774408 | 1.6156848  | 1.6931045  |
| C | -5.5704528 | 5.0876292  | 1.6256022  |
| H | -5.7443568 | 3.5596312  | 0.1128660  |
| H | -6.6439203 | 5.3688712  | 1.6026479  |
| H | -5.0147282 | 5.7979203  | 0.9811243  |
| H | -5.2029500 | 5.2186894  | 2.6653677  |
| C | -0.9515898 | 4.1645047  | -1.2406675 |
| C | -1.4778229 | 3.6142717  | -2.5753267 |
| H | -0.8210925 | 3.9379795  | -3.4087626 |
| H | -2.5074720 | 3.9521092  | -2.8012248 |
| H | -1.4863617 | 2.5078253  | -2.5656409 |
| C | -0.9564869 | 5.7055667  | -1.2602616 |
| H | 0.1005185  | 3.8288718  | -1.1449285 |
| H | -0.3631817 | 6.0895953  | -2.1158474 |
| H | -0.5297366 | 6.1322002  | -0.3308671 |
| H | -1.9908646 | 6.0952909  | -1.3629657 |
| H | 0.4418516  | -5.9672857 | -3.0413209 |
| H | 5.2144226  | -2.6996528 | -4.4659686 |
| H | 3.2978658  | -5.1623778 | 2.7580705  |
| C | 1.4608370  | -5.8008877 | -3.4598437 |
| H | 3.8463025  | 0.1759303  | -4.4034340 |
| H | 0.7531260  | -6.2449935 | -5.4744166 |
| H | 0.9103728  | -4.3584172 | 2.7436717  |
| C | 2.0807667  | -4.6975260 | -2.6086002 |
| C | 5.4320902  | -1.9882815 | -3.6417775 |
| C | 1.3021359  | -5.4423161 | -4.9417265 |
| H | 2.2854716  | -5.3293695 | -5.4453294 |
| C | 2.8032832  | -3.6219040 | -3.1480166 |
| C | 3.3348943  | -5.0658823 | 1.6529575  |
| H | 2.3307801  | -7.4156874 | -2.2333722 |
| C | 1.9423429  | -4.7573309 | -1.2071930 |
| C | 2.2509237  | -7.1152449 | -3.2973747 |
| H | 1.7607735  | -7.9431839 | -3.8505533 |
| H | 1.3711191  | -5.5912125 | -0.7708856 |
| C | 3.2745079  | -0.6822321 | -3.9932003 |
| H | 6.0199343  | -1.1491841 | -4.0686788 |

### TS $\gamma$ -mi; COSMO

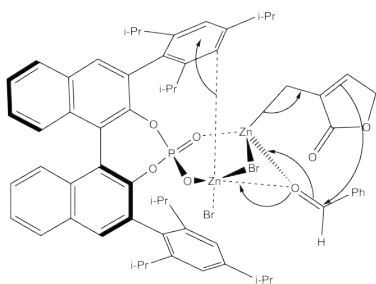

Energy (Hartree) = -11970.03975613

|   |            |            |            |
|---|------------|------------|------------|
| C | 1.2317567  | 1.8956067  | 1.0129986  |
| C | 2.6331890  | 1.8917697  | 1.0161571  |
| C | 3.3169797  | 3.1631234  | 1.0254024  |
| C | 4.7262649  | 3.2853578  | 0.8304558  |
| C | 2.5478779  | 4.3691005  | 1.2091322  |
| C | 3.2200955  | 5.6277055  | 1.2614632  |
| C | 1.1304934  | 4.2861161  | 1.2945380  |
| H | 0.5527719  | 5.2109633  | 1.4425525  |
| C | 0.4495074  | 3.0826684  | 1.1412340  |
| C | 3.7404213  | -1.6325322 | -0.0292766 |
| C | 4.8042012  | -1.8505545 | 0.8384692  |
| H | 5.3607620  | -2.7979785 | 0.7754913  |
| C | 5.1439305  | -0.9224157 | 1.8633369  |
| C | 6.1764924  | -1.2119738 | 2.8058023  |
| C | 4.3872366  | 0.2994336  | 1.9961072  |
| C | 4.6536082  | 1.1365357  | 3.1217771  |
| C | 3.3781520  | 0.6042352  | 1.0082872  |
| C | 3.0782576  | -0.3695767 | 0.0514858  |
| O | 0.5392850  | 0.6846730  | 0.9453273  |
| O | 2.1054114  | -0.0900120 | -0.9094700 |
| P | 0.5235349  | -0.1342345 | -0.4776441 |
| O | -0.2222697 | 0.6582453  | -1.5702255 |

|    |            |            |            |
|----|------------|------------|------------|
| H  | 6.0701445  | -2.5155154 | -2.9035106 |
| C  | 3.3607780  | -2.6140093 | -2.3370744 |
| C  | 0.9315664  | -4.2715646 | -1.6375830 |
| C  | 2.4977809  | -3.7927282 | -0.3493978 |
| H  | 4.3820824  | -4.8463986 | 1.3625066  |
| H  | 3.0694927  | -6.0516175 | 1.2161974  |
| C  | 4.1348853  | -1.4720026 | -2.9914038 |
| C  | 3.2112415  | -2.7014388 | -0.9302147 |
| C  | 2.3630432  | -3.9726828 | 1.1646948  |
| H  | 2.3596698  | -0.2918621 | -3.5071038 |
| H  | 0.2375185  | -3.4604833 | 1.3465923  |
| H  | 2.9602901  | -1.3145845 | -4.8494936 |
| H  | 0.7389130  | -4.4970310 | -5.0759523 |
| H  | 0.5358703  | -5.2200732 | 1.2219537  |
| H  | 3.2825458  | -7.0021718 | -3.6930010 |
| H  | 4.4346000  | -0.7676530 | -2.1880053 |
| H  | 2.6638847  | -3.0202559 | 1.6450059  |
| H  | 2.9254218  | -3.5447694 | -4.2382078 |
| Zn | -0.9433808 | -2.8192527 | -1.2900002 |
| Br | -1.6986680 | -5.0012026 | -1.0022227 |
| H  | -5.1220670 | -4.6856686 | 1.2972981  |
| H  | -5.8345423 | -3.4880917 | 3.3857166  |
| C  | -4.9441141 | -3.6046716 | 1.4019469  |
| C  | -5.3395583 | -2.9328267 | 2.5742225  |
| C  | -4.3146979 | -2.9053708 | 0.3654860  |
| C  | -5.0966120 | -1.5557302 | 2.7119554  |
| H  | -3.9917306 | -3.4346924 | -0.5432831 |
| H  | -5.3925160 | -1.0285632 | 3.6318024  |
| C  | -4.0684859 | -1.5217736 | 0.4989388  |
| C  | -4.4645631 | -0.8515126 | 1.6772398  |
| H  | -6.1311359 | 0.0952147  | -0.1033204 |
| H  | -5.0005961 | -1.5116562 | -2.1332931 |
| C  | -6.0958202 | 0.2451140  | -1.2019125 |
| C  | -4.9421161 | -0.4409111 | -1.8896522 |
| H  | -4.2401002 | 0.2205470  | 1.7868661  |
| C  | -3.3839152 | -0.7454056 | -0.5587766 |
| O  | -2.4930933 | -1.3167830 | -1.3262050 |
| H  | -7.0744629 | -0.0742070 | -1.6215949 |
| Br | -0.4296880 | -2.1121429 | -3.6581230 |
| C  | -4.3606451 | 0.5052770  | -2.7630236 |
| O  | -5.9214064 | 1.6499741  | -1.4634628 |
| H  | -3.3672373 | -0.5795161 | -4.3278930 |
| Zn | -1.6037391 | -0.1268077 | -2.7418620 |
| C  | -3.3648699 | 0.3694494  | -3.7606365 |
| C  | -4.9508167 | 1.8450850  | -2.4040422 |
| H  | -3.1776541 | 1.2769441  | -4.3620872 |
| O  | -4.6938252 | 2.9379432  | -2.8638131 |
| H  | -3.2053311 | 0.3238249  | -0.2922743 |

|   |            |            |            |
|---|------------|------------|------------|
| H | 0.5483663  | 5.2094461  | 1.4425567  |
| C | 0.4492422  | 3.0821417  | 1.1421716  |
| C | 3.7380268  | -1.6293795 | -0.0303588 |
| C | 4.8002633  | -1.8504923 | 0.8381701  |
| H | 5.3526322  | -2.8002814 | 0.7742279  |
| C | 5.1425934  | -0.9244434 | 1.8636754  |
| C | 6.1742389  | -1.2163437 | 2.8056838  |
| C | 4.3888519  | 0.2989273  | 1.9975197  |
| C | 4.6578441  | 1.1345691  | 3.1233340  |
| C | 3.3802123  | 0.6067368  | 1.0103786  |
| C | 3.0794393  | -0.3645854 | 0.0512444  |
| O | 0.5419048  | 0.6843482  | 0.9483818  |
| O | 2.1077467  | -0.0816719 | -0.9094232 |
| P | 0.5273112  | -0.1301689 | -0.4774172 |
| O | -0.2242135 | 0.6669375  | -1.5638325 |
| O | 0.0546285  | -1.5501909 | -0.1323842 |
| C | 4.5917415  | 5.7106630  | 1.1103293  |
| C | 5.3465526  | 4.5301501  | 0.8771945  |
| H | 2.6153719  | 6.5391064  | 1.4214011  |
| H | 5.0970892  | 6.6877397  | 1.1459604  |
| H | 5.3212031  | 2.3860087  | 0.6510202  |
| H | 6.4334436  | 4.5990753  | 0.7178904  |
| C | 5.6546764  | 0.8119872  | 4.0336777  |
| C | 6.4343396  | -0.3630300 | 3.8666717  |
| H | 4.0580291  | 2.0425518  | 3.2726207  |
| H | 5.8371557  | 1.4713375  | 4.8959227  |
| H | 7.2282314  | -0.6035565 | 4.5900311  |
| H | 6.7476821  | -2.1484626 | 2.6823038  |
| C | -1.7129138 | 3.6267449  | -0.0336446 |
| C | -1.0466116 | 3.0607516  | 1.0920953  |
| C | -3.1151773 | 3.7330246  | -0.0034133 |
| C | -1.7988600 | 2.5594875  | 2.1867225  |
| C | -3.2012678 | 2.7022742  | 2.1712583  |
| C | -3.8801350 | 3.3129184  | 1.1022562  |
| H | -3.6382010 | 4.1775501  | -0.8650365 |
| C | -1.1286116 | 1.9186109  | 3.4005180  |
| H | -3.7716765 | 2.3575395  | 3.0478659  |
| C | -1.5446229 | 0.4466125  | 3.5698381  |
| H | -2.6253629 | 0.3510871  | 3.8048060  |
| H | -0.9830582 | -0.0243319 | 4.4027809  |
| H | -1.3395837 | -0.1355888 | 2.6500822  |
| C | -1.3797644 | 2.7330655  | 4.6824121  |
| H | -0.0341743 | 1.9293312  | 3.2241567  |
| H | -2.4572817 | 2.7553903  | 4.9487432  |
| H | -1.0424016 | 3.7826977  | 4.5643504  |
| H | -0.8339554 | 2.2905465  | 5.5411331  |
| C | -5.3708212 | 3.6351352  | 1.1432581  |
| C | -6.2092979 | 2.6790647  | 2.0003720  |
| H | -7.2866190 | 2.9245529  | 1.9099774  |
| H | -5.9509420 | 2.7489393  | 3.0779888  |
| H | -6.0793026 | 1.6232676  | 1.6898890  |
| C | -5.5679752 | 5.0939105  | 1.6050788  |
| H | -5.7426759 | 3.5587222  | 0.0996099  |
| H | -6.6406256 | 5.3778338  | 1.5791427  |
| H | -5.0097202 | 5.7997862  | 0.9583387  |
| H | -5.2012158 | 5.2301070  | 2.6443114  |
| C | -0.9462349 | 4.1584542  | -1.2461406 |
| C | -1.4729425 | 3.6071758  | -2.5803380 |
| H | -0.8124646 | 3.9246545  | -3.4131175 |
| H | -2.5004062 | 3.9487740  | -2.8105028 |
| H | -1.4852390 | 2.5008588  | -2.5660137 |
| C | -0.9479263 | 5.6993368  | -1.2693057 |
| H | 0.1048614  | 3.8202498  | -1.1489854 |
| H | -0.3534629 | 6.0806463  | -2.1251846 |
| H | -0.5207071 | 6.1275189  | -0.3409799 |
| H | -1.9810990 | 6.0915384  | -1.3731281 |
| H | 0.4218671  | -5.9445789 | -3.0510686 |
| H | 5.2129580  | -2.7031390 | -4.4642648 |
| H | 3.2846803  | -5.1696038 | 2.7466559  |
| C | 1.4427026  | -5.7831768 | -3.4669028 |
| H | 3.8643354  | 0.1822110  | -4.4012926 |

### TS $\gamma$ -mi



Energy (Hartree) = -11970.02784245  
number of imaginary frequencies: 1

|   |           |           |           |
|---|-----------|-----------|-----------|
| C | 1.2330476 | 1.8958391 | 1.0167262 |
| C | 2.6344735 | 1.8937919 | 1.0212047 |
| C | 3.3165298 | 3.1658413 | 1.0323861 |
| C | 4.7258686 | 3.2896152 | 0.8406957 |
| C | 2.5460188 | 4.3708786 | 1.2149586 |
| C | 3.2172985 | 5.6293651 | 1.2692700 |
| C | 1.1288407 | 4.2859851 | 1.2967311 |

|    |            |            |            |
|----|------------|------------|------------|
| H  | 0.7378133  | -6.2239854 | -5.4831066 |
| H  | 0.9011281  | -4.3537910 | 2.7408017  |
| C  | 2.0662449  | -4.6831248 | -2.6143049 |
| C  | 5.4338102  | -1.9938686 | -3.6392931 |
| C  | 1.2892510  | -5.4240204 | -4.9490298 |
| H  | 2.2740282  | -5.3162486 | -5.4509943 |
| C  | 2.7952752  | -3.6110145 | -3.1512643 |
| C  | 3.3192099  | -5.0684871 | 1.6419419  |
| H  | 2.3033193  | -7.4012755 | -2.2383836 |
| C  | 1.9256522  | -4.7436016 | -1.2131256 |
| C  | 2.2267384  | -7.1007299 | -3.3024195 |
| H  | 1.7344901  | -7.9269789 | -3.8561243 |
| H  | 1.3493859  | -5.5749554 | -0.7787804 |
| C  | 3.2858133  | -0.6717055 | -3.9918366 |
| H  | 6.0286216  | -1.1590361 | -4.0647881 |
| H  | 6.0666434  | -2.5269837 | -2.9010386 |
| C  | 3.3572022  | -2.6072466 | -2.3387526 |
| C  | 0.9203854  | -4.2612102 | 1.6352474  |
| C  | 2.4864164  | -3.7838933 | -0.3533789 |
| H  | 4.3668908  | -4.8545497 | 1.3493429  |
| H  | 3.0480170  | -6.0509545 | 1.2018289  |
| C  | 4.1393040  | -1.4692361 | -2.9905259 |
| C  | 3.2057977  | -2.6956949 | -0.9323435 |
| C  | 2.3523759  | -3.9679965 | 1.1603139  |
| H  | 2.3745582  | -0.2730904 | -3.5060856 |
| H  | 0.2300060  | -3.4442557 | 1.3524305  |
| H  | 2.9664160  | -1.3000148 | -4.8491033 |
| H  | 0.7299069  | -4.4769076 | -5.0853452 |
| H  | 0.5161474  | -5.2044736 | 1.2161886  |
| H  | 3.2598924  | -6.9926199 | -3.6949972 |
| H  | 4.4427299  | -0.7682249 | -2.1855315 |
| H  | 2.6596253  | -3.0192578 | 1.6439278  |
| H  | 2.9196765  | -3.5339007 | -4.2411344 |
| Zn | -0.9161081 | -2.8355585 | -1.2984059 |
| Br | -1.6985238 | -5.0037534 | -1.0224252 |
| H  | -5.0675664 | -4.7046262 | 1.3362095  |
| H  | -5.8095304 | -3.4970211 | 3.4095665  |
| C  | -4.9107667 | -3.6194726 | 1.4303900  |
| C  | -5.3207371 | -2.9424066 | 2.5938603  |
| C  | -4.2885288 | -2.9214728 | 0.3888491  |
| C  | -5.0973794 | -1.5612037 | 2.7192950  |
| H  | -3.9479435 | -3.4569142 | -0.5102055 |
| H  | -5.4023114 | -1.0292176 | 3.6334104  |
| C  | -4.0631641 | -1.5336383 | 0.5098754  |
| C  | -4.4708032 | -0.8579663 | 1.6808801  |
| H  | -6.1243915 | 0.0724011  | -0.0940149 |
| H  | -4.9884881 | -1.5294845 | -2.1230227 |
| C  | -6.0864228 | 0.2266990  | -1.1920629 |
| C  | -4.9280152 | -0.4594636 | -1.8757815 |
| H  | -4.2581879 | 0.2173851  | 1.7825433  |
| C  | -3.3854364 | -0.7580156 | -0.5549243 |
| O  | -2.4924599 | -1.3317034 | -1.3192432 |
| H  | -7.0639060 | -0.0943648 | -1.6151723 |
| Br | -0.4198472 | -2.0907088 | -3.6677911 |
| C  | -4.3532738 | 0.4885670  | -2.7544895 |
| O  | -5.9134090 | 1.6298937  | -1.4491604 |
| H  | -3.3495603 | -0.5920454 | -4.3184134 |
| Zn | -1.6000375 | -0.1418371 | -2.7167949 |
| C  | -3.3596214 | 0.3574516  | -3.7527515 |
| C  | -4.9411740 | 1.8294852  | -2.3910835 |
| H  | -3.1753891 | 1.2682019  | -4.3501572 |
| O  | -4.6801003 | 2.9212361  | -2.8455398 |
| H  | -3.2047602 | 0.3106147  | -0.2859000 |

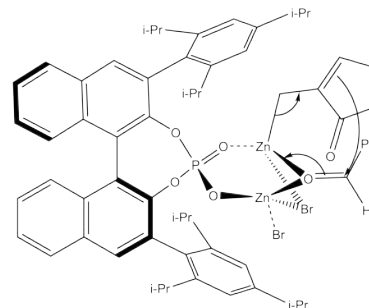

Energy (Hartree) = -11970.03155490

|   |            |            |            |
|---|------------|------------|------------|
| C | 1.3389161  | 2.1675830  | 1.0027844  |
| C | 2.7361094  | 2.0910274  | 0.9810502  |
| C | 3.4717655  | 3.3273033  | 0.8750822  |
| C | 4.8806302  | 3.3635650  | 0.6501929  |
| C | 2.7583532  | 4.5787725  | 0.9681544  |
| C | 3.4866766  | 5.8027297  | 0.8764078  |
| C | 1.3461076  | 4.5697896  | 1.1604712  |
| H | 0.8221085  | 5.5257353  | 1.3123892  |
| C | 0.6151476  | 3.3878701  | 1.1589402  |
| C | 3.6160875  | -1.6077947 | 0.4031176  |
| C | 4.6087175  | -1.8009466 | 1.3567215  |
| H | 5.0876916  | -2.7884947 | 1.4391733  |
| C | 4.9878333  | -0.7756444 | 2.2694176  |
| C | 5.9510100  | -1.0240186 | 3.2933980  |
| C | 4.3490295  | 0.5174859  | 2.1974116  |
| C | 4.6557857  | 1.4755511  | 3.2110444  |
| C | 3.4063140  | 0.7687782  | 1.1318585  |
| C | 3.0629556  | -0.2960725 | 0.2948843  |
| O | 0.5820629  | 0.9965352  | 0.9705791  |
| O | 2.1615966  | -0.0655788 | -0.7410851 |
| P | 0.5667622  | 0.1139627  | -0.4103081 |
| O | 0.0053286  | 0.8983628  | -1.6105761 |
| O | -0.1128567 | -1.2044331 | -0.0120522 |
| C | 4.8588604  | 5.8028546  | 0.6732038  |
| C | 5.5568507  | 4.5716657  | 0.5480243  |
| H | 2.9326383  | 6.7510277  | 0.9584237  |
| H | 5.4068538  | 6.7543207  | 0.5967084  |
| H | 5.4283245  | 2.4163173  | 0.5438259  |
| H | 6.6417993  | 4.5748646  | 0.3625630  |
| C | 5.5829543  | 1.1956131  | 4.2058349  |
| C | 6.2518257  | -0.0569413 | 4.2404620  |
| H | 4.1420262  | 2.4463918  | 3.2068938  |
| H | 5.7964423  | 1.9510005  | 4.9775126  |
| H | 6.9919717  | -0.2634810 | 5.0284809  |
| H | 6.4388338  | -2.0109436 | 3.3257670  |
| C | -1.7877034 | 3.7276119  | 0.4155430  |
| C | -0.8595243 | 3.3555908  | 1.4224717  |
| C | -3.1606092 | 3.7378542  | 0.7327483  |
| C | -1.3206410 | 2.9521544  | 2.7075885  |
| C | -2.7023933 | 2.9633931  | 2.9656587  |
| C | -3.6413278 | 3.3646104  | 1.9984852  |
| H | -3.8843801 | 4.0414884  | -0.0400819 |
| C | -0.3660487 | 2.5004791  | 3.8125047  |
| H | -3.0561964 | 2.6515459  | 3.9616983  |
| C | -0.5558465 | 1.0064879  | 4.1377488  |
| H | -1.5665012 | 0.8101749  | 4.5539612  |
| H | 0.1877934  | 0.6732483  | 4.8911947  |
| H | -0.4303847 | 0.3849016  | 3.2295234  |
| C | -0.4898588 | 3.3775249  | 5.0710913  |
| H | 0.6703288  | 2.6244931  | 3.4379808  |
| H | -1.4942464 | 3.2897541  | 5.5356079  |
| H | -0.3219543 | 4.4478425  | 4.8340144  |
| H | 0.2561979  | 3.0730549  | 5.8340136  |
| C | -5.1330069 | 3.3807805  | 2.3107583  |
| C | -5.6676803 | 1.9657481  | 2.5976708  |

TS<sub>dis.</sub> = TS $\gamma$ -sim.-mi; COSMO

|    |            |            |            |    |            |            |            |
|----|------------|------------|------------|----|------------|------------|------------|
| H  | -6.7647799 | 1.9810130  | 2.7641969  | Br | -0.0839836 | -2.1887447 | -3.4468288 |
| H  | -5.1963347 | 1.5374606  | 3.5067416  | Zn | -1.1872992 | -2.3026925 | -1.2501277 |
| H  | -5.4577172 | 1.2739870  | 1.7566913  | H  | -6.5649783 | -3.5868508 | -1.9886903 |
| C  | -5.4675012 | 4.3484581  | 3.4598860  | H  | -1.9911251 | -4.6239807 | -0.5179633 |
| H  | -5.6482666 | 3.7600551  | 1.3998673  | C  | -4.6844774 | -2.6361010 | -1.4393725 |
| H  | -6.5627410 | 4.3953586  | 3.6322080  | C  | -5.6614583 | -3.1452639 | -2.4656440 |
| H  | -5.1077804 | 5.3737810  | 3.2401631  | H  | -4.9958133 | -1.9806572 | -0.6146402 |
| H  | -4.9941497 | 4.0229781  | 4.4097956  | C  | -3.6415179 | -3.5620235 | -1.3571450 |
| C  | -1.3330472 | 4.1056722  | -0.9914508 | C  | -2.5292860 | -3.6586954 | -0.4765867 |
| C  | -2.1860917 | 3.4376610  | -2.0795642 | C  | -3.7913248 | -4.4862421 | -2.5402739 |
| H  | -1.7333075 | 3.5808311  | -3.0804359 | O  | -4.9622839 | -4.1775024 | -3.1801850 |
| H  | -3.2162894 | 3.8483525  | -2.1235020 | O  | -3.0555854 | -5.3771997 | -2.9039696 |
| H  | -2.2738958 | 2.3470830  | -1.9086871 | H  | -6.0101679 | -2.3838171 | -3.1939035 |
| C  | -1.3009539 | 5.6337562  | -1.1813457 | H  | -2.6665852 | -3.2474754 | 0.5398192  |
| H  | -0.2976029 | 3.7243702  | -1.1123437 | H  | -3.5284562 | -1.5880466 | -3.4278500 |
| H  | -0.9506385 | 5.8954115  | -2.2012256 |    |            |            |            |
| H  | -0.6267363 | 6.1256573  | -0.4521254 |    |            |            |            |
| H  | -2.3138537 | 6.0688203  | -1.0476326 |    |            |            |            |
| H  | 1.8479978  | -6.9984533 | -2.1940925 |    |            |            |            |
| H  | 5.5033420  | -3.1904801 | -3.7287485 |    |            |            |            |
| H  | 2.4817659  | -4.6495253 | 3.5055719  |    |            |            |            |
| C  | 1.6301270  | -6.0984066 | -2.8144905 |    |            |            |            |
| H  | 4.3017934  | -0.2782248 | -4.0697360 |    |            |            |            |
| H  | -0.2897093 | -6.9361591 | -3.4874978 |    |            |            |            |
| H  | 0.1515144  | -3.8252481 | 2.9646642  |    |            |            |            |
| C  | 2.1505436  | -4.9037714 | -2.0171377 |    |            |            |            |
| C  | 5.6742916  | -2.4219666 | -2.9460914 |    |            |            |            |
| C  | 0.1016622  | -6.0259253 | -2.9892371 |    |            |            |            |
| H  | -0.1887660 | -5.1526611 | -3.6074594 |    |            |            |            |
| C  | 2.9702788  | -3.9080343 | -2.5708504 |    |            |            |            |
| C  | 2.7142022  | -4.7038106 | 2.4217169  |    |            |            |            |
| H  | 3.4221220  | -6.3607124 | -4.0709212 |    |            |            |            |
| C  | 1.7974338  | -4.7749601 | -0.6587790 |    |            |            |            |
| C  | 2.3195496  | -6.2949745 | -4.1695824 |    |            |            |            |
| H  | 1.9640876  | -7.2286798 | -4.6500194 |    |            |            |            |
| H  | 1.1598276  | -5.5512938 | -0.2047653 |    |            |            |            |
| C  | 3.6387439  | -1.0535672 | -3.6330527 |    |            |            |            |
| H  | 6.3500223  | -1.6530890 | -3.3747296 |    |            |            |            |
| H  | 6.2020815  | -2.9129664 | -2.1032010 |    |            |            |            |
| C  | 3.4458182  | -2.8188324 | -1.8137402 |    |            |            |            |
| C  | 0.3734971  | -3.9048431 | 1.8806155  |    |            |            |            |
| C  | 2.2506150  | -3.7146536 | 0.1449810  |    |            |            |            |
| H  | 3.8009413  | -4.5270980 | 2.2961462  |    |            |            |            |
| H  | 2.5046972  | -5.7391124 | 2.0796100  |    |            |            |            |
| C  | 4.3507784  | -1.7861126 | -2.4822029 |    |            |            |            |
| C  | 3.0972822  | -2.7288791 | -0.4428483 |    |            |            |            |
| C  | 1.8739728  | -3.6843368 | 1.6277700  |    |            |            |            |
| H  | 2.7149160  | -0.5591423 | -3.2755283 |    |            |            |            |
| H  | -0.2253417 | -3.1379108 | 1.3551333  |    |            |            |            |
| H  | 3.3560374  | -1.7515395 | -4.4483108 |    |            |            |            |
| H  | -0.4281257 | -5.9268842 | -2.0221734 |    |            |            |            |
| H  | 0.0343741  | -4.9089232 | 1.5509619  |    |            |            |            |
| H  | 2.0879186  | -5.4612747 | -4.8652509 |    |            |            |            |
| H  | 4.6102865  | -1.0239818 | -1.7187656 |    |            |            |            |
| H  | 2.1179499  | -2.6733305 | 2.0136256  |    |            |            |            |
| H  | 3.2578275  | -3.9712757 | -3.6301903 |    |            |            |            |
| Zn | -0.9748716 | 0.1396536  | -3.1292122 |    |            |            |            |
| Br | -1.9375790 | 1.1066052  | -4.9897382 |    |            |            |            |
| C  | -6.7168672 | 1.9594825  | -2.4421921 |    |            |            |            |
| C  | -3.5994001 | -0.9791220 | -2.4964127 |    |            |            |            |
| C  | -5.8338376 | 1.8548498  | -1.3504306 |    |            |            |            |
| C  | -5.5607903 | 0.1373882  | -3.5577846 |    |            |            |            |
| C  | -4.6823292 | 0.0182782  | -2.4565815 |    |            |            |            |
| C  | -6.5735077 | 1.1062783  | -3.5492638 |    |            |            |            |
| C  | -4.8158163 | 0.8958250  | -1.3558833 |    |            |            |            |
| O  | -2.5205425 | -0.7757746 | -1.8058590 |    |            |            |            |
| H  | -7.5123949 | 2.7201557  | -2.4334537 |    |            |            |            |
| H  | -5.4151950 | -0.5034571 | -4.4415069 |    |            |            |            |
| H  | -5.9389791 | 2.5345871  | -0.4922507 |    |            |            |            |
| H  | -7.2449355 | 1.2054324  | -4.4153696 |    |            |            |            |
| H  | -4.1028149 | 0.8219490  | -0.5202754 |    |            |            |            |

$TS_{dis.} = TS_{\gamma-sim.-mi}$

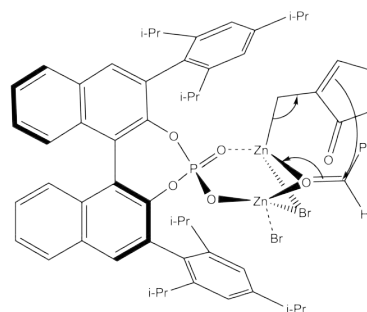

Energy (Hartree) = -11970.01887676  
number of imaginary frequencies: 1

|   |            |            |            |
|---|------------|------------|------------|
| C | 1.3356999  | 2.1647110  | 1.0009531  |
| C | 2.7330043  | 2.0894405  | 0.9805570  |
| C | 3.4679247  | 3.3259966  | 0.8751740  |
| C | 4.8768451  | 3.3628909  | 0.6524913  |
| C | 2.7539867  | 4.5769995  | 0.9667968  |
| C | 3.4821817  | 5.8005334  | 0.8754242  |
| C | 1.3418369  | 4.5666643  | 1.1576961  |
| H | 0.8161680  | 5.5218074  | 1.3088782  |
| C | 0.6113034  | 3.3847379  | 1.1562236  |
| C | 3.6149705  | -1.6084766 | 0.4027460  |
| C | 4.6069356  | -1.8007605 | 1.3569236  |
| H | 5.0856372  | -2.7884823 | 1.4388609  |
| C | 4.9854754  | -0.7759028 | 2.2699749  |
| C | 5.9479665  | -1.0230772 | 3.2942219  |
| C | 4.3462372  | 0.5167885  | 2.1975975  |
| C | 4.6525556  | 1.4750704  | 3.2108392  |
| C | 3.4039704  | 0.7677261  | 1.1317111  |
| C | 3.0613572  | -0.2968842 | 0.2939669  |
| O | 0.5796725  | 0.9938472  | 0.9679816  |
| O | 2.1617292  | -0.0667926 | -0.7421807 |
| P | 0.5661669  | 0.1117477  | -0.4141939 |
| O | 0.0035025  | 0.8953230  | -1.6130843 |
| O | -0.1094661 | -1.2089813 | -0.0153241 |
| C | 4.8541582  | 5.8013871  | 0.6743876  |
| C | 5.5525109  | 4.5708649  | 0.5509569  |
| H | 2.9275742  | 6.7486353  | 0.9557209  |
| H | 5.4016738  | 6.7530862  | 0.5980896  |
| H | 5.4243196  | 2.4154692  | 0.5476834  |
| H | 6.6376963  | 4.5743155  | 0.3672217  |
| C | 5.5793762  | 1.1957032  | 4.2055502  |
| C | 6.2482963  | -0.0561541 | 4.2408428  |
| H | 4.1385642  | 2.4457135  | 3.2053452  |
| H | 5.7926384  | 1.9515212  | 4.9768034  |
| H | 6.9882442  | -0.2624265 | 5.0290523  |
| H | 6.4359167  | -2.0099165 | 3.3271019  |



|   |            |            |            |    |            |            |            |
|---|------------|------------|------------|----|------------|------------|------------|
| C | -1.7915920 | 3.7263827  | 0.4143825  | H  | 0.0331723  | -4.9089026 | 1.5515846  |
| C | -0.8631905 | 3.3534981  | 1.4205208  | H  | 2.0901936  | -5.4622973 | -4.8652936 |
| C | -3.1635605 | 3.7416598  | 0.7345498  | H  | 4.6106474  | -1.0254447 | -1.7176331 |
| C | -1.3230864 | 2.9528880  | 2.7067118  | H  | 2.1177523  | -2.6743942 | 2.0131867  |
| C | -2.7039336 | 2.9692421  | 2.9672149  | H  | 3.2583690  | -3.9718965 | -3.6296864 |
| C | -3.6429281 | 3.3726398  | 2.0016369  | Zn | -0.9752914 | 0.1394305  | -3.1353630 |
| H | -3.8875006 | 4.0463849  | -0.0377278 | Br | -1.9629976 | 1.1029203  | -4.9798973 |
| C | -0.3679662 | 2.4983049  | 3.8098549  | C  | -6.7158439 | 1.9550014  | -2.4250768 |
| H | -3.0566920 | 2.6597589  | 3.9643428  | C  | -3.5931916 | -0.9788363 | -2.4968971 |
| C | -0.5621442 | 1.0051265  | 4.1357754  | C  | -5.8352845 | 1.8422407  | -1.3327569 |
| H | -1.5725010 | 0.8120160  | 4.5541001  | C  | -5.5531998 | 0.1466126  | -3.5545686 |
| H | 0.1818146  | 0.6690661  | 4.8875715  | C  | -4.6779194 | 0.0179800  | -2.4525287 |
| H | -0.4413545 | 0.3829375  | 3.2274984  | C  | -6.5678688 | 1.1129465  | -3.5394645 |
| C | -0.4852472 | 3.3767829  | 5.0679372  | C  | -4.8153867 | 0.8853910  | -1.3448726 |
| H | 0.6679875  | 2.6183674  | 3.4330170  | O  | -2.5176879 | -0.7790721 | -1.8035315 |
| H | -1.4886519 | 3.2938830  | 5.5353357  | H  | -7.5129775 | 2.7139390  | -2.4114221 |
| H | -0.3141803 | 4.4461524  | 4.8296410  | H  | -5.4004531 | -0.4825732 | -4.4454495 |
| H | 0.2611906  | 3.0703034  | 5.8296156  | H  | -5.9422111 | 2.5136011  | -0.4682785 |
| C | -5.1336495 | 3.3971046  | 2.3180726  | H  | -7.2364961 | 1.2198157  | -4.4067890 |
| C | -5.6758821 | 1.9858291  | 2.6090861  | H  | -4.1026501 | 0.8069018  | -0.5094113 |
| H | -6.7724621 | 2.0065939  | 2.7787963  | Br | -0.0856153 | -2.1910915 | -3.4537012 |
| H | -5.2045042 | 1.5566797  | 3.5175637  | Zn | -1.1798289 | -2.3050072 | -1.2564114 |
| H | -5.4712571 | 1.2909892  | 1.7694911  | H  | -6.5553051 | -3.5907686 | -2.0085861 |
| C | -5.4602464 | 4.3693315  | 3.4654890  | H  | -1.9832116 | -4.6271000 | -0.5280995 |
| H | -5.6491755 | 3.7774277  | 1.4074305  | C  | -4.6765218 | -2.6390166 | -1.4478323 |
| H | -6.5546040 | 4.4232963  | 3.6414136  | C  | -5.6485852 | -3.1481099 | -2.4803291 |
| H | -5.0947045 | 5.3916497  | 3.2426144  | H  | -4.9917159 | -1.9851725 | -0.6232131 |
| H | -4.9858822 | 4.0440115  | 4.4147625  | C  | -3.6334483 | -3.5645853 | -1.3638016 |
| C | -1.3387209 | 4.0987330  | -0.9947192 | C  | -2.5227807 | -3.6629297 | -0.4828741 |
| C | -2.1962800 | 3.4304680  | -2.0790477 | C  | -3.7767669 | -4.4873270 | -2.5513166 |
| H | -1.7462027 | 3.5677186  | -3.0817295 | O  | -4.9481721 | -4.1754770 | -3.1950731 |
| H | -3.2253288 | 3.8441091  | -2.1228597 | O  | -3.0387501 | -5.3744923 | -2.9112432 |
| H | -2.2869202 | 2.3407441  | -1.9050435 | H  | -5.9953820 | -2.3824456 | -3.2057232 |
| C | -1.3017788 | 5.6260292  | -1.1891994 | H  | -2.6580085 | -3.2537531 | 0.5345537  |
| H | -0.3049585 | 3.7133736  | -1.1170043 | H  | -3.5195681 | -1.5814951 | -3.4326540 |
| H | -0.9528421 | 5.8833785  | -2.2104903 |    |            |            |            |
| H | -0.6244112 | 6.1181239  | -0.4631701 |    |            |            |            |
| H | -2.3125845 | 6.0654541  | -1.0545830 |    |            |            |            |
| H | 1.8525315  | -6.9996826 | -2.1946369 |    |            |            |            |
| H | 5.5040130  | -3.1922902 | -3.7270617 |    |            |            |            |
| H | 2.4816796  | -4.6505376 | 3.5054911  |    |            |            |            |
| C | 1.6326925  | -6.0999684 | -2.8150718 |    |            |            |            |
| H | 4.3030899  | -0.2783652 | -4.0683540 |    |            |            |            |
| H | -0.2867396 | -6.9400852 | -3.4892912 |    |            |            |            |
| H | 0.1510702  | -3.8250522 | 2.9645757  |    |            |            |            |
| C | 2.1514523  | -4.9048936 | -2.0175123 |    |            |            |            |
| C | 5.6745540  | -2.4237673 | -2.9444895 |    |            |            |            |
| C | 0.1043372  | -6.0299924 | -2.9911347 |    |            |            |            |
| H | -0.1878736 | -5.1576006 | -3.6094279 |    |            |            |            |
| C | 2.9706726  | -3.9088116 | -2.5704711 |    |            |            |            |
| C | 2.7134008  | -4.7048295 | 2.4215147  |    |            |            |            |
| H | 3.4257409  | -6.3597627 | -4.0706274 |    |            |            |            |
| C | 1.7980575  | -4.7759093 | -0.6594973 |    |            |            |            |
| C | 2.3231901  | -6.2954756 | -4.1696384 |    |            |            |            |
| H | 1.9692469  | -7.2292450 | -4.6508083 |    |            |            |            |
| H | 1.1612812  | -5.5530350 | -0.2056059 |    |            |            |            |
| C | 3.6398433  | -1.0536251 | -3.6320990 |    |            |            |            |
| H | 6.3512439  | -1.6557030 | -3.3729339 |    |            |            |            |
| H | 6.2013608  | -2.9154561 | -2.1016041 |    |            |            |            |
| C | 3.4458525  | -2.8197458 | -1.8135235 |    |            |            |            |
| C | 0.3732087  | -3.9048542 | 1.8806036  |    |            |            |            |
| C | 2.2504230  | -3.7157228 | 0.1444677  |    |            |            |            |
| H | 3.7999994  | -4.5287105 | 2.2955418  |    |            |            |            |
| H | 2.5042843  | -5.7401521 | 2.0796306  |    |            |            |            |
| C | 4.3511639  | -1.7871408 | -2.4815433 |    |            |            |            |
| C | 3.0969835  | -2.7299228 | -0.4429681 |    |            |            |            |
| C | 1.8736625  | -3.6853435 | 1.6273038  |    |            |            |            |
| H | 2.7166284  | -0.5584133 | -3.2746790 |    |            |            |            |
| H | -0.2248188 | -3.1372163 | 1.3552569  |    |            |            |            |
| H | 3.3567387  | -1.7504450 | -4.4480951 |    |            |            |            |
| H | -0.4266870 | -5.9324006 | -2.0247060 |    |            |            |            |

### TS<sub>1</sub>-2-mi; COSMO

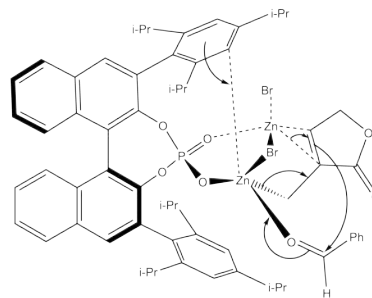

Energy (Hartree) = -11970.02628908

|   |           |            |           |
|---|-----------|------------|-----------|
| C | 1.1724160 | 2.6115243  | 1.0846563 |
| C | 2.5674776 | 2.5191403  | 1.1469338 |
| C | 3.3200025 | 3.7500002  | 1.1498723 |
| C | 4.7426687 | 3.7826814  | 1.0394597 |
| C | 2.6089693 | 5.0043083  | 1.2229077 |
| C | 3.3502820 | 6.2239238  | 1.2435703 |
| C | 1.1840007 | 5.0088223  | 1.2518229 |
| H | 0.6585909 | 5.9713584  | 1.3439135 |
| C | 0.4425082 | 3.8384237  | 1.1473474 |
| C | 3.3466180 | -1.1313927 | 0.2453506 |
| C | 4.3038756 | -1.4603506 | 1.1977842 |
| H | 4.7121551 | -2.4827229 | 1.2197917 |
| C | 4.7092069 | -0.5353799 | 2.2038187 |
| C | 5.6374299 | -0.9169617 | 3.2191657 |
| C | 4.1161593 | 0.7819190  | 2.2491961 |
| C | 4.4277522 | 1.6230934  | 3.3598064 |
| C | 3.2126668 | 1.1754079  | 1.1939544 |
| C | 2.8760975 | 0.2160023  | 0.2357626 |
| O | 0.4160955 | 1.4321561  | 0.9607223 |

|   |            |            |            |    |            |            |            |
|---|------------|------------|------------|----|------------|------------|------------|
| O | 2.0337560  | 0.5783173  | -0.8113388 | H  | 0.4086215  | -4.7025205 | -0.4560529 |
| P | 0.4327430  | 0.8180834  | -0.5496967 | C  | 3.1632848  | -0.2854075 | -3.7939860 |
| O | 0.0194929  | 1.8877444  | -1.5783667 | H  | 5.7949261  | -1.1741496 | -3.7185817 |
| O | -0.3611575 | -0.4919919 | -0.5787727 | H  | 5.5850851  | -2.4653878 | -2.4874794 |
| C | 4.7347929  | 6.2191377  | 1.1610125  | C  | 2.8709294  | -2.1166607 | -2.0501372 |
| C | 5.4327050  | 4.9873234  | 1.0436076  | C  | -0.0101228 | -2.9696669 | 1.7709013  |
| H | 2.7966441  | 7.1735586  | 1.3109271  | C  | 1.7770206  | -3.0678560 | -0.0559189 |
| H | 5.2932077  | 7.1675593  | 1.1701902  | H  | 3.1908420  | -4.4140987 | 1.9270018  |
| H | 5.2930864  | 2.8369038  | 0.9375464  | H  | 1.6444944  | -5.2805146 | 1.6857873  |
| H | 6.5292723  | 4.9871227  | 0.9484904  | C  | 3.8425036  | -1.1440072 | -2.7149759 |
| C | 5.3217584  | 1.2143662  | 4.3403700  | C  | 2.6856619  | -2.1392806 | -0.6417062 |
| C | 5.9472948  | -0.0586073 | 4.2634684  | C  | 1.4888622  | -3.1003863 | 1.4468023  |
| H | 3.9455422  | 2.6069110  | 3.4393392  | H  | 2.2824384  | 0.2404847  | -3.3744279 |
| H | 5.5421894  | 1.8817778  | 5.1874425  | H  | -0.4443135 | -2.0758208 | 1.2827839  |
| H | 6.6607785  | -0.3682469 | 5.0422606  | H  | 2.8070103  | -0.8923904 | -4.6515048 |
| H | 6.0904202  | -1.9194254 | 3.1653197  | H  | -0.6898627 | -3.5506167 | -4.2237224 |
| C | -1.7993010 | 4.1989522  | -0.0017927 | H  | -0.5828546 | -3.8630531 | 1.4431248  |
| C | -1.0559266 | 3.8117466  | 1.1483776  | H  | 2.3564444  | -5.8779784 | -4.0508339 |
| C | -3.2040548 | 4.1052721  | 0.0446232  | H  | 4.2157892  | -0.4532449 | -1.9314785 |
| C | -1.7307340 | 3.3508308  | 2.3129008  | H  | 1.9833087  | -2.2196995 | 1.9022443  |
| C | -3.1331523 | 3.2769227  | 2.3022356  | H  | 2.3088722  | -3.0105471 | -3.9377053 |
| C | -3.8918484 | 3.6397368  | 1.1776323  | Zn | 0.3282054  | 2.0327264  | -3.4761763 |
| H | -3.7917480 | 4.3988815  | -0.8398875 | Br | 1.5984686  | 3.5246560  | -4.6458253 |
| C | -0.9787107 | 2.9530686  | 3.5823685  | C  | -3.7155528 | -7.4161177 | -2.0172436 |
| H | -3.6475829 | 2.9016378  | 3.2008162  | C  | -2.3711149 | -3.3876207 | -1.3000663 |
| C | -1.2277884 | 1.4859909  | 3.9737520  | C  | -3.8550497 | -6.4356096 | -3.0183119 |
| H | -2.2921991 | 1.3082489  | 4.2314823  | C  | -2.7200464 | -5.7608301 | -0.5397738 |
| H | -0.6150793 | 1.2142754  | 4.8586982  | C  | -2.8678158 | -4.7711902 | -1.5354959 |
| H | -0.9802968 | 0.8036993  | 3.1391950  | C  | -3.1438156 | -7.0774374 | -0.7799683 |
| C | -1.3060437 | 3.9158594  | 4.7392500  | C  | -3.4320089 | -5.1224983 | -2.7815019 |
| H | 0.1068830  | 3.0575483  | 3.3803921  | O  | -2.0199824 | -2.6889942 | -2.3304174 |
| H | -2.3800221 | 3.8647822  | 5.0162687  | H  | -4.0450518 | -8.4490941 | -2.2076393 |
| H | -1.0798775 | 4.9669467  | 4.4661374  | H  | -2.2396029 | -5.5044492 | 0.4183520  |
| H | -0.7144895 | 3.6597903  | 5.6428623  | H  | -4.2918833 | -6.7036199 | -3.9927476 |
| C | -5.4093462 | 3.5026103  | 1.1697111  | H  | -3.0161045 | -7.8445501 | -0.0010275 |
| C | -5.8318208 | 2.0212772  | 1.1775283  | H  | -3.5136661 | -4.3482461 | -3.5591169 |
| H | -6.9371261 | 1.9241532  | 1.1429302  | Br | -0.8491267 | 0.0461633  | -4.2855706 |
| H | -5.4701561 | 1.5095365  | 2.0932986  | Zn | -1.6188491 | -0.8062493 | -2.0875836 |
| H | -5.4073740 | 1.4789299  | 0.3093986  | H  | -3.7828552 | -3.9419233 | 1.1128535  |
| C | -6.0706980 | 4.2790819  | 2.3215451  | H  | -4.1361288 | -0.2827072 | -2.4281255 |
| H | -5.7684665 | 3.9485764  | 0.2156763  | C  | -4.1227560 | -2.4894013 | -0.5251276 |
| H | -7.1767612 | 4.2213252  | 2.2521532  | C  | -4.2499698 | -2.9567555 | 0.9057664  |
| H | -5.7795714 | 5.3489213  | 2.3072457  | H  | -4.7861798 | -2.8889113 | -1.3053498 |
| H | -5.7792044 | 3.8644689  | 3.3091824  | C  | -3.7421815 | -1.1302252 | -0.4740690 |
| C | -1.1270276 | 4.7266919  | -1.2690684 | C  | -3.5678355 | -0.1702549 | -1.4898437 |
| C | -1.7721399 | 4.1938875  | -2.5622663 | C  | -3.3066087 | -0.8523020 | 0.9412489  |
| H | -1.1288229 | 4.4277402  | -3.4371019 | O  | -3.5754534 | -1.9631685 | 1.6991381  |
| H | -2.7595361 | 4.6581711  | -2.7647741 | O  | -2.8192349 | 0.1573060  | 1.3982858  |
| H | -1.9375478 | 3.0976105  | -2.5103753 | H  | -5.3115948 | -3.0147323 | 1.2339466  |
| C | -1.1036793 | 6.2673550  | -1.2915816 | H  | -3.3662204 | 0.8633553  | -1.1506581 |
| H | -0.0762711 | 4.3725744  | -1.2570289 | H  | -1.8098719 | -3.2524945 | -0.3478397 |
| H | -0.5844657 | 6.6390587  | -2.1994299 |    |            |            |            |
| H | -0.5822998 | 6.6826990  | -0.4070148 |    |            |            |            |
| H | -2.1356263 | 6.6771259  | -1.2936427 |    |            |            |            |
| H | -0.3001606 | -5.3831618 | -2.5508792 |    |            |            |            |
| H | 4.7711583  | -2.6016315 | -4.0772486 |    |            |            |            |
| H | 1.9222446  | -4.3538816 | 3.1961669  |    |            |            |            |
| C | 0.5516280  | -5.0029419 | -3.1559578 |    |            |            |            |
| H | 3.8553839  | 0.4854898  | -4.1887426 |    |            |            |            |
| H | -0.6378314 | -5.1782590 | -4.9790017 |    |            |            |            |
| H | -0.1643885 | -2.8728966 | 2.8649067  |    |            |            |            |
| C | 1.2739307  | -3.9740301 | -2.2946178 |    |            |            |            |
| C | 5.0672104  | -1.8879765 | -3.2800410 |    |            |            |            |
| C | -0.0336481 | -4.4139382 | -4.4481023 |    |            |            |            |
| H | 0.7609016  | -4.0798734 | -5.1477256 |    |            |            |            |
| C | 2.1602911  | -3.0322713 | -2.8469397 |    |            |            |            |
| C | 2.0969734  | -4.3548506 | 2.1001830  |    |            |            |            |
| H | 1.8600950  | -6.6551464 | -2.5156832 |    |            |            |            |
| C | 1.1064761  | -3.9730563 | -0.8992590 |    |            |            |            |
| C | 1.4782170  | -6.1986599 | -3.4513771 |    |            |            |            |
| H | 0.9422339  | -6.9834377 | -4.0250213 |    |            |            |            |

### TS $\nu$ -2-mi

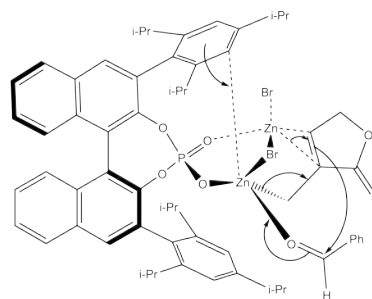

Energy (Hartree) = -11970.01637317  
number of imaginary frequencies: 1

|   |           |           |           |
|---|-----------|-----------|-----------|
| C | 1.1725174 | 2.6067242 | 1.0819063 |
| C | 2.5676817 | 2.5167485 | 1.1466925 |
| C | 3.3180005 | 3.7487990 | 1.1531678 |
| C | 4.7406009 | 3.7841346 | 1.0466891 |

|   |            |            |            |    |            |            |            |
|---|------------|------------|------------|----|------------|------------|------------|
| C | 2.6047871  | 5.0016107  | 1.2262520  | H  | 1.9251035  | -4.3500549 | 3.1957459  |
| C | 3.3443411  | 6.2216298  | 1.2504859  | C  | 0.5558569  | -5.0034664 | -3.1568297 |
| C | 1.1800683  | 5.0030959  | 1.2522070  | H  | 3.8601467  | 0.4853222  | -4.1909808 |
| H | 0.6517403  | 5.9640009  | 1.3443271  | H  | -0.6318853 | -5.1818964 | -4.9811288 |
| C | 0.4401897  | 3.8321805  | 1.1451044  | H  | -0.1633872 | -2.8685175 | 2.8612642  |
| C | 3.3516453  | -1.1321027 | 0.2430417  | C  | 1.2777344  | -3.9737406 | -2.2961323 |
| C | 4.3079839  | -1.4605572 | 1.1962473  | C  | 5.0720881  | -1.8900637 | -3.2814853 |
| H | 4.7158508  | -2.4831165 | 1.2175691  | C  | -0.0284461 | -4.4168722 | -4.4504800 |
| C | 4.7119343  | -0.5363300 | 2.2031379  | H  | 0.7662400  | -4.0845174 | -5.1505651 |
| C | 5.6394373  | -0.9167821 | 3.2188669  | C  | 2.1644071  | -3.0326586 | -2.8483502 |
| C | 4.1176471  | 0.7802298  | 2.2487186  | C  | 2.0998852  | -4.3516764 | 2.0998187  |
| C | 4.4278335  | 1.6209581  | 3.3597293  | H  | 1.8642800  | -6.6537572 | -2.5125246 |
| C | 3.2149051  | 1.1739309  | 1.1929778  | C  | 1.1103618  | -3.9721394 | -0.9010280 |
| C | 2.8804943  | 0.2150709  | 0.2334520  | C  | 1.4826912  | -6.1995828 | -3.4491973 |
| O | 0.4184224  | 1.4267348  | 0.9541571  | H  | 0.9480501  | -6.9857147 | -4.0220982 |
| O | 2.0405368  | 0.5768293  | -0.8148583 | H  | 0.4121008  | -4.7012471 | -0.4576634 |
| P | 0.4389919  | 0.8158292  | -0.5575480 | C  | 3.1688314  | -0.2858037 | -3.7956214 |
| O | 0.0268783  | 1.8845930  | -1.5863822 | H  | 5.8006471  | -1.1773054 | -3.7202246 |
| O | -0.3540051 | -0.4954066 | -0.5889928 | H  | 5.5890503  | -2.4680880 | -2.4890317 |
| C | 4.7285227  | 6.2195223  | 1.1718351  | C  | 2.8759270  | -2.1176518 | -2.0521032 |
| C | 5.4283995  | 4.9895045  | 1.0546535  | C  | -0.0069773 | -2.9670609 | 1.7678461  |
| H | 2.7888592  | 7.1702249  | 1.3170026  | C  | 1.7812467  | -3.0673186 | -0.0580144 |
| H | 5.2851016  | 7.1689250  | 1.1835835  | H  | 3.1935843  | -4.4115414 | 1.9268398  |
| H | 5.2919037  | 2.8389781  | 0.9450096  | H  | 1.6486400  | -5.2781033 | 1.6860152  |
| H | 6.5251604  | 4.9910770  | 0.9624794  | C  | 3.8476823  | -1.1453166 | -2.7171252 |
| C | 5.3213941  | 1.2127327  | 4.3402665  | C  | 2.6906737  | -2.1399438 | -0.6438807 |
| C | 5.9479283  | -0.0590810 | 4.2633887  | C  | 1.4920526  | -3.0982171 | 1.4445901  |
| H | 3.9444209  | 2.6041416  | 3.4383398  | H  | 2.2889567  | 0.2410550  | -3.3759546 |
| H | 5.5406612  | 1.8801399  | 5.1875720  | H  | -0.4408841 | -2.0738212 | 1.2784664  |
| H | 6.6611800  | -0.3685570 | 5.0423875  | H  | 2.8115151  | -0.8917886 | -4.6533754 |
| H | 6.0931815  | -1.9188875 | 3.1648880  | H  | -0.6843345 | -3.5523769 | -4.2302594 |
| C | -1.8025812 | 4.1912947  | -0.0028957 | H  | -0.5793151 | -3.8610111 | 1.4403710  |
| C | -1.0581522 | 3.8032363  | 1.1461652  | H  | 2.3617171  | -5.8798617 | -4.0476485 |
| C | -3.2068520 | 4.0953598  | 0.0447938  | H  | 4.2210529  | -0.4550035 | -1.9332301 |
| C | -1.7312418 | 3.3399468  | 2.3105788  | H  | 1.9858825  | -2.2169516 | 1.8995944  |
| C | -3.1332063 | 3.2635976  | 2.3002497  | H  | 2.3123437  | -3.0107124 | -3.9391439 |
| C | -3.8930542 | 3.6268485  | 1.1770991  | Zn | 0.3357181  | 2.0338797  | -3.4860520 |
| H | -3.7956733 | 4.3906749  | -0.8383920 | Br | 1.5763023  | 3.5384913  | -4.6598980 |
| C | -0.9786969 | 2.9449120  | 3.5806364  | C  | -3.7421535 | -7.4034805 | -1.9932546 |
| H | -3.6460647 | 2.8856613  | 3.1985257  | C  | -2.3668180 | -3.3817243 | -1.3006359 |
| C | -1.2231991 | 1.4777123  | 3.9745200  | C  | -3.8734044 | -6.4281922 | -2.9998952 |
| H | -2.2866586 | 1.2953900  | 4.2327773  | C  | -2.7322244 | -5.7481807 | -0.5266174 |
| H | -0.6097073 | 1.2092188  | 4.8597279  | C  | -2.8724446 | -4.7630923 | -1.5277480 |
| H | -0.9729578 | 0.7941729  | 3.1419963  | C  | -3.1670994 | -7.0622401 | -0.7587098 |
| C | -1.3095664 | 3.9085784  | 4.7357022  | C  | -3.4392892 | -5.1176128 | -2.7714543 |
| H | 0.1066944  | 3.0527599  | 3.3790794  | O  | -2.0153800 | -2.6894966 | -2.3329000 |
| H | -2.3833939 | 3.8552290  | 5.0122849  | H  | -4.0804021 | -8.4346546 | -2.1772973 |
| H | -1.0870331 | 4.9598890  | 4.4611909  | H  | -2.2471678 | -5.4888723 | 0.4283942  |
| H | -0.7182744 | 3.6557505  | 5.6403163  | H  | -4.3123001 | -6.6986213 | -3.9726388 |
| C | -5.4103398 | 3.4875338  | 1.1704458  | H  | -3.0451556 | -7.8260533 | 0.0243176  |
| C | -5.8313834 | 2.0058157  | 1.1758958  | H  | -3.5117715 | -4.3469726 | -3.5535105 |
| H | -6.9365548 | 1.9069230  | 1.1418498  | Br | -0.8406942 | 0.0444364  | -4.2981046 |
| H | -5.4684976 | 1.4925124  | 2.0902841  | Zn | -1.6070334 | -0.8046549 | -2.1002608 |
| H | -5.4071730 | 1.4656497  | 0.3063318  | H  | -3.7899079 | -3.9156792 | 1.1152789  |
| C | -6.0715109 | 4.2617896  | 2.3236261  | H  | -4.1232179 | -0.2705611 | -2.4429188 |
| H | -5.7709639 | 3.9348207  | 0.2174266  | C  | -4.1262260 | -2.4698240 | -0.5280113 |
| H | -7.1776282 | 4.2033431  | 2.2561207  | C  | -4.2510447 | -2.9275553 | 0.9065957  |
| H | -5.7807687 | 5.3314793  | 2.3107366  | H  | -4.7881528 | -2.8744959 | -1.3067322 |
| H | -5.7784519 | 3.8467480  | 3.3104454  | C  | -3.7359872 | -1.1140426 | -0.4864488 |
| C | -1.1324725 | 4.7239220  | -1.2693492 | C  | -3.5538190 | -0.1591851 | -1.5052499 |
| C | -1.7775705 | 4.1951691  | -2.5642365 | C  | -3.2938012 | -0.8314575 | 0.9270290  |
| H | -1.1340407 | 4.4327199  | -3.4377340 | O  | -3.5693111 | -1.9367084 | 1.6920366  |
| H | -2.7658111 | 4.6589294  | -2.7644794 | O  | -2.7941520 | 0.1758647  | 1.3728510  |
| H | -1.9410418 | 3.0983592  | -2.5160460 | H  | -5.3124831 | -2.9789024 | 1.2388857  |
| C | -1.1119280 | 6.2645457  | -1.2873698 | H  | -3.3468979 | 0.8744544  | -1.1692641 |
| H | -0.0810375 | 4.3717529  | -1.2609954 | H  | -1.8093826 | -3.2409595 | -0.3469819 |
| H | -0.5936860 | 6.6397976  | -2.1941308 |    |            |            |            |
| H | -0.5908405 | 6.6781192  | -0.4019719 |    |            |            |            |
| H | -2.1443334 | 6.6729110  | -1.2863602 |    |            |            |            |
| H | -0.2964563 | -5.3830789 | -2.5518306 |    |            |            |            |
| H | 4.7764501  | -2.6040496 | -4.0784088 |    |            |            |            |

## 7 Other Pathways

### 7.1 Complexes 10, 11, 14 and 15

#### 7.1.1 Educt Complexes 10

10a-ma

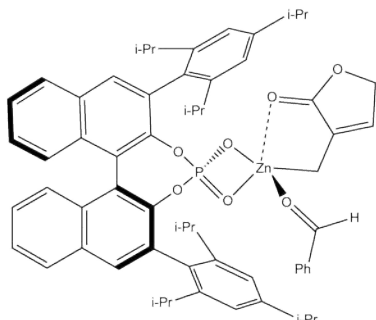

Energy (Hartree) = -5044.061266611

|   |            |            |             |
|---|------------|------------|-------------|
| C | 0.0820768  | 1.0839813  | 269.2506785 |
| C | 0.9642521  | 0.1331794  | 269.7703697 |
| C | 0.5641854  | -0.5896974 | 270.9527336 |
| C | 1.4354248  | -1.4738467 | 271.6575587 |
| C | -0.7695490 | -0.3898014 | 271.4699044 |
| C | -1.1883705 | -1.1273271 | 272.6176231 |
| C | -1.6273468 | 0.5716419  | 270.8614013 |
| H | -2.6335279 | 0.7231727  | 271.2807849 |
| C | -1.2124934 | 1.3569371  | 269.7922895 |
| C | 4.4959879  | 0.9133484  | 268.4875409 |
| C | 4.9533697  | -0.3579484 | 268.1612288 |
| H | 6.0032679  | -0.4862222 | 267.8551192 |
| C | 4.1044459  | -1.4999849 | 268.2097599 |
| C | 4.5641080  | -2.7846899 | 267.7923969 |
| C | 2.7509042  | -1.3557517 | 268.6883229 |
| C | 1.9045925  | -2.5056367 | 268.6748412 |
| C | 2.2939019  | -0.0591334 | 269.1246654 |
| C | 3.1419813  | 1.0410135  | 268.9272663 |
| O | 0.4588462  | 1.7812805  | 268.1183924 |
| O | 2.6973246  | 2.3185016  | 269.2375941 |
| P | 1.5427265  | 3.0181604  | 268.2622113 |
| O | 0.9785588  | 4.1871172  | 269.1080839 |
| O | 1.9751505  | 3.4197730  | 266.8664420 |
| C | -0.3261279 | -2.0029594 | 273.2596148 |
| C | 1.0013437  | -2.1631611 | 272.7814349 |
| H | -2.2116063 | -0.9723329 | 272.9948712 |
| H | -0.6618666 | -2.5604988 | 274.1472917 |
| H | 2.4675696  | -1.6014340 | 271.3030885 |
| H | 1.6949480  | -2.8360129 | 273.3086664 |
| C | 2.3774906  | -3.7380872 | 268.2468679 |
| C | 3.7219401  | -3.8857756 | 267.8133537 |
| H | 0.8594133  | -2.4020634 | 268.9980841 |
| H | 1.7016445  | -4.6068959 | 268.2378174 |
| H | 4.0875283  | -4.8696915 | 267.4820410 |
| H | 5.6029705  | -2.8805622 | 267.4391209 |
| C | -2.2034570 | 3.6683663  | 270.0342352 |
| C | -2.0338801 | 2.4874194  | 269.2514793 |
| C | -2.9721201 | 4.7197229  | 269.5069829 |
| C | -2.6087236 | 2.4105089  | 267.9556893 |
| C | -3.3842844 | 3.4882489  | 267.4838504 |
| C | -3.5866034 | 4.6508904  | 268.2435670 |
| H | -3.0898873 | 5.6400953  | 270.1014263 |
| C | -2.4273473 | 1.1911924  | 267.0543061 |
| H | -3.8368046 | 3.4075268  | 266.4845062 |
| C | -1.7422027 | 1.5643849  | 265.7265838 |

|   |            |            |             |
|---|------------|------------|-------------|
| H | -2.3764539 | 2.2425896  | 265.1176897 |
| H | -1.5505155 | 0.6561475  | 265.1184661 |
| H | -0.7718584 | 2.0665584  | 265.9072663 |
| C | -3.7640663 | 0.4632984  | 266.8214220 |
| H | -1.7601627 | 0.4783770  | 267.5796094 |
| H | -4.4906818 | 1.1091098  | 266.2850370 |
| H | -4.2301862 | 0.1609425  | 267.7811694 |
| H | -3.6133861 | -0.4498586 | 266.2089420 |
| C | -4.4602568 | 5.8105399  | 267.7723035 |
| C | -4.6921631 | 5.8488423  | 266.2570900 |
| H | -5.2180384 | 6.7818586  | 265.9680539 |
| H | -5.3263991 | 5.0021349  | 265.9208787 |
| H | -3.7381327 | 5.8044259  | 265.6953059 |
| C | -5.8031545 | 5.8128207  | 268.5303425 |
| H | -3.9205832 | 6.7429428  | 268.0564795 |
| H | -6.4216243 | 6.6903590  | 268.2475685 |
| H | -5.6500442 | 5.8387222  | 269.6275908 |
| H | -6.3821919 | 4.8952876  | 268.2956089 |
| C | -1.5882672 | 3.8255346  | 271.4254289 |
| C | -0.8850156 | 5.1782302  | 271.6274783 |
| H | -0.3727185 | 5.1931116  | 272.6118909 |
| H | -1.5980320 | 6.0284185  | 271.6189867 |
| H | -0.1359561 | 5.3533077  | 270.8347862 |
| C | -2.6506616 | 3.5965049  | 272.5184256 |
| H | -0.8127980 | 3.0404193  | 271.5346669 |
| H | -2.1977661 | 3.6641075  | 273.5295450 |
| H | -3.1355482 | 2.6041060  | 272.4275531 |
| H | -3.4516542 | 4.3629250  | 272.4539664 |
| H | 7.9591996  | 6.1899340  | 268.1900526 |
| H | 7.7405901  | 2.0186818  | 272.0546434 |
| H | 5.2057044  | 1.2878478  | 264.2163171 |
| C | 8.4756220  | 5.2301345  | 268.4263435 |
| H | 4.6900882  | 2.0544438  | 272.8400300 |
| H | 9.9725759  | 6.2555165  | 269.6394593 |
| H | 3.9061286  | 3.5006754  | 264.3442805 |
| C | 7.3857477  | 4.1580070  | 268.4908849 |
| C | 7.0921794  | 1.1837957  | 271.7154228 |
| C | 9.2401335  | 5.4290972  | 269.7401654 |
| H | 9.8059372  | 4.5151365  | 270.0181264 |
| C | 7.1060985  | 3.4212348  | 269.6532541 |
| C | 5.7472032  | 1.5400662  | 265.1516149 |
| H | 8.9713116  | 4.8596520  | 266.3002002 |
| C | 6.6217281  | 3.8707602  | 267.3429103 |
| C | 9.4720013  | 4.9465993  | 267.2841118 |
| H | 10.2250511 | 5.7580423  | 267.2073793 |
| H | 6.7950390  | 4.4582666  | 266.4285930 |
| C | 4.9781426  | 2.5890759  | 271.9110656 |
| H | 6.8178026  | 0.5980409  | 272.6167580 |
| H | 7.7004642  | 0.5333395  | 271.0550068 |
| C | 6.1334586  | 2.4012118  | 269.6792559 |
| C | 4.5659780  | 3.7810157  | 265.1895036 |
| C | 5.6589312  | 2.8473655  | 267.3066798 |
| H | 5.9430488  | 0.5941204  | 265.6941083 |
| H | 6.7290464  | 1.9774723  | 264.8718913 |
| C | 5.8306082  | 1.6874233  | 270.9960365 |
| C | 5.4299528  | 2.0878990  | 268.4872778 |
| C | 4.9290035  | 2.5299551  | 266.0035018 |
| H | 4.0494840  | 2.9100313  | 271.3978981 |
| H | 4.0117622  | 4.5105099  | 265.8095755 |
| H | 5.5454886  | 3.4972462  | 272.2087485 |
| H | 8.5682166  | 5.6805466  | 270.5829457 |
| H | 5.4618987  | 4.2757316  | 264.7578898 |
| H | 10.0128999 | 3.9947392  | 267.4679192 |
| H | 5.2168491  | 0.7948518  | 270.7573972 |
| H | 3.9702572  | 2.0427380  | 266.2735400 |
| H | 7.6602719  | 3.6349133  | 270.5780074 |
| C | 6.2009409  | 8.5458506  | 268.9507891 |
| C | 5.0564264  | 7.8730580  | 268.5163748 |
| C | 4.5226642  | 6.8220528  | 269.2987039 |
| C | 5.1484469  | 6.4474949  | 270.5085552 |
| C | 6.2828935  | 7.1392294  | 270.9489707 |

|    |            |            |             |
|----|------------|------------|-------------|
| C  | 6.8081068  | 8.1845152  | 270.1704727 |
| H  | 6.6258978  | 9.3617005  | 268.3467614 |
| H  | 4.5493742  | 8.1396584  | 267.5769937 |
| C  | 3.2958909  | 6.1331724  | 268.9046940 |
| H  | 6.7641323  | 6.8609858  | 271.8983430 |
| H  | 7.7066825  | 8.7209112  | 270.5125481 |
| O  | 2.6274106  | 6.4428388  | 267.9037445 |
| H  | -2.0239905 | 10.2048655 | 266.7022920 |
| H  | -0.2926038 | 5.8958132  | 265.0959794 |
| Zn | 0.7760872  | 5.4960924  | 267.5409123 |
| C  | -1.9942134 | 8.1366794  | 265.9447177 |
| C  | -2.3906118 | 9.1814320  | 266.9426303 |
| H  | -2.3156779 | 8.1564243  | 264.8941082 |
| C  | -1.2441518 | 7.1842233  | 266.5590853 |
| C  | -0.6046356 | 5.9108481  | 266.1575999 |
| C  | -1.0710877 | 7.6479139  | 267.9660141 |
| O  | -1.7905896 | 8.7783802  | 268.1868534 |
| O  | -0.3521253 | 7.1414029  | 268.8236925 |
| H  | -3.4941610 | 9.2444627  | 267.0814270 |
| H  | -1.3293465 | 5.0755915  | 266.3029855 |
| H  | 4.7343667  | 5.6132275  | 271.0959475 |
| H  | 2.9444211  | 5.3019311  | 269.5654820 |

### 10a-mi

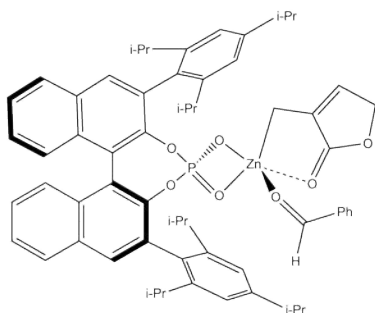

Energy (Hartree) = -5044.062939706

|   |            |            |             |
|---|------------|------------|-------------|
| C | 0.0378212  | 1.4727936  | 328.5015305 |
| C | 0.7219428  | 0.3138920  | 328.8904761 |
| C | 0.0582654  | -0.5938803 | 329.7995218 |
| C | 0.7056064  | -1.7233705 | 330.3873307 |
| C | -1.3140071 | -0.3372527 | 330.1683093 |
| C | -1.9962663 | -1.2575756 | 331.0190669 |
| C | -1.9337297 | 0.8763061  | 329.7559245 |
| H | -2.9515296 | 1.1023879  | 330.1101147 |
| C | -1.2591606 | 1.8198663  | 328.9928159 |
| C | 4.4729787  | 0.9960800  | 328.5149546 |
| C | 4.9307497  | -0.2400109 | 328.0714282 |
| H | 6.0133412  | -0.4006332 | 327.9581794 |
| C | 4.0415313  | -1.2946837 | 327.7174692 |
| C | 4.5268640  | -2.5181865 | 327.1657580 |
| C | 2.6202851  | -1.1171841 | 327.8917189 |
| C | 1.7477615  | -2.1541975 | 327.4447807 |
| C | 2.1388095  | 0.1074226  | 328.4796363 |
| C | 3.0634165  | 1.1355615  | 328.7062873 |
| O | 0.6148313  | 2.3432488  | 327.5854568 |
| O | 2.6043452  | 2.3664507  | 329.1621827 |
| P | 1.8978472  | 3.3000512  | 327.9871090 |
| O | 1.5307578  | 4.6593023  | 328.5778092 |
| O | 2.7996607  | 3.4357175  | 326.7403808 |
| C | -1.3490514 | -2.3702304 | 331.5331477 |
| C | 0.0200598  | -2.5891557 | 331.2282078 |
| H | -3.0467900 | -1.0510124 | 331.2778187 |
| H | -1.8850103 | -3.0689115 | 332.1934752 |
| H | 1.7673037  | -1.9047105 | 330.1744529 |
| H | 0.5474268  | -3.4498665 | 331.6672150 |
| C | 2.2512955  | -3.3240516 | 326.8934666 |

|   |            |            |             |
|---|------------|------------|-------------|
| C | 3.6527325  | -3.5170908 | 326.7650954 |
| H | 0.6617009  | -2.0110317 | 327.5348316 |
| H | 1.5579288  | -4.1062437 | 326.5485089 |
| H | 4.0408808  | -4.4523477 | 326.3336990 |
| H | 5.6145925  | -2.6457284 | 327.0482033 |
| C | -1.4374322 | 4.1759045  | 329.8165360 |
| C | -1.7776933 | 3.2148781  | 328.8191102 |
| C | -1.8878557 | 5.4938232  | 329.6546357 |
| C | -2.5753149 | 3.5850470  | 327.7111777 |
| C | -3.0295617 | 4.9184768  | 327.6139967 |
| C | -2.6833190 | 5.8946095  | 328.5647186 |
| H | -1.6137585 | 6.2481237  | 330.4082254 |
| C | -2.9142453 | 2.5720433  | 326.6197597 |
| H | -3.6856371 | 5.1878775  | 326.7726823 |
| C | -2.0441789 | 2.7944608  | 325.3672245 |
| H | -2.2770839 | 3.7672313  | 324.8855129 |
| H | -2.2248801 | 1.9986458  | 324.6149833 |
| H | -0.9667805 | 2.7878180  | 325.6248784 |
| C | -4.4102741 | 2.5499089  | 326.2673595 |
| H | -2.6560567 | 1.5692725  | 327.0213077 |
| H | -4.7382326 | 3.5003097  | 325.7959294 |
| H | -5.0377129 | 2.3878218  | 327.1669965 |
| H | -4.6279714 | 1.7373090  | 325.5441116 |
| C | -3.1035127 | 7.3604595  | 328.4695821 |
| C | -1.9033298 | 8.2588952  | 328.1016721 |
| H | -2.1753011 | 9.3312176  | 328.1885277 |
| H | -1.5821902 | 8.0835109  | 327.0546552 |
| H | -1.0173596 | 8.0730319  | 328.7399848 |
| C | -4.2912022 | 7.6173716  | 327.5340983 |
| H | -3.4227930 | 7.6512188  | 329.4962263 |
| H | -4.6123820 | 8.6765355  | 327.5980899 |
| H | -5.1625980 | 6.9789010  | 327.7840364 |
| H | -4.0252064 | 7.4281108  | 326.4725640 |
| C | -0.6539019 | 3.7849888  | 331.0711940 |
| C | 0.3186769  | 4.8695884  | 331.5571835 |
| H | 0.9444523  | 4.4683727  | 332.3810777 |
| H | -0.2098044 | 5.7619698  | 331.9526712 |
| H | 0.9786750  | 5.1886687  | 330.7298644 |
| C | -1.6210808 | 3.3773115  | 332.2006699 |
| H | -0.0401553 | 2.8947076  | 330.8191318 |
| H | -1.0587852 | 3.0562067  | 333.1020520 |
| H | -2.2832283 | 2.5426814  | 331.8987521 |
| H | -2.2674139 | 4.2336028  | 332.4864368 |
| H | 8.8231525  | 5.5230269  | 328.6070375 |
| H | 6.4911523  | 2.0432617  | 332.7489902 |
| H | 6.8472711  | 1.1248251  | 324.6645765 |
| C | 8.4356610  | 5.1874007  | 329.5944220 |
| H | 3.3510258  | 2.7324139  | 332.7791713 |
| H | 8.7130528  | 7.1781551  | 330.4713093 |
| H | 5.4174732  | 3.2489406  | 324.3286250 |
| C | 7.3465354  | 4.1591847  | 329.3113650 |
| C | 5.7517555  | 1.3445910  | 332.3042217 |
| C | 7.9053226  | 6.4312169  | 330.3275641 |
| H | 7.5158947  | 6.1726806  | 331.3348847 |
| C | 6.5685317  | 3.6084996  | 330.3441302 |
| C | 7.0397204  | 1.4132496  | 325.7187838 |
| H | 10.0176993 | 3.6738972  | 329.8113141 |
| C | 7.1049099  | 3.7061599  | 328.0049420 |
| C | 9.6086843  | 4.5461302  | 330.3595432 |
| H | 10.4308668 | 5.2756277  | 330.5134071 |
| H | 7.6854605  | 4.1505078  | 327.1804292 |
| C | 3.9920060  | 3.1623619  | 331.9816145 |
| H | 5.1644866  | 0.9054783  | 333.1372009 |
| H | 6.3176181  | 0.5264961  | 331.8141818 |
| C | 5.6075987  | 2.6085447  | 330.1106027 |
| C | 5.7656868  | 3.5570387  | 325.3351183 |
| C | 6.1465691  | 2.7173715  | 327.7098751 |
| H | 7.1336455  | 0.4827849  | 326.3120953 |
| H | 8.0217751  | 1.9302089  | 325.7548162 |
| C | 4.8263337  | 2.0597376  | 331.3031929 |
| C | 5.4137431  | 2.1318192  | 328.7825491 |

|    |            |           |             |
|----|------------|-----------|-------------|
| C  | 5.9187068  | 2.3274536 | 326.2485278 |
| H  | 3.3359936  | 3.6697146 | 331.2481202 |
| H  | 5.0214059  | 4.2657265 | 325.7465069 |
| H  | 4.6404333  | 3.9298493 | 332.4549438 |
| H  | 7.0855933  | 6.9169010 | 329.7617864 |
| H  | 6.7217019  | 4.1050528 | 325.2031428 |
| H  | 9.2831793  | 4.1892085 | 331.3592280 |
| H  | 4.1156577  | 1.2981017 | 330.9261157 |
| H  | 4.9596751  | 1.7739084 | 326.2015944 |
| H  | 6.7240959  | 3.9571495 | 331.3779378 |
| Zn | 3.1487472  | 5.4527311 | 327.1339646 |
| H  | 2.3765441  | 6.6708767 | 332.0807660 |
| H  | 4.6491217  | 7.4603761 | 327.4240351 |
| C  | 4.0073001  | 6.8929397 | 330.6380642 |
| C  | 2.8545877  | 7.4339245 | 331.4262619 |
| H  | 4.9109845  | 6.4686627 | 331.0955891 |
| C  | 3.7388849  | 7.0044092 | 329.3111348 |
| C  | 4.4619302  | 6.5916666 | 328.0907500 |
| C  | 2.3657484  | 7.5892226 | 329.2012916 |
| O  | 1.8881065  | 7.8611495 | 330.4567394 |
| O  | 1.7060252  | 7.7820428 | 328.1935071 |
| H  | 3.1289750  | 8.3022857 | 332.0680070 |
| H  | 5.4112643  | 6.0686488 | 328.3085988 |
| C  | -0.4244750 | 7.4213189 | 322.3201474 |
| C  | 0.4206948  | 7.0130442 | 323.3548850 |
| C  | -0.1333816 | 6.5525897 | 324.5731166 |
| C  | -1.5350110 | 6.5022823 | 324.7379093 |
| C  | -2.3780312 | 6.9088627 | 323.6964183 |
| C  | -1.8227786 | 7.3690885 | 322.4904168 |
| H  | -0.0003754 | 7.7834160 | 321.3714265 |
| H  | 1.5155466  | 7.0409520 | 323.2502522 |
| C  | 0.7269282  | 6.1081910 | 325.6696394 |
| H  | -1.9474743 | 6.1322066 | 325.6878658 |
| H  | -3.4704275 | 6.8670474 | 323.8238969 |
| H  | -2.4843369 | 7.6912852 | 321.6713053 |
| O  | 1.9642918  | 6.0561609 | 325.5603018 |
| H  | 0.2356627  | 5.8009706 | 326.6271045 |

### 10b-ma

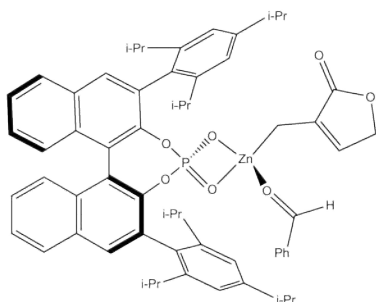

Energy (Hartree) = -5044.061955673

|   |            |            |             |
|---|------------|------------|-------------|
| C | 18.8512836 | 0.8822524  | 658.2018975 |
| C | 19.7321721 | -0.1868541 | 658.3961498 |
| C | 19.3608153 | -1.1953505 | 659.3584072 |
| C | 20.2504499 | -2.2299528 | 659.7758993 |
| C | 18.0460192 | -1.1417586 | 659.9523426 |
| C | 17.6619421 | -2.1538324 | 660.8822407 |
| C | 17.1648682 | -0.0705083 | 659.6247666 |
| H | 16.1571237 | -0.0605019 | 660.0663271 |
| C | 17.5543859 | 0.9746710  | 658.7959637 |
| C | 23.0439868 | 0.9002115  | 656.7671079 |
| C | 23.4154990 | -0.2604889 | 656.0999986 |
| H | 24.3508162 | -0.2683354 | 655.5190446 |
| C | 22.5844008 | -1.4161659 | 656.0854864 |
| C | 22.9428698 | -2.5692373 | 655.3247323 |
| C | 21.3275522 | -1.3989391 | 656.7964505 |
| C | 20.4545298 | -2.5179844 | 656.6381651 |
| C | 20.9910128 | -0.2456447 | 657.6001579 |

|   |            |            |             |
|---|------------|------------|-------------|
| C | 21.8466791 | 0.8620605  | 657.5444002 |
| O | 19.2254516 | 1.9179899  | 657.3540544 |
| O | 21.5765277 | 1.9885393  | 658.3059848 |
| P | 20.3146827 | 2.9890712  | 657.9772294 |
| O | 19.8810527 | 3.5674236  | 659.3480713 |
| O | 20.5411547 | 4.0852935  | 656.9369422 |
| C | 18.5422652 | -3.1612859 | 661.2464625 |
| C | 19.8519239 | -3.1877799 | 660.6979711 |
| H | 16.6521670 | -2.1077959 | 661.3197021 |
| H | 18.2344273 | -3.9305900 | 661.9709053 |
| H | 21.2686024 | -2.2555339 | 659.3630730 |
| H | 20.5596705 | -3.9709021 | 661.0099737 |
| C | 20.8247342 | -3.6164609 | 655.8748154 |
| C | 22.0868678 | -3.6548467 | 655.2257078 |
| H | 19.4694076 | -2.5022994 | 657.1233259 |
| H | 20.1286772 | -4.4624609 | 655.7677489 |
| H | 22.3733337 | -4.5352746 | 654.6305813 |
| H | 23.9112422 | -2.5695345 | 654.7998832 |
| C | 16.3889175 | 3.1042976  | 659.5319950 |
| C | 16.6812278 | 2.1582260  | 658.5079674 |
| C | 15.5528440 | 4.1954264  | 659.2249308 |
| C | 16.1606121 | 2.3522811  | 657.1967245 |
| C | 15.3385564 | 3.4646828  | 656.9457279 |
| C | 15.0148759 | 4.3990699  | 657.9440104 |
| H | 15.3200037 | 4.9291226  | 660.0130802 |
| C | 16.4423963 | 1.3820760  | 656.0505539 |
| H | 14.9329278 | 3.6013745  | 655.9304831 |
| C | 17.1360246 | 2.0823711  | 654.8674973 |
| H | 16.4720896 | 2.8352604  | 654.3927975 |
| H | 17.4111595 | 1.3445447  | 654.0856361 |
| H | 18.0599663 | 2.5944891  | 655.1997245 |
| C | 15.1589807 | 0.6539735  | 655.6102012 |
| H | 17.1381433 | 0.6041644  | 656.4238996 |
| H | 14.4062976 | 1.3642469  | 655.2084740 |
| H | 14.6907630 | 0.1156256  | 656.4590667 |
| H | 15.3803312 | -0.0860716 | 654.8133078 |
| C | 14.0912437 | 5.5777520  | 657.6590424 |
| C | 14.5713687 | 6.4355792  | 656.4752578 |
| H | 13.9040645 | 7.3096564  | 656.3283390 |
| H | 14.5700517 | 5.8574994  | 655.5274721 |
| H | 15.5996037 | 6.8159659  | 656.6380013 |
| C | 12.6419816 | 5.0994850  | 657.4498746 |
| H | 14.1049263 | 6.2223173  | 658.5656013 |
| H | 11.9560691 | 5.9591226  | 657.3004304 |
| H | 12.2810359 | 4.5160193  | 658.3205701 |
| H | 12.5647976 | 4.4466364  | 656.5551166 |
| C | 16.9512288 | 2.9776923  | 660.9481699 |
| C | 17.4834731 | 4.3108611  | 661.5014191 |
| H | 18.0312924 | 4.1421715  | 662.4504015 |
| H | 16.6688786 | 5.0334900  | 661.7152800 |
| H | 18.1842340 | 4.7851534  | 660.7884580 |
| C | 15.9054974 | 2.3855108  | 661.9130167 |
| H | 17.8139737 | 2.2831257  | 660.8982643 |
| H | 16.3312457 | 2.2650777  | 662.9307737 |
| H | 15.5430536 | 1.3942584  | 661.5771092 |
| H | 15.0208410 | 3.0519487  | 661.9912682 |
| H | 25.6642079 | 6.3468532  | 655.1011978 |
| H | 26.8289342 | 2.3363938  | 659.3556339 |
| H | 22.9384850 | 1.4834042  | 652.2360162 |
| C | 26.1657774 | 5.7875950  | 655.9225233 |
| H | 24.1727817 | 2.4371937  | 661.1206348 |
| H | 26.8098745 | 7.6708733  | 656.8283515 |
| H | 21.1022105 | 3.0959962  | 653.0461265 |
| C | 25.3067932 | 4.5586676  | 656.1966956 |
| C | 26.0900681 | 1.5091260  | 659.3086237 |
| C | 26.2807596 | 6.7408734  | 657.1203391 |
| H | 26.8571085 | 6.2873358  | 657.9534849 |
| C | 25.3272707 | 3.8894054  | 657.4317836 |
| C | 23.6139809 | 1.8506143  | 653.0362732 |
| H | 27.4784856 | 4.7163914  | 654.5158753 |
| C | 24.4907839 | 4.0303377  | 655.1816546 |

|    |            |            |             |
|----|------------|------------|-------------|
| C  | 27.5572020 | 5.3624304  | 655.4132825 |
| H  | 28.1753822 | 6.2464560  | 655.1511374 |
| H  | 24.4449011 | 4.5590830  | 654.2151621 |
| C  | 24.1742569 | 2.9671954  | 660.1458279 |
| H  | 26.1245578 | 0.9743746  | 660.2804258 |
| H  | 26.4238192 | 0.8071510  | 658.5177436 |
| C  | 24.5920257 | 2.7107646  | 657.6578904 |
| C  | 21.8247285 | 3.4993888  | 653.7856112 |
| C  | 23.7228729 | 2.8658084  | 655.3589010 |
| H  | 24.2702114 | 1.0105983  | 653.3414024 |
| H  | 24.2630121 | 2.6366605  | 652.5957952 |
| C  | 24.6716164 | 2.0361715  | 659.0248999 |
| C  | 23.8054234 | 2.1784582  | 656.6030721 |
| C  | 22.8068624 | 2.3982089  | 654.2267021 |
| H  | 23.1424101 | 3.3166763  | 659.9462586 |
| H  | 21.2551281 | 3.8880875  | 654.6532187 |
| H  | 24.8267785 | 3.8589294  | 660.2540971 |
| H  | 25.2826765 | 7.0235006  | 657.5087746 |
| H  | 22.3506994 | 4.3461261  | 653.2946204 |
| H  | 28.0983715 | 4.7858792  | 656.1925857 |
| H  | 23.9971831 | 1.1559143  | 659.0051217 |
| H  | 22.1900658 | 1.5650714  | 654.6197087 |
| H  | 25.9422891 | 4.2908265  | 658.2518313 |
| C  | 22.6821726 | 7.0848655  | 655.3620561 |
| C  | 22.2985305 | 6.7303361  | 656.6594812 |
| C  | 22.4935382 | 7.6508379  | 657.7163298 |
| C  | 23.0796383 | 8.9132127  | 657.4625378 |
| C  | 23.4534003 | 9.2609214  | 656.1611045 |
| C  | 23.2541995 | 8.3459649  | 655.1116871 |
| H  | 22.5393762 | 6.3634038  | 654.5448437 |
| H  | 21.8628838 | 5.7374564  | 656.8549150 |
| C  | 22.0536891 | 7.3480348  | 659.0767273 |
| H  | 23.8945511 | 10.2478672 | 655.9578634 |
| H  | 23.5506368 | 8.6186372  | 654.0867479 |
| O  | 21.3533571 | 6.3815138  | 659.4192510 |
| H  | 20.1030802 | 8.1399361  | 654.4006810 |
| H  | 17.3253330 | 6.0875587  | 657.9660610 |
| Zn | 19.6695048 | 5.4494984  | 658.6627138 |
| C  | 18.5225024 | 7.4132150  | 655.7258119 |
| C  | 19.2736017 | 8.5148086  | 655.0451549 |
| H  | 17.9811637 | 6.6220442  | 655.1885617 |
| C  | 18.6602616 | 7.5387191  | 657.0737550 |
| C  | 18.2091982 | 6.7097909  | 658.2042376 |
| C  | 19.5114445 | 8.7462023  | 657.3096632 |
| O  | 19.8451613 | 9.3002663  | 656.0963188 |
| O  | 19.9116808 | 9.2090675  | 658.3624409 |
| H  | 18.6319893 | 9.1719249  | 654.4143390 |
| H  | 18.0116783 | 7.3305654  | 659.1010326 |
| H  | 23.2077506 | 9.6266973  | 658.2910734 |
| H  | 22.3953735 | 8.0589392  | 659.8719283 |

### 10b-mi

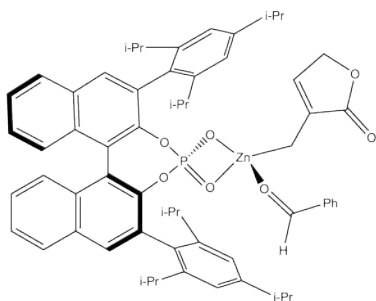

Energy (Hartree) = -5044.0638992

|   |            |            |             |
|---|------------|------------|-------------|
| C | 0.0643401  | 1.8630286  | 328.7603280 |
| C | 0.8641936  | 0.7647493  | 329.0942794 |
| C | 0.3309346  | -0.2172889 | 330.0050490 |
| C | 1.1231296  | -1.2709627 | 330.5517837 |
| C | -1.0515998 | -0.1215426 | 330.4040859 |
| C | -1.5905506 | -1.1014271 | 331.2902041 |

|   |            |            |             |
|---|------------|------------|-------------|
| C | -1.8501580 | 0.9446031  | 329.9009005 |
| H | -2.9225000 | 0.9681646  | 330.1481183 |
| C | -1.3179221 | 1.9567409  | 329.1099307 |
| C | 4.4702479  | 1.5377892  | 328.0138497 |
| C | 4.8146499  | 0.3471230  | 327.3843121 |
| H | 5.8388319  | 0.2280495  | 326.9984528 |
| C | 3.8792087  | -0.7073878 | 327.1920812 |
| C | 4.2306697  | -1.8857323 | 326.4680395 |
| C | 2.5395862  | -0.5654914 | 327.7071524 |
| C | 1.5934466  | -1.5931056 | 327.4092957 |
| C | 2.2056887  | 0.6153501  | 328.4680233 |
| C | 3.1524678  | 1.6422481  | 328.5548778 |
| O | 0.6071513  | 2.8824200  | 327.9858724 |
| O | 2.8434495  | 2.7961089  | 329.2621587 |
| P | 1.7145852  | 3.8723748  | 328.7300426 |
| O | 1.1465189  | 4.5956974  | 329.9677253 |
| O | 2.2145206  | 4.8735460  | 327.6809985 |
| C | -0.7976623 | -2.1228936 | 331.7905850 |
| C | 0.5729700  | -2.1982722 | 331.4254228 |
| H | -2.6502871 | -1.0217280 | 331.5796721 |
| H | -1.2239284 | -2.8680436 | 332.4794058 |
| H | 2.1865171  | -1.3337040 | 330.2808931 |
| H | 1.2063580  | -2.9958797 | 331.8428202 |
| C | 1.9616020  | -2.7188306 | 326.6858295 |
| C | 3.2946464  | -2.8782753 | 326.2229554 |
| H | 0.5553854  | -1.4826276 | 327.7514788 |
| H | 1.2101737  | -3.4923167 | 326.4649244 |
| H | 3.5764573  | -3.7795264 | 325.6574788 |
| H | 5.2615680  | -1.9819093 | 326.0923684 |
| C | -2.6129264 | 4.1255511  | 329.3690641 |
| C | -2.2000302 | 3.0358616  | 328.5568209 |
| C | -3.5421148 | 5.0441447  | 328.8415847 |
| C | -2.6808151 | 2.9134719  | 327.2227481 |
| C | -3.6064115 | 3.8592456  | 326.7451681 |
| C | -4.0633051 | 4.9259044  | 327.5420331 |
| H | -3.8728481 | 5.8889457  | 329.4661748 |
| C | -2.2095107 | 1.7947485  | 326.2947087 |
| H | -3.9872946 | 3.7540777  | 325.7163001 |
| C | -1.3071200 | 2.3504518  | 325.1768497 |
| H | -1.8726247 | 3.0334981  | 324.5077128 |
| H | -0.9050890 | 1.5277796  | 324.5500022 |
| H | -0.4492452 | 2.9104719  | 325.5987335 |
| C | -3.3795358 | 0.9730698  | 325.7275509 |
| H | -1.5906145 | 1.0986010  | 326.8961706 |
| H | -4.0339319 | 1.5833817  | 325.0706331 |
| H | -4.0114375 | 0.5586332  | 326.5389475 |
| H | -3.0014282 | 0.1256671  | 325.1193678 |
| C | -5.0951427 | 5.9180221  | 327.0162655 |
| C | -4.6029699 | 6.6664471  | 325.7644171 |
| H | -5.3564675 | 7.4055653  | 325.4226282 |
| H | -4.4206605 | 5.9680211  | 324.9203643 |
| H | -3.6585916 | 7.2137879  | 325.9599078 |
| C | -6.4482026 | 5.2302675  | 326.7574401 |
| H | -5.2503919 | 6.6744122  | 327.8168041 |
| H | -7.2140510 | 5.9664851  | 326.4366732 |
| H | -6.8195629 | 4.7197698  | 327.6684540 |
| H | -6.3621089 | 4.4652885  | 325.9575334 |
| C | -2.0827717 | 4.3028990  | 330.7908911 |
| C | -1.7399216 | 5.7637196  | 331.1264917 |
| H | -1.1943634 | 5.8130155  | 332.0901738 |
| H | -2.6476197 | 6.3949304  | 331.2290057 |
| H | -1.0996294 | 6.2088893  | 330.3429125 |
| C | -3.0662574 | 3.7282922  | 331.8282393 |
| H | -1.1336259 | 3.7325471  | 330.8550313 |
| H | -2.6638895 | 3.8460045  | 332.8556621 |
| H | -3.2599479 | 2.6504286  | 331.6632391 |
| H | -4.0423589 | 4.2560087  | 331.7821970 |
| H | 8.2630939  | 6.5400663  | 327.7996081 |
| H | 8.1227122  | 1.8789906  | 331.3108057 |
| H | 4.7063066  | 2.5225673  | 323.8052409 |
| C | 8.7173513  | 5.5676567  | 328.0983642 |

|    |            |           |             |
|----|------------|-----------|-------------|
| H  | 5.2211582  | 2.1181081 | 332.5021024 |
| H  | 10.2142911 | 6.5754598 | 329.3266181 |
| H  | 3.5871343  | 4.7360047 | 324.4329391 |
| C  | 7.5652047  | 4.5667302 | 328.1597917 |
| C  | 7.3437608  | 1.1675859 | 330.9653597 |
| C  | 9.4519271  | 5.7769709 | 329.4280087 |
| H  | 9.9833607  | 4.8562822 | 329.7484410 |
| C  | 7.3507354  | 3.7023988 | 329.2458368 |
| C  | 5.3714750  | 2.5908834 | 324.6911819 |
| H  | 9.2227733  | 5.0577066 | 326.0113527 |
| C  | 6.6706194  | 4.4897393 | 327.0743320 |
| C  | 9.7192362  | 5.1681473 | 326.9955974 |
| H  | 10.5198805 | 5.9295466 | 326.8908291 |
| H  | 6.7905615  | 5.2001553 | 326.2422950 |
| C  | 5.4459179  | 2.7416420 | 331.6117186 |
| H  | 7.1127990  | 0.4968275 | 331.8184552 |
| H  | 7.7860856  | 0.5533009 | 330.1549934 |
| C  | 6.3087553  | 2.7517859 | 329.2488098 |
| C  | 4.3586383  | 4.8479328 | 325.2217793 |
| C  | 5.6337347  | 3.5454800 | 327.0171661 |
| H  | 5.5677975  | 1.5605104 | 325.0469098 |
| H  | 6.3389474  | 3.0231783 | 324.3593983 |
| C  | 6.0747713  | 1.8929521 | 330.4889638 |
| C  | 5.4724642  | 2.6479797 | 328.1102853 |
| C  | 4.7327047  | 3.4693863 | 325.7849086 |
| H  | 4.5020438  | 3.2109655 | 331.2705992 |
| H  | 3.9448318  | 5.5053233 | 326.0077179 |
| H  | 6.1367488  | 3.5506807 | 331.9314865 |
| H  | 8.7659196  | 6.0695174 | 330.2481759 |
| H  | 5.2279927  | 5.3593470 | 324.7578420 |
| H  | 10.1988978 | 4.1969227 | 327.2390178 |
| H  | 5.3363209  | 1.1103735 | 330.2162429 |
| H  | 3.7859951  | 2.9821351 | 326.1003815 |
| H  | 8.0096649  | 3.7594854 | 330.1246846 |
| Zn | 1.4286532  | 6.4468969 | 328.9931077 |
| H  | 6.8576615  | 7.9372404 | 330.0433086 |
| H  | 2.0112375  | 8.9216837 | 328.9824251 |
| C  | 4.7364818  | 7.5217246 | 330.4297311 |
| C  | 6.0266063  | 7.2705442 | 329.7186059 |
| H  | 4.6163418  | 7.4243928 | 331.5177136 |
| C  | 3.7749299  | 7.8392287 | 329.5232140 |
| C  | 2.3273419  | 8.0899926 | 329.6453320 |
| C  | 4.4274265  | 7.8121093 | 328.1771024 |
| O  | 5.7574514  | 7.5123680 | 328.3319917 |
| O  | 3.9249487  | 8.0038270 | 327.0834981 |
| H  | 6.3767487  | 6.2177883 | 329.8224893 |
| H  | 2.0209472  | 8.3066325 | 330.6871006 |
| C  | 1.9586706  | 7.2844669 | 324.4143794 |
| C  | 1.2753291  | 7.0712016 | 325.6132023 |
| C  | 0.0009601  | 6.4568158 | 325.5991258 |
| C  | -0.5805264 | 6.0683471 | 324.3666146 |
| C  | 0.1107486  | 6.2772680 | 323.1690074 |
| C  | 1.3803020  | 6.8847965 | 323.1950179 |
| H  | 2.9541490  | 7.7504949 | 324.4499062 |
| H  | 1.7584888  | 7.3841489 | 326.5498141 |
| C  | -0.7576272 | 6.2050069 | 326.8196090 |
| H  | -1.5747269 | 5.5938135 | 324.3670798 |
| H  | -0.3346477 | 5.9673819 | 322.2118140 |
| H  | 1.9260392  | 7.0469292 | 322.2523165 |
| O  | -0.3766854 | 6.4156157 | 327.9837153 |
| H  | -1.7862240 | 5.7878672 | 326.6864582 |

Energy (Hartree) = -5044.067011913

|   |            |            |             |
|---|------------|------------|-------------|
| C | 0.0442649  | 1.2425993  | 328.5990363 |
| C | 0.8927361  | 0.2547926  | 329.1161096 |
| C | 0.4282150  | -0.5042208 | 330.2547588 |
| C | 1.2570125  | -1.4228976 | 330.9675637 |
| C | -0.9246024 | -0.3098340 | 330.7254753 |
| C | -1.4060174 | -1.0957430 | 331.8148549 |
| C | -1.7281068 | 0.7207178  | 330.1562984 |
| H | -2.7280936 | 0.9084230  | 330.5774837 |
| C | -1.2413712 | 1.5451822  | 329.1515942 |
| C | 4.4345341  | 1.1342088  | 327.9156448 |
| C | 4.9549881  | -0.1249285 | 327.6436228 |
| H | 6.0057536  | -0.2170741 | 327.3292961 |
| C | 4.1519828  | -1.3000825 | 327.7064151 |
| C | 4.6771388  | -2.5717720 | 327.3273098 |
| C | 2.7717675  | -1.2019910 | 328.1191416 |
| C | 1.9667312  | -2.3794542 | 328.0607912 |
| C | 2.2545490  | 0.0798224  | 328.5337900 |
| C | 3.0792711  | 1.2031108  | 328.3686965 |
| O | 0.4214657  | 1.9581652  | 327.4878322 |
| O | 2.5930018  | 2.4566361  | 328.6900565 |
| P | 1.5718427  | 3.1653424  | 327.5820091 |
| O | 1.0153670  | 4.3540079  | 328.4096058 |
| O | 2.1186640  | 3.3561964  | 326.2007730 |
| C | -0.5848092 | -2.0108915 | 332.4552281 |
| C | 0.7638274  | -2.1578014 | 332.0368665 |
| H | -2.4438095 | -0.9439035 | 332.1516160 |
| H | -0.9680777 | -2.6060228 | 333.2980558 |
| H | 2.3056661  | -1.5420786 | 330.6638105 |
| H | 1.4281670  | -2.8565883 | 332.5679451 |
| C | 2.5034578  | -3.5976901 | 327.6679265 |
| C | 3.8745278  | -3.7022535 | 327.3133318 |
| H | 0.9018074  | -2.3104167 | 328.3228591 |
| H | 1.8579964  | -4.4883741 | 327.6253363 |
| H | 4.2918374  | -4.6748930 | 327.0111549 |
| H | 5.7349976  | -2.6327046 | 327.0264256 |
| C | -1.8356807 | 3.9269178  | 329.6470520 |
| C | -1.8925514 | 2.8292726  | 328.7420239 |
| C | -2.3174632 | 5.1837074  | 329.2159921 |
| C | -2.4288442 | 3.0117969  | 327.4371988 |
| C | -2.9213770 | 4.2757609  | 327.0658844 |
| C | -2.8759781 | 5.3824962  | 327.9333271 |
| H | -2.3070144 | 6.0312174  | 329.9196467 |
| C | -2.5057477 | 1.8638605  | 326.4354768 |
| H | -3.3439972 | 4.4043559  | 326.0577392 |
| C | -1.7855469 | 2.1920263  | 325.1154466 |
| H | -2.2652286 | 3.0430288  | 324.5871386 |
| H | -1.8199783 | 1.3186844  | 324.4323241 |
| H | -0.7231415 | 2.4439053  | 325.2962876 |
| C | -3.9699794 | 1.4479103  | 326.1992541 |
| H | -1.9862727 | 0.9946017  | 326.8874607 |
| H | -4.5563683 | 2.2713730  | 325.7399165 |
| H | -4.4692602 | 1.1705848  | 327.1497070 |
| H | -4.0240203 | 0.5759020  | 325.5154153 |
| C | -3.4954041 | 6.7265794  | 327.5645948 |
| C | -2.9905282 | 7.2939719  | 326.2287476 |
| H | -3.4727610 | 8.2696171  | 326.0161396 |
| H | -3.2196130 | 6.6159266  | 325.3809373 |
| H | -1.8944120 | 7.4517114  | 326.2447101 |
| C | -5.0324132 | 6.6183312  | 327.5842007 |
| H | -3.1981712 | 7.4425724  | 328.3626092 |
| H | -5.5002736 | 7.6060650  | 327.3932936 |
| H | -5.3990354 | 6.2445057  | 328.5612038 |
| H | -5.3900499 | 5.9169517  | 326.8016021 |
| C | -1.2820243 | 3.8006929  | 331.0656111 |
| C | -0.2431490 | 4.8794603  | 331.4121210 |
| H | 0.1769667  | 4.6913382  | 332.4212990 |
| H | -0.6798746 | 5.9000936  | 331.4280423 |
| H | 0.5875500  | 4.8613132  | 330.6802957 |
| C | -2.4337930 | 3.7807587  | 332.0888222 |

### 10c-mi

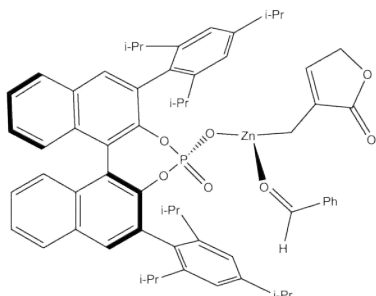



|    |            |           |             |
|----|------------|-----------|-------------|
| H  | -0.7593468 | 2.8269636 | 331.1323697 |
| H  | -2.0429602 | 3.6312049 | 333.1163211 |
| H  | -3.1562716 | 2.9674298 | 331.8753936 |
| H  | -2.9969974 | 4.7377293 | 332.0765903 |
| H  | 7.4598466  | 6.3091369 | 326.0441942 |
| H  | 7.2158758  | 3.2904501 | 331.1622232 |
| H  | 6.0497365  | 0.6484019 | 323.7093248 |
| C  | 7.5945296  | 6.0148577 | 327.1098887 |
| H  | 4.1160008  | 3.4876633 | 331.9971471 |
| H  | 7.8788329  | 8.0921879 | 327.7286993 |
| H  | 4.1614783  | 2.2916407 | 323.2285845 |
| C  | 6.7110330  | 4.7924513 | 327.3382364 |
| C  | 6.5388264  | 2.4164032 | 331.0611785 |
| C  | 7.2263479  | 7.2297208 | 327.9751727 |
| H  | 7.3675965  | 7.0195414 | 329.0561690 |
| C  | 6.3426484  | 4.3637970 | 328.6253693 |
| C  | 6.3537832  | 1.2577671 | 324.5857846 |
| H  | 9.3606716  | 4.7877659 | 326.6376227 |
| C  | 6.3002667  | 4.0062383 | 326.2490999 |
| C  | 9.0769038  | 5.6331079 | 327.2960379 |
| H  | 9.7436223  | 6.4909143 | 327.0684210 |
| H  | 6.5666394  | 4.3381418 | 325.2324841 |
| C  | 4.4324607  | 3.8494603 | 330.9968895 |
| H  | 6.2839874  | 2.0693450 | 332.0841722 |
| H  | 7.1080070  | 1.6097063 | 330.5564276 |
| C  | 5.6027157  | 3.1854532 | 328.8387569 |
| C  | 4.5071178  | 2.9202563 | 324.0754406 |
| C  | 5.5568837  | 2.8216032 | 326.4029984 |
| H  | 6.8015666  | 0.5759291 | 325.3364556 |
| H  | 7.1535407  | 1.9528888 | 324.2532600 |
| C  | 5.2668022  | 2.7776599 | 330.2724864 |
| C  | 5.2198275  | 2.3951938 | 327.7196110 |
| C  | 5.1518933  | 2.0357531 | 325.1555500 |
| H  | 3.5224281  | 4.0963553 | 330.4156334 |
| H  | 3.6336412  | 3.4561497 | 324.4905327 |
| H  | 5.0156455  | 4.7815709 | 331.1554799 |
| H  | 6.1761830  | 7.5522471 | 327.8283225 |
| H  | 5.2197952  | 3.6627445 | 323.6594780 |
| H  | 9.2701652  | 5.3192161 | 328.3433953 |
| H  | 4.6464056  | 1.8603766 | 330.2259450 |
| H  | 4.3819398  | 1.3003903 | 325.4636105 |
| H  | 6.6561211  | 4.9553998 | 329.5003651 |
| Zn | -0.0778316 | 5.9006999 | 327.9496062 |
| H  | 4.4020593  | 8.1179211 | 330.4887836 |
| H  | -0.1256008 | 8.5080958 | 328.1059052 |
| C  | 2.4359227  | 7.2509194 | 330.0280567 |
| C  | 3.8700522  | 7.5278427 | 329.7076241 |
| H  | 2.1212271  | 6.6637026 | 330.9011378 |
| C  | 1.6405309  | 7.7751606 | 329.0561120 |
| C  | 0.1891322  | 7.6977874 | 328.7923823 |
| C  | 2.5453283  | 8.4586597 | 328.0780296 |
| O  | 3.8542088  | 8.2826540 | 328.4907901 |
| O  | 2.2615436  | 9.0631327 | 327.0655596 |
| H  | 4.4552214  | 6.5936634 | 329.5412782 |
| H  | -0.4166277 | 7.7310262 | 329.7186933 |
| C  | 3.9629436  | 6.6293687 | 325.4473190 |
| C  | 2.6526320  | 6.2307750 | 325.7086743 |
| C  | 1.7768346  | 5.9307610 | 324.6395887 |
| C  | 2.2448882  | 6.0166870 | 323.3055260 |
| C  | 3.5571884  | 6.4224180 | 323.0456726 |
| C  | 4.4129623  | 6.7297346 | 324.1187319 |
| H  | 4.6369142  | 6.8577452 | 326.2833442 |
| H  | 2.3115911  | 6.1074441 | 326.7441621 |
| C  | 0.4016054  | 5.5100667 | 324.8543252 |
| H  | 1.5644139  | 5.7644320 | 322.4763912 |
| H  | 3.9202544  | 6.4927917 | 322.0096427 |
| H  | 5.4499053  | 7.0422353 | 323.9193846 |
| O  | -0.2360969 | 5.5001978 | 325.9223710 |
| H  | -0.1457835 | 5.1744694 | 323.9352986 |

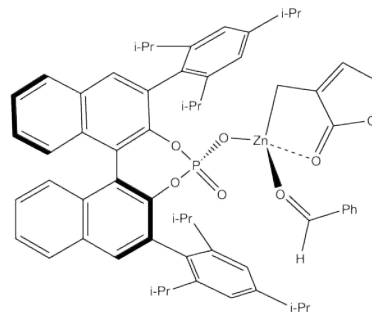

Energy (Hartree) = -5044.063471316

|   |            |            |             |
|---|------------|------------|-------------|
| C | 0.0931464  | 2.0534540  | 329.0586586 |
| C | 0.7803868  | 0.8829917  | 329.4107414 |
| C | 0.1564176  | -0.0131515 | 330.3543068 |
| C | 0.8366816  | -1.1338953 | 330.9200641 |
| C | -1.1997492 | 0.2428273  | 330.7761464 |
| C | -1.8286307 | -0.6547345 | 331.6897497 |
| C | -1.8814346 | 1.3910349  | 330.2813650 |
| H | -2.9337729 | 1.5481869  | 330.5639106 |
| C | -1.2548206 | 2.3184330  | 329.4585493 |
| C | 4.4758365  | 1.3488914  | 328.4744357 |
| C | 4.7737071  | 0.1174650  | 327.9033578 |
| H | 5.8026553  | -0.0857908 | 327.5687857 |
| C | 3.7739742  | -0.8765906 | 327.6955660 |
| C | 4.0804083  | -2.1020507 | 327.0315552 |
| C | 2.4187873  | -0.6317646 | 328.1317821 |
| C | 1.4244790  | -1.6086404 | 327.8238861 |
| C | 2.1221406  | 0.5970485  | 328.8270300 |
| C | 3.1369218  | 1.5539594  | 328.9294062 |
| O | 0.6891970  | 2.9727801  | 328.2142945 |
| O | 2.8615142  | 2.7507454  | 329.5569776 |
| P | 1.9662520  | 3.8980964  | 328.7624074 |
| O | 1.4853647  | 4.8035090  | 329.9316009 |
| O | 2.6117840  | 4.5519250  | 327.5725896 |
| C | -1.1464584 | -1.7482168 | 332.2007206 |
| C | 0.2024127  | -1.9781453 | 331.8206308 |
| H | -2.8677444 | -0.4510218 | 331.9931692 |
| H | -1.6414984 | -2.4286938 | 332.9102295 |
| H | 1.8836788  | -1.3182483 | 330.6421213 |
| H | 0.7530498  | -2.8302223 | 332.2478429 |
| C | 1.7535364  | -2.7830166 | 327.1612284 |
| C | 3.0946357  | -3.0421270 | 326.7727571 |
| H | 0.3814007  | -1.4169206 | 328.1115876 |
| H | 0.9660386  | -3.5168437 | 326.9306337 |
| H | 3.3454435  | -3.9799915 | 326.2540717 |
| H | 5.1199633  | -2.2793929 | 326.7133644 |
| C | -2.1137297 | 4.7010291  | 329.6877997 |
| C | -1.9885582 | 3.5111866  | 328.9194235 |
| C | -2.8554324 | 5.7722159  | 329.1506260 |
| C | -2.5821710 | 3.4281627  | 327.6286234 |
| C | -3.3059088 | 4.5316534  | 327.1384100 |
| C | -3.4686619 | 5.7102720  | 327.8883846 |
| H | -2.9697986 | 6.6931658  | 329.7434502 |
| C | -2.4462587 | 2.1732886  | 326.7654328 |
| H | -3.7683230 | 4.4613621  | 326.1405663 |
| C | -1.4727113 | 2.3970760  | 325.5926708 |
| H | -1.8550329 | 3.1772295  | 324.8998055 |
| H | -1.3449486 | 1.4648701  | 325.0044065 |
| H | -0.4739160 | 2.7087567  | 325.9572369 |
| C | -3.8078016 | 1.6496350  | 326.2776690 |
| H | -2.0060002 | 1.3803709  | 327.4038087 |
| H | -4.3007904 | 2.3596769  | 325.5810234 |
| H | -4.5006963 | 1.4767501  | 327.1258178 |
| H | -3.6835106 | 0.6904895  | 325.7340272 |
| C | -4.3111437 | 6.8732943  | 327.3756887 |
| C | -3.7462096 | 7.4894445  | 326.0848811 |

10d-mi

|    |            |           |             |
|----|------------|-----------|-------------|
| H  | -4.3621154 | 8.3529317 | 325.7582915 |
| H  | -3.7379322 | 6.7530629 | 325.2545372 |
| H  | -2.7050928 | 7.8420263 | 326.2233668 |
| C  | -5.7831667 | 6.4579202 | 327.1984001 |
| H  | -4.2786815 | 7.6598694 | 328.1615914 |
| H  | -6.4063982 | 7.3247577 | 326.8953146 |
| H  | -6.2008579 | 6.0433024 | 328.1377132 |
| H  | -5.8886387 | 5.6797036 | 326.4136710 |
| C  | -1.4961462 | 4.8243414 | 331.0797171 |
| C  | -0.9890766 | 6.2399037 | 331.3955759 |
| H  | -0.3544094 | 6.2343800 | 332.3027794 |
| H  | -1.8215878 | 6.9513316 | 331.5794860 |
| H  | -0.3698853 | 6.6465656 | 330.5737600 |
| C  | -2.4847000 | 4.3611068 | 332.1677544 |
| H  | -0.6133937 | 4.1532225 | 331.1018924 |
| H  | -2.0235794 | 4.4467954 | 333.1734111 |
| H  | -2.7938134 | 3.3075219 | 332.0265480 |
| H  | -3.4017918 | 4.9872767 | 332.1585738 |
| H  | 8.5628882  | 6.0779335 | 327.9161688 |
| H  | 7.4589384  | 2.0890191 | 332.1781497 |
| H  | 6.0188713  | 1.7548034 | 324.2088527 |
| C  | 8.5708778  | 5.5268317 | 328.8826614 |
| H  | 4.4336841  | 2.6740672 | 333.0104813 |
| H  | 9.1743999  | 7.3390165 | 329.9537255 |
| H  | 4.4521082  | 3.7692346 | 324.3200302 |
| C  | 7.4489218  | 4.4970425 | 328.8066380 |
| C  | 6.6445117  | 1.4051759 | 331.8590694 |
| C  | 8.3842367  | 6.5620370 | 330.0025064 |
| H  | 8.4572587  | 6.0906918 | 331.0058060 |
| C  | 6.9558038  | 3.8447150 | 329.9502119 |
| C  | 6.4318728  | 2.0238166 | 325.2033096 |
| H  | 10.0960590 | 4.1125838 | 328.1648695 |
| C  | 6.9144226  | 4.1249537 | 327.5626479 |
| C  | 9.9362275  | 4.8216124 | 329.0017114 |
| H  | 10.7692823 | 5.5554183 | 328.9986703 |
| H  | 7.2730159  | 4.6452704 | 326.6595049 |
| C  | 4.8390998  | 3.1857255 | 332.1128954 |
| H  | 6.2737127  | 0.8812902 | 332.7645986 |
| H  | 7.0902528  | 0.6481879 | 331.1824534 |
| C  | 5.9810744  | 2.8331793 | 329.8731457 |
| C  | 4.9048771  | 4.0560361 | 325.2920407 |
| C  | 5.9363550  | 3.1222283 | 327.4274177 |
| H  | 6.7476524  | 1.0874631 | 325.7065487 |
| H  | 7.3447018  | 2.6336414 | 325.0357125 |
| C  | 5.5036727  | 2.1708967 | 331.1646481 |
| C  | 5.4857178  | 2.4479064 | 328.5966319 |
| C  | 5.3937836  | 2.8002275 | 326.0351171 |
| H  | 4.0034917  | 3.7090150 | 331.6087934 |
| H  | 4.1384801  | 4.5811048 | 325.8932688 |
| H  | 5.5645522  | 3.9508979 | 332.4611836 |
| H  | 7.3989049  | 7.0643126 | 329.9313957 |
| H  | 5.7359629  | 4.7580660 | 325.0700509 |
| H  | 9.9962420  | 4.2409107 | 329.9463157 |
| H  | 4.7317951  | 1.4220261 | 330.8957957 |
| H  | 4.5091802  | 2.1452247 | 326.1679265 |
| H  | 7.3471603  | 4.1242003 | 330.9413571 |
| Zn | 2.4646053  | 6.5214121 | 329.8843079 |
| H  | 4.9876116  | 6.1000685 | 334.5751872 |
| H  | 4.5480717  | 7.9961120 | 329.7405448 |
| C  | 5.4843000  | 6.8857091 | 332.5883281 |
| C  | 4.9035585  | 7.0254093 | 333.9616864 |
| H  | 6.5469265  | 6.6836690 | 332.3984979 |
| C  | 4.5008523  | 7.0470127 | 331.6632090 |
| C  | 4.3950750  | 6.9879365 | 330.1859836 |
| C  | 3.2483296  | 7.2569720 | 332.4411991 |
| O  | 3.5003179  | 7.2914797 | 333.7664222 |
| O  | 2.1069615  | 7.3326731 | 331.9764907 |
| H  | 5.3475954  | 7.8600736 | 334.5488280 |
| H  | 5.1267576  | 6.2937508 | 329.7294483 |
| C  | 0.0841381  | 8.5999731 | 324.4728632 |
| C  | 0.4473773  | 8.3372783 | 325.7962657 |

|   |            |           |             |
|---|------------|-----------|-------------|
| C | 0.1666993  | 7.0698571 | 326.3577231 |
| C | -0.4604892 | 6.0688303 | 325.5828636 |
| C | -0.8007315 | 6.3310148 | 324.2510507 |
| C | -0.5351569 | 7.5960934 | 323.7003763 |
| H | 0.2872807  | 9.5863892 | 324.0291616 |
| H | 0.9465570  | 9.0941860 | 326.4196196 |
| C | 0.5549810  | 6.7296509 | 327.7222151 |
| H | -0.6662955 | 5.0883204 | 326.0364775 |
| H | -1.2802151 | 5.5496967 | 323.6423480 |
| H | -0.8115661 | 7.8066600 | 322.6555342 |
| O | 1.2692862  | 7.4541521 | 328.4427902 |
| H | 0.1628678  | 5.7619948 | 328.1158875 |

### 10f-ma

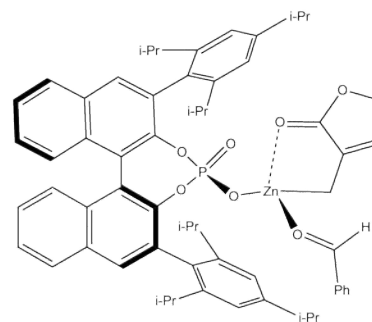

Energy (Hartree) = -5044.061368405

|   |            |            |             |
|---|------------|------------|-------------|
| C | -0.1816834 | 1.0035583  | 269.4705758 |
| C | 0.7168836  | 0.0696028  | 270.0026138 |
| C | 0.3685932  | -0.5658028 | 271.2528752 |
| C | 1.2769195  | -1.3880877 | 271.9858035 |
| C | -0.9430870 | -0.3398878 | 271.8130868 |
| C | -1.3096380 | -1.0020465 | 273.0229540 |
| C | -1.8265599 | 0.5854032  | 271.1863537 |
| H | -2.8115148 | 0.7706326  | 271.6422213 |
| C | -1.4491145 | 1.3105865  | 270.0635437 |
| C | 4.1079377  | 0.6639734  | 268.2915046 |
| C | 4.5595227  | -0.6402859 | 268.1248788 |
| H | 5.5564076  | -0.8113705 | 267.6895140 |
| C | 3.7426750  | -1.7645568 | 268.4335354 |
| C | 4.1842572  | -3.0938903 | 268.1597123 |
| C | 2.4241280  | -1.5563206 | 268.9834065 |
| C | 1.5835704  | -2.6972008 | 269.1592676 |
| C | 1.9997272  | -0.2124648 | 269.2980873 |
| C | 2.8270611  | 0.8497457  | 268.9019974 |
| O | 0.1147331  | 1.6367394  | 268.2823309 |
| O | 2.4358524  | 2.1466448  | 269.1515545 |
| P | 1.2440020  | 2.8474787  | 268.2158051 |
| O | 0.7932042  | 4.0376018  | 269.1148408 |
| O | 1.6039247  | 3.0888539  | 266.7782917 |
| C | -0.4138587 | -1.8246483 | 273.6887184 |
| C | 0.8965143  | -2.0014223 | 273.1715809 |
| H | -2.3188094 | -0.8286919 | 273.4292855 |
| H | -0.7085037 | -2.3235016 | 274.6246594 |
| H | 2.2974816  | -1.5271288 | 271.6039373 |
| H | 1.6207223  | -2.6254454 | 273.7173818 |
| C | 2.0354794  | -3.9757122 | 268.8633615 |
| C | 3.3533242  | -4.1822744 | 268.3760452 |
| H | 0.5580914  | -2.5526615 | 269.5258687 |
| H | 1.3625735  | -4.8357841 | 269.0021659 |
| H | 3.7043414  | -5.2014561 | 268.1532049 |
| H | 5.1978250  | -3.2352392 | 267.7520914 |
| C | -2.3565429 | 3.6479236  | 270.2906442 |
| C | -2.2400998 | 2.4569268  | 269.5185673 |
| C | -2.9872789 | 4.7671688  | 269.7127930 |
| C | -2.7784711 | 2.4080171  | 268.2019819 |

|   |            |            |             |    |            |            |             |
|---|------------|------------|-------------|----|------------|------------|-------------|
| C | -3.4016071 | 3.5518899  | 267.6777398 | H  | 6.6703373  | 4.5678965  | 268.8559783 |
| C | -3.5023752 | 4.7487921  | 268.4069716 | C  | -2.1476678 | 9.5941677  | 271.9798230 |
| H | -3.0717412 | 5.6971360  | 270.2999893 | C  | -1.2865857 | 8.7554034  | 271.2679106 |
| C | -2.7334762 | 1.1390243  | 267.3539243 | C  | -1.5193937 | 8.5156129  | 269.8923752 |
| H | -3.8110438 | 3.5089206  | 266.6561566 | C  | -2.6125559 | 9.1319318  | 269.2401666 |
| C | -2.1065926 | 1.3780794  | 265.9691442 | C  | -3.4707204 | 9.9735125  | 269.9583418 |
| H | -2.7370774 | 2.0431104  | 265.3421953 | C  | -3.2392580 | 10.2001682 | 271.3263460 |
| H | -2.0004503 | 0.4178764  | 265.4232281 | H  | -1.9763614 | 9.7803013  | 273.0507147 |
| H | -1.1028608 | 1.8364207  | 266.0596044 | H  | -0.4279041 | 8.2656538  | 271.7504260 |
| C | -4.1382283 | 0.5160448  | 267.2426173 | C  | -0.6545428 | 7.6185335  | 269.1282909 |
| H | -2.0953440 | 0.4025175  | 267.8821348 | H  | -4.3241411 | 10.4520333 | 269.4553981 |
| H | -4.8417573 | 1.2002672  | 266.7230453 | H  | -3.9170901 | 10.8574866 | 271.8926331 |
| H | -4.5626568 | 0.2970684  | 268.2435500 | O  | 0.3406295  | 7.0550460  | 269.6172416 |
| H | -4.1045443 | -0.4328356 | 266.6676987 | H  | 2.3268671  | 5.8980798  | 262.9284850 |
| C | -4.1485888 | 5.9873540  | 267.8015066 | H  | 3.2933866  | 7.3221340  | 267.5434004 |
| C | -3.4933031 | 6.3840807  | 266.4654064 | Zn | 1.4969193  | 5.7419885  | 268.4918330 |
| H | -3.8660005 | 7.3710025  | 266.1174952 | C  | 3.2372421  | 5.5033703  | 264.8908541 |
| H | -3.7331319 | 5.6499262  | 265.6682919 | C  | 2.1861989  | 5.2885804  | 263.8483509 |
| H | -2.3868484 | 6.4220418  | 266.5355799 | H  | 4.3017971  | 5.2865960  | 264.7314752 |
| C | -5.6708319 | 5.8156658  | 267.6497229 | C  | 2.6497609  | 5.9265881  | 266.0398613 |
| H | -3.9814577 | 6.8156705  | 268.5254355 | C  | 3.1134019  | 6.2316762  | 267.4175765 |
| H | -6.1400581 | 6.7380994  | 267.2474911 | C  | 1.1926701  | 5.9731582  | 265.7524039 |
| H | -6.1481537 | 5.5798143  | 268.6220641 | O  | 0.9400949  | 5.6685694  | 264.4679626 |
| H | -5.9075478 | 4.9862036  | 266.9509762 | O  | 0.2940039  | 6.2134844  | 266.5700589 |
| C | -1.8245495 | 3.7592595  | 271.7198382 | H  | 2.0948816  | 4.2216105  | 263.5476105 |
| C | -0.9070428 | 4.9739023  | 271.9269572 | H  | 4.0430217  | 5.6884689  | 267.6716088 |
| H | -0.4825541 | 4.9645767  | 272.9524412 | H  | -2.7806744 | 8.9405705  | 268.1685217 |
| H | -1.4563786 | 5.9313151  | 271.8103071 | H  | -0.9175230 | 7.4450921  | 268.0565188 |
| H | -0.0730136 | 4.9574432  | 271.2010121 |    |            |            |             |
| C | -2.9845771 | 3.7572093  | 272.7331124 |    |            |            |             |
| H | -1.2067384 | 2.8620372  | 271.9184594 |    |            |            |             |
| H | -2.6011358 | 3.7830597  | 273.7745452 |    |            |            |             |
| H | -3.6217879 | 2.8560944  | 272.6245096 |    |            |            |             |
| H | -3.6400504 | 4.6425816  | 272.5912396 |    |            |            |             |
| H | 7.2530395  | 5.0759271  | 265.1241752 |    |            |            |             |
| H | 7.3308084  | 3.2700814  | 270.7497504 |    |            |            |             |
| H | 5.0057863  | -0.4871179 | 263.8974834 |    |            |            |             |
| C | 7.3578673  | 5.0954219  | 266.2324199 |    |            |            |             |
| H | 4.3925065  | 3.8235567  | 271.8497518 |    |            |            |             |
| H | 7.5819335  | 7.2759368  | 266.2469705 |    |            |            |             |
| H | 3.0036705  | 1.1082206  | 263.7075856 |    |            |            |             |
| C | 6.4614841  | 3.9887601  | 266.7769476 |    |            |            |             |
| C | 6.6193475  | 2.4308055  | 270.8983150 |    |            |            |             |
| C | 6.9436386  | 6.4967525  | 266.7122798 |    |            |            |             |
| H | 7.0518084  | 6.5972593  | 267.8124456 |    |            |            |             |
| C | 6.2263022  | 3.8423241  | 268.1556051 |    |            |            |             |
| C | 5.4921781  | 0.2154662  | 264.6056137 |    |            |            |             |
| H | 9.1483368  | 3.8179968  | 266.1758573 |    |            |            |             |
| C | 5.8729812  | 3.0506355  | 265.9147865 |    |            |            |             |
| C | 8.8358575  | 4.8096040  | 266.5601637 |    |            |            |             |
| H | 9.5007920  | 5.5795346  | 266.1159412 |    |            |            |             |
| H | 6.0359130  | 3.1578505  | 264.8290414 |    |            |            |             |
| C | 4.5708740  | 3.9399812  | 270.7607105 |    |            |            |             |
| H | 6.4714071  | 2.3074561  | 271.9913132 |    |            |            |             |
| H | 7.1019469  | 1.5105922  | 270.5111115 |    |            |            |             |
| C | 5.4552309  | 2.7886407  | 268.6784720 |    |            |            |             |
| C | 3.5201204  | 1.8152572  | 264.3899213 |    |            |            |             |
| C | 5.0831539  | 1.9826631  | 266.3820124 |    |            |            |             |
| H | 6.1166480  | -0.3798837 | 265.3025620 |    |            |            |             |
| H | 6.1770108  | 0.8627599  | 264.0180855 |    |            |            |             |
| C | 5.2764589  | 2.6948576  | 270.1925095 |    |            |            |             |
| C | 4.8942533  | 1.8332114  | 267.7853503 |    |            |            |             |
| C | 4.4387625  | 1.0480253  | 265.3576095 |    |            |            |             |
| H | 3.5904042  | 4.0953391  | 270.2700277 |    |            |            |             |
| H | 2.7566615  | 2.3758497  | 264.9646212 |    |            |            |             |
| H | 5.1814531  | 4.8565508  | 270.6189335 |    |            |            |             |
| H | 5.8870801  | 6.7194205  | 266.4631745 |    |            |            |             |
| H | 4.0947382  | 2.5244634  | 263.7561139 |    |            |            |             |
| H | 9.0032885  | 4.8099985  | 267.6576346 |    |            |            |             |
| H | 4.6245452  | 1.8242541  | 270.4038619 |    |            |            |             |
| H | 3.7888274  | 0.3418528  | 265.9103346 |    |            |            |             |

### 10f-mi

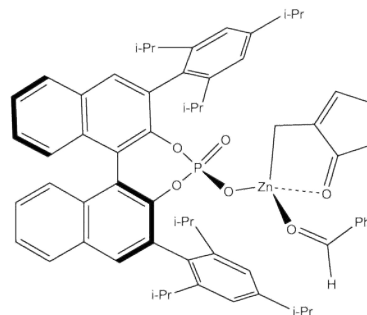

Energy (Hartree) = -5044.062451561

|   |            |            |             |
|---|------------|------------|-------------|
| C | 0.1065510  | 2.0697414  | 329.2461288 |
| C | 0.7911299  | 0.8648262  | 329.4562434 |
| C | 0.1472952  | -0.1521499 | 330.2527256 |
| C | 0.8200721  | -1.3343912 | 330.6865899 |
| C | -1.2245459 | 0.0376664  | 330.6588672 |
| C | -1.8733020 | -0.9777533 | 331.4229339 |
| C | -1.9008353 | 1.2392171  | 330.3012590 |
| H | -2.9620622 | 1.3532156  | 330.5708952 |
| C | -1.2543929 | 2.2730877  | 329.6363919 |
| C | 4.4989038  | 1.4321911  | 328.6240702 |
| C | 4.7965541  | 0.2731070  | 327.9160143 |
| H | 5.8300344  | 0.1025422  | 327.5755928 |
| C | 3.7957294  | -0.6802199 | 327.5749086 |
| C | 4.1037435  | -1.8190555 | 326.7718703 |
| C | 2.4373411  | -0.4745926 | 328.0186414 |
| C | 1.4395062  | -1.3946762 | 327.5751247 |
| C | 2.1409642  | 0.6602426  | 328.8595258 |
| C | 3.1553413  | 1.5985195  | 329.0889851 |
| O | 0.7218566  | 3.0938621  | 328.5550871 |
| O | 2.8892149  | 2.7024384  | 329.8654223 |
| P | 1.9434875  | 3.9534917  | 329.3023851 |
| O | 1.5413949  | 4.7687035  | 330.4957426 |
| O | 2.6252348  | 4.6023380  | 328.0680731 |
| C | -1.1969715 | -2.1257199 | 331.8066946 |
| C | 0.1658646  | -2.2950052 | 331.4451977 |

|   |            |            |             |    |            |           |             |
|---|------------|------------|-------------|----|------------|-----------|-------------|
| H | -2.9237546 | -0.8223551 | 331.7158861 | C  | 6.0845519  | 3.2081820 | 327.7748389 |
| H | -1.7079030 | -2.8974734 | 332.4024410 | H  | 7.2050769  | 1.4881236 | 325.9121668 |
| H | 1.8773248  | -1.4738962 | 330.4212747 | H  | 7.6374301  | 3.1442130 | 325.3964884 |
| H | 0.7112265  | -3.1930142 | 331.7738031 | C  | 5.4427699  | 2.0202436 | 331.4158266 |
| C | 1.7689786  | -2.4826701 | 326.7787951 | C  | 5.5317986  | 2.4859477 | 328.8725774 |
| C | 3.1142904  | -2.7095003 | 326.3844264 | C  | 5.6442583  | 2.9842465 | 326.3265342 |
| H | 0.3929693  | -1.2275343 | 327.8649163 | H  | 3.9952632  | 3.5752449 | 331.9631354 |
| H | 0.9781141  | -3.1724928 | 326.4463769 | H  | 4.1076125  | 4.5270074 | 326.2210344 |
| H | 3.3652263  | -3.5805626 | 325.7600263 | H  | 5.5521147  | 3.6788107 | 332.8626900 |
| H | 5.1473388  | -1.9677007 | 326.4520085 | H  | 7.6482944  | 6.7419535 | 330.9296441 |
| C | -2.1203884 | 4.5804968  | 330.2245468 | H  | 5.7430754  | 5.1151154 | 325.7351110 |
| C | -1.9593428 | 3.5433326  | 329.2671014 | H  | 10.1667993 | 3.9435116 | 330.2173500 |
| C | -2.8295347 | 5.7365893  | 329.8479234 | H  | 4.6470727  | 1.3303818 | 331.0727519 |
| C | -2.4704736 | 3.6976778  | 327.9494391 | H  | 4.8374395  | 2.2256124 | 326.3314079 |
| C | -3.1637517 | 4.8785807  | 327.6224268 | H  | 7.3385143  | 3.9188170 | 331.4133098 |
| C | -3.3682230 | 5.9061365  | 328.5619847 | Zn | 3.6481081  | 6.2791339 | 328.0964363 |
| H | -2.9701734 | 6.5423566  | 330.5852153 | H  | 2.1031816  | 6.1236833 | 332.8151054 |
| C | -2.2798696 | 2.6141741  | 326.8884788 | H  | 5.2845157  | 7.9428816 | 329.1458252 |
| H | -3.5761392 | 4.9860023  | 326.6053357 | C  | 3.9750719  | 6.8013218 | 331.9382028 |
| C | -1.2857144 | 3.0591093  | 325.7997508 | C  | 2.6168152  | 7.0637304 | 332.5118254 |
| H | -1.6886612 | 3.9082194  | 325.2086979 | H  | 4.8108983  | 6.3941103 | 332.5234935 |
| H | -1.0817954 | 2.2292326  | 325.0914979 | C  | 3.9601802  | 7.0882475 | 330.6104837 |
| H | -0.3224065 | 3.3736995  | 326.2475489 | C  | 4.9108456  | 6.9517899 | 329.4823041 |
| C | -3.6156150 | 2.1521809  | 326.2814100 | C  | 2.5658051  | 7.5159444 | 330.3041864 |
| H | -1.8345659 | 1.7332837  | 327.3942997 | O  | 1.8414583  | 7.6234676 | 331.4333365 |
| H | -4.1159097 | 2.9664525  | 325.7161081 | O  | 2.0977332  | 7.6953777 | 329.1760556 |
| H | -4.3188396 | 1.8095355  | 327.0671961 | H  | 2.6077786  | 7.7719334 | 333.3686540 |
| H | -3.4539036 | 1.3124452  | 325.5742697 | H  | 5.7640792  | 6.2894366 | 329.7084659 |
| C | -4.1846109 | 7.1491132  | 328.2246489 | C  | 0.5165476  | 7.3229855 | 322.6929245 |
| C | -3.6080837 | 7.9362951  | 327.0368837 | C  | 1.3183289  | 7.1930969 | 323.8287063 |
| H | -4.1830844 | 8.8690917  | 326.8623647 | C  | 0.7280893  | 6.8401368 | 325.0664063 |
| H | -3.6559453 | 7.3438364  | 326.0992297 | C  | -0.6651933 | 6.6179397 | 325.1541547 |
| H | -2.5489733 | 8.2147313  | 327.2088970 | C  | -1.4619574 | 6.7462815 | 324.0096966 |
| C | -5.6645395 | 6.7933183  | 327.9905150 | C  | -0.8724431 | 7.0985077 | 322.7839514 |
| H | -4.1366441 | 7.8126059  | 329.1159399 | H  | 0.9662665  | 7.5970118 | 321.7266744 |
| H | -6.2707874 | 7.7050044  | 327.8079519 | H  | 2.4059769  | 7.3550209 | 323.7901896 |
| H | -6.0928028 | 6.2625085  | 328.8642218 | C  | 1.5376409  | 6.6709425 | 326.2682220 |
| H | -5.7803814 | 6.1295013  | 327.1079518 | H  | -1.1130477 | 6.3318591 | 326.1196061 |
| C | -1.5698300 | 4.4490671  | 331.6435228 | H  | -2.5459347 | 6.5681589 | 324.0712237 |
| C | -1.0035468 | 5.7662544  | 332.1942953 | H  | -1.5004043 | 7.1983443 | 321.8850339 |
| H | -0.4887497 | 5.5769378  | 333.1592216 | O  | 2.7759043  | 6.8148622 | 326.2851531 |
| H | -1.8004887 | 6.5121178  | 332.3991112 | H  | 0.9950816  | 6.3888288 | 327.2024913 |
| H | -0.2679794 | 6.2083727  | 331.4976146 |    |            |           |             |
| C | -2.6360925 | 3.8753546  | 332.5968773 |    |            |           |             |
| H | -0.7229733 | 3.7337427  | 331.5950094 |    |            |           |             |
| H | -2.2242500 | 3.7595633  | 333.6210300 |    |            |           |             |
| H | -3.0005126 | 2.8835590  | 332.2655789 |    |            |           |             |
| H | -3.5138713 | 4.5530449  | 332.6576633 |    |            |           |             |
| H | 8.6492690  | 6.1508764  | 328.6777913 |    |            |           |             |
| H | 7.3727282  | 1.7689550  | 332.4532705 |    |            |           |             |
| H | 6.4525202  | 2.1963761  | 324.4447035 |    |            |           |             |
| C | 8.7077225  | 5.4249824  | 329.5197915 |    |            |           |             |
| H | 4.3606334  | 2.4114848  | 333.2786713 |    |            |           |             |
| H | 9.4232972  | 6.9940553  | 330.8637445 |    |            |           |             |
| H | 4.7851063  | 4.0816568  | 324.6325966 |    |            |           |             |
| C | 7.5628534  | 4.4370256  | 329.3213478 |    |            |           |             |
| C | 6.5375626  | 1.1508155  | 332.0619636 |    |            |           |             |
| C | 8.6242497  | 6.2259679  | 330.8275295 |    |            |           |             |
| H | 8.7609558  | 5.5758375  | 331.7167335 |    |            |           |             |
| C | 6.9885583  | 3.7260320  | 330.3875991 |    |            |           |             |
| C | 6.7975713  | 2.4223628  | 325.4749595 |    |            |           |             |
| H | 10.1489974 | 4.1565000  | 328.4412232 |    |            |           |             |
| C | 7.0831082  | 4.1667544  | 328.0285434 |    |            |           |             |
| C | 10.0609725 | 4.6943900  | 329.4064080 |    |            |           |             |
| H | 10.9090180 | 5.4062266  | 329.4856240 |    |            |           |             |
| H | 7.5112133  | 4.7292403  | 327.1817606 |    |            |           |             |
| C | 4.8018439  | 2.9804531  | 332.4343001 |    |            |           |             |
| H | 6.1253093  | 0.5690821  | 332.9124041 |    |            |           |             |
| H | 6.9652021  | 0.4345194  | 331.3313557 |    |            |           |             |
| C | 5.9804174  | 2.7633870  | 330.1941359 |    |            |           |             |
| C | 5.0436061  | 4.2536547  | 325.6980540 |    |            |           |             |

## 7.1.2 Product Complexes 11

### 11a-ma

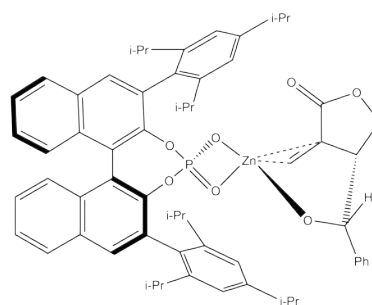

Energy (Hartree) = -5044.055029977

|   |            |            |             |
|---|------------|------------|-------------|
| C | 0.0954850  | 0.7125929  | 809.4030531 |
| C | 0.8555837  | -0.3988010 | 809.7852096 |
| C | 0.2908818  | -1.2797624 | 810.7802288 |
| C | 1.0311199  | -2.3427168 | 811.3796948 |
| C | -1.0664376 | -1.0592668 | 811.2223790 |
| C | -1.6376504 | -1.9456790 | 812.1840479 |
| C | -1.8007355 | 0.0563276  | 810.7261942 |
| H | -2.8334501 | 0.2114986  | 811.0738396 |
| C | -1.2327104 | 0.9781180  | 809.8555228 |

|   |            |            |             |    |            |            |             |
|---|------------|------------|-------------|----|------------|------------|-------------|
| C | 4.4602670  | 0.3329244  | 808.6518955 | C  | 6.6058227  | 4.0972523  | 808.4586712 |
| C | 4.8502858  | -0.9024713 | 808.1507105 | C  | 6.9528609  | 1.0395332  | 811.6735432 |
| H | 5.8702616  | -1.0259107 | 807.7562550 | C  | 6.6086016  | 6.4807931  | 809.3342064 |
| C | 3.9459921  | -2.0019048 | 808.0740754 | H  | 6.7834021  | 6.2193203  | 810.3992020 |
| C | 4.3425187  | -3.2358711 | 807.4767105 | C  | 6.4178039  | 3.4344902  | 809.6843359 |
| C | 2.5909503  | -1.8557402 | 808.5539113 | C  | 6.2042128  | 0.9133753  | 805.2772679 |
| C | 1.6806538  | -2.9341254 | 808.3414558 | H  | 9.2736646  | 4.6619862  | 807.9312959 |
| C | 2.2062610  | -0.6175480 | 809.1905030 | C  | 6.1518357  | 3.4567275  | 807.2951191 |
| C | 3.1397924  | 0.4222763  | 809.1919141 | C  | 8.7888527  | 5.3576720  | 808.6458442 |
| O | 0.6192748  | 1.6211549  | 808.4842590 | H  | 9.2782709  | 6.3493114  | 808.5507988 |
| O | 2.7916837  | 1.6389066  | 809.7771832 | H  | 6.2943731  | 3.9659187  | 806.3286546 |
| P | 1.8058410  | 2.6440792  | 808.9500079 | C  | 4.8979692  | 2.4667258  | 812.1518836 |
| O | 1.4147535  | 3.7767894  | 809.9361829 | H  | 6.8295219  | 0.5229855  | 812.6481556 |
| O | 2.3711331  | 3.2866610  | 807.6637646 | H  | 7.4262010  | 0.3301972  | 810.9647537 |
| C | -0.8996576 | -2.9882459 | 812.7226609 | C  | 5.7637698  | 2.1940229  | 809.7712636 |
| C | 0.4509876  | -3.1752712 | 812.3265212 | C  | 4.3162917  | 2.5945140  | 805.0771546 |
| H | -2.6772966 | -1.7722627 | 812.5034701 | C  | 5.4959150  | 2.2115182  | 807.3207030 |
| H | -1.3515910 | -3.6595898 | 813.4685800 | H  | 6.6946816  | 0.1476643  | 805.9113258 |
| H | 2.0803624  | -2.4927535 | 811.0903074 | H  | 6.9798130  | 1.6591578  | 805.0032349 |
| H | 1.0465393  | -3.9832664 | 812.7781392 | C  | 5.5967935  | 1.5400178  | 811.1413459 |
| C | 2.0947187  | -4.1143148 | 807.7394007 | C  | 5.2912301  | 1.5768761  | 808.5794852 |
| C | 3.4405776  | -4.2766648 | 807.3176835 | C  | 5.0266051  | 1.5927389  | 806.0035734 |
| H | 0.6337148  | -2.8197953 | 808.6542313 | H  | 3.9301727  | 2.8304747  | 811.7549592 |
| H | 1.3704752  | -4.9283265 | 807.5832199 | H  | 3.4852782  | 3.0924903  | 805.6112932 |
| H | 3.7600135  | -5.2200530 | 806.8493527 | H  | 5.5234174  | 3.3498781  | 812.3986657 |
| H | 5.3816729  | -3.3375882 | 807.1262487 | H  | 5.5150937  | 6.5225668  | 809.1601383 |
| C | -2.1398605 | 3.2888140  | 810.3377394 | H  | 5.0094310  | 3.3726114  | 804.6944773 |
| C | -1.9306368 | 2.2267380  | 809.4116554 | H  | 8.9911883  | 4.9795326  | 809.6701279 |
| C | -2.7737674 | 4.4600561  | 809.8864891 | H  | 4.9521314  | 0.6463162  | 811.0134356 |
| C | -2.3381338 | 2.3755606  | 808.0571504 | H  | 4.2851283  | 0.8055361  | 806.2499668 |
| C | -2.9670076 | 3.5705201  | 807.6598086 | H  | 6.7767866  | 3.9094872  | 810.6109715 |
| C | -3.1961821 | 4.6279999  | 808.5568178 | C  | 5.6917623  | 9.3740716  | 806.4646024 |
| H | -2.9180322 | 5.2945491  | 810.5888371 | C  | 4.6704659  | 8.5244714  | 806.9095183 |
| C | -2.1373148 | 1.2722205  | 807.0197608 | C  | 3.9478156  | 8.8283323  | 808.0806107 |
| H | -3.2860983 | 3.6731766  | 806.6111238 | C  | 4.2782138  | 9.9864899  | 808.8073011 |
| C | -1.2938777 | 1.7519547  | 805.8245515 | C  | 5.3015957  | 10.8409381 | 808.3616712 |
| H | -1.8151957 | 2.5458154  | 805.2494432 | C  | 6.0079721  | 10.5383429 | 807.1878128 |
| H | -1.0964099 | 0.9137479  | 805.1247309 | H  | 6.2550128  | 9.1226964  | 805.5524239 |
| H | -0.3180465 | 2.1519781  | 806.1629819 | H  | 4.4405048  | 7.5881585  | 806.3783307 |
| C | -3.4873431 | 0.6875017  | 806.5647047 | C  | 2.8533412  | 7.8742616  | 808.5465092 |
| H | -1.5782193 | 0.4466617  | 807.5050107 | H  | 5.5556587  | 11.7402711 | 808.9435976 |
| H | -4.1093717 | 1.4533256  | 806.0558227 | H  | 6.8141027  | 11.2030102 | 806.8410660 |
| H | -4.0693913 | 0.3033969  | 807.4267314 | O  | 3.2582542  | 6.5775085  | 808.3688909 |
| H | -3.3349279 | -0.1490674 | 805.8515214 | H  | 1.5975554  | 10.2417917 | 808.6023539 |
| C | -3.9128518 | 5.9109268  | 808.1510150 | Zn | 2.1139377  | 5.1429741  | 808.5828923 |
| C | -3.5929438 | 6.3769260  | 806.7232190 | C  | 1.4970021  | 8.2031831  | 807.7129643 |
| H | -4.0557188 | 7.3652394  | 806.5246700 | C  | 0.8657664  | 9.5210630  | 808.1904626 |
| H | -3.9882489 | 5.6757538  | 805.9586516 | C  | 0.4355830  | 7.2276996  | 808.0570697 |
| H | -2.5003182 | 6.4733165  | 806.5598262 | C  | 0.2078960  | 5.9690541  | 807.5726904 |
| C | -5.4331136 | 5.7581532  | 808.3540345 | C  | -0.3800562 | 7.8365145  | 809.1702567 |
| H | -3.5536282 | 6.6989548  | 808.8479563 | O  | -0.0489681 | 9.1604951  | 809.2480613 |
| H | -5.9647370 | 6.7054193  | 808.1253824 | O  | -1.2049970 | 7.3144036  | 809.8856965 |
| H | -5.6719811 | 5.4721601  | 809.3978882 | H  | 0.2936433  | 10.0219863 | 807.3811754 |
| H | -5.8406137 | 4.9675533  | 807.6891434 | H  | 3.7495231  | 10.2091090 | 809.7487600 |
| C | -1.7029180 | 3.2076300  | 811.8004606 | H  | -0.6175675 | 5.3621919  | 807.9861303 |
| C | -0.8865340 | 4.4341294  | 812.2456906 | H  | 0.6825130  | 5.6294396  | 806.6352945 |
| H | -0.5473675 | 4.3040149  | 813.2942164 | H  | 2.6015901  | 8.1197704  | 809.6127256 |
| H | -1.4773298 | 5.3716888  | 812.2008828 | H  | 1.7793984  | 8.2025431  | 806.6428048 |
| H | 0.0052621  | 4.5581658  | 811.6037468 |    |            |            |             |
| C | -2.9208586 | 2.9880932  | 812.7186232 |    |            |            |             |
| H | -1.0406314 | 2.3239228  | 811.9052328 |    |            |            |             |
| H | -2.6033906 | 2.8811186  | 813.7765949 |    |            |            |             |
| H | -3.4909741 | 2.0792124  | 812.4381333 |    |            |            |             |
| H | -3.6199450 | 3.8485950  | 812.6602932 |    |            |            |             |
| H | 7.1328315  | 5.8365874  | 807.3509042 |    |            |            |             |
| H | 7.6596455  | 1.8821745  | 811.8251418 |    |            |            |             |
| H | 5.8627127  | 0.4190545  | 804.3439257 |    |            |            |             |
| C | 7.2742000  | 5.4646336  | 808.3902188 |    |            |            |             |
| H | 4.7009516  | 1.9283944  | 813.1019009 |    |            |            |             |
| H | 7.0219320  | 7.4975519  | 809.1699365 |    |            |            |             |
| H | 3.9024429  | 2.0673639  | 804.1927982 |    |            |            |             |

### 11a-mi

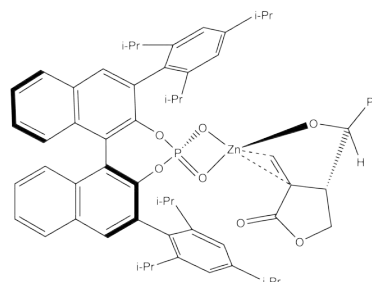

Energy (Hartree) = -5044.054619438

|   |            |            |             |    |            |            |             |
|---|------------|------------|-------------|----|------------|------------|-------------|
| C | -0.0632767 | 0.9570034  | 988.9054989 | H  | -3.6654821 | 2.6214058  | 991.8005671 |
| C | 0.7161587  | -0.0665729 | 989.4493181 | H  | -3.6684001 | 4.4017996  | 991.9518702 |
| C | 0.1450635  | -0.8363540 | 990.5307935 | H  | 8.3805871  | 5.3788193  | 987.4127180 |
| C | 0.8886541  | -1.7984007 | 991.2781415 | H  | 6.8708900  | 2.4671068  | 992.2466370 |
| C | -1.2306608 | -0.5996252 | 990.9038650 | H  | 6.4367032  | 0.4095430  | 984.4259889 |
| C | -1.8147982 | -1.3837542 | 991.9434257 | C  | 8.0462014  | 5.2564482  | 988.4668676 |
| C | -1.9647778 | 0.4513640  | 990.2810825 | H  | 3.7540628  | 2.9275599  | 992.7089693 |
| H | -2.9971482 | 0.6454057  | 990.6097742 | H  | 8.1564611  | 7.4039160  | 988.9027324 |
| C | -1.3899006 | 1.2804720  | 989.3260270 | H  | 4.6300296  | 2.1572932  | 984.0092205 |
| C | 4.3857994  | 0.6717141  | 988.5653128 | C  | 7.0495254  | 4.1030604  | 988.4829018 |
| C | 4.8569295  | -0.6034520 | 988.2736832 | C  | 6.1445652  | 1.6595640  | 992.0173876 |
| H | 5.9251193  | -0.7406131 | 988.0454777 | C  | 7.4079258  | 6.5848308  | 988.9108351 |
| C | 3.9897383  | -1.7316779 | 988.2172166 | H  | 6.9913767  | 6.5143440  | 989.9365960 |
| C | 4.4747697  | -3.0150000 | 987.8236305 | C  | 6.4455405  | 3.6812455  | 989.6809636 |
| C | 2.5896049  | -1.5742213 | 988.5328591 | C  | 6.7060959  | 0.9236028  | 985.3717849 |
| C | 1.7307210  | -2.7030100 | 988.3738615 | H  | 9.7638619  | 3.9801849  | 988.9792787 |
| C | 2.1079083  | -0.2817278 | 988.9585029 | C  | 6.7154352  | 3.4127419  | 987.3067698 |
| C | 3.0017599  | 0.7948048  | 988.8949568 | C  | 9.2905935  | 4.9259718  | 989.3115940 |
| O | 0.4604659  | 1.7203596  | 987.8627815 | H  | 10.0457666 | 5.7357109  | 989.2378523 |
| O | 2.5638975  | 2.0763441  | 989.2227696 | H  | 7.1633779  | 3.7452739  | 986.3557999 |
| P | 1.5643001  | 2.8714988  | 988.2011088 | C  | 4.1971676  | 3.2840005  | 991.7561403 |
| O | 1.0639524  | 4.1266893  | 988.9550114 | H  | 5.7301311  | 1.2997366  | 992.9817983 |
| O | 2.1657244  | 3.3186763  | 986.8433782 | H  | 6.7068602  | 0.8248699  | 991.5513179 |
| C | -1.0732564 | -2.3376261 | 992.6231395 | C  | 5.5713943  | 2.5820021  | 989.7360073 |
| C | 0.2948291  | -2.5307215 | 992.2969547 | C  | 4.9011630  | 2.6690785  | 984.9557729 |
| H | -2.8677848 | -1.1999279 | 992.2086551 | C  | 5.8271059  | 2.3184453  | 987.2978212 |
| H | -1.5359790 | -2.9301145 | 993.4269963 | H  | 7.1020480  | 0.1622773  | 986.0743152 |
| H | 1.9509996  | -1.9525888 | 991.0455564 | H  | 7.5343403  | 1.6279975  | 985.1473325 |
| H | 0.8935529  | -3.2627805 | 992.8600434 | C  | 5.0164535  | 2.1609614  | 991.0957362 |
| C | 2.2314409  | -3.9327757 | 987.9701382 | C  | 5.2725263  | 1.8783194  | 988.5328772 |
| C | 3.6172023  | -4.0978846 | 987.7071069 | C  | 5.4886555  | 1.6602741  | 985.9597316 |
| H | 0.6550441  | -2.5865747 | 988.5654703 | H  | 3.3755142  | 3.6218206  | 991.0966855 |
| H | 1.5462276  | -4.7853645 | 987.8474672 | H  | 3.9842471  | 3.1332188  | 985.3676288 |
| H | 4.0041124  | -5.0800845 | 987.3958132 | H  | 4.8186317  | 4.1733913  | 991.9834177 |
| H | 5.5472638  | -3.1231762 | 987.5976386 | H  | 6.5765313  | 6.8738687  | 988.2377091 |
| C | -2.1625446 | 3.6495542  | 989.6986857 | H  | 5.6270382  | 3.4696321  | 984.7008890 |
| C | -2.0229749 | 2.5369874  | 988.8167988 | H  | 9.0279184  | 4.8105980  | 990.3837515 |
| C | -2.6517075 | 4.8588828  | 989.1785857 | H  | 4.3337448  | 1.3023807  | 990.9359448 |
| C | -2.3738586 | 2.6710362  | 987.4472851 | H  | 4.6999674  | 0.9040598  | 986.1470909 |
| C | -2.8407443 | 3.9133445  | 986.9774719 | H  | 6.6686907  | 4.2208707  | 990.6143748 |
| C | -2.9768622 | 5.0277208  | 987.8209221 | Zn | 1.7297616  | 5.2715588  | 987.3799850 |
| H | -2.7591657 | 5.7214898  | 989.8560415 | H  | 2.4593101  | 9.9851405  | 988.7884999 |
| C | -2.2913515 | 1.4971641  | 986.4736077 | C  | 2.9894470  | 8.2172980  | 987.5414960 |
| H | -3.1011502 | 4.0055406  | 985.9130981 | C  | 3.2860747  | 9.2668537  | 988.6283307 |
| C | -1.4611054 | 1.8257866  | 985.2204072 | C  | 3.6269618  | 7.0057802  | 988.1183068 |
| H | -1.9477694 | 2.6055274  | 984.5979964 | C  | 3.9934887  | 5.8361086  | 987.5159796 |
| H | -1.3456983 | 0.9242205  | 984.5841044 | C  | 3.7723164  | 7.2243834  | 989.6018558 |
| H | -0.4496328 | 2.1842655  | 985.4940619 | O  | 3.4856264  | 8.5364951  | 989.8574311 |
| C | -3.7024060 | 1.0016446  | 986.1035775 | O  | 4.1018434  | 6.4327514  | 990.4554438 |
| H | -1.7832326 | 0.6603077  | 986.9953165 | H  | 4.2105653  | 9.8401596  | 988.4050798 |
| H | -4.2786780 | 1.7906872  | 985.5764902 | C  | 0.4060806  | 10.4634530 | 984.5934038 |
| H | -4.2777693 | 0.7152698  | 987.0071576 | C  | 0.9260228  | 9.3389096  | 985.2486122 |
| H | -3.6488854 | 0.1180468  | 985.4339532 | C  | 0.8201947  | 9.2157404  | 986.6477966 |
| C | -3.3924372 | 6.4076037  | 987.3190821 | C  | 0.1661906  | 10.2269437 | 987.3758222 |
| C | -2.1810438 | 7.3625987  | 987.3399104 | C  | -0.3541487 | 11.3560800 | 986.7209614 |
| H | -2.4646894 | 8.3815227  | 987.0041355 | C  | -0.2315206 | 11.4786159 | 985.3284839 |
| H | -1.3676329 | 6.9979494  | 986.6791639 | H  | 0.4897347  | 10.5469807 | 983.4986120 |
| H | -1.7517581 | 7.4506492  | 988.3589149 | H  | 1.3970956  | 8.5209309  | 984.6825330 |
| C | -4.0543698 | 6.4029873  | 985.9363285 | C  | 1.3999209  | 7.9888157  | 987.3383852 |
| H | -4.1393039 | 6.7974423  | 988.0484576 | H  | 0.0374723  | 10.1168876 | 988.4651050 |
| H | -4.4197010 | 7.4178185  | 985.6801384 | H  | -0.8686213 | 12.1371272 | 987.3017987 |
| H | -4.9168315 | 5.7074098  | 985.8907118 | H  | -0.6431941 | 12.3598121 | 984.8127952 |
| H | -3.3351924 | 6.1080609  | 985.1437732 | O  | 1.1491741  | 6.8525947  | 986.5989367 |
| C | -1.7806510 | 3.5869034  | 991.1783155 | H  | 0.9752511  | 7.9455464  | 988.3773719 |
| C | -0.8781547 | 4.7562822  | 991.6113350 | H  | 3.3895633  | 8.4900559  | 986.5460815 |
| H | -0.5341118 | 4.6075081  | 992.6555976 | H  | 4.4439167  | 5.0269346  | 988.1160190 |
| H | -1.4140970 | 5.7280991  | 991.5817353 | H  | 4.0349572  | 5.7445199  | 986.4179953 |
| H | 0.0100663  | 4.8268843  | 990.9547955 |    |            |            |             |
| C | -3.0367406 | 3.4956137  | 992.0652930 |    |            |            |             |
| H | -1.1941943 | 2.6591946  | 991.3347256 |    |            |            |             |
| H | -2.7596689 | 3.4078435  | 993.1364071 |    |            |            |             |

11b-ma

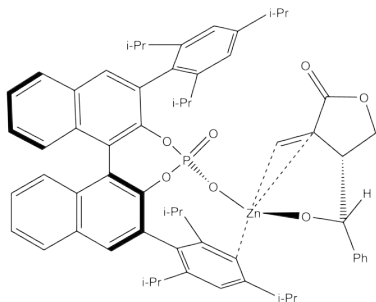

Energy (Hartree) = -5044.064032942

|   |            |            |             |
|---|------------|------------|-------------|
| C | 0.2364735  | 1.0511810  | 269.6713025 |
| C | 0.9988351  | -0.0443470 | 270.1026556 |
| C | 0.5064321  | -0.8141501 | 271.2191543 |
| C | 1.2736930  | -1.8357808 | 271.8558379 |
| C | -0.8037143 | -0.5168911 | 271.7483362 |
| C | -1.3095746 | -1.2949225 | 272.8323245 |
| C | -1.5516217 | 0.5710041  | 271.2123402 |
| H | -2.5471762 | 0.7861473  | 271.6296189 |
| C | -1.0408870 | 1.3953011  | 270.2176243 |
| C | 4.4453535  | 0.5055133  | 268.5081588 |
| C | 4.7870504  | -0.7763798 | 268.1002649 |
| H | 5.7449278  | -0.9503118 | 267.5867004 |
| C | 3.8879817  | -1.8703266 | 268.2623038 |
| C | 4.2160895  | -3.1676206 | 267.7665419 |
| C | 2.5926322  | -1.6484123 | 268.8635190 |
| C | 1.6580078  | -2.7277266 | 268.8560926 |
| C | 2.2849786  | -0.3489231 | 269.4130796 |
| C | 3.2163058  | 0.6800676  | 269.2237865 |
| O | 0.7119052  | 1.8382914  | 268.6352601 |
| O | 2.9790699  | 1.9244547  | 269.7601415 |
| P | 1.8812047  | 2.9496262  | 269.0179707 |
| O | 1.5060591  | 4.0077083  | 270.0082557 |
| O | 2.4416957  | 3.3204676  | 267.6141797 |
| C | -0.5501013 | -2.3032952 | 273.4057972 |
| C | 0.7591314  | -2.5620034 | 272.9210336 |
| H | -2.3154386 | -1.0641168 | 273.2173304 |
| H | -0.9514270 | -2.8902977 | 274.2459585 |
| H | 2.2928216  | -2.0392538 | 271.4986394 |
| H | 1.3749017  | -3.3404313 | 273.3971013 |
| C | 2.0014088  | -3.9723376 | 268.3469549 |
| C | 3.2970448  | -4.2043569 | 267.8143419 |
| H | 0.6488798  | -2.5612579 | 269.2563285 |
| H | 1.2588062  | -4.7847693 | 268.3515590 |
| H | 3.5611189  | -5.1982920 | 267.4223187 |
| H | 5.2127732  | -3.3235986 | 267.3241245 |
| C | -1.8223265 | 3.7749750  | 270.5761603 |
| C | -1.7369949 | 2.6288789  | 269.7327872 |
| C | -2.4170991 | 4.9406822  | 270.0633969 |
| C | -2.2466243 | 2.6831846  | 268.4081279 |
| C | -2.8351430 | 3.8758605  | 267.9490387 |
| C | -2.9276966 | 5.0200616  | 268.7551164 |
| H | -2.4766264 | 5.8339555  | 270.7071498 |
| C | -2.2056823 | 1.4776413  | 267.4708964 |
| H | -3.2158970 | 3.9071467  | 266.9181073 |
| C | -1.4720396 | 1.7851919  | 266.1545679 |
| H | -1.9925298 | 2.5638441  | 265.5600641 |
| H | -1.4089480 | 0.8732626  | 265.5248408 |
| H | -0.4454820 | 2.1510039  | 266.3426020 |
| C | -3.6259272 | 0.9358395  | 267.2201155 |
| H | -1.6418864 | 0.6703805  | 267.9817535 |
| H | -4.2578733 | 1.6871339  | 266.7016718 |
| H | -4.1318299 | 0.6727698  | 268.1715016 |
| H | -3.5945860 | 0.0272193  | 266.5831921 |
| C | -3.5821019 | 6.3150176  | 268.2811544 |
| C | -3.6309929 | 6.4722619  | 266.7556051 |
| H | -3.9884593 | 7.4858064  | 266.4815148 |

|    |            |            |             |
|----|------------|------------|-------------|
| H  | -4.3345073 | 5.7469554  | 266.2956410 |
| H  | -2.6352772 | 6.3111347  | 266.2976381 |
| C  | -4.9899129 | 6.4604351  | 268.8934225 |
| H  | -2.9594733 | 7.1466370  | 268.6853621 |
| H  | -5.4518621 | 7.4299636  | 268.6120679 |
| H  | -4.9610588 | 6.4002656  | 269.9998771 |
| H  | -5.6536657 | 5.6469612  | 268.5325600 |
| C  | -1.3124080 | 3.7736100  | 272.0178607 |
| C  | -0.4562327 | 5.0040080  | 272.3623263 |
| H  | -0.0592363 | 4.9154469  | 273.3947082 |
| H  | -1.0411452 | 5.9471452  | 272.3207612 |
| H  | 0.3994975  | 5.0748797  | 271.6652529 |
| C  | -2.4877198 | 3.6262108  | 273.0042162 |
| H  | -0.6552161 | 2.8886038  | 272.1377459 |
| H  | -2.1225688 | 3.5703380  | 274.0510227 |
| H  | -3.0862663 | 2.7153734  | 272.8012966 |
| H  | -3.1760164 | 4.4946065  | 272.9305113 |
| H  | 6.4867458  | 5.9536413  | 266.1583868 |
| H  | 8.1012678  | 2.5499702  | 270.8201655 |
| H  | 5.0923852  | -0.0335907 | 264.1318707 |
| C  | 7.0728128  | 5.5480260  | 267.0140144 |
| H  | 5.3891535  | 2.7315733  | 272.5639376 |
| H  | 7.5122212  | 7.5690929  | 267.6974296 |
| H  | 3.0962578  | 1.5184876  | 263.9900633 |
| C  | 6.3805970  | 4.2592990  | 267.4372151 |
| C  | 7.4137064  | 1.6827041  | 270.9078886 |
| C  | 7.1038397  | 6.6236766  | 268.1080034 |
| H  | 7.7627446  | 6.3296423  | 268.9513473 |
| C  | 6.4523708  | 3.7545042  | 268.7451911 |
| C  | 5.5547709  | 0.6278660  | 264.8922881 |
| H  | 8.4608148  | 4.4769660  | 265.6675509 |
| C  | 5.6804813  | 3.4783940  | 266.4679799 |
| C  | 8.4866434  | 5.2176435  | 266.4923091 |
| H  | 8.9870068  | 6.1338424  | 266.1179429 |
| H  | 5.7025375  | 3.8048139  | 265.4140888 |
| C  | 5.4089476  | 3.1354209  | 271.5314479 |
| H  | 7.4744609  | 1.3112480  | 271.9511103 |
| H  | 7.7891102  | 0.8838387  | 270.2367158 |
| C  | 5.8678683  | 2.5250497  | 269.1106934 |
| C  | 3.5758937  | 2.2009572  | 264.7198537 |
| C  | 5.1188710  | 2.2073890  | 266.7840756 |
| H  | 6.1820333  | 0.0006076  | 265.5556976 |
| H  | 6.2298080  | 1.3334306  | 264.3634377 |
| C  | 5.9643266  | 2.0755519  | 270.5625778 |
| C  | 5.2056508  | 1.7379217  | 268.1267108 |
| C  | 4.4644642  | 1.3900401  | 265.6749649 |
| H  | 4.3766993  | 3.4264282  | 271.2569057 |
| H  | 2.7609800  | 2.7258319  | 265.2562848 |
| H  | 6.0369468  | 4.0504666  | 271.5481794 |
| H  | 6.0833162  | 6.8123147  | 268.4969615 |
| H  | 4.1569465  | 2.9372122  | 264.1245794 |
| H  | 9.1126305  | 4.7953664  | 267.3056005 |
| H  | 5.3420339  | 1.1648774  | 270.6696608 |
| H  | 3.8113422  | 0.6423291  | 266.1661116 |
| H  | 6.9579974  | 4.3505808  | 269.5173695 |
| C  | 3.4991169  | 10.0325820 | 270.0370443 |
| C  | 3.5161569  | 8.9076869  | 269.2006560 |
| C  | 2.6167806  | 7.8445259  | 269.4144995 |
| C  | 1.7104780  | 7.9190100  | 270.4889579 |
| C  | 1.6898007  | 9.0480442  | 271.3253449 |
| C  | 2.5809860  | 10.1084297 | 271.0999241 |
| H  | 4.2092748  | 10.8565282 | 269.8640199 |
| H  | 4.2436152  | 8.8303572  | 268.3771760 |
| C  | 2.6182358  | 6.6349738  | 268.4940525 |
| H  | 0.9794515  | 9.0909539  | 272.1657047 |
| H  | 2.5684158  | 10.9915189 | 271.7574189 |
| O  | 3.8975528  | 6.2192886  | 268.1937653 |
| H  | -0.0258272 | 6.7810817  | 268.4358077 |
| Zn | 3.8514489  | 4.5937858  | 267.2159767 |
| C  | 1.7738303  | 7.0468576  | 267.1499511 |
| C  | 0.2521081  | 6.9237832  | 267.3727892 |

|   |            |           |             |
|---|------------|-----------|-------------|
| C | 2.0177108  | 6.1066567 | 266.0371420 |
| C | 3.1736047  | 5.8846484 | 265.3369058 |
| C | 0.7869073  | 5.2683060 | 265.8327253 |
| O | -0.1847152 | 5.7467572 | 266.6584221 |
| O | 0.6293062  | 4.3368538 | 265.0738898 |
| H | -0.3077899 | 7.7950505 | 266.9741434 |
| H | 1.0338105  | 7.0725093 | 270.6867909 |
| H | 2.0082872  | 5.8337951 | 268.9727571 |
| H | 2.0970988  | 8.0761898 | 266.9021796 |
| H | 3.1627918  | 5.1400185 | 264.5241122 |
| H | 4.0233734  | 6.5789261 | 265.4207529 |

### 11b-mi

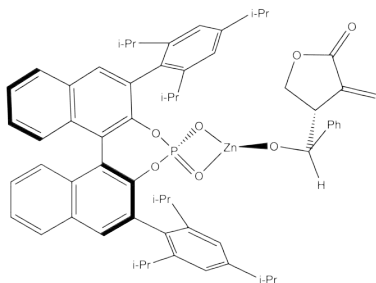

Energy (Hartree) = -5044.045005634

|   |            |            |             |
|---|------------|------------|-------------|
| C | -0.1039978 | 1.0559104  | 988.5133880 |
| C | 0.7573943  | 0.0001644  | 988.8166737 |
| C | 0.2669104  | -1.0241613 | 989.7078696 |
| C | 1.0925489  | -2.0706660 | 990.2166337 |
| C | -1.1130156 | -0.9724202 | 990.1341040 |
| C | -1.6164577 | -2.0038608 | 990.9824030 |
| C | -1.9330823 | 0.1330916  | 989.7613682 |
| H | -2.9676969 | 0.1738780  | 990.1343371 |
| C | -1.4396018 | 1.1890414  | 989.0046630 |
| C | 4.3008411  | 1.2201887  | 987.9301269 |
| C | 4.8320955  | 0.0886557  | 987.3220449 |
| H | 5.8798836  | 0.1056932  | 986.9856264 |
| C | 4.0492431  | -1.0757183 | 987.0802159 |
| C | 4.5908749  | -2.1933832 | 986.3769042 |
| C | 2.6734180  | -1.1162359 | 987.5161808 |
| C | 1.8867278  | -2.2528127 | 987.1593483 |
| C | 2.1388297  | 0.0040950  | 988.2538316 |
| C | 2.9525433  | 1.1364508  | 988.3910829 |
| O | 0.3520077  | 2.0621062  | 987.6631995 |
| O | 2.4576405  | 2.2694560  | 989.0505842 |
| P | 1.3475027  | 3.1918041  | 988.2942469 |
| O | 0.6961452  | 4.1163177  | 989.3633419 |
| O | 1.8092974  | 4.0794476  | 987.1169011 |
| C | -0.7946944 | -3.0269124 | 991.4299156 |
| C | 0.5747664  | -3.0476459 | 991.0557984 |
| H | -2.6727205 | -1.9593981 | 991.2911600 |
| H | -1.1962568 | -3.8116803 | 992.0888036 |
| H | 2.1558742  | -2.0940920 | 989.9413270 |
| H | 1.2342202  | -3.8416123 | 991.4380996 |
| C | 2.4393329  | -3.3151204 | 986.4577983 |
| C | 3.8070308  | -3.2962784 | 986.0761772 |
| H | 0.8243196  | -2.2771325 | 987.4376474 |
| H | 1.8086475  | -4.1764785 | 986.1899665 |
| H | 4.2363199  | -4.1483128 | 985.5275256 |
| H | 5.6453747  | -2.1528975 | 986.0618914 |
| C | -2.3543411 | 3.3603955  | 989.9008617 |
| C | -2.1523605 | 2.4888643  | 988.7914060 |
| C | -2.8870979 | 4.6417432  | 989.6619110 |
| C | -2.4913635 | 2.9228698  | 987.4781767 |
| C | -3.0051676 | 4.2189733  | 987.2971676 |
| C | -3.2098109 | 5.1007266  | 988.3755609 |

|    |            |           |             |
|----|------------|-----------|-------------|
| H  | -3.0430934 | 5.3219240 | 990.5143102 |
| C  | -2.3620219 | 2.0010898 | 986.2672628 |
| H  | -3.2680677 | 4.5471263 | 986.2787749 |
| C  | -1.5838823 | 2.6457790 | 985.1078186 |
| H  | -2.1391516 | 3.5008977 | 984.6676380 |
| H  | -1.4209448 | 1.9108887 | 984.2930397 |
| H  | -0.5930871 | 3.0089972 | 985.4440449 |
| C  | -3.7524546 | 1.5144343 | 985.8154761 |
| H  | -1.7943368 | 1.1027956 | 986.5845051 |
| H  | -4.3860859 | 2.3641173 | 985.4850799 |
| H  | -4.2860303 | 1.0012500 | 986.6407800 |
| H  | -3.6666876 | 0.8050883 | 984.9663158 |
| C  | -3.7803420 | 6.4976059 | 988.1640789 |
| C  | -2.8679809 | 7.3674804 | 987.2819054 |
| H  | -3.2789194 | 8.3935948 | 987.1836885 |
| H  | -2.7868772 | 6.9506995 | 986.2554841 |
| H  | -1.8432607 | 7.4507898 | 987.6997449 |
| C  | -5.2143210 | 6.4391902 | 987.6064967 |
| H  | -3.8299210 | 6.9765850 | 989.1667861 |
| H  | -5.6458593 | 7.4576700 | 987.5188380 |
| H  | -5.8782554 | 5.8374869 | 988.2592716 |
| H  | -5.2335913 | 5.9811292 | 986.5953517 |
| C  | -2.0083615 | 2.9682296 | 991.3374290 |
| C  | -1.2083717 | 4.0494165 | 992.0847209 |
| H  | -0.8893557 | 3.6683454 | 993.0765698 |
| H  | -1.8104864 | 4.9636455 | 992.2680433 |
| H  | -0.3063355 | 4.3334180 | 991.5101574 |
| C  | -3.2832055 | 2.5882127 | 992.1155033 |
| H  | -1.3622375 | 2.0686377 | 991.2931641 |
| H  | -3.0339218 | 2.2549281 | 993.1442718 |
| H  | -3.8445692 | 1.7723231 | 991.6168028 |
| H  | -3.9697494 | 3.4569215 | 992.1972913 |
| H  | 7.4074585  | 6.6598717 | 987.5727671 |
| H  | 7.2104627  | 2.2864146 | 991.5863082 |
| H  | 5.6951987  | 2.0767718 | 983.6822746 |
| C  | 7.5509573  | 6.0683662 | 988.5018783 |
| H  | 4.1687543  | 2.2649170 | 992.5408994 |
| H  | 7.7977692  | 7.9039509 | 989.6644088 |
| H  | 3.8463314  | 3.8053413 | 983.8394821 |
| C  | 6.6534697  | 4.8424596 | 988.3826004 |
| C  | 6.5204241  | 1.4857133 | 991.2474193 |
| C  | 7.1839472  | 6.9804202 | 989.6822354 |
| H  | 7.3606409  | 6.4875413 | 990.6612284 |
| C  | 6.3142933  | 4.0533805 | 989.4953906 |
| C  | 6.0562465  | 2.3737921 | 984.6888275 |
| H  | 9.3114827  | 5.0252675 | 987.6933463 |
| C  | 6.1732091  | 4.4378121 | 987.1259735 |
| C  | 9.0303725  | 5.6422628 | 988.5703826 |
| H  | 9.6987832  | 6.5279788 | 988.5969842 |
| H  | 6.4063077  | 5.0664730 | 986.2531722 |
| C  | 4.4360342  | 2.8913364 | 991.6647398 |
| H  | 6.2848445  | 0.8520699 | 992.1275790 |
| H  | 7.0679130  | 0.8629240 | 990.5112500 |
| C  | 5.5399422  | 2.8845867 | 989.3776979 |
| C  | 4.2160666  | 4.1151469 | 984.8387030 |
| C  | 5.3891300  | 3.2830666 | 986.9499402 |
| H  | 6.5271336  | 1.4868997 | 985.1588268 |
| H  | 6.8506960  | 3.1371156 | 984.5522093 |
| C  | 5.2349721  | 2.0718674 | 990.6350199 |
| C  | 5.0883608  | 2.4844014 | 988.0900137 |
| C  | 4.9015221  | 2.9308400 | 985.5435695 |
| H  | 3.4979753  | 3.2786575 | 991.2210237 |
| H  | 3.3477931  | 4.4738236 | 985.4217176 |
| H  | 5.0225189  | 3.7554032 | 992.0413086 |
| H  | 6.1183653  | 7.2828607 | 989.6430776 |
| H  | 4.9067382  | 4.9689718 | 984.6825012 |
| H  | 9.2276262  | 5.0380279 | 989.4811406 |
| H  | 4.6011983  | 1.2110682 | 990.3388633 |
| H  | 4.1400321  | 2.1295168 | 985.6423566 |
| H  | 6.6724066  | 4.3496038 | 990.4940425 |
| Zn | 0.8226617  | 5.6650896 | 988.0776462 |



|   |            |            |             |
|---|------------|------------|-------------|
| H | 3.9867917  | 6.7293145  | 988.7827111 |
| C | 2.8379384  | 8.3501863  | 987.7603768 |
| C | 3.7057883  | 7.0630271  | 987.7623863 |
| C | 3.7643369  | 9.3740551  | 987.1587383 |
| C | 3.6033492  | 10.7013780 | 987.0006046 |
| C | 5.0240475  | 8.6819110  | 986.7269281 |
| O | 4.9201182  | 7.3566820  | 987.0499291 |
| O | 6.0024739  | 9.1398312  | 986.1789201 |
| H | 3.2279600  | 6.2031930  | 987.2444680 |
| C | 2.4348232  | 7.0745516  | 983.5217696 |
| C | 2.4293971  | 7.7569038  | 984.7467412 |
| C | 1.4386843  | 7.4987123  | 985.7190335 |
| C | 0.4208361  | 6.5777434  | 985.3869458 |
| C | 0.4236079  | 5.8909408  | 984.1619258 |
| C | 1.4402271  | 6.1275057  | 983.2278859 |
| H | 3.2347517  | 7.2799068  | 982.7940704 |
| H | 3.2114885  | 8.5042501  | 984.9348883 |
| C | 1.4255550  | 8.1649687  | 987.1056638 |
| H | -0.4190544 | 6.4225934  | 986.0842348 |
| H | -0.3771442 | 5.1685822  | 983.9444799 |
| H | 1.4565424  | 5.5825844  | 982.2719047 |
| O | 0.6014865  | 7.4866564  | 988.0224742 |
| H | 2.6888526  | 11.2248358 | 987.3195232 |
| H | 4.4119160  | 11.2868676 | 986.5342910 |
| H | 1.0017334  | 9.1926684  | 986.9828737 |
| H | 2.5900765  | 8.6416509  | 988.8012452 |

### 11c-mi

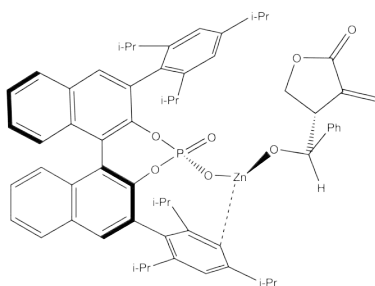

Energy (Hartree) = -5044.057408975

|   |            |            |             |
|---|------------|------------|-------------|
| C | 0.1179935  | 0.9373335  | 988.6294480 |
| C | 0.9920583  | 0.0566777  | 989.2770253 |
| C | 0.5269356  | -0.5808654 | 990.4872931 |
| C | 1.3735562  | -1.3720980 | 991.3206501 |
| C | -0.8444158 | -0.3881523 | 990.9025661 |
| C | -1.3222316 | -1.0588180 | 992.0681302 |
| C | -1.6774732 | 0.5269782  | 990.1944153 |
| H | -2.7010543 | 0.7038633  | 990.5603851 |
| C | -1.2013706 | 1.2438065  | 989.1045913 |
| C | 4.5050272  | 0.9388976  | 987.9780277 |
| C | 5.0753767  | -0.3205839 | 987.8442196 |
| H | 6.1236874  | -0.4042199 | 987.5189204 |
| C | 4.3239441  | -1.5127366 | 988.0581995 |
| C | 4.9020783  | -2.7966044 | 987.8257151 |
| C | 2.9419267  | -1.4269902 | 988.4703217 |
| C | 2.1895915  | -2.6370181 | 988.5567187 |
| C | 2.3708173  | -0.1277720 | 988.7357883 |
| C | 3.1532030  | 0.9987120  | 988.4409438 |
| O | 0.5190539  | 1.5506664  | 987.4612446 |
| O | 2.6292096  | 2.2643143  | 988.6404921 |
| P | 1.5362923  | 2.8669153  | 987.5588793 |
| O | 0.8505274  | 3.9448547  | 988.4648780 |
| O | 1.9822129  | 3.2232178  | 986.1778041 |
| C | -0.4809708 | -1.8543582 | 992.8305075 |
| C | 0.8827360  | -1.9931420 | 992.4608420 |
| H | -2.3738254 | -0.9143904 | 992.3625441 |
| H | -0.8615046 | -2.3605447 | 993.7306242 |
| H | 2.4328647  | -1.4821346 | 991.0524386 |

|   |            |            |             |
|---|------------|------------|-------------|
| H | 1.5601829  | -2.5944234 | 993.0861003 |
| C | 2.7780646  | -3.8689233 | 988.3054973 |
| C | 4.1506644  | -3.9548459 | 987.9530795 |
| H | 1.1231856  | -2.5858709 | 988.8167302 |
| H | 2.1722273  | -4.7854468 | 988.3738521 |
| H | 4.6095556  | -4.9371494 | 987.7637297 |
| H | 5.9599959  | -2.8465275 | 987.5234052 |
| C | -2.0501832 | 3.6141069  | 989.2532233 |
| C | -1.8892432 | 2.4220549  | 988.4903480 |
| C | -2.4370415 | 4.8085723  | 988.5815381 |
| C | -2.1877098 | 2.4338807  | 987.0940055 |
| C | -2.5448005 | 3.6420745  | 986.4688122 |
| C | -2.6610260 | 4.8528103  | 987.1766083 |
| H | -2.6504867 | 5.7180616  | 989.1695665 |
| C | -2.1673478 | 1.1569682  | 986.2622789 |
| H | -2.7388192 | 3.6408034  | 985.3863851 |
| C | -1.4145565 | 1.3139209  | 984.9308330 |
| H | -1.9583240 | 1.9708026  | 984.2199663 |
| H | -1.3066977 | 0.3265365  | 984.4385313 |
| H | -0.4017289 | 1.7315536  | 985.0905660 |
| C | -3.6136273 | 0.6654059  | 986.0481255 |
| H | -1.6439402 | 0.3805993  | 986.8541830 |
| H | -4.2072296 | 1.4036767  | 985.4690222 |
| H | -4.1330999 | 0.4968001  | 987.0131349 |
| H | -3.6177736 | -0.2895286 | 985.4839390 |
| C | -3.0856419 | 6.1481653  | 986.4969362 |
| C | -2.2520923 | 6.4536249  | 985.2420663 |
| H | -2.5646502 | 7.4218815  | 984.8021436 |
| H | -2.3734866 | 5.6783241  | 984.4577002 |
| H | -1.1770561 | 6.5382346  | 985.4988515 |
| C | -4.5956349 | 6.1141560  | 986.1939595 |
| H | -2.8878117 | 6.9661155  | 987.2222922 |
| H | -4.9254481 | 7.0793584  | 985.7587990 |
| H | -5.1921842 | 5.9284232  | 987.1098849 |
| H | -4.8390795 | 5.3135468  | 985.4645583 |
| C | -1.7961742 | 3.6932047  | 990.7573288 |
| C | -0.8052121 | 4.8065547  | 991.1457045 |
| H | -0.6567695 | 4.8213736  | 992.2442905 |
| H | -1.1610238 | 5.8192465  | 990.8573927 |
| H | 0.1847877  | 4.6239970  | 990.6808329 |
| C | -3.1315265 | 3.8291338  | 991.5138596 |
| H | -1.3313444 | 2.7373400  | 991.0656756 |
| H | -2.9609923 | 3.8161079  | 992.6095814 |
| H | -3.8255943 | 3.0010986  | 991.2646046 |
| H | -3.6452162 | 4.7812283  | 991.2643596 |
| H | 6.7991885  | 6.1402380  | 985.3551392 |
| H | 7.2626894  | 3.7383497  | 990.7629917 |
| H | 6.0499371  | 0.1124300  | 983.7600298 |
| C | 6.9879889  | 6.0255232  | 986.4464541 |
| H | 4.3028315  | 3.7055393  | 991.8399284 |
| H | 6.7822881  | 8.1853719  | 986.7409139 |
| C | 3.9274707  | 1.4445168  | 983.2363670 |
| C | 6.3455159  | 4.7073431  | 986.8590621 |
| C | 6.7029709  | 2.7809502  | 990.8080820 |
| C | 6.3755881  | 7.2409482  | 987.1565556 |
| H | 6.5886704  | 7.2510462  | 988.2439758 |
| C | 6.1054927  | 4.3930070  | 988.2077157 |
| C | 6.3163196  | 0.8500713  | 984.5456584 |
| H | 8.9663606  | 5.1173709  | 986.0968062 |
| C | 6.0034311  | 3.7461764  | 985.8946148 |
| C | 8.5147255  | 5.9666658  | 986.6487197 |
| H | 8.9984178  | 6.9036358  | 986.3017267 |
| H | 6.1792461  | 3.9845239  | 984.8328724 |
| C | 4.4371074  | 3.9414276  | 990.7634818 |
| H | 6.5651931  | 2.5223594  | 991.8787677 |
| H | 7.3386817  | 1.9999995  | 990.3436055 |
| C | 5.5398821  | 3.1679126  | 988.6005882 |
| C | 4.2388549  | 2.2028912  | 983.9845269 |
| C | 5.4227227  | 2.5085825  | 986.2286328 |
| H | 6.8816903  | 0.3185817  | 985.3379617 |
| H | 7.0049756  | 1.5940108  | 984.0926547 |

|    |            |            |             |
|----|------------|------------|-------------|
| C  | 5.3439859  | 2.8941412  | 990.0913893 |
| C  | 5.1966642  | 2.2129228  | 987.6028657 |
| C  | 5.0563898  | 1.5374006  | 985.1056043 |
| H  | 3.4384724  | 3.9542117  | 990.2857159 |
| H  | 3.3312177  | 2.6788457  | 984.4025282 |
| H  | 4.8620027  | 4.9636456  | 990.6916308 |
| H  | 5.2756396  | 7.2627561  | 987.0403100 |
| H  | 4.8269289  | 2.9722666  | 983.4417747 |
| H  | 8.7610990  | 5.8374799  | 987.7236102 |
| H  | 4.8436450  | 1.9089538  | 990.1937732 |
| H  | 4.4111707  | 0.7482473  | 985.5424441 |
| H  | 6.3577354  | 5.1337925  | 988.9819280 |
| Zn | -0.2939910 | 5.3929663  | 988.0722297 |
| H  | 2.2221315  | 6.4774219  | 990.6249107 |
| C  | 1.5059237  | 8.0924799  | 989.2885409 |
| C  | 2.3752078  | 6.8479995  | 989.5888061 |
| C  | 2.5024446  | 9.2063352  | 989.4529504 |
| C  | 2.3075111  | 10.5333988 | 989.5669751 |
| C  | 3.8786774  | 8.6094349  | 989.4499285 |
| O  | 3.7518845  | 7.2451697  | 989.4526993 |
| O  | 4.9532147  | 9.1678879  | 989.4506824 |
| H  | 2.2079622  | 5.9967697  | 988.9004252 |
| C  | 3.0280355  | 6.3513865  | 985.2296883 |
| C  | 2.0749178  | 6.5528887  | 986.2396943 |
| C  | 1.7811451  | 7.8376653  | 986.7335134 |
| C  | 2.4620767  | 8.9338146  | 986.1604064 |
| C  | 3.4093296  | 8.7445541  | 985.1431251 |
| C  | 3.6986484  | 7.4516534  | 984.6756870 |
| C  | 3.2412341  | 5.3233610  | 984.9014231 |
| H  | 1.5815439  | 5.6498798  | 986.6306167 |
| C  | 0.7940101  | 8.0719888  | 987.8806277 |
| H  | 2.2434386  | 9.9512914  | 986.5202216 |
| H  | 3.9274216  | 9.6157741  | 984.7134957 |
| H  | 4.4502302  | 7.3023963  | 983.8852137 |
| O  | -0.3132272 | 7.2180411  | 987.9075836 |
| H  | 0.3999414  | 9.1095037  | 987.7548153 |
| H  | 0.6727340  | 8.1791466  | 990.0158035 |
| H  | 1.3009265  | 10.9796606 | 989.5772192 |
| H  | 3.1818775  | 11.1983023 | 989.6535385 |

### 11d-mi

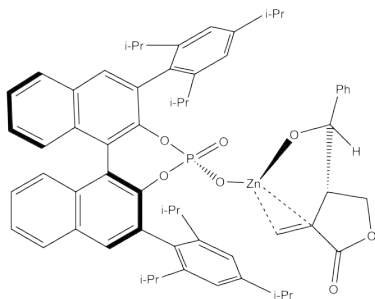

Energy (Hartree) = -5044.054789687

|   |            |            |              |
|---|------------|------------|--------------|
| C | -0.0248182 | 1.7325718  | 998.9300434  |
| C | 0.6599205  | 0.5543252  | 999.2556142  |
| C | 0.0016833  | -0.3833922 | 1000.1342005 |
| C | 0.6602392  | -1.5267319 | 1000.6792236 |
| C | -1.3728956 | -0.1478539 | 1000.5076137 |
| C | -2.0421930 | -1.0946419 | 1001.3394871 |
| C | -2.0275537 | 1.0407645  | 1000.0737482 |
| H | -3.0819162 | 1.1956449  | 1000.3483900 |
| C | -1.3648831 | 2.0165300  | 999.3400811  |
| C | 4.3700435  | 1.1742168  | 998.4625007  |
| C | 4.7360862  | -0.0371381 | 997.8871807  |
| H | 5.7806331  | -0.1898912 | 997.5749854  |
| C | 3.7853849  | -1.0678704 | 997.6339402  |
| C | 4.1653012  | -2.2686224 | 996.9624598  |
| C | 2.4046932  | -0.8813649 | 998.0163853  |
| C | 1.4605053  | -1.8841321 | 997.6414803  |

|   |            |            |              |
|---|------------|------------|--------------|
| C | 2.0347289  | 0.3196815  | 998.7258601  |
| C | 3.0135309  | 1.3069561  | 998.8890118  |
| O | 0.5812994  | 2.6728262  | 998.1114345  |
| O | 2.6762362  | 2.4802960  | 999.5387669  |
| P | 1.7902724  | 3.6112841  | 998.7287837  |
| O | 1.2213247  | 4.4253965  | 999.9507369  |
| O | 2.4622852  | 4.3507234  | 997.6135293  |
| C | -1.3811563 | -2.2124166 | 1001.8248062 |
| C | -0.0133044 | -2.4173757 | 1001.5033978 |
| H | -3.0948866 | -0.9078052 | 1001.6044898 |
| H | -1.9074901 | -2.9304079 | 1002.4719923 |
| H | 1.7208308  | -1.6935083 | 1000.4461199 |
| H | 0.5207131  | -3.2872194 | 1001.9154367 |
| C | 1.8608575  | -3.0322674 | 996.9721468  |
| C | 3.2267121  | -3.2374175 | 996.6423881  |
| H | 0.3988797  | -1.7346640 | 997.8820065  |
| H | 1.1108693  | -3.7870106 | 996.6900874  |
| H | 3.5340601  | -4.1554611 | 996.1187792  |
| H | 5.2233878  | -2.4019765 | 996.6871043  |
| C | -2.1773573 | 4.3517057  | 999.9162875  |
| C | -2.0137037 | 3.3136097  | 998.9545923  |
| C | -2.8184945 | 5.5425016  | 999.5221817  |
| C | -2.4556199 | 3.5111238  | 997.6178153  |
| C | -3.0939522 | 4.7187661  | 997.2795652  |
| C | -3.2960656 | 5.7468990  | 998.2164092  |
| H | -2.9573937 | 6.3484964  | 1000.2599566 |
| C | -2.2599013 | 2.4518995  | 996.5348618  |
| H | -3.4498859 | 4.8561842  | 996.2456598  |
| C | -1.3416425 | 2.9606973  | 995.4076439  |
| H | -1.7944647 | 3.8221564  | 994.8721048  |
| H | -1.1642314 | 2.1616941  | 994.6583878  |
| H | -0.3597379 | 3.2760835  | 995.8115338  |
| C | -3.6071326 | 1.9446666  | 995.9901273  |
| H | -1.7533455 | 1.5829424  | 997.0014371  |
| H | -4.1745608 | 2.7532150  | 995.4834804  |
| H | -4.2460540 | 1.5472731  | 996.8046053  |
| H | -3.4503710 | 1.1336342  | 995.2492774  |
| C | -4.0403480 | 7.0251190  | 997.8475837  |
| C | -3.4108919 | 7.7578540  | 996.6506835  |
| H | -3.9537126 | 8.7020131  | 996.4390904  |
| H | -3.4516571 | 7.1414088  | 995.7282673  |
| H | -2.3479721 | 8.0081855  | 996.8379574  |
| C | -5.5332541 | 6.7351743  | 997.6021421  |
| H | -3.9708873 | 7.7016744  | 998.7280149  |
| H | -6.0916917 | 7.6715008  | 997.3946736  |
| H | -5.9977633 | 6.2425572  | 998.4798074  |
| H | -5.6690149 | 6.0615070  | 996.7301677  |
| C | -1.6804522 | 4.2047879  | 1001.3551861 |
| C | -1.1493489 | 5.5185762  | 1001.9552059 |
| H | -0.5526817 | 5.3165506  | 1002.8669063 |
| H | -1.9669568 | 6.2103477  | 1002.2454011 |
| H | -0.5120190 | 6.0864298  | 1001.2456239 |
| C | -2.7751269 | 3.6375363  | 1002.2810873 |
| H | -0.8352463 | 3.4866949  | 1001.3318597 |
| H | -2.3974226 | 3.5376808  | 1003.3197568 |
| H | -3.1206184 | 2.6398874  | 1001.9522259 |
| H | -3.6574357 | 4.3110924  | 1002.3014173 |
| H | 8.5068963  | 5.8388181  | 997.7951889  |
| H | 7.2356055  | 2.2410355  | 1002.2079571 |
| H | 5.9799541  | 1.5790200  | 994.1971081  |
| C | 8.2033768  | 5.6030903  | 998.8394103  |
| H | 4.2390434  | 2.6822956  | 1003.0082262 |
| H | 8.3637749  | 7.6908541  | 999.4995841  |
| H | 4.2837876  | 3.4828478  | 994.2556610  |
| C | 7.1743963  | 4.4815827  | 998.7538894  |
| C | 6.4763751  | 1.4927424  | 1001.8990625 |
| C | 7.6046976  | 6.8825121  | 999.4510722  |
| H | 7.2319754  | 6.7014781  | 1000.4803749 |
| C | 6.6727108  | 3.8582548  | 999.9106763  |
| C | 6.3618824  | 1.8919760  | 995.1910688  |
| H | 9.9060738  | 4.2459821  | 999.1550316  |

|    |            |            |              |
|----|------------|------------|--------------|
| C  | 6.6910845  | 4.0368968  | 997.5137280  |
| C  | 9.4665931  | 5.1614996  | 999.5995933  |
| H  | 10.2373409 | 5.9596101  | 999.5810253  |
| H  | 7.0542038  | 4.5334623  | 996.5989434  |
| C  | 4.5641150  | 3.1684936  | 1002.0651024 |
| H  | 6.1253584  | 0.9754379  | 1002.8159559 |
| H  | 6.9837941  | 0.7459796  | 1001.2550917 |
| C  | 5.7559433  | 2.7929159  | 999.8521035  |
| C  | 4.6941304  | 3.8119724  | 995.2331753  |
| C  | 5.7602671  | 2.9865737  | 997.3954932  |
| H  | 6.7373678  | 0.9884737  | 995.7127366  |
| H  | 7.2314137  | 2.5615845  | 995.0226287  |
| C  | 5.2969281  | 2.1565222  | 1001.1634872 |
| C  | 5.3154048  | 2.3307630  | 998.5789280  |
| C  | 5.2621366  | 2.6035663  | 996.0009172  |
| H  | 3.6606178  | 3.5630526  | 1001.5611736 |
| H  | 3.8798043  | 4.2877960  | 995.8126255  |
| H  | 5.2055887  | 4.0325005  | 1002.3337771 |
| H  | 6.7493733  | 7.2502691  | 998.8489742  |
| H  | 5.4748251  | 4.5724431  | 995.0203016  |
| H  | 9.2415732  | 4.9436780  | 1000.6642961 |
| H  | 4.5773633  | 1.3494537  | 1000.9172826 |
| H  | 4.4247590  | 1.8886723  | 996.1297051  |
| H  | 7.0103902  | 4.2089296  | 1000.8987147 |
| Zn | 1.4664319  | 6.2662437  | 999.9699471  |
| H  | 3.9191497  | 10.6481476 | 1000.8249957 |
| C  | 3.2789408  | 8.8642135  | 999.6450271  |
| C  | 3.4212752  | 9.6680593  | 1000.9630942 |
| C  | 3.9026139  | 7.5389497  | 1000.0063560 |
| C  | 3.9954836  | 6.3734397  | 999.3168355  |
| C  | 4.4718626  | 7.6442710  | 1001.3983049 |
| O  | 4.2227942  | 8.8934431  | 1001.8750425 |
| O  | 5.0800171  | 6.8039241  | 1002.0253837 |
| H  | 2.4282896  | 9.8164983  | 1001.4346687 |
| C  | 2.2668608  | 7.3695198  | 995.6507791  |
| C  | 2.4691308  | 8.1235966  | 996.8160090  |
| C  | 1.5510605  | 8.0601772  | 997.8857321  |
| C  | 0.3920963  | 7.2613277  | 997.7195326  |
| C  | 0.1923639  | 6.5016778  | 996.5536555  |
| C  | 1.1373940  | 6.5435506  | 995.5222443  |
| H  | 3.0159513  | 7.4048374  | 994.8449857  |
| H  | 3.3768898  | 8.7400926  | 996.8997910  |
| C  | 1.7656665  | 8.7434246  | 999.2483343  |
| H  | -0.3803765 | 7.2566276  | 998.5067939  |
| H  | -0.7021044 | 5.8661913  | 996.4735960  |
| H  | 1.0039180  | 5.9227582  | 994.6238481  |
| O  | 1.0769145  | 8.0651433  | 1000.2637834 |
| H  | 3.8548378  | 9.3510674  | 998.8311133  |
| H  | 1.3672899  | 9.7880213  | 999.1896251  |
| H  | 4.5011946  | 5.5151807  | 999.7929756  |
| H  | 3.6501735  | 6.2375311  | 998.2808751  |

### 11f-ma

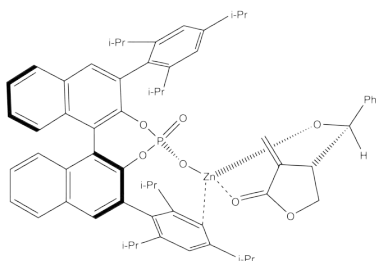

Energy (Hartree) = -5044.06809806

|   |            |            |             |
|---|------------|------------|-------------|
| C | -0.2272339 | 0.7056479  | 819.3089552 |
| C | 0.7163610  | -0.1135634 | 819.9418177 |
| C | 0.3683535  | -0.6887366 | 821.2205212 |
| C | 1.2980629  | -1.4146366 | 822.0257142 |
| C | -0.9669479 | -0.4962998 | 821.7384601 |
| C | -1.3316076 | -1.1019356 | 822.9779700 |
| C | -1.8730327 | 0.3589591  | 821.0474867 |

|   |            |            |             |
|---|------------|------------|-------------|
| H | -2.8637134 | 0.5507943  | 821.4881818 |
| C | -1.5052447 | 1.0105409  | 819.8784601 |
| C | 4.1495466  | 0.8502968  | 818.5349334 |
| C | 4.7674354  | -0.3889528 | 818.4289410 |
| H | 5.8228527  | -0.4411144 | 818.1212145 |
| C | 4.0621292  | -1.6035746 | 818.6721636 |
| C | 4.6838676  | -2.8717181 | 818.4689070 |
| C | 2.6864088  | -1.5568497 | 819.1082180 |
| C | 1.9836594  | -2.7897101 | 819.2604670 |
| C | 2.0682565  | -0.2739130 | 819.3353801 |
| C | 2.7893653  | 0.8743531  | 818.9789248 |
| O | 0.0500737  | 1.2370277  | 818.0683599 |
| O | 2.1914406  | 2.1164988  | 819.1040515 |
| P | 1.0957107  | 2.5313181  | 817.9200895 |
| O | 0.4283953  | 3.7748409  | 818.5783019 |
| O | 1.6145953  | 2.5622666  | 816.5179254 |
| C | -0.4136939 | -1.8367608 | 823.7122077 |
| C | 0.9169479  | -1.9752359 | 823.2368669 |
| H | -2.3579165 | -0.9560988 | 823.3506375 |
| H | -0.7070069 | -2.2937003 | 824.6695706 |
| H | 2.3343203  | -1.5231637 | 821.6789180 |
| H | 1.6569830  | -2.5272859 | 823.8362073 |
| C | 2.6133759  | -4.0063853 | 819.0373329 |
| C | 3.9793568  | -4.0520027 | 818.6520247 |
| H | 0.9233393  | -2.7659329 | 819.5489946 |
| H | 2.0464586  | -4.9427082 | 819.1541250 |
| H | 4.4709052  | -5.0224088 | 818.4841747 |
| H | 5.7367723  | -2.8930995 | 818.1461460 |
| C | -2.3146096 | 3.3903478  | 819.8994340 |
| C | -2.3073973 | 2.1137742  | 819.2639249 |
| C | -2.9377105 | 4.4781091  | 819.2301661 |
| C | -2.9434172 | 1.9488976  | 818.0048506 |
| C | -3.6045783 | 3.0415128  | 817.4081316 |
| C | -3.6167246 | 4.3178768  | 817.9877950 |
| H | -2.9991856 | 5.4558557  | 819.7369323 |
| C | -2.9268374 | 0.6153924  | 817.2681510 |
| H | -4.0923053 | 2.8920760  | 816.4358316 |
| C | -2.3157433 | 0.7506336  | 815.8612520 |
| H | -2.9454605 | 1.3796079  | 815.1984087 |
| H | -2.2276206 | -0.2480187 | 815.3868857 |
| H | -1.3065678 | 1.2030286  | 815.9052265 |
| C | -4.3376888 | -0.0012447 | 817.2255481 |
| H | -2.2829985 | -0.0765363 | 817.8475793 |
| H | -5.0440321 | 0.6396393  | 816.6572854 |
| H | -4.7516993 | -0.1381483 | 818.2451167 |
| H | -4.3126197 | -0.9927688 | 816.7288849 |
| C | -4.3341750 | 5.5155169  | 817.3759358 |
| C | -4.7522003 | 5.3099709  | 815.9168012 |
| H | -5.1596318 | 6.2536201  | 815.5024898 |
| H | -5.5478585 | 4.5407837  | 815.8241085 |
| H | -3.8920374 | 5.0105808  | 815.2888257 |
| C | -5.5443407 | 5.9123779  | 818.2463634 |
| H | -3.5993502 | 6.3520235  | 817.4128929 |
| H | -6.0309552 | 6.8231403  | 817.8416614 |
| H | -5.2541023 | 6.1231784  | 819.2950430 |
| H | -6.3010686 | 5.1001778  | 818.2614610 |
| C | -1.7149364 | 3.6317014  | 821.2839920 |
| C | -0.7994342 | 4.8655455  | 821.3656099 |
| H | -0.4402297 | 5.0018591  | 822.4054775 |
| H | -1.3081891 | 5.8073481  | 821.0717348 |
| H | 0.0910700  | 4.7355310  | 820.7211005 |
| C | -2.8519537 | 3.7083097  | 822.3233203 |
| H | -1.0906079 | 2.7513825  | 821.5322926 |
| H | -2.4362767 | 3.8023817  | 823.3472059 |
| H | -3.4950331 | 2.8057067  | 822.2959497 |
| H | -3.5032648 | 4.5884213  | 822.1391899 |
| H | 7.2628893  | 5.9106160  | 816.4828697 |
| H | 6.7757353  | 3.5280622  | 821.5029094 |
| H | 5.9520141  | 0.1187545  | 814.4645629 |
| C | 6.4774622  | 6.0791244  | 817.2548030 |
| H | 3.7119035  | 3.3366788  | 822.4710168 |

|    |            |            |             |
|----|------------|------------|-------------|
| H  | 5.7688012  | 7.9142564  | 816.2684969 |
| H  | 3.9266865  | 1.4702798  | 813.7221357 |
| C  | 5.9384391  | 4.7000793  | 817.6281629 |
| C  | 6.2240316  | 2.5646902  | 821.4830686 |
| C  | 5.3703523  | 6.9334213  | 816.6018521 |
| H  | 4.5506133  | 7.1261942  | 817.3247521 |
| C  | 5.6680754  | 4.3160312  | 818.9513655 |
| C  | 6.1438414  | 0.8557779  | 815.2720314 |
| H  | 7.9146159  | 6.2354251  | 818.9158302 |
| C  | 5.6594590  | 3.7702704  | 816.6097227 |
| C  | 7.1279573  | 6.8375925  | 818.4181143 |
| H  | 7.5929610  | 7.7769509  | 818.0565955 |
| H  | 5.8800531  | 4.0505874  | 815.5668627 |
| C  | 3.9378352  | 3.6847683  | 821.4418819 |
| H  | 6.0585547  | 2.2507328  | 822.5347582 |
| H  | 6.8806374  | 1.8138965  | 820.9986555 |
| C  | 5.1160283  | 3.0597198  | 819.2666891 |
| C  | 4.1547647  | 2.2264057  | 814.5014116 |
| C  | 5.0999421  | 2.5066792  | 816.8661788 |
| H  | 6.6272213  | 0.3219889  | 816.1148440 |
| H  | 6.8768444  | 1.5966557  | 814.8886205 |
| C  | 4.8851832  | 2.7004612  | 820.7342172 |
| C  | 4.8217790  | 2.1495286  | 818.2165969 |
| C  | 4.8373811  | 1.5514726  | 815.7023158 |
| H  | 2.9813731  | 3.7755252  | 820.8908394 |
| H  | 3.2027807  | 2.6934645  | 814.8147544 |
| H  | 4.3897997  | 4.6949558  | 821.5326610 |
| H  | 4.9360948  | 6.4235707  | 815.7184704 |
| H  | 4.8012715  | 2.9946170  | 814.0274804 |
| H  | 6.3783282  | 7.1219431  | 819.1858151 |
| H  | 4.3992367  | 1.7042676  | 820.7643417 |
| H  | 4.1379163  | 0.7724887  | 816.0678756 |
| H  | 5.8942822  | 5.0101596  | 819.7743429 |
| C  | 2.9084145  | 7.0524921  | 819.6402611 |
| C  | 1.6851311  | 6.8843812  | 818.9709296 |
| C  | 0.9705917  | 7.9966968  | 818.4838830 |
| C  | 1.5152835  | 9.2815932  | 818.6910508 |
| C  | 2.7349757  | 9.4551106  | 819.3617639 |
| C  | 3.4379147  | 8.3366212  | 819.8401832 |
| H  | 3.4491410  | 6.1638843  | 819.9968867 |
| H  | 1.3081805  | 5.8627207  | 818.8266718 |
| C  | -0.3324361 | 7.8569024  | 817.6952933 |
| H  | 3.1348757  | 10.4689826 | 819.5191394 |
| H  | 4.3947567  | 8.4665847  | 820.3693489 |
| O  | -1.1938422 | 6.8462822  | 818.1090245 |
| H  | -2.0443175 | 8.5234583  | 815.7418466 |
| Zn | -0.9928468 | 4.9711902  | 818.1222204 |
| C  | 0.0102907  | 7.7610954  | 816.1438024 |
| C  | -1.2511691 | 7.9089866  | 815.2716235 |
| C  | 0.3933841  | 6.3399153  | 815.8484412 |
| C  | 1.5774021  | 5.6962148  | 815.8939839 |
| C  | -0.9081101 | 5.6643278  | 815.5860775 |
| O  | -1.7969862 | 6.5671509  | 815.1283605 |
| O  | -1.2364633 | 4.4977202  | 815.8236599 |
| H  | -1.0286201 | 8.3043362  | 814.2587927 |
| H  | 0.9646067  | 10.1649583 | 818.3256193 |
| H  | 0.7859309  | 8.5067850  | 815.8854796 |
| H  | -0.8720075 | 8.8326001  | 817.8065248 |
| H  | 1.6302495  | 4.6012479  | 815.7611353 |
| H  | 2.5078054  | 6.2453743  | 816.1027346 |

### 11f-mi

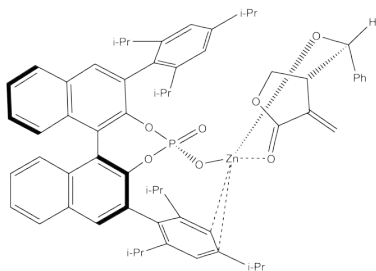

Energy (Hartree) = -5044.043502977

|   |            |            |             |    |            |           |             |
|---|------------|------------|-------------|----|------------|-----------|-------------|
| C | 0.1358818  | 1.6758066  | 989.4620599 | H  | -3.5008596 | 2.7058252 | 992.1387930 |
| C | 0.6979748  | 0.4051455  | 989.6643141 | H  | -3.7613163 | 4.4074101 | 992.6223390 |
| C | -0.1036330 | -0.5806210 | 990.3467489 | H  | 6.8546991  | 6.7220858 | 988.2792845 |
| C | 0.4203155  | -1.8359778 | 990.7789347 | H  | 7.8167795  | 2.0958907 | 991.9576572 |
| C | -1.4842314 | -0.2779919 | 990.6446391 | H  | 5.6033494  | 2.1078610 | 984.3130399 |
| C | -2.2855351 | -1.2615630 | 991.2975935 | C  | 7.3659962  | 6.0447869 | 989.0018954 |
| C | -2.0185139 | 0.9998475  | 990.3048214 | H  | 4.9674486  | 2.0092196 | 993.4698664 |
| H | -3.0814013 | 1.2014390  | 990.5073201 | H  | 7.9046577  | 7.7491807 | 990.2439727 |
| C | -1.2263507 | 1.9992479  | 989.7559129 | H  | 3.2924621  | 3.0073655 | 984.9345980 |
| C | 4.4067825  | 0.9615178  | 988.8475304 | C  | 6.5695828  | 4.7391795 | 989.0155501 |
| C | 4.7152769  | -0.1693331 | 988.1027721 | C  | 7.0791734  | 1.2905651 | 991.7564300 |
| H | 5.7226655  | -0.2796394 | 987.6706956 | C  | 7.4177671  | 6.7597736 | 990.3568643 |
| C | 3.7291401  | -1.1540914 | 987.8051444 | H  | 8.0157782  | 6.1891207 | 991.0974266 |
| C | 4.0422790  | -2.2751316 | 986.9794099 | C  | 6.4024161  | 3.9450031 | 990.1691899 |
| C | 2.3691588  | -0.9637607 | 988.2585886 | C  | 5.9951394  | 2.5307341 | 985.2600289 |
| C | 1.3738131  | -1.8653741 | 987.7730707 | H  | 8.7554406  | 5.3034843 | 987.4521484 |
| C | 2.0721426  | 0.1355936  | 989.1476189 | C  | 6.0763363  | 4.2115256 | 987.7850060 |
| C | 3.1024969  | 1.0397990  | 989.4415976 | C  | 8.7826227  | 5.7698244 | 988.4572227 |
| O | 0.9030175  | 2.6795872  | 988.9081189 | H  | 9.3613336  | 6.7128157 | 988.3826677 |
| O | 2.8863699  | 2.0406243  | 990.3528896 | H  | 6.2581804  | 4.7806002 | 986.8575496 |
| P | 1.9990454  | 3.4043069  | 989.9458832 | C  | 5.1066787  | 2.6736287 | 992.5932291 |
| O | 1.4426298  | 3.9811474  | 991.2026604 | H  | 7.0208098  | 0.6533391 | 992.6624328 |
| O | 2.8283377  | 4.2145186  | 988.9263721 | H  | 7.4737419  | 0.6707953 | 990.9258013 |
| C | -1.7513680 | -2.4831732 | 991.6791271 | C  | 5.7761242  | 2.6847847 | 990.1311247 |
| C | -0.3819511 | -2.7633694 | 991.4293128 | C  | 3.6718965  | 3.3543413 | 985.9169803 |
| H | -3.3397159 | -1.0219771 | 991.5087545 | C  | 5.4356746  | 2.9455119 | 987.7005645 |
| H | -2.3808930 | -3.2281942 | 992.1891669 | H  | 6.8772566  | 1.9308203 | 985.5643550 |
| H | 1.4816096  | -2.0590972 | 990.5998483 | H  | 6.3444262  | 3.5598823 | 985.0336695 |
| H | 0.0497038  | -3.7206403 | 991.7595688 | C  | 5.6920137  | 1.8725219 | 991.4179563 |
| C | 1.7081087  | -2.9342266 | 986.9530651 | C  | 5.2705267  | 2.1834797 | 988.8953838 |
| C | 3.0560311  | -3.1577360 | 986.5673335 | C  | 4.8956452  | 2.5153504 | 986.3369807 |
| H | 0.3244635  | -1.7031138 | 988.0527238 | H  | 4.1223248  | 3.1104955 | 992.3368217 |
| H | 0.9174633  | -3.6110057 | 986.5945847 | H  | 2.8556889  | 3.2604024 | 986.6586071 |
| H | 3.3107271  | -4.0148596 | 985.9255965 | H  | 5.7807885  | 3.4958502 | 992.9123972 |
| H | 5.0864229  | -2.4126513 | 986.6563418 | H  | 6.4017836  | 6.9119269 | 990.7692978 |
| C | -1.9618840 | 4.3227527  | 990.4672064 | H  | 3.9132378  | 4.4353064 | 985.8280425 |
| C | -1.7334080 | 3.3738670  | 989.4320626 | H  | 9.3323540  | 5.0834418 | 989.1343875 |
| C | -2.4415660 | 5.5992551  | 990.1146617 | H  | 5.0148111  | 1.0174336 | 991.2258511 |
| C | -1.9419250 | 3.7407999  | 988.0729567 | H  | 4.5489530  | 1.4699044 | 986.4335100 |
| C | -2.4164233 | 5.0322428  | 987.7771378 | Hn | 6.7660308  | 4.3257695 | 991.1331828 |
| C | -2.6856273 | 5.9767319  | 988.7838129 | Zn | 4.2919390  | 5.3646667 | 988.5341734 |
| H | -2.6321047 | 6.3350728  | 990.9120923 | H  | 0.2762226  | 6.9496877 | 988.9640094 |
| C | -1.6790562 | 2.7705201  | 986.9222310 | C  | 2.0588842  | 8.1148478 | 988.2510451 |
| H | -2.5937346 | 5.3008551  | 986.7230501 | C  | 1.0473353  | 7.6620149 | 989.3183563 |
| C | -0.6067489 | 3.3056894  | 985.9563320 | C  | 3.2674353  | 8.3221277 | 989.1072854 |
| H | -0.9508274 | 4.2135429  | 985.4181699 | C  | 4.3104349  | 9.1650919 | 989.0143222 |
| H | -0.3558673 | 2.5441742  | 985.1891490 | C  | 3.1521699  | 7.2260634 | 990.1116469 |
| H | 0.3220198  | 3.5624287  | 986.5022993 | O  | 1.8558475  | 6.9306665 | 990.2928195 |
| C | -2.9816267 | 2.4085843  | 986.1858125 | O  | 4.0618733  | 6.5496584 | 990.6043929 |
| H | -1.2852734 | 1.8301567  | 987.3579950 | H  | 0.5513773  | 8.5088561 | 989.8372939 |
| H | -3.4395891 | 3.3000370  | 985.7080178 | C  | 2.2570638  | 8.1691664 | 983.6130562 |
| H | -3.7310031 | 1.9799965  | 986.8818415 | C  | 2.7509007  | 7.8215266 | 984.8799512 |
| H | -2.7882144 | 1.6634108  | 985.3863489 | C  | 1.8998932  | 7.2439677 | 985.8404178 |
| C | -3.2848809 | 7.3426396  | 988.4651467 | C  | 0.5526321  | 7.0038021 | 985.5074086 |
| C | -2.5160126 | 8.1110215  | 987.3787437 | C  | 0.0572641  | 7.3524656 | 984.2414262 |
| H | -2.9532442 | 9.1188498  | 987.2243838 | C  | 0.9082830  | 7.9400443 | 983.2906100 |
| H | -2.5516343 | 7.5877923  | 986.4007069 | H  | 2.9311195  | 8.6177660 | 982.8661470 |
| H | -1.4475774 | 8.2417305  | 987.6429339 | H  | 3.8081446  | 7.9706957 | 985.1458860 |
| C | -4.7741236 | 7.2035080  | 988.0941301 | C  | 2.4188645  | 6.9007280 | 987.2248083 |
| H | -3.2292260 | 7.9414955  | 989.4014531 | H  | -0.1104928 | 6.5208946 | 986.2429682 |
| H | -5.2389278 | 8.1967124  | 987.9215451 | H  | -0.9968264 | 7.1518355 | 983.9920912 |
| H | -5.3408446 | 6.6900174  | 988.8963713 | H  | 0.5233596  | 8.2093860 | 982.2948404 |
| H | -4.8947524 | 6.6063577  | 987.1658957 | O  | 3.7849923  | 6.6130272 | 987.2053253 |
| C | -1.7153295 | 3.9943180  | 991.9389150 | H  | 1.8191010  | 6.0302417 | 987.5931441 |
| C | -1.0356035 | 5.1421330  | 992.7044325 | H  | 1.7335923  | 9.0141951 | 987.6959177 |
| H | -0.7625995 | 4.8017412  | 993.7242749 | H  | 4.3512747  | 9.9379062 | 988.2323903 |
| H | -1.7057768 | 6.0196067  | 992.8248283 | H  | 5.1464103  | 9.0973452 | 989.7283638 |
| H | -0.1050685 | 5.4530891  | 992.1936497 |    |            |           |             |
| C | -3.0254296 | 3.5755330  | 992.6339668 |    |            |           |             |
| H | -1.0131862 | 3.1365480  | 991.9661021 |    |            |           |             |
| H | -2.8380560 | 3.3030380  | 993.6934287 |    |            |           |             |

### 7.1.3 Educt Complexes 14

#### 14a-mi; COSMO

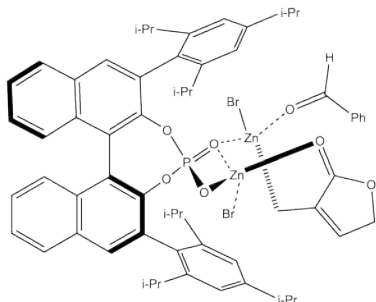

Energy (Hartree) = -11970.0365258

|    |             |            |             |
|----|-------------|------------|-------------|
| Zn | -3.6953804  | 8.4476704  | 237.8317120 |
| Br | -1.6947020  | 9.5621007  | 238.0315219 |
| C  | -7.7278394  | 6.8728595  | 231.2395471 |
| C  | -7.2478764  | 6.8740500  | 232.5527275 |
| C  | -8.0576703  | 7.3835148  | 233.5957368 |
| C  | -9.3534107  | 7.8713124  | 233.3042341 |
| C  | -9.8290490  | 7.8694196  | 231.9875693 |
| C  | -9.0136232  | 7.3729684  | 230.9546664 |
| H  | -7.1002413  | 6.4711527  | 230.4297938 |
| H  | -6.2567679  | 6.4525515  | 232.7841757 |
| C  | -7.5914452  | 7.4193631  | 234.9872079 |
| H  | -9.9866673  | 8.2438165  | 234.1238968 |
| H  | -10.8370396 | 8.2495512  | 231.7633154 |
| H  | -9.3858431  | 7.3673658  | 229.9184965 |
| O  | -6.4827606  | 7.0461595  | 235.3891124 |
| C  | -6.0910227  | 10.2897114 | 233.9038582 |
| C  | -5.2009587  | 9.6570564  | 234.7294969 |
| C  | -5.7197613  | 9.8862820  | 236.1001754 |
| O  | -6.8431800  | 10.6237896 | 236.0788661 |
| C  | -7.1560036  | 10.9503357 | 234.7086699 |
| O  | -5.2795766  | 9.5009068  | 237.1976918 |
| C  | -4.0348745  | 8.8123462  | 234.4624823 |
| H  | -6.0534060  | 10.3279977 | 232.8069693 |
| H  | -7.1721978  | 12.0589352 | 234.6164061 |
| H  | -8.1847659  | 10.5833569 | 234.4964861 |
| Zn | -4.4426757  | 6.8285259  | 234.7487940 |
| Br | -4.2902906  | 4.7262308  | 233.6907675 |
| H  | -3.2060021  | 9.0396780  | 235.1676108 |
| H  | -3.6595526  | 8.9482797  | 233.4299040 |
| C  | -6.4237365  | 4.1376195  | 238.2151618 |
| C  | -5.7240358  | 2.9333773  | 238.3355111 |
| C  | -6.2915480  | 1.8992262  | 239.1661892 |
| C  | -5.5854605  | 0.7027197  | 239.4948716 |
| C  | -7.6076193  | 2.0923200  | 239.7248047 |
| C  | -8.1726784  | 1.0744363  | 240.5504176 |
| C  | -8.3235977  | 3.2857215  | 239.4250258 |
| H  | -9.3599599  | 3.3897704  | 239.7827248 |
| C  | -7.7624285  | 4.3163925  | 238.6780773 |
| C  | -2.0410398  | 3.3921299  | 237.3582497 |
| C  | -1.8404540  | 2.2818058  | 236.5465935 |
| H  | -0.8282839  | 2.0654723  | 236.1734118 |
| C  | -2.9107440  | 1.4221994  | 236.1637817 |
| C  | -2.7030938  | 0.3452048  | 235.2510390 |
| C  | -4.2329174  | 1.6430445  | 236.6980065 |
| C  | -5.2965212  | 0.8017098  | 236.2562046 |
| C  | -4.4309979  | 2.7274476  | 237.6265021 |
| C  | -3.3650824  | 3.5959020  | 237.8485222 |
| O  | -5.8509239  | 5.2047990  | 237.5232107 |
| O  | -3.5835709  | 4.7211409  | 238.6550928 |
| P  | -4.4684933  | 5.9290057  | 238.0128004 |
| O  | -4.5880047  | 7.0319594  | 239.0777893 |
| O  | -3.8435017  | 6.5700741  | 236.7345532 |
| C  | -7.4653183  | -0.0832878 | 240.8379907 |
| C  | -6.1572910  | -0.2623075 | 240.3126936 |
| H  | -9.1819435  | 1.2317078  | 240.9622631 |
| H  | -7.9095867  | -0.8587951 | 241.4803791 |

|   |             |            |             |
|---|-------------|------------|-------------|
| H | -4.5688279  | 0.5557128  | 239.1042081 |
| H | -5.5887747  | -1.1716627 | 240.5604906 |
| C | -5.0636386  | -0.2263896 | 235.3529729 |
| C | -3.7553898  | -0.4665410 | 234.8539628 |
| H | -6.3148769  | 0.9869777  | 236.6263796 |
| H | -5.9012158  | -0.8559627 | 235.0156079 |
| H | -3.5823163  | -1.2880043 | 234.1420549 |
| H | -1.6888464  | 0.1808297  | 234.8545666 |
| C | -8.5653154  | 6.7102456  | 238.9842850 |
| C | -8.5953385  | 5.4907246  | 238.2571278 |
| C | -9.4328784  | 7.7461064  | 238.5976197 |
| C | -9.4738392  | 5.3360465  | 237.1469939 |
| C | -10.3320125 | 6.4047981  | 236.8098148 |
| C | -10.3348432 | 7.6158416  | 237.5254600 |
| H | -9.4265183  | 8.6868013  | 239.1700447 |
| C | -9.4781481  | 4.0466934  | 236.3201431 |
| H | -11.0231715 | 6.2754775  | 235.9657450 |
| C | -8.3749643  | 4.0573257  | 235.2411252 |
| H | -8.6084886  | 4.7999310  | 234.4506640 |
| H | -8.2978311  | 3.0642814  | 234.7524086 |
| H | -7.3769122  | 4.3108430  | 235.6461216 |
| C | -10.8401199 | 3.7181411  | 235.6913510 |
| H | -9.2367672  | 3.2185738  | 237.0183366 |
| H | -11.1074364 | 4.4313530  | 234.8833495 |
| H | -11.6562811 | 3.7320942  | 236.4419956 |
| H | -10.8130919 | 2.7095010  | 235.2315084 |
| C | -11.2614992 | 8.7873074  | 237.1990316 |
| C | -10.4761801 | 9.9807593  | 236.6173887 |
| H | -11.1226414 | 10.8782741 | 236.5321717 |
| H | -10.1017018 | 9.7465148  | 235.5987380 |
| H | -9.5964381  | 10.2440198 | 237.2373594 |
| C | -12.4482023 | 8.4230697  | 236.2991434 |
| H | -11.6771288 | 9.1255398  | 238.1751580 |
| H | -13.1313171 | 9.2892292  | 236.1898617 |
| H | -13.0326892 | 7.5755525  | 236.7098854 |
| H | -12.1195434 | 8.1382681  | 235.2769423 |
| C | -7.6757983  | 6.8748525  | 240.2127106 |
| C | -7.1423009  | 8.3037032  | 240.3937088 |
| H | -6.3630514  | 8.3185270  | 241.1813825 |
| H | -7.9412151  | 9.0081748  | 240.7071226 |
| H | -6.6846391  | 8.6848571  | 239.4603219 |
| C | -8.4125057  | 6.3936360  | 241.4784300 |
| H | -6.7933895  | 6.2181890  | 240.0724442 |
| H | -7.7569836  | 6.4800757  | 242.3695437 |
| H | -8.7287053  | 5.3350019  | 241.3897081 |
| H | -9.3212351  | 7.0052938  | 241.6600416 |
| H | 2.4328398   | 7.7200882  | 238.1437700 |
| H | 0.9020166   | 2.8617974  | 241.1342392 |
| H | -0.4208931  | 4.5631842  | 233.4068826 |
| C | 2.1597255   | 7.1184803  | 239.0385401 |
| H | -2.1276153  | 3.3263920  | 242.0342529 |
| H | 2.3534793   | 8.8583835  | 240.3640514 |
| C | 1.0978176   | 6.1226215  | 238.5903140 |
| C | 0.0732858   | 2.3330936  | 240.6183752 |
| C | 1.6001942   | 8.0886257  | 240.0955204 |
| H | 1.3252305   | 7.5495608  | 241.0266386 |
| C | 0.5474539   | 5.1909647  | 239.4877451 |
| C | -0.0001269  | 4.5404424  | 234.4336017 |
| H | 3.8538073   | 5.7412766  | 238.7615999 |
| C | 0.6119922   | 6.1298340  | 237.2732958 |
| C | 3.4355211   | 6.4162213  | 239.5357654 |
| H | 4.2155448   | 7.1584681  | 239.8047860 |
| H | 1.0249964   | 6.8663971  | 236.5665910 |
| C | -1.6693296  | 4.0512429  | 241.3296194 |
| H | -0.3479206  | 1.5942466  | 241.3315697 |
| H | 0.5104544   | 1.7770447  | 239.7641736 |
| C | -0.4655354  | 4.2939226  | 239.1068158 |
| C | -1.0632756  | 6.7805575  | 234.9049427 |
| C | -0.4002979  | 5.2542073  | 236.8370681 |
| H | 0.0974207   | 3.4790131  | 234.7353478 |
| H | 1.0220757   | 4.9735798  | 234.3994167 |

|   |            |           |             |
|---|------------|-----------|-------------|
| C | -1.0135325 | 3.3162251 | 240.1459670 |
| C | -0.9417623 | 4.3237586 | 237.7660677 |
| C | -0.9006869 | 5.3343925 | 235.3981064 |
| H | -2.4613199 | 4.7404708 | 240.9766733 |
| H | -0.9255443 | 4.6463673 | 241.8997974 |
| H | 0.6911166  | 8.6024957 | 239.7227206 |
| H | 3.2323556  | 5.8050742 | 240.4402623 |
| H | -1.8034589 | 2.7081734 | 239.6591469 |
| H | -1.9078439 | 4.8702043 | 235.3687010 |
| H | 0.9103104  | 5.1681171 | 240.5280936 |
| H | -0.0874038 | 7.2712771 | 234.7078284 |
| H | -1.5999388 | 7.3985064 | 235.6497905 |
| H | -1.6333036 | 6.7928232 | 233.9524770 |
| H | -8.3161058 | 7.8248295 | 235.7376024 |

### 14a-mi

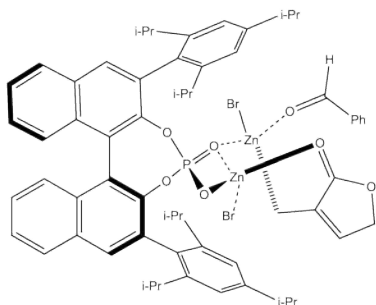

Energy (Hartree) = -11970.02376296

|    |             |            |             |
|----|-------------|------------|-------------|
| Zn | -3.6626919  | 8.4363105  | 237.8519372 |
| Br | -1.6881006  | 9.5881926  | 238.0029368 |
| C  | -7.7410212  | 6.8160327  | 231.2586211 |
| C  | -7.2535779  | 6.8315701  | 232.5691316 |
| C  | -8.0516441  | 7.3684703  | 233.6068028 |
| C  | -9.3425854  | 7.8670191  | 233.3144223 |
| C  | -9.8243630  | 7.8513300  | 232.0001296 |
| C  | -9.0205786  | 7.3287574  | 230.9713220 |
| H  | -7.1223625  | 6.3906658  | 230.4540408 |
| H  | -6.2679849  | 6.3971090  | 232.8033898 |
| C  | -7.5761689  | 7.4185998  | 234.9967582 |
| H  | -9.9670708  | 8.2555327  | 234.1334850 |
| H  | -10.8292571 | 8.2393589  | 231.7748613 |
| H  | -9.3983932  | 7.3113120  | 229.9372228 |
| O  | -6.4683157  | 7.0421153  | 235.3933942 |
| C  | -6.0807059  | 10.2771688 | 233.9180679 |
| C  | -5.1869114  | 9.6461645  | 234.7411022 |
| C  | -5.7065480  | 9.8685747  | 236.1154314 |
| O  | -6.8341693  | 10.6052421 | 236.0942690 |
| C  | -7.1478306  | 10.9321409 | 234.7268212 |
| O  | -5.2673567  | 9.4786877  | 237.2079189 |
| C  | -4.0198863  | 8.8075653  | 234.4745985 |
| H  | -6.0439310  | 10.3157361 | 232.8212587 |
| H  | -7.1693377  | 12.0416408 | 234.6371091 |
| H  | -8.1756051  | 10.5610096 | 234.5146917 |
| Zn | -4.4141518  | 6.8152392  | 234.7537741 |
| Br | -4.2830228  | 4.7372546  | 233.6640645 |
| H  | -3.1946277  | 9.0303753  | 235.1850963 |
| H  | -3.6410568  | 8.9448896  | 233.4436227 |
| C  | -6.4213614  | 4.1371391  | 238.2114131 |
| C  | -5.7266907  | 2.9294321  | 238.3286703 |
| C  | -6.2994811  | 1.8948396  | 239.1550199 |
| C  | -5.5987572  | 0.6942284  | 239.4791096 |
| C  | -7.6149186  | 2.0907685  | 239.7136537 |
| C  | -8.1836437  | 1.0720421  | 240.5348216 |
| C  | -8.3254153  | 3.2879220  | 239.4172669 |
| H  | -9.3616923  | 3.3965158  | 239.7741170 |
| C  | -7.7599034  | 4.3186065  | 238.6740434 |

|   |             |            |             |
|---|-------------|------------|-------------|
| C | -2.0426489  | 3.3875860  | 237.3550011 |
| C | -1.8438433  | 2.2807248  | 236.5385227 |
| H | -0.8320792  | 2.0685453  | 236.1621785 |
| C | -2.9136941  | 1.4220482  | 236.1533805 |
| C | -2.7071555  | 0.3492872  | 235.2361531 |
| C | -4.2355150  | 1.6402881  | 236.6892576 |
| C | -5.2986533  | 0.7997492  | 236.2454422 |
| C | -4.4330678  | 2.7217241  | 237.6212582 |
| C | -3.3665014  | 3.5883526  | 237.8474299 |
| O | -5.8461435  | 5.2046548  | 237.5240470 |
| O | -3.5849099  | 4.7094208  | 238.6588685 |
| P | -4.4599248  | 5.9238538  | 238.0164365 |
| O | -4.5792194  | 7.0262179  | 239.0809556 |
| O | -3.8293040  | 6.5603450  | 236.7392389 |
| C | -7.4816841  | -0.0894081 | 240.8178428 |
| C | -6.1748881  | -0.2715726 | 240.2921672 |
| H | -9.1921663  | 1.2320525  | 240.9474583 |
| H | -7.9294486  | -0.8654203 | 241.4571035 |
| H | -4.5830600  | 0.5456971  | 239.0869524 |
| H | -5.6102797  | -1.1843730 | 240.5359462 |
| C | -5.0657870  | -0.2247158 | 235.3386839 |
| C | -3.7586156  | -0.4615936 | 234.8371764 |
| H | -6.3163631  | 0.9833065  | 236.6180100 |
| H | -5.9032947  | -0.8535280 | 234.9999446 |
| H | -3.5856632  | -1.2793733 | 234.1211424 |
| H | -1.6935618  | 0.1885246  | 234.8367576 |
| C | -8.5520532  | 6.7154262  | 238.9831046 |
| C | -8.5885958  | 5.4965885  | 238.2553198 |
| C | -9.4163095  | 7.7545091  | 238.5982497 |
| C | -9.4691334  | 5.3460926  | 237.1463075 |
| C | -10.3240356 | 6.4179786  | 236.8116010 |
| C | -10.3212451 | 7.6278099  | 237.5287224 |
| H | -9.4040596  | 8.6945569  | 239.1715979 |
| C | -9.4798397  | 4.0565892  | 236.3195334 |
| H | -11.0175125 | 6.2911248  | 235.9691328 |
| C | -8.3730145  | 4.0568039  | 235.2442650 |
| H | -8.5998023  | 4.7964533  | 234.4493774 |
| H | -8.2983649  | 3.0619180  | 234.7591654 |
| H | -7.3745782  | 4.3064176  | 235.6505024 |
| C | -10.8419510 | 3.7377904  | 235.6862592 |
| H | -9.2476037  | 3.2275780  | 237.0198193 |
| H | -11.1002379 | 4.4511964  | 234.8754580 |
| H | -11.6613096 | 3.7595634  | 236.4331080 |
| H | -10.8218546 | 2.7284930  | 235.2276821 |
| C | -11.2468170 | 8.8018092  | 237.2077412 |
| C | -10.4630997 | 9.9941568  | 236.6221050 |
| H | -11.1067180 | 10.8944648 | 236.5429673 |
| H | -10.0975587 | 9.7591872  | 235.6002336 |
| H | -9.5764654  | 10.2530772 | 237.2339343 |
| C | -12.4398421 | 8.4407050  | 236.3150280 |
| H | -11.6566155 | 9.1402414  | 238.1863615 |
| H | -13.1227605 | 9.3074906  | 236.2091374 |
| H | -13.0230666 | 7.5940351  | 236.7288351 |
| H | -12.1175092 | 8.1545772  | 235.2911468 |
| C | -7.6598948  | 6.8761774  | 240.2099619 |
| C | -7.1255597  | 8.3040008  | 240.3953177 |
| H | -6.3396822  | 8.3135676  | 241.1760873 |
| H | -7.9215447  | 9.0066553  | 240.7204827 |
| H | -6.6747263  | 8.6922996  | 239.4616961 |
| C | -8.3939260  | 6.3900490  | 241.4752254 |
| H | -6.7774290  | 6.2207513  | 240.0658010 |
| H | -7.7373196  | 6.4758500  | 242.3654062 |
| H | -8.7072292  | 5.3308595  | 241.3849858 |
| H | -9.3038948  | 6.9987407  | 241.6601009 |
| H | 2.3849169   | 7.7581368  | 238.1504305 |
| H | 0.8990895   | 2.8704548  | 241.1237849 |
| H | -0.3960716  | 4.5411197  | 233.4057938 |
| C | 2.1216665   | 7.1488330  | 239.0430298 |
| H | -2.1327844  | 3.3269098  | 242.0362245 |
| H | 2.2959953   | 8.8855581  | 240.3749392 |
| C | 1.0727054   | 6.1410998  | 238.5915749 |

|   |            |           |             |   |            |            |            |
|---|------------|-----------|-------------|---|------------|------------|------------|
| C | 0.0683626  | 2.3407298 | 240.6123951 | O | 1.7854033  | 4.3034155  | 88.9230276 |
| C | 1.5521906  | 8.1071149 | 240.1051395 | O | 2.0755746  | 3.3913144  | 86.5931292 |
| H | 1.2872956  | 7.5614416 | 241.0352277 | C | 0.1871018  | -1.9897973 | 93.1053902 |
| C | 0.5255147  | 5.2079778 | 239.4887213 | C | 1.4138792  | -2.2270119 | 92.4294155 |
| C | 0.0179910  | 4.5274798 | 234.4351695 | H | -1.6491520 | -0.8417201 | 93.1354268 |
| H | 3.8317285  | 5.7937714 | 238.7544448 | H | -0.0494999 | -2.5464564 | 94.0249591 |
| C | 0.5963491  | 6.1373763 | 237.2715801 | H | 2.6793851  | -1.7270595 | 90.7560262 |
| C | 3.4072709  | 6.4595597 | 239.5329251 | H | 2.1293039  | -2.9582025 | 92.8357089 |
| H | 4.1791499  | 7.2089868 | 239.8054610 | C | 1.7129120  | -3.7593728 | 87.6407822 |
| H | 1.0069111  | 6.8750662 | 236.5648562 | C | 2.9540970  | -4.0686717 | 87.0231397 |
| C | -1.6761866 | 4.0536696 | 241.3325074 | H | 0.5191792  | -2.2688583 | 88.6455002 |
| H | -0.3470948 | 1.6004861 | 241.3275319 | H | 0.9186312  | -4.5202868 | 87.6825944 |
| H | 0.5030476  | 1.7866816 | 239.7558632 | H | 3.1221101  | -5.0713280 | 86.6012305 |
| C | -0.4776767 | 4.3015977 | 239.1059965 | H | 4.9018077  | -3.3224324 | 86.4404881 |
| C | -1.0602249 | 6.7634284 | 234.8859468 | C | -2.0166929 | 3.7616586  | 89.5092975 |
| C | -0.4048727 | 5.2512635 | 236.8320975 | C | -1.9979776 | 2.3787649  | 89.1875495 |
| H | 0.1209614  | 3.4686004 | 234.7435884 | C | -2.9602584 | 4.5875249  | 88.8690990 |
| H | 1.0378098  | 4.9662719 | 234.4065350 | C | -2.9193873 | 1.8439814  | 88.2432270 |
| C | -1.0220823 | 3.3225572 | 240.1457781 | C | -3.8447099 | 2.7138964  | 87.6381263 |
| C | -0.9463069 | 4.3222718 | 237.7625378 | C | -3.8820476 | 4.0877204  | 87.9332468 |
| C | -0.8943262 | 5.3209098 | 235.3888235 | H | -2.9838275 | 5.6622835  | 89.1065784 |
| H | -2.4688844 | 4.7438489 | 240.9836687 | C | -2.8862122 | 0.3701380  | 87.8370138 |
| H | -0.9326155 | 4.6479024 | 241.9036683 | H | -4.5536509 | 2.3029975  | 86.9028028 |
| H | 0.6353044  | 8.6102313 | 239.7375214 | C | -2.1247911 | 0.1797801  | 86.5114460 |
| H | 3.2136658  | 5.8400156 | 240.4337158 | H | -2.6546520 | 0.6826882  | 85.6751639 |
| H | -1.8121111 | 2.7133173 | 239.6604906 | H | -2.0353078 | -0.8966615 | 86.2578213 |
| H | -1.8988540 | 4.8513992 | 235.3526832 | H | -1.0986737 | 0.5938654  | 86.5520723 |
| H | 0.8820164  | 5.1927484 | 240.5313226 | C | -4.2840700 | -0.2668910 | 87.7746193 |
| H | -0.0857980 | 7.2561546 | 234.6870597 | H | -2.3191069 | -0.1763522 | 88.6178733 |
| H | -1.5973257 | 7.3861929 | 235.6264767 | H | -4.8993770 | 0.1577807  | 86.9540527 |
| H | -1.6279595 | 6.7670547 | 233.9320319 | H | -4.8401419 | -0.1232622 | 88.7234466 |
| H | -8.2936982 | 7.8392717 | 235.7462932 | H | -4.2008139 | -1.3567541 | 87.5856826 |

### 14b-ma; COSMO

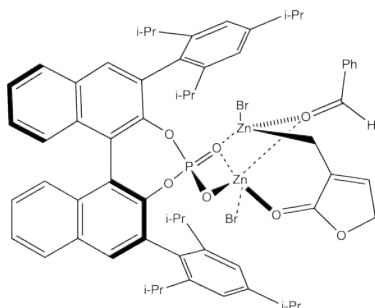

Energy (Hartree) = -11970.03374017

|   |            |            |            |   |            |           |            |
|---|------------|------------|------------|---|------------|-----------|------------|
| C | 0.2523398  | 1.2108191  | 89.1718818 | H | 8.2436241  | 7.1082865 | 88.1483969 |
| C | 1.1147701  | 0.1669845  | 89.5138317 | H | 3.9014544  | 2.8066209 | 83.5264827 |
| C | 0.8227437  | -0.5754397 | 90.7178233 | C | 7.3699395  | 3.7807115 | 87.5754118 |
| C | 1.7226885  | -1.5400389 | 91.2632371 | C | 7.3271346  | 0.6663860 | 90.7095051 |
| C | -0.4070951 | -0.3102804 | 91.4255836 | C | 7.6181212  | 6.1953232 | 88.2362890 |
| C | -0.7019415 | -1.0464897 | 92.6122103 | H | 7.4756741  | 5.9853344 | 89.3175129 |
| C | -1.3097588 | 0.6693995  | 90.9207103 | C | 7.1459044  | 3.0761775 | 88.7708385 |
| H | -2.2836257 | 0.8039410  | 91.4163155 | C | 5.7867911  | 0.8911038 | 84.3455638 |
| C | -1.0029732 | 1.4458386  | 89.8095603 | H | 10.1669699 | 3.8613493 | 87.5831128 |
| C | 4.5151799  | 0.5223174  | 87.7643678 | C | 6.6687013  | 3.3703542 | 86.4294789 |
| C | 4.7385449  | -0.7829254 | 87.3456235 | C | 9.6842511  | 4.7157729 | 88.0994766 |
| H | 5.7090345  | -1.0471028 | 86.8993055 | H | 10.3407952 | 5.6031101 | 87.9857877 |
| C | 3.7384651  | -1.7915738 | 87.4652017 | H | 6.8307067  | 3.9231485 | 85.4911163 |
| C | 3.9437751  | -3.1007212 | 86.9363751 | C | 5.4053804  | 2.2570818 | 91.2275805 |
| C | 2.4921982  | -1.4896189 | 88.1269310 |   |            |           |            |
| C | 1.4888362  | -2.5014221 | 88.1831430 |   |            |           |            |
| C | 2.2945175  | -0.1675946 | 88.6681309 |   |            |           |            |
| C | 3.2584260  | 0.7958029  | 88.3801343 |   |            |           |            |
| O | 0.5615396  | 2.0332133  | 88.0845105 |   |            |           |            |
| O | 3.0404958  | 2.1161001  | 88.7939167 |   |            |           |            |
| P | 1.8777311  | 3.0051356  | 88.0909673 |   |            |           |            |



|    |            |            |            |   |            |            |            |
|----|------------|------------|------------|---|------------|------------|------------|
| H  | 7.1419193  | 0.1154298  | 91.6549370 | C | -1.3181364 | 0.6603669  | 90.9172397 |
| H  | 7.7482692  | -0.0470638 | 89.9722036 | H | -2.2937098 | 0.7964034  | 91.4091780 |
| C  | 6.2399499  | 2.0030581  | 88.8460455 | C | -1.0066958 | 1.4395119  | 89.8095859 |
| C  | 4.6127222  | 3.1239930  | 84.3139949 | C | 4.5128678  | 0.5186827  | 87.7729953 |
| C  | 5.7489417  | 2.3051755  | 86.4489659 | C | 4.7368681  | -0.7856910 | 87.3523619 |
| H  | 6.0307877  | -0.0178788 | 84.9292866 | H | 5.7067784  | -1.0456014 | 86.9024676 |
| H  | 6.7434622  | 1.3264728  | 83.9863958 | C | 3.7387651  | -1.7959928 | 87.4698710 |
| C  | 6.0268724  | 1.3046916  | 90.1886555 | C | 3.9451756  | -3.1032940 | 86.9382176 |
| C  | 5.5353941  | 1.6158647  | 87.6731319 | C | 2.4916161  | -1.4968542 | 88.1308948 |
| C  | 4.9969968  | 1.9167452  | 85.1804806 | C | 1.4895587  | -2.5098024 | 88.1836602 |
| H  | 4.4604134  | 2.6944636  | 90.8496460 | C | 2.2921204  | -0.1760086 | 88.6742044 |
| H  | 4.1289323  | 3.9109603  | 84.9251416 | C | 3.2560975  | 0.7885831  | 88.3901769 |
| H  | 6.0946707  | 3.0925500  | 91.4714726 | O | 0.5620222  | 2.0293023  | 88.0908340 |
| H  | 6.6201710  | 6.4117426  | 87.8034826 | O | 3.0373735  | 2.1069993  | 88.8078203 |
| H  | 5.4918233  | 3.5754620  | 83.8079974 | P | 1.8796590  | 3.0005361  | 88.1039604 |
| H  | 9.6423670  | 4.4749949  | 89.1824060 | O | 1.7853623  | 4.2957414  | 88.9396944 |
| H  | 5.3054496  | 0.4773110  | 90.0283805 | O | 2.0809498  | 3.3896816  | 86.6068858 |
| H  | 4.0486600  | 1.4295038  | 85.4902085 | C | 0.1665897  | -2.0082921 | 93.0977971 |
| H  | 7.6797610  | 3.3827608  | 89.6846930 | C | 1.3940818  | -2.2459114 | 92.4245364 |
| C  | 1.2878922  | 6.6020626  | 80.2539854 | H | -1.6665270 | -0.8562824 | 93.1265768 |
| C  | 1.3377808  | 5.6020597  | 81.2281438 | H | -0.0739459 | -2.5671378 | 94.0149629 |
| C  | 1.7541718  | 5.9262400  | 82.5421196 | H | 2.6645911  | -1.7430551 | 90.7554680 |
| C  | 2.1205779  | 7.2537970  | 82.8688940 | H | 2.1066495  | -2.9803094 | 92.8299206 |
| C  | 2.0665582  | 8.2511845  | 81.8856795 | C | 1.7157708  | -3.7659237 | 87.6390426 |
| C  | 1.6517020  | 7.9251462  | 80.5824659 | C | 2.9571512  | -4.0723087 | 87.0218679 |
| H  | 0.9660957  | 6.3596209  | 79.2298877 | H | 0.5193818  | -2.2784834 | 88.6452893 |
| H  | 1.0564401  | 4.5624870  | 81.0019022 | H | 0.9219968  | -4.5274000 | 87.6778812 |
| C  | 1.7792834  | 4.9172774  | 83.5982398 | H | 3.1263741  | -5.0732904 | 86.5967091 |
| H  | 2.4446626  | 7.4892983  | 83.8964508 | H | 4.9031458  | -3.3219412 | 86.4410057 |
| H  | 2.3502027  | 9.2848109  | 82.1338902 | C | -2.0105993 | 3.7592816  | 89.5102284 |
| H  | 1.6108126  | 8.7088933  | 79.8102571 | C | -1.9974316 | 2.3766683  | 89.1874306 |
| O  | 1.4528532  | 3.7296665  | 83.4493299 | C | -2.9479939 | 4.5894161  | 88.8672259 |
| Zn | 2.0287110  | 5.5185567  | 87.3240326 | C | -2.9191105 | 1.8461344  | 88.2412002 |
| Br | 3.6946889  | 6.9284859  | 86.5912279 | C | -3.8383613 | 2.7207254  | 87.6339893 |
| H  | -0.7373594 | 7.3079996  | 83.0037342 | C | -3.8694097 | 4.0943980  | 87.9289645 |
| Br | 1.4593301  | 0.3355612  | 84.8160750 | H | -2.9667539 | 5.6640728  | 89.1053871 |
| H  | -1.8106445 | 2.8899947  | 84.9617335 | C | -2.8928302 | 0.3716334  | 87.8365716 |
| Zn | 0.7441082  | 2.5558865  | 85.0992572 | H | -4.5482766 | 2.3129134  | 86.8979669 |
| C  | -1.6066298 | 5.4686853  | 83.8293486 | C | -2.1222766 | 0.1718930  | 86.5177878 |
| C  | -1.3662576 | 6.9365524  | 83.8446826 | H | -2.6408067 | 0.6768011  | 85.6758071 |
| C  | -1.0860711 | 4.8907768  | 84.9626739 | H | -2.0395010 | -0.9052159 | 86.2655711 |
| C  | -1.0293176 | 3.5131156  | 85.4360811 | H | -1.0925186 | 0.5761142  | 86.5637446 |
| C  | -0.4622705 | 6.0104812  | 85.6999917 | C | -4.2945837 | -0.2555048 | 87.7645393 |
| O  | -0.6383781 | 7.1819444  | 85.0659632 | H | -2.3363859 | -0.1771936 | 88.6234714 |
| O  | 0.1675883  | 5.9758431  | 86.7741367 | H | -4.8992347 | 0.1680277  | 86.9355130 |
| H  | -2.2950548 | 7.5486848  | 83.8676095 | H | -4.8594966 | -0.1023682 | 88.7064744 |
| H  | -1.1467638 | 3.4642355  | 86.5374673 | H | -4.2181571 | -1.3468209 | 87.5818167 |
| H  | -2.1436956 | 4.9556883  | 83.0203386 | C | -4.8948994 | 5.0203403  | 87.2853091 |
| H  | 2.1261273  | 5.2861237  | 84.5987419 | C | -4.8835301 | 4.9430755  | 85.7493977 |
|    |            |            |            | H | -5.5900269 | 5.6794374  | 85.3131208 |
|    |            |            |            | H | -5.1928773 | 3.9393224  | 85.3903879 |
|    |            |            |            | H | -3.8726230 | 5.1441367  | 85.3418649 |
|    |            |            |            | C | -6.3039868 | 4.7521466  | 87.8466554 |
|    |            |            |            | H | -4.6125200 | 6.0579892  | 87.5708993 |
|    |            |            |            | H | -7.0454814 | 5.4607374  | 87.4221298 |
|    |            |            |            | H | -6.3226837 | 4.8519622  | 88.9504212 |
|    |            |            |            | H | -6.6389747 | 3.7231788  | 87.5986404 |
|    |            |            |            | C | -1.0709759 | 4.3248363  | 90.5723058 |
|    |            |            |            | C | -0.6769844 | 5.7895666  | 90.3341755 |
|    |            |            |            | H | 0.1495142  | 6.0754159  | 91.0148048 |
|    |            |            |            | H | -1.5205329 | 6.4837074  | 90.5322981 |
|    |            |            |            | H | -0.3354073 | 5.9510709  | 89.2942656 |
|    |            |            |            | C | -1.6772388 | 4.1484366  | 91.9788346 |
|    |            |            |            | H | -0.1349298 | 3.7298511  | 90.5331226 |
|    |            |            |            | H | -0.9847798 | 4.5339035  | 92.7555285 |
|    |            |            |            | H | -1.8834271 | 3.0843185  | 92.2067823 |
|    |            |            |            | H | -2.6340921 | 4.7047354  | 92.0649747 |
|    |            |            |            | H | 8.3899663  | 5.2559768  | 86.4036995 |
|    |            |            |            | H | 8.0776760  | 1.4757652  | 90.9127806 |
|    |            |            |            | H | 5.2414623  | 0.5181495  | 83.4552470 |
|    |            |            |            | C | 8.2697376  | 5.0013135  | 87.4800550 |

### 14b-ma

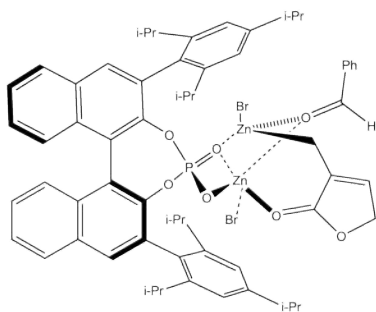

Energy (Hartree) = -11970.02087503

|   |            |            |            |
|---|------------|------------|------------|
| C | 0.2498536  | 1.2040442  | 89.1744086 |
| C | 1.1095264  | 0.1576680  | 89.5163297 |
| C | 0.8118640  | -0.5874880 | 90.7172267 |
| C | 1.7077851  | -1.5557814 | 91.2620989 |
| C | -0.4194018 | -0.3224306 | 91.4221450 |
| C | -0.7184720 | -1.0617873 | 92.6051695 |

|    |            |            |            |
|----|------------|------------|------------|
| H  | 5.1631658  | 1.8222147  | 92.1756522 |
| H  | 8.2317767  | 7.1198000  | 88.0690060 |
| H  | 3.8906552  | 2.7262848  | 83.5156696 |
| C  | 7.3565180  | 3.7838073  | 87.5431580 |
| C  | 7.2890105  | 0.7171396  | 90.7261066 |
| C  | 7.6055590  | 6.2086881  | 88.1698329 |
| H  | 7.4637355  | 6.0148203  | 89.2539910 |
| C  | 7.1199216  | 3.1075723  | 88.7520994 |
| C  | 5.8255333  | 0.8510007  | 84.3378896 |
| H  | 10.1511911 | 3.8630485  | 87.5454044 |
| C  | 6.6701318  | 3.3438055  | 86.4000438 |
| C  | 9.6703255  | 4.7246973  | 88.0509421 |
| H  | 10.3282709 | 5.6095288  | 87.9263894 |
| H  | 6.8411107  | 3.8741203  | 85.4502836 |
| C  | 5.3903653  | 2.3429680  | 91.2221800 |
| H  | 7.1020643  | 0.1882484  | 91.6837492 |
| H  | 7.6961518  | -0.0164315 | 90.0010787 |
| C  | 6.2171980  | 2.0337417  | 88.8427956 |
| C  | 4.6042682  | 3.0587916  | 84.2948717 |
| C  | 5.7531858  | 2.2768128  | 86.4341179 |
| H  | 6.0879503  | -0.0496912 | 84.9264444 |
| H  | 6.7740613  | 1.3036733  | 83.9787567 |
| C  | 5.9958069  | 1.3643911  | 90.1986487 |
| C  | 5.5279998  | 1.6155506  | 87.6713882 |
| C  | 5.0131177  | 1.8632442  | 85.1667535 |
| H  | 4.4521768  | 2.7891072  | 90.8382718 |
| H  | 4.1150620  | 3.8418923  | 84.9065487 |
| H  | 6.0919105  | 3.1716847  | 91.4532923 |
| H  | 6.6071052  | 6.4208738  | 87.7366404 |
| H  | 5.4724845  | 3.5206931  | 83.7793771 |
| H  | 9.6295896  | 4.4967940  | 89.1366251 |
| H  | 5.2629063  | 0.5439815  | 90.0552505 |
| H  | 4.0738292  | 1.3584688  | 85.4757342 |
| H  | 7.6421493  | 3.4377349  | 89.6644205 |
| C  | 1.2941488  | 6.6405261  | 80.3038662 |
| C  | 1.3529527  | 5.6326248  | 81.2693106 |
| C  | 1.7756045  | 5.9461194  | 82.5830566 |
| C  | 2.1394275  | 7.2709787  | 82.9197957 |
| C  | 2.0759364  | 8.2766320  | 81.9450391 |
| C  | 1.6553144  | 7.9616490  | 80.6415363 |
| H  | 0.9687328  | 6.4056251  | 79.2790334 |
| H  | 1.0752589  | 4.5927211  | 81.0396464 |
| C  | 1.8093899  | 4.9233575  | 83.6295431 |
| H  | 2.4677537  | 7.4963694  | 83.9485784 |
| H  | 2.3580014  | 9.3089224  | 82.2009410 |
| H  | 1.6085230  | 8.7519479  | 79.8762810 |
| O  | 1.4737608  | 3.7420824  | 83.4664901 |
| Zn | 2.0326018  | 5.5166498  | 87.3503566 |
| Br | 3.6520574  | 6.9740936  | 86.6212823 |
| H  | -0.7075758 | 7.3077191  | 83.0394366 |
| Br | 1.4663400  | 0.3183958  | 84.8223284 |
| H  | -1.7804513 | 2.8453820  | 84.9042591 |
| Zn | 0.7746019  | 2.5341172  | 85.1074809 |
| C  | -1.5880554 | 5.4530696  | 83.8218321 |
| C  | -1.3480913 | 6.9218479  | 83.8655080 |
| C  | -1.0826741 | 4.8564788  | 84.9526122 |
| C  | -1.0221325 | 3.4754116  | 85.4055883 |
| C  | -0.4681259 | 5.9654584  | 85.7171735 |
| O  | -0.6376221 | 7.1481243  | 85.0986449 |
| O  | 0.1489404  | 5.9085642  | 86.7945595 |
| H  | -2.2781542 | 7.5333495  | 83.8879198 |
| H  | -1.1560563 | 3.4074492  | 86.5040268 |
| H  | -2.1121752 | 4.9513976  | 82.9975598 |
| H  | 2.1691463  | 5.2791984  | 84.6302123 |

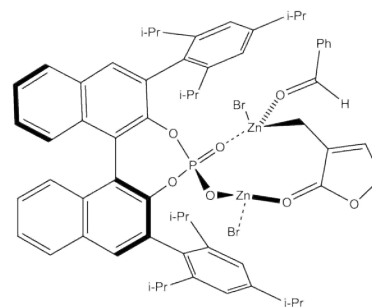

Energy (Hartree) = -11970.03608095

|   |            |            |             |
|---|------------|------------|-------------|
| C | 1.3648289  | 2.0866280  | 100.6437608 |
| C | 2.2287691  | 0.9924595  | 100.5357117 |
| C | 3.1632067  | 0.7639368  | 101.6113328 |
| C | 4.2092858  | -0.2044125 | 101.5358094 |
| C | 3.0579142  | 1.5652728  | 102.8074847 |
| C | 3.9572922  | 1.3243574  | 103.8896898 |
| C | 2.0785006  | 2.5968977  | 102.8808584 |
| H | 1.9887705  | 3.1774246  | 103.8113727 |
| C | 1.2557092  | 2.9104488  | 101.8041427 |
| C | 2.3079051  | -0.1732109 | 96.8685310  |
| C | 2.2457985  | -1.5527576 | 97.0278619  |
| H | 2.3317687  | -2.1991734 | 96.1413171  |
| C | 2.0470633  | -2.1560574 | 98.3021270  |
| C | 1.8942654  | -3.5693833 | 98.4325441  |
| C | 1.9709459  | -1.3246889 | 99.4793327  |
| C | 1.6785489  | -1.9512369 | 100.7287172 |
| C | 2.1611983  | 0.1003097  | 99.3428700  |
| C | 2.2585160  | 0.6264488  | 98.0492702  |
| O | 0.5016925  | 2.3654418  | 99.5910164  |
| O | 2.3915590  | 2.0029009  | 97.8823357  |
| P | 1.1117741  | 2.9821328  | 98.2019238  |
| O | 1.7538183  | 4.3536084  | 98.4641336  |
| O | -0.0046657 | 2.8571671  | 97.1712470  |
| C | 4.9475046  | 0.3582681  | 103.7925428 |
| C | 5.0808255  | -0.4002184 | 102.5985424 |
| H | 3.8581879  | 1.9353749  | 104.8006698 |
| H | 5.6394808  | 0.1878554  | 104.6313271 |
| H | 4.3287352  | -0.7929801 | 100.6154537 |
| H | 5.8851873  | -1.1466326 | 102.5123874 |
| C | 1.5149630  | -3.3267894 | 100.8192641 |
| C | 1.6388931  | -4.1479630 | 99.6665913  |
| H | 1.5693122  | -1.3299819 | 101.6282998 |
| H | 1.2810766  | -3.7835187 | 101.7930631 |
| H | 1.5151959  | -5.2382190 | 99.7528713  |
| H | 1.9668509  | -4.1908417 | 97.5261928  |
| C | 0.7891102  | 5.3897059  | 101.8982654 |
| C | 0.2925582  | 4.0565411  | 101.8637613 |
| C | -0.1189209 | 6.4498888  | 102.0823172 |
| C | -1.1103920 | 3.8244678  | 101.9202002 |
| C | -1.9744342 | 4.9222939  | 102.0851510 |
| C | -1.5026913 | 6.2417694  | 102.1947340 |
| H | 0.2607325  | 7.4835888  | 102.1251016 |
| C | -1.7160854 | 2.4260819  | 101.8173150 |
| H | -3.0590343 | 4.7349426  | 102.1339495 |
| C | -2.6356667 | 2.3000733  | 100.5877912 |
| H | -3.5158196 | 2.9720667  | 100.6640766 |
| H | -3.0172537 | 1.2627606  | 100.4917077 |
| H | -2.0984579 | 2.5509707  | 99.6522358  |
| C | -2.4447561 | 2.0310599  | 103.1150462 |
| H | -0.8868263 | 1.7027251  | 101.6836382 |
| H | -3.3099821 | 2.6971004  | 103.3149586 |
| H | -1.7664450 | 2.0885701  | 103.9906918 |
| H | -2.8309968 | 0.9930534  | 103.0464534 |
| C | -2.4567273 | 7.4142378  | 102.3872647 |
| C | -3.3018681 | 7.6665648  | 101.1246446 |
| H | -3.9706506 | 8.5411337  | 101.2653974 |

14c-ma; COSMO

|    |            |            |             |
|----|------------|------------|-------------|
| H  | -3.9406712 | 6.7892133  | 100.8893639 |
| H  | -2.6603436 | 7.8595529  | 100.2418083 |
| C  | -3.3463720 | 7.2370763  | 103.6301289 |
| H  | -1.8264700 | 8.3161469  | 102.5517536 |
| H  | -3.9784752 | 8.1344891  | 103.7922535 |
| H  | -2.7381288 | 7.0741202  | 104.5427376 |
| H  | -4.0279183 | 6.3678241  | 103.5200723 |
| C  | 2.2686900  | 5.7071653  | 101.6807706 |
| C  | 2.4593365  | 6.8602322  | 100.6797049 |
| H  | 3.5021347  | 6.8972485  | 100.3044392 |
| H  | 2.2396075  | 7.8534422  | 101.1226818 |
| H  | 1.7455885  | 6.7650092  | 99.8302643  |
| C  | 3.0087958  | 6.0272551  | 102.9919630 |
| H  | 2.7357726  | 4.8058881  | 101.2330697 |
| H  | 4.0760083  | 6.2589162  | 102.7952536 |
| H  | 2.9708849  | 5.1788474  | 103.7020703 |
| H  | 2.5553254  | 6.9073034  | 103.4944272 |
| H  | 1.9919182  | 1.6785405  | 90.8965150  |
| H  | 6.4998133  | 0.3604454  | 94.4780993  |
| H  | -1.4340175 | -1.5624451 | 95.0475461  |
| C  | 2.9975033  | 1.7213582  | 91.3694316  |
| H  | 6.2938549  | 2.2563920  | 97.0027055  |
| H  | 3.6135977  | 3.4163957  | 90.1245394  |
| H  | -2.1179512 | 0.9160537  | 95.1042391  |
| C  | 2.8088758  | 1.3323977  | 92.8315929  |
| C  | 6.0979034  | -0.0384571 | 95.4328780  |
| C  | 3.5253629  | 3.1556622  | 91.1994931  |
| H  | 4.5313858  | 3.2741702  | 91.6538240  |
| C  | 3.8937031  | 1.2854790  | 93.7275429  |
| C  | -0.4172970 | -1.2924673 | 94.6947865  |
| H  | 3.4982697  | -0.3244770 | 90.7316969  |
| C  | 1.5400333  | 0.9804238  | 93.3215832  |
| C  | 3.8964814  | 0.7061099  | 90.6393376  |
| H  | 3.9736210  | 0.9514212  | 89.5597981  |
| H  | 0.6776085  | 1.0417811  | 92.6392025  |
| C  | 5.4458722  | 2.2720005  | 96.2873497  |
| H  | 6.9402732  | -0.0846687 | 96.1535463  |
| H  | 5.7491858  | -1.0742570 | 95.2444896  |
| C  | 3.7456019  | 0.8525889  | 95.0594251  |
| C  | -1.1511930 | 1.1214541  | 94.6039314  |
| C  | 1.3358983  | 0.5364533  | 94.6432869  |
| H  | 0.2950846  | -2.0286153 | 95.1156581  |
| H  | -0.4004315 | -1.4008238 | 93.5897555  |
| C  | 4.9621382  | 0.8413917  | 95.9836449  |
| C  | 2.4613324  | 0.4372273  | 95.5072483  |
| C  | -0.0694823 | 0.1521181  | 95.1048086  |
| H  | 4.6403780  | 2.8873781  | 96.7338948  |
| H  | -0.9000993 | 2.1739922  | 94.8317133  |
| H  | 5.7986666  | 2.7840919  | 95.3670968  |
| H  | 2.8543214  | 3.8960709  | 91.6783225  |
| H  | -1.3195447 | 1.0315043  | 93.5104152  |
| H  | 4.9249545  | 0.7078210  | 91.0578166  |
| H  | 4.6456629  | 0.3924789  | 96.9473578  |
| H  | -0.0740544 | 0.2053709  | 96.2134858  |
| H  | 4.8952378  | 1.5838103  | 93.3768357  |
| Zn | 2.5289391  | 5.9980029  | 97.8721457  |
| Br | 4.7743018  | 6.3543485  | 97.5574962  |
| H  | -2.0378846 | 9.0047947  | 95.5071901  |
| Br | -3.5058060 | 3.6712724  | 96.1688737  |
| H  | -2.1289798 | 5.6406721  | 99.1288124  |
| Zn | -1.4265604 | 4.3576831  | 97.0208766  |
| C  | -2.2563776 | 7.8718316  | 97.3685141  |
| C  | -1.7088170 | 9.0004626  | 96.5705116  |
| C  | -1.2365802 | 7.0539782  | 97.7926334  |
| C  | -1.2400220 | 5.7697952  | 98.4841075  |
| C  | -0.0062961 | 7.6922181  | 97.2836237  |
| O  | -0.2780757 | 8.8030109  | 96.5825254  |
| O  | 1.1940510  | 7.3726862  | 97.4198791  |
| H  | -1.9132306 | 10.0102682 | 96.9903438  |
| H  | -0.3258711 | 5.5966082  | 99.0804551  |
| C  | 3.1549026  | 7.5697351  | 93.9979223  |

|   |            |           |            |
|---|------------|-----------|------------|
| C | 2.0060741  | 6.8919361 | 94.4092988 |
| C | 2.0520701  | 5.4869263 | 94.5994978 |
| C | 3.2569247  | 4.7798561 | 94.3731260 |
| C | 4.4058700  | 5.4691674 | 93.9717390 |
| C | 4.3538279  | 6.8597844 | 93.7827781 |
| H | 3.1276519  | 8.6595324 | 93.8496437 |
| H | 1.0631927  | 7.4287174 | 94.5862569 |
| C | 0.8913366  | 4.7352747 | 95.0728691 |
| H | 3.2840458  | 3.6889871 | 94.5234193 |
| H | 5.3472487  | 4.9231688 | 93.8120646 |
| H | 5.2592683  | 7.4027315 | 93.4712329 |
| O | -0.1652491 | 5.2602972 | 95.4634229 |
| H | -3.3296235 | 7.7146293 | 97.5388053 |
| H | 1.0111013  | 3.6228557 | 95.1150543 |

### 14c-ma

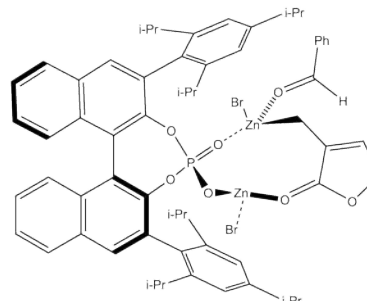

Energy (Hartree) = -11970.02246793

|   |            |            |             |
|---|------------|------------|-------------|
| C | 1.3753646  | 2.0988087  | 100.6411515 |
| C | 2.2359498  | 1.0016761  | 100.5338530 |
| C | 3.1661611  | 0.7678495  | 101.6118559 |
| C | 4.2088470  | -0.2038771 | 101.5373784 |
| C | 3.0596333  | 1.5657157  | 102.8099618 |
| C | 3.9545015  | 1.3180533  | 103.8937158 |
| C | 2.0823325  | 2.5989880  | 102.8828807 |
| H | 1.9884651  | 3.1767274  | 103.8147549 |
| C | 1.2642550  | 2.9182236  | 101.8046422 |
| C | 2.3079699  | -0.1599853 | 96.8656041  |
| C | 2.2414778  | -1.5392093 | 97.0235742  |
| H | 2.3232869  | -2.1833746 | 96.1349762  |
| C | 2.0434498  | -2.1438509 | 98.2969710  |
| C | 1.8865500  | -3.5563028 | 98.4264800  |
| C | 1.9716914  | -1.3136242 | 99.4750312  |
| C | 1.6788883  | -1.9409464 | 100.7236621 |
| C | 2.1670683  | 0.1108017  | 99.3402558  |
| C | 2.2654850  | 0.6386045  | 98.0474023  |
| O | 0.5157222  | 2.3836752  | 99.5888227  |
| O | 2.4057928  | 2.0136222  | 97.8823141  |
| P | 1.1256617  | 2.9952878  | 98.1966844  |
| O | 1.7674599  | 4.3676415  | 98.4553021  |
| O | 0.0119183  | 2.8637257  | 97.1651950  |
| C | 4.9411551  | 0.3489940  | 103.7975349 |
| C | 5.0754885  | -0.4062288 | 102.6022973 |
| H | 3.8545847  | 1.9270051  | 104.8059951 |
| H | 5.6295018  | 0.1738264  | 104.6382500 |
| H | 4.3278566  | -0.7899276 | 100.6154737 |
| H | 5.8770739  | -1.1556111 | 102.5166558 |
| C | 1.5119423  | -3.3157365 | 100.8128323 |
| C | 1.6316879  | -4.1357125 | 99.6596236  |
| H | 1.5730328  | -1.3196711 | 101.6234817 |
| H | 1.2782024  | -3.7726924 | 101.7865006 |
| H | 1.5047318  | -5.2256433 | 99.7445204  |
| H | 1.9550453  | -4.1766914 | 97.5190803  |
| C | 0.7947087  | 5.3969104  | 101.9008826 |
| C | 0.3001950  | 4.0632778  | 101.8657698 |
| C | -0.1156416 | 6.4549020  | 102.0837493 |

|   |            |            |             |
|---|------------|------------|-------------|
| C | -1.1020607 | 3.8280704  | 101.9212788 |
| C | -1.9677918 | 4.9243110  | 102.0850580 |
| C | -1.4988370 | 6.2444123  | 102.1940894 |
| H | 0.2619229  | 7.4893314  | 102.1266629 |
| C | -1.7048787 | 2.4284828  | 101.8178962 |
| H | -3.0520113 | 4.7346233  | 102.1322904 |
| C | -2.6245710 | 2.2993921  | 100.5890213 |
| H | -3.5059706 | 2.9699063  | 100.6620691 |
| H | -3.0054148 | 1.2618991  | 100.4941337 |
| H | -2.0893608 | 2.5477478  | 99.6519620  |
| C | -2.4307819 | 2.0322324  | 103.1167267 |
| H | -0.8737656 | 1.7072601  | 101.6839922 |
| H | -3.2972497 | 2.6960521  | 103.3182411 |
| H | -1.7521280 | 2.0918907  | 103.9917882 |
| H | -2.8154186 | 0.9936231  | 103.0493174 |
| C | -2.4557667 | 7.4151600  | 102.3823215 |
| C | -3.3004071 | 7.6622632  | 101.1183590 |
| H | -3.9712088 | 8.5359164  | 101.2553215 |
| H | -3.9378336 | 6.7833611  | 100.8855545 |
| H | -2.6592104 | 7.8523456  | 100.2346967 |
| C | -3.3452011 | 7.2402445  | 103.6254472 |
| H | -1.8274971 | 8.3190551  | 102.5447669 |
| H | -3.9797689 | 8.1362157  | 103.7856887 |
| H | -2.7369607 | 7.0801254  | 104.5382762 |
| H | -4.0247517 | 6.3692257  | 103.5182832 |
| C | 2.2741732  | 5.7163439  | 101.6845305 |
| C | 2.4656367  | 6.8748605  | 100.6897923 |
| H | 3.5074357  | 6.9117933  | 100.3116799 |
| H | 2.2493220  | 7.8653558  | 101.1409509 |
| H | 1.7538607  | 6.7847461  | 99.8391937  |
| C | 3.0144827  | 6.0276710  | 102.9976245 |
| H | 2.7408047  | 4.8175454  | 101.2312168 |
| H | 4.0808918  | 6.2643647  | 102.8026930 |
| H | 2.9804428  | 5.1734870  | 103.7007620 |
| H | 2.5585553  | 6.9015370  | 103.5085195 |
| H | 1.9883423  | 1.7222045  | 90.9022998  |
| H | 6.4968347  | 0.3397056  | 94.4678081  |
| H | -1.4495418 | -1.5157291 | 95.0629035  |
| C | 2.9982636  | 1.7356930  | 91.3680300  |
| H | 6.3117198  | 2.2390903  | 96.9933662  |
| H | 3.6532308  | 3.4142156  | 90.1195274  |
| H | -2.1169572 | 0.9713741  | 95.1093495  |
| C | 2.8093998  | 1.3484137  | 92.8306272  |
| C | 6.0927130  | -0.0547733 | 95.4234776  |
| C | 3.5652987  | 3.1543946  | 91.1946644  |
| H | 4.5781564  | 3.2442301  | 91.6403791  |
| C | 3.8960933  | 1.2894364  | 93.7230269  |
| C | -0.4292728 | -1.2572314 | 94.7124339  |
| H | 3.4341536  | -0.3227746 | 90.7250205  |
| C | 1.5390608  | 1.0071448  | 93.3235825  |
| C | 3.8618549  | 0.6954518  | 90.6305705  |
| H | 3.9407131  | 0.9389224  | 89.5507520  |
| H | 0.6747438  | 1.0782609  | 92.6446979  |
| C | 5.4621874  | 2.2611939  | 96.2802550  |
| H | 6.9366086  | -0.1088227 | 96.1417363  |
| H | 5.7346796  | -1.0871900 | 95.2350403  |
| C | 3.7477046  | 0.8562735  | 95.0545050  |
| C | -1.1520415 | 1.1576771  | 94.5987016  |
| C | 1.3339222  | 0.5615139  | 94.6444487  |
| H | 0.2747195  | -1.9944936 | 95.1448687  |
| H | -0.4079404 | -1.3777933 | 93.6088468  |
| C | 4.9659329  | 0.8350476  | 95.9763314  |
| C | 2.4612686  | 0.4510716  | 95.5046779  |
| C | -0.0738914 | 0.1892674  | 95.1088951  |
| H | 4.6640453  | 2.8835773  | 96.7300591  |
| H | -0.8937674 | 2.2128391  | 94.8049923  |
| H | 5.8177257  | 2.7711860  | 95.3598177  |
| H | 2.9205749  | 3.9138522  | 91.6794465  |
| H | -1.3300046 | 1.0502216  | 93.5082569  |
| H | 4.8919533  | 0.6651592  | 91.0436266  |
| H | 4.6471664  | 0.3886211  | 96.9403937  |

|    |            |           |            |
|----|------------|-----------|------------|
| H  | -0.0785060 | 0.2533084 | 96.2169350 |
| H  | 4.8996220  | 1.5783532 | 93.3700547 |
| Zn | 2.5464540  | 6.0042948 | 97.8456843 |
| Br | 4.7823773  | 6.3979094 | 97.5592858 |
| H  | -2.0654452 | 8.8834797 | 95.4489802 |
| Br | -3.5257211 | 3.6588282 | 96.2021111 |
| H  | -2.1252568 | 5.6043850 | 99.1462461 |
| Zn | -1.4520425 | 4.3306877 | 97.0304445 |
| C  | -2.2833960 | 7.8083414 | 97.3440124 |
| C  | -1.7460619 | 8.9207895 | 96.5154648 |
| C  | -1.2535271 | 7.0143363 | 97.7911790 |
| C  | -1.2397041 | 5.7435623 | 98.4995198 |
| C  | -0.0282652 | 7.6588477 | 97.2748322 |
| O  | -0.3135615 | 8.7498033 | 96.5438485 |
| O  | 1.1734697  | 7.3613579 | 97.4279372 |
| H  | -1.9702958 | 9.9420737 | 96.8975118 |
| H  | -0.3175505 | 5.5782707 | 99.0844956 |
| C  | 3.1714281  | 7.5662293 | 94.0453314 |
| C  | 2.0138787  | 6.8934162 | 94.4399363 |
| C  | 2.0461508  | 5.4863444 | 94.6132609 |
| C  | 3.2461718  | 4.7719598 | 94.3870248 |
| C  | 4.4037144  | 5.4566565 | 94.0027733 |
| C  | 4.3654217  | 6.8494064 | 93.8307062 |
| H  | 3.1547844  | 8.6584027 | 93.9143989 |
| H  | 1.0752715  | 7.4361952 | 94.6206008 |
| C  | 0.8738194  | 4.7388194 | 95.0720921 |
| H  | 3.2639711  | 3.6793906 | 94.5260979 |
| H  | 5.3416274  | 4.9036902 | 93.8473829 |
| H  | 5.2787648  | 7.3887115 | 93.5365897 |
| O  | -0.1740024 | 5.2694085 | 95.4731856 |
| H  | -3.3545504 | 7.6305557 | 97.5057640 |
| H  | 0.9808681  | 3.6244688 | 95.0916467 |

### 14c-mi; COSMO

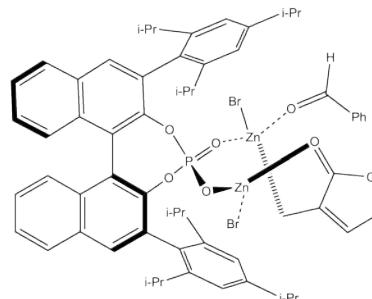

Energy (Hartree) = -11970.04151519

|   |            |            |            |
|---|------------|------------|------------|
| C | 0.5575698  | 0.8857093  | 88.3564317 |
| C | 1.7931112  | 0.3144443  | 88.0462483 |
| C | 1.9223944  | -1.1245153 | 88.1266307 |
| C | 3.1724142  | -1.8056297 | 88.0096999 |
| C | 0.7419965  | -1.9185244 | 88.3694909 |
| C | 0.8438232  | -3.3421757 | 88.3951302 |
| C | -0.4915892 | -1.2684710 | 88.6540992 |
| H | -1.3755688 | -1.8840510 | 88.8793936 |
| C | -0.5892973 | 0.1151833  | 88.7221935 |
| C | 4.6843413  | 2.7481910  | 88.6043172 |
| C | 5.5220877  | 2.3721858  | 87.5552586 |
| H | 6.5524976  | 2.7599865  | 87.5378452 |
| C | 5.0920327  | 1.5249529  | 86.4977767 |
| C | 5.9231505  | 1.2527880  | 85.3690840 |
| C | 3.7885519  | 0.9162547  | 86.5765026 |
| C | 3.3563862  | 0.0938308  | 85.4927806 |
| C | 2.9697685  | 1.1689393  | 87.7355147 |
| C | 3.3732629  | 2.1712754  | 88.6333517 |
| O | 0.4136492  | 2.2670761  | 88.2613747 |
| O | 2.5367096  | 2.5305759  | 89.6854342 |
| P | 1.0656796  | 3.2266893  | 89.4393174 |
| O | 0.3259478  | 3.0308160  | 90.7764635 |

|   |            |            |            |    |            |            |            |
|---|------------|------------|------------|----|------------|------------|------------|
| O | 1.1144784  | 4.6325141  | 88.8411607 | H  | 6.8956536  | 0.9047468  | 91.0919521 |
| C | 2.0689255  | -3.9712934 | 88.2356292 | C  | 5.3230099  | 3.1930292  | 91.0120646 |
| C | 3.2432082  | -3.1911049 | 88.0632379 | C  | 4.0830628  | 6.2884797  | 87.8860030 |
| H | -0.0709556 | -3.9309407 | 88.5672341 | C  | 5.6472094  | 4.9710417  | 89.3336149 |
| H | 2.1372331  | -5.0694063 | 88.2651898 | H  | 7.5684677  | 5.9801663  | 87.5546223 |
| H | 4.0942005  | -1.2220498 | 87.8865682 | H  | 6.6346750  | 7.4206552  | 88.0689366 |
| H | 4.2217039  | -3.6877856 | 87.9774782 | C  | 4.9107670  | 1.7864111  | 91.4466612 |
| C | 4.1788877  | -0.1344925 | 84.3978902 | C  | 5.1964152  | 3.6609363  | 89.6727082 |
| C | 5.4786966  | 0.4379386  | 84.3384285 | C  | 5.4397483  | 5.5679566  | 87.9401646 |
| H | 2.3510129  | -0.3502231 | 85.5263277 | H  | 2.9483834  | 2.4192300  | 92.2014697 |
| H | 3.8194504  | -0.7609649 | 83.5671622 | H  | 3.2580391  | 5.5996420  | 88.1507078 |
| H | 6.1249264  | 0.2420763  | 83.4691680 | H  | 4.2018485  | 2.2697025  | 93.4749379 |
| H | 6.9217904  | 1.7155205  | 85.3276833 | H  | 5.0198324  | 6.9795511  | 93.4573110 |
| C | -1.9743704 | 0.9156877  | 90.6614344 | H  | 4.0465319  | 7.1281109  | 88.6101806 |
| C | -1.8124998 | 0.7973931  | 89.2473834 | H  | 8.0834281  | 4.6823514  | 93.8084109 |
| C | -3.0947021 | 1.6407062  | 91.1483401 | H  | 4.4831297  | 1.2619331  | 90.5697412 |
| C | -2.7908056 | 1.3212121  | 88.3664591 | H  | 5.3849446  | 4.7337884  | 87.2134714 |
| C | -3.9079509 | 1.9936393  | 88.9014215 | H  | 5.9908429  | 3.6725141  | 93.0103600 |
| C | -4.0770119 | 2.1833620  | 90.2792259 | Zn | -1.5512141 | 3.5028421  | 91.1523744 |
| H | -3.2746492 | 1.6872715  | 92.2339958 | Br | -2.2600932 | 4.5126336  | 93.1365500 |
| C | -2.6447492 | 1.1746922  | 86.8556067 | C  | 0.5849695  | 10.4771767 | 85.3102941 |
| H | -4.6572855 | 2.4066883  | 88.2086949 | C  | 0.8255639  | 9.5981711  | 86.3700882 |
| C | -2.3031967 | 2.5215414  | 86.1922070 | C  | 0.5996214  | 8.2114391  | 86.1990478 |
| H | -3.1161118 | 3.2607527  | 86.3376890 | C  | 0.1457796  | 7.7195799  | 84.9529668 |
| H | -2.1497719 | 2.3842119  | 85.1017072 | C  | -0.0920505 | 8.6051915  | 83.8931252 |
| H | -1.3804884 | 2.9522292  | 86.6259921 | C  | 0.1245193  | 9.9827552  | 84.0728830 |
| C | -3.8868960 | 0.5269015  | 86.2196497 | H  | 0.7570486  | 11.5564970 | 85.4400767 |
| H | -1.7893585 | 0.4905196  | 86.6766894 | H  | 1.1872626  | 9.9576940  | 87.3453153 |
| H | -4.7830313 | 1.1754573  | 86.3110775 | C  | 0.8381979  | 7.2670055  | 87.2943943 |
| H | -4.1247486 | -0.4477246 | 86.6922264 | H  | -0.0077401 | 6.6359629  | 84.8211072 |
| H | -3.7173322 | 0.3517140  | 85.1375884 | H  | -0.4429679 | 8.2231924  | 82.9226128 |
| C | -5.2694817 | 2.9450918  | 90.8412232 | H  | -0.0621879 | 10.6792253 | 83.2409654 |
| C | -5.2325108 | 4.4323502  | 90.4414495 | O  | 1.3088830  | 7.5985615  | 88.3988536 |
| H | -6.1191364 | 4.9629681  | 90.8445360 | C  | -1.9741194 | 7.5954611  | 88.1524570 |
| H | -5.2301168 | 4.5574092  | 89.3384963 | C  | -1.6554264 | 6.7628912  | 89.2035766 |
| H | -4.3284652 | 4.9256650  | 90.8498516 | C  | -2.1580256 | 5.4292731  | 88.8007064 |
| C | -6.5986393 | 2.2818357  | 90.4390661 | O  | -2.7973622 | 5.4866973  | 87.6191084 |
| H | -5.1857132 | 2.9015413  | 91.9485226 | C  | -2.7433022 | 6.8420527  | 87.1240321 |
| H | -7.4524567 | 2.8016773  | 90.9196977 | O  | -2.0617253 | 4.3371102  | 89.3796159 |
| H | -6.6288730 | 1.2160323  | 90.7431342 | C  | -0.8916338 | 6.9515761  | 90.4163786 |
| H | -6.7578396 | 2.3250392  | 89.3412744 | H  | -3.7889050 | 7.1982606  | 86.9893060 |
| C | -1.0733453 | 0.1570578  | 91.6396009 | H  | -2.2692324 | 6.8170198  | 86.1163668 |
| C | -0.7440544 | 0.8959879  | 92.9455506 | Zn | 1.0425142  | 6.3378547  | 90.0620791 |
| H | -0.1092657 | 0.2483545  | 93.5833037 | Br | 2.7297472  | 6.1711779  | 91.6718022 |
| H | -1.6478216 | 1.1472901  | 93.5371907 | H  | -1.2401546 | 6.3210308  | 91.2588168 |
| H | -0.1732604 | 1.8264959  | 92.7621642 | H  | -0.8110379 | 8.0086622  | 90.7301853 |
| C | -1.7279276 | -1.2057843 | 91.9540058 | H  | -1.7707000 | 8.6717476  | 88.0840590 |
| H | -0.1123790 | -0.0341559 | 91.1205354 | H  | 0.6269069  | 6.1877942  | 87.0855074 |
| H | -1.0566766 | -1.8180531 | 92.5900094 |    |            |            |            |
| H | -1.9514961 | -1.7838692 | 91.0366076 |    |            |            |            |
| H | -2.6825891 | -1.0626814 | 92.5020744 |    |            |            |            |
| H | 7.2061679  | 7.1973428  | 92.2344483 |    |            |            |            |
| H | 6.6161558  | 1.4016809  | 92.7894950 |    |            |            |            |
| H | 6.4299100  | 6.7790561  | 86.4185711 |    |            |            |            |
| C | 6.9565450  | 6.2348320  | 92.7333909 |    |            |            |            |
| H | 3.4704946  | 0.7958377  | 92.7683280 |    |            |            |            |
| H | 6.3916369  | 7.2541440  | 94.5925371 |    |            |            |            |
| H | 3.8872805  | 6.6971490  | 86.8715981 |    |            |            |            |
| C | 6.3464376  | 5.3335366  | 91.6677510 |    |            |            |            |
| C | 6.1312633  | 0.9600390  | 91.8939329 |    |            |            |            |
| C | 5.9549875  | 6.5427093  | 93.8608474 |    |            |            |            |
| H | 5.6783061  | 5.6207767  | 94.4141757 |    |            |            |            |
| C | 5.8947668  | 4.0409488  | 91.9764111 |    |            |            |            |
| C | 6.5829308  | 6.4834314  | 87.4768924 |    |            |            |            |
| H | 9.0010976  | 5.4587795  | 92.4806922 |    |            |            |            |
| C | 6.2096892  | 5.7732389  | 90.3419768 |    |            |            |            |
| C | 8.2662921  | 5.6470314  | 93.2897840 |    |            |            |            |
| H | 8.7302305  | 6.3379974  | 94.0243056 |    |            |            |            |
| H | 6.5394989  | 6.7942290  | 90.0948918 |    |            |            |            |
| C | 3.8199534  | 1.8231301  | 92.5331383 |    |            |            |            |
| H | 5.8291714  | -0.0761607 | 92.1536151 |    |            |            |            |

### 14c-mi

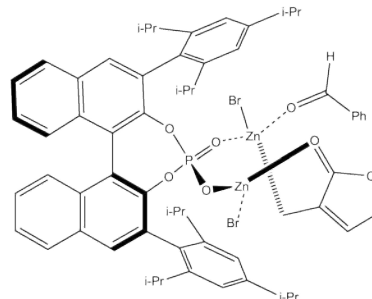

Energy (Hartree) = -11970.02722155

|   |            |            |            |
|---|------------|------------|------------|
| C | 0.5554740  | 0.8844585  | 88.3531793 |
| C | 1.7913115  | 0.3141891  | 88.0415061 |
| C | 1.9232986  | -1.1242745 | 88.1263829 |
| C | 3.1739090  | -1.8033400 | 88.0063910 |
| C | 0.7457409  | -1.9198316 | 88.3770938 |
| C | 0.8511520  | -3.3426519 | 88.4069738 |
| C | -0.4873861 | -1.2706939 | 88.6644663 |
| H | -1.3695589 | -1.8862952 | 88.8970475 |

|   |            |            |            |    |            |            |            |
|---|------------|------------|------------|----|------------|------------|------------|
| C | -0.5884404 | 0.1128552  | 88.7269406 | H  | 3.8699069  | 6.6852100  | 86.8623429 |
| C | 4.6796625  | 2.7519818  | 88.5944638 | C  | 6.3396232  | 5.3341325  | 91.6600974 |
| C | 5.5167713  | 2.3749209  | 87.5454958 | C  | 6.1246096  | 0.9598088  | 91.8784506 |
| H | 6.5470360  | 2.7631472  | 87.5300110 | C  | 5.9383560  | 6.5499474  | 93.8471328 |
| C | 5.0875277  | 1.5264460  | 86.4889611 | H  | 5.6517619  | 5.6304433  | 94.3991905 |
| C | 5.9180682  | 1.2523203  | 85.3609190 | C  | 5.8878354  | 4.0417065  | 91.9669633 |
| C | 3.7850022  | 0.9161945  | 86.5690085 | C  | 6.5615220  | 6.5096887  | 87.4791517 |
| C | 3.3545079  | 0.0903504  | 85.4876265 | H  | 8.9890131  | 5.4494627  | 92.4886041 |
| C | 2.9660807  | 1.1701215  | 87.7274031 | C  | 6.2037432  | 5.7749278  | 90.3349721 |
| C | 3.3686341  | 2.1747266  | 88.6231662 | C  | 8.2506934  | 5.6441503  | 93.2927269 |
| O | 0.4083696  | 2.2642035  | 88.2541998 | H  | 8.7135275  | 6.3349188  | 94.0280725 |
| O | 2.5324566  | 2.5354907  | 89.6743517 | H  | 6.5323051  | 6.7965686  | 90.0901301 |
| P | 1.0585584  | 3.2248857  | 89.4330744 | C  | 3.8153594  | 1.8243611  | 92.5245949 |
| O | 0.3221482  | 3.0162863  | 90.7702957 | H  | 5.8227371  | -0.0763079 | 92.1386099 |
| O | 1.0931143  | 4.6332009  | 88.8406870 | H  | 6.8868790  | 0.9050130  | 91.0746507 |
| C | 2.0761571  | -3.9698281 | 88.2438919 | C  | 5.3169372  | 3.1944988  | 91.0020812 |
| C | 3.2474831  | -3.1880580 | 88.0636640 | C  | 4.0646420  | 6.2697518  | 87.8743709 |
| H | -0.0616360 | -3.9326691 | 88.5854414 | C  | 5.6426008  | 4.9739663  | 89.3256895 |
| H | 2.1465537  | -5.0676706 | 88.2767753 | H  | 7.5565374  | 6.0275731  | 87.5670981 |
| H | 4.0931939  | -1.2173653 | 87.8771466 | H  | 6.5887012  | 7.4484369  | 88.0702772 |
| H | 4.2266150  | -3.6827990 | 87.9748349 | C  | 4.9037839  | 1.7879743  | 91.4358114 |
| C | 4.1772424  | -0.1401004 | 84.3938778 | C  | 5.1916230  | 3.6637076  | 89.6633974 |
| C | 5.4754778  | 0.4341924  | 84.3327382 | C  | 5.4328708  | 5.5719985  | 87.9329979 |
| H | 2.3499917  | -0.3552248 | 85.5238420 | H  | 2.9456052  | 2.4266183  | 92.1997163 |
| H | 3.8189189  | -0.7700540 | 83.5653695 | H  | 3.2491180  | 5.5644919  | 88.1252560 |
| H | 6.1223160  | 0.2370015  | 83.4642978 | H  | 4.1996658  | 2.2659793  | 93.4675223 |
| H | 6.9158968  | 1.7166424  | 85.3183639 | H  | 5.0082726  | 6.9907767  | 93.4369456 |
| C | -1.9787817 | 0.9104791  | 90.6652557 | H  | 4.0087709  | 7.1010616  | 88.6067086 |
| C | -1.8122172 | 0.7944978  | 89.2516064 | H  | 8.0617818  | 4.6818306  | 93.8133070 |
| C | -3.1004228 | 1.6329812  | 91.1495074 | H  | 4.4740188  | 1.2646412  | 90.5591600 |
| C | -2.7859612 | 1.3233603  | 88.3687395 | H  | 5.3969960  | 4.7398340  | 87.2025328 |
| C | -3.9030643 | 1.9962961  | 88.9018562 | H  | 5.9813378  | 3.6731344  | 93.0009507 |
| C | -4.0773403 | 2.1811782  | 90.2796404 | Zn | -1.5345488 | 3.5203120  | 91.1760268 |
| H | -3.2783873 | 1.6863682  | 92.2350113 | Br | -2.2987691 | 4.5122630  | 93.1341566 |
| C | -2.6357357 | 1.1804133  | 86.8576060 | C  | 0.5921329  | 10.4700081 | 85.3236425 |
| H | -4.6483142 | 2.4144217  | 88.2076579 | C  | 0.8261251  | 9.5897118  | 86.3836104 |
| C | -2.2977699 | 2.5287970  | 86.1958502 | C  | 0.5983941  | 8.2038889  | 86.2120210 |
| H | -3.1119679 | 3.2664305  | 86.3426319 | C  | 0.1529263  | 7.7148231  | 84.9624345 |
| H | -2.1448891 | 2.3939045  | 85.1048918 | C  | -0.0778597 | 8.6014907  | 83.9019033 |
| H | -1.3750241 | 2.9596017  | 86.6292345 | C  | 0.1378597  | 9.9784007  | 84.0833990 |
| C | -3.8737261 | 0.5279149  | 86.2185167 | H  | 0.7662958  | 11.5488426 | 85.4552226 |
| H | -1.7773923 | 0.4995913  | 86.6798755 | H  | 1.1859948  | 9.9439628  | 87.3614993 |
| H | -4.7734065 | 1.1715603  | 86.3096769 | C  | 0.8346370  | 7.2593480  | 87.3105602 |
| H | -4.1086430 | -0.4480715 | 86.6894465 | H  | 0.0024047  | 6.6308784  | 84.8288849 |
| H | -3.7032071 | 0.3546905  | 85.1362725 | H  | -0.4214516 | 8.2203318  | 82.9283401 |
| C | -5.2707117 | 2.9437813  | 90.8391814 | H  | -0.0426938 | 10.6755948 | 83.2507977 |
| C | -5.2360148 | 4.4300274  | 90.4361353 | O  | 1.3107468  | 7.5949999  | 88.4110676 |
| H | -6.1261052 | 4.9593807  | 90.8332560 | C  | -1.9285831 | 7.5943531  | 88.1468143 |
| H | -5.2279874 | 4.5531682  | 89.3328957 | C  | -1.6301283 | 6.7661242  | 89.2098637 |
| H | -4.3361259 | 4.9256483  | 90.8504232 | C  | -2.1431285 | 5.4336662  | 88.8109930 |
| C | -6.5987277 | 2.2765984  | 90.4399790 | O  | -2.7777832 | 5.4928073  | 87.6245086 |
| H | -5.1857005 | 2.9055113  | 91.9466019 | C  | -2.7069704 | 6.8433021  | 87.1228175 |
| H | -7.4545832 | 2.7957287  | 90.9177790 | O  | -2.0612884 | 4.3444261  | 89.3932898 |
| H | -6.6273028 | 1.2116748  | 90.7469894 | C  | -0.8770326 | 6.9551175  | 90.4234550 |
| H | -6.7583010 | 2.3142820  | 89.3420250 | H  | -3.7493443 | 7.2105213  | 86.9862385 |
| C | -1.0783766 | 0.1540118  | 91.6460533 | H  | -2.2335565 | 6.8073424  | 86.1146180 |
| C | -0.7418932 | 0.8997843  | 92.9465294 | Zn | 1.0676142  | 6.3332155  | 90.0754901 |
| H | -0.1154981 | 0.2506276  | 93.5910095 | Br | 2.7248423  | 6.1447938  | 91.6921691 |
| H | -1.6417991 | 1.1690980  | 93.5360489 | H  | -1.2154623 | 6.3203018  | 91.2666841 |
| H | -0.1585877 | 1.8211517  | 92.7571395 | H  | -0.7857415 | 8.0104064  | 90.7385283 |
| C | -1.7369232 | -1.2044757 | 91.9699565 | H  | -1.7179941 | 8.6687710  | 88.0762550 |
| H | -0.1195177 | -0.0442506 | 91.1258256 | H  | 0.6285312  | 6.1788284  | 87.1029790 |
| H | -1.0672278 | -1.8169266 | 92.6074191 |    |            |            |            |
| H | -1.9654587 | -1.7867688 | 91.0563730 |    |            |            |            |
| H | -2.6898258 | -1.0558574 | 92.5195809 |    |            |            |            |
| H | 7.2026943  | 7.1956069  | 92.2276716 |    |            |            |            |
| H | 6.6132509  | 1.4001255  | 92.7724831 |    |            |            |            |
| H | 6.4126337  | 6.8021279  | 86.4193856 |    |            |            |            |
| C | 6.9463905  | 6.2352089  | 92.7275629 |    |            |            |            |
| H | 3.4628699  | 0.7974395  | 92.7569839 |    |            |            |            |
| H | 6.3735374  | 7.2593224  | 94.5816951 |    |            |            |            |

14d-ma; COSMO

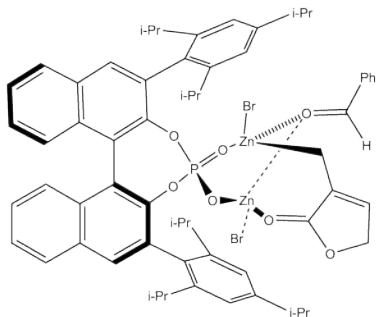

Energy (Hartree) = -11970.04482997

|    |            |            |            |
|----|------------|------------|------------|
| Zn | 1.5527378  | 5.7491232  | 90.2143424 |
| Br | 2.7163363  | 6.4298555  | 92.1140088 |
| H  | -0.5495528 | 10.1362372 | 87.3344410 |
| Br | 3.4055269  | 6.0797948  | 84.9547569 |
| H  | -0.6081144 | 5.3481872  | 86.0050825 |
| Zn | 1.8767187  | 5.3578025  | 86.5875758 |
| C  | -0.9032443 | 8.0931165  | 86.6046828 |
| C  | -1.1781510 | 9.2360527  | 87.5185024 |
| C  | -0.4677973 | 7.0118268  | 87.3245687 |
| C  | -0.0928509 | 5.6526970  | 86.9371581 |
| C  | -0.4215604 | 7.4773598  | 88.7305597 |
| O  | -0.8585183 | 8.7459410  | 88.8356229 |
| O  | -0.0641239 | 6.8764478  | 89.7587797 |
| H  | -2.2421755 | 9.5625986  | 87.5182986 |
| H  | -0.3742783 | 4.9379683  | 87.7361215 |
| H  | -1.0698142 | 8.1347958  | 85.5198484 |
| C  | 3.0077676  | 10.0544953 | 85.9354331 |
| C  | 2.7723285  | 8.9404889  | 86.7444839 |
| C  | 3.5391218  | 8.7554627  | 87.9234398 |
| C  | 4.5354457  | 9.7002805  | 88.2793786 |
| C  | 4.7725612  | 10.8057695 | 87.4582454 |
| C  | 4.0085034  | 10.9804207 | 86.2879747 |
| H  | 2.4176949  | 10.2008416 | 85.0187658 |
| H  | 1.9945178  | 8.2100712  | 86.4849056 |
| C  | 3.3157412  | 7.6273782  | 88.8014690 |
| H  | 5.1216095  | 9.5485892  | 89.1991435 |
| H  | 5.5494243  | 11.5372650 | 87.7251374 |
| H  | 4.1935577  | 11.8535203 | 85.6431822 |
| O  | 2.5304482  | 6.6779874  | 88.5517715 |
| C  | 0.1080700  | 1.0212330  | 89.1629198 |
| C  | 0.8770764  | -0.0811936 | 89.5596064 |
| C  | 0.3449151  | -0.9396638 | 90.5920408 |
| C  | 1.1110207  | -1.9729679 | 91.2118556 |
| C  | -1.0074303 | -0.7284929 | 91.0495397 |
| C  | -1.5549598 | -1.5984486 | 92.0404335 |
| C  | -1.7550784 | 0.3730435  | 90.5457055 |
| H  | -2.7806160 | 0.5297952  | 90.9138274 |
| C  | -1.2074666 | 1.2902865  | 89.6553635 |
| C  | 4.4549001  | 0.5689366  | 88.3068680 |
| C  | 4.8302523  | -0.6998465 | 87.8810829 |
| H  | 5.8401557  | -0.8512913 | 87.4695474 |
| C  | 3.9167556  | -1.7929715 | 87.8789146 |
| C  | 4.2926461  | -3.0625907 | 87.3448680 |
| C  | 2.5677737  | -1.5989388 | 88.3568196 |
| C  | 1.6382984  | -2.6711755 | 88.1997450 |
| C  | 2.2097887  | -0.3259354 | 88.9393625 |
| C  | 3.1507453  | 0.7070934  | 88.8747612 |
| O  | 0.6156568  | 1.8965084  | 88.2037435 |
| O  | 2.8346414  | 1.9444494  | 89.4267703 |
| P  | 1.7956094  | 2.9492339  | 88.6558211 |
| O  | 1.2757812  | 3.8921921  | 89.7540433 |
| O  | 2.3796410  | 3.5581149  | 87.3828505 |
| C  | -0.7929875 | -2.6147418 | 92.5965716 |
| C  | 0.5569596  | -2.7883616 | 92.1892720 |
| H  | -2.5929643 | -1.4321149 | 92.3691163 |

|   |            |            |            |
|---|------------|------------|------------|
| H | -1.2240242 | -3.2738220 | 93.3655656 |
| H | 2.1595325  | -2.1139010 | 90.9155487 |
| H | 1.1724527  | -3.5722280 | 92.6565585 |
| C | 2.0300811  | -3.8874856 | 87.6565571 |
| C | 3.3726580  | -4.0951914 | 87.2417885 |
| H | 0.5936211  | -2.5246109 | 88.5066135 |
| H | 1.2909150  | -4.6950376 | 87.5415984 |
| H | 3.6742514  | -5.0667451 | 86.8214640 |
| H | 5.3284725  | -3.1983838 | 86.9959515 |
| C | -2.1537924 | 3.5555303  | 90.2537131 |
| C | -1.9286287 | 2.5443758  | 89.2713336 |
| C | -2.8050653 | 4.7383744  | 89.8630401 |
| C | -2.3768249 | 2.7435390  | 87.9379324 |
| C | -3.0536291 | 3.9350812  | 87.6120453 |
| C | -3.2737261 | 4.9520312  | 88.5538696 |
| H | -2.9583545 | 5.5305535  | 90.6141786 |
| C | -2.1867560 | 1.6892805  | 86.8487842 |
| H | -3.4040372 | 4.0689930  | 86.5783725 |
| C | -1.3830221 | 2.2288866  | 85.6518371 |
| H | -1.9205909 | 3.0523864  | 85.1365526 |
| H | -1.2126443 | 1.4262280  | 84.9048605 |
| H | -0.3948549 | 2.6084594  | 85.9762328 |
| C | -3.5407745 | 1.1048116  | 86.4043197 |
| H | -1.6040644 | 0.8527678  | 87.2842968 |
| H | -4.1844618 | 1.8807137  | 85.9392376 |
| H | -4.0962601 | 0.6791568  | 87.2646310 |
| H | -3.3940127 | 0.2983342  | 85.6561769 |
| C | -4.0151493 | 6.2462951  | 88.2256693 |
| C | -4.1614406 | 6.5261377  | 86.7254731 |
| H | -4.6021181 | 7.5305188  | 86.5608924 |
| H | -4.8350705 | 5.7904501  | 86.2383769 |
| H | -3.1843920 | 6.4910965  | 86.2040915 |
| C | -5.3931108 | 6.2711215  | 88.9181561 |
| H | -3.4114535 | 7.0734313  | 88.6669463 |
| H | -5.9093189 | 7.2379054  | 88.7432264 |
| H | -5.3037302 | 6.1236015  | 90.0128119 |
| H | -6.0395372 | 5.4601951  | 88.5217821 |
| C | -1.7733764 | 3.3849757  | 91.7264870 |
| C | -0.8931054 | 4.5190986  | 92.2753715 |
| H | -0.7324205 | 4.3951029  | 93.3656588 |
| H | -1.3331685 | 5.5239882  | 92.1143217 |
| H | 0.1079635  | 4.4947019  | 91.8052210 |
| C | -3.0442623 | 3.2117350  | 92.5827585 |
| H | -1.1816873 | 2.4533239  | 91.8205216 |
| H | -2.7806134 | 3.0037029  | 93.6403707 |
| H | -3.6739767 | 2.3763574  | 92.2143289 |
| H | -3.6688385 | 4.1295679  | 92.5636779 |
| H | 7.5038816  | 5.6115716  | 86.1819317 |
| H | 7.7688768  | 2.4779493  | 91.1556233 |
| H | 5.6982731  | 0.2475797  | 83.8603618 |
| C | 7.3342740  | 5.5594880  | 87.2798060 |
| H | 4.9006666  | 2.7584997  | 92.5359069 |
| H | 6.8326696  | 7.7011121  | 87.4039335 |
| H | 3.6068198  | 1.7158156  | 83.7916424 |
| C | 6.6624949  | 4.2211904  | 87.5588786 |
| C | 7.0455093  | 1.6357093  | 91.1383029 |
| C | 6.3856049  | 6.7144852  | 87.6491558 |
| H | 6.1644528  | 6.7046291  | 88.7383296 |
| C | 6.4793230  | 3.7522538  | 88.8720857 |
| C | 6.0867145  | 0.8452838  | 84.7112819 |
| H | 9.3812987  | 4.8739464  | 87.6991595 |
| C | 6.1522223  | 3.4453518  | 86.5070303 |
| C | 8.6987095  | 5.7038071  | 87.9729017 |
| H | 9.1854127  | 6.6591102  | 87.6865797 |
| H | 6.2743317  | 3.8127732  | 85.4756203 |
| C | 5.0369151  | 3.1543393  | 91.5083959 |
| H | 6.9533414  | 1.2485910  | 92.1745112 |
| H | 7.4801656  | 0.8334557  | 90.5077343 |
| C | 5.7979676  | 2.5546903  | 89.1491692 |
| C | 4.0270706  | 2.3324738  | 84.6134354 |
| C | 5.4625313  | 2.2382015  | 86.7248906 |

|   |           |           |            |
|---|-----------|-----------|------------|
| H | 6.7085853 | 0.1788357 | 85.3437084 |
| H | 6.7556458 | 1.6283025 | 84.2961413 |
| C | 5.6753430 | 2.0904119 | 90.5992549 |
| C | 5.2825927 | 1.7903064 | 88.0658661 |
| C | 4.9300610 | 1.4720121 | 85.5126814 |
| H | 4.0437554 | 3.4670306 | 91.1331644 |
| H | 3.1916779 | 2.7641435 | 85.1962377 |
| H | 5.6663497 | 4.0647372 | 91.5891288 |
| H | 5.4289510 | 6.6249827 | 87.0951077 |
| H | 4.5748891 | 3.1788080 | 84.1516594 |
| H | 8.5968547 | 5.7051258 | 89.0783465 |
| H | 5.0125897 | 1.2010557 | 90.6148565 |
| H | 4.3018974 | 0.6400317 | 85.8867719 |
| H | 6.8751280 | 4.3411340 | 89.7147911 |
| H | 3.8449000 | 7.6256242 | 89.7859692 |

|   |            |            |            |
|---|------------|------------|------------|
| H | -2.7807130 | 0.5238188  | 90.9223635 |
| C | -1.2120541 | 1.2811144  | 89.6579614 |
| C | 4.4471200  | 0.5747192  | 88.3031784 |
| C | 4.8267820  | -0.6924364 | 87.8770825 |
| H | 5.8369676  | -0.8381376 | 87.4642628 |
| C | 3.9186825  | -1.7896877 | 87.8761836 |
| C | 4.2990682  | -3.0577676 | 87.3429881 |
| C | 2.5696284  | -1.6017776 | 88.3557694 |
| C | 1.6454683  | -2.6786110 | 88.2012756 |
| C | 2.2063291  | -0.3301509 | 88.9375471 |
| C | 3.1428368  | 0.7069282  | 88.8722017 |
| O | 0.6040758  | 1.8848975  | 88.1976781 |
| O | 2.8211125  | 1.9433441  | 89.4223335 |
| P | 1.7833175  | 2.9416155  | 88.6438283 |
| O | 1.2574295  | 3.8949445  | 89.7286214 |
| O | 2.3691679  | 3.5394332  | 87.3660103 |
| C | -0.7892033 | -2.6232337 | 92.5976222 |
| C | 0.5593727  | -2.7958017 | 92.1874305 |
| H | -2.5895967 | -1.4412684 | 92.3748096 |
| H | -1.2183519 | -3.2825632 | 93.3673896 |
| H | 2.1584953  | -2.1193616 | 90.9101037 |
| H | 1.1764857  | -3.5793403 | 92.6529905 |
| C | 2.0423819  | -3.8933671 | 87.6594702 |
| C | 3.3846252  | -4.0948253 | 87.2426471 |
| H | 0.6009878  | -2.5359546 | 88.5103346 |
| H | 1.3069735  | -4.7046343 | 87.5470612 |
| H | 3.6905104  | -5.0651934 | 86.8228191 |
| H | 5.3349163  | -3.1884869 | 86.9922844 |
| C | -2.1472884 | 3.5492786  | 90.2606896 |
| C | -1.9317718 | 2.5370066  | 89.2777293 |
| C | -2.7931466 | 4.7354461  | 89.8719592 |
| C | -2.3848718 | 2.7378477  | 87.9464736 |
| C | -3.0559784 | 3.9329120  | 87.6229061 |
| C | -3.2660571 | 4.9512233  | 88.5651421 |
| H | -2.9374499 | 5.5291670  | 90.6233189 |
| C | -2.2071214 | 1.6804909  | 86.8582851 |
| H | -3.4111331 | 4.0675617  | 86.5909533 |
| C | -1.4089795 | 2.2121875  | 85.6543538 |
| H | -1.9450198 | 3.0373843  | 85.1400710 |
| H | -1.2484812 | 1.4072411  | 84.9078549 |
| H | -0.4158683 | 2.5857868  | 85.9700114 |
| C | -3.5671915 | 1.1013549  | 86.4259638 |
| H | -1.6252098 | 0.8426092  | 87.2921713 |
| H | -4.2114270 | 1.8787946  | 85.9643883 |
| H | -4.1181022 | 0.6811442  | 87.2916088 |
| H | -3.4309611 | 0.2923804  | 85.6786177 |
| C | -4.0040388 | 6.2485215  | 88.2409205 |
| C | -4.1500226 | 6.5332510  | 86.7415166 |
| H | -4.5904718 | 7.5381958  | 86.5788822 |
| H | -4.8250414 | 5.8004010  | 86.2523016 |
| H | -3.1730976 | 6.4981821  | 86.2200455 |
| C | -5.3819341 | 6.2739620  | 88.9331948 |
| H | -3.3982134 | 7.0733902  | 88.6840733 |
| H | -5.8976896 | 7.2418011  | 88.7624747 |
| H | -5.2929785 | 6.1210902  | 90.0269659 |
| H | -6.0292705 | 5.4650971  | 88.5347023 |
| C | -1.7619944 | 3.3781775  | 91.7321690 |
| C | -0.8590396 | 4.4989044  | 92.2722337 |
| H | -0.7075069 | 4.3875200  | 93.3650536 |
| H | -1.2730963 | 5.5121865  | 92.0952134 |
| H | 0.1448983  | 4.4426758  | 91.8109386 |
| C | -3.0315447 | 3.2282355  | 92.5945556 |
| H | -1.1859566 | 2.4369461  | 91.8267353 |
| H | -2.7671439 | 3.0174064  | 93.6513649 |
| H | -3.6773789 | 2.4035326  | 92.2300970 |
| H | -3.6417162 | 4.1556525  | 92.5777185 |
| H | 7.4694248  | 5.6355637  | 86.1872643 |
| H | 7.7509122  | 2.4928525  | 91.1537066 |
| H | 5.7074096  | 0.2579178  | 83.8629069 |
| C | 7.3088360  | 5.5764775  | 87.2860751 |
| H | 4.8812306  | 2.7584885  | 92.5365987 |

## 14d-ma

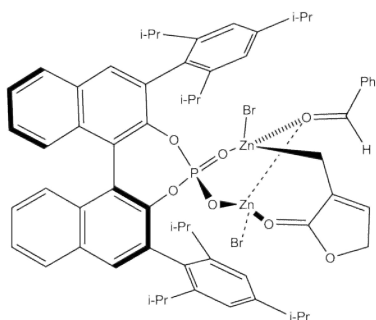

Energy (Hartree) = -11970.03134653

|    |            |            |            |
|----|------------|------------|------------|
| Zn | 1.5464911  | 5.7384363  | 90.2262937 |
| Br | 2.7162412  | 6.4510362  | 92.0989296 |
| H  | -0.4912759 | 10.1208094 | 87.2989007 |
| Br | 3.4239409  | 6.0949373  | 84.9606145 |
| H  | -0.5916133 | 5.3311654  | 85.9574212 |
| Zn | 1.8888645  | 5.3339107  | 86.5595257 |
| C  | -0.8651574 | 8.0840774  | 86.5571026 |
| C  | -1.1343458 | 9.2281127  | 87.4735308 |
| C  | -0.4514138 | 6.9949239  | 87.2782819 |
| C  | -0.0866216 | 5.6347265  | 86.8953640 |
| C  | -0.4139007 | 7.4560613  | 88.6888860 |
| O  | -0.8357896 | 8.7323598  | 88.7907257 |
| O  | -0.0767159 | 6.8471832  | 89.7152974 |
| H  | -2.1945774 | 9.5687249  | 87.4638238 |
| H  | -0.3728442 | 4.9220358  | 87.6938806 |
| H  | -1.0202402 | 8.1283413  | 85.4707000 |
| C  | 3.0556469  | 10.0488012 | 85.9304318 |
| C  | 2.8021676  | 8.9377256  | 86.7391756 |
| C  | 3.5378236  | 8.7620147  | 87.9380345 |
| C  | 4.5196647  | 9.7124968  | 88.3146794 |
| C  | 4.7721377  | 10.8167914 | 87.4967391 |
| C  | 4.0398672  | 10.9819911 | 86.3052513 |
| H  | 2.4938652  | 10.1822472 | 84.9941223 |
| H  | 2.0385607  | 8.1995799  | 86.4606375 |
| C  | 3.3006964  | 7.6297673  | 88.8117899 |
| H  | 5.0837756  | 9.5647292  | 89.2488904 |
| H  | 5.5380184  | 11.5533881 | 87.7810578 |
| H  | 4.2393164  | 11.8522966 | 85.6608276 |
| O  | 2.5195598  | 6.6843902  | 88.5475560 |
| C  | 0.1014333  | 1.0113816  | 89.1604538 |
| C  | 0.8726972  | -0.0893158 | 89.5573725 |
| C  | 0.3430296  | -0.9472907 | 90.5913467 |
| C  | 1.1108508  | -1.9798786 | 91.2096548 |
| C  | -1.0082655 | -0.7369761 | 91.0519588 |
| C  | -1.5523635 | -1.6074197 | 92.0436231 |
| C  | -1.7568270 | 0.3646684  | 90.5504658 |



|   |           |           |            |   |            |            |            |
|---|-----------|-----------|------------|---|------------|------------|------------|
| H | 6.8137398 | 7.7186994 | 87.4293572 | P | 1.8430588  | 2.8789165  | 88.5170418 |
| H | 3.6140838 | 1.7194644 | 83.7774281 | O | 1.3739886  | 3.9610318  | 89.5115933 |
| C | 6.6382488 | 4.2368872 | 87.5619067 | O | 2.5426150  | 3.2912961  | 87.2341182 |
| C | 7.0309557 | 1.6478765 | 91.1353145 | C | -1.2567291 | -2.7590094 | 92.1213594 |
| C | 6.3654866 | 6.7310828 | 87.6689061 | C | 0.1101445  | -2.9665222 | 91.7949465 |
| H | 6.1484625 | 6.7123663 | 88.7589564 | H | -2.9824587 | -1.4769395 | 91.8581511 |
| C | 6.4552714 | 3.7656865 | 88.8739732 | H | -1.7672808 | -3.4450747 | 92.8143035 |
| C | 6.0880597 | 0.8585234 | 84.7152098 | H | 1.8240779  | -2.2893473 | 90.6817596 |
| H | 9.3567655 | 4.8829883 | 87.6846664 | H | 0.6599702  | -3.8042431 | 92.2505969 |
| C | 6.1326639 | 3.4608845 | 86.5084505 | C | 1.9263862  | -3.8824580 | 87.3978760 |
| C | 8.6790882 | 5.7129863 | 87.9690062 | C | 3.3037974  | -4.1495811 | 87.1749309 |
| H | 9.1669167 | 6.6688356 | 87.6862785 | H | 0.4506773  | -2.4711616 | 88.0920803 |
| H | 6.2537442 | 3.8307272 | 85.4779240 | H | 1.1733189  | -4.6428765 | 87.1403859 |
| C | 5.0147337 | 3.1559376 | 91.5095597 | H | 3.6149949  | -5.1207346 | 86.7607267 |
| H | 6.9417766 | 1.2584375 | 92.1708533 | H | 5.3180201  | -3.3586872 | 87.2614670 |
| H | 7.4692619 | 0.8495408 | 90.5026296 | C | -2.0170909 | 3.5924722  | 90.3295419 |
| C | 5.7795565 | 2.5648120 | 89.1487981 | C | -1.9051424 | 2.7010693  | 89.2217990 |
| C | 4.0243095 | 2.3377378 | 84.6028453 | C | -2.6903876 | 4.8124966  | 90.1454025 |
| C | 5.4490568 | 2.2500558 | 86.7235277 | C | -2.4111869 | 3.0812855  | 87.9503505 |
| H | 6.7102353 | 0.1964869 | 85.3518001 | C | -3.0759919 | 4.3184438  | 87.8226294 |
| H | 6.7563601 | 1.6433423 | 84.3029061 | C | -3.2454028 | 5.1924440  | 88.9122510 |
| C | 5.6585389 | 2.0975541 | 90.5980718 | C | -2.2927407 | 2.1698535  | 86.7311865 |
| C | 5.2696991 | 1.7996736 | 88.0635963 | H | -3.5011008 | 4.5878054  | 86.8417986 |
| C | 4.9244505 | 1.4818081 | 85.5091755 | C | -1.4757318 | 2.8279073  | 85.6062808 |
| H | 4.0188361 | 3.4627054 | 91.1372343 | H | -1.9741825 | 3.7397617  | 85.2143831 |
| H | 3.1805794 | 2.7629262 | 85.1779582 | H | -1.3477287 | 2.1344988  | 84.7501088 |
| H | 5.6376760 | 4.0704850 | 91.5926267 | H | -0.4607781 | 3.1085931  | 85.9479077 |
| H | 5.4076944 | 6.6483404 | 87.1158740 | C | -3.6760131 | 1.7091427  | 86.2360403 |
| H | 4.5691467 | 3.1880470 | 84.1451643 | H | -1.7423169 | 1.2600618  | 87.0460741 |
| H | 8.5865514 | 5.7059085 | 89.0751783 | H | -4.2874606 | 2.5652534  | 85.8809295 |
| H | 5.0001221 | 1.2049308 | 90.6117625 | H | -4.2440735 | 1.2024886  | 87.0426774 |
| H | 4.2968343 | 0.6480150 | 85.8803550 | H | -3.5720479 | 0.9993538  | 85.3894984 |
| H | 6.8478838 | 4.3544452 | 89.7182977 | C | -4.0605017 | 6.4768199  | 88.8119682 |
| H | 3.8146271 | 7.6238920 | 89.8052941 | C | -3.6962872 | 7.3504028  | 87.6034855 |

### 14d-mi; COSMO

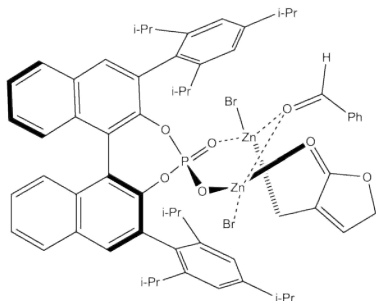

Energy (Hartree) = -11970.04134623

|   |            |            |            |   |           |           |            |
|---|------------|------------|------------|---|-----------|-----------|------------|
| C | 0.0210315  | 1.0328869  | 88.9822747 | C | 6.9647069 | 3.9363572 | 88.5431469 |
| C | 0.7166305  | -0.1243518 | 89.3583305 | C | 6.3822691 | 1.2018103 | 91.9716143 |
| C | 0.0865352  | -1.0155645 | 90.3068659 | C | 7.1035461 | 6.3772161 | 89.2481682 |
| C | 0.7640385  | -2.1178587 | 90.9119001 | H | 7.0839185 | 6.1951145 | 90.3427711 |
| C | -1.2818219 | -0.7694135 | 90.6937903 | C | 6.4472810 | 3.4387646 | 89.7517720 |
| C | -1.9335484 | -1.6739110 | 91.5858569 | C | 7.0699615 | 0.7605523 | 85.4885362 |
| C | -1.9357818 | 0.4101916  | 90.2410296 | H | 9.7233730 | 4.1859558 | 88.4284554 |
| H | -2.9636100 | 0.6101996  | 90.5800568 | C | 6.7185732 | 3.1971938 | 87.3752919 |
| C | -1.2876581 | 1.3564403  | 89.4550190 | C | 9.2158790 | 4.9846100 | 89.0062281 |
| C | 4.4482808  | 0.4043180  | 88.5976325 | H | 9.8252806 | 5.9091380 | 88.9276797 |
| C | 4.8204368  | -0.8722793 | 88.1896354 | H | 7.1302590 | 3.5682241 | 86.4220687 |
| H | 5.8787076  | -1.0783695 | 87.9659470 | C | 4.4397425 | 2.8474141 | 91.9728687 |
| C | 3.8625777  | -1.9065484 | 87.9850302 |   |           |           |            |
| C | 4.2498155  | -3.1757844 | 87.4581233 |   |           |           |            |
| C | 2.4692150  | -1.6544426 | 88.2653474 |   |           |           |            |
| C | 1.5200722  | -2.6669197 | 87.9316993 |   |           |           |            |
| C | 2.0904217  | -0.3866731 | 88.8442774 |   |           |           |            |
| C | 3.0725432  | 0.6068232  | 88.9358518 |   |           |           |            |
| O | 0.5930815  | 1.9076826  | 88.0656261 |   |           |           |            |
| O | 2.7275397  | 1.8551545  | 89.4427874 |   |           |           |            |

|    |            |            |            |   |            |            |            |
|----|------------|------------|------------|---|------------|------------|------------|
| H  | 6.0410029  | 0.7891675  | 92.9438360 | C | -1.9367279 | 0.4175056  | 90.2216200 |
| H  | 6.8912449  | 0.3903205  | 91.4125850 | H | -2.9659299 | 0.6208206  | 90.5545082 |
| C  | 5.6665025  | 2.2722074  | 89.8079064 | C | -1.2816872 | 1.3652191  | 89.4434812 |
| C  | 5.0113758  | 2.1781627  | 85.0023550 | C | 4.4553704  | 0.3994408  | 88.6110740 |
| C  | 5.9446433  | 2.0204296  | 87.3704111 | C | 4.8261523  | -0.8786862 | 88.2073041 |
| H  | 7.5680713  | 0.0938605  | 86.2224309 | H | 5.8854597  | -1.0863715 | 87.9897161 |
| H  | 7.7781529  | 1.5823649  | 85.2523290 | C | 3.8672414  | -1.9106967 | 87.9985496 |
| C  | 5.1940945  | 1.7716547  | 91.1720706 | C | 4.2530393  | -3.1815229 | 87.4757322 |
| C  | 5.3894298  | 1.5655694  | 88.6021294 | C | 2.4732126  | -1.6537874 | 88.2697986 |
| C  | 5.7361021  | 1.3021926  | 86.0358099 | C | 1.5232553  | -2.6631359 | 87.9302770 |
| H  | 3.5930617  | 3.2585455  | 91.3897023 | C | 2.0947934  | -0.3853671 | 88.8473786 |
| H  | 3.9947738  | 2.4332258  | 85.3577513 | C | 3.0789100  | 0.6054874  | 88.9447376 |
| H  | 5.1053888  | 3.6884480  | 92.2587978 | O | 0.6076332  | 1.9176612  | 88.0679578 |
| H  | 6.0551192  | 6.5123831  | 88.9162853 | O | 2.7358672  | 1.8532230  | 89.4537831 |
| H  | 5.5571586  | 3.1208366  | 84.7887376 | P | 1.8584186  | 2.8831564  | 88.5276966 |
| H  | 9.2067334  | 4.6741223  | 90.0723434 | O | 1.3875990  | 3.9636395  | 89.5233102 |
| H  | 4.4907453  | 0.9317777  | 91.0030332 | O | 2.5684870  | 3.2995413  | 87.2524302 |
| H  | 5.0796405  | 0.4293560  | 86.2146178 | C | -1.2776668 | -2.7594675 | 92.0947770 |
| H  | 6.6512114  | 3.9821907  | 90.6874699 | C | 0.0903250  | -2.9684391 | 91.7766973 |
| Zn | 1.1887522  | 5.8436400  | 89.1286682 | H | -2.9981501 | -1.4725092 | 91.8253340 |
| Br | -0.2489398 | 7.5214138  | 89.8302592 | H | -1.7943920 | -3.4468033 | 92.7817732 |
| C  | 0.7765181  | 7.8902652  | 83.2090518 | H | 1.8128767  | -2.2902328 | 90.6774234 |
| C  | 0.9235793  | 7.2933120  | 84.4620199 | H | 0.6355610  | -3.8088944 | 92.2326832 |
| C  | -0.2152686 | 6.7814538  | 85.1356423 | C | 1.9289166  | -3.8802488 | 87.4007710 |
| C  | -1.4938971 | 6.8689275  | 84.5321284 | C | 3.3062638  | -4.1522928 | 87.1874566 |
| C  | -1.6306552 | 7.4479890  | 83.2671664 | H | 0.4538949  | -2.4626677 | 88.0839950 |
| C  | -0.4964111 | 7.9606566  | 82.6101064 | H | 1.1748664  | -4.6381254 | 87.1389849 |
| H  | 1.6555770  | 8.2927034  | 82.6843985 | H | 3.6171438  | -5.1247789 | 86.7762960 |
| C  | -0.0949725 | 6.1671379  | 86.4405309 | H | 5.3218837  | -3.3678046 | 87.2858903 |
| H  | -2.3711143 | 6.4698023  | 85.0626728 | C | -2.0169668 | 3.5951529  | 90.3266843 |
| H  | -2.6198489 | 7.5063254  | 82.7898793 | C | -1.8969057 | 2.7112995  | 89.2138178 |
| H  | -0.6055894 | 8.4231074  | 81.6169276 | C | -2.6935466 | 4.8134356  | 90.1470689 |
| O  | 1.0066701  | 5.8945009  | 86.9805003 | C | -2.3968132 | 3.0981861  | 87.9422678 |
| C  | 4.1249526  | 8.4387668  | 86.1807937 | C | -3.0666744 | 4.3331394  | 87.8202297 |
| C  | 4.0969548  | 7.1773723  | 86.7151313 | C | -3.2454534 | 5.1986511  | 88.9145041 |
| C  | 3.4072801  | 7.3231602  | 88.0152537 | C | -2.2663635 | 2.1966566  | 86.7169533 |
| O  | 3.0694459  | 8.6000822  | 88.2518598 | H | -3.4880952 | 4.6064058  | 86.8388979 |
| C  | 3.4794186  | 9.3996004  | 87.1227148 | C | -1.4415226 | 2.8645326  | 85.6037557 |
| O  | 3.1218312  | 6.4163563  | 88.8191959 | H | -1.9366659 | 3.7797435  | 85.2153047 |
| C  | 4.4825251  | 5.8567728  | 86.2227529 | H | -1.3051085 | 2.1799120  | 84.7421911 |
| H  | 4.1560564  | 10.1998705 | 87.4960035 | H | -0.4284712 | 3.1408442  | 85.9538375 |
| H  | 2.5685730  | 9.8933041  | 86.7159351 | C | -3.6443040 | 1.7356615  | 86.2078838 |
| Zn | 2.8746548  | 4.6970673  | 85.8265206 | H | -1.7159660 | 1.2860898  | 87.0294098 |
| Br | 1.7652505  | 4.0321770  | 83.8503958 | H | -4.2562080 | 2.5918629  | 85.8538004 |
| H  | 4.9729976  | 5.2555656  | 87.0157067 | H | -4.2177722 | 1.2223398  | 87.0062170 |
| H  | 5.1310037  | 5.9081251  | 85.3275458 | H | -3.5322939 | 1.0324672  | 85.3569894 |
| H  | 1.9099814  | 7.2287383  | 84.9444270 | C | -4.0687301 | 6.4784787  | 88.8239460 |
| H  | 4.5420940  | 8.7361190  | 85.2090585 | C | -3.7358036 | 7.3495247  | 87.6052466 |
| H  | -1.0363315 | 5.9329958  | 86.9936406 | H | -4.3233227 | 8.2902226  | 87.6252415 |
| H  | -2.7855334 | 5.5046157  | 90.9964509 | H | -3.9885128 | 6.8349468  | 86.6537166 |
|    |            |            |            | H | -2.6619733 | 7.6238965  | 87.5913256 |
|    |            |            |            | C | -5.5726450 | 6.1456282  | 88.8764212 |
|    |            |            |            | H | -3.8202089 | 7.0751311  | 89.7284421 |
|    |            |            |            | H | -6.1874242 | 7.0699296  | 88.8812824 |
|    |            |            |            | H | -5.8227863 | 5.5591683  | 89.7830971 |
|    |            |            |            | H | -5.8736720 | 5.5405123  | 87.9951755 |
|    |            |            |            | C | -1.4519661 | 3.2656227  | 91.7104706 |
|    |            |            |            | C | -0.5533483 | 4.3829900  | 92.2684583 |
|    |            |            |            | H | -0.1199969 | 4.0730454  | 93.2416464 |
|    |            |            |            | H | -1.1076505 | 5.3289221  | 92.4345468 |
|    |            |            |            | H | 0.2819717  | 4.5982133  | 91.5770064 |
|    |            |            |            | C | -2.5812629 | 2.9292251  | 92.7030334 |
|    |            |            |            | H | -0.8148995 | 2.3642834  | 91.6082964 |
|    |            |            |            | H | -2.1647845 | 2.6493737  | 93.6927749 |
|    |            |            |            | H | -3.2068288 | 2.0868037  | 92.3462783 |
|    |            |            |            | H | -3.2514860 | 3.8014647  | 92.8527009 |
|    |            |            |            | H | 7.8262382  | 5.5218832  | 87.4237897 |
|    |            |            |            | H | 7.1489775  | 1.9837811  | 92.1874199 |
|    |            |            |            | H | 6.9212296  | 0.2162334  | 84.5399533 |
|    |            |            |            | C | 7.7772251  | 5.2222742  | 88.4943785 |
|    |            |            |            | H | 4.0454272  | 2.4137977  | 92.9239037 |

### 14d-mi

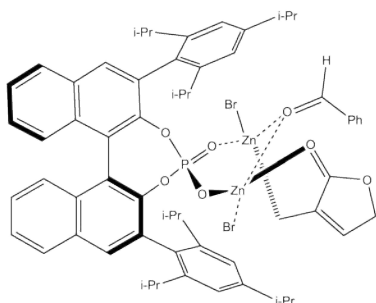

Energy (Hartree) = -11970.02821901

|   |            |            |            |
|---|------------|------------|------------|
| C | 0.0291760  | 1.0407774  | 88.9773448 |
| C | 0.7190379  | -0.1199703 | 89.3540127 |
| C | 0.0808692  | -1.0124984 | 90.2958856 |
| C | 0.7518226  | -2.1180592 | 90.9017307 |
| C | -1.2892229 | -0.7650047 | 90.6747543 |
| C | -1.9480474 | -1.6712344 | 91.5590309 |

|    |            |            |            |
|----|------------|------------|------------|
| H  | 7.6490949  | 7.3272502  | 89.0940680 |
| H  | 4.8554565  | 1.6129500  | 84.0667339 |
| C  | 6.9636746  | 3.9351935  | 88.5480389 |
| C  | 6.3921308  | 1.1988949  | 91.9777870 |
| C  | 7.1102305  | 6.3730811  | 89.2667886 |
| H  | 7.1142272  | 6.1875765  | 90.3608918 |
| C  | 6.4482886  | 3.4391729  | 89.7577126 |
| C  | 7.0866743  | 0.8012038  | 85.4681760 |
| H  | 9.7175895  | 4.1902649  | 88.3877708 |
| C  | 6.7218358  | 3.1907687  | 87.3829240 |
| C  | 9.2197359  | 4.9846818  | 88.9792106 |
| H  | 9.8274292  | 5.9100510  | 88.8974434 |
| H  | 7.1318394  | 3.5607555  | 86.4285008 |
| C  | 4.4501260  | 2.8455009  | 91.9854388 |
| H  | 6.0543112  | 0.7867316  | 92.9513440 |
| H  | 6.8986915  | 0.3873909  | 91.4169858 |
| C  | 5.6722150  | 2.2699855  | 89.8171173 |
| C  | 4.9644865  | 2.1423198  | 85.0351416 |
| C  | 5.9537605  | 2.0105769  | 87.3809326 |
| H  | 7.6287121  | 0.1562296  | 86.1901037 |
| H  | 7.7577078  | 1.6479258  | 85.2129363 |
| C  | 5.2021219  | 1.7701837  | 91.1822389 |
| C  | 5.3978569  | 1.5592610  | 88.6135353 |
| C  | 5.7462092  | 1.2901921  | 86.0470561 |
| H  | 3.6032004  | 3.2592858  | 91.4047946 |
| H  | 3.9414980  | 2.3424020  | 85.4069795 |
| H  | 5.1163258  | 3.6855130  | 92.2729511 |
| H  | 6.0542778  | 6.5061615  | 88.9588616 |
| H  | 5.4620750  | 3.1126385  | 84.8265736 |
| H  | 9.2293768  | 4.6654665  | 90.0425711 |
| H  | 4.4978111  | 0.9309006  | 91.0142334 |
| H  | 5.1279386  | 0.3918281  | 86.2345486 |
| H  | 6.6492173  | 3.9859861  | 90.6919312 |
| Zn | 1.1816110  | 5.8440276  | 89.1404420 |
| Br | -0.2693623 | 7.5182987  | 89.8053956 |
| C  | 0.7713162  | 7.8390209  | 83.1800700 |
| C  | 0.9253931  | 7.2541583  | 84.4386402 |
| C  | -0.2141520 | 6.7874321  | 85.1413403 |
| C  | -1.5001518 | 6.9051102  | 84.5608217 |
| C  | -1.6448018 | 7.4726848  | 83.2917477 |
| C  | -0.5092066 | 7.9414670  | 82.6054357 |
| H  | 1.6530163  | 8.2020446  | 82.6316990 |
| C  | -0.0869795 | 6.1836413  | 86.4530795 |
| H  | -2.3766591 | 6.5401276  | 85.1161856 |
| H  | -2.6411358 | 7.5552943  | 82.8330479 |
| H  | -0.6239835 | 8.3927935  | 81.6076833 |
| O  | 1.0150218  | 5.8979482  | 86.9805907 |
| C  | 4.1092893  | 8.4151000  | 86.1579272 |
| C  | 4.1003233  | 7.1605353  | 86.7093933 |
| C  | 3.3981053  | 7.3123488  | 88.0048915 |
| O  | 3.0360618  | 8.5879964  | 88.2194704 |
| C  | 3.4353131  | 9.3759763  | 87.0819848 |
| O  | 3.1225727  | 6.4136272  | 88.8173345 |
| C  | 4.5077093  | 5.8407749  | 86.2408681 |
| H  | 4.0898422  | 10.1988626 | 87.4473140 |
| H  | 2.5151195  | 9.8416919  | 86.6616791 |
| Zn | 2.9099531  | 4.6685652  | 85.8145671 |
| Br | 1.7983158  | 4.0525546  | 83.8389133 |
| H  | 4.9779524  | 5.2473818  | 87.0511129 |
| H  | 5.1741576  | 5.8845402  | 85.3586733 |
| H  | 1.9178983  | 7.1649696  | 84.9032435 |
| H  | 4.5290130  | 8.7049109  | 85.1851368 |
| H  | -1.0258539 | 5.9724175  | 87.0196991 |
| H  | -2.7927093 | 5.5009310  | 91.0013739 |

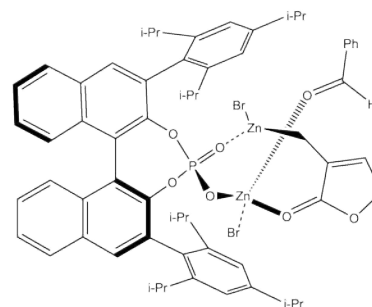

Energy (Hartree) = -11970.05099434

|    |            |            |            |
|----|------------|------------|------------|
| Zn | 0.2397668  | 5.8683202  | 88.9829512 |
| Br | -0.5245686 | 7.7397933  | 90.1389522 |
| H  | 2.3424574  | 7.8011837  | 84.9115250 |
| Br | 1.3109886  | 0.4055935  | 85.0028242 |
| H  | -1.1937631 | 3.9514411  | 84.8235547 |
| Zn | 0.8981798  | 2.6822836  | 85.3458068 |
| C  | 0.9779658  | 6.3807809  | 83.9418749 |
| C  | 1.2588936  | 7.5899458  | 84.7671234 |
| C  | 0.3041436  | 5.4517357  | 84.6874999 |
| C  | -0.1786027 | 4.0989680  | 84.3996127 |
| C  | 0.1686896  | 6.0539126  | 86.0311799 |
| O  | 0.6959778  | 7.2932854  | 86.0626838 |
| O  | -0.3435477 | 5.5438343  | 87.0411061 |
| H  | 0.7798180  | 8.5197813  | 84.3888710 |
| H  | -0.1986020 | 3.8835461  | 83.3143386 |
| H  | 1.2785684  | 6.2866159  | 82.8896888 |
| C  | 5.4027729  | 7.3106974  | 85.7662380 |
| C  | 4.3675693  | 6.9270967  | 86.6224230 |
| C  | 3.8426657  | 7.8635558  | 87.5467745 |
| C  | 4.3784700  | 9.1695378  | 87.6212759 |
| C  | 5.4307246  | 9.5397322  | 86.7739141 |
| C  | 5.9356750  | 8.6131845  | 85.8438035 |
| H  | 5.8071988  | 6.5935947  | 85.0364821 |
| H  | 3.9457866  | 5.9110619  | 86.5991479 |
| C  | 2.7051559  | 7.4973104  | 88.3884190 |
| H  | 3.9609698  | 9.8881308  | 88.3444020 |
| H  | 5.8561050  | 10.5527472 | 86.8304023 |
| H  | 6.7564031  | 8.9072147  | 85.1715060 |
| O  | 2.2010776  | 6.3652794  | 88.3672369 |
| C  | -0.2073160 | 0.9465509  | 89.2849824 |
| C  | 0.6849476  | -0.0932719 | 89.5597303 |
| C  | 0.3476336  | -1.0049656 | 90.6276388 |
| C  | 1.2429471  | -2.0128915 | 91.0980299 |
| C  | -0.9366905 | -0.8781176 | 91.2771261 |
| C  | -1.2915800 | -1.8007036 | 92.3071231 |
| C  | -1.8055776 | 0.1951017  | 90.9231243 |
| H  | -2.7665475 | 0.2960174  | 91.4500934 |
| C  | -1.4431916 | 1.1440002  | 89.9763351 |
| C  | 4.0997251  | 0.8922996  | 88.1080360 |
| C  | 4.5156369  | -0.3125011 | 87.5525861 |
| H  | 5.5182499  | -0.3785873 | 87.1035148 |
| C  | 3.6678773  | -1.4546720 | 87.5071078 |
| C  | 4.0746430  | -2.6484301 | 86.8392313 |
| C  | 2.3606465  | -1.3965891 | 88.1136189 |
| C  | 1.4956452  | -2.5213347 | 87.9651106 |
| C  | 1.9625769  | -0.1930879 | 88.7994483 |
| C  | 2.8100799  | 0.9179219  | 88.7197307 |
| O  | 0.0910075  | 1.8399888  | 88.2626412 |
| O  | 2.4068397  | 2.1230159  | 89.2988940 |
| P  | 1.2649252  | 2.9764406  | 88.4835747 |
| O  | 0.8234263  | 4.0677837  | 89.4695968 |
| O  | 1.7022531  | 3.3738887  | 87.0721311 |
| C  | -0.4098486 | -2.7903121 | 92.7157208 |
| C  | 0.8739994  | -2.8832707 | 92.1149612 |
| H  | -2.2789808 | -1.6988775 | 92.7844971 |

14j-ma; COSMO

|   |            |            |            |
|---|------------|------------|------------|
| H | -0.6949397 | -3.4913252 | 93.5150208 |
| H | 2.2422968  | -2.0924773 | 90.6488193 |
| H | 1.5857065  | -3.6484513 | 92.4609862 |
| C | 1.9129532  | -3.6605634 | 87.2911061 |
| C | 3.2183163  | -3.7340856 | 86.7350660 |
| H | 0.4781526  | -2.4716718 | 88.3770902 |
| H | 1.2227777  | -4.5108337 | 87.1793446 |
| H | 3.5399349  | -4.6452506 | 86.2077976 |
| H | 5.0791956  | -2.6819797 | 86.3886745 |
| C | -2.1397396 | 3.4809515  | 90.6149508 |
| C | -2.2123180 | 2.3966255  | 89.6959671 |
| C | -2.7360211 | 4.7055866  | 90.2537195 |
| C | -2.9030524 | 2.5457715  | 88.4634506 |
| C | -3.4792928 | 3.7892805  | 88.1512077 |
| C | -3.3986285 | 4.8882300  | 89.0261582 |
| H | -2.6822773 | 5.5560435  | 90.9502818 |
| C | -3.0810181 | 1.3647061  | 87.5114238 |
| H | -4.0134499 | 3.9019604  | 87.1938943 |
| C | -2.5921530 | 1.6591562  | 86.0868080 |
| H | -3.1688247 | 2.4779427  | 85.6080407 |
| H | -2.6844218 | 0.7606681  | 85.4434303 |
| H | -1.5240912 | 1.9478288  | 86.0950629 |
| C | -4.5458730 | 0.8868739  | 87.5190764 |
| H | -2.4649237 | 0.5271281  | 87.8988411 |
| H | -5.2273611 | 1.6771545  | 87.1396653 |
| H | -4.8762802 | 0.6235169  | 88.5444454 |
| H | -4.6724336 | -0.0078962 | 86.8748157 |
| C | -4.0465861 | 6.2251092  | 88.6844248 |
| C | -3.4579477 | 6.8526385  | 87.4091149 |
| H | -3.9552651 | 7.8191561  | 87.1846168 |
| H | -3.5941213 | 6.1901680  | 86.5285216 |
| H | -2.3739282 | 7.0431718  | 87.5277000 |
| C | -5.5777786 | 6.0909855  | 88.5904175 |
| H | -3.8161332 | 6.9150566  | 89.5250135 |
| H | -6.0507968 | 7.0793788  | 88.4136615 |
| H | -6.0035776 | 5.6667415  | 89.5222710 |
| H | -5.8725726 | 5.4240013  | 87.7529430 |
| C | -1.4929172 | 3.3305143  | 91.9923941 |
| C | -0.6200726 | 4.5209097  | 92.4185495 |
| H | -0.1561134 | 4.3137518  | 93.4048422 |
| H | -1.2005418 | 5.4605744  | 92.5187545 |
| H | 0.1929074  | 4.6974461  | 91.6896483 |
| C | -2.5806689 | 3.0516786  | 93.0500504 |
| H | -0.8289783 | 2.4429364  | 91.9521860 |
| H | -2.1260792 | 2.8726523  | 94.0467108 |
| H | -3.1935565 | 2.1661055  | 92.7878850 |
| H | -3.2699455 | 3.9175927  | 93.1399971 |
| H | 7.7019620  | 5.9000530  | 86.9089944 |
| H | 7.2979870  | 2.1698264  | 91.4580166 |
| H | 5.1003592  | 1.1761984  | 83.7095171 |
| C | 7.7403203  | 5.4900990  | 87.9423482 |
| H | 4.3219600  | 2.4881250  | 92.5588069 |
| H | 8.0823159  | 7.4860438  | 88.7798763 |
| H | 3.3718401  | 3.0713877  | 83.9002808 |
| C | 6.7418321  | 4.3400921  | 87.9970942 |
| C | 6.5373207  | 1.3869730  | 91.2547314 |
| C | 7.3830577  | 6.6338628  | 88.9062364 |
| H | 7.4467113  | 6.3085479  | 89.9654314 |
| C | 6.4061647  | 3.7202900  | 89.2129990 |
| C | 5.6091885  | 1.5481737  | 84.6228680 |
| H | 9.4494307  | 4.1892182  | 87.4621189 |
| C | 6.1504558  | 3.8376838  | 86.8258723 |
| C | 9.1742465  | 4.9822435  | 88.1864404 |
| H | 9.9109356  | 5.8074105  | 88.0932442 |
| H | 6.3977564  | 4.3158184  | 85.8638775 |
| C | 4.5796872  | 2.9836299  | 91.5997634 |
| H | 6.3116702  | 0.8822067  | 92.2169624 |
| H | 6.9964804  | 0.6407158  | 90.5747547 |
| C | 5.5364595  | 2.6170202  | 89.2791763 |
| C | 3.9646204  | 3.4653469  | 84.7539850 |
| C | 5.2556574  | 2.7502920  | 86.8357371 |

|   |           |           |            |
|---|-----------|-----------|------------|
| H | 6.0515185 | 0.6751413 | 85.1422963 |
| H | 6.4450517 | 2.2079877 | 84.3065151 |
| C | 5.2577889 | 1.9864754 | 90.6424836 |
| C | 4.9684348 | 2.1120583 | 88.0757978 |
| C | 4.6147410 | 2.3008546 | 85.5241678 |
| H | 3.6464420 | 3.3821186 | 91.1562256 |
| H | 3.2893266 | 4.0487479 | 85.4110743 |
| H | 5.2470863 | 3.8390390 | 91.8357041 |
| H | 6.3543598 | 7.0051376 | 88.7281962 |
| H | 4.7143430 | 4.1653425 | 84.3276105 |
| H | 9.2733211 | 4.5537622 | 89.2059306 |
| H | 4.5520098 | 1.1454554 | 90.4912013 |
| H | 3.7962975 | 1.5969855 | 85.7761787 |
| H | 6.8489801 | 4.0984490 | 90.1482748 |
| H | 2.2638465 | 8.2929605 | 89.0435033 |

### 14j-ma

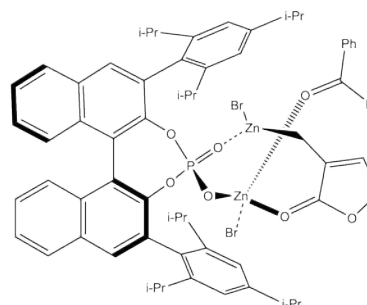

Energy (Hartree) = -11970.03813894

|    |            |            |            |
|----|------------|------------|------------|
| Zn | 0.1878177  | 5.8463869  | 89.0341560 |
| Br | -0.5339325 | 7.7498830  | 90.1505391 |
| H  | 2.3504679  | 7.7761043  | 84.9404869 |
| Br | 1.3494363  | 0.4134026  | 84.9750660 |
| H  | -1.2004883 | 3.9426422  | 84.8792557 |
| Zn | 0.8989795  | 2.6653016  | 85.3458523 |
| C  | 0.9721219  | 6.3671831  | 83.9690627 |
| C  | 1.2648433  | 7.5722316  | 84.7980731 |
| C  | 0.2943918  | 5.4401213  | 84.7141756 |
| C  | -0.1974041 | 4.0931673  | 84.4295251 |
| C  | 0.1652765  | 6.0408070  | 86.0611117 |
| O  | 0.7048867  | 7.2774469  | 86.0931760 |
| O  | -0.3517175 | 5.5353482  | 87.0677249 |
| H  | 0.7903005  | 8.5073956  | 84.4251627 |
| H  | -0.2418205 | 3.8792008  | 83.3449075 |
| H  | 1.2664900  | 6.2724731  | 82.9153096 |
| C  | 5.3636796  | 7.2722441  | 85.8017958 |
| C  | 4.3371624  | 6.8935497  | 86.6711622 |
| C  | 3.7932931  | 7.8474228  | 87.5651852 |
| C  | 4.3025108  | 9.1648171  | 87.5980164 |
| C  | 5.3467302  | 9.5305586  | 86.7389652 |
| C  | 5.8698122  | 8.5864350  | 85.8374360 |
| H  | 5.7811611  | 6.5387006  | 85.0964721 |
| H  | 3.9361365  | 5.8685744  | 86.6796264 |
| C  | 2.6568229  | 7.4828550  | 88.4143793 |
| H  | 3.8697892  | 9.8968024  | 88.2986563 |
| H  | 5.7516467  | 10.5532292 | 86.7640598 |
| H  | 6.6842790  | 8.8762790  | 85.1556868 |
| O  | 2.1789419  | 6.3423992  | 88.4248224 |
| C  | -0.2029191 | 0.9437329  | 89.2683680 |
| C  | 0.6877368  | -0.0971265 | 89.5435039 |
| C  | 0.3501341  | -1.0068806 | 90.6128459 |
| C  | 1.2422004  | -2.0186135 | 91.0802912 |
| C  | -0.9309270 | -0.8736091 | 91.2671192 |
| C  | -1.2854289 | -1.7936043 | 92.2988333 |
| C  | -1.7955121 | 0.2036176  | 90.9160532 |
| H  | -2.7525528 | 0.3122129  | 91.4486457 |

|   |            |            |            |   |           |           |            |
|---|------------|------------|------------|---|-----------|-----------|------------|
| C | -1.4343614 | 1.1488769  | 89.9653885 | H | 3.4012597 | 3.0483637 | 83.8864522 |
| C | 4.1054194  | 0.8914282  | 88.1021920 | C | 6.7451074 | 4.3411459 | 87.9973227 |
| C | 4.5239600  | -0.3129497 | 87.5481905 | C | 6.5191046 | 1.3979622 | 91.2595040 |
| H | 5.5282079  | -0.3768085 | 87.1025929 | C | 7.3898531 | 6.6359865 | 88.9051055 |
| C | 3.6776140  | -1.4555581 | 87.4986447 | H | 7.4480901 | 6.3127868 | 89.9650878 |
| C | 4.0867350  | -2.6485079 | 86.8318670 | C | 6.3975978 | 3.7286293 | 89.2131838 |
| C | 2.3680879  | -1.3984117 | 88.0999817 | C | 5.6420845 | 1.5405722 | 84.6213616 |
| C | 1.5043448  | -2.5233183 | 87.9481366 | H | 9.4522132 | 4.1813606 | 87.4733875 |
| C | 1.9666911  | -0.1958381 | 88.7850579 | C | 6.1657353 | 3.8306874 | 86.8239423 |
| C | 2.8135797  | 0.9160008  | 88.7088942 | C | 9.1779748 | 4.9771736 | 88.1945898 |
| O | 0.0972439  | 1.8343075  | 88.2433964 | H | 9.9186451 | 5.7989625 | 88.1032345 |
| O | 2.4090045  | 2.1205067  | 89.2875939 | H | 6.4251074 | 4.2997338 | 85.8604276 |
| P | 1.2652089  | 2.9747546  | 88.4761180 | C | 4.5629587 | 2.9992727 | 91.5937648 |
| O | 0.8148872  | 4.0511455  | 89.4741746 | H | 6.2895306 | 0.8959707 | 92.2221550 |
| O | 1.7027600  | 3.3865799  | 87.0684671 | H | 6.9792491 | 0.6496022 | 90.5828603 |
| C | -0.4075129 | -2.7870857 | 92.7042273 | C | 5.5295063 | 2.6242361 | 89.2776337 |
| C | 0.8727496  | -2.8866501 | 92.0983971 | C | 3.9869243 | 3.4487661 | 84.7417139 |
| H | -2.2702271 | -1.6862682 | 92.7802878 | C | 5.2704515 | 2.7439551 | 86.8313573 |
| H | -0.6929951 | -3.4861561 | 93.5050127 | H | 6.0882411 | 0.6723648 | 85.1452076 |
| H | 2.2388462  | -2.1029329 | 90.6263161 | H | 6.4757825 | 2.2034668 | 84.3056030 |
| H | 1.5819299  | -3.6554501 | 92.4413686 | C | 5.2430242 | 1.9988271 | 90.6416197 |
| C | 1.9250579  | -3.6616779 | 87.2758102 | C | 4.9727517 | 2.1120731 | 88.0721040 |
| C | 3.2317779  | -3.7341462 | 86.7244205 | C | 4.6398153 | 2.2892303 | 85.5167933 |
| H | 0.4854504  | -2.4729878 | 88.3562145 | H | 3.6327368 | 3.3999634 | 91.1463083 |
| H | 1.2354801  | -4.5118249 | 87.1605981 | H | 3.3034182 | 4.0282390 | 85.3940064 |
| H | 3.5554596  | -4.6443344 | 86.1969390 | H | 5.2307163 | 3.8534992 | 91.8328502 |
| H | 5.0922300  | -2.6805888 | 86.3835325 | H | 6.3629718 | 7.0109277 | 88.7242466 |
| C | -2.1181987 | 3.4895946  | 90.6062593 | H | 4.7348338 | 4.1532076 | 84.3186415 |
| C | -2.1973836 | 2.4057072  | 89.6874977 | H | 9.2715758 | 4.5491221 | 89.2145464 |
| C | -2.7049158 | 4.7186285  | 90.2434717 | H | 4.5364119 | 1.1588329 | 90.4895064 |
| C | -2.8888715 | 2.5583583  | 88.4559249 | H | 3.8225725 | 1.5819889 | 85.7631836 |
| C | -3.4538506 | 3.8063158  | 88.1415840 | H | 6.8310674 | 4.1119520 | 90.1506684 |
| C | -3.3653289 | 4.9056019  | 89.0150723 | H | 2.1898945 | 8.2883701 | 89.0409867 |
| H | -2.6505269 | 5.5676106  | 90.9417376 |   |           |           |            |
| C | -3.0861773 | 1.3734081  | 87.5123297 |   |           |           |            |
| H | -3.9895850 | 3.9211833  | 87.1853712 |   |           |           |            |
| C | -2.5966380 | 1.6459006  | 86.0838863 |   |           |           |            |
| H | -3.1558934 | 2.4745801  | 85.6013042 |   |           |           |            |
| H | -2.7129840 | 0.7458051  | 85.4470007 |   |           |           |            |
| H | -1.5215886 | 1.9068724  | 86.0841221 |   |           |           |            |
| C | -4.5584771 | 0.9193160  | 87.5288669 |   |           |           |            |
| H | -2.4826569 | 0.5294563  | 87.9055790 |   |           |           |            |
| H | -5.2290326 | 1.7160314  | 87.1437594 |   |           |           |            |
| H | -4.8902772 | 0.6726968  | 88.5577099 |   |           |           |            |
| H | -4.7017668 | 0.0201495  | 86.8944507 |   |           |           |            |
| C | -4.0124152 | 6.2442284  | 88.6780757 |   |           |           |            |
| C | -3.4349265 | 6.8733748  | 87.3987898 |   |           |           |            |
| H | -3.9422333 | 7.8344418  | 87.1738707 |   |           |           |            |
| H | -3.5678265 | 6.2081037  | 86.5197527 |   |           |           |            |
| H | -2.3532093 | 7.0772551  | 87.5145661 |   |           |           |            |
| C | -5.5444686 | 6.1108545  | 88.5986612 |   |           |           |            |
| H | -3.7729951 | 6.9337940  | 89.5163309 |   |           |           |            |
| H | -6.0192730 | 7.0996031  | 88.4292522 |   |           |           |            |
| H | -5.9611037 | 5.6836796  | 89.5330535 |   |           |           |            |
| H | -5.8485057 | 5.4459970  | 87.7629066 |   |           |           |            |
| C | -1.4822549 | 3.3344468  | 91.9882450 |   |           |           |            |
| C | -0.5928087 | 4.5113642  | 92.4177320 |   |           |           |            |
| H | -0.1545748 | 4.3076363  | 93.4163095 |   |           |           |            |
| H | -1.1515555 | 5.4662204  | 92.4927838 |   |           |           |            |
| H | 0.2415055  | 4.6585052  | 91.7066019 |   |           |           |            |
| C | -2.5840478 | 3.0780007  | 93.0370620 |   |           |           |            |
| H | -0.8335260 | 2.4354582  | 91.9571612 |   |           |           |            |
| H | -2.1418559 | 2.8917890  | 94.0378647 |   |           |           |            |
| H | -3.2117680 | 2.2042504  | 92.7704434 |   |           |           |            |
| H | -3.2582164 | 3.9561758  | 93.1201697 |   |           |           |            |
| H | 7.7135456  | 5.8973560  | 86.9104784 |   |           |           |            |
| H | 7.2812634  | 2.1790538  | 91.4637096 |   |           |           |            |
| H | 5.1380503  | 1.1613537  | 83.7086422 |   |           |           |            |
| C | 7.7464764  | 5.4888939  | 87.9450045 |   |           |           |            |
| H | 4.2986587  | 2.5062392  | 92.5520843 |   |           |           |            |
| H | 8.0928296  | 7.4854734  | 88.7811782 |   |           |           |            |

#### 14j-mi; COSMO

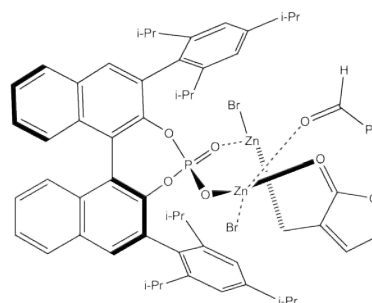

Energy (Hartree) = -11970.04530024

|    |            |           |            |
|----|------------|-----------|------------|
| Zn | 2.1457746  | 5.7852994 | 90.0315622 |
| Br | 3.3419816  | 6.2323828 | 91.9648647 |
| C  | -0.0169652 | 5.9454900 | 85.9045792 |
| C  | 0.0356956  | 6.2247945 | 87.2722085 |
| C  | -0.0881784 | 7.5615683 | 87.7177193 |
| C  | -0.3111030 | 8.6041060 | 86.7853104 |
| C  | -0.3252869 | 8.3205308 | 85.4138776 |
| C  | -0.1651125 | 6.9925171 | 84.9748150 |
| H  | 0.0521973  | 4.9086532 | 85.5462143 |
| H  | 0.1443742  | 5.4175237 | 88.0094196 |
| C  | 0.0483208  | 7.8893585 | 89.1329575 |
| H  | -0.4440963 | 9.6368312 | 87.1457229 |
| H  | -0.4683927 | 9.1306424 | 84.6832729 |
| H  | -0.1672812 | 6.7559370 | 83.8997282 |
| O  | 0.5677837  | 7.1632836 | 89.9973392 |
| C  | 3.8377083  | 8.4136597 | 85.7341759 |
| C  | 3.9057457  | 7.1321332 | 86.2077236 |
| C  | 3.3038918  | 7.1851220 | 87.5538016 |
| O  | 2.9326215  | 8.4346295 | 87.8837185 |
| C  | 3.2208030  | 9.3014220 | 86.7630928 |
| O  | 3.1248530  | 6.2217991 | 88.3114131 |

|    |            |            |            |   |            |           |            |
|----|------------|------------|------------|---|------------|-----------|------------|
| C  | 4.3735833  | 5.8584926  | 85.6543047 | C | -1.4392241 | 3.5604120 | 91.6714451 |
| H  | 3.8887206  | 10.1150999 | 87.1214769 | C | -0.4495923 | 4.6153651 | 92.1893354 |
| H  | 2.2594239  | 9.7624349  | 86.4436512 | H | -0.1759855 | 4.4071829 | 93.2436407 |
| Zn | 2.9011807  | 4.5103471  | 85.3773833 | H | -0.8579736 | 5.6457025 | 92.1489672 |
| Br | 1.6611267  | 3.7814849  | 83.5051729 | H | 0.4870758  | 4.5932389 | 91.6028716 |
| H  | 5.0057200  | 5.3222419  | 86.3944303 | C | -2.6584702 | 3.4409261 | 92.6076451 |
| H  | 4.9331095  | 5.9939739  | 84.7092420 | H | -0.9067617 | 2.5890825 | 91.6953649 |
| H  | 4.1791920  | 8.7758687  | 84.7552671 | H | -2.3387626 | 3.1916326 | 93.6406535 |
| C  | 0.0726050  | 1.1627079  | 88.9705101 | H | -3.3607580 | 2.6537588 | 92.2654827 |
| C  | 0.8058887  | 0.0174684  | 89.3002934 | H | -3.2251850 | 4.3949749 | 92.6492789 |
| C  | 0.2703017  | -0.8530395 | 90.3239926 | H | 8.0135224  | 5.6080139 | 87.4901361 |
| C  | 1.0040106  | -1.9440848 | 90.8812782 | H | 7.2088983  | 1.8022682 | 91.9126416 |
| C  | -1.0519969 | -0.5922750 | 90.8424778 | H | 7.0463809  | 0.8662538 | 84.0620140 |
| C  | -1.6069721 | -1.4706215 | 91.8215784 | C | 7.6771273  | 5.3803257 | 88.5259857 |
| C  | -1.7602857 | 0.5671801  | 90.4160597 | H | 4.1251410  | 2.0700083 | 92.7495592 |
| H  | -2.7570038 | 0.7658329  | 90.8391745 | H | 7.2669669  | 7.4894810 | 88.9847698 |
| C  | -1.2014976 | 1.4836269  | 89.5339575 | H | 4.5620242  | 1.5392029 | 84.0383160 |
| C  | 4.4839301  | 0.4911128  | 88.2836782 | C | 6.9416011  | 4.0473813 | 88.4703249 |
| C  | 4.8113688  | -0.7958391 | 87.8722048 | C | 6.4704195  | 1.0185493 | 91.6419340 |
| H  | 5.8589103  | -1.0396243 | 87.6372556 | C | 6.7356119  | 6.5153262 | 88.9707426 |
| C  | 3.8211700  | -1.8088736 | 87.7149475 | H | 6.3246237  | 6.3342585 | 89.9857676 |
| C  | 4.1544956  | -3.0904406 | 87.1816826 | C | 6.4196323  | 3.4620032 | 89.6370596 |
| C  | 2.4521435  | -1.5324559 | 88.0797204 | C | 7.1743179  | 1.4843576 | 84.9740279 |
| C  | 1.4695730  | -2.5365008 | 87.8290403 | H | 9.6169636  | 4.5055006 | 89.0848036 |
| C  | 2.1270679  | -0.2525158 | 88.6640948 | C | 6.7659722  | 3.3608303 | 87.2569622 |
| C  | 3.1222529  | 0.7320455  | 88.6625732 | C | 8.9297733  | 5.3096189 | 89.4173877 |
| O  | 0.5647527  | 2.0288078  | 88.0015143 | H | 9.4849698  | 6.2702544 | 89.3942257 |
| O  | 2.8298587  | 1.9956228  | 89.1583474 | H | 7.2075447  | 3.7909458 | 86.3438254 |
| P  | 1.8323113  | 3.0162256  | 88.3456699 | C | 4.4899320  | 2.6009988 | 91.8462014 |
| O  | 1.4305807  | 4.0691917  | 89.3917769 | H | 6.1620407  | 0.5060817 | 92.5769700 |
| O  | 2.3696422  | 3.4571121  | 86.9958275 | H | 6.9867592  | 0.2785510 | 90.9968182 |
| C  | -0.8795273 | -2.5443405 | 92.3120830 | C | 5.6898884  | 2.2633903 | 89.6073012 |
| C  | 0.4445416  | -2.7672605 | 91.8493574 | C | 4.7084614  | 2.0704815 | 85.0005669 |
| H  | -2.6224156 | -1.2643944 | 92.1951515 | C | 6.0392647  | 2.1559571 | 87.1666867 |
| H  | -1.3162230 | -3.2098814 | 93.0722483 | H | 8.0287908  | 1.0760630 | 85.5509639 |
| H  | 2.0337920  | -2.1264915 | 90.5459982 | H | 7.4512314  | 2.5049056 | 84.6367036 |
| H  | 1.0371217  | -3.5962561 | 92.2656542 | C | 5.2490326  | 1.6320274 | 90.9277187 |
| C  | 1.8224645  | -3.7646098 | 87.2858546 | C | 5.4499476  | 1.6303227 | 88.3525588 |
| C  | 3.1779166  | -4.0533723 | 86.9738066 | C | 5.8792414  | 1.4793854 | 85.8020998 |
| H  | 0.4166714  | -2.3230977 | 88.0614539 | H | 3.6165361  | 3.0437232 | 91.3321259 |
| H  | 1.0440734  | -4.5182616 | 87.0915839 | H | 3.7591205  | 2.0004916 | 85.5670591 |
| H  | 3.4476796  | -5.0340510 | 86.5530682 | H | 5.1284820  | 3.4388296 | 92.1930307 |
| H  | 5.2051413  | -3.2932930 | 86.9205573 | H | 5.8716355  | 6.6016344 | 88.2843464 |
| C  | -1.9029322 | 3.8041783  | 90.2337207 | H | 4.9096287  | 3.1357728 | 84.7491203 |
| C  | -1.8428662 | 2.7989695  | 89.2232350 | H | 8.6600982  | 5.1073069 | 90.4749128 |
| C  | -2.4579832 | 5.0527913  | 89.9037766 | H | 4.5638922  | 0.7922030 | 90.6939440 |
| C  | -2.3462753 | 3.0673200  | 87.9222894 | H | 5.6215478  | 0.4187671 | 85.9844655 |
| C  | -2.9037444 | 4.3323492  | 87.6516983 | H | 6.5804172  | 3.9583209 | 90.6068056 |
| C  | -2.9700733 | 5.3423334  | 88.6253268 | H | -0.3414664 | 8.8892891 | 89.4547487 |
| H  | -2.4974039 | 5.8365792  | 90.6783593 |   |            |           |            |
| C  | -2.3576411 | 2.0039505  | 86.8249068 |   |            |           |            |
| H  | -3.2948615 | 4.5267295  | 86.6422303 |   |            |           |            |
| C  | -1.5885703 | 2.4395736  | 85.5662087 |   |            |           |            |
| H  | -2.0355100 | 3.3427296  | 85.1005413 |   |            |           |            |
| H  | -1.6043414 | 1.6357517  | 84.8018824 |   |            |           |            |
| H  | -0.5278145 | 2.6560469  | 85.7955455 |   |            |           |            |
| C  | -3.8026929 | 1.5873465  | 86.4890879 |   |            |           |            |
| H  | -1.8491510 | 1.1029143  | 87.2244084 |   |            |           |            |
| H  | -4.3797314 | 2.4348579  | 86.0630105 |   |            |           |            |
| H  | -4.3408328 | 1.2349786  | 87.3926404 |   |            |           |            |
| H  | -3.8102898 | 0.7673103  | 85.7414783 |   |            |           |            |
| C  | -3.6102643 | 6.7038338  | 88.3689313 |   |            |           |            |
| C  | -3.7425429 | 7.0709111  | 86.8866017 |   |            |           |            |
| H  | -4.1020857 | 8.1140588  | 86.7772620 |   |            |           |            |
| H  | -4.4759038 | 6.4171451  | 86.3699051 |   |            |           |            |
| H  | -2.7764203 | 6.9847573  | 86.3519862 |   |            |           |            |
| C  | -4.9765385 | 6.7966365  | 89.0786241 |   |            |           |            |
| H  | -2.9408141 | 7.4588255  | 88.8436309 |   |            |           |            |
| H  | -5.4198059 | 7.8070626  | 88.9587440 |   |            |           |            |
| H  | -4.8888010 | 6.5856398  | 90.1631435 |   |            |           |            |
| H  | -5.6855966 | 6.0579574  | 88.6496192 |   |            |           |            |

### 14j-mi

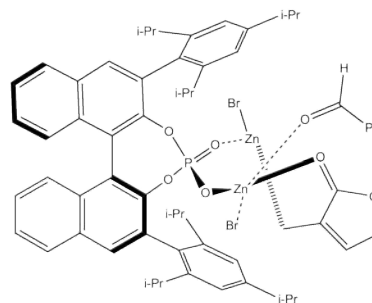

Energy (Hartree) = -11970.03104863

|    |            |           |            |
|----|------------|-----------|------------|
| Zn | 2.1887010  | 5.7800784 | 90.0503038 |
| Br | 3.4088290  | 6.2406180 | 91.9506727 |
| C  | -0.0277521 | 5.9151703 | 85.9208488 |
| C  | 0.0335063  | 6.2076671 | 87.2854739 |
| C  | -0.0798705 | 7.5488368 | 87.7188744 |
| C  | -0.3052495 | 8.5826402 | 86.7779256 |
| C  | -0.3308921 | 8.2859388 | 85.4095887 |

|    |            |            |            |   |            |           |            |
|----|------------|------------|------------|---|------------|-----------|------------|
| C  | -0.1766212 | 6.9531725  | 84.9821171 | H | -1.8672244 | 1.1073363 | 87.2361702 |
| H  | 0.0420466  | 4.8759163  | 85.5698976 | H | -4.3947528 | 2.4480619 | 86.0778074 |
| H  | 0.1476329  | 5.4086122  | 88.0307986 | H | -4.3579477 | 1.2551565 | 87.4124996 |
| C  | 0.0756923  | 7.8860242  | 89.1311718 | H | -3.8356060 | 0.7767824 | 85.7618047 |
| H  | -0.4305585 | 9.6196531  | 87.1297470 | C | -3.6120296 | 6.7121864 | 88.3813089 |
| H  | -0.4774023 | 9.0893698  | 84.6720071 | C | -3.7506934 | 7.0803671 | 86.8998203 |
| H  | -0.1792828 | 6.7024386  | 83.9102136 | H | -4.1122169 | 8.1229748 | 86.7914415 |
| O  | 0.5939488  | 7.1636312  | 89.9952058 | H | -4.4862210 | 6.4267338 | 86.3862586 |
| C  | 3.8584162  | 8.3547102  | 85.6757974 | H | -2.7874320 | 6.9946287 | 86.3601818 |
| C  | 3.9262530  | 7.0843788  | 86.1795721 | C | -4.9754889 | 6.8020926 | 89.0963223 |
| C  | 3.3134259  | 7.1673363  | 87.5220544 | H | -2.9413565 | 7.4683024 | 88.8532270 |
| O  | 2.9358658  | 8.4266971  | 87.8171805 | H | -5.4225914 | 7.8112271 | 88.9796767 |
| C  | 3.2295726  | 9.2644737  | 86.6794013 | H | -4.8834522 | 6.5888974 | 90.1798853 |
| O  | 3.1301693  | 6.2259917  | 88.3010570 | H | -5.6840220 | 6.0616888 | 88.6700311 |
| C  | 4.3966206  | 5.8006322  | 85.6609944 | C | -1.4168176 | 3.5703845 | 91.6708455 |
| H  | 3.8912719  | 10.0900076 | 87.0241247 | C | -0.4392409 | 4.6337471 | 92.1937782 |
| H  | 2.2677242  | 9.7128948  | 86.3415425 | H | -0.1547330 | 4.4183588 | 93.2435096 |
| Zn | 2.9042633  | 4.4737855  | 85.3509447 | H | -0.8616025 | 5.6588748 | 92.1692890 |
| Br | 1.6315953  | 3.7966786  | 83.5013067 | H | 0.4941171  | 4.6331144 | 91.6022191 |
| H  | 4.9905356  | 5.2613770  | 86.4291555 | C | -2.6316724 | 3.4310319 | 92.6100497 |
| H  | 4.9866005  | 5.9133825  | 84.7317459 | H | -0.8726277 | 2.6052386 | 91.6864077 |
| H  | 4.2075736  | 8.6927149  | 84.6911324 | H | -2.3065566 | 3.1797516 | 93.6407912 |
| C  | 0.0757038  | 1.1747069  | 88.9669460 | H | -3.3268669 | 2.6387898 | 92.2657610 |
| C  | 0.8063660  | 0.0253051  | 89.2887060 | H | -3.2094143 | 4.3780221 | 92.6585898 |
| C  | 0.2690823  | -0.8510086 | 90.3065981 | H | 8.0675064  | 5.5942457 | 87.5396016 |
| C  | 1.0003261  | -1.9476640 | 90.8554808 | H | 7.1958961  | 1.7954511 | 91.9208361 |
| C  | -1.0519704 | -0.5910865 | 90.8280412 | H | 7.0473064  | 0.9529595 | 84.0390802 |
| C  | -1.6076251 | -1.4751075 | 91.8008696 | C | 7.6866622  | 5.3845947 | 88.5640345 |
| C  | -1.7575340 | 0.5725216  | 90.4096727 | H | 4.1106308  | 2.0534132 | 92.7565760 |
| H  | -2.7536955 | 0.7714198  | 90.8338712 | H | 7.2719917  | 7.4996959 | 88.9914832 |
| C  | -1.1976710 | 1.4932873  | 89.5333413 | H | 4.5163500  | 1.4621914 | 84.0945210 |
| C  | 4.4856038  | 5.028424   | 88.2804646 | C | 6.9468334  | 4.0543398 | 88.4977574 |
| C  | 4.8127321  | -0.7826995 | 87.8650094 | C | 6.4583829  | 1.0132235 | 91.6439410 |
| H  | 5.8615417  | -1.0260677 | 87.6351906 | C | 6.7325899  | 6.5306087 | 88.9507312 |
| C  | 3.8230668  | -1.7945448 | 87.6994936 | H | 6.2615769  | 6.3585739 | 89.9409295 |
| C  | 4.1564230  | -3.0738990 | 87.1622706 | C | 6.4096143  | 3.4692545 | 89.6568993 |
| C  | 2.4532687  | -1.5190744 | 88.0612226 | C | 7.1610947  | 1.5824847 | 84.9449778 |
| C  | 1.4711143  | -2.5211700 | 87.8032193 | H | 9.5932837  | 4.5062803 | 89.2222359 |
| C  | 2.1277126  | -0.2426224 | 88.6522665 | C | 6.7822904  | 3.3708068 | 87.2808829 |
| C  | 3.1231852  | 0.7412812  | 88.6589031 | C | 8.9009646  | 5.3239005 | 89.5072835 |
| O  | 0.5672829  | 2.0475820  | 88.0045372 | H | 9.4657056  | 6.2788801 | 89.4853546 |
| O  | 2.8301386  | 2.0003340  | 89.1640535 | H | 7.2380367  | 3.8007937 | 86.3751391 |
| P  | 1.8393767  | 3.0280136  | 88.3523299 | C | 4.4755148  | 2.5913439 | 91.8575966 |
| O  | 1.4400106  | 4.0809658  | 89.4003893 | H | 6.1499397  | 0.4940360 | 92.5751485 |
| O  | 2.3846541  | 3.4745852  | 87.0087774 | H | 6.9767705  | 0.2789224 | 90.9942356 |
| C  | -0.8830143 | -2.5539201 | 92.2827074 | C | 5.6815897  | 2.2698770 | 89.6175177 |
| C  | 0.4394915  | -2.7764722 | 91.8172803 | C | 4.6687987  | 2.0128263 | 85.0447016 |
| H  | -2.6220721 | -1.2686250 | 92.1769485 | C | 6.0508556  | 2.1703094 | 87.1791271 |
| H  | -1.3208075 | -3.2237443 | 93.0383772 | H | 8.0600125  | 1.2381559 | 85.4950462 |
| H  | 2.0292039  | -2.1294782 | 90.5175382 | H | 7.3561600  | 2.6172428 | 84.5938337 |
| H  | 1.0304950  | -3.6099162 | 92.2267145 | C | 5.2370241  | 1.6305309 | 90.9329025 |
| C  | 1.8248278  | -3.7469453 | 87.2564674 | C | 5.4513217  | 1.6416720 | 88.3589553 |
| C  | 3.1804578  | -4.0351611 | 86.9474591 | C | 5.8958199  | 1.4947310 | 85.8125236 |
| H  | 0.4182151  | -2.3070373 | 88.0344692 | H | 3.6010652  | 3.0358963 | 91.3472180 |
| H  | 1.0465580  | -4.4992473 | 87.0569526 | H | 3.7414784  | 1.9125561 | 85.6415992 |
| H  | 3.4511430  | -5.0141233 | 86.5235001 | H | 5.1097860  | 3.4289044 | 92.2122478 |
| H  | 5.2076878  | -3.2764927 | 86.9033609 | H | 5.9120548  | 6.6237706 | 88.2136354 |
| C  | -1.8897858 | 3.8158008  | 90.2364512 | H | 4.8133812  | 3.0817758 | 84.7688615 |
| C  | -1.8389008 | 2.8096415  | 89.2269054 | H | 8.5877810  | 5.1492939 | 90.5574578 |
| C  | -2.4467440 | 5.0639069  | 89.9088528 | H | 4.5537000  | 0.7911604 | 90.6922178 |
| C  | -2.3517946 | 3.0756962  | 87.9295463 | H | 5.7100606  | 0.4190544 | 85.9957547 |
| C  | -2.9101734 | 4.3406073  | 87.6614057 | H | 6.5584210  | 3.9641469 | 90.6291327 |
| C  | -2.9685832 | 5.3515051  | 88.6341756 | H | -0.3004877 | 8.8956843 | 89.4459309 |
| H  | -2.4798392 | 5.8485215  | 90.6829629 |   |            |           |            |
| C  | -2.3719476 | 2.0096959  | 86.8348155 |   |            |           |            |
| H  | -3.3091116 | 4.5333399  | 86.6547145 |   |            |           |            |
| C  | -1.6039455 | 2.4358712  | 85.5723970 |   |            |           |            |
| H  | -2.0427073 | 3.3431759  | 85.1070011 |   |            |           |            |
| H  | -1.6315440 | 1.6324910  | 84.8082334 |   |            |           |            |
| H  | -0.5391586 | 2.6388887  | 85.7948511 |   |            |           |            |
| C  | -3.8203920 | 1.5998335  | 86.5058452 |   |            |           |            |

14l-ma; COSMO

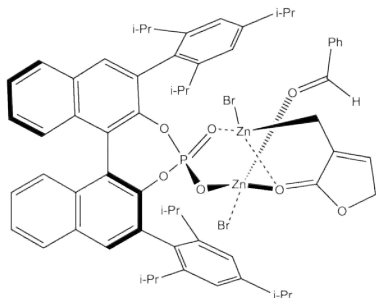

Energy (Hartree) = -11970.03764648

|   |            |            |            |
|---|------------|------------|------------|
| C | -0.0211714 | 0.9714213  | 89.2722938 |
| C | 0.8417985  | 0.0331720  | 89.8440123 |
| C | 0.4206797  | -0.6094359 | 91.0671343 |
| C | 1.2840600  | -1.4358357 | 91.8468758 |
| C | -0.9273229 | -0.3935566 | 91.5380369 |
| C | -1.3699356 | -1.0714377 | 92.7138997 |
| C | -1.7754653 | 0.5311092  | 90.8608969 |
| H | -2.7966460 | 0.6849209  | 91.2414014 |
| C | -1.3250304 | 1.2831554  | 89.7830463 |
| C | 4.2934580  | 0.5545382  | 88.2230698 |
| C | 4.7086255  | -0.7615381 | 88.0540983 |
| H | 5.7110152  | -0.9593595 | 87.6446677 |
| C | 3.8548794  | -1.8633883 | 88.3389425 |
| C | 4.2642017  | -3.2031254 | 88.0631616 |
| C | 2.5342948  | -1.6189175 | 88.8664257 |
| C | 1.6554337  | -2.7350682 | 89.0150311 |
| C | 2.1443825  | -0.2643727 | 89.1853678 |
| C | 3.0104549  | 0.7754954  | 88.8141253 |
| O | 0.3727280  | 1.6108382  | 88.1042361 |
| O | 2.6602157  | 2.0945467  | 89.0757765 |
| P | 1.4750681  | 2.8233412  | 88.1825833 |
| O | 0.9703269  | 3.9590225  | 89.0817816 |
| O | 1.9110603  | 3.1035131  | 86.7526317 |
| C | -0.5136375 | -1.8948469 | 93.4303623 |
| C | 0.8297852  | -2.0615432 | 93.0004842 |
| H | -2.4049233 | -0.9092233 | 93.0541418 |
| H | -0.8668481 | -2.4039751 | 94.3401459 |
| H | 2.3272688  | -1.5696248 | 91.5281231 |
| H | 1.5184520  | -2.6883532 | 93.5875207 |
| C | 2.0748910  | -4.0243192 | 88.7165028 |
| C | 3.3963310  | -4.2673583 | 88.2547125 |
| H | 0.6263704  | -2.5653224 | 89.3593801 |
| H | 1.3732229  | -4.8644551 | 88.8327416 |
| H | 3.7203795  | -5.2951841 | 88.0308178 |
| H | 5.2808580  | -3.3715368 | 87.6741870 |
| C | -2.1910642 | 3.6475581  | 89.9727858 |
| C | -2.0326163 | 2.4596338  | 89.1928412 |
| C | -2.5742482 | 4.8266424  | 89.3085522 |
| C | -2.3686377 | 2.4621438  | 87.8129602 |
| C | -2.7551326 | 3.6691789  | 87.2028037 |
| C | -2.8259210 | 4.8718926  | 87.9217618 |
| H | -2.6682991 | 5.7588370  | 89.8845816 |
| C | -2.3877224 | 1.1717323  | 86.9955175 |
| H | -2.9834865 | 3.6661489  | 86.1281452 |
| C | -1.6824700 | 1.2916544  | 85.6359473 |
| H | -2.2169266 | 1.9785922  | 84.9483552 |
| H | -1.6349870 | 0.2997259  | 85.1404696 |
| H | -0.6518425 | 1.6780646  | 85.7486559 |
| C | -3.8413623 | 0.6831111  | 86.8336377 |
| H | -1.8533655 | 0.3942777  | 87.5796136 |
| H | -4.4454681 | 1.4202997  | 86.2639271 |
| H | -4.3309598 | 0.5372523  | 87.8182835 |
| H | -3.8753811 | -0.2809647 | 86.2841509 |
| C | -3.1240397 | 6.2078028  | 87.2484311 |
| C | -1.8070563 | 6.9617147  | 86.9681295 |
| H | -2.0079047 | 7.9491235  | 86.5014440 |

|    |            |            |            |
|----|------------|------------|------------|
| H  | -1.1650442 | 6.3769299  | 86.2769638 |
| H  | -1.2411074 | 7.1428329  | 87.9035668 |
| C  | -3.9579645 | 6.0875891  | 85.9653874 |
| H  | -3.7058429 | 6.8117994  | 87.9810352 |
| H  | -4.2441430 | 7.0936124  | 85.5965001 |
| H  | -4.8868272 | 5.5042388  | 86.1298117 |
| H  | -3.3810231 | 5.5956804  | 85.1549109 |
| C  | -1.9511983 | 3.6579338  | 91.4898779 |
| C  | -0.4597913 | 3.6946663  | 91.8782458 |
| H  | -0.3480612 | 3.5739472  | 92.9758474 |
| H  | -0.0110943 | 4.6694606  | 91.5992951 |
| H  | 0.1271185  | 2.9011525  | 91.3796322 |
| C  | -2.7125786 | 4.7741378  | 92.2222066 |
| H  | -2.3531438 | 2.6997816  | 91.8770425 |
| H  | -2.6281184 | 4.6307032  | 93.3189271 |
| H  | -3.7897845 | 4.7811372  | 91.9591133 |
| H  | -2.2940765 | 5.7753649  | 91.9912089 |
| H  | 8.3487788  | 4.3503059  | 85.4093698 |
| H  | 7.7328926  | 2.6696322  | 90.7941897 |
| H  | 5.1228559  | -0.5843893 | 83.9191049 |
| C  | 7.9423711  | 4.7535695  | 86.3636309 |
| H  | 4.8552680  | 3.3870810  | 91.9714617 |
| H  | 7.9319112  | 6.8164911  | 85.5980157 |
| H  | 3.4172624  | 1.2448341  | 83.5197995 |
| C  | 6.9557417  | 3.7095017  | 86.8805671 |
| C  | 6.9487170  | 1.8882941  | 90.8813715 |
| C  | 7.2242104  | 6.0727435  | 86.0201719 |
| H  | 6.7573406  | 6.5197135  | 86.9219865 |
| C  | 6.6929360  | 3.5219669  | 88.2488593 |
| C  | 5.6447675  | 0.0612177  | 84.6553936 |
| H  | 9.6567306  | 4.0443030  | 87.5449508 |
| C  | 6.2597837  | 2.8987489  | 85.9659408 |
| C  | 9.1349692  | 4.9914408  | 87.3005699 |
| H  | 9.8681263  | 5.6787689  | 86.8316502 |
| H  | 6.4427616  | 3.0456216  | 84.8885924 |
| C  | 5.0451029  | 3.5814508  | 90.8954389 |
| H  | 6.7945008  | 1.6882001  | 91.9620167 |
| H  | 7.3427953  | 0.9632272  | 90.4135151 |
| C  | 5.8092088  | 2.5270124  | 88.7124695 |
| C  | 3.9535949  | 1.8978948  | 84.2377775 |
| C  | 5.3577442  | 1.8991402  | 86.3731370 |
| H  | 6.1256329  | -0.5973626 | 85.4060652 |
| H  | 6.4534932  | 0.6010321  | 84.1191041 |
| C  | 5.6322750  | 2.3321427  | 90.2171260 |
| C  | 5.1538658  | 1.6926785  | 87.7682698 |
| C  | 4.6600827  | 1.0502228  | 85.3086556 |
| H  | 4.0875095  | 3.8740849  | 90.4238088 |
| H  | 3.2074070  | 2.5687763  | 84.7025676 |
| H  | 5.7413001  | 4.4443455  | 90.8337485 |
| H  | 6.4117738  | 5.9065916  | 85.2864922 |
| H  | 4.6634831  | 2.5208745  | 83.6554068 |
| H  | 8.8228233  | 5.4528360  | 88.2608228 |
| H  | 4.9045393  | 1.5092656  | 90.3650607 |
| H  | 3.8733774  | 0.4577933  | 85.8178422 |
| H  | 7.2170278  | 4.1430091  | 88.9918383 |
| Zn | 1.0089269  | 5.8699531  | 89.2559733 |
| Br | -0.0918895 | 7.4666046  | 90.5537099 |
| C  | 7.3829322  | 8.6602894  | 90.6650948 |
| C  | 3.4254028  | 7.0876443  | 90.5338876 |
| C  | 7.0607613  | 7.6730583  | 89.7112851 |
| C  | 5.1174120  | 8.5953237  | 91.5306428 |
| C  | 4.7903404  | 7.6019797  | 90.5784210 |
| C  | 6.4147418  | 9.1211308  | 91.5744822 |
| C  | 5.7706367  | 7.1388935  | 89.6657727 |
| O  | 3.0566493  | 6.2086834  | 89.7358296 |
| H  | 8.4025473  | 9.0742955  | 90.6961552 |
| H  | 4.3451322  | 8.9492031  | 92.2319544 |
| H  | 7.8280362  | 7.3252388  | 89.0038011 |
| H  | 6.6744520  | 9.8920624  | 92.3150383 |
| H  | 5.4942870  | 6.3614294  | 88.9364621 |
| H  | 4.3888295  | 9.3595523  | 87.5395333 |



|    |            |           |            |
|----|------------|-----------|------------|
| Br | -0.1858409 | 4.5372362 | 84.1572007 |
| H  | 4.1876997  | 4.8388404 | 85.9603789 |
| Zn | 1.8080576  | 4.6037379 | 85.3797989 |
| C  | 4.1657615  | 8.0440885 | 85.8076509 |
| C  | 3.6282135  | 9.0191069 | 86.8024574 |
| C  | 3.5136454  | 6.8489083 | 85.9326346 |
| C  | 3.6047341  | 5.5212878 | 85.2995487 |
| C  | 2.5066877  | 7.0763812 | 86.9833987 |
| O  | 2.5959554  | 8.2971634 | 87.5190479 |
| O  | 1.6282425  | 6.2590548 | 87.3320261 |
| H  | 3.1508319  | 9.9212429 | 86.3616044 |
| H  | 4.1115375  | 5.5554338 | 84.3168878 |
| H  | 2.6829930  | 7.5369486 | 91.2418768 |
| H  | 4.9867215  | 8.2835031 | 85.1184495 |

### 14l-ma

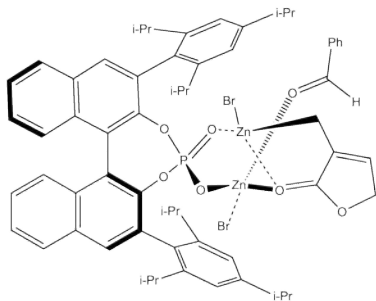

Energy (Hartree) = -11970.02335147

|   |            |            |            |
|---|------------|------------|------------|
| C | -0.0154403 | 0.9568738  | 89.2677614 |
| C | 0.8407865  | 0.0119703  | 89.8384184 |
| C | 0.4099960  | -0.6369295 | 91.0546756 |
| C | 1.2645386  | -1.4726693 | 91.8335443 |
| C | -0.9398086 | -0.4183956 | 91.5186238 |
| C | -1.3920417 | -1.1035445 | 92.6859705 |
| C | -1.7788813 | 0.5156082  | 90.8434913 |
| H | -2.8017766 | 0.6721161  | 91.2182057 |
| C | -1.3196789 | 1.2742208  | 89.7741088 |
| C | 4.2981616  | 0.5341575  | 88.2300191 |
| C | 4.7122466  | -0.7813720 | 88.0567922 |
| H | 5.7149714  | -0.9773771 | 87.6472174 |
| C | 3.8569003  | -1.8830379 | 88.3359359 |
| C | 4.2643675  | -3.2220872 | 88.0567733 |
| C | 2.5352150  | -1.6382399 | 88.8600906 |
| C | 1.6541530  | -2.7533461 | 89.0007352 |
| C | 2.1459949  | -0.2847561 | 89.1844877 |
| C | 3.0151924  | 0.7553916  | 88.8209008 |
| O | 0.3879893  | 1.6000475  | 88.1049126 |
| O | 2.6709570  | 2.0742566  | 89.0887812 |
| P | 1.4863597  | 2.8131914  | 88.2019002 |
| O | 0.9800349  | 3.9335245  | 89.1194646 |
| O | 1.9282088  | 3.1172462  | 86.7790081 |
| C | -0.5446489 | -1.9363608 | 93.4010714 |
| C | 0.8001267  | -2.1055655 | 92.9786316 |
| H | -2.4283576 | -0.9391507 | 93.0210377 |
| H | -0.9062282 | -2.4510601 | 94.3043354 |
| H | 2.3088099  | -1.6082074 | 91.5194055 |
| H | 1.4822667  | -2.7402354 | 93.5647325 |
| C | 2.0726666  | -4.0417020 | 88.6993006 |
| C | 3.3947208  | -4.2853080 | 88.2414994 |
| H | 0.6244941  | -2.5820985 | 89.3420529 |
| H | 1.3690326  | -4.8808554 | 88.8099418 |
| H | 3.7179781  | -5.3127088 | 88.0147947 |
| H | 5.2818720  | -3.3904576 | 87.6700080 |
| C | -2.1720533 | 3.6425082  | 89.9792716 |
| C | -2.0151023 | 2.4607926  | 89.1898821 |
| C | -2.5396079 | 4.8307262  | 89.3222397 |

|   |            |            |            |
|---|------------|------------|------------|
| C | -2.3378448 | 2.4785854  | 87.8069390 |
| C | -2.7074266 | 3.6941920  | 87.2040449 |
| C | -2.7780261 | 4.8903670  | 87.9335079 |
| H | -2.6388573 | 5.7569805  | 89.9068615 |
| C | -2.3661212 | 1.1944086  | 86.9800370 |
| H | -2.9251591 | 3.7027477  | 86.1273621 |
| C | -1.6570298 | 1.3151368  | 85.6228491 |
| H | -2.1801875 | 2.0125214  | 84.9374404 |
| H | -1.6195127 | 0.3262285  | 85.1209428 |
| H | -0.6217797 | 1.6874835  | 85.7387182 |
| C | -3.8246685 | 0.7225245  | 86.8126191 |
| H | -1.8417764 | 0.4073293  | 87.5604900 |
| H | -4.4197977 | 1.4700452  | 86.2473418 |
| H | -4.3178118 | 0.5760112  | 87.7952002 |
| H | -3.8683297 | -0.2372007 | 86.2563833 |
| C | -3.0727532 | 6.2324029  | 87.2707662 |
| C | -1.7569605 | 6.9911922  | 86.9995094 |
| H | -1.9592233 | 7.9813668  | 86.5396042 |
| H | -1.1133506 | 6.4142975  | 86.3033006 |
| H | -1.1954191 | 7.1700267  | 87.9380950 |
| C | -3.9030281 | 6.1222490  | 85.9844349 |
| H | -3.6570940 | 6.8290478  | 88.0073710 |
| H | -4.1917584 | 7.1308378  | 85.6248206 |
| H | -4.8302604 | 5.5344728  | 86.1411005 |
| H | -3.3221632 | 5.6415127  | 85.1702758 |
| C | -1.9502224 | 3.6367626  | 91.4992119 |
| C | -0.4640345 | 3.6637160  | 91.9075212 |
| H | -0.3661831 | 3.5245684  | 93.0041523 |
| H | -0.0104874 | 4.6435311  | 91.6541285 |
| H | 0.1284766  | 2.8774956  | 91.4041463 |
| C | -2.7177312 | 4.7474455  | 92.2334582 |
| H | -2.3596379 | 2.6758311  | 91.8712440 |
| H | -2.6490061 | 4.5919387  | 93.3295995 |
| H | -3.7909370 | 4.7610041  | 91.9554068 |
| H | -2.2925233 | 5.7496287  | 92.0203119 |
| H | 8.3466831  | 4.3367616  | 85.4189474 |
| H | 7.7527185  | 2.6102754  | 90.7933738 |
| H | 5.1056511  | -0.5836432 | 83.9173553 |
| C | 7.9412477  | 4.7386701  | 86.3743092 |
| H | 4.8778283  | 3.3480199  | 91.9896779 |
| H | 7.9264669  | 6.8035399  | 85.6113465 |
| H | 3.3969803  | 1.2498559  | 83.5374328 |
| C | 6.9568102  | 3.6927642  | 86.8918138 |
| C | 6.9595117  | 1.8382161  | 90.8813220 |
| C | 7.2211117  | 6.0575344  | 86.0340786 |
| H | 6.7533186  | 6.5017687  | 86.9366605 |
| C | 6.7003217  | 3.4990631  | 88.2602028 |
| C | 5.6314007  | 0.0572877  | 84.6547915 |
| H | 9.6594911  | 4.0285062  | 87.5486080 |
| C | 6.2559830  | 2.8876559  | 85.9766605 |
| C | 9.1364124  | 4.9755936  | 87.3079748 |
| H | 9.8682100  | 5.6652812  | 86.8402824 |
| H | 6.4337565  | 3.0393256  | 84.8990906 |
| C | 5.0728612  | 3.5508113  | 90.9162822 |
| H | 6.8098477  | 1.6341655  | 91.9617931 |
| H | 7.3401280  | 0.9114490  | 90.4062621 |
| C | 5.8174905  | 2.5029042  | 88.7226304 |
| C | 3.9393797  | 1.8978257  | 84.2551727 |
| C | 5.3553464  | 1.8867323  | 86.3826570 |
| H | 6.1142992  | -0.6061556 | 85.3996585 |
| H | 6.4394222  | 0.5976758  | 84.1181671 |
| C | 5.6449018  | 2.3007580  | 90.2266768 |
| C | 5.1581547  | 1.6733920  | 87.7774650 |
| C | 4.6512154  | 1.0441211  | 85.3175470 |
| H | 4.1196782  | 3.8610196  | 90.4467691 |
| H | 3.1963588  | 2.5666145  | 84.7276116 |
| H | 5.7809399  | 4.4050885  | 90.8666430 |
| H | 6.4074031  | 5.8904024  | 85.3021250 |
| H | 4.6459195  | 2.5222960  | 83.6702121 |
| H | 8.8261099  | 5.4322545  | 88.2712496 |
| H | 4.9090141  | 1.4848565  | 90.3718485 |

|    |            |            |            |
|----|------------|------------|------------|
| H  | 3.8668247  | 0.4498364  | 85.8280464 |
| H  | 7.2298450  | 4.1138926  | 89.0046724 |
| Zn | 0.9543533  | 5.8369759  | 89.3191522 |
| Br | -0.0991892 | 7.4549459  | 90.6182092 |
| C  | 7.3255726  | 8.7722754  | 90.5093099 |
| C  | 3.3854577  | 7.1400293  | 90.5058620 |
| C  | 7.0305127  | 7.6758342  | 89.6746815 |
| C  | 5.0474660  | 8.7774270  | 91.3414433 |
| C  | 4.7472798  | 7.6749549  | 90.5090171 |
| C  | 6.3368355  | 9.3240463  | 91.3423156 |
| C  | 5.7468016  | 7.1228302  | 89.6712495 |
| O  | 3.0363722  | 6.1753160  | 89.8089084 |
| H  | 8.3398544  | 9.2005112  | 90.5076620 |
| H  | 4.2589991  | 9.1997399  | 91.9847913 |
| H  | 7.8119922  | 7.2551637  | 89.0247332 |
| H  | 6.5745839  | 10.1805973 | 91.9905201 |
| H  | 5.4918429  | 6.2637194  | 89.0310602 |
| H  | 4.3888329  | 9.3530805  | 87.5981281 |
| Br | -0.1828287 | 4.5687058  | 84.1638388 |
| H  | 4.1437572  | 4.8188654  | 86.0422697 |
| Zn | 1.7900304  | 4.6074509  | 85.3902613 |
| C  | 4.1532331  | 8.0384625  | 85.8658821 |
| C  | 3.6211188  | 9.0113421  | 86.8680158 |
| C  | 3.5093922  | 6.8391482  | 85.9982707 |
| C  | 3.5988824  | 5.5159630  | 85.3647520 |
| C  | 2.5065223  | 7.0631795  | 87.0575739 |
| O  | 2.6009049  | 8.2872562  | 87.5945071 |
| O  | 1.6326890  | 6.2490239  | 87.4097125 |
| H  | 3.1346538  | 9.9131676  | 86.4347494 |
| H  | 4.1325094  | 5.5436373  | 84.3964632 |
| H  | 2.6258861  | 7.6583214  | 91.1475437 |
| H  | 4.9679388  | 8.2777809  | 85.1694561 |

### 14l-mi; COSMO

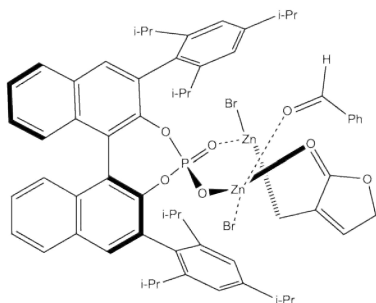

Energy (Hartree) = -11970.03722999

|   |            |            |            |
|---|------------|------------|------------|
| C | 0.4183223  | 1.4853804  | 89.2171566 |
| C | 0.9096329  | 0.2149767  | 89.5468760 |
| C | 0.1815832  | -0.5520825 | 90.5318339 |
| C | 0.6829717  | -1.7644237 | 91.0955626 |
| C | -1.0944513 | -0.0637165 | 90.9975177 |
| C | -1.8420182 | -0.8402042 | 91.9339074 |
| C | -1.5608635 | 1.2089877  | 90.5623389 |
| H | -2.5261696 | 1.5775034  | 90.9415919 |
| C | -0.8005920 | 2.0251976  | 89.7324420 |
| C | 4.5695863  | 0.0726814  | 88.3643391 |
| C | 4.6513357  | -1.2280145 | 87.8832856 |
| H | 5.6113689  | -1.5987471 | 87.4926088 |
| C | 3.5068326  | -2.0745811 | 87.8094036 |
| C | 3.5913888  | -3.3714485 | 87.2186647 |
| C | 2.2278934  | -1.5956271 | 88.2795375 |
| C | 1.0803173  | -2.4155734 | 88.0599497 |
| C | 2.1581583  | -0.2995018 | 88.9160400 |
| C | 3.3118363  | 0.4898827  | 88.9043089 |
| O | 1.0975070  | 2.2685795  | 88.2907512 |
| O | 3.2671904  | 1.7573642  | 89.4838128 |
| P | 2.5319569  | 2.9719305  | 88.6714766 |
| O | 2.3469327  | 4.1018256  | 89.6965148 |

|   |            |            |            |
|---|------------|------------|------------|
| O | 3.2025715  | 3.2959979  | 87.3328757 |
| C | -1.3403825 | -2.0326764 | 92.4331150 |
| C | -0.0578445 | -2.4851724 | 92.0224390 |
| H | -2.8201580 | -0.4599527 | 92.2682305 |
| H | -1.9229139 | -2.6181935 | 93.1606700 |
| H | 1.6771638  | -2.1233780 | 90.7965073 |
| H | 0.3565296  | -3.4124736 | 92.4466565 |
| C | 1.1930182  | -3.6639210 | 87.4622159 |
| C | 2.4605680  | -4.1574722 | 87.0539363 |
| H | 0.0909979  | -2.0446229 | 88.3611430 |
| H | 0.2903584  | -4.2723953 | 87.2990031 |
| H | 2.5398757  | -5.1526258 | 86.5903173 |
| H | 4.5757170  | -3.7280751 | 86.8766148 |
| C | -1.1623944 | 4.3959505  | 90.5035538 |
| C | -1.1851151 | 3.4425444  | 89.4441333 |
| C | -1.5279729 | 5.7262186  | 90.2217257 |
| C | -1.5508709 | 3.8490267  | 88.1307476 |
| C | -1.9175403 | 5.1882819  | 87.9097740 |
| C | -1.9187637 | 6.1449843  | 88.9392314 |
| H | -1.5151723 | 6.4699935  | 91.0357352 |
| C | -1.6059293 | 2.8698779  | 86.9592904 |
| H | -2.2191413 | 5.4911098  | 86.8946571 |
| C | -0.6920236 | 3.3021387  | 85.7981965 |
| H | -1.0227512 | 4.2632557  | 85.3515270 |
| H | -0.7022726 | 2.5407203  | 84.9913926 |
| H | 0.3548471  | 3.4234969  | 86.1390490 |
| C | -3.0564138 | 2.6567964  | 86.4863944 |
| H | -1.2381623 | 1.8881762  | 87.3188342 |
| H | -3.4978693 | 3.5972062  | 86.0947088 |
| H | -3.7011806 | 2.3032501  | 87.3165965 |
| H | -3.0976836 | 1.9024685  | 85.6735118 |
| C | -2.3851686 | 7.5753253  | 88.6988491 |
| C | -1.7514304 | 8.2170318  | 87.4544338 |
| H | -2.0310851 | 9.2885638  | 87.3802389 |
| H | -2.0947361 | 7.7257464  | 86.5202917 |
| H | -0.6460232 | 8.1436495  | 87.4787525 |
| C | -3.9233138 | 7.6412908  | 88.6357489 |
| H | -2.0636003 | 8.1680697  | 89.5831093 |
| H | -4.2732087 | 8.6883124  | 88.5179344 |
| H | -4.3815114 | 7.2253433  | 89.5555835 |
| H | -4.3077638 | 7.0553037  | 87.7745556 |
| C | -0.7854355 | 4.0213980  | 91.9385932 |
| C | 0.3160531  | 4.9135605  | 92.5308833 |
| H | 0.5945513  | 4.5629321  | 93.5454199 |
| H | -0.0150779 | 5.9688846  | 92.6309071 |
| H | 1.2296543  | 4.8864985  | 91.9082127 |
| C | -2.0299207 | 4.0159328  | 92.8472011 |
| H | -0.3788080 | 2.9910536  | 91.9219182 |
| H | -1.7673431 | 3.6867043  | 93.8739265 |
| H | -2.8169758 | 3.3375791  | 92.4607397 |
| H | -2.4743923 | 5.0310330  | 92.9195769 |
| H | 8.3557065  | 4.8027466  | 86.8040377 |
| H | 8.0944166  | 1.0431599  | 91.3727528 |
| H | 6.2393348  | -0.3830942 | 84.0905247 |
| C | 8.1033150  | 4.6791120  | 87.8802667 |
| H | 5.2789576  | 1.6530045  | 92.7919262 |
| H | 7.7330630  | 6.8291677  | 88.1633253 |
| H | 4.4553651  | 1.4090457  | 83.7823891 |
| C | 7.3262479  | 3.3754305  | 88.0048617 |
| C | 7.2344710  | 0.3486708  | 91.2676957 |
| C | 7.2004030  | 5.8621248  | 88.2808929 |
| H | 6.8771939  | 5.7786826  | 89.3403230 |
| C | 7.0373382  | 2.8161152  | 89.2633644 |
| C | 6.6059006  | 0.1407016  | 84.9981782 |
| H | 10.0658676 | 3.8214511  | 88.3886185 |
| C | 6.8120117  | 2.7348462  | 86.8661107 |
| C | 9.4196728  | 4.6764839  | 88.6741533 |
| H | 9.9866102  | 5.6128454  | 88.4925417 |
| H | 7.0371661  | 3.1631213  | 85.8766661 |
| C | 5.5203272  | 2.1431045  | 91.8260225 |
| H | 7.0619474  | -0.1298525 | 92.2544281 |

|    |            |            |            |
|----|------------|------------|------------|
| H  | 7.5279619  | -0.4417829 | 90.5470644 |
| C  | 6.2105444  | 1.6900180  | 89.4042081 |
| C  | 4.8591900  | 1.9505072  | 84.6630830 |
| C  | 5.9802036  | 1.6019919  | 86.9480048 |
| H  | 7.0207112  | -0.6198038 | 85.6913765 |
| H  | 7.4438728  | 0.8023888  | 84.6933682 |
| C  | 5.9747945  | 1.1000083  | 90.7934116 |
| C  | 5.6502271  | 1.0965617  | 88.2386349 |
| C  | 5.4755234  | 0.9554671  | 85.6574715 |
| H  | 4.6203145  | 2.6875261  | 91.4820977 |
| H  | 4.0350711  | 2.5179658  | 85.1342824 |
| H  | 6.3062446  | 2.8990139  | 92.0298603 |
| H  | 6.2884334  | 5.8945649  | 87.6529738 |
| H  | 5.5937684  | 2.6925720  | 84.2909748 |
| H  | 9.2374653  | 4.6123416  | 89.7673718 |
| H  | 5.1655841  | 0.3455465  | 90.7061638 |
| H  | 4.6717413  | 0.2429701  | 85.9293156 |
| H  | 7.4506104  | 3.2857262  | 90.1694857 |
| Zn | 3.2713871  | 5.7279698  | 90.2390158 |
| Br | 4.4906890  | 5.8586195  | 92.2186355 |
| C  | -0.5499251 | 10.7476962 | 90.1885017 |
| C  | 0.2487408  | 9.6020584  | 90.1718948 |
| C  | 0.7489873  | 9.0780697  | 91.3892185 |
| C  | 0.4471182  | 9.7143281  | 92.6159401 |
| C  | -0.3621688 | 10.8571317 | 92.6261660 |
| C  | -0.8586132 | 11.3712402 | 91.4146249 |
| H  | -0.9415649 | 11.1609151 | 89.2467356 |
| H  | 0.5053640  | 9.0928581  | 89.2309082 |
| C  | 1.5833520  | 7.8821998  | 91.3889823 |
| H  | 0.8477222  | 9.3018302  | 93.5555021 |
| H  | -0.6063417 | 11.3529386 | 93.5773324 |
| H  | -1.4919235 | 12.2717437 | 91.4236191 |
| O  | 1.8003194  | 7.2157970  | 90.3612884 |
| C  | 2.1209515  | 8.7527232  | 86.4938154 |
| C  | 2.2372212  | 7.5534019  | 87.1417654 |
| C  | 3.4544478  | 7.6798172  | 87.9749764 |
| O  | 4.0086189  | 8.8921988  | 87.8544768 |
| C  | 3.2443249  | 6.6497370  | 86.8916830 |
| O  | 3.9963088  | 6.8135547  | 88.6893183 |
| C  | 1.5419245  | 6.2672456  | 87.0366553 |
| H  | 0.6695876  | 6.3048536  | 86.3593137 |
| H  | 3.9281271  | 9.9066778  | 86.0522667 |
| H  | 2.9281052  | 10.5997776 | 87.3761346 |
| Zn | 3.0144086  | 5.0389018  | 86.3764986 |
| H  | 1.2178249  | 5.8808374  | 88.0245761 |
| Br | 4.7336074  | 5.7164232  | 84.9302792 |
| H  | 1.3611613  | 9.0315827  | 85.7515137 |
| H  | 2.0531746  | 7.5732773  | 92.3570313 |

|   |            |            |            |
|---|------------|------------|------------|
| C | -0.8087047 | 2.0431158  | 89.7316390 |
| C | 4.5639836  | 0.0890126  | 88.3783270 |
| C | 4.6447471  | -1.2128091 | 87.9004290 |
| H | 5.6048109  | -1.5823974 | 87.5088123 |
| C | 3.5013270  | -2.0606029 | 87.8299712 |
| C | 3.5856734  | -3.3585937 | 87.2428524 |
| C | 2.2225853  | -1.5815354 | 88.2998826 |
| C | 1.0758397  | -2.4029076 | 88.0831289 |
| C | 2.1528952  | -0.2837871 | 88.9329317 |
| C | 3.3064973  | 0.5054878  | 88.9195524 |
| O | 1.0930350  | 2.2863696  | 88.2988852 |
| O | 3.2601260  | 1.7745391  | 89.4958944 |
| P | 2.5328058  | 2.9841685  | 88.6721014 |
| O | 2.3537661  | 4.1300955  | 89.6809130 |
| O | 3.2038004  | 3.2890608  | 87.3290610 |
| C | -1.3585727 | -2.0067945 | 92.4403003 |
| C | -0.0746343 | -2.4593926 | 92.0361717 |
| H | -2.8377118 | -0.4352063 | 92.2658773 |
| H | -1.9442567 | -2.5909488 | 93.1663429 |
| H | 1.6653520  | -2.0986225 | 90.8164121 |
| H | 0.3382724  | -3.3857619 | 92.4636744 |
| C | 1.1891039  | -3.6526702 | 87.4894219 |
| C | 2.4560784  | -4.1461189 | 87.0814784 |
| H | 0.0868718  | -2.0313165 | 88.3842928 |
| H | 0.2867157  | -4.2621913 | 87.3289483 |
| H | 2.5360747  | -5.1423739 | 86.6204672 |
| H | 4.5699864  | -3.7147603 | 86.9003706 |
| C | -1.1696782 | 4.4194279  | 90.4846152 |
| C | -1.1926349 | 3.4584026  | 89.4330498 |
| C | -1.5335948 | 5.7480676  | 90.1924988 |
| C | -1.5564711 | 3.8546770  | 88.1160351 |
| C | -1.9214452 | 5.1920817  | 87.8847964 |
| C | -1.9227885 | 6.1565944  | 88.9067896 |
| H | -1.5209260 | 6.4981322  | 91.0008560 |
| C | -1.6102304 | 2.8657279  | 86.9528490 |
| H | -2.2225996 | 5.4874072  | 86.8670268 |
| C | -0.6922890 | 3.2854007  | 85.7905205 |
| H | -1.0189010 | 4.2431523  | 85.3335337 |
| H | -0.7018490 | 2.5172710  | 84.9903190 |
| H | 0.3539408  | 3.4058184  | 86.1331923 |
| C | -3.0599314 | 2.6505417  | 86.4791134 |
| H | -1.2444231 | 1.8870303  | 87.3223307 |
| H | -3.5002081 | 3.5876045  | 86.0783308 |
| H | -3.7068891 | 2.3058025  | 87.3110369 |
| H | -3.1013283 | 1.8893471  | 85.6727809 |
| C | -2.3818244 | 7.5862424  | 88.6487122 |
| C | -1.6630680 | 8.2401918  | 87.4570352 |
| H | -1.9444266 | 9.3103408  | 87.3656522 |
| H | -1.9342234 | 7.7504879  | 86.4985493 |
| H | -0.5615133 | 8.1720286  | 87.5578304 |
| C | -3.9113840 | 7.6484840  | 88.4784766 |
| H | -2.1248942 | 8.1719542  | 89.5584940 |
| H | -4.2571905 | 8.6950726  | 88.3455820 |
| H | -4.4310567 | 7.2218368  | 89.3596205 |
| H | -4.2342012 | 7.0697367  | 87.5878775 |
| C | -0.7941567 | 4.0537320  | 91.9222121 |
| C | 0.3145041  | 4.9423173  | 92.5060736 |
| H | 0.5934550  | 4.5975538  | 93.5224406 |
| H | -0.0111419 | 6.0003491  | 92.5994517 |
| H | 1.2268879  | 4.9046571  | 91.8823638 |
| C | -2.0378669 | 4.0621872  | 92.8313847 |
| H | -0.3941471 | 3.0207512  | 91.9126320 |
| H | -1.7774718 | 3.7391879  | 93.8605949 |
| H | -2.8289871 | 3.3857367  | 92.4502215 |
| H | -2.4779630 | 5.0796472  | 92.8963403 |
| H | 8.3800735  | 4.7886189  | 86.7933709 |
| H | 8.0936706  | 1.0772504  | 91.3706294 |
| H | 6.2493436  | -0.3892419 | 84.1080695 |
| C | 8.0950471  | 4.6939164  | 87.8644094 |
| H | 5.2852729  | 1.6821451  | 92.8018218 |
| H | 7.7094780  | 6.8500636  | 88.0785406 |

### 14l-mi

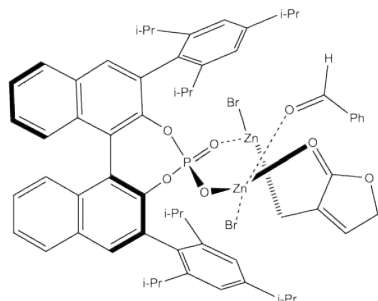

Energy (Hartree) = -11970.02211922

|   |            |            |            |
|---|------------|------------|------------|
| C | 0.4134767  | 1.5036089  | 89.2237637 |
| C | 0.9033170  | 0.2339727  | 89.5589225 |
| C | 0.1707889  | -0.5296052 | 90.5431723 |
| C | 0.6699280  | -1.7403356 | 91.1117135 |
| C | -1.1073969 | -0.0409605 | 91.0021735 |
| C | -1.8579976 | -0.8159006 | 91.9366674 |
| C | -1.5723382 | 1.2298469  | 90.5607777 |
| H | -2.5394456 | 1.6003517  | 90.9336088 |

|    |            |            |            |
|----|------------|------------|------------|
| H  | 4.4612456  | 1.3930034  | 83.7816827 |
| C  | 7.3170784  | 3.3918533  | 87.9999559 |
| C  | 7.2351824  | 0.3805207  | 91.2705002 |
| C  | 7.1769807  | 5.8841339  | 88.2040854 |
| H  | 6.8206711  | 5.8280667  | 89.2545145 |
| C  | 7.0265765  | 2.8409701  | 89.2614988 |
| C  | 6.6104175  | 0.1431734  | 85.0128640 |
| H  | 10.0398695 | 3.8542489  | 88.4634820 |
| C  | 6.8036356  | 2.7440379  | 86.8650706 |
| C  | 9.3862681  | 4.7190631  | 88.6974569 |
| H  | 9.9594343  | 5.6482897  | 88.5002102 |
| H  | 7.0303019  | 3.1657416  | 85.8731214 |
| C  | 5.5174508  | 2.1704193  | 91.8329116 |
| H  | 7.0686037  | -0.0970241 | 92.2586922 |
| H  | 7.5286026  | -0.4094540 | 90.5495845 |
| C  | 6.2019382  | 1.7142656  | 89.4086287 |
| C  | 4.8538772  | 1.9403243  | 84.6636560 |
| C  | 5.9734704  | 1.6109453  | 86.9528546 |
| H  | 7.0304425  | -0.6090176 | 85.7119026 |
| H  | 7.4447808  | 0.8077781  | 84.7052906 |
| C  | 5.9715523  | 1.1276480  | 90.8002298 |
| C  | 5.6432708  | 1.1131609  | 88.2464686 |
| C  | 5.4738194  | 0.9548482  | 85.6651167 |
| H  | 4.6109901  | 2.7075800  | 91.4951344 |
| H  | 4.0192973  | 2.4988440  | 85.1266578 |
| H  | 6.2985827  | 2.9326512  | 92.0307653 |
| H  | 6.2870877  | 5.8981551  | 87.5445389 |
| H  | 5.5807043  | 2.6907095  | 84.2934814 |
| H  | 9.1715422  | 4.6955949  | 89.7862802 |
| H  | 5.1644402  | 0.3703231  | 90.7171721 |
| H  | 4.6734504  | 0.2391826  | 85.9388598 |
| H  | 7.4391533  | 3.3157371  | 90.1650344 |
| Zn | 3.3136928  | 5.7423313  | 90.2130913 |
| Br | 4.5078993  | 5.8812385  | 92.1994254 |
| C  | -0.6799060 | 10.6767996 | 90.4522959 |
| C  | 0.1650630  | 9.5692841  | 90.3481015 |
| C  | 0.7527973  | 9.0234845  | 91.5140630 |
| C  | 0.4923650  | 9.6006487  | 92.7779795 |
| C  | -0.3612749 | 10.7061840 | 92.8769100 |
| C  | -0.9456960 | 11.2416706 | 91.7154293 |
| H  | -1.1408760 | 11.1040634 | 89.5488588 |
| H  | 0.3900418  | 9.1052423  | 89.3765147 |
| C  | 1.6317930  | 7.8593810  | 91.4238261 |
| H  | 0.9603373  | 9.1699850  | 93.6775864 |
| H  | -0.5725447 | 11.1556769 | 93.8585383 |
| H  | -1.6151037 | 12.1122603 | 91.7938382 |
| O  | 1.8237321  | 7.2435799  | 90.3628174 |
| C  | 2.1842091  | 8.6755806  | 86.3382930 |
| C  | 2.2624994  | 7.5210170  | 87.0682290 |
| C  | 3.4892927  | 7.6641085  | 87.8886238 |
| O  | 4.0837434  | 8.8458137  | 87.6788943 |
| C  | 3.3530083  | 9.5479580  | 86.6539123 |
| O  | 4.0065423  | 6.8356009  | 88.6591730 |
| C  | 1.5421524  | 6.2478458  | 87.0309330 |
| H  | 0.6543523  | 6.2699371  | 86.3737044 |
| H  | 4.0435847  | 9.6807033  | 85.7903518 |
| H  | 3.0945120  | 10.5566575 | 87.0456358 |
| Zn | 3.0089430  | 5.0128979  | 86.3482516 |
| H  | 1.2491782  | 5.8858854  | 88.0367041 |
| Br | 4.6676171  | 5.7112405  | 84.8617823 |
| H  | 1.4355889  | 8.9195339  | 85.5728793 |
| H  | 2.1597582  | 7.5278399  | 92.3551310 |

Energy (Hartree) = -11970.0319039

|   |             |             |             |
|---|-------------|-------------|-------------|
| C | -37.1959676 | -57.6598479 | 388.2669072 |
| C | -36.4443614 | -58.8289885 | 388.4031066 |
| C | -37.0171118 | -59.8990209 | 389.1884224 |
| C | -36.2864747 | -61.0736835 | 389.5402307 |
| C | -38.3747261 | -59.7734435 | 389.6688200 |
| C | -38.9570087 | -60.8483579 | 390.4055902 |
| C | -39.0924874 | -58.5586459 | 389.4598008 |
| H | -40.1102139 | -58.4643016 | 389.8693067 |
| C | -38.5043056 | -57.4795274 | 388.8163348 |
| C | -32.8129243 | -57.9540735 | 387.4793164 |
| C | -32.4433953 | -59.0814958 | 386.7557013 |
| H | -31.4101942 | -59.1685674 | 386.3874913 |
| C | -33.3759074 | -60.1049380 | 386.4268330 |
| C | -33.0015299 | -61.1980503 | 385.5890373 |
| C | -34.7336964 | -60.0128423 | 386.9040380 |
| C | -35.6742137 | -60.9847108 | 386.4493902 |
| C | -35.0952950 | -58.9215209 | 387.7760585 |
| C | -34.1473124 | -57.9126871 | 387.9869437 |
| O | -36.6933592 | -56.6008472 | 387.5275547 |
| O | -34.4842857 | -56.8101322 | 388.7751906 |
| P | -35.4690844 | -55.6735386 | 388.1235967 |
| O | -35.9148449 | -54.8419513 | 389.3370829 |
| O | -34.8939691 | -54.9739236 | 386.8901665 |
| C | -38.2279284 | -61.9911943 | 390.6985870 |
| C | -36.8758874 | -62.0929826 | 390.2759488 |
| H | -39.9966250 | -60.7433514 | 390.7538255 |
| H | -38.6877506 | -62.8099538 | 391.2726671 |
| H | -35.2376013 | -61.1640024 | 389.2265015 |
| H | -36.2870316 | -62.9845460 | 390.5372780 |
| C | -35.2849968 | -62.0233652 | 385.6150271 |
| C | -33.9338507 | -62.1451841 | 385.1938339 |
| H | -36.7267359 | -60.8945554 | 386.7506711 |
| H | -36.0331095 | -62.7531858 | 385.2695589 |
| H | -33.6354060 | -62.9775834 | 384.5383937 |
| H | -31.9578140 | -61.2604871 | 385.2428780 |
| C | -39.0403172 | -55.2909116 | 389.9291495 |
| C | -39.0526614 | -56.0902095 | 388.7564557 |
| C | -39.2821298 | -53.8933827 | 389.7976691 |
| C | -39.3887415 | -55.5133852 | 387.4962360 |
| C | -39.6220446 | -54.1292744 | 387.4106667 |
| C | -39.5680834 | -53.2911866 | 388.5388237 |
| H | -39.3912531 | -53.2819244 | 390.7093573 |
| C | -39.5464682 | -56.4061366 | 386.2702071 |
| H | -39.8534335 | -53.6870768 | 386.4330839 |
| C | -39.2773090 | -55.7042826 | 384.9358194 |
| H | -40.0484971 | -54.9449456 | 384.6900607 |
| H | -39.2640203 | -56.4455347 | 384.1130276 |
| H | -38.2896359 | -55.2038349 | 384.9381183 |
| C | -40.9466889 | -57.0544512 | 386.2934642 |
| H | -38.8036623 | -57.2247945 | 386.3562004 |
| H | -41.7407038 | -56.2818616 | 386.2254203 |
| H | -41.1109667 | -57.6312106 | 387.2259381 |
| H | -41.0656390 | -57.7473414 | 385.4356656 |
| C | -39.8854260 | -51.8021999 | 388.4756073 |
| C | -39.6646052 | -51.1758788 | 387.0933856 |
| H | -39.7731550 | -50.0746809 | 387.1566369 |
| H | -40.4193749 | -51.5308767 | 386.3605429 |
| H | -38.6608106 | -51.3945054 | 386.6793141 |
| C | -41.3234591 | -51.5562507 | 388.9784348 |
| H | -39.1968536 | -51.3053223 | 389.1977220 |
| H | -41.5450611 | -50.4698518 | 388.9980441 |
| H | -41.4764794 | -51.9547642 | 390.0014786 |
| H | -42.0607588 | -52.0452692 | 388.3079683 |
| C | -38.8281364 | -55.8808611 | 391.3203696 |
| C | -37.7648808 | -55.1542142 | 392.1575993 |
| H | -37.6467892 | -55.6604858 | 393.1369532 |
| H | -38.0266612 | -54.0963641 | 392.3645602 |
| H | -36.7790638 | -55.1744231 | 391.6506312 |
| C | -40.1814039 | -55.9458794 | 392.0572330 |

### 14n-ma; COSMO

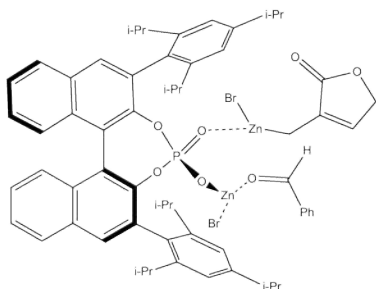

|    |             |             |             |
|----|-------------|-------------|-------------|
| H  | -38.4737411 | -56.9210286 | 391.1860191 |
| H  | -40.0611408 | -56.4413433 | 393.0422057 |
| H  | -40.9365569 | -56.5127400 | 391.4755301 |
| H  | -40.5895467 | -54.9292636 | 392.2374581 |
| H  | -29.0252995 | -52.9493532 | 387.3380600 |
| H  | -29.7321858 | -57.4438061 | 391.1087029 |
| H  | -31.4125790 | -57.1433992 | 383.2925465 |
| C  | -29.1239863 | -53.4672138 | 388.3184267 |
| H  | -32.7354420 | -57.2030172 | 392.1620463 |
| H  | -28.9910210 | -51.5728590 | 389.4170532 |
| H  | -33.0512521 | -55.1743276 | 383.5778108 |
| C  | -30.0844159 | -54.6312692 | 388.1064144 |
| C  | -30.5159745 | -58.1405538 | 390.7441896 |
| C  | -29.6712829 | -52.4454712 | 389.3312356 |
| H  | -29.7677069 | -52.8918305 | 390.3428460 |
| C  | -30.4990384 | -55.4408219 | 389.1784250 |
| C  | -30.9845857 | -56.9372637 | 384.2954827 |
| H  | -27.3125443 | -54.6682239 | 387.9736692 |
| C  | -30.5833363 | -54.9347935 | 386.8290482 |
| C  | -27.7233157 | -53.9623667 | 388.7235450 |
| H  | -27.0156200 | -53.1133212 | 388.8239000 |
| H  | -30.2590249 | -54.3156613 | 385.9761809 |
| C  | -32.4180191 | -56.5472466 | 391.3249849 |
| H  | -30.7972507 | -58.8018276 | 391.5899840 |
| H  | -30.0632852 | -58.7701503 | 389.9512491 |
| C  | -31.3791287 | -56.5235790 | 389.0040277 |
| C  | -32.4944804 | -54.9293849 | 384.5068012 |
| C  | -31.4839555 | -55.9929538 | 386.5998984 |
| H  | -30.6614628 | -57.9032696 | 384.7305248 |
| H  | -30.0765086 | -56.3122239 | 384.1596711 |
| C  | -31.7452663 | -57.3769732 | 390.2168551 |
| C  | -31.8747141 | -56.8077255 | 387.7007062 |
| C  | -32.0172127 | -56.2239032 | 385.1875622 |
| H  | -33.3144877 | -56.0244406 | 390.9381521 |
| H  | -33.1534495 | -54.3338714 | 385.1714727 |
| H  | -31.7263284 | -55.7867975 | 391.7443854 |
| H  | -30.6719503 | -52.0744220 | 389.0313796 |
| H  | -31.6549729 | -54.2641202 | 384.2144695 |
| H  | -27.7552095 | -54.4902830 | 389.6997580 |
| H  | -32.4787962 | -58.1395295 | 389.8860399 |
| H  | -32.9060757 | -56.8822382 | 385.2675641 |
| H  | -30.1202078 | -55.2260790 | 390.1906090 |
| Zn | -37.0716388 | -53.2728626 | 389.5657137 |
| Br | -36.8681124 | -51.5672755 | 391.1814926 |
| C  | -31.9038612 | -50.2218973 | 386.6177143 |
| C  | -35.8674221 | -51.1986948 | 387.8256972 |
| C  | -32.3039452 | -51.5727908 | 386.6669778 |
| C  | -34.1116828 | -49.5195735 | 387.3365490 |
| C  | -34.5141030 | -50.8733152 | 387.3929084 |
| C  | -32.8060251 | -49.1955794 | 386.9514187 |
| C  | -33.6049556 | -51.9053359 | 387.0531224 |
| O  | -36.2902380 | -52.3684151 | 387.9051033 |
| H  | -30.8743361 | -49.9686229 | 386.3196967 |
| H  | -34.8331351 | -48.7279893 | 387.5926062 |
| H  | -31.5941502 | -52.3718897 | 386.4093176 |
| H  | -32.4872542 | -48.1435440 | 386.9071539 |
| H  | -33.9414002 | -52.9530053 | 387.1064049 |
| Br | -35.5918932 | -57.4229174 | 384.3504516 |
| Zn | -35.5626837 | -55.1397947 | 384.9752758 |
| H  | -32.8084705 | -50.6438911 | 383.9488200 |
| H  | -36.3247320 | -54.0692370 | 382.8639177 |
| C  | -34.2003929 | -52.1235843 | 383.1405107 |
| C  | -33.7838296 | -50.7157497 | 383.4141760 |
| H  | -33.6213952 | -52.8082298 | 382.5055203 |
| C  | -35.3665286 | -52.3948361 | 383.7924126 |
| C  | -36.2124183 | -53.5975930 | 383.8620650 |
| C  | -35.7481641 | -51.1400813 | 384.5065940 |
| O  | -34.8030837 | -50.1750723 | 384.2637262 |
| O  | -36.7207609 | -50.9126254 | 385.2091664 |
| H  | -33.7110395 | -50.0838336 | 382.5000779 |
| H  | -37.2189873 | -53.3174538 | 384.2346688 |

|   |             |             |             |
|---|-------------|-------------|-------------|
| H | -36.5122660 | -50.3441362 | 388.1487322 |
|---|-------------|-------------|-------------|

### 14n-ma

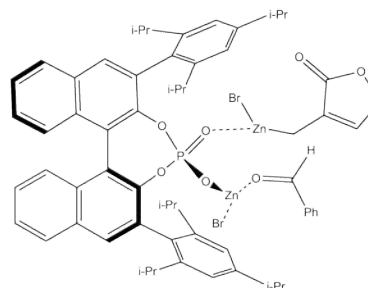

Energy (Hartree) = -11970.01905951

|   |             |             |             |
|---|-------------|-------------|-------------|
| C | -37.2002275 | -57.6584721 | 388.2680091 |
| C | -36.4455684 | -58.8254378 | 388.4058808 |
| C | -37.0164046 | -59.8971541 | 389.1900088 |
| C | -36.2829547 | -61.0696971 | 389.5420684 |
| C | -38.3750828 | -59.7764060 | 389.6679741 |
| C | -38.9543871 | -60.8536504 | 390.4027861 |
| C | -39.0960062 | -58.5642373 | 389.4565578 |
| H | -40.1151845 | -58.4724024 | 389.8634423 |
| C | -38.5108785 | -57.4830689 | 388.8138872 |
| C | -32.8168565 | -57.9415132 | 387.4825827 |
| C | -32.4444917 | -59.0698736 | 386.7621822 |
| H | -31.4105418 | -59.1534107 | 386.3953166 |
| C | -33.3733123 | -60.0962138 | 386.4341098 |
| C | -32.9963078 | -61.1897703 | 385.5989561 |
| C | -34.7315401 | -60.0058821 | 386.9096014 |
| C | -35.6694993 | -60.9799246 | 386.4550440 |
| C | -35.0959741 | -58.9141564 | 387.7799521 |
| C | -34.1513410 | -57.9017490 | 387.9896802 |
| O | -36.7002933 | -56.5987885 | 387.5300828 |
| O | -34.4905115 | -56.7989394 | 388.7760060 |
| P | -35.4802147 | -55.6650026 | 388.1259817 |
| O | -35.9333713 | -54.8405936 | 389.3417742 |
| O | -34.9109059 | -54.9599863 | 386.8936118 |
| C | -38.2227181 | -61.9940934 | 390.6960853 |
| C | -36.8702932 | -62.0912123 | 390.2754869 |
| H | -39.9950270 | -60.7523670 | 390.7491824 |
| H | -38.6811465 | -62.8146683 | 391.2685957 |
| H | -35.2337853 | -61.1556099 | 389.2285034 |
| H | -36.2790880 | -62.9821542 | 390.5364551 |
| C | -35.2770067 | -62.0190528 | 385.6236016 |
| C | -33.9256935 | -62.1392196 | 385.2046319 |
| H | -36.7226022 | -60.8896756 | 386.7536853 |
| H | -36.0236584 | -62.7498869 | 385.2774372 |
| H | -33.6249229 | -62.9715555 | 384.5503267 |
| H | -31.9523902 | -61.2496691 | 385.2531488 |
| C | -39.0620801 | -55.2960787 | 389.9226771 |
| C | -39.0644168 | -56.0961711 | 388.7505431 |
| C | -39.3050685 | -53.8998146 | 389.7885989 |
| C | -39.3915521 | -55.5205626 | 387.4871000 |
| C | -39.6239384 | -54.1367470 | 387.3997662 |
| C | -39.5802458 | -53.2982232 | 388.5282589 |
| H | -39.4133262 | -53.2856114 | 390.6983748 |
| C | -39.5368738 | -56.4146912 | 386.2598904 |
| H | -39.8439631 | -53.6939783 | 386.4199290 |
| C | -39.2940449 | -55.7053130 | 384.9245816 |
| H | -40.0890792 | -54.9697588 | 384.6815841 |
| H | -39.2599935 | -56.4459197 | 384.1020216 |
| H | -38.3221320 | -55.1752715 | 384.9219250 |
| C | -40.9202098 | -57.0975195 | 386.2899041 |

|    |             |             |             |    |             |             |             |
|----|-------------|-------------|-------------|----|-------------|-------------|-------------|
| H  | -38.7729105 | -57.2144716 | 386.3375253 | O  | -36.2817571 | -52.3622012 | 387.9221490 |
| H  | -41.7339880 | -56.3450802 | 386.2303433 | H  | -30.8468737 | -49.9963697 | 386.3613393 |
| H  | -41.0641030 | -57.6823991 | 387.2204992 | H  | -34.8113028 | -48.7287396 | 387.5890865 |
| H  | -41.0284347 | -57.7898260 | 385.4302845 | H  | -31.5809586 | -52.3969825 | 386.4640503 |
| C  | -39.8972245 | -51.8091825 | 388.4620065 | H  | -32.4571002 | -48.1593695 | 386.9192161 |
| C  | -39.6721427 | -51.1838160 | 387.0802070 | H  | -33.9348832 | -52.9593313 | 387.1444768 |
| H  | -39.7829611 | -50.0827038 | 387.1406364 | Br | -35.6020619 | -57.4166155 | 384.3549606 |
| H  | -40.4233855 | -51.5395809 | 386.3439937 | Zn | -35.5857988 | -55.1440828 | 384.9734560 |
| H  | -38.6665548 | -51.3987439 | 386.6687536 | H  | -32.8088828 | -50.6582833 | 383.9680604 |
| C  | -41.3364245 | -51.5618412 | 388.9603690 | H  | -36.3532361 | -54.0520056 | 382.8770093 |
| H  | -39.2104481 | -51.3127112 | 389.1862273 | C  | -34.2192547 | -52.1166994 | 383.1496088 |
| H  | -41.5585374 | -50.4755314 | 388.9789601 | C  | -33.7898891 | -50.7151315 | 383.4407544 |
| H  | -41.4934137 | -51.9592354 | 389.9831837 | H  | -33.6520134 | -52.7982028 | 382.5008149 |
| H  | -42.0729261 | -52.0506754 | 388.2888665 | C  | -35.3804941 | -52.3890842 | 383.8096240 |
| C  | -38.8544765 | -55.8825943 | 391.3165866 | C  | -36.2325643 | -53.5857452 | 383.8765381 |
| C  | -37.7742706 | -55.1693698 | 392.1442071 | C  | -35.7442179 | -51.1413609 | 384.5478694 |
| H  | -37.6623602 | -55.6679103 | 393.1283319 | O  | -34.7947714 | -50.1788468 | 384.3061337 |
| H  | -38.0124163 | -54.1040499 | 392.3419960 | O  | -36.7024326 | -50.9207742 | 385.2697581 |
| H  | -36.7910398 | -55.2142407 | 391.6343195 | H  | -33.7199236 | -50.0695783 | 382.5352345 |
| C  | -40.2044928 | -55.9225028 | 392.0605247 | H  | -37.2349264 | -53.3008317 | 384.2564877 |
| H  | -38.5181285 | -56.9291825 | 391.1858044 | H  | -36.5049289 | -50.3369923 | 388.1494361 |
| H  | -40.0888230 | -56.4156149 | 393.0472734 |    |             |             |             |
| H  | -40.9721879 | -56.4787480 | 391.4848883 |    |             |             |             |
| H  | -40.5963287 | -54.8993586 | 392.2396608 |    |             |             |             |
| H  | -29.0043479 | -52.9571800 | 387.3155737 |    |             |             |             |
| H  | -29.7397114 | -57.4240407 | 391.1117085 |    |             |             |             |
| H  | -31.4331710 | -57.1414666 | 383.2869105 |    |             |             |             |
| C  | -29.0941912 | -53.4789097 | 388.2951752 |    |             |             |             |
| H  | -32.7439763 | -57.1581365 | 392.1618469 |    |             |             |             |
| H  | -28.9182232 | -51.5910388 | 389.3995802 |    |             |             |             |
| H  | -33.0677573 | -55.1713793 | 383.5822550 |    |             |             |             |
| C  | -30.0708664 | -54.6309592 | 388.0916571 |    |             |             |             |
| C  | -30.5280124 | -58.1175551 | 390.7510078 |    |             |             |             |
| C  | -29.6105066 | -52.4548798 | 389.3214762 |    |             |             |             |
| H  | -29.6938900 | -52.9035093 | 390.3330490 |    |             |             |             |
| C  | -30.4932917 | -55.4291818 | 389.1684787 |    |             |             |             |
| C  | -30.9977858 | -56.9342020 | 384.2861980 |    |             |             |             |
| H  | -27.3052074 | -54.7019153 | 387.9135938 |    |             |             |             |
| C  | -30.5735575 | -54.9376130 | 386.8168073 |    |             |             |             |
| C  | -27.6935653 | -53.9947265 | 388.6737345 |    |             |             |             |
| H  | -26.9720530 | -53.1567438 | 388.7686169 |    |             |             |             |
| H  | -30.2435921 | -54.3276130 | 385.9592961 |    |             |             |             |
| C  | -32.4217831 | -56.5097447 | 391.3209788 |    |             |             |             |
| H  | -30.8127003 | -58.7722347 | 391.6007153 |    |             |             |             |
| H  | -30.0784125 | -58.7539669 | 389.9620343 |    |             |             |             |
| C  | -31.3809198 | -56.5064230 | 389.0009718 |    |             |             |             |
| C  | -32.5050197 | -54.9252594 | 384.5073025 |    |             |             |             |
| C  | -31.4837355 | -55.9886651 | 386.5941537 |    |             |             |             |
| H  | -30.6727266 | -57.9002138 | 384.7194314 |    |             |             |             |
| H  | -30.0891989 | -56.3112679 | 384.1442214 |    |             |             |             |
| C  | -31.7525501 | -57.3499793 | 390.2188758 |    |             |             |             |
| C  | -31.8783355 | -56.7948920 | 387.6995953 |    |             |             |             |
| C  | -32.0239970 | -56.2202324 | 385.1845510 |    |             |             |             |
| H  | -33.3146758 | -55.9836105 | 390.9309743 |    |             |             |             |
| H  | -33.1612846 | -54.3313120 | 385.1757603 |    |             |             |             |
| H  | -31.7269218 | -55.7504220 | 391.7370034 |    |             |             |             |
| H  | -30.6122760 | -52.0708275 | 389.0432000 |    |             |             |             |
| H  | -31.6669826 | -54.2597545 | 384.2103042 |    |             |             |             |
| H  | -27.7173403 | -54.5294047 | 389.6463179 |    |             |             |             |
| H  | -32.4900069 | -58.1103542 | 389.8920327 |    |             |             |             |
| H  | -32.9136510 | -56.8772265 | 385.2675848 |    |             |             |             |
| H  | -30.1135507 | -55.2109676 | 390.1794587 |    |             |             |             |
| Zn | -37.0745059 | -53.2652062 | 389.5819995 |    |             |             |             |
| Br | -36.9377343 | -51.5484428 | 391.1786527 |    |             |             |             |
| C  | -31.8804904 | -50.2424315 | 386.6516746 |    |             |             |             |
| C  | -35.8588766 | -51.1946157 | 387.8365595 |    |             |             |             |
| C  | -32.2872017 | -51.5905212 | 386.7081413 |    |             |             |             |
| C  | -34.0899676 | -49.5250754 | 387.3482460 |    |             |             |             |
| C  | -34.4988889 | -50.8755173 | 387.4135106 |    |             |             |             |
| C  | -32.7803695 | -49.2097445 | 386.9703000 |    |             |             |             |
| C  | -33.5926721 | -51.9136167 | 387.0879922 |    |             |             |             |

### 14o-ma; COSMO

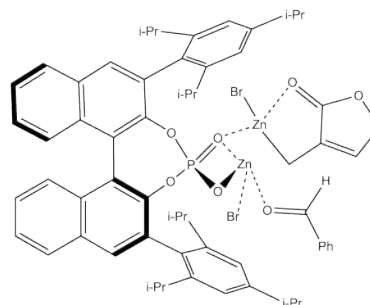

Energy (Hartree) = -11970.02072586

|    |            |            |             |
|----|------------|------------|-------------|
| C  | 6.5649238  | 9.4261756  | 266.9046615 |
| C  | 2.8253222  | 8.0468635  | 268.3868980 |
| C  | 6.5400457  | 8.4108734  | 267.8818478 |
| C  | 4.1422779  | 9.5337010  | 266.9181111 |
| C  | 4.1127279  | 8.5159980  | 267.9019739 |
| C  | 5.3688748  | 9.9858447  | 266.4193896 |
| C  | 5.3198196  | 7.9488898  | 268.3792144 |
| O  | 2.7021279  | 7.1561096  | 269.2522626 |
| H  | 7.5307753  | 9.7816426  | 266.5138933 |
| H  | 3.1961486  | 9.9607837  | 266.5495215 |
| H  | 7.4826364  | 7.9771651  | 268.2469236 |
| H  | 5.3983251  | 10.7738846 | 265.6525724 |
| H  | 5.2729126  | 7.1379271  | 269.1213850 |
| Br | 1.8127820  | 2.6659871  | 265.2277604 |
| C  | -0.1725616 | 1.6100408  | 269.2230934 |
| C  | 0.7472239  | 0.5623159  | 269.2518497 |
| C  | 0.4165416  | -0.5941582 | 270.0525167 |
| C  | 1.3403761  | -1.6539624 | 270.3001100 |
| C  | -0.8917655 | -0.6728315 | 270.6587702 |
| C  | -1.2348409 | -1.8246216 | 271.4289846 |
| C  | -1.8130517 | 0.4022833  | 270.4952737 |
| H  | -2.8216100 | 0.3087303  | 270.9257414 |
| C  | -1.4695036 | 1.5645131  | 269.8165057 |
| C  | 4.2689390  | 1.7288936  | 268.2731423 |
| C  | 4.6759948  | 0.6828706  | 267.4532932 |
| H  | 5.7194213  | 0.6509686  | 267.1039700 |
| C  | 3.7769065  | -0.3390594 | 267.0364731 |
| C  | 4.1776383  | -1.3447320 | 266.1069238 |
| C  | 2.4363839  | -0.3656854 | 267.5682883 |
| C  | 1.5432371  | -1.3775981 | 267.1067704 |
| C  | 2.0354547  | 0.6511338  | 268.5090975 |

|   |            |            |             |
|---|------------|------------|-------------|
| C | 2.9155780  | 1.7144145  | 268.7229206 |
| O | 0.1461994  | 2.7680392  | 268.5088810 |
| O | 2.5189480  | 2.7999844  | 269.5091151 |
| P | 1.2789006  | 3.7706321  | 269.0974666 |
| O | 0.9125003  | 4.5297869  | 270.3968185 |
| O | 1.5224568  | 4.8367316  | 267.9909298 |
| C | -0.3209246 | -2.8483974 | 271.6290605 |
| C | 0.9815505  | -2.7516806 | 271.0707173 |
| H | -2.2406932 | -1.8767108 | 271.8746144 |
| H | -0.5968828 | -3.7279331 | 272.2305543 |
| H | 2.3539501  | -1.5908789 | 269.8805698 |
| H | 1.7154794  | -3.5515338 | 271.2530966 |
| C | 1.9578877  | -2.3303938 | 266.1863582 |
| C | 3.2888328  | -2.3241198 | 265.6894435 |
| H | 0.5068737  | -1.3840346 | 267.4725775 |
| H | 1.2459947  | -3.0916711 | 265.8324770 |
| H | 3.6071358  | -3.0879141 | 264.9636196 |
| H | 5.2062954  | -1.3175206 | 265.7143395 |
| C | -2.5712145 | 3.6944392  | 270.6477748 |
| C | -2.4113379 | 2.7148639  | 269.6294252 |
| C | -3.4576855 | 4.7625204  | 270.4157285 |
| C | -3.1147321 | 2.8334598  | 268.3999637 |
| C | -3.9775250 | 3.9289628  | 268.2172573 |
| C | -4.1717557 | 4.9005535  | 269.2135613 |
| H | -3.5916758 | 5.5299742  | 271.1936839 |
| C | -2.9574206 | 1.8098417  | 267.2763461 |
| H | -4.5106748 | 4.0266550  | 267.2582245 |
| C | -2.2649585 | 2.4190860  | 266.0445115 |
| H | -2.8547755 | 3.2579987  | 265.6212718 |
| H | -2.1364335 | 1.6531167  | 265.2516467 |
| H | -1.2651394 | 2.8182756  | 266.2967641 |
| C | -4.3048960 | 1.1605934  | 266.9113675 |
| H | -2.3027349 | 0.9962689  | 267.6518364 |
| H | -5.0155842 | 1.9027028  | 266.4910985 |
| H | -4.7862606 | 0.6993958  | 267.7981409 |
| H | -4.1615589 | 0.3695188  | 266.1463309 |
| C | -5.0955703 | 6.0919919  | 268.9922831 |
| C | -4.4859683 | 7.0748440  | 267.9772231 |
| H | -5.1331089 | 7.9687205  | 267.8519939 |
| H | -4.3599148 | 6.5998494  | 266.9829066 |
| H | -3.4800063 | 7.4072827  | 268.3006263 |
| C | -6.5154381 | 5.6648962  | 268.5826236 |
| H | -5.1731172 | 6.6216716  | 269.9676607 |
| H | -7.1825376 | 6.5479292  | 268.4995919 |
| H | -6.9585335 | 4.9662990  | 269.3212856 |
| H | -6.5171367 | 5.1568695  | 267.5955694 |
| C | -1.8262902 | 3.5951695  | 271.9787134 |
| C | -1.4197616 | 4.9624619  | 272.5526416 |
| H | -0.7158542 | 4.8270446  | 273.3987527 |
| H | -2.2938616 | 5.5258793  | 272.9406964 |
| H | -0.9225171 | 5.5898893  | 271.7888884 |
| C | -2.6486230 | 2.8070979  | 273.0174645 |
| H | -0.8892890 | 3.0318424  | 271.7854189 |
| H | -2.0949040 | 2.7207674  | 273.9757210 |
| H | -2.8841137 | 1.7829572  | 272.6684617 |
| H | -3.6109679 | 3.3212438  | 273.2237671 |
| H | 8.5952316  | 6.1918752  | 269.1703769 |
| H | 6.9387220  | 1.5023841  | 272.2719653 |
| H | 6.0328645  | 3.3532173  | 264.3399354 |
| C | 8.3259699  | 5.5690843  | 270.0528823 |
| H | 3.8669661  | 1.8716890  | 272.9813933 |
| H | 8.6749025  | 7.2305142  | 271.4437111 |
| H | 4.3290546  | 5.1783842  | 265.0178805 |
| C | 7.2172928  | 4.6244020  | 269.6032045 |
| C | 6.1675697  | 0.9245593  | 271.7206642 |
| C | 7.8688317  | 6.5165145  | 271.1760606 |
| H | 7.6046961  | 5.9534015  | 272.0951620 |
| C | 6.6137312  | 3.7304449  | 270.5062682 |
| C | 6.4195395  | 3.3369788  | 265.3798264 |
| H | 9.9417230  | 4.1342314  | 269.6409239 |
| C | 6.7821950  | 4.5964610  | 268.2685407 |

|    |            |           |             |
|----|------------|-----------|-------------|
| C  | 9.5895760  | 4.7898134 | 270.4625846 |
| H  | 10.4139565 | 5.4826668 | 270.7310354 |
| H  | 7.2322535  | 5.2999968 | 267.5488204 |
| C  | 4.3174829  | 2.5911760 | 272.2665704 |
| H  | 5.7329471  | 0.1883471 | 272.4282201 |
| H  | 6.6807978  | 0.3638102 | 270.9131931 |
| C  | 5.6340220  | 2.8049169 | 270.1063297 |
| C  | 4.7929590  | 5.1771274 | 266.0254314 |
| C  | 5.7904380  | 3.7023659 | 267.8175519 |
| H  | 6.7717374  | 2.3076882 | 265.5950982 |
| H  | 7.3031506  | 4.0087162 | 265.4241193 |
| C  | 5.0698879  | 1.8421392 | 271.1510544 |
| C  | 5.2305414  | 2.7779646 | 268.7394409 |
| C  | 5.3253251  | 3.7765655 | 266.3669198 |
| H  | 3.5030070  | 3.2138873 | 271.8474463 |
| H  | 4.0207823  | 5.4914947 | 266.7560605 |
| H  | 4.9985828  | 3.2518784 | 272.8431870 |
| H  | 6.9764174  | 7.1038817 | 270.8791675 |
| H  | 5.5911325  | 5.9489659 | 266.0327207 |
| H  | 9.3910593  | 4.1455504 | 271.3445316 |
| H  | 4.3356524  | 1.1817859 | 270.6477838 |
| H  | 4.4684149  | 3.0828680 | 266.2472350 |
| Zn | 0.8439783  | 6.3377074 | 269.5430728 |
| Br | -0.7544569 | 7.9945315 | 269.4668064 |
| H  | 6.9314608  | 3.7378574 | 271.5614446 |
| H  | -1.6923623 | 9.2464101 | 266.9326371 |
| H  | 1.7409861  | 6.6030311 | 264.0889544 |
| Zn | 1.4427345  | 4.8930684 | 265.8912877 |
| C  | -0.0033027 | 8.7800574 | 265.6178081 |
| C  | -1.4666980 | 8.8138219 | 265.9324875 |
| H  | 0.6011400  | 9.6902534 | 265.4946630 |
| C  | 0.4030468  | 7.4879559 | 265.4871064 |
| C  | 1.6682242  | 6.7802551 | 265.1869724 |
| C  | -0.8002066 | 6.6558262 | 265.7697343 |
| O  | -1.8858814 | 7.4350671 | 265.9565632 |
| O  | -0.8305703 | 5.4280210 | 265.8642686 |
| H  | -2.0686036 | 9.3587201 | 265.1724451 |
| H  | 2.5680036  | 7.3585034 | 265.4739874 |
| H  | 1.9106192  | 8.5166349 | 267.9424833 |

### 14o-ma

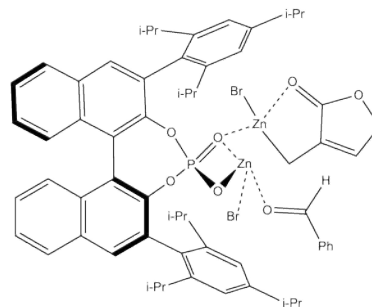

Energy (Hartree) = -11970.00577838

|    |            |            |             |
|----|------------|------------|-------------|
| C  | 6.2125837  | 9.6237909  | 266.8158968 |
| C  | 2.7466019  | 8.1796024  | 268.8189456 |
| C  | 6.1321882  | 8.2640595  | 267.1735356 |
| C  | 4.0327654  | 10.0352114 | 267.7958996 |
| C  | 3.9500152  | 8.6704823  | 268.1602547 |
| C  | 5.1659875  | 10.5109242 | 267.1273212 |
| C  | 5.0074474  | 7.7815150  | 267.8471750 |
| O  | 2.6228660  | 7.0025876  | 269.2039044 |
| H  | 7.1015787  | 9.9959236  | 266.2836531 |
| H  | 3.2008778  | 10.7144015 | 268.0427847 |
| H  | 6.9530512  | 7.5770653  | 266.9204127 |
| H  | 5.2375675  | 11.5711739 | 266.8427670 |
| H  | 4.9217480  | 6.7202398  | 268.1276802 |
| Br | 1.8107724  | 2.6102537  | 265.2223506 |
| C  | -0.2029289 | 1.4819896  | 269.1815421 |

|   |            |            |             |    |            |           |             |
|---|------------|------------|-------------|----|------------|-----------|-------------|
| C | 0.7190983  | 0.4388517  | 269.2484381 | H  | -3.8237002 | 3.2707556 | 273.1719156 |
| C | 0.3813184  | -0.6910069 | 270.0849943 | H  | 8.2672234  | 6.3907119 | 268.8265421 |
| C | 1.3012467  | -1.7425393 | 270.3760622 | H  | 6.8360086  | 1.8468904 | 272.2306444 |
| C | -0.9321837 | -0.7484539 | 270.6829687 | H  | 6.3672725  | 2.6018306 | 264.2936358 |
| C | -1.2831418 | -1.8759049 | 271.4841381 | C  | 7.9939619  | 5.8487316 | 269.7598554 |
| C | -1.8479569 | 0.3266947  | 270.4901319 | H  | 3.7476250  | 2.1689288 | 272.9449377 |
| H | -2.8535545 | 0.2546863  | 270.9308818 | H  | 8.0995311  | 7.6897028 | 270.9500004 |
| C | -1.4969548 | 1.4693776  | 269.7838189 | H  | 4.6368453  | 4.5349138 | 264.4783580 |
| C | 4.2425663  | 1.5965783  | 268.2361430 | C  | 6.9999830  | 4.7631604 | 269.3648782 |
| C | 4.6683119  | 0.5032528  | 267.4913952 | C  | 6.0738535  | 1.2029206 | 271.7439043 |
| H | 5.7161863  | 0.4570195  | 267.1593633 | C  | 7.3802819  | 6.8740652 | 270.7292888 |
| C | 3.7832232  | -0.5476813 | 267.1215159 | H  | 7.1065642  | 6.4023658 | 271.6957669 |
| C | 4.2052504  | -1.6022068 | 266.2585124 | C  | 6.3829697  | 3.9518753 | 270.3329157 |
| C | 2.4334434  | -0.5497324 | 267.6285574 | C  | 6.6355065  | 2.7462212 | 265.3604317 |
| C | 1.5519822  | -1.5872662 | 267.2030886 | H  | 9.7488695  | 4.5300627 | 269.6192768 |
| C | 2.0142175  | 0.5097460  | 268.5138446 | C  | 6.6856445  | 4.5198279 | 268.0191032 |
| C | 2.8843373  | 1.5915162  | 268.6792810 | C  | 9.2864773  | 5.2398401 | 270.3341012 |
| O | 0.1180891  | 2.6166150  | 268.4308998 | H  | 10.0298376 | 6.0298259 | 270.5688849 |
| O | 2.4858404  | 2.7075241  | 269.4160640 | H  | 7.1721936  | 5.1340407 | 267.2431222 |
| P | 1.2087000  | 3.6432207  | 269.0476998 | C  | 4.1776739  | 2.8484070 | 272.1804909 |
| O | 0.8300405  | 4.3537280  | 270.3703322 | H  | 5.6705125  | 0.5168498 | 272.5172440 |
| O | 1.4056087  | 4.7606602  | 267.9796008 | H  | 6.5921895  | 0.5912486 | 270.9779136 |
| C | -0.3736879 | -2.8944683 | 271.7235978 | C  | 5.4871927  | 2.9237657 | 269.9934984 |
| C | 0.9336745  | -2.8156386 | 271.1760957 | C  | 5.0342465  | 4.7022124 | 265.4996122 |
| H | -2.2925002 | -1.9119173 | 271.9233484 | C  | 5.7742589  | 3.5214634 | 267.6200169 |
| H | -0.6571144 | -3.7548350 | 272.3487928 | H  | 6.9261368  | 1.7597532 | 265.7741125 |
| H | 2.3187522  | -1.6926789 | 269.9649225 | H  | 7.5342453  | 3.3978294 | 265.3997287 |
| H | 1.6652608  | -3.6096782 | 271.3901798 | C  | 4.9429577  | 2.0409170 | 271.1171620 |
| C | 1.9875119  | -2.5877302 | 266.3456384 | C  | 5.1725974  | 2.7056894 | 268.6189471 |
| C | 3.3282021  | -2.6061154 | 265.8780857 | C  | 5.4593721  | 3.3688112 | 266.1336966 |
| H | 0.5084372  | -1.5761910 | 267.5471937 | H  | 3.3450096  | 3.4202464 | 271.7271567 |
| H | 1.2837939  | -3.3682685 | 266.0186829 | H  | 4.2309748  | 5.1838506 | 266.0913630 |
| H | 3.6631744  | -3.4077443 | 265.2024209 | H  | 4.8420482  | 3.5623686 | 272.7111740 |
| H | 5.2412378  | -1.5916702 | 265.8849646 | H  | 6.4618805  | 7.3306877 | 270.3086912 |
| C | -2.5882054 | 3.5781223  | 270.6710245 | H  | 5.8749426  | 5.4243016 | 265.4224897 |
| C | -2.3968485 | 2.6533982  | 269.6065475 | H  | 9.0806010  | 4.6826746 | 271.2718059 |
| C | -3.4038732 | 4.7024009  | 270.4429289 | H  | 4.2266270  | 1.3208426 | 270.6751201 |
| C | -3.0037313 | 2.8807597  | 268.3405600 | H  | 4.5870752  | 2.6911277 | 266.0366344 |
| C | -3.8039469 | 4.0229688  | 268.1689880 | Zn | 0.7587367  | 6.1835820 | 269.5442225 |
| C | -4.0198551 | 4.9471620  | 269.2050477 | Br | -0.7351538 | 7.9063611 | 269.8689903 |
| H | -3.5534723 | 5.4316012  | 271.2541294 | H  | 6.6208007  | 4.1116595 | 271.3967680 |
| C | -2.8288960 | 1.9145877  | 267.1702653 | H  | -1.1047124 | 9.3280912 | 267.4100667 |
| H | -4.2658169 | 4.1998928  | 267.1847612 | H  | 2.0431338  | 6.6746158 | 264.2475368 |
| C | -2.2181697 | 2.6002685  | 265.9369100 | Zn | 1.5646798  | 4.8406437 | 265.8820641 |
| H | -2.8813297 | 3.3931643  | 265.5338417 | C  | 0.5766044  | 8.8507724 | 266.0809865 |
| H | -2.0427428 | 1.8617516  | 265.1280833 | C  | -0.8853410 | 9.0254012 | 266.3613827 |
| H | -1.2474608 | 3.0714075  | 266.1766222 | H  | 1.2996273  | 9.6785204 | 266.1062262 |
| C | -4.1593765 | 1.2134167  | 266.8376231 | C  | 0.8230628  | 7.5535666 | 265.7487669 |
| H | -2.1212015 | 1.1207679  | 267.4868784 | C  | 1.9976444  | 6.7496564 | 265.3583228 |
| H | -4.9260301 | 1.9428380  | 266.5020650 | C  | -0.4859801 | 6.8473296 | 265.8756883 |
| H | -4.5685709 | 0.6809682  | 267.7205757 | O  | -1.4724059 | 7.7259628 | 266.1640876 |
| H | -4.0204202 | 0.4739646  | 266.0217762 | O  | -0.6684313 | 5.6352950 | 265.7852620 |
| C | -4.8771177 | 6.1877296  | 268.9891154 | H  | -1.3791252 | 9.7497985 | 265.6758286 |
| C | -4.2571861 | 7.1174271  | 267.9321189 | H  | 2.9539615  | 7.1950503 | 265.6937814 |
| H | -4.8584405 | 8.0439564  | 267.8180769 | H  | 1.8974295  | 8.8975695 | 268.9600313 |
| H | -4.2025012 | 6.6263916  | 266.9387504 |    |            |           |             |
| H | -3.2231927 | 7.4002470  | 268.2083760 |    |            |           |             |
| C | -6.3309945 | 5.8219673  | 268.6411828 |    |            |           |             |
| H | -4.8909298 | 6.7397867  | 269.9549733 |    |            |           |             |
| H | -6.9558429 | 6.7339804  | 268.5424410 |    |            |           |             |
| H | -6.7837986 | 5.1755189  | 269.4200151 |    |            |           |             |
| H | -6.3876231 | 5.2744276  | 267.6771410 |    |            |           |             |
| C | -1.9460542 | 3.3756619  | 272.0436686 |    |            |           |             |
| C | -1.4430762 | 4.6821143  | 272.6802940 |    |            |           |             |
| H | -0.8426019 | 4.4584406  | 273.5855682 |    |            |           |             |
| H | -2.2787156 | 5.3396390  | 272.9977972 |    |            |           |             |
| H | -0.8072168 | 5.2525576  | 271.9786190 |    |            |           |             |
| C | -2.9141020 | 2.6567087  | 273.0040052 |    |            |           |             |
| H | -1.0602718 | 2.7226169  | 271.8980137 |    |            |           |             |
| H | -2.4352004 | 2.4792401  | 273.9895852 |    |            |           |             |
| H | -3.2445261 | 1.6777411  | 272.6054398 |    |            |           |             |

### 14o-mi; COSMO

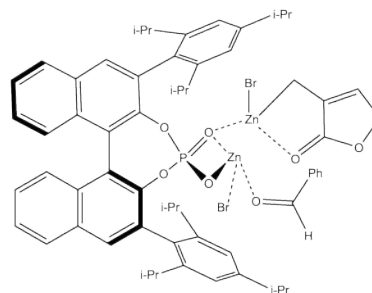

Energy (Hartree) = -11970.01318914

|   |            |            |             |
|---|------------|------------|-------------|
| C | -3.6154495 | -7.1093195 | 468.7891409 |
| C | -3.2878128 | -2.9944722 | 467.7328602 |



|    |             |            |             |    |             |             |             |
|----|-------------|------------|-------------|----|-------------|-------------|-------------|
| C  | -3.9816626  | -6.7030104 | 467.4913660 | H  | -8.9491345  | -4.6485867  | 460.2360237 |
| C  | -2.9932997  | -4.8331121 | 469.3527070 | H  | -7.5466315  | -4.2079447  | 461.2688275 |
| C  | -3.3740595  | -4.4154329 | 468.0545077 | C  | -10.1774500 | -2.1268082  | 460.2226651 |
| C  | -3.1172327  | -6.1784894 | 469.7180540 | H  | -9.6938917  | -3.1442672  | 462.0409527 |
| C  | -3.8597825  | -5.3625247 | 467.1232154 | H  | -9.6940847  | -1.6589001  | 459.3396541 |
| O  | -3.6073322  | -2.4584734 | 466.6574029 | H  | -10.8067646 | -1.3540137  | 460.7092344 |
| H  | -3.7222891  | -8.1665520 | 469.0734192 | H  | -10.8451564 | -2.9330645  | 459.8536836 |
| H  | -2.6248332  | -4.0886084 | 470.0753204 | C  | -5.6336634  | 0.8823803   | 460.3541552 |
| H  | -4.3716461  | -7.4359119 | 466.7715211 | C  | -4.6714856  | -0.0909278  | 459.6511696 |
| H  | -2.8288208  | -6.5054625 | 470.7283558 | H  | -3.9453169  | 0.4624451   | 459.0202507 |
| H  | -4.1483541  | -5.0543434 | 466.1089529 | H  | -5.2188337  | -0.7929504  | 458.9875328 |
| C  | -6.8401209  | -4.9991909 | 471.2306438 | H  | -4.1062250  | -0.6938775  | 460.3897995 |
| C  | -6.8248713  | -4.4518898 | 469.9837331 | C  | -6.4254463  | 1.7243622   | 459.3363961 |
| C  | -5.8202392  | -3.3599604 | 470.0356085 | H  | -5.0180420  | 1.5796791   | 460.9636381 |
| O  | -5.2042652  | -3.3249733 | 471.2403296 | H  | -5.7407066  | 2.2849243   | 458.6662542 |
| C  | -5.8159960  | -4.3222396 | 472.0864693 | H  | -7.0865601  | 2.4556084   | 459.8442670 |
| O  | -5.5669943  | -2.5495286 | 469.1404658 | H  | -7.0659364  | 1.0787567   | 458.6989861 |
| C  | -7.5344826  | -4.6733766 | 468.7084299 | C  | -7.4847913  | 0.3592225   | 465.0456739 |
| H  | -8.5046975  | -5.1910211 | 468.8332811 | C  | -6.0851792  | 0.4503673   | 465.6716081 |
| H  | -7.4676470  | -5.8270795 | 471.5882134 | H  | -6.1726526  | 0.6381705   | 466.7607330 |
| H  | -6.2346780  | -3.7994387 | 472.9748623 | H  | -5.4612030  | 1.2507139   | 465.2233994 |
| H  | -5.0230038  | -5.0159516 | 472.4457369 | H  | -5.5251879  | -0.4977612  | 465.5476144 |
| Zn | -7.5351160  | -2.8645748 | 467.7944022 | C  | -8.2250103  | 1.7003676   | 465.2016543 |
| H  | -6.9005287  | -5.2933831 | 468.0393096 | H  | -8.0378146  | -0.3903056  | 465.6431839 |
| Br | -8.6697633  | -0.8586019 | 468.2517608 | H  | -8.3100525  | 1.9681636   | 466.2748934 |
| C  | -8.9951297  | -3.2723163 | 464.3774101 | H  | -9.2495310  | 1.6558718   | 464.7796608 |
| C  | -9.8055538  | -4.0427810 | 465.2122299 | H  | -7.6867199  | 2.5195399   | 464.6793333 |
| C  | -10.8108975 | -3.3558772 | 465.9840606 | H  | -2.9697047  | -10.8080972 | 465.1940696 |
| C  | -11.5495305 | -3.9931024 | 467.0235004 | H  | -7.9238032  | -10.9252074 | 468.5835095 |
| C  | -11.0538540 | -1.9604626 | 465.7151663 | H  | -7.3879450  | -8.3719437  | 461.3413486 |
| C  | -12.0551520 | -1.2755844 | 466.4651879 | C  | -3.5491371  | -10.8824087 | 466.1402698 |
| C  | -10.2745501 | -1.2824256 | 464.7347400 | H  | -7.7911479  | -8.1618359  | 470.1728286 |
| H  | -10.4955939 | -0.2257784 | 464.5235889 | H  | -1.7214984  | -11.1088553 | 467.3302114 |
| C  | -9.2054074  | -1.8932088 | 464.0861966 | H  | -5.4102216  | -6.7642224  | 461.5923695 |
| C  | -8.3463321  | -7.6159516 | 465.4146403 | C  | -4.7516708  | -9.9573561  | 465.9913579 |
| C  | -9.4864721  | -8.3662964 | 465.1547905 | C  | -8.5866163  | -10.0743591 | 468.3196722 |
| H  | -9.4100744  | -9.4645040 | 465.1497513 | C  | -2.6165043  | -10.4547215 | 467.2865564 |
| C  | -10.7355727 | -7.7625470 | 464.8466771 | H  | -3.1257460  | -10.5283526 | 468.2708066 |
| C  | -11.8736303 | -8.5568270 | 464.5131805 | C  | -5.6720092  | -9.7763149  | 467.0402684 |
| C  | -10.8372988 | -6.3247045 | 464.8302684 | C  | -7.1420761  | -8.8334534  | 462.3200649 |
| C  | -12.0747274 | -5.7506418 | 464.4050113 | H  | -4.6341802  | -12.6688308 | 465.4531772 |
| C  | -9.6831625  | -5.5280576 | 465.1938574 | C  | -4.9830100  | -9.2704827  | 464.7854321 |
| C  | -8.4716520  | -6.1928600 | 465.4187439 | C  | -3.9935888  | -12.3482315 | 466.2992571 |
| O  | -7.8736406  | -3.8939383 | 463.7937154 | H  | -3.1155602  | -13.0253642 | 466.3438480 |
| O  | -7.2954297  | -5.4998340 | 465.7143069 | H  | -4.2606934  | -9.3948577  | 463.9635196 |
| P  | -6.7239454  | -4.1996548 | 464.9123868 | C  | -7.0523278  | -8.3428255  | 469.3649040 |
| O  | -6.5365868  | -3.0068856 | 465.9058306 | H  | -9.3066129  | -9.9345918  | 469.1524753 |
| O  | -5.3702873  | -4.4655026 | 464.2296994 | H  | -9.1608643  | -10.3653238 | 467.4174719 |
| C  | -12.7669934 | -1.9253758 | 467.4615873 | C  | -6.8094647  | -8.9577255  | 466.9027434 |
| C  | -12.5010539 | -3.2908338 | 467.7501097 | C  | -5.1271811  | -7.3018425  | 462.5202660 |
| H  | -12.2311304 | -0.2093422 | 466.2551590 | C  | -6.1173179  | -8.4596590  | 464.5872062 |
| H  | -13.5252602 | -1.3804586 | 468.0440771 | H  | -8.0896585  | -9.1670401  | 462.7885549 |
| H  | -11.3447070 | -5.0484616 | 467.2548277 | H  | -6.5215550  | -9.7339975  | 462.1295028 |
| H  | -13.0491763 | -3.7943340 | 468.5610530 | C  | -7.7696415  | -8.7911368  | 468.0802368 |
| C  | -13.1596276 | -6.5488545 | 464.0685476 | C  | -7.0473724  | -8.3227209  | 465.6536040 |
| C  | -13.0695270 | -7.9643820 | 464.1387622 | C  | -6.3868427  | -7.8337493  | 463.2191673 |
| H  | -12.1669691 | -4.6593976 | 464.3297949 | H  | -6.4882294  | -7.4031406  | 469.2059700 |
| H  | -14.0970064 | -6.0764225 | 463.7374861 | H  | -4.5819244  | -6.5870274  | 463.1655867 |
| H  | -13.9401477 | -8.5852974 | 463.8784081 | H  | -6.3434584  | -9.1130300  | 469.7345828 |
| H  | -11.7756487 | -9.6533361 | 464.5451974 | H  | -2.2704602  | -9.4092306  | 467.1595552 |
| C  | -7.4773234  | -0.1072374 | 463.5938524 | H  | -4.4377426  | -8.1198592  | 462.2251704 |
| C  | -8.3012499  | -1.1754915 | 463.1348641 | H  | -4.5753609  | -12.4905903 | 467.2341967 |
| C  | -6.6334908  | 0.5386868  | 462.6711635 | H  | -8.4839193  | -7.9851086  | 467.8113740 |
| C  | -8.2522321  | -1.5730475 | 461.7670827 | H  | -7.0626575  | -6.9667535  | 463.3738133 |
| C  | -7.3911077  | -0.8898012 | 460.8920147 | Zn | -4.5335078  | -2.6685217  | 464.8859675 |
| C  | -6.5670009  | 0.1654202  | 461.3204756 | Br | -3.4920527  | -1.3825220  | 463.2913835 |
| H  | -5.9826920  | 1.3540298  | 463.0247848 | H  | -2.8774495  | -2.3315715  | 468.5315095 |
| C  | -9.1297319  | -2.6897792 | 461.2014381 | H  | -5.5013456  | -10.2898263 | 468.0002445 |
| H  | -7.3605846  | -1.1978640 | 459.8345113 |    |             |             |             |
| C  | -8.2950791  | -3.8107047 | 460.5553595 |    |             |             |             |
| H  | -7.7542220  | -3.4500074 | 459.6556505 |    |             |             |             |

14o-mi

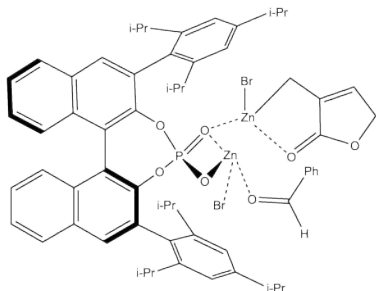

Energy (Hartree) = -11969.99895164

|    |             |            |             |
|----|-------------|------------|-------------|
| C  | -3.5735711  | -7.1188321 | 468.7458258 |
| C  | -3.3654336  | -2.9781346 | 467.7510493 |
| C  | -3.9271140  | -6.7053561 | 467.4475141 |
| C  | -3.0492480  | -4.8305638 | 469.3577692 |
| C  | -3.4126152  | -4.4072548 | 468.0574085 |
| C  | -3.1321997  | -6.1849107 | 469.6999001 |
| C  | -3.8455261  | -5.3552453 | 467.1023422 |
| O  | -3.6686508  | -2.4481031 | 466.6713033 |
| H  | -3.6488923  | -8.1838700 | 469.0102509 |
| H  | -2.7312678  | -4.0834118 | 470.1015111 |
| H  | -4.2784560  | -7.4395011 | 466.7091259 |
| H  | -2.8572545  | -6.5164615 | 470.7126119 |
| H  | -4.1309369  | -5.0377220 | 466.0898759 |
| C  | -7.0539809  | -4.9628907 | 471.2313515 |
| C  | -6.9695757  | -4.4369741 | 469.9779755 |
| C  | -5.9105469  | -3.3961595 | 470.0479040 |
| O  | -5.3256353  | -3.3834115 | 471.2717969 |
| C  | -6.0203095  | -4.3275256 | 472.1100339 |
| O  | -5.5939795  | -2.6101350 | 469.1556626 |
| C  | -7.6448275  | -4.6374198 | 468.6848487 |
| H  | -8.6208172  | -5.1511314 | 468.7733462 |
| H  | -7.7359325  | -5.7515758 | 471.5775160 |
| H  | -6.4372339  | -3.7650791 | 472.9757304 |
| H  | -5.2806855  | -5.0583439 | 472.5093309 |
| Zn | -7.6083305  | -2.8160822 | 467.7877240 |
| H  | -6.9910865  | -5.2422237 | 468.0210907 |
| Br | -8.6517098  | -0.7803077 | 468.2642342 |
| C  | -9.0013273  | -3.2689070 | 464.3864375 |
| C  | -9.8020819  | -4.0367446 | 465.2328290 |
| C  | -10.7981383 | -3.3470542 | 466.0143083 |
| C  | -11.5265768 | -3.9809218 | 467.0627934 |
| C  | -11.0383873 | -1.9504431 | 465.7486134 |
| C  | -12.0239400 | -1.2612393 | 466.5145561 |
| C  | -10.2690743 | -1.2751996 | 464.7582283 |
| H  | -10.4855235 | -0.2166025 | 464.5527385 |
| C  | -9.2109855  | -1.8895566 | 464.0957208 |
| C  | -8.3286130  | -7.6052178 | 465.4226921 |
| C  | -9.4688654  | -8.3598220 | 465.1778462 |
| H  | -9.3869935  | -9.4577377 | 465.1718907 |
| C  | -10.7240146 | -7.7608518 | 464.8870243 |
| C  | -11.8641063 | -8.5579274 | 464.5696898 |
| C  | -10.8297650 | -6.3234332 | 464.8714009 |
| C  | -12.0746484 | -5.7536818 | 464.4629891 |
| C  | -9.6739998  | -5.5218149 | 465.2191138 |
| C  | -8.4567858  | -6.1821181 | 465.4300315 |
| O  | -7.8817344  | -3.8904633 | 463.8008003 |
| O  | -7.2768313  | -5.4925762 | 465.7113012 |
| P  | -6.7276937  | -4.1705533 | 464.9238366 |
| O  | -6.5695975  | -2.9804099 | 465.9184342 |
| O  | -5.3689085  | -4.4191093 | 464.2431622 |
| C  | -12.7251050 | -1.9074191 | 467.5200461 |
| C  | -12.4639839 | -3.2743267 | 467.8026031 |
| H  | -12.1935658 | -0.1929437 | 466.3107799 |
| H  | -13.4692162 | -1.3575373 | 468.1156713 |
| H  | -11.3238801 | -5.0376411 | 467.2893523 |
| H  | -13.0031926 | -3.7754785 | 468.6208321 |

|   |             |             |             |
|---|-------------|-------------|-------------|
| C | -13.1615360 | -6.5550649  | 464.1426647 |
| C | -13.0665538 | -7.9697256  | 464.2119560 |
| H | -12.1702249 | -4.6627186  | 464.3896481 |
| H | -14.1048269 | -6.0852651  | 463.8251218 |
| H | -13.9387106 | -8.5934813  | 463.9640396 |
| H | -11.7621287 | -9.6541096  | 464.6007564 |
| C | -7.4641838  | -0.1251073  | 463.5913910 |
| C | -8.3056708  | -1.1822409  | 463.1383679 |
| C | -6.6004674  | 0.4911689   | 462.6671754 |
| C | -8.2601576  | -1.5921131  | 461.7742331 |
| C | -7.3806951  | -0.9359281  | 460.8976425 |
| C | -6.5331255  | 0.1019881   | 461.3213894 |
| H | -5.9329247  | 1.2942772   | 463.0167420 |
| C | -9.1601554  | -2.6940232  | 461.2147021 |
| H | -7.3511480  | -1.2545312  | 459.8433646 |
| C | -8.3511770  | -3.8326993  | 460.5672371 |
| H | -7.8087218  | -3.4860237  | 459.6631243 |
| H | -9.0228332  | -4.6588955  | 460.2540305 |
| H | -7.6052117  | -4.2415223  | 461.2766016 |
| C | -10.2009093 | -2.1121529  | 460.2396690 |
| H | -9.7296603  | -3.1359075  | 462.0575178 |
| H | -9.7121291  | -1.6527373  | 459.3553054 |
| H | -10.8131421 | -1.3270467  | 460.7278395 |
| H | -10.8852937 | -2.9051554  | 459.8724454 |
| C | -5.5734444  | 0.7833776   | 460.3555214 |
| C | -4.6369627  | -0.2236745  | 459.6658866 |
| H | -3.8898660  | 0.3027048   | 459.0363102 |
| H | -5.2005368  | -0.9128600  | 459.0024376 |
| H | -4.0959080  | -0.8380271  | 460.4128967 |
| C | -6.3340319  | 1.6424363   | 459.3285962 |
| H | -4.9397988  | 1.4648561   | 460.9644129 |
| H | -5.6298907  | 2.1775909   | 458.6578410 |
| H | -6.9759275  | 2.3961532   | 459.8278545 |
| H | -6.9910599  | 1.0128020   | 458.6921867 |
| C | -7.4764206  | 0.3626939   | 465.0358566 |
| C | -6.0822734  | 0.4549623   | 465.6726258 |
| H | -6.1790587  | 0.6653108   | 466.7566419 |
| H | -5.4444830  | 1.2378614   | 465.2136609 |
| H | -5.5297034  | -0.5012754  | 465.5776669 |
| C | -8.2086463  | 1.7111515   | 465.1651433 |
| H | -8.0389632  | -0.3723090  | 465.6425952 |
| H | -8.3061058  | 1.9919509   | 466.2337512 |
| H | -9.2273318  | 1.6695825   | 464.7288782 |
| H | -7.6582066  | 2.5195098   | 464.6388826 |
| H | -2.9436217  | -10.7754565 | 465.1244486 |
| H | -7.8249211  | -10.9238362 | 468.6017915 |
| H | -7.3987454  | -8.3250856  | 461.3318840 |
| C | -3.5200714  | -10.8686651 | 466.0709732 |
| H | -7.7178022  | -8.1463879  | 470.1637966 |
| H | -1.6877311  | -11.1253256 | 467.2487819 |
| H | -5.4335317  | -6.7015854  | 461.5841560 |
| C | -4.7220776  | -9.9394054  | 465.9447910 |
| C | -8.5059079  | -10.0871616 | 468.3393073 |
| C | -2.5812781  | -10.4683946 | 467.2218379 |
| H | -3.0859673  | -10.5624366 | 468.2067434 |
| C | -5.6309937  | -9.7673316  | 467.0047379 |
| C | -7.1418709  | -8.7936168  | 462.3042625 |
| H | -4.6118120  | -12.6366449 | 465.3491902 |
| C | -4.9670476  | -9.2428534  | 464.7473744 |
| C | -3.9673588  | -12.3365237 | 466.1994997 |
| H | -3.0919470  | -13.0178832 | 466.2273576 |
| H | -4.2535332  | -9.3586177  | 463.9165976 |
| C | -6.9900542  | -8.3134075  | 469.3429087 |
| H | -9.2171911  | -9.9534617  | 469.1804969 |
| H | -9.0870303  | -10.3977866 | 467.4482047 |
| C | -6.7711684  | -8.9500349  | 466.8852284 |
| C | -5.1391038  | -7.2443521  | 462.5052844 |
| C | -6.1045194  | -8.4327484  | 464.5668344 |
| H | -8.0834669  | -9.1387342  | 462.7762576 |
| H | -6.5162338  | -9.6876776  | 462.1006841 |
| C | -7.7176968  | -8.7913849  | 468.0749260 |

|    |            |             |             |
|----|------------|-------------|-------------|
| C  | -7.0242227 | -8.3073858  | 465.6433895 |
| C  | -6.3886597 | -7.7958707  | 463.2069622 |
| H  | -6.4552168 | -7.3597846  | 469.1670885 |
| H  | -4.5980716 | -6.5274370  | 463.1516658 |
| H  | -6.2534210 | -9.0608450  | 469.7053554 |
| H  | -2.2326412 | -9.4214937  | 467.1165246 |
| H  | -4.4420776 | -8.0515294  | 462.1981198 |
| H  | -4.5479638 | -12.4971456 | 467.1320689 |
| H  | -8.4514324 | -8.0023122  | 467.8088556 |
| H  | -7.0711898 | -6.9368725  | 463.3744884 |
| Zn | -4.5367094 | -2.6190134  | 464.8528019 |
| Br | -3.4081338 | -1.3345536  | 463.3304473 |
| H  | -3.0005474 | -2.3102073  | 468.5682096 |
| H  | -5.4504230 | -10.2886540 | 467.9588140 |

### 14p-ma; COSMO

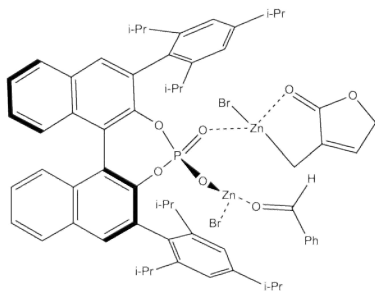

Energy (Hartree) = -11970.01407347

|   |            |            |            |
|---|------------|------------|------------|
| C | 0.0946228  | 1.0591854  | 89.4938998 |
| C | 0.8711943  | -0.0297130 | 89.9012848 |
| C | 0.3198166  | -0.9068497 | 90.9075095 |
| C | 1.0871199  | -1.9272213 | 91.5453852 |
| C | -1.0540127 | -0.7300081 | 91.3129417 |
| C | -1.6144247 | -1.6175350 | 92.2802968 |
| C | -1.8181935 | 0.3433121  | 90.7688363 |
| H | -2.8710745 | 0.4477987  | 91.0699654 |
| C | -1.2585413 | 1.2778940  | 89.9074184 |
| C | 4.4206689  | 0.6202760  | 88.5660913 |
| C | 4.7731543  | -0.6472779 | 88.1160609 |
| H | 5.7635974  | -0.7947633 | 87.6574712 |
| C | 3.8584965  | -1.7366594 | 88.1420505 |
| C | 4.2089417  | -3.0043578 | 87.5864181 |
| C | 2.5287818  | -1.5329252 | 88.6652603 |
| C | 1.5848414  | -2.5953541 | 88.5217194 |
| C | 2.2023019  | -0.2632716 | 89.2753997 |
| C | 3.1461478  | 0.7695854  | 89.1944746 |
| O | 0.6396194  | 1.9858591  | 88.6017361 |
| O | 2.8858326  | 1.9941320  | 89.7943703 |
| P | 1.7325867  | 3.0325636  | 89.2359553 |
| O | 1.1565864  | 3.6629424  | 90.5207166 |
| O | 2.2601229  | 3.9506491  | 88.1549923 |
| C | -0.8478812 | -2.6172927 | 92.8608006 |
| C | 0.5186924  | -2.7596653 | 92.5002226 |
| H | -2.6679877 | -1.4800579 | 92.5705812 |
| H | -1.2906518 | -3.2895111 | 93.6115601 |
| H | 2.1472242  | -2.0435101 | 91.2796932 |
| H | 1.1343128  | -3.5330264 | 92.9845320 |
| C | 1.9496037  | -3.8098695 | 87.9565827 |
| C | 3.2777747  | -4.0281224 | 87.5025159 |
| H | 0.5493563  | -2.4438679 | 88.8545692 |
| H | 1.1985011  | -4.6079512 | 87.8536899 |
| H | 3.5574181  | -4.9988165 | 87.0654519 |
| H | 5.2325371  | -3.1444871 | 87.2046789 |
| C | -2.1701437 | 3.6072472  | 90.2903584 |
| C | -1.9515836 | 2.5069625  | 89.4119612 |
| C | -2.6177660 | 4.8220774  | 89.7454078 |

|   |            |           |            |
|---|------------|-----------|------------|
| C | -2.2413122 | 2.6360636 | 88.0280265 |
| C | -2.6579503 | 3.8845905 | 87.5295534 |
| C | -2.8145666 | 5.0029935 | 88.3629064 |
| H | -2.7742665 | 5.6872347 | 90.4098589 |
| C | -2.1344645 | 1.4457195 | 87.0766550 |
| H | -2.8268603 | 3.9867323 | 86.4485011 |
| C | -1.2539290 | 1.7248205 | 85.8485327 |
| H | -1.6964856 | 2.4984945 | 85.1883320 |
| H | -1.1327207 | 0.8010002 | 85.2454502 |
| H | -0.2525001 | 2.0885448 | 86.1467277 |
| C | -3.5423850 | 0.9703750 | 86.6671835 |
| H | -1.6652188 | 0.6099363 | 87.6360980 |
| H | -4.0803534 | 1.7608999 | 86.1027568 |
| H | -4.1569927 | 0.7133856 | 87.5541575 |
| H | -3.4815124 | 0.0727682 | 86.0169194 |
| C | -3.0832051 | 6.4064096 | 87.8301672 |
| C | -1.7837580 | 7.2385164 | 87.9155903 |
| H | -1.9614985 | 8.2848021 | 87.5891962 |
| H | -0.9977863 | 6.8007599 | 87.2662590 |
| H | -1.3799536 | 7.2608014 | 88.9477519 |
| C | -3.6533251 | 6.4424712 | 86.4072143 |
| H | -3.8301824 | 6.8729770 | 88.5132093 |
| H | -3.9143147 | 7.4820364 | 86.1230284 |
| H | -4.5672449 | 5.8214785 | 86.3101616 |
| H | -2.9079820 | 6.0785982 | 85.6697707 |
| C | -1.8878352 | 3.5044360 | 91.7888184 |
| C | -1.3182070 | 4.8036459 | 92.3868805 |
| H | -0.7284498 | 4.6090505 | 93.3060185 |
| H | -2.1060568 | 5.5339217 | 92.6654621 |
| H | -0.7198506 | 5.3565540 | 91.6270916 |
| C | -3.1397582 | 3.0837282 | 92.5823997 |
| H | -1.1177316 | 2.7169642 | 91.9185726 |
| H | -2.9111302 | 2.9872759 | 93.6642841 |
| H | -3.5422502 | 2.1145340 | 92.2311941 |
| H | -3.9444399 | 3.8397524 | 92.4666926 |
| H | 7.8263599  | 5.2819540 | 86.1619833 |
| H | 8.0336852  | 2.2630713 | 91.2637423 |
| H | 4.9902174  | 0.5531141 | 83.8712910 |
| C | 8.0042500  | 5.0617155 | 87.2377297 |
| H | 5.2323475  | 2.7788424 | 92.7165448 |
| H | 8.5009026  | 7.1543938 | 87.6478066 |
| H | 2.9860351  | 2.0423462 | 84.3995721 |
| C | 7.0119903  | 3.9707165 | 87.6257675 |
| C | 7.2452817  | 1.4812806 | 91.2660869 |
| C | 7.8018673  | 6.3732156 | 88.0118237 |
| H | 8.0006803  | 6.2377815 | 89.0958733 |
| C | 6.8469448  | 3.5483849 | 88.9586461 |
| C | 5.5717434  | 1.0869637 | 84.6507391 |
| H | 9.6115188  | 3.6307467 | 86.7779059 |
| C | 6.2748379  | 3.3047717 | 86.6336706 |
| C | 9.4514459  | 4.5510782 | 87.3748522 |
| H | 10.1782994 | 5.3167822 | 87.0320784 |
| H | 6.3804816  | 3.6390063 | 85.5887295 |
| C | 5.3719034  | 3.1521625 | 91.6815445 |
| H | 7.1507138  | 1.1038635 | 92.3053482 |
| H | 7.5984749  | 0.6463072 | 90.6273978 |
| C | 5.9960768  | 2.4807851 | 89.3049095 |
| C | 3.5481212  | 2.5218867 | 85.2268677 |
| C | 5.4155607  | 2.2283988 | 86.9206967 |
| H | 6.3402514  | 0.3898584 | 85.0436299 |
| H | 6.1018335  | 1.9243793 | 84.1510112 |
| C | 5.8998622  | 2.0368443 | 90.7634303 |
| C | 5.2894206  | 1.8029233 | 88.2748653 |
| C | 4.6396510  | 1.5829230 | 85.7699092 |
| H | 4.3902598  | 3.5284804 | 91.3343471 |
| H | 2.8173828  | 2.7728751 | 86.0199361 |
| H | 6.0746734  | 4.0098174 | 91.7367883 |
| H | 6.7675888  | 6.7538888 | 87.8965206 |
| H | 3.9726939  | 3.4712876 | 84.8386801 |
| H | 9.6872640  | 4.3097578 | 88.4328303 |
| H | 5.1690551  | 1.2042124 | 90.8092197 |

|    |           |            |            |
|----|-----------|------------|------------|
| H  | 4.1166551 | 0.6929774  | 86.1695198 |
| Zn | 1.3570842 | 5.1490385  | 91.6811384 |
| Br | 2.4513922 | 5.3877475  | 93.6839914 |
| H  | 7.4257086 | 4.0427131  | 89.7564836 |
| C  | 5.1499958 | 6.7740963  | 90.3812879 |
| C  | 3.7570485 | 6.7049195  | 90.3457660 |
| C  | 2.9880227 | 7.8883472  | 90.4460900 |
| C  | 3.6321558 | 9.1420191  | 90.5515354 |
| C  | 5.0298657 | 9.2043509  | 90.6114065 |
| C  | 5.7855958 | 8.0217296  | 90.5282442 |
| C  | 1.5297614 | 7.8444874  | 90.4045769 |
| H  | 3.0274746 | 10.0607247 | 90.5972835 |
| H  | 5.5346200 | 10.1765180 | 90.7142129 |
| O  | 0.8368721 | 6.8481369  | 90.6908604 |
| C  | 4.6938821 | 8.6970427  | 86.3947740 |
| C  | 3.9792823 | 7.5904540  | 86.7423168 |
| C  | 2.7360654 | 8.0964463  | 87.3756806 |
| O  | 2.7515095 | 9.4491952  | 87.4607353 |
| C  | 3.9603141 | 9.9259886  | 86.8319394 |
| O  | 1.7831931 | 7.4226396  | 87.7735087 |
| C  | 4.1460343 | 6.1314062  | 86.6019537 |
| H  | 4.5627313 | 5.6956992  | 87.5379220 |
| H  | 4.5292730 | 10.5297402 | 87.5744024 |
| H  | 3.6644872 | 10.6029537 | 86.0000405 |
| Zn | 2.3007081 | 5.3105761  | 86.6087493 |
| H  | 4.8358321 | 5.8591168  | 85.7812787 |
| Br | 0.4332850 | 5.0552105  | 85.2047113 |
| H  | 3.2673642 | 5.7407893  | 90.1344963 |
| H  | 5.7412898 | 5.8553902  | 90.2656449 |
| H  | 6.8846034 | 8.0723859  | 90.5551091 |
| H  | 5.6701296 | 8.7289293  | 85.8912314 |
| H  | 0.9969253 | 8.7846592  | 90.1301345 |

|   |            |            |            |
|---|------------|------------|------------|
| O | 2.2697164  | 3.8861364  | 88.0508401 |
| C | -0.8632449 | -2.5893633 | 92.8797054 |
| C | 0.5054505  | -2.7328995 | 92.5301238 |
| H | -2.6830729 | -1.4594994 | 92.5641836 |
| H | -1.3096717 | -3.2530284 | 93.6358146 |
| H | 2.1400952  | -2.0274997 | 91.3112096 |
| H | 1.1196925  | -3.4986778 | 93.0279020 |
| C | 1.9919506  | -3.8376508 | 88.0181408 |
| C | 3.3230444  | -4.0496147 | 87.5716698 |
| H | 0.5758356  | -2.4717202 | 88.8914537 |
| H | 1.2488203  | -4.6442038 | 87.9245556 |
| H | 3.6135854  | -5.0235969 | 87.1494171 |
| H | 5.2696238  | -3.1515161 | 87.2671903 |
| C | -2.1814875 | 3.5923712  | 90.2756575 |
| C | -1.9488637 | 2.5041541  | 89.3857485 |
| C | -2.6247540 | 4.8129897  | 89.7413835 |
| C | -2.2176274 | 2.6531970  | 87.9994097 |
| C | -2.6279723 | 3.9081170  | 87.5128296 |
| C | -2.8017267 | 5.0137201  | 88.3594718 |
| H | -2.7935394 | 5.6681844  | 90.4157879 |
| C | -2.1001074 | 1.4753869  | 87.0339808 |
| H | -2.7788711 | 4.0262441  | 86.4310122 |
| C | -1.2273692 | 1.7755813  | 85.8055608 |
| H | -1.6800187 | 2.5478551  | 85.1509296 |
| H | -1.0957386 | 0.8581818  | 85.1952058 |
| H | -0.2294081 | 2.1493795  | 86.1021988 |
| C | -3.5053182 | 0.9912564  | 86.6253549 |
| H | -1.6213439 | 0.6377896  | 87.5826782 |
| H | -4.0533705 | 1.7837921  | 86.0739722 |
| H | -4.1135908 | 0.7181374  | 87.5116910 |
| H | -3.4394252 | 0.1026465  | 85.9634169 |
| C | -3.0719405 | 6.4234224  | 87.8443947 |
| C | -1.7844271 | 7.2686904  | 87.9716731 |
| H | -1.9690255 | 8.3192326  | 87.6636885 |
| H | -0.9825388 | 6.8557822  | 87.3257647 |
| H | -1.4003840 | 7.2747590  | 89.0117961 |
| C | -3.6104573 | 6.4777569  | 86.4098963 |
| H | -3.8393305 | 6.8695575  | 88.5187841 |
| H | -3.8759381 | 7.5191899  | 86.1372224 |
| H | -4.5158020 | 5.8499083  | 86.2826467 |
| H | -2.8443442 | 6.1350696  | 85.6839046 |
| C | -1.9132511 | 3.4764127  | 91.7760660 |
| C | -1.3288350 | 4.7645064  | 92.3846634 |
| H | -0.7489406 | 4.5591687  | 93.3078689 |
| H | -2.1089412 | 5.5050813  | 92.6583437 |
| H | -0.7135902 | 5.3081979  | 91.6326519 |
| C | -3.1770086 | 3.0698493  | 92.5576911 |
| H | -1.1554887 | 2.6773667  | 91.9086261 |
| H | -2.9604891 | 2.9642539  | 93.6413159 |
| H | -3.5912394 | 2.1088952  | 92.1977694 |
| H | -3.9704049 | 3.8370049  | 92.4381317 |
| H | 7.7918516  | 5.2764286  | 86.1187174 |
| H | 8.0456538  | 2.2944999  | 91.2454611 |
| H | 4.9680540  | 0.3995857  | 83.9675295 |
| C | 7.9793346  | 5.0622534  | 87.1941933 |
| H | 5.2364696  | 2.7879993  | 92.7047997 |
| H | 8.4774090  | 7.1590818  | 87.5858910 |
| H | 3.0576944  | 2.0466349  | 84.2900610 |
| C | 6.9894756  | 3.9744960  | 87.5973881 |
| C | 7.2641751  | 1.5058171  | 91.2518753 |
| C | 7.7828731  | 6.3790042  | 87.9609764 |
| H | 7.9938664  | 6.2498704  | 89.0436168 |
| C | 6.8423027  | 3.5546260  | 88.9331691 |
| C | 5.5459018  | 0.9291310  | 84.7526132 |
| H | 9.5815585  | 3.6283308  | 86.7298539 |
| C | 6.2362134  | 3.3100118  | 86.6170033 |
| C | 9.4275289  | 4.5528150  | 87.3214445 |
| H | 10.1524730 | 5.3153638  | 86.9677968 |
| H | 6.3285461  | 3.6407756  | 85.5695294 |
| C | 5.3744226  | 3.1584690  | 91.6688043 |
| H | 7.1774761  | 1.1303422  | 92.2924182 |

## 14p-ma

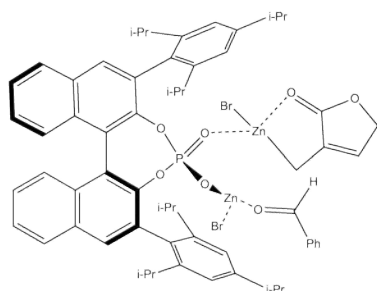

Energy (Hartree) = -11970.000108

|   |            |            |            |
|---|------------|------------|------------|
| C | 0.0909991  | 1.0437966  | 89.4690436 |
| C | 0.8677585  | -0.0367583 | 89.8983251 |
| C | 0.3129863  | -0.9011905 | 90.9132198 |
| C | 1.0782651  | -1.9110502 | 91.5693657 |
| C | -1.0635228 | -0.7221815 | 91.3075121 |
| C | -1.6275483 | -1.5987988 | 92.2820163 |
| C | -1.8243336 | 0.3448808  | 90.7476199 |
| H | -2.8776363 | 0.4556683  | 91.0449181 |
| C | -1.2623873 | 1.2707579  | 89.8781682 |
| C | 4.4182684  | 0.6221781  | 88.5757111 |
| C | 4.7839507  | -0.6468626 | 88.1422154 |
| H | 5.7766628  | -0.7892873 | 87.6872820 |
| C | 3.8799362  | -1.7444473 | 88.1802373 |
| C | 4.2435353  | -3.0161182 | 87.6438626 |
| C | 2.5466535  | -1.5459599 | 88.6959965 |
| C | 1.6134917  | -2.6190261 | 88.5639369 |
| C | 2.2053626  | -0.2712154 | 89.2870095 |
| C | 3.1412869  | 0.7682609  | 89.1991321 |
| O | 0.6361787  | 1.9511764  | 88.5590779 |
| O | 2.8657018  | 1.9993530  | 89.7787188 |
| P | 1.7229981  | 3.0198997  | 89.1644888 |
| O | 1.1256492  | 3.7053361  | 90.4095283 |

|    |           |            |            |
|----|-----------|------------|------------|
| H  | 7.6240037 | 0.6732284  | 90.6141339 |
| C  | 5.9960853 | 2.4879624  | 89.2925219 |
| C  | 3.6144823 | 2.5495534  | 85.1066148 |
| C  | 5.3780831 | 2.2369150  | 86.9182483 |
| H  | 6.2237652 | 0.1947438  | 85.2338496 |
| H  | 6.1803800 | 1.6860311  | 84.2457793 |
| C  | 5.9120363 | 2.0467898  | 90.7524405 |
| C  | 5.2759851 | 1.8099677  | 88.2728237 |
| C  | 4.5984613 | 1.5768869  | 85.7785668 |
| H  | 4.3890778 | 3.5243011  | 91.3214035 |
| H  | 2.8660454 | 2.9117935  | 85.8372112 |
| H  | 6.0689024 | 4.0229890  | 91.7230604 |
| H  | 6.7466564 | 6.7571872  | 87.8546792 |
| H  | 4.1249208 | 3.4321418  | 84.6684714 |
| H  | 9.6729059 | 4.3169582  | 88.3783326 |
| H  | 5.1893814 | 1.2070904  | 90.8020837 |
| H  | 3.9863595 | 0.7629291  | 86.2133049 |
| Zn | 1.3762886 | 5.0706800  | 91.6938582 |
| Br | 2.4552248 | 5.2435021  | 93.7008725 |
| H  | 7.4331341 | 4.0486991  | 89.7224878 |
| C  | 5.1810592 | 6.7728388  | 90.3878274 |
| C  | 3.7878615 | 6.6976224  | 90.3920975 |
| C  | 3.0167437 | 7.8762136  | 90.5175361 |
| C  | 3.6586983 | 9.1310129  | 90.6136647 |
| C  | 5.0569514 | 9.2002046  | 90.6355997 |
| C  | 5.8150885 | 8.0220180  | 90.5229380 |
| C  | 1.5558297 | 7.8284805  | 90.5014937 |
| H  | 3.0511085 | 10.0469246 | 90.6770785 |
| H  | 5.5598622 | 10.1742642 | 90.7306160 |
| O  | 0.8678966 | 6.8313295  | 90.7847533 |
| C  | 4.6132354 | 8.7202704  | 86.3688370 |
| C  | 3.9298978 | 7.6065744  | 86.7555949 |
| C  | 2.7166950 | 8.1011840  | 87.4561821 |
| O  | 2.7296402 | 9.4562529  | 87.5467035 |
| C  | 3.8931861 | 9.9424241  | 86.8493694 |
| O  | 1.7921122 | 7.4214365  | 87.9002985 |
| C  | 4.1002015 | 6.1530446  | 86.6048808 |
| H  | 4.4893652 | 5.7051179  | 87.5467680 |
| H  | 4.4991060 | 10.5524967 | 87.5577486 |
| H  | 3.5416330 | 10.6179771 | 86.0372886 |
| Zn | 2.2566575 | 5.3241025  | 86.5724609 |
| H  | 4.8009038 | 5.8841965  | 85.7929283 |
| Br | 0.3745197 | 5.1547630  | 85.2039132 |
| H  | 3.2970733 | 5.7315498  | 90.1957798 |
| H  | 5.7713150 | 5.8565787  | 90.2499115 |
| H  | 6.9142285 | 8.0769782  | 90.5163459 |
| H  | 5.5599194 | 8.7586957  | 85.8124383 |
| H  | 1.0205322 | 8.7750825  | 90.2503624 |

|    |            |            |            |
|----|------------|------------|------------|
| H  | 7.6222075  | 5.7166226  | 95.7104314 |
| H  | 4.0947474  | 3.1923727  | 95.7886917 |
| H  | 6.8993402  | 6.6733157  | 93.5097771 |
| H  | 6.2248328  | 3.9832943  | 96.8601472 |
| H  | 4.7898520  | 5.8886108  | 92.4382834 |
| Br | 0.1119305  | 1.9039439  | 93.0680181 |
| Zn | 0.1763750  | 4.0821528  | 92.2219049 |
| H  | 3.2878827  | 8.4448541  | 92.9880530 |
| H  | -0.9706608 | 6.3838029  | 91.8452370 |
| C  | 1.1775470  | 7.9670229  | 92.7084348 |
| C  | 2.3330009  | 8.3860270  | 93.5573972 |
| H  | 0.8303256  | 8.5457104  | 91.8432726 |
| C  | 0.6628716  | 6.7947033  | 93.1744277 |
| C  | -0.4353241 | 5.9317242  | 92.7024750 |
| C  | 1.4982271  | 6.4101307  | 94.3494877 |
| O  | 2.4613933  | 7.3636949  | 94.5582168 |
| O  | 1.4409444  | 5.4000307  | 95.0363585 |
| H  | 2.1771379  | 9.3658924  | 94.0623640 |
| H  | -1.1565748 | 5.7443168  | 93.5274336 |
| C  | 0.1554298  | 2.7325573  | 87.1482703 |
| C  | 0.3126288  | 1.3688344  | 86.9013020 |
| C  | -0.8073448 | 0.6570411  | 86.3321860 |
| C  | -0.8297413 | -0.7613605 | 86.1763251 |
| C  | -1.9737347 | 1.4080031  | 85.9271552 |
| C  | -3.0668431 | 0.7205685  | 85.3182974 |
| C  | -2.0497263 | 2.8050295  | 86.2021964 |
| H  | -2.9663344 | 3.3507539  | 85.9287605 |
| C  | -1.0308820 | 3.4771116  | 86.8681342 |
| C  | 3.1608147  | 0.0375097  | 89.1078188 |
| C  | 3.8248190  | -0.7979042 | 88.2176508 |
| H  | 4.6427257  | -1.4343117 | 88.5884464 |
| C  | 3.4737806  | -0.8621199 | 86.8387979 |
| C  | 4.2203808  | -1.6615246 | 85.9217626 |
| C  | 2.3420844  | -0.1074030 | 86.3570337 |
| C  | 2.0462065  | -0.1477116 | 84.9610147 |
| C  | 1.5808573  | 0.6890922  | 87.2893042 |
| C  | 2.0697328  | 0.8057709  | 88.5968540 |
| O  | 1.2353531  | 3.4431355  | 87.6663812 |
| O  | 1.4363982  | 1.6834396  | 89.4963699 |
| P  | 1.6928027  | 3.2746688  | 89.2190958 |
| O  | 0.8663161  | 4.1344778  | 90.2079456 |
| O  | 3.1723398  | 3.7212150  | 89.2718053 |
| C  | -3.0398694 | -0.6555912 | 85.1482465 |
| C  | -1.9182115 | -1.4014046 | 85.5988223 |
| H  | -3.9445972 | 1.3063273  | 85.0029527 |
| H  | -3.8928856 | -1.1731115 | 84.6835453 |
| H  | 0.0262198  | -1.3535487 | 86.5279678 |
| H  | -1.9127258 | -2.4971915 | 85.4952812 |
| C  | 2.8039467  | -0.9203408 | 84.0917050 |
| C  | 3.8919984  | -1.6957715 | 84.5748435 |
| H  | 1.2136673  | 0.4552521  | 84.5724129 |
| H  | 2.5621184  | -0.9272280 | 83.0179403 |
| H  | 4.4800325  | -2.3109861 | 83.8768767 |
| H  | 5.0735526  | -2.2427431 | 86.3054113 |
| C  | -2.0484955 | 5.0817988  | 88.5195176 |
| C  | -1.1579687 | 4.8585199  | 87.4262453 |
| C  | -2.0281557 | 6.3374275  | 89.1518079 |
| C  | -0.3064343 | 5.9048966  | 86.9790035 |
| C  | -0.3346876 | 7.1430197  | 87.6461130 |
| C  | -1.1742366 | 7.3787159  | 88.7464019 |
| H  | -2.6960113 | 6.5100273  | 90.0118479 |
| C  | 0.6064505  | 5.7428930  | 85.7652065 |
| H  | 0.3326974  | 7.9429103  | 87.2943919 |
| C  | 2.0626901  | 6.1470147  | 86.0544955 |
| H  | 2.1553327  | 7.2302297  | 86.2770174 |
| H  | 2.7035714  | 5.9366395  | 85.1737290 |
| H  | 2.4736456  | 5.5880002  | 86.9175540 |
| C  | 0.0361902  | 6.5181027  | 84.5612289 |
| H  | 0.6098235  | 4.6699758  | 85.4838195 |
| H  | 0.0000882  | 7.6082440  | 84.7687707 |
| H  | -0.9950136 | 6.1876078  | 84.3218496 |

### 14q-ma; COSMO

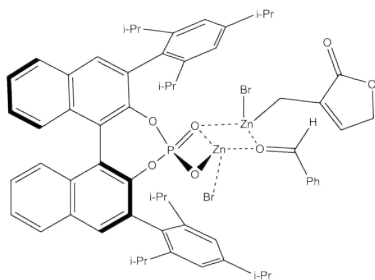

Energy (Hartree) = -11970.01994938

|   |           |           |            |
|---|-----------|-----------|------------|
| C | 6.6921273 | 5.3624621 | 95.2397061 |
| C | 3.0941727 | 3.9642390 | 93.4635294 |
| C | 6.2900439 | 5.9000847 | 94.0005681 |
| C | 4.7298754 | 3.9387738 | 95.2880895 |
| C | 4.3307389 | 4.4583108 | 94.0318636 |
| C | 5.9112825 | 4.3869524 | 95.8862526 |
| C | 5.1127945 | 5.4549224 | 93.3972180 |
| O | 2.6014993 | 4.3116836 | 92.3588039 |

|    |            |            |            |
|----|------------|------------|------------|
| H  | 0.6654572  | 6.3655703  | 83.6597907 |
| C  | -1.2140000 | 8.7162686  | 89.4777528 |
| C  | 0.0746427  | 9.5380796  | 89.3392146 |
| H  | 0.0483407  | 10.4166813 | 90.0155839 |
| H  | 0.2012625  | 9.9284372  | 88.3078588 |
| H  | 0.9761866  | 8.9380618  | 89.5801425 |
| C  | -2.4424799 | 9.5374353  | 89.0376576 |
| H  | -1.3489715 | 8.4771322  | 90.5577022 |
| H  | -2.5161393 | 10.4835624 | 89.6131297 |
| H  | -3.3836823 | 8.9706365  | 89.1849773 |
| H  | -2.3706826 | 9.7957864  | 87.9602071 |
| C  | -2.9758920 | 3.9973573  | 89.0752436 |
| C  | -2.4384633 | 3.4047562  | 90.3902286 |
| H  | -3.1114349 | 2.6124010  | 90.7767244 |
| H  | -2.3585280 | 4.1845166  | 91.1781964 |
| H  | -1.4384758 | 2.9499569  | 90.2514377 |
| C  | -4.4233049 | 4.4930387  | 89.2348682 |
| H  | -5.0855177 | 3.6567420  | 89.5393406 |
| H  | -4.8136524 | 4.9142469  | 88.2860393 |
| H  | -4.5112697 | 5.2793313  | 90.0132413 |
| H  | 4.8183774  | 0.9897248  | 95.0768583 |
| H  | 1.6280025  | -3.2381406 | 92.4721798 |
| H  | 7.3195173  | 1.4249524  | 89.1596136 |
| C  | 4.1202906  | 0.1444606  | 94.8847242 |
| H  | -0.5563321 | -1.8824404 | 90.6529425 |
| H  | 3.0695991  | 0.5374938  | 96.7686540 |
| H  | 6.3465121  | 3.6588322  | 90.0455563 |
| C  | 3.8747331  | 0.1177850  | 93.3812466 |
| C  | 1.8039882  | -3.1620289 | 91.3789279 |
| C  | 2.8363927  | 0.3986656  | 95.6927384 |
| H  | 2.1330947  | -0.4561203 | 95.6153253 |
| C  | 2.8985373  | -0.7187169 | 92.8146300 |
| C  | 6.6529730  | 0.8557669  | 89.8405688 |
| H  | 5.7780833  | -1.3011020 | 94.8049647 |
| C  | 4.6581224  | 0.9006215  | 92.5143351 |
| C  | 4.8258886  | -1.1432635 | 95.3506464 |
| H  | 5.0512367  | -1.1031740 | 96.4368354 |
| H  | 5.4451602  | 1.5370763  | 92.9496290 |
| C  | 0.1886156  | -1.2136275 | 91.1326847 |
| H  | 1.0833922  | -3.8447489 | 90.8831386 |
| H  | 2.8283173  | -3.5357575 | 91.1752125 |
| C  | 2.6777697  | -0.7743107 | 91.4274566 |
| C  | 5.8384211  | 3.0376526  | 90.8099740 |
| C  | 4.4773546  | 0.8863518  | 91.1173037 |
| H  | 6.3762847  | -0.0891120 | 89.3333986 |
| H  | 7.2347151  | 0.5914755  | 90.7486370 |
| C  | 1.6165555  | -1.7226559 | 90.8674964 |
| C  | 3.4601759  | 0.0554455  | 90.5766996 |
| C  | 5.4106197  | 1.6892579  | 90.2128106 |
| H  | 0.0452279  | -0.1861575 | 90.7464084 |
| H  | 4.9618344  | 3.6053007  | 91.1750229 |
| H  | -0.0286553 | -1.1789325 | 92.2201795 |
| H  | 2.2877734  | 1.2916445  | 95.3304274 |
| H  | 6.5382501  | 2.9225366  | 91.6635339 |
| H  | 4.1840693  | -2.0312028 | 95.1708009 |
| H  | 1.7512283  | -1.7562802 | 89.7669856 |
| H  | 4.8539372  | 1.9116010  | 89.2800609 |
| Zn | 2.8934988  | 5.2301072  | 90.5721320 |
| Br | 3.6755013  | 7.3487025  | 90.1612916 |
| H  | 2.2811188  | -1.3482328 | 93.4738296 |
| H  | 2.5145760  | 3.2091069  | 94.0395214 |
| H  | -3.0020211 | 3.1650030  | 88.3462894 |

Energy (Hartree) = -11970.0078796599

|    |            |            |            |
|----|------------|------------|------------|
| C  | 6.6850221  | 5.3686984  | 95.2541287 |
| C  | 3.0963678  | 3.9620456  | 93.4590043 |
| C  | 6.2921673  | 5.8973685  | 94.0093523 |
| C  | 4.7205730  | 3.9478607  | 95.2972235 |
| C  | 4.3320823  | 4.4582752  | 94.0352917 |
| C  | 5.8979511  | 4.3989644  | 95.9010143 |
| C  | 5.1183479  | 5.4495146  | 93.4001943 |
| O  | 2.6170796  | 4.3076693  | 92.3494481 |
| H  | 7.6117727  | 5.7253778  | 95.7297617 |
| H  | 4.0777224  | 3.2075979  | 95.7968467 |
| H  | 6.9044495  | 6.6673327  | 93.5169310 |
| H  | 6.2031839  | 4.0028623  | 96.8807829 |
| H  | 4.8013432  | 5.8778088  | 92.4368348 |
| Br | 0.1357738  | 1.8861458  | 93.0509613 |
| Zn | 0.1857599  | 4.0680143  | 92.2328039 |
| H  | 3.2615097  | 8.4728025  | 92.9415648 |
| H  | -0.9918068 | 6.3642857  | 91.8870953 |
| C  | 1.1521249  | 7.9714531  | 92.7115715 |
| C  | 2.3228353  | 8.3990481  | 93.5361280 |
| H  | 0.7790371  | 8.5488495  | 91.8564683 |
| C  | 0.6652386  | 6.7890340  | 93.1810402 |
| C  | -0.4304285 | 5.9135135  | 92.7282773 |
| C  | 1.5351941  | 6.4070163  | 94.3332898 |
| O  | 2.4899359  | 7.3743036  | 94.5256818 |
| O  | 1.5117609  | 5.3891612  | 95.0084266 |
| H  | 2.1674562  | 9.3742926  | 94.0515352 |
| H  | -1.1286725 | 5.7118384  | 93.5694634 |
| C  | 0.1583005  | 2.7333770  | 87.1477470 |
| C  | 0.3124653  | 1.3693870  | 86.8993496 |
| C  | -0.8082474 | 0.6605679  | 86.3279741 |
| C  | -0.8332995 | -0.7573742 | 86.1703381 |
| C  | -1.9725554 | 1.4138876  | 85.9219995 |
| C  | -3.0650762 | 0.7287976  | 85.3106087 |
| C  | -2.0458569 | 2.8103064  | 86.1993051 |
| H  | -2.9611244 | 3.3591436  | 85.9273962 |
| C  | -1.0270318 | 3.4797328  | 86.8673545 |
| C  | 3.1571518  | 0.0332704  | 89.1070292 |
| C  | 3.8178448  | -0.8050320 | 88.2174409 |
| H  | 4.6336523  | -1.4429784 | 88.5903222 |
| C  | 3.4669446  | -0.8702527 | 86.8389622 |
| C  | 4.2100538  | -1.6726039 | 85.9224047 |
| C  | 2.3378192  | -0.1123698 | 86.3569363 |
| C  | 2.0420090  | -0.1531648 | 84.9611320 |
| C  | 1.5786966  | 0.6868317  | 87.2884530 |
| O  | 2.0675440  | 0.8041424  | 88.5961710 |
| O  | 1.2374547  | 3.4415522  | 87.6666418 |
| O  | 1.4362693  | 1.6818867  | 89.4948677 |
| P  | 1.6931847  | 3.2746372  | 89.2210095 |
| O  | 0.8634654  | 4.1350090  | 90.2062113 |
| O  | 3.1728524  | 3.7183101  | 89.2760620 |
| C  | -3.0404733 | -0.6466053 | 85.1384034 |
| C  | -1.9213255 | -1.3945111 | 85.5898420 |
| H  | -3.9413436 | 1.3165177  | 84.9947169 |
| H  | -3.8936444 | -1.1617440 | 84.6714749 |
| H  | 0.0214263  | -1.3504382 | 86.5231694 |
| H  | -1.9173783 | -2.4901293 | 85.4849656 |
| C  | 2.7963935  | -0.9293143 | 84.0927383 |
| C  | 3.8815508  | -1.7076096 | 84.5760801 |
| H  | 1.2110781  | 0.4523240  | 84.5733300 |
| H  | 2.5540283  | -0.9364397 | 83.0191416 |
| H  | 4.4675354  | -2.3255230 | 83.8788453 |
| H  | 5.0616726  | -2.2557516 | 86.3065925 |
| C  | -2.0433548 | 5.0800483  | 88.5224694 |
| C  | -1.1533185 | 4.8596548  | 87.4286440 |
| C  | -2.0234195 | 6.3344038  | 89.1566538 |
| C  | -0.3010200 | 5.9062966  | 86.9842432 |
| C  | -0.3298964 | 7.1429140  | 87.6534438 |
| C  | -1.1708507 | 7.3768123  | 88.7526683 |
| H  | -2.6912250 | 6.5048935  | 90.0172683 |

14q-ma

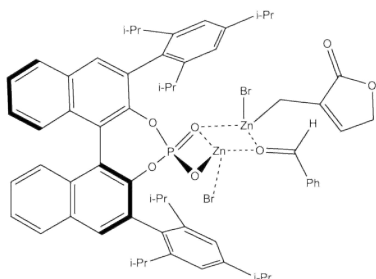

|    |            |            |            |
|----|------------|------------|------------|
| C  | 0.6128699  | 5.7464362  | 85.7709419 |
| H  | 0.3384295  | 7.9430260  | 87.3041705 |
| C  | 2.0697136  | 6.1461533  | 86.0625987 |
| H  | 2.1651346  | 7.2272135  | 86.2939198 |
| H  | 2.7099740  | 5.9422484  | 85.1799373 |
| H  | 2.4816688  | 5.5792763  | 86.9197634 |
| C  | 0.0441894  | 6.5260906  | 84.5692335 |
| H  | 0.6141747  | 4.6742665  | 85.4865586 |
| H  | 0.0093126  | 7.6156072  | 84.7796141 |
| H  | -0.9876572 | 6.1988426  | 84.3289253 |
| H  | 0.6730030  | 6.3758916  | 83.6671327 |
| C  | -1.2146988 | 8.7145469  | 89.4833841 |
| C  | 0.0719486  | 9.5396816  | 89.3461795 |
| H  | 0.0420105  | 10.4200949 | 90.0201935 |
| H  | 0.1985102  | 9.9296657  | 88.3147471 |
| H  | 0.9755993  | 8.9437543  | 89.5888538 |
| C  | -2.4446630 | 9.5319985  | 89.0409252 |
| H  | -1.3500400 | 8.4752459  | 90.5634263 |
| H  | -2.5232105 | 10.4785496 | 89.6150724 |
| H  | -3.3844177 | 8.9623848  | 89.1854242 |
| H  | -2.3720444 | 9.7893221  | 87.9634701 |
| C  | -2.9707013 | 3.9946625  | 89.0763088 |
| C  | -2.4445797 | 3.4122571  | 90.4001978 |
| H  | -3.1182994 | 2.6204863  | 90.7862677 |
| H  | -2.3724604 | 4.1963695  | 91.1843329 |
| H  | -1.4427699 | 2.9581814  | 90.2736702 |
| C  | -4.4215285 | 4.4862025  | 89.2168617 |
| H  | -5.0848948 | 3.6508191  | 89.5212349 |
| H  | -4.8035542 | 4.8998737  | 88.2614414 |
| H  | -4.5206797 | 5.2783768  | 89.9878472 |
| H  | 4.8093651  | 1.0069597  | 95.0714566 |
| H  | 1.6143712  | -3.2335258 | 92.4873800 |
| H  | 7.3115344  | 1.4207875  | 89.1468852 |
| C  | 4.1177099  | 0.1554341  | 94.8821831 |
| H  | -0.5493482 | -1.8931722 | 90.6393046 |
| H  | 3.0627068  | 0.5477291  | 96.7647570 |
| H  | 6.3438168  | 3.6561145  | 90.0345432 |
| C  | 3.8735904  | 0.1226730  | 93.3785779 |
| C  | 1.8042872  | -3.1662772 | 91.3959757 |
| C  | 2.8317213  | 0.4029768  | 95.6889847 |
| H  | 2.1358015  | -0.4581112 | 95.6167124 |
| C  | 2.9009456  | -0.7187239 | 92.8142136 |
| C  | 6.6444640  | 0.8522746  | 89.8278394 |
| H  | 5.7865563  | -1.2775093 | 94.8064768 |
| C  | 4.6549645  | 0.9049921  | 92.5098667 |
| C  | 4.8334382  | -1.1251907 | 95.3517627 |
| H  | 5.0577899  | -1.0823501 | 96.4380961 |
| H  | 5.4400950  | 1.5448932  | 92.9436033 |
| C  | 0.1921975  | -1.2198896 | 91.1178943 |
| H  | 1.0899555  | -3.8541270 | 90.8983962 |
| H  | 2.8310873  | -3.5416751 | 91.2092872 |
| C  | 2.6801069  | -0.7788778 | 91.4275455 |
| C  | 5.8399998  | 3.0352078  | 90.8019229 |
| C  | 4.4742819  | 0.8868522  | 91.1131805 |
| H  | 6.3634969  | -0.0897012 | 89.3180465 |
| H  | 7.2274225  | 0.5820601  | 90.7332736 |
| C  | 1.6220879  | -1.7318586 | 90.8694067 |
| C  | 3.4588629  | 0.0523595  | 90.5752628 |
| C  | 5.4058766  | 1.6885086  | 90.2057431 |
| H  | 0.0507694  | -0.1965722 | 90.7205935 |
| H  | 4.9670186  | 3.6043846  | 91.1723630 |
| H  | -0.0348126 | -1.1729575 | 92.2027368 |
| H  | 2.2730113  | 1.2877667  | 95.3223208 |
| H  | 6.5457005  | 2.9181227  | 91.6505460 |
| H  | 4.1992993  | -2.0186168 | 95.1728415 |
| H  | 1.7661692  | -1.7765058 | 89.7703699 |
| H  | 4.8463800  | 1.9147192  | 89.2756527 |
| Zn | 2.8945557  | 5.2357958  | 90.5622305 |
| Br | 3.6817364  | 7.3552552  | 90.1765641 |
| H  | 2.2849434  | -1.3478212 | 93.4749274 |
| H  | 2.5144871  | 3.2042056  | 94.0291561 |

H -2.9859966 3.1576369 88.3523220

### 14q-mi; COSMO

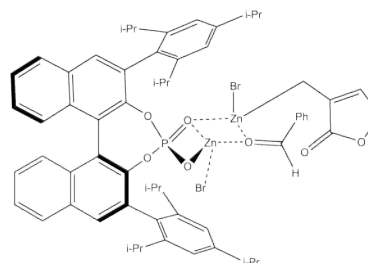

Energy (Hartree) = -11970.01993649

|   |             |            |             |
|---|-------------|------------|-------------|
| C | -6.2791543  | -3.5533785 | 168.2209284 |
| C | -5.6629599  | -4.7853947 | 168.4777020 |
| C | -6.3400519  | -5.6943565 | 169.3715283 |
| C | -5.7250999  | -6.8857162 | 169.8613793 |
| C | -7.6720962  | -5.3739294 | 169.8252828 |
| C | -8.3444499  | -6.2756720 | 170.7038161 |
| C | -8.2958770  | -4.1736185 | 169.3782927 |
| H | -9.3441587  | -3.9821111 | 169.6544126 |
| C | -7.6234493  | -3.2452598 | 168.5926578 |
| C | -2.0519849  | -4.4459382 | 167.1948402 |
| C | -1.8708630  | -5.6675469 | 166.5559053 |
| H | -0.9068245  | -5.8858234 | 166.0707064 |
| C | -2.9263846  | -6.6196961 | 166.4411800 |
| C | -2.7454975  | -7.8259401 | 165.6991990 |
| C | -4.2235271  | -6.3300418 | 167.0090097 |
| C | -5.2982050  | -7.2259593 | 166.7285505 |
| C | -4.3774237  | -5.1374811 | 167.8096746 |
| C | -3.2967398  | -4.2590304 | 167.8722910 |
| O | -5.5893299  | -2.5641398 | 167.4934332 |
| O | -3.4094526  | -3.1322206 | 168.6809730 |
| P | -4.3252898  | -1.8606626 | 168.2496011 |
| O | -4.6287702  | -1.1082458 | 169.5623360 |
| O | -3.6007832  | -0.8927737 | 167.2741467 |
| C | -7.7247173  | -7.4346907 | 171.1466405 |
| C | -6.3995086  | -7.7326841 | 170.7301451 |
| H | -9.3650344  | -6.0250639 | 171.0330890 |
| H | -8.2517296  | -8.1180650 | 171.8297843 |
| H | -4.6963148  | -7.1218622 | 169.5549612 |
| H | -5.9000967  | -8.6396715 | 171.1035954 |
| C | -5.0935679  | -8.3791858 | 165.9824974 |
| C | -3.8036849  | -8.6951900 | 165.4791503 |
| H | -6.3038684  | -6.9925438 | 167.1038471 |
| H | -5.9408817  | -9.0507366 | 165.7761437 |
| H | -3.6512951  | -9.6175977 | 164.8983409 |
| H | -1.7484040  | -8.0416664 | 165.2841076 |
| C | -8.3126170  | -0.7933647 | 168.6834887 |
| C | -8.2958669  | -2.0407843 | 168.0048028 |
| C | -8.8875960  | 0.3143379  | 168.0346794 |
| C | -8.8856959  | -2.1696051 | 166.7172645 |
| C | -9.4554886  | -1.0309398 | 166.1191102 |
| C | -9.4509963  | 0.2237752  | 166.7496491 |
| H | -8.8909145  | 1.2930396  | 168.5401210 |
| C | -8.8741225  | -3.4981613 | 165.9590963 |
| H | -9.8936602  | -1.1272873 | 165.1146347 |
| C | -7.7617323  | -3.5283684 | 164.8930709 |
| H | -7.9455040  | -2.7674762 | 164.1066185 |
| H | -7.7131345  | -4.5259566 | 164.4081785 |
| H | -6.7705090  | -3.2994842 | 165.3298933 |
| C | -10.2416980 | -3.8434239 | 165.3461009 |

|    |             |            |             |
|----|-------------|------------|-------------|
| H  | -8.6433877  | -4.2966578 | 166.6940538 |
| H  | -10.5229060 | -3.1390848 | 164.5357352 |
| H  | -11.0469118 | -3.8202206 | 166.1084613 |
| H  | -10.2186566 | -4.8591143 | 164.9001220 |
| C  | -10.0679867 | 1.4570787  | 166.0995687 |
| C  | -9.7977165  | 1.5505143  | 164.5898765 |
| H  | -10.1420302 | 2.5279230  | 164.1925245 |
| H  | -10.3423701 | 0.7643941  | 164.0264981 |
| H  | -8.7182741  | 1.4330819  | 164.3641796 |
| C  | -11.5776928 | 1.5310569  | 166.4006935 |
| H  | -9.5884176  | 2.3388187  | 166.5809452 |
| H  | -12.0258114 | 2.4545824  | 165.9776593 |
| H  | -11.7722836 | 1.5210643  | 167.4921945 |
| H  | -12.1068003 | 0.6611012  | 165.9575266 |
| C  | -7.7698955  | -0.6635080 | 170.1045913 |
| C  | -7.1241659  | 0.6996677  | 170.3941633 |
| H  | -6.5801608  | 0.6707825  | 171.3599648 |
| H  | -7.8761573  | 1.5132956  | 170.4638439 |
| H  | -6.4030078  | 0.9716444  | 169.6004588 |
| C  | -8.8748399  | -0.9695291 | 171.1349259 |
| H  | -6.9747805  | -1.4274857 | 170.2249024 |
| H  | -8.4778567  | -0.9064286 | 172.1695671 |
| H  | -9.2962251  | -1.9844225 | 170.9936384 |
| H  | -9.7096364  | -0.2432382 | 171.0420911 |
| H  | 0.9846639   | 0.8047679  | 165.6803289 |
| H  | 1.6366083   | -3.2747012 | 169.9396057 |
| C  | 1.1225355   | 0.4521551  | 166.7267453 |
| H  | -1.0258082  | -3.0726699 | 171.6810380 |
| H  | 1.1958004   | 2.4896044  | 167.5201041 |
| H  | -3.5976187  | -3.2033695 | 163.5368563 |
| C  | 0.3340633   | -0.8453053 | 166.8588541 |
| C  | 0.8467971   | -4.0511872 | 169.8633338 |
| C  | 0.6098359   | 1.5582414  | 167.6639403 |
| H  | 0.7016482   | 1.2676612  | 168.7302242 |
| C  | 0.1988096   | -1.5008007 | 168.0943453 |
| C  | -0.8523120  | -2.9084948 | 163.2453823 |
| H  | 3.0091984   | -0.5744086 | 166.2361987 |
| C  | -0.2422714  | -1.4519096 | 165.7296914 |
| C  | 2.6281886   | 0.1980859  | 166.9346807 |
| H  | 3.2117687   | 1.1283357  | 166.7742271 |
| H  | -0.1260307  | -0.9505794 | 164.7571989 |
| C  | -0.9687848  | -2.4985700 | 170.7335123 |
| H  | 0.8311832   | -4.6146901 | 170.8194192 |
| H  | 1.1409880   | -4.7510612 | 169.0548636 |
| C  | -0.5063301  | -2.7106146 | 168.2246390 |
| C  | -3.0912992  | -2.7226071 | 164.3985889 |
| C  | -0.9713918  | -2.6528640 | 165.8006302 |
| C  | -0.5286837  | -3.4148770 | 169.5799167 |
| C  | -1.1195647  | -3.2813669 | 167.0750629 |
| C  | -1.6355686  | -3.2043024 | 164.5334051 |
| H  | -1.9663597  | -2.0574444 | 170.5441694 |
| H  | -3.6952841  | -2.9336456 | 165.3018715 |
| H  | -0.2584753  | -1.6623073 | 170.8963311 |
| H  | -0.4555360  | 1.8053131  | 167.4838643 |
| H  | -3.1182336  | -1.6263891 | 164.2097224 |
| H  | 2.8318328   | -0.1526715 | 167.9683435 |
| H  | -1.2605658  | -4.2462970 | 169.5175175 |
| H  | -1.6791780  | -4.3062933 | 164.6317859 |
| H  | 0.6631757   | -1.0590257 | 168.9897143 |
| Zn | -3.5388008  | 0.5358531  | 169.1323216 |
| Br | -1.9997913  | 1.5333988  | 170.5014601 |
| C  | -7.1167549  | 5.5589159  | 165.7756068 |
| C  | -4.6845507  | 2.9895585  | 168.1267027 |
| C  | -7.1886594  | 4.1649769  | 165.5769668 |
| C  | -5.4663832  | 5.2525382  | 167.5263070 |
| C  | -5.5376184  | 3.8522324  | 167.3317342 |
| C  | -6.2585697  | 6.1030985  | 166.7488985 |
| C  | -6.4046548  | 3.3061701  | 166.3516504 |
| O  | -4.6599705  | 1.7426159  | 167.9726308 |
| H  | -7.7385648  | 6.2291193  | 165.1617611 |
| H  | -4.7705203  | 5.6610707  | 168.2751159 |

|    |            |            |             |
|----|------------|------------|-------------|
| H  | -7.8610340 | 3.7488386  | 164.8122929 |
| H  | -6.2045820 | 7.1924816  | 166.8913959 |
| H  | -6.4450678 | 2.2144693  | 166.2045095 |
| Br | -6.1420579 | -0.1366166 | 164.7772338 |
| Zn | -3.9549483 | 0.1698709  | 165.5505288 |
| H  | -3.1414235 | 5.4115798  | 163.2393018 |
| H  | -1.6157547 | 1.2098307  | 165.6747722 |
| C  | -3.3786243 | 3.2513848  | 163.5554165 |
| C  | -3.6797389 | 4.6785592  | 163.8815589 |
| H  | -3.5993364 | 2.7966607  | 162.5797899 |
| C  | -2.8318757 | 2.6373211  | 164.6428383 |
| C  | -2.4051510 | 1.2532954  | 164.9006386 |
| C  | -2.7699027 | 3.6669107  | 165.7181583 |
| O  | -3.2508092 | 4.8572375  | 165.2394813 |
| O  | -2.3964915 | 3.5504426  | 166.8774878 |
| H  | -4.7664016 | 4.9212564  | 163.8278414 |
| H  | -2.0465516 | 0.7504169  | 163.9802280 |
| H  | -0.8751765 | -1.8305477 | 162.9809908 |
| H  | -1.3014832 | -3.4580146 | 162.3934403 |
| H  | 0.2100471  | -3.2135263 | 163.3317440 |
| H  | -4.0566165 | 3.4587224  | 168.9194304 |

### 14q-mi

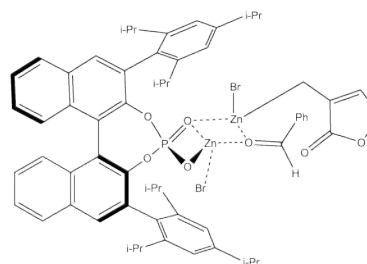

Energy (Hartree) = -11970.00758741

|   |            |            |             |
|---|------------|------------|-------------|
| C | -6.2753508 | -3.5518185 | 168.2093646 |
| C | -5.6635356 | -4.7856597 | 168.4696131 |
| C | -6.3466881 | -5.6928405 | 169.3604944 |
| C | -5.7364149 | -6.8847425 | 169.8543323 |
| C | -7.6803370 | -5.3704972 | 169.8072035 |
| C | -8.3579883 | -6.2711222 | 170.6820771 |
| C | -8.2985321 | -4.1689796 | 169.3570354 |
| H | -9.3476303 | -3.9734292 | 169.6272556 |
| C | -7.6207245 | -3.2413589 | 168.5754518 |
| C | -2.0468486 | -4.4503048 | 167.2044144 |
| C | -1.8621583 | -5.6739225 | 166.5709881 |
| H | -0.8950379 | -5.8915908 | 166.0914903 |
| C | -2.9159384 | -6.6274251 | 166.4541382 |
| C | -2.7313203 | -7.8365855 | 165.7187773 |
| C | -4.2161529 | -6.3358313 | 167.0135605 |
| C | -5.2886584 | -7.2331480 | 166.7304413 |
| C | -4.3747743 | -5.1409167 | 167.8097322 |
| C | -3.2944233 | -4.2622642 | 167.8768574 |
| O | -5.5817864 | -2.5648635 | 167.4846209 |
| O | -3.4103337 | -3.1356224 | 168.6824790 |
| P | -4.3175858 | -1.8602358 | 168.2416149 |
| O | -4.6286254 | -1.1069937 | 169.5518193 |
| O | -3.5817254 | -0.9044161 | 167.2660813 |
| C | -7.7430274 | -7.4307197 | 171.1283063 |
| C | -6.4165586 | -7.7304908 | 170.7190767 |
| H | -9.3796123 | -6.0183444 | 171.0064127 |
| H | -8.2748267 | -8.1128378 | 171.8089153 |
| H | -4.7064591 | -7.1214910 | 169.5527852 |
| H | -5.9202177 | -8.6379547 | 171.0953059 |
| C | -5.0794907 | -8.3893645 | 165.9910714 |
| C | -3.7873047 | -8.7071318 | 165.4965645 |
| H | -6.2959132 | -6.9975914 | 167.0998300 |
| H | -5.9254877 | -9.0620296 | 165.7832136 |



|   |             |            |             |    |            |            |             |
|---|-------------|------------|-------------|----|------------|------------|-------------|
| H | -3.6309948  | -9.6320111 | 164.9208490 | H  | 2.7976219  | -0.1125767 | 167.9983574 |
| H | -1.7317993  | -8.0540192 | 165.3103883 | H  | -1.2582257 | -4.2430702 | 169.5265967 |
| C | -8.3154061  | -0.7924245 | 168.6772512 | H  | -1.6610827 | -4.3195901 | 164.6392252 |
| C | -8.2915447  | -2.0347661 | 167.9903727 | H  | 0.6403393  | -1.0412784 | 168.9956118 |
| C | -8.9008337  | 0.3148752  | 168.0374343 | Zn | -3.5113422 | 0.5189668  | 169.1822315 |
| C | -8.8792748  | -2.1583964 | 166.7015301 | Br | -1.9864117 | 1.5386216  | 170.5416861 |
| C | -9.4587260  | -1.0203294 | 166.1127357 | C  | -7.0852656 | 5.5783154  | 165.8707564 |
| C | -9.4657342  | 0.2288852  | 166.7533884 | C  | -4.6007016 | 2.9935170  | 168.1534208 |
| H | -8.9113953  | 1.2897797  | 168.5500953 | C  | -7.1976371 | 4.1836518  | 165.7037975 |
| C | -8.8537064  | -3.4796721 | 165.9313602 | C  | -5.3578906 | 5.2662011  | 167.5436311 |
| H | -9.8958826  | -1.1124114 | 165.1074002 | C  | -5.4721207 | 3.8652752  | 167.3839188 |
| C | -7.7394790  | -3.4878346 | 164.8668320 | C  | -6.1680078 | 6.1202794  | 166.7893878 |
| H | -7.9268123  | -2.7190412 | 164.0891580 | C  | -6.3971332 | 3.3213350  | 166.4582826 |
| H | -7.6812187  | -4.4788041 | 164.3697222 | O  | -4.6232842 | 1.7454947  | 168.0238600 |
| H | -6.7509509  | -3.2558909 | 165.3077206 | H  | -7.7209878 | 6.2516096  | 165.2744995 |
| C | -10.2170201 | -3.8329319 | 165.3137604 | H  | -4.6107333 | 5.6716985  | 168.2429605 |
| H | -8.6163102  | -4.2825910 | 166.6595065 | H  | -7.9131634 | 3.7660310  | 164.9801805 |
| H | -10.5034867 | -3.1258171 | 164.5077789 | H  | -6.0799849 | 7.2106541  | 166.9050472 |
| H | -11.0240490 | -3.8220160 | 166.0742576 | H  | -6.4659528 | 2.2283244  | 166.3313374 |
| H | -10.1846405 | -4.8447619 | 164.8598045 | Br | -6.1480702 | -0.0721954 | 164.8279953 |
| C | -10.0956735 | 1.4601299  | 166.1122224 | Zn | -3.9387043 | 0.1587358  | 165.5514860 |
| C | -9.7940366  | 1.5851436  | 164.6104846 | H  | -3.2444251 | 5.3535345  | 163.1549069 |
| H | -10.1514802 | 2.5610431  | 164.2204411 | H  | -1.5928300 | 1.2028628  | 165.6018095 |
| H | -10.3094895 | 0.7979107  | 164.0220177 | C  | -3.4239335 | 3.1885205  | 163.4884504 |
| H | -8.7082350  | 1.4919452  | 164.4050473 | C  | -3.7551567 | 4.6110027  | 163.8097518 |
| C | -11.6124386 | 1.4966211  | 166.3815021 | H  | -3.6513172 | 2.7178524  | 162.5221652 |
| H | -9.6453643  | 2.3433079  | 166.6189503 | C  | -2.8490517 | 2.5962154  | 164.5731100 |
| H | -12.0729188 | 2.4167625  | 165.9643766 | C  | -2.3982429 | 1.2239955  | 164.8438026 |
| H | -11.8298638 | 1.4626989  | 167.4679888 | C  | -2.8014085 | 3.6348839  | 165.6414932 |
| H | -12.1127443 | 0.6228594  | 165.9135131 | O  | -3.3138690 | 4.8113707  | 165.1583636 |
| C | -7.7668647  | -0.6657514 | 170.0964149 | O  | -2.4204897 | 3.5323673  | 166.7984736 |
| C | -7.1205433  | 0.6976383  | 170.3844490 | H  | -4.8487402 | 4.8261142  | 163.7697854 |
| H | -6.5670697  | 0.6659432  | 171.3447467 | H  | -2.0574967 | 0.7062699  | 163.9250893 |
| H | -7.8730924  | 1.5098675  | 170.4652525 | H  | -0.8893637 | -1.8357349 | 162.9855900 |
| H | -6.4078083  | 0.9730900  | 169.5842488 | H  | -1.2942076 | -3.4684081 | 162.3995980 |
| C | -8.8660466  | -0.9745490 | 171.1316208 | H  | 0.2142120  | -3.2029016 | 163.3371403 |
| H | -6.9695047  | -1.4279988 | 170.2121731 | H  | -3.9202796 | 3.4560994  | 168.9064888 |
| H | -8.4650984  | -0.9101365 | 172.1645630 |    |            |            |             |
| H | -9.2843490  | -1.9909039 | 170.9928280 |    |            |            |             |
| H | -9.7042365  | -0.2519289 | 171.0421948 |    |            |            |             |
| H | 0.9707228   | 0.8070252  | 165.6791048 |    |            |            |             |
| H | 1.6308159   | -3.2486808 | 169.9522769 |    |            |            |             |
| C | 1.0981311   | 0.4643104  | 166.7303215 |    |            |            |             |
| H | -1.0325374  | -3.0622960 | 171.6896870 |    |            |            |             |
| H | 1.1383081   | 2.5095348  | 167.5080543 |    |            |            |             |
| H | -3.5942562  | -3.2444201 | 163.5456303 |    |            |            |             |
| C | 0.3200112   | -0.8392411 | 166.8627334 |    |            |            |             |
| C | 0.8469708   | -4.0310150 | 169.8761889 |    |            |            |             |
| C | 0.5616663   | 1.5725403  | 167.6514576 |    |            |            |             |
| H | 0.6414467   | 1.2930726  | 168.7215119 |    |            |            |             |
| C | 0.1839932   | -1.4907059 | 168.0999800 |    |            |            |             |
| C | -0.8522705  | -2.9129163 | 163.2514431 |    |            |            |             |
| H | 3.0006816   | -0.5489174 | 166.2736865 |    |            |            |             |
| C | -0.2479945  | -1.4539675 | 165.7340656 |    |            |            |             |
| C | 2.6032001   | 0.2266279  | 166.9592499 |    |            |            |             |
| H | 3.1801335   | 1.1607942  | 166.7981900 |    |            |            |             |
| H | -0.1304761  | -0.9556019 | 164.7603424 |    |            |            |             |
| C | -0.9828768  | -2.4911298 | 170.7400736 |    |            |            |             |
| H | 0.8348854   | -4.5930159 | 170.8331573 |    |            |            |             |
| H | 1.1487109   | -4.7291996 | 169.0692659 |    |            |            |             |
| C | -0.5122186  | -2.7050730 | 168.2321651 |    |            |            |             |
| C | -3.0929620  | -2.7544665 | 164.4050645 |    |            |            |             |
| C | -0.9709325  | -2.6581532 | 165.8068073 |    |            |            |             |
| C | -0.5328230  | -3.4058826 | 169.5892745 |    |            |            |             |
| C | -1.1180539  | -3.2834439 | 167.0827022 |    |            |            |             |
| C | -1.6307998  | -3.2170574 | 164.5402737 |    |            |            |             |
| H | -1.9864844  | -2.0638607 | 170.5518473 |    |            |            |             |
| H | -3.6939321  | -2.9706118 | 165.3089415 |    |            |            |             |
| H | -0.2841047  | -1.6450396 | 170.9010070 |    |            |            |             |
| H | -0.5032512  | 1.8086521  | 167.4556025 |    |            |            |             |
| H | -3.1357741  | -1.6593398 | 164.2132910 |    |            |            |             |

### 14r-ma; COSMO

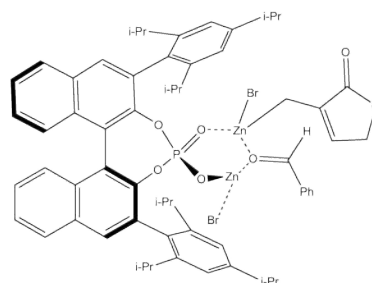

Energy (Hartree) = -11970.02802157

|   |             |             |              |
|---|-------------|-------------|--------------|
| C | -37.1598294 | -57.5103979 | 1188.2590994 |
| C | -36.4363401 | -58.6254684 | 1188.6957964 |
| C | -37.0161057 | -59.4266789 | 1189.7473462 |
| C | -36.3036720 | -60.4756158 | 1190.4029419 |
| C | -38.3621800 | -59.1373007 | 1190.1844025 |
| C | -38.9508629 | -59.9422507 | 1191.2060753 |
| C | -39.0724254 | -58.0421810 | 1189.6131227 |
| H | -40.1039897 | -57.8471948 | 1189.9443966 |
| C | -38.4855211 | -57.1916006 | 1188.6825916 |
| C | -32.8011156 | -58.2150950 | 1187.4832186 |
| C | -32.5117514 | -59.5027171 | 1187.0491029 |
| H | -31.5011325 | -59.7336336 | 1186.6793578 |
| C | -33.5028402 | -60.5264385 | 1187.0258932 |
| C | -33.2101030 | -61.8182168 | 1186.4932089 |
| C | -34.8350458 | -60.2480226 | 1187.5103234 |
| C | -35.8282954 | -61.2639115 | 1187.3706968 |
| C | -35.1167445 | -58.9496231 | 1188.0788739 |
| C | -34.1129549 | -57.9798126 | 1187.9968713 |

|   |             |             |              |    |             |             |              |
|---|-------------|-------------|--------------|----|-------------|-------------|--------------|
| O | -36.6003699 | -56.6752794 | 1187.2995513 | H  | -26.9442893 | -53.3840834 | 1186.6852581 |
| O | -34.3546377 | -56.7025338 | 1188.4976008 | H  | -30.3197473 | -54.9919569 | 1185.1422271 |
| P | -35.3542539 | -55.6902394 | 1187.7021251 | C  | -32.2381062 | -56.0162805 | 1190.9153114 |
| O | -35.7180045 | -54.6178267 | 1188.7430893 | H  | -30.6469613 | -58.1984293 | 1191.6005266 |
| O | -34.8173647 | -55.2058702 | 1186.3436949 | H  | -29.9868860 | -58.5471682 | 1189.9669848 |
| C | -38.2388458 | -60.9713411 | 1191.8037887 | C  | -31.2972539 | -56.5198962 | 1188.6051561 |
| C | -36.8990813 | -61.2275053 | 1191.4067680 | C  | -32.5711782 | -55.9973152 | 1183.8968070 |
| H | -39.9817305 | -59.7175735 | 1191.5219746 | C  | -31.4749967 | -56.5248903 | 1186.1469437 |
| H | -38.7029339 | -61.5793397 | 1192.5952451 | H  | -30.5600789 | -58.7449542 | 1184.7575841 |
| H | -35.2633939 | -60.6790753 | 1190.1128754 | H  | -30.0632510 | -57.2928578 | 1183.8404452 |
| H | -36.3249560 | -62.0250650 | 1191.9026238 | C  | -31.6284175 | -57.0817191 | 1189.9865019 |
| C | -35.5155526 | -62.5036284 | 1186.8294281 | C  | -31.8259878 | -57.0810732 | 1187.4112377 |
| C | -34.1924223 | -62.7928051 | 1186.4014162 | C  | -32.0130559 | -57.0838827 | 1184.8297106 |
| H | -36.8588108 | -61.0532892 | 1187.6878099 | H  | -33.1325698 | -55.5528191 | 1190.4552031 |
| H | -36.3026013 | -63.2662365 | 1186.7266515 | H  | -33.3596718 | -55.4078188 | 1184.3998090 |
| H | -33.9541986 | -63.7822759 | 1185.9823373 | H  | -31.5108392 | -55.2102838 | 1191.1471933 |
| H | -32.1867311 | -62.0198895 | 1186.1394811 | H  | -30.0525433 | -52.4474899 | 1188.6855748 |
| C | -39.5005339 | -54.8956167 | 1189.0065563 | H  | -31.7816271 | -55.3003885 | 1183.5451817 |
| C | -39.1851373 | -55.9836034 | 1188.1408980 | H  | -27.2664305 | -54.8550489 | 1187.6645818 |
| C | -40.1905528 | -53.7881576 | 1188.4785077 | H  | -32.3885543 | -57.8785396 | 1189.8568864 |
| C | -39.5380579 | -55.9128539 | 1186.7622827 | H  | -32.8579581 | -57.7592522 | 1185.0744141 |
| C | -40.2277993 | -54.7799698 | 1186.2897941 | H  | -30.0101896 | -55.0022708 | 1189.4456281 |
| C | -40.5730097 | -53.7073528 | 1187.1289476 | Zn | -35.8181871 | -52.6979992 | 1188.2291316 |
| H | -40.4194506 | -52.9366689 | 1189.1375010 | Br | -35.4163662 | -50.9714448 | 1189.7228598 |
| C | -39.2342978 | -57.0369591 | 1185.7718626 | C  | -29.9212544 | -50.9986832 | 1184.3166878 |
| H | -40.5070624 | -54.7416527 | 1185.2255469 | C  | -33.0356049 | -51.7247249 | 1187.1150170 |
| C | -38.3584390 | -56.5511221 | 1184.6016997 | C  | -30.9033672 | -51.9641475 | 1184.0169941 |
| H | -38.8732623 | -55.7762542 | 1183.9960454 | C  | -30.9913709 | -50.5275390 | 1186.4421775 |
| H | -38.1138018 | -57.3931440 | 1183.9218588 | C  | -31.9846736 | -51.4949262 | 1186.1445666 |
| H | -37.4019687 | -56.1277510 | 1184.9665747 | C  | -29.9637042 | -50.2805444 | 1185.5267287 |
| C | -40.5320684 | -57.6979874 | 1185.2698503 | C  | -31.9336008 | -52.2167637 | 1184.9245209 |
| H | -38.6630909 | -57.8225444 | 1186.3053756 | O  | -34.0009614 | -52.5048840 | 1186.9454547 |
| H | -41.1597107 | -56.9808122 | 1184.7007739 | H  | -29.1094732 | -50.8067118 | 1183.5982130 |
| H | -41.1402946 | -58.0794398 | 1186.1150737 | H  | -31.0374391 | -49.9770472 | 1187.3947592 |
| H | -40.3032485 | -58.5508848 | 1184.5977437 | H  | -30.8602794 | -52.5220261 | 1183.0697479 |
| C | -41.3663935 | -52.5031382 | 1186.6373131 | H  | -29.1902842 | -49.5317821 | 1185.7523719 |
| C | -41.0138395 | -52.0683423 | 1185.2070485 | H  | -32.7042626 | -52.9671979 | 1184.7003349 |
| H | -41.5321065 | -51.1211603 | 1184.9529827 | Br | -35.2171188 | -53.0700154 | 1183.3279478 |
| H | -41.3273481 | -52.8223155 | 1184.4548780 | Zn | -35.4451992 | -53.4692283 | 1185.6109044 |
| H | -39.9242152 | -51.9028649 | 1185.0856749 | H  | -37.0555830 | -48.2704864 | 1185.5337907 |
| C | -42.8781329 | -52.7723953 | 1186.7759169 | H  | -37.6332788 | -53.3382464 | 1185.7820845 |
| H | -41.1090208 | -51.6631478 | 1187.3177899 | C  | -37.2231845 | -50.4289670 | 1185.2362361 |
| H | -43.4696230 | -51.8806313 | 1186.4810307 | C  | -37.8189486 | -49.0795943 | 1185.4842107 |
| H | -43.1462002 | -53.0340401 | 1187.8193432 | H  | -36.6450456 | -50.6884814 | 1184.3370867 |
| H | -43.1873536 | -53.6187038 | 1186.1266522 | C  | -37.5234366 | -51.2437783 | 1186.2778785 |
| C | -39.1185396 | -54.8693463 | 1190.4871869 | C  | -37.2131098 | -52.6665383 | 1186.5703725 |
| C | -38.2662967 | -53.6384532 | 1190.8441398 | C  | -38.3320561 | -50.4428937 | 1187.2493505 |
| H | -38.0351559 | -53.6260047 | 1191.9290909 | O  | -38.4804312 | -49.1730009 | 1186.7513939 |
| H | -38.7690891 | -52.6828534 | 1190.5930637 | O  | -38.8264888 | -50.7973237 | 1188.3021322 |
| H | -37.3005316 | -53.6620024 | 1190.3050651 | H  | -38.5641263 | -48.7858971 | 1184.7103947 |
| C | -40.3713445 | -54.9592910 | 1191.3792366 | H  | -37.8476070 | -52.9962008 | 1187.4315833 |
| H | -38.4963013 | -55.7627626 | 1190.6951777 | H  | -32.9932517 | -51.1683125 | 1188.0832835 |
| H | -40.0877345 | -55.0000703 | 1192.4512306 |    |             |             |              |
| H | -40.9736211 | -55.8618597 | 1191.1485205 |    |             |             |              |
| H | -41.0284862 | -54.0757515 | 1191.2380747 |    |             |             |              |
| H | -29.4021309 | -53.0894001 | 1186.3047557 |    |             |             |              |
| H | -29.5792261 | -57.0092775 | 1190.7899547 |    |             |             |              |
| H | -31.3377373 | -58.3714646 | 1183.1835327 |    |             |             |              |
| C | -29.0663309 | -53.7018300 | 1187.1701216 |    |             |             |              |
| H | -32.5437911 | -56.4718966 | 1191.8797273 |    |             |             |              |
| H | -28.4202095 | -51.8863391 | 1188.1978896 |    |             |             |              |
| H | -33.0213962 | -56.4575490 | 1182.9936259 |    |             |             |              |
| C | -30.0499646 | -54.8612990 | 1187.2825987 |    |             |             |              |
| C | -30.3914589 | -57.7467973 | 1190.6195298 |    |             |             |              |
| C | -29.0357920 | -52.7861332 | 1188.4007617 |    |             |             |              |
| H | -28.5912465 | -53.2941317 | 1189.2818644 |    |             |             |              |
| C | -30.4172625 | -55.4249023 | 1188.5149820 |    |             |             |              |
| C | -30.9355536 | -57.9227628 | 1184.1154884 |    |             |             |              |
| H | -27.6586074 | -54.8424661 | 1185.9175446 |    |             |             |              |
| C | -30.5920517 | -55.4305923 | 1186.1159624 |    |             |             |              |
| C | -27.6542054 | -54.2238743 | 1186.8375376 |    |             |             |              |

### 14r-ma

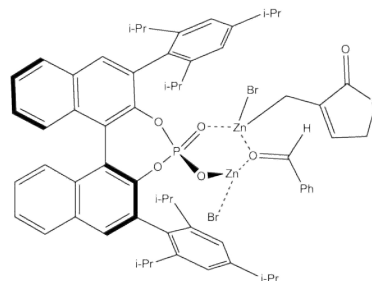

Energy (Hartree) = -11970.01356987

|   |             |             |              |
|---|-------------|-------------|--------------|
| C | -37.1790914 | -57.5122436 | 1188.2619685 |
| C | -36.4252487 | -58.5985834 | 1188.7158318 |
| C | -36.9679933 | -59.3829634 | 1189.7988658 |
| C | -36.2218040 | -60.3987169 | 1190.4681065 |
| C | -38.3121757 | -59.1107997 | 1190.2514583 |

|   |             |             |              |    |             |             |              |
|---|-------------|-------------|--------------|----|-------------|-------------|--------------|
| C | -38.8639857 | -59.8996686 | 1191.3050421 | C  | -28.7174538 | -54.0217069 | 1186.9290201 |
| C | -39.0563341 | -58.0491074 | 1189.6610323 | H  | -32.4740682 | -56.2432879 | 1191.7306701 |
| H | -40.0869132 | -57.8677938 | 1190.0029318 | H  | -28.0731521 | -52.0675192 | 1187.6787626 |
| C | -38.5053127 | -57.2112726 | 1188.6977406 | H  | -33.1747455 | -56.3646815 | 1182.9627482 |
| C | -32.8242212 | -58.1765603 | 1187.4116607 | C  | -29.8436725 | -55.0384593 | 1187.0708225 |
| C | -32.5338713 | -59.4728978 | 1187.0035610 | C  | -30.3966014 | -57.6880877 | 1190.5487063 |
| H | -31.5272675 | -59.7016506 | 1186.6213307 | C  | -28.8521578 | -52.8290847 | 1187.8881146 |
| C | -33.5138076 | -60.5054246 | 1187.0249069 | H  | -28.7312314 | -53.1377734 | 1188.9471517 |
| C | -33.2218858 | -61.8074061 | 1186.5184819 | C  | -30.2551547 | -55.5136548 | 1188.3277721 |
| C | -34.8354524 | -60.2251850 | 1187.5340405 | C  | -31.1112820 | -57.9656922 | 1183.9280285 |
| C | -35.8220388 | -61.2532250 | 1187.4448790 | H  | -27.2296016 | -55.5406340 | 1186.3602109 |
| C | -35.1155394 | -58.9152813 | 1188.0761325 | C  | -30.4669886 | -55.5781422 | 1185.9336454 |
| C | -34.1267651 | -57.9337461 | 1187.9439027 | C  | -27.3481327 | -54.7110082 | 1187.0857022 |
| O | -36.6468958 | -56.6924876 | 1187.2730709 | H  | -26.5174055 | -53.9915142 | 1186.9290432 |
| O | -34.3674008 | -56.6460955 | 1188.4143061 | H  | -30.1634469 | -55.2067212 | 1184.9411284 |
| P | -35.4300864 | -55.6651119 | 1187.6559917 | C  | -32.1610342 | -55.8579343 | 1190.7384794 |
| O | -35.8161400 | -54.6233498 | 1188.7182724 | H  | -30.6840908 | -58.0850590 | 1191.5442052 |
| O | -34.9357595 | -55.1502363 | 1186.2920558 | H  | -30.0208255 | -58.5330933 | 1189.9367620 |
| C | -38.1196190 | -60.8963676 | 1191.9169537 | C  | -31.2322512 | -56.5152217 | 1188.4677565 |
| C | -36.7827315 | -61.1353776 | 1191.5020479 | C  | -32.6596228 | -55.9540307 | 1183.8550228 |
| H | -39.8935484 | -59.6880427 | 1191.6338765 | C  | -31.4581645 | -56.5748951 | 1186.0146861 |
| H | -38.5562753 | -61.4918074 | 1192.7331190 | H  | -30.7423508 | -58.8209954 | 1184.5292620 |
| H | -35.1833690 | -60.5878113 | 1190.1622313 | H  | -30.2244808 | -57.3788864 | 1183.6084039 |
| H | -36.1830262 | -61.9073534 | 1192.0079062 | C  | -31.5945897 | -56.9969058 | 1189.8713802 |
| C | -35.5106694 | -62.5033611 | 1186.9287364 | C  | -31.8251979 | -57.0671007 | 1187.2982912 |
| C | -34.1962712 | -62.7923081 | 1186.4758863 | C  | -32.0967494 | -57.0904589 | 1184.7248119 |
| H | -36.8461706 | -61.0429900 | 1187.7817193 | H  | -33.0449523 | -55.3943963 | 1190.2588215 |
| H | -36.2929243 | -63.2750521 | 1186.8652673 | H  | -33.3975515 | -55.3509959 | 1184.4157516 |
| H | -33.9590905 | -63.7901544 | 1186.0766899 | H  | -31.4054437 | -55.0639572 | 1190.9154025 |
| H | -32.2054072 | -62.0084842 | 1186.1451404 | H  | -29.8417207 | -52.3415351 | 1187.7889883 |
| C | -39.5716664 | -54.9318866 | 1188.9720875 | H  | -31.8630001 | -55.2754225 | 1183.4836220 |
| C | -39.2348751 | -56.0333060 | 1188.1328011 | H  | -27.2388565 | -55.1401865 | 1188.1036949 |
| C | -40.2588256 | -53.8387489 | 1188.4107440 | H  | -32.3910908 | -57.7617862 | 1189.7738637 |
| C | -39.5827984 | -56.0008487 | 1186.7511347 | H  | -32.9569277 | -57.7292784 | 1185.0108757 |
| C | -40.2719746 | -54.8832527 | 1186.2462863 | H  | -29.7892874 | -55.1032447 | 1189.2373468 |
| C | -40.6232621 | -53.7894582 | 1187.0553660 | Zn | -35.9514947 | -52.6864733 | 1188.3168903 |
| H | -40.4986729 | -52.9726884 | 1189.0458104 | Br | -35.6929955 | -50.9336812 | 1189.8064606 |
| C | -39.2826186 | -57.1569027 | 1185.7917103 | C  | -30.0003298 | -50.8721655 | 1184.6323054 |
| H | -40.5483897 | -54.8736368 | 1185.1803127 | C  | -33.2319560 | -51.5594830 | 1187.3014972 |
| C | -38.4371108 | -56.7085164 | 1184.5911384 | C  | -30.7885286 | -52.0278755 | 1184.4776230 |
| H | -38.9828076 | -55.9813033 | 1183.9542471 | C  | -31.3266565 | -50.1859895 | 1186.5427257 |
| H | -38.1791050 | -57.5772450 | 1183.9510836 | C  | -32.1303225 | -51.3437849 | 1186.3861674 |
| H | -37.4891801 | -56.2395703 | 1184.9206338 | C  | -30.2652255 | -49.9517907 | 1185.6647553 |
| C | -40.5830982 | -57.8514074 | 1185.3504134 | C  | -31.8508779 | -52.2721570 | 1185.3504992 |
| H | -38.6913531 | -57.9150408 | 1186.3482028 | O  | -34.0596379 | -52.4926803 | 1187.1829607 |
| H | -41.2338648 | -57.1616435 | 1184.7735714 | H  | -29.1628048 | -50.6878110 | 1183.9417384 |
| H | -41.1662033 | -58.2096961 | 1186.2228140 | H  | -31.5491031 | -49.4779633 | 1187.3567033 |
| H | -40.3607981 | -58.7244643 | 1184.7023502 | H  | -30.5719810 | -52.7431412 | 1183.6704376 |
| C | -41.4098543 | -52.6001903 | 1186.5188592 | H  | -29.6388299 | -49.0548642 | 1185.7791673 |
| C | -40.9310538 | -52.1204090 | 1185.1400201 | H  | -32.4614556 | -53.1795655 | 1185.2539764 |
| H | -41.4698440 | -51.1977777 | 1184.8418412 | Br | -34.8986218 | -52.6566512 | 1183.5279550 |
| H | -41.1174201 | -52.8757708 | 1184.3479787 | Zn | -35.4514116 | -53.3355348 | 1185.6797045 |
| H | -39.8461377 | -51.8928381 | 1185.1408111 | H  | -36.8386833 | -48.0920745 | 1186.0810288 |
| C | -42.9167553 | -52.9226457 | 1186.5011261 | H  | -37.6387689 | -53.1335732 | 1185.6930487 |
| H | -41.2451897 | -51.7681343 | 1187.2360286 | C  | -37.0249026 | -50.1904858 | 1185.5051996 |
| H | -43.5086208 | -52.0439549 | 1186.1699827 | C  | -37.6131136 | -48.8507056 | 1185.8228249 |
| H | -43.2755511 | -53.2203675 | 1187.5067933 | H  | -36.3251186 | -50.3797196 | 1184.6771822 |
| H | -43.1335235 | -53.7616651 | 1185.8065095 | C  | -37.4973202 | -51.0987769 | 1186.3935429 |
| C | -39.2236933 | -54.8764091 | 1190.4602272 | C  | -37.2546290 | -52.5541152 | 1186.5687969 |
| C | -38.3865334 | -53.6362430 | 1190.8173502 | C  | -38.4243123 | -50.3741144 | 1187.3236112 |
| H | -38.1923652 | -53.5949233 | 1191.9086382 | O  | -38.4604206 | -49.0515515 | 1186.9550388 |
| H | -38.8764623 | -52.6858244 | 1190.5247718 | O  | -39.0818710 | -50.8209643 | 1188.2405110 |
| H | -37.4004581 | -53.6753817 | 1190.3173658 | H  | -38.2193765 | -48.4318266 | 1184.9869163 |
| C | -40.4989112 | -54.9570404 | 1191.3210606 | H  | -37.9466182 | -52.9426368 | 1187.3575908 |
| H | -38.6030409 | -55.7625745 | 1190.7005858 | H  | -33.3648905 | -50.8609687 | 1188.1655071 |
| H | -40.2436206 | -54.9808241 | 1192.4006369 |    |             |             |              |
| H | -41.0937362 | -55.8640152 | 1191.0879725 |    |             |             |              |
| H | -41.1549303 | -54.0782342 | 1191.1499945 |    |             |             |              |
| H | -28.7756674 | -53.6230858 | 1185.8920422 |    |             |             |              |
| H | -29.5526410 | -56.9832391 | 1190.7009847 |    |             |             |              |
| H | -31.5939238 | -58.3718064 | 1183.0152040 |    |             |             |              |

14r-mi; COSMO

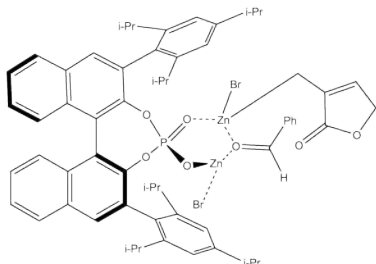

Energy (Hartree) = -11970.02930968

|    |            |            |            |
|----|------------|------------|------------|
| C  | -0.7567167 | 7.1511169  | 73.1961049 |
| C  | 0.2534591  | 7.0484504  | 77.3205334 |
| C  | 0.0544651  | 6.1078699  | 73.6848314 |
| C  | -0.8986448 | 8.1244047  | 75.4137328 |
| C  | -0.0823170 | 7.0779484  | 75.9123182 |
| C  | -1.2310587 | 8.1599302  | 74.0562381 |
| C  | 0.3971032  | 6.0686486  | 75.0372628 |
| O  | 1.0568537  | 6.2214593  | 77.8101083 |
| H  | -1.0239665 | 7.1773609  | 72.1283625 |
| H  | -1.2590907 | 8.9073905  | 76.0988534 |
| H  | 0.4188154  | 5.3260626  | 73.0023075 |
| H  | -1.8606476 | 8.9711026  | 73.6619820 |
| H  | 1.0241407  | 5.2623382  | 75.4423684 |
| Br | 3.9047347  | 6.6396707  | 75.5906338 |
| Zn | 3.2231084  | 5.4834545  | 77.4953530 |
| H  | 5.9959703  | 10.0524341 | 79.3384425 |
| H  | 3.9163869  | 5.4838160  | 80.4067409 |
| C  | 4.5186265  | 8.5035502  | 78.8818516 |
| C  | 5.0245944  | 9.6476202  | 79.7023786 |
| H  | 4.2793955  | 8.5744952  | 77.8106507 |
| C  | 4.4096674  | 7.4100191  | 79.6729496 |
| C  | 3.9556427  | 6.0172976  | 79.4257776 |
| C  | 4.8588368  | 7.8017936  | 81.0429086 |
| O  | 5.2045205  | 9.1298274  | 81.0263147 |
| O  | 4.9460174  | 7.1070132  | 82.0369226 |
| H  | 4.3033318  | 10.4951300 | 79.7414943 |
| H  | 4.7810286  | 5.4159566  | 78.9602045 |
| C  | 0.0162101  | 1.2374432  | 79.1781083 |
| C  | 0.7000601  | 0.0344212  | 79.3932318 |
| C  | 0.1203936  | -0.9068164 | 80.3237739 |
| C  | 0.7992806  | -2.0832563 | 80.7636697 |
| C  | -1.1898966 | -0.6351487 | 80.8669728 |
| C  | -1.7919625 | -1.5843374 | 81.7473320 |
| C  | -1.8309168 | 0.6042286  | 80.5801416 |
| H  | -2.8078407 | 0.8138635  | 81.0411352 |
| C  | -1.2216555 | 1.5819836  | 79.8030449 |
| C  | 4.2951330  | 0.6422403  | 78.1709670 |
| C  | 4.5971046  | -0.5776968 | 77.5775005 |
| H  | 5.5923506  | -0.7297465 | 77.1327366 |
| C  | 3.6242857  | -1.6112079 | 77.4495558 |
| C  | 3.9254854  | -2.8180175 | 76.7485727 |
| C  | 2.2913090  | -1.4104886 | 77.9687476 |
| C  | 1.3022201  | -2.4000513 | 77.6853976 |
| C  | 2.0074915  | -0.2091385 | 78.7183219 |
| C  | 3.0065196  | 0.7698248  | 78.7759121 |
| O  | 0.5455381  | 2.1724265  | 78.2863152 |
| O  | 2.7609727  | 1.9459912  | 79.4796740 |
| P  | 1.8074372  | 3.0851412  | 78.7852686 |
| O  | 1.4549548  | 4.0547509  | 79.9218389 |
| O  | 2.4153566  | 3.6700003  | 77.4967662 |
| C  | -1.1196199 | -2.7380123 | 82.1212036 |
| C  | 0.1950270  | -2.9757887 | 81.6387716 |
| H  | -2.7971612 | -1.3687750 | 82.1424834 |
| H  | -1.5921269 | -3.4577482 | 82.8068724 |
| H  | 1.8207727  | -2.2777194 | 80.4095105 |
| H  | 0.7437722  | -3.8722256 | 81.9657495 |
| C  | 1.6223011  | -3.5530862 | 76.9813507 |

|   |            |            |            |
|---|------------|------------|------------|
| C | 2.9485562  | -3.7763516 | 76.5240559 |
| H | 0.2699370  | -2.2380324 | 78.0249040 |
| H | 0.8390817  | -4.2975714 | 76.7716805 |
| H | 3.1927844  | -4.6989697 | 75.9758083 |
| H | 4.9495699  | -2.9631474 | 76.3700911 |
| C | -1.6168522 | 3.8429002  | 80.8399686 |
| C | -1.7384457 | 2.9847918  | 79.7040481 |
| C | -2.0408647 | 5.1754850  | 80.7214449 |
| C | -2.2658108 | 3.4906193  | 78.4894641 |
| C | -2.6988635 | 4.8317694  | 78.4336729 |
| C | -2.6003947 | 5.6946721  | 79.5374016 |
| H | -1.9207921 | 5.8459773  | 81.5856470 |
| C | -2.4076346 | 2.6175795  | 77.2446180 |
| H | -3.1258821 | 5.2015904  | 77.4899427 |
| C | -1.6463806 | 3.2028590  | 76.0417520 |
| H | -2.0669421 | 4.1800184  | 75.7244058 |
| H | -1.7053215 | 2.5185623  | 75.1700420 |
| H | -0.5774079 | 3.3527774  | 76.2885492 |
| C | -3.8892729 | 2.3644644  | 76.9093775 |
| H | -1.9542922 | 1.6310364  | 77.4727904 |
| H | -4.4142636 | 3.3104293  | 76.6596939 |
| H | -4.4211115 | 1.9017068  | 77.7653755 |
| H | -3.9857895 | 1.6860143  | 76.0363010 |
| C | -3.0739493 | 7.1469829  | 79.5135810 |
| C | -3.5499971 | 7.6314686  | 78.1396094 |
| H | -3.7852259 | 8.7144464  | 78.1704587 |
| H | -4.4722790 | 7.1012825  | 77.8212555 |
| H | -2.7909824 | 7.4728456  | 77.3488340 |
| C | -4.1741332 | 7.3887506  | 80.5669881 |
| H | -2.1912959 | 7.7603565  | 79.8129060 |
| H | -4.4664635 | 8.4588049  | 80.5920412 |
| H | -3.8432924 | 7.1059468  | 81.5854615 |
| H | -5.0791609 | 6.7912605  | 80.3283100 |
| C | -1.0695301 | 3.3552021  | 82.1830545 |
| C | -0.0785326 | 4.3280560  | 82.8429087 |
| H | 0.3393344  | 3.8734795  | 83.7643456 |
| H | -0.5560867 | 5.2849550  | 83.1367889 |
| H | 0.7611517  | 4.5645938  | 82.1643706 |
| C | -2.2297900 | 3.0398751  | 83.1491032 |
| H | -0.5180251 | 2.4112852  | 81.9973357 |
| H | -1.8455276 | 2.6313307  | 84.1067658 |
| H | -2.9385282 | 2.3026380  | 82.7223743 |
| H | -2.8069816 | 3.9602987  | 83.3785006 |
| H | 6.7204745  | 6.2833415  | 77.2171987 |
| H | 7.7516553  | 2.0602919  | 81.2249886 |
| H | 5.4921814  | 0.7621698  | 73.7832834 |
| C | 7.4283330  | 5.5889892  | 77.7285580 |
| H | 4.9216148  | 2.2505836  | 82.6258771 |
| H | 8.2695263  | 7.2370164  | 78.8841257 |
| H | 3.5668859  | 2.4040142  | 73.7658190 |
| C | 6.6732074  | 4.2690993  | 77.8764502 |
| C | 7.0135605  | 1.2408528  | 81.0977241 |
| C | 7.8377289  | 6.2313136  | 79.0594086 |
| H | 8.6083639  | 5.6272422  | 79.5825097 |
| C | 6.5336481  | 3.5990423  | 79.1031624 |
| C | 5.8974767  | 1.2533626  | 74.6922339 |
| H | 8.3754028  | 5.0152417  | 75.8171717 |
| C | 6.0580928  | 3.6912728  | 76.7464389 |
| C | 8.6541426  | 5.4243357  | 76.8084220 |
| H | 9.1558416  | 6.4000560  | 76.6440195 |
| H | 6.1433675  | 4.2075300  | 75.7777922 |
| C | 5.0334132  | 2.7488956  | 81.6410739 |
| H | 6.9073300  | 0.7305865  | 82.0772949 |
| H | 7.4378276  | 0.5147454  | 80.3747652 |
| C | 5.7806120  | 2.4141487  | 79.2320637 |
| C | 3.9786539  | 2.9099460  | 74.6633583 |
| C | 5.3339892  | 2.4874506  | 76.8092269 |
| H | 6.4483498  | 0.4903276  | 75.2785825 |
| H | 6.6351025  | 2.0166721  | 74.3663551 |
| C | 5.6536543  | 1.7806667  | 80.6155972 |
| C | 5.1824979  | 1.8454790  | 78.0773358 |

|    |            |           |            |
|----|------------|-----------|------------|
| C  | 4.7657163  | 1.9010880 | 75.5152360 |
| H  | 4.0287210  | 3.0810883 | 81.3151034 |
| H  | 3.1355174  | 3.3362566 | 75.2387107 |
| H  | 5.6603407  | 3.6514955 | 81.7967086 |
| H  | 6.9804730  | 6.3509928 | 79.7509886 |
| H  | 4.6074925  | 3.7519383 | 74.3093964 |
| H  | 9.3924370  | 4.7318220 | 77.2645673 |
| H  | 4.9720375  | 0.9098677 | 80.5268034 |
| H  | 4.0544081  | 1.0985327 | 75.7928950 |
| Zn | 1.8028801  | 6.0107827 | 79.7983585 |
| Br | 0.8563983  | 7.7683927 | 80.9824405 |
| H  | 6.9987408  | 4.0207738 | 80.0056361 |
| H  | -0.2194619 | 7.7951623 | 78.0040352 |

## 14r-mi

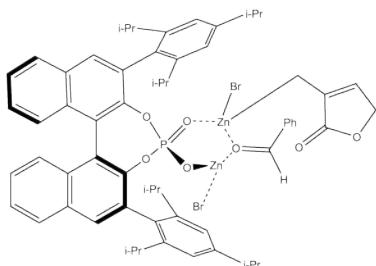

Energy (Hartree) = -11970.0159672

|    |            |            |            |
|----|------------|------------|------------|
| C  | -0.7307396 | 7.2074291  | 73.1917039 |
| C  | 0.2482136  | 7.0353349  | 77.3242018 |
| C  | 0.0778575  | 6.1587667  | 73.6701505 |
| C  | -0.8943811 | 8.1413813  | 75.4241253 |
| C  | -0.0817260 | 7.0885933  | 75.9124924 |
| C  | -1.2151185 | 8.1998388  | 74.0647068 |
| C  | 0.4079465  | 6.0962266  | 75.0252559 |
| O  | 1.0432869  | 6.1967019  | 77.8002387 |
| H  | -0.9877611 | 7.2522880  | 72.1219755 |
| H  | -1.2637125 | 8.9105927  | 76.1201951 |
| H  | 0.4537686  | 5.3901092  | 72.9790571 |
| H  | -1.8429963 | 9.0164215  | 73.6787676 |
| H  | 1.0353894  | 5.2863682  | 75.4222460 |
| Br | 3.8920313  | 6.6424446  | 75.6070137 |
| Zn | 3.2412437  | 5.4740101  | 77.5114034 |
| H  | 6.0103307  | 10.0269044 | 79.3268322 |
| H  | 3.8887641  | 5.4806057  | 80.4336101 |
| C  | 4.5108955  | 8.4881249  | 78.9039582 |
| C  | 5.0507172  | 9.6210786  | 79.7218657 |
| H  | 4.2393654  | 8.5665742  | 77.8407711 |
| C  | 4.4192569  | 7.3901766  | 79.6892444 |
| C  | 3.9473710  | 6.0028235  | 79.4468001 |
| C  | 4.9193692  | 7.7640272  | 81.0494022 |
| O  | 5.2738378  | 9.0924542  | 81.0306866 |
| O  | 5.0365408  | 7.0560545  | 82.0274718 |
| H  | 4.3335580  | 10.4709867 | 79.7921220 |
| H  | 4.7733459  | 5.3835441  | 79.0053327 |
| C  | 0.0188685  | 1.2329876  | 79.1810357 |
| C  | 0.7015475  | 0.0299785  | 79.4008021 |
| C  | 0.1198530  | -0.9081758 | 80.3328600 |
| C  | 0.7967114  | -2.0842644 | 80.7760348 |
| C  | -1.1904759 | -0.6338209 | 80.8741590 |
| C  | -1.7935339 | -1.5802910 | 81.7559956 |
| C  | -1.8294736 | 0.6052753  | 80.5831520 |
| H  | -2.8061073 | 0.8188387  | 81.0429427 |
| C  | -1.2193056 | 1.5804675  | 79.8038534 |
| C  | 4.2956356  | 0.6393603  | 78.1769444 |
| C  | 4.5983207  | -0.5807852 | 77.5847985 |
| H  | 5.5928305  | -0.7298708 | 77.1372983 |
| C  | 3.6279741  | -1.6167516 | 77.4607375 |

|   |            |            |            |
|---|------------|------------|------------|
| C | 3.9297687  | -2.8245309 | 76.7626514 |
| C | 2.2955345  | -1.4173780 | 77.9814309 |
| C | 1.3084078  | -2.4096962 | 77.7019671 |
| C | 2.0101774  | -0.2150371 | 78.7285946 |
| C | 3.0080454  | 0.7653571  | 78.7847177 |
| O | 0.5499372  | 2.1649074  | 78.2885415 |
| O | 2.7622158  | 1.9411201  | 79.4871474 |
| P | 1.8091375  | 3.0800789  | 78.7911454 |
| O | 1.4508316  | 4.0482869  | 79.9264297 |
| O | 2.4197634  | 3.6653230  | 77.5044927 |
| C | -1.1234757 | -2.7336781 | 82.1328249 |
| C | 0.1906354  | -2.9740699 | 81.6519359 |
| H | -2.7985737 | -1.3622676 | 82.1501798 |
| H | -1.5975191 | -3.4510447 | 82.8198244 |
| H | 1.8180605  | -2.2798054 | 80.4223294 |
| H | 0.7380827  | -3.8704504 | 81.9810567 |
| C | 1.6298418  | -3.5638828 | 77.0013017 |
| C | 2.9552125  | -3.7855244 | 76.5424986 |
| H | 0.2768331  | -2.2480956 | 78.0434589 |
| H | 0.8478453  | -4.3106520 | 76.7954767 |
| H | 3.2008014  | -4.7090536 | 75.9964994 |
| H | 4.9535015  | -2.9681647 | 76.3826689 |
| C | -1.6200482 | 3.8429749  | 80.8354847 |
| C | -1.7362613 | 2.9828945  | 79.7005699 |
| C | -2.0471003 | 5.1739835  | 80.7136134 |
| C | -2.2599573 | 3.4861802  | 78.4834807 |
| C | -2.6980058 | 4.8253376  | 78.4251979 |
| C | -2.6063756 | 5.6892921  | 79.5282689 |
| H | -1.9286736 | 5.8468957  | 81.5760843 |
| C | -2.3924455 | 2.6128192  | 77.2377825 |
| H | -3.1245427 | 5.1921112  | 77.4800182 |
| C | -1.6252472 | 3.2002368  | 76.0396214 |
| H | -2.0462565 | 4.1765039  | 75.7197689 |
| H | -1.6773499 | 2.5163012  | 75.1671988 |
| H | -0.5579466 | 3.3513060  | 76.2926378 |
| C | -3.8711372 | 2.3551213  | 76.8941009 |
| H | -1.9372675 | 1.6277513  | 77.4683119 |
| H | -4.3985195 | 3.2990870  | 76.6423340 |
| H | -4.4062486 | 1.8911273  | 77.7471024 |
| H | -3.9616728 | 1.6767272  | 76.0203559 |
| C | -3.0864176 | 7.1392275  | 79.5037965 |
| C | -3.5565739 | 7.6231375  | 78.1276018 |
| H | -3.7964745 | 8.7052926  | 78.1572070 |
| H | -4.4758099 | 7.0908706  | 77.8040254 |
| H | -2.7935814 | 7.4659674  | 77.3402622 |
| C | -4.1947300 | 7.3737743  | 80.5499615 |
| H | -2.2083215 | 7.7558506  | 79.8098986 |
| H | -4.4929185 | 8.4421833  | 80.5763726 |
| H | -3.8689658 | 7.0901039  | 81.5695753 |
| H | -5.0949198 | 6.7717753  | 80.3051777 |
| C | -1.0745045 | 3.3605300  | 82.1811831 |
| C | -0.0839278 | 4.3356849  | 82.8383511 |
| H | 0.3304710  | 3.8865073  | 83.7638237 |
| H | -0.5587529 | 5.2959397  | 83.1251108 |
| H | 0.7592038  | 4.5660597  | 82.1622941 |
| C | -2.2365681 | 3.0504356  | 83.1466067 |
| H | -0.5233777 | 2.4154374  | 82.0005191 |
| H | -1.8548230 | 2.6455371  | 84.1067083 |
| H | -2.9459455 | 2.3126068  | 82.7220776 |
| H | -2.8138272 | 3.9718171  | 83.3712008 |
| H | 6.6880930  | 6.2925536  | 77.2259182 |
| H | 7.7618876  | 2.0750020  | 81.2165068 |
| H | 5.4757748  | 0.7668497  | 73.7809089 |
| C | 7.4085025  | 5.5970256  | 77.7179210 |
| H | 4.9408380  | 2.2532149  | 82.6283476 |
| H | 8.2646871  | 7.2384726  | 78.8726929 |
| H | 3.5420896  | 2.3966394  | 73.7731899 |
| C | 6.6611335  | 4.2730776  | 77.8690189 |
| C | 7.0278780  | 1.2516854  | 81.0918080 |
| C | 7.8402516  | 6.2293497  | 79.0463599 |
| H | 8.6241300  | 5.6246195  | 79.5486422 |

|    |            |           |            |
|----|------------|-----------|------------|
| C  | 6.5307571  | 3.6023087 | 79.0961155 |
| C  | 5.8814885  | 1.2607292 | 74.6881844 |
| H  | 8.3228111  | 5.0453133 | 75.7838819 |
| C  | 6.0403730  | 3.6939148 | 76.7429897 |
| C  | 8.6174490  | 5.4457288 | 76.7738799 |
| H  | 9.1129013  | 6.4245415 | 76.6091490 |
| H  | 6.1162505  | 4.2116318 | 75.7744054 |
| C  | 5.0405688  | 2.7489410 | 81.6410299 |
| H  | 6.9289077  | 0.7412523 | 82.0719850 |
| H  | 7.4545943  | 0.5284114 | 80.3676598 |
| C  | 5.7818349  | 2.4155189 | 79.2296441 |
| C  | 3.9497476  | 2.9029613 | 74.6723990 |
| C  | 5.3217660  | 2.4872003 | 76.8096331 |
| H  | 6.4420758  | 0.5020342 | 75.2708606 |
| H  | 6.6120761  | 2.0292037 | 74.3590913 |
| C  | 5.6631720  | 1.7833232 | 80.6144866 |
| C  | 5.1795711  | 1.8447099 | 78.0783689 |
| C  | 4.7495618  | 1.8988677 | 75.5181874 |
| H  | 4.0296743  | 3.0683443 | 81.3222418 |
| H  | 3.1027953  | 3.3158211 | 75.2517395 |
| H  | 5.6567079  | 3.6598811 | 81.7904618 |
| H  | 6.9974414  | 6.3391720 | 79.7566849 |
| H  | 4.5667131  | 3.7547190 | 74.3211453 |
| H  | 9.3666608  | 4.7515497 | 77.2088734 |
| H  | 4.9863180  | 0.9084025 | 80.5284877 |
| H  | 4.0459651  | 1.0904866 | 75.7986088 |
| Zn | 1.7919758  | 6.0068879 | 79.8018942 |
| Br | 0.8161244  | 7.7840370 | 80.9235767 |
| H  | 6.9992292  | 4.0253981 | 79.9960550 |
| H  | -0.2195216 | 7.7754011 | 78.0201588 |

### 14s-mi; COSMO

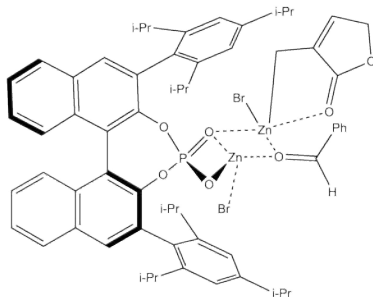

Energy (Hartree) = -11970.01662123

|    |            |            |             |
|----|------------|------------|-------------|
| Zn | 2.5891507  | 5.4135666  | 99.9783705  |
| Br | 4.1423074  | 6.7998990  | 100.9174458 |
| Zn | 1.4614266  | 5.1735833  | 96.8365884  |
| Br | -0.4751902 | 4.1294148  | 96.0326076  |
| C  | 0.1071542  | 1.0996844  | 99.5734608  |
| C  | 0.8561831  | -0.0632712 | 99.7798255  |
| C  | 0.3776384  | -1.0003427 | 100.7679850 |
| C  | 1.1481364  | -2.1234099 | 101.1945767 |
| C  | -0.9088285 | -0.7769643 | 101.3826783 |
| C  | -1.3826792 | -1.7009751 | 102.3616221 |
| C  | -1.6914925 | 0.3437715  | 100.9810385 |
| H  | -2.7149021 | 0.4484420  | 101.3733796 |
| C  | -1.2117113 | 1.2929446  | 100.0859837 |
| C  | 4.3431652  | 0.4358341  | 98.2303500  |
| C  | 4.5131003  | -0.7677684 | 97.5547144  |
| H  | 5.4562397  | -0.9523494 | 97.0173660  |
| C  | 3.4792677  | -1.7470494 | 97.4894011  |
| C  | 3.6419249  | -2.9373392 | 96.7179494  |
| C  | 2.2276665  | -1.5189597 | 98.1742980  |
| C  | 1.1758299  | -2.4673230 | 97.9976540  |
| C  | 2.0829517  | -0.3269444 | 98.9758533  |
| C  | 3.1156142  | 0.6081700  | 98.9356207  |
| O  | 0.6213838  | 2.1176897  | 98.7476848  |
| O  | 2.9855568  | 1.7777427  | 99.6836658  |

|   |            |            |             |
|---|------------|------------|-------------|
| P | 1.9163250  | 2.9348347  | 99.3004540  |
| O | 1.7165230  | 3.7370345  | 100.6118326 |
| O | 2.4175202  | 3.9136734  | 98.1978883  |
| C | -0.6144178 | -2.7906531 | 102.7439883 |
| C | 0.6653309  | -2.9945239 | 102.1616985 |
| H | -2.3707820 | -1.5253411 | 102.8151371 |
| H | -0.9888907 | -3.4922842 | 103.5048423 |
| H | 2.1439692  | -2.2861799 | 100.7588712 |
| H | 1.2826211  | -3.8471593 | 102.4833328 |
| C | 1.3612317  | -3.6052595 | 97.2240030  |
| C | 2.6084104  | -3.8534498 | 96.5909163  |
| H | 0.2021534  | -2.2836606 | 98.4725594  |
| H | 0.5316859  | -4.3173067 | 97.0962054  |
| H | 2.7461111  | -4.7631993 | 95.9869418  |
| H | 4.6043751  | -3.1053258 | 96.2096437  |
| C | -2.1464139 | 3.6651090  | 100.0825250 |
| C | -2.0837590 | 2.3681691  | 99.5116228  |
| C | -2.9338452 | 4.6423045  | 99.4454841  |
| C | -2.8328801 | 2.0551209  | 98.3425085  |
| C | -3.6109640 | 3.0666035  | 97.7528949  |
| C | -3.6624903 | 4.3696845  | 98.2751674  |
| H | -2.9806471 | 5.6585522  | 99.8679275  |
| C | -2.7687443 | 0.6704879  | 97.6949202  |
| H | -4.1768149 | 2.8317919  | 96.8390124  |
| C | -1.7596368 | 0.6438314  | 96.5304394  |
| H | -2.0906239 | 1.3092968  | 95.7063770  |
| H | -1.6560597 | -0.3853510 | 96.1270480  |
| H | -0.7596853 | 1.0003285  | 96.8442591  |
| C | -4.1454902 | 0.1529948  | 97.2468087  |
| H | -2.3971446 | -0.0374613 | 98.4639217  |
| H | -4.5597378 | 0.7463785  | 96.4052762  |
| H | -4.8817873 | 0.1814839  | 98.0757640  |
| H | -4.0646007 | -0.8955736 | 96.8937398  |
| C | -4.5045158 | 5.4568625  | 97.6188493  |
| C | -4.3215051 | 5.5118222  | 96.0929487  |
| H | -4.8320909 | 6.4013283  | 95.6682567  |
| H | -4.7603264 | 4.6209952  | 95.5972533  |
| H | -3.2483744 | 5.5453870  | 95.8146766  |
| C | -5.9900061 | 5.3060603  | 97.9983685  |
| H | -4.1501735 | 6.4257741  | 98.0363154  |
| H | -6.6000212 | 6.1235815  | 97.5599707  |
| H | -6.1290865 | 5.3226542  | 99.0982866  |
| H | -6.3940617 | 4.3421537  | 97.6233506  |
| C | -1.4259762 | 3.9782044  | 101.3910538 |
| C | -0.8881024 | 5.4145491  | 101.4656454 |
| H | -0.2190073 | 5.5313155  | 102.3423905 |
| H | -1.7012207 | 6.1630915  | 101.5694183 |
| H | -0.3125221 | 5.6644038  | 100.5544502 |
| C | -2.3368842 | 3.6708575  | 102.5956955 |
| H | -0.5476669 | 3.3036304  | 101.4540820 |
| H | -1.8070704 | 3.8652527  | 103.5514601 |
| H | -2.6647373 | 2.6122929  | 102.5973713 |
| H | -3.2480192 | 4.3051871  | 102.5717934 |
| H | 7.7805804  | 5.5336082  | 97.1256991  |
| H | 7.9870424  | 1.1844361  | 101.2067641 |
| H | 5.2934346  | 1.1766879  | 93.6514779  |
| C | 8.0090513  | 5.0047230  | 98.0749367  |
| H | 5.2265138  | 1.5833118  | 102.7752095 |
| H | 8.4139602  | 6.8962767  | 99.0920648  |
| H | 3.4153671  | 2.7826029  | 94.2272573  |
| C | 7.0728623  | 3.8047351  | 98.1294046  |
| C | 7.1416713  | 0.4798743  | 101.0602316 |
| C | 7.7667589  | 6.0034421  | 99.2171061  |
| H | 8.0025934  | 5.5635591  | 100.2091339 |
| C | 6.8579903  | 3.0846499  | 99.3176274  |
| C | 5.8250564  | 1.4887166  | 94.5743226  |
| H | 9.6636922  | 3.8611653  | 97.1772634  |
| C | 6.4111288  | 3.3654650  | 96.9723957  |
| C | 9.4784800  | 4.5437504  | 98.0316124  |
| H | 10.1647097 | 5.4111370  | 97.9350006  |
| H | 6.5536291  | 3.9367871  | 96.0431050  |

|   |            |            |             |
|---|------------|------------|-------------|
| C | 5.4024759  | 2.1639991  | 101.8461658 |
| H | 7.0170835  | -0.0987040 | 101.9992702 |
| H | 7.4299727  | -0.2267100 | 100.2555001 |
| C | 5.9991373  | 1.9737972  | 99.3757332  |
| C | 3.9089998  | 3.0488689  | 95.1846345  |
| C | 5.5375326  | 2.2627660  | 96.9706344  |
| H | 6.4577500  | 0.6415584  | 94.9104489  |
| H | 6.5029841  | 2.3250803  | 94.3043397  |
| C | 5.8455512  | 1.2326093  | 100.7032872 |
| C | 5.3299864  | 1.5572083  | 98.1897654  |
| C | 4.8226275  | 1.9062705  | 95.6658432  |
| H | 4.4638186  | 2.6937612  | 101.5909879 |
| H | 3.1165980  | 3.2465950  | 95.9327005  |
| H | 6.1734952  | 2.9287188  | 102.0746299 |
| H | 6.7141400  | 6.3464349  | 99.2356028  |
| H | 4.4705638  | 3.9942081  | 95.0418171  |
| H | 9.7505269  | 3.9989335  | 98.9607730  |
| H | 5.0549267  | 0.4646755  | 100.5782091 |
| H | 4.1682320  | 1.0328424  | 95.8574403  |
| H | 7.3731419  | 3.4023631  | 100.2376889 |
| C | -2.2121933 | 9.7720337  | 97.2555408  |
| C | 1.0588138  | 7.6334559  | 98.9336765  |
| C | -2.0685888 | 8.3995095  | 96.9780358  |
| C | -0.2186375 | 9.7240924  | 98.6378941  |
| C | -0.0627711 | 8.3415117  | 98.3553173  |
| C | -1.2904682 | 10.4334072 | 98.0909274  |
| C | -1.0057381 | 7.6768796  | 97.5289245  |
| O | 1.2423022  | 6.3831872  | 98.7686808  |
| H | -3.0538110 | 10.3321086 | 96.8198269  |
| H | 0.5130353  | 10.2312399 | 99.2868709  |
| H | -2.7943866 | 7.8884478  | 96.3292341  |
| H | -1.4134429 | 11.5043981 | 98.3103106  |
| H | -0.9044036 | 6.5978230  | 97.3281930  |
| H | 1.7305816  | 8.1765333  | 99.6349900  |
| C | 3.0169462  | 8.7513547  | 97.2367991  |
| C | 3.2251013  | 7.5483597  | 96.6087207  |
| C | 4.6458286  | 7.1563619  | 96.8963370  |
| O | 5.2212170  | 8.1191319  | 97.6829727  |
| C | 4.2720986  | 9.1595806  | 97.9493701  |
| O | 5.2600563  | 6.1882548  | 96.4947652  |
| C | 2.3764108  | 6.6875719  | 95.8133165  |
| H | 2.1468851  | 9.4101628  | 97.1271349  |
| H | 4.6857950  | 10.1238086 | 97.5772537  |
| H | 4.1535711  | 9.2434918  | 99.0535706  |
| H | 2.9568511  | 6.1038635  | 95.0704209  |
| H | 1.5196743  | 7.2052690  | 95.3416210  |

### 14s-mi

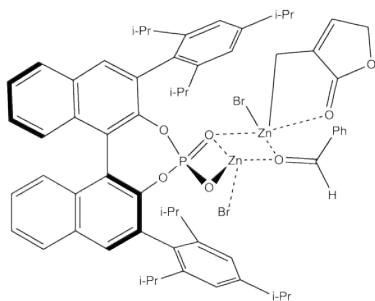

Energy (Hartree) = -11970.0046349

|    |            |            |             |
|----|------------|------------|-------------|
| Zn | 2.6035190  | 5.4174590  | 99.9614757  |
| Br | 4.0865974  | 6.8588957  | 100.9263490 |
| Zn | 1.4359426  | 5.1554549  | 96.8331413  |
| Br | -0.5210341 | 4.1668163  | 96.0326724  |
| C  | 0.1122898  | 1.1029389  | 99.5604344  |
| C  | 0.8590958  | -0.0615153 | 99.7672299  |
| C  | 0.3793187  | -0.9968260 | 100.7563277 |
| C  | 1.1470403  | -2.1218089 | 101.1821854 |
| C  | -0.9055961 | -0.7701496 | 101.3726241 |
| C  | -1.3798798 | -1.6929009 | 102.3518866 |

|   |            |            |             |
|---|------------|------------|-------------|
| C | -1.6850754 | 0.3526678  | 100.9718427 |
| H | -2.7076202 | 0.4620511  | 101.3652664 |
| C | -1.2049874 | 1.3002022  | 100.0754588 |
| C | 4.3507083  | 0.4331946  | 98.2264267  |
| C | 4.5203577  | -0.7704872 | 97.5513661  |
| H | 5.4649105  | -0.9545789 | 97.0164960  |
| C | 3.4860945  | -1.7487940 | 97.4832886  |
| C | 3.6489556  | -2.9394475 | 96.7133302  |
| C | 2.2333259  | -1.5198895 | 98.1654667  |
| C | 1.1821475  | -2.4685051 | 97.9883654  |
| C | 2.0870712  | -0.3271015 | 98.9654439  |
| C | 3.1208136  | 0.6069347  | 98.9272901  |
| O | 0.6266712  | 2.1182333  | 98.7331359  |
| O | 2.9894571  | 1.7778011  | 99.6721883  |
| P | 1.9247221  | 2.9353341  | 99.2799342  |
| O | 1.7261297  | 3.7468065  | 100.5851341 |
| O | 2.4255170  | 3.9027129  | 98.1673771  |
| C | -0.6147302 | -2.7844489 | 102.7331489 |
| C | 0.6631094  | -2.9916250 | 102.1492509 |
| H | -2.3666963 | -1.5141998 | 102.8069987 |
| H | -0.9902313 | -3.4848032 | 103.4946049 |
| H | 2.1414529  | -2.2863821 | 100.7442358 |
| H | 1.2785839  | -3.8459296 | 102.4697702 |
| C | 1.3688938  | -3.6071306 | 97.2168190  |
| C | 2.6162945  | -3.8556321 | 96.5856632  |
| H | 0.2083526  | -2.2834968 | 98.4623430  |
| H | 0.5396947  | -4.3195286 | 97.0890855  |
| H | 2.7550971  | -4.7657555 | 95.9825937  |
| H | 4.6120701  | -3.1075494 | 96.2063482  |
| C | -2.1361377 | 3.6736717  | 100.0771213 |
| C | -2.0778174 | 2.3771564  | 99.5054246  |
| C | -2.9325208 | 4.6492417  | 99.4492800  |
| C | -2.8366244 | 2.0641543  | 98.3426380  |
| C | -3.6229516 | 3.0742553  | 97.7625509  |
| C | -3.6733179 | 4.3759790  | 98.2874238  |
| H | -2.9771697 | 5.6650064  | 99.8731234  |
| H | -2.7721788 | 0.6818369  | 97.6903650  |
| H | -4.1970085 | 2.8392489  | 96.8539201  |
| C | -1.7653922 | 0.6609789  | 96.5237097  |
| H | -2.0975705 | 1.3294634  | 95.7028249  |
| H | -1.6610135 | -0.3660985 | 96.1153748  |
| H | -0.7648381 | 1.0171289  | 96.8354026  |
| C | -4.1488306 | 0.1633523  | 97.2436135  |
| H | -2.3983007 | -0.0279320 | 98.4567262  |
| H | -4.5641568 | 0.7555260  | 96.4018508  |
| H | -4.8851762 | 0.1916334  | 98.0723437  |
| H | -4.0680164 | -0.8849211 | 96.8898886  |
| C | -4.5264887 | 5.4609458  | 97.6420500  |
| C | -4.3484834 | 5.5286423  | 96.1159912  |
| H | -4.8690165 | 6.4158247  | 95.6980551  |
| H | -4.7813814 | 4.6380335  | 95.6149918  |
| H | -3.2769317 | 5.5713545  | 95.8330592  |
| C | -6.0091259 | 5.2955032  | 98.0256763  |
| H | -4.1780801 | 6.4296352  | 98.0655509  |
| H | -6.6285967 | 6.1103194  | 97.5955332  |
| H | -6.1441328 | 5.3021017  | 99.1259861  |
| H | -6.4064835 | 4.3307899  | 97.6461773  |
| C | -1.4007624 | 3.9898896  | 101.3765372 |
| C | -0.8608158 | 5.4263051  | 101.4392628 |
| H | -0.1760669 | 5.5437660  | 102.3037044 |
| H | -1.6713467 | 6.1757460  | 101.5569113 |
| H | -0.3016719 | 5.6745280  | 100.5171875 |
| C | -2.2975461 | 3.6876233  | 102.5926506 |
| H | -0.5215665 | 3.3160839  | 101.4326856 |
| H | -1.7577315 | 3.8870579  | 103.5416639 |
| H | -2.6230453 | 2.6285381  | 102.6031196 |
| H | -3.2104900 | 4.3193612  | 102.5758830 |
| H | 7.8003544  | 5.5279264  | 97.1443840  |
| H | 7.9874765  | 1.1678449  | 101.2122237 |
| H | 5.3084813  | 1.1210144  | 93.6762064  |
| C | 8.0129830  | 5.0043503  | 98.1003113  |

|   |            |            |             |
|---|------------|------------|-------------|
| H | 5.222571   | 1.5600639  | 102.7774186 |
| H | 8.3892263  | 6.9023708  | 99.1171465  |
| H | 3.4589259  | 2.7927332  | 94.2095102  |
| C | 7.0815863  | 3.8003911  | 98.1443251  |
| C | 7.1421647  | 0.4642872  | 101.0616641 |
| C | 7.7435744  | 6.0073740  | 99.2327426  |
| H | 7.9603689  | 5.5736428  | 100.2317138 |
| C | 6.8623502  | 3.0766286  | 99.3292985  |
| C | 5.8363153  | 1.4234878  | 94.6044223  |
| H | 9.6894462  | 3.8634931  | 97.2405996  |
| C | 6.4252904  | 3.3638401  | 96.9835212  |
| C | 9.4849710  | 4.5503265  | 98.0868832  |
| H | 10.1689524 | 5.4202435  | 97.9985330  |
| H | 6.5718149  | 3.9380067  | 96.0566271  |
| C | 5.3999168  | 2.1442972  | 101.8509411 |
| H | 7.0166793  | -0.1182981 | 101.9980814 |
| H | 7.4326507  | -0.2381297 | 100.2543390 |
| C | 6.0045089  | 1.9651623  | 99.3811934  |
| C | 3.9804096  | 3.0761983  | 95.1468499  |
| C | 5.5497613  | 2.2632300  | 96.9763029  |
| H | 6.4227251  | 0.5540793  | 94.9662745  |
| H | 6.5588974  | 2.2219214  | 94.3358670  |
| C | 5.8469658  | 1.2185610  | 100.7052063 |
| C | 5.3391034  | 1.5532085  | 98.1918745  |
| C | 4.8368620  | 1.9090346  | 95.6701134  |
| H | 4.4607901  | 2.6735571  | 101.5969239 |
| H | 3.2135279  | 3.3532756  | 95.8957505  |
| H | 6.1688210  | 2.9093155  | 102.0850335 |
| H | 6.6901974  | 6.3479795  | 99.2286479  |
| H | 4.5885312  | 3.9821469  | 94.9506881  |
| H | 9.7428863  | 4.0116967  | 99.0234698  |
| H | 5.0567591  | 0.4509806  | 100.5742640 |
| H | 4.1418952  | 1.0698427  | 95.8731336  |
| H | 7.3734408  | 3.3927454  | 100.2521651 |
| C | -2.2311667 | 9.7785022  | 97.3152259  |
| C | 1.0995003  | 7.6375379  | 98.8827866  |
| C | -2.0869023 | 8.4106207  | 97.0209873  |
| C | -0.1976906 | 9.7274367  | 98.6378557  |
| C | -0.0410824 | 8.3490530  | 98.3387430  |
| C | -1.2887836 | 10.4360979 | 98.1299756  |
| C | -1.0040915 | 7.6885613  | 97.5342662  |
| O | 1.2629708  | 6.3816130  | 98.7256806  |
| H | -3.0882454 | 10.3382693 | 96.9102227  |
| H | 0.5495407  | 10.2326229 | 99.2708777  |
| H | -2.8265205 | 7.8980052  | 96.3891837  |
| H | -1.4112681 | 11.5040203 | 98.3647223  |
| H | -0.9039500 | 6.6120799  | 97.3182495  |
| H | 1.7820268  | 8.1701610  | 99.5814713  |
| C | 2.9519057  | 8.7324230  | 97.1864098  |
| C | 3.1897900  | 7.5229933  | 96.5751659  |
| C | 4.6019002  | 7.1374595  | 96.9216399  |
| O | 5.1503967  | 8.1232981  | 97.6992276  |
| C | 4.1921486  | 9.1628180  | 97.9171128  |
| O | 5.2228874  | 6.1567195  | 96.5706853  |
| C | 2.3757531  | 6.6455025  | 95.7737018  |
| H | 2.0898852  | 9.3905056  | 97.0231597  |
| H | 4.6088938  | 10.1200944 | 97.5287811  |
| H | 4.0527241  | 9.2742283  | 99.0168230  |
| H | 2.9787736  | 6.0267510  | 95.0796262  |
| H | 1.5229974  | 7.1334918  | 95.2660675  |

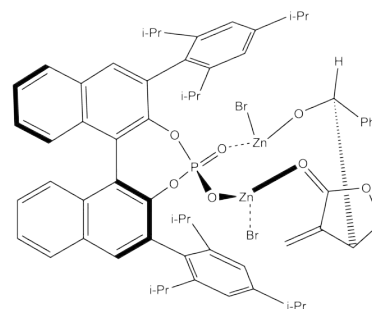

Energy (Hartree) = -11970.03645194

|    |             |            |             |
|----|-------------|------------|-------------|
| Zn | -4.3002833  | 8.2016430  | 719.4406272 |
| Br | -2.7136973  | 8.5701692  | 721.0346776 |
| C  | -7.7531924  | 8.4125238  | 711.0420015 |
| C  | -6.7016991  | 8.2871174  | 711.9628379 |
| C  | -6.9722407  | 8.0992959  | 713.3321823 |
| C  | -8.3115153  | 8.0178705  | 713.7584202 |
| C  | -9.3665603  | 8.1417767  | 712.8387920 |
| C  | -9.0893484  | 8.3446540  | 711.4771559 |
| H  | -7.5308021  | 8.5567438  | 709.9730248 |
| H  | -5.6523007  | 8.3093788  | 711.6310616 |
| C  | -5.8263212  | 7.9938532  | 714.3329280 |
| H  | -8.5293157  | 7.8285997  | 714.8220096 |
| H  | -10.4092586 | 8.0682660  | 713.1872083 |
| H  | -9.9128767  | 8.4380496  | 710.7524457 |
| O  | -4.7298149  | 7.3167770  | 713.8200731 |
| C  | -5.3186225  | 9.4299671  | 714.7653491 |
| C  | -4.4757904  | 9.2969667  | 716.0054304 |
| C  | -5.3084738  | 9.7547673  | 717.1305337 |
| O  | -6.4079377  | 10.3552046 | 716.6915864 |
| C  | -6.3954315  | 10.4224460 | 715.2277201 |
| O  | -5.1136422  | 9.6642930  | 718.3617849 |
| C  | -3.2431594  | 8.7669191  | 716.1528675 |
| H  | -6.1577535  | 11.4697704 | 714.9558103 |
| H  | -7.4198785  | 10.1833065 | 714.8896091 |
| Zn | -4.4344826  | 5.5560758  | 714.3974021 |
| Br | -4.5985846  | 3.3564622  | 713.7392477 |
| C  | -6.5418790  | 3.7396569  | 718.0338957 |
| C  | -5.8491357  | 2.5510829  | 718.2963196 |
| C  | -6.4445549  | 1.6150364  | 719.2196842 |
| C  | -5.7637479  | 0.4480088  | 719.6825602 |
| C  | -7.7691114  | 1.8776663  | 719.7304401 |
| C  | -8.3739267  | 0.9406283  | 720.6216226 |
| C  | -8.4391119  | 3.0786277  | 719.3615343 |
| H  | -9.4576160  | 3.2579337  | 719.7391150 |
| C  | -7.8375998  | 4.0348758  | 718.5517982 |
| C  | -2.1629791  | 3.0975449  | 717.3678072 |
| C  | -1.8616472  | 1.9046902  | 716.7213551 |
| H  | -0.8354112  | 1.7247550  | 716.3683557 |
| C  | -2.8569980  | 0.9200931  | 716.4532984 |
| C  | -2.5456851  | -0.2513757 | 715.7003416 |
| C  | -4.2119334  | 1.1216852  | 716.9086225 |
| C  | -5.2037593  | 0.1673242  | 716.5362437 |
| C  | -4.5140467  | 2.2999813  | 717.6812553 |
| C  | -3.5031656  | 3.2478181  | 717.8394210 |
| O  | -5.9871247  | 4.6885989  | 717.1759824 |
| O  | -3.8160790  | 4.4343423  | 718.5133374 |
| P  | -4.6420343  | 5.5203427  | 717.6139229 |
| O  | -5.0125866  | 6.6545543  | 718.5807158 |
| O  | -3.9338192  | 5.8950705  | 716.3178967 |
| C  | -7.6945226  | -0.1977120 | 721.0279777 |
| C  | -6.3727771  | -0.4346023 | 720.5638666 |
| H  | -9.3899282  | 1.1492724  | 720.9921564 |
| H  | -8.1694782  | -0.9095179 | 721.7202143 |
| H  | -4.7378033  | 0.2546222  | 719.3404665 |
| H  | -5.8232970  | -1.3235162 | 720.9096165 |

## 7.1.4 Product Complexes 15

### 15a-mi; COSMO



|   |             |            |             |
|---|-------------|------------|-------------|
| C | -4.8710631  | -0.9523042 | 715.7861378 |
| C | -3.5294008  | -1.1734241 | 715.3752849 |
| H | -6.2472574  | 0.3350388  | 716.8377098 |
| H | -5.6552229  | -1.6702735 | 715.5010689 |
| H | -3.2767468  | -2.0675576 | 714.7851741 |
| H | -1.5073565  | -0.3991917 | 715.3641823 |
| C | -8.4719193  | 6.4374742  | 719.0615911 |
| C | -8.5390960  | 5.3108328  | 718.1934459 |
| C | -9.2182321  | 7.5825687  | 718.7337440 |
| C | -9.2999736  | 5.3735523  | 716.9971217 |
| C | -10.0279372 | 6.5481974  | 716.7149930 |
| C | -10.0178148 | 7.6580994  | 717.5762902 |
| H | -9.1945675  | 8.4524778  | 719.4098171 |
| C | -9.3269400  | 4.2062862  | 716.0107538 |
| H | -10.6345246 | 6.5800788  | 715.7979273 |
| C | -8.4560262  | 4.4994773  | 714.7733723 |
| H | -8.8697930  | 5.3380677  | 714.1767374 |
| H | -8.3964443  | 3.6094910  | 714.1141176 |
| H | -7.4197272  | 4.7635321  | 715.0613776 |
| C | -10.7551637 | 3.8046658  | 715.6056327 |
| H | -8.8787631  | 3.3315075  | 716.5253598 |
| H | -11.2595230 | 4.6028532  | 715.0217669 |
| H | -11.3832400 | 3.5864601  | 716.4932844 |
| H | -10.7342692 | 2.8980713  | 714.9668037 |
| C | -10.8156229 | 8.9314928  | 717.3020063 |
| C | -9.9186474  | 10.0371366 | 716.7104443 |
| H | -10.4673603 | 10.9995415 | 716.6471357 |
| H | -9.5983570  | 9.7669792  | 715.6827201 |
| H | -9.0052036  | 10.1970827 | 717.3166699 |
| C | -12.0571194 | 8.7133702  | 716.4271292 |
| H | -11.1652981 | 9.2929561  | 718.2952084 |
| H | -12.6576995 | 9.6434820  | 716.3686394 |
| H | -12.7063870 | 7.9078178  | 716.8253794 |
| H | -11.7810442 | 8.4422781  | 715.3861059 |
| C | -7.6336492  | 6.4056857  | 720.3405335 |
| C | -6.9949059  | 7.7653466  | 720.6815544 |
| H | -6.1497355  | 7.6333741  | 721.3912986 |
| H | -7.7070137  | 8.4595280  | 721.1739879 |
| H | -6.6538337  | 8.2920356  | 719.7649766 |
| C | -8.4478223  | 5.8937670  | 721.5443650 |
| H | -6.8051478  | 5.6901911  | 720.1635714 |
| H | -7.8220172  | 5.8699050  | 722.4605894 |
| H | -8.8325363  | 4.8704572  | 721.3707351 |
| H | -9.3174538  | 6.5556832  | 721.7388425 |
| H | 1.8807538   | 7.9296303  | 717.2972974 |
| H | 0.7829158   | 3.8642100  | 721.0091233 |
| H | -0.1932985  | 3.4195135  | 713.3453471 |
| C | 1.1121377   | 7.9007921  | 718.1026920 |
| H | -2.2595889  | 4.0207555  | 722.0140776 |
| H | 0.7058631   | 10.0580357 | 717.9472418 |
| C | 0.3546992   | 6.5867391  | 717.9352519 |
| C | 0.0263331   | 3.1275219  | 720.6663021 |
| C | 0.1612348   | 9.0939758  | 717.8719815 |
| H | -0.6471833  | 9.0975067  | 718.6340668 |
| C | -0.0781414  | 5.8171142  | 719.0266371 |
| C | 0.0807471   | 3.7805314  | 714.3582840 |
| H | 2.5002167   | 7.1769423  | 719.6507199 |
| C | 0.0213695   | 6.1344939  | 716.6445320 |
| C | 1.8364800   | 8.0415810  | 719.4474879 |
| H | 2.4570061   | 8.9603581  | 719.4574870 |
| H | 0.3713971   | 6.7176673  | 715.7770247 |
| C | -1.9324494  | 4.6700515  | 721.1758988 |
| H | -0.2428239  | 2.4901472  | 721.5342313 |
| H | 0.5065575   | 2.4837150  | 719.9014989 |
| C | -0.8464264  | 4.6493462  | 718.8616457 |
| C | -1.4754602  | 5.7412112  | 714.0768712 |
| C | -0.7556138  | 4.9840931  | 716.4221962 |
| H | 0.3638842   | 2.9010441  | 714.9695599 |
| H | 0.9828942   | 4.4211193  | 714.2633498 |
| C | -1.2201207  | 3.8348412  | 720.0993367 |
| C | -1.2084606  | 4.2362911  | 717.5502350 |

|   |            |           |             |
|---|------------|-----------|-------------|
| C | -1.0834296 | 4.5672872 | 714.9900723 |
| H | -2.8247008 | 5.1770009 | 720.7612202 |
| H | -1.2706021 | 5.4523150 | 721.6012143 |
| H | -0.3098234 | 9.0478803 | 716.8695592 |
| H | 1.1170359  | 8.1251394 | 720.2887017 |
| H | -1.9226787 | 3.0373801 | 719.7827069 |
| H | -1.9618406 | 3.8911459 | 715.0318989 |
| H | 0.1801835  | 6.1334119 | 720.0472796 |
| H | -0.6103254 | 6.3821373 | 713.8068734 |
| H | -2.2158113 | 6.4122003 | 714.5609819 |
| H | -1.9002960 | 5.3610798 | 713.1243727 |
| H | -4.7522335 | 9.8200014 | 713.8971125 |
| H | -6.2509187 | 7.5263895 | 715.2639259 |
| H | -2.7718930 | 8.6635885 | 717.1437122 |
| H | -2.6634732 | 8.4351168 | 715.2816282 |

### 15a-mi

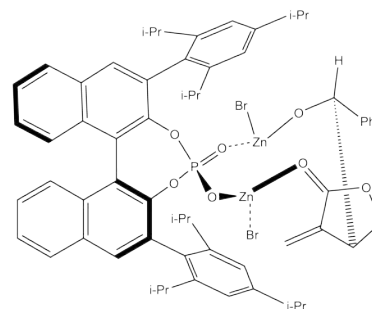

Energy (Hartree) = -11970.02502338

|    |             |            |             |
|----|-------------|------------|-------------|
| Zn | -4.1760991  | 8.2016176  | 719.4243092 |
| Br | -2.6369057  | 8.6050347  | 721.0457316 |
| C  | -7.7737504  | 8.3259806  | 711.0621498 |
| C  | -6.7238413  | 8.2068119  | 711.9848628 |
| C  | -6.9966376  | 8.0635956  | 713.3586834 |
| C  | -8.3365121  | 8.0163256  | 713.7880502 |
| C  | -9.3895181  | 8.1345315  | 712.8657907 |
| C  | -9.1098867  | 8.2956102  | 711.4995416 |
| H  | -7.5502072  | 8.4338383  | 709.9892261 |
| H  | -5.6735369  | 8.1949872  | 711.6558087 |
| C  | -5.8494726  | 7.9667892  | 714.3593563 |
| H  | -8.5569550  | 7.8539434  | 714.8554868 |
| H  | -10.4327122 | 8.0870654  | 713.2171615 |
| H  | -9.9321118  | 8.3833133  | 710.7727650 |
| O  | -4.7509734  | 7.2950324  | 713.8513985 |
| C  | -5.3480978  | 9.4109511  | 714.7780003 |
| C  | -4.4712547  | 9.2880403  | 715.9940452 |
| C  | -5.2755450  | 9.7392664  | 717.1419342 |
| O  | -6.3956305  | 10.3268867 | 716.7318328 |
| C  | -6.4247846  | 10.3890614 | 715.2700468 |
| O  | -5.0435819  | 9.6536752  | 718.3656783 |
| C  | -3.2348910  | 8.7570413  | 716.1041481 |
| H  | -6.2114128  | 11.4396429 | 714.9873401 |
| H  | -7.4541137  | 10.1340109 | 714.9593674 |
| Zn | -4.4483999  | 5.5318310  | 714.4212154 |
| Br | -4.5647270  | 3.3392935  | 713.7559376 |
| C  | -6.5325909  | 3.7603073  | 718.0348782 |
| C  | -5.8468343  | 2.5653687  | 718.2894334 |
| C  | -6.4538972  | 1.6221716  | 719.1979867 |
| C  | -5.7806844  | 0.4488213  | 719.6552674 |
| C  | -7.7823939  | 1.8824289  | 719.6987199 |
| C  | -8.3971384  | 0.9381436  | 720.5745560 |
| C  | -8.4457878  | 3.0874906  | 719.3333575 |
| H  | -9.4686235  | 3.2662976  | 719.6994992 |
| C  | -7.8344497  | 4.0508587  | 718.5397847 |
| C  | -2.1532183  | 3.0956034  | 717.3771155 |
| C  | -1.8575693  | 1.9042887  | 716.7256005 |

|   |             |            |             |   |            |           |             |
|---|-------------|------------|-------------|---|------------|-----------|-------------|
| H | -0.8318159  | 1.7223864  | 716.3724480 | H | -0.6507636 | 9.1161134 | 718.5927046 |
| C | -2.8571832  | 0.9266255  | 716.4495005 | C | -0.0817027 | 5.8264674 | 719.0336324 |
| C | -2.5508106  | -0.2415491 | 715.6903194 | C | 0.1126390  | 3.7660629 | 714.3761698 |
| C | -4.2127365  | 1.1340430  | 716.8999720 | H | 2.4718163  | 7.2027743 | 719.6856206 |
| C | -5.2089083  | 0.1893979  | 716.5158658 | C | 0.0336726  | 6.1286298 | 716.6512095 |
| C | -4.5101992  | 2.3092318  | 717.6794498 | C | 1.8121604  | 8.0646726 | 719.4596721 |
| C | -3.4933735  | 3.2483298  | 717.8479802 | H | 2.4330878  | 8.9831159 | 719.4693210 |
| O | -5.9690400  | 4.7203036  | 717.1956525 | H | 0.3894360  | 6.7060936 | 715.7821800 |
| O | -3.8012316  | 4.4314114  | 718.5300875 | C | -1.9294403 | 4.6805338 | 721.1864032 |
| P | -4.6099235  | 5.5301073  | 717.6323381 | H | -0.2374972 | 2.5024749 | 721.5467597 |
| O | -4.9595175  | 6.6693085  | 718.6035747 | H | 0.5090419  | 2.4935044 | 719.9127168 |
| O | -3.9023332  | 5.8972552  | 716.3338644 | C | -0.8440714 | 4.6547994 | 718.8705332 |
| C | -7.7248111  | -0.2054948 | 720.9757142 | C | -1.4476041 | 5.7208314 | 714.0768458 |
| C | -6.4000058  | -0.4408237 | 720.5214361 | C | -0.7391903 | 4.9756220 | 716.4299307 |
| H | -9.4159575  | 1.1458236  | 720.9377963 | H | 0.3967578  | 2.8917280 | 714.9942594 |
| H | -8.2080418  | -0.9228010 | 721.6563569 | H | 1.0137785  | 4.4081723 | 714.2826046 |
| H | -4.7524035  | 0.2568810  | 719.3198315 | C | -1.2180912 | 3.8439007 | 720.1104811 |
| H | -5.8558198  | -1.3345596 | 720.8628959 | C | -1.1975358 | 4.2332779 | 717.5594534 |
| C | -4.8800330  | -0.9269466 | 715.7600363 | C | -1.0573574 | 4.5521953 | 714.9975261 |
| C | -3.5385714  | -1.1544643 | 715.3544370 | H | -2.8235269 | 5.1852611 | 720.7733194 |
| H | -6.2525319  | 0.3633852  | 716.8126647 | H | -1.2692572 | 5.4646237 | 721.6105835 |
| H | -5.6679644  | -1.6366351 | 715.4652188 | H | -0.2891762 | 9.0377725 | 716.8330343 |
| H | -3.2890947  | -2.0455458 | 714.7585745 | H | 1.0775484  | 8.1599185 | 720.2861944 |
| H | -1.5122993  | -0.3930260 | 715.3565904 | H | -1.9204087 | 3.0453918 | 719.7958443 |
| C | -8.4652125  | 6.4529034  | 719.0534690 | H | -1.9351338 | 3.8750701 | 715.0349300 |
| C | -8.5364027  | 5.3275321  | 718.1845132 | H | 0.1684574  | 6.1497073 | 720.0539513 |
| C | -9.2162422  | 7.5963848  | 718.7319105 | H | -0.5825255 | 6.3628905 | 713.8087216 |
| C | -9.3074438  | 5.3886406  | 716.9942625 | H | -2.1949024 | 6.3886980 | 714.5536851 |
| C | -10.0412373 | 6.5613166  | 716.7202181 | H | -1.8681417 | 5.3344671 | 713.1252587 |
| C | -10.0263570 | 7.6702133  | 717.5824273 | H | -4.8103887 | 9.8036999 | 713.8927486 |
| H | -9.1889982  | 8.4654045  | 719.4088010 | H | -6.2716541 | 7.5074343 | 715.2960513 |
| C | -9.3338810  | 4.2225682  | 716.0060690 | H | -2.7327871 | 8.6509926 | 717.0793756 |
| H | -10.6563383 | 6.5920431  | 715.8091197 | H | -2.6872023 | 8.4208634 | 715.2141571 |
| C | -8.4121346  | 4.4914536  | 714.7997221 |   |            |           |             |
| H | -8.7829157  | 5.3403914  | 714.1898842 |   |            |           |             |
| H | -8.3519188  | 3.6008230  | 714.1416976 |   |            |           |             |
| H | -7.3795901  | 4.7280231  | 715.1221592 |   |            |           |             |
| C | -10.7555856 | 3.8586274  | 715.5474661 |   |            |           |             |
| H | -8.9281032  | 3.3363065  | 716.5363371 |   |            |           |             |
| H | -11.2113246 | 4.6625368  | 714.9324237 |   |            |           |             |
| H | -11.4269627 | 3.6701081  | 716.4097042 |   |            |           |             |
| H | -10.7354073 | 2.9445741  | 714.9196416 |   |            |           |             |
| C | -10.8321190 | 8.9409504  | 717.3186624 |   |            |           |             |
| C | -9.9479281  | 10.0521184 | 716.7181781 |   |            |           |             |
| H | -10.4990072 | 11.0140653 | 716.6692663 |   |            |           |             |
| H | -9.6458512  | 9.7882849  | 715.6833070 |   |            |           |             |
| H | -9.0246734  | 10.2105492 | 717.3099941 |   |            |           |             |
| C | -12.0834015 | 8.7185594  | 716.4591305 |   |            |           |             |
| H | -11.1719624 | 9.2991391  | 718.3165660 |   |            |           |             |
| H | -12.6894634 | 9.6455361  | 716.4080118 |   |            |           |             |
| H | -12.7237310 | 7.9096137  | 716.8643944 |   |            |           |             |
| H | -11.8186291 | 8.4492754  | 715.4147855 |   |            |           |             |
| C | -7.6223246  | 6.4200776  | 720.3293631 |   |            |           |             |
| C | -6.9953938  | 7.7828694  | 720.6783889 |   |            |           |             |
| H | -6.1524278  | 7.6537532  | 721.3909051 |   |            |           |             |
| H | -7.7173959  | 8.4674369  | 721.1702407 |   |            |           |             |
| H | -6.6429335  | 8.3121765  | 719.7692664 |   |            |           |             |
| C | -8.4286933  | 5.8893105  | 721.5302198 |   |            |           |             |
| H | -6.7871981  | 5.7141385  | 720.1447310 |   |            |           |             |
| H | -7.8021950  | 5.8670881  | 722.4459854 |   |            |           |             |
| H | -8.8000502  | 4.8621807  | 721.3509294 |   |            |           |             |
| H | -9.3067021  | 6.5383714  | 721.7301263 |   |            |           |             |
| H | 1.8949755   | 7.9229253  | 717.3125166 |   |            |           |             |
| H | 0.7865368   | 3.8754821  | 721.0166047 |   |            |           |             |
| H | -0.1550133  | 3.3975657  | 713.3643360 |   |            |           |             |
| C | 1.1117486   | 7.9063303  | 718.1043689 |   |            |           |             |
| H | -2.2552167  | 4.0329587  | 722.0262672 |   |            |           |             |
| H | 0.7125515   | 10.0623020 | 717.9097545 |   |            |           |             |
| C | 0.3565301   | 6.5903777  | 717.9407976 |   |            |           |             |
| C | 0.0294257   | 3.1380963  | 720.6769320 |   |            |           |             |
| C | 0.1674309   | 9.0980340  | 717.8414278 |   |            |           |             |

### 15b-ma; COSMO

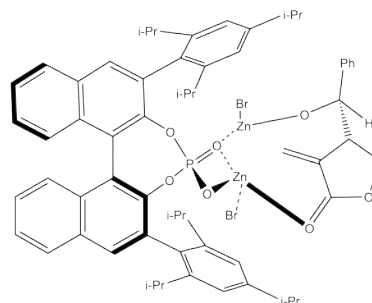

Energy (Hartree) = -11970.0376757

|   |            |            |            |
|---|------------|------------|------------|
| C | 0.2142212  | 1.1362329  | 89.2158480 |
| C | 1.1057508  | 0.0970594  | 89.4943511 |
| C | 0.8451192  | -0.7072197 | 90.6661056 |
| C | 1.7750532  | -1.6726463 | 91.1572244 |
| C | -0.3848794 | -0.5100192 | 91.3960050 |
| C | -0.6526785 | -1.3163571 | 92.5428795 |
| C | -1.3099737 | 0.4824675  | 90.9607096 |
| H | -2.2758333 | 0.5766552  | 91.4804478 |
| C | -1.0268989 | 1.3278142  | 89.8953514 |
| C | 4.4498191  | 0.6355920  | 87.6759733 |
| C | 4.7025123  | -0.6398840 | 87.1887240 |
| H | 5.6654782  | -0.8496950 | 86.6991307 |
| C | 3.7440302  | -1.6891110 | 87.3026969 |
| C | 3.9784437  | -2.9662648 | 86.7115345 |
| C | 2.5117622  | -1.4619785 | 88.0192264 |
| C | 1.5481527  | -2.5123097 | 88.0625319 |
| C | 2.2819025  | -0.1698134 | 88.6185985 |
| C | 3.2060480  | 0.8359708  | 88.3444041 |
| O | 0.4741845  | 2.0073739  | 88.1524228 |
| O | 2.9599950  | 2.1303380  | 88.8227060 |
| P | 1.7615517  | 3.0101190  | 88.1736767 |

|   |            |            |            |    |            |            |            |
|---|------------|------------|------------|----|------------|------------|------------|
| O | 1.6474757  | 4.2482827  | 89.0936711 | H  | 7.3047177  | -0.0338154 | 91.3878330 |
| O | 1.9291145  | 3.4722910  | 86.7007274 | H  | 7.8817777  | 0.0235473  | 89.6882563 |
| C | 0.2639087  | -2.2606710 | 92.9804854 | C  | 6.1905996  | 2.0527318  | 88.8028196 |
| C | 1.4927477  | -2.4275552 | 92.2875498 | C  | 4.3534404  | 3.5802431  | 84.4572307 |
| H | -1.6006768 | -1.1637248 | 93.0821707 | C  | 5.5599586  | 2.5874971  | 86.4808649 |
| H | 0.0480367  | -2.8714266 | 93.8702797 | H  | 5.7674940  | 0.3896833  | 84.7692434 |
| H | 2.7332994  | -1.8065674 | 90.6364580 | H  | 6.4611122  | 1.8038752  | 83.9154472 |
| H | 2.2308642  | -3.1582375 | 92.6519166 | C  | 6.0704226  | 1.2103398  | 90.0725756 |
| C | 1.7986750  | -3.7369140 | 87.4588683 | C  | 5.4356312  | 1.7643761  | 87.6330522 |
| C | 3.0283342  | -3.9736862 | 86.7887161 | C  | 4.7633616  | 2.3043553  | 85.2103175 |
| H | 0.5863709  | -2.3366606 | 88.5641798 | H  | 4.4249033  | 2.4075031  | 90.9020576 |
| H | 1.0339209  | -4.5278072 | 87.4933478 | H  | 3.8880261  | 4.3214203  | 85.1380569 |
| H | 3.2179750  | -4.9507241 | 86.3187357 | H  | 6.0430680  | 2.8678099  | 91.5202065 |
| H | 4.9261282  | -3.1304836 | 86.1751625 | H  | 6.2418120  | 6.5655267  | 87.9544489 |
| C | -1.9992798 | 3.6785390  | 89.8100632 | H  | 5.2232595  | 4.0696821  | 83.9725203 |
| C | -2.0086148 | 2.3273460  | 89.3617148 | H  | 9.3280944  | 4.8227556  | 89.4318608 |
| C | -2.9001723 | 4.5833234  | 89.2261745 | H  | 5.4063529  | 0.3512250  | 89.8459254 |
| C | -2.9249722 | 1.9100624  | 88.3613476 | H  | 3.8352475  | 1.7779139  | 85.5265404 |
| C | -3.8033449 | 2.8631172  | 87.8033098 | H  | 7.6167404  | 3.3979632  | 89.7168788 |
| C | -3.8034659 | 4.2056452  | 88.2127616 | C  | 1.3929643  | 5.5340956  | 79.6408369 |
| H | -2.9005055 | 5.6310448  | 89.5640322 | C  | 1.0620954  | 4.9505408  | 80.8724112 |
| C | -2.9969630 | 0.4605741  | 87.8793927 | C  | 1.4287297  | 5.5790322  | 82.0789359 |
| H | -4.5047805 | 2.5334410  | 87.0226152 | C  | 2.1495479  | 6.7880498  | 82.0336602 |
| C | -2.5901435 | 0.3134485  | 86.4028172 | C  | 2.4803426  | 7.3742672  | 80.7991614 |
| H | -3.2427051 | 0.9167010  | 85.7366728 | C  | 2.0988953  | 6.7504812  | 79.6006289 |
| H | -2.6729823 | -0.7450880 | 86.0808718 | H  | 1.1049404  | 5.0341216  | 78.7028163 |
| H | -1.5391116 | 0.6221484  | 86.2366278 | H  | 0.5330162  | 3.9860649  | 80.9150004 |
| C | -4.3863921 | -0.1456336 | 88.1495984 | C  | 1.0440620  | 4.9511402  | 83.4120095 |
| H | -2.2679726 | -0.1274605 | 88.4727681 | H  | 2.4716598  | 7.2643345  | 82.9745029 |
| H | -5.1782917 | 0.3658895  | 87.5632977 | H  | 3.0481082  | 8.3173932  | 80.7759448 |
| H | -4.6587610 | -0.0664604 | 89.2218907 | H  | 2.3605898  | 7.2058874  | 78.6329668 |
| H | -4.4045969 | -1.2186534 | 87.8679763 | O  | 1.2167522  | 3.5902078  | 83.3989502 |
| C | -4.7091247 | 5.2659728  | 87.5898384 | Zn | 1.6842177  | 5.7030216  | 87.7721764 |
| C | -3.8976666 | 6.1941711  | 86.6624177 | Br | 3.0814446  | 7.2128997  | 86.7788687 |
| H | -4.5330931 | 7.0106272  | 86.2611590 | H  | -0.0344024 | 7.4641847  | 83.4282298 |
| H | -3.4938771 | 5.6207672  | 85.8012330 | Br | 1.2142071  | 0.2649160  | 85.0876785 |
| H | -3.0431398 | 6.6562320  | 87.1955046 | Zn | 1.2885294  | 2.5829339  | 84.9869295 |
| C | -5.9303962 | 4.6986126  | 86.8566296 | C  | -0.4998147 | 5.6001969  | 83.7266196 |
| H | -5.0822751 | 5.8919990  | 88.4318461 | C  | -0.7320379 | 6.7954936  | 83.9656068 |
| H | -6.6000418 | 5.5189831  | 86.5283279 | C  | -0.8110663 | 4.7296578  | 85.0669281 |
| H | -6.5177567 | 4.0149427  | 87.5022093 | C  | -1.1156433 | 3.4563502  | 85.4362989 |
| H | -5.6348230 | 4.1353802  | 85.9465301 | C  | -0.5199015 | 5.8171712  | 86.0213730 |
| C | -1.0711204 | 4.1238433  | 90.9385216 | O  | -0.4853378 | 6.9903630  | 85.3969584 |
| C | -0.6601839 | 5.6015470  | 90.8585533 | O  | -0.2713897 | 5.7251810  | 87.2405175 |
| H | 0.1555504  | 5.8097378  | 91.5793880 | H  | -1.7752570 | 7.1097026  | 83.7623354 |
| H | -1.5014922 | 6.2805281  | 91.1100217 | H  | -1.1040768 | 4.8868871  | 82.8977432 |
| H | -0.3019446 | 5.8664251  | 89.8458233 | H  | 1.6436497  | 5.4699148  | 84.2090202 |
| C | -1.7011268 | 3.8191894  | 92.3125567 | H  | -1.2283420 | 3.1933416  | 86.5004441 |
| H | -0.1417782 | 3.5224526  | 90.8525179 | H  | -1.3964188 | 2.7047349  | 84.6829784 |
| H | -1.0152007 | 4.1152710  | 93.1331297 |    |            |            |            |
| H | -1.9277910 | 2.7419024  | 92.4321033 |    |            |            |            |
| H | -2.6504084 | 4.3807631  | 92.4389640 |    |            |            |            |
| H | 8.1677531  | 5.5957011  | 86.6672806 |    |            |            |            |
| H | 8.1494943  | 1.4200900  | 90.7772940 |    |            |            |            |
| H | 4.8909001  | 1.1080981  | 83.3817350 |    |            |            |            |
| C | 8.0151033  | 5.2790706  | 87.7228273 |    |            |            |            |
| H | 5.2598728  | 1.3660385  | 92.1058290 |    |            |            |            |
| H | 7.7915110  | 7.3577826  | 88.4092809 |    |            |            |            |
| H | 3.6274181  | 3.3469618  | 83.6521714 |    |            |            |            |
| C | 7.1780988  | 4.0067338  | 87.6821752 |    |            |            |            |
| C | 7.4267205  | 0.6237070  | 90.5022776 |    |            |            |            |
| C | 7.2293159  | 6.4008311  | 88.4319639 |    |            |            |            |
| H | 7.0467171  | 6.1379453  | 89.4954738 |    |            |            |            |
| C | 7.0484964  | 3.1680276  | 88.8017630 |    |            |            |            |
| C | 5.5141746  | 1.3443356  | 84.2687610 |    |            |            |            |
| H | 9.9646435  | 4.2678094  | 87.8511416 |    |            |            |            |
| C | 6.4357254  | 3.6871952  | 86.5325014 |    |            |            |            |
| C | 9.4014660  | 5.0797417  | 88.3543751 |    |            |            |            |
| H | 10.0005015 | 6.0106974  | 88.2822298 |    |            |            |            |
| H | 6.5286517  | 4.3419378  | 85.6526317 |    |            |            |            |
| C | 5.4104142  | 2.0084666  | 91.2133331 |    |            |            |            |

### 15b-ma

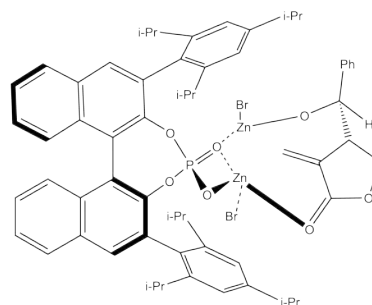

Energy (Hartree) = -11970.02054797

|   |            |            |            |
|---|------------|------------|------------|
| C | 0.2146065  | 1.1358697  | 89.2159892 |
| C | 1.1053337  | 0.0971428  | 89.4987877 |
| C | 0.8418123  | -0.7038654 | 90.6721684 |
| C | 1.7702801  | -1.6682310 | 91.1673616 |
| C | -0.3895082 | -0.5050118 | 91.3989740 |
| C | -0.6587971 | -1.3082411 | 92.5470646 |
| C | -1.3132812 | 0.4860241  | 90.9585551 |

|   |            |            |            |    |            |            |            |
|---|------------|------------|------------|----|------------|------------|------------|
| H | -2.2807257 | 0.5828545  | 91.4749555 | H  | 7.7903540  | 7.3555063  | 88.3644502 |
| C | -1.0281415 | 1.3288272  | 89.8920043 | H  | 3.6309854  | 3.3214739  | 83.6310935 |
| C | 4.4489098  | 0.6289111  | 87.6764248 | C  | 7.1768004  | 3.9992883  | 87.6602672 |
| C | 4.7006368  | -0.6489217 | 87.1954438 | C  | 7.4263666  | 0.6279454  | 90.4950271 |
| H | 5.6634955  | -0.8590733 | 86.7058515 | C  | 7.2271392  | 6.3993048  | 88.3912508 |
| C | 3.7433636  | -1.6981895 | 87.3149170 | H  | 7.0406758  | 6.1437903  | 89.4557327 |
| C | 3.9770514  | -2.9776957 | 86.7297126 | C  | 7.0479946  | 3.1673915  | 88.7844229 |
| C | 2.5118517  | -1.4681841 | 88.0314893 | C  | 5.5062149  | 1.3144960  | 84.2649622 |
| C | 1.5488163  | -2.5185534 | 88.0800636 | H  | 9.9614281  | 4.2584788  | 87.8318505 |
| C | 2.2822471  | -0.1733157 | 88.6252856 | C  | 6.4330696  | 3.6733357  | 86.5137996 |
| C | 3.2059857  | 0.8313338  | 88.3457298 | C  | 9.3995471  | 5.0766874  | 88.3259190 |
| O | 0.4762009  | 2.0058182  | 88.1523789 | H  | 10.0005350 | 6.0056118  | 88.2452488 |
| O | 2.9619320  | 2.1276100  | 88.8194250 | H  | 6.5247754  | 4.3233741  | 85.6304850 |
| P | 1.7621437  | 3.0091728  | 88.1785551 | C  | 5.4182936  | 2.0249643  | 91.2068752 |
| O | 1.6503383  | 4.2551127  | 89.0849750 | H  | 7.3068799  | -0.0233623 | 91.3854976 |
| O | 1.9250040  | 3.4797850  | 86.7018597 | H  | 7.8752172  | 0.0214156  | 89.6825328 |
| C | 0.2562917  | -2.2512802 | 92.9887835 | C  | 6.1900619  | 2.0527027  | 88.7930798 |
| C | 1.4856694  | -2.4201823 | 92.2985260 | C  | 4.3557705  | 3.5557326  | 84.4368820 |
| H | -1.6075176 | -1.1536662 | 93.0845224 | C  | 5.5574663  | 2.5736874  | 86.4687112 |
| H | 0.0386301  | -2.8593506 | 93.8799095 | H  | 5.7545809  | 0.3617820  | 84.7711337 |
| H | 2.7285944  | -1.8032053 | 90.6472295 | H  | 6.4556770  | 83.9096239 | 83.9096239 |
| H | 2.2228416  | -3.1503456 | 92.6656482 | C  | 6.0708856  | 1.2182335  | 90.0681179 |
| C | 1.7994953  | -3.7454927 | 87.4822558 | C  | 5.4343510  | 1.7575239  | 87.6258331 |
| C | 3.0280441  | -3.9849126 | 86.8123627 | C  | 4.7599203  | 2.2840294  | 85.2001290 |
| H | 0.5874601  | -2.3400681 | 88.5812323 | H  | 4.4340713  | 2.4279797  | 90.8972365 |
| H | 1.0347186  | -4.5360759 | 87.5205342 | H  | 3.8947988  | 4.3060799  | 85.1106955 |
| H | 3.2173999  | -4.9635814 | 86.3458987 | H  | 6.0551955  | 2.8831818  | 91.5075736 |
| H | 4.9236547  | -3.1434058 | 86.1920357 | H  | 6.2411318  | 6.5626758  | 87.9107158 |
| C | -2.0013123 | 3.6785008  | 89.8011821 | H  | 5.2281642  | 4.0377044  | 83.9494793 |
| C | -2.0096717 | 2.3267480  | 89.3552683 | H  | 9.3261480  | 4.8309906  | 89.4059723 |
| C | -2.9061677 | 4.5798435  | 89.2186000 | H  | 5.4025781  | 0.3604703  | 89.8486099 |
| C | -2.9260714 | 1.9063632  | 88.3564755 | H  | 3.8298867  | 1.7624567  | 85.5197885 |
| C | -3.8089402 | 2.8561334  | 87.8007738 | H  | 7.6174237  | 3.4023388  | 89.6974250 |
| C | -3.8122517 | 4.1984358  | 88.2098338 | C  | 1.4899313  | 5.5789640  | 79.6802772 |
| H | -2.9068586 | 5.6280208  | 89.5548857 | C  | 1.1449006  | 4.9764943  | 80.8981736 |
| C | -2.9970971 | 0.4558447  | 87.8775980 | C  | 1.4566860  | 5.6094014  | 82.1171256 |
| H | -4.5122945 | 2.5234323  | 87.0230769 | C  | 2.1422177  | 6.8393594  | 82.0993465 |
| C | -2.6266177 | 0.3072112  | 86.3918065 | C  | 2.4871894  | 7.4435029  | 80.8782464 |
| H | -3.2972531 | 0.9062006  | 85.7398973 | C  | 2.1566465  | 6.8171510  | 79.6666278 |
| H | -2.7139727 | -0.7518352 | 86.0732703 | H  | 1.2455899  | 5.0757814  | 78.7316747 |
| H | -1.5804646 | 0.6170419  | 86.1989161 | H  | 0.6515941  | 3.9928697  | 80.9253914 |
| C | -4.3747930 | -0.1591258 | 88.1856721 | C  | 1.0493112  | 4.9632998  | 83.4344265 |
| H | -2.2487319 | -0.1252531 | 88.4534563 | H  | 2.4287200  | 7.3145885  | 83.0526012 |
| H | -5.1857076 | 0.3485015  | 87.6225490 | H  | 3.0279509  | 8.4025876  | 80.8757104 |
| H | -4.6185543 | -0.0810133 | 89.2647682 | H  | 2.4299477  | 7.2871191  | 78.7092792 |
| H | -4.3957585 | -1.2321889 | 87.9045292 | O  | 1.2211868  | 3.6052415  | 83.4094985 |
| C | -4.7235234 | 5.2553233  | 87.5894731 | Zn | 1.7116594  | 5.6465732  | 87.6762963 |
| C | -3.9202596 | 6.1799306  | 86.6516507 | Br | 3.0752504  | 7.2337769  | 86.7723834 |
| H | -4.5592254 | 6.9933039  | 86.2494030 | H  | -0.0672865 | 7.4679615  | 83.4240525 |
| H | -3.5201665 | 5.6016346  | 85.7919753 | Br | 1.1948232  | 0.2625047  | 85.1169001 |
| H | -3.0626957 | 6.6462728  | 87.1758841 | Zn | 1.3039399  | 2.5688310  | 84.9751631 |
| C | -5.9505937 | 4.6841924  | 86.8691570 | C  | -0.5051347 | 5.3003544  | 83.7212684 |
| H | -5.0910617 | 5.8844753  | 88.4317338 | C  | -0.7601332 | 6.7921800  | 83.9594585 |
| H | -6.6254828 | 5.5015550  | 86.5442076 | C  | -0.8258180 | 4.7257271  | 85.0571206 |
| H | -6.5304191 | 4.0010058  | 87.5217301 | C  | -1.1169710 | 3.4487531  | 85.4234601 |
| H | -5.6628693 | 4.1190453  | 85.9577708 | C  | -0.5414856 | 5.8141811  | 86.0128910 |
| C | -1.0687384 | 4.1295553  | 90.9236060 | O  | -0.5259115 | 6.9909043  | 85.3893238 |
| C | -0.6619693 | 5.6079764  | 90.8356175 | O  | -0.2762834 | 5.7225479  | 87.2270608 |
| H | 0.1631104  | 5.8184168  | 91.5448094 | H  | -1.8067362 | 7.0913909  | 83.7470849 |
| H | -1.5009881 | 6.2854166  | 91.0992152 | H  | -1.0861856 | 4.8791817  | 82.8796690 |
| H | -0.3178603 | 5.8718954  | 89.8181033 | H  | 1.6295515  | 5.4772838  | 84.2494604 |
| C | -1.6900889 | 3.8270716  | 92.3018053 | H  | -1.2288807 | 3.1812322  | 86.4865317 |
| H | -0.1377402 | 3.5313688  | 90.8343461 | H  | -1.3823576 | 2.6929647  | 84.6688598 |
| H | -1.0021739 | 4.1313294  | 93.1175665 |    |            |            |            |
| H | -1.9086206 | 2.7489943  | 92.4281386 |    |            |            |            |
| H | -2.6424499 | 4.3826072  | 92.4307340 |    |            |            |            |
| H | 8.1678994  | 5.5796766  | 86.6343963 |    |            |            |            |
| H | 8.1545593  | 1.4223265  | 90.7610075 |    |            |            |            |
| H | 4.8818276  | 1.0751171  | 83.3798177 |    |            |            |            |
| C | 8.0136309  | 5.2717860  | 87.6924350 |    |            |            |            |
| H | 5.2675302  | 1.3885359  | 92.1035989 |    |            |            |            |

15c-ma; COSMO

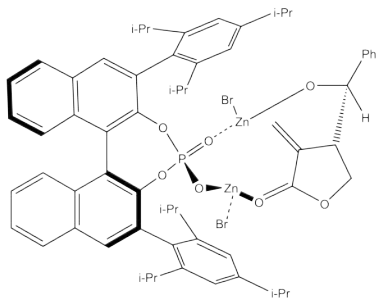

Energy (Hartree) = -11970.0376757

|   |            |            |             |
|---|------------|------------|-------------|
| C | 1.2897182  | 1.8762778  | 100.5927187 |
| C | 1.7677409  | 0.5588166  | 100.5649649 |
| C | 2.2237889  | -0.0116550 | 101.8114614 |
| C | 2.8854345  | -1.2751905 | 101.8848946 |
| C | 2.0433961  | 0.7322683  | 103.0358672 |
| C | 2.4625888  | 0.1568926  | 104.2732538 |
| C | 1.4829184  | 2.0406437  | 102.9887882 |
| H | 1.3338875  | 2.5912865  | 103.9303010 |
| C | 1.1427805  | 2.6459777  | 101.7854445 |
| C | 2.7022091  | -0.2401698 | 96.9206099  |
| C | 2.2322340  | -1.5408949 | 96.7911078  |
| H | 2.3809785  | -2.0814873 | 95.8448992  |
| C | 1.5016579  | -2.1836254 | 97.8344641  |
| C | 0.9450790  | -3.4834075 | 97.6414622  |
| C | 1.2662103  | -1.4986542 | 99.0838784  |
| C | 0.4256795  | -2.1222420 | 100.0519382 |
| C | 1.8533339  | -0.1962338 | 99.2803801  |
| C | 2.5113857  | 0.3814087  | 98.1956779  |
| O | 0.8756577  | 2.4966597  | 99.4145222  |
| O | 3.0400820  | 1.6630109  | 98.3609569  |
| P | 1.9843503  | 2.9019754  | 98.2696785  |
| O | 2.8027767  | 4.1214964  | 98.7178327  |
| O | 1.2011832  | 2.9900822  | 96.9624063  |
| C | 3.0730060  | -1.0875029 | 104.3106848 |
| C | 3.2992982  | -1.7987590 | 103.1020279 |
| H | 2.3046968  | 0.7318134  | 105.1993318 |
| H | 3.3975751  | -1.5174986 | 105.2704616 |
| H | 3.0772996  | -1.8342467 | 100.9590111 |
| H | 3.8124219  | -2.7722065 | 103.1285431 |
| C | -0.1176338 | -3.3792928 | 99.8239013  |
| C | 0.1557056  | -4.0751822 | 98.6164614  |
| H | 0.1961080  | -1.5878437 | 100.9842669 |
| H | -0.7715468 | -3.8362113 | 100.5823454 |
| H | -0.2746246 | -5.0743599 | 98.4491838  |
| H | 1.1387541  | -4.0009412 | 96.6887641  |
| C | 1.4808437  | 5.1600243  | 101.8083607 |
| C | 0.6014205  | 4.0437044  | 101.7381971 |
| C | 0.9263953  | 6.4540756  | 101.8606592 |
| C | -0.8016651 | 4.2477057  | 101.6412975 |
| C | -1.3031290 | 5.5611827  | 101.6909400 |
| C | -0.4604936 | 6.6796444  | 101.8148715 |
| H | 1.5954512  | 7.3268235  | 101.9257262 |
| C | -1.7751550 | 3.0828825  | 101.4756102 |
| H | -2.3921346 | 5.7138523  | 101.6212479 |
| C | -2.6144965 | 3.2219186  | 100.1937160 |
| H | -3.2814436 | 4.1086060  | 100.2269094 |
| H | -3.2478947 | 2.3255524  | 100.0394889 |
| H | -1.9659113 | 3.3149501  | 99.2997446  |
| C | -2.6619636 | 2.9125528  | 102.7220498 |
| H | -1.1790482 | 2.1540062  | 101.3702312 |
| H | -3.2968666 | 3.8073809  | 102.8921799 |
| H | -2.0475102 | 2.7580220  | 103.6323896 |
| H | -3.3351089 | 2.0379645  | 102.6085085 |
| C | -1.0243215 | 8.0945278  | 101.8494676 |
| C | -1.6777986 | 8.4684904  | 100.5058402 |
| H | -2.0375834 | 9.5181724  | 100.5186182 |

|    |            |            |             |
|----|------------|------------|-------------|
| H  | -2.5503450 | 7.8165305  | 100.2903078 |
| H  | -0.9631496 | 8.3574863  | 99.6651860  |
| C  | -1.9989668 | 8.2975916  | 103.0226749 |
| H  | -0.1627133 | 8.7803893  | 102.0049593 |
| H  | -2.3476037 | 9.3499764  | 103.0671912 |
| H  | -1.5205916 | 8.0515708  | 103.9921326 |
| H  | -2.8974648 | 7.6541571  | 102.9174761 |
| C  | 2.9992606  | 4.9838361  | 101.7933105 |
| C  | 3.7166842  | 6.0750232  | 100.9748702 |
| H  | 4.7406012  | 5.7508511  | 100.6958610 |
| H  | 3.8256673  | 7.0274399  | 101.5332615 |
| H  | 3.1348688  | 6.3397501  | 100.0619150 |
| C  | 3.5915801  | 4.9221391  | 103.2139011 |
| H  | 3.2051046  | 4.0143305  | 101.2956639 |
| H  | 4.6929763  | 4.7927977  | 103.1755913 |
| H  | 3.1712555  | 4.0768261  | 103.7921035 |
| H  | 3.3744822  | 5.8571216  | 103.7715234 |
| H  | 3.9681740  | 3.9789102  | 92.4185068  |
| H  | 7.1989154  | 0.3531600  | 95.5793011  |
| H  | 0.1532095  | -1.1963425 | 93.3745016  |
| C  | 4.3821263  | 4.0867134  | 93.4466236  |
| H  | 6.8568778  | 1.2745321  | 98.6531943  |
| H  | 3.7325668  | 6.1945041  | 93.5960937  |
| H  | -1.0247250 | 1.0318675  | 94.1356196  |
| C  | 4.0904481  | 2.7848383  | 94.1835600  |
| C  | 6.6027964  | -0.2422509 | 96.3024749  |
| C  | 3.6086615  | 5.2326249  | 94.1345435  |
| H  | 3.9838102  | 5.3819913  | 95.1699006  |
| C  | 4.9464762  | 2.2643356  | 95.1678732  |
| C  | 1.1413095  | -0.7084645 | 93.5055863  |
| H  | 6.4522744  | 3.6006053  | 92.8827629  |
| C  | 2.8661987  | 2.1281367  | 93.9658284  |
| C  | 5.8715671  | 4.4331340  | 93.3287954  |
| H  | 6.0109433  | 5.3300372  | 92.6920617  |
| H  | 2.2039332  | 2.5061139  | 93.1707673  |
| C  | 6.2331914  | 1.7337885  | 97.8588428  |
| H  | 7.3055816  | -0.6900048 | 97.0357428  |
| H  | 6.1180386  | -1.0663769 | 95.7406014  |
| C  | 4.5644855  | 1.1875305  | 95.9890506  |
| C  | -0.0073567 | 1.4633889  | 94.0542074  |
| C  | 2.4255606  | 1.0637586  | 94.7709806  |
| H  | 1.8668695  | -1.4819362 | 93.8259297  |
| H  | 1.4745669  | -0.3351514 | 92.5143121  |
| C  | 5.5585478  | 0.6421782  | 97.0128227  |
| C  | 3.2702610  | 0.6169904  | 95.8315955  |
| C  | 1.0503891  | 0.4504244  | 94.5177148  |
| H  | 5.4819923  | 2.3866009  | 98.3436120  |
| H  | 0.0269115  | 2.3979523  | 94.6535399  |
| H  | 6.8995441  | 2.3811893  | 97.2527921  |
| H  | 2.5246907  | 5.0088388  | 94.2002395  |
| H  | 0.1316677  | 1.7842195  | 93.0011452  |
| H  | 6.3114943  | 4.6674677  | 94.3205451  |
| H  | 4.9989415  | -0.0178058 | 97.7075125  |
| H  | 0.6900646  | 0.0337613  | 95.4812837  |
| H  | 5.9285742  | 2.7301288  | 95.3323782  |
| Zn | 3.8851390  | 5.5452954  | 98.0564599  |
| Br | 6.1196482  | 5.7537503  | 97.6332299  |
| H  | 0.1068304  | 7.1369266  | 94.0198762  |
| Br | -1.5270548 | 0.4808261  | 97.5273274  |
| Zn | -0.7741872 | 2.5498811  | 96.8471027  |
| C  | -0.6981885 | 6.4148541  | 95.9759196  |
| C  | 0.0520088  | 7.4178933  | 95.0880293  |
| C  | 0.1777542  | 6.3663296  | 97.1985422  |
| C  | -0.0933028 | 5.8375370  | 98.4130259  |
| C  | 1.4916399  | 6.8912817  | 96.7952528  |
| O  | 1.4268144  | 7.4492235  | 95.5887902  |
| O  | 2.5821373  | 6.8910453  | 97.4056705  |
| H  | -0.3455372 | 8.4488959  | 95.1708900  |
| C  | -3.4983414 | 5.0158629  | 92.6535016  |
| C  | -2.8765131 | 4.9986838  | 93.9106859  |
| C  | -1.4718796 | 4.9609399  | 94.0132307  |

|   |            |           |            |
|---|------------|-----------|------------|
| C | -0.7036919 | 4.9192470 | 92.8328672 |
| C | -1.3235834 | 4.9340536 | 91.5715928 |
| C | -2.7237339 | 4.9866658 | 91.4795348 |
| H | -4.5972921 | 5.0434167 | 92.5859946 |
| H | -3.4724475 | 4.9895047 | 94.8361365 |
| C | -0.8097662 | 4.9537473 | 95.3872708 |
| H | 0.3952311  | 4.8545194 | 92.9017282 |
| H | -0.7096486 | 4.8938418 | 90.6583595 |
| H | -3.2131366 | 4.9936273 | 90.4932894 |
| O | -1.5150729 | 4.1808860 | 96.2992445 |
| H | 0.6740304  | 5.7733588 | 99.1987616 |
| H | -1.0997101 | 5.4646099 | 98.6433686 |
| H | -1.7311966 | 6.7489419 | 96.1954624 |
| H | 0.2483955  | 4.6063414 | 95.2413402 |

### 15c-ma

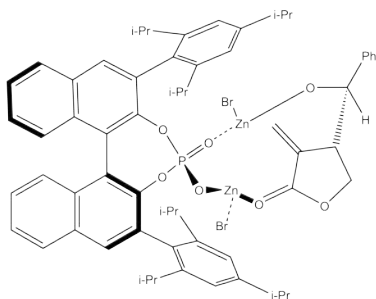

Energy (Hartree) = -11970.02653122

|   |            |            |             |
|---|------------|------------|-------------|
| C | 1.2884250  | 1.8810249  | 100.5965133 |
| C | 1.7665077  | 0.5635798  | 100.5670083 |
| C | 2.2238065  | -0.0078836 | 101.8125643 |
| C | 2.8862444  | -1.2708380 | 101.8835936 |
| C | 2.0430918  | 0.7333518  | 103.0382927 |
| C | 2.4630777  | 0.1556338  | 104.2737344 |
| C | 1.4814288  | 2.0409445  | 102.9928957 |
| H | 1.3306598  | 2.5910453  | 103.9345134 |
| C | 1.1416639  | 2.6483754  | 101.7907930 |
| C | 2.6927533  | -0.2326767 | 96.9203029  |
| C | 2.2239747  | -1.5337685 | 96.7923864  |
| H | 2.3707905  | -2.0726067 | 95.8449348  |
| C | 1.4974002  | -2.1784013 | 97.8369200  |
| C | 0.9424951  | -3.4786179 | 97.6456946  |
| C | 1.2642141  | -1.4941785 | 99.0869510  |
| C | 0.4273030  | -2.1193209 | 100.0567734 |
| C | 1.8500321  | -0.1909801 | 99.2821111  |
| C | 2.5046371  | 0.3880434  | 98.1961364  |
| O | 0.8713573  | 2.5039541  | 99.4217773  |
| O | 3.0314027  | 1.6703922  | 98.3605644  |
| P | 1.9722736  | 2.9067979  | 98.2691235  |
| O | 2.7900868  | 4.1308814  | 98.7125165  |
| O | 1.1850932  | 2.9923581  | 96.9653931  |
| C | 3.0742439  | -1.0878597 | 104.3088829 |
| C | 3.3004524  | -1.7963132 | 103.0992639 |
| H | 2.3053474  | 0.7288191  | 105.2009375 |
| H | 3.3994031  | -1.5191248 | 105.2678264 |
| H | 3.0770921  | -1.8272463 | 100.9560360 |
| H | 3.8140221  | -2.7695129 | 103.1235583 |
| C | -0.1136133 | -3.3771696 | 99.8300904  |
| C | 0.1575488  | -4.0721207 | 98.6223858  |
| H | 0.1989102  | -1.5844554 | 100.9889497 |
| H | -0.7652115 | -3.8348501 | 100.5899244 |
| H | -0.2718704 | -5.0716723 | 98.4556180  |
| H | 1.1334660  | -3.9949251 | 96.6918368  |
| C | 1.4788454  | 5.1620918  | 101.8177794 |
| C | 0.5998806  | 4.0457667  | 101.7451128 |
| C | 0.9229856  | 6.4552167  | 101.8706818 |

|   |            |            |             |
|---|------------|------------|-------------|
| C | -0.8030114 | 4.2486008  | 101.6449766 |
| C | -1.3050838 | 5.5614841  | 101.6962141 |
| C | -0.4635794 | 6.6800224  | 101.8235477 |
| H | 1.5916422  | 7.3280945  | 101.9373438 |
| C | -1.7747730 | 3.0830181  | 101.4745006 |
| H | -2.3941554 | 5.7131176  | 101.6253354 |
| C | -2.6215040 | 3.2286690  | 100.1984688 |
| H | -3.2976615 | 4.1078935  | 100.2442072 |
| H | -3.2457866 | 2.3277932  | 100.0351240 |
| H | -1.9787857 | 3.3381245  | 99.3023367  |
| C | -2.6531897 | 2.9002267  | 102.7249397 |
| H | -1.1770754 | 2.1566173  | 101.3578242 |
| H | -3.2876746 | 3.7927142  | 102.9082883 |
| H | -2.0330904 | 2.7383097  | 103.6299704 |
| H | -3.3264948 | 2.0263016  | 102.6081430 |
| C | -1.0285538 | 8.0944228  | 101.8617586 |
| C | -1.6927297 | 8.4691476  | 100.5238150 |
| H | -2.0520326 | 9.5189518  | 100.5384247 |
| H | -2.5677718 | 7.8183957  | 100.3152677 |
| H | -0.9856539 | 8.3564907  | 99.6771098  |
| C | -1.9931165 | 8.2967365  | 103.0432314 |
| H | -0.1661834 | 8.7810899  | 102.0106229 |
| H | -2.3437253 | 9.3482684  | 103.0917469 |
| H | -1.5063444 | 8.0504570  | 104.0081492 |
| H | -2.8911682 | 7.6515269  | 102.9465716 |
| C | 2.9976474  | 4.9869411  | 101.8032812 |
| C | 3.7151925  | 6.0822886  | 100.9904853 |
| H | 4.7400390  | 5.7608066  | 100.7119476 |
| H | 3.8209855  | 7.0313857  | 101.5555958 |
| H | 3.1417667  | 6.3424824  | 100.0732575 |
| C | 3.5879031  | 4.9161239  | 103.2241537 |
| H | 3.2035079  | 4.0202420  | 101.2998657 |
| H | 4.6898452  | 4.7912857  | 103.1869295 |
| H | 3.1711408  | 4.0647810  | 103.7957156 |
| H | 3.3666908  | 5.8457941  | 103.7889759 |
| H | 3.9490412  | 3.9754933  | 92.4089118  |
| H | 7.1841585  | 0.3637216  | 95.5655158  |
| H | 0.1427943  | -1.1956125 | 93.3776121  |
| C | 4.3699095  | 4.0867941  | 93.4340964  |
| H | 6.8544698  | 1.2746304  | 98.6422730  |
| H | 3.7286041  | 6.1989876  | 93.5749900  |
| H | -1.0398734 | 1.0318890  | 94.1414315  |
| C | 4.0758364  | 2.7894258  | 94.1780904  |
| C | 6.5904167  | -0.2337797 | 96.2886635  |
| C | 3.6078392  | 5.2407516  | 94.1206727  |
| H | 3.9969606  | 5.3987171  | 95.1495960  |
| C | 4.9324080  | 2.2719146  | 95.1632209  |
| C | 1.1295150  | -0.7047852 | 93.5074103  |
| H | 6.4335011  | 3.5854958  | 92.8612394  |
| C | 2.8511767  | 2.1330907  | 93.9636533  |
| C | 5.8604602  | 4.4242748  | 93.3050661  |
| H | 6.0019267  | 5.3160627  | 92.6616800  |
| H | 2.1879979  | 2.5088497  | 93.1682367  |
| C | 6.2253055  | 1.7362980  | 97.8538208  |
| H | 7.2958159  | -0.6844721 | 97.0175322  |
| H | 6.1040051  | -1.0552576 | 95.7247129  |
| C | 4.5518881  | 1.1957263  | 95.9855142  |
| C | -0.0234600 | 1.4645013  | 94.0550506  |
| C | 2.4114060  | 1.0699225  | 94.7704948  |
| H | 1.8580139  | -1.4758570 | 93.8266405  |
| H | 1.4616109  | -0.3320510 | 92.5156368  |
| C | 5.5485703  | 0.6481155  | 97.0054961  |
| C | 3.2577405  | 0.6248044  | 95.8301291  |
| C | 1.0368996  | 0.4544527  | 94.5187934  |
| H | 5.4760419  | 2.3842357  | 98.3477200  |
| H | 0.0105071  | 2.4000992  | 94.6522035  |
| H | 6.8868444  | 2.3898935  | 97.2494156  |
| H | 2.5241782  | 5.0206068  | 94.2017986  |
| H | 0.1109673  | 1.7829219  | 93.0005833  |
| H | 6.3071669  | 4.6637348  | 94.2923808  |
| H | 4.9907123  | -0.0145829 | 97.6990966  |

|    |            |           |            |
|----|------------|-----------|------------|
| H  | 0.6767581  | 0.0383164 | 95.4827051 |
| H  | 5.9146676  | 2.7379278 | 95.3258087 |
| Zn | 3.8982657  | 5.5038065 | 97.9903486 |
| Br | 6.1283298  | 5.7337568 | 97.5981189 |
| H  | 0.1276187  | 7.1391301 | 94.0177081 |
| Br | -1.5331000 | 0.4847728 | 97.5401395 |
| Zn | -0.8000538 | 2.5504488 | 96.8516364 |
| C  | -0.6879530 | 6.4241305 | 95.9698315 |
| C  | 0.0724032  | 7.4224164 | 95.0854466 |
| C  | 0.1772761  | 6.3799740 | 97.1996872 |
| C  | -0.1024603 | 5.8491341 | 98.4116232 |
| C  | 1.4976057  | 6.8930168 | 96.8025440 |
| O  | 1.4428125  | 7.4484872 | 95.5916388 |
| O  | 2.5826879  | 6.8821938 | 97.4194905 |
| H  | -0.3225502 | 8.4556903 | 95.1637522 |
| C  | -3.4568268 | 4.9526832 | 92.6348405 |
| C  | -2.8456223 | 4.9460787 | 93.8968426 |
| C  | -1.4418282 | 4.9524380 | 94.0105107 |
| C  | -0.6629753 | 4.9395758 | 92.8363863 |
| C  | -1.2729312 | 4.9440999 | 91.5706494 |
| C  | -2.6727795 | 4.9558123 | 91.4676379 |
| H  | -4.5554073 | 4.9445929 | 92.5581248 |
| H  | -3.4441914 | 4.9066631 | 94.8196259 |
| C  | -0.7929044 | 4.9567059 | 95.3912081 |
| H  | 0.4366455  | 4.9016035 | 92.9148791 |
| H  | -0.6513160 | 4.9262702 | 90.6619510 |
| H  | -3.1541376 | 4.9538735 | 90.4775397 |
| O  | -1.5058922 | 4.1977202 | 96.3044105 |
| H  | 0.6615938  | 5.7800733 | 99.2003042 |
| H  | -1.1109770 | 5.4768373 | 98.6336535 |
| H  | -1.7247837 | 6.7550544 | 96.1760338 |
| H  | 0.2675195  | 4.6095811 | 95.2588431 |

|   |            |            |             |
|---|------------|------------|-------------|
| O | 0.3742928  | 2.4137666  | 270.8033534 |
| O | 1.4198788  | 4.1342229  | 269.0676288 |
| C | 1.5884203  | -4.5199185 | 268.2701717 |
| C | 2.8537165  | -3.8753134 | 268.2311969 |
| H | -0.5566392 | -4.2439596 | 268.3857585 |
| H | 1.5316545  | -5.6189268 | 268.2873773 |
| H | 3.9292288  | -2.0095400 | 268.1746770 |
| H | 3.7745294  | -4.4783113 | 268.2360434 |
| C | 4.4505432  | -1.0096990 | 264.6901277 |
| C | 5.7436010  | -0.4230740 | 264.6430774 |
| H | 2.5754510  | -1.1659167 | 265.7396178 |
| H | 4.1361194  | -1.7038632 | 263.8958320 |
| H | 6.4329500  | -0.6768635 | 263.8234580 |
| H | 7.1063026  | 0.9797145  | 265.5738408 |
| C | -2.0847686 | 0.5813934  | 270.4877383 |
| C | -1.7908867 | 0.6366962  | 269.0911408 |
| C | -3.1324532 | 1.3995001  | 270.9874456 |
| C | -2.5592488 | 1.4655904  | 268.2332501 |
| C | -3.6291691 | 2.2094037  | 268.7691609 |
| C | -3.9361448 | 2.2007317  | 270.1370013 |
| H | -3.4099947 | 1.3241529  | 272.0507066 |
| C | -2.2576232 | 1.5645350  | 266.7421578 |
| H | -4.2251310 | 2.8403034  | 268.0919291 |
| C | -1.8527320 | 2.9950062  | 266.3412954 |
| H | -2.6697182 | 3.7213800  | 266.5276266 |
| H | -1.6023216 | 3.0334403  | 265.2610878 |
| H | -0.9688726 | 3.3321685  | 266.9151562 |
| C | -3.4384444 | 1.0472062  | 265.9002362 |
| H | -1.3922263 | 0.9017356  | 266.5345317 |
| H | -4.3437690 | 1.6745486  | 266.0381877 |
| H | -3.7044732 | 0.0056438  | 266.1726447 |
| H | -3.1819119 | 1.0657244  | 264.8211654 |
| C | -5.0987959 | 3.0034168  | 270.7052991 |
| C | -4.8885490 | 4.5217762  | 270.5599442 |
| H | -5.7691502 | 5.0704232  | 270.9519815 |
| H | -4.7467477 | 4.8149149  | 269.4990164 |
| H | -3.9994363 | 4.8517680  | 271.1319639 |
| C | -6.4326245 | 2.5538872  | 270.0812359 |
| H | -5.1391670 | 2.7806920  | 271.7933976 |
| H | -7.2822795 | 3.0824594  | 270.5597754 |
| H | -6.5916425 | 1.4634976  | 270.2040855 |
| H | -6.4676572 | 2.7804910  | 268.9950814 |
| C | -1.3959141 | -0.4021577 | 271.4364913 |
| C | -0.9688078 | 0.1933313  | 272.7874612 |
| H | -0.5056258 | -0.5980003 | 273.4108632 |
| H | -1.8195156 | 0.6073848  | 273.3659475 |
| H | -0.2123625 | 0.9921128  | 272.6584393 |
| C | -2.3171425 | -1.6218527 | 271.6512514 |
| H | -0.4736763 | -0.7563318 | 270.9359567 |
| H | -1.8019548 | -2.3927818 | 272.2597668 |
| H | -2.6208009 | -2.0877084 | 270.6929154 |
| H | -3.2431845 | -1.3266458 | 272.1874985 |
| H | 6.1283099  | 7.9101604  | 270.8272421 |
| H | 7.3270474  | 2.8842254  | 272.5763482 |
| H | 5.6180930  | 5.2967442  | 265.3945272 |
| C | 5.4356192  | 7.3356575  | 271.4857817 |
| H | 4.7890547  | 1.0423490  | 273.1110517 |
| H | 4.3401039  | 9.1661681  | 271.9793911 |
| H | 3.1738521  | 5.7932849  | 265.6537904 |
| C | 5.2255408  | 5.9963639  | 270.7802423 |
| C | 7.0409425  | 2.0982483  | 271.8464169 |
| C | 4.1290727  | 8.1503372  | 271.5864336 |
| H | 3.4185361  | 7.6514590  | 272.2771296 |
| C | 5.4884916  | 4.7570441  | 271.3839788 |
| C | 5.7282955  | 5.3206797  | 266.4983705 |
| H | 7.0695726  | 6.6781502  | 272.8144721 |
| C | 4.7730301  | 5.9871603  | 269.4376311 |
| C | 6.0990079  | 7.2124241  | 272.8618711 |
| H | 6.2886297  | 8.2187739  | 273.2861899 |
| H | 4.5951686  | 6.9475960  | 268.9289810 |
| C | 4.6195064  | 2.0331786  | 272.6408318 |

### 15c-mi; COSMO

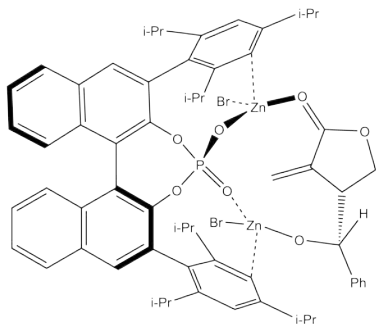

Energy (Hartree) = -11970.05677063

|   |            |            |             |
|---|------------|------------|-------------|
| C | 0.6196429  | 0.4728379  | 268.3255111 |
| C | 1.8113494  | -0.2332947 | 268.1214595 |
| C | 1.7689181  | -1.6761374 | 268.1953823 |
| C | 2.9419067  | -2.4903131 | 268.1947463 |
| C | 0.4886755  | -2.3330259 | 268.3051929 |
| C | 0.4299267  | -3.7593952 | 268.3159905 |
| C | -0.6860179 | -1.5499945 | 268.4883721 |
| H | -1.6476544 | -2.0647388 | 268.6342920 |
| C | -0.6334737 | -0.1649513 | 268.5835166 |
| C | 4.6700246  | 2.2881458  | 268.5816230 |
| C | 5.5666572  | 1.8613083  | 267.6097104 |
| H | 6.5306235  | 2.3819618  | 267.5033148 |
| C | 5.2339192  | 0.8362562  | 266.6800320 |
| C | 6.1211889  | 0.4890740  | 265.6167747 |
| C | 3.9453700  | 0.1931895  | 266.7671347 |
| C | 3.5749061  | -0.7101187 | 265.7249656 |
| C | 3.0775863  | 0.5085441  | 267.8789079 |
| C | 3.4496452  | 1.5588093  | 268.7301743 |
| O | 0.6297126  | 1.8634390  | 268.2514820 |
| O | 2.6380837  | 1.8953313  | 269.8113015 |
| P | 1.2199026  | 2.6954902  | 269.5527393 |

|    |            |            |             |
|----|------------|------------|-------------|
| H  | 7.2335854  | 1.1149984  | 272.3231654 |
| H  | 7.7122384  | 2.1929723  | 270.9685106 |
| C  | 5.2978538  | 3.5340639  | 270.7089356 |
| C  | 3.2459420  | 5.7569076  | 266.7599590 |
| C  | 4.6488442  | 4.7921419  | 268.6927760 |
| H  | 6.5836114  | 4.6706393  | 266.7727050 |
| H  | 5.9900526  | 6.3585896  | 266.7923211 |
| C  | 5.5613196  | 2.2209316  | 271.4385676 |
| C  | 4.8875371  | 3.5507104  | 269.3544321 |
| C  | 4.4209644  | 4.8701847  | 267.1827112 |
| H  | 3.5596167  | 2.1023962  | 272.3291924 |
| H  | 2.2967569  | 5.3470918  | 267.1527221 |
| H  | 4.7890560  | 2.8096226  | 273.4152677 |
| H  | 3.6148713  | 8.2572852  | 270.6101422 |
| H  | 3.3440017  | 6.7991882  | 267.1216324 |
| H  | 5.4415471  | 6.6707215  | 273.5734974 |
| H  | 5.3517777  | 1.3993563  | 270.7218173 |
| H  | 4.1939689  | 3.8474685  | 266.8238088 |
| H  | 5.8275834  | 4.7271782  | 272.4282806 |
| Zn | -1.3949481 | 3.0837171  | 271.3352683 |
| Br | -2.0896306 | 3.8196942  | 273.4425912 |
| C  | 1.9153757  | 10.8477948 | 267.0517477 |
| C  | 1.6521690  | 9.7737889  | 267.9143886 |
| C  | 1.1402962  | 8.5594188  | 267.4135674 |
| C  | 0.9173264  | 8.4375094  | 266.0283164 |
| C  | 1.1793963  | 9.5121879  | 265.1605962 |
| C  | 1.6758117  | 10.7222200 | 265.6709789 |
| H  | 2.3166127  | 11.7904472 | 267.4563753 |
| H  | 1.8579661  | 9.8519775  | 268.9930918 |
| C  | 0.8440239  | 7.4152998  | 268.3788691 |
| H  | 0.5589053  | 7.4788891  | 265.6179834 |
| H  | 1.0058122  | 9.3980944  | 264.0790779 |
| H  | 1.8864688  | 11.5641343 | 264.9933059 |
| O  | 1.8182447  | 7.3262195  | 269.3514812 |
| C  | -0.5939949 | 7.6417936  | 269.0202170 |
| C  | -0.8550264 | 6.6190221  | 270.0867203 |
| C  | -1.5578240 | 5.5098289  | 269.4228391 |
| O  | -2.0166209 | 5.9038745  | 268.2282611 |
| C  | -1.7228048 | 7.3242763  | 268.0314275 |
| O  | -1.7523094 | 4.3392674  | 269.7871259 |
| C  | -0.4917394 | 6.6294799  | 271.3901769 |
| H  | -2.6539780 | 7.8882881  | 268.2419566 |
| H  | -1.4533886 | 7.4523650  | 266.9665927 |
| Zn | 2.2283560  | 5.6692567  | 270.1673210 |
| Br | 2.1801536  | 4.9814100  | 272.4273117 |
| H  | -0.7500968 | 5.8040525  | 272.0710855 |
| H  | 0.0320936  | 7.4979968  | 271.8147004 |
| H  | 0.7440894  | 6.4805066  | 267.7669512 |
| H  | -0.6439212 | 8.6778139  | 269.4061859 |

|   |            |            |             |
|---|------------|------------|-------------|
| C | -0.6792966 | -1.5472906 | 268.4949430 |
| H | -1.6400079 | -2.0614354 | 268.6494678 |
| C | -0.6286007 | -0.1619365 | 268.5851410 |
| C | 4.6705430  | 2.2936713  | 268.5699053 |
| C | 5.5653483  | 1.8697699  | 267.5953170 |
| H | 6.5279053  | 2.3930182  | 267.4885973 |
| C | 5.2332047  | 0.8455170  | 266.6648002 |
| C | 6.1184691  | 0.5003846  | 265.5998457 |
| C | 3.9464528  | 0.1994101  | 266.7539074 |
| C | 3.5769484  | -0.7051566 | 265.7128176 |
| C | 3.0794158  | 0.5128152  | 267.8664550 |
| C | 3.4508500  | 1.5628961  | 268.7182913 |
| O | 0.6319392  | 1.8653271  | 268.2411542 |
| O | 2.6403160  | 1.8987596  | 269.7986323 |
| P | 1.2222155  | 2.6988583  | 269.5416529 |
| O | 0.3775286  | 2.4126576  | 270.7917885 |
| O | 1.4196620  | 4.1379607  | 269.0577295 |
| C | 1.5956821  | -4.5160352 | 268.2699326 |
| C | 2.8596131  | -3.8706451 | 268.2214579 |
| H | -0.5482409 | -4.2414147 | 268.3987364 |
| H | 1.5396743  | -5.6149855 | 268.2898798 |
| H | 3.9326141  | -2.0035965 | 268.1545086 |
| H | 3.7810164  | -4.4726565 | 268.2215424 |
| C | 4.4514585  | -1.0030127 | 264.6771312 |
| C | 5.7421124  | -0.4127642 | 264.6273297 |
| H | 2.5787349  | -1.1633429 | 265.7308499 |
| H | 4.1375683  | -1.6987147 | 263.8840415 |
| H | 6.4308610  | -0.6646924 | 263.8067115 |
| H | 7.1020801  | 0.9938437  | 265.5549456 |
| C | -2.0822725 | 0.5795291  | 270.4906340 |
| C | -1.7853828 | 0.6392042  | 269.0948241 |
| C | -3.1320445 | 1.3926226  | 270.9899002 |
| C | -2.5499615 | 1.4735860  | 268.2389157 |
| C | -3.6192473 | 2.2161939  | 268.7763113 |
| C | -3.9307196 | 2.2000104  | 270.1431078 |
| H | -3.4037180 | 1.3229249  | 272.0548939 |
| C | -2.2467055 | 1.5785283  | 266.7481652 |
| H | -4.2111651 | 2.8531238  | 268.1011238 |
| C | -1.8459825 | 3.0108491  | 266.3503123 |
| H | -2.6635639 | 3.7358364  | 266.5395073 |
| H | -1.5970335 | 3.0533622  | 265.2699356 |
| H | -0.9611928 | 3.3477654  | 266.9226036 |
| C | -3.4246015 | 1.0584672  | 265.9039588 |
| H | -1.3788150 | 0.9193550  | 266.5395927 |
| H | -4.3330950 | 1.6808598  | 266.0431489 |
| H | -3.6870942 | 0.0154060  | 266.1735904 |
| H | -3.1690053 | 1.0806733  | 264.8247168 |
| C | -5.0941435 | 3.0019114  | 270.7116954 |
| C | -4.8871380 | 4.5204996  | 270.5657894 |
| H | -5.7701880 | 5.0678190  | 270.9542726 |
| H | -4.7418695 | 4.8138521  | 269.5053479 |
| H | -4.0016510 | 4.8514038  | 271.1425283 |
| C | -6.4278356 | 2.5486609  | 270.0902480 |
| H | -5.1317915 | 2.7816472  | 271.8004298 |
| H | -7.2791428 | 3.0757786  | 270.5675359 |
| H | -6.5847079 | 1.4581583  | 270.2141091 |
| H | -6.4647683 | 2.7722689  | 269.0035382 |
| C | -1.3906041 | -0.4014882 | 271.4406502 |
| C | -0.9498457 | 0.2018635  | 272.7840661 |
| H | -0.4920404 | -0.5879896 | 273.4133887 |
| H | -1.7910630 | 0.6330128  | 273.3638336 |
| H | -0.1846601 | 0.9901472  | 272.6438377 |
| C | -2.3139272 | -1.6164783 | 271.6706001 |
| H | -0.4736044 | -0.7629562 | 270.9357357 |
| H | -1.7981960 | -2.3861591 | 272.2802935 |
| H | -2.6269429 | -2.0874318 | 270.7176586 |
| H | -3.2354862 | -1.3157468 | 272.2113918 |
| H | 6.1228976  | 7.8995796  | 270.8613483 |
| H | 7.3064949  | 2.8637582  | 272.5734421 |
| H | 5.6433042  | 5.3305889  | 265.4029512 |
| C | 5.4192642  | 7.3241253  | 271.5076256 |

### 15c-mi

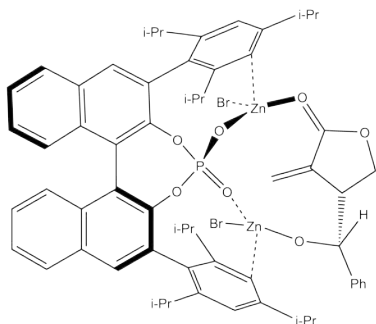

Energy (Hartree) = -11970.04648347

|   |           |            |             |
|---|-----------|------------|-------------|
| C | 0.6227905 | 0.4760094  | 268.3180930 |
| C | 1.8141494 | -0.2301322 | 268.1110703 |
| C | 1.7731512 | -1.6726680 | 268.1880088 |
| C | 2.9464324 | -2.4860804 | 268.1820020 |
| C | 0.4942936 | -2.3303399 | 268.3071017 |
| C | 0.4375383 | -3.7563169 | 268.3215268 |



|    |            |            |             |
|----|------------|------------|-------------|
| H  | 4.7587343  | 1.0303842  | 273.1014316 |
| H  | 4.3241714  | 9.1556192  | 271.9986070 |
| H  | 3.1924521  | 5.8124623  | 265.6523810 |
| C  | 5.2143641  | 5.9895313  | 270.7915938 |
| C  | 7.0168823  | 2.0804281  | 271.8421928 |
| C  | 4.1145143  | 8.1428694  | 271.5972391 |
| H  | 3.3943693  | 7.6429020  | 272.2769888 |
| C  | 5.4688891  | 4.7463870  | 271.3908004 |
| C  | 5.7461627  | 5.3473350  | 266.5075892 |
| H  | 7.0337847  | 6.6535370  | 272.8537153 |
| C  | 4.7752349  | 5.9883207  | 269.4448370 |
| C  | 6.0641898  | 7.1902475  | 272.8914187 |
| H  | 6.2514271  | 8.1930044  | 273.3249844 |
| H  | 4.6005894  | 6.9515957  | 268.9404572 |
| C  | 4.5940184  | 2.0232423  | 272.6340281 |
| H  | 7.2054115  | 1.0957919  | 272.3176181 |
| H  | 7.6895898  | 2.1742396  | 270.9654143 |
| C  | 5.2834316  | 3.5277100  | 270.7075967 |
| C  | 3.2601091  | 5.7693576  | 266.7585466 |
| C  | 4.6564182  | 4.7977869  | 268.6921152 |
| H  | 6.6035280  | 4.7004789  | 266.7830645 |
| H  | 6.0016335  | 6.3843589  | 266.8095222 |
| C  | 5.5380890  | 2.2108519  | 271.4337188 |
| C  | 4.8872637  | 3.5524849  | 269.3488104 |
| C  | 4.4374417  | 4.8855597  | 267.1812789 |
| H  | 3.5346200  | 2.0965869  | 272.3225177 |
| H  | 2.3113583  | 5.3522078  | 267.1445540 |
| H  | 4.7642580  | 2.7957409  | 273.4120229 |
| H  | 3.6129170  | 8.2585275  | 270.6155001 |
| H  | 3.3512474  | 6.8100953  | 267.1260851 |
| H  | 5.3948919  | 6.6471106  | 273.5905604 |
| H  | 5.3260313  | 1.3925585  | 270.7139931 |
| H  | 4.2178446  | 3.8643355  | 266.8136331 |
| H  | 5.7957249  | 4.7102528  | 272.4386414 |
| Zn | -1.3615802 | 3.1128481  | 271.3611359 |
| Br | -2.1246955 | 3.8202970  | 273.4411951 |
| C  | 1.9322046  | 10.8120619 | 266.9985082 |
| C  | 1.6702949  | 9.7509276  | 267.8764498 |
| C  | 1.1394516  | 8.5369293  | 267.3960402 |
| C  | 0.8980645  | 8.4019058  | 266.0152979 |
| C  | 1.1590255  | 9.4639089  | 265.1326758 |
| C  | 1.6730732  | 10.6740238 | 265.6232020 |
| H  | 2.3488758  | 11.7546733 | 267.3870337 |
| H  | 1.8931986  | 9.8368853  | 268.9510394 |
| C  | 0.8444042  | 7.4063109  | 268.3775086 |
| H  | 0.5289369  | 7.4405189  | 265.6209421 |
| H  | 0.9717365  | 9.3394570  | 264.0546794 |
| H  | 1.8833717  | 11.5061178 | 264.9335825 |
| O  | 1.8222526  | 7.3225029  | 269.3457221 |
| C  | -0.5863247 | 7.6484271  | 269.0288990 |
| C  | -0.8512139 | 6.6309803  | 270.1005519 |
| C  | -1.5579307 | 5.5232885  | 269.4394383 |
| O  | -2.0236865 | 5.9199103  | 268.2461064 |
| C  | -1.7258007 | 7.3372490  | 268.0501273 |
| O  | -1.7491271 | 4.3521882  | 269.8009313 |
| C  | -0.4893407 | 6.6431727  | 271.4047934 |
| H  | -2.6525741 | 7.9064112  | 268.2699345 |
| H  | -1.4634072 | 7.4688464  | 266.9838070 |
| Zn | 2.2308069  | 5.6682142  | 270.1697616 |
| Br | 2.1555269  | 4.9783145  | 272.4226214 |
| H  | -0.7566452 | 5.8250230  | 272.0913468 |
| H  | 0.0433363  | 7.5079739  | 271.8258308 |
| H  | 0.7341596  | 6.4646821  | 267.7773578 |
| H  | -0.6213250 | 8.6868941  | 269.4140032 |

### 15d-ma; COSMO

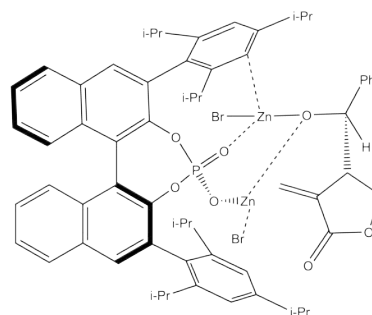

Energy (Hartree) = -11970.0622327

|    |            |            |             |
|----|------------|------------|-------------|
| Zn | 1.7550090  | 5.7565115  | 330.0225487 |
| Br | 1.9397519  | 6.9116342  | 332.0174502 |
| H  | 1.5916735  | 10.2377826 | 328.2569133 |
| Br | 2.6322048  | 5.9525030  | 324.8149263 |
| Zn | 3.2085077  | 5.2187989  | 326.9787957 |
| C  | 1.2666155  | 8.0877083  | 327.7667918 |
| C  | 0.7785679  | 9.5352549  | 327.9915906 |
| C  | 0.1606738  | 7.3003559  | 328.4111144 |
| C  | -0.1873679 | 6.0008108  | 328.2428992 |
| C  | -0.5922660 | 8.2267355  | 329.3287277 |
| O  | -0.1468155 | 9.4940155  | 329.1048965 |
| O  | -1.4636721 | 7.9593820  | 330.1286513 |
| H  | 0.2400161  | 9.9287943  | 327.1054802 |
| C  | 5.0728208  | 9.7000023  | 326.1755030 |
| C  | 4.0513774  | 8.8347651  | 326.5996696 |
| C  | 3.7516355  | 8.7013635  | 327.9707220 |
| C  | 4.4887091  | 9.4628505  | 328.9030935 |
| C  | 5.5025360  | 10.3355924 | 328.4800600 |
| C  | 5.7985281  | 10.4551483 | 327.1120228 |
| H  | 5.2968027  | 9.7885122  | 325.1011818 |
| H  | 3.4892002  | 8.2558388  | 325.8510743 |
| C  | 2.6271008  | 7.8253825  | 328.4944815 |
| H  | 4.2564483  | 9.3666676  | 329.9762240 |
| H  | 6.0632258  | 10.9243824 | 329.2221517 |
| H  | 6.5924568  | 11.1395750 | 326.7752760 |
| O  | 2.9179925  | 6.4167731  | 328.5354938 |
| C  | 0.0586674  | 0.9708542  | 329.3262438 |
| C  | 0.8716239  | -0.0978664 | 329.7325992 |
| C  | 0.3732921  | -0.9534366 | 330.7828602 |
| C  | 1.1791275  | -1.9471538 | 331.4161703 |
| C  | -0.9822824 | -0.7762294 | 331.2462018 |
| C  | -1.4898675 | -1.6386343 | 332.2644708 |
| C  | -1.7810919 | 0.2715822  | 330.7064292 |
| H  | -2.8196788 | 0.3786016  | 331.0534879 |
| C  | -1.2762328 | 1.1842568  | 329.7867683 |
| C  | 4.3304168  | 0.7182931  | 328.2800643 |
| C  | 4.7582306  | -0.5210470 | 327.8233593 |
| H  | 5.7259446  | -0.6066311 | 327.3054060 |
| C  | 3.9259846  | -1.6757151 | 327.9227611 |
| C  | 4.3484241  | -2.9258480 | 327.3784054 |
| C  | 2.6008328  | -1.5647717 | 328.4917783 |
| C  | 1.7356477  | -2.6963646 | 328.4050154 |
| C  | 2.2004965  | -0.3106767 | 329.0889533 |
| C  | 3.0849753  | 0.7624988  | 328.9774492 |
| O  | 0.5326627  | 1.8795394  | 328.3730895 |
| O  | 2.7516979  | 1.9705051  | 329.5788093 |
| P  | 1.6683211  | 2.9537997  | 328.8453838 |
| O  | 1.1956982  | 3.8873955  | 329.9746952 |
| O  | 2.1853596  | 3.6043664  | 327.5600383 |
| C  | -0.6883503 | -2.6142287 | 332.8376630 |
| C  | 0.6618607  | -2.7557363 | 332.4190339 |
| H  | -2.5298912 | -1.5000874 | 332.5991393 |
| H  | -1.0893879 | -3.2669681 | 333.6278884 |
| H  | 2.2286805  | -2.0608373 | 331.1109743 |
| H  | 1.3065266  | -3.5084504 | 332.8979676 |

|   |            |            |             |
|---|------------|------------|-------------|
| C | 2.1714998  | -3.8924061 | 327.8503134 |
| C | 3.4944592  | -4.0182109 | 327.3500104 |
| H | 0.7062027  | -2.6144724 | 328.7791158 |
| H | 1.4818362  | -4.7483613 | 327.7939561 |
| H | 3.8317532  | -4.9743526 | 326.9218964 |
| H | 5.3646313  | -2.9992199 | 326.9602566 |
| C | -2.4544842 | 3.3975184  | 330.1649055 |
| C | -2.0882220 | 2.3383368  | 329.2824694 |
| C | -3.2804210 | 4.4270830  | 329.6768685 |
| C | -2.5148718 | 2.3692432  | 327.9260409 |
| C | -3.3308572 | 3.4309568  | 327.4892994 |
| C | -3.7423608 | 4.4633273  | 328.3479237 |
| H | -3.5725532 | 5.2428424  | 330.3575282 |
| C | -2.1600457 | 1.2678582  | 326.9277300 |
| H | -3.6668018 | 3.4351011  | 326.4417474 |
| C | -1.3855877 | 1.8197290  | 325.7167894 |
| H | -2.0078629 | 2.5160515  | 325.1168985 |
| H | -1.0716101 | 0.9935659  | 325.0457388 |
| H | -0.4756012 | 2.3622873  | 326.0402171 |
| C | -3.4144404 | 0.4873331  | 326.4922118 |
| H | -1.4961512 | 0.5420482  | 327.4385066 |
| H | -4.1322762 | 1.1403052  | 325.9531459 |
| H | -3.9433992 | 0.0569646  | 327.3668491 |
| H | -3.1413472 | -0.3452420 | 325.8111751 |
| C | -4.6222907 | 5.6207423  | 327.8841773 |
| C | -3.7684437 | 6.8752037  | 327.6112235 |
| H | -4.4089093 | 7.7314737  | 327.3138821 |
| H | -3.0478457 | 6.6850796  | 326.7876753 |
| H | -3.1911081 | 7.1746882  | 328.5078603 |
| C | -5.5085795 | 5.2850953  | 326.6775563 |
| H | -5.2939383 | 5.8622267  | 328.7385682 |
| H | -6.2121791 | 6.1173330  | 326.4732417 |
| H | -6.1043423 | 4.3650666  | 326.8463067 |
| H | -4.9073517 | 5.1360583  | 325.7561511 |
| C | -1.9865555 | 3.4554637  | 331.6195754 |
| C | -1.4100111 | 4.8296195  | 331.9982290 |
| H | -0.9731005 | 4.8005956  | 333.0168085 |
| H | -2.1746624 | 5.6321066  | 331.9851326 |
| H | -0.6051536 | 5.1378316  | 331.3070425 |
| C | -3.1205923 | 3.0636682  | 332.5865728 |
| H | -1.1675593 | 2.7162739  | 331.7350400 |
| H | -2.7611959 | 3.0711980  | 333.6363711 |
| H | -3.5226497 | 2.0537117  | 332.3700392 |
| H | -3.9650971 | 3.7805447  | 332.5126804 |
| H | 5.5896463  | 6.5561148  | 326.2116635 |
| H | 7.7093795  | 3.1746650  | 330.5718291 |
| H | 5.1199781  | 0.4797055  | 323.7321528 |
| C | 6.3674409  | 6.0207058  | 326.8038931 |
| H | 5.1063656  | 3.0426357  | 332.4046048 |
| H | 7.0671712  | 7.9144912  | 327.6134638 |
| H | 2.7855786  | 1.4979005  | 323.8908685 |
| C | 5.7696822  | 4.6804413  | 327.2331200 |
| C | 7.1320461  | 2.2310055  | 330.6649222 |
| C | 6.7651618  | 6.9147936  | 327.9796519 |
| H | 7.6229901  | 6.4876756  | 328.5398149 |
| C | 5.8571325  | 4.2044791  | 328.5581044 |
| C | 5.4771498  | 1.1758686  | 324.5184669 |
| H | 7.2873806  | 5.2022792  | 324.9652216 |
| C | 5.2220665  | 3.8031885  | 326.2597732 |
| C | 7.5669073  | 5.7895744  | 325.8621030 |
| H | 7.9757797  | 6.7613286  | 325.5181572 |
| H | 5.1728185  | 4.1394007  | 325.2119469 |
| C | 5.0036369  | 3.4357550  | 331.3730204 |
| H | 7.2685762  | 1.8516015  | 331.6983487 |
| H | 7.5751191  | 1.4934708  | 329.9654584 |
| C | 5.4576372  | 2.9060443  | 328.9177404 |
| C | 3.1596776  | 2.2208504  | 324.6441341 |
| C | 4.8322910  | 2.4787632  | 326.5687610 |
| H | 6.2875167  | 0.6713524  | 325.0834666 |
| H | 5.9217075  | 2.0579760  | 324.0114125 |
| C | 5.6370645  | 2.4600471  | 330.3658481 |

|   |            |           |             |
|---|------------|-----------|-------------|
| C | 4.9493858  | 2.0312164 | 327.9162661 |
| C | 4.3131992  | 1.5901261 | 325.4403947 |
| H | 3.9228203  | 3.5750520 | 331.1755159 |
| H | 2.3196516  | 2.4956264 | 325.3109925 |
| H | 5.4900028  | 4.4328563 | 331.3531977 |
| H | 5.9250085  | 7.0608422 | 328.6847999 |
| H | 3.4673795  | 3.1378426 | 324.1018840 |
| H | 8.3767214  | 5.2431716 | 326.3893815 |
| H | 5.1282802  | 1.4817535 | 330.4821765 |
| H | 3.9138753  | 0.6655341 | 325.8992284 |
| H | 6.2678223  | 4.8624003 | 329.3352906 |
| H | 1.3795186  | 7.8340381 | 326.6933540 |
| H | 2.4791320  | 8.1420640 | 329.5533463 |
| H | 0.3195932  | 5.3651019 | 327.5009029 |
| H | -1.0437103 | 5.5763348 | 328.7935135 |

### 15d-ma

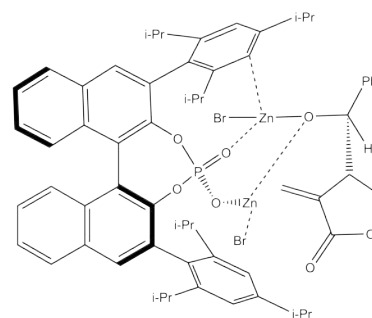

Energy (Hartree) = -11970.05071631

|    |            |            |             |
|----|------------|------------|-------------|
| Zn | 1.7753282  | 5.7535545  | 330.0454245 |
| Br | 1.9750513  | 6.9268099  | 332.0171803 |
| H  | 1.5730836  | 10.2258066 | 328.2296797 |
| Br | 2.6965598  | 5.9630183  | 324.8016725 |
| Zn | 3.1954526  | 5.2270691  | 326.9748158 |
| C  | 1.2634480  | 8.0727979  | 327.7469250 |
| C  | 0.7636789  | 9.5186707  | 327.9634410 |
| C  | 0.1538646  | 7.2827367  | 328.3822836 |
| C  | -0.1882265 | 5.9829927  | 328.2124853 |
| C  | -0.6136307 | 8.2084057  | 329.2898742 |
| O  | -0.1693125 | 9.4793703  | 329.0648409 |
| O  | -1.4929184 | 7.9390066  | 330.0774974 |
| H  | 0.2344233  | 9.9060406  | 327.0676955 |
| C  | 5.0793297  | 9.7192950  | 326.2128512 |
| C  | 4.0561783  | 8.8477139  | 326.6188635 |
| C  | 3.7425720  | 8.7027436  | 327.9855914 |
| C  | 4.4695730  | 9.4567113  | 328.9318027 |
| C  | 5.4856112  | 10.3348036 | 328.5263636 |
| C  | 5.7939245  | 10.4678122 | 327.1626288 |
| H  | 5.3134160  | 9.8174113  | 325.1415203 |
| H  | 3.5051082  | 8.2711337  | 325.8600358 |
| C  | 2.6146606  | 7.8204469  | 328.4918208 |
| H  | 4.2261600  | 9.3481204  | 330.0013117 |
| H  | 6.0380693  | 10.9180330 | 329.2788884 |
| H  | 6.5888412  | 11.1576647 | 326.8396604 |
| O  | 2.9158370  | 6.4141827  | 328.5363369 |
| C  | 0.0626167  | 0.9775023  | 329.3201706 |
| C  | 0.8723556  | -0.0939327 | 329.7260382 |
| C  | 0.3750063  | -0.9453880 | 330.7798647 |
| C  | 1.1783875  | -1.9423724 | 331.4106681 |
| C  | -0.9770194 | -0.7604620 | 331.2497416 |
| C  | -1.4830516 | -1.6183799 | 332.2719215 |
| C  | -1.7726453 | 0.2899271  | 330.7112368 |
| H  | -2.8091105 | 0.4042575  | 331.0621627 |
| C  | -1.2690651 | 1.1981534  | 329.7867901 |
| C  | 4.3334242  | 0.7088426  | 328.2718008 |

|   |            |            |             |
|---|------------|------------|-------------|
| C | 4.7556893  | -0.5325846 | 327.8158962 |
| H | 5.7236255  | -0.6212658 | 327.2986170 |
| C | 3.9193515  | -1.6840198 | 327.9146464 |
| C | 4.3359031  | -2.9361537 | 327.3715116 |
| C | 2.5951899  | -1.5675604 | 328.4843583 |
| C | 1.7262863  | -2.6962631 | 328.4001738 |
| C | 2.1993140  | -0.3117260 | 329.0802640 |
| C | 3.0870141  | 0.7589720  | 328.9678526 |
| O | 0.5373224  | 1.8808876  | 328.3631716 |
| O | 2.7575717  | 1.9676084  | 329.5665425 |
| P | 1.6761398  | 2.9543316  | 328.8328021 |
| O | 1.2041465  | 3.8900708  | 329.9579764 |
| O | 2.1995261  | 3.5949135  | 327.5445128 |
| C | -0.6845354 | -2.5973495 | 332.8422763 |
| C | 0.6620498  | -2.7468327 | 332.4167293 |
| H | -2.5202770 | -1.4729345 | 332.6122625 |
| H | -1.0850759 | -3.2463565 | 333.6357414 |
| H | 2.2254629  | -2.0615258 | 331.0994656 |
| H | 1.3052245  | -3.5023423 | 332.8931587 |
| C | 2.1572366  | -3.8942530 | 327.8469661 |
| C | 3.4785532  | -4.0252719 | 327.3451725 |
| H | 0.6981667  | -2.6090588 | 328.7765222 |
| H | 1.4645427  | -4.7478479 | 327.7929318 |
| H | 3.8121878  | -4.9829394 | 326.9177243 |
| H | 5.3514572  | -3.0136826 | 326.9524625 |
| C | -2.4400471 | 3.4160826  | 330.1613363 |
| C | -2.0823862 | 2.3511540  | 329.2824710 |
| C | -3.2730775 | 4.4402940  | 329.6748318 |
| C | -2.5223388 | 2.3720061  | 327.9304731 |
| C | -3.3455054 | 3.4284648  | 327.4955589 |
| C | -3.7509300 | 4.4649539  | 328.3515522 |
| H | -3.5557253 | 5.2624604  | 330.3515058 |
| C | -2.1736049 | 1.2654999  | 326.9356982 |
| H | -3.6923379 | 3.4248037  | 326.4516143 |
| C | -1.4064707 | 1.8114253  | 325.7175844 |
| H | -2.0312768 | 2.5063607  | 325.1188734 |
| H | -1.0973932 | 0.9829864  | 325.0471344 |
| H | -0.4940051 | 2.3547273  | 326.0322590 |
| C | -3.4299257 | 0.4816655  | 326.5124932 |
| H | -1.5059551 | 0.5428196  | 327.4461751 |
| H | -4.1524759 | 1.1306552  | 325.9751444 |
| H | -3.9531431 | 0.0561470  | 327.3927105 |
| H | -3.1616499 | -0.3543595 | 325.8337995 |
| C | -4.6407126 | 5.6154965  | 327.8896805 |
| C | -3.7964411 | 6.8725896  | 327.6005640 |
| H | -4.4438042 | 7.7228469  | 327.3009486 |
| H | -3.0815988 | 6.6795245  | 326.7727142 |
| H | -3.2144139 | 7.1830412  | 328.4902410 |
| C | -5.5384272 | 5.2676793  | 326.6951179 |
| H | -5.3050074 | 5.8584588  | 328.7494752 |
| H | -6.2498191 | 6.0938501  | 326.4934862 |
| H | -6.1260475 | 4.3446173  | 326.8746792 |
| H | -4.9468217 | 5.1183840  | 325.7675696 |
| C | -1.9529730 | 3.4868202  | 331.6092031 |
| C | -1.3835336 | 4.8680200  | 331.9724264 |
| H | -0.9204695 | 4.8469735  | 332.9792412 |
| H | -2.1552804 | 5.6635231  | 331.9759937 |
| H | -0.5994460 | 5.1853610  | 331.2621323 |
| C | -3.0703716 | 3.0926383  | 332.5943118 |
| H | -1.1262036 | 2.7551273  | 331.7176065 |
| H | -2.6980713 | 3.1141431  | 333.6393162 |
| H | -3.4657076 | 2.0768787  | 332.3935238 |
| H | -3.9230987 | 3.7999230  | 332.5246359 |
| H | 5.5865038  | 6.5455306  | 326.2215336 |
| H | 7.7089569  | 3.1551284  | 330.5789478 |
| H | 5.1473993  | 0.5002945  | 323.7028918 |
| C | 6.3674929  | 6.0172111  | 326.8160248 |
| H | 5.1007378  | 3.0231826  | 332.4042739 |
| H | 7.0405070  | 7.9166753  | 327.6376249 |
| H | 2.8030599  | 1.4902800  | 323.8864647 |
| C | 5.7813384  | 4.6692251  | 327.2368158 |

|   |            |           |             |
|---|------------|-----------|-------------|
| C | 7.1298272  | 2.2123319 | 330.6689808 |
| C | 6.7483977  | 6.9116326 | 327.9971374 |
| H | 7.6085156  | 6.4932360 | 328.5605850 |
| C | 5.8627028  | 4.1910226 | 328.5609580 |
| C | 5.5005453  | 1.1940660 | 324.4931134 |
| H | 7.3064742  | 5.2169566 | 324.9792681 |
| C | 5.2454405  | 3.7916133 | 326.2591408 |
| C | 7.5740657  | 5.8046710 | 325.8794213 |
| H | 7.9730681  | 6.7822063 | 325.5403318 |
| H | 5.1932118  | 4.1331910 | 325.2132959 |
| C | 4.9995946  | 3.4167230 | 331.3727322 |
| H | 7.2641584  | 1.8314488 | 331.7021589 |
| H | 7.5750009  | 1.4760527 | 329.9696764 |
| C | 5.4630779  | 2.8918543 | 328.9166344 |
| C | 3.1697636  | 2.2062272 | 324.6499992 |
| C | 4.8543255  | 2.4673803 | 326.5629977 |
| H | 6.3235594  | 0.6964734 | 325.0459752 |
| H | 5.9289343  | 2.0860413 | 323.9895696 |
| C | 5.6362462  | 2.4436739 | 330.3651983 |
| C | 4.9604305  | 2.0185768 | 327.9111854 |
| C | 4.3393119  | 1.5828105 | 325.4290509 |
| H | 3.9189947  | 3.5544789 | 331.1746590 |
| H | 2.3292036  | 2.4544427 | 325.3261945 |
| H | 5.4832101  | 4.4151899 | 331.3565855 |
| H | 5.9026345  | 7.0448994 | 328.6980575 |
| H | 3.4559734  | 3.1385646 | 324.1224232 |
| H | 8.3884714  | 5.2660397 | 326.4075728 |
| H | 5.1261859  | 1.4654590 | 330.4772923 |
| H | 3.9570631  | 0.6475935 | 325.8808639 |
| H | 6.2655982  | 4.8492503 | 329.3418881 |
| H | 1.3913978  | 7.8157621 | 326.6755013 |
| H | 2.4498445  | 8.1353108 | 329.5488068 |
| H | 0.3294329  | 5.3453987 | 327.4798600 |
| H | -1.0472892 | 5.5570278 | 328.7573663 |

### 15d-mi; COSMO

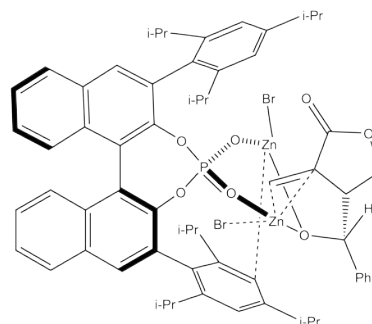

Energy (Hartree) = -11970.05915017

|   |            |            |             |
|---|------------|------------|-------------|
| C | -0.0751391 | 0.8159666  | 268.9823082 |
| C | 0.6899120  | -0.2311466 | 269.4987993 |
| C | 0.0859888  | -1.0616072 | 270.5168811 |
| C | 0.8117744  | -2.0509770 | 271.2459279 |
| C | -1.3094779 | -0.8676634 | 270.8393747 |
| C | -1.9298009 | -1.7216577 | 271.8004895 |
| C | -2.0221434 | 0.2284527  | 270.2704769 |
| H | -3.0581278 | 0.4134882  | 270.5939399 |
| C | -1.4047584 | 1.1217456  | 269.4048468 |
| C | 4.3686634  | 0.5222865  | 268.6466866 |
| C | 4.8335907  | -0.7576538 | 268.3620794 |
| H | 5.9017308  | -0.8974101 | 268.1358768 |
| C | 3.9639957  | -1.8801708 | 268.2833251 |
| C | 4.4465885  | -3.1608527 | 267.8763213 |
| C | 2.5610184  | -1.7099655 | 268.5703033 |
| C | 1.6917814  | -2.8225529 | 268.3554820 |
| C | 2.0886505  | -0.4219227 | 269.0236725 |
| C | 2.9867183  | 0.6575429  | 268.9887324 |
| O | 0.4632801  | 1.6156747  | 267.9855040 |

|   |            |            |             |    |            |            |             |
|---|------------|------------|-------------|----|------------|------------|-------------|
| O | 2.5580957  | 1.9343753  | 269.3655962 | C  | 4.4073597  | 3.2350695  | 271.7604708 |
| P | 1.5579460  | 2.7776261  | 268.3863894 | H  | 5.9293958  | 1.2428658  | 272.9798457 |
| O | 0.9319801  | 3.8787346  | 269.2564688 | H  | 6.8128599  | 0.6777970  | 271.5215361 |
| O | 2.1811147  | 3.1620608  | 267.0406655 | C  | 5.6595685  | 2.4344766  | 269.7025201 |
| C | -1.2029618 | -2.7021836 | 272.4589320 | C  | 4.8137613  | 2.2700405  | 264.9041716 |
| C | 0.1839235  | -2.8507111 | 272.1916318 | C  | 5.7734929  | 2.0917447  | 267.2639277 |
| H | -2.9970943 | -1.5696801 | 272.0258620 | H  | 7.0415022  | -0.1290524 | 266.1787056 |
| H | -1.6920134 | -3.3492626 | 273.2029010 | H  | 7.4471974  | 1.2683437  | 265.1399217 |
| H | 1.8869307  | -2.1738605 | 271.0578993 | C  | 5.1588771  | 2.0663867  | 271.0972200 |
| H | 0.7695135  | -3.6025837 | 272.7423209 | C  | 5.2752393  | 1.7086547  | 268.5424651 |
| C | 2.1875485  | -4.0495281 | 267.9359925 | C  | 5.4141922  | 1.3472325  | 265.9763229 |
| C | 3.5789724  | -4.2297733 | 267.7121145 | H  | 3.6016043  | 3.6127154  | 271.1030057 |
| H | 0.6114824  | -2.6984339 | 268.5121246 | H  | 3.8939986  | 2.7603863  | 265.2724251 |
| H | 1.4939025  | -4.8877423 | 267.7690116 | H  | 5.0890532  | 4.0841529  | 271.9761104 |
| H | 3.9612661  | -5.2101905 | 267.3894812 | H  | 6.3584485  | 6.4946246  | 267.5269514 |
| H | 5.5232307  | -3.2759096 | 267.6748196 | H  | 5.5270108  | 3.0566785  | 264.5794962 |
| C | -1.9988572 | 3.4347723  | 270.1316018 | H  | 8.7836076  | 5.2021741  | 270.2223805 |
| C | -1.9451917 | 2.4762646  | 269.0783389 | H  | 4.4386643  | 1.2302344  | 270.9903774 |
| C | -2.3715738 | 4.7582418  | 269.8150716 | H  | 4.6311952  | 0.6029593  | 266.2230065 |
| C | -2.2341946 | 2.8675671  | 267.7400406 | H  | 6.8334436  | 4.0770354  | 270.4685359 |
| C | -2.5921759 | 4.2032926  | 267.4740941 | Zn | -0.0189962 | 5.5665744  | 268.9021203 |
| C | -2.6966091 | 5.1669478  | 268.4985991 | Br | -0.2275793 | 7.4773146  | 270.2629523 |
| C | -2.2307232 | 1.8638127  | 266.5908345 | C  | 0.2061705  | 9.3747751  | 263.5761466 |
| H | -2.8353054 | 4.4934042  | 266.4410954 | C  | 0.7228140  | 9.0026194  | 264.8253961 |
| C | -1.3726270 | 2.3261223  | 265.4024446 | C  | 0.4445927  | 7.7322595  | 265.3755036 |
| H | -1.7687990 | 3.2494559  | 264.9306039 | C  | -0.3854806 | 6.8582480  | 264.6490938 |
| H | -1.3456343 | 1.5468634  | 264.6143085 | C  | -0.8982640 | 7.2240080  | 263.3947247 |
| H | -0.3261906 | 2.5185861  | 265.7079424 | C  | -0.6027003 | 8.4821347  | 262.8513347 |
| C | -3.6764710 | 1.5494673  | 266.1581169 | H  | 0.4367236  | 10.3701277 | 263.1660184 |
| H | -1.7915821 | 0.9197356  | 266.9717856 | C  | 0.9491475  | 7.3528759  | 266.7667472 |
| H | -4.1815830 | 2.4531248  | 265.7570079 | H  | -0.6363000 | 5.8773818  | 265.0749944 |
| H | -4.2801257 | 1.1752225  | 267.0097052 | H  | -1.5292255 | 6.5129932  | 262.8400744 |
| H | -3.6854556 | 0.7762382  | 265.3627299 | H  | -1.0025434 | 8.7708141  | 261.8671797 |
| C | -3.3176145 | 6.5421716  | 268.2857844 | O  | 0.6925182  | 5.9831030  | 267.0736606 |
| C | -2.9644557 | 7.1998981  | 266.9501607 | C  | 2.4744692  | 7.7230282  | 266.9911081 |
| H | -3.4033488 | 8.2158954  | 266.8925087 | C  | 3.3508017  | 6.5038608  | 266.9070558 |
| H | -3.3502048 | 6.6278724  | 266.0809617 | C  | 3.5451831  | 6.0094618  | 268.3210670 |
| H | -1.8705715 | 7.2979146  | 266.8246107 | O  | 3.1427972  | 6.9958156  | 269.1694131 |
| C | -4.8450867 | 6.4309222  | 268.4721970 | C  | 2.7873999  | 8.1882467  | 268.4292824 |
| H | -2.9222133 | 7.1927387  | 269.0959211 | O  | 3.9671342  | 4.9403635  | 268.6976262 |
| H | -5.3192752 | 7.4310902  | 268.3989116 | C  | 3.9134387  | 5.8863495  | 265.8376851 |
| H | -5.1037993 | 5.9979635  | 269.4594235 | H  | 3.6532583  | 8.8826194  | 268.4501616 |
| H | -5.2914273 | 5.7816616  | 267.6899445 | H  | 1.9249274  | 8.6489196  | 268.9459955 |
| C | -1.6745238 | 3.1104575  | 271.5893749 | Zn | 1.7172232  | 4.7096857  | 265.9275717 |
| C | -0.6153826 | 4.0487612  | 272.1940910 | Br | 1.6523821  | 4.2001970  | 263.6561451 |
| H | -0.3936759 | 3.7422048  | 273.2366648 | H  | 1.3398967  | 9.7257344  | 265.3821639 |
| H | -0.9493546 | 5.1062294  | 272.2223316 | H  | -2.4624909 | 5.4968352  | 270.6259684 |
| H | 0.3273590  | 4.0061079  | 271.6145029 | H  | 2.7724492  | 8.4928067  | 266.2564038 |
| C | -2.9645539 | 3.0990499  | 272.4324821 | H  | 0.3779212  | 7.9695925  | 267.5001404 |
| H | -1.2499167 | 2.0890776  | 271.6225866 | H  | 3.8094563  | 6.2800880  | 264.8151180 |
| H | -2.7421766 | 2.8049845  | 273.4787136 | H  | 4.5498043  | 4.9998995  | 266.0044621 |
| H | -3.7126721 | 2.3876540  | 272.0269652 |    |            |            |             |
| H | -3.4371696 | 4.1033763  | 272.4577455 |    |            |            |             |
| H | 8.3846247  | 5.1043692  | 267.1546109 |    |            |            |             |
| H | 7.0771773  | 2.3359371  | 272.1449314 |    |            |            |             |
| H | 6.3500242  | -0.0094482 | 264.5261728 |    |            |            |             |
| C | 7.9577601  | 5.1349632  | 268.1817972 |    |            |            |             |
| H | 3.9607245  | 2.9124175  | 272.7239628 |    |            |            |             |
| H | 7.8018517  | 7.3283550  | 268.1933835 |    |            |            |             |
| H | 4.5361713  | 1.6896060  | 264.0005206 |    |            |            |             |
| C | 7.0494272  | 3.9187248  | 268.3183246 |    |            |            |             |
| C | 6.3083955  | 1.5512630  | 271.9831520 |    |            |            |             |
| C | 7.1460273  | 6.4395787  | 268.3046613 |    |            |            |             |
| H | 6.6434927  | 6.5029825  | 269.2922670 |    |            |            |             |
| C | 6.5449855  | 3.5163475  | 269.5658416 |    |            |            |             |
| C | 6.6290200  | 0.5749865  | 265.4275100 |    |            |            |             |
| H | 9.7178220  | 4.1774828  | 269.0883745 |    |            |            |             |
| C | 6.6491120  | 3.1916400  | 267.1854623 |    |            |            |             |
| C | 9.1332817  | 5.1159397  | 269.1725426 |    |            |            |             |
| H | 9.8190100  | 5.9677390  | 268.9843795 |    |            |            |             |
| H | 7.0409959  | 3.4946514  | 266.1998309 |    |            |            |             |

### 15d-mi

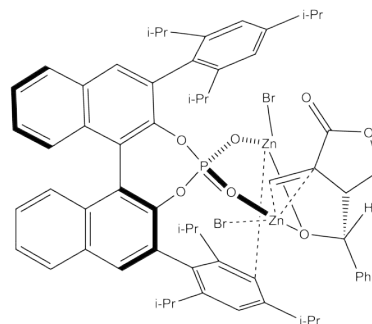

Energy (Hartree) = -11970.0479892

|   |            |            |             |
|---|------------|------------|-------------|
| C | -0.0711232 | 0.8180293  | 268.9964521 |
| C | 0.6960595  | -0.2252009 | 269.5178862 |
| C | 0.0946105  | -1.0514001 | 270.5406269 |
| C | 0.8234773  | -2.0346652 | 271.2744344 |

|   |            |            |             |    |            |            |             |
|---|------------|------------|-------------|----|------------|------------|-------------|
| C | -1.3010981 | -0.8601232 | 270.8625095 | C  | 7.9806738  | 5.1138976  | 268.1511124 |
| C | -1.9174810 | -1.7104899 | 271.8287111 | H  | 4.0051295  | 2.9168832  | 272.7255326 |
| C | -2.0171971 | 0.2287932  | 270.2850327 | H  | 7.8325687  | 7.3087834  | 268.1523098 |
| H | -3.0546548 | 0.4118461  | 270.6050610 | H  | 4.4943581  | 1.6960528  | 264.0015042 |
| C | -1.4032603 | 1.1195041  | 269.4144882 | C  | 7.0670176  | 3.9027274  | 268.2961125 |
| C | 4.3712448  | 0.5229884  | 268.6475837 | C  | 6.3396175  | 1.5427176  | 271.9675751 |
| C | 4.8335785  | -0.7584713 | 268.3667709 | C  | 7.1747648  | 6.4223522  | 268.2709481 |
| H | 5.9007410  | -0.8976546 | 268.1357431 | H  | 6.6771112  | 6.4921330  | 269.2605632 |
| C | 3.9640679  | -1.8811865 | 268.2981388 | C  | 6.5705884  | 3.5040809  | 269.5475696 |
| C | 4.4435218  | -3.1641034 | 267.8961777 | C  | 6.5963670  | 0.5654942  | 265.4056199 |
| C | 2.5629188  | -1.7088575 | 268.5914991 | H  | 9.7381261  | 4.1517720  | 269.0562194 |
| C | 1.6927816  | -2.8225169 | 268.3876689 | C  | 6.6519794  | 3.1790907  | 267.1668067 |
| C | 2.0933578  | -0.4182437 | 269.0402030 | C  | 9.1602675  | 5.0943741  | 269.1365648 |
| C | 2.9912340  | 0.6609635  | 268.9958683 | H  | 9.8506933  | 5.9406629  | 268.9410951 |
| O | 0.4653617  | 1.6162599  | 267.9988027 | H  | 7.0381493  | 3.6789439  | 266.1779306 |
| O | 2.5653296  | 1.9392999  | 269.3698383 | C  | 4.4449845  | 3.2359535  | 271.7579081 |
| P | 1.5580554  | 2.7807603  | 268.3965064 | H  | 5.9668014  | 1.2367436  | 272.9672590 |
| O | 0.9302056  | 3.8770791  | 269.2731069 | H  | 6.8365070  | 0.6670450  | 271.5024185 |
| O | 2.1735816  | 3.1754202  | 267.0513986 | C  | 5.6791289  | 2.4285203  | 269.6918060 |
| C | -1.1878080 | -2.6847919 | 272.4920851 | C  | 4.7855029  | 2.2718994  | 264.9035327 |
| C | 0.1987613  | -2.8308529 | 272.2244961 | C  | 5.7696616  | 2.0856800  | 267.2522078 |
| H | -2.9851324 | -1.5604661 | 272.0537788 | H  | 7.0127764  | -0.1418672 | 266.1513895 |
| H | -1.6746353 | -3.3288686 | 273.2400412 | H  | 7.4166750  | 1.2532615  | 265.1112372 |
| H | 1.8985992  | -2.1548380 | 271.0848678 | C  | 5.1864947  | 2.0636954  | 271.0900733 |
| H | 0.7869576  | -3.5780385 | 272.7786469 | C  | 5.2806039  | 1.7061292  | 268.5349606 |
| C | 2.1860547  | -4.0518551 | 267.9736270 | C  | 5.3923241  | 1.3445454  | 265.9679078 |
| C | 3.5755930  | -4.2337384 | 267.7433532 | H  | 3.6347089  | 3.6163679  | 271.1077899 |
| H | 0.6135968  | -2.6965796 | 268.5496014 | H  | 3.8713864  | 2.7651149  | 265.2812913 |
| H | 1.4911555  | -4.8907153 | 267.8156746 | H  | 5.1303201  | 4.0835401  | 271.9671572 |
| H | 3.9562634  | -5.2159729 | 267.4245485 | H  | 6.3829972  | 6.4755681  | 267.4973248 |
| H | 5.5189676  | -3.2800629 | 267.6890866 | H  | 5.4991478  | 3.0552800  | 264.5717921 |
| C | -2.0225547 | 3.4346413  | 270.1162827 | H  | 8.8160982  | 5.1888873  | 270.1873665 |
| C | -1.9532303 | 2.4662085  | 269.0729200 | H  | 4.4614917  | 1.2309441  | 270.9883755 |
| C | -2.4030256 | 4.7515642  | 269.7836864 | H  | 4.6072692  | 0.6049429  | 266.2221000 |
| C | -2.2377761 | 2.8416841  | 267.7294452 | H  | 6.8705273  | 4.0622229  | 270.4480122 |
| C | -2.6064912 | 4.1713990  | 267.4488765 | Zn | -0.0065294 | 5.5681614  | 268.9164674 |
| C | -2.7236970 | 5.1439299  | 268.4620585 | Br | -0.2869611 | 7.4813359  | 270.2503037 |
| C | -2.2176034 | 1.8275834  | 266.5890922 | C  | 0.2101737  | 9.4779284  | 263.6670416 |
| H | -2.8425717 | 4.4495376  | 266.4110446 | C  | 0.7095688  | 9.0713073  | 264.9117974 |
| C | -1.3530425 | 2.2838277  | 265.4029700 | C  | 0.4523811  | 7.7749692  | 265.4091482 |
| H | -1.7467898 | 3.2033950  | 264.9218981 | C  | -0.3415161 | 6.9101358  | 264.6342992 |
| H | -1.3193250 | 1.5002623  | 264.6194948 | C  | -0.8352972 | 7.3100961  | 263.3828099 |
| H | -0.3083823 | 2.4787851  | 265.7121606 | C  | -0.5597769 | 8.5935060  | 262.8923994 |
| C | -3.6576066 | 1.4983462  | 266.1487363 | H  | 0.4232523  | 10.4935240 | 263.2995540 |
| H | -1.7748321 | 0.8903043  | 266.9825230 | C  | 0.9440685  | 7.3616345  | 266.7950579 |
| H | -4.1673508 | 2.3940016  | 265.7358775 | H  | -0.5790194 | 5.9087145  | 265.0169972 |
| H | -4.2651989 | 1.1279297  | 266.9990742 | H  | -1.4337153 | 6.6033628  | 262.7884448 |
| H | -3.6562370 | 0.7180417  | 265.3602576 | H  | -0.9450489 | 8.9083927  | 261.9106229 |
| C | -3.3395006 | 6.5182246  | 268.2306193 | O  | 0.6840840  | 5.9890362  | 267.0777607 |
| C | -3.0071780 | 7.1424171  | 266.8738829 | C  | 2.4690057  | 7.7266702  | 267.0361608 |
| H | -3.4278059 | 8.1653656  | 266.8048607 | C  | 3.3496973  | 6.5130369  | 266.9213570 |
| H | -3.4257459 | 6.5615193  | 266.0257026 | C  | 3.5549951  | 5.9890910  | 268.3229347 |
| H | -1.9152800 | 7.2166705  | 266.7193469 | O  | 3.1332828  | 6.9463834  | 269.1966363 |
| C | -4.8636767 | 6.4256169  | 268.4497074 | C  | 2.7739976  | 8.1534380  | 268.4890772 |
| H | -2.9217940 | 7.1838431  | 269.0173755 | O  | 3.9959763  | 4.9190583  | 268.6722143 |
| H | -5.3321141 | 7.4273136  | 268.3615594 | C  | 3.8958122  | 5.9117947  | 265.8345645 |
| H | -5.1071211 | 6.0186193  | 269.4516638 | H  | 3.6359840  | 8.8531231  | 268.5319222 |
| H | -5.3313775 | 5.7611526  | 267.6931689 | H  | 1.9066515  | 8.5945997  | 269.0155390 |
| C | -1.7078882 | 3.1264017  | 271.5799109 | Zn | 1.7004782  | 4.7097297  | 265.9253311 |
| C | -0.6593081 | 4.0756742  | 272.1855316 | Br | 1.6495981  | 4.2256242  | 263.6564146 |
| H | -0.4469594 | 3.7819658  | 273.2337048 | H  | 1.2956328  | 9.7878679  | 265.5096122 |
| H | -0.9956363 | 5.1325857  | 272.1988453 | H  | -2.5003641 | 5.4987025  | 270.5859920 |
| H | 0.2904902  | 4.0299895  | 271.6181378 | H  | 2.7655969  | 8.5168503  | 266.3221735 |
| C | -3.0049357 | 3.1157333  | 272.4120806 | H  | 0.3687412  | 7.9662550  | 267.5358919 |
| H | -1.2783213 | 2.1075722  | 271.6262801 | H  | 3.7712210  | 6.3159402  | 264.8184213 |
| H | -2.7913675 | 2.8319165  | 273.4629433 | H  | 4.5322470  | 5.0212700  | 265.9779526 |
| H | -3.7469984 | 2.3980755  | 272.0064063 |    |            |            |             |
| H | -3.4831250 | 4.1175603  | 272.4249869 |    |            |            |             |
| H | 8.4036698  | 5.0765796  | 267.1223859 |    |            |            |             |
| H | 7.1141035  | 2.3227539  | 272.1235518 |    |            |            |             |
| H | 6.3050869  | -0.0157694 | 264.5062382 |    |            |            |             |

15d-2-ma; COSMO

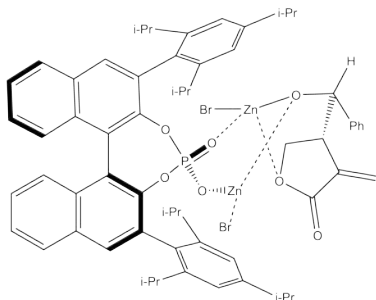

Energy (Hartree) = -11970.05561939

|    |            |            |            |
|----|------------|------------|------------|
| Zn | 2.3618058  | 1.5865726  | -0.0755405 |
| Br | 4.5391680  | 1.7365844  | -0.8271307 |
| H  | 3.5651865  | 3.9559492  | 0.7405231  |
| Br | -3.0167941 | 3.4249769  | -0.1592142 |
| Zn | -0.9577673 | 2.4739984  | -0.5833715 |
| C  | 1.5007853  | 4.8331407  | 0.6968965  |
| C  | 2.6967296  | 4.1644325  | 1.3959699  |
| C  | 0.3849407  | 4.3551414  | 1.5951120  |
| C  | -0.8088297 | 4.8955425  | 1.9100761  |
| C  | 0.7893353  | 3.0035892  | 2.0704804  |
| O  | 2.1763910  | 2.8718985  | 1.8512782  |
| O  | 0.1258453  | 2.0923072  | 2.4998915  |
| H  | 3.0303645  | 4.7366184  | 2.2849967  |
| C  | -1.2090377 | 6.8678917  | -2.1207602 |
| C  | -0.2031509 | 6.2907195  | -1.3294994 |
| C  | 0.2496276  | 4.9820417  | -1.5853600 |
| C  | -0.3141764 | 4.2781653  | -2.6768120 |
| C  | -1.3172617 | 4.8569331  | -3.4684758 |
| C  | -1.7746361 | 6.1527014  | -3.1883066 |
| H  | -1.5597295 | 7.8861359  | -1.8930752 |
| H  | 0.2196618  | 6.8770950  | -0.5011374 |
| C  | 1.3070770  | 4.2688088  | -0.7488175 |
| H  | 0.0538477  | 3.2687701  | -2.9228998 |
| H  | -1.7430620 | 4.2876915  | -4.3089640 |
| H  | -2.5692964 | 6.6059140  | -3.7998219 |
| O  | 0.9710835  | 2.8755775  | -0.6935016 |
| C  | -0.4625459 | -2.4698361 | 1.6597810  |
| C  | -0.6106685 | -3.6002017 | 0.8435112  |
| C  | -0.1905754 | -4.8740891 | 1.3816653  |
| C  | -0.1164492 | -0.6639543 | 0.5951879  |
| C  | 0.2107605  | -4.9506492 | 2.7662496  |
| C  | 0.5859589  | -6.2128879 | 3.3180588  |
| C  | 0.2757006  | -3.7623072 | 3.5474180  |
| H  | 0.5854399  | -3.8354306 | 4.6009220  |
| C  | 0.0042593  | -2.5099890 | 3.0083539  |
| C  | -0.8525055 | -2.3996624 | -2.8031703 |
| C  | -1.8071867 | -3.2680323 | -3.3194902 |
| H  | -2.0651264 | -3.2173984 | -4.3884220 |
| C  | -2.5098412 | -4.1898751 | -2.4879730 |
| C  | -3.5540708 | -5.0058287 | -3.0189251 |
| C  | -2.2007510 | -4.2729380 | -1.0786041 |
| C  | -3.0021521 | -5.1225623 | -0.2589488 |
| C  | -1.1185995 | -3.4739215 | -0.5544288 |
| C  | -0.5274599 | -2.5497453 | -1.4188924 |
| O  | -0.8351593 | -1.2163123 | 1.1739769  |
| O  | 0.4844383  | -1.7336367 | -0.9281837 |
| P  | 0.0785955  | -0.4817244 | 0.0392605  |
| O  | 1.4277520  | 0.0213570  | 0.5753152  |
| O  | -0.8528063 | 0.5195891  | -0.6557843 |
| C  | 0.6108598  | -7.3558806 | 2.5335460  |
| C  | 0.2740241  | -7.2723835 | 1.1560794  |
| H  | 0.8757265  | -6.2552119 | 4.3798040  |
| H  | 0.9095104  | -8.3215769 | 2.9691014  |
| H  | -0.3615813 | -6.0173656 | -0.4744736 |
| H  | 0.3286197  | -8.1721129 | 0.5242639  |
| C  | -4.0243804 | -5.8877274 | -0.8043151 |

|   |            |            |            |
|---|------------|------------|------------|
| C | -4.2944243 | -5.8437474 | -2.1981420 |
| H | -2.8076485 | -5.1600788 | 0.8220198  |
| H | -4.6331486 | -6.5295371 | -0.1492912 |
| H | -5.1013585 | -6.4614982 | -2.6209081 |
| H | -3.7726531 | -4.9425980 | -4.0965715 |
| C | 1.5470453  | -0.8107031 | 4.0578300  |
| C | 0.2181232  | -1.2599228 | 3.8091656  |
| C | 1.7351831  | 0.2887224  | 4.9120401  |
| C | -0.8837081 | -0.5477703 | 4.3490946  |
| C | -0.6382060 | 0.5514276  | 5.1937173  |
| C | 0.6620857  | 0.9784791  | 5.5031710  |
| H | 2.7604458  | 0.6382203  | 5.1155269  |
| C | -2.3279641 | -0.9217863 | 4.0253856  |
| H | -1.4996045 | 1.0956423  | 5.6096510  |
| C | -3.0359590 | 0.2139133  | 3.2613393  |
| H | -3.1319166 | 1.1243491  | 3.8891943  |
| H | -4.0586420 | -0.0951171 | 2.9606898  |
| H | -2.4762822 | 0.4956664  | 2.3486176  |
| C | -3.1103044 | -1.3347055 | 5.2847966  |
| H | -2.3069388 | -1.8058491 | 3.3556688  |
| H | -3.1919469 | -0.4951305 | 6.0065822  |
| H | -2.6153870 | -2.1790385 | 5.8068666  |
| H | -4.1415388 | -1.6498254 | 5.0219183  |
| C | 0.9418163  | 2.1996756  | 6.3740256  |
| C | 1.1268358  | 3.4555530  | 5.4977757  |
| H | 1.4010604  | 4.3365027  | 6.1150772  |
| H | 0.1879511  | 3.6929836  | 4.9557282  |
| H | 1.9220936  | 3.3012873  | 4.7406522  |
| C | -0.1112246 | 2.4436117  | 7.4636126  |
| H | 1.9136520  | 2.0086728  | 6.8823721  |
| H | 0.2077669  | 3.2657299  | 8.1362878  |
| H | -0.2776249 | 1.5377755  | 8.0810116  |
| H | -1.0888442 | 2.7404450  | 7.0293545  |
| C | 2.7622347  | -1.4664169 | 3.3992763  |
| C | 3.7712941  | -0.4312240 | 2.8684933  |
| H | 4.5061945  | -0.9146994 | 2.1933283  |
| H | 4.3442577  | 0.0468455  | 3.6902457  |
| H | 3.2632763  | 0.3715286  | 2.3033732  |
| C | 3.4659864  | -2.4593676 | 4.3435926  |
| H | 2.3887902  | -2.0353760 | 2.5222619  |
| H | 4.3412611  | -2.9246114 | 3.8441636  |
| H | 2.7894119  | -3.2733172 | 4.6696419  |
| H | 3.8307243  | -1.9405596 | 5.2552117  |
| H | 0.8857934  | 3.0718723  | -5.3067264 |
| H | 3.2080911  | -2.4103841 | -5.2588375 |
| H | -4.2618999 | -0.4622324 | -5.2718833 |
| C | 1.6791083  | 2.2957898  | -5.2240645 |
| H | 3.8576985  | -2.8967488 | -2.1516814 |
| H | 3.1411414  | 3.8214547  | -4.6327080 |
| H | -4.2310832 | 1.0012752  | -3.1903970 |
| C | 1.0166540  | 1.0434340  | -4.6644042 |
| C | 2.5878488  | -3.0947519 | -4.6427529 |
| C | 2.7690833  | 2.8368633  | -4.2825129 |
| H | 3.6397001  | 2.1521671  | -4.2245713 |
| C | 1.7821011  | -0.0627372 | -4.2544717 |
| C | -3.1555089 | -0.3960796 | -5.3275864 |
| H | 1.4373732  | 1.7046050  | -7.3300880 |
| C | -0.3796258 | 0.9467116  | -4.5525601 |
| C | 2.2332104  | 2.0500370  | -6.6397506 |
| H | 2.6766397  | 2.9771792  | -7.0586613 |
| H | -0.9950053 | 1.7934713  | -4.8987512 |
| C | 3.2825691  | -1.9974912 | -2.4537181 |
| H | 3.2049618  | -3.9843139 | -4.3987705 |
| H | 1.7338953  | -3.4281874 | -5.2669754 |
| C | 1.1971498  | -1.2184703 | -3.7116489 |
| C | -3.1256622 | 1.0669546  | -3.2524408 |
| C | -1.0215147 | -0.1825625 | -4.0046020 |
| H | -2.7780493 | -1.3250132 | -5.8019183 |
| H | -2.8998642 | 0.4471350  | -6.0033113 |
| C | 2.1026817  | -2.3970522 | -3.3564845 |
| C | -0.2199876 | -1.2736552 | -3.5596891 |

|   |            |            |            |
|---|------------|------------|------------|
| C | -2.5482997 | -0.1863972 | -3.9267053 |
| H | 2.9316687  | -1.4906835 | -1.5342225 |
| H | -2.7477511 | 1.1728385  | -2.2182076 |
| H | 3.9887624  | -1.3134918 | -2.9680729 |
| H | 2.3906715  | 2.9543161  | -3.2477804 |
| H | -2.8866462 | 1.9995448  | -3.8042690 |
| H | 3.0263314  | 1.2733184  | -6.6239611 |
| H | 1.4962152  | -3.1399739 | -2.8000982 |
| H | -2.8530950 | -1.0473303 | -3.2998606 |
| H | 2.8776862  | -0.0231604 | -4.3555300 |
| H | 2.2901675  | 4.3568312  | -1.2720444 |
| H | 1.6264084  | 5.9310973  | 0.6714411  |
| H | -1.1286053 | 5.8734904  | 1.5234774  |
| H | -1.4967965 | 4.3467387  | 2.5715408  |

### 15d-2-ma

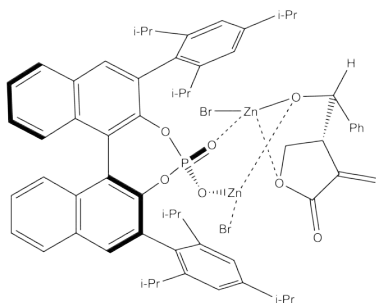

Energy (Hartree) = -11970.04445078

|    |            |            |            |
|----|------------|------------|------------|
| Zn | 2.3365384  | 1.5771762  | -0.0818539 |
| Br | 4.5002821  | 1.8027703  | -0.8357670 |
| H  | 3.5393654  | 3.9368813  | 0.7814922  |
| Br | -3.0157137 | 3.5090096  | -0.2486892 |
| Zn | -0.9892495 | 2.4720475  | -0.5812373 |
| C  | 1.4804195  | 4.8269250  | 0.7017190  |
| C  | 2.6623641  | 4.1545416  | 1.4232056  |
| C  | 0.3480513  | 4.3576404  | 1.5833289  |
| C  | -0.8567469 | 4.8948899  | 1.8598160  |
| C  | 0.7424844  | 3.0089643  | 2.0761413  |
| O  | 2.1305023  | 2.8708653  | 1.8771448  |
| O  | 0.0682166  | 2.1053333  | 2.5048339  |
| H  | 2.9846709  | 4.7319219  | 2.3142137  |
| C  | -1.1099040 | 6.9137290  | -2.1939044 |
| C  | -0.1398850 | 6.3151030  | -1.3748231 |
| C  | 0.2835517  | 4.9930118  | -1.6094510 |
| C  | -0.2729844 | 4.2968273  | -2.7079466 |
| C  | -1.2408415 | 4.8955811  | -3.5266159 |
| C  | -1.6689496 | 6.2055886  | -3.2685461 |
| H  | -1.4384042 | 7.9426918  | -1.9820489 |
| H  | 0.2773906  | 6.8962288  | -0.5396735 |
| C  | 1.3043839  | 4.2583347  | -0.7459584 |
| H  | 0.0673388  | 3.2730058  | -2.9316335 |
| H  | -1.6645930 | 4.3282158  | -4.3694198 |
| H  | -2.4371635 | 6.6746427  | -3.9014000 |
| O  | 0.9427669  | 2.8741283  | -0.6876346 |
| C  | -0.4700232 | -2.4780008 | 1.6715481  |
| C  | -0.6162460 | -3.6056565 | 0.8512587  |
| C  | -0.1903622 | -4.8800054 | 1.3839961  |
| C  | -0.1150482 | -6.0670114 | 0.5937729  |
| C  | 0.2157487  | -4.9600203 | 2.7668529  |
| C  | 0.5961031  | -6.2228030 | 3.3125229  |
| C  | 0.2808042  | -3.7739889 | 3.5510275  |
| H  | 0.5949906  | -3.8476638 | 4.6031670  |
| C  | 0.0039552  | -2.5208834 | 3.0174558  |
| C  | -0.8570996 | -2.3943820 | -2.7915510 |
| C  | -1.8055694 | -3.2665111 | -3.3126826 |
| H  | -2.0591172 | -3.2138718 | -4.3827009 |

|   |            |            |            |
|---|------------|------------|------------|
| C | -2.5063951 | -4.1935588 | -2.4858641 |
| C | -3.5447517 | -5.0136092 | -3.0207709 |
| C | -2.2006051 | -4.2786314 | -1.0760354 |
| C | -2.9993301 | -5.1347430 | -0.2609933 |
| C | -1.1242018 | -3.4757851 | -0.5463828 |
| C | -0.5363872 | -2.5453979 | -1.4065201 |
| O | -0.8504884 | -1.2240365 | 1.1936616  |
| O | 0.4689186  | -1.7245275 | -0.9119981 |
| P | 0.0567270  | -0.4798823 | 0.0623856  |
| O | 1.4054627  | 0.0264978  | 0.5982480  |
| O | -0.8765460 | 0.5219663  | -0.6282504 |
| C | 0.6210271  | -7.3630606 | 2.5250203  |
| C | 0.2796481  | -7.2759277 | 1.1495661  |
| H | 0.8906581  | -6.2672799 | 4.3728412  |
| H | 0.9235185  | -8.3292097 | 2.9567591  |
| H | -0.3638476 | -6.0168860 | -0.4747589 |
| H | 0.3337742  | -8.1734438 | 0.5146604  |
| C | -4.0154146 | -5.9040026 | -0.8108714 |
| C | -4.2823361 | -5.8575928 | -2.2046363 |
| H | -2.8059878 | -5.1734743 | 0.8200442  |
| H | -4.6218613 | -6.5511635 | -0.1590671 |
| H | -5.0847413 | -6.4784778 | -2.6312780 |
| H | -3.7612227 | -4.9482707 | -4.0987120 |
| C | 1.5469076  | -0.8139273 | 4.0542350  |
| C | 0.2185384  | -1.2716906 | 3.8191396  |
| C | 1.7353823  | 0.2868435  | 4.9059880  |
| C | -0.8826416 | -0.5682927 | 4.3706770  |
| C | -0.6363259 | 0.5325220  | 5.2125919  |
| C | 0.6637009  | 0.9687661  | 5.5079582  |
| H | 2.7602918  | 0.6425715  | 5.0998132  |
| C | -2.3271259 | -0.9547822 | 4.0634560  |
| H | -1.4974823 | 1.0690309  | 5.6387312  |
| C | -3.0558564 | 0.1747678  | 3.3102470  |
| H | -3.1522992 | 1.0840211  | 3.9396690  |
| H | -4.0796556 | -0.1428879 | 3.0233723  |
| H | -2.5126894 | 0.4613898  | 2.3891506  |
| C | -3.0888265 | -1.3782492 | 5.3318568  |
| H | -2.3056963 | -1.8373602 | 3.3917474  |
| H | -3.1692353 | -0.5416615 | 6.0570930  |
| H | -2.5786386 | -2.2182117 | 5.8457854  |
| H | -4.1203997 | -1.7027346 | 5.0823584  |
| C | 0.9450636  | 2.1909705  | 6.3769534  |
| C | 1.1296441  | 3.4460415  | 5.4995207  |
| H | 1.4090346  | 4.3271954  | 6.1143331  |
| H | 0.1887500  | 3.6854643  | 4.9618856  |
| H | 1.9202402  | 3.2882262  | 4.7382720  |
| C | -0.1053469 | 2.4368392  | 7.4682456  |
| H | 1.9174791  | 1.9994703  | 6.8842103  |
| H | 0.2150828  | 3.2583978  | 8.1408517  |
| H | -0.2725141 | 1.5312552  | 8.0853783  |
| H | -1.0831828 | 2.7352661  | 7.0357514  |
| C | 2.7601812  | -1.4632727 | 3.3857505  |
| C | 3.7666770  | -0.4244499 | 2.8572793  |
| H | 4.4961702  | -0.9013419 | 2.1718962  |
| H | 4.3475592  | 0.0445702  | 3.6786633  |
| H | 3.2568525  | 0.3854662  | 2.3042327  |
| C | 3.4693598  | -2.4612074 | 4.3206169  |
| H | 2.3837574  | -2.0274811 | 2.5068885  |
| H | 4.3449147  | -2.9197638 | 3.8157844  |
| H | 2.7968130  | -3.2801904 | 4.6416609  |
| H | 3.8340107  | -1.9487007 | 5.2356480  |
| H | 0.8723106  | 3.0725673  | -5.3181246 |
| H | 3.2175731  | -2.3902932 | -5.2237043 |
| H | -4.2668010 | -0.4190086 | -5.2843356 |
| C | 1.6641317  | 2.2941637  | -5.2410085 |
| H | 3.8546825  | -2.8637949 | -2.1123181 |
| H | 3.1419387  | 3.8206912  | -4.6949887 |
| H | -4.2393321 | 0.9959233  | -3.1751109 |
| C | 1.0057875  | 1.0488853  | -4.6608444 |
| C | 2.5978495  | -3.0758166 | -4.6086331 |
| C | 2.7720592  | 2.8424092  | -4.3256625 |

|   |            |            |            |
|---|------------|------------|------------|
| H | 3.6418582  | 2.1564243  | -4.2731273 |
| C | 1.7738827  | -0.0502246 | -4.2378540 |
| C | -3.1604383 | -0.3494557 | -5.3349498 |
| H | 1.3830409  | 1.6802642  | -7.3358941 |
| C | -0.3900124 | 0.9473604  | -4.5515333 |
| C | 2.1917654  | 2.0312199  | -6.6638081 |
| H | 2.6315759  | 2.9513984  | -7.1013894 |
| H | -1.0084630 | 1.7889323  | -4.9054173 |
| C | 3.2745736  | -1.9692847 | -2.4183698 |
| H | 3.2184627  | -3.9614536 | -4.3596405 |
| H | 1.7493172  | -3.4148409 | -5.2369199 |
| C | 1.1919676  | -1.2050912 | -3.6905994 |
| C | -3.1318398 | 1.0436774  | -3.2085405 |
| C | -1.0296488 | -0.1809947 | -3.9993022 |
| H | -2.7800137 | -1.2614716 | -5.8389248 |
| H | -2.9060206 | 0.5147681  | -5.9838671 |
| C | 2.1021332  | -2.3775431 | -3.3268089 |
| C | -0.2257249 | -1.2662353 | -3.5455318 |
| C | -2.5568833 | -0.1864163 | -3.9266229 |
| H | 2.9160924  | -1.4657326 | -1.5001800 |
| H | -2.7781965 | 1.0922854  | -2.1617120 |
| H | 3.9794649  | -1.2802669 | -2.9275678 |
| H | 2.4135840  | 2.9755949  | -3.2859882 |
| H | -2.8636795 | 1.9978310  | -3.7078713 |
| H | 2.9814655  | 1.2511301  | -6.6537224 |
| H | 1.4966980  | -3.1224732 | -2.7720578 |
| H | -2.8652007 | -1.0676076 | -3.3306565 |
| H | 2.8696418  | -0.0068512 | -4.3343596 |
| H | 2.3008629  | 4.3215157  | -1.2485085 |
| H | 1.6110061  | 5.9246942  | 0.6747521  |
| H | -1.1740121 | 5.8640473  | 1.4501215  |
| H | -1.5593218 | 4.3489054  | 2.5078901  |

### 15j-ma; COSMO

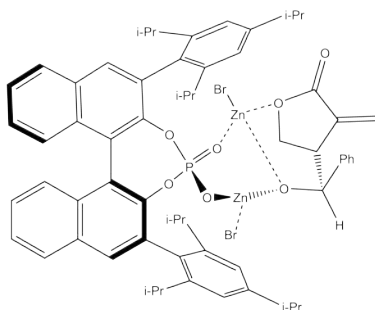

Energy (Hartree) = -11970.05572716

|    |            |           |             |
|----|------------|-----------|-------------|
| Zn | 1.9680744  | 5.7371824 | 269.3817579 |
| Br | 2.8906908  | 6.9738319 | 271.0982698 |
| H  | 1.2604830  | 8.4200125 | 269.2130332 |
| Br | 1.6563697  | 4.4953972 | 263.8445571 |
| Zn | 2.2274065  | 4.7350101 | 266.0668194 |
| C  | 1.1552955  | 8.0881464 | 266.9967020 |
| C  | 0.5431585  | 8.1746630 | 268.4052059 |
| C  | 0.1715675  | 7.1404709 | 266.3528868 |
| C  | -0.2289321 | 6.9938849 | 265.0744645 |
| C  | -0.2820074 | 6.2215680 | 267.4326964 |
| O  | 0.0398621  | 6.8229731 | 268.6673465 |
| O  | -0.7670609 | 5.1187830 | 267.3718623 |
| H  | -0.3137724 | 8.8769292 | 268.4421451 |
| C  | 3.7783230  | 8.2823727 | 263.4603411 |
| C  | 3.0604242  | 8.3504954 | 264.6649381 |
| C  | 3.3379462  | 7.4575791 | 265.7179384 |
| C  | 4.3769120  | 6.5123692 | 265.5400103 |
| C  | 5.0953328  | 6.4469353 | 264.3368736 |
| C  | 4.7931886  | 7.3276841 | 263.2882018 |
| H  | 3.5341043  | 8.9795622 | 262.6442764 |
| H  | 2.2719740  | 9.1096503 | 264.7683908 |

|   |            |            |             |
|---|------------|------------|-------------|
| C | 2.5778692  | 7.4394654  | 267.0403233 |
| H | 4.6412843  | 5.8310988  | 266.3652000 |
| H | 5.8958098  | 5.7001175  | 264.2213010 |
| H | 5.3467864  | 7.2721946  | 262.3388470 |
| O | 2.4860691  | 6.0798100  | 267.4872687 |
| C | -0.0078971 | 0.8905415  | 269.2193009 |
| C | 0.7852074  | -0.1882259 | 269.6355437 |
| C | 0.2721755  | -1.0265667 | 270.6951549 |
| C | 1.0528244  | -2.0380488 | 271.3333168 |
| C | -1.0767219 | -0.8148998 | 271.1638700 |
| C | -1.6068153 | -1.6659549 | 272.1802801 |
| C | -1.8407128 | 0.2682853  | 270.6448077 |
| H | -2.8668693 | 0.4187960  | 271.0129911 |
| C | -1.3150533 | 1.1662248  | 269.7228431 |
| C | 4.4108715  | 0.5350567  | 268.5739889 |
| C | 4.8450888  | -0.7275412 | 268.1872743 |
| H | 5.8912023  | -0.8695542 | 267.8753760 |
| C | 3.9548522  | -1.8405154 | 268.1263227 |
| C | 4.3973521  | -3.1060602 | 267.6356222 |
| C | 2.5730456  | -1.6833636 | 268.5195464 |
| C | 1.6875766  | -2.7871822 | 268.3364428 |
| C | 2.1401901  | -0.4127466 | 269.0509996 |
| C | 3.0548490  | 0.6422186  | 269.0144132 |
| O | 0.4568282  | 1.7390072  | 268.2137759 |
| O | 2.6500162  | 1.8886841  | 269.4757124 |
| P | 1.6643432  | 2.7884861  | 268.5344586 |
| O | 1.2372661  | 3.9465230  | 269.4496781 |
| O | 2.2945050  | 3.1224445  | 267.1762562 |
| C | -0.8316184 | -2.6631457 | 272.7521956 |
| C | 0.5153852  | -2.8347548 | 272.3351811 |
| H | -2.6425883 | -1.4992632 | 272.5156525 |
| H | -1.2495236 | -3.3075261 | 273.5406317 |
| H | 2.1000274  | -2.1783179 | 271.0330459 |
| H | 1.1425764  | -3.6020838 | 272.8142594 |
| C | 2.1465238  | -3.9986402 | 267.8368421 |
| C | 3.5155605  | -4.1678966 | 267.4981337 |
| H | 0.6246009  | -2.6668791 | 268.5883478 |
| H | 1.4415844  | -4.8324982 | 267.6977957 |
| H | 3.8700459  | -5.1355222 | 267.1114715 |
| H | 5.4553100  | -3.2172109 | 267.3501591 |
| C | -2.2233639 | 3.4699723  | 270.2088001 |
| C | -2.0865562 | 2.3810491  | 269.3005087 |
| C | -3.0523462 | 4.5452281  | 269.8476825 |
| C | -2.7096355 | 2.4372747  | 268.0272565 |
| C | -3.5242926 | 3.5418455  | 267.7141870 |
| C | -3.7243193 | 4.5997699  | 268.6139438 |
| H | -3.1696855 | 5.3883386  | 270.5477280 |
| C | -2.5070092 | 1.3483149  | 266.9768135 |
| H | -4.0053161 | 3.5747814  | 266.7248874 |
| C | -1.7943031 | 1.9072604  | 265.7299920 |
| H | -2.4203076 | 2.6639602  | 265.2126204 |
| H | -1.5812425 | 1.0950289  | 265.0042547 |
| H | -0.8364095 | 2.3934886  | 265.9975639 |
| C | -3.8289312 | 0.6496439  | 266.6118016 |
| H | -1.8446130 | 0.5738889  | 267.4151031 |
| H | -4.5485657 | 1.3567105  | 266.1483731 |
| H | -4.3154395 | 0.2157811  | 267.5092442 |
| H | -3.6530486 | -0.1707685 | 265.8852846 |
| C | -4.5618117 | 5.8270704  | 268.2673174 |
| C | -3.6664727 | 6.9480679  | 267.7006392 |
| H | -4.2537052 | 7.8706765  | 267.5100299 |
| H | -3.2036170 | 6.6298230  | 266.7433712 |
| H | -2.8464377 | 7.1980899  | 268.4037769 |
| C | -5.7356901 | 5.5346574  | 267.3227237 |
| H | -4.9867528 | 6.2004134  | 269.2262366 |
| H | -6.3744238 | 6.4337693  | 267.2055487 |
| H | -6.3696797 | 4.7082073  | 267.7027648 |
| H | -5.3844289 | 5.2518490  | 266.3082915 |
| C | -1.4722827 | 3.5153582  | 271.5407704 |
| C | -0.8587681 | 4.8997231  | 271.8213654 |
| H | -0.1266711 | 4.8399454  | 272.6519407 |



|   |            |           |             |   |            |            |             |
|---|------------|-----------|-------------|---|------------|------------|-------------|
| H | -1.6297246 | 5.6423214 | 272.1152292 | C | 0.4166035  | 8.2231971  | 267.7502324 |
| H | -0.3357533 | 5.2952349 | 270.9314343 | C | 0.0165825  | 6.9995252  | 265.8298965 |
| C | -2.3609451 | 3.0793391 | 272.7211273 | C | -0.5051716 | 6.7993798  | 264.6047228 |
| H | -0.6299471 | 2.7964909 | 271.4632669 | C | -0.4290462 | 6.1898500  | 266.9985803 |
| H | -1.7950686 | 3.1179910 | 273.6752802 | O | -0.0785367 | 6.9072381  | 268.1624328 |
| H | -2.7424862 | 2.0473369 | 272.5950616 | O | -0.9468883 | 5.1027655  | 267.0534479 |
| H | -3.2386290 | 3.7525861 | 272.8188170 | H | -0.4473726 | 8.9172098  | 267.6965091 |
| H | 7.0820413  | 5.9827810 | 267.0208023 | C | 3.9899453  | 7.2264812  | 263.0064814 |
| H | 7.1682778  | 2.5400785 | 271.8771706 | C | 3.0325701  | 7.3471700  | 264.0278427 |
| H | 6.6215770  | 0.2857698 | 264.5075394 | C | 3.4221873  | 7.3219219  | 265.3797894 |
| C | 7.0574485  | 5.7405232 | 268.1066047 | C | 4.7943074  | 7.1771359  | 265.6877408 |
| H | 4.1155868  | 2.6113050 | 272.8707845 | C | 5.7500804  | 7.0610618  | 264.6712945 |
| H | 6.5971403  | 7.8318633 | 268.5851503 | C | 5.3480485  | 7.0827937  | 263.3238265 |
| H | 4.5590401  | 1.6452354 | 263.8973995 | H | 3.6644560  | 7.2326544  | 261.9554735 |
| C | 6.4375125  | 4.3551480 | 268.2369008 | H | 1.9732580  | 7.4379409  | 263.7579945 |
| C | 6.5019829  | 1.6613852 | 271.7483421 | C | 2.4561980  | 7.3078876  | 266.5489198 |
| C | 6.2108505  | 6.8163618 | 268.8088216 | H | 5.1064903  | 7.1426963  | 266.7437104 |
| H | 6.2187539  | 6.6916003 | 269.9108674 | H | 6.8143525  | 6.9509245  | 264.9314559 |
| C | 6.0781843  | 3.8343253 | 269.4927374 | H | 6.0955843  | 6.9858282  | 262.5217006 |
| C | 6.7643896  | 0.9174583 | 265.4086553 | O | 2.3069898  | 5.9463056  | 266.9917542 |
| H | 9.1325625  | 5.0084350 | 268.0760129 | C | -0.0679073 | 0.9008788  | 269.2093062 |
| C | 6.2182952  | 3.5470106 | 267.1097822 | C | 0.7787930  | -0.1477897 | 269.5892626 |
| C | 8.5110860  | 5.7517771 | 268.6149225 | C | 0.3469735  | -0.9950194 | 270.6766821 |
| H | 8.9713646  | 6.7523308 | 268.4782682 | C | 1.1828851  | -1.9914981 | 271.2655731 |
| H | 6.5231976  | 3.9286070 | 266.1214160 | C | -0.9765884 | -0.8086521 | 271.2237733 |
| C | 4.3805753  | 3.0600970 | 271.8914731 | C | -1.4264424 | -1.6682499 | 272.2704375 |
| H | 6.2983226  | 1.2400731 | 272.7547101 | C | -1.7934588 | 0.2576532  | 270.7502048 |
| H | 7.0574748  | 0.9012351 | 271.1621521 | H | -2.7967136 | 0.3918078  | 271.1824671 |
| C | 5.4829809  | 2.5704425 | 269.6370227 | C | -1.3462781 | 1.1566725  | 269.7894881 |
| C | 4.7072847  | 2.2755104 | 264.7979151 | C | 4.3476907  | 0.7031237  | 268.4455884 |
| C | 5.6133099  | 2.2762274 | 267.1920744 | C | 4.8032973  | -0.5341744 | 268.0084206 |
| H | 7.2605315  | 0.3014678 | 266.1863547 | H | 5.8540664  | -0.6454580 | 267.7008148 |
| H | 7.4638741  | 1.7371953 | 265.1406425 | C | 3.9397141  | -1.6667338 | 267.9282328 |
| C | 5.1883286  | 2.0595437 | 271.0467772 | C | 4.4005971  | -2.9062706 | 267.3921974 |
| C | 5.2225715  | 1.7884807 | 268.4728449 | C | 2.5702497  | -1.5623393 | 268.3765989 |
| C | 5.4166949  | 1.4784961 | 265.9027768 | C | 1.7143750  | -2.6916848 | 268.2108688 |
| H | 3.4413153  | 3.3502548 | 271.3825103 | C | 2.1146740  | -0.3165591 | 268.9435275 |
| H | 3.7065843  | 2.6107741 | 265.1289365 | C | 2.9929226  | 0.7695957  | 268.8928024 |
| H | 4.9526990  | 3.9877192 | 272.0992012 | O | 0.3115087  | 1.7373158  | 268.1634334 |
| H | 5.1497191  | 6.7690294 | 268.4932945 | O | 2.5525160  | 2.0080761  | 269.3486609 |
| H | 5.2817467  | 3.1691930 | 264.4773673 | P | 1.5159084  | 2.8139516  | 268.3696958 |
| H | 8.5527670  | 5.5052744 | 269.6966284 | O | 1.0899032  | 4.0340489  | 269.2004441 |
| H | 4.5820138  | 1.1357005 | 270.9568945 | O | 2.1075657  | 3.0338029  | 266.9746527 |
| H | 4.7624190  | 0.6153116 | 266.1349962 | C | -0.6001698 | -2.6501288 | 272.7943503 |
| H | 6.2625646  | 4.4368712 | 270.3955170 | C | 0.7212140  | -2.7979457 | 272.2964745 |
| H | -0.9451135 | 6.1985872 | 264.8162300 | H | -2.4431451 | -1.5212966 | 272.6677262 |
| H | 0.1400024  | 7.6431101 | 264.2678486 | H | -0.9581361 | -3.3012127 | 273.6063163 |
| H | 1.1983961  | 9.0878810 | 266.5270139 | H | 2.2116123  | -2.1128348 | 270.9002984 |
| H | 3.1742332  | 8.0027171 | 267.7987102 | H | 1.3894754  | -3.5546736 | 272.7351082 |

### 15j-ma

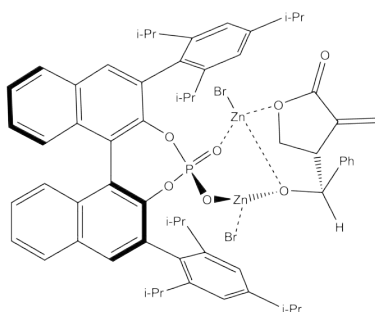

Energy (Hartree) = -11970.03925891

|    |           |           |             |
|----|-----------|-----------|-------------|
| Zn | 1.8204572 | 5.7982183 | 268.9307011 |
| Br | 2.8428200 | 7.2333156 | 270.4158145 |
| H  | 1.1254202 | 8.5584274 | 268.5326484 |
| Br | 1.2585326 | 4.1682232 | 263.5393644 |
| Zn | 2.0250947 | 4.5025620 | 265.6890075 |
| C  | 1.0475389 | 7.9716888 | 266.3635306 |

|   |            |            |             |
|---|------------|------------|-------------|
| C | 0.4166035  | 8.2231971  | 267.7502324 |
| C | 0.0165825  | 6.9995252  | 265.8298965 |
| C | -0.5051716 | 6.7993798  | 264.6047228 |
| C | -0.4290462 | 6.1898500  | 266.9985803 |
| O | -0.0785367 | 6.9072381  | 268.1624328 |
| O | -0.9468883 | 5.1027655  | 267.0534479 |
| H | -0.4473726 | 8.9172098  | 267.6965091 |
| C | 3.9899453  | 7.2264812  | 263.0064814 |
| C | 3.0325701  | 7.3471700  | 264.0278427 |
| C | 3.4221873  | 7.3219219  | 265.3797894 |
| C | 4.7943074  | 7.1771359  | 265.6877408 |
| C | 5.7500804  | 7.0610618  | 264.6712945 |
| C | 5.3480485  | 7.0827937  | 263.3238265 |
| H | 3.6644560  | 7.2326544  | 261.9554735 |
| H | 1.9732580  | 7.4379409  | 263.7579945 |
| C | 2.4561980  | 7.3078876  | 266.5489198 |
| H | 5.1064903  | 7.1426963  | 266.7437104 |
| H | 6.8143525  | 6.9509245  | 264.9314559 |
| H | 6.0955843  | 6.9858282  | 262.5217006 |
| O | 2.3069898  | 5.9463056  | 266.9917542 |
| C | -0.0679073 | 0.9008788  | 269.2093062 |
| C | 0.7787930  | -0.1477897 | 269.5892626 |
| C | 0.3469735  | -0.9950194 | 270.6766821 |
| C | 1.1828851  | -1.9914981 | 271.2655731 |
| C | -0.9765884 | -0.8086521 | 271.2237733 |
| C | -1.4264424 | -1.6682499 | 272.2704375 |
| C | -1.7934588 | 0.2576532  | 270.7502048 |
| H | -2.7967136 | 0.3918078  | 271.1824671 |
| C | -1.3462781 | 1.1566725  | 269.7894881 |
| C | 4.3476907  | 0.7031237  | 268.4455884 |
| C | 4.8032973  | -0.5341744 | 268.0084206 |
| H | 5.8540664  | -0.6454580 | 267.7008148 |
| C | 3.9397141  | -1.6667338 | 267.9282328 |
| C | 4.4005971  | -2.9062706 | 267.3921974 |
| C | 2.5702497  | -1.5623393 | 268.3765989 |
| C | 1.7143750  | -2.6916848 | 268.2108688 |
| C | 2.1146740  | -0.3165591 | 268.9435275 |
| C | 2.9929226  | 0.7695957  | 268.8928024 |
| O | 0.3115087  | 1.7373158  | 268.1634334 |
| O | 2.5525160  | 2.0080761  | 269.3486609 |
| P | 1.5159084  | 2.8139516  | 268.3696958 |
| O | 1.0899032  | 4.0340489  | 269.2004441 |
| O | 2.1075657  | 3.0338029  | 266.9746527 |
| C | -0.6001698 | -2.6501288 | 272.7943503 |
| C | 0.7212140  | -2.7979457 | 272.2964745 |
| H | -2.4431451 | -1.5212966 | 272.6677262 |
| H | -0.9581361 | -3.3012127 | 273.6063163 |
| H | 2.2116123  | -2.1128348 | 270.9002984 |
| H | 1.3894754  | -3.5546736 | 272.7351082 |
| C | 2.1908634  | -3.8766960 | 267.6678162 |
| C | 3.5481483  | -3.9927066 | 267.2670404 |
| H | 0.6604799  | -2.6094966 | 268.5117580 |
| H | 1.5087380  | -4.7313483 | 267.5423496 |
| H | 3.9168877  | -4.9397405 | 266.8445550 |
| H | 5.4494589  | -2.9778446 | 267.0637471 |
| C | -2.1983629 | 3.4867576  | 270.2623221 |
| C | -2.1512434 | 2.3589536  | 269.3935904 |
| C | -3.0321719 | 4.5635152  | 269.9175627 |
| C | -2.8695989 | 2.3745496  | 268.1707427 |
| C | -3.6869244 | 3.4811692  | 267.8733650 |
| C | -3.7972606 | 4.5797298  | 268.7385763 |
| H | -3.0815625 | 5.4369440  | 270.5874998 |
| C | -2.7625132 | 1.2396216  | 267.1555577 |
| H | -4.2436028 | 3.4817178  | 266.9239948 |
| C | -2.1545334 | 1.7370017  | 265.8300866 |
| H | -2.8202744 | 2.4704358  | 265.3291105 |
| H | -1.9998374 | 0.8918381  | 265.1278705 |
| H | -1.1783943 | 2.2319630  | 265.9963907 |
| C | -4.1144589 | 0.5379462  | 266.9360811 |
| H | -2.0689747 | 0.4795380  | 267.5708159 |
| H | -4.8684227 | 1.2322749  | 266.5096171 |

|   |            |            |             |
|---|------------|------------|-------------|
| H | -4.5233948 | 0.1448927  | 267.8890812 |
| H | -4.0076116 | -0.3119265 | 266.2303885 |
| C | -4.6426753 | 5.8055379  | 268.4063446 |
| C | -3.7906968 | 6.8745449  | 267.6919983 |
| H | -4.3783660 | 7.7992372  | 267.5122468 |
| H | -3.4356352 | 6.4951732  | 266.7112698 |
| H | -2.8969247 | 7.1392171  | 268.2920075 |
| C | -5.9101679 | 5.4869982  | 267.6014006 |
| H | -4.9641644 | 6.2392324  | 269.3799622 |
| H | -6.5439342 | 6.3911497  | 267.4965099 |
| H | -6.5151605 | 4.6962050  | 268.0888203 |
| H | -5.6674464 | 5.1411329  | 266.5749141 |
| C | -1.3543016 | 3.5646181  | 271.5356288 |
| C | -0.7422976 | 4.9597138  | 271.7589681 |
| H | 0.0429033  | 4.9184049  | 272.5405844 |
| H | -1.5008236 | 5.6958295  | 272.0977218 |
| H | -0.2807637 | 5.3527563  | 270.8341479 |
| C | -2.1527711 | 3.1312314  | 272.7799478 |
| H | -0.5097222 | 2.8548087  | 271.4093358 |
| H | -1.5240149 | 3.1910650  | 273.6926187 |
| H | -2.5248772 | 2.0920002  | 272.6932195 |
| H | -3.0327391 | 3.7917881  | 272.9283949 |
| H | 7.6501434  | 5.9870985  | 267.6790424 |
| H | 7.1683602  | 2.0570492  | 272.0971274 |
| H | 5.6849028  | 1.0033916  | 264.2141534 |
| C | 7.5149789  | 5.6369424  | 268.7275322 |
| H | 4.0565635  | 2.1643821  | 272.8917449 |
| H | 7.2607249  | 7.6956059  | 269.4512217 |
| H | 4.0004724  | 3.0903755  | 264.2172566 |
| C | 6.7311367  | 4.3332407  | 268.6544498 |
| C | 6.4793166  | 1.2341677  | 271.8132670 |
| C | 6.7286239  | 6.7223638  | 269.4844646 |
| H | 6.5927719  | 6.4519683  | 270.5520553 |
| C | 6.3681810  | 3.6297697  | 269.8150011 |
| C | 6.0669758  | 1.3083819  | 265.2103804 |
| H | 9.4936662  | 4.6749556  | 268.7650921 |
| C | 6.3096738  | 3.8154807  | 267.4204327 |
| C | 8.9151826  | 5.4320727  | 269.3317349 |
| H | 9.4908822  | 6.3807891  | 269.3298972 |
| H | 6.5730015  | 4.3702015  | 266.5062451 |
| C | 4.4027473  | 2.7034695  | 271.9858622 |
| H | 6.1923267  | 0.7024312  | 272.7440182 |
| H | 7.0470457  | 0.5278115  | 271.1742135 |
| C | 5.6078187  | 2.4482245  | 269.7685506 |
| C | 4.6706431  | 3.3951469  | 265.0444363 |
| C | 5.5379330  | 2.6422357  | 267.3155456 |
| H | 6.2907042  | 0.3880176  | 265.7830207 |
| H | 7.0237338  | 1.8510145  | 265.0594045 |
| C | 5.2330470  | 1.7695529  | 271.0848079 |
| C | 5.1981953  | 1.9377363  | 268.5039382 |
| C | 5.0443312  | 2.2003759  | 265.9391364 |
| H | 3.5124539  | 3.0855965  | 271.4495109 |
| H | 4.1894250  | 4.2033433  | 265.6451153 |
| H | 4.9959611  | 3.5778483  | 272.3256642 |
| H | 5.7117698  | 6.8649463  | 269.0658710 |
| H | 5.5532199  | 3.8860262  | 264.5854390 |
| H | 8.8493702  | 5.0849999  | 270.3840890 |
| H | 4.5990113  | 0.8911476  | 270.8476898 |
| H | 4.1204498  | 1.6083242  | 266.0999686 |
| H | 6.6712105  | 4.0234988  | 270.7982176 |
| H | -1.2702111 | 6.0209644  | 264.4618421 |
| H | -0.2017218 | 7.3890897  | 263.7274734 |
| H | 1.1348834  | 8.9064036  | 265.7768720 |
| H | 2.9527092  | 7.8605802  | 267.3804301 |

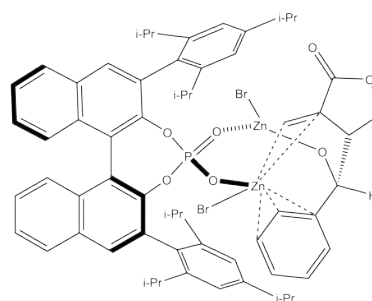

Energy (Hartree) = -11970.02665521

|    |            |            |             |
|----|------------|------------|-------------|
| Zn | 1.9988286  | 5.7008377  | 270.6867533 |
| Br | 2.4527291  | 5.4004822  | 272.9296151 |
| C  | -0.6819169 | 6.0884111  | 266.4998684 |
| C  | 0.2463828  | 6.4318397  | 267.5178809 |
| C  | 0.9117682  | 7.6885022  | 267.5000570 |
| C  | 0.6603906  | 8.5628170  | 266.4214608 |
| C  | -0.2564036 | 8.2178008  | 265.4173560 |
| C  | -0.9340366 | 6.9857004  | 265.4541325 |
| H  | -1.2124758 | 5.1256700  | 266.5592836 |
| H  | 0.3405076  | 5.7993018  | 268.4136293 |
| C  | 1.7815260  | 8.1066425  | 268.6917243 |
| H  | 1.1623237  | 9.5430148  | 266.3849581 |
| H  | -0.4460576 | 8.9198069  | 264.5914166 |
| H  | -1.6466473 | 6.7233066  | 264.6590761 |
| O  | 1.6308906  | 7.3408071  | 269.8060347 |
| C  | 3.3091885  | 8.2716339  | 268.2355336 |
| C  | 3.8751836  | 6.9556414  | 267.8302882 |
| C  | 4.2455738  | 6.2947807  | 269.1239337 |
| O  | 4.5318226  | 7.2719588  | 270.0178814 |
| C  | 4.1669906  | 8.5735224  | 269.4802856 |
| O  | 4.2569070  | 5.1111479  | 269.4132793 |
| C  | 4.1232021  | 6.4204830  | 266.6044627 |
| H  | 5.0974628  | 9.1212371  | 269.2283250 |
| H  | 3.6133888  | 9.1053904  | 270.2766211 |
| Zn | 1.9209011  | 5.4486851  | 266.2756032 |
| Br | 1.9544666  | 5.6212953  | 263.9557919 |
| C  | 0.0637725  | 1.3718529  | 269.0722088 |
| C  | 0.8212868  | 0.2781904  | 269.5020065 |
| C  | 0.2950605  | -0.5219359 | 270.5813664 |
| C  | 1.0517414  | -1.5471610 | 271.2245610 |
| C  | -1.0425656 | -0.2588927 | 271.0556338 |
| C  | -1.5828067 | -1.0659071 | 272.1017984 |
| C  | -1.7935900 | 0.8113086  | 270.4899013 |
| H  | -2.8272433 | 0.9712699  | 270.8314347 |
| C  | -1.2529443 | 1.6672962  | 269.5371397 |
| C  | 4.4290265  | 0.7094188  | 268.2311067 |
| C  | 4.7134588  | -0.5786865 | 267.7932415 |
| H  | 5.7223682  | -0.8064575 | 267.4163326 |
| C  | 3.7259369  | -1.6047976 | 267.7778416 |
| C  | 4.0137478  | -2.8964167 | 267.2421953 |
| C  | 2.4019143  | -1.3288379 | 268.2829620 |
| C  | 1.4099051  | -2.3491550 | 268.1670168 |
| C  | 2.1265714  | -0.0297583 | 268.8507112 |
| C  | 3.1202418  | 0.9497490  | 268.7511256 |
| O  | 0.5904021  | 2.2050280  | 268.0855948 |
| O  | 2.8733330  | 2.2248802  | 269.2535988 |
| P  | 1.7940403  | 3.2216499  | 268.5470221 |
| O  | 1.2965279  | 4.1767278  | 269.6337063 |
| O  | 2.3149035  | 3.8095671  | 267.2240577 |
| C  | -0.8286697 | -2.0710125 | 272.6885485 |
| C  | 0.5043079  | -2.3006399 | 272.2539619 |
| H  | -2.6087310 | -0.8614683 | 272.4462816 |
| H  | -1.2538481 | -2.6803612 | 273.5005570 |
| H  | 2.0870962  | -1.7296964 | 270.9045194 |
| H  | 1.1114468  | -3.0787871 | 272.7411990 |
| C  | 1.7172254  | -3.5892679 | 267.6236844 |

15j-mi; COSMO

|   |            |            |             |
|---|------------|------------|-------------|
| C | 3.0331092  | -3.8743841 | 267.1706051 |
| H | 0.3850379  | -2.1416302 | 268.5043250 |
| H | 0.9317443  | -4.3557458 | 267.5390315 |
| H | 3.2669120  | -4.8641257 | 266.7496429 |
| H | 5.0316054  | -3.0956232 | 266.8715818 |
| C | -2.2644236 | 3.9880491  | 269.7542230 |
| C | -2.0385536 | 2.8147098  | 268.9753709 |
| C | -3.0875643 | 4.9973628  | 269.2246780 |
| C | -2.5886289 | 2.7160244  | 267.6691246 |
| C | -3.4145925 | 3.7549207  | 267.1920520 |
| C | -3.6923031 | 4.8985958  | 267.9572442 |
| H | -3.2631125 | 5.9078910  | 269.8192853 |
| C | -2.3079554 | 1.5269230  | 266.7520268 |
| H | -3.8458542 | 3.6590826  | 266.1844669 |
| C | -1.5170468 | 1.9644480  | 265.5037501 |
| H | -2.1056221 | 2.6659396  | 264.8756530 |
| H | -1.2628483 | 1.0869691  | 264.8740449 |
| H | -0.5694406 | 2.4648238  | 265.7865923 |
| C | -3.5974992 | 0.7762804  | 266.3746149 |
| H | -1.6711365 | 0.8104374  | 267.3090068 |
| H | -4.2864511 | 1.4161560  | 265.7845577 |
| H | -4.1436649 | 0.4375204  | 267.2783633 |
| H | -3.3638048 | -0.1168215 | 265.7591183 |
| C | -4.6238153 | 6.0104664  | 267.4843560 |
| C | -4.8356543 | 6.0552020  | 265.9663198 |
| H | -5.4316034 | 6.9468227  | 265.6854992 |
| H | -5.3902210 | 5.1647725  | 265.6032127 |
| H | -3.8742844 | 6.1022206  | 265.4163031 |
| C | -5.9765301 | 5.9194389  | 268.2202476 |
| H | -4.1447992 | 6.9696309  | 267.7863677 |
| H | -6.6397911 | 6.7636600  | 267.9393505 |
| H | -5.8430245 | 5.9381062  | 269.3204131 |
| H | -6.4963065 | 4.9732353  | 267.9609944 |
| C | -1.6320192 | 4.1803628  | 271.1330698 |
| C | -1.1627752 | 5.6245269  | 271.3815530 |
| H | -0.5149985 | 5.6664756  | 272.2806292 |
| H | -2.0130459 | 6.3150819  | 271.5616176 |
| H | -0.5934410 | 6.0413536  | 270.5254645 |
| C | -2.5864929 | 3.7494774  | 272.2640271 |
| H | -0.7324418 | 3.5317944  | 271.1740676 |
| H | -2.1040606 | 3.8895905  | 273.2532522 |
| H | -2.8818883 | 2.6863325  | 272.1792998 |
| H | -3.5141429 | 4.3596499  | 272.2464819 |
| H | 8.5285580  | 5.2685339  | 266.8934715 |
| H | 7.7676599  | 1.7316263  | 271.4785128 |
| H | 5.8668754  | 0.6173170  | 263.8852054 |
| C | 8.2932729  | 5.1106325  | 267.9693550 |
| H | 4.8838328  | 2.2814102  | 272.6817437 |
| H | 8.4032948  | 7.2517127  | 268.4539783 |
| H | 4.1718448  | 2.5179635  | 263.7835007 |
| C | 7.2988895  | 3.9566670  | 268.0391098 |
| C | 6.9389412  | 1.0151589  | 271.2977031 |
| C | 7.6738923  | 6.4164477  | 268.5026621 |
| H | 7.3500177  | 6.3078150  | 269.5585032 |
| C | 6.9290542  | 3.3858553  | 269.2692715 |
| C | 6.2896656  | 1.0496000  | 264.8158384 |
| H | 10.0647646 | 3.8510600  | 268.3023326 |
| C | 6.7139472  | 3.4361799  | 266.8722687 |
| C | 9.6136573  | 4.7869747  | 268.6893788 |
| H | 10.3481897 | 5.6072307  | 268.5517168 |
| H | 7.0047665  | 3.8668449  | 265.8994496 |
| C | 5.1314433  | 2.7626937  | 271.7132273 |
| H | 6.7004626  | 0.5268900  | 272.2654266 |
| H | 7.3140387  | 0.2367869  | 270.6018536 |
| C | 6.0068112  | 2.3297024  | 269.3578591 |
| C | 4.6091256  | 2.9490731  | 264.7071889 |
| C | 5.7821600  | 2.3792227  | 266.9029412 |
| H | 6.6985924  | 0.2185033  | 265.4256428 |
| H | 7.1417234  | 1.7015699  | 264.5298912 |
| C | 5.6975844  | 1.7278915  | 270.7272983 |
| C | 5.4274205  | 1.8223381  | 268.1625986 |

|   |           |           |             |
|---|-----------|-----------|-------------|
| C | 5.2187428 | 1.8462529 | 265.5853707 |
| H | 4.2138408 | 3.2365063 | 271.3206939 |
| H | 3.7960316 | 3.4750716 | 265.2398858 |
| H | 5.8574691 | 3.5756330 | 271.9216416 |
| H | 6.7861886 | 6.7084689 | 267.9064358 |
| H | 5.3606370 | 3.7023821 | 264.3910598 |
| H | 9.4606566 | 4.6604447 | 269.7813490 |
| H | 4.9199295 | 0.9493268 | 270.5869332 |
| H | 4.3958666 | 1.1454148 | 265.8325725 |
| H | 7.3697201 | 3.7780774 | 270.1992441 |
| H | 3.9977048 | 7.0187263 | 265.6884445 |
| H | 4.6251528 | 5.4394410 | 266.5309065 |
| H | 3.3869325 | 9.0510206 | 267.4545021 |
| H | 1.4747105 | 9.1653214 | 268.9129091 |

### 15j-mi

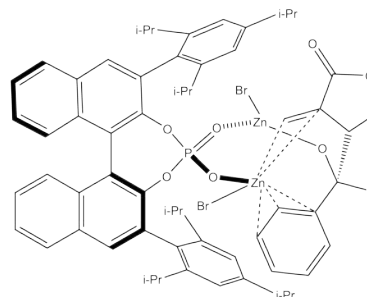

Energy (Hartree) = -11970.01338234

|    |            |            |             |
|----|------------|------------|-------------|
| Zn | 1.9316752  | 5.7289070  | 270.7435811 |
| Br | 2.4325325  | 5.3667107  | 272.9517326 |
| C  | -0.6814643 | 6.0834863  | 266.4658905 |
| C  | 0.2317262  | 6.4248440  | 267.4968964 |
| C  | 0.8926907  | 7.6830515  | 267.4938697 |
| C  | 0.6529456  | 8.5611920  | 266.4168065 |
| C  | -0.2465400 | 8.2173852  | 265.3968035 |
| C  | -0.9208665 | 6.9839980  | 265.4194915 |
| H  | -1.2100989 | 5.1190066  | 266.5141799 |
| H  | 0.3229350  | 5.7872632  | 268.3895547 |
| C  | 1.7432983  | 8.0948552  | 268.7024361 |
| H  | 1.1516866  | 9.5437704  | 266.3930980 |
| H  | -0.4236811 | 8.9204438  | 264.5689557 |
| H  | -1.6186100 | 6.7199865  | 264.6120144 |
| O  | 1.5647870  | 7.3311664  | 269.8074069 |
| C  | 3.2831015  | 8.2519001  | 268.2817013 |
| C  | 3.8571071  | 6.9569827  | 267.8223478 |
| C  | 4.2514172  | 6.2342190  | 269.0761385 |
| O  | 4.4799037  | 7.1720048  | 270.0364725 |
| C  | 4.1133670  | 8.4906277  | 269.5603786 |
| O  | 4.3431037  | 5.0420120  | 269.2828359 |
| C  | 4.1018447  | 6.4749173  | 266.5740718 |
| H  | 5.0436285  | 9.0602940  | 269.3565820 |
| H  | 3.5354937  | 8.9762668  | 270.3693262 |
| Zn | 1.9189935  | 5.4311002  | 266.2418858 |
| Br | 1.9715236  | 5.6529236  | 263.9341782 |
| C  | 0.0682797  | 1.3891485  | 269.0814464 |
| C  | 0.8266609  | 0.2956552  | 269.5101181 |
| C  | 0.3013829  | -0.5059316 | 270.5888219 |
| C  | 1.0600337  | -1.5294727 | 271.2317179 |
| C  | -1.0376190 | -0.2480170 | 271.0611766 |
| C  | -1.5763068 | -1.0581558 | 272.1050186 |
| C  | -1.7904478 | 0.8198892  | 270.4943980 |
| H  | -2.8259478 | 0.9767870  | 270.8317895 |
| C  | -1.2503231 | 1.6790831  | 269.5446455 |
| C  | 4.4321615  | 0.7172957  | 268.2294284 |
| C  | 4.7113093  | -0.5728176 | 267.7947198 |
| H  | 5.7198391  | -0.8030821 | 267.4184274 |

|   |            |            |             |
|---|------------|------------|-------------|
| C | 3.7215933  | -1.5962210 | 267.7823675 |
| C | 4.0042419  | -2.8895876 | 267.2495473 |
| C | 2.3998846  | -1.3153883 | 268.2897994 |
| C | 1.4053500  | -2.3334953 | 268.1786639 |
| C | 2.1295019  | -0.0142488 | 268.8553402 |
| C | 3.1245265  | 0.9635046  | 268.7499860 |
| O | 0.5912015  | 2.2231281  | 268.0951823 |
| O | 2.8815916  | 2.2405019  | 269.2489912 |
| P | 1.8024511  | 3.2383912  | 268.5453687 |
| O | 1.3160061  | 4.2061795  | 269.6232196 |
| O | 2.3128207  | 3.8111571  | 267.2105250 |
| C | -0.8204263 | -2.0614252 | 272.6913498 |
| C | 0.5133656  | -2.2860478 | 272.2585951 |
| H | -2.6031253 | -0.8568800 | 272.4487010 |
| H | -1.2449615 | -2.6728636 | 273.5020461 |
| H | 2.0962043  | -1.7072848 | 270.9120530 |
| H | 1.1223736  | -3.0627298 | 272.7456884 |
| C | 1.7082674  | -3.5755111 | 267.6383321 |
| C | 3.0216791  | -3.8651750 | 267.1829057 |
| H | 0.3822505  | -2.1219137 | 268.5184221 |
| H | 0.9205844  | -4.3401253 | 267.5579773 |
| H | 3.2521857  | -4.8565059 | 266.7640026 |
| H | 5.0206856  | -3.0918127 | 266.8767634 |
| C | -2.2645393 | 3.9983303  | 269.7565967 |
| C | -2.0388503 | 2.8232618  | 268.9809974 |
| C | -3.0878013 | 5.0056863  | 269.2238176 |
| C | -2.5897546 | 2.7196925  | 267.6757026 |
| C | -3.4154604 | 3.7569174  | 267.1955833 |
| C | -3.6926017 | 4.9027968  | 267.9572085 |
| H | -3.2632994 | 5.9180294  | 269.8156148 |
| C | -2.3099565 | 1.5264144  | 266.7637456 |
| H | -3.8485868 | 3.6570713  | 266.1891271 |
| C | -1.5165548 | 1.9564676  | 265.5146998 |
| H | -2.1015063 | 2.6576465  | 264.8827767 |
| H | -1.2645217 | 1.0765281  | 264.8877550 |
| H | -0.5669294 | 2.4534057  | 265.7961737 |
| C | -3.6002482 | 0.7760325  | 266.3890086 |
| H | -1.6748322 | 0.8116598  | 267.3248400 |
| H | -4.2883951 | 1.4133837  | 265.7953807 |
| H | -4.1480663 | 0.4430760  | 267.2936841 |
| H | -3.3683485 | -0.1205014 | 265.7779298 |
| C | -4.6288920 | 6.0099829  | 267.4830095 |
| C | -4.8187338 | 6.0697222  | 265.9624990 |
| H | -5.4190472 | 6.9583007  | 265.6813155 |
| H | -5.3597315 | 5.1786875  | 265.5811010 |
| H | -3.8494385 | 6.1316572  | 265.4283557 |
| C | -5.9908833 | 5.8953852  | 268.1977458 |
| H | -4.1647914 | 6.9710933  | 267.8017681 |
| H | -6.6610066 | 6.7344507  | 267.9176452 |
| H | -5.8728769 | 5.9016674  | 269.2996272 |
| H | -6.4952137 | 4.9459018  | 267.9213305 |
| C | -1.6305632 | 4.1938845  | 271.1341913 |
| C | -1.1745740 | 5.6415484  | 271.3855182 |
| H | -0.5196542 | 5.6860009  | 272.2795729 |
| H | -2.0299776 | 6.3222179  | 271.5792239 |
| H | -0.6217829 | 6.0720730  | 270.5250840 |
| C | -2.5762925 | 3.7515676  | 272.2678616 |
| H | -0.7248270 | 3.5535552  | 271.1720523 |
| H | -2.0919422 | 3.8979654  | 273.2550066 |
| H | -2.8578859 | 2.6847660  | 272.1852360 |
| H | -3.5118325 | 4.3495174  | 272.2529110 |
| H | 8.5740362  | 5.2360492  | 266.8883594 |
| H | 7.7835258  | 1.7055040  | 271.4776695 |
| H | 5.8350319  | 0.6180727  | 263.8813104 |
| C | 8.3216311  | 5.0932214  | 267.9627058 |
| H | 4.8934343  | 2.2939288  | 272.6710247 |
| H | 8.4057896  | 7.2440488  | 268.4142340 |
| H | 4.1670381  | 2.5472751  | 263.7876747 |
| C | 7.3302909  | 3.9368260  | 268.0332178 |
| C | 6.9465131  | 0.9984139  | 271.2988797 |
| C | 7.6830232  | 6.4029030  | 268.4643735 |

|   |            |           |             |
|---|------------|-----------|-------------|
| H | 7.3420576  | 6.3072585 | 269.5161058 |
| C | 6.9656007  | 3.3622246 | 269.2623119 |
| C | 6.2671954  | 1.0417267 | 264.8115385 |
| H | 10.0933221 | 3.8505388 | 268.3490779 |
| C | 6.7324194  | 3.4282416 | 266.8681038 |
| C | 9.6320087  | 4.7919768 | 268.7090425 |
| H | 10.3648321 | 5.6128564 | 268.5664989 |
| H | 7.0202076  | 3.8612021 | 265.8953666 |
| C | 5.1573117  | 2.7681225 | 271.7036367 |
| H | 6.7015337  | 0.5181231 | 272.2688597 |
| H | 7.3142720  | 0.2127626 | 270.6075305 |
| C | 6.0313577  | 2.3172167 | 269.3528884 |
| C | 4.6216207  | 2.9700464 | 264.7065718 |
| C | 5.7912120  | 2.3806231 | 266.8999507 |
| H | 6.6627834  | 0.2030479 | 265.4194089 |
| H | 7.1310335  | 1.6775047 | 264.5249451 |
| C | 5.7145268  | 1.7226922 | 270.7234851 |
| C | 5.4390068  | 1.8224247 | 268.1595037 |
| C | 5.2136077  | 1.8577517 | 265.5844616 |
| H | 4.2500121  | 3.2560271 | 271.3044612 |
| H | 3.8237417  | 3.5150443 | 265.2427364 |
| H | 5.8944282  | 3.5695309 | 271.9174640 |
| H | 6.8016904  | 6.6762483 | 267.8498334 |
| H | 5.3860197  | 3.7061180 | 264.3810185 |
| H | 9.4639530  | 4.6871686 | 269.8009248 |
| H | 4.9286741  | 0.9520801 | 270.5843232 |
| H | 4.3787110  | 1.1722871 | 265.8349847 |
| H | 7.4140063  | 3.7467458 | 270.1916028 |
| H | 3.9504855  | 7.0972637 | 265.6785662 |
| H | 4.6168973  | 5.5044101 | 266.4601810 |
| H | 3.3839550  | 9.0660089 | 267.5384705 |
| H | 1.4390786  | 9.1575065 | 268.9171594 |

### 15l-ma; COSMO

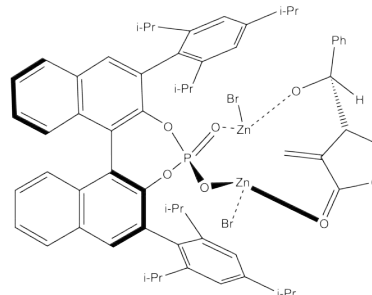

Energy (Hartree) = -11970.02745635

|   |            |            |            |
|---|------------|------------|------------|
| C | -0.0465794 | 1.1064210  | 89.3601733 |
| C | 0.8802887  | 0.1985351  | 89.8697521 |
| C | 0.5596028  | -0.4470893 | 91.1205541 |
| C | 1.4946957  | -1.2547839 | 91.8332407 |
| C | -0.7553666 | -0.2535775 | 91.6874983 |
| C | -1.0898983 | -0.9221044 | 92.9034806 |
| C | -1.6867309 | 0.6198974  | 91.0495602 |
| H | -2.6892835 | 0.7354098  | 91.4887791 |
| C | -1.3420275 | 1.3520516  | 89.9211215 |
| C | 4.2124864  | 0.7285926  | 88.0075765 |
| C | 4.5798656  | -0.5865856 | 87.7486412 |
| H | 5.5565794  | -0.7875197 | 87.2828436 |
| C | 3.7278010  | -1.6833193 | 88.0587176 |
| C | 4.0874493  | -3.0185592 | 87.7046549 |
| C | 2.4697182  | -1.4392558 | 88.7213763 |
| C | 1.5963626  | -2.5491266 | 88.9336362 |
| C | 2.1262727  | -0.0878624 | 89.1027801 |
| C | 2.9690375  | 0.9476643  | 88.6773169 |
| O | 0.2607722  | 1.7717357  | 88.1765936 |
| O | 2.6310038  | 2.2769220  | 88.9656888 |
| P | 1.3838217  | 2.9513500  | 88.1384015 |
| O | 0.9727455  | 4.2195052  | 88.8759097 |

|   |            |            |            |    |            |            |            |
|---|------------|------------|------------|----|------------|------------|------------|
| O | 1.7259360  | 3.0669499  | 86.6394533 | H  | 7.5324047  | 0.5189634  | 89.9717821 |
| C | -0.1640334 | -1.7204527 | 93.5593656 | C  | 5.9387864  | 2.4164896  | 88.7095815 |
| C | 1.1428863  | -1.8743265 | 93.0251971 | C  | 3.8868569  | 2.8793737  | 84.2427542 |
| H | -2.0984515 | -0.7770636 | 93.3215741 | C  | 5.2576566  | 2.3401224  | 86.3416884 |
| H | -0.4349969 | -2.2229622 | 94.5003749 | H  | 5.3636101  | -0.1740074 | 85.0851844 |
| H | 2.5105175  | -1.3771138 | 91.4313248 | H  | 6.0163772  | 1.0547914  | 83.9579683 |
| H | 1.8845464  | -2.4857636 | 93.5614669 | C  | 5.8416439  | 1.9149135  | 90.1490567 |
| C | 1.9655385  | -3.8336392 | 88.5583513 | C  | 5.1373405  | 1.8610920  | 87.6762561 |
| C | 3.2278655  | -4.0774142 | 87.9542293 | C  | 4.3774333  | 1.7921419  | 85.2172548 |
| H | 0.6111123  | -2.3791650 | 89.3882384 | H  | 4.3722647  | 3.4456995  | 90.7223092 |
| H | 1.2692575  | -4.6695113 | 88.7256328 | H  | 3.5509086  | 3.7962890  | 84.7758957 |
| H | 3.5124957  | -5.1019204 | 87.6701341 | H  | 6.0541192  | 3.8155109  | 91.2317717 |
| H | 5.0580532  | -3.1879305 | 87.2126019 | H  | 6.3780928  | 6.3757977  | 86.0049712 |
| C | -2.2727041 | 3.6948566  | 89.9356882 | H  | 4.6817825  | 3.2189240  | 83.5473064 |
| C | -2.1338757 | 2.4408965  | 89.2734685 | H  | 8.9384293  | 5.4370659  | 88.6603008 |
| C | -2.6213928 | 4.8165657  | 89.1612794 | H  | 5.1074586  | 1.0846342  | 90.1635632 |
| C | -2.4917595 | 2.3113335  | 87.9021111 | H  | 3.4778497  | 1.3549494  | 85.6971219 |
| C | -2.8325829 | 3.4643231  | 87.1766244 | H  | 7.4658855  | 3.8695907  | 89.1960304 |
| C | -2.8319011 | 4.7370006  | 87.7733924 | Zn | 1.3587907  | 6.0087919  | 89.5892634 |
| H | -2.6636361 | 5.8056918  | 89.6380896 | Br | -0.3182414 | 7.6229419  | 89.8166330 |
| C | -2.5261358 | 0.9472656  | 87.2151925 | C  | 7.9184228  | 7.8756221  | 90.5029731 |
| H | -3.0535116 | 3.3696841  | 86.1024122 | C  | 3.7110134  | 7.6047474  | 89.3832898 |
| C | -1.8373689 | 0.9280235  | 85.8415612 | C  | 7.1788738  | 6.7147395  | 90.7795554 |
| H | -2.3723809 | 1.5505860  | 85.0955467 | C  | 5.9273379  | 8.8890721  | 89.5337367 |
| H | -1.8055467 | -0.1058240 | 85.4405340 | C  | 5.1835403  | 7.7187604  | 89.7920119 |
| H | -0.7981108 | 1.3038058  | 85.9063406 | C  | 7.2841575  | 8.9672896  | 89.8830524 |
| C | -3.9834901 | 0.4529880  | 87.1179096 | C  | 5.8205141  | 6.6406936  | 90.4284815 |
| H | -1.9867110 | 0.2282562  | 87.8669682 | O  | 3.1743776  | 6.4086548  | 89.8265259 |
| H | -4.5895773 | 1.1344137  | 86.4845578 | H  | 8.9840556  | 7.9346657  | 90.7730047 |
| H | -4.4621131 | 0.4092176  | 88.1173009 | H  | 5.4414453  | 9.7553793  | 89.0538309 |
| H | -4.0284328 | -0.5604501 | 86.6673346 | H  | 7.6632713  | 5.8577032  | 91.2749897 |
| C | -2.9191306 | 6.0029250  | 86.9322707 | H  | 7.8513904  | 9.8871790  | 89.6717649 |
| C | -1.5490221 | 6.2411678  | 86.2623888 | H  | 5.2209960  | 5.7447149  | 90.6352992 |
| H | -1.5229065 | 7.1997370  | 85.7044884 | H  | 1.5916680  | 8.7474781  | 88.1307587 |
| H | -1.3216502 | 5.4277229  | 85.5385656 | Br | -0.1047241 | 3.4237103  | 83.2952259 |
| H | -0.7449627 | 6.2726497  | 87.0243785 | Zn | 1.1700571  | 4.0452940  | 85.0849997 |
| C | -4.0543388 | 5.9906551  | 85.8980729 | C  | 3.5774563  | 7.8039192  | 87.8014284 |
| H | -3.0946868 | 6.8495180  | 87.6313033 | C  | 2.3700634  | 8.6498167  | 87.3446021 |
| H | -4.1059999 | 6.9615705  | 85.3641074 | C  | 3.3429342  | 6.5051745  | 87.0844901 |
| H | -5.0374494 | 5.8081581  | 86.3773286 | C  | 3.9220454  | 5.3092696  | 87.3395394 |
| H | -3.8996198 | 5.2047721  | 85.1295336 | C  | 2.2419748  | 6.7014594  | 86.1361564 |
| C | -1.9884764 | 3.8508056  | 91.4347639 | O  | 1.7384746  | 7.9265237  | 86.2389690 |
| C | -0.4884508 | 4.0146181  | 91.7468558 | O  | 1.7554908  | 5.9168686  | 85.2918756 |
| H | -0.3166353 | 4.0349038  | 92.8424723 | H  | 2.6342765  | 9.6528486  | 86.9620015 |
| H | -0.1238427 | 4.9807619  | 91.3369522 | H  | 4.7122722  | 5.2042173  | 88.0924533 |
| H | 0.1270148  | 3.2031620  | 91.3141250 | H  | 3.6075843  | 4.4025849  | 86.8103822 |
| C | -2.7907938 | 4.9867134  | 92.0890707 | H  | 4.5145672  | 8.2668002  | 87.4299987 |
| H | -2.3109012 | 2.9083963  | 91.9227312 | H  | 3.1821595  | 8.4914006  | 89.8256716 |
| H | -2.6739013 | 4.9480591  | 93.1912547 |    |            |            |            |
| H | -3.8718453 | 4.9137938  | 91.8543462 |    |            |            |            |
| H | -2.4334897 | 5.9836347  | 91.7580919 |    |            |            |            |
| H | 8.3348663  | 4.8336125  | 85.6879737 |    |            |            |            |
| H | 7.9737734  | 2.1083090  | 90.6712112 |    |            |            |            |
| H | 4.4297233  | 0.2817422  | 83.6259906 |    |            |            |            |
| C | 7.9801174  | 5.0400365  | 86.7227597 |    |            |            |            |
| H | 5.1150739  | 2.5731484  | 92.1074014 |    |            |            |            |
| H | 7.9297019  | 7.2068276  | 86.3641650 |    |            |            |            |
| H | 3.0567345  | 2.4944788  | 83.6147538 |    |            |            |            |
| C | 7.0154843  | 3.9116961  | 87.0761209 |    |            |            |            |
| C | 7.1800070  | 1.3329152  | 90.6375220 |    |            |            |            |
| C | 7.2464082  | 6.3973892  | 86.6943418 |    |            |            |            |
| H | 6.8739359  | 6.6639811  | 87.7050670 |    |            |            |            |
| C | 6.8558301  | 3.4370697  | 88.3894256 |    |            |            |            |
| C | 5.0864873  | 0.6739134  | 84.4297928 |    |            |            |            |
| H | 9.7288675  | 4.1336023  | 87.7087100 |    |            |            |            |
| C | 6.2053978  | 3.3450850  | 86.0717125 |    |            |            |            |
| C | 9.2124066  | 5.1120749  | 87.6352498 |    |            |            |            |
| H | 9.9364165  | 5.8557991  | 87.2452558 |    |            |            |            |
| H | 6.3157619  | 3.7158073  | 85.0396933 |    |            |            |            |
| C | 5.3131592  | 3.0001950  | 91.1028933 |    |            |            |            |
| H | 7.0750373  | 0.9187599  | 91.6615503 |    |            |            |            |

### 15l-ma

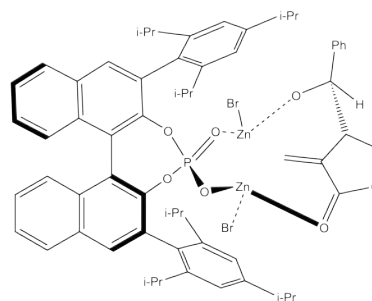

Energy (Hartree) = -11970.01693138

|   |            |            |            |
|---|------------|------------|------------|
| C | -0.0438157 | 1.1026741  | 89.3537934 |
| C | 0.8854462  | 0.1975348  | 89.8635830 |
| C | 0.5705184  | -0.4425688 | 91.1185985 |
| C | 1.5078743  | -1.2478220 | 91.8305085 |
| C | -0.7416786 | -0.2457877 | 91.6903803 |
| C | -1.0705356 | -0.9094361 | 92.9100370 |
| C | -1.6745481 | 0.6261244  | 91.0530828 |
| H | -2.6753201 | 0.7444481  | 91.4956294 |

|   |            |            |            |    |            |            |            |
|---|------------|------------|------------|----|------------|------------|------------|
| C | -1.3359479 | 1.3544310  | 89.9203121 | H  | 3.0687030  | 2.5019449  | 83.5977238 |
| C | 4.2146558  | 0.7252658  | 87.9952077 | C  | 7.0125820  | 3.9148252  | 87.0743098 |
| C | 4.5850033  | -0.5904293 | 87.7445781 | C  | 7.1822954  | 1.3258325  | 90.6264347 |
| H | 5.5639531  | -0.7902240 | 87.2828791 | C  | 7.2358671  | 6.4028994  | 86.7039619 |
| C | 3.7351865  | -1.6873080 | 88.0590275 | H  | 6.8620199  | 6.6633721  | 87.7157407 |
| C | 4.0970912  | -3.0236867 | 87.7136706 | C  | 6.8535877  | 3.4354858  | 88.3855684 |
| C | 2.4765786  | -1.4418524 | 88.7197550 | C  | 5.0839553  | 0.6684390  | 84.4279156 |
| C | 1.6060692  | -2.5522626 | 88.9391123 | H  | 9.7233740  | 4.1423178  | 87.7107439 |
| C | 2.1295804  | -0.0893064 | 89.0935632 | C  | 6.2047896  | 3.3495089  | 86.0677997 |
| C | 2.9690682  | 0.9461747  | 88.6606274 | C  | 9.2052074  | 5.1198858  | 87.6396627 |
| O | 0.2598861  | 1.7599919  | 88.1651049 | H  | 9.9284405  | 5.8659878  | 87.2529489 |
| O | 2.6308695  | 2.2761645  | 88.9402335 | H  | 6.3147202  | 3.7240697  | 85.0371701 |
| P | 1.3730720  | 2.9482441  | 88.1257936 | C  | 5.3098052  | 2.9862628  | 91.0953241 |
| O | 0.9594899  | 4.2066210  | 88.8780474 | H  | 7.0793893  | 0.9085365  | 91.6493754 |
| O | 1.7027631  | 3.0819966  | 86.6255239 | H  | 7.5376988  | 0.5151562  | 89.9585550 |
| C | -0.1430225 | -1.7057542 | 93.5649187 | C  | 5.9394391  | 2.4113211  | 88.7012396 |
| C | 1.1608597  | -1.8625482 | 93.0258646 | C  | 3.8999795  | 2.8825463  | 84.2265645 |
| H | -2.0770003 | -0.7617908 | 93.3321972 | C  | 5.2592107  | 2.3415538  | 86.3329450 |
| H | -0.4104866 | -2.2042194 | 94.5089976 | H  | 5.3482013  | -0.1807181 | 85.0867582 |
| H | 2.5213256  | -1.3721654 | 91.4235724 | H  | 6.0208997  | 1.0388855  | 83.9618745 |
| H | 1.9044591  | -2.4724763 | 93.5610453 | C  | 5.8424887  | 1.9052636  | 90.1391867 |
| C | 1.9781978  | -3.8378981 | 88.5723691 | C  | 5.1396965  | 1.8580513  | 87.6657132 |
| C | 3.2404226  | -4.0826416 | 87.9698212 | C  | 4.3797571  | 1.7956572  | 85.2067062 |
| H | 0.6209603  | -2.3803983 | 89.3931068 | H  | 4.3659044  | 3.4276460  | 90.7177942 |
| H | 1.2837574  | -4.6740949 | 88.7452005 | H  | 3.5602139  | 3.7990401  | 84.7548460 |
| H | 3.5274724  | -5.1081194 | 87.6919509 | H  | 6.0459830  | 3.8058809  | 91.2235027 |
| H | 5.0678891  | -3.1939134 | 87.2222876 | H  | 6.3677478  | 6.3815468  | 86.0143655 |
| C | -2.2670365 | 3.6974376  | 89.9366390 | H  | 4.7016399  | 3.2118786  | 83.5336329 |
| C | -2.1280021 | 2.4437719  | 89.2740800 | H  | 8.9297459  | 5.4419712  | 88.6651819 |
| C | -2.6092431 | 4.8203347  | 89.1615195 | H  | 5.1108333  | 1.0726711  | 90.1505923 |
| C | -2.4826104 | 2.3159221  | 87.9014784 | H  | 3.4750310  | 1.3669632  | 85.6851786 |
| C | -2.8149540 | 3.4703556  | 87.1751901 | H  | 7.4614407  | 3.8674352  | 89.1941002 |
| C | -2.8120131 | 4.7424848  | 87.7729352 | Zn | 1.3440886  | 6.0094019  | 89.5535626 |
| H | -2.6515195 | 5.8091287  | 89.6387102 | Br | -0.3192322 | 7.6307664  | 89.7733701 |
| C | -2.5256968 | 0.9512628  | 87.2162543 | C  | 7.9002918  | 7.8568815  | 90.5252940 |
| H | -3.0319251 | 3.3773585  | 86.0999937 | C  | 3.6978354  | 7.5959544  | 89.3868618 |
| C | -1.8465543 | 0.9257114  | 85.8382271 | C  | 7.1522900  | 6.7036299  | 90.8096085 |
| H | -2.3820357 | 1.5489109  | 85.0932820 | C  | 5.9204801  | 8.8722936  | 89.5384138 |
| H | -1.8226120 | -0.1086534 | 85.4383327 | C  | 5.1686118  | 7.7089421  | 89.8025912 |
| H | -0.8045206 | 1.2948566  | 85.8937703 | C  | 7.2756795  | 8.9464098  | 89.8932120 |
| C | -3.9860116 | 0.4637124  | 87.1304745 | C  | 5.7954951  | 6.6337813  | 90.4532894 |
| H | -1.9853443 | 0.2308956  | 87.8659798 | O  | 3.1592098  | 6.4011461  | 89.8238454 |
| H | -4.5934605 | 1.1472978  | 86.5010990 | H  | 8.9646881  | 7.9126041  | 90.8005333 |
| H | -4.4578690 | 0.4247456  | 88.1330696 | H  | 5.4416683  | 9.7380501  | 89.0501858 |
| H | -4.0399223 | -0.5500197 | 86.6816549 | H  | 7.6284285  | 5.8492308  | 91.3174080 |
| C | -2.8904238 | 6.0086692  | 86.9317180 | H  | 7.8490822  | 9.8612168  | 89.6771984 |
| C | -1.5275019 | 6.2230745  | 86.2401276 | H  | 5.1867827  | 5.7460459  | 90.6684103 |
| H | -1.4868210 | 7.1854958  | 85.6902445 | H  | 1.5879756  | 8.7442527  | 88.1193298 |
| H | -1.3328729 | 5.4123792  | 85.5030788 | Br | -0.1319261 | 3.4222521  | 83.2815210 |
| H | -0.7115464 | 6.2315490  | 86.9900615 | Zn | 1.0830235  | 4.0660710  | 85.0953946 |
| C | -4.0423846 | 6.0143350  | 85.9162909 | C  | 3.5739751  | 7.7982437  | 87.8016296 |
| H | -3.0388463 | 6.8587789  | 87.6325481 | C  | 2.3708861  | 8.6471595  | 87.3368904 |
| H | -4.0853180 | 6.9836633  | 85.3787120 | C  | 3.3382644  | 6.5010457  | 87.0826509 |
| H | -5.0203040 | 5.8519306  | 86.4126158 | C  | 3.9111836  | 5.3023810  | 87.3406446 |
| H | -3.9153864 | 5.2226816  | 85.1487837 | C  | 2.2414764  | 6.6997180  | 86.1291757 |
| C | -1.9886933 | 3.8547047  | 91.4366715 | O  | 1.7454129  | 7.9299531  | 86.2262287 |
| C | -0.4918939 | 4.0362694  | 91.7546981 | O  | 1.7566443  | 5.9134216  | 85.2877414 |
| H | -0.3231297 | 4.0456694  | 92.8509819 | H  | 2.6397241  | 9.6515342  | 86.9590944 |
| H | -0.1409113 | 5.0134801  | 91.3590991 | H  | 4.6979233  | 5.1936998  | 88.0967690 |
| H | 0.1358343  | 3.2383375  | 91.3144716 | H  | 3.5936195  | 4.3985192  | 86.8080897 |
| C | -2.8067317 | 4.9808763  | 92.0885175 | H  | 4.5168920  | 8.2564622  | 87.4385642 |
| H | -2.3014015 | 2.9081868  | 91.9228138 | H  | 3.1658319  | 8.4822446  | 89.8275861 |
| H | -2.6954462 | 4.9428549  | 93.1913102 |    |            |            |            |
| H | -3.8854732 | 4.8969016  | 91.8476917 |    |            |            |            |
| H | -2.4582080 | 5.9819941  | 91.7613208 |    |            |            |            |
| H | 8.3300258  | 4.8466179  | 85.6908705 |    |            |            |            |
| H | 7.9742457  | 2.1028697  | 90.6620048 |    |            |            |            |
| H | 4.4298189  | 0.2798234  | 83.6203083 |    |            |            |            |
| C | 7.9736571  | 5.0478007  | 86.7263003 |    |            |            |            |
| H | 5.1154927  | 2.5577039  | 92.0998923 |    |            |            |            |
| H | 7.9158616  | 7.2168940  | 86.3782916 |    |            |            |            |

15l-mi; COSMO

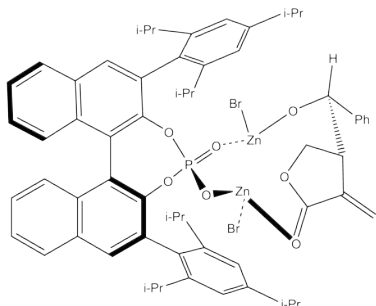

Energy (Hartree) = -11970.04301319

|   |            |            |             |
|---|------------|------------|-------------|
| C | 0.3346561  | 1.6504020  | 269.4380290 |
| C | 0.8802055  | 0.3685387  | 269.5915722 |
| C | 0.1859979  | -0.5559439 | 270.4581074 |
| C | 0.7308139  | -1.8221394 | 270.8316713 |
| C | -1.0962923 | -0.1807932 | 271.0049154 |
| C | -1.8012328 | -1.1041790 | 271.8347297 |
| C | -1.6202761 | 1.1160185  | 270.7406361 |
| H | -2.5997195 | 1.3913251  | 271.1611982 |
| C | -0.9093911 | 2.0576572  | 270.0060420 |
| C | 4.5637271  | 0.5427350  | 268.5000339 |
| C | 4.7007461  | -0.6571960 | 267.8112539 |
| H | 5.6796334  | -0.9293598 | 267.3893649 |
| C | 3.5905777  | -1.5172023 | 267.5655085 |
| C | 3.7352834  | -2.6874909 | 266.7613405 |
| C | 2.2850777  | -1.1728114 | 268.0765132 |
| C | 1.1731751  | -1.9800957 | 267.6948588 |
| C | 2.1555732  | -0.0062716 | 268.9152873 |
| C | 3.2780705  | 0.8086393  | 269.0694468 |
| O | 0.9800243  | 2.5976521  | 268.6434514 |
| O | 3.1464617  | 1.9695650  | 269.8310783 |
| P | 2.4391151  | 3.2326733  | 269.0713383 |
| O | 2.3504446  | 4.3492383  | 270.1066735 |
| O | 3.1150549  | 3.5431615  | 267.7237683 |
| C | -1.2558530 | -2.3390381 | 272.1511290 |
| C | 0.0287898  | -2.6902155 | 271.6566586 |
| H | -2.7839552 | -0.8065726 | 272.2331416 |
| H | -1.8063931 | -3.0394845 | 272.7974508 |
| H | 1.7276337  | -2.1058610 | 270.4675062 |
| H | 0.4759591  | -3.6569346 | 271.9343761 |
| C | 1.3444272  | -3.0995184 | 266.8919555 |
| C | 2.6372348  | -3.4689151 | 266.4339804 |
| H | 0.1665051  | -1.6986338 | 268.0335612 |
| H | 0.4694108  | -3.7014611 | 266.6027749 |
| H | 2.7619345  | -4.3633627 | 265.8047395 |
| H | 4.7380070  | -2.9460944 | 266.3860901 |
| C | -1.4056830 | 4.3547588  | 270.9222385 |
| C | -1.4213905 | 3.4526402  | 269.8242649 |
| C | -1.9977096 | 5.6227879  | 270.7583939 |
| C | -1.9529181 | 3.8611938  | 268.5698019 |
| C | -2.5097911 | 5.1469829  | 268.4549882 |
| C | -2.5619360 | 6.0395530  | 269.5419114 |
| H | -2.0240531 | 6.3136453  | 271.6172399 |
| C | -1.9828439 | 2.9186876  | 267.3685018 |
| H | -2.9361199 | 5.4544367  | 267.4868704 |
| C | -1.4689824 | 3.5865681  | 266.0835986 |
| H | -2.1593563 | 4.3755683  | 265.7177214 |
| H | -1.3577826 | 2.8384207  | 265.2729544 |
| H | -0.4795682 | 4.0578473  | 266.2471105 |
| C | -3.3903938 | 2.3232525  | 267.1791301 |
| H | -1.2993175 | 2.0727733  | 267.5816617 |
| H | -4.1346001 | 3.1198418  | 266.9675549 |
| H | -3.7229480 | 1.7848770  | 268.0900887 |
| H | -3.4058790 | 1.6071661  | 266.3314270 |
| C | -3.2301485 | 7.4036848  | 269.4144170 |
| C | -2.6018494 | 8.2619683  | 268.3032862 |

|    |            |            |             |
|----|------------|------------|-------------|
| H  | -3.0754156 | 9.2646905  | 268.2650830 |
| H  | -2.7336580 | 7.7939915  | 267.3051446 |
| H  | -1.5164048 | 8.4016061  | 268.4760032 |
| C  | -4.7509484 | 7.2591083  | 269.2187495 |
| H  | -3.0652560 | 7.9340772  | 270.3784436 |
| H  | -5.2433097 | 8.2532414  | 269.1869017 |
| H  | -5.2088042 | 6.6728844  | 270.0408788 |
| H  | -4.9819834 | 6.7381752  | 268.2658193 |
| C  | -0.7697700 | 3.9949608  | 272.2651743 |
| C  | 0.2563753  | 5.0456051  | 272.7266061 |
| H  | 0.7541379  | 4.7138851  | 273.6607731 |
| H  | -0.2173296 | 6.0268335  | 272.9382798 |
| H  | 1.0445929  | 5.1947877  | 271.9652117 |
| C  | -1.8417710 | 3.7518189  | 273.3437433 |
| H  | -0.2153156 | 3.0443629  | 272.1246994 |
| H  | -1.3727041 | 3.4549417  | 274.3045806 |
| H  | -2.5479397 | 2.9506141  | 273.0458316 |
| H  | -2.4372373 | 4.6707179  | 273.5283634 |
| H  | 8.2931943  | 5.5027633  | 267.6625892 |
| H  | 7.8953421  | 1.2984796  | 271.7932541 |
| H  | 6.1419374  | 0.6260469  | 264.2669227 |
| C  | 7.9994977  | 5.2662633  | 268.7096796 |
| H  | 4.9813559  | 1.7077545  | 273.1139389 |
| H  | 7.5598377  | 7.3822403  | 269.1230422 |
| H  | 4.4542902  | 2.6543986  | 264.2206586 |
| C  | 7.2435643  | 3.9453468  | 268.6625743 |
| C  | 7.0594826  | 0.5999291  | 271.5783003 |
| C  | 7.0647237  | 6.3913360  | 269.1976348 |
| H  | 6.7788028  | 6.2397521  | 270.2602501 |
| C  | 6.8893296  | 3.2529041  | 269.8338963 |
| C  | 6.5355489  | 0.9831858  | 265.2411668 |
| H  | 9.9617090  | 4.3962966  | 269.1946108 |
| C  | 6.8049908  | 3.4208103  | 267.4368496 |
| C  | 9.2840733  | 5.1985921  | 269.5508141 |
| H  | 9.8339299  | 6.1611256  | 269.5037466 |
| H  | 7.0832358  | 3.9529973  | 266.5131838 |
| C  | 5.2761640  | 2.2976458  | 272.2217421 |
| H  | 6.8516641  | 0.0246611  | 272.5044538 |
| H  | 7.4067110  | -0.1108666 | 270.8009266 |
| C  | 6.0905806  | 2.0957506  | 269.8061654 |
| C  | 5.0543073  | 3.0151617  | 265.0814055 |
| C  | 5.9833140  | 2.2823283  | 267.3514184 |
| H  | 6.8326378  | 0.0975253  | 265.8363419 |
| H  | 7.4552424  | 1.5736661  | 265.0451804 |
| C  | 5.8039761  | 1.3666193  | 271.1173796 |
| C  | 5.6063175  | 1.6158512  | 268.5552051 |
| C  | 5.4872566  | 1.8395411  | 265.9755281 |
| H  | 4.3933397  | 2.8713437  | 271.8801943 |
| H  | 4.4922176  | 3.7872889  | 265.6543423 |
| H  | 6.0420081  | 3.0295469  | 272.5509798 |
| H  | 6.1203003  | 6.4188647  | 268.6139607 |
| H  | 5.9150444  | 3.5737578  | 264.6579824 |
| H  | 9.0588403  | 5.0028550  | 270.6198067 |
| H  | 5.0202042  | 0.6072308  | 270.9191328 |
| H  | 4.5888714  | 1.2066453  | 266.1295728 |
| H  | 7.2307097  | 3.6349599  | 270.8082014 |
| Zn | 3.5797986  | 5.9329293  | 270.2264469 |
| Br | 4.4521632  | 6.3208722  | 272.3243815 |
| C  | 1.5645155  | 10.5964142 | 270.2831214 |
| C  | 2.5222272  | 10.0002301 | 269.4492202 |
| C  | 2.4481239  | 8.6292628  | 269.1315185 |
| C  | 1.3825923  | 7.8677498  | 269.6575705 |
| C  | 0.4317707  | 8.4602118  | 270.5055128 |
| C  | 0.5178797  | 9.8248319  | 270.8193338 |
| H  | 1.6447656  | 11.6659112 | 270.5327591 |
| H  | 3.3569426  | 10.6028346 | 269.0540039 |
| C  | 3.5067131  | 7.9685637  | 268.2546979 |
| H  | 1.2888228  | 6.8018199  | 269.3916565 |
| H  | -0.3805733 | 7.8428090  | 270.9143623 |
| H  | -0.2251225 | 10.2874271 | 271.4870205 |
| O  | 3.6484774  | 6.6061129  | 268.4712652 |

|    |            |           |             |
|----|------------|-----------|-------------|
| C  | 3.1897697  | 8.1507179 | 266.7238404 |
| C  | 1.9542634  | 7.3665821 | 266.3597135 |
| C  | 2.4307305  | 6.0668078 | 265.8567364 |
| O  | 3.7263360  | 6.1105204 | 265.5803872 |
| C  | 4.2722016  | 7.4309625 | 265.8948120 |
| O  | 1.7574076  | 5.0350450 | 265.6537075 |
| C  | 0.6467806  | 7.6661806 | 266.4979711 |
| H  | 4.4878791  | 7.9269799 | 264.9274960 |
| H  | 5.2104655  | 7.2580587 | 266.4536454 |
| Zn | 2.3560640  | 3.1515216 | 265.9860336 |
| Br | 1.6444840  | 1.2287017 | 264.9765236 |
| H  | -0.1241052 | 6.9231112 | 266.2389244 |
| H  | 0.3219441  | 8.6487370 | 266.8687578 |
| H  | 4.4665615  | 8.5312455 | 268.4246271 |
| H  | 3.1150336  | 9.2257164 | 266.4697112 |

## 15l-mi

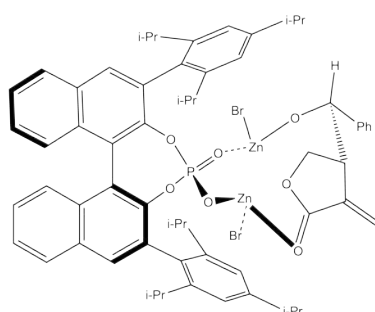

Energy (Hartree) = -11970.03166504

|   |            |            |             |
|---|------------|------------|-------------|
| C | 0.3383663  | 1.6676260  | 269.4611278 |
| C | 0.8792911  | 0.3814592  | 269.5934126 |
| C | 0.1843527  | -0.5534052 | 270.4482524 |
| C | 0.7263581  | -1.8266564 | 270.8002568 |
| C | -1.0946332 | -0.1830899 | 271.0051560 |
| C | -1.7983573 | -1.1165142 | 271.8238114 |
| C | -1.6160989 | 1.1177747  | 270.7588887 |
| H | -2.5938090 | 1.3916803  | 271.1845777 |
| C | -0.9055654 | 2.0672589  | 270.0345937 |
| C | 4.5623432  | 0.5457480  | 268.5011688 |
| C | 4.6883425  | -0.6437352 | 267.7926484 |
| H | 5.6655773  | -0.9162674 | 267.3672278 |
| C | 3.5719129  | -1.4908264 | 267.5326141 |
| C | 3.7061431  | -2.6476731 | 266.7083306 |
| C | 2.2699111  | -1.1462011 | 268.0517511 |
| C | 1.1520354  | -1.9397891 | 267.6600960 |
| C | 2.1499900  | 0.0087237  | 268.9078110 |
| C | 3.2779709  | 0.8133215  | 269.0722542 |
| O | 0.9825649  | 2.6282734  | 268.6807968 |
| O | 3.1524381  | 1.9678521  | 269.8454304 |
| P | 2.4584164  | 3.2388160  | 269.0888931 |
| O | 2.4149173  | 4.3733294  | 270.1080976 |
| O | 3.1232097  | 3.5311326  | 267.7298047 |
| C | -1.2559564 | -2.3571813 | 272.1193675 |
| C | 0.0248915  | -2.7046626 | 271.6143083 |
| H | -2.7784754 | -0.8217856 | 272.2306355 |
| H | -1.8061038 | -3.0653611 | 272.7574334 |
| H | 1.7206091  | -2.1071578 | 270.4270890 |
| H | 0.4701999  | -3.6768369 | 271.8751691 |
| C | 1.3140847  | -3.0461930 | 266.8381993 |
| C | 2.6026124  | -3.4157260 | 266.3703764 |
| H | 0.1485214  | -1.6566623 | 268.0063251 |
| H | 0.4343190  | -3.6369123 | 266.5408118 |
| H | 2.7198677  | -4.2993127 | 265.7247428 |
| H | 4.7060523  | -2.9059029 | 266.3255657 |
| C | -1.4075473 | 4.3546670  | 270.9701244 |
| C | -1.4207032 | 3.4621174  | 269.8649583 |

|   |            |            |             |
|---|------------|------------|-------------|
| C | -1.9998072 | 5.6234001  | 270.8153223 |
| C | -1.9539784 | 3.8784265  | 268.6141844 |
| C | -2.5112675 | 5.1646135  | 268.5089861 |
| C | -2.5630958 | 6.0494209  | 269.6019418 |
| H | -2.0275341 | 6.3073892  | 271.6797648 |
| C | -1.9821363 | 2.9457585  | 267.4052720 |
| H | -2.9396813 | 5.4777130  | 267.5433683 |
| C | -1.4171521 | 3.6096543  | 266.1400283 |
| H | -2.0751369 | 4.4217203  | 265.7643356 |
| H | -1.3045495 | 2.8677103  | 265.3239402 |
| H | -0.4199694 | 4.0515509  | 266.3332462 |
| C | -3.3998299 | 2.3906985  | 267.1758718 |
| H | -1.3279808 | 2.0792750  | 267.6278673 |
| H | -4.1180486 | 3.2077391  | 266.9533213 |
| H | -3.7694485 | 1.8543300  | 268.0733715 |
| H | -3.4136032 | 1.6825489  | 266.3216692 |
| C | -3.2326326 | 7.4138417  | 269.4850745 |
| C | -2.6076563 | 8.2815736  | 268.3794933 |
| H | -3.0838856 | 9.2832049  | 268.3477385 |
| H | -2.7396355 | 7.8202440  | 267.3782647 |
| H | -1.5226219 | 8.4233072  | 268.5529740 |
| C | -4.7536456 | 7.2689407  | 269.2927878 |
| H | -3.0654273 | 7.9378109  | 270.4523702 |
| H | -5.2484688 | 8.2620341  | 269.2693996 |
| H | -5.2079985 | 6.6751493  | 270.1110950 |
| H | -4.9869945 | 6.7541577  | 268.3372406 |
| C | -0.7716157 | 3.9846266  | 272.3100044 |
| C | 0.2886952  | 5.0087941  | 272.7535853 |
| H | 0.7770857  | 4.6760770  | 273.6922888 |
| H | -0.1531191 | 6.0077142  | 272.9515227 |
| H | 1.0785863  | 5.1215100  | 271.9867761 |
| C | -1.8408337 | 3.7758006  | 273.3979278 |
| H | -0.2453762 | 3.0180579  | 272.1714865 |
| H | -1.3728337 | 3.4685155  | 274.3558427 |
| H | -2.5715946 | 2.9938878  | 273.1079184 |
| H | -2.4100334 | 4.7103784  | 273.5858355 |
| H | 8.7794269  | 5.1763472  | 267.9086400 |
| H | 7.8837462  | 1.1970173  | 271.8224051 |
| H | 6.1887635  | 0.6805710  | 264.2804672 |
| C | 8.0945186  | 5.2002285  | 268.7868710 |
| H | 4.9670356  | 1.6036637  | 273.1366504 |
| H | 7.7122023  | 7.3448821  | 268.4646167 |
| H | 4.5182969  | 2.7247958  | 264.2571028 |
| C | 7.3002859  | 3.8990374  | 268.7463497 |
| C | 7.0425427  | 0.5116226  | 271.5877456 |
| C | 7.1432452  | 6.4015359  | 268.6004329 |
| H | 6.4959244  | 6.5217352  | 269.4940032 |
| C | 6.9188800  | 3.1965319  | 269.9003570 |
| C | 6.5780404  | 1.0196963  | 265.2628286 |
| H | 9.6154186  | 4.5129105  | 270.2222920 |
| C | 6.8625963  | 3.4008694  | 267.5063386 |
| C | 8.9471120  | 5.3805070  | 270.0489054 |
| H | 9.5782355  | 6.2881808  | 269.9634179 |
| H | 7.1672295  | 3.9358937  | 266.5921719 |
| C | 5.2709623  | 2.2107245  | 272.2592526 |
| H | 6.8248752  | -0.0817217 | 272.5000847 |
| H | 7.3880123  | -0.1846477 | 270.7967811 |
| C | 6.0989985  | 2.0528869  | 269.8434690 |
| C | 5.1117235  | 3.0665473  | 265.1307948 |
| C | 6.0190473  | 2.2842325  | 267.3926352 |
| H | 6.8662797  | 0.1228180  | 265.8454645 |
| H | 7.5037274  | 1.6058977  | 265.0831936 |
| C | 5.7966761  | 1.3001127  | 271.1375711 |
| C | 5.6173639  | 1.6042329  | 268.5824767 |
| C | 5.5312705  | 1.8708158  | 266.0046607 |
| H | 4.3950609  | 2.7988724  | 271.9256252 |
| H | 4.5431498  | 3.8247590  | 265.7132044 |
| H | 6.0392484  | 2.9308026  | 272.6072641 |
| H | 6.4698475  | 6.2593827  | 267.7315970 |
| H | 5.9793706  | 3.6279745  | 264.7253411 |
| H | 8.3095473  | 5.5120754  | 270.9476235 |



|    |            |            |             |   |             |             |              |
|----|------------|------------|-------------|---|-------------|-------------|--------------|
| H  | 5.0076730  | 0.5517781  | 270.9183234 | O | -34.7481329 | -55.4060668 | 3556.3036664 |
| H  | 4.6270742  | 1.2416826  | 266.1392736 | C | -38.1669576 | -61.7416003 | 3561.0662926 |
| H  | 7.2567347  | 3.5509687  | 270.8842555 | C | -36.8016562 | -61.8882767 | 3560.7040651 |
| Zn | 3.7617084  | 5.8808343  | 270.0943245 | H | -39.9381254 | -60.5066516 | 3560.9040314 |
| Br | 4.9333382  | 6.2197406  | 272.0416216 | H | -38.6409279 | -62.4775587 | 3561.7333364 |
| C  | 1.5372222  | 10.5618894 | 270.2030249 | H | -35.1333805 | -61.1005621 | 3559.5919426 |
| C  | 2.4877576  | 9.9745341  | 269.3558457 | H | -36.2172289 | -62.7303468 | 3561.1051368 |
| C  | 2.4451090  | 8.5950054  | 269.0714000 | C | -34.8190855 | -62.4237580 | 3556.2251739 |
| C  | 1.4213214  | 7.8142525  | 269.6468726 | C | -33.4274568 | -62.5498162 | 3555.9671054 |
| C  | 0.4777341  | 8.3986846  | 270.5082416 | H | -36.4028740 | -61.2004219 | 3557.0285134 |
| C  | 0.5304785  | 9.7723896  | 270.7865916 | H | -35.5055710 | -63.2303422 | 3555.9258030 |
| H  | 1.5921726  | 11.6387606 | 270.4260351 | H | -33.0391963 | -63.4588266 | 3555.4830814 |
| H  | 3.2927149  | 10.5920823 | 268.9232406 | H | -31.4893177 | -61.5908094 | 3556.0881826 |
| C  | 3.4873188  | 7.9465708  | 268.1649192 | C | -38.8393841 | -55.3266999 | 3559.7535964 |
| H  | 1.3616971  | 6.7390786  | 269.4133508 | C | -38.8783739 | -56.0959388 | 3558.5486278 |
| H  | -0.3021682 | 7.7660284  | 270.9550894 | C | -39.2025827 | -53.9713265 | 3559.6966423 |
| H  | -0.2070016 | 10.2287645 | 271.4645554 | C | -39.1977762 | -55.4707466 | 3557.3136486 |
| O  | 3.6358017  | 6.5840162  | 268.3528329 | C | -39.4849665 | -54.0862555 | 3557.2959092 |
| C  | 3.1226178  | 8.1501121  | 266.6463460 | C | -39.5456902 | -53.3197487 | 3558.4879137 |
| C  | 1.9053576  | 7.3257708  | 266.3123271 | C | -39.3260673 | -56.2665823 | 3556.0186556 |
| C  | 2.4157472  | 6.0450017  | 265.7910901 | H | -39.7432663 | -53.6036633 | 3556.3414849 |
| O  | 3.7004326  | 6.1426966  | 265.4676960 | C | -38.5093043 | -55.6709314 | 3554.8628289 |
| C  | 4.1989608  | 7.4816377  | 265.7687747 | H | -38.8527980 | -54.6532047 | 3554.5905184 |
| O  | 1.7787429  | 4.9899614  | 265.6060358 | H | -38.5920172 | -56.3014110 | 3553.9553732 |
| C  | 0.5933446  | 7.5752437  | 266.4966909 | H | -37.4339662 | -55.6184017 | 3555.1236308 |
| H  | 4.3541801  | 7.9936503  | 264.7971952 | C | -40.8136063 | -56.4095288 | 3555.6381192 |
| H  | 5.1671874  | 7.3511616  | 266.2870584 | H | -38.9383932 | -57.2868619 | 3556.2126101 |
| Zn | 2.3579721  | 3.1093355  | 266.0080832 | H | -41.2695112 | -55.4216977 | 3555.4172118 |
| Br | 1.6914746  | 1.2032623  | 264.9546896 | H | -41.3957172 | -56.8741677 | 3556.4592431 |
| H  | -0.1568199 | 6.8034334  | 266.2621341 | H | -40.9243743 | -57.0430354 | 3554.7344513 |
| H  | 0.2448665  | 8.5413139  | 266.8883973 | C | -40.1507380 | -51.9212198 | 3558.5442653 |
| H  | 4.4489683  | 8.5130662  | 268.3174554 | C | -39.8577867 | -51.0501228 | 3557.3235051 |
| H  | 3.0016752  | 9.2264530  | 266.4157883 | H | -40.2687459 | -50.0316337 | 3557.4605308 |

### 15n-ma; COSMO

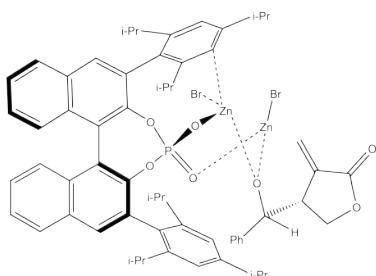

Energy (Hartree) = -11970.05908612

|   |             |             |              |   |             |             |              |
|---|-------------|-------------|--------------|---|-------------|-------------|--------------|
| C | -37.1028622 | -57.7965469 | 3558.0606276 | H | -32.3345054 | -55.4815661 | 3553.6392624 |
| C | -36.3392347 | -58.9137606 | 3558.4000761 | C | -29.7491762 | -54.8815172 | 3558.3735578 |
| C | -36.9183361 | -59.8696651 | 3559.3166492 | C | -30.9821202 | -57.8626048 | 3561.3663168 |
| C | -36.1926660 | -60.9752279 | 3559.8533726 | C | -29.0535461 | -52.7031274 | 3559.5091003 |
| C | -38.2884338 | -59.6858490 | 3559.7405157 | H | -29.2911779 | -53.0574255 | 3560.5337152 |
| C | -38.8899605 | -60.6540810 | 3560.5998713 | C | -30.4085353 | -55.4919549 | 3559.4556745 |
| C | -38.9848709 | -58.4931291 | 3559.3873249 | C | -30.4789414 | -57.3563539 | 3554.6498087 |
| H | -39.9860840 | -58.3176564 | 3559.8105689 | H | -27.0344906 | -55.3699154 | 3558.4417606 |
| C | -38.3868382 | -57.5055569 | 3558.6146138 | C | -30.1342015 | -55.2608368 | 3557.0772163 |
| C | -32.6607792 | -58.0314204 | 3557.7230743 | C | -27.3638254 | -54.5590118 | 3559.1222599 |
| C | -32.1885944 | -59.2380912 | 3557.2166955 | H | -26.5296179 | -53.8345830 | 3559.2271609 |
| H | -31.1135581 | -59.3443445 | 3557.0071612 | H | -29.6481556 | -54.7708256 | 3556.2182148 |
| C | -33.0560953 | -60.3274131 | 3556.9246584 | C | -32.8088023 | -56.0849756 | 3561.3327860 |
| C | -32.5662348 | -61.5175113 | 3556.3065680 | H | -31.4700783 | -58.3668806 | 3562.2259556 |
| C | -34.4608589 | -60.2189344 | 3557.2339117 | H | -30.4475429 | -58.6328677 | 3560.7739228 |
| C | -35.3229863 | -61.2884264 | 3556.8448011 |   |             |             |              |
| C | -34.9450405 | -59.0258824 | 3557.8854576 |   |             |             |              |
| C | -34.0514090 | -57.9533035 | 3558.0351500 |   |             |             |              |
| O | -36.5905436 | -56.8986024 | 3557.1330021 |   |             |             |              |
| O | -34.5031473 | -56.7367595 | 3558.5651376 |   |             |             |              |
| P | -35.4541548 | -55.8112578 | 3557.6090912 |   |             |             |              |
| O | -36.0436041 | -54.7136533 | 3558.5004500 |   |             |             |              |

|    |             |             |              |
|----|-------------|-------------|--------------|
| C  | -31.3864775 | -56.4868185 | 3559.2739530 |
| C  | -31.8645556 | -55.2400250 | 3554.6136776 |
| C  | -31.1266133 | -56.2301183 | 3556.8361739 |
| H  | -30.2813657 | -58.3238514 | 3555.1527268 |
| H  | -29.5155347 | -56.8071446 | 3554.5922816 |
| C  | -32.0244241 | -57.1225229 | 3560.5081049 |
| C  | -31.7283104 | -56.8810446 | 3557.9495426 |
| C  | -31.5408578 | -56.5260616 | 3555.3944195 |
| H  | -33.5708711 | -55.5775615 | 3560.7094374 |
| H  | -32.5654074 | -54.5958401 | 3555.1778834 |
| H  | -32.1363821 | -55.3093805 | 3561.7554858 |
| H  | -29.9480126 | -52.1759197 | 3559.1206146 |
| H  | -30.9560507 | -54.6375500 | 3554.4065758 |
| H  | -27.5470955 | -55.0111454 | 3560.1197066 |
| H  | -32.7516074 | -57.8846173 | 3560.1629534 |
| H  | -32.4755516 | -57.1217860 | 3555.4355220 |
| H  | -30.1390283 | -55.1991751 | 3560.4830818 |
| Zn | -37.1090243 | -53.0683894 | 3558.0603801 |
| Br | -36.6989395 | -51.2897706 | 3559.5525234 |
| C  | -31.5259918 | -52.0595349 | 3556.3393993 |
| C  | -35.8355914 | -51.4063469 | 3556.0009857 |
| C  | -32.0286362 | -51.3796586 | 3555.2205455 |
| C  | -33.7846747 | -52.2812832 | 3557.2051829 |
| C  | -34.3133533 | -51.5971751 | 3556.0805339 |
| C  | -32.4102180 | -52.5191698 | 3557.3284633 |
| C  | -33.4083381 | -51.1551454 | 3555.0879924 |
| O  | -36.4624982 | -52.6866284 | 3556.1976256 |
| H  | -30.4462929 | -52.2480513 | 3556.4341582 |
| H  | -34.4587008 | -52.6276505 | 3558.0014760 |
| H  | -31.3451108 | -51.0294130 | 3554.4324551 |
| H  | -32.0300269 | -53.0784637 | 3558.1963520 |
| H  | -33.7695903 | -50.6367906 | 3554.1891308 |
| Br | -35.2237044 | -54.0082202 | 3552.8564437 |
| Zn | -35.3366524 | -53.9353222 | 3555.1614354 |
| H  | -35.3129462 | -48.9040963 | 3555.4866174 |
| C  | -36.2857253 | -50.7425129 | 3554.6694691 |
| C  | -36.0277565 | -49.2162691 | 3554.7001200 |
| C  | -37.7680784 | -50.7887718 | 3554.4253274 |
| C  | -38.5149095 | -51.7977373 | 3553.9401882 |
| C  | -38.3351497 | -49.4447151 | 3554.7530599 |
| O  | -37.2941528 | -48.5865257 | 3554.9892924 |
| O  | -39.4946738 | -49.0921181 | 3554.8200761 |
| H  | -35.6637295 | -48.8406874 | 3553.7207138 |
| H  | -39.2033279 | -53.3733562 | 3560.6209900 |
| H  | -36.1479697 | -50.7424811 | 3556.8424684 |
| H  | -35.7571150 | -51.2396010 | 3553.8313489 |
| H  | -39.5979601 | -51.6548370 | 3553.7960376 |
| H  | -38.0583153 | -52.7566903 | 3553.6536476 |

|   |             |             |              |
|---|-------------|-------------|--------------|
| C | -32.6396634 | -58.0143569 | 3557.7423391 |
| C | -32.1637016 | -59.2257727 | 3557.2508424 |
| H | -31.0869229 | -59.3300657 | 3557.0492881 |
| C | -33.0277465 | -60.3159571 | 3556.9559443 |
| C | -32.5338055 | -61.5096835 | 3556.3490798 |
| C | -34.4353317 | -60.2019724 | 3557.2474194 |
| C | -35.2951420 | -61.2701399 | 3556.8501350 |
| C | -34.9237057 | -59.0063869 | 3557.8915119 |
| C | -34.0319666 | -57.9324681 | 3558.0452106 |
| O | -36.5677023 | -56.8749963 | 3557.1369850 |
| O | -34.4839371 | -56.7165663 | 3558.5730414 |
| P | -35.4431550 | -55.7814758 | 3557.6336384 |
| O | -36.0511765 | -54.7143188 | 3558.5493367 |
| O | -34.7408378 | -55.3368410 | 3556.3401547 |
| C | -38.1637855 | -61.7546194 | 3561.0188521 |
| C | -36.7916682 | -61.8853774 | 3560.6790859 |
| H | -39.9438877 | -60.5369271 | 3560.8321896 |
| H | -38.6413537 | -62.4980044 | 3561.6749250 |
| H | -35.1137220 | -61.0754613 | 3559.5976918 |
| H | -36.2050323 | -62.7227087 | 3561.0866660 |
| C | -34.7868707 | -62.4089431 | 3556.2415892 |
| C | -33.3928859 | -62.5406353 | 3556.0026426 |
| H | -36.3768334 | -61.1775997 | 3557.0194928 |
| H | -35.4721811 | -63.2140258 | 3555.9357574 |
| H | -33.0010267 | -63.4524182 | 3555.5269430 |
| H | -31.4545057 | -61.5859763 | 3556.1439360 |
| C | -38.8962435 | -55.3507229 | 3559.7370994 |
| C | -38.8943687 | -56.1064190 | 3558.5229840 |
| C | -39.2855185 | -54.0026348 | 3559.6865682 |
| C | -39.2034071 | -55.4734950 | 3557.2897011 |
| C | -39.5183714 | -54.0955136 | 3557.2825936 |
| C | -39.6189011 | -53.3454534 | 3558.4797453 |
| C | -39.2954861 | -56.2546592 | 3555.9820431 |
| H | -39.7632906 | -53.6058531 | 3556.3283111 |
| C | -38.4416250 | -55.6482919 | 3554.8591022 |
| H | -38.7369858 | -54.6064678 | 3554.6237130 |
| H | -38.5325640 | -56.2371779 | 3553.9249211 |
| H | -37.3695367 | -55.6555066 | 3555.1366322 |
| C | -40.7709640 | -56.3888151 | 3555.5546673 |
| H | -38.9162759 | -57.2785178 | 3556.1757239 |
| H | -41.2166997 | -55.3982951 | 3555.3257893 |
| H | -41.3805984 | -56.8549873 | 3556.3545871 |
| H | -40.8580992 | -57.0162342 | 3554.6441557 |
| C | -40.2378938 | -51.9538885 | 3558.5365212 |
| C | -39.9362334 | -51.0750079 | 3557.3238398 |
| H | -40.3398699 | -50.0540632 | 3557.4622369 |
| H | -40.3804474 | -51.4700260 | 3556.3883873 |
| H | -38.8450253 | -50.9764807 | 3557.1626648 |
| C | -41.7570391 | -52.0988228 | 3558.7635822 |
| H | -39.8002333 | -51.4567351 | 3559.4287626 |
| H | -42.2255576 | -51.1007125 | 3558.8820541 |
| H | -41.9807770 | -52.6960641 | 3559.6704631 |
| H | -42.2400074 | -52.6013730 | 3557.8994991 |
| C | -38.4405980 | -55.9051668 | 3561.0870750 |
| C | -37.2473622 | -55.1107768 | 3561.6522537 |
| H | -36.9089463 | -55.5617831 | 3562.6074444 |
| H | -37.5047745 | -54.0502581 | 3561.8523977 |
| H | -36.3989686 | -55.1146716 | 3560.9413720 |
| C | -39.6106163 | -55.9695386 | 3562.0855639 |
| H | -38.0872145 | -56.9418690 | 3560.9300774 |
| H | -39.2789282 | -56.4182380 | 3563.0441413 |
| H | -40.4494398 | -56.5802252 | 3561.6930907 |
| H | -40.0103008 | -54.9589209 | 3562.3112683 |
| H | -28.3519895 | -53.4417589 | 3557.4905007 |
| H | -30.2200360 | -57.0297893 | 3561.7870320 |
| H | -30.7783587 | -57.6527494 | 3553.6076758 |
| C | -28.5567022 | -53.8873544 | 3558.4901332 |
| H | -33.3275857 | -56.3874422 | 3562.1480248 |
| H | -28.0518469 | -52.0152210 | 3559.5079471 |
| H | -32.3510898 | -55.5883172 | 3553.6138520 |
| C | -29.7022143 | -54.8763152 | 3558.3052070 |

## 15n-ma

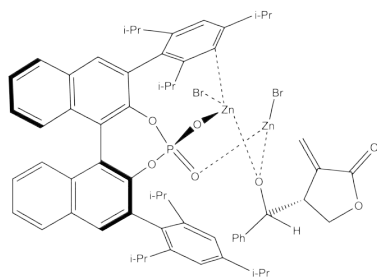

Energy (Hartree) = -11970.04648059

|   |             |             |              |
|---|-------------|-------------|--------------|
| C | -37.0867660 | -57.7823917 | 3558.0501108 |
| C | -36.3218191 | -58.8979084 | 3558.3936438 |
| C | -36.9059306 | -59.8626780 | 3559.2979517 |
| C | -36.1782593 | -60.9628949 | 3559.8425868 |
| C | -38.2840185 | -59.6948782 | 3559.7000519 |
| C | -38.8894070 | -60.6728131 | 3560.5448877 |
| C | -38.9846382 | -58.5076266 | 3559.3392612 |
| H | -39.9949203 | -58.3426222 | 3559.7450943 |
| C | -38.3829146 | -57.5083225 | 3558.5848105 |

|    |             |             |              |
|----|-------------|-------------|--------------|
| C  | -30.9858203 | -57.7321262 | 3561.3967498 |
| C  | -28.8926236 | -52.7364523 | 3559.4525630 |
| H  | -29.0747575 | -53.1049700 | 3560.4832953 |
| C  | -30.3723912 | -55.4408017 | 3559.4045244 |
| C  | -30.4444549 | -57.4101085 | 3554.6375490 |
| H  | -27.0074530 | -55.4264212 | 3558.2167122 |
| C  | -30.0919118 | -55.2905699 | 3557.0210324 |
| C  | -27.2782644 | -54.6253800 | 3558.9332768 |
| H  | -26.4200617 | -53.9261695 | 3559.0130343 |
| H  | -29.5979051 | -54.8360791 | 3556.1467277 |
| C  | -32.7920794 | -55.9364784 | 3561.2870325 |
| H  | -31.4839252 | -58.2004309 | 3562.2707485 |
| H  | -30.4553462 | -58.5280891 | 3560.8358147 |
| C  | -31.3634712 | -56.4276568 | 3559.2535301 |
| C  | -31.8771023 | -55.3228291 | 3554.5802048 |
| C  | -31.0951599 | -56.2543459 | 3556.8094473 |
| H  | -30.2215339 | -58.3637834 | 3555.1563274 |
| H  | -29.4922884 | -56.8444019 | 3554.5584766 |
| C  | -32.0143637 | -57.0120439 | 3560.5058950 |
| C  | -31.7055020 | -56.8617261 | 3557.9426194 |
| C  | -31.5153142 | -56.5880217 | 3555.3773701 |
| H  | -33.5419262 | -55.4398483 | 3560.6408021 |
| H  | -32.5876080 | -54.6889224 | 3555.1424583 |
| H  | -32.1131174 | -55.1557039 | 3561.6891507 |
| H  | -29.7956992 | -52.1801773 | 3559.1306888 |
| H  | -30.9840294 | -54.7036437 | 3554.3547965 |
| H  | -27.4232772 | -55.1003268 | 3559.9262287 |
| H  | -32.7477028 | -57.7781264 | 3560.1835777 |
| H  | -32.4365645 | -57.2021291 | 3555.4374492 |
| H  | -30.0998086 | -55.1202814 | 3560.4226223 |
| Zn | -37.1014142 | -53.0679573 | 3558.1097217 |
| Br | -36.8529516 | -51.3047397 | 3559.6411088 |
| C  | -31.5932239 | -52.1761832 | 3556.5035837 |
| C  | -35.8659155 | -51.4016306 | 3556.0649071 |
| C  | -32.0902525 | -51.7755695 | 3555.2573599 |
| C  | -33.8290439 | -52.0106080 | 3557.4415838 |
| C  | -34.3510358 | -51.6070186 | 3556.1875725 |
| C  | -32.4699829 | -52.3050497 | 3557.5942343 |
| C  | -33.4593412 | -51.5029862 | 3555.0952527 |
| O  | -36.5019900 | -52.6857392 | 3556.2357343 |
| H  | -30.5252006 | -52.4049965 | 3556.6270143 |
| H  | -34.5024239 | -52.0844628 | 3558.3098198 |
| H  | -31.4148911 | -51.6853221 | 3554.3933411 |
| H  | -32.0908006 | -52.6445144 | 3558.5701013 |
| H  | -33.8205849 | -51.2073661 | 3554.1005722 |
| Br | -35.3297975 | -54.0213504 | 3552.8532498 |
| Zn | -35.4162705 | -53.9336525 | 3555.1540408 |
| H  | -35.1694502 | -48.9593796 | 3555.4882306 |
| C  | -36.2832577 | -50.7371176 | 3554.7267172 |
| C  | -35.9398892 | -49.2286218 | 3554.7385725 |
| C  | -37.7675848 | -50.6967441 | 3554.5006257 |
| C  | -38.5726034 | -51.6479319 | 3553.9935317 |
| C  | -38.2524248 | -49.3293092 | 3554.8740784 |
| O  | -37.1526981 | -48.5325094 | 3555.0828794 |
| O  | -39.3864572 | -48.9220060 | 3554.9924884 |
| H  | -35.5972345 | -48.8792833 | 3553.7409096 |
| H  | -39.3123400 | -53.4139462 | 3560.6164538 |
| H  | -36.2014013 | -50.7421537 | 3556.8997300 |
| H  | -35.7972175 | -51.2767859 | 3553.8896164 |
| H  | -39.6466485 | -51.4374078 | 3553.8664617 |
| H  | -38.1729105 | -52.6214987 | 3553.6721094 |

### 15o-ma; COSMO

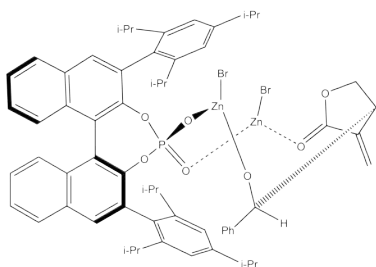

Energy (Hartree) = -11970.04237884

|    |            |            |             |    |            |           |             |
|----|------------|------------|-------------|----|------------|-----------|-------------|
| C  | 5.7471895  | 9.9604992  | 806.9144368 | H  | -2.7764936 | 7.7269837 | 808.8760369 |
| C  | 1.8379247  | 8.3186110  | 807.8799002 | C  | -5.9252052 | 6.1971489 | 808.6579816 |
| C  | 5.5896841  | 8.5852507  | 807.1499697 | H  | -4.6349832 | 6.8483038 | 810.2568605 |
| C  | 3.3772027  | 10.2935028 | 807.3631130 | H  | -6.5149872 | 7.1370269 | 808.6393306 |
| C  | 3.2112936  | 8.9123260  | 807.5914339 | H  | -6.4803540 | 5.4537393 | 809.2651343 |
| C  | 4.6359543  | 10.8160407 | 807.0273897 | H  | -5.8782968 | 5.8131436 | 807.6172008 |
| C  | 4.3301140  | 8.0635332  | 807.4895576 | C  | -2.0173141 | 3.1325078 | 812.1382424 |
| O  | 1.9223754  | 7.0059379  | 808.3146826 | C  | -1.1154603 | 4.2182909 | 812.7512152 |
| H  | 6.7349957  | 10.3693189 | 806.6508170 | H  | -0.7278254 | 3.8839753 | 813.7360351 |
| H  | 2.5111912  | 10.9705438 | 807.4536833 | H  | -1.6579165 | 5.1728479 | 812.9085916 |
| H  | 6.4568556  | 7.9107273  | 807.0706702 | H  | -0.2537873 | 4.4320002 | 812.0902135 |
| H  | 4.7535756  | 11.8978951 | 806.8579400 | C  | -3.1896187 | 2.7778967 | 813.0715597 |
| H  | 4.1841834  | 6.9923104  | 807.6953085 | H  | -1.3938431 | 2.2221963 | 812.0335379 |
| Br | 1.7206376  | 1.3691447  | 804.7813116 | H  | -2.8165820 | 2.4527458 | 814.0649145 |
| C  | -0.1590552 | 1.3756503  | 809.2119625 | H  | -3.8106382 | 1.9592095 | 812.6533085 |
| C  | 0.6817391  | 0.2680806  | 809.3540715 | H  | -3.8546659 | 3.6522431 | 813.2318789 |
| C  | 0.2038217  | -0.8345344 | 810.1544853 | H  | 7.7315339  | 6.5871534 | 808.6107035 |
| C  | 1.0258489  | -1.9468098 | 810.5081796 | H  | 7.2046244  | 1.9198361 | 812.1694824 |
| C  | -1.1534334 | -0.8039682 | 810.6484969 | H  | 5.7762742  | 2.4025219 | 804.3394276 |
| C  | -1.6419170 | -1.9066114 | 811.4127114 | C  | 7.5306352  | 6.0901230 | 809.5854589 |
| C  | -1.9700898 | 0.3374855  | 810.4037006 | H  | 4.1511117  | 1.9144268 | 813.1400160 |
| H  | -2.9985232 | 0.3509306  | 810.7964597 | H  | 7.3032947  | 8.0166216 | 810.6138739 |
| C  | -1.4851755 | 1.4536794  | 809.7317860 | H  | 3.9767006  | 4.2536700 | 804.6219322 |
| C  | 4.2586592  | 1.3567593  | 808.4446682 | C  | 6.7130410  | 4.8411231 | 809.2828722 |
| C  | 4.6874175  | 0.2686309  | 807.6934629 | C  | 6.4788947  | 1.1865017 | 811.7595422 |
| H  | 5.7240902  | 0.2444025  | 807.3255359 | C  | 6.7312407  | 7.0791607 | 810.4541779 |
| C  | 3.8108255  | -0.7974068 | 807.3424638 | H  | 6.5101125  | 6.6445533 | 811.4516548 |
| C  | 4.2418036  | -1.8471550 | 806.4771898 | C  | 6.3402463  | 3.9507068 | 810.3049983 |
| C  | 2.4529480  | -0.7990874 | 807.8302879 | C  | 6.1476390  | 2.6070252 | 805.3650391 |
| C  | 1.5710869  | -1.8232372 | 807.3738627 | H  | 9.4758316  | 5.0614104 | 809.5821611 |
| C  | 2.0284575  | 0.2592534  | 808.7145440 | C  | 6.2793264  | 4.5562305 | 807.9781760 |
| C  | 2.9185644  | 1.3140490  | 808.9370881 | C  | 8.8906717  | 5.7532472 | 810.2212861 |
| O  | 0.2717029  | 2.4678513  | 808.4647365 | H  | 9.4916889  | 6.6732103 | 810.3752216 |
| O  | 2.4971130  | 2.4026550  | 809.7129523 | H  | 6.5604234  | 5.2478666 | 807.1676713 |
| P  | 1.4928466  | 3.4494203  | 808.9643515 | C  | 4.4584583  | 2.6249342 | 812.3450723 |
| O  | 1.0783716  | 4.4672396  | 810.0273801 | H  | 6.2211251  | 0.4772935 | 812.5733542 |
| O  | 2.0469477  | 3.9921143  | 807.6338840 | H  | 6.9925923  | 0.6182160 | 810.9575697 |
| C  | -0.8241793 | -2.9855487 | 811.7130334 | C  | 5.5548207  | 2.8116899 | 810.0583166 |
| C  | 0.5250472  | -2.9949582 | 811.2683883 | C  | 4.4825356  | 4.4966996 | 805.5812143 |
| H  | -2.6819884 | -1.8747703 | 811.7735635 | C  | 5.4861965  | 3.4328251 | 807.6747510 |
| H  | -1.2122650 | -3.8261408 | 812.3081963 | H  | 6.5266678  | 1.6550779 | 805.7860059 |
| H  | 2.0738918  | -1.9645366 | 810.1788576 | H  | 7.0084342  | 3.3040601 | 805.2867015 |
| H  | 1.1819961  | -3.8376114 | 811.5327546 | C  | 5.2152178  | 1.8869717 | 811.2259734 |
| C  | 2.0153165  | -2.8181295 | 806.5140720 | C  | 5.1246257  | 2.5452832 | 808.7276941 |
| C  | 3.3651175  | -2.8421613 | 806.0722346 | C  | 5.0310732  | 3.2142606 | 806.2336698 |
| H  | 0.5207970  | -1.8089094 | 807.6959510 | H  | 3.5476474  | 3.1149185 | 811.9490367 |
| H  | 1.3124647  | -3.5903266 | 806.1658665 | H  | 3.7673540  | 5.0184283 | 806.2468237 |
| H  | 3.7071016  | -3.6400916 | 805.3956076 | H  | 5.0908777  | 3.4024464 | 812.8224634 |
| H  | 5.2834010  | -1.8385798 | 806.1195785 | H  | 5.7666833  | 7.3444520 | 809.9770002 |
| C  | -2.5172290 | 3.5172167  | 810.7455153 | H  | 5.2869933  | 5.2212076 | 805.3368182 |
| C  | -2.2642192 | 2.7228788  | 809.5921202 | H  | 8.7643008  | 5.2699920 | 811.2127119 |
| C  | -3.2444634 | 4.7137754  | 810.5934916 | H  | 4.5443290  | 1.0899791 | 810.8462222 |
| C  | -2.7116141 | 3.1608494  | 808.3135725 | H  | 4.2012136  | 2.4770161 | 806.2595736 |
| C  | -3.4332942 | 4.3630399  | 808.2205648 | Zn | 0.8874215  | 6.4038394 | 809.7495237 |
| C  | -3.7208501 | 5.1531206  | 809.3489119 | Br | -0.6098960 | 7.7107921 | 810.9505624 |
| H  | -3.4365612 | 5.3392373  | 811.4798629 | H  | 6.6687893  | 4.1519042 | 811.3372927 |
| C  | -2.4435557 | 2.3600309  | 807.0398933 | H  | -0.6904590 | 7.6206463 | 807.8702568 |
| H  | -3.7868752 | 4.6925238  | 807.2301470 | Zn | 1.5490373  | 3.3659101 | 805.8722112 |
| C  | -1.6770053 | 3.1938511  | 805.9988510 | C  | 0.9529262  | 8.3763880 | 806.5637832 |
| H  | -2.2963046 | 4.0078825  | 805.5688211 | C  | -0.3897266 | 7.6687952 | 806.8061438 |
| H  | -1.3177502 | 2.5600627  | 805.1626332 | C  | 2.6015136  | 7.7324484 | 804.6623923 |
| H  | -0.8098889 | 3.6942584  | 806.4790125 | C  | 0.8839215  | 6.2076865 | 805.5892466 |
| C  | -3.7422970 | 1.7818643  | 806.4495851 | O  | -0.1992613 | 6.2877596 | 806.3520540 |
| H  | -1.7991536 | 1.4980091  | 807.3045667 | O  | 1.2161305  | 5.1371603 | 805.0378623 |
| H  | -4.4457316 | 2.5882778  | 806.1543281 | H  | -1.2243351 | 8.0904353 | 806.2115140 |
| H  | -4.2612931 | 1.1358922  | 807.1863223 | H  | 1.3128027  | 8.9940940 | 808.6077329 |
| H  | -3.5282661 | 1.1725266  | 805.5471872 | C  | 1.5633657  | 7.5092718 | 805.4961241 |
| C  | -4.5170096 | 6.4464486  | 809.2268451 | H  | 0.8141785  | 9.4270465 | 806.2441044 |
| C  | -3.7561230 | 7.5038754  | 808.4079079 | H  | 3.1108316  | 8.7066397 | 804.6288063 |
| H  | -4.3342457 | 8.4494192  | 808.3476388 | H  | 2.9512353  | 6.9307399 | 803.9931805 |
| H  | -3.5759734 | 7.1531948  | 807.3694447 |    |            |           |             |

15o-ma

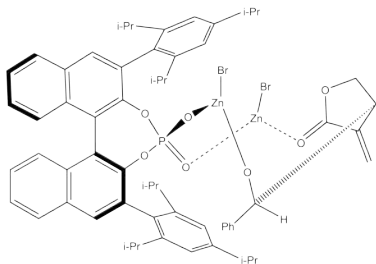

Energy (Hartree) = -11970.03041622

|    |            |            |             |
|----|------------|------------|-------------|
| C  | 5.7260401  | 9.9296077  | 806.9671811 |
| C  | 1.7987146  | 8.3133971  | 807.8945514 |
| C  | 5.5570916  | 8.5554018  | 807.1983965 |
| C  | 3.3569754  | 10.2786478 | 807.4019956 |
| C  | 3.1789517  | 8.8984208  | 807.6242224 |
| C  | 4.6211672  | 10.7929110 | 807.0760294 |
| C  | 4.2920930  | 8.0416539  | 807.5286674 |
| O  | 1.8660317  | 6.9978284  | 808.3188397 |
| H  | 6.7183881  | 10.3318866 | 806.7112360 |
| H  | 2.4957969  | 10.9620387 | 807.4916116 |
| H  | 6.4192926  | 7.8742841  | 807.1241640 |
| H  | 4.7482383  | 11.8744097 | 806.9120917 |
| H  | 4.1373891  | 6.9712510  | 807.7321705 |
| Br | 1.7329582  | 1.3769907  | 804.7744124 |
| C  | -0.1561858 | 1.3836871  | 809.2098379 |
| C  | 0.6846824  | 0.2766752  | 809.3544028 |
| C  | 0.2073188  | -0.8244951 | 810.1567349 |
| C  | 1.0287289  | -1.9370344 | 810.5099077 |
| C  | -1.1490007 | -0.7923697 | 810.6526192 |
| C  | -1.6361966 | -1.8935379 | 811.4188795 |
| C  | -1.9649657 | 0.3488871  | 810.4064900 |
| H  | -2.9927424 | 0.3651234  | 810.8008010 |
| C  | -1.4815236 | 1.4634351  | 809.7311146 |
| C  | 4.2606505  | 1.3663349  | 808.4437973 |
| C  | 4.6886552  | 0.2775562  | 807.6932834 |
| H  | 5.7253091  | 0.2551193  | 807.3252486 |
| C  | 3.8131540  | -0.7889729 | 807.3428408 |
| C  | 4.2431721  | -1.8387823 | 806.4778890 |
| C  | 2.4558201  | -0.7907486 | 807.8315589 |
| C  | 1.5742047  | -1.8155677 | 807.3766965 |
| C  | 2.0313709  | 0.2681150  | 808.7150263 |
| C  | 2.9207289  | 1.3239552  | 808.9366421 |
| O  | 0.2751162  | 2.4735143  | 808.4594773 |
| O  | 2.4991098  | 2.4130539  | 809.7115811 |
| P  | 1.4929672  | 3.4579156  | 808.9634695 |
| O  | 1.0712582  | 4.4712557  | 810.0280747 |
| O  | 2.0470046  | 4.0041587  | 807.6342375 |
| C  | -0.8194012 | -2.9726238 | 811.7187001 |
| C  | 0.5283070  | -2.9838370 | 811.2713783 |
| H  | -2.6754578 | -1.8600535 | 811.7818471 |
| H  | -1.2072501 | -3.8120362 | 812.3155800 |
| H  | 2.0757113  | -1.9552863 | 810.1775854 |
| H  | 1.1848718  | -3.8270218 | 811.5347586 |
| C  | 2.0182820  | -2.8105852 | 806.5176808 |
| C  | 3.3670592  | -2.8341489 | 806.0745042 |
| H  | 0.5244567  | -1.8005832 | 807.7000747 |
| H  | 1.3152780  | -3.5828874 | 806.1703196 |
| H  | 3.7086795  | -3.6316363 | 805.3973201 |
| H  | 5.2840214  | -1.8290646 | 806.1183198 |
| C  | -2.5151080 | 3.5295455  | 810.7384741 |
| C  | -2.2617295 | 2.7313257  | 809.5880140 |
| C  | -3.2440498 | 4.7241845  | 810.5818523 |
| C  | -2.7109501 | 3.1629029  | 808.3081913 |
| C  | -3.4351921 | 4.3629043  | 808.2112761 |
| C  | -3.7233510 | 5.1568600  | 809.3363871 |
| H  | -3.4352773 | 5.3535055  | 811.4654579 |
| C  | -2.4437751 | 2.3561393  | 807.0381481 |

|    |            |           |             |
|----|------------|-----------|-------------|
| H  | -3.7921806 | 4.6864523 | 807.2200778 |
| C  | -1.6826118 | 3.1857422 | 805.9900457 |
| H  | -2.3064879 | 3.9931806 | 805.5540234 |
| H  | -1.3192434 | 2.5478162 | 805.1587942 |
| H  | -0.8176257 | 3.6941502 | 806.4650712 |
| C  | -3.7421054 | 1.7694683 | 806.4558388 |
| H  | -1.7953221 | 1.4980736 | 807.3056293 |
| H  | -4.4507299 | 2.5709054 | 806.1597128 |
| H  | -4.2559163 | 1.1259151 | 807.1980193 |
| H  | -3.5297785 | 1.1562427 | 805.5557353 |
| C  | -4.5292376 | 6.4438296 | 809.2107151 |
| C  | -3.7893130 | 7.4990290 | 808.3703787 |
| H  | -4.3794166 | 8.4365800 | 808.3028179 |
| H  | -3.6148470 | 7.1369289 | 807.3347357 |
| H  | -2.8093756 | 7.7408831 | 808.8281344 |
| C  | -5.9433346 | 6.1760447 | 808.6654948 |
| H  | -4.6351868 | 6.8566762 | 810.2376288 |
| H  | -6.5425204 | 7.1098631 | 808.6442309 |
| H  | -6.4823739 | 5.4342277 | 809.2884733 |
| H  | -5.9084002 | 5.7796350 | 807.6289807 |
| C  | -2.0168803 | 3.1493362 | 812.1330641 |
| C  | -1.1198337 | 4.2378367 | 812.7478923 |
| H  | -0.7377000 | 3.9073335 | 813.7359471 |
| H  | -1.6617664 | 5.1934870 | 812.8990310 |
| H  | -0.2530940 | 4.4493704 | 812.0932223 |
| C  | -3.1915011 | 2.7935379 | 813.0629901 |
| H  | -1.3910984 | 2.2401669 | 812.0317646 |
| H  | -2.8215733 | 2.4699259 | 814.0578954 |
| H  | -3.8109526 | 1.9742504 | 812.6437958 |
| H  | -3.8587286 | 3.6665227 | 813.2205081 |
| H  | 7.7757582  | 6.5684845 | 808.5947695 |
| H  | 7.2058035  | 1.9208821 | 812.1665710 |
| H  | 5.7839395  | 2.4020594 | 804.3333933 |
| C  | 7.5802852  | 6.0697623 | 809.5700877 |
| H  | 4.1523167  | 1.9425466 | 813.1397218 |
| H  | 7.4025154  | 7.9934886 | 810.6134060 |
| H  | 3.9868191  | 4.2534301 | 804.6175793 |
| C  | 6.7407912  | 4.8342365 | 809.2721486 |
| C  | 6.4735272  | 1.1927160 | 811.7593468 |
| C  | 6.8114290  | 7.0677518 | 810.4554082 |
| H  | 6.5956466  | 6.6317716 | 811.4532611 |
| C  | 6.3571978  | 3.9521684 | 810.2969771 |
| C  | 6.1575633  | 2.6094346 | 805.3574557 |
| H  | 9.5073255  | 5.0078994 | 809.5312839 |
| C  | 6.3032598  | 4.5497952 | 807.9689956 |
| C  | 8.9441323  | 5.7060910 | 810.1827594 |
| H  | 9.5635217  | 6.6141543 | 810.3342356 |
| H  | 6.5923354  | 5.2349584 | 807.1557059 |
| C  | 4.4637869  | 2.6479638 | 812.3419979 |
| H  | 6.2116972  | 0.4876983 | 812.5754325 |
| H  | 6.9826343  | 0.6189069 | 810.9586255 |
| C  | 5.5614595  | 2.8199302 | 810.0544847 |
| C  | 4.4908724  | 4.4969420 | 805.5777254 |
| C  | 5.4991855  | 3.4335744 | 807.6690990 |
| H  | 6.5396231  | 1.6589344 | 805.7786825 |
| H  | 7.0177915  | 3.3067684 | 805.2765765 |
| C  | 5.2149534  | 1.9015045 | 811.2250144 |
| C  | 5.1298781  | 2.5526898 | 808.7246654 |
| C  | 5.0422661  | 3.2148636 | 806.2285367 |
| H  | 3.5558075  | 3.1429052 | 811.9462082 |
| H  | 3.7728837  | 5.0147191 | 806.2433923 |
| H  | 5.1008457  | 3.4231510 | 812.8168555 |
| H  | 5.8451567  | 7.3543699 | 809.9948516 |
| H  | 5.2931724  | 5.2251443 | 805.3367290 |
| H  | 8.8244347  | 5.2179832 | 811.1725121 |
| H  | 4.5379848  | 1.1085386 | 810.8477066 |
| H  | 4.2128609  | 2.4772116 | 806.2536369 |
| Zn | 0.8039585  | 6.3953014 | 809.7355995 |
| Br | -0.6782787 | 7.7135499 | 810.9223630 |
| H  | 6.6873980  | 4.1535828 | 811.3286268 |
| H  | -0.7328773 | 7.6329569 | 807.8475342 |

|    |            |           |             |
|----|------------|-----------|-------------|
| Zn | 1.5577021  | 3.3612757 | 805.8753134 |
| C  | 0.9319213  | 8.3821967 | 806.5649361 |
| C  | -0.4174465 | 7.6795471 | 806.7872818 |
| C  | 2.6096719  | 7.7309879 | 804.6931133 |
| C  | 0.8709489  | 6.2124904 | 805.5913197 |
| O  | -0.2282298 | 6.3000684 | 806.3336476 |
| O  | 1.2099385  | 5.1414093 | 805.0501735 |
| H  | -1.2436617 | 8.1067527 | 806.1837238 |
| H  | 1.2681904  | 8.9873298 | 808.6201982 |
| C  | 1.5548778  | 7.5133957 | 805.5068521 |
| H  | 0.8053899  | 9.4348594 | 806.2458201 |
| H  | 3.1262043  | 8.7016089 | 804.6699298 |
| H  | 2.9682616  | 6.9246963 | 804.0343326 |

## 15o-mi; COSMO

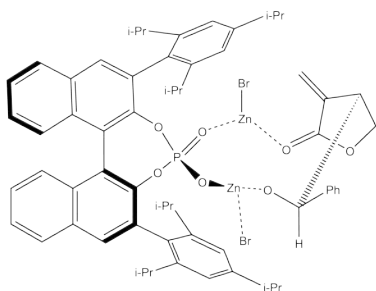

Energy (Hartree) = -11970.02120317

|    |             |            |              |
|----|-------------|------------|--------------|
| C  | -4.0025587  | -7.8781660 | 1409.3913557 |
| C  | -2.3445589  | -4.2598836 | 1407.6427139 |
| C  | -4.4898256  | -7.3967903 | 1408.1666059 |
| C  | -2.3360533  | -6.1047440 | 1409.4055741 |
| C  | -2.8465594  | -5.5925748 | 1408.1940852 |
| C  | -2.9091467  | -7.2377527 | 1410.0035031 |
| C  | -3.9081993  | -6.2683230 | 1407.5684018 |
| O  | -2.6616473  | -4.0105766 | 1406.3275178 |
| H  | -4.4651992  | -8.7598915 | 1409.8609105 |
| H  | -1.4873723  | -5.6001558 | 1409.8974471 |
| H  | -5.3346339  | -7.8928240 | 1407.6726523 |
| H  | -2.5041359  | -7.6211300 | 1410.9532110 |
| H  | -4.3063628  | -5.8943328 | 1406.6157170 |
| C  | -4.3193211  | -3.0185716 | 1408.8345610 |
| C  | -4.7278891  | -1.6428904 | 1408.4864118 |
| O  | -3.6810643  | -0.9056873 | 1408.1534506 |
| C  | -2.4625727  | -1.7149298 | 1408.1042693 |
| O  | -5.8648992  | -1.1294460 | 1408.5216670 |
| C  | -5.2071011  | -3.9089655 | 1409.3328993 |
| Zn | -7.6086294  | -1.7439172 | 1407.7609679 |
| Br | -9.7187320  | -1.4782833 | 1408.6068090 |
| C  | -9.2699830  | -3.3230541 | 1404.6198345 |
| C  | -10.2023513 | -4.2203936 | 1405.1480366 |
| C  | -11.4384594 | -3.6873164 | 1405.6563539 |
| C  | -12.3569076 | -4.4720741 | 1406.4134482 |
| C  | -11.7547242 | -2.3042022 | 1405.4000190 |
| C  | -12.9831603 | -1.7707335 | 1405.8926976 |
| C  | -10.8462598 | -1.5106061 | 1404.6461839 |
| H  | -11.1424851 | -0.4879194 | 1404.3659734 |
| C  | -9.5839193  | -1.9730052 | 1404.2745399 |
| C  | -8.5659154  | -7.7108741 | 1405.3044797 |
| C  | -9.5410560  | -8.4596817 | 1404.6509277 |
| H  | -9.3796249  | -9.5426439 | 1404.5334415 |
| C  | -10.7086411 | -7.8774773 | 1404.0924423 |
| C  | -11.6471603 | -8.6655933 | 1403.3599059 |
| C  | -10.9156844 | -6.4581082 | 1404.2273798 |
| C  | -12.0305505 | -5.8817833 | 1403.5427288 |
| C  | -9.9692886  | -5.6837155 | 1405.0017476 |
| C  | -8.8103282  | -6.3135069 | 1405.4738725 |

|   |             |             |              |
|---|-------------|-------------|--------------|
| O | -7.9864517  | -3.7940510  | 1404.3245909 |
| O | -7.8707262  | -5.5769018  | 1406.2016017 |
| P | -7.0654503  | -4.2840257  | 1405.5895899 |
| O | -6.9803350  | -3.2332882  | 1406.7080769 |
| O | -5.6996519  | -4.6936986  | 1405.0245871 |
| C | -13.8557179 | -2.5589506  | 1406.6277665 |
| C | -13.5342679 | -3.9175357  | 1406.8956442 |
| H | -13.2170908 | -0.7137657  | 1405.6908207 |
| H | -14.7944546 | -2.1327607  | 1407.0132172 |
| H | -12.1107913 | -5.5225996  | 1406.6268746 |
| H | -14.2224554 | -4.5330231  | 1407.4949495 |
| C | -12.9154795 | -6.6699421  | 1402.8198872 |
| C | -12.7382186 | -8.0771798  | 1402.7404549 |
| H | -12.1849191 | -4.7956720  | 1403.5756272 |
| H | -13.7599505 | -6.1952268  | 1402.2973086 |
| H | -13.4535336 | -8.6911955  | 1402.1723947 |
| H | -11.4742127 | -9.7505430  | 1403.2834733 |
| C | -8.2143963  | 0.1384961   | 1404.0385145 |
| C | -8.6313836  | -1.1146311  | 1403.5071976 |
| C | -7.3448333  | 0.9481262   | 1403.2851712 |
| C | -8.1667826  | -1.5220862  | 1402.2207881 |
| C | -7.2967831  | -0.6743351  | 1401.5150695 |
| C | -6.8664514  | 0.5629060   | 1402.0243142 |
| H | -7.0039396  | 1.9078125   | 1403.7071690 |
| C | -8.6064831  | -2.8213274  | 1401.5450568 |
| H | -6.9398376  | -0.9961243  | 1400.5236765 |
| C | -7.4078849  | -3.7339431  | 1401.2222567 |
| H | -6.7594691  | -3.2901734  | 1400.4379367 |
| H | -7.7586400  | -4.7176926  | 1400.8462751 |
| H | -6.7880102  | -3.9087501  | 1402.1226906 |
| C | -9.4550407  | -2.5353607  | 1400.2914904 |
| H | -9.2628479  | -3.3746459  | 1402.2449929 |
| H | -8.8696406  | -1.9949854  | 1399.5184275 |
| H | -10.3400445 | -1.9140249  | 1400.5379475 |
| H | -9.8149967  | -3.4828526  | 1399.8393111 |
| C | -5.8992456  | 1.4446633   | 1401.2462403 |
| C | -4.5468355  | 0.7411636   | 1401.0303711 |
| H | -3.8247229  | 1.4202732   | 1400.5313487 |
| H | -4.6611009  | -0.1567391  | 1400.3874293 |
| H | -4.1093892  | 0.4061906   | 1401.9922600 |
| C | -6.5063074  | 1.9186093   | 1399.9133408 |
| H | -5.7134310  | 2.3462803   | 1401.8706105 |
| H | -5.8111246  | 2.6026983   | 1399.3838279 |
| H | -7.4635993  | 2.4550586   | 1400.0727708 |
| H | -6.7095979  | 1.0613513   | 1399.2375262 |
| C | -8.5829353  | 0.5891953   | 1405.4497487 |
| C | -7.3509817  | 0.4969574   | 1406.3599717 |
| H | -7.6128365  | 0.6895268   | 1407.4227129 |
| H | -6.5525901  | 1.2209295   | 1406.0946896 |
| H | -6.8330338  | -0.4848316  | 1406.2111768 |
| C | -9.2270399  | 1.9813325   | 1405.5069892 |
| H | -9.3207308  | -0.1257149  | 1405.8629474 |
| H | -9.5268968  | 2.2259991   | 1406.5467028 |
| H | -10.1327226 | 2.0278414   | 1404.8687824 |
| H | -8.5323594  | 2.7750825   | 1405.1623114 |
| H | -3.4134683  | -11.2099124 | 1405.7305421 |
| H | -8.0761595  | -10.6516264 | 1409.4117795 |
| H | -6.6807466  | -7.8151618  | 1401.4967863 |
| C | -4.1800489  | -11.3589674 | 1406.5223500 |
| H | -9.0917429  | -7.7332647  | 1409.5496399 |
| H | -2.6642268  | -11.9381874 | 1407.9949613 |
| H | -4.7499551  | -6.4197180  | 1402.4920710 |
| C | -5.2602403  | -10.3095456 | 1406.2881287 |
| C | -8.8861150  | -10.3695859 | 1408.7069309 |
| C | -3.4782678  | -11.1927657 | 1407.8808250 |
| H | -4.1863199  | -11.3439772 | 1408.7229044 |
| C | -6.3656690  | -10.1905670 | 1407.1531368 |
| C | -6.7052844  | -8.4458647  | 1402.4099115 |
| H | -5.2194116  | -12.9139869 | 1405.3617644 |
| C | -5.1915149  | -9.4437382  | 1405.1853427 |
| C | -4.7480217  | -12.7810378 | 1406.3565243 |

|    |            |             |              |
|----|------------|-------------|--------------|
| H  | -3.9472734 | -13.5419483 | 1406.4639525 |
| H  | -4.3189594 | -9.5125943  | 1404.5169925 |
| C  | -8.2365294 | -7.9230085  | 1408.8681174 |
| H  | -9.7993104 | -10.2074877 | 1409.3146436 |
| H  | -9.0685789 | -11.2338897 | 1408.0364841 |
| C  | -7.4029557 | -9.2708330  | 1406.9153222 |
| C  | -4.7145050 | -7.1648975  | 1403.3124383 |
| C  | -6.2123823 | -8.5183320  | 1404.8884022 |
| H  | -7.7559242 | -8.7531049  | 1402.5825432 |
| H  | -6.1111531 | -9.3622928  | 1402.2101599 |
| C  | -8.5443201 | -9.0992445  | 1407.9167444 |
| C  | -7.3403251 | -8.4544344  | 1405.7486500 |
| C  | -6.1318899 | -7.6757201  | 1403.6157971 |
| H  | -8.0245546 | -6.9905181  | 1408.3085789 |
| H  | -4.2634002 | -6.6725341  | 1404.1951236 |
| H  | -7.3451953 | -8.1477686  | 1409.4911430 |
| H  | -3.0410029 | -10.1806922 | 1407.9890223 |
| H  | -4.0399836 | -7.9832491  | 1402.9849745 |
| H  | -5.5198790 | -12.9951485 | 1407.1255653 |
| H  | -9.4492919 | -8.8198249  | 1407.3367342 |
| H  | -6.7696967 | -6.7815317  | 1403.7674880 |
| Zn | -4.2029438 | -3.4305798  | 1405.4694527 |
| Br | -4.5768615 | -1.3204457  | 1404.5575441 |
| H  | -6.4197799 | -10.8367215 | 1408.0420967 |
| C  | -2.8236215 | -3.1170647  | 1408.6347466 |
| H  | -1.6995153 | -1.1821686  | 1408.7008000 |
| H  | -2.1642975 | -1.7536346  | 1407.0368798 |
| H  | -2.3361979 | -3.2999138  | 1409.6139526 |
| H  | -6.2705357 | -3.6355196  | 1409.4219957 |
| H  | -4.9112628 | -4.9092243  | 1409.6769030 |
| H  | -1.2275984 | -4.2601563  | 1407.7441194 |

|    |             |            |              |
|----|-------------|------------|--------------|
| H  | -2.2035609  | -1.7702333 | 1406.9955127 |
| Zn | -7.6215595  | -1.7731264 | 1407.7509173 |
| H  | -6.2475347  | -3.6552933 | 1409.4631337 |
| Br | -9.7174860  | -1.4773678 | 1408.6028799 |
| C  | -9.2652861  | -3.3236471 | 1404.6207039 |
| C  | -10.1976884 | -4.2229032 | 1405.1454997 |
| C  | -11.4328542 | -3.6914747 | 1405.6575035 |
| C  | -12.3518901 | -4.4796005 | 1406.4098591 |
| C  | -11.7473350 | -2.3064111 | 1405.4101288 |
| C  | -12.9741545 | -1.7750254 | 1405.9079087 |
| C  | -10.8388450 | -1.5099864 | 1404.6596596 |
| H  | -11.1328359 | -0.4850045 | 1404.3856878 |
| C  | -9.5781406  | -1.9714900 | 1404.2821641 |
| C  | -8.5621457  | -7.7143025 | 1405.2924000 |
| C  | -9.5362690  | -8.4604251 | 1404.6346074 |
| H  | -9.3734772  | -9.5430440 | 1404.5153857 |
| C  | -10.7027840 | -7.8766181 | 1404.0760270 |
| C  | -11.6404527 | -8.6611927 | 1403.3395811 |
| C  | -10.9106150 | -6.4579786 | 1404.2165403 |
| C  | -12.0259201 | -5.8796033 | 1403.5349068 |
| C  | -9.9646495  | -5.6857357 | 1404.9934042 |
| C  | -8.8057810  | -6.3170087 | 1405.4638257 |
| O  | -7.9833897  | -3.7944158 | 1404.3199442 |
| O  | -7.8655135  | -5.5822261 | 1406.1919221 |
| P  | -7.0566130  | -4.2927030 | 1405.5768213 |
| O  | -6.9559108  | -3.2465868 | 1406.7001117 |
| O  | -5.6960965  | -4.7043356 | 1405.0023324 |
| C  | -13.8472118 | -2.5664450 | 1406.6379293 |
| C  | -13.5279288 | -3.9268305 | 1406.8959472 |
| H  | -13.2056284 | -0.7159795 | 1405.7147195 |
| H  | -14.7843860 | -2.1409441 | 1407.0276508 |
| H  | -12.1057610 | -5.5314599 | 1406.6157448 |
| H  | -14.2163880 | -4.5452761 | 1407.4917073 |
| C  | -12.9098892 | -6.6650985 | 1402.8088394 |
| C  | -12.7313228 | -8.0711584 | 1402.7225850 |
| H  | -12.1806540 | -4.7938130 | 1403.5742060 |
| H  | -13.7549352 | -6.1886234 | 1402.2889422 |
| H  | -13.4456585 | -8.6832844 | 1402.1513801 |
| H  | -11.4666836 | -9.7456436 | 1403.2582196 |
| C  | -8.2058767  | 0.1385144  | 1404.0469731 |
| C  | -8.6277027  | -1.1118794 | 1403.5137827 |
| C  | -7.3399033  | 0.9490200  | 1403.2911589 |
| C  | -8.1708656  | -1.5157792 | 1402.2236884 |
| C  | -7.3036801  | -0.6670568 | 1401.5165636 |
| C  | -6.8688261  | 0.5676599  | 1402.0269016 |
| H  | -6.9947321  | 1.9065731  | 1403.7144561 |
| C  | -8.6152778  | -2.8123143 | 1401.5460010 |
| H  | -6.9511508  | -0.9869913 | 1400.5231345 |
| C  | -7.4194236  | -3.7248571 | 1401.2134400 |
| H  | -6.7749384  | -3.2799931 | 1400.4266676 |
| H  | -7.7727479  | -4.7074645 | 1400.8370149 |
| H  | -6.7928188  | -3.9013771 | 1402.1086931 |
| C  | -9.4711821  | -2.5212368 | 1400.2988109 |
| H  | -9.2682460  | -3.3677543 | 1402.2474783 |
| H  | -8.8907744  | -1.9781004 | 1399.5240644 |
| H  | -10.3536516 | -1.8995230 | 1400.5525520 |
| H  | -9.8348134  | -3.4664419 | 1399.8449237 |
| C  | -5.9039975  | 1.4498385  | 1401.2466535 |
| C  | -4.5555957  | 0.7433129  | 1401.0171392 |
| H  | -3.8345231  | 1.4227780  | 1400.5171690 |
| H  | -4.6768448  | -0.1502114 | 1400.3696594 |
| H  | -4.1125883  | 0.3993382  | 1401.9730032 |
| C  | -6.5201546  | 1.9342132  | 1399.9218327 |
| H  | -5.7104253  | 2.3473485  | 1401.8748928 |
| H  | -5.8273673  | 2.6188061  | 1399.3899184 |
| H  | -7.4746040  | 2.4721165  | 1400.0917940 |
| H  | -6.7324158  | 1.0819985  | 1399.2425783 |
| C  | -8.5649793  | 0.5849548  | 1405.4617926 |
| C  | -7.3269929  | 0.4943351  | 1406.3641387 |
| H  | -7.5807886  | 0.6881415  | 1407.4282868 |
| H  | -6.5289412  | 1.2150674  | 1406.0891934 |

### 15o-mi

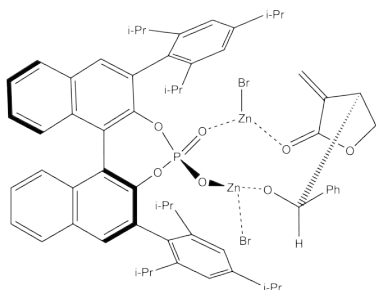

Energy (Hartree) = -11970.00822069

|   |            |            |              |
|---|------------|------------|--------------|
| C | -4.0266037 | -7.8616927 | 1409.3984044 |
| C | -2.3515797 | -4.2692516 | 1407.6180694 |
| C | -4.5176866 | -7.3831775 | 1408.1742225 |
| C | -2.3390928 | -6.1093495 | 1409.3868650 |
| C | -2.8550420 | -5.5975205 | 1408.1781323 |
| C | -2.9201762 | -7.2314117 | 1409.9968408 |
| C | -3.9284722 | -6.2650700 | 1407.5646418 |
| O | -2.6824140 | -4.0164732 | 1406.3116230 |
| H | -4.4959704 | -8.7349262 | 1409.8769395 |
| H | -1.4788959 | -5.6129499 | 1409.8672432 |
| H | -5.3710545 | -7.8735224 | 1407.6893898 |
| H | -2.5109552 | -7.6146268 | 1410.9447262 |
| H | -4.3269784 | -5.8919006 | 1406.6119471 |
| C | -2.8185258 | -3.1225116 | 1408.6178642 |
| C | -4.3103539 | -3.0332881 | 1408.8460776 |
| C | -4.7385407 | -1.6649419 | 1408.4899775 |
| O | -3.7024520 | -0.9208103 | 1408.1345628 |
| C | -2.4810929 | -1.7209848 | 1408.0685886 |
| O | -5.8800171 | -1.1667654 | 1408.5382593 |
| C | -5.1840124 | -3.9259206 | 1409.3646753 |
| H | -4.8777934 | -4.9218798 | 1409.7121145 |
| H | -2.3094611 | -3.2983825 | 1409.5877063 |
| H | -1.7092047 | -1.1762928 | 1408.6437744 |

|    |             |             |              |
|----|-------------|-------------|--------------|
| H  | -6.8109396  | -0.4885303  | 1406.2183719 |
| C  | -9.2129636  | 1.9748997   | 1405.5263717 |
| H  | -9.2986258  | -0.1319630  | 1405.8792761 |
| H  | -9.5107136  | 2.2149490   | 1406.5677134 |
| H  | -10.1204176 | 2.0219857   | 1404.8908543 |
| H  | -8.5228124  | 2.7725215   | 1405.1814481 |
| H  | -3.4091452  | -11.2064544 | 1405.7569979 |
| H  | -8.0975975  | -10.6467840 | 1409.4090062 |
| H  | -6.6549164  | -7.8282760  | 1401.4956931 |
| C  | -4.1752529  | -11.3491019 | 1406.5505731 |
| H  | -9.1300363  | -7.7353368  | 1409.5257103 |
| H  | -2.6571555  | -11.9034159 | 1408.0313251 |
| H  | -4.7285861  | -6.4289734  | 1402.5001059 |
| C  | -5.2587408  | -10.3060992 | 1406.3034893 |
| C  | -8.9016957  | -10.3733498 | 1408.6941491 |
| C  | -3.4732714  | -11.1620826 | 1407.9061355 |
| H  | -4.1807902  | -11.3041772 | 1408.7502788 |
| C  | -6.3716428  | -10.1893604 | 1407.1586525 |
| C  | -6.6881787  | -8.4552263  | 1402.4109726 |
| H  | -5.2093358  | -12.9218115 | 1405.4099335 |
| C  | -5.1844989  | -9.4432563  | 1405.1993723 |
| C  | -4.7368053  | -12.7753018 | 1406.4020102 |
| H  | -3.9332325  | -13.5319431 | 1406.5175075 |
| H  | -4.3059820  | -9.5095655  | 1404.5389194 |
| C  | -8.2681890  | -7.9227788  | 1408.8520345 |
| H  | -9.8219330  | -10.2158672 | 1409.2922523 |
| H  | -9.0708658  | -11.2420846 | 1408.0261671 |
| C  | -7.4097406  | -9.2735982  | 1406.9106599 |
| C  | -4.6975720  | -7.1770658  | 1403.3177947 |
| C  | -6.2056059  | -8.5223016  | 1404.8913664 |
| H  | -7.7414593  | -8.7559732  | 1402.5779282 |
| H  | -6.0981789  | -9.3756589  | 1402.2181128 |
| C  | -8.5602170  | -9.1041075  | 1407.9022307 |
| C  | -7.3397794  | -8.4589130  | 1405.7432425 |
| C  | -6.1174189  | -7.6834384  | 1403.6169579 |
| H  | -8.0572367  | -6.9905889  | 1408.2918965 |
| H  | -4.2439762  | -6.6907944  | 1404.2024351 |
| H  | -7.3811903  | -8.1395732  | 1409.4839678 |
| H  | -3.0392378  | -10.1474158 | 1408.0005772 |
| H  | -4.0258857  | -7.9965470  | 1402.9872717 |
| H  | -5.5071384  | -12.9845473 | 1407.1737327 |
| H  | -9.4618402  | -8.8323897  | 1407.3133413 |
| H  | -6.7533123  | -6.7870884  | 1403.7636371 |
| Zn | -4.2121489  | -3.4190738  | 1405.4510321 |
| Br | -4.5699022  | -1.3250484  | 1404.5202157 |
| H  | -6.4311429  | -10.8342829 | 1408.0481603 |
| H  | -1.2327845  | -4.2742997  | 1407.7084955 |

### 15p-ma; COSMO

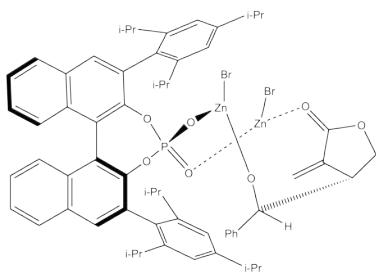

Energy (Hartree) = -11970.03566318

|   |            |            |             |
|---|------------|------------|-------------|
| C | 0.2306672  | 1.4431548  | 269.4686388 |
| C | 1.0514886  | 0.4081743  | 269.9101672 |
| C | 0.5753918  | -0.3857107 | 271.0165440 |
| C | 1.3853956  | -1.3627385 | 271.6675328 |
| C | -0.7671934 | -0.1661289 | 271.5040724 |
| C | -1.2499461 | -0.9649187 | 272.5838371 |
| C | -1.5860837 | 0.8433839  | 270.9138895 |
| H | -2.6213248 | 0.9580150  | 271.2677915 |
| C | -1.1011200 | 1.6852406  | 269.9221000 |
| C | 4.5745769  | 0.8960748  | 268.4145929 |

|   |            |            |             |
|---|------------|------------|-------------|
| C | 4.8411065  | -0.3902996 | 267.9591798 |
| H | 5.8278772  | -0.6070170 | 267.5217256 |
| C | 3.8715136  | -1.4292972 | 268.0210552 |
| C | 4.1371571  | -2.7198331 | 267.4717571 |
| C | 2.5886918  | -1.1649332 | 268.6256664 |
| C | 1.6041787  | -2.1994802 | 268.5888373 |
| C | 2.3370657  | 0.1361014  | 269.2028152 |
| C | 3.3038008  | 1.1350441  | 269.0169619 |
| O | 0.7260086  | 2.2954497  | 268.4773702 |
| O | 3.0880992  | 2.4235760  | 269.5047601 |
| P | 1.8601279  | 3.3676168  | 268.9808453 |
| O | 1.3994500  | 4.1890133  | 270.1703718 |
| O | 2.2335250  | 4.1117224  | 267.6721776 |
| C | -0.4421188 | -1.9200773 | 273.1833800 |
| C | 0.8897928  | -2.1096577 | 272.7276590 |
| H | -2.2774550 | -0.7967991 | 272.9428321 |
| H | -0.8262151 | -2.5226038 | 274.0205454 |
| H | 2.4196391  | -1.5121660 | 271.3261664 |
| H | 1.5363278  | -2.8508056 | 273.2217978 |
| C | 1.8862394  | -3.4382742 | 268.0296039 |
| C | 3.1675439  | -3.7107321 | 267.4799148 |
| H | 0.6032829  | -2.0051577 | 268.9972173 |
| H | 1.1056907  | -4.2140293 | 268.0070771 |
| H | 3.3812253  | -4.7000315 | 267.0474918 |
| H | 5.1268235  | -2.9066751 | 267.0261751 |
| C | -1.9801696 | 4.0693928  | 269.8755264 |
| C | -1.8478952 | 2.7964091  | 269.2493161 |
| C | -2.4748210 | 5.1408722  | 269.1122698 |
| C | -2.2462311 | 2.6208525  | 267.8966802 |
| C | -2.7174397 | 3.7341400  | 267.1720954 |
| C | -2.8240503 | 5.0079331  | 267.7547312 |
| H | -2.5527692 | 6.1375536  | 269.5730791 |
| C | -2.1909163 | 1.2550014  | 267.2119449 |
| H | -2.9986573 | 3.5953807  | 266.1173659 |
| C | -1.2676214 | 1.2404481  | 265.9821701 |
| H | -1.6284453 | 1.9238365  | 265.1863949 |
| H | -1.2124741 | 0.2204945  | 265.5486869 |
| H | -0.2389098 | 1.5547252  | 266.2458696 |
| C | -3.6089492 | 0.7692672  | 266.8551568 |
| H | -1.7781219 | 0.5295008  | 267.9427629 |
| H | -4.0887782 | 1.4365268  | 266.1089114 |
| H | -4.2625307 | 0.7411256  | 267.7506137 |
| H | -3.5751417 | -0.2510205 | 266.4200140 |
| C | -3.3244720 | 6.2265915  | 266.9876969 |
| C | -3.0681893 | 6.1610480  | 265.4763994 |
| H | -3.3389301 | 7.1243815  | 264.9981809 |
| H | -3.6802962 | 5.3742729  | 264.9874450 |
| H | -2.0039074 | 5.9506640  | 265.2493845 |
| C | -4.8174716 | 6.4703216  | 267.2862270 |
| H | -2.7533256 | 7.0942963  | 267.3861198 |
| H | -5.1773440 | 7.3950018  | 266.7885974 |
| H | -5.0025950 | 6.5709572  | 268.3747750 |
| H | -5.4326886 | 5.6223099  | 266.9181341 |
| C | -1.5837947 | 4.2808813  | 271.3353820 |
| C | -1.0909833 | 5.7046715  | 271.6410080 |
| H | -0.5264289 | 5.7192437  | 272.5971225 |
| H | -1.9313198 | 6.4210613  | 271.7586219 |
| H | -0.4529445 | 6.1126157  | 270.8318033 |
| C | -2.7446327 | 3.9170857  | 272.2826345 |
| H | -0.7412051 | 3.5886726  | 271.5422711 |
| H | -2.4380646 | 4.0389091  | 273.3422229 |
| H | -3.0854640 | 2.8731132  | 272.1448324 |
| H | -3.6166111 | 4.5796172  | 272.0995802 |
| H | 9.0628576  | 4.8662455  | 266.6399889 |
| H | 8.4131810  | 1.5035980  | 271.4835228 |
| H | 4.4343645  | 1.4305141  | 264.0940177 |
| C | 9.1704018  | 4.4216940  | 267.6539500 |
| H | 5.6003367  | 2.0615883  | 272.7164080 |
| H | 10.2887839 | 6.1549179  | 268.3896622 |
| H | 3.5881276  | 3.8162878  | 264.6114415 |
| C | 7.8978641  | 3.6242998  | 267.9182457 |



|    |            |            |             |
|----|------------|------------|-------------|
| C  | 7.5939266  | 0.7875737  | 271.2639608 |
| C  | 9.3748970  | 5.5795508  | 268.6442465 |
| H  | 9.4986256  | 5.2078789  | 269.6833553 |
| C  | 7.6746989  | 2.9745548  | 269.1467612 |
| C  | 5.1967861  | 1.5152527  | 264.8958758 |
| H  | 10.2693220 | 2.6781299  | 266.8808431 |
| C  | 6.9239624  | 3.4822945  | 266.9154262 |
| C  | 10.3980174 | 3.4911818  | 267.6235785 |
| H  | 11.3170774 | 4.0559868  | 267.3626706 |
| H  | 7.0687329  | 4.0179668  | 265.9638393 |
| C  | 5.8014883  | 2.5347939  | 271.7331116 |
| H  | 7.3623397  | 0.2577304  | 272.2105653 |
| H  | 7.9808784  | 0.0432666  | 270.5383882 |
| C  | 6.5593000  | 2.1420125  | 269.3601667 |
| C  | 4.4589248  | 3.9066467  | 265.2924277 |
| C  | 5.7868891  | 2.6673907  | 267.0791601 |
| H  | 5.3345165  | 0.5107116  | 265.3425806 |
| H  | 6.1578457  | 1.8116276  | 264.4253349 |
| C  | 6.3399475  | 1.4971304  | 270.7272344 |
| C  | 5.6349660  | 1.9511090  | 268.2960391 |
| C  | 4.7633876  | 2.5504953  | 265.9507008 |
| H  | 4.8589015  | 2.9977254  | 271.3814234 |
| H  | 4.2218855  | 4.6712752  | 266.0587545 |
| H  | 6.5355574  | 3.3519259  | 271.8951146 |
| H  | 8.5141271  | 6.2768846  | 268.6351917 |
| H  | 5.3125990  | 4.2773715  | 264.6879943 |
| H  | 10.5632451 | 3.0178119  | 268.6142587 |
| H  | 5.5560937  | 0.7208508  | 270.6047272 |
| H  | 3.8151732  | 2.1909985  | 266.4032301 |
| Zn | 1.9640539  | 5.7965626  | 271.2187621 |
| Br | 2.8044239  | 5.2987824  | 273.3060874 |
| H  | 8.4007492  | 3.1056210  | 269.9646800 |
| C  | 5.3306444  | 5.7482726  | 269.6982742 |
| C  | 4.1054697  | 6.3909547  | 269.4671984 |
| C  | 3.8288032  | 7.6563710  | 270.0402980 |
| C  | 4.8200673  | 8.2704675  | 270.8282853 |
| C  | 6.0448315  | 7.6257177  | 271.0671350 |
| C  | 6.2971138  | 6.3600104  | 270.5131773 |
| C  | 2.4252963  | 8.2433604  | 269.9295443 |
| H  | 4.6114959  | 9.2465064  | 271.2958026 |
| H  | 6.7972883  | 8.1039330  | 271.7132340 |
| O  | 1.4497959  | 7.2692785  | 270.1472299 |
| C  | 1.9958944  | 7.8713514  | 267.4678773 |
| C  | 0.5914166  | 7.4021846  | 267.5093873 |
| O  | -0.1836945 | 8.3150595  | 268.0723212 |
| C  | 0.6349864  | 9.4175752  | 268.5824548 |
| O  | 0.0893216  | 6.3587394  | 267.0475260 |
| C  | 2.8991295  | 7.4464756  | 266.5645323 |
| Zn | 0.9185108  | 4.6849551  | 266.3801870 |
| Br | 0.5677630  | 4.1247617  | 264.1921661 |
| H  | 3.3488773  | 5.9046980  | 268.8347212 |
| H  | 5.5245455  | 4.7616031  | 269.2518110 |
| H  | 7.2438428  | 5.8413451  | 270.7224789 |
| H  | 2.6362882  | 6.6999105  | 265.7955358 |
| H  | 3.9229627  | 7.8481357  | 266.5407250 |
| C  | 2.0957393  | 8.9117924  | 268.5521908 |
| H  | 0.2641951  | 9.6365895  | 269.6006455 |
| H  | 0.4627936  | 10.2871328 | 267.9171103 |
| H  | 2.8156325  | 9.7190955  | 268.3181971 |
| H  | 2.3636445  | 9.0784352  | 270.6795854 |

### 15p-ma

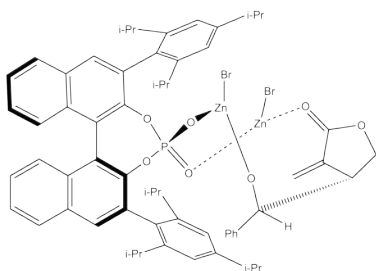

Energy (Hartree) = -11970.04385196

|   |            |            |             |    |            |            |             |
|---|------------|------------|-------------|----|------------|------------|-------------|
| C | 0.2296882  | 1.4253752  | 269.4444082 | H  | -3.1560661 | 2.8534375  | 272.1076040 |
| C | 1.0494759  | 0.4004034  | 269.9097859 | H  | -3.6671787 | 4.5647591  | 272.0685573 |
| C | 0.5656566  | -0.3773346 | 271.0241668 | H  | 9.0457678  | 4.8435318  | 266.5806784 |
| C | 1.3709086  | -1.3428799 | 271.6970610 | H  | 8.4202537  | 1.5867410  | 271.5084972 |
| C | -0.7813353 | -0.1526801 | 271.4962550 | H  | 4.4083413  | 1.3609537  | 264.1144013 |
| C | -1.2724067 | -0.9372667 | 272.5820553 | C  | 9.1660905  | 4.4040885  | 267.5955922 |
| C | -1.5940783 | 0.8507395  | 270.8881604 | H  | 5.5885964  | 2.1044964  | 272.7030273 |
| H | -2.6298937 | 0.9750430  | 271.2367262 | H  | 10.3011597 | 6.1384151  | 268.3045716 |
| C | -1.1024987 | 1.6805145  | 269.8896139 | H  | 3.5620090  | 3.7549751  | 264.5987863 |
| C | 4.5819173  | 0.8849561  | 268.4338102 | C  | 7.8946661  | 3.6124215  | 267.8815248 |
| C | 4.8605567  | -0.4080598 | 268.0059980 | C  | 7.6211231  | 0.8488904  | 271.2871050 |
| H | 5.8524930  | -0.6238779 | 267.5797550 | C  | 9.3892930  | 5.5672639  | 268.5752507 |
| C | 3.8986200  | -1.4526258 | 268.0806919 | H  | 9.5283307  | 5.2016806  | 269.6145910 |
| C | 4.1768840  | -2.7515801 | 267.5594408 | C  | 7.6823019  | 2.9766714  | 269.1189478 |
| C | 2.6093703  | -1.1846552 | 268.6691860 | C  | 5.1736021  | 1.4568045  | 264.9120905 |
| C | 1.6323800  | -2.2264585 | 268.6438084 | H  | 10.2460333 | 2.6518970  | 266.8165533 |
| C | 2.3436893  | 0.1253523  | 269.2193848 | C  | 6.9123491  | 3.4593254  | 266.8891646 |
| C | 3.3053092  | 1.1281058  | 269.0223989 | C  | 10.3892617 | 3.4684752  | 267.5523756 |
| O | 0.7311934  | 2.2596264  | 268.4422590 | H  | 11.3076824 | 4.0268683  | 267.2759626 |
| O | 3.0818966  | 2.4249031  | 269.4817328 | H  | 7.0484932  | 3.9841569  | 265.9303808 |
| P | 1.8435280  | 3.3520324  | 268.9499970 | C  | 5.7876055  | 2.5634333  | 271.7128316 |
| O | 1.3601455  | 4.1704136  | 270.1315772 | H  | 7.3924913  | 0.3256809  | 272.2379391 |
| O | 2.2154013  | 4.0967708  | 267.6407578 | H  | 8.0354113  | 0.1057001  | 270.5758009 |
| C | -0.4696408 | -1.8827824 | 273.2020530 | C  | 6.5691514  | 2.1467371  | 269.3518671 |
| C | 0.8663585  | -2.0759697 | 272.7620396 | C  | 4.4387284  | 3.8550711  | 265.2705560 |
| H | -2.3030083 | -0.7646417 | 272.9298440 | C  | 5.7778821  | 2.6451692  | 267.0709660 |
| H | -0.8609248 | -2.4739745 | 274.0438782 | H  | 5.3093046  | 0.4595134  | 265.3750598 |
| H | 2.4084168  | -1.4941098 | 271.3670757 | H  | 6.1340356  | 1.7417234  | 264.4334982 |
| H | 1.5095837  | -2.8086583 | 273.2726988 | C  | 6.3562984  | 1.5208943  | 270.7287295 |
| C | 1.9274261  | -3.4737995 | 268.1120746 | C  | 5.6369982  | 1.9430171  | 268.2971411 |
| C | 3.2145357  | -3.7485590 | 267.5789189 | C  | 4.7473165  | 2.5109221  | 265.9509103 |
| H | 0.6272164  | -2.0302584 | 269.0402686 | H  | 4.8373884  | 2.9998019  | 271.3488288 |
| H | 1.1520933  | -4.2549074 | 268.0985379 | H  | 4.2092287  | 4.6340715  | 266.0246573 |
| H | 3.4386092  | -4.7445655 | 267.1678246 | H  | 6.5013814  | 3.3997635  | 271.8661973 |
| H | 5.1714188  | -2.9400411 | 267.1255302 | H  | 8.5307317  | 6.2671502  | 268.5755957 |
| C | -1.9970728 | 4.0584505  | 269.8673273 | H  | 5.2875260  | 4.2131622  | 264.6516204 |
| C | -1.8367962 | 2.8001892  | 269.2177649 | H  | 10.5658658 | 2.9985837  | 268.5425932 |
| C | -2.4922895 | 5.1389366  | 269.1175753 | H  | 5.5907613  | 0.7252677  | 270.6138385 |
| C | -2.1984190 | 2.6523960  | 267.8511866 | H  | 3.8014888  | 2.1600587  | 266.4148439 |
| C | -2.6677516 | 3.7755240  | 267.1410568 | Zn | 1.9318701  | 5.7361326  | 271.2446038 |
| C | -2.8118350 | 5.0326116  | 267.7510994 | Br | 2.7484228  | 5.2347683  | 273.3259780 |
| H | -2.5928022 | 6.1237889  | 269.5991101 | H  | 8.4157309  | 3.1162574  | 269.9287165 |
| C | -2.1199733 | 1.3021885  | 267.1385114 | C  | 5.3468238  | 5.7517664  | 269.6673880 |
| H | -2.9228597 | 3.6571412  | 266.0773894 | C  | 4.1063364  | 6.3750106  | 269.4699179 |
| C | -1.2205318 | 1.3304762  | 265.8920827 | C  | 3.8218078  | 7.6294177  | 270.0610131 |
| H | -1.6095589 | 2.0161426  | 265.1119303 | C  | 4.8185086  | 8.2525710  | 270.8340860 |
| H | -1.1480988 | 0.3196691  | 265.4404766 | C  | 6.0586709  | 7.6275555  | 271.0394358 |
| H | -0.1940765 | 1.6625247  | 266.1425194 | C  | 6.3201750  | 6.3726760  | 270.4665677 |
| C | -3.5341587 | 0.7920010  | 266.8000177 | C  | 2.4096588  | 8.1986078  | 269.9753453 |
| H | -1.6779751 | 0.5722000  | 267.8474341 | H  | 4.6020900  | 9.2187939  | 271.3182505 |
| H | -4.0437865 | 1.4659099  | 266.0801241 | H  | 6.8159296  | 8.1111857  | 271.6756339 |
| H | -4.1681507 | 0.7304975  | 267.7075783 | O  | 1.4451629  | 7.2109339  | 270.1559394 |
| H | -3.4884457 | -0.2173139 | 266.3410229 | C  | 1.9740795  | 7.8812957  | 267.5148607 |
| C | -3.3191911 | 6.2605101  | 267.0036055 | C  | 0.5737672  | 7.3975797  | 267.5575981 |
| C | -3.0665618 | 6.2212847  | 265.4911159 | O  | -0.2075436 | 8.3014711  | 268.1333749 |
| H | -3.3440127 | 7.1904822  | 265.0290570 | C  | 0.6035935  | 9.3927249  | 268.6675711 |
| H | -3.6766531 | 5.4402211  | 264.9906871 | O  | 0.0779291  | 6.3596093  | 267.0835815 |
| H | -2.0025952 | 6.0202370  | 265.2548146 | C  | 2.8807929  | 7.4719708  | 266.6081215 |
| C | -4.8127681 | 6.4914503  | 267.3091768 | Zn | 0.8941671  | 4.6915840  | 266.3652049 |
| H | -2.7516888 | 7.1247142  | 267.4150208 | Br | 0.5754653  | 4.2707261  | 264.1455497 |
| H | -5.1788620 | 7.4224753  | 266.8283400 | H  | 3.3414512  | 5.8808039  | 268.8539003 |
| H | -4.9972270 | 6.5715772  | 268.3993594 | H  | 5.5471354  | 4.7721203  | 269.2088372 |
| H | -5.4244337 | 5.6468247  | 266.9281830 | H  | 7.2790824  | 5.8672561  | 270.6505880 |
| C | -1.6248365 | 4.2516908  | 271.3362467 | H  | 2.6262193  | 6.7259830  | 265.8359644 |
| C | -1.1246280 | 5.6686055  | 271.6642702 | H  | 3.9019615  | 7.8805128  | 266.5926249 |
| H | -0.5658059 | 5.6672591  | 272.6236337 | C  | 2.0698526  | 8.9028624  | 268.6168877 |
| H | -1.9608945 | 6.3893672  | 271.7846848 | H  | 0.2401202  | 9.5792558  | 269.6953473 |
| H | -0.4780525 | 6.0828119  | 270.8649610 | H  | 0.4193495  | 10.2817203 | 268.0303192 |
| C | -2.8051749 | 3.8918964  | 272.2604190 | H  | 2.7833561  | 9.7205595  | 268.3982064 |
| H | -0.7918992 | 3.5507070  | 271.5521221 | H  | 2.3394526  | 9.0103521  | 270.7516303 |
| H | -2.5156909 | 4.0006710  | 273.3260771 |    |            |            |             |

15q-ma; COSMO

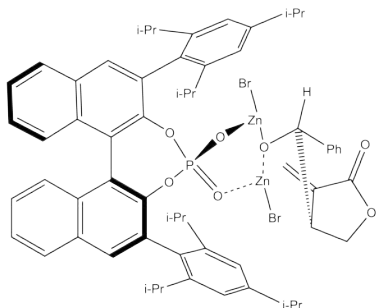

Energy (Hartree) = -11970.05608059

|    |            |            |             |
|----|------------|------------|-------------|
| C  | 7.2364070  | 4.7417615  | 284.2174974 |
| C  | 2.9610476  | 5.1451786  | 283.5827588 |
| C  | 6.7524741  | 5.8006611  | 283.4326047 |
| C  | 4.9499910  | 4.0405780  | 284.6599383 |
| C  | 4.4534566  | 5.0927857  | 283.8635429 |
| C  | 6.3299548  | 3.8648448  | 284.8379906 |
| C  | 5.3695668  | 5.9803982  | 283.2609538 |
| O  | 2.6801886  | 4.4425154  | 282.3743098 |
| H  | 8.3201481  | 4.6028343  | 284.3512877 |
| H  | 4.2394575  | 3.3465565  | 285.1341628 |
| H  | 7.4538551  | 6.4969860  | 282.9482233 |
| H  | 6.6999015  | 3.0367973  | 285.4623033 |
| H  | 5.0164619  | 6.8124645  | 282.6332586 |
| Br | -0.2493958 | 2.7931086  | 284.0262646 |
| Zn | 0.7751358  | 3.8877367  | 282.2915446 |
| H  | 3.0904230  | 6.8128488  | 285.6102933 |
| C  | 2.3626046  | 6.5889495  | 283.5190161 |
| C  | 2.3532549  | 7.2537089  | 284.9113337 |
| C  | 0.8990876  | 6.5350304  | 283.1964871 |
| C  | 0.2710041  | 6.3577122  | 282.0068202 |
| C  | 0.1401816  | 6.6960472  | 284.4881086 |
| O  | 1.0351464  | 7.0333205  | 285.4623854 |
| O  | -1.0469030 | 6.5731589  | 284.6862151 |
| H  | 2.5305781  | 8.3466192  | 284.8468962 |
| C  | 0.1004790  | 2.6469824  | 277.2102352 |
| C  | 0.3221456  | 1.3100515  | 276.8700793 |
| C  | -0.7576823 | 0.6023321  | 276.2233671 |
| C  | -0.7158854 | -0.7988487 | 275.9541599 |
| C  | -1.9534378 | 1.3315477  | 275.8644649 |
| C  | -3.0109199 | 0.6460531  | 275.1937779 |
| C  | -2.0902912 | 2.7028462  | 276.2316905 |
| H  | -3.0230550 | 3.2292574  | 275.9781052 |
| C  | -1.1030070 | 3.3684444  | 276.9474235 |
| C  | 3.1717488  | 0.0161093  | 279.1044927 |
| C  | 3.9193507  | -0.7319794 | 278.2036119 |
| H  | 4.7800828  | -1.3143987 | 278.5662221 |
| C  | 3.6070378  | -0.7603110 | 276.8118013 |
| C  | 4.4327557  | -1.4695174 | 275.8883817 |
| C  | 2.4486817  | -0.0515263 | 276.3174168 |
| C  | 2.2090747  | -0.0415982 | 274.9106056 |
| C  | 1.6051379  | 0.6489006  | 277.2551290 |
| C  | 2.0340758  | 0.7049375  | 278.5853843 |
| O  | 1.1245427  | 3.3628097  | 277.8258556 |
| O  | 1.2982005  | 1.4591949  | 279.5014800 |
| P  | 1.4908386  | 3.0805386  | 279.3845456 |
| O  | 0.4751717  | 3.6928460  | 280.3613496 |
| O  | 2.9602921  | 3.5075235  | 279.5149175 |
| C  | -2.9218158 | -0.7097546 | 274.9158167 |
| C  | -1.7701798 | -1.4383500 | 275.3158683 |
| H  | -3.9114067 | 1.2159538  | 274.9156586 |
| H  | -3.7479142 | -1.2256966 | 274.4032304 |
| H  | 0.1631557  | -1.3791498 | 276.2664412 |
| H  | -1.7139628 | -2.5208028 | 275.1242593 |
| C  | 3.0432901  | -0.7271671 | 274.0379214 |
| C  | 4.1569919  | -1.4595317 | 274.5290086 |

|   |            |            |             |
|---|------------|------------|-------------|
| H | 1.3554623  | 0.5286881  | 274.5179981 |
| H | 2.8419124  | -0.6982695 | 272.9561944 |
| H | 4.8065824  | -2.0059234 | 273.8283832 |
| H | 5.3056511  | -2.0166860 | 276.2778562 |
| C | -2.1094973 | 4.9348975  | 278.6527717 |
| C | -1.2545824 | 4.7406572  | 277.5291850 |
| C | -2.1523540 | 6.2078894  | 279.2520240 |
| C | -0.4609367 | 5.8171561  | 277.0454314 |
| C | -0.5370514 | 7.0652369  | 277.6886605 |
| C | -1.3677930 | 7.2832460  | 278.8009583 |
| H | -2.8098013 | 6.3660400  | 280.1226859 |
| C | 0.4595465  | 5.6669253  | 275.8359756 |
| H | 0.0843245  | 7.8912097  | 277.3103231 |
| C | 1.9085222  | 6.0822062  | 276.1475274 |
| H | 1.9883093  | 7.1661759  | 276.3714789 |
| H | 2.5659064  | 5.8759156  | 275.2778502 |
| H | 2.3063587  | 5.5281767  | 277.0199200 |
| C | -0.1029762 | 6.4376297  | 274.6262877 |
| H | 0.4764530  | 4.5942888  | 275.5538487 |
| H | -0.1513847 | 7.5275198  | 274.8325802 |
| H | -1.1280853 | 6.0978269  | 274.3739695 |
| H | 0.5386018  | 6.2913613  | 273.7325730 |
| C | -1.4528947 | 8.6418742  | 279.4869943 |
| C | -0.0869279 | 9.3284408  | 279.6488345 |
| H | -0.1840660 | 10.2464729 | 280.2635238 |
| H | 0.3366776  | 9.6349538  | 278.6698742 |
| H | 0.6547993  | 8.6639815  | 280.1367325 |
| C | -2.4496743 | 9.5573868  | 278.7494446 |
| H | -1.8612323 | 8.4591376  | 280.5062544 |
| H | -2.5600362 | 10.5301272 | 279.2723653 |
| H | -3.4512648 | 9.0875420  | 278.6780592 |
| H | -2.1001004 | 9.7628763  | 277.7156804 |
| C | -2.9753377 | 3.8134695  | 279.2289244 |
| C | -2.8932792 | 3.7020023  | 280.7610309 |
| H | -3.4728281 | 2.8246615  | 281.1137147 |
| H | -3.3118026 | 4.5932334  | 281.2731192 |
| H | -1.8483282 | 3.5687935  | 281.0980158 |
| C | -4.4383156 | 3.9710744  | 278.7698796 |
| H | -5.0621412 | 3.1323086  | 279.1426080 |
| H | -4.5217499 | 3.9965534  | 277.6646366 |
| H | -4.8731027 | 4.9164967  | 279.1572818 |
| H | 5.0245220  | 0.9654299  | 285.0326456 |
| H | 1.5937072  | -3.0987922 | 282.4143011 |
| H | 7.3489259  | 1.6343443  | 279.1349007 |
| C | 4.1916096  | 0.2438481  | 284.8800747 |
| H | -0.7942147 | -1.3752933 | 281.1469926 |
| H | 3.2043339  | 0.9426496  | 286.7119197 |
| H | 5.9826142  | 3.8416151  | 280.0307916 |
| C | 3.9394900  | 0.1797913  | 283.3798256 |
| C | 1.5442541  | -2.9199266 | 281.3198138 |
| C | 2.9630747  | 0.7719887  | 285.6424026 |
| H | 2.1212788  | 0.0501040  | 285.6028283 |
| C | 2.8663914  | -0.5583932 | 282.8538831 |
| C | 6.7252999  | 0.9952717  | 279.7939665 |
| H | 5.5651539  | -1.4755003 | 284.9152386 |
| C | 4.7583492  | 0.8766042  | 282.4769029 |
| C | 4.6532411  | -1.1165115 | 285.4338139 |
| H | 4.8763226  | -1.0477376 | 286.5187955 |
| H | 5.5853770  | 1.4803755  | 282.8828612 |
| C | 0.0829787  | -0.8453832 | 281.5724723 |
| H | 0.6797706  | -3.4936565 | 280.9263110 |
| H | 2.4678260  | -3.3365350 | 280.8685980 |
| C | 2.6042442  | -0.6219153 | 281.4746863 |
| C | 5.7384683  | 3.0866393  | 280.8074426 |
| C | 4.5344878  | 0.8571276  | 281.0860534 |
| H | 6.5233140  | 0.0486913  | 279.2559396 |
| H | 7.3210282  | 0.7492689  | 280.6978764 |
| C | 1.3922839  | -1.4216263 | 280.9999577 |
| C | 3.4596247  | 0.0771375  | 280.5756859 |
| C | 5.4185038  | 1.7129367  | 280.1790308 |
| H | -0.0148530 | 0.2326278  | 281.3388923 |

|    |            |            |             |
|----|------------|------------|-------------|
| H  | 4.8928413  | 3.4211193  | 281.4567614 |
| H  | 0.0375410  | -0.9530221 | 282.6760421 |
| H  | 2.5850239  | 1.7200024  | 285.2086727 |
| H  | 6.6013953  | 3.0605987  | 281.5040649 |
| H  | 3.8650158  | -1.8871300 | 285.3013220 |
| H  | 1.3355815  | -1.3354695 | 279.8959099 |
| H  | 4.8433636  | 1.9027570  | 279.2514330 |
| Zn | 3.6166461  | 4.8983808  | 280.7163655 |
| Br | 4.0942927  | 7.0048384  | 279.8922054 |
| H  | 2.1957801  | -1.0954482 | 283.5430974 |
| H  | -2.5974208 | 2.8551905  | 278.8177883 |
| H  | 2.9214328  | 7.1742416  | 282.7613194 |
| H  | 2.4387269  | 4.6075386  | 284.4089166 |
| H  | 0.8139992  | 6.3292621  | 281.0495710 |
| H  | -0.8310254 | 6.3344255  | 281.9735536 |

### 15q-ma

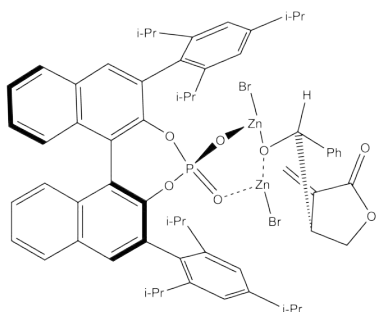

Energy (Hartree) = -11970.05407641

|    |            |            |             |
|----|------------|------------|-------------|
| C  | 7.2170297  | 4.7363964  | 284.2797067 |
| C  | 2.9508123  | 5.1350678  | 283.5767333 |
| C  | 6.7455633  | 5.7756233  | 283.4620011 |
| C  | 4.9237882  | 4.0468322  | 284.7034009 |
| C  | 4.4399926  | 5.0800235  | 283.8755299 |
| C  | 6.3008144  | 3.8750087  | 284.9063027 |
| C  | 5.3660834  | 5.9517797  | 283.2652455 |
| O  | 2.6787853  | 4.4419665  | 282.3625334 |
| H  | 8.2985081  | 4.6008703  | 284.4338012 |
| H  | 4.2061127  | 3.3625939  | 285.1811489 |
| H  | 7.4543545  | 6.4592668  | 282.9703572 |
| H  | 6.6598869  | 3.0614177  | 285.5554474 |
| H  | 5.0228387  | 6.7655858  | 282.6081537 |
| Br | -0.2185178 | 2.7595292  | 284.0199314 |
| Zn | 0.7742930  | 3.8669461  | 282.2838297 |
| H  | 3.0838562  | 6.7952391  | 285.6090257 |
| C  | 2.3556867  | 6.5803345  | 283.5181749 |
| C  | 2.3446086  | 7.2403171  | 284.9139103 |
| C  | 0.8921880  | 6.5299679  | 283.1951973 |
| C  | 0.2642956  | 6.3519006  | 282.0062074 |
| C  | 0.1299738  | 6.6940535  | 284.4862416 |
| O  | 1.0305328  | 7.0254070  | 285.4640623 |
| O  | -1.0562414 | 6.5818448  | 284.6789307 |
| H  | 2.5317367  | 8.3329955  | 284.8523703 |
| C  | 0.1029630  | 2.6483957  | 277.2024234 |
| C  | 0.3219919  | 1.3101268  | 276.8655506 |
| C  | -0.7605437 | 0.6018219  | 276.2239812 |
| C  | -0.7213218 | -0.7998653 | 275.9582858 |
| C  | -1.9565408 | 1.3311595  | 275.8668329 |
| C  | -3.0160035 | 0.6446899  | 275.2013284 |
| C  | -2.0907960 | 2.7030237  | 276.2317382 |
| H  | -3.0242764 | 3.2300659  | 275.9821061 |
| C  | -1.1012508 | 3.3700152  | 276.9426592 |
| C  | 3.1731548  | 0.0186820  | 279.0994006 |
| C  | 3.9147117  | -0.7372961 | 278.2005036 |
| H  | 4.7726062  | -1.3222205 | 278.5658995 |

|   |            |            |             |
|---|------------|------------|-------------|
| C | 3.5997392  | -0.7713987 | 276.8097085 |
| C | 4.4190472  | -1.4887383 | 275.8876084 |
| C | 2.4434642  | -0.0600197 | 276.3148129 |
| C | 2.2004981  | -0.0563631 | 274.9087922 |
| C | 1.6045822  | 0.6482215  | 277.2506859 |
| C | 2.0372203  | 0.7099247  | 278.5795967 |
| O | 1.1291725  | 3.3647630  | 277.8119948 |
| O | 1.3066565  | 1.4691436  | 279.4945297 |
| P | 1.4963313  | 3.0906545  | 279.3714132 |
| O | 0.4807066  | 3.7048908  | 280.3469017 |
| O | 2.9646904  | 3.5221657  | 279.5022332 |
| C | -2.9292919 | -0.7112858 | 274.9261647 |
| C | -1.7776287 | -1.4395757 | 275.3244876 |
| H | -3.9169267 | 1.2148077  | 274.9251431 |
| H | -3.7575232 | -1.2274548 | 274.4173917 |
| H | 0.1584088  | -1.3793687 | 276.2697269 |
| H | -1.7228342 | -2.5225038 | 275.1354604 |
| C | 3.0286618  | -0.7504309 | 274.0377926 |
| C | 4.1399052  | -1.4850289 | 274.5294371 |
| H | 1.3479768  | 0.5158431  | 274.5168866 |
| H | 2.8242763  | -0.7263086 | 272.9565654 |
| H | 4.7851766  | -2.0381610 | 273.8301966 |
| H | 5.2906493  | -2.0375911 | 276.2776388 |
| C | -2.1075862 | 4.9365626  | 278.6473843 |
| C | -1.2514492 | 4.7419639  | 277.5249302 |
| C | -2.1479072 | 6.2086824  | 279.2479515 |
| C | -0.4543586 | 5.8170840  | 277.0440447 |
| C | -0.5272562 | 7.0635083  | 277.6901179 |
| C | -1.3594228 | 7.2822907  | 278.8007935 |
| H | -2.8070516 | 6.3668097  | 280.1173940 |
| C | 0.4646059  | 5.6680374  | 275.8332586 |
| H | 0.0980398  | 7.8877989  | 277.3148748 |
| C | 1.9147101  | 6.0808475  | 276.1420624 |
| H | 1.9975342  | 7.1634304  | 276.3710962 |
| H | 2.5693238  | 5.8786173  | 275.2694778 |
| H | 2.3163906  | 5.5219191  | 277.0092932 |
| C | -0.1005735 | 6.4410570  | 274.6263519 |
| H | 0.4796179  | 4.5958496  | 275.5492240 |
| H | -0.1482790 | 7.5305407  | 274.8342673 |
| H | -1.1266900 | 6.1031505  | 274.3763716 |
| H | 0.5382450  | 6.2965823  | 273.7304321 |
| C | -1.4427422 | 8.6402897  | 279.4882587 |
| C | -0.0767164 | 9.3267598  | 279.6488321 |
| H | -0.1724260 | 10.2438347 | 280.2651473 |
| H | 0.3448162  | 9.6363089  | 278.6700176 |
| H | 0.6673059  | 8.6622314  | 280.1326950 |
| C | -2.4414194 | 9.5559303  | 278.7537256 |
| H | -1.8486157 | 8.4564816  | 280.5084865 |
| H | -2.5518295 | 10.5285252 | 279.2768138 |
| H | -3.4425498 | 9.0854730  | 278.6829192 |
| H | -2.0944936 | 9.7617775  | 277.7193207 |
| C | -2.9765182 | 3.8170261  | 279.2226844 |
| C | -2.8871575 | 3.6974590  | 280.7537656 |
| H | -3.4691917 | 2.8219699  | 281.1064618 |
| H | -3.2980544 | 4.5875453  | 281.2738428 |
| H | -1.8416570 | 3.5566608  | 281.0855157 |
| C | -4.4406582 | 3.9847899  | 278.7715519 |
| H | -5.0678966 | 3.1482101  | 279.1431993 |
| H | -4.5295297 | 4.0166609  | 277.6669404 |
| H | -4.8689199 | 4.9306993  | 279.1645630 |
| H | 5.0244804  | 0.9932446  | 285.0217726 |
| H | 1.5993112  | -3.0874284 | 282.4218560 |
| H | 7.3453604  | 1.6365870  | 279.1145763 |
| C | 4.2023967  | 0.2585881  | 284.8717834 |
| H | -0.7881955 | -1.3721424 | 281.1443824 |
| H | 3.2165955  | 0.9366815  | 286.7126275 |
| H | 5.9980295  | 3.8456274  | 280.0130445 |
| C | 3.9447276  | 0.1953721  | 283.3724585 |
| C | 1.5515813  | -2.9132674 | 281.3266412 |
| C | 2.9708864  | 0.7633658  | 285.6445031 |
| H | 2.1416321  | 0.0269151  | 285.6123581 |

|    |            |            |             |
|----|------------|------------|-------------|
| C  | 2.8729532  | -0.5460480 | 282.8495072 |
| C  | 6.7206000  | 1.0001065  | 279.7751815 |
| H  | 5.6047037  | -1.4378971 | 284.8902475 |
| C  | 4.7602682  | 0.8928305  | 282.4673617 |
| C  | 4.6904523  | -1.0963333 | 285.4160797 |
| H  | 4.9179574  | -1.0308665 | 286.5003635 |
| H  | 5.5853566  | 1.5004879  | 282.8715033 |
| C  | 0.0882345  | -0.8383230 | 281.5662966 |
| H  | 0.6884787  | -3.4902613 | 280.9350648 |
| H  | 2.4764698  | -3.3314882 | 280.8800228 |
| C  | 2.6097419  | -0.6140476 | 281.4710234 |
| C  | 5.7440927  | 3.0954051  | 280.7909241 |
| C  | 4.5359992  | 0.8686779  | 281.0769787 |
| H  | 6.5135802  | 0.0552093  | 279.2364142 |
| H  | 7.3183612  | 0.7495245  | 280.6764319 |
| C  | 1.3987265  | -1.4168295 | 280.9991285 |
| C  | 3.4630193  | 0.0842725  | 280.5699628 |
| C  | 5.4179988  | 1.7222495  | 280.1657000 |
| H  | -0.0119508 | 0.2376294  | 281.3252565 |
| H  | 4.8943997  | 3.4438668  | 281.4254647 |
| H  | 0.0408138  | -0.9362454 | 282.6705369 |
| H  | 2.5693829  | 1.7035515  | 285.2151071 |
| H  | 6.6013775  | 3.0641991  | 281.4945020 |
| H  | 3.9151106  | -1.8795897 | 285.2828876 |
| H  | 1.3439844  | -1.3366159 | 279.8944586 |
| H  | 4.8388559  | 1.9135576  | 279.2407337 |
| Zn | 3.5795378  | 4.9352570  | 280.6964480 |
| Br | 4.0695583  | 7.0487795  | 279.9157332 |
| H  | 2.2035989  | -1.0821245 | 283.5405215 |
| H  | -2.6061095 | 2.8585644  | 278.8053051 |
| H  | 2.9176399  | 7.1647947  | 282.7614152 |
| H  | 2.4188370  | 4.5932849  | 284.3945349 |
| H  | 0.8043908  | 6.3205479  | 281.0475612 |
| H  | -0.8378119 | 6.3275320  | 281.9774328 |

### 15q-mi; COSMO

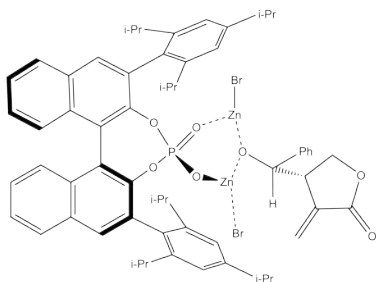

Energy (Hartree) = -11970.04831063

|   |            |            |             |
|---|------------|------------|-------------|
| C | -6.2348369 | -3.4495917 | 508.1105065 |
| C | -5.6436253 | -4.6466047 | 508.5323335 |
| C | -6.3081326 | -5.3787087 | 509.5834790 |
| C | -5.7174851 | -6.5115106 | 510.2198096 |
| C | -7.6021080 | -4.9301013 | 510.0432101 |
| C | -8.2624077 | -5.6578956 | 511.0782722 |
| C | -8.2025775 | -3.7792517 | 509.4525499 |
| H | -9.2223594 | -3.4946689 | 509.7543350 |
| C | -7.5376689 | -3.0178637 | 508.4994132 |
| C | -2.0453618 | -4.6031655 | 507.1544191 |
| C | -1.9187597 | -5.8947204 | 506.6602705 |
| H | -0.9687808 | -6.2120823 | 506.2035936 |
| C | -3.0095741 | -6.8151009 | 506.6842043 |
| C | -2.8835948 | -8.1108475 | 506.0988064 |
| C | -4.2789700 | -6.4224354 | 507.2546016 |
| C | -5.3791886 | -7.3237821 | 507.1403005 |
| C | -4.3874024 | -5.1262710 | 507.8835671 |
| C | -3.2845898 | -4.2789892 | 507.7940350 |
| O | -5.5678925 | -2.6357075 | 507.1917963 |
| O | -3.3650959 | -3.0251373 | 508.4042184 |
| P | -4.2270614 | -1.8432650 | 507.7070175 |

|   |             |            |             |
|---|-------------|------------|-------------|
| O | -4.5064817  | -0.8408180 | 508.8428891 |
| O | -3.5909705  | -1.2692024 | 506.4316574 |
| C | -7.6680143  | -6.7666695 | 511.6625583 |
| C | -6.3798283  | -7.1869731 | 511.2358767 |
| H | -9.2534195  | -5.3129647 | 511.4125671 |
| H | -8.1862683  | -7.3144582 | 512.4642408 |
| H | -4.7167699  | -6.8396684 | 509.9052969 |
| H | -5.8994176  | -8.0518818 | 511.7181660 |
| C | -5.2268063  | -8.5694686 | 506.5456707 |
| C | -3.9657209  | -8.9763729 | 506.0354106 |
| H | -6.3632361  | -7.0203500 | 507.5232969 |
| H | -6.0929400  | -9.2439478 | 506.4658633 |
| H | -3.8539683  | -9.9697426 | 505.5748333 |
| H | -1.9082164  | -8.4038616 | 505.6795895 |
| C | -8.2346188  | -0.5687473 | 508.3334070 |
| C | -8.1901164  | -1.8746354 | 507.7785303 |
| C | -8.9214223  | 0.4419786  | 507.6319629 |
| C | -8.7720257  | -2.1280386 | 506.5039024 |
| C | -9.4310449  | -1.0798034 | 505.8390479 |
| C | -9.5362950  | 0.2082737  | 506.3910398 |
| H | -8.9739109  | 1.4545341  | 508.0617953 |
| C | -8.6650959  | -3.4893809 | 505.8179078 |
| H | -9.8760954  | -1.2784713 | 504.8511180 |
| C | -7.7087174  | -3.4165791 | 504.6112136 |
| H | -8.1073442  | -2.7425748 | 503.8244903 |
| H | -7.5685246  | -4.4213182 | 504.1609191 |
| H | -6.7163616  | -3.0253496 | 504.9095354 |
| C | -10.0394990 | -4.0553870 | 505.4211372 |
| H | -8.2242599  | -4.2019601 | 506.5442951 |
| H | -10.5407427 | -3.4246746 | 504.6576689 |
| H | -10.7154395 | -4.1249647 | 506.2976701 |
| H | -9.9307798  | -5.0715960 | 504.9891922 |
| C | -10.2819330 | 1.3181257  | 505.6611136 |
| C | -9.6077628  | 1.6740301  | 504.3240087 |
| H | -10.1125806 | 2.5378337  | 503.8438866 |
| H | -9.6513723  | 0.8218574  | 503.6142202 |
| H | -8.5368289  | 1.9241577  | 504.4610967 |
| C | -11.7686383 | 0.9716277  | 505.4642453 |
| H | -10.2361054 | 2.2171395  | 506.3148104 |
| H | -12.3102964 | 1.8140431  | 504.9863117 |
| H | -12.2626258 | 0.7474729  | 506.4312508 |
| H | -11.8903024 | 0.0829541  | 504.8101851 |
| C | -7.5537627  | -0.2396350 | 509.6596954 |
| C | -6.8246684  | 1.1155014  | 509.6202680 |
| H | -6.1296835  | 1.2186966  | 510.4791608 |
| H | -7.5131360  | 1.9841861  | 509.6629098 |
| H | -6.2746028  | 1.2364434  | 508.6580222 |
| C | -8.5443978  | -0.2872858 | 510.8373081 |
| H | -6.7827855  | -1.0171955 | 509.8337186 |
| H | -8.0318901  | -0.0608609 | 511.7951565 |
| H | -9.0115192  | -1.2879834 | 510.9287338 |
| H | -9.3588202  | 0.4544924  | 510.6993902 |
| H | 0.5053108   | 0.8819167  | 505.7161649 |
| H | 1.5980921   | -3.4038123 | 509.8981847 |
| C | 0.5821781   | 0.5352817  | 506.7687883 |
| H | -1.1513265  | -3.2072039 | 511.5964574 |
| H | -0.1105915  | 2.4793618  | 507.5195469 |
| H | -3.2026904  | -3.7641039 | 503.2093373 |
| C | 0.1309049   | -0.9168270 | 506.8171235 |
| C | 0.8118719   | -4.1849434 | 509.8310328 |
| C | -0.3737551  | 1.4065314  | 507.6069980 |
| H | -0.3382792  | 1.1365838  | 508.6825939 |
| C | 0.0781125   | -1.6047722 | 508.0418595 |
| C | -0.5146919  | -3.2144611 | 503.2111907 |
| H | 2.7320808   | 0.1087610  | 506.5966248 |
| C | -0.3106654  | -1.5913603 | 505.6665096 |
| C | 2.0428370   | 0.7225008  | 507.2113586 |
| H | 2.3447315   | 1.7851778  | 507.1108070 |
| H | -0.2249266  | -1.0779753 | 504.6963031 |
| C | -1.0252558  | -2.6309623 | 510.6570530 |
| H | 0.7883671   | -4.7285267 | 510.7984792 |

|    |            |            |             |
|----|------------|------------|-------------|
| H  | 1.1162548  | -4.9000387 | 509.0399827 |
| C  | -0.5210972 | -2.8677944 | 508.1574796 |
| C  | -2.8745054 | -3.2167092 | 504.1170175 |
| C  | -0.9008105 | -2.8698853 | 505.7178592 |
| C  | -0.5610017 | -3.5568101 | 509.5197925 |
| C  | -1.0688546 | -3.4806300 | 506.9953447 |
| C  | -1.3989059 | -3.5327604 | 504.4279944 |
| H  | -1.9937867 | -2.1515735 | 510.4134725 |
| H  | -3.5467730 | -3.4992001 | 504.9496044 |
| H  | -0.2879765 | -1.8278583 | 510.8643706 |
| H  | -1.4233007 | 1.2805745  | 507.2684291 |
| H  | -3.0220918 | -2.1328096 | 503.9331626 |
| H  | 2.1863666  | 0.4315014  | 508.2733443 |
| H  | -1.2891590 | -4.3919381 | 509.4543959 |
| H  | -1.3373062 | -4.6287193 | 504.5843970 |
| H  | 0.4727363  | -1.1183688 | 508.9473989 |
| Zn | -4.0001250 | 1.0427751  | 508.8058779 |
| Br | -3.0340834 | 2.2898650  | 510.4715206 |
| C  | -7.6462576 | 4.8449123  | 508.0698318 |
| C  | -3.9657482 | 3.0001119  | 506.6923521 |
| C  | -7.6645960 | 3.9638060  | 506.9738861 |
| C  | -5.2391473 | 4.5464794  | 508.2572309 |
| C  | -5.2501540 | 3.6669007  | 507.1569462 |
| C  | -6.4324441 | 5.1308909  | 508.7141709 |
| C  | -6.4767693 | 3.3704341  | 506.5254354 |
| O  | -4.0392784 | 1.5877805  | 506.9129801 |
| H  | -8.5818317 | 5.3054798  | 508.4226057 |
| H  | -4.2891272 | 4.7558034  | 508.7732855 |
| H  | -8.6130872 | 3.7346659  | 506.4659474 |
| H  | -6.4110004 | 5.8110262  | 509.5793184 |
| H  | -6.5082532 | 2.6575023  | 505.6850202 |
| Br | -5.8604499 | 0.2703101  | 503.7695498 |
| Zn | -4.3875666 | 0.2667572  | 505.5380837 |
| C  | -3.2159240 | 4.8109092  | 505.0923706 |
| C  | -2.3951725 | 2.6545034  | 504.7074528 |
| C  | -2.2178579 | 1.5023238  | 504.0295918 |
| C  | -1.2528693 | 3.5886831  | 504.9944797 |
| O  | -1.7805148 | 4.8164029  | 505.2830411 |
| O  | -0.0598165 | 3.3757453  | 504.9665322 |
| H  | -0.6146993 | -2.1567245 | 502.8894589 |
| H  | -0.8148476 | -3.8424247 | 502.3477960 |
| H  | 0.5575168  | -3.4041005 | 503.4203037 |
| C  | -3.6451564 | 3.3324063  | 505.2002945 |
| H  | -3.4445359 | 5.2302198  | 504.0911383 |
| H  | -3.6632471 | 5.4612609  | 505.8680237 |
| H  | -4.5280565 | 3.0983574  | 504.5714422 |
| H  | -1.2007212 | 1.1812525  | 503.7543870 |
| H  | -3.0636098 | 0.9003696  | 503.6515699 |
| H  | -3.1220948 | 3.3902571  | 507.3075247 |

### 15q-mi



Energy (Hartree) = -11970.03706454

|   |            |            |             |
|---|------------|------------|-------------|
| C | -6.2443468 | -3.4590886 | 508.1009098 |
| C | -5.6499529 | -4.6536103 | 508.5253033 |
| C | -6.3126179 | -5.3842629 | 509.5786530 |
| C | -5.7201338 | -6.5145155 | 510.2173137 |
| C | -7.6072717 | -4.9374180 | 510.0377875 |
| C | -8.2657076 | -5.6654312 | 511.0732528 |
| C | -8.2085283 | -3.7871681 | 509.4473330 |

|   |             |            |             |
|---|-------------|------------|-------------|
| H | -9.2276423  | -3.5012734 | 509.7501513 |
| C | -7.5455163  | -3.0255345 | 508.4934701 |
| C | -2.0478649  | -4.6003927 | 507.1562900 |
| C | -1.9138596  | -5.8947968 | 506.6721315 |
| H | -0.9593323  | -6.2099914 | 506.2233237 |
| C | -3.0000111  | -6.8201776 | 506.6969169 |
| C | -2.8663460  | -8.1190238 | 506.1213389 |
| C | -4.2732920  | -6.4297597 | 507.2597530 |
| C | -5.3682282  | -7.3374458 | 507.1478750 |
| C | -4.3905753  | -5.1302293 | 507.8800452 |
| C | -3.2916300  | -4.2776998 | 507.7880388 |
| O | -5.5829134  | -2.6488506 | 507.1765726 |
| O | -3.3788719  | -3.0207450 | 508.3880872 |
| P | -4.2451964  | -1.8464416 | 507.6838156 |
| O | -4.5284411  | -0.8360478 | 508.8104309 |
| O | -3.6153359  | -1.2801221 | 506.4015647 |
| C | -7.6700977  | -6.7721287 | 511.6589232 |
| C | -6.3813904  | -7.1900032 | 511.2334551 |
| H | -9.2571016  | -5.3213964 | 511.4073234 |
| H | -8.1877436  | -7.3196670 | 512.4610875 |
| H | -4.7188327  | -6.8403107 | 509.9026886 |
| H | -5.8991994  | -8.0531866 | 511.7169342 |
| C | -5.2075362  | -8.5862339 | 506.5630210 |
| C | -3.9432817  | -8.9902823 | 506.0600841 |
| H | -6.3544802  | -7.0354163 | 507.5260542 |
| H | -6.0700239  | -9.2655287 | 506.4853096 |
| H | -3.8246893  | -9.9861260 | 505.6067697 |
| H | -1.8880599  | -8.4101876 | 505.7076213 |
| C | -8.2395904  | -0.5750720 | 508.3413888 |
| C | -8.1957164  | -1.8775358 | 507.7781773 |
| C | -8.9242233  | 0.4401695  | 507.6447729 |
| C | -8.7736867  | -2.1216552 | 506.5001823 |
| C | -9.4309268  | -1.0688793 | 505.8414047 |
| C | -9.5373566  | 0.2149646  | 506.4018235 |
| H | -8.9755052  | 1.4503160  | 508.0803445 |
| C | -8.6652853  | -3.4773478 | 505.8035076 |
| H | -9.8733119  | -1.2608430 | 504.8510011 |
| C | -7.7194308  | -3.3918312 | 504.5895352 |
| H | -8.1257489  | -2.7141106 | 503.8101417 |
| H | -7.5785118  | -4.3923778 | 504.1304683 |
| H | -6.7259601  | -2.9993471 | 504.8818343 |
| C | -10.0407839 | -4.0464288 | 505.4151839 |
| H | -8.2155140  | -4.1930858 | 506.5213052 |
| H | -10.5524472 | -3.4118838 | 504.6619577 |
| H | -10.7085331 | -4.1256312 | 506.2969537 |
| H | -9.9326414  | -5.0584066 | 504.9733907 |
| C | -10.2836478 | 1.3289937  | 505.6790136 |
| C | -9.6178290  | 1.6868685  | 504.3384131 |
| H | -10.1215931 | 2.5545130  | 503.8641009 |
| H | -9.6706177  | 0.8382447  | 503.6252176 |
| H | -8.5443233  | 1.9299361  | 504.4669099 |
| C | -11.7727208 | 0.9875862  | 505.4924168 |
| H | -10.2304127 | 2.2258949  | 506.3354445 |
| H | -12.3163668 | 1.8313708  | 505.0192046 |
| H | -12.2601000 | 0.7624386  | 506.4622860 |
| H | -11.9016128 | 0.0998367  | 504.8387228 |
| C | -7.5583154  | -0.2526099 | 509.6694040 |
| C | -6.8354000  | 1.1062486  | 509.6390690 |
| H | -6.1337841  | 1.2047234  | 510.4929695 |
| H | -7.5285115  | 1.9706063  | 509.6953182 |
| H | -6.2874301  | 1.2382123  | 508.6783788 |
| C | -8.5471889  | -0.3142577 | 510.8477034 |
| H | -6.7831133  | -1.0276274 | 509.8361166 |
| H | -8.0358405  | -0.0893472 | 511.8065011 |
| H | -9.0070231  | -1.3185164 | 510.9351209 |
| H | -9.3676133  | 0.4217581  | 510.7149958 |
| H | 0.5087896   | 0.8816579  | 505.7036673 |
| H | 1.5726953   | -3.3696304 | 509.9179713 |
| C | 0.5858620   | 0.5369970  | 506.7569576 |
| H | -1.1886382  | -3.1758989 | 511.5962850 |
| H | -0.0882827  | 2.4892692  | 507.5002926 |

|    |            |            |             |
|----|------------|------------|-------------|
| H  | -3.1821949 | -3.7811062 | 503.1961382 |
| C  | 0.1259104  | -0.9120331 | 506.8115749 |
| C  | 0.7907272  | -4.1547579 | 509.8504977 |
| C  | -0.3595726 | 1.4192823  | 507.5949313 |
| H  | -0.3232566 | 1.1562198  | 508.6721291 |
| C  | 0.0634757  | -1.5926985 | 508.0396773 |
| C  | -0.4944959 | -3.2313053 | 503.2161439 |
| H  | 2.7313160  | 0.0915576  | 506.5795959 |
| C  | -0.3093912 | -1.5932654 | 505.6628381 |
| C  | 2.0496479  | 0.7147660  | 507.1929061 |
| H  | 2.3592904  | 1.7741686  | 507.0844248 |
| H  | -0.2158201 | -1.0859330 | 504.6902242 |
| C  | -1.0612219 | -2.6057658 | 510.6534097 |
| H  | 0.7639201  | -4.6924595 | 510.8211037 |
| H  | 1.1051065  | -4.8723788 | 509.0659347 |
| C  | -0.5356972 | -2.8549862 | 508.1590801 |
| C  | -2.8613993 | -3.2300473 | 504.1041854 |
| C  | -0.8990868 | -2.8715444 | 505.7174295 |
| C  | -0.5829094 | -3.5357082 | 509.5254082 |
| C  | -1.0742516 | -3.4755727 | 506.9968931 |
| C  | -1.3879240 | -3.5422154 | 504.4280401 |
| H  | -2.0319705 | -2.1352821 | 510.4022062 |
| H  | -3.5397776 | -3.5112102 | 504.9320903 |
| H  | -0.3318447 | -1.7955917 | 510.8606711 |
| H  | -1.4113560 | 1.2996628  | 507.2604975 |
| H  | -3.0104051 | -2.1472774 | 503.9155745 |
| H  | 2.1953153  | 0.4281379  | 508.2557390 |
| H  | -1.3062953 | -4.3750317 | 509.4594111 |
| H  | -1.3268196 | -4.6372745 | 504.5914907 |
| H  | 0.4529296  | -1.1011885 | 508.9446243 |
| Zn | -3.9610412 | 1.0298359  | 508.7954509 |
| Br | -3.0138578 | 2.2827004  | 510.4573172 |
| C  | -7.6364980 | 4.8332221  | 508.0718739 |
| C  | -3.9575590 | 2.9918076  | 506.6856640 |
| C  | -7.6538903 | 3.9669855  | 506.9646087 |
| C  | -5.2320882 | 4.5213342  | 508.2665637 |
| C  | -5.2415632 | 3.6579662  | 507.1535639 |
| C  | -6.4248228 | 5.1042057  | 508.7258310 |
| C  | -6.4667377 | 3.3746954  | 506.5135274 |
| O  | -4.0309177 | 1.5801867  | 506.9023883 |
| H  | -8.5713963 | 5.2936655  | 508.4266549 |
| H  | -4.2843837 | 4.7141037  | 508.7932732 |
| H  | -8.6002882 | 3.7471222  | 506.4488077 |
| H  | -6.4045055 | 5.7707015  | 509.6014715 |
| H  | -6.4979597 | 2.6714174  | 505.6649822 |
| Br | -5.8660759 | 0.3151410  | 503.7483639 |
| Zn | -4.4180141 | 0.2662230  | 505.5317917 |
| C  | -3.2069803 | 4.8098545  | 505.0947820 |
| C  | -2.3880176 | 2.6571395  | 504.6959070 |
| C  | -2.2103586 | 1.5096930  | 504.0109641 |
| C  | -1.2443033 | 3.5897610  | 504.9890148 |
| O  | -1.7760583 | 4.8175399  | 505.2874336 |
| O  | -0.0539554 | 3.3752330  | 504.9598899 |
| H  | -0.5945491 | -2.1764660 | 502.8852085 |
| H  | -0.7855070 | -3.8656727 | 502.3543521 |
| H  | 0.5764685  | -3.4154683 | 503.4353938 |
| C  | -3.6379704 | 3.3303194  | 505.1947684 |
| H  | -3.4385813 | 5.2343869  | 504.0951645 |
| H  | -3.6601912 | 5.4549130  | 505.8721140 |
| H  | -4.5217331 | 3.0969204  | 504.5665941 |
| H  | -1.1911179 | 1.1963871  | 503.7343076 |
| H  | -3.0550371 | 0.9032504  | 503.6389248 |
| H  | -3.1131848 | 3.3798614  | 507.3015823 |

### 15r-ma; COSMO

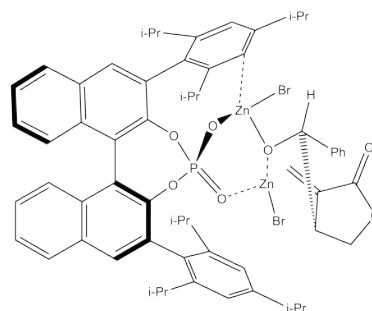

Energy (Hartree) = -11970.06557182

|   |             |             |              |
|---|-------------|-------------|--------------|
| C | -37.1895298 | -57.7307894 | 3568.2495625 |
| C | -36.5380872 | -58.8811120 | 3568.7181703 |
| C | -37.2221522 | -59.6775358 | 3569.7102041 |
| C | -36.5960777 | -60.7600075 | 3570.3993286 |
| C | -38.5852115 | -59.3483483 | 3570.0550708 |
| C | -39.2783525 | -60.1539346 | 3571.0084240 |
| C | -39.2043276 | -58.2038838 | 3569.4756082 |
| H | -40.2436450 | -57.9671569 | 3569.7490252 |
| C | -38.5177875 | -57.3546486 | 3568.6161371 |
| C | -32.8503458 | -58.4391895 | 3567.7215290 |
| C | -32.4950031 | -59.7282727 | 3567.3484657 |
| H | -31.4668610 | -59.9414252 | 3567.0189505 |
| C | -33.4577168 | -60.7803001 | 3567.3056040 |
| C | -33.0995434 | -62.0755211 | 3566.8239008 |
| C | -34.8316062 | -60.5210582 | 3567.6742257 |
| C | -35.7940312 | -61.5516593 | 3567.4572286 |
| C | -35.1751294 | -59.2278892 | 3568.2194117 |
| C | -34.1792307 | -58.2506093 | 3568.2213446 |
| O | -36.5563484 | -56.9028648 | 3567.3219282 |
| O | -34.4780771 | -56.9977651 | 3568.7489472 |
| P | -35.3060992 | -55.9603343 | 3567.7899450 |
| O | -35.7002434 | -54.8017106 | 3568.7239208 |
| O | -34.5811121 | -55.5939529 | 3566.4976219 |
| C | -38.6498646 | -61.2201937 | 3571.6337003 |
| C | -37.2915940 | -61.5115266 | 3571.3368485 |
| H | -40.3215984 | -59.8979686 | 3571.2512792 |
| H | -39.1937351 | -61.8286657 | 3572.3721443 |
| H | -35.5425685 | -60.9913755 | 3570.1905298 |
| H | -36.7825433 | -62.3362241 | 3571.8586633 |
| C | -35.4159561 | -62.7930734 | 3566.9632453 |
| C | -34.0554913 | -63.0672315 | 3566.6619072 |
| H | -36.8511161 | -61.3524889 | 3567.6804676 |
| H | -36.1792295 | -63.5691250 | 3566.8002018 |
| H | -33.7660954 | -64.0585281 | 3566.2812901 |
| H | -32.0470758 | -62.2650602 | 3566.5605393 |
| C | -39.2721407 | -54.9684925 | 3568.9818834 |
| C | -39.1051937 | -56.0761578 | 3568.1002750 |
| C | -39.8158477 | -53.7761564 | 3568.4687669 |
| C | -39.4642693 | -55.9544556 | 3566.7299596 |
| C | -40.0120641 | -54.7407933 | 3566.2725203 |
| C | -40.1961678 | -53.6359101 | 3567.1216410 |
| H | -39.9269756 | -52.9068618 | 3569.1357976 |
| C | -39.2921413 | -57.1036449 | 3565.7380903 |
| H | -40.2923745 | -54.6568153 | 3565.2114481 |
| C | -38.3644045 | -56.7215880 | 3564.5696493 |
| H | -38.7930999 | -55.8994402 | 3563.9593603 |
| H | -38.2113321 | -57.5896370 | 3563.8955092 |
| H | -37.3709995 | -56.3972778 | 3564.9370659 |
| C | -40.6565693 | -57.6119359 | 3565.2360705 |
| H | -38.8135590 | -57.9477857 | 3566.2752143 |
| H | -41.1988720 | -56.8252598 | 3564.6709101 |
| H | -41.3039493 | -57.9252898 | 3566.0802508 |
| H | -40.5270034 | -58.4820604 | 3564.5595459 |
| C | -40.7995786 | -52.3221261 | 3566.6389519 |
| C | -40.4038761 | -51.9534277 | 3565.2019115 |

|    |             |             |              |    |             |             |              |
|----|-------------|-------------|--------------|----|-------------|-------------|--------------|
| H  | -40.7627726 | -50.9341531 | 3564.9530128 | Br | -33.7204671 | -54.1305695 | 3563.4115869 |
| H  | -40.8477132 | -52.6466000 | 3564.4567168 | Zn | -33.2973828 | -54.2759392 | 3565.7356488 |
| H  | -39.3035153 | -51.9700973 | 3565.0667544 | H  | -34.6351348 | -49.0113643 | 3565.5880741 |
| C  | -42.3316597 | -52.3448659 | 3566.8056640 | C  | -35.1042672 | -51.1898275 | 3565.5942181 |
| H  | -40.3921641 | -51.5310254 | 3567.3041759 | C  | -35.4804606 | -49.7042219 | 3565.4117820 |
| H  | -42.7775164 | -51.3704401 | 3566.5163359 | C  | -36.3209956 | -51.7221433 | 3566.2922192 |
| H  | -42.6197868 | -52.5569883 | 3567.8551003 | C  | -36.7521859 | -53.0022820 | 3566.4188572 |
| H  | -42.7852458 | -53.1321176 | 3566.1667732 | C  | -37.0683082 | -50.5525087 | 3566.8771878 |
| C  | -38.8934500 | -55.0359186 | 3570.4617662 | O  | -36.5020621 | -49.4104006 | 3566.3950978 |
| C  | -38.0803739 | -53.8196781 | 3570.9345876 | O  | -38.0192657 | -50.5583159 | 3567.6284114 |
| H  | -37.7688155 | -53.9555778 | 3571.9905460 | H  | -35.8995714 | -49.5076142 | 3564.4039095 |
| H  | -38.6635349 | -52.8772571 | 3570.8856327 | H  | -34.9180727 | -51.7100792 | 3564.6327227 |
| H  | -37.1652506 | -53.6845594 | 3570.3299905 | H  | -34.0449447 | -50.7704914 | 3567.4347123 |
| C  | -40.1511571 | -55.2215916 | 3571.3339332 | H  | -36.2451218 | -53.8259779 | 3565.8929202 |
| H  | -38.2504901 | -55.9292764 | 3570.6015238 | H  | -37.6778424 | -53.2229643 | 3566.9762390 |
| H  | -39.8766087 | -55.3183486 | 3572.4047903 |    |             |             |              |
| H  | -40.7268007 | -56.1237363 | 3571.0449932 |    |             |             |              |
| H  | -40.8299209 | -54.3485182 | 3571.2346941 |    |             |             |              |
| H  | -30.7546645 | -52.7562379 | 3566.0613584 |    |             |             |              |
| H  | -29.7331349 | -56.4437613 | 3570.6196726 |    |             |             |              |
| H  | -31.3126108 | -57.9953415 | 3562.9296273 |    |             |             |              |
| C  | -30.2075850 | -53.2724691 | 3566.8796345 |    |             |             |              |
| H  | -32.6779495 | -56.2969326 | 3571.9772665 |    |             |             |              |
| H  | -29.8007929 | -51.3661205 | 3567.8424508 |    |             |             |              |
| H  | -33.5940354 | -58.5744728 | 3563.7791100 |    |             |             |              |
| C  | -30.9052602 | -54.6060373 | 3567.1116951 |    |             |             |              |
| C  | -30.4337425 | -57.3043312 | 3570.5897634 |    |             |             |              |
| C  | -30.2294103 | -52.3517867 | 3568.1039849 |    |             |             |              |
| H  | -29.6253468 | -52.7654378 | 3568.9383364 |    |             |             |              |
| C  | -31.1305980 | -55.1110329 | 3568.3984869 |    |             |             |              |
| C  | -31.2120366 | -57.2230747 | 3563.7182178 |    |             |             |              |
| H  | -28.7389262 | -54.1302289 | 3565.4681180 |    |             |             |              |
| C  | -31.2554012 | -55.4357498 | 3566.0060383 |    |             |             |              |
| C  | -28.7657567 | -53.5060819 | 3566.3838078 |    |             |             |              |
| H  | -28.2809497 | -52.5368169 | 3566.1487660 |    |             |             |              |
| H  | -30.9411983 | -55.1169830 | 3564.9986975 |    |             |             |              |
| C  | -32.4848382 | -55.8462468 | 3570.9829346 |    |             |             |              |
| H  | -30.5227285 | -57.7057030 | 3571.6200682 |    |             |             |              |
| H  | -29.9790667 | -58.0889942 | 3569.9517788 |    |             |             |              |
| C  | -31.6791435 | -56.3876083 | 3568.6189318 |    |             |             |              |
| C  | -33.5033344 | -57.8259120 | 3564.5920253 |    |             |             |              |
| C  | -31.7708426 | -56.7520792 | 3566.1787487 |    |             |             |              |
| H  | -30.1317420 | -57.1039150 | 3563.9390898 |    |             |             |              |
| H  | -31.5932727 | -56.2728288 | 3563.2906798 |    |             |             |              |
| C  | -31.8168361 | -56.8773409 | 3570.0568050 |    |             |             |              |
| C  | -32.0302980 | -57.2040202 | 3567.5081130 |    |             |             |              |
| C  | -32.0136201 | -57.6484280 | 3564.9581854 |    |             |             |              |
| H  | -33.4528596 | -55.4984394 | 3570.5721442 |    |             |             |              |
| H  | -34.1137266 | -58.1735832 | 3565.4455250 |    |             |             |              |
| H  | -31.8416515 | -54.9573312 | 3571.1485664 |    |             |             |              |
| H  | -31.2637477 | -52.1871667 | 3568.4661039 |    |             |             |              |
| H  | -33.9387148 | -56.8727404 | 3564.2357265 |    |             |             |              |
| H  | -28.1596633 | -54.0166375 | 3567.1611347 |    |             |             |              |
| H  | -32.4531136 | -57.7846238 | 3570.0485885 |    |             |             |              |
| H  | -31.6367050 | -58.6495314 | 3565.2521224 |    |             |             |              |
| H  | -30.8569978 | -54.5000598 | 3569.2684291 |    |             |             |              |
| Zn | -35.0456188 | -52.9881926 | 3568.3599408 |    |             |             |              |
| Br | -34.9257760 | -51.4344852 | 3570.0694456 |    |             |             |              |
| C  | -30.2477226 | -49.5418648 | 3564.8604612 |    |             |             |              |
| C  | -33.8406167 | -51.3551701 | 3566.5071797 |    |             |             |              |
| C  | -30.9578092 | -50.4849918 | 3564.0984625 |    |             |             |              |
| C  | -31.8782092 | -49.7843664 | 3566.6486138 |    |             |             |              |
| C  | -32.5918590 | -50.7412071 | 3565.8976513 |    |             |             |              |
| C  | -30.7166887 | -49.1858028 | 3566.1355134 |    |             |             |              |
| C  | -32.1265952 | -51.0726828 | 3564.6077306 |    |             |             |              |
| O  | -33.6868051 | -52.7219710 | 3566.9125770 |    |             |             |              |
| H  | -29.3340198 | -49.0785140 | 3564.4572767 |    |             |             |              |
| H  | -32.2369297 | -49.5151744 | 3567.6550663 |    |             |             |              |
| H  | -30.6040992 | -50.7646523 | 3563.0940739 |    |             |             |              |
| H  | -30.1731139 | -48.4418814 | 3566.7380652 |    |             |             |              |
| H  | -32.6685530 | -51.8086246 | 3563.9941868 |    |             |             |              |

### 15r-ma

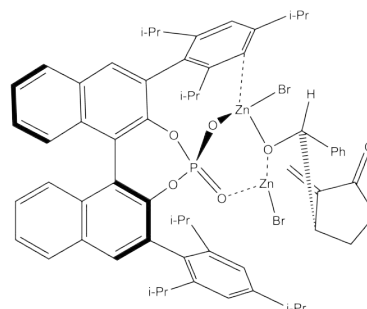

Energy (Hartree) = -11970.05407641

|   |             |             |              |
|---|-------------|-------------|--------------|
| C | -37.1852501 | -57.7294963 | 3568.2449225 |
| C | -36.5373319 | -58.8812495 | 3568.7153077 |
| C | -37.2218069 | -59.6732359 | 3569.7103915 |
| C | -36.5988948 | -60.7571276 | 3570.3997056 |
| C | -38.5823849 | -59.3380155 | 3570.0581134 |
| C | -39.2757218 | -60.1393282 | 3571.0142163 |
| C | -39.1975476 | -58.1923417 | 3569.4777739 |
| H | -40.2350132 | -57.9494450 | 3569.7526377 |
| C | -38.5109664 | -57.3470884 | 3568.6146904 |
| C | -32.8484977 | -58.4513270 | 3567.7186618 |
| C | -32.4971236 | -59.7425351 | 3567.3497871 |
| H | -31.4686502 | -59.9585501 | 3567.0227884 |
| C | -33.4619069 | -60.7923463 | 3567.3082605 |
| C | -33.1079567 | -62.0899137 | 3566.8311476 |
| C | -34.8350253 | -60.5280587 | 3567.6753587 |
| C | -35.7998710 | -61.5568129 | 3567.4616265 |
| C | -35.1756389 | -59.2326623 | 3568.2166596 |
| C | -34.1776199 | -58.2572711 | 3568.2165497 |
| O | -36.5505067 | -56.9073972 | 3567.3137613 |
| O | -34.4726726 | -57.0036017 | 3568.7402890 |
| P | -35.2995835 | -55.9640682 | 3567.7809853 |
| O | -35.6944334 | -54.8065477 | 3568.7136195 |
| O | -34.5702100 | -55.6036491 | 3566.4891660 |
| C | -38.6508413 | -61.2071732 | 3571.6392164 |
| C | -37.2951589 | -61.5045155 | 3571.3393424 |
| H | -40.3170512 | -59.8780843 | 3571.2595968 |
| H | -39.1955517 | -61.8119979 | 3572.3799425 |
| H | -35.5469955 | -60.9926078 | 3570.1879462 |
| H | -36.7881390 | -62.3305860 | 3571.8608655 |
| C | -35.4251579 | -62.8006145 | 3566.9723700 |
| C | -34.0659694 | -63.0793948 | 3566.6721660 |
| H | -36.8558980 | -61.3528285 | 3567.6850880 |
| H | -36.1905447 | -63.5750816 | 3566.8121017 |
| H | -33.7789223 | -64.0725515 | 3566.2947972 |
| H | -32.0559393 | -62.2834564 | 3566.5687087 |
| C | -39.2573861 | -54.9573640 | 3568.9752777 |
| C | -39.0979590 | -56.0691017 | 3568.0974786 |



|   |             |             |              |    |             |             |               |
|---|-------------|-------------|--------------|----|-------------|-------------|---------------|
| C | -39.8026297 | -53.7669981 | 3568.4599988 | H  | -32.4540494 | -57.7918464 | 3570.0446019  |
| C | -39.4665657 | -55.9538264 | 3566.7294745 | H  | -31.6457084 | -58.6722625 | 3565.2489101  |
| C | -40.0169004 | -54.7421758 | 3566.2707241 | H  | -30.8632558 | -54.5062872 | 3569.2573667  |
| C | -40.1936876 | -53.6331726 | 3567.1155066 | Zn | -35.0367288 | -52.9876343 | 3568.3781089  |
| H | -39.9042308 | -52.8928866 | 3569.1220001 | Br | -34.8886303 | -51.4329061 | 3570.0728654  |
| C | -39.3014475 | -57.1077027 | 3565.7418281 | C  | -30.2647965 | -49.4781264 | 3564.9212493  |
| H | -40.3047888 | -54.6628498 | 3565.2113520 | C  | -33.8473985 | -51.3566094 | 3566.5158642  |
| C | -38.3778425 | -56.7329151 | 3564.5679696 | C  | -30.9484174 | -50.4306165 | 3564.1474766  |
| H | -38.8064368 | -55.9121136 | 3563.9559348 | C  | -31.9098235 | -49.7597076 | 3566.6894349  |
| H | -38.2291418 | -57.6032988 | 3563.8959879 | C  | -32.5985634 | -50.7242973 | 3565.9251419  |
| H | -37.3820903 | -56.4093562 | 3564.9292143 | C  | -30.7539308 | -49.1376429 | 3566.1926169  |
| C | -40.6689378 | -57.6158556 | 3565.2486291 | C  | -32.1119833 | -51.0421444 | 3564.6398260  |
| H | -38.8220693 | -57.9504058 | 3566.2806665 | O  | -33.6845940 | -52.7232537 | 3566.9166978  |
| H | -41.2132794 | -56.8310491 | 3564.6830724 | H  | -29.3560458 | -48.9951904 | 3564.5300875  |
| H | -41.3130988 | -57.9237433 | 3566.0970310 | H  | -32.2852320 | -49.5048095 | 3567.6936399  |
| H | -40.5450850 | -58.4889108 | 3564.5748591 | H  | -30.5783785 | -50.6994010 | 3563.1460306  |
| C | -40.7985220 | -52.3207516 | 3566.6314428 | H  | -30.2308705 | -48.3867637 | 3566.8046063  |
| C | -40.4159088 | -51.9614328 | 3565.1886677 | H  | -32.6321883 | -51.7870323 | 3564.01078418 |
| H | -40.7710815 | -50.9412738 | 3564.9384997 | Br | -33.6501046 | -54.1139402 | 3563.4028103  |
| H | -40.8712574 | -52.6547514 | 3564.4504659 | Zn | -33.3067416 | -54.2672490 | 3565.7296744  |
| H | -39.3171458 | -51.9846912 | 3565.0427624 | H  | -34.6458336 | -49.0198055 | 3565.5840021  |
| C | -42.3287057 | -52.3389210 | 3566.8135062 | C  | -35.1022333 | -51.1999324 | 3565.5908617  |
| H | -40.3812382 | -51.5266338 | 3567.2866232 | C  | -35.4881974 | -49.7162274 | 3565.4049828  |
| H | -42.7757047 | -51.3652277 | 3566.5237258 | C  | -36.3216939 | -51.7381180 | 3566.2799940  |
| H | -42.6067923 | -52.5449855 | 3567.8666724 | C  | -36.7459304 | -53.0199279 | 3566.4051827  |
| H | -42.7913182 | -53.1287747 | 3566.1845216 | C  | -37.0830036 | -50.5717404 | 3566.8566098  |
| C | -38.8692907 | -55.0187664 | 3570.4530735 | O  | -36.5167175 | -49.4255884 | 3566.3757379  |
| C | -38.0608119 | -53.7973340 | 3570.9198123 | O  | -38.0415095 | -50.5840931 | 3567.5948132  |
| H | -37.7395875 | -53.9302817 | 3571.9730105 | H  | -35.8969068 | -49.5243007 | 3564.3907882  |
| H | -38.6485830 | -52.8577827 | 3570.8754489 | H  | -34.9022658 | -51.7209835 | 3564.6319922  |
| H | -37.1503759 | -53.6548303 | 3570.3103874 | H  | -34.0685955 | -50.7792733 | 3567.4442356  |
| C | -40.1213659 | -55.2080432 | 3571.3325645 | H  | -36.2302247 | -53.8426077 | 3565.8865049  |
| H | -38.2210608 | -55.9086577 | 3570.5914611 | H  | -37.6737260 | -53.2440447 | 3566.9573863  |
| H | -39.8412269 | -55.2995732 | 3572.4023490 |    |             |             |               |
| H | -40.6950771 | -56.1134076 | 3571.0502619 |    |             |             |               |
| H | -40.8051349 | -54.3390342 | 3571.2338653 |    |             |             |               |
| H | -30.7660198 | -52.7736895 | 3566.0458403 |    |             |             |               |
| H | -29.7333576 | -56.4527262 | 3570.6165266 |    |             |             |               |
| H | -31.3031867 | -58.0230049 | 3562.9279218 |    |             |             |               |
| C | -30.2139402 | -53.2844152 | 3566.8643468 |    |             |             |               |
| H | -32.6787395 | -56.3000943 | 3571.9716912 |    |             |             |               |
| H | -29.8210959 | -51.3709501 | 3567.8191606 |    |             |             |               |
| H | -33.5978921 | -58.5754037 | 3563.7697410 |    |             |             |               |
| C | -30.9032772 | -54.6219137 | 3567.1008231 |    |             |             |               |
| C | -30.4352784 | -57.3122223 | 3570.5883224 |    |             |             |               |
| C | -30.2401787 | -52.3594890 | 3568.0853059 |    |             |             |               |
| H | -29.6292328 | -52.7645686 | 3568.9190194 |    |             |             |               |
| C | -31.1303452 | -55.1226913 | 3568.3893025 |    |             |             |               |
| C | -31.2008770 | -57.2500285 | 3563.7155660 |    |             |             |               |
| H | -28.7413825 | -54.1361318 | 3565.4532326 |    |             |             |               |
| C | -31.2460669 | -55.4570724 | 3565.9988634 |    |             |             |               |
| C | -28.7717076 | -53.5081222 | 3566.3661202 |    |             |             |               |
| H | -28.2946142 | -52.5363581 | 3566.1258144 |    |             |             |               |
| H | -30.9433017 | -55.1360154 | 3564.9891744 |    |             |             |               |
| C | -32.4864152 | -55.8526035 | 3570.9757902 |    |             |             |               |
| H | -30.5242393 | -57.7107599 | 3571.6197447 |    |             |             |               |
| H | -29.9799682 | -58.0985195 | 3569.9529504 |    |             |             |               |
| C | -31.6765182 | -56.3992290 | 3568.6130244 |    |             |             |               |
| C | -33.5005390 | -57.8276916 | 3564.5826094 |    |             |             |               |
| C | -31.7626396 | -56.7710248 | 3566.1736736 |    |             |             |               |
| H | -30.1205345 | -57.1373020 | 3563.9399615 |    |             |             |               |
| H | -31.5753582 | -56.2991425 | 3563.2835792 |    |             |             |               |
| C | -31.8169721 | -56.8850026 | 3570.0523949 |    |             |             |               |
| C | -32.0244511 | -57.2192433 | 3567.5038372 |    |             |             |               |
| C | -32.0102692 | -57.6668999 | 3564.9535221 |    |             |             |               |
| H | -33.4553675 | -55.5074260 | 3570.5656820 |    |             |             |               |
| H | -34.1174371 | -58.1685025 | 3565.4341307 |    |             |             |               |
| H | -31.8457323 | -54.9615797 | 3571.1397378 |    |             |             |               |
| H | -31.2743253 | -52.2022451 | 3568.4509161 |    |             |             |               |
| H | -33.9238245 | -56.8702490 | 3564.2232774 |    |             |             |               |
| H | -28.1594679 | -54.0111402 | 3567.1435141 |    |             |             |               |

### 15r-mi; COSMO

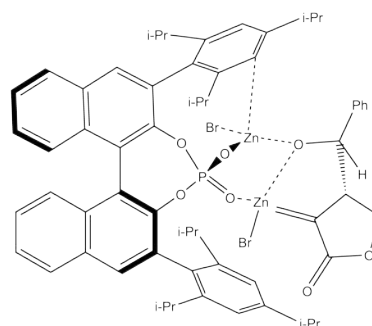

Energy (Hartree) = -11970.05877515

|    |            |            |             |
|----|------------|------------|-------------|
| C  | -1.0629555 | 10.3935978 | 235.6511825 |
| C  | 1.4719077  | 7.6859857  | 237.9132210 |
| C  | -0.2780034 | 9.4463246  | 234.9719309 |
| C  | -0.1880927 | 9.5816917  | 237.7707388 |
| C  | 0.6023625  | 8.6270135  | 237.0980932 |
| C  | -1.0141043 | 10.4618469 | 237.0536271 |
| C  | 0.5539619  | 8.5743424  | 235.6903605 |
| O  | 0.9102027  | 6.3622341  | 237.9842175 |
| H  | -1.7115537 | 11.0805824 | 235.0859966 |
| H  | -0.1515043 | 9.6275694  | 238.8712951 |
| H  | -0.3114204 | 9.3845960  | 233.8733651 |
| H  | -1.6236130 | 11.2028659 | 237.5934739 |
| H  | 1.1576843  | 7.8391067  | 235.1365393 |
| Br | 0.3568120  | 5.1347157  | 234.2972128 |
| Zn | 1.0041785  | 5.1387019  | 236.4959876 |
| H  | 4.3395353  | 9.0804684  | 236.5411294 |
| C  | 2.9491506  | 7.6169446  | 237.4345532 |
| C  | 3.5985428  | 9.0190652  | 237.3654828 |
| C  | 3.8306619  | 6.9417551  | 238.4580354 |
| C  | 4.0370731  | 5.6374861  | 238.7175178 |

|   |            |            |             |    |            |           |             |
|---|------------|------------|-------------|----|------------|-----------|-------------|
| C | 4.5210994  | 8.0174128  | 239.2364105 | H  | 0.4705878  | 4.1284322 | 242.2744037 |
| O | 4.2868465  | 9.2166642  | 238.6189220 | C  | -2.9100151 | 3.3732489 | 242.8534741 |
| O | 5.2044769  | 7.9243595  | 240.2353593 | H  | -1.1914787 | 2.2763169 | 242.1708068 |
| H | 2.8653804  | 9.8392751  | 237.2466503 | H  | -2.7804457 | 3.0753116 | 243.9141338 |
| C | 0.0053966  | 0.9715006  | 239.3104583 | H  | -3.6595507 | 2.6973912 | 242.3932865 |
| C | 0.8295664  | -0.1061937 | 239.6291138 | H  | -3.3318870 | 4.3999978 | 242.8387980 |
| C | 0.3884593  | -0.9795898 | 240.6919316 | H  | 7.5003608  | 5.9840477 | 237.1697655 |
| C | 1.2007805  | -2.0244024 | 241.2239692 | H  | 7.9022122  | 1.6661995 | 241.2399134 |
| C | -0.9222438 | -0.7699132 | 241.2674050 | H  | 4.6454562  | 1.1269925 | 233.8048328 |
| C | -1.3823442 | -1.6573319 | 242.2864057 | C  | 7.9378328  | 5.2790437 | 237.9121140 |
| C | -1.7122588 | 0.3514564  | 240.8693437 | H  | 5.0224689  | 1.8031978 | 242.5760688 |
| H | -2.6874984 | 0.5097332  | 241.3547355 | H  | 8.7594890  | 6.9393681 | 239.0639668 |
| C | -1.2447918 | 1.2700213  | 239.9386956 | H  | 3.2752230  | 3.3070767 | 234.1232032 |
| C | 4.2982908  | 0.6809862  | 238.1325457 | C  | 6.9733977  | 4.1020331 | 238.0045322 |
| C | 4.6623576  | -0.5617991 | 237.6302305 | C  | 7.1531743  | 0.8762153 | 241.0230423 |
| H | 5.6638323  | -0.6931934 | 237.1932216 | C  | 8.1213025  | 6.0474308 | 239.2285319 |
| C | 3.7654344  | -1.6681759 | 237.6421428 | H  | 8.6282884  | 5.4276899 | 239.9976141 |
| C | 4.1239703  | -2.9101274 | 237.0365089 | C  | 6.8284769  | 3.3339731 | 239.1706848 |
| C | 2.4613027  | -1.5253624 | 238.2450740 | C  | 5.2593853  | 1.3649031 | 234.6981635 |
| C | 1.5502605  | -2.6202047 | 238.1424020 | H  | 9.1757528  | 4.2945633 | 236.3757134 |
| C | 2.1148776  | -0.2781483 | 238.8878333 | C  | 6.2084084  | 3.7359492 | 236.8809701 |
| C | 3.0163849  | 0.7890573  | 238.7524506 | C  | 9.2949354  | 4.8044674 | 237.3531400 |
| O | 0.4101790  | 1.8293473  | 238.2962887 | H  | 9.9890039  | 5.6594920 | 237.2152143 |
| O | 2.7189408  | 2.0377897  | 239.3057617 | H  | 6.2957871  | 4.3475140 | 235.9692407 |
| P | 1.5362391  | 2.9585398  | 238.6619934 | C  | 5.1840781  | 2.3739328 | 241.6380876 |
| O | 1.1265079  | 3.9098042  | 239.7920091 | H  | 7.0138889  | 0.2866023 | 241.9526264 |
| O | 1.8787424  | 3.5572628  | 237.2845306 | H  | 7.5847256  | 0.2059765 | 240.2519096 |
| C | -0.5787158 | -2.6858804 | 242.7558190 | C  | 5.9575327  | 2.2289147 | 239.2350539 |
| C | 0.7295042  | -2.8566184 | 242.2307715 | C  | 4.0491794  | 3.5695840 | 234.8715209 |
| H | -2.3867381 | -1.4961554 | 242.7085630 | C  | 5.3251485  | 2.6415008 | 236.8892557 |
| H | -0.9451140 | -3.3576038 | 243.5468692 | H  | 5.5199770  | 0.4103849 | 235.1948775 |
| H | 2.2176620  | -2.1635970 | 240.8317674 | H  | 6.2042432  | 1.8322391 | 234.3496419 |
| H | 1.3785126  | -3.6520373 | 242.6276907 | C  | 5.8150408  | 1.4762407 | 240.5562957 |
| C | 1.9219202  | -3.8078799 | 237.5271769 | C  | 5.2147395  | 1.8678021 | 238.0798229 |
| C | 3.2249324  | -3.9644579 | 236.9839421 | C  | 4.5008704  | 2.3179644 | 235.6426694 |
| H | 0.5341145  | -2.5132261 | 238.5459980 | H  | 4.2059746  | 2.7711277 | 241.3019355 |
| H | 1.1966873  | -4.6327458 | 237.4550627 | H  | 3.6106467  | 4.3279697 | 235.5493316 |
| H | 3.5111694  | -4.9141776 | 236.5070711 | H  | 5.8396496  | 3.2366494 | 241.8794587 |
| H | 5.1278538  | -3.0071008 | 236.5941632 | H  | 7.1567914  | 6.3975645 | 239.6483691 |
| C | -1.7837406 | 3.6355652  | 240.6338399 | H  | 4.8881052  | 4.0495977 | 234.3264164 |
| C | -1.8175814 | 2.6202779  | 239.6363635 | H  | 9.7728298  | 4.0851146 | 238.0511723 |
| C | -1.9985255 | 4.9829160  | 240.2414145 | H  | 5.1221910  | 0.6263141 | 240.3880100 |
| C | -2.1545175 | 2.9587478  | 238.2932933 | H  | 3.5817677  | 1.7986113 | 235.9870641 |
| C | -2.3544573 | 4.3074513  | 237.9478366 | Zn | 0.3436389  | 5.7203089 | 239.7910148 |
| C | -2.2782558 | 5.3453065  | 238.8958555 | Br | 0.4636293  | 7.4743005 | 241.3385080 |
| H | -2.0527780 | 5.7595769  | 241.0218740 | H  | 7.3971716  | 3.6094759 | 240.0716597 |
| C | -2.3747834 | 1.8824289  | 237.2347516 | H  | 3.5867353  | 4.8413399 | 238.1125380 |
| H | -2.6020938 | 4.5515254  | 236.9058775 | H  | 4.7069454  | 5.3450158 | 239.5406607 |
| C | -1.6880489 | 2.1817363  | 235.8940422 | H  | 2.9880634  | 7.1133014 | 236.4422774 |
| H | -2.1168301 | 3.0708075  | 235.3880723 | H  | 1.4889943  | 8.0798165 | 238.9529140 |
| H | -1.8112840 | 1.3239138  | 235.2025361 |    |            |           |             |
| H | -0.6028551 | 2.3566148  | 236.0261760 |    |            |           |             |
| C | -3.8904343 | 1.6563665  | 237.0543343 |    |            |           |             |
| H | -1.9515715 | 0.9345650  | 237.6249236 |    |            |           |             |
| H | -4.3856025 | 2.5713172  | 236.6671144 |    |            |           |             |
| H | -4.3772424 | 1.3885284  | 238.0139092 |    |            |           |             |
| H | -4.0769993 | 0.8361632  | 236.3311095 |    |            |           |             |
| C | -2.5811013 | 6.7975791  | 238.5353500 |    |            |           |             |
| C | -2.5802925 | 7.0700763  | 237.0287095 |    |            |           |             |
| H | -2.6746732 | 8.1561442  | 236.8378848 |    |            |           |             |
| H | -3.4286935 | 6.5658216  | 236.5210203 |    |            |           |             |
| H | -1.6409059 | 6.7350809  | 236.5468625 |    |            |           |             |
| C | -3.9121879 | 7.2410353  | 239.1756712 |    |            |           |             |
| H | -1.7771867 | 7.4183655  | 238.9937850 |    |            |           |             |
| H | -4.1045107 | 8.3111855  | 238.9578359 |    |            |           |             |
| H | -3.9057706 | 7.1145272  | 240.2765186 |    |            |           |             |
| H | -4.7587375 | 6.6496602  | 238.7684396 |    |            |           |             |
| C | -1.5602990 | 3.3182611  | 242.1091749 |    |            |           |             |
| C | -0.5053982 | 4.1972426  | 242.7950412 |    |            |           |             |
| H | -0.3552523 | 3.8562331  | 243.8394910 |    |            |           |             |
| H | -0.7954773 | 5.2662139  | 242.8363108 |    |            |           |             |

### 15r-mi

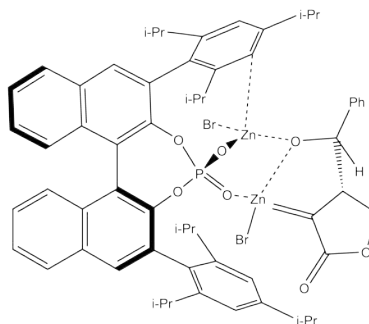

Energy (Hartree) = -11970.0471623199

|   |            |            |             |
|---|------------|------------|-------------|
| C | -1.1693159 | 10.4346098 | 235.7981952 |
| C | 1.4681573  | 7.6935762  | 237.8981124 |
| C | -0.4211300 | 9.4949900  | 235.0694122 |
| C | -0.2026382 | 9.5853160  | 237.8624546 |
| C | 0.5544962  | 8.6407685  | 237.1391270 |

|    |            |            |             |    |            |           |             |
|----|------------|------------|-------------|----|------------|-----------|-------------|
| C  | -1.0578367 | 10.4783784 | 237.1975824 | H  | -4.0481148 | 0.8369746 | 236.2714871 |
| C  | 0.4382934  | 8.6081605  | 235.7346426 | C  | -2.5985155 | 6.7907707 | 238.5416991 |
| O  | 0.9222951  | 6.3632831  | 237.9731481 | C  | -2.6143852 | 7.0664853 | 237.0359988 |
| H  | -1.8394198 | 11.1334295 | 235.2741861 | H  | -2.7008607 | 8.1536848 | 236.8480056 |
| H  | -0.1166655 | 9.6103472  | 238.9609641 | H  | -3.4741622 | 6.5716051 | 236.5379364 |
| H  | -0.5065626 | 9.4486289  | 233.9729985 | H  | -1.6852923 | 6.7239092 | 236.5400720 |
| H  | -1.6399420 | 11.2118278 | 237.7765769 | C  | -3.9157619 | 7.2479316 | 239.1997265 |
| H  | 1.0061322  | 7.8737208  | 235.1429843 | H  | -1.7834471 | 7.4039655 | 238.9905650 |
| Br | 0.4178073  | 5.1662287  | 234.2793818 | H  | -4.1001288 | 8.3199299 | 238.9842451 |
| Zn | 1.0267953  | 5.1382909  | 236.4847187 | H  | -3.8959587 | 7.1228288 | 240.3004459 |
| H  | 4.2178667  | 9.1216631  | 236.3436911 | H  | -4.7745988 | 6.6655907 | 238.8053680 |
| C  | 2.9205346  | 7.6428979  | 237.3471201 | C  | -1.5844493 | 3.2989042 | 242.1002214 |
| C  | 3.5525465  | 9.0523280  | 237.2309527 | C  | -0.4999350 | 4.1536904 | 242.7717257 |
| C  | 3.8633732  | 6.9812821  | 238.3239361 | H  | -0.3511842 | 3.8184853 | 243.8183075 |
| C  | 4.0642529  | 5.6816644  | 238.6092081 | H  | -0.7576182 | 5.2312499 | 242.8049552 |
| C  | 4.6214290  | 8.0645221  | 239.0302185 | H  | 0.4692723  | 4.0523395 | 242.2443215 |
| O  | 4.3401883  | 9.2587669  | 238.4163489 | C  | -2.9247436 | 3.3895289 | 242.8571106 |
| O  | 5.3806920  | 7.9778652  | 239.9698432 | H  | -1.2414697 | 2.2482754 | 242.1628090 |
| H  | 2.8016475  | 9.8634210  | 237.1707204 | H  | -2.7938100 | 3.0924095 | 243.9178624 |
| C  | -0.0018420 | 0.9669009  | 239.3044284 | H  | -3.6953565 | 2.7313362 | 242.4059936 |
| C  | 0.8231278  | -0.1085076 | 239.6292644 | H  | -3.3228507 | 4.4256631 | 242.8439504 |
| C  | 0.3756186  | -0.9851290 | 240.6866146 | H  | 7.6030638  | 5.9287309 | 237.1651143 |
| C  | 1.1870735  | -2.0273337 | 241.2245695 | H  | 7.8769213  | 1.6677308 | 241.2972644 |
| C  | -0.9414539 | -0.7827358 | 241.2494574 | H  | 4.6646880  | 1.1293613 | 233.8226875 |
| C  | -1.4068613 | -1.6746280 | 242.2615189 | C  | 8.0176330  | 5.2221342 | 237.9192043 |
| C  | -1.7314892 | 0.3360223  | 240.8452562 | H  | 4.9884385  | 1.8618594 | 242.6041135 |
| H  | -2.7119400 | 0.4911612  | 241.3213866 | H  | 8.8856171  | 6.8709777 | 239.0522888 |
| C  | -1.2589622 | 1.2591284  | 239.9217899 | H  | 3.3015180  | 3.3183479 | 234.1520096 |
| C  | 4.3010647  | 0.6887826  | 238.1602891 | C  | 7.0218313  | 4.0723199 | 238.0213111 |
| C  | 4.6714666  | -0.5538938 | 237.6624376 | C  | 7.1188023  | 0.8864367 | 241.0812097 |
| H  | 5.6772635  | -0.6806414 | 237.2339647 | C  | 8.2155821  | 6.0044467 | 239.2249550 |
| C  | 3.7784791  | -1.6628474 | 237.6673491 | H  | 8.6959462  | 5.3804257 | 240.0076051 |
| C  | 4.1445986  | -2.9041800 | 237.0660823 | C  | 6.8498076  | 3.3240831 | 239.1963696 |
| C  | 2.4695067  | -1.5228108 | 238.2595813 | C  | 5.2777476  | 1.3578609 | 234.7189676 |
| C  | 1.5625819  | -2.6201822 | 238.1503378 | H  | 9.2342639  | 4.1792261 | 236.4033694 |
| C  | 2.1148945  | -0.2760643 | 238.8986527 | C  | 6.2558998  | 3.7089752 | 236.8979205 |
| C  | 3.0140103  | 0.7943432  | 238.7697763 | C  | 9.3629402  | 4.7012986 | 237.3730468 |
| O  | 0.4070173  | 1.8260870  | 238.2945939 | H  | 10.0817675 | 5.5339234 | 237.2257722 |
| O  | 2.7080408  | 2.0423229  | 239.3188906 | H  | 6.3611550  | 4.3077486 | 235.9795251 |
| P  | 1.5291545  | 2.9592320  | 238.6616815 | C  | 5.1646992  | 2.4182301 | 241.6602002 |
| O  | 1.1078940  | 3.9156607  | 239.7827303 | H  | 6.9633292  | 0.3085758 | 242.0155561 |
| O  | 1.8802933  | 3.5497163  | 237.2834282 | H  | 7.5491814  | 0.2029681 | 240.3213601 |
| C  | -0.6038784 | -2.7003879 | 242.7365714 | C  | 5.9592752  | 2.2354145 | 239.2668549 |
| C  | 0.7097044  | -2.8638884 | 242.2242624 | C  | 4.0818967  | 3.5706965 | 234.8970108 |
| H  | -2.4160773 | -1.5188250 | 242.6741442 | C  | 5.3515731  | 2.6323100 | 236.9123405 |
| H  | -0.9752665 | -3.3753979 | 243.5224102 | H  | 5.5268751  | 0.3985912 | 235.2123022 |
| H  | 2.2079460  | -2.1603459 | 240.8409453 | H  | 6.2286479  | 1.8162889 | 234.3753969 |
| H  | 1.3584278  | -3.6572344 | 242.6256250 | C  | 5.7938696  | 1.4998956 | 240.5950579 |
| C  | 1.9424324  | -3.8072297 | 237.5399114 | C  | 5.2212347  | 1.8725693 | 238.1093995 |
| C  | 3.2496062  | -3.9608936 | 237.0074335 | C  | 4.5260300  | 2.3142365 | 235.6650527 |
| H  | 0.5432385  | -2.5147444 | 238.5459192 | H  | 4.1941670  | 2.8228595 | 241.3117522 |
| H  | 1.2199464  | -4.6339978 | 237.4629270 | H  | 3.6549632  | 4.3323234 | 235.5783966 |
| H  | 3.5424013  | -4.9101157 | 236.5337127 | H  | 5.8276883  | 3.2765078 | 241.8963841 |
| H  | 5.1520687  | -2.9984728 | 236.6313976 | H  | 7.2611919  | 6.3976289 | 239.6289759 |
| C  | -1.8105867 | 3.6180882  | 240.6249713 | H  | 4.9224743  | 4.0438149 | 234.3483192 |
| C  | -1.8343998 | 2.6083483  | 239.6212964 | H  | 9.8174032  | 3.9792654 | 238.0836082 |
| C  | -2.0299926 | 4.9651261  | 240.2394841 | H  | 5.0910351  | 0.6575403 | 240.4295080 |
| C  | -2.1617923 | 2.9539989  | 238.2778009 | H  | 3.6032663  | 1.8007319 | 236.0081382 |
| C  | -2.3673313 | 4.3035440  | 237.9408316 | Zn | 0.3532549  | 5.7355309 | 239.7804892 |
| C  | -2.3016915 | 5.3356193  | 238.8960772 | Br | 0.3891616  | 7.4856448 | 241.3223198 |
| H  | -2.0744943 | 5.7395605  | 241.0222987 | H  | 7.4157455  | 3.6013147 | 240.0984178 |
| C  | -2.3631699 | 1.8853421  | 237.2071621 | H  | 3.5588145  | 4.8746466 | 238.0655208 |
| H  | -2.6067051 | 4.5537142  | 236.8984141 | H  | 4.7844962  | 5.4040930 | 239.3942352 |
| C  | -1.6604952 | 2.2004518  | 235.8781165 | H  | 2.9100915  | 7.1342440 | 236.3555218 |
| H  | -2.0847957 | 3.0928708  | 235.3743610 | H  | 1.5326272  | 8.0719855 | 238.9419492 |
| H  | -1.7708920 | 1.3498981  | 235.1755926 |    |            |           |             |
| H  | -0.5776400 | 2.3771738  | 236.0246499 |    |            |           |             |
| C  | -3.8745291 | 1.6510968  | 237.0047829 |    |            |           |             |
| H  | -1.9388129 | 0.9367779  | 237.5947071 |    |            |           |             |
| H  | -4.3710830 | 2.5662753  | 236.6201093 |    |            |           |             |
| H  | -4.3724774 | 1.3718461  | 237.9552434 |    |            |           |             |

15r-2-ma; COSMO

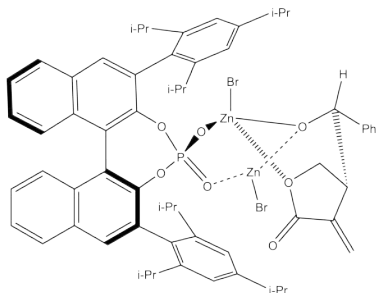

Energy (Hartree) = -11970.05059381

|   |            |            |            |
|---|------------|------------|------------|
| C | 1.2045127  | 2.3848675  | 1.7704089  |
| C | 2.6051206  | 2.3727167  | 1.7462722  |
| C | 3.2998284  | 3.6402917  | 1.8175903  |
| C | 4.7063763  | 3.7745765  | 1.6076661  |
| C | 2.5403874  | 4.8388148  | 2.0753916  |
| C | 3.2184991  | 6.0880378  | 2.2080801  |
| C | 1.1200174  | 4.7697382  | 2.1083629  |
| H | 0.5485434  | 5.7001079  | 2.2458794  |
| C | 0.4330991  | 3.5838690  | 1.8800511  |
| C | 3.7551553  | -0.9267463 | 0.1601885  |
| C | 4.9338510  | -1.1594800 | 0.8599166  |
| H | 5.5787649  | -2.0018898 | 0.5673206  |
| C | 5.2960815  | -0.3849257 | 1.9988700  |
| C | 6.4376425  | -0.7204658 | 2.7880862  |
| C | 4.4652875  | 0.7247605  | 2.3986515  |
| C | 4.7751523  | 1.3976551  | 3.6181574  |
| C | 3.3513118  | 1.1002889  | 1.5600732  |
| C | 3.0036558  | 0.2387595  | 0.5147346  |
| O | 0.5030703  | 1.1723094  | 1.7271854  |
| O | 1.9044556  | 0.5486345  | -0.2861408 |
| P | 0.3927189  | 0.3548436  | 0.3138418  |
| O | -0.5227194 | 1.0509733  | -0.7089019 |
| O | 0.0834772  | -1.1100437 | 0.6523886  |
| C | 4.5925034  | 6.1733952  | 2.0442483  |
| C | 5.3353038  | 5.0073341  | 1.7187211  |
| H | 2.6213061  | 6.9887974  | 2.4203590  |
| H | 5.1043788  | 7.1429595  | 2.1410739  |
| H | 5.2989522  | 2.8892016  | 1.3424958  |
| H | 6.4198777  | 5.0804693  | 1.5455162  |
| C | 5.8768418  | 1.0291853  | 4.3785435  |
| C | 6.7280211  | -0.0257756 | 3.9529054  |
| H | 4.1223178  | 2.2133645  | 3.9592553  |
| H | 6.0893325  | 1.5566943  | 5.3209533  |
| H | 7.6048846  | -0.3017429 | 4.5582461  |
| H | 7.0716671  | -1.5607529 | 2.4640614  |
| C | -1.5086058 | 3.9330682  | 0.3312589  |
| C | -1.0421362 | 3.5731640  | 1.6297768  |
| C | -2.8893515 | 3.8640654  | 0.0789119  |
| C | -1.9541670 | 3.1993260  | 2.6468462  |
| C | -3.3302939 | 3.1830480  | 2.3506878  |
| C | -3.8182355 | 3.4944859  | 1.0714788  |
| H | -3.2603214 | 4.1046948  | -0.9298042 |
| C | -1.4491871 | 2.8946033  | 4.0556836  |
| H | -4.0337146 | 2.8905933  | 3.1416861  |
| C | -2.2825718 | 1.8523076  | 4.8141748  |
| H | -3.2971002 | 2.2314751  | 5.0593968  |
| H | -1.7924324 | 1.6011497  | 5.7770569  |
| H | -2.3909419 | 0.9242049  | 4.2217999  |
| C | -1.3311534 | 4.1997950  | 4.8687664  |
| H | -0.4257300 | 2.4759840  | 3.9478746  |
| H | -2.3274982 | 4.6748187  | 4.9893614  |
| H | -0.6665299 | 4.9332396  | 4.3700752  |
| H | -0.9217801 | 4.0001443  | 5.8810053  |
| C | -5.3018265 | 3.4570037  | 0.7155266  |
| C | -6.1781497 | 2.7304764  | 1.7425589  |
| H | -7.2149967 | 2.6259651  | 1.3636632  |

|    |            |            |            |
|----|------------|------------|------------|
| H  | -6.2343316 | 3.2917430  | 2.6988188  |
| H  | -5.7907567 | 1.7183000  | 1.9749895  |
| C  | -5.8405652 | 4.8789849  | 0.4592487  |
| H  | -5.3689862 | 2.9001753  | -0.2476490 |
| H  | -6.8992987 | 4.8496419  | 0.1275491  |
| H  | -5.2536452 | 5.4046746  | -0.3198808 |
| H  | -5.7883984 | 5.4870897  | 1.3868394  |
| C  | -0.5575163 | 4.4632177  | -0.7453171 |
| C  | -0.8608413 | 3.9811023  | -2.1707413 |
| H  | -0.0849505 | 4.3581554  | -2.8682651 |
| H  | -1.8397574 | 4.3470362  | -2.5421912 |
| H  | -0.8666785 | 2.8782536  | -2.2348094 |
| C  | -0.5398100 | 6.0059547  | -0.7091238 |
| H  | 0.4629841  | 4.1073070  | -0.4943019 |
| H  | 0.1908200  | 6.4085940  | -1.4411378 |
| H  | -0.2712637 | 6.3970052  | 0.2914184  |
| H  | -1.5411647 | 6.4105507  | -0.9670687 |
| H  | 0.2897860  | -4.9728734 | -3.0568074 |
| H  | 4.4660934  | -0.9852997 | -4.5226361 |
| H  | 3.3284957  | -5.5372069 | 2.1293652  |
| C  | 1.1645737  | -4.5715859 | -3.6172236 |
| H  | 2.8452022  | 1.6794282  | -3.7433135 |
| H  | 0.0790579  | -4.6703881 | -5.5113048 |
| H  | 2.4632528  | -3.3949468 | 3.0891215  |
| C  | 1.8554094  | -3.5947864 | -2.6717080 |
| C  | 4.7398540  | -0.3846425 | -3.6297989 |
| C  | 0.6463209  | -3.9311440 | -4.9098576 |
| H  | 1.4790055  | -3.5704516 | -5.5490841 |
| C  | 2.3193127  | -2.3356067 | -3.0765784 |
| C  | 2.9750132  | -5.2243308 | 1.1259673  |
| H  | 2.4382388  | -6.2691613 | -3.0152853 |
| C  | 2.0967566  | -3.9881435 | -1.3391535 |
| C  | 2.0900269  | -5.7630258 | -3.9375293 |
| H  | 1.5653135  | -6.5150875 | -4.5627717 |
| H  | 1.7352505  | -4.9744646 | -1.0174413 |
| C  | 2.4392854  | 0.6886902  | -3.4523822 |
| H  | 5.1657493  | 0.5763166  | -3.9862177 |
| H  | 5.5355739  | -0.9341418 | -3.0868465 |
| C  | 2.9820514  | -1.4654368 | -2.1882091 |
| C  | 2.1588615  | -3.0408387 | 2.0825992  |
| C  | 2.7723950  | -3.1753415 | -0.4142277 |
| H  | 3.6060848  | -5.7320674 | 0.3683564  |
| H  | 1.9350516  | -5.5948447 | 1.0161693  |
| C  | 3.5149577  | -1.0385691 | -2.7268350 |
| C  | 3.1932421  | -1.8764712 | -0.8462388 |
| C  | 3.0469305  | -3.6942258 | 1.0056595  |
| H  | 1.5582284  | 0.8583470  | -2.8033402 |
| H  | 2.2258167  | -1.9371764 | 2.0746818  |
| H  | 2.0948627  | 0.1910530  | -4.3830371 |
| H  | -0.0201042 | -3.0675204 | -4.7096487 |
| H  | 1.0959793  | -3.3099699 | 1.9277119  |
| H  | 2.9881749  | -5.4207776 | -4.4936024 |
| H  | 3.8689548  | 0.4625448  | -1.8652038 |
| H  | 4.0930250  | -3.4121673 | 1.2431024  |
| H  | 2.1714199  | -2.0097494 | -4.1162043 |
| Zn | -2.2847431 | 0.5687616  | -1.3398646 |
| Br | -3.5737337 | 1.4840507  | -3.0418956 |
| C  | -3.2713087 | -6.1024989 | -2.8517663 |
| C  | -3.6550944 | -2.0015526 | -1.4527447 |
| C  | -4.1684727 | -5.8188311 | -1.8124088 |
| C  | -2.6455939 | -3.7534264 | -2.9327035 |
| C  | -3.5447398 | -3.4558754 | -1.8853173 |
| C  | -2.5147477 | -5.0618789 | -3.4158038 |
| C  | -4.3087826 | -4.5045862 | -1.3386681 |
| O  | -2.3484480 | -1.4389268 | -1.2120467 |
| H  | -3.1632013 | -7.1317887 | -3.2263728 |
| H  | -2.0447138 | -2.9395564 | -3.3674524 |
| H  | -4.7656821 | -6.6257537 | -1.3609747 |
| H  | -1.8221992 | -5.2709804 | -4.2441106 |
| H  | -5.0263748 | -4.3137233 | -0.5281946 |
| Br | -1.0037018 | -4.7161120 | 0.4377641  |

|    |            |            |            |
|----|------------|------------|------------|
| Zn | -1.0863679 | -2.4741713 | -0.1196792 |
| H  | -5.1326472 | 0.2367439  | -1.1540210 |
| C  | -4.5942385 | -1.7300215 | -0.2344789 |
| C  | -4.9784854 | -0.2455010 | -0.1705968 |
| C  | -3.8390881 | -1.8591319 | 1.0690486  |
| C  | -3.5795708 | -2.9235166 | 1.8566996  |
| C  | -3.2576701 | -0.5147615 | 1.3563091  |
| O  | -3.8176778 | 0.3957835  | 0.4498665  |
| O  | -2.4083836 | -0.1819567 | 2.1467326  |
| H  | -5.8578982 | -0.0643034 | 0.4792861  |
| H  | -3.9520734 | -3.9310301 | 1.6256056  |
| H  | -2.9709596 | -2.7909738 | 2.7657769  |
| H  | -4.0820375 | -1.4385014 | -2.3164579 |
| H  | -5.4987554 | -2.3618665 | -0.2948919 |

### 15r-2-ma

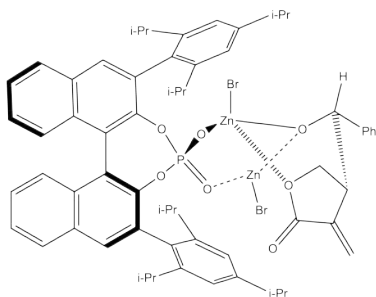

Energy (Hartree) = -11970.03963481

|   |            |            |            |
|---|------------|------------|------------|
| C | 1.2072439  | 2.3915559  | 1.7670688  |
| C | 2.6077466  | 2.3790090  | 1.7394617  |
| C | 3.3029155  | 3.6466116  | 1.8012560  |
| C | 4.7090756  | 3.7786770  | 1.5890870  |
| C | 2.5444014  | 4.8471795  | 2.0513690  |
| C | 3.2236608  | 6.0962939  | 2.1735324  |
| C | 1.1243825  | 4.7782863  | 2.0879921  |
| H | 0.5521495  | 5.7090846  | 2.2194026  |
| C | 0.4362731  | 3.5912698  | 1.8707502  |
| C | 3.7464580  | -0.9322648 | 0.1704693  |
| C | 4.9247825  | -1.1645054 | 0.8706148  |
| H | 5.5652661  | -2.0113853 | 0.5810472  |
| C | 5.2925289  | -0.3839375 | 2.0032408  |
| C | 6.4345332  | -0.7166163 | 2.7921775  |
| C | 4.4664911  | 0.7313298  | 2.3966905  |
| C | 4.7819268  | 1.4122037  | 3.6100278  |
| C | 3.3519400  | 1.1047071  | 1.5582884  |
| C | 2.9998777  | 0.2381944  | 0.5185751  |
| O | 0.5054353  | 1.1796936  | 1.7315126  |
| O | 1.9012682  | 0.5473678  | -0.2832067 |
| P | 0.3900968  | 0.3608977  | 0.3208433  |
| O | -0.5252790 | 1.0594211  | -0.7009860 |
| O | 0.0753273  | -1.1025658 | 0.6586023  |
| C | 4.5970102  | 6.1798990  | 2.0079397  |
| C | 5.3385618  | 5.0114411  | 1.6909014  |
| H | 2.6270604  | 6.9989409  | 2.3793024  |
| H | 5.1092037  | 7.1499842  | 2.0969054  |
| H | 5.3000382  | 2.8904304  | 1.3303537  |
| H | 6.4230399  | 5.0823980  | 1.5165572  |
| C | 5.8844931  | 1.0465254  | 4.3696416  |
| C | 6.7306741  | -0.0141323 | 3.9501871  |
| H | 4.1322395  | 2.2326243  | 3.9453714  |
| H | 6.1013794  | 1.5810226  | 5.3070192  |
| H | 7.6083967  | -0.2883770 | 4.5549571  |
| H | 7.0648105  | -1.5615985 | 2.4730800  |
| C | -1.5149792 | 3.9336854  | 0.3316581  |
| C | -1.0399768 | 3.5770702  | 1.6278055  |
| C | -2.8968085 | 3.8586717  | 0.0873776  |

|   |            |            |            |
|---|------------|------------|------------|
| C | -1.9444974 | 3.2003600  | 2.6505254  |
| C | -3.3220001 | 3.1793882  | 2.3625408  |
| C | -3.8182519 | 3.4882177  | 1.0862158  |
| H | -3.2746108 | 4.0963007  | -0.9194881 |
| C | -1.4303100 | 2.8994861  | 4.0568677  |
| H | -4.0193196 | 2.8862519  | 3.1586056  |
| C | -2.2550055 | 1.8551850  | 4.8217015  |
| H | -3.2698935 | 2.2300492  | 5.0721222  |
| H | -1.7590556 | 1.6085944  | 5.7826895  |
| H | -2.3607078 | 0.9247382  | 4.2329162  |
| C | -1.3117092 | 4.2068767  | 4.8660129  |
| H | -0.4065587 | 2.4833158  | 3.9438193  |
| H | -2.3081111 | 4.6807012  | 4.9893678  |
| H | -0.6506259 | 4.9403119  | 4.3629014  |
| H | -0.8977685 | 4.0111296  | 5.8770943  |
| C | -5.3038804 | 3.4495407  | 0.7393480  |
| C | -6.1728820 | 2.7206885  | 1.7709736  |
| H | -7.2121911 | 2.6140782  | 1.3992390  |
| H | -6.2252223 | 3.2813557  | 2.7276895  |
| H | -5.7809476 | 1.7099628  | 2.0020430  |
| C | -5.8456246 | 4.8713881  | 0.4899512  |
| H | -5.3766720 | 2.8949685  | -0.2247931 |
| H | -6.9065177 | 4.8430987  | 0.1651515  |
| H | -5.2639754 | 5.3989464  | -0.2915133 |
| H | -5.7866176 | 5.4779015  | 1.4179381  |
| C | -0.5734401 | 4.4679984  | -0.7511776 |
| C | -0.8787171 | 3.9790169  | -2.1738775 |
| H | -0.1117625 | 4.3637580  | -2.8768762 |
| H | -1.8639076 | 4.3305491  | -2.5421747 |
| H | -0.8703349 | 2.8761709  | -2.2370379 |
| C | -0.5701119 | 6.0108298  | -0.7194844 |
| H | 0.4514624  | 4.1225626  | -0.5036787 |
| H | 0.1537655  | 6.4186727  | -1.4551621 |
| H | -0.3018529 | 6.4073926  | 0.2788959  |
| H | -1.5760313 | 6.4057568  | -0.9739168 |
| H | 0.2944546  | -4.9867023 | -3.0586069 |
| H | 4.4760655  | -1.0081550 | -4.5070835 |
| H | 3.2980919  | -5.5348286 | 2.1563201  |
| C | 1.1807024  | -4.5943151 | -3.6075101 |
| H | 2.8533810  | 1.6611703  | -3.7443438 |
| H | 0.1350484  | -4.7089711 | -5.5238191 |
| H | 2.4280784  | -3.3881166 | 3.1041539  |
| C | 1.8601594  | -3.6106766 | -2.6604748 |
| C | 4.7458676  | -0.4044235 | -3.6152636 |
| C | 0.6881990  | -3.9647155 | -4.9153216 |
| H | 1.5331522  | -3.6079631 | -5.5404092 |
| C | 2.3250774  | -2.3526642 | -3.0668109 |
| C | 2.9504604  | -5.2245238 | 1.1501785  |
| H | 2.4385827  | -6.2898137 | -2.9686146 |
| C | 2.0906062  | -3.9975793 | -1.3243776 |
| C | 2.1069332  | -5.7918762 | -3.9010760 |
| H | 1.5909065  | -6.5489108 | -4.5275641 |
| H | 1.7264626  | -4.9821164 | -1.0005909 |
| C | 2.4455699  | 0.6722671  | -3.4502426 |
| H | 5.1747827  | 0.5544044  | -3.9736113 |
| H | 5.5382635  | -0.9534307 | -3.0673704 |
| C | 2.9811491  | -1.4786551 | -2.1776166 |
| C | 2.1296248  | -3.0380280 | 2.0946227  |
| C | 2.7597061  | -3.1811520 | -0.3982009 |
| H | 3.5848577  | -5.7356556 | 0.3977184  |
| H | 1.9105738  | -5.5940819 | 1.0374773  |
| C | 3.5175155  | -0.1540736 | -2.7184846 |
| C | 3.1841321  | -1.8845947 | -0.8330828 |
| C | 3.0242282  | -3.6949069 | 1.0254532  |
| H | 1.5630088  | 0.8467837  | -2.8047717 |
| H | 2.1954774  | -1.9344863 | 2.0845925  |
| H | 2.1021225  | 0.1722410  | -4.3799281 |
| H | 0.0166314  | -3.1005429 | -4.7362175 |
| H | 1.0679458  | -3.3094751 | 1.9360964  |
| H | 3.0158017  | -5.4583542 | -4.4445711 |
| H | 3.8686511  | 0.4494533  | -1.8574019 |

|    |            |            |            |
|----|------------|------------|------------|
| H  | 4.0688497  | -3.4119709 | 1.2688680  |
| H  | 2.1852881  | -2.0307704 | -4.1087460 |
| Zn | -2.2975390 | 0.5969932  | -1.3124842 |
| Br | -3.6176144 | 1.4912288  | -2.9949112 |
| C  | -3.2645625 | -6.0495962 | -2.9354971 |
| C  | -3.6563516 | -1.9789993 | -1.4531568 |
| C  | -4.1606023 | -5.7901765 | -1.8897450 |
| C  | -2.6456774 | -3.6982066 | -2.9688856 |
| C  | -3.5438269 | -3.4243953 | -1.9146772 |
| C  | -2.5122067 | -4.9956895 | -3.4788158 |
| C  | -4.3034971 | -4.4866617 | -1.3894016 |
| O  | -2.3545771 | -1.4170121 | -1.1992024 |
| H  | -3.1533002 | -7.0708126 | -3.3303254 |
| H  | -2.0468521 | -2.8739777 | -3.3865191 |
| H  | -4.7535006 | -6.6082102 | -1.4531597 |
| H  | -1.8192223 | -5.1845923 | -4.3112565 |
| H  | -5.0186769 | -4.3147553 | -0.5723976 |
| Br | -1.0218025 | -4.7133723 | 0.4026552  |
| Zn | -1.0812907 | -2.4664798 | -0.1262050 |
| H  | -5.1431647 | 0.2474533  | -1.1177286 |
| C  | -4.5991634 | -1.7336779 | -0.2398951 |
| C  | -4.9911203 | -0.2514105 | -0.1416552 |
| C  | -3.8456334 | -1.8818096 | 1.0713953  |
| C  | -3.5723558 | -2.9591850 | 1.8361426  |
| C  | -3.2729250 | -0.5387699 | 1.3841229  |
| O  | -3.8390421 | 0.3843726  | 0.4926061  |
| O  | -2.4289494 | -0.2159834 | 2.1827289  |
| H  | -5.8751473 | -0.0860149 | 0.5076764  |
| H  | -3.9285420 | -3.9674295 | 1.5844249  |
| H  | -2.9602025 | -2.8365531 | 2.7441396  |
| H  | -4.0841986 | -1.3999420 | -2.3064348 |
| H  | -5.4997176 | -2.3704887 | -0.3047067 |

### 15s-mi; COSMO

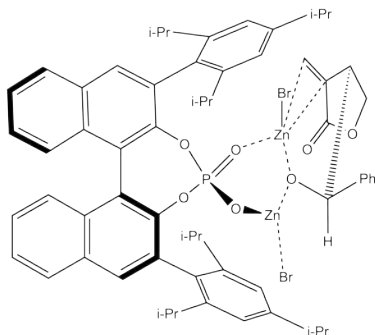

Energy (Hartree) = -11970.05616394

|    |            |            |             |
|----|------------|------------|-------------|
| Zn | 1.4384959  | 5.5774747  | 300.8635041 |
| Br | 2.3980993  | 6.8504165  | 302.5267817 |
| Zn | 1.2080591  | 5.3008311  | 297.4115734 |
| Br | -0.3909645 | 4.7137045  | 295.8459728 |
| C  | 0.0978351  | 1.0579585  | 299.5702111 |
| C  | 0.8695168  | -0.0642266 | 299.8913064 |
| C  | 0.3639943  | -0.9558987 | 300.9060101 |
| C  | 1.1424968  | -2.0240208 | 301.4442970 |
| C  | -0.9660583 | -0.7447283 | 301.4261455 |
| C  | -1.4715845 | -1.6319243 | 302.4233001 |
| C  | -1.7528325 | 0.3344672  | 300.9280178 |
| H  | -2.7952261 | 0.4346028  | 301.2675781 |
| C  | -1.2431121 | 1.2550260  | 300.0200717 |
| C  | 4.3481591  | 0.5184226  | 298.3493978 |
| C  | 4.5870305  | -0.7108291 | 297.7459182 |
| H  | 5.5314006  | -0.8663641 | 297.2018840 |
| C  | 3.6171017  | -1.7542505 | 297.7546514 |
| C  | 3.8516989  | -2.9793933 | 297.0601305 |
| C  | 2.3528122  | -1.5534130 | 298.4243471 |
| C  | 1.3561757  | -2.5681235 | 298.2997523 |

|   |            |            |             |
|---|------------|------------|-------------|
| C | 2.1388491  | -0.3245353 | 299.1533987 |
| C | 3.1262237  | 0.6590669  | 299.0710947 |
| O | 0.6229583  | 2.0214457  | 298.7033106 |
| O | 2.9478475  | 1.8534757  | 299.7703793 |
| P | 1.8458011  | 2.9463396  | 299.2915354 |
| O | 1.4339854  | 3.6647239  | 300.5955025 |
| O | 2.3337462  | 3.8288607  | 298.1346209 |
| C | -0.6941552 | -2.6705536 | 302.9140304 |
| C | 0.6272474  | -2.8582703 | 302.4269064 |
| H | -2.4917284 | -1.4677827 | 302.8045879 |
| H | -1.0939287 | -3.3432001 | 303.6880812 |
| H | 2.1688385  | -2.1732817 | 301.0798825 |
| H | 1.2500892  | -3.6687988 | 302.8351287 |
| C | 1.6099738  | -3.7406491 | 297.6008393 |
| C | 2.8731354  | -3.9593475 | 296.9892238 |
| H | 0.3695172  | -2.4118996 | 298.7564591 |
| H | 0.8215968  | -4.5040628 | 297.5157344 |
| H | 3.0654609  | -4.8964849 | 296.4449859 |
| H | 4.8247470  | -3.1227366 | 296.5645645 |
| C | -2.2847560 | 3.5778436  | 300.0787380 |
| C | -2.0838819 | 2.3395600  | 299.4147582 |
| C | -3.0825559 | 4.5586232  | 299.4584800 |
| C | -2.6771623 | 2.1073271  | 298.1428257 |
| C | -3.4636824 | 3.1206324  | 297.5666364 |
| C | -3.6804323 | 4.3541240  | 298.2032608 |
| H | -3.2499182 | 5.5227618  | 299.9652902 |
| C | -2.4590400 | 0.8022114  | 297.3780643 |
| H | -3.9124845 | 2.9411077  | 296.5774595 |
| C | -1.5266521 | 1.0144217  | 296.1701385 |
| H | -1.9884963 | 1.6941921  | 295.4240819 |
| H | -1.3140058 | 0.0475451  | 295.6680928 |
| H | -0.5663456 | 1.4716917  | 296.4779873 |
| C | -3.7852375 | 0.1430713  | 296.9610994 |
| H | -1.9514395 | 0.0931951  | 298.0636782 |
| H | -4.3428839 | 0.7644889  | 296.2297678 |
| H | -4.4468359 | -0.0248332 | 297.8353535 |
| H | -3.5950027 | -0.8385110 | 296.4800852 |
| C | -4.5640730 | 5.4291111  | 297.5826900 |
| C | -4.2102993 | 5.7218713  | 296.1153311 |
| H | -4.7965385 | 6.5850699  | 295.7376341 |
| H | -4.4434883 | 4.8565837  | 295.4605236 |
| H | -3.1313105 | 5.9448050  | 295.9950280 |
| C | -6.0534154 | 5.0662359  | 297.7376912 |
| H | -4.3865739 | 6.3604698  | 298.1660995 |
| H | -6.7031254 | 5.8707520  | 297.3343337 |
| H | -6.3219442 | 4.9053003  | 298.8013673 |
| H | -6.2890218 | 4.1316091  | 297.1863755 |
| C | -1.6695811 | 3.8482785  | 301.4486684 |
| C | -1.1669527 | 5.2940106  | 301.5928077 |
| H | -0.4821945 | 5.3970616  | 302.4620746 |
| H | -1.9818318 | 6.0271398  | 301.7644662 |
| H | -0.6876747 | 5.6412921  | 300.6453280 |
| C | -2.6465287 | 3.5089871  | 302.5895281 |
| H | -0.7872726 | 3.1844965  | 301.5473096 |
| H | -2.1808078 | 3.6974171  | 303.5790572 |
| H | -2.9509345 | 2.4448626  | 302.5541703 |
| H | -3.5664436 | 4.1261926  | 302.5177378 |
| H | 7.3692852  | 5.7928180  | 296.9135855 |
| H | 8.1102087  | 1.5947650  | 301.0856204 |
| H | 4.8784017  | 0.9012733  | 293.7772304 |
| C | 7.8900537  | 5.1346138  | 297.6428985 |
| H | 5.4119617  | 1.9816003  | 302.7485631 |
| H | 8.7574404  | 6.8710804  | 298.6411994 |
| H | 3.1017639  | 2.6438488  | 294.2421954 |
| C | 6.9573525  | 3.9515139  | 297.8756067 |
| C | 7.2909722  | 0.8485684  | 301.0181824 |
| C | 8.1710052  | 5.9659489  | 298.9004106 |
| H | 8.7640744  | 5.3991013  | 299.6488013 |
| C | 6.8397229  | 3.3035489  | 299.1161393 |
| C | 5.4661588  | 1.2777598  | 294.6401899 |
| H | 9.0091869  | 4.0988804  | 296.0523453 |

|   |            |            |             |
|---|------------|------------|-------------|
| C | 6.1996891  | 3.4510343  | 296.8016031 |
| C | 9.2031905  | 4.6570178  | 296.9905316 |
| H | 9.8637185  | 5.5160431  | 296.7490747 |
| H | 6.2587299  | 3.9721494  | 295.8336801 |
| C | 5.5127667  | 2.5055423  | 301.7756036 |
| H | 7.2313555  | 0.3243095  | 301.9947009 |
| H | 7.5766266  | 0.1060800  | 300.2454515 |
| C | 6.0051770  | 2.1848124  | 299.2994568 |
| C | 3.6748079  | 3.0174180  | 295.1159229 |
| C | 5.3456736  | 2.3426127  | 296.9290172 |
| H | 6.0563905  | 0.4320623  | 295.0489840 |
| H | 6.1857924  | 2.0309539  | 294.2563220 |
| C | 5.9489449  | 1.5219211  | 300.6744707 |
| C | 5.2631229  | 1.6907462  | 298.1938067 |
| C | 4.5408739  | 1.8902735  | 295.7086382 |
| H | 4.5355775  | 2.9684929  | 301.5342224 |
| H | 2.9477838  | 3.3858337  | 295.8641179 |
| H | 6.2534955  | 3.3205417  | 301.9136401 |
| H | 7.2287167  | 6.2939263  | 299.3819097 |
| H | 4.2835188  | 3.8814426  | 294.7799333 |
| H | 9.7579433  | 3.9804259  | 297.6747658 |
| H | 5.1872614  | 0.7166344  | 300.6322203 |
| H | 3.8443699  | 1.0928005  | 296.0370928 |
| H | 7.4147646  | 3.6768489  | 299.9768458 |
| C | -1.8409925 | 9.9683079  | 297.1748403 |
| C | 1.4643046  | 7.7659354  | 298.9680965 |
| C | -1.9808549 | 8.6061054  | 297.4778865 |
| C | 0.4358922  | 9.9073420  | 298.0325152 |
| C | 0.3087517  | 8.5332209  | 298.3291255 |
| C | -0.6280976 | 10.6191824 | 297.4603637 |
| C | -0.9165460 | 7.8939277  | 298.0565509 |
| O | 1.1804873  | 6.3781306  | 299.0843097 |
| H | -2.6748301 | 10.5243583 | 296.7199089 |
| H | 1.3753642  | 10.4376577 | 298.2560257 |
| H | -2.9245615 | 8.0845338  | 297.2599768 |
| H | -0.5084818 | 11.6900492 | 297.2348405 |
| H | -1.0409641 | 6.8270894  | 298.2929193 |
| C | 2.8185747  | 7.9531942  | 298.2343623 |
| C | 2.9481856  | 7.2378728  | 296.9142051 |
| C | 4.3583173  | 6.7139463  | 296.8224273 |
| O | 4.9620151  | 6.8991587  | 298.0261807 |
| C | 4.0281495  | 7.3853737  | 299.0127033 |
| O | 4.9233689  | 6.2479300  | 295.8565313 |
| C | 2.0646781  | 7.0884243  | 295.8924658 |
| H | 4.5462625  | 8.1336839  | 299.6399230 |
| H | 3.7321240  | 6.5306809  | 299.6560512 |
| H | 1.6085632  | 8.1766444  | 299.9968900 |
| H | 2.9856767  | 9.0370789  | 298.0570078 |
| H | 2.3808729  | 6.5447979  | 294.9869760 |
| H | 1.0708326  | 7.5613079  | 295.8973770 |

### 15s-mi

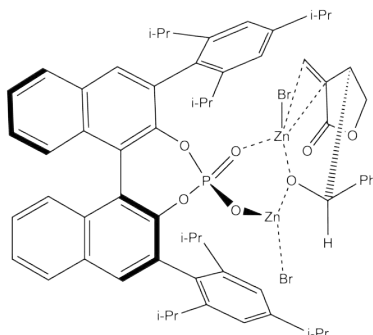

Energy (Hartree) = -11970.04492574

|    |            |           |             |
|----|------------|-----------|-------------|
| Zn | 1.4661188  | 5.5742540 | 300.8545452 |
| Br | 2.3930281  | 6.8783407 | 302.5020048 |
| Zn | 1.1970657  | 5.2808148 | 297.4086611 |
| Br | -0.3818514 | 4.7265054 | 295.8172897 |

|   |            |            |             |
|---|------------|------------|-------------|
| C | 0.0973201  | 1.0516029  | 299.5746358 |
| C | 0.8684402  | -0.0707384 | 299.8963148 |
| C | 0.3600237  | -0.9632768 | 300.9086454 |
| C | 1.1368175  | -2.0321385 | 301.4472262 |
| C | -0.9715024 | -0.7534450 | 301.4251064 |
| C | -1.4792162 | -1.6431117 | 302.4182729 |
| C | -1.7561653 | 0.3270731  | 300.9271598 |
| H | -2.7997226 | 0.4276534  | 301.2630665 |
| C | -1.2439801 | 1.2495835  | 300.0229767 |
| C | 4.3461345  | 0.5207120  | 298.3555898 |
| C | 4.5871270  | -0.7077028 | 297.7516509 |
| H | 5.5312197  | -0.8582895 | 297.2058338 |
| C | 3.6210924  | -1.7542433 | 297.7610967 |
| C | 3.8583446  | -2.9783775 | 297.0667095 |
| C | 2.3568473  | -1.5574521 | 298.4316848 |
| C | 1.3636887  | -2.5753391 | 298.3076423 |
| C | 2.1396881  | -0.3292896 | 299.1609823 |
| C | 3.1249527  | 0.6567511  | 299.0793982 |
| O | 0.6223988  | 2.0148272  | 298.7084257 |
| O | 2.9441983  | 1.8498869  | 299.7798566 |
| P | 1.8431490  | 2.9411389  | 299.2988769 |
| O | 1.4244293  | 3.6631827  | 300.5984047 |
| O | 2.3319144  | 3.8237658  | 298.1418176 |
| C | -0.7037188 | -2.6824989 | 302.9089397 |
| C | 0.6187143  | -2.8686761 | 302.4257263 |
| H | -2.5004077 | -1.4796951 | 302.7970557 |
| H | -1.1059749 | -3.3567695 | 303.6802078 |
| H | 2.1638640  | -2.1794743 | 301.0843737 |
| H | 1.2404878  | -3.6800026 | 302.8338298 |
| C | 1.6209289  | -3.7468963 | 297.6091985 |
| C | 2.8836697  | -3.9614704 | 296.9967095 |
| H | 0.3772985  | -2.4217178 | 298.7655830 |
| H | 0.8349848  | -4.5128632 | 297.5251293 |
| H | 3.0788487  | -4.8978766 | 296.4523491 |
| H | 4.8312693  | -3.1180246 | 296.5699183 |
| C | -2.2808527 | 3.5745778  | 300.0861764 |
| C | -2.0804091 | 2.3379630  | 299.4187613 |
| C | -3.0724268 | 4.5591288  | 299.4646723 |
| C | -2.6665919 | 2.1124030  | 298.1426131 |
| C | -3.4466872 | 3.1300023  | 297.5658420 |
| C | -3.6640880 | 4.3611199  | 298.2056953 |
| H | -3.2395192 | 5.5222910  | 299.9733891 |
| C | -2.4480021 | 0.8100954  | 297.3733483 |
| H | -3.8893869 | 2.9553387  | 296.5732076 |
| C | -1.5159106 | 1.0257319  | 296.1659568 |
| H | -1.9757204 | 1.7083820  | 295.4215148 |
| H | -1.3036729 | 0.0608120  | 295.6603063 |
| H | -0.5547579 | 1.4805316  | 296.4741888 |
| C | -3.7747870 | 0.1528871  | 296.9553587 |
| H | -1.9408967 | 0.0986533  | 298.0568194 |
| H | -4.3328103 | 0.7762927  | 296.2261277 |
| H | -4.4365616 | -0.0167602 | 297.8289437 |
| H | -3.5860678 | -0.8272015 | 296.4708957 |
| C | -4.5443149 | 5.4399846  | 297.5869769 |
| C | -4.2066169 | 5.7202888  | 296.1136206 |
| H | -4.7880385 | 6.5875848  | 295.7377807 |
| H | -4.4598622 | 4.8552225  | 295.4662324 |
| H | -3.1268988 | 5.9288080  | 295.9755772 |
| C | -6.0346862 | 5.0917255  | 297.7637914 |
| H | -4.3507762 | 6.3737175  | 298.1619079 |
| H | -6.6835553 | 5.8980741  | 297.3627973 |
| H | -6.2907776 | 4.9399342  | 298.8316592 |
| H | -6.2848669 | 4.1547053  | 297.2234201 |
| C | -1.6713350 | 3.8395250  | 301.4600437 |
| C | -1.1750850 | 5.2863045  | 301.6160114 |
| H | -0.4937249 | 5.3881095  | 302.4875908 |
| H | -1.9956451 | 6.0135998  | 301.7865473 |
| H | -0.6873433 | 5.6404216  | 300.6760847 |
| C | -2.6511318 | 3.4887226  | 302.5949395 |
| H | -0.7862593 | 3.1790473  | 301.5573941 |
| H | -2.1920781 | 3.6751621  | 303.5879904 |

|   |            |            |             |
|---|------------|------------|-------------|
| H | -2.9483382 | 2.4229865  | 302.5539453 |
| H | -3.5752537 | 4.0993714  | 302.5217462 |
| H | 7.3613876  | 5.7960487  | 296.9066203 |
| H | 8.1135813  | 1.6048195  | 301.0795642 |
| H | 4.8614005  | 0.8962337  | 293.7860340 |
| C | 7.8822018  | 5.1380796  | 297.6360509 |
| H | 5.4221714  | 1.9848252  | 302.7528260 |
| H | 8.7551264  | 6.8752269  | 298.6286383 |
| H | 3.0877231  | 2.6451959  | 294.2471928 |
| C | 6.9484054  | 3.9568657  | 297.8734507 |
| C | 7.2958399  | 0.8569936  | 301.0144325 |
| C | 8.1682653  | 5.9713884  | 298.8909354 |
| H | 8.7631238  | 5.4058618  | 299.6388769 |
| C | 6.8342047  | 3.3099796  | 299.1146017 |
| C | 5.4501403  | 1.2738502  | 294.6477191 |
| H | 8.9948946  | 4.0953662  | 296.0460912 |
| C | 6.1875340  | 3.4559755  | 296.8021487 |
| C | 9.1925693  | 4.6557971  | 296.9818856 |
| H | 9.8548161  | 5.5122572  | 296.7363321 |
| H | 6.2433053  | 3.9775158  | 295.8342981 |
| C | 5.5148364  | 2.5082371  | 301.7788630 |
| H | 7.2417686  | 0.3315148  | 301.9905848 |
| H | 7.5814480  | 0.1168429  | 300.2397332 |
| C | 6.0015579  | 2.1906767  | 299.3009102 |
| C | 3.6654957  | 3.0207876  | 295.1167452 |
| C | 5.3350561  | 2.3470158  | 296.9323938 |
| H | 6.0387284  | 0.4282503  | 295.0587474 |
| H | 6.1723258  | 2.0230605  | 294.2613584 |
| C | 5.9510218  | 1.5270499  | 300.6758019 |
| C | 5.2573576  | 1.6954650  | 298.1975337 |
| C | 4.5274407  | 1.8931610  | 295.7143812 |
| H | 4.5333039  | 2.9647520  | 301.5437412 |
| H | 2.9413460  | 3.3966956  | 295.8638931 |
| H | 6.2509441  | 3.3279190  | 301.9132251 |
| H | 7.2284552  | 6.3024370  | 299.3748925 |
| H | 4.2767975  | 3.8800829  | 294.7736097 |
| H | 9.7472527  | 3.9791144  | 297.6658185 |
| H | 5.1914320  | 0.7196048  | 300.6351741 |
| H | 3.8281106  | 1.0993281  | 296.0459077 |
| H | 7.4119883  | 3.6838923  | 299.9732014 |
| C | -1.8347877 | 9.9735095  | 297.1618720 |
| C | 1.4580522  | 7.7581259  | 298.9602090 |
| C | -1.9720496 | 8.6062558  | 297.4401270 |
| C | 0.4279755  | 9.9094138  | 298.0519570 |
| C | 0.3048436  | 8.5298060  | 298.3224555 |
| C | -0.6306865 | 10.6258602 | 297.4769542 |
| C | -0.9133973 | 7.8898265  | 298.0232544 |
| O | 1.1742160  | 6.3719112  | 299.0748725 |
| H | -2.6643139 | 10.5327973 | 296.7032172 |
| H | 1.3608121  | 10.4409387 | 298.3002420 |
| H | -2.9082368 | 8.0822388  | 297.1978738 |
| H | -0.5140284 | 11.7012421 | 297.2726909 |
| H | -1.0364141 | 6.8189384  | 298.2410101 |
| C | 2.8133490  | 7.9475198  | 298.2266729 |
| C | 2.9456786  | 7.2352884  | 296.9044888 |
| C | 4.3559934  | 6.7109720  | 296.8123632 |
| O | 4.9610891  | 6.9029956  | 298.0177135 |
| C | 4.0239657  | 7.3775643  | 299.0033101 |
| O | 4.9188574  | 6.2409359  | 295.8491970 |
| C | 2.0636089  | 7.0864449  | 295.8822769 |
| H | 4.5368250  | 8.1211338  | 299.6412750 |
| H | 3.7271397  | 6.5191595  | 299.6413846 |
| H | 1.6030926  | 8.1664407  | 299.9905569 |
| H | 2.9777266  | 9.0327373  | 298.0520854 |
| H | 2.3822185  | 6.5391072  | 294.9799125 |
| H | 1.0668341  | 7.5527462  | 295.8874417 |

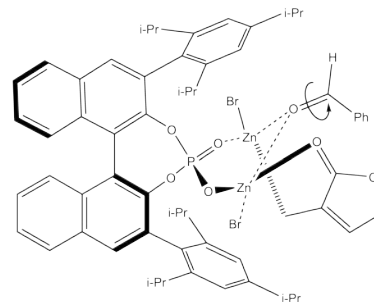

Energy(Hartree)= -11970.04020619

|   |            |            |            |
|---|------------|------------|------------|
| C | 0.9292203  | 2.2366900  | 1.5999716  |
| C | 2.3187298  | 2.2376999  | 1.7749717  |
| C | 2.9852441  | 3.5155389  | 1.8885394  |
| C | 4.4061574  | 3.6587754  | 1.8819838  |
| C | 2.1848884  | 4.7134545  | 1.9794536  |
| C | 2.8292750  | 5.9764291  | 2.1479674  |
| C | 0.7728360  | 4.6278472  | 1.8223481  |
| H | 0.1805760  | 5.5554082  | 1.8417450  |
| C | 0.1330145  | 3.4222405  | 1.5567327  |
| C | 3.6722179  | -1.1626284 | 0.5946274  |
| C | 4.6870972  | -1.3793145 | 1.5213003  |
| H | 5.3331273  | -2.2643335 | 1.4115080  |
| C | 4.8733627  | -0.5299454 | 2.6484414  |
| C | 5.8479080  | -0.8326965 | 3.6470724  |
| C | 4.0295078  | 0.6291384  | 2.8131880  |
| C | 4.1550083  | 1.3884621  | 4.0155761  |
| C | 3.0792762  | 0.9563663  | 1.7762405  |
| C | 2.8950792  | 0.0291706  | 0.7418089  |
| O | 0.2610577  | 1.0219137  | 1.4947267  |
| O | 1.9549153  | 0.2906470  | -0.2486664 |
| P | 0.3548382  | 0.1668103  | 0.0945831  |
| O | -0.3298171 | 0.9225802  | -1.0621393 |
| O | -0.0823694 | -1.2472214 | 0.4323552  |
| C | 4.2120878  | 6.0733323  | 2.1796577  |
| C | 5.0035333  | 4.9040269  | 2.0240561  |
| H | 2.2019617  | 6.8780986  | 2.2295546  |
| H | 4.6971610  | 7.0537540  | 2.3020866  |
| H | 5.0352370  | 2.7679085  | 1.7523658  |
| H | 6.1012680  | 4.9846442  | 2.0093641  |
| C | 5.0973181  | 1.0549175  | 4.9789489  |
| C | 5.9654241  | -0.0535465 | 4.7881833  |
| H | 3.4849772  | 2.2436131  | 4.1806171  |
| H | 5.1673113  | 1.6517538  | 5.9011911  |
| H | 6.7151632  | -0.3024723 | 5.5546600  |
| H | 6.4932681  | -1.7131860 | 3.5006975  |
| C | -1.6297866 | 3.9307056  | -0.1596416 |
| C | -1.2978989 | 3.3842325  | 1.1182306  |
| C | -2.9759236 | 3.9426985  | -0.5556578 |
| C | -2.3150304 | 2.8235983  | 1.9319278  |
| C | -3.6540479 | 2.8749128  | 1.4885592  |
| C | -4.0131321 | 3.4475391  | 0.2579001  |
| C | -2.0171310 | 2.2002526  | 3.2932350  |
| H | -4.4339612 | 2.4621919  | 2.1457112  |
| C | -2.4485433 | 0.7243020  | 3.3473082  |
| H | -3.5468275 | 0.6105897  | 3.2279168  |
| H | -2.1772303 | 0.2685342  | 4.3216969  |
| H | -1.9591587 | 0.1243782  | 2.5566206  |
| C | -2.6483427 | 3.0197814  | 4.4342338  |
| H | -0.9189380 | 2.2288378  | 3.4443339  |
| H | -3.7564716 | 3.0263773  | 4.3650698  |
| H | -2.3040716 | 4.0739131  | 4.4117329  |
| H | -2.3779436 | 2.5899317  | 5.4209627  |
| C | -5.4552097 | 3.5773233  | -0.2253846 |
| C | -6.4768378 | 2.8096293  | 0.6190600  |
| H | -7.4865598 | 2.8781011  | 0.1671982  |
| H | -6.5450489 | 3.2154294  | 1.6500940  |

## 7.2 Pathways from Complexes 14 to 15

### 7.2.1 Pathways starting from 14d-mi

#### 7.2.1.1 to 15d-mi

#### TS1-8-d; COSMO



|    |            |            |            |
|----|------------|------------|------------|
| H  | -6.2188298 | 1.7351233  | 0.7036114  |
| C  | -5.8633492 | 5.0611317  | -0.3295210 |
| H  | -5.4723356 | 3.1498828  | -1.2545060 |
| H  | -6.8849837 | 5.1615769  | -0.7509093 |
| H  | -5.1708974 | 5.6339325  | -0.9775384 |
| H  | -5.8571061 | 5.5382256  | 0.6731901  |
| C  | -0.5827409 | 4.5202091  | -1.1082564 |
| C  | -0.6543992 | 3.9300738  | -2.5270374 |
| H  | 0.1522142  | 4.3567498  | -3.1583371 |
| H  | -1.6203687 | 4.1455300  | -3.0274028 |
| H  | -0.5219415 | 2.8322799  | -2.5019489 |
| C  | -0.6890443 | 6.0570360  | -1.1522416 |
| H  | 0.4186154  | 4.2647191  | -0.7080948 |
| H  | 0.1017182  | 6.4885033  | -1.8004997 |
| H  | -0.5871447 | 6.5062843  | -0.1438708 |
| H  | -1.6718866 | 6.3747550  | -1.5595367 |
| H  | 1.7707661  | -5.9339967 | -3.0042776 |
| H  | 5.3461918  | -1.3044312 | -3.8646653 |
| H  | 3.6001689  | -5.3554844 | 2.7618073  |
| C  | 2.2557947  | -5.0840979 | -3.5334952 |
| H  | 3.4348921  | 1.2551365  | -3.5257374 |
| H  | 0.9489404  | -5.3274085 | -5.2761542 |
| H  | 1.1902818  | -4.5647588 | 2.7786144  |
| C  | 2.6248143  | -4.0580359 | -2.4690123 |
| C  | 5.3980775  | -0.6669312 | -2.9571158 |
| C  | 1.2450905  | -4.5368963 | -4.5560255 |
| H  | 1.6721803  | -3.6977052 | -5.1434524 |
| C  | 3.0881106  | -2.7769493 | -2.8148762 |
| C  | 3.6658149  | -5.0872666 | 1.6871050  |
| H  | 4.2274176  | -6.0611508 | -3.4991867 |
| C  | 2.5407491  | -4.3734952 | -1.1036405 |
| C  | 3.5167887  | -5.6279019 | -4.2316908 |
| H  | 3.2558652  | -6.4159357 | -4.9686276 |
| H  | 2.1753804  | -5.3735968 | -0.8173855 |
| C  | 3.0424663  | 0.2478971  | -3.2752459 |
| H  | 5.8270908  | 0.3119281  | -3.2565962 |
| H  | 6.1022195  | -1.1487336 | -2.2484238 |
| C  | 3.4500320  | -1.8232551 | -1.8482009 |
| C  | 1.2726620  | -4.2202686 | 1.7274690  |
| C  | 2.8851505  | -3.4576846 | -0.0903083 |
| H  | 4.7235546  | -4.8432487 | 1.4575855  |
| H  | 3.3986155  | -5.9909373 | 1.1002148  |
| C  | 4.0061898  | -0.4815718 | -2.3224312 |
| C  | 3.3426749  | -2.1612685 | -0.4684070 |
| C  | 2.7334378  | -3.9048506 | 1.3654527  |
| H  | 2.0436509  | 0.3728967  | -2.8141456 |
| H  | 0.6473962  | -3.3115229 | 1.6350165  |
| H  | 2.9153856  | -0.3032089 | -4.2304467 |
| H  | 0.3286617  | -4.1667553 | -4.0555992 |
| H  | 0.8397620  | -5.0125724 | 1.0817791  |
| H  | 4.0475870  | -4.8184200 | -4.7757431 |
| H  | 4.1445830  | 0.1657529  | -1.4340384 |
| H  | 3.0390523  | -3.0634291 | 2.0164379  |
| H  | 3.1790063  | -2.5085396 | -3.8792608 |
| Zn | -1.9001929 | 0.3800409  | -2.0351117 |
| Br | -3.6602997 | 1.4046798  | -3.1441972 |
| C  | -5.8191114 | -4.0428196 | 0.1466883  |
| C  | -4.8506956 | -3.0981753 | -0.1964464 |
| C  | -5.0909725 | -1.7208174 | 0.0454430  |
| C  | -6.3113038 | -1.3120662 | 0.6376051  |
| C  | -7.2695234 | -2.2645758 | 0.9965433  |
| C  | -7.0225406 | -3.6278462 | 0.7492217  |
| H  | -5.6362176 | -5.1107958 | -0.0427475 |
| C  | -4.1105059 | -0.7158829 | -0.3131933 |
| H  | -6.4958854 | -0.2423117 | 0.8193073  |
| H  | -8.2124733 | -1.9493713 | 1.4668259  |
| H  | -7.7793788 | -4.3775747 | 1.0272709  |
| O  | -2.9493601 | -0.9817301 | -0.7090841 |
| C  | -2.8982290 | -4.3242712 | -3.1235106 |
| C  | -1.8991835 | -3.6246488 | -2.4995939 |
| C  | -1.8771819 | -2.3031288 | -3.1645413 |

|    |            |            |            |
|----|------------|------------|------------|
| O  | -2.7909827 | -2.2335321 | -4.1462175 |
| C  | -3.5123328 | -3.4822486 | -4.1916452 |
| O  | -1.1574247 | -1.3300658 | -2.8788516 |
| C  | -1.0266654 | -3.8969588 | -1.3599094 |
| H  | -3.4130430 | -3.9009213 | -5.2175447 |
| H  | -4.5886081 | -3.2518241 | -4.0262630 |
| Zn | -1.4353413 | -2.7332003 | 0.2439011  |
| Br | -2.5083719 | -3.0219878 | 2.3213708  |
| H  | 0.0139297  | -3.5718504 | -1.5666090 |
| H  | -1.0354484 | -4.9632698 | -1.0636847 |
| H  | -3.9095658 | -3.4062825 | -0.6732470 |
| H  | -3.2296368 | -5.3467722 | -2.8970793 |
| H  | -4.4197260 | 0.3553864  | -0.2477949 |
| H  | -3.2330642 | 4.3519077  | -1.5449358 |

### TS1-8-d

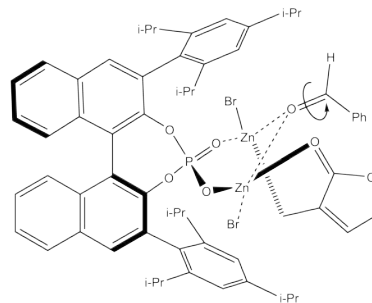

Energy(Hartree) = -11970.02640149  
 number of imaginary frequencies: 1

|   |            |            |            |
|---|------------|------------|------------|
| C | 0.9239878  | 2.2263357  | 1.5994695  |
| C | 2.3134215  | 2.2323606  | 1.7757514  |
| C | 2.9751356  | 3.5120752  | 1.8944780  |
| C | 4.3952735  | 3.6604619  | 1.8910551  |
| C | 2.1705538  | 4.7066921  | 1.9881785  |
| C | 2.8105460  | 5.9706968  | 2.1615258  |
| C | 0.7594689  | 4.6160204  | 1.8284342  |
| H | 0.1628128  | 5.5407346  | 1.8488733  |
| C | 0.1239105  | 3.4093832  | 1.5582205  |
| C | 3.6772934  | -1.1615115 | 0.5900120  |
| C | 4.6920491  | -1.3766259 | 1.5167907  |
| H | 5.3393578  | -2.2605153 | 1.4054694  |
| C | 4.8754688  | -0.5291996 | 2.6454253  |
| C | 5.8499470  | -0.8299987 | 3.6440240  |
| C | 4.0283335  | 0.6270096  | 2.8112992  |
| C | 4.1516790  | 1.3850677  | 4.0143940  |
| C | 3.0778437  | 0.9535455  | 1.7745448  |
| C | 2.8966439  | 0.0277920  | 0.7382988  |
| O | 0.2598263  | 1.0107151  | 1.4919633  |
| O | 1.9562715  | 0.2874218  | -0.2521508 |
| P | 0.3562672  | 0.1585271  | 0.0912343  |
| O | -0.3309181 | 0.9193683  | -1.0611732 |
| O | -0.0779400 | -1.2573271 | 0.4227585  |
| C | 4.1923658  | 6.0725674  | 2.1961383  |
| C | 4.9877329  | 4.9069261  | 2.0385465  |
| H | 2.1797723  | 6.8698034  | 2.2445432  |
| H | 4.6735796  | 7.0543383  | 2.3224572  |
| H | 5.0269312  | 2.7717763  | 1.7598481  |
| H | 6.0851722  | 4.9911708  | 2.0264041  |
| C | 5.0942518  | 1.0529964  | 4.9773373  |
| C | 5.9649869  | -0.0525084 | 4.7858346  |
| H | 3.4790310  | 2.2380366  | 4.1791742  |
| H | 5.1622584  | 1.6491327  | 5.9001049  |
| H | 6.7150884  | -0.3005318 | 5.5521737  |
| H | 6.4974460  | -1.7087489 | 3.4967387  |
| C | -1.6298125 | 3.9271053  | -0.1634707 |

|   |            |            |            |    |            |            |            |
|---|------------|------------|------------|----|------------|------------|------------|
| C | -1.3044801 | 3.3707887  | 1.1119242  | H  | 4.1495030  | 0.1639870  | -1.4387659 |
| C | -2.9738537 | 3.9448407  | -0.5648599 | H  | 3.0389809  | -3.0566292 | 2.0136330  |
| C | -2.3256070 | 2.8033634  | 1.9156021  | H  | 3.1884718  | -2.5137624 | -3.8817416 |
| C | -3.6624900 | 2.8619554  | 1.4668642  | Zn | -1.9086236 | 0.3904521  | -2.0279886 |
| C | -4.0154972 | 3.4468334  | 0.2405263  | Br | -3.6739426 | 1.4111517  | -3.1221876 |
| C | -2.0350663 | 2.1654309  | 3.2717803  | C  | -5.8265215 | -4.0198021 | 0.1923442  |
| H | -4.4456001 | 2.4466063  | 2.1185595  | C  | -4.8561123 | -3.0818987 | -0.1654672 |
| C | -2.4715587 | 0.6905099  | 3.3108853  | C  | -5.0836875 | -1.7036311 | 0.0792570  |
| H | -3.5698630 | 0.5802024  | 3.1873416  | C  | -6.2913915 | -1.2872795 | 0.6899284  |
| H | -2.2055172 | 0.2236342  | 4.2811057  | C  | -7.2508094 | -2.2327548 | 1.0630041  |
| H | -1.9794090 | 0.0947227  | 2.5188496  | C  | -7.0172299 | -3.5974430 | 0.8119894  |
| C | -2.6661396 | 2.9777921  | 4.4178223  | H  | -5.6512356 | -5.0891326 | 0.0035440  |
| H | -0.9373985 | 2.1878851  | 3.4266399  | C  | -4.0976042 | -0.7055543 | -0.2891848 |
| H | -3.7739852 | 2.9906908  | 4.3456861  | H  | -6.4629498 | -0.2159518 | 0.8751732  |
| H | -2.3175945 | 4.0305006  | 4.4054155  | H  | -8.1841854 | -1.9112481 | 1.5480557  |
| H | -2.4013732 | 2.5383442  | 5.4017491  | H  | -7.7745741 | -4.3420357 | 1.1024931  |
| C | -5.4547136 | 3.5862604  | -0.2486024 | O  | -2.9460516 | -0.9828944 | -0.7003420 |
| C | -6.4859256 | 2.8309417  | 0.5950268  | C  | -2.9076155 | -4.3093064 | -3.1231220 |
| H | -7.4930434 | 2.9033045  | 0.1378640  | C  | -1.8971476 | -3.6134136 | -2.5127783 |
| H | -6.5566358 | 3.2429332  | 1.6234577  | C  | -1.8890511 | -2.2852886 | -3.1706215 |
| H | -6.2358274 | 1.7549710  | 0.6852219  | O  | -2.8222484 | -2.2117622 | -4.1349630 |
| C | -5.8512019 | 5.0723997  | -0.3604277 | C  | -3.5425356 | -3.4581877 | -4.1736513 |
| H | -5.4709832 | 3.1534755  | -1.2755433 | O  | -1.1657250 | -1.3153939 | -2.8930058 |
| H | -6.8699737 | 5.1798594  | -0.7870403 | C  | -1.0080731 | -3.8877728 | -1.3894778 |
| H | -5.1516258 | 5.6375024  | -1.0070829 | H  | -3.4642715 | -3.8689994 | -5.2052066 |
| H | -5.8450919 | 5.5540116  | 0.6399391  | H  | -4.6156042 | -3.2275507 | -3.9853156 |
| C | -0.5784223 | 4.5196538  | -1.1056582 | Zn | -1.4198085 | -2.7507561 | 0.2372393  |
| C | -0.6418127 | 3.9319884  | -2.5260301 | Br | -2.5133091 | -3.0795085 | 2.2881489  |
| H | 0.1621388  | 4.3671124  | -3.1547910 | H  | 0.0246707  | -3.5418479 | -1.6005685 |
| H | -1.6082783 | 4.1381578  | -3.0290854 | H  | -0.9979821 | -4.9567359 | -1.1034448 |
| H | -0.4981355 | 2.8356604  | -2.5038236 | H  | -3.9237110 | -3.3957432 | -0.6551520 |
| C | -0.6870016 | 6.0562768  | -1.1474880 | H  | -3.2322711 | -5.3340364 | -2.8973852 |
| H | 0.4213539  | 4.2655722  | -0.7008330 | H  | -4.3940157 | 0.3688661  | -0.2144349 |
| H | 0.1082388  | 6.4907807  | -1.7880338 | H  | -3.2252610 | 4.3592344  | -1.5533449 |
| H | -0.5946940 | 6.5039200  | -0.1375975 |    |            |            |            |
| H | -1.6667354 | 6.3740121  | -1.5618929 |    |            |            |            |
| H | 1.7864227  | -5.9411435 | -3.0025049 |    |            |            |            |
| H | 5.3545643  | -1.3065627 | -3.8676979 |    |            |            |            |
| H | 3.6132790  | -5.3465823 | 2.7632055  |    |            |            |            |
| C | 2.2678840  | -5.0898008 | -3.5330130 |    |            |            |            |
| H | 3.4407446  | 1.2519035  | -3.5319379 |    |            |            |            |
| H | 0.9618576  | -5.3406941 | -5.2758976 |    |            |            |            |
| H | 1.1980160  | -4.5621665 | 2.7801067  |    |            |            |            |
| C | 2.6330080  | -4.0610611 | -2.4696697 |    |            |            |            |
| C | 5.4048135  | -0.6688749 | -2.9602945 |    |            |            |            |
| C | 1.2537064  | -4.5488829 | -4.5554027 |    |            |            |            |
| H | 1.6753589  | -3.7071985 | -5.1430301 |    |            |            |            |
| C | 3.0966984  | -2.7808253 | -2.8170931 |    |            |            |            |
| C | 3.6798811  | -5.0769460 | 1.6889711  |    |            |            |            |
| H | 4.2433512  | -6.0578931 | -3.4979872 |    |            |            |            |
| C | 2.5476723  | -4.3740066 | -1.1041467 |    |            |            |            |
| C | 3.5306481  | -5.6293132 | -4.2308788 |    |            |            |            |
| H | 3.2738538  | -6.4191448 | -4.9673256 |    |            |            |            |
| H | 2.1825731  | -5.3737807 | -0.8163456 |    |            |            |            |
| C | 3.0488421  | 0.2448162  | -3.2806392 |    |            |            |            |
| H | 5.8342324  | 0.3097079  | -3.2597956 |    |            |            |            |
| H | 6.1082614  | -1.1509004 | -2.2513767 |    |            |            |            |
| C | 3.4572563  | -1.8254001 | -1.8519565 |    |            |            |            |
| C | 1.2808811  | -4.2253735 | 1.7267396  |    |            |            |            |
| C | 2.8911301  | -3.4569278 | -0.0920333 |    |            |            |            |
| H | 4.7364420  | -4.8259425 | 1.4620410  |    |            |            |            |
| H | 3.4220560  | -5.9825483 | 1.1010252  |    |            |            |            |
| C | 4.0123664  | -0.4837296 | -2.3271008 |    |            |            |            |
| C | 3.3486428  | -2.1613242 | -0.4720585 |    |            |            |            |
| C | 2.7395363  | -3.9017099 | 1.3644914  |    |            |            |            |
| H | 2.0497347  | 0.3706809  | -2.8207744 |    |            |            |            |
| H | 0.6489532  | -3.3218979 | 1.6292041  |    |            |            |            |
| H | 2.9217645  | -0.3062267 | -4.2358414 |    |            |            |            |
| H | 0.3354928  | -4.1836994 | -4.0548883 |    |            |            |            |
| H | 0.8535970  | -5.0259205 | 1.0875111  |    |            |            |            |
| H | 4.0586212  | -4.8184522 | -4.7752558 |    |            |            |            |

### TS2-8-d; COSMO

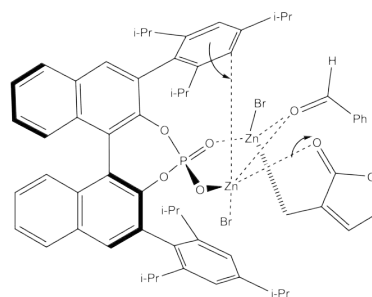

Energy(Hartree) = -11970.03431923

|   |           |            |            |
|---|-----------|------------|------------|
| C | 1.1053135 | 2.4113599  | 1.8333274  |
| C | 2.5020696 | 2.4209790  | 1.8296278  |
| C | 3.1635764 | 3.7054685  | 1.8330170  |
| C | 4.5735884 | 3.8538645  | 1.6704118  |
| C | 2.3646482 | 4.9018574  | 1.9733091  |
| C | 3.0147582 | 6.1713945  | 2.0295212  |
| C | 0.9407358 | 4.8109987  | 1.9719452  |
| H | 0.3517257 | 5.7399247  | 2.0210555  |
| C | 0.2910543 | 3.5915381  | 1.8335729  |
| C | 3.5773156 | -1.0756356 | 0.6300164  |
| C | 4.6652310 | -1.3227457 | 1.4598529  |
| H | 5.2382383 | -2.2536955 | 1.3305024  |
| C | 5.0257177 | -0.4362022 | 2.5140870  |
| C | 6.0842304 | -0.7582578 | 3.4165641  |
| C | 4.2790462 | 0.7843622  | 2.7067463  |
| C | 4.5848266 | 1.5861907  | 3.8482428  |
| C | 3.2344069 | 1.1229054  | 1.7688176  |
| C | 2.8917272 | 0.1672756  | 0.7994768  |
| O | 0.4501284 | 1.1883979  | 1.8429648  |
| O | 1.8654292 | 0.4309084  | -0.1015486 |

|   |            |            |            |    |            |            |            |
|---|------------|------------|------------|----|------------|------------|------------|
| P | 0.3069032  | 0.3922479  | 0.4054535  | H  | 5.6342121  | 0.1534573  | -3.3296451 |
| O | -0.4373782 | 1.2729709  | -0.6130849 | H  | 5.8775565  | -1.2811337 | -2.2765598 |
| O | -0.2259122 | -0.9852920 | 0.7536263  | C  | 3.2041579  | -1.8127973 | -1.7678470 |
| C | 4.3926849  | 6.2751888  | 1.9087433  | C  | 0.9219575  | -4.0442635 | 1.9133878  |
| C | 5.1731064  | 5.1058994  | 1.7079799  | C  | 2.5349054  | -3.3070252 | 0.0748759  |
| H | 2.3944990  | 7.0735682  | 2.1504958  | H  | 4.4095585  | -4.4432372 | 1.7837764  |
| H | 4.8796996  | 7.2614766  | 1.9472228  | H  | 3.1717674  | -5.6899062 | 1.4498976  |
| H | 5.1900476  | 2.9596158  | 1.5059532  | C  | 3.8120057  | -0.5204540 | -2.3085781 |
| H | 6.2625074  | 5.1914088  | 1.5755729  | C  | 3.1001379  | -2.0792785 | -0.3736722 |
| C | 5.6067768  | 1.2345889  | 4.7198036  | C  | 2.3645809  | -3.6470386 | 1.5568511  |
| C | 6.3774884  | 0.0623852  | 4.4953086  | H  | 1.8645434  | 0.3843690  | -2.7713158 |
| H | 3.9905529  | 2.4893913  | 4.0432935  | H  | 0.2180638  | -3.2273161 | 1.6694432  |
| H | 5.8160356  | 1.8671829  | 5.5959866  | H  | 2.6714381  | -0.3528419 | -4.1860345 |
| H | 7.1911694  | -0.2015594 | 5.1879461  | H  | -0.1338847 | -4.2527190 | -3.7616619 |
| H | 6.6526204  | -1.6864155 | 3.2477927  | H  | 0.5929652  | -4.9602223 | 1.3798930  |
| C | -1.6419346 | 3.8186972  | 0.2330232  | H  | 3.5750419  | -4.8616352 | -4.6077623 |
| C | -1.1577675 | 3.4081228  | 1.5076674  | H  | 4.0095953  | 0.1493567  | -1.4480527 |
| C | -2.9088279 | 3.3472337  | -0.1925535 | H  | 2.5949763  | -2.7332835 | 2.1404319  |
| C | -1.9827631 | 2.6236705  | 2.3627416  | H  | 2.8672446  | -2.5796940 | -3.7591027 |
| C | -3.2304188 | 2.1722727  | 1.8970779  | Zn | -2.1670368 | 1.2027592  | -1.4127464 |
| C | -3.7160873 | 2.5069514  | 0.6195876  | Br | -3.1451004 | 1.7477012  | -3.4745857 |
| C | -1.5632291 | 2.3305485  | 3.7993721  | C  | -6.2417813 | -3.6523004 | -0.0117180 |
| H | -3.8408105 | 1.5430359  | 2.5586549  | C  | -5.2296154 | -2.6999539 | -0.1672888 |
| C | -1.7798232 | 0.8724064  | 4.2236143  | C  | -5.1543645 | -1.9447057 | -1.3632585 |
| H | -2.8551137 | 0.6045275  | 4.2744357  | C  | -6.1250530 | -2.1425381 | -2.3824935 |
| H | -1.3531533 | 0.7020506  | 5.2331323  | C  | -7.1371033 | -3.0895984 | -2.2153299 |
| H | -1.2986328 | 0.1692205  | 3.5180291  | C  | -7.1916380 | -3.8509477 | -1.0305275 |
| C | -2.2843606 | 3.3127586  | 4.7457310  | H  | -6.2935542 | -4.2395857 | 0.9173806  |
| H | -0.4781241 | 2.5452927  | 3.8794065  | C  | -4.1322601 | -0.9508255 | -1.6189748 |
| H | -3.3838515 | 3.1621532  | 4.7110457  | H  | -6.0686364 | -1.5444788 | -3.3061033 |
| H | -2.0787158 | 4.3673800  | 4.4707451  | H  | -7.8884052 | -3.2408728 | -3.0046753 |
| H | -1.9528163 | 3.1576775  | 5.7931935  | H  | -7.9876326 | -4.6002417 | -0.8992770 |
| C | -5.1064734 | 2.0944278  | 0.1411354  | O  | -3.2177694 | -0.5838573 | -0.8184956 |
| C | -5.7019511 | 0.9136779  | 0.9188284  | C  | -2.8887580 | -3.1894088 | -3.3555719 |
| H | -6.6155604 | 0.5407880  | 0.4142852  | C  | -1.9193763 | -2.8406286 | -2.4555358 |
| H | -5.9948139 | 1.2137826  | 1.9463094  | C  | -1.2272304 | -1.6487770 | -3.0431207 |
| H | -4.9881940 | 0.0715078  | 1.0092514  | O  | -1.6908629 | -1.4362720 | -4.3135321 |
| C | -6.0599256 | 3.3066299  | 0.1671884  | C  | -2.7492705 | -2.3598745 | -4.5928715 |
| H | -5.0000434 | 1.7957882  | -0.9280721 | O  | -0.4159830 | -0.9036937 | -2.5205927 |
| H | -7.0578974 | 3.0260157  | -0.2274534 | C  | -1.5561507 | -3.3545771 | -1.1431162 |
| H | -5.6743081 | 4.1462361  | -0.4446681 | H  | -2.4745941 | -2.9675570 | -5.4854163 |
| H | -6.1920496 | 3.6748198  | 1.2060035  | H  | -3.6588862 | -1.7758782 | -4.8618912 |
| C | -0.8560625 | 4.7567579  | -0.6797356 | Zn | -1.8747851 | -2.1025814 | 0.4193069  |
| C | -0.7088767 | 4.2557040  | -2.1239509 | Br | -2.8667363 | -2.3100710 | 2.5647693  |
| H | -0.0749085 | 4.9579327  | -2.7028453 | H  | -0.4502494 | -3.4091807 | -1.0429666 |
| H | -1.6804802 | 4.1788160  | -2.6522313 | H  | -2.0153102 | -4.3374257 | -0.9254855 |
| H | -0.2217877 | 3.2605817  | -2.1513908 | H  | -4.5046860 | -2.5337864 | 0.6451047  |
| C | -1.4807391 | 6.1657215  | -0.6342027 | H  | -3.6206983 | -4.0025331 | -3.2537756 |
| H | 0.1685184  | 4.8369170  | -0.2688926 | H  | -4.2030189 | -0.4121421 | -2.5931563 |
| H | -0.8807291 | 6.8775940  | -1.2376772 | H  | -3.3182363 | 3.7107692  | -1.1493469 |
| H | -1.5370968 | 6.5543248  | 0.4032327  |    |            |            |            |
| H | -2.5123315 | 6.1594998  | -1.0449503 |    |            |            |            |
| H | 1.3824258  | -5.9241749 | -2.7019597 |    |            |            |            |
| H | 5.0601786  | -1.4592384 | -3.8605352 |    |            |            |            |
| H | 3.2711295  | -4.9450632 | 3.0777798  |    |            |            |            |
| C | 1.8395896  | -5.0897903 | -3.2785655 |    |            |            |            |
| H | 3.2721953  | 1.2039769  | -3.5423476 |    |            |            |            |
| H | 0.5051149  | -5.3905139 | -4.9923463 |    |            |            |            |
| H | 0.8315202  | -4.2442444 | 3.0006793  |    |            |            |            |
| C | 2.2418810  | -4.0225434 | -2.2672143 |    |            |            |            |
| C | 5.1717041  | -0.7928716 | -2.9794290 |    |            |            |            |
| C | 0.7856750  | -4.5867636 | -4.2803289 |    |            |            |            |
| H | 1.1649125  | -3.7306860 | -4.8765194 |    |            |            |            |
| C | 2.7742110  | -2.7896607 | -2.6817303 |    |            |            |            |
| C | 3.3610481  | -4.7389912 | 1.9909630  |    |            |            |            |
| H | 3.8224870  | -6.0443682 | -3.2863380 |    |            |            |            |
| C | 2.1261112  | -4.2526996 | -0.8865685 |    |            |            |            |
| C | 3.0765568  | -5.6502621 | -4.0058298 |    |            |            |            |
| H | 2.7934035  | -6.4723992 | -4.6957825 |    |            |            |            |
| H | 1.6992652  | -5.2107759 | -0.5467893 |    |            |            |            |
| C | 2.8477727  | 0.2204737  | -3.2518121 |    |            |            |            |

### TS2-8-d

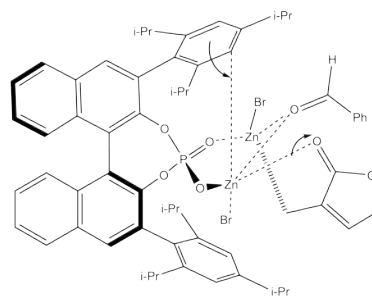

Energy(Hartree)= -11970.02229069  
number of imaginary frequencies: 1

|   |           |           |           |
|---|-----------|-----------|-----------|
| C | 1.1053695 | 2.4104847 | 1.8349825 |
| C | 2.5022266 | 2.4210124 | 1.8301760 |
| C | 3.1630715 | 3.7057664 | 1.8325983 |
| C | 4.5727027 | 3.8546111 | 1.6691231 |
| C | 2.3641753 | 4.9018733 | 1.9731950 |

|   |            |            |            |    |            |            |            |
|---|------------|------------|------------|----|------------|------------|------------|
| C | 3.0144766  | 6.1707949  | 2.0288924  | H  | 3.2838819  | 1.2012248  | -3.5479161 |
| C | 0.9406524  | 4.8098664  | 1.9727862  | H  | 0.4817613  | -5.4029418 | -4.9664735 |
| H | 0.3503451  | 5.7381060  | 2.0209318  | H  | 0.8270479  | -4.2440181 | 3.0011570  |
| C | 0.2907722  | 3.5906104  | 1.8351175  | C  | 2.2473351  | -4.0237425 | -2.2663557 |
| C | 3.5764837  | -1.0753265 | 0.6302897  | C  | 5.1788328  | -0.7946710 | -2.9676137 |
| C | 4.6662267  | -1.3210377 | 1.4576794  | C  | 0.7566292  | -4.6035538 | -4.2471883 |
| H | 5.2384720  | -2.2521272 | 1.3262473  | H  | 1.0960348  | -3.7261703 | -4.8365071 |
| C | 5.0289564  | -0.4341679 | 2.5104631  | C  | 2.7774081  | -2.7900367 | -2.6804737 |
| C | 6.0896336  | -0.7540545 | 3.4103670  | C  | 3.3588486  | -4.7333609 | 1.9940441  |
| C | 4.2820747  | 0.7858594  | 2.7040682  | H  | 3.8548199  | -5.9923613 | -3.3478788 |
| C | 4.5904255  | 1.5885404  | 3.8439105  | C  | 2.1271268  | -4.2524588 | -0.8861972 |
| C | 3.2351988  | 1.1234700  | 1.7685039  | C  | 3.0798446  | -5.6130757 | -4.0438899 |
| C | 2.8908211  | 0.1672629  | 0.8004865  | H  | 2.8003904  | -6.4368293 | -4.7333512 |
| O | 0.4504986  | 1.1882474  | 1.8459701  | H  | 1.7020455  | -5.2113456 | -0.5465152 |
| O | 1.8630972  | 0.4293957  | -0.0989681 | C  | 2.8568523  | 0.2191720  | -3.2570468 |
| P | 0.3057081  | 0.3896826  | 0.4109713  | H  | 5.6440624  | 0.1505342  | -3.3169707 |
| O | -0.4414958 | 1.2708679  | -0.6056210 | H  | 5.8796487  | -1.2821039 | -2.2594377 |
| O | -0.2268725 | -0.9879982 | 0.7580263  | C  | 3.2048557  | -1.8122989 | -1.7668816 |
| C | 4.3917830  | 6.2750790  | 1.9077046  | C  | 0.9186652  | -4.0445935 | 1.9141172  |
| C | 5.1718597  | 5.1063109  | 1.7067511  | C  | 2.5324059  | -3.3057375 | 0.0754731  |
| H | 2.3940179  | 7.0728382  | 2.1499657  | H  | 4.4068851  | -4.4362359 | 1.7871075  |
| H | 4.8784151  | 7.2615106  | 1.9459920  | H  | 3.1732147  | -5.6853663 | 1.4538635  |
| H | 5.1881978  | 2.9598304  | 1.5047006  | C  | 3.8147185  | -0.5205611 | -2.3066962 |
| H | 6.2611602  | 5.1917297  | 1.5739213  | C  | 3.0986338  | -2.0787791 | -0.3730783 |
| C | 5.6150807  | 1.2388491  | 4.7123306  | C  | 2.3603361  | -3.6443150 | 1.5576619  |
| C | 6.3856451  | 0.0674546  | 4.4869936  | H  | 1.8709762  | 0.3866629  | -2.7835475 |
| H | 3.9955519  | 2.4912412  | 4.0388244  | H  | 0.2128310  | -3.2291407 | 1.6713505  |
| H | 5.8262357  | 1.8725830  | 5.5871654  | H  | 2.6837803  | -0.3547998 | -4.1913438 |
| H | 7.2014319  | -0.1954673 | 5.1774507  | H  | -0.1589441 | -4.3055939 | -3.7004380 |
| H | 6.6576965  | -1.6822903 | 3.2410318  | H  | 0.5909925  | -4.9615235 | 1.3814955  |
| C | -1.6416265 | 3.8161602  | 0.2339781  | H  | 3.5425289  | -4.8081809 | -4.6524341 |
| C | -1.1581112 | 3.4074653  | 1.5096881  | H  | 4.0070078  | 0.1507499  | -1.4461653 |
| C | -2.9074936 | 3.3444496  | -0.1910174 | H  | 2.5878956  | -2.7292845 | 2.1403757  |
| C | -1.9826655 | 2.6230543  | 2.3648153  | H  | 2.8722372  | -2.5800769 | -3.7577204 |
| C | -3.2298265 | 2.1712189  | 1.8985075  | Zn | -2.1470253 | 1.1792431  | -1.4441157 |
| C | -3.7138967 | 2.5045180  | 0.6204387  | Br | -3.1640560 | 1.7403384  | -3.4747526 |
| C | -1.5636124 | 2.3288009  | 3.8016007  | C  | -6.2651682 | -3.6430998 | -0.0164268 |
| H | -3.8382336 | 1.5388776  | 2.5590669  | C  | -5.2423409 | -2.7022260 | -0.1759735 |
| C | -1.7682108 | 0.8677339  | 4.2219974  | C  | -5.1629369 | -1.9493664 | -1.3723015 |
| H | -2.8403858 | 0.5868687  | 4.2647889  | C  | -6.1398457 | -2.1373493 | -2.3867411 |
| H | -1.3471302 | 0.6995862  | 5.2341112  | C  | -7.1619524 | -3.0726123 | -2.2155131 |
| H | -1.2738473 | 0.1697885  | 3.5207607  | C  | -7.2209331 | -3.8325384 | -1.0301918 |
| C | -2.2948941 | 3.3021893  | 4.7490856  | H  | -6.3178213 | -4.2271597 | 0.9146861  |
| H | -0.4804463 | 2.5529177  | 3.8839568  | C  | -4.1307006 | -0.9631970 | -1.6315036 |
| H | -3.3929511 | 3.1426111  | 4.7120370  | H  | -6.0793888 | -1.5390751 | -3.3101307 |
| H | -2.0987168 | 4.3594292  | 4.4775588  | H  | -7.9185610 | -3.2151618 | -3.0015656 |
| H | -1.9651252 | 3.1474737  | 5.7971281  | H  | -8.0252368 | -4.5723791 | -0.8954667 |
| C | -5.1009160 | 2.0857279  | 0.1378783  | O  | -3.2190625 | -0.5974427 | -0.8297663 |
| C | -5.6929337 | 0.9017049  | 0.9134092  | C  | -2.8879416 | -3.1643421 | -3.3403788 |
| H | -6.6012754 | 0.5209091  | 0.4049445  | C  | -1.9126550 | -2.8344204 | -2.4383181 |
| H | -5.9947836 | 1.2008287  | 1.9385836  | C  | -1.2040471 | -1.6487870 | -3.0235192 |
| H | -4.9742812 | 0.0646252  | 1.0117001  | O  | -1.6552159 | -1.4338959 | -4.2970887 |
| C | -6.0606981 | 3.2926795  | 0.1606367  | C  | -2.7240631 | -2.3402204 | -4.5801477 |
| H | -4.9881708 | 1.7881992  | -0.9310257 | O  | -0.3932340 | -0.9108704 | -2.4923118 |
| H | -7.0560711 | 3.0091256  | -0.2387145 | C  | -1.5587329 | -3.3508919 | -1.1276978 |
| H | -5.6763485 | 4.1350746  | -0.4479944 | H  | -2.4506898 | -2.9562550 | -5.4680945 |
| H | -6.1993851 | 3.6599140  | 1.1988666  | H  | -3.6209736 | -1.7409229 | -4.8596298 |
| C | -0.8539893 | 4.7498975  | -0.6823538 | Zn | -1.8823070 | -2.1000335 | 0.4429341  |
| C | -0.7011478 | 4.2398660  | -2.1230010 | Br | -2.9118281 | -2.2871742 | 2.5587909  |
| H | -0.0695445 | 4.9407416  | -2.7061013 | H  | -0.4538934 | -3.4011240 | -1.0158994 |
| H | -1.6702377 | 4.1533820  | -2.6543783 | H  | -2.0208008 | -4.3319936 | -0.9094735 |
| H | -0.2074835 | 3.2479791  | -2.1432725 | H  | -4.5137082 | -2.5438935 | 0.6356506  |
| C | -1.4804416 | 6.1581831  | -0.6478560 | H  | -3.6316532 | -3.9668870 | -3.2404504 |
| H | 0.1692127  | 4.8341923  | -0.2687250 | H  | -4.1963500 | -0.4266474 | -2.6076087 |
| H | -0.8803472 | 6.8681910  | -1.2534937 | H  | -3.3128358 | 3.6989448  | -1.1528862 |
| H | -1.5421594 | 6.5530319  | 0.3869059  |    |            |            |            |
| H | -2.5106916 | 6.1487596  | -1.0617127 |    |            |            |            |
| H | 1.4271535  | -5.9427520 | -2.7010143 |    |            |            |            |
| H | 5.0737042  | -1.4629354 | -3.8479499 |    |            |            |            |
| H | 3.2688087  | -4.9388083 | 3.0808775  |    |            |            |            |
| C | 1.8491246  | -5.0910676 | -3.2793437 |    |            |            |            |

TS3-8-d; COSMO

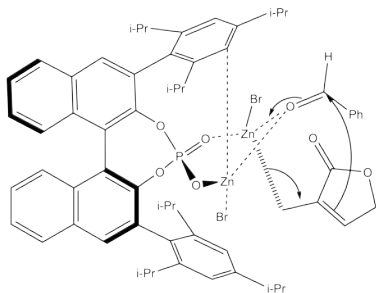

Energy(Hartree) = -11970.03402068

|   |            |            |            |
|---|------------|------------|------------|
| C | 1.1335692  | 2.4057871  | 1.6391810  |
| C | 2.5290799  | 2.4131390  | 1.6109579  |
| C | 3.1904950  | 3.6972666  | 1.5834490  |
| C | 4.5959092  | 3.8406472  | 1.3827475  |
| C | 2.3974906  | 4.8959461  | 1.7367342  |
| C | 3.0507914  | 6.1648270  | 1.7628472  |
| C | 0.9742604  | 4.8065047  | 1.7861012  |
| H | 0.3875796  | 5.7353429  | 1.8583669  |
| C | 0.3226041  | 3.5858864  | 1.6716083  |
| C | 3.5962161  | -1.1343833 | 0.5574802  |
| C | 4.6876036  | -1.3411334 | 1.3931461  |
| H | 5.2618442  | -2.2755742 | 1.3010063  |
| C | 5.0517572  | -0.4088032 | 2.4047875  |
| C | 6.1127071  | -0.6901555 | 3.3177637  |
| C | 4.3050865  | 0.8182764  | 2.5424481  |
| C | 4.6117256  | 1.6692720  | 3.6477844  |
| C | 3.2586748  | 1.1136558  | 1.5905028  |
| C | 2.9088431  | 0.1144516  | 0.6686245  |
| O | 0.4711979  | 1.1898987  | 1.6663613  |
| O | 1.8801577  | 0.3396807  | -0.2463681 |
| P | 0.3237520  | 0.3377401  | 0.2601318  |
| O | -0.4427201 | 1.1465789  | -0.8034349 |
| O | -0.2241187 | -1.0127157 | 0.6973811  |
| C | 4.4248536  | 6.2645197  | 1.6017320  |
| C | 5.1978792  | 5.0919093  | 1.3912245  |
| H | 2.4360193  | 7.0693356  | 1.8937436  |
| H | 4.9143479  | 7.2501741  | 1.6168561  |
| H | 5.2054460  | 2.9426730  | 1.2120632  |
| H | 6.2833159  | 5.1744546  | 1.2282688  |
| C | 5.6353637  | 1.3571895  | 4.5322909  |
| C | 6.4076472  | 0.1776329  | 4.3582871  |
| H | 4.0170368  | 2.5790445  | 3.8066156  |
| H | 5.8443481  | 2.0276385  | 5.3799159  |
| H | 7.2229117  | -0.0544943 | 5.0603735  |
| H | 6.6807643  | -1.6248596 | 3.1889107  |
| C | -1.6777109 | 3.7954320  | 0.1590414  |
| C | -1.1366766 | 3.3902552  | 1.4103684  |
| C | -2.9647069 | 3.3183136  | -0.2076505 |
| C | -1.9198691 | 2.6062736  | 2.3062516  |
| C | -3.1870935 | 2.1499526  | 1.9017154  |
| C | -3.7363404 | 2.4820700  | 0.6491804  |
| C | -1.4346836 | 2.3150656  | 3.7217542  |
| H | -3.7647791 | 1.5204997  | 2.5918699  |
| C | -1.6119020 | 0.8516465  | 4.1473729  |
| H | -2.6795416 | 0.5655999  | 4.2398249  |
| H | -1.1423646 | 0.6849196  | 5.1380830  |
| H | -1.1460692 | 0.1590188  | 3.4213961  |
| C | -2.1319952 | 3.2824714  | 4.7009157  |
| H | -0.3508815 | 2.5468039  | 3.7565468  |
| H | -3.2291792 | 3.1133286  | 4.7131817  |
| H | -1.9555253 | 4.3413301  | 4.4222342  |
| H | -1.7529582 | 3.1287591  | 5.7321325  |
| C | -5.1514557 | 2.0780343  | 0.2418426  |
| C | -5.7067887 | 0.8947330  | 1.0428600  |
| H | -6.6453492 | 0.5259887  | 0.5840803  |
| H | -5.9425441 | 1.1870424  | 2.0871456  |

|    |            |            |            |
|----|------------|------------|------------|
| H  | -4.9911318 | 0.0512517  | 1.0806367  |
| C  | -6.0928084 | 3.2971891  | 0.3281707  |
| H  | -5.1044066 | 1.7836926  | -0.8326455 |
| H  | -7.1123820 | 3.0231374  | -0.0112879 |
| H  | -5.7382556 | 4.1382937  | -0.3003703 |
| H  | -6.1647940 | 3.6598097  | 1.3747764  |
| C  | -0.9427254 | 4.7474562  | -0.7796610 |
| C  | -0.8367190 | 4.2524830  | -2.2288018 |
| H  | -0.2200262 | 4.9589134  | -2.8207861 |
| H  | -1.8229169 | 4.1763322  | -2.7286930 |
| H  | -0.3509284 | 3.2574061  | -2.2758600 |
| C  | -1.5907581 | 6.1447124  | -0.7055363 |
| H  | 0.0934011  | 4.8442676  | -0.4037575 |
| H  | -1.0239406 | 6.8674683  | -1.3274938 |
| H  | -1.6163289 | 6.5295082  | 0.3344973  |
| H  | -2.6355648 | 6.1230225  | -1.0806430 |
| H  | 1.4925321  | -6.1502904 | -2.5699213 |
| H  | 5.2749154  | -1.8149171 | -3.8259045 |
| H  | 3.1967464  | -4.7954766 | 3.2096981  |
| C  | 1.8364262  | -5.2893156 | -3.1849192 |
| H  | 3.5581951  | 0.9081904  | -3.7177359 |
| H  | 0.3047668  | -5.6052613 | -4.7284620 |
| H  | 0.7533469  | -4.1658325 | 3.0332121  |
| C  | 2.2983262  | -4.2088871 | -2.2136734 |
| C  | 5.3695899  | -1.1075304 | -2.9752744 |
| C  | 0.6356319  | -4.8134683 | -4.0243183 |
| H  | 0.8932922  | -3.9130293 | -4.6203534 |
| C  | 2.9073783  | -3.0295635 | -2.6742522 |
| C  | 3.3116502  | -4.6525749 | 2.1150341  |
| H  | 3.8411043  | -6.1455654 | -3.4781191 |
| C  | 2.1106333  | -4.3526160 | -0.8289574 |
| C  | 2.9822434  | -5.7889558 | -4.0820552 |
| H  | 2.6422883  | -6.6256991 | -4.7269659 |
| H  | 1.6346229  | -5.2742171 | -0.4550414 |
| C  | 3.0896829  | -0.0443688 | -3.3934886 |
| H  | 5.8731444  | -0.1931300 | -3.3528271 |
| H  | 6.0318763  | -1.5782727 | -2.2199647 |
| C  | 3.3235320  | -2.0119747 | -1.8003336 |
| C  | 0.8620572  | -4.0318902 | 1.9375760  |
| C  | 2.5114913  | -3.3660080 | 0.0933606  |
| H  | 4.3580332  | -4.3439510 | 1.9177424  |
| H  | 3.1591633  | -5.6379114 | 1.6263441  |
| C  | 3.9919133  | -0.7663813 | -2.3772835 |
| C  | 3.1337616  | -2.1860521 | -0.4028301 |
| C  | 2.3001181  | -3.6159356 | 1.5880611  |
| H  | 2.0963261  | 0.1704387  | -2.9565144 |
| H  | 0.1393501  | -3.2546407 | 1.6306646  |
| H  | 2.9265498  | -0.6612776 | -4.3019280 |
| H  | -0.2238815 | -4.5509257 | -3.3766387 |
| H  | 0.5719396  | -4.9907289 | 1.4595865  |
| H  | 3.3526759  | -4.9844991 | -4.7511896 |
| H  | 4.1722266  | -0.0612110 | -1.5405954 |
| H  | 2.4918059  | -2.6605297 | 2.1174724  |
| H  | 3.0537463  | -2.8870306 | -3.7566594 |
| Zn | -2.3123926 | 1.2705338  | -1.2857776 |
| Br | -3.2321924 | 1.7334460  | -3.4164771 |
| C  | -6.4821087 | -3.3311089 | 0.2176424  |
| C  | -5.3413768 | -2.5572622 | -0.0317527 |
| C  | -5.2127272 | -1.8569569 | -1.2527548 |
| C  | -6.2601332 | -1.9367259 | -2.2081292 |
| C  | -7.4000899 | -2.7017926 | -1.9491688 |
| C  | -7.5116467 | -3.4079465 | -0.7352424 |
| H  | -6.5681963 | -3.8708921 | 1.1726371  |
| C  | -4.0597668 | -1.0255037 | -1.5946234 |
| H  | -6.1684335 | -1.3845300 | -3.1571191 |
| H  | -8.2100405 | -2.7499357 | -2.6923563 |
| H  | -8.4083820 | -4.0131654 | -0.5319120 |
| O  | -3.1808336 | -0.6023450 | -0.7285856 |
| C  | -3.0481948 | -2.6455280 | -3.0400341 |
| C  | -1.9137576 | -2.7435203 | -2.2403492 |
| C  | -0.8986301 | -1.8023154 | -2.8383371 |

|    |            |            |            |
|----|------------|------------|------------|
| O  | -1.3757840 | -1.3485467 | -4.0377013 |
| C  | -2.6783103 | -1.8977048 | -4.2929944 |
| O  | 0.1744545  | -1.4626002 | -2.3889253 |
| C  | -1.6599701 | -3.3930310 | -1.0048998 |
| H  | -2.6152433 | -2.5744821 | -5.1752712 |
| H  | -3.3545923 | -1.0559842 | -4.5568608 |
| Zn | -1.9816678 | -1.9439440 | 0.4800912  |
| Br | -2.8415643 | -2.3591089 | 2.6395166  |
| H  | -0.5849623 | -3.5295195 | -0.7766409 |
| H  | -2.3115224 | -4.2431245 | -0.7385819 |
| H  | -4.5607487 | -2.4865618 | 0.7400763  |
| H  | -3.9086224 | -3.3250840 | -3.0023563 |
| H  | -4.1550406 | -0.4271505 | -2.5220189 |
| H  | -3.4284112 | 3.6987815  | -1.1325586 |

### TS3-8-d

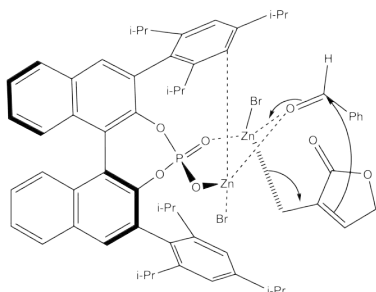

Energy(Hartree)= -11970.02295354  
number of imaginary frequencies: 1

|   |            |            |            |
|---|------------|------------|------------|
| C | 1.1338648  | 2.4085420  | 1.6349823  |
| C | 2.5293924  | 2.4159754  | 1.6046215  |
| C | 3.1905825  | 3.7001000  | 1.5773644  |
| C | 4.5953958  | 3.8432082  | 1.3738355  |
| C | 2.3988008  | 4.8988613  | 1.7344618  |
| C | 3.0533589  | 6.1665692  | 1.7614623  |
| C | 0.9759797  | 4.8091484  | 1.7872242  |
| H | 0.3887482  | 5.7375182  | 1.8625651  |
| C | 0.3235922  | 3.5892128  | 1.6718191  |
| C | 3.5920837  | -1.1336118 | 0.5546731  |
| C | 4.6842837  | -1.3392628 | 1.3891017  |
| H | 5.2560793  | -2.2751543 | 1.2968219  |
| C | 5.0518859  | -0.4055954 | 2.3977492  |
| C | 6.1142514  | -0.6851991 | 3.3088301  |
| C | 4.3068830  | 0.8223723  | 2.5339943  |
| C | 4.6172018  | 1.6752885  | 3.6365117  |
| C | 3.2588247  | 1.1166055  | 1.5835464  |
| C | 2.9061829  | 0.1161470  | 0.6640620  |
| O | 0.4703882  | 1.1945519  | 1.6617413  |
| O | 1.8768020  | 0.3401075  | -0.2496277 |
| P | 0.3210312  | 0.3399749  | 0.2568821  |
| O | -0.4456988 | 1.1496616  | -0.8065693 |
| O | -0.2304335 | -1.0080706 | 0.6958805  |
| C | 4.4266054  | 6.2659571  | 1.5977884  |
| C | 5.1980184  | 5.0936320  | 1.3835673  |
| H | 2.4394147  | 7.0712524  | 1.8952968  |
| H | 4.9165305  | 7.2513322  | 1.6137716  |
| H | 5.2028140  | 2.9443910  | 1.2007485  |
| H | 6.2831277  | 5.1755648  | 1.2185043  |
| C | 5.6428216  | 1.3647677  | 4.5185986  |
| C | 6.4131690  | 0.1845174  | 4.3458686  |
| H | 4.0233457  | 2.5856741  | 3.7941331  |
| H | 5.8545074  | 2.0373411  | 5.3638098  |
| H | 7.2299891  | -0.0468446 | 5.0463116  |
| H | 6.6804044  | -1.6211762 | 3.1810412  |
| C | -1.6821998 | 3.8001385  | 0.1666601  |
| C | -1.1364118 | 3.3936075  | 1.4154521  |

|   |            |            |            |
|---|------------|------------|------------|
| C | -2.9692631 | 3.3219760  | -0.1961752 |
| C | -1.9145663 | 2.6051204  | 2.3117370  |
| C | -3.1812810 | 2.1459368  | 1.9093015  |
| C | -3.7352577 | 2.4809204  | 0.6598760  |
| C | -1.4242711 | 2.3113799  | 3.7251907  |
| H | -3.7527916 | 1.5089925  | 2.5977382  |
| C | -1.5938666 | 0.8465471  | 4.1487713  |
| H | -2.6592515 | 0.5528947  | 4.2417986  |
| H | -1.1228228 | 0.6801754  | 5.1386908  |
| H | -1.1242271 | 0.1566319  | 3.4230337  |
| C | -2.1221525 | 3.2743373  | 4.7082190  |
| H | -0.3412879 | 2.5476567  | 3.7568844  |
| H | -3.2186628 | 3.1015525  | 4.7235511  |
| H | -1.9510790 | 4.3345783  | 4.4316284  |
| H | -1.7406328 | 3.1202177  | 5.7384226  |
| C | -5.1486810 | 2.0698652  | 0.2533797  |
| C | -5.6985080 | 0.8842517  | 1.0548459  |
| H | -6.6351978 | 0.5099159  | 0.5966799  |
| H | -5.9366566 | 1.1758066  | 2.0988208  |
| H | -4.9793026 | 0.0439569  | 1.0956391  |
| C | -6.0965086 | 3.2838639  | 0.3381667  |
| H | -5.0992216 | 1.7755510  | -0.8210123 |
| H | -7.1150779 | 3.0054778  | -0.0008526 |
| H | -5.7466563 | 4.1265171  | -0.2908041 |
| H | -6.1708382 | 3.6479434  | 1.3840566  |
| C | -0.9501070 | 4.7518214  | -0.7752872 |
| C | -0.8350080 | 4.2480597  | -2.2208935 |
| H | -0.2224536 | 4.9552459  | -2.8163012 |
| H | -1.8180091 | 4.1589034  | -2.7248551 |
| H | -0.3394475 | 3.2576178  | -2.2600491 |
| C | -1.6063967 | 6.1455308  | -0.7121975 |
| H | 0.0838927  | 4.8573261  | -0.3957706 |
| H | -1.0418809 | 6.8690160  | -1.3354339 |
| H | -1.6401080 | 6.5361761  | 0.3254590  |
| H | -2.6493261 | 6.1168428  | -1.0919320 |
| H | 1.4932211  | -6.1578882 | -2.5596531 |
| H | 5.2812603  | -1.8317522 | -3.8173410 |
| H | 3.1840534  | -4.7846270 | 3.2178091  |
| C | 1.8319851  | -5.2961530 | -3.1767163 |
| H | 3.5672569  | 0.8958353  | -3.7272813 |
| O | 0.2937257  | -5.6159017 | -4.7138698 |
| H | 0.7404268  | -4.1530075 | 3.0376849  |
| C | 2.2945197  | -4.2138613 | -2.2078900 |
| C | 5.3728187  | -1.1205315 | -2.9697259 |
| C | 0.6257719  | -4.8239056 | -4.0103941 |
| H | 0.8780584  | -3.9222248 | -4.6068355 |
| C | 2.9061872  | -3.0373441 | -2.6709666 |
| C | 3.2996356  | -4.6448392 | 2.1229006  |
| H | 3.8383678  | -6.1440569 | -3.4781579 |
| C | 2.1031241  | -4.3526019 | -0.8234960 |
| C | 2.9747426  | -5.7936996 | -4.0784898 |
| H | 2.6356629  | -6.6335900 | -4.7197205 |
| H | 1.6259816  | -5.2727433 | -0.4474191 |
| C | 3.0963285  | -0.0548868 | -3.4017311 |
| H | 5.8794434  | -0.2089016 | -3.3496621 |
| H | 6.0310948  | -1.5893293 | -2.2099735 |
| C | 3.3215426  | -2.0173275 | -1.7999882 |
| C | 0.8511946  | -4.0223703 | 1.9421010  |
| C | 2.5034792  | -3.3641045 | 0.0964706  |
| H | 4.3465050  | -4.3385357 | 1.9252344  |
| H | 3.1475557  | -5.6314656 | 1.6369840  |
| C | 3.9931465  | -0.7746683 | -2.3793518 |
| C | 3.1284044  | -2.1870799 | -0.4027572 |
| C | 2.2896881  | -3.6089199 | 1.5917662  |
| H | 2.1013090  | 0.1645302  | -2.9712859 |
| H | 0.1289980  | -3.2452731 | 1.6340401  |
| H | 2.9358221  | -0.6733518 | -4.3094828 |
| H | -0.2314681 | -4.5640511 | -3.3586399 |
| H | 0.5595055  | -4.9822545 | 1.4671937  |
| H | 3.3388451  | -4.9900238 | -4.7517971 |
| H | 4.1710845  | -0.0665922 | -1.5445681 |

|    |            |            |            |
|----|------------|------------|------------|
| H  | 2.4817098  | -2.6521190 | 2.1185735  |
| H  | 3.0552842  | -2.8981630 | -3.7533784 |
| Zn | -2.3091006 | 1.2711170  | -1.3022030 |
| Br | -3.2701744 | 1.7565021  | -3.4046052 |
| C  | -6.4788913 | -3.3500663 | 0.1898032  |
| C  | -5.3420991 | -2.5671927 | -0.0497069 |
| C  | -5.2145101 | -1.8571992 | -1.2651121 |
| C  | -6.2599628 | -1.9355010 | -2.2227982 |
| C  | -7.3956066 | -2.7097014 | -1.9733277 |
| C  | -7.5055211 | -3.4263361 | -0.7655964 |
| H  | -6.5621905 | -3.8965336 | 1.1414848  |
| C  | -4.0651176 | -1.0160953 | -1.5999282 |
| H  | -6.1693691 | -1.3724766 | -3.1659153 |
| H  | -8.2039329 | -2.7559460 | -2.7187906 |
| H  | -8.3990064 | -4.0387962 | -0.5693417 |
| O  | -3.1884061 | -0.5959547 | -0.7331463 |
| C  | -3.0365522 | -2.6212903 | -3.0485161 |
| C  | -1.9123874 | -2.7336767 | -2.2357770 |
| C  | -0.8812361 | -1.7981883 | -2.8171543 |
| O  | -1.3426344 | -1.3278535 | -4.0160650 |
| C  | -2.6461516 | -1.8597640 | -4.2884951 |
| O  | 0.1910386  | -1.4768985 | -2.3542370 |
| C  | -1.6757131 | -3.3885256 | -1.0008845 |
| H  | -2.5814269 | -2.5248124 | -5.1803591 |
| H  | -3.3110668 | -1.0064522 | -4.5457539 |
| Zn | -1.9891663 | -1.9390825 | 0.4906292  |
| Br | -2.8803656 | -2.3289985 | 2.6326417  |
| H  | -0.6041903 | -3.5348663 | -0.7624132 |
| H  | -2.3381090 | -4.2313778 | -0.7390144 |
| H  | -4.5654338 | -2.4973700 | 0.7271759  |
| H  | -3.9028825 | -3.2939747 | -3.0257661 |
| H  | -4.1620269 | -0.4146971 | -2.5256215 |
| H  | -3.4347362 | 3.6990129  | -1.1215345 |

|   |            |            |            |
|---|------------|------------|------------|
| O | -0.4737442 | 1.2178407  | -0.6705433 |
| O | -0.2749639 | -0.9864744 | 0.7701808  |
| C | 4.5526328  | 6.1352501  | 2.0144112  |
| C | 5.2841477  | 4.9393042  | 1.7883955  |
| H | 2.5875292  | 7.0084359  | 2.2707727  |
| H | 5.0796134  | 7.0997427  | 2.0742750  |
| H | 5.2143213  | 2.8006892  | 1.5385093  |
| H | 6.3761838  | 4.9822356  | 1.6567670  |
| C | 5.5559080  | 1.0826885  | 4.7480062  |
| C | 6.3381412  | -0.0750813 | 4.4901400  |
| H | 3.9336919  | 2.3463544  | 4.1008948  |
| H | 5.7550008  | 1.6883648  | 5.6453007  |
| H | 7.1506037  | -0.3539546 | 5.1783598  |
| H | 6.6358336  | -1.7801883 | 3.1883623  |
| C | -1.5653507 | 3.9955826  | 0.2779420  |
| C | -1.1144823 | 3.5378619  | 1.5520602  |
| C | -2.8722253 | 3.6682219  | -0.1250733 |
| C | -1.9985439 | 2.8301133  | 2.4093053  |
| C | -3.2972856 | 2.5329748  | 1.9583972  |
| C | -3.7459373 | 2.9166100  | 0.6834299  |
| C | -1.5828703 | 2.4288821  | 3.8225280  |
| H | -3.9638195 | 1.9621527  | 2.6202999  |
| C | -1.8933822 | 0.9615580  | 4.1552994  |
| H | -2.9844889 | 0.7651584  | 4.1957794  |
| H | -1.4746173 | 0.6951008  | 5.1477816  |
| H | -1.4652263 | 0.2759776  | 3.3994305  |
| C | -2.2185605 | 3.3885102  | 4.8480471  |
| H | -0.4836932 | 2.5615283  | 3.8973178  |
| H | -3.3265200 | 3.3179350  | 4.8233607  |
| H | -1.9444268 | 4.4428393  | 4.6391738  |
| H | -1.8859847 | 3.1423008  | 5.8780823  |
| C | -5.1402696 | 2.5763540  | 0.1663665  |
| C | -5.7825407 | 1.3686875  | 0.8626870  |
| H | -6.7116452 | 1.0631695  | 0.3391019  |
| H | -6.0669373 | 1.6087808  | 1.9084607  |
| H | -5.1013309 | 0.4935809  | 0.9094058  |
| C | -6.0648002 | 3.8077884  | 0.2379855  |
| H | -5.0122111 | 2.3293172  | -0.9133478 |
| H | -7.0606269 | 3.5851474  | -0.1991796 |
| H | -5.6342414 | 4.6705050  | -0.3087595 |
| H | -6.2152322 | 4.1185245  | 1.2932460  |
| C | -0.6862795 | 4.8273342  | -0.6570106 |
| C | -0.6210111 | 4.2899236  | -2.0944751 |
| H | 0.0831305  | 4.8990573  | -2.6980856 |
| H | -1.6046210 | 4.3154479  | -2.6051897 |
| H | -0.2653618 | 3.2414634  | -2.1064346 |
| C | -1.1395889 | 6.3003550  | -0.6344670 |
| H | 0.3482383  | 4.7965202  | -0.2631731 |
| H | -0.4737184 | 6.9287807  | -1.2620751 |
| H | -1.1335913 | 6.7131815  | 0.3952203  |
| H | -2.1731952 | 6.4034914  | -1.0270851 |
| H | 0.7372295  | -5.5150031 | -2.8436207 |
| H | 4.8016073  | -1.3597373 | -4.0240063 |
| H | 3.3752376  | -5.1601585 | 2.9116543  |
| C | 1.6371795  | -5.0598680 | -3.3169248 |
| H | 3.0360241  | 1.2610598  | -3.5329767 |
| H | 0.7322478  | -5.2905112 | -5.2907378 |
| H | 0.9811863  | -4.2955996 | 2.9865677  |
| C | 2.1433286  | -4.0067509 | -2.3358168 |
| C | 4.9675127  | -0.7229360 | -3.1297917 |
| C | 1.2068325  | -4.4974817 | -4.6777808 |
| H | 2.0729702  | -4.1133542 | -5.2559587 |
| C | 2.6222838  | -2.7514812 | -2.7392791 |
| C | 3.4199222  | -4.9248981 | 1.8281084  |
| H | 2.9650312  | -6.6293621 | -2.5219982 |
| C | 2.1463746  | -4.2917868 | -0.9577134 |
| C | 2.6827939  | -6.1791292 | -3.4948203 |
| H | 2.2951790  | -6.9878338 | -4.1488218 |
| H | 1.7565931  | -5.2670019 | -0.6211576 |
| C | 2.6273653  | 0.2778149  | -3.2209707 |
| H | 5.4016218  | 0.2378125  | -3.4766395 |

### int1-8-d; COSMO

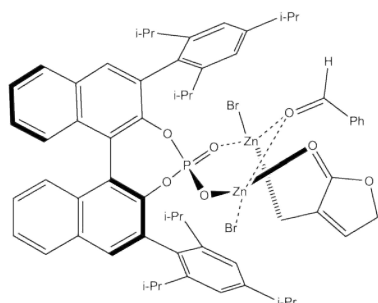

Energy(Hartree)= -11970.04196693

|   |           |            |            |
|---|-----------|------------|------------|
| C | 1.1058607 | 2.4125799  | 1.8348262  |
| C | 2.5024417 | 2.3628088  | 1.8510722  |
| C | 3.2179115 | 3.6194577  | 1.8831950  |
| C | 4.6333349 | 3.7141616  | 1.7241990  |
| C | 2.4700483 | 4.8444622  | 2.0476475  |
| C | 3.1714897 | 6.0849430  | 2.1315824  |
| C | 1.0447130 | 4.8100801  | 2.0456153  |
| H | 0.4914292 | 5.7592738  | 2.1164274  |
| C | 0.3432942 | 3.6241707  | 1.8709667  |
| C | 3.5575931 | -1.1151188 | 0.5844314  |
| C | 4.6514605 | -1.3752314 | 1.4032513  |
| H | 5.2340958 | -2.2957918 | 1.2435395  |
| C | 5.0004588 | -0.5214745 | 2.4874768  |
| C | 6.0580343 | -0.8631278 | 3.3839757  |
| C | 4.2420530 | 0.6852813  | 2.7152756  |
| C | 4.5359996 | 1.4538790  | 3.8822832  |
| C | 3.2013263 | 1.0479541  | 1.7812753  |
| C | 2.8564239 | 0.1139734  | 0.7927122  |
| O | 0.3907510 | 1.2199200  | 1.8108417  |
| O | 1.8262726 | 0.3952928  | -0.0954076 |
| P | 0.2585015 | 0.3901342  | 0.4035566  |

|    |            |            |            |
|----|------------|------------|------------|
| H  | 5.7196850  | -1.2296828 | -2.4913103 |
| C  | 3.0961922  | -1.7961398 | -1.8190044 |
| C  | 1.0294063  | -4.0586117 | 1.9038656  |
| C  | 2.5868023  | -3.3694046 | 0.0074199  |
| H  | 4.4729262  | -4.6886116 | 1.5714483  |
| H  | 3.1413796  | -5.8452886 | 1.2729580  |
| C  | 3.6539754  | -0.4814847 | -2.3613428 |
| C  | 3.0810364  | -2.1045119 | -0.4313841 |
| C  | 2.4795847  | -3.7552620 | 1.4846585  |
| H  | 1.6909891  | 0.4547164  | -2.6586361 |
| H  | 0.3794022  | -3.1813287 | 1.7193929  |
| H  | 2.3698207  | -0.2821171 | -4.1441764 |
| H  | 0.4815064  | -3.6659002 | -4.5720816 |
| H  | 0.6082126  | -4.9255062 | 1.3534201  |
| H  | 3.6076936  | -5.7763430 | -3.9585832 |
| H  | 3.9038237  | 0.1662870  | -1.4977189 |
| H  | 2.8033488  | -2.8841577 | 2.0868448  |
| H  | 2.6324025  | -2.4947573 | -3.8086995 |
| Zn | -1.7317556 | 0.6715440  | -2.0130263 |
| Br | -2.9854537 | 1.7726181  | -3.6312756 |
| C  | -6.0371075 | -3.9401542 | -0.7768372 |
| C  | -5.0316104 | -2.9765876 | -0.8829712 |
| C  | -5.3479991 | -1.6826040 | -1.3689860 |
| C  | -6.6796751 | -1.3767369 | -1.7507740 |
| C  | -7.6822468 | -2.3436608 | -1.6342310 |
| C  | -7.3589135 | -3.6238148 | -1.1461993 |
| H  | -5.7957525 | -4.9437355 | -0.3966424 |
| C  | -4.3573141 | -0.6336286 | -1.5066068 |
| H  | -6.9147931 | -0.3705694 | -2.1321326 |
| H  | -8.7169006 | -2.1060712 | -1.9221661 |
| H  | -8.1474107 | -4.3867721 | -1.0542434 |
| O  | -3.1572332 | -0.7076151 | -1.1499191 |
| C  | -2.4505660 | -4.0482520 | -3.2171146 |
| C  | -1.6867565 | -3.3392433 | -2.3294977 |
| C  | -1.3747217 | -2.0656049 | -3.0166375 |
| O  | -1.8810718 | -2.0482748 | -4.2640236 |
| C  | -2.6056301 | -3.2764715 | -4.4834185 |
| O  | -0.7763941 | -1.0773498 | -2.5576632 |
| C  | -1.2596032 | -3.5863419 | -0.9518741 |
| H  | -2.1716820 | -3.7807502 | -5.3754163 |
| H  | -3.6564580 | -3.0043938 | -4.7284636 |
| Zn | -1.8576753 | -2.1983274 | 0.3884874  |
| Br | -3.4311168 | -1.9598646 | 2.1246417  |
| H  | -0.1641952 | -3.4315274 | -0.8675551 |
| H  | -1.5081249 | -4.6126793 | -0.6192805 |
| H  | -3.9983985 | -3.2094535 | -0.5939270 |
| H  | -2.8956143 | -5.0397723 | -3.0582188 |
| H  | -4.6969286 | 0.3072505  | -2.0040584 |
| H  | -3.2162536 | 3.9828170  | -1.1236263 |

### int1-8-d

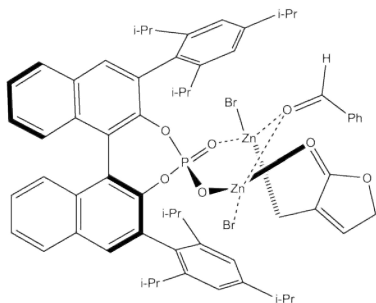

Energy(Hartree) = -11970.02874855

|   |           |           |           |
|---|-----------|-----------|-----------|
| C | 1.1143574 | 2.4024443 | 1.7935716 |
| C | 2.5106694 | 2.3545541 | 1.8214229 |
| C | 3.2247330 | 3.6112616 | 1.8602753 |
| C | 4.6410445 | 3.7060938 | 1.7124172 |
| C | 2.4753684 | 4.8353098 | 2.0222770 |
| C | 3.1762413 | 6.0751415 | 2.1119950 |
| C | 1.0504297 | 4.7985617 | 2.0165914 |

|   |            |            |            |
|---|------------|------------|------------|
| H | 0.4944269  | 5.7458970  | 2.0912187  |
| C | 0.3507153  | 3.6127425  | 1.8357475  |
| C | 3.5656800  | -1.1422696 | 0.6095381  |
| C | 4.6437892  | -1.3989522 | 1.4498892  |
| H | 5.2191300  | -2.3274867 | 1.3120577  |
| C | 4.9843758  | -0.5328364 | 2.5260355  |
| C | 6.0255138  | -0.8689189 | 3.4428814  |
| C | 4.2318153  | 0.6821992  | 2.7245326  |
| C | 4.5133489  | 1.4643122  | 3.8854294  |
| C | 3.2090434  | 1.0392614  | 1.7688997  |
| C | 2.8740446  | 0.0965888  | 0.7853040  |
| O | 0.4004643  | 1.2102762  | 1.7567572  |
| O | 1.8634839  | 0.3764451  | -0.1264876 |
| P | 0.2891019  | 0.3779357  | 0.3499504  |
| O | -0.4290756 | 1.2005106  | -0.7371148 |
| O | -0.2433078 | -1.0002333 | 0.7104107  |
| C | 4.5576004  | 6.1260057  | 2.0043255  |
| C | 5.2908359  | 4.9308784  | 1.7829829  |
| H | 2.5911017  | 6.9982724  | 2.2484747  |
| H | 5.0836907  | 7.0906329  | 2.0687563  |
| H | 5.2222365  | 2.7918484  | 1.5312269  |
| H | 6.3838087  | 4.9740807  | 1.6599830  |
| C | 5.5175760  | 1.0985631  | 4.7707768  |
| C | 6.2952266  | -0.0675111 | 4.5412109  |
| H | 3.9138274  | 2.3634609  | 4.0821922  |
| H | 5.7072818  | 1.7156054  | 5.6622685  |
| H | 7.0953767  | -0.3422738 | 5.2452527  |
| H | 6.5986448  | -1.7932146 | 3.2689067  |
| C | -1.5679442 | 3.9884105  | 0.2559161  |
| C | -1.1078337 | 3.5239584  | 1.5237836  |
| C | -2.8768768 | 3.6603984  | -0.1399210 |
| C | -1.9836573 | 2.8096449  | 2.3838823  |
| C | -3.2850198 | 2.5135554  | 1.9410419  |
| C | -3.7438311 | 2.9049011  | 0.6723727  |
| C | -1.5580365 | 2.4026833  | 3.7924990  |
| H | -3.9456556 | 1.9389500  | 2.6055815  |
| C | -1.8581891 | 0.9321557  | 4.1197680  |
| H | -2.9474100 | 0.7262482  | 4.1610320  |
| H | -1.4371527 | 0.6643089  | 5.1107016  |
| H | -1.4243184 | 0.2511421  | 3.3633834  |
| C | -2.1934382 | 3.3544886  | 4.8253686  |
| H | -0.4592675 | 2.5413383  | 3.8622661  |
| H | -3.3009999 | 3.2784071  | 4.8066111  |
| H | -1.9269859 | 4.4112287  | 4.6195822  |
| H | -1.8544525 | 3.1056972  | 5.8525960  |
| C | -5.1445111 | 2.5726059  | 0.1678043  |
| C | -5.7850640 | 1.3642478  | 0.8650777  |
| H | -6.7173299 | 1.0595508  | 0.3463233  |
| H | -6.0647915 | 1.6028024  | 1.9123458  |
| H | -5.1055899 | 0.4878726  | 0.9095269  |
| C | -6.0629085 | 3.8073713  | 0.2560873  |
| H | -5.0281609 | 2.3322829  | -0.9147731 |
| H | -7.0650470 | 3.5925559  | -0.1706753 |
| H | -5.6343864 | 4.6710122  | -0.2903406 |
| H | -6.1995435 | 4.1139888  | 1.3142316  |
| C | -0.6983433 | 4.8327846  | -0.6766122 |
| C | -0.6235207 | 4.2999362  | -2.1151332 |
| H | 0.0688699  | 4.9233178  | -2.7176978 |
| H | -1.6068521 | 4.3071031  | -2.6265679 |
| H | -0.2451668 | 3.2593626  | -2.1295784 |
| C | -1.1705935 | 6.2996689  | -0.6500659 |
| H | 0.3359133  | 4.8145082  | -0.2814444 |
| H | -0.5110765 | 6.9393265  | -1.2729275 |
| H | -1.1744198 | 6.7084704  | 0.3812019  |
| H | -2.2040208 | 6.3920811  | -1.0453503 |
| H | 1.4347292  | -6.0105292 | -2.7305623 |
| H | 4.9590324  | -1.4391573 | -3.9566339 |
| H | 3.2978014  | -5.0919381 | 3.0367407  |
| C | 1.9557652  | -5.2083897 | -3.2991270 |
| H | 3.1197918  | 1.1472980  | -3.5646339 |
| H | 0.7150687  | -5.5509984 | -5.0722341 |



|    |            |            |            |
|----|------------|------------|------------|
| H  | 0.8832138  | -4.3018734 | 2.9713302  |
| C  | 2.3182914  | -4.1220643 | -2.2936690 |
| C  | 5.0828791  | -0.7860459 | -3.0675258 |
| C  | 0.9938694  | -4.7180228 | -4.3940292 |
| H  | 1.4547873  | -3.9259305 | -5.0199506 |
| C  | 2.7909683  | -2.8656191 | -2.7077532 |
| C  | 3.3871317  | -4.8866272 | 1.9499514  |
| H  | 3.9038533  | -6.2169588 | -3.1262006 |
| C  | 2.2315327  | -4.3625317 | -0.9129846 |
| C  | 3.2285047  | -5.8236608 | -3.9122370 |
| H  | 2.9782946  | -6.6559241 | -4.6027876 |
| H  | 1.8451427  | -5.3374193 | -0.5723577 |
| C  | 2.7240758  | 0.1618637  | -3.2433005 |
| H  | 5.5082561  | 0.1778040  | -3.4162320 |
| H  | 5.8251815  | -1.2677329 | -2.3991223 |
| C  | 3.1902629  | -1.8741911 | -1.7945132 |
| C  | 0.9772739  | -4.0822813 | 1.8882294  |
| C  | 2.6054626  | -3.4033281 | 0.0478592  |
| H  | 4.4452217  | -4.6331847 | 1.7350605  |
| H  | 3.1570493  | -5.8290897 | 1.4102507  |
| C  | 3.7426663  | -0.5597946 | -2.3426883 |
| C  | 3.1109023  | -2.1484750 | -0.4000904 |
| C  | 2.4365992  | -3.7509494 | 1.5286791  |
| H  | 1.7698280  | 0.3318138  | -2.7092239 |
| H  | 0.3186206  | -3.2217258 | 1.6632583  |
| H  | 2.5021708  | -0.4215772 | -4.1612122 |
| H  | 0.0634108  | -4.3062356 | -3.9564470 |
| H  | 0.5986765  | -4.9662912 | 1.3341436  |
| H  | 3.7953271  | -5.0629105 | -4.4889511 |
| H  | 3.9532531  | 0.1075232  | -1.4838235 |
| H  | 2.7091306  | -2.8549018 | 2.1198683  |
| H  | 2.8669627  | -2.6484625 | -3.7849332 |
| Zn | -1.7623420 | 0.7252709  | -2.0295026 |
| Br | -3.0670822 | 1.8428610  | -3.5904944 |
| C  | -6.1252711 | -3.8518941 | -1.7325829 |
| C  | -5.1089634 | -2.8966467 | -0.8192956 |
| C  | -5.3878890 | -1.6262448 | -1.3810401 |
| C  | -6.6915331 | -1.3346776 | -1.8568568 |
| C  | -7.7027279 | -2.2955945 | -1.7677870 |
| C  | -7.4173797 | -3.5531349 | -1.2035658 |
| H  | -5.9131896 | -4.8340504 | -0.2847917 |
| C  | -4.3829581 | -0.5840179 | -1.5059297 |
| H  | -6.8970858 | -0.3433635 | -2.2912954 |
| H  | -8.7156781 | -2.0696441 | -2.1324349 |
| H  | -8.2138622 | -4.3097587 | -1.1285360 |
| O  | -3.1938229 | -0.6637524 | -1.1252590 |
| C  | -2.7516278 | -3.9581880 | -3.1167810 |
| C  | -1.8494279 | -3.2924186 | -2.3306593 |
| C  | -1.5896574 | -2.0131957 | -3.0342616 |
| O  | -2.2760327 | -1.9471823 | -4.1910094 |
| C  | -3.0625317 | -3.1456978 | -4.3294344 |
| O  | -0.8942856 | -1.0614281 | -2.6458573 |
| C  | -1.2595071 | -3.5621368 | -1.0228732 |
| H  | -2.7829914 | -3.6338578 | -5.2900114 |
| H  | -4.1297910 | -2.8366059 | -4.4065452 |
| Zn | -1.8174888 | -2.2269330 | 0.3961804  |
| Br | -3.3662224 | -2.0317535 | 2.1454672  |
| H  | -0.1683367 | -3.3621242 | -1.0393919 |
| H  | -1.4423784 | -4.5998368 | -0.6840254 |
| H  | -4.1019605 | -3.1114533 | -0.4397785 |
| H  | -3.2045079 | -4.9378370 | -2.9139487 |
| H  | -4.7038429 | 0.3528657  | -2.0243078 |
| H  | -3.2291051 | 3.9806124  | -1.1337355 |

## int2-8-d; COSMO

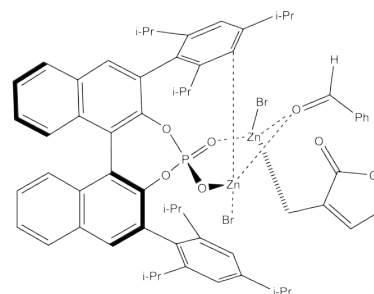

Energy(Hartree)= -11970.03548394

|   |            |            |            |
|---|------------|------------|------------|
| C | 1.2357456  | 2.4558403  | 1.5160017  |
| C | 2.6291479  | 2.4217229  | 1.4346286  |
| C | 3.3247451  | 3.6822141  | 1.3143076  |
| C | 4.7254841  | 3.7730292  | 1.0569791  |
| C | 2.5718604  | 4.9107376  | 1.4285886  |
| C | 3.2607176  | 6.1592158  | 1.3627385  |
| C | 1.1494450  | 4.8662141  | 1.5309421  |
| H | 0.5915879  | 5.8146418  | 1.5699444  |
| C | 0.4607238  | 3.6609441  | 1.5093910  |
| C | 3.5634014  | -1.1896581 | 0.4829905  |
| C | 4.6816896  | -1.3938950 | 1.2830278  |
| H | 5.2315456  | -2.3438238 | 1.2014150  |
| C | 5.1080519  | -0.4351503 | 2.2447962  |
| C | 6.1978712  | -0.7095422 | 3.1253269  |
| C | 4.3996384  | 0.8164156  | 2.3636017  |
| C | 4.7747278  | 1.7023801  | 3.4191255  |
| C | 3.3218319  | 1.1020691  | 1.4449643  |
| C | 2.9081210  | 0.0778620  | 0.5786148  |
| O | 0.5431735  | 1.2639124  | 1.6378538  |
| O | 1.8449737  | 0.2941334  | -0.2950630 |
| P | 0.3134756  | 0.3399054  | 0.2853727  |
| O | -0.4820665 | 1.1240687  | -0.7755732 |
| O | -0.2313033 | -0.9743912 | 0.8162203  |
| C | 4.6303780  | 6.2092836  | 1.1493790  |
| C | 5.3621360  | 5.0044514  | 0.9764257  |
| H | 2.6763580  | 7.0872539  | 1.4651435  |
| H | 5.1474466  | 7.1793142  | 1.0940203  |
| H | 5.3033244  | 2.8496784  | 0.9139050  |
| H | 6.4428420  | 5.0456043  | 0.7716384  |
| C | 5.8256958  | 1.3972889  | 4.2735844  |
| C | 6.5581813  | 0.1901523  | 4.1171626  |
| H | 4.2113339  | 2.6343441  | 3.5634285  |
| H | 6.0879189  | 2.0950761  | 5.0835390  |
| H | 7.3953495  | -0.0368186 | 4.7947506  |
| H | 6.7358768  | -1.6638250 | 3.0116460  |
| C | -1.5939688 | 3.8443933  | 0.0655556  |
| C | -1.0131885 | 3.4978524  | 1.3166240  |
| C | -2.9101787 | 3.3891824  | -0.2189844 |
| C | -1.7823722 | 2.7998540  | 2.2915753  |
| C | -3.0800914 | 2.3635639  | 1.9689310  |
| C | -3.6708076 | 2.6357509  | 0.7218350  |
| C | -1.2463097 | 2.5841270  | 3.7018669  |
| H | -3.6468076 | 1.7982514  | 2.7209228  |
| C | -1.4483700 | 1.1579006  | 4.2295572  |
| H | -2.5191562 | 0.9138538  | 4.3851625  |
| H | -0.9408824 | 1.0406552  | 5.2085856  |
| H | -1.0370179 | 0.4053492  | 3.5309316  |
| C | -1.8716949 | 3.6355280  | 4.6424675  |
| H | -0.1556333 | 2.7821528  | 3.6767503  |
| H | -2.9720688 | 3.5041705  | 4.7102143  |
| H | -1.6747955 | 4.6679176  | 4.2882044  |
| H | -1.4539487 | 3.5357870  | 5.6653262  |
| C | -5.1137267 | 2.2559301  | 0.3988967  |
| C | -5.6712548 | 1.1391421  | 1.2903853  |
| H | -6.6399825 | 0.7773603  | 0.8924154  |
| H | -5.8554874 | 1.5008636  | 2.3231297  |

|    |            |            |            |    |            |            |            |
|----|------------|------------|------------|----|------------|------------|------------|
| H  | -4.9805961 | 0.2760950  | 1.3564701  | O  | -1.4721216 | -1.4889685 | -3.9975090 |
| C  | -6.0134717 | 3.5079861  | 0.4536392  | C  | -2.7623877 | -2.0535255 | -4.2598123 |
| H  | -5.1223923 | 1.9014759  | -0.6585148 | O  | -0.0047757 | -1.4687871 | -2.2702986 |
| H  | -7.0544282 | 3.2494982  | 0.1717044  | C  | -1.8565370 | -3.3604842 | -0.8293763 |
| H  | -5.6598161 | 4.3005957  | -0.2353939 | H  | -2.6945492 | -2.7060393 | -5.1602414 |
| H  | -6.0299800 | 3.9301765  | 1.4799871  | H  | -3.4599764 | -1.2193737 | -4.5001110 |
| C  | -0.8686487 | 4.7134419  | -0.9572524 | Zn | -1.9640512 | -1.9889483 | 0.6774190  |
| C  | -0.8491470 | 4.1377780  | -2.3800155 | Br | -2.7744755 | -2.0680074 | 2.9080827  |
| H  | -0.2381174 | 4.7884774  | -3.0380128 | H  | -0.7884342 | -3.6292514 | -0.6854767 |
| H  | -1.8599818 | 4.0711977  | -2.8298118 | H  | -2.5272554 | -4.2081141 | -0.5968922 |
| H  | -0.3981089 | 3.1252440  | -2.3947346 | H  | -4.5577634 | -2.3244361 | 1.1256531  |
| C  | -1.4603174 | 6.1373170  | -0.9321109 | H  | -4.0312874 | -3.4290178 | -2.9352049 |
| H  | 0.1867354  | 4.7885800  | -0.6334507 | H  | -4.3898209 | -0.3941701 | -2.2373562 |
| H  | -0.8958652 | 6.8027425  | -1.6169895 | H  | -3.4042003 | 3.7350230  | -1.1422853 |
| H  | -1.4242061 | 6.5778863  | 0.0851293  |    |            |            |            |
| H  | -2.5212450 | 6.1366416  | -1.2596063 |    |            |            |            |
| H  | 1.2651753  | -6.2478422 | -2.4343120 |    |            |            |            |
| H  | 5.0461078  | -1.9982824 | -3.9418017 |    |            |            |            |
| H  | 3.2112228  | -4.7766455 | 3.2433754  |    |            |            |            |
| C  | 1.5914369  | -5.4049233 | -3.0830368 |    |            |            |            |
| H  | 3.3637159  | 0.7544983  | -3.8345052 |    |            |            |            |
| H  | -0.0056175 | -5.7393614 | -4.5545795 |    |            |            |            |
| H  | 0.7667113  | -4.1077875 | 3.1403822  |    |            |            |            |
| C  | 2.1042132  | -4.3077376 | -2.1573150 |    |            |            |            |
| C  | 5.1822919  | -1.2691190 | -3.1154539 |    |            |            |            |
| C  | 0.3613065  | -4.9356404 | -3.8823641 |    |            |            |            |
| H  | 0.6017152  | -4.0510524 | -4.5087561 |    |            |            |            |
| C  | 2.7055784  | -3.1462492 | -2.6703381 |    |            |            |            |
| C  | 3.2886896  | -4.6614763 | 2.1421445  |    |            |            |            |
| H  | 3.5740558  | -6.2891510 | -3.4388729 |    |            |            |            |
| C  | 1.9738824  | -4.4173035 | -0.7630465 |    |            |            |            |
| C  | 2.6942151  | -5.9372626 | -4.0147795 |    |            |            |            |
| H  | 2.3196241  | -6.7848602 | -4.6255176 |    |            |            |            |
| H  | 1.5014790  | -5.3229673 | -0.3480742 |    |            |            |            |
| C  | 2.9004498  | -0.1874751 | -3.4737156 |    |            |            |            |
| H  | 5.6813974  | -0.3718581 | -3.5375057 |    |            |            |            |
| H  | 5.8681697  | -1.7274451 | -2.3736185 |    |            |            |            |
| C  | 3.1728109  | -2.1155037 | -1.8387582 |    |            |            |            |
| C  | 0.8420810  | -4.0179810 | 2.0375157  |    |            |            |            |
| C  | 2.4266932  | -3.4157428 | 0.1182426  |    |            |            |            |
| H  | 4.3306560  | -4.3699650 | 1.9007214  |    |            |            |            |
| H  | 3.1082151  | -5.6563935 | 1.6832764  |    |            |            |            |
| C  | 3.8330486  | -0.8940857 | -2.4742413 |    |            |            |            |
| C  | 3.0436061  | -2.2564250 | -0.4302449 |    |            |            |            |
| C  | 2.2703486  | -3.6263153 | 1.6256444  |    |            |            |            |
| H  | 1.9239140  | 0.0424000  | -3.0073610 |    |            |            |            |
| H  | 0.1167742  | -3.2464434 | 1.7220712  |    |            |            |            |
| H  | 2.7031727  | -0.8223015 | -4.3629872 |    |            |            |            |
| H  | -0.4683773 | -4.6490473 | -3.2069364 |    |            |            |            |
| H  | 0.5296066  | -4.9909137 | 1.6046683  |    |            |            |            |
| H  | 3.0442322  | -5.1523047 | -4.7172586 |    |            |            |            |
| H  | 4.0545053  | -0.1692656 | -1.6648967 |    |            |            |            |
| H  | 2.4907734  | -2.6598252 | 2.1228838  |    |            |            |            |
| H  | 2.8066432  | -3.0296187 | -3.7609770 |    |            |            |            |
| Zn | -2.3470432 | 1.3005842  | -1.2166535 |    |            |            |            |
| Br | -3.3363205 | 1.6055906  | -3.3428620 |    |            |            |            |
| C  | -6.3535626 | -3.4331090 | 0.6346628  |    |            |            |            |
| C  | -5.3267153 | -2.5223046 | 0.3625136  |    |            |            |            |
| C  | -5.2959134 | -1.8466873 | -0.8816530 |    |            |            |            |
| C  | -6.3274502 | -2.0816514 | -1.8311977 |    |            |            |            |
| C  | -7.3535315 | -2.9848331 | -1.5482316 |    |            |            |            |
| C  | -7.3632211 | -3.6682328 | -0.3153188 |    |            |            |            |
| H  | -6.3683650 | -3.9574368 | 1.6020089  |    |            |            |            |
| C  | -4.2667086 | -0.8945069 | -1.2512831 |    |            |            |            |
| H  | -6.3062754 | -1.5476118 | -2.7947432 |    |            |            |            |
| H  | -8.1510010 | -3.1630553 | -2.2849982 |    |            |            |            |
| H  | -8.1700276 | -4.3838257 | -0.0934906 |    |            |            |            |
| O  | -3.3131583 | -0.4935747 | -0.5053044 |    |            |            |            |
| C  | -3.1207026 | -2.8221815 | -3.0236108 |    |            |            |            |
| C  | -2.0742762 | -2.7777733 | -2.1387683 |    |            |            |            |
| C  | -1.0504144 | -1.8605182 | -2.7454995 |    |            |            |            |

int2-8-d

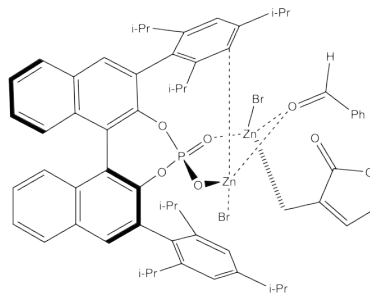

Energy(Hartree)=-11970.02381127

|   |            |            |            |
|---|------------|------------|------------|
| C | 1.2364073  | 2.4573796  | 1.5085123  |
| C | 2.6298061  | 2.4261721  | 1.4248101  |
| C | 3.3225640  | 3.6883077  | 1.3066700  |
| C | 4.7223199  | 3.7818552  | 1.0463374  |
| C | 2.5686589  | 4.9153469  | 1.4272574  |
| C | 3.2562522  | 6.1641365  | 1.3642108  |
| C | 1.1469524  | 4.8676866  | 1.5339086  |
| H | 0.5867685  | 5.8146142  | 1.5783453  |
| C | 0.4599155  | 3.6617230  | 1.5093910  |
| C | 3.5643526  | -1.1857482 | 0.4766789  |
| C | 4.6837057  | -1.3875279 | 1.2754220  |
| H | 5.2313551  | -2.3387779 | 1.1946407  |
| C | 5.1126995  | -0.4268075 | 2.2334678  |
| C | 6.2041137  | -0.6982872 | 3.1120944  |
| C | 4.4043363  | 0.8246317  | 2.3508069  |
| C | 4.7813533  | 1.7124146  | 3.4037640  |
| C | 3.3249201  | 1.1080301  | 1.4333933  |
| C | 2.9102454  | 0.0824761  | 0.5692123  |
| O | 0.5447890  | 1.2656795  | 1.6271617  |
| O | 1.8470084  | 0.2975520  | -0.3047313 |
| P | 0.3157716  | 0.3418428  | 0.2745584  |
| O | -0.4815330 | 1.1269568  | -0.7854380 |
| O | -0.2310190 | -0.9727399 | 0.8019924  |
| C | 4.6247996  | 6.2168213  | 1.1478926  |
| C | 5.3571509  | 5.0138846  | 0.9689991  |
| H | 2.6710698  | 7.0911531  | 1.4714032  |
| H | 5.1403852  | 7.1877162  | 1.0948882  |
| H | 5.2996305  | 2.8589197  | 0.8993185  |
| H | 6.4372829  | 5.0568253  | 0.7618979  |
| C | 5.8344875  | 1.4099565  | 4.2557717  |
| C | 6.5668543  | 0.2033551  | 4.1004750  |
| H | 4.2173544  | 2.6440228  | 3.5470340  |
| H | 6.0981295  | 2.1097786  | 5.0634370  |
| H | 7.4056910  | -0.0219858 | 4.7764458  |
| H | 6.7415164  | -1.6530055 | 2.9994910  |
| C | -1.6007950 | 3.8445029  | 0.0742880  |
| C | -1.0141438 | 3.4955514  | 1.3218343  |
| C | -2.9154898 | 3.3849456  | -0.2068931 |

|   |            |            |            |    |            |            |            |
|---|------------|------------|------------|----|------------|------------|------------|
| C | -1.7757744 | 2.7883028  | 2.2961083  | H  | 2.8099200  | -3.0465499 | -3.7565583 |
| C | -3.0711039 | 2.3446240  | 1.9746942  | Zn | -2.3431688 | 1.2936620  | -1.2359388 |
| C | -3.6674150 | 2.6208976  | 0.7312366  | Br | -3.3731056 | 1.6330007  | -3.3327521 |
| C | -1.2338267 | 2.5703652  | 3.7041050  | C  | -6.3835009 | -3.4195849 | 0.5972314  |
| H | -3.6293708 | 1.7669085  | 2.7236073  | C  | -5.3399168 | -2.5266529 | 0.3272261  |
| C | -1.4189901 | 1.1404079  | 4.2275631  | C  | -5.2997650 | -1.8452644 | -0.9127803 |
| H | -2.4862221 | 0.8798558  | 4.3793920  | C  | -6.3386189 | -2.0569625 | -1.8593104 |
| H | -0.9130120 | 1.0269560  | 5.2076859  | C  | -7.3809612 | -2.9416084 | -1.5781050 |
| H | -0.9947360 | 0.3944497  | 3.5300010  | C  | -7.4003771 | -3.6314161 | -0.3491292 |
| C | -1.8670670 | 3.6118186  | 4.6504399  | H  | -6.4029420 | -3.9467248 | 1.5629930  |
| H | -0.1453280 | 2.7801733  | 3.6763384  | C  | -4.2544236 | -0.9062480 | -1.2809581 |
| H | -2.9656921 | 3.4687975  | 4.7218074  | H  | -6.3100740 | -1.5166166 | -2.8193295 |
| H | -1.6832456 | 4.6477406  | 4.2996260  | H  | -8.1844674 | -3.0997540 | -2.3130708 |
| H | -1.4457622 | 3.5133556  | 5.6719168  | H  | -8.2201934 | -4.3325117 | -0.1285215 |
| C | -5.1080134 | 2.2308823  | 0.4092467  | O  | -3.3097534 | -0.5035170 | -0.5235408 |
| C | -5.6543744 | 1.1049030  | 1.2959976  | C  | -3.1147873 | -2.7884332 | -3.0040501 |
| H | -6.6197593 | 0.7344541  | 0.8976087  | C  | -2.0612718 | -2.7677668 | -2.1235505 |
| H | -5.8425887 | 1.4601958  | 2.3302847  | C  | -1.0279373 | -1.8567501 | -2.7286800 |
| H | -4.9555692 | 0.2483888  | 1.3604818  | O  | -1.4504195 | -1.4707781 | -3.9749055 |
| C | -6.0183929 | 3.4746598  | 0.4711495  | C  | -2.7444213 | -2.0203543 | -4.2392054 |
| H | -5.1144202 | 1.8818920  | -0.6500270 | O  | 0.0230554  | -1.4832449 | -2.2529070 |
| H | -7.0581080 | 3.2101239  | 0.1899820  | C  | -1.8462487 | -3.3532494 | -0.8201977 |
| H | -5.6729900 | 4.2740029  | -0.2142122 | H  | -2.6804363 | -2.6735806 | -5.1401180 |
| H | -6.0370390 | 3.8926237  | 1.4991565  | H  | -3.4306287 | -1.1769295 | -4.4808568 |
| C | -0.8814847 | 4.7182790  | -0.9492775 | Zn | -1.9759852 | -1.9685153 | 0.6864268  |
| C | -0.8552241 | 4.1403331  | -2.3711102 | Br | -2.8310329 | -2.0259849 | 2.8879574  |
| H | -0.2515995 | 4.7960776  | -3.0309397 | H  | -0.7767757 | -3.6048725 | -0.6602606 |
| H | -1.8643312 | 4.0600720  | -2.8224212 | H  | -2.5155631 | -4.1999230 | -0.5820292 |
| H | -0.3916585 | 3.1336188  | -2.3844782 | H  | -4.5670652 | -2.3471540 | 1.0917747  |
| C | -1.4835678 | 6.1376050  | -0.9268702 | H  | -4.0260141 | -3.3947959 | -2.9212066 |
| H | 0.1728135  | 4.8020652  | -0.6239289 | H  | -4.3711048 | -0.4001600 | -2.2645618 |
| H | -0.9236819 | 6.8076333  | -1.6110410 | H  | -3.4126076 | 3.7271865  | -1.1297388 |
| H | -1.4539756 | 6.5795283  | 0.0900342  |    |            |            |            |
| H | -2.5437797 | 6.1299532  | -1.2565021 |    |            |            |            |
| H | 1.2645179  | -6.2560889 | -2.4150101 |    |            |            |            |
| H | 5.0667775  | -2.0281427 | -3.9246080 |    |            |            |            |
| H | 3.2056330  | -4.7594274 | 3.2542103  |    |            |            |            |
| C | 1.5868680  | -5.4144591 | -3.0675812 |    |            |            |            |
| H | 3.3868742  | 0.7301171  | -3.8582832 |    |            |            |            |
| H | -0.0155000 | -5.7529419 | -4.5333652 |    |            |            |            |
| H | 0.7633337  | -4.0862804 | 3.1514263  |    |            |            |            |
| C | 2.1020790  | -4.3140970 | -2.1470300 |    |            |            |            |
| C | 5.1959300  | -1.2905722 | -3.1047816 |    |            |            |            |
| C | 0.3523112  | -4.9486762 | -3.8621977 |    |            |            |            |
| H | 0.5879455  | -4.0631560 | -4.4890270 |    |            |            |            |
| C | 2.7069459  | -3.1573800 | -2.6655969 |    |            |            |            |
| C | 3.2809287  | -4.6500019 | 2.1523320  |    |            |            |            |
| H | 3.5695160  | -6.2946891 | -3.4295755 |    |            |            |            |
| C | 1.9694373  | -4.4156819 | -0.7526726 |    |            |            |            |
| C | 2.6857071  | -5.9486808 | -4.0024643 |    |            |            |            |
| H | 2.3107502  | -6.7999719 | -4.6077667 |    |            |            |            |
| H | 1.4956563  | -5.3185718 | -0.3332383 |    |            |            |            |
| C | 2.9192451  | -0.2081149 | -3.4940171 |    |            |            |            |
| H | 5.7001606  | -0.3985560 | -3.5316359 |    |            |            |            |
| H | 5.8741490  | -1.7427285 | -2.3524668 |    |            |            |            |
| C | 3.1752981  | -2.1231476 | -1.8395604 |    |            |            |            |
| C | 0.8370354  | -3.9967931 | 2.0486317  |    |            |            |            |
| C | 2.4229775  | -3.4106525 | 0.1237292  |    |            |            |            |
| H | 4.3236239  | -4.3648774 | 1.9068976  |    |            |            |            |
| H | 3.0963172  | -5.6465031 | 1.6989074  |    |            |            |            |
| C | 3.8412547  | -0.9076138 | -2.4801196 |    |            |            |            |
| C | 3.0428978  | -2.2561217 | -0.4309601 |    |            |            |            |
| C | 2.2661915  | -3.6131936 | 1.6323266  |    |            |            |            |
| H | 1.9387259  | 0.0287221  | -3.0399557 |    |            |            |            |
| H | 0.1147235  | -3.2211874 | 1.7366890  |    |            |            |            |
| H | 2.7281052  | -0.8484315 | -4.3805443 |    |            |            |            |
| H | -0.4754624 | -4.6646640 | -3.1833637 |    |            |            |            |
| H | 0.5173214  | -4.9680206 | 1.6172564  |    |            |            |            |
| H | 3.0307015  | -5.1666232 | -4.7104022 |    |            |            |            |
| H | 4.0563763  | -0.1760431 | -1.6750950 |    |            |            |            |
| H | 2.4911641  | -2.6455283 | 2.1252021  |    |            |            |            |

### 7.2.1.2 to 15r-mi TS1-8-r; COSMO

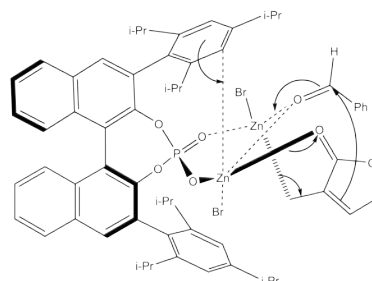

Energy(Hartree)= -11970.03403416

|    |            |            |            |
|----|------------|------------|------------|
| C  | -7.0927571 | 2.0250252  | -3.7663908 |
| C  | -3.0176090 | 2.2091702  | -2.4678265 |
| C  | -6.2146815 | 3.0069927  | -4.2664704 |
| C  | -5.3089038 | 1.1273876  | -2.3731057 |
| C  | -4.4155968 | 2.0986437  | -2.8801055 |
| C  | -6.6355550 | 1.0908608  | -2.8215743 |
| C  | -4.8875702 | 3.0418374  | -3.8311214 |
| O  | -2.5211770 | 1.6397135  | -1.4049465 |
| H  | -8.1378365 | 1.9953937  | -4.1111162 |
| H  | -4.9800079 | 0.4062393  | -1.6099386 |
| H  | -6.5728001 | 3.7479639  | -4.9971233 |
| H  | -7.3193444 | 0.3285822  | -2.4181836 |
| H  | -4.1971847 | 3.8070049  | -4.2214261 |
| Br | -4.3567340 | -1.3024848 | 0.2016883  |
| Zn | -2.5522268 | -0.5088996 | -1.0973315 |
| H  | -0.8099121 | 1.9156412  | -5.9877298 |
| H  | -1.4257023 | -1.8334642 | -2.8344280 |
| C  | -2.1325737 | 1.1526648  | -4.4320503 |
| C  | -1.0069809 | 2.0366457  | -4.8982243 |

|   |            |            |            |    |            |            |            |
|---|------------|------------|------------|----|------------|------------|------------|
| H | -3.1017290 | 1.1274681  | -4.9455812 | C  | 1.2783269  | 4.2135761  | 2.1426242  |
| C | -1.5876783 | 0.1045743  | -3.6970971 | C  | 1.8298037  | 4.4371661  | 0.7275039  |
| C | -2.1586219 | -1.0440692 | -3.0909706 | H  | 2.8514734  | 4.8642665  | 0.7875450  |
| C | -0.1503946 | 0.4793889  | -3.4373521 | H  | 1.2125667  | 5.1404446  | 0.1335440  |
| O | 0.1491523  | 1.5972621  | -4.1676816 | H  | 1.8941326  | 3.4817502  | 0.1693492  |
| O | 0.6565817  | -0.0690238 | -2.7184406 | C  | 1.2164731  | 5.5314967  | 2.9405640  |
| H | -1.1435899 | 3.1209036  | -4.6951230 | H  | 1.9970392  | 3.5496063  | 2.6589692  |
| H | -3.1191007 | -1.4045194 | -3.4977827 | H  | 2.2179964  | 6.0067134  | 2.9807419  |
| C | 1.0731657  | 0.3403175  | 2.9145564  | H  | 0.8718558  | 5.3639815  | 3.9815929  |
| C | 2.2369070  | -0.4064740 | 3.1056084  | H  | 0.5183969  | 6.2546663  | 2.4688414  |
| C | 3.2556687  | 0.1514042  | 3.9649002  | H  | 0.1702382  | -4.0134570 | -5.5349149 |
| C | 4.5526796  | -0.4266812 | 4.1054673  | H  | 5.3772348  | -2.4386364 | -3.2887897 |
| C | 2.9668437  | 1.3643911  | 4.6960298  | H  | -0.4977025 | -6.5903112 | 0.0300588  |
| C | 3.9496209  | 1.8919081  | 5.5867659  | C  | 1.0224370  | -3.3056511 | -5.4318863 |
| C | 1.7417522  | 2.0590611  | 4.4667820  | H  | 4.8806162  | 0.3705402  | -1.7928627 |
| H | 1.5617442  | 3.0053001  | 5.0000842  | H  | 0.3096030  | -1.9957702 | -7.0459126 |
| C | 0.8166596  | 1.6047745  | 3.5364309  | H  | -2.2042304 | -4.7264581 | -0.0754542 |
| C | 2.3075924  | -3.0234776 | 0.2807266  | C  | 1.3618390  | -3.2353829 | -3.9474037 |
| C | 2.7667180  | -4.1415241 | 0.9673415  | C  | 5.3334068  | -2.3755945 | -2.1810700 |
| H | 2.9466413  | -5.0739916 | 0.4108972  | C  | 0.5530858  | -1.9383029 | -5.9643936 |
| C | 2.9573041  | -4.1361317 | 2.3776201  | H  | 1.3383622  | -1.1647663 | -5.8322173 |
| C | 3.3326875  | -5.3244496 | 3.0742269  | C  | 2.4868464  | -2.5279877 | -3.4915898 |
| C | 2.7204603  | -2.9230729 | 3.1223811  | C  | 0.1287731  | -6.0569433 | -0.7149077 |
| C | 2.7945044  | -2.9859830 | 4.5473274  | H  | 2.5199072  | -4.8491958 | -5.8927523 |
| C | 2.3800969  | -1.7148897 | 2.4062151  | C  | 0.5462707  | -3.8588088 | -2.9884751 |
| C | 2.1379212  | -1.8158998 | 1.0271789  | C  | 2.1888673  | -3.8598108 | -6.2682322 |
| O | 0.0782069  | -0.1685700 | 2.0962174  | H  | 1.8919679  | -3.9754307 | -7.3312777 |
| O | 1.7720309  | -0.6838795 | 0.2986465  | H  | -0.3391426 | -4.4179697 | -3.3338641 |
| P | 0.2680396  | -0.0595278 | 0.4600904  | C  | 4.0132946  | -0.1938573 | -2.1944658 |
| O | 0.3962380  | 1.4087942  | 0.0119985  | H  | 6.2396919  | -1.8333413 | -1.8391905 |
| O | -0.8613345 | -0.9074250 | -0.1059901 | H  | 5.3813356  | -3.4104255 | -1.7841663 |
| C | 5.1875955  | 1.2822059  | 5.7269809  | C  | 2.8074712  | -2.4308287 | -2.1277796 |
| C | 5.4947259  | 0.1243784  | 4.9640258  | C  | -1.5844421 | -4.1934575 | -0.8250890 |
| H | 3.7112062  | 2.8092575  | 6.1477948  | C  | 0.8226325  | -3.7981043 | -1.6083231 |
| H | 5.9385571  | 1.7041706  | 6.4120884  | H  | 1.1878858  | -6.3255641 | -0.5271091 |
| H | 4.8067524  | -1.3185983 | 3.5163908  | H  | -0.1378076 | -6.4435371 | -1.7211520 |
| H | 6.4897198  | -0.3385094 | 5.0491754  | C  | 4.0553039  | -1.6549147 | -1.7131844 |
| C | 3.1408885  | -4.1628010 | 5.1974179  | C  | 1.9740321  | -3.0807129 | -1.1778074 |
| C | 3.4320029  | -5.3397538 | 4.4571691  | C  | -0.0979087 | -4.5347159 | -0.6329590 |
| H | 2.5599461  | -2.0897632 | 5.1375714  | H  | 3.0779752  | 0.3012007  | -1.8719618 |
| H | 3.1827445  | -4.1840269 | 6.2971791  | H  | -1.7634601 | -3.1119057 | -0.6871752 |
| H | 3.7149561  | -6.2643356 | 4.9830701  | H  | 4.0582970  | -0.1294822 | -3.3019176 |
| H | 3.5233156  | -6.2373017 | 2.4882258  | H  | -0.3517983 | -1.5909958 | -5.4280506 |
| C | -0.0836836 | 3.5273061  | 2.1853924  | H  | -1.9581130 | -4.4869705 | -1.8281503 |
| C | -0.3376415 | 2.3851973  | 2.9940839  | H  | 3.0656722  | -3.1796166 | -6.2417880 |
| C | -1.1517447 | 4.0625227  | 1.4167852  | H  | 4.0874199  | -1.6335825 | -0.6049683 |
| C | -1.6593623 | 1.8628241  | 3.0963965  | H  | 0.1724045  | -4.2101586 | 0.3923247  |
| C | -2.6869003 | 2.4186115  | 2.3134672  | Zn | -0.8820789 | 2.7350989  | -0.5766085 |
| C | -2.4655754 | 3.5144110  | 1.4583664  | Br | -0.5433881 | 4.5229630  | -2.0887507 |
| H | -0.9869436 | 4.9983379  | 0.8579753  | H  | 3.1345102  | -2.0186634 | -4.2225398 |
| C | -1.9905340 | 0.7587363  | 4.0940263  | H  | -2.4714772 | 3.0956212  | -2.8459606 |
| H | -3.6934968 | 1.9845617  | 2.3813359  |    |            |            |            |
| C | -2.8489118 | -0.3686616 | 3.5055431  |    |            |            |            |
| H | -3.8687713 | -0.0257011 | 3.2362313  |    |            |            |            |
| H | -2.9645240 | -1.1850829 | 4.2471332  |    |            |            |            |
| H | -2.3907733 | -0.7918454 | 2.5919958  |    |            |            |            |
| C | -2.6504932 | 1.3874340  | 5.3390730  |    |            |            |            |
| H | -1.0316920 | 0.3127845  | 4.4278186  |    |            |            |            |
| H | -3.6188747 | 1.8635774  | 5.0780520  |    |            |            |            |
| H | -2.0031888 | 2.1640990  | 5.7949019  |    |            |            |            |
| H | -2.8498073 | 0.6102666  | 6.1052190  |    |            |            |            |
| C | -3.5945675 | 4.1905333  | 0.6838820  |    |            |            |            |
| C | -4.8334006 | 3.3052740  | 0.5053064  |    |            |            |            |
| H | -5.5353932 | 3.7667569  | -0.2170083 |    |            |            |            |
| H | -5.3814308 | 3.1770353  | 1.4617568  |    |            |            |            |
| H | -4.5691790 | 2.2985735  | 0.1286609  |    |            |            |            |
| C | -3.9627224 | 5.5311887  | 1.3524813  |    |            |            |            |
| H | -3.1890299 | 4.4353851  | -0.3254959 |    |            |            |            |
| H | -4.7487161 | 6.0515597  | 0.7683181  |    |            |            |            |
| H | -3.0889350 | 6.2085546  | 1.4283170  |    |            |            |            |
| H | -4.3525346 | 5.3606545  | 2.3776645  |    |            |            |            |

### TS1-8-r

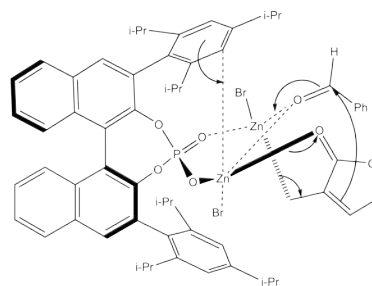

Energy(Hartree)= -11970.02296021  
number of imaginary frequencies: 1

|   |            |           |            |
|---|------------|-----------|------------|
| C | -7.0850310 | 2.0182014 | -3.7939886 |
| C | -3.0174193 | 2.2163456 | -2.4691820 |
| C | -6.2066468 | 3.0018423 | -4.2892881 |
| C | -5.3076499 | 1.1279592 | -2.3872564 |

|    |            |            |            |    |            |            |            |
|----|------------|------------|------------|----|------------|------------|------------|
| C  | -4.4137179 | 2.1004550  | -2.8899507 | C  | -2.6416406 | 1.3793995  | 5.3452910  |
| C  | -6.6310672 | 1.0877427  | -2.8449397 | H  | -1.0193586 | 0.3123905  | 4.4317087  |
| C  | -4.8829990 | 3.0409808  | -3.8447089 | H  | -3.6123353 | 1.8516385  | 5.0860886  |
| O  | -2.5237699 | 1.6468637  | -1.4072004 | H  | -1.9976912 | 2.1589773  | 5.8007772  |
| H  | -8.1276603 | 1.9850963  | -4.1457999 | H  | -2.8375486 | 0.6018150  | 6.1118387  |
| H  | -4.9836721 | 0.4087233  | -1.6194386 | C  | -3.6005152 | 4.1785200  | 0.6891276  |
| H  | -6.5621814 | 3.7410977  | -5.0229989 | C  | -4.8348693 | 3.2869262  | 0.5104466  |
| H  | -7.3139046 | 0.3238167  | -2.4431760 | H  | -5.5385970 | 3.7424965  | -0.2140100 |
| H  | -4.1918010 | 3.8086605  | -4.2289042 | H  | -5.3843712 | 3.1585331  | 1.4660534  |
| Br | -4.3722273 | -1.2555123 | 0.2125739  | H  | -4.5665980 | 2.2796597  | 0.1382655  |
| Zn | -2.5604403 | -0.5075254 | -1.0895421 | C  | -3.9762962 | 5.5190773  | 1.3532897  |
| H  | -0.7708648 | 1.9304660  | -5.9617938 | H  | -3.1936874 | 4.4229133  | -0.3198835 |
| H  | -1.4428583 | -1.8345599 | -2.8289035 | H  | -4.7639030 | 6.0351228  | 0.7674006  |
| C  | -2.1146633 | 1.1615781  | -4.4242536 | H  | -3.1062104 | 6.2010933  | 1.4291663  |
| C  | -0.9757118 | 2.0402826  | -4.8718423 | H  | -4.3667255 | 5.3502040  | 2.3784733  |
| H  | -3.0810222 | 1.1493427  | -4.9434246 | C  | 1.2742147  | 4.2190035  | 2.1416180  |
| C  | -1.5856663 | 0.1056017  | -3.6885160 | C  | 1.8217305  | 4.4411069  | 0.7246575  |
| C  | -2.1680366 | -1.0383707 | -3.0865164 | H  | 2.8431599  | 4.8693105  | 0.7806930  |
| C  | -0.1450022 | 0.4642566  | -3.4194274 | H  | 1.2033005  | 5.1420928  | 0.1292785  |
| O  | 0.1698795  | 1.5836188  | -4.1403480 | H  | 1.8872286  | 3.4850950  | 0.1679567  |
| O  | 0.6507676  | -0.0994960 | -2.7010235 | C  | 1.2134932  | 5.5375730  | 2.9383179  |
| H  | -1.1036430 | 3.1235017  | -4.6555953 | H  | 1.9946955  | 3.5560726  | 2.6570209  |
| H  | -3.1312431 | -1.3899609 | -3.4943339 | H  | 2.2140158  | 6.0151727  | 2.9754044  |
| C  | 1.0771657  | 0.3457279  | 2.9119006  | H  | 0.8713558  | 5.3716621  | 3.9804447  |
| C  | 2.2404790  | -0.4020207 | 3.1021165  | H  | 0.5133571  | 6.2599290  | 2.4685171  |
| C  | 3.2598995  | 0.1546694  | 3.9612178  | H  | 0.1661302  | -4.0152046 | -5.5345332 |
| C  | 4.5561322  | -0.4248841 | 4.1006709  | H  | 5.3732178  | -2.4486077 | -3.2901397 |
| C  | 2.9729776  | 1.3671250  | 4.6936454  | H  | -0.5074115 | -6.5836003 | 0.0323607  |
| C  | 3.9570327  | 1.8919437  | 5.5838281  | C  | 1.0181930  | -3.3069518 | -5.4319601 |
| C  | 1.7479834  | 2.0620115  | 4.4660985  | H  | 4.8852615  | 0.3653942  | -1.7981100 |
| H  | 1.5680295  | 3.0079166  | 5.0001762  | H  | 0.3046198  | -1.9975109 | -7.0467489 |
| C  | 0.8217712  | 1.6092842  | 3.5364144  | H  | -2.2117889 | -4.7155245 | -0.0726417 |
| C  | 2.3037407  | -3.0204686 | 0.2788324  | C  | 1.3574687  | -3.2357527 | -3.9475347 |
| C  | 2.7613278  | -4.1383191 | 0.9662649  | C  | 5.3292984  | -2.3831024 | -2.1826941 |
| H  | 2.9381891  | -5.0708521 | 0.4090074  | C  | 0.5480359  | -1.9401881 | -5.9651471 |
| C  | 2.9537330  | -4.1327662 | 2.3759434  | H  | 1.3325569  | -1.1659704 | -5.8329094 |
| C  | 3.3273379  | -5.3205434 | 3.0733671  | C  | 2.4830068  | -2.5293701 | -3.4926895 |
| C  | 2.7207832  | -2.9186701 | 3.1197514  | C  | 0.1192347  | -6.0512930 | -0.7130884 |
| C  | 2.7973271  | -2.9806042 | 4.5443417  | H  | 2.5157716  | -4.8502400 | -5.8906516 |
| C  | 2.3815080  | -1.7106398 | 2.4030082  | C  | 0.5411550  | -3.8568087 | -2.9882138 |
| C  | 2.1367754  | -1.8120107 | 1.0244513  | C  | 2.1843056  | -3.8619385 | -6.2678348 |
| O  | 0.0812240  | -0.1600734 | 2.0950377  | H  | 1.8884518  | -3.9788287 | -7.3310163 |
| O  | 1.7703941  | -0.6809063 | 0.2959141  | H  | -0.3444275 | -4.4160945 | -3.3329647 |
| P  | 0.2673621  | -0.0553091 | 0.4577925  | C  | 4.0164784  | -0.1968037 | -2.1991654 |
| O  | 0.3963559  | 1.4123750  | 0.0061769  | H  | 6.2375009  | -1.8433098 | -1.8422488 |
| O  | -0.8652867 | -0.9019773 | -0.1026415 | H  | 5.3738547  | -3.4174936 | -1.7847536 |
| C  | 5.1939160  | 1.2810016  | 5.7229928  | C  | 2.8041049  | -2.4309964 | -2.1294158 |
| C  | 5.4989264  | 0.1239225  | 4.9591001  | C  | -1.5908623 | -4.1853660 | -0.8229783 |
| H  | 3.7200715  | 2.8090827  | 6.1458784  | C  | 0.8171049  | -3.7948431 | -1.6083859 |
| H  | 5.9455924  | 1.7015696  | 6.4080973  | H  | 1.1779434  | -6.3219399 | -0.5265743 |
| H  | 4.8073375  | -1.3167159 | 3.5104428  | H  | -0.1478317 | -6.4384845 | -1.7188240 |
| H  | 6.4932338  | -0.3404815 | 5.0432456  | C  | 4.0537062  | -1.6573162 | -1.7161092 |
| C  | 3.1424001  | -4.1571247 | 5.1947495  | C  | 1.9695799  | -3.0786880 | -1.1792752 |
| C  | 3.4292558  | -5.3350445 | 4.4555817  | C  | -0.1047188 | -4.5287251 | -0.6320285 |
| H  | 2.5657060  | -2.0829581 | 5.1333894  | H  | 3.0838688  | 0.3037339  | -1.8779147 |
| H  | 3.1862946  | -4.1770949 | 6.2944043  | H  | -1.7688299 | -3.1037580 | -0.6850374 |
| H  | 3.7109295  | -6.2598553 | 4.9816484  | H  | 4.0624994  | -0.1326077 | -3.3064872 |
| H  | 3.5143097  | -6.2343796 | 2.4877611  | H  | -0.3570506 | -1.5933189 | -5.4288602 |
| C  | -0.0869893 | 3.5308552  | 2.1895380  | H  | -1.9666790 | -4.4791334 | -1.8251555 |
| C  | -0.3356435 | 2.3877747  | 2.9983250  | H  | 3.0613441  | -3.1822560 | -6.2419329 |
| C  | -1.1580571 | 4.0626670  | 1.4236448  | H  | 4.0859680  | -1.6346142 | -0.6078974 |
| C  | -1.6551531 | 1.8602180  | 3.1023217  | H  | 0.1663716  | -4.2040074 | 0.3929854  |
| C  | -2.6853829 | 2.4121654  | 2.3204176  | Zn | -0.8760623 | 2.7399934  | -0.5858830 |
| C  | -2.4691166 | 3.5094191  | 1.4663151  | Br | -0.5690795 | 4.5461391  | -2.0768272 |
| H  | -0.9965342 | 4.9967392  | 0.8610669  | H  | 3.1315090  | -2.0215365 | -4.2238496 |
| C  | -1.9808876 | 0.7536523  | 4.0992638  | H  | -2.4738189 | 3.1069292  | -2.8424562 |
| H  | -3.6889938 | 1.9708465  | 2.3858421  |    |            |            |            |
| C  | -2.8345349 | -0.3779370 | 3.5120248  |    |            |            |            |
| H  | -3.8567276 | -0.0419409 | 3.2432505  |    |            |            |            |
| H  | -2.9451813 | -1.1950751 | 4.2533960  |    |            |            |            |
| H  | -2.3758517 | -0.8006396 | 2.5988122  |    |            |            |            |

### 7.2.1.3 to 15s-mi

#### TS1-8-s; woelfling data

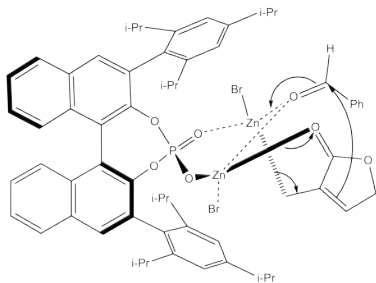

Energy(Hartree)= -11969.99755829

|    |           |           |           |
|----|-----------|-----------|-----------|
| C  | -7.028634 | 3.446293  | -0.611502 |
| C  | -2.766126 | 3.451403  | -0.580838 |
| C  | -6.315312 | 4.662232  | -0.626700 |
| C  | -4.941303 | 2.200743  | -0.519979 |
| C  | -4.215410 | 3.415648  | -0.569380 |
| C  | -6.340172 | 2.222383  | -0.558386 |
| C  | -4.919690 | 4.648777  | -0.612833 |
| O  | -2.023280 | 2.415244  | -0.426848 |
| H  | -8.129195 | 3.458085  | -0.634594 |
| H  | -4.421491 | 1.232489  | -0.448844 |
| H  | -6.856844 | 5.619680  | -0.653207 |
| H  | -6.890895 | 1.270082  | -0.538413 |
| H  | -4.353624 | 5.592595  | -0.639687 |
| Br | -3.791214 | -1.278012 | -1.086554 |
| Zn | -2.269532 | 0.426695  | -1.663171 |
| H  | -1.616889 | 5.592595  | -4.330447 |
| H  | -2.438486 | 0.680366  | -4.067338 |
| C  | -2.621653 | 4.002972  | -3.215282 |
| C  | -1.455574 | 4.920563  | -3.456898 |
| H  | -3.652181 | 4.359757  | -3.097823 |
| C  | -2.221445 | 2.704975  | -3.449807 |
| C  | -2.867206 | 1.428627  | -3.370136 |
| C  | -0.745070 | 2.754918  | -3.722914 |
| O  | -0.340515 | 4.063651  | -3.735485 |
| O  | 0.013896  | 1.827835  | -3.909744 |
| H  | -1.180255 | 5.555388  | -2.585305 |
| H  | -3.970660 | 1.426977  | -3.363770 |
| C  | 0.818564  | -1.377769 | 2.254744  |
| C  | 1.991325  | -2.120405 | 2.081938  |
| C  | 2.850976  | -2.296247 | 3.229501  |
| C  | 4.154657  | -2.870281 | 3.138202  |
| C  | 2.393569  | -1.846985 | 4.522013  |
| C  | 3.222163  | -2.050234 | 5.665885  |
| C  | 1.135859  | -1.189135 | 4.631803  |
| H  | 0.778474  | -0.887387 | 5.627943  |
| C  | 0.354946  | -0.901517 | 3.519097  |
| C  | 2.795451  | -2.315605 | -1.675934 |
| C  | 3.203193  | -3.639697 | -1.792312 |
| H  | 3.562090  | -4.003094 | -2.767766 |
| C  | 3.112988  | -4.554741 | -0.704793 |
| C  | 3.447261  | -5.932415 | -0.870087 |
| C  | 2.637441  | -4.094803 | 0.578436  |
| C  | 2.454776  | -5.058054 | 1.615561  |
| C  | 2.337446  | -2.692661 | 0.750305  |
| C  | 2.373266  | -1.877938 | -0.384782 |
| O  | 0.005259  | -1.122143 | 1.145388  |
| O  | 2.054136  | -0.527480 | -0.264214 |
| P  | 0.544569  | -0.020023 | 0.064409  |
| O  | 0.780640  | 1.358125  | 0.741831  |
| O  | -0.394598 | -0.012211 | -1.135178 |
| C  | 4.471852  | -2.637777 | 5.545781  |
| C  | 4.944991  | -3.034685 | 4.267057  |
| H  | 2.852656  | -1.714182 | 6.647548  |
| H  | 5.104055  | -2.782436 | 6.434995  |
| H  | 4.537408  | -3.174871 | 2.154553  |
| H  | 5.949914  | -3.472517 | 4.167873  |

|   |           |           |           |
|---|-----------|-----------|-----------|
| C | 2.769511  | -6.394807 | 1.415124  |
| C | 3.286734  | -6.836352 | 0.168580  |
| H | 2.046325  | -4.732778 | 2.582289  |
| H | 2.609799  | -7.118918 | 2.228523  |
| H | 3.541595  | -7.897264 | 0.024251  |
| H | 3.820795  | -6.266545 | -1.850764 |
| C | -0.965748 | 1.239365  | 3.830047  |
| C | -0.947461 | -0.169998 | 3.638649  |
| C | -2.207808 | 1.881678  | 3.982970  |
| C | -2.166450 | -0.898112 | 3.575807  |
| C | -3.381787 | -0.201769 | 3.715836  |
| C | -3.427272 | 1.185238  | 3.935185  |
| H | -2.234870 | 2.970520  | 4.150398  |
| C | -2.190225 | -2.412472 | 3.375437  |
| H | -4.322622 | -0.770985 | 3.661060  |
| C | -2.797272 | -2.793082 | 2.016069  |
| H | -3.858300 | -2.477742 | 1.939070  |
| H | -2.760566 | -3.891323 | 1.861899  |
| H | -2.259073 | -2.309735 | 1.180182  |
| C | -2.905455 | -3.129809 | 4.533809  |
| H | -1.138731 | -2.766547 | 3.379194  |
| H | -3.980756 | -2.858275 | 4.579741  |
| H | -2.451301 | -2.878311 | 5.513719  |
| H | -2.850025 | -4.229633 | 4.398614  |
| C | -4.734766 | 1.922751  | 4.197961  |
| C | -5.867234 | 1.527990  | 3.239431  |
| H | -6.765814 | 2.153692  | 3.418249  |
| H | -6.173183 | 0.470281  | 3.377441  |
| H | -5.565446 | 1.655858  | 2.181334  |
| C | -5.154178 | 1.740427  | 5.670367  |
| H | -4.526976 | 3.005351  | 4.042953  |
| H | -6.071539 | 2.320715  | 5.902203  |
| H | -4.351690 | 2.071321  | 6.360074  |
| H | -5.361158 | 0.671814  | 5.888883  |
| C | 0.318379  | 2.065866  | 3.874811  |
| C | 0.166293  | 3.429005  | 3.179884  |
| H | 1.148964  | 3.855806  | 2.899136  |
| H | -0.350364 | 4.176988  | 3.816477  |
| H | -0.453848 | 3.352669  | 2.258774  |
| C | 0.816779  | 2.275947  | 5.318238  |
| H | 1.092413  | 1.497672  | 3.320113  |
| H | 1.745406  | 2.883498  | 5.331738  |
| H | 1.035740  | 1.315129  | 5.821525  |
| H | 0.051703  | 2.805942  | 5.923558  |
| H | 1.319208  | 1.296574  | -6.541905 |
| H | 6.271552  | 0.543846  | -3.292049 |
| H | 0.307593  | -4.624275 | -4.874015 |
| C | 2.376300  | 1.377127  | -6.204840 |
| H | 5.282499  | 1.556776  | -0.436950 |
| H | 2.404198  | 3.499525  | -6.719915 |
| H | -1.405748 | -3.128700 | -3.688490 |
| C | 2.513878  | 0.428136  | -5.021185 |
| C | 6.079071  | -0.177737 | -2.470807 |
| C | 2.630316  | 2.849149  | -5.849856 |
| H | 3.691878  | 3.031545  | -5.580290 |
| C | 3.470029  | 0.619909  | -4.011799 |
| C | 0.996843  | -3.757810 | -4.950502 |
| H | 3.059779  | -0.130577 | -7.658842 |
| C | 1.675993  | -0.693660 | -4.921457 |
| C | 3.276612  | 0.917271  | -7.368106 |
| H | 3.135916  | 1.560750  | -8.261869 |
| H | 0.903523  | -0.840761 | -5.694055 |
| C | 4.523009  | 1.410337  | -1.232790 |
| H | 6.862096  | -0.025839 | -1.698778 |
| H | 6.199266  | -1.197994 | -2.888111 |
| C | 3.593350  | -0.257084 | -2.919875 |
| C | -0.704426 | -2.273860 | -3.775271 |
| C | 1.750304  | -1.602161 | -3.852631 |
| H | 2.036928  | -4.143720 | -4.940086 |
| H | 0.830897  | -3.282015 | -5.939665 |
| C | 4.672692  | 0.018334  | -1.873707 |

|    |           |           |           |
|----|-----------|-----------|-----------|
| C  | 2.728317  | -1.382386 | -2.841096 |
| C  | 0.754647  | -2.762012 | -3.801831 |
| H  | 3.522004  | 1.534240  | -0.775460 |
| H  | -0.876139 | -1.612478 | -2.905754 |
| H  | 4.663222  | 2.221679  | -1.976925 |
| H  | 1.994161  | 3.168750  | -5.001801 |
| H  | -0.970323 | -1.710217 | -4.693598 |
| H  | 4.347026  | 0.967689  | -7.076926 |
| H  | 4.561962  | -0.730307 | -1.062584 |
| H  | 0.919723  | -3.311199 | -2.853444 |
| Zn | -0.066882 | 2.893116  | 0.031491  |
| Br | 0.473043  | 5.092213  | -0.309285 |
| H  | 4.137957  | 1.493196  | -4.063726 |
| H  | -2.276801 | 4.450089  | -0.566680 |

### 7.2.1.4 to 15l-mi

### TS1-8-l; COSMO

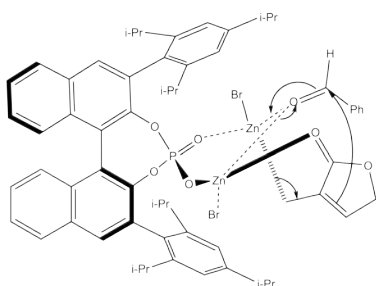

Energy(Hartree)= -11970.01475754

|   |            |            |            |
|---|------------|------------|------------|
| C | 1.0500379  | 2.1853175  | 1.9454349  |
| C | 2.4420176  | 2.0620188  | 1.9217981  |
| C | 3.2190784  | 3.2777001  | 1.9335578  |
| C | 4.6341042  | 3.2922320  | 1.7480214  |
| C | 2.5379873  | 4.5405053  | 2.1071632  |
| C | 3.3047710  | 5.7438583  | 2.1419823  |
| C | 1.1158927  | 4.5739193  | 2.2011281  |
| H | 0.6147595  | 5.5455852  | 2.3321578  |
| C | 0.3467981  | 3.4221563  | 2.0792075  |
| C | 3.2799284  | -1.4755466 | 0.6468529  |
| C | 4.2649512  | -1.8658676 | 1.5455592  |
| H | 4.7643835  | -2.8369621 | 1.4088493  |
| C | 4.6447443  | -1.0463464 | 2.6482701  |
| C | 5.6118009  | -1.4949361 | 3.5971694  |
| C | 4.0364385  | 0.2523287  | 2.8243076  |
| C | 4.3900547  | 1.0129851  | 3.9790603  |
| C | 3.0677707  | 0.7073167  | 1.8548943  |
| C | 2.6942576  | -0.1891162 | 0.8483005  |
| O | 0.2782291  | 1.0353292  | 1.8948506  |
| O | 1.6867646  | 0.1751136  | -0.0478075 |
| P | 0.1562626  | 0.1374732  | 0.5252228  |
| O | -0.7343369 | 0.7896387  | -0.5184381 |
| O | -0.2110842 | -1.2558187 | 1.0881944  |
| C | 4.6817110  | 5.7197904  | 1.9800699  |
| C | 5.3469952  | 4.4831331  | 1.7679642  |
| H | 2.7747880  | 6.6990773  | 2.2824218  |
| H | 5.2578952  | 6.6573248  | 1.9994726  |
| H | 5.1585192  | 2.3421174  | 1.5732464  |
| H | 6.4363929  | 4.4680300  | 1.6115294  |
| C | 5.3234434  | 0.5395999  | 4.8911573  |
| C | 5.9518190  | -0.7184907 | 4.6945890  |
| H | 3.9050191  | 1.9842892  | 4.1476579  |
| H | 5.5744541  | 1.1440925  | 5.7760970  |
| H | 6.6957929  | -1.0808508 | 5.4202147  |
| H | 6.0754437  | -2.4823708 | 3.4452485  |

|   |            |            |            |
|---|------------|------------|------------|
| C | -1.7823242 | 4.0034689  | 0.8531403  |
| C | -1.1459556 | 3.4114870  | 1.9813785  |
| C | -3.1757004 | 3.8553361  | 0.7104193  |
| C | -1.9287289 | 2.7196278  | 2.9495934  |
| C | -3.3133439 | 2.5925461  | 2.7495026  |
| C | -3.9599945 | 3.1383852  | 1.6272867  |
| H | -3.6693205 | 4.2979167  | -0.1706668 |
| C | -1.3221613 | 2.1405790  | 4.2279012  |
| H | -3.9069414 | 2.0460859  | 3.4988319  |
| C | -1.5909761 | 0.6347927  | 4.3739695  |
| H | -2.6688415 | 0.3955868  | 4.4718212  |
| H | -1.0723281 | 0.2052726  | 5.2543190  |
| H | -1.1836972 | 0.1059992  | 3.4845283  |
| C | -1.8124611 | 2.9162858  | 5.4654388  |
| H | -0.2225695 | 2.2749224  | 4.1776434  |
| H | -2.9113211 | 2.8248293  | 5.5909738  |
| H | -1.3338793 | 2.5305228  | 6.3893035  |
| H | -1.5738284 | 3.9952177  | 5.3775517  |
| C | -5.4646110 | 3.0109918  | 1.4221759  |
| C | -5.9977120 | 1.6011818  | 1.7193594  |
| H | -7.0730427 | 1.5260441  | 1.4582161  |
| H | -5.9039325 | 1.3420362  | 2.7943936  |
| H | -5.4447238 | 0.8353603  | 1.1410786  |
| C | -6.2149584 | 4.0774833  | 2.2433475  |
| H | -5.6564450 | 3.2206343  | 0.3463061  |
| H | -7.3081119 | 4.0315337  | 2.0564045  |
| H | -5.8635983 | 5.0985725  | 1.9931255  |
| H | -6.0487623 | 3.9240289  | 3.3304912  |
| C | -1.0221366 | 4.7561428  | -0.2384627 |
| C | -1.1866770 | 4.0920626  | -1.6151905 |
| H | -0.5825144 | 4.6171558  | -2.3827841 |
| H | -2.2406300 | 4.1020682  | -1.9635069 |
| H | -0.8480669 | 3.0398058  | -1.5916187 |
| C | -1.4220420 | 6.2425444  | -0.2686514 |
| H | 0.0572819  | 4.7114721  | 0.0051596  |
| H | -0.8262624 | 6.7927981  | -1.0258850 |
| H | -1.2618005 | 6.7282836  | 0.7160187  |
| H | -2.4934291 | 6.3698626  | -0.5303479 |
| H | 1.5586693  | -5.7357692 | -3.6324341 |
| H | 5.3830470  | -1.3803715 | -3.5399348 |
| H | 2.1774146  | -5.3945754 | 2.6087228  |
| C | 1.7452312  | -4.7034000 | -4.0044760 |
| H | 3.7416050  | 1.3399475  | -3.2011734 |
| H | 0.0402415  | -4.7957987 | -5.4021280 |
| H | -0.2359360 | -4.5205974 | 1.9841709  |
| C | 2.1687019  | -3.8737948 | -2.7982778 |
| C | 5.3784528  | -0.8391024 | -2.5705056 |
| C | 0.4152325  | -4.1685810 | -4.5665794 |
| H | 0.5253557  | -3.1282879 | -4.9385659 |
| C | 2.8201106  | -2.6381306 | -2.9454640 |
| C | 2.5362806  | -5.1003134 | 1.6006183  |
| C | 3.0102512  | -3.8027253 | -5.5655309 |
| H | 1.8450162  | -4.2888696 | -1.4967019 |
| C | 2.8226916  | -4.7905220 | -5.0958010 |
| H | 2.5018159  | -5.4778621 | -5.9053075 |
| H | 1.3001795  | -5.2383968 | -1.3686352 |
| C | 3.1959609  | 0.3813206  | -3.0820244 |
| H | 5.9182135  | -1.4681960 | -1.8336241 |
| H | 5.9508316  | 0.1019838  | -2.7065038 |
| C | 3.1825235  | -1.8445921 | -1.8435517 |
| C | 0.1797157  | -4.4289301 | 0.9596726  |
| C | 2.1557027  | -3.5206445 | -0.3585314 |
| H | 3.5939609  | -4.7838557 | 1.6944041  |
| H | 2.5157282  | -6.0038735 | 0.9553819  |
| C | 3.9401117  | -0.5429405 | -2.1039725 |
| C | 2.8689339  | -2.3025465 | -0.5317040 |
| C | 1.6549109  | -3.9854435 | 1.0087378  |
| H | 2.1738665  | 0.6133477  | -2.7232198 |
| H | -0.4309066 | -3.6932829 | 0.3970428  |
| H | 3.0995030  | -0.0683518 | -4.0917698 |
| H | -0.3622998 | -4.1473921 | -3.7798998 |

|    |            |            |            |
|----|------------|------------|------------|
| H  | 0.0570096  | -5.4164197 | 0.4677264  |
| H  | 3.7857488  | -5.1605121 | -4.6898725 |
| H  | 4.0284052  | 0.0042670  | -1.1445788 |
| H  | 1.7070811  | -3.1097026 | 1.6878835  |
| H  | 3.0631212  | -2.2756494 | -3.9559329 |
| Zn | -1.5448974 | 0.2639354  | -2.2662923 |
| Br | -0.8335790 | 1.3388167  | -4.2072108 |
| C  | -3.7668183 | -4.5058038 | -5.4246809 |
| C  | -3.3428479 | -4.1883920 | -4.1289343 |
| C  | -2.8372375 | -2.8997791 | -3.8361651 |
| C  | -2.7568031 | -1.9346774 | -4.8657331 |
| C  | -3.1920747 | -2.2544619 | -6.1572909 |
| C  | -3.6980347 | -3.5359575 | -6.4414636 |
| H  | -4.1512433 | -5.5130849 | -5.6465146 |
| H  | -3.3947967 | -4.9446318 | -3.3282733 |
| C  | -2.4000431 | -2.6073868 | -2.4588836 |
| H  | -2.3402914 | -0.9358441 | -4.6584287 |
| H  | -3.1280931 | -1.4960863 | -6.9524797 |
| H  | -4.0347717 | -3.7826250 | -7.4601045 |
| O  | -1.5602707 | -1.7171108 | -2.1387901 |
| C  | -4.6538800 | -1.8066653 | -1.7597269 |
| C  | -4.0983222 | -0.6961333 | -1.1087367 |
| C  | -3.6974113 | -1.2232417 | 0.2184238  |
| O  | -4.1433595 | -2.4749906 | 0.4045078  |
| C  | -4.9474027 | -2.8626795 | -0.7420396 |
| O  | -3.0208743 | -0.6568622 | 1.0952342  |
| C  | -3.6988945 | 0.5803860  | -1.5557939 |
| H  | -6.0091915 | -2.8873881 | -0.4051639 |
| H  | -4.6582259 | -3.8980305 | -1.0210604 |
| Zn | -1.6969288 | -1.6988250 | 2.2364343  |
| Br | -2.1767954 | -3.1038849 | 3.9589104  |
| H  | -3.3988585 | 1.3161407  | -0.7899633 |
| H  | -4.1454987 | 0.9753115  | -2.4821238 |
| H  | -2.5676938 | -3.4289927 | -1.7198174 |
| H  | -5.1322803 | -1.7878284 | -2.7469794 |

|   |            |            |            |
|---|------------|------------|------------|
| O | 0.2806654  | 1.0322440  | 1.8950045  |
| O | 1.6915428  | 0.1758185  | -0.0477313 |
| P | 0.1611685  | 0.1340471  | 0.5249647  |
| O | -0.7352142 | 0.7810364  | -0.5172042 |
| O | -0.1989581 | -1.2600244 | 1.0910311  |
| C | 4.6839305  | 5.7164503  | 1.9925511  |
| C | 5.3489881  | 4.4797830  | 1.7810235  |
| H | 2.7770190  | 6.6964311  | 2.2912007  |
| H | 5.2605084  | 6.6536825  | 2.0139849  |
| H | 5.1598320  | 2.3393587  | 1.5842429  |
| H | 6.4387168  | 4.4642559  | 1.6270971  |
| C | 5.3164473  | 0.5309067  | 4.9006032  |
| C | 5.9442745  | -0.7271305 | 4.7034463  |
| H | 3.9012765  | 1.9780399  | 4.1558606  |
| H | 5.5655565  | 1.1335858  | 5.7872975  |
| H | 6.6859742  | -1.0914207 | 5.4304154  |
| H | 6.0699179  | -2.4887362 | 3.4514957  |
| C | -1.7737883 | 4.0052249  | 0.8446319  |
| C | -1.1442612 | 3.4118481  | 1.9758101  |
| C | -3.1664381 | 3.8586983  | 0.6944033  |
| C | -1.9326728 | 2.7206474  | 2.9395554  |
| C | -3.3162615 | 2.5950344  | 2.7319708  |
| C | -3.9563667 | 3.1421247  | 1.6066663  |
| H | -3.6548490 | 4.3023648  | -0.1890398 |
| C | -1.3334673 | 2.1418126  | 4.2213851  |
| H | -3.9143915 | 2.0486790  | 3.4777469  |
| C | -1.6032677 | 0.6362905  | 4.3668490  |
| H | -2.6815724 | 0.3969567  | 4.4590834  |
| H | -1.0892261 | 0.2066988  | 5.2498174  |
| H | -1.1913992 | 0.1075331  | 3.4795590  |
| C | -1.8295282 | 2.9186491  | 5.4558971  |
| H | -0.2335563 | 2.2756716  | 4.1767304  |
| H | -2.9290527 | 2.8280719  | 5.5759147  |
| H | -1.3559684 | 2.5332532  | 6.3824916  |
| H | -1.5898430 | 3.9973257  | 5.3684596  |
| C | -5.4601528 | 3.0170758  | 1.3936696  |
| C | -5.9973314 | 1.6080734  | 1.6872555  |
| H | -7.0713789 | 1.5348697  | 1.4202577  |
| H | -5.9098940 | 1.3482561  | 2.7626312  |
| H | -5.4425182 | 0.8416203  | 1.1116703  |
| C | -6.2132823 | 4.0845132  | 2.2110279  |
| H | -5.6458862 | 3.2273905  | 0.3168348  |
| H | -7.3055030 | 4.0404450  | 2.0181885  |
| H | -5.8588781 | 5.1050448  | 1.9630971  |
| H | -6.0532187 | 3.9305515  | 3.2989642  |
| C | -1.0064086 | 4.7573726  | -0.2423131 |
| C | -1.1628802 | 4.0940555  | -1.6203963 |
| H | -0.5531241 | 4.6185813  | -2.3838584 |
| H | -2.2144562 | 4.1054199  | -1.9757176 |
| H | -0.8254551 | 3.0413925  | -1.5952798 |
| C | -1.4036658 | 6.2444617  | -0.2738135 |
| H | 0.0714289  | 4.7110896  | 0.0078234  |
| H | -0.8024923 | 6.7942394  | -1.0270729 |
| H | -1.2486010 | 6.7292614  | 0.7121279  |
| H | -2.4732153 | 6.3738309  | -0.5417987 |
| H | 1.5588593  | -5.7123526 | -3.6538462 |
| H | 5.3947780  | -1.3675442 | -3.5344658 |
| H | 2.1728742  | -5.4029986 | 2.5904837  |
| C | 1.7482520  | -4.6784713 | -4.0203094 |
| H | 3.7592566  | 1.3553845  | -3.1860923 |
| H | 0.0435979  | -4.7590026 | -5.4194436 |
| H | -0.2382342 | -4.5221639 | 1.9669779  |
| C | 2.1732770  | -3.8564374 | -2.8094986 |
| C | 5.3897357  | -0.8306888 | -2.5626352 |
| C | 0.4198081  | -4.1371961 | -4.5804103 |
| H | 0.5328412  | -3.0952765 | -4.9469046 |
| C | 2.8275163  | -2.6216390 | -2.9500115 |
| C | 2.5335129  | -5.1047479 | 1.5842123  |
| H | 3.0164608  | -3.7728707 | -5.5758109 |
| C | 1.8475767  | -4.2771996 | -1.5103732 |
| C | 2.8260878  | -4.7626214 | -5.1114527 |

### TS1-8-1

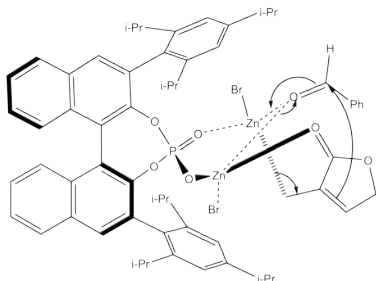

Energy(Hartree)= -11970.00266711  
number of imaginary frequencies: 3

|   |           |            |           |
|---|-----------|------------|-----------|
| C | 1.0507804 | 2.1833880  | 1.9473765 |
| C | 2.4428014 | 2.0602494  | 1.9264721 |
| C | 3.2203117 | 3.2754881  | 1.9406997 |
| C | 4.6356534 | 3.2893833  | 1.7584783 |
| C | 2.5395029 | 4.5383005  | 2.1137816 |
| C | 3.3068394 | 5.7410531  | 2.1512940 |
| C | 1.1173588 | 4.5718028  | 2.2046066 |
| H | 0.6161674 | 5.5434838  | 2.3352355 |
| C | 0.3479360 | 3.4205489  | 2.0801150 |
| C | 3.2825451 | -1.4749946 | 0.6475417 |
| C | 4.2648712 | -1.8677630 | 1.5480053 |
| H | 4.7635559 | -2.8391794 | 1.4109618 |
| C | 4.6425481 | -1.0504919 | 2.6531553 |
| C | 5.6066284 | -1.5012197 | 3.6038596 |
| C | 4.0348358 | 0.2483421  | 2.8300603 |
| C | 4.3859645 | 1.0066219  | 3.9869890 |
| C | 3.0688742 | 0.7058771  | 1.8592563 |
| C | 2.6975229 | -0.1886156 | 0.8502595 |



|    |            |            |            |    |           |           |           |
|----|------------|------------|------------|----|-----------|-----------|-----------|
| H  | 2.5039131  | -5.4447479 | -5.9248225 | Br | 5.474887  | -0.062677 | 0.609559  |
| H  | 1.3009199  | -5.2263540 | -1.3874915 | C  | 0.261309  | 6.553397  | -1.901637 |
| C  | 3.2110854  | 0.3976023  | -3.0723349 | C  | 0.631383  | 5.262534  | -1.515421 |
| H  | 5.9266193  | -1.4644911 | -1.8277408 | C  | 0.640404  | 4.908327  | -0.145267 |
| H  | 5.9646732  | 0.1095697  | -2.6933461 | C  | 0.269432  | 5.865997  | 0.826757  |
| C  | 3.1901892  | -1.8341780 | -1.8440235 | C  | -0.106134 | 7.156214  | 0.436489  |
| C  | 0.1790086  | -4.4265037 | 0.9434825  | C  | -0.110355 | 7.498099  | -0.928037 |
| C  | 2.1582854  | -3.5152015 | -0.3681388 | H  | 0.241625  | 6.821533  | -2.968342 |
| H  | 3.5915739  | -4.7905554 | 1.6807467  | H  | 0.922540  | 4.514280  | -2.265027 |
| H  | 2.5122962  | -6.0052865 | 0.9348343  | C  | 0.997992  | 3.552897  | 0.281300  |
| C  | 3.9512664  | -0.5331268 | -2.0973768 | H  | 0.268872  | 5.580282  | 1.888241  |
| C  | 2.8737288  | -2.2976143 | -0.5347726 | H  | -0.399856 | 7.899584  | 1.192704  |
| C  | 1.6548851  | -3.9856974 | 0.9962888  | H  | -0.411415 | 8.511125  | -1.237228 |
| H  | 2.1890219  | 0.6306582  | -2.7143033 | O  | 1.211892  | 2.602557  | -0.487934 |
| H  | -0.4295959 | -3.6872916 | 0.3833552  | C  | 3.347368  | 3.712541  | -3.304200 |
| H  | 3.1150942  | -0.0469293 | -4.0843582 | C  | 2.647921  | 2.529749  | -3.317992 |
| H  | -0.3581301 | -4.1179167 | -3.7940090 | C  | 3.335799  | 1.676820  | -2.333738 |
| H  | 0.0552790  | -5.4115404 | 0.4468590  | O  | 4.372440  | 2.299839  | -1.761946 |
| H  | 3.7879041  | -5.1372328 | -4.7069729 | C  | 4.456346  | 3.632960  | -2.306379 |
| H  | 4.0393267  | 0.0094640  | -1.1353371 | O  | 3.010709  | 0.517722  | -2.009694 |
| H  | 1.7076027  | -3.1132906 | 1.6796540  | C  | 1.399195  | 2.069208  | -3.906174 |
| H  | 3.0725694  | -2.2548982 | -3.9584196 | H  | 5.479573  | 3.759866  | -2.724808 |
| Zn | -1.5492593 | 0.2501453  | -2.2618345 | H  | 4.351498  | 4.341609  | -1.453416 |
| Br | -0.8533461 | 1.3244595  | -4.2075496 | Zn | 0.022569  | 2.012409  | -2.387118 |
| C  | -3.8046124 | -4.5214574 | -5.3905857 | Br | -2.013240 | 3.171403  | -2.145661 |
| C  | -3.3593707 | -4.2047935 | -4.1019475 | C  | -1.366094 | -0.874031 | 1.944581  |
| C  | -2.8525815 | -2.9151883 | -3.8154864 | C  | -2.075095 | -2.062096 | 1.705716  |
| C  | -2.7912675 | -1.9486370 | -4.8449637 | C  | -2.420219 | -2.887330 | 2.842402  |
| C  | -3.2478390 | -2.2679350 | -6.1292507 | C  | -2.935171 | -4.213283 | 2.712869  |
| C  | -3.7557919 | -3.5499656 | -6.4067324 | C  | -2.205801 | -2.376395 | 4.173378  |
| H  | -4.1900928 | -5.5294322 | -5.6073572 | C  | -2.586590 | -3.162459 | 5.301491  |
| H  | -3.3952828 | -4.9625227 | -3.3017702 | C  | -1.562328 | -1.120585 | 4.339137  |
| C  | -2.4009093 | -2.6216730 | -2.4427052 | H  | -1.394746 | -0.736028 | 5.356764  |
| H  | -2.3728999 | -0.9491607 | -4.6436550 | C  | -1.079941 | -0.392069 | 3.259150  |
| H  | -3.1988582 | -1.5083845 | -6.9243427 | C  | -1.656775 | -3.062194 | -1.983383 |
| H  | -4.1097283 | -3.7957463 | -7.4197247 | C  | -2.923968 | -3.559359 | -2.268591 |
| O  | -1.5595570 | -1.7301633 | -2.1298463 | H  | -3.117840 | -4.001488 | -3.257820 |
| C  | -4.6452182 | -1.8288211 | -1.7382539 | C  | -4.003062 | -3.451064 | -1.344174 |
| C  | -4.0932327 | -0.7143816 | -1.0892322 | C  | -5.322794 | -3.862731 | -1.699371 |
| C  | -3.6847828 | -1.2387444 | 0.2366754  | C  | -3.775606 | -2.863695 | -0.045364 |
| O  | -4.1237153 | -2.4929470 | 0.4249820  | C  | -4.899615 | -2.651925 | 0.807274  |
| C  | -4.9296530 | -2.8851856 | -0.7180178 | C  | -2.430723 | -2.489213 | 0.323155  |
| C  | -3.0087180 | -0.6694221 | 1.1108098  | C  | -1.443426 | -2.553363 | -0.663083 |
| O  | -3.7017494 | 0.5627757  | -1.5390286 | O  | -0.973732 | -0.064884 | 0.884486  |
| H  | -5.9900771 | -2.9148879 | -0.3768828 | O  | -0.154395 | -2.153491 | -0.335025 |
| H  | -4.6364759 | -3.9194583 | -0.9972531 | P  | 0.164446  | -0.548949 | -0.203318 |
| Zn | -1.6776669 | -1.7086286 | 2.2463609  | O  | 1.561913  | -0.534666 | 0.464080  |
| Br | -2.1452948 | -3.1144799 | 3.9709838  | O  | -0.087543 | 0.193155  | -1.499281 |
| H  | -3.3985170 | 1.3001921  | -0.7761196 | C  | -3.112190 | -4.433999 | 5.137579  |
| H  | -4.1531510 | 0.9550060  | -2.4640757 | C  | -3.264473 | -4.967871 | 3.830371  |
| H  | -2.5564335 | -3.4457969 | -1.7035016 | H  | -2.430800 | -2.743003 | 6.307960  |
| H  | -5.1347534 | -1.8098960 | -2.7200581 | H  | -3.388848 | -5.037315 | 6.015444  |
|    |            |            |            | H  | -3.053647 | -4.646911 | 1.710689  |
|    |            |            |            | H  | -3.642989 | -5.993237 | 3.700778  |
|    |            |            |            | C  | -6.175150 | -3.038257 | 0.419951  |
|    |            |            |            | C  | -6.389244 | -3.667102 | -0.835008 |
|    |            |            |            | H  | -4.747664 | -2.160412 | 1.778173  |
|    |            |            |            | H  | -7.027822 | -2.849854 | 1.090014  |
|    |            |            |            | H  | -7.403879 | -3.977392 | -1.127745 |
|    |            |            |            | H  | -5.481007 | -4.322416 | -2.687691 |
|    |            |            |            | C  | 1.107682  | 0.662409  | 3.893480  |
|    |            |            |            | C  | -0.252214 | 0.830087  | 3.516313  |
|    |            |            |            | C  | 1.844017  | 1.797488  | 4.280110  |
|    |            |            |            | C  | -0.839571 | 2.122484  | 3.501118  |
|    |            |            |            | C  | -0.063530 | 3.223811  | 3.914171  |
|    |            |            |            | C  | 1.274820  | 3.081193  | 4.327897  |
|    |            |            |            | H  | 2.895184  | 1.675706  | 4.587142  |
|    |            |            |            | C  | -2.286578 | 2.324929  | 3.060853  |
|    |            |            |            | H  | -0.536818 | 4.218280  | 3.947286  |
|    |            |            |            | C  | -2.355737 | 2.947960  | 1.655009  |
|    |            |            |            | H  | -1.930210 | 3.973436  | 1.643537  |

## 7.2.1.5 to 15a-mi

### TS1-8-a; woelfling data

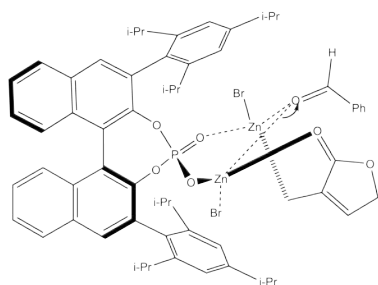

Energy(Hartree)= -11970.007221

Zn 3.319757 -0.123132 -0.140138

|   |           |           |           |
|---|-----------|-----------|-----------|
| H | -3.404407 | 3.022475  | 1.301995  |
| H | -1.806809 | 2.341640  | 0.909709  |
| C | -3.105931 | 3.130178  | 4.083380  |
| H | -2.748865 | 1.317772  | 2.996525  |
| H | -2.756557 | 4.181433  | 4.157999  |
| H | -3.045681 | 2.682469  | 5.096353  |
| H | -4.173346 | 3.163774  | 3.784140  |
| C | 2.068330  | 4.241792  | 4.918585  |
| C | 2.054185  | 5.509564  | 4.053330  |
| H | 2.701312  | 6.294852  | 4.494608  |
| H | 1.033067  | 5.939499  | 3.978780  |
| H | 2.417663  | 5.307828  | 3.025685  |
| C | 1.577739  | 4.542036  | 6.348544  |
| H | 3.124560  | 3.900830  | 4.991602  |
| H | 2.186850  | 5.339506  | 6.822657  |
| H | 1.630828  | 3.638552  | 6.988282  |
| H | 0.520578  | 4.881222  | 6.338350  |
| C | 1.764900  | -0.716102 | 3.943447  |
| C | 3.162983  | -0.719486 | 3.318869  |
| H | 3.540519  | -1.752798 | 3.184350  |
| H | 3.911156  | -0.171550 | 3.926882  |
| H | 3.148244  | -0.239933 | 2.326809  |
| C | 1.825137  | -1.257371 | 5.383614  |
| H | 1.136051  | -1.404602 | 3.342341  |
| H | 2.291166  | -2.264170 | 5.400791  |
| H | 0.820394  | -1.337974 | 5.841687  |
| H | 2.437928  | -0.589095 | 6.024329  |
| H | 2.398194  | -1.402827 | -6.444291 |
| H | 1.809151  | -6.169214 | -2.961967 |
| H | -3.741725 | -1.546134 | -5.833479 |
| C | 2.761179  | -2.166987 | -5.721669 |
| H | 2.199369  | -5.039337 | 0.019971  |
| H | 4.751801  | -1.242087 | -5.662583 |
| H | -2.873179 | 0.636610  | -4.763968 |
| C | 1.597118  | -2.469490 | -4.787801 |
| C | 0.946038  | -6.047787 | -2.274414 |
| C | 3.951167  | -1.555107 | -4.960849 |
| H | 4.396528  | -2.285470 | -4.253143 |
| C | 1.735317  | -3.349862 | -3.699912 |
| C | -2.759299 | -2.024339 | -5.639468 |
| H | 2.328363  | -3.824214 | -7.100827 |
| C | 0.345325  | -1.869321 | -4.985579 |
| C | 3.182557  | -3.406452 | -6.530793 |
| H | 3.988755  | -3.155762 | -7.251239 |
| H | 0.219025  | -1.191325 | -5.845274 |
| C | 2.131514  | -4.322721 | -0.824287 |
| H | 1.045412  | -6.804698 | -1.468738 |
| H | 0.026409  | -6.276802 | -2.850056 |
| C | 0.682916  | -3.601320 | -2.804096 |
| C | -1.890957 | 0.138045  | -4.642512 |
| C | -0.744252 | -2.081115 | -4.119451 |
| H | -2.928436 | -3.109148 | -5.482358 |
| H | -2.144453 | -1.917674 | -6.557868 |
| C | 0.894346  | -4.623575 | -1.687952 |
| C | -0.566359 | -2.944006 | -2.999489 |
| C | -2.062414 | -1.372036 | -4.430126 |
| H | 2.076144  | -3.302355 | -0.397130 |
| H | -1.409720 | 0.599101  | -3.760921 |
| H | 3.073645  | -4.409946 | -1.404534 |
| H | 3.636909  | -0.673443 | -4.367778 |
| H | -1.277855 | 0.378560  | -5.535398 |
| H | 3.565551  | -4.208531 | -5.865569 |
| H | 0.010766  | -4.586159 | -1.019690 |
| H | -2.728973 | -1.491191 | -3.553647 |
| H | 2.699642  | -3.858173 | -3.539377 |
| H | 1.031634  | 2.697999  | -4.737191 |
| H | 1.444977  | 0.999632  | -4.196587 |
| H | 3.130440  | 4.617667  | -3.885933 |
| H | 1.073341  | 3.382989  | 1.388047  |

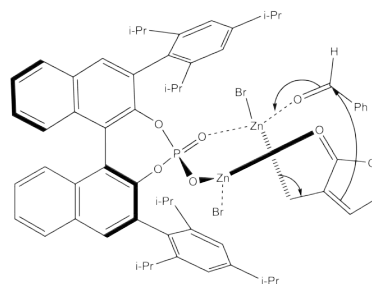

Energy(Hartree)=-11970.02467535

|    |            |            |            |
|----|------------|------------|------------|
| Zn | 2.6824963  | 1.6857694  | -1.1630276 |
| Br | 4.5164363  | 2.7951537  | -0.2530858 |
| C  | -5.9612214 | 4.1742756  | 0.9212372  |
| C  | -5.0388647 | 3.4412955  | 0.1638310  |
| C  | -3.7621593 | 3.1484947  | 0.6891936  |
| C  | -3.4345327 | 3.5801024  | 1.9901476  |
| C  | -4.3591766 | 4.3167815  | 2.7463761  |
| C  | -5.6223484 | 4.6205212  | 2.2127412  |
| H  | -6.9563994 | 4.3968579  | 0.5061767  |
| H  | -5.2920944 | 3.0720947  | -0.8416008 |
| C  | -2.7821584 | 2.3617155  | -0.1179464 |
| H  | -2.4661729 | 3.2943976  | 2.4299037  |
| H  | -4.0959198 | 4.6460283  | 3.7635074  |
| H  | -6.3487135 | 5.1957332  | 2.8070704  |
| O  | -3.2451835 | 1.5947149  | -1.0443594 |
| C  | -1.8231419 | 3.9661412  | -1.0523331 |
| C  | -1.1398328 | 3.3328612  | -2.1265637 |
| O  | 0.2676705  | 3.1939850  | -1.6799316 |
| C  | 0.4605617  | 3.8352159  | -0.5247774 |
| C  | -0.7703381 | 4.4839317  | -0.1066832 |
| O  | 1.1917511  | 2.5887623  | -2.2484701 |
| C  | -1.6250455 | 2.7230332  | -3.2888261 |
| H  | -0.6105693 | 5.5805696  | -0.1802958 |
| H  | -0.9238986 | 4.2307496  | 0.9626350  |
| Zn | -2.1669794 | 0.7371065  | -2.4400134 |
| Br | -3.0635147 | -1.0315880 | -3.6670904 |
| C  | -0.5094016 | -1.9030502 | 1.4034066  |
| C  | -0.3230061 | -3.1287905 | 0.7386857  |
| C  | -0.1442168 | -4.3096849 | 1.5600594  |
| C  | 0.2376990  | -5.5783561 | 1.0234748  |
| C  | -0.3073011 | -4.2127506 | 2.9911922  |
| C  | -0.1749782 | -5.3822433 | 3.7990721  |
| C  | -0.5332398 | -2.9403147 | 3.5849337  |
| H  | -0.6278282 | -2.8698232 | 4.6796688  |
| C  | -0.5857095 | -1.7806261 | 2.8244321  |
| C  | 1.1387068  | -2.4673830 | -2.7565554 |
| C  | 0.5573762  | -3.4965050 | -3.4931778 |
| H  | 0.8498084  | -3.6640694 | -4.5381590 |
| C  | -0.4688618 | -4.3257605 | -2.9490715 |
| C  | -1.1369340 | -5.2842326 | -3.7689218 |
| C  | -0.8858672 | -4.1706289 | -1.5750077 |
| C  | -1.9928314 | -4.9357209 | -1.1066558 |
| C  | -0.1751269 | -3.2299986 | -0.7463905 |
| C  | 0.7524406  | -2.4054538 | -1.3787282 |
| O  | -0.6892671 | -0.7023295 | 0.7137460  |
| O  | 1.3419637  | -1.4133240 | -0.6128235 |
| P  | 0.3802532  | -0.1085814 | -0.3759724 |
| O  | 1.3556923  | 0.9502256  | 0.1727059  |
| O  | -0.4089300 | 0.2785774  | -1.6170076 |
| C  | 0.1526295  | -6.6056578 | 3.2359284  |
| C  | 0.3805934  | -6.6939669 | 1.8371659  |
| H  | -0.3198138 | -5.2856203 | 4.8865546  |
| H  | 0.2582370  | -7.4993962 | 3.8694090  |
| H  | 0.4355407  | -5.6716396 | -0.0519770 |
| H  | 0.6810917  | -7.6544467 | 1.3912074  |
| C  | -2.6368806 | -5.8410798 | -1.9392684 |

TS2-8-a; COSMO

|   |            |            |            |
|---|------------|------------|------------|
| C | -2.1976693 | -6.0300994 | -3.2766936 |
| H | -2.3404719 | -4.7922748 | -0.0736029 |
| H | -3.4980645 | -6.4128120 | -1.5610764 |
| H | -2.7116353 | -6.7556697 | -3.9253247 |
| H | -0.8081087 | -5.4027526 | -4.8133987 |
| C | 0.5210333  | 0.3005272  | 3.7088521  |
| C | -0.6779564 | -0.4277268 | 3.4611855  |
| C | 0.4227222  | 1.5528619  | 4.3359593  |
| C | -1.9378356 | 0.1114207  | 3.8265399  |
| C | -1.9785755 | 1.3755421  | 4.4527212  |
| C | -0.8111658 | 2.1095807  | 4.7245318  |
| H | 1.3441929  | 2.1167391  | 4.5496976  |
| C | -3.2305496 | -0.6479759 | 3.5267307  |
| H | -2.9560385 | 1.7849597  | 4.7444995  |
| C | -3.8377912 | -0.2079705 | 2.1801041  |
| H | -4.1572459 | 0.8531818  | 2.2205622  |
| H | -4.7303394 | -0.8199062 | 1.9341315  |
| H | -3.1143425 | -0.3083546 | 1.3477975  |
| C | -4.2690104 | -0.5498586 | 4.6553923  |
| H | -2.9588429 | -1.7194303 | 3.4265069  |
| H | -4.6768001 | 0.4778650  | 4.7551054  |
| H | -3.8382904 | -0.8407230 | 5.6351140  |
| H | -5.1289421 | -1.2177871 | 4.4444068  |
| C | -0.8160154 | 3.4727665  | 5.4157347  |
| C | -0.5305091 | 4.6105392  | 4.4136683  |
| H | -0.4023136 | 5.5791833  | 4.9393856  |
| H | -1.3691849 | 4.7299352  | 3.6965768  |
| H | 0.3894749  | 4.4147280  | 3.8267880  |
| C | -2.0828481 | 3.7602383  | 6.2304195  |
| H | 0.0388746  | 3.4544762  | 6.1289705  |
| H | -1.9771295 | 4.7115554  | 6.7898717  |
| H | -2.2931311 | 2.9531681  | 6.9608669  |
| H | -2.9763426 | 3.8622472  | 5.5795733  |
| C | 1.8937206  | -0.2866219 | 3.3750456  |
| C | 2.9481585  | 0.7689522  | 3.0097960  |
| H | 3.8573357  | 0.2762829  | 2.6097409  |
| H | 3.2653274  | 1.3610709  | 3.8936109  |
| H | 2.5766837  | 1.4621697  | 2.2328232  |
| C | 2.3996710  | -1.1737904 | 4.5307180  |
| H | 1.7660377  | -0.9428491 | 2.4872441  |
| H | 3.3836114  | -1.6211830 | 4.2785936  |
| H | 1.6979248  | -2.0003296 | 4.7561452  |
| H | 2.5241238  | -0.5719653 | 5.4553413  |
| H | 4.1363855  | 2.2192057  | -5.6116548 |
| H | 5.8186303  | -1.7937174 | -2.7065853 |
| H | 0.2063298  | -2.2716487 | -7.1199332 |
| C | 4.1650193  | 2.2856832  | -4.5007520 |
| H | 4.8499803  | -1.9660989 | 0.3476845  |
| H | 3.9779270  | 4.4622611  | -4.6036157 |
| H | -1.2542853 | -0.2609741 | -6.4669191 |
| C | 3.3985905  | 1.0572666  | -4.0170621 |
| C | 5.0684504  | -2.5471276 | -2.3882755 |
| C | 3.4675911  | 3.6064944  | -4.1164849 |
| H | 3.5087844  | 3.7682575  | -3.0198249 |
| C | 3.7991680  | 0.2844007  | -2.8948756 |
| C | 1.0244204  | -1.8529480 | -6.4983979 |
| H | 6.1586061  | 1.3609231  | -4.3447990 |
| C | 2.2963933  | 0.5923956  | -4.7466512 |
| C | 5.6384320  | 2.3010542  | -4.0701739 |
| H | 6.1694380  | 3.1405539  | -4.5621932 |
| H | 1.9890088  | 1.1618066  | -5.6368733 |
| C | 4.4015345  | -1.2120965 | -0.3301438 |
| H | 5.5834353  | -3.2891313 | -1.7442114 |
| H | 4.7062408  | -3.0706242 | -3.2961348 |
| C | 3.1670905  | -0.9487792 | -2.5733265 |
| C | -0.3889791 | 0.1468004  | -5.9084778 |
| C | 1.5807248  | -0.5752540 | -4.4143974 |
| H | 1.6523235  | -2.6926981 | -6.1389487 |
| H | 1.6664177  | -1.2280004 | -7.1540844 |
| C | 3.9045009  | -1.8863992 | -1.6176438 |
| C | 1.9941042  | -1.3531890 | -3.2841422 |

|   |            |            |            |
|---|------------|------------|------------|
| C | 0.4483304  | -1.0071535 | -5.3419180 |
| H | 3.5705519  | -0.7233681 | 0.2151216  |
| H | -0.8016400 | 0.7699902  | -5.0952208 |
| H | 5.1794124  | -0.4453243 | -0.5244330 |
| H | 2.4029106  | 3.6119073  | -4.4208031 |
| H | 0.1839193  | 0.7956275  | -6.6026203 |
| H | 5.7361848  | 2.4479016  | -2.9745232 |
| H | 3.2136090  | -2.7016298 | -1.3286361 |
| H | -0.2516435 | -1.6342860 | -4.7526556 |
| H | 4.7584249  | 0.5156812  | -2.4072885 |
| H | -2.6063122 | 3.0295496  | -3.6847199 |
| H | -0.8751147 | 2.3855277  | -4.0230392 |
| H | -2.7413137 | 4.5450450  | -1.2194471 |
| H | -1.8706008 | 2.0393179  | 0.4461926  |

### TS2-8-a

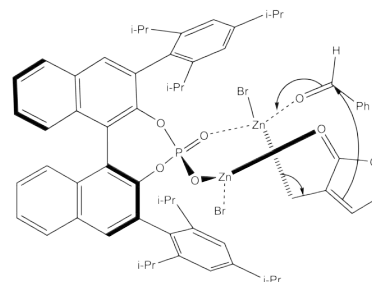

Energy(Hartree)= -11970.01295354  
number of imaginary frequencies: 1

|    |            |            |            |
|----|------------|------------|------------|
| Zn | 2.6846410  | 1.7069759  | -1.1394148 |
| Br | 4.5503262  | 2.7785232  | -0.2773496 |
| C  | -5.9581340 | 4.1561860  | 0.9282308  |
| C  | -5.0355369 | 3.4239332  | 0.1710501  |
| C  | -3.7569353 | 3.1366461  | 0.6940462  |
| C  | -3.4287829 | 3.5698669  | 1.9940260  |
| C  | -4.3542665 | 4.3057436  | 2.7499238  |
| C  | -5.6184045 | 4.6060554  | 2.2176030  |
| H  | -6.9553130 | 4.3738953  | 0.5153295  |
| H  | -5.2881373 | 3.0460392  | -0.8312064 |
| C  | -2.7757070 | 2.3541325  | -0.1176688 |
| H  | -2.4601876 | 3.2847010  | 2.4339186  |
| H  | -4.0895683 | 4.6361771  | 3.7662316  |
| H  | -6.3454249 | 5.1805059  | 2.8118368  |
| O  | -3.2401650 | 1.5920675  | -1.0460403 |
| C  | -1.8243918 | 3.9585602  | -1.0435282 |
| C  | -1.1398443 | 3.3324578  | -2.1230012 |
| C  | 0.2684790  | 3.1963203  | -1.6790327 |
| O  | 0.4603511  | 3.8350930  | -0.5205582 |
| C  | -0.7710229 | 4.4742967  | -0.0966815 |
| O  | 1.1968725  | 2.5994811  | -2.2481299 |
| C  | -1.6260140 | 2.7253827  | -3.2842406 |
| H  | -0.6150556 | 5.5727887  | -0.1606834 |
| H  | -0.9233279 | 4.2125883  | 0.9709136  |
| Zn | -2.1810758 | 0.7225956  | -2.4474689 |
| Br | -3.0580791 | -1.0042742 | -3.7255851 |
| C  | -0.5077438 | -1.8932584 | 1.4009888  |
| C  | -0.3203428 | -3.1194079 | 0.7376217  |
| C  | -0.1395407 | -4.2994456 | 1.5594915  |
| C  | 0.2409027  | -5.5683176 | 1.0231312  |
| C  | -0.3004866 | -4.2016430 | 2.9906002  |
| C  | -0.1666592 | -5.3705662 | 3.7982722  |
| C  | -0.5268770 | -2.9288763 | 3.5827170  |
| H  | -0.6200621 | -2.8556491 | 4.6774512  |
| C  | -0.5825384 | -1.7696319 | 2.8219065  |
| C  | 1.1341943  | -2.4624722 | -2.7615573 |
| C  | 0.5477307  | -3.4905804 | -3.4951892 |

|   |            |            |            |   |            |            |            |
|---|------------|------------|------------|---|------------|------------|------------|
| H | 0.8361970  | -3.6577244 | -4.5411940 | C | 3.4932611  | 3.5912669  | -4.1207745 |
| C | -0.4780941 | -4.3179192 | -2.9484292 | H | 3.5379714  | 3.7488518  | -3.0237847 |
| C | -1.1505739 | -5.2755320 | -3.7649000 | C | 3.8129207  | 0.2688123  | -2.9082703 |
| C | -0.8896151 | -4.1619896 | -1.5731010 | C | 1.0170398  | -1.8571218 | -6.5052449 |
| C | -1.9952463 | -4.9258661 | -1.1002797 | H | 6.1778530  | 1.3397827  | -4.3574156 |
| C | -0.1752801 | -3.2215140 | -0.7476015 | C | 2.3120034  | 0.5840696  | -4.7584177 |
| C | 0.7509979  | -2.3976416 | -1.3829459 | C | 5.6605752  | 2.2809545  | -4.0808771 |
| O | -0.6903533 | -0.6943276 | 0.7102835  | H | 6.1945135  | 3.1192800  | -4.5716584 |
| O | 1.3410779  | -1.4032585 | -0.6196747 | H | 2.0079176  | 1.1545423  | -5.6491046 |
| P | 0.3760876  | -0.1007512 | -0.3827156 | C | 4.3999138  | -1.2215235 | -0.3356931 |
| O | 1.3460148  | 0.9609525  | 0.1708401  | H | 5.5709238  | -3.3133221 | -1.7397904 |
| O | -0.4138382 | 0.2847566  | -1.6230905 | H | 4.6980161  | -3.0938294 | -3.2937138 |
| C | 0.1592175  | -6.5940756 | 3.2357007  | C | 3.1726353  | -0.9576138 | -2.5835904 |
| C | 0.3842583  | -6.6831914 | 1.8370948  | C | -0.3745809 | 0.1579225  | -5.9218705 |
| H | -0.3093843 | -5.2732779 | 4.8859876  | C | 1.5881376  | -0.5777506 | -4.4251027 |
| H | 0.2656421  | -7.4873450 | 3.8697399  | H | 1.6383586  | -2.7013775 | -6.1448283 |
| H | 0.4355521  | -5.6614128 | -0.0528773 | H | 1.6648427  | -1.2415001 | -7.1640036 |
| H | 0.6829130  | -7.6441071 | 1.3909960  | C | 3.9013251  | -1.8968297 | -1.6220573 |
| C | -2.6427962 | -5.8307236 | -1.9298802 | C | 1.9961098  | -1.3553202 | -3.2928468 |
| C | -2.2094083 | -6.0202656 | -3.2685004 | C | 0.4512955  | -1.0019823 | -5.3509276 |
| H | -2.3381964 | -4.7806043 | -0.0660764 | H | 3.5710532  | -0.7253190 | 0.2059005  |
| H | -3.5034991 | -6.4007832 | -1.5483742 | H | -0.7819947 | 0.7868697  | -5.1106121 |
| H | -2.7273518 | -6.7443891 | -3.9154063 | H | 5.1829438  | -0.4597327 | -0.5284505 |
| H | -0.8271186 | -5.3930242 | -4.8111152 | H | 2.4280698  | 3.6002351  | -4.4233100 |
| C | 0.5153919  | 0.3168441  | 3.7054562  | H | 0.2043504  | 0.7986562  | -6.6188480 |
| C | -0.6799744 | -0.4176454 | 3.4596500  | H | 5.7589279  | 2.4270311  | -2.9852909 |
| C | 0.4111859  | 1.5652538  | 4.3388774  | H | 3.2036191  | -2.7058314 | -1.3315624 |
| C | -1.9418609 | 0.1118746  | 3.8317208  | H | -0.2566485 | -1.6185014 | -4.7597573 |
| C | -1.9881445 | 1.3731063  | 4.4626995  | H | 4.7665375  | 0.5031147  | -2.4119185 |
| C | -0.8244362 | 2.1124669  | 4.7339699  | H | -2.6094854 | 3.0275675  | -3.6772264 |
| H | 1.3303256  | 2.1331948  | 4.5515210  | H | -0.8800871 | 2.3811833  | -4.0189630 |
| C | -3.2310950 | -0.6534768 | 3.5321347  | H | -2.7442866 | 4.5360051  | -1.2062118 |
| H | -2.9672439 | 1.7749553  | 4.7590989  | H | -1.8642856 | 2.0294245  | 0.4460856  |
| C | -3.8430188 | -0.2137634 | 2.1875894  |   |            |            |            |
| H | -4.1709144 | 0.8446386  | 2.2307853  |   |            |            |            |
| H | -4.7313450 | -0.8307839 | 1.9399809  |   |            |            |            |
| H | -3.1208566 | -0.3074317 | 1.3535283  |   |            |            |            |
| C | -4.2679116 | -0.5640155 | 4.6629474  |   |            |            |            |
| H | -2.9536940 | -1.7232745 | 3.4290972  |   |            |            |            |
| H | -4.6821079 | 0.4608344  | 4.7656706  |   |            |            |            |
| H | -3.8343922 | -0.8543470 | 5.6415079  |   |            |            |            |
| H | -5.1247479 | -1.2358594 | 4.4522691  |   |            |            |            |
| C | -0.8348938 | 3.4716250  | 5.4331415  |   |            |            |            |
| C | -0.5558554 | 4.6171902  | 4.4384351  |   |            |            |            |
| H | -0.4310575 | 5.5837563  | 4.9690648  |   |            |            |            |
| H | -1.3958068 | 4.7365712  | 3.7229929  |   |            |            |            |
| H | 0.3641007  | 4.4289150  | 3.8491918  |   |            |            |            |
| C | -2.1018437 | 3.7481578  | 6.2511774  |   |            |            |            |
| H | 0.0203419  | 3.4525767  | 6.1460194  |   |            |            |            |
| H | -2.0010251 | 4.6959263  | 6.8175232  |   |            |            |            |
| H | -2.3080048 | 2.9351511  | 6.9758517  |   |            |            |            |
| H | -2.9962378 | 3.8500094  | 5.6016349  |   |            |            |            |
| C | 1.8906450  | -0.2591693 | 3.3631295  |   |            |            |            |
| C | 2.9376407  | 0.8053071  | 3.0028340  |   |            |            |            |
| H | 3.8497580  | 0.3228033  | 2.5975664  |   |            |            |            |
| H | 3.2539331  | 1.3931583  | 3.8896841  |   |            |            |            |
| H | 2.5619382  | 1.5030841  | 2.2321484  |   |            |            |            |
| C | 2.4058332  | -1.1521750 | 4.5100558  |   |            |            |            |
| H | 1.7642693  | -0.9096183 | 2.4709520  |   |            |            |            |
| H | 3.3916437  | -1.5911442 | 4.2511588  |   |            |            |            |
| H | 1.7107994  | -1.9853365 | 4.7310242  |   |            |            |            |
| H | 2.5294862  | -0.5573292 | 5.4391175  |   |            |            |            |
| H | 4.1574065  | 2.2066635  | -5.6221887 |   |            |            |            |
| H | 5.8183654  | -1.8236561 | -2.7071660 |   |            |            |            |
| H | 0.1945349  | -2.2699332 | -7.1247840 |   |            |            |            |
| C | 4.1869677  | 2.2701441  | -4.5108318 |   |            |            |            |
| H | 4.8405994  | -1.9760978 | 0.3466659  |   |            |            |            |
| H | 4.0041383  | 4.4485483  | -4.6047885 |   |            |            |            |
| H | -1.2452211 | -0.2425791 | -6.4768107 |   |            |            |            |
| C | 3.4169317  | 1.0429979  | -4.0291827 |   |            |            |            |
| C | 5.0618445  | -2.5698219 | -2.3869096 |   |            |            |            |

### int1-8-a; COSMO

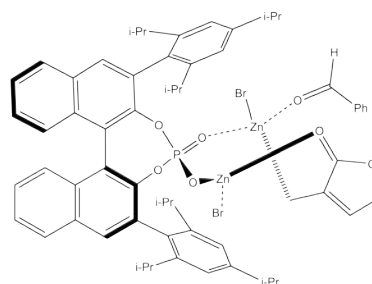

Energy(Hartree) = -11970.03103715

|    |            |           |            |
|----|------------|-----------|------------|
| Zn | 3.5268739  | 0.8357513 | -0.0828154 |
| Br | 5.6856067  | 0.1155928 | 0.0507512  |
| C  | -3.3843101 | 5.7074621 | 1.2482548  |
| C  | -2.4268814 | 4.7024901 | 1.0799633  |
| C  | -2.3378810 | 3.6481160 | 2.0195887  |
| C  | -3.2261613 | 3.6144886 | 3.1194864  |
| C  | -4.1888557 | 4.6172516 | 3.2812720  |
| C  | -4.2656644 | 5.6646091 | 2.3454920  |
| H  | -3.4551348 | 6.5253438 | 0.5157719  |
| H  | -1.7452125 | 4.7222676 | 0.2184796  |
| C  | -1.3495291 | 2.5729379 | 1.8837967  |
| H  | -3.1528884 | 2.7844244 | 3.8366406  |
| H  | -4.8820711 | 4.5855048 | 4.1352482  |
| H  | -5.0216562 | 6.4553523 | 2.4698561  |
| O  | -0.5863610 | 2.4237319 | 0.9205384  |
| C  | 1.1682662  | 5.1119769 | 1.1188587  |
| C  | 1.3408334  | 4.4617720 | -0.0783158 |
| C  | 2.3641483  | 3.4386591 | 0.1931575  |
| O  | 2.7471839  | 3.4379051 | 1.4776947  |
| C  | 2.0144471  | 4.4774480 | 2.1698077  |
| O  | 2.8575857  | 2.6329761 | -0.6217656 |
| C  | 0.6374533  | 4.4816187 | -1.3571717 |

|    |            |            |            |   |            |            |            |
|----|------------|------------|------------|---|------------|------------|------------|
| H  | 2.7576664  | 5.1510386  | 2.6495153  | H | 2.2929094  | 0.8207793  | 2.8770473  |
| H  | 1.4288692  | 3.9866750  | 2.9804967  | C | 1.8449616  | -2.4141406 | 4.1520471  |
| Zn | -0.6427303 | 2.8764940  | -1.2632703 | H | 1.3933019  | -1.4821433 | 2.2633235  |
| Br | -2.9195647 | 2.5857423  | -1.8254199 | H | 2.8243515  | -2.8226725 | 3.8274521  |
| C  | -0.9104678 | -1.8866169 | 0.6665659  | H | 1.0885234  | -3.2163602 | 4.0413916  |
| C  | -1.0386175 | -2.8960777 | -0.3018288 | H | 1.9186055  | -2.1630541 | 5.2311691  |
| C  | -1.1506021 | -4.2642407 | 0.1485919  | H | 4.9357002  | 2.3249880  | -5.3156277 |
| C  | -1.0971429 | -5.3794150 | -0.7433399 | H | 4.7598759  | -3.2455747 | -4.5211041 |
| C  | -1.2742096 | -4.5337970 | 1.5597867  | H | -1.1785139 | 1.1467921  | -6.7497574 |
| C  | -1.4002716 | -5.8821348 | 2.0115447  | C | 5.0698339  | 1.7348124  | -4.3808384 |
| C  | -1.2534182 | -3.4484261 | 2.4774572  | H | 3.9303266  | -3.9358486 | -1.5021380 |
| H  | -1.3925701 | -3.6551861 | 3.5501058  | H | 5.8340978  | 3.4897646  | -3.2965331 |
| C  | -1.0552564 | -2.1341780 | 2.0666020  | H | -1.1056255 | 2.8255597  | -4.7324971 |
| C  | 0.3640550  | -1.6703520 | -3.6558846 | C | 3.8829820  | 0.7798029  | -4.3000486 |
| C  | -0.5697921 | -2.1792352 | -4.5502397 | C | 3.7493003  | -3.6362848 | -4.2787360 |
| H  | -0.4052498 | -2.0669591 | -5.6318112 | C | 5.0321889  | 2.7283421  | -3.2011174 |
| C  | -1.7671928 | -2.8170475 | -4.1065455 | H | 5.1871706  | 2.1926274  | -2.2411266 |
| C  | -2.7557708 | -3.2527445 | -5.0394841 | C | 3.9896488  | -0.5259882 | -3.7926373 |
| C  | -2.0057305 | -3.0078824 | -2.6944319 | C | -0.1728648 | 0.7726694  | -6.4662707 |
| C  | -3.2464537 | -3.5790251 | -2.2839845 | H | 6.4719736  | 0.2911071  | -5.2750626 |
| C  | -0.9896731 | -2.5902182 | -1.7610445 | C | 2.6082760  | 1.2236739  | -4.6960723 |
| C  | 0.1079811  | -1.8998414 | -2.2686967 | C | 6.4339783  | 1.0368244  | -4.4552527 |
| O  | -0.7148653 | -0.5613057 | 0.2859975  | H | 7.2389331  | 1.7795188  | -4.6286102 |
| O  | 1.0474249  | -1.4271420 | -1.3620247 | H | 2.5142795  | 2.2415434  | -5.1063563 |
| P  | 0.6288460  | -0.0748412 | -0.5326144 | C | 3.8748883  | -2.8845020 | -1.8522533 |
| O  | 1.8247238  | 0.1007253  | 0.4352473  | H | 3.8617830  | -4.6940583 | -3.9618144 |
| O  | 0.2565145  | 1.0640899  | -1.4637502 | H | 3.1490015  | -3.6171634 | -5.2110306 |
| C  | -1.3727371 | -6.9387219 | 1.1144943  | C | 2.8680268  | -1.3658070 | -3.6513800 |
| C  | -1.2039673 | -6.6807622 | -0.2724913 | C | -0.0461784 | 2.5119627  | -4.6491129 |
| H  | -1.5063570 | -6.0658762 | 3.0923127  | C | 1.4510536  | 0.4379619  | -4.5538194 |
| H  | -1.4645065 | -7.9749927 | 1.4739399  | H | -0.1184613 | -0.3005356 | -6.7347052 |
| H  | -0.9534823 | -5.2022822 | -1.8177003 | H | 0.5774835  | 1.3053008  | -7.0879200 |
| H  | -1.1501802 | -7.5207452 | -0.9818594 | C | 3.0835812  | -2.7998815 | -3.1679617 |
| C  | -4.1942161 | -3.9755378 | -3.2180859 | C | 1.5812623  | -0.8745528 | -4.0108649 |
| C  | -3.9440943 | -3.8243386 | -4.6081904 | C | 0.0987349  | 1.0161999  | -4.9682186 |
| H  | -3.4515803 | -3.6937576 | -1.2100255 | H | 3.3913804  | -2.2847012 | -1.0570164 |
| H  | -5.1488482 | -4.4052835 | -2.8779881 | H | 0.2903142  | 2.7288030  | -3.6174114 |
| H  | -4.6998834 | -4.1478832 | -5.3400325 | H | 4.9158594  | -2.5181851 | -1.9654762 |
| H  | -2.5618020 | -3.1108905 | -6.1143958 | H | 4.0577524  | 3.2516281  | -3.1355242 |
| C  | 0.1103223  | -0.6282229 | 3.7445206  | H | 0.5495974  | 3.1495322  | -5.3353062 |
| C  | -1.0849275 | -1.0491241 | 3.1046043  | H | 6.6727404  | 0.5145185  | -3.5052414 |
| C  | 0.0149857  | 0.2465795  | 4.8459950  | H | 2.0876364  | -3.2513813 | -2.9830098 |
| C  | -2.3483771 | -0.5543577 | 3.5448795  | H | -0.6795967 | 0.4865480  | -4.3810014 |
| C  | -2.3873648 | 0.2938346  | 4.6691201  | H | 4.9754664  | -0.9118165 | -3.4955255 |
| C  | -1.2184429 | 0.6926577  | 5.3479297  | H | 0.0662654  | 5.4120698  | -1.5344463 |
| H  | 0.9360555  | 0.5605327  | 5.3619705  | H | 1.3161871  | 4.2744580  | -2.2079092 |
| C  | -3.6300763 | -0.9092240 | 2.7897516  | H | 0.4702948  | 5.9329576  | 1.3294009  |
| H  | -3.3653560 | 0.6348612  | 5.0418986  | H | -1.2883050 | 1.8470093  | 2.7336043  |
| C  | -3.8514816 | 0.0554412  | 1.6043378  |   |            |            |            |
| H  | -4.0637801 | 1.0830396  | 1.9661730  |   |            |            |            |
| H  | -4.7202648 | -0.2671089 | 0.9946099  |   |            |            |            |
| H  | -2.9730623 | 0.1134047  | 0.9329723  |   |            |            |            |
| C  | -4.8800563 | -0.9742140 | 3.6789821  |   |            |            |            |
| H  | -3.4813159 | -1.9220834 | 2.3604577  |   |            |            |            |
| H  | -5.1779796 | 0.0282590  | 4.0520210  |   |            |            |            |
| H  | -4.7276107 | -1.6334827 | 4.5576811  |   |            |            |            |
| H  | -5.7393947 | -1.3673805 | 3.0990825  |   |            |            |            |
| C  | -1.2744066 | 1.5186255  | 6.6290049  |   |            |            |            |
| C  | -2.0085428 | 2.8588244  | 6.4631653  |   |            |            |            |
| H  | -1.9614015 | 3.4487479  | 7.4015094  |   |            |            |            |
| H  | -3.0834519 | 2.7090748  | 6.2276257  |   |            |            |            |
| H  | -1.5648551 | 3.4712821  | 5.6526209  |   |            |            |            |
| C  | -1.8818306 | 0.6929668  | 7.7792332  |   |            |            |            |
| H  | -0.2214686 | 1.7493698  | 6.9029934  |   |            |            |            |
| H  | -1.8621986 | 1.2636094  | 8.7308782  |   |            |            |            |
| H  | -1.3255450 | -0.2536186 | 7.9322044  |   |            |            |            |
| H  | -2.9391244 | 0.4304701  | 7.5646677  |   |            |            |            |
| C  | 1.4744900  | -1.1688186 | 3.3229698  |   |            |            |            |
| C  | 2.5917478  | -0.1143505 | 3.3906150  |   |            |            |            |
| H  | 3.5078841  | -0.4985961 | 2.8960519  |   |            |            |            |
| H  | 2.8691369  | 0.1356727  | 4.4360500  |   |            |            |            |

int1-8-a

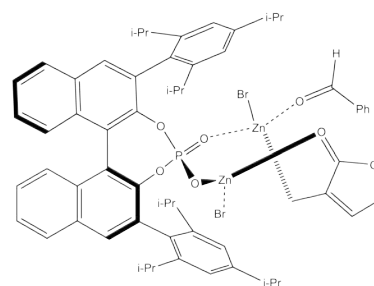

Energy(Hartree)= -11970.01858397

|    |            |           |           |
|----|------------|-----------|-----------|
| Zn | 3.5367269  | 0.7764620 | 0.0884470 |
| Br | 5.6725999  | 0.0563224 | 0.3795824 |
| C  | -3.2926079 | 5.7572097 | 1.2666167 |
| C  | -2.3502926 | 4.7382302 | 1.0966055 |
| C  | -2.2641070 | 3.6925601 | 2.0455388 |
| C  | -3.1404038 | 3.6803124 | 3.1546464 |
| C  | -4.0849753 | 4.6992947 | 3.3199991 |
| C  | -4.1590369 | 5.7384670 | 2.3753636 |

|    |            |            |            |   |            |            |            |
|----|------------|------------|------------|---|------------|------------|------------|
| H  | -3.3651960 | 6.5648982  | 0.5231183  | C | -1.3927763 | 1.4639017  | 6.6738291  |
| H  | -1.6829390 | 4.7355039  | 0.2241399  | C | -2.1515280 | 2.7946500  | 6.5523155  |
| C  | -1.2928954 | 2.6008475  | 1.9069798  | H | -2.1413581 | 3.3403535  | 7.5180857  |
| H  | -3.0725873 | 2.8526551  | 3.8750237  | H | -3.2168709 | 2.6351340  | 6.2820761  |
| H  | -4.7672723 | 4.6851567  | 4.1832731  | H | -1.7014689 | 3.4548740  | 5.7842085  |
| H  | -4.9030696 | 6.5404065  | 2.5008131  | C | -1.9938105 | 0.5837023  | 7.7866917  |
| O  | -0.5299360 | 2.4463734  | 0.9455852  | H | -0.3473715 | 1.7051263  | 6.9678443  |
| C  | 1.2131725  | 5.1338417  | 1.0885286  | H | -1.9962579 | 1.1172764  | 8.7597953  |
| C  | 1.4047520  | 4.4452516  | -0.0848835 | H | -1.4198877 | -0.3564954 | 7.9087230  |
| C  | 2.4005324  | 3.4096130  | 0.2454397  | H | -3.0424225 | 0.3064969  | 7.5499013  |
| O  | 2.7396613  | 3.4350682  | 1.5441856  | C | 1.4295167  | -1.1581705 | 3.3815847  |
| C  | 2.0065621  | 4.5045270  | 2.1836079  | C | 2.5359948  | -0.0926034 | 3.4578643  |
| O  | 2.9106574  | 2.5771046  | -0.5283811 | H | 3.4648436  | -0.4710839 | 2.9827654  |
| C  | 0.7399130  | 4.4431528  | -1.3809034 | H | 2.7950598  | 0.1699188  | 4.5050517  |
| H  | 2.7482872  | 5.1712088  | 2.6766646  | H | 2.2356313  | 0.8359131  | 2.9329517  |
| H  | 1.3796096  | 4.0447323  | 2.9822773  | C | 1.7990051  | -2.3946211 | 4.2234176  |
| Zn | -0.6060182 | 2.8885082  | -1.2710353 | H | 1.3661029  | -1.4779984 | 2.3228282  |
| Br | -2.8908479 | 2.6668499  | -1.7683407 | H | 2.7874723  | -2.7947819 | 3.9170122  |
| C  | -0.9233351 | -1.8821568 | 0.6669830  | H | 1.0531424  | -3.2052412 | 4.1039043  |
| C  | -1.0285457 | -2.9045977 | -0.2907295 | H | 1.8524364  | -2.1385810 | 5.3025168  |
| C  | -1.1288374 | -4.2687667 | 0.1733979  | H | 4.6792521  | 2.6512199  | -5.0885658 |
| C  | -1.0543579 | -5.3925296 | -0.7056963 | H | 4.8103035  | -3.1554057 | -4.4985136 |
| C  | -1.2641960 | -4.5243711 | 1.5858230  | H | -1.2552419 | 1.0922577  | -6.7457117 |
| C  | -1.3803981 | -5.8687640 | 2.0502225  | C | 5.0084411  | 1.8066765  | -4.4430034 |
| C  | -1.2642958 | -3.4287217 | 2.4908934  | H | 4.0207238  | -3.8170713 | -1.4640938 |
| H  | -1.4114591 | -3.6238362 | 3.5646667  | H | 6.1625677  | 3.1347582  | -3.1226081 |
| C  | -1.0761601 | -2.1166739 | 2.0682709  | H | -1.2069225 | 2.7675548  | -4.7161053 |
| C  | 0.3784464  | -1.6809627 | -3.6444963 | C | 3.8293929  | 0.8470709  | -4.3446973 |
| C  | -0.5415621 | -2.2132374 | -4.5395606 | C | 3.8116819  | -3.5677286 | -4.2434693 |
| H  | -0.3723240 | -2.1020643 | -5.6204793 | C | 5.3447070  | 2.3872412  | -3.0554247 |
| C  | -1.7297089 | -2.8693180 | -4.0999716 | H | 5.6760099  | 1.5893278  | -2.3573185 |
| C  | -2.7046328 | -3.3287581 | -5.0351578 | C | 3.9725863  | -0.4457595 | -3.8100457 |
| C  | -1.9740832 | -3.0522471 | -2.6882442 | C | -0.2411037 | 0.7364234  | -6.4694495 |
| C  | -3.2084754 | -3.6390868 | -2.2815079 | H | 6.0053900  | 0.7540698  | -6.0979316 |
| C  | -0.9701107 | -2.6119660 | -1.7521858 | C | 2.5441888  | 1.2531128  | -4.7363496 |
| C  | 0.1215570  | -1.9091598 | -2.2571801 | C | 6.2457902  | 1.1745816  | -5.1006620 |
| O  | -0.7396204 | -0.5607068 | 0.2698238  | H | 7.0495662  | 1.9285403  | -5.2280956 |
| O  | 1.0527959  | -1.4248449 | -1.3484622 | H | 2.4231978  | 2.2619417  | -5.1611200 |
| P  | 0.6260860  | -0.0773482 | -0.5160088 | C | 3.9307979  | -2.7736477 | -1.8299203 |
| O  | 1.7934673  | 0.0761514  | 0.4885907  | H | 3.9530309  | -4.6173792 | -3.9116290 |
| O  | 0.2828428  | 1.0705912  | -1.4456003 | H | 3.2065827  | -3.5776857 | -5.1726021 |
| C  | -1.3323505 | -6.9341669 | 1.1654517  | C | 2.8765057  | -1.3110172 | -3.6472611 |
| C  | -1.1523824 | -6.6892741 | -0.2219213 | C | -0.1388645 | 2.4798576  | -4.6565562 |
| H  | -1.4952037 | -6.0420123 | 3.1318281  | C | 1.4065031  | 0.4410688  | -4.5693028 |
| H  | -1.4159901 | -7.9673674 | 1.5353900  | H | -0.1695668 | -0.3357751 | -6.7374877 |
| H  | -0.9027198 | -5.2239033 | -1.7802266 | H | 0.4948932  | 1.2805445  | -7.0980241 |
| H  | -1.0829390 | -7.5360368 | -0.9216988 | C | 3.1309489  | -2.7311789 | -3.1421048 |
| C  | -4.1424922 | -4.0594488 | -3.2182597 | C | 1.5742929  | -0.8577354 | -4.0083366 |
| C  | -3.8856636 | -3.9163187 | -4.6073808 | C | 0.0375516  | 0.9867560  | -4.9739492 |
| H  | -3.4187703 | -3.7468769 | -1.2079974 | H | 3.4330908  | -2.1803897 | -1.0385986 |
| H  | -5.0921981 | -4.5017454 | -2.8806651 | H | 0.2133587  | 2.7090854  | -3.6326833 |
| H  | -4.6310514 | -4.2581556 | -5.3414766 | H | 4.9599537  | -2.3778183 | -1.9505226 |
| H  | -2.5061251 | -3.1911339 | -6.1097616 | H | 4.4611995  | 2.8782801  | -2.6004483 |
| C  | 0.0559156  | -0.6231090 | 3.7787270  | H | 0.4271717  | 3.1301536  | -5.3558866 |
| C  | -1.1245718 | -1.0275244 | 3.1018041  | H | 6.6636246  | 0.3549508  | -4.4799362 |
| C  | -0.0639024 | 0.2336843  | 4.8916780  | H | 2.1479302  | -3.2048807 | -2.9442293 |
| C  | -2.3945306 | -0.5237358 | 3.5103579  | H | -0.7247678 | 0.4415173  | -4.3803048 |
| C  | -2.4584951 | 0.3079944  | 4.6456864  | H | 4.9717570  | -0.7959073 | -3.5078686 |
| C  | -1.3072014 | 0.6804208  | 5.3675546  | H | 0.2042766  | 5.3830590  | -1.6101551 |
| H  | 0.8454505  | 0.5297827  | 5.4384885  | H | 1.4291455  | 4.1726644  | -2.2044991 |
| C  | -3.6566386 | -0.8522263 | 2.7125339  | H | 0.5254693  | 5.9733527  | 1.2540196  |
| H  | -3.4446098 | 0.6517235  | 4.9939601  | H | -1.2480905 | 1.8693752  | 2.7536520  |
| C  | -3.8532649 | 0.1584467  | 1.5619883  |   |            |            |            |
| H  | -4.0633829 | 1.1738965  | 1.9579573  |   |            |            |            |
| H  | -4.7142340 | -0.1323602 | 0.9261348  |   |            |            |            |
| H  | -2.9653332 | 0.2324986  | 0.9049233  |   |            |            |            |
| C  | -4.9253327 | -0.9568648 | 3.5712241  |   |            |            |            |
| H  | -3.4936478 | -1.8471857 | 2.2478866  |   |            |            |            |
| H  | -5.2377933 | 0.0296000  | 3.9739071  |   |            |            |            |
| H  | -4.7885960 | -1.6472128 | 4.4283349  |   |            |            |            |
| H  | -5.7701788 | -1.3319216 | 2.9591057  |   |            |            |            |

7.2.1.6 to 15j-mi  
TS1-8-j; COSMO

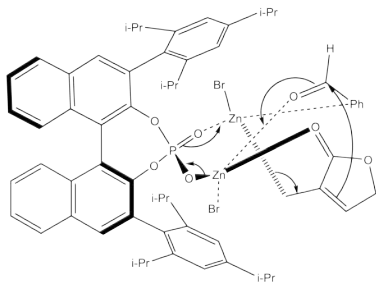

Energy(Hartree) = -11970.0167867

|    |            |            |            |
|----|------------|------------|------------|
| Zn | 2.3747331  | 0.8937930  | -1.9618140 |
| Br | 4.6548999  | 0.9989033  | -1.6240477 |
| C  | -2.3346835 | 2.6097525  | -2.2030598 |
| C  | -1.0548399 | 2.1833893  | -2.6228805 |
| C  | -0.7303308 | 2.1381556  | -4.0055946 |
| C  | -1.7232236 | 2.4774347  | -4.9481207 |
| C  | -2.9978815 | 2.8832859  | -4.5262444 |
| C  | -3.3067056 | 2.9542697  | -3.1574796 |
| H  | -2.5517293 | 2.6881477  | -1.1266341 |
| H  | -0.2586919 | 2.0161983  | -1.8821700 |
| C  | 0.6641593  | 1.8322181  | -4.4399195 |
| H  | -1.4863935 | 2.4491503  | -6.0239672 |
| H  | -3.7603222 | 3.1498251  | -5.2734667 |
| H  | -4.3100084 | 3.2648953  | -2.8332776 |
| O  | 1.6348734  | 1.7666052  | -3.5851473 |
| C  | 0.4747730  | 0.0472282  | -5.4418974 |
| C  | 0.1058877  | -0.8254523 | -4.3837864 |
| C  | 1.3962710  | -1.0518526 | -3.6633593 |
| O  | 2.4259283  | -0.8287676 | -4.5041210 |
| C  | 1.9336603  | -0.2357068 | -5.7296688 |
| O  | 1.5792572  | -1.2545988 | -2.4652696 |
| C  | -1.1283390 | -1.2933900 | -3.9226763 |
| H  | 2.0713907  | -0.9612387 | -6.5599615 |
| H  | 2.5600038  | 0.6581369  | -5.9228033 |
| Zn | -2.0234028 | -0.0640013 | -2.3875336 |
| Br | -4.3541751 | -0.3085241 | -2.4461159 |
| C  | 0.1500013  | 0.9835083  | 2.4657110  |
| C  | 0.7287165  | 0.0071370  | 3.2815267  |
| C  | 1.6233128  | 0.4503791  | 4.3235092  |
| C  | 2.4095781  | -0.4501438 | 5.1031538  |
| C  | 1.7547700  | 1.8664969  | 4.5730569  |
| C  | 2.6116060  | 2.3116213  | 5.6245164  |
| C  | 1.0516312  | 2.7977929  | 3.7548362  |
| H  | 1.1364076  | 3.8710165  | 3.9818865  |
| C  | 0.2863444  | 2.3896196  | 2.6685845  |
| C  | 0.3770369  | -3.3973433 | 1.5151911  |
| C  | -0.0077838 | -4.2102690 | 2.5747488  |
| H  | -0.1403059 | -5.2894894 | 2.4028403  |
| C  | -0.2778298 | -3.6823808 | 3.8696977  |
| C  | -0.7563205 | -4.5212059 | 4.9211107  |
| C  | -0.0981385 | -2.2713741 | 4.1178761  |
| C  | -0.4710379 | -1.7598493 | 5.3977099  |
| C  | 0.4131453  | -1.4336022 | 3.0581128  |
| C  | 0.5761354  | -2.0098207 | 1.7931356  |
| O  | -0.6640837 | 0.5792141  | 1.4110716  |
| O  | 1.0266473  | -1.2212036 | 0.7374301  |
| P  | 0.0767737  | -0.0565832 | 0.0952884  |
| O  | 1.0387680  | 0.9712242  | -0.5228047 |
| O  | -1.0705654 | -0.6038191 | -0.7549726 |
| C  | 3.3424325  | 1.4074244  | 6.3806655  |
| C  | 3.2496823  | 0.0169096  | 6.1048230  |
| H  | 2.6939424  | 3.3938189  | 5.8120653  |
| H  | 4.0060808  | 1.7649041  | 7.1826660  |
| H  | 2.3535969  | -1.5277324 | 4.8949304  |
| H  | 3.8531471  | -0.6969659 | 6.6860392  |
| C  | -0.9513280 | -2.5996481 | 6.3935096  |

|   |            |            |            |
|---|------------|------------|------------|
| C | -1.0816486 | -3.9951731 | 6.1623029  |
| H | -0.3863422 | -0.6814427 | 5.5898464  |
| H | -1.2388837 | -2.1778017 | 7.3687031  |
| H | -1.4555114 | -4.6522222 | 6.9622862  |
| H | -0.8769789 | -5.5972922 | 4.7197190  |
| C | 0.3542848  | 4.1426982  | 0.8351884  |
| C | -0.4020581 | 3.3644409  | 1.7605647  |
| C | -0.3180790 | 5.0967643  | 0.0511936  |
| C | -1.8139942 | 3.5149427  | 1.8212415  |
| C | -2.4346823 | 4.4933758  | 1.0180021  |
| C | -1.7065035 | 5.3086930  | 0.1373613  |
| H | 0.2601549  | 5.7005447  | -0.6662058 |
| C | -2.6927927 | 2.6511174  | 2.7244407  |
| H | -3.5264496 | 4.6113084  | 1.0873458  |
| C | -3.6920012 | 1.8152151  | 1.9012558  |
| H | -4.4111310 | 2.4606905  | 1.3545587  |
| H | -4.2826845 | 1.1495063  | 2.5638891  |
| H | -3.1700297 | 1.1783034  | 1.1597768  |
| C | -3.4047417 | 3.4950989  | 3.7974425  |
| H | -2.0346942 | 1.9394594  | 3.2624449  |
| H | -4.1047625 | 4.2270326  | 3.3427640  |
| H | -2.6755559 | 4.0631895  | 4.4102582  |
| H | -3.9948160 | 2.8467450  | 4.4775704  |
| C | -2.3478418 | 6.4191967  | -0.6885090 |
| C | -3.8432310 | 6.2191192  | -0.9642100 |
| H | -4.2184320 | 7.0052392  | -1.6501260 |
| H | -4.4451144 | 6.2853994  | -0.0338754 |
| H | -4.0470418 | 5.2345567  | -1.4301073 |
| C | -2.0946351 | 7.7869988  | -0.0215785 |
| H | -1.8217547 | 6.4250314  | -1.6699507 |
| H | -2.4936349 | 8.6142333  | -0.6447153 |
| H | -1.0123388 | 7.9663235  | 0.1376070  |
| H | -2.5919343 | 7.8332155  | 0.9700083  |
| C | 1.8613944  | 3.9564437  | 0.6554461  |
| C | 2.3006913  | 4.0436424  | -0.8169640 |
| H | 3.3297029  | 3.6485113  | -0.9354655 |
| H | 2.3053860  | 5.0889808  | -1.1905038 |
| H | 1.6319030  | 3.4654333  | -1.4856497 |
| C | 2.6667063  | 4.9672577  | 1.4950582  |
| H | 2.1099399  | 2.9349168  | 1.0109962  |
| H | 3.7559998  | 4.8153700  | 1.3478731  |
| H | 2.4552527  | 4.8743914  | 2.5774607  |
| H | 2.4229767  | 6.0075490  | 1.1926663  |
| H | 0.1341046  | -5.7573980 | -4.2946172 |
| H | 4.3232360  | -5.3720256 | -0.2505152 |
| H | -3.4832124 | -5.7223250 | 0.6607127  |
| C | 1.1243989  | -5.3844178 | -3.9517110 |
| H | 4.8404763  | -2.2868326 | 0.3515031  |
| H | 1.7054463  | -4.6473871 | -5.9391005 |
| H | -3.9780636 | -3.5249688 | -0.5328389 |
| C | 0.9332466  | -4.8676235 | -2.5297393 |
| C | 3.9419204  | -4.9072544 | 0.6829570  |
| C | 1.5494061  | -4.2575366 | -4.9116052 |
| H | 2.4967021  | -3.7820101 | -4.5822610 |
| C | 2.0282925  | -4.4608075 | -1.7470681 |
| C | -2.4715843 | -5.7370968 | 0.2046525  |
| H | 1.7997270  | -7.3812470 | -3.3259905 |
| C | -0.3469422 | -4.7893400 | -1.9563245 |
| C | 2.1091448  | -6.5653829 | -4.0099374 |
| H | 2.1672422  | -6.9795176 | -5.0377890 |
| H | -1.2136643 | -5.1150764 | -2.5551036 |
| C | 3.9737259  | -2.5520913 | -0.2879958 |
| H | 4.8178830  | -4.6639564 | 1.3195196  |
| C | 3.3318207  | -5.6679122 | 1.2118549  |
| H | 1.8747101  | -3.9916130 | -0.4315109 |
| C | -2.9678158 | -3.5526533 | -0.9896183 |
| C | -0.5590520 | -4.3222925 | -0.6434269 |
| H | -1.7901614 | -6.2713262 | 0.8976890  |
| H | -2.5301435 | -6.3346323 | -0.7293785 |
| C | 3.1195257  | -3.6397448 | 0.3805243  |
| C | 0.5676411  | -3.9185163 | 0.1249045  |

|   |            |            |            |
|---|------------|------------|------------|
| C | -1.9816477 | -4.3050740 | -0.0844592 |
| H | 3.3885132  | -1.6314303 | -0.4624459 |
| H | -2.6495097 | -2.5048444 | -1.1366904 |
| H | 4.3737045  | -2.8810287 | -1.2694872 |
| H | 0.7729472  | -3.4680232 | -4.9649048 |
| H | -3.0733962 | -4.0261980 | -1.9878789 |
| H | 3.1341328  | -6.2537702 | -3.7197143 |
| H | 2.7836862  | -3.2370576 | 1.3578788  |
| H | -1.9561599 | -3.7603386 | 0.8809068  |
| H | 3.0434659  | -4.5138408 | -2.1714245 |
| H | -1.9727138 | -1.2956181 | -4.6316720 |
| H | -1.0863568 | -2.1327595 | -3.2016777 |
| H | -0.2121085 | 0.2887683  | -6.2667566 |
| H | 0.9138192  | 2.3187570  | -5.4149408 |

### TS1-8-j

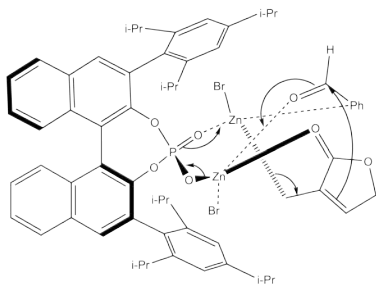

Energy(Hartree)= -11970.0029649  
number of imaginary frequencies: 1

|    |            |            |            |
|----|------------|------------|------------|
| Zn | 2.3861418  | 0.8995115  | -1.9599505 |
| Br | 4.6628603  | 0.9871767  | -1.6801145 |
| C  | -2.3841304 | 2.5837875  | -2.1700591 |
| C  | -1.0983933 | 2.1850805  | -2.5942003 |
| C  | -0.7779058 | 2.1503973  | -3.9773966 |
| C  | -1.7771347 | 2.4800853  | -4.9162461 |
| C  | -3.0580957 | 2.8591554  | -4.4902892 |
| C  | -3.3652190 | 2.9132212  | -3.1206924 |
| H  | -2.6015499 | 2.6498081  | -1.0930757 |
| H  | -0.2970671 | 2.0198461  | -1.8585059 |
| C  | 0.6201604  | 1.8644097  | -4.4099577 |
| H  | -1.5402184 | 2.4624014  | -5.9926000 |
| H  | -3.8282134 | 3.1134489  | -5.2338956 |
| H  | -4.3749307 | 3.1960465  | -2.7913455 |
| O  | 1.5827250  | 1.7894087  | -3.5588074 |
| C  | 0.4323258  | 0.0431026  | -5.4435556 |
| C  | 0.0792305  | -0.8296513 | -4.3836286 |
| C  | 1.3765707  | -1.0447084 | -3.6699844 |
| O  | 2.4002442  | -0.8071516 | -4.5179782 |
| C  | 1.8957128  | -0.2127117 | -5.7332283 |
| O  | 1.5698305  | -1.2559177 | -2.4768429 |
| C  | -1.1441189 | -1.3183645 | -3.9134358 |
| H  | 2.0475689  | -0.9273781 | -6.5717203 |
| H  | 2.5067768  | 0.6945164  | -5.9183592 |
| Zn | -2.0625502 | -0.1105525 | -2.3672117 |
| Br | -4.3811284 | -0.3497325 | -2.4724302 |
| C  | 0.1452865  | 0.9841058  | 2.4639589  |
| C  | 0.7164327  | 0.0056284  | 3.2827921  |
| C  | 1.6099038  | 0.4449111  | 4.3274100  |
| C  | 2.3883638  | -0.4590517 | 5.1104874  |
| C  | 1.7491053  | 1.8601689  | 4.5760358  |
| C  | 2.6048798  | 2.3007224  | 5.6296012  |
| C  | 1.0547499  | 2.7938494  | 3.7538363  |
| H  | 1.1441149  | 3.8671715  | 3.9785142  |
| C  | 0.2912536  | 2.3895689  | 2.6652044  |
| C  | 0.3754017  | -3.3979880 | 1.5144426  |
| C  | -0.0151319 | -4.2105645 | 2.5719634  |

|   |            |            |            |
|---|------------|------------|------------|
| H | -0.1448575 | -5.2897984 | 2.3981287  |
| C | -0.2940932 | -3.6834601 | 3.8650010  |
| C | -0.7771819 | -4.5219893 | 4.9138668  |
| C | -0.1161989 | -2.2727006 | 4.1145070  |
| C | -0.4923177 | -1.7624224 | 5.3935906  |
| C | 0.3987102  | -1.4342682 | 3.0573488  |
| C | 0.5689807  | -2.0097976 | 1.7931294  |
| O | -0.6665934 | 0.5841466  | 1.4062938  |
| O | 1.0230946  | -1.2204023 | 0.7404108  |
| P | 0.0740872  | -0.0582410 | 0.0931171  |
| O | 1.0359613  | 0.9650227  | -0.5311946 |
| O | -1.0728863 | -0.6150936 | -0.7516360 |
| C | 3.3276948  | 1.3936251  | 6.3889029  |
| C | 3.2274987  | 0.0040329  | 6.1141574  |
| H | 2.6937299  | 3.3826935  | 5.8154233  |
| H | 3.9911997  | 1.7482297  | 7.1922133  |
| H | 2.3264535  | -1.5361375 | 4.9021692  |
| H | 3.8249957  | -0.7129135 | 6.6976355  |
| C | -0.9761875 | -2.6026078 | 6.3866960  |
| C | -1.1071402 | -3.9971773 | 6.1537480  |
| H | -0.4062833 | -0.6842435 | 5.5859746  |
| H | -1.2658607 | -2.1814988 | 7.3615235  |
| H | -1.4841942 | -4.6548416 | 6.9516493  |
| H | -0.8971480 | -5.5978746 | 4.7111140  |
| C | 0.3772019  | 4.1393534  | 0.8303700  |
| C | -0.3874697 | 3.3680674  | 1.7543926  |
| C | -0.2873482 | 5.0944016  | 0.0412497  |
| C | -1.7986927 | 3.5257165  | 1.8088145  |
| C | -2.4106633 | 4.5052920  | 1.0008097  |
| C | -1.6745392 | 5.3141145  | 0.1212528  |
| H | 0.2971616  | 5.6923320  | -0.6759389 |
| C | -2.6848400 | 2.6717730  | 2.7143003  |
| H | -3.5018813 | 4.6303346  | 1.0667130  |
| C | -3.6906308 | 1.8398873  | 1.8955976  |
| H | -4.4046456 | 2.4871935  | 1.3443439  |
| H | -4.2880285 | 1.1831883  | 2.5609332  |
| H | -3.1743824 | 1.1921087  | 1.1597552  |
| C | -3.3886129 | 3.5261069  | 3.7843750  |
| H | -2.0322835 | 1.9570027  | 3.2548270  |
| H | -4.0821700 | 4.2629732  | 3.3279296  |
| H | -2.6543024 | 4.0905034  | 4.3941459  |
| H | -3.9844313 | 2.8864278  | 4.4676267  |
| C | -2.3055592 | 6.4288961  | -0.7068365 |
| C | -3.7978729 | 6.2319795  | -1.0006003 |
| H | -4.1662139 | 7.0235997  | -1.6839102 |
| H | -4.4101287 | 6.2915646  | -0.0766803 |
| H | -3.9959874 | 5.2513586  | -1.4769067 |
| C | -2.0577328 | 7.7931215  | -0.0310323 |
| H | -1.7692924 | 6.4382146  | -1.6828522 |
| H | -2.4478402 | 8.6249218  | -0.6537270 |
| H | -0.9772583 | 7.9689816  | 0.1423711  |
| H | -2.5651759 | 7.8351876  | 0.9553781  |
| C | 1.8831027  | 3.9402597  | 0.6536158  |
| C | 2.3287231  | 4.0342995  | -0.8163250 |
| H | 3.3494652  | 3.6189565  | -0.9374291 |
| H | 2.3568949  | 5.0833826  | -1.1785907 |
| H | 1.6498796  | 3.4783070  | -1.4937507 |
| C | 2.6972596  | 4.9353092  | 1.5033243  |
| H | 2.1203965  | 2.9136977  | 1.0022865  |
| H | 3.7848057  | 4.7731431  | 1.3556326  |
| H | 2.4848054  | 4.8351381  | 2.5846181  |
| H | 2.4646186  | 5.9807893  | 1.2104151  |
| H | 0.1660286  | -5.7618976 | -4.2939966 |
| H | 4.3357073  | -5.3446590 | -0.2396983 |
| H | -3.4646909 | -5.7617607 | 0.6442150  |
| C | 1.1517261  | -5.3772946 | -3.9501202 |
| H | 4.8341448  | -2.2506408 | 0.3612939  |
| H | 1.7331041  | -4.6358570 | -5.9364068 |
| H | -3.9744106 | -3.5610789 | -0.5417084 |
| C | 0.9528349  | -4.8620429 | -2.5286608 |
| C | 3.9501815  | -4.8797595 | 0.6918424  |



|   |            |            |            |
|---|------------|------------|------------|
| C | 1.5648855  | -4.2464029 | -4.9105533 |
| H | 2.5024439  | -3.7550277 | -4.5769051 |
| C | 2.0420333  | -4.4437337 | -1.7446182 |
| C | -2.4517480 | -5.7658605 | 0.1911098  |
| H | 1.8479433  | -7.3653100 | -3.3214325 |
| C | -0.3286343 | -4.7974287 | -1.9573266 |
| C | 2.1489753  | -6.5475969 | -4.0064864 |
| H | 2.2136464  | -6.9627801 | -5.0335099 |
| H | -1.1911338 | -5.1328673 | -2.5569031 |
| C | 3.9732694  | -2.5253623 | -0.2816256 |
| H | 4.8239878  | -4.6313820 | 1.3292297  |
| H | 3.3429112  | -5.6428129 | 1.2202193  |
| C | 1.8821564  | -3.9775763 | -0.4290400 |
| C | -2.9623032 | -3.5802311 | -0.9941369 |
| C | -0.5480412 | -4.3323941 | -0.6452128 |
| H | -1.7678812 | -6.2983504 | 0.8829406  |
| H | -2.5027001 | -6.3605020 | -0.7450444 |
| C | 3.1227583  | -3.6165423 | 0.3853337  |
| C | 0.5735175  | -3.9185447 | 0.1252313  |
| C | -1.9723840 | -4.3288746 | -0.0901830 |
| H | 3.3846024  | -1.6082960 | -0.4620849 |
| H | -2.6530643 | -2.5289289 | -1.1347469 |
| H | 4.3827435  | -2.8523002 | -1.2596948 |
| H | 0.7766497  | -3.4689943 | -4.9692779 |
| H | -3.0622091 | -4.0481094 | -1.9955802 |
| H | 3.1701036  | -6.2252861 | -3.7149000 |
| H | 2.7818793  | -3.2148392 | 1.3613484  |
| H | -1.9541578 | -3.7882445 | 0.8775545  |
| H | 3.0584361  | -4.4846136 | -2.1671718 |
| H | -1.9977771 | -1.3303349 | -4.6107858 |
| H | -1.0833689 | -2.1575569 | -3.1938799 |
| H | -0.2629658 | 0.2833791  | -6.2618746 |
| H | 0.8671074  | 2.3438243  | -5.3909277 |

|    |            |            |            |
|----|------------|------------|------------|
| C  | 0.1674038  | 2.6618247  | -4.0352757 |
| C  | 1.3964185  | 2.0819571  | -3.4566844 |
| O  | 2.4140473  | 2.9613032  | -3.4808913 |
| C  | 1.9366320  | 4.1968782  | -4.0602570 |
| O  | 1.5251341  | 0.9416898  | -2.9828218 |
| C  | -1.0866953 | 1.9040994  | -4.0262865 |
| H  | 2.5783410  | 4.4310230  | -4.9379297 |
| H  | 2.0853717  | 5.0010069  | -3.3044431 |
| Zn | -1.7375449 | 1.8519037  | -2.1213873 |
| Br | -2.9554679 | 3.4032477  | -0.8340302 |
| H  | -0.9207711 | 0.8379293  | -4.2751844 |
| H  | -1.8613525 | 2.3451035  | -4.6810266 |
| H  | -0.1531164 | 4.6962814  | -4.8393139 |
| C  | -0.2192030 | -1.1624294 | 2.4074954  |
| C  | -0.7532218 | -2.4573146 | 2.3947144  |
| C  | -0.2832479 | -3.3873616 | 3.3970788  |
| C  | -0.5924366 | -4.7810959 | 3.3700544  |
| C  | 0.5672507  | -2.9018271 | 4.4573876  |
| C  | 1.0030679  | -3.8040028 | 5.4744269  |
| C  | 0.9916416  | -1.5426763 | 4.4533056  |
| H  | 1.6283537  | -1.1854956 | 5.2764540  |
| C  | 0.6638240  | -0.6723375 | 3.4206198  |
| C  | -2.3143880 | -3.1493518 | -1.0573546 |
| C  | -3.4339254 | -3.8916416 | -0.6989363 |
| H  | -4.0636862 | -4.3351469 | -1.4859680 |
| C  | -3.8214706 | -4.0540316 | 0.6628460  |
| C  | -5.0332697 | -4.7255896 | 1.0076426  |
| C  | -3.0000590 | -3.4972026 | 1.7120029  |
| C  | -3.4754475 | -3.5805227 | 3.0553369  |
| C  | -1.7493501 | -2.8643969 | 1.3617563  |
| C  | -1.4868839 | -2.6567068 | 0.0026605  |
| O  | -0.6043919 | -0.2570657 | 1.4265130  |
| O  | -0.3134422 | -2.0307672 | -0.3747607 |
| P  | -0.0263665 | -0.4361213 | -0.1004164 |
| O  | 1.5032585  | -0.3493195 | -0.1436616 |
| O  | -0.8661750 | 0.4911410  | -0.9611494 |
| C  | 0.6555695  | -5.1458991 | 5.4351400  |
| C  | -0.1337374 | -5.6379880 | 4.3615975  |
| H  | 1.6399879  | -3.4134685 | 6.2837433  |
| H  | 1.0049069  | -5.8328786 | 6.2209617  |
| H  | -1.1926312 | -5.1816562 | 2.5418308  |
| H  | -0.3799132 | -6.7096611 | 4.3102981  |
| C  | -4.6709868 | -4.2196220 | 3.3554260  |
| C  | -5.4504866 | -4.8140772 | 2.3274269  |
| H  | -2.8864919 | -3.1195462 | 3.8604585  |
| H  | -5.0189546 | -4.2609630 | 4.3989078  |
| H  | -6.3913593 | -5.3273467 | 2.5781222  |
| H  | -5.6423822 | -5.1573258 | 0.1978265  |
| C  | 2.5995487  | 0.9302162  | 3.1064920  |
| C  | 1.2095170  | 0.7208948  | 3.3489332  |
| C  | 3.0850893  | 2.2490895  | 3.0670115  |
| C  | 0.3462139  | 1.8366798  | 3.5192401  |
| C  | 0.8868002  | 3.1363888  | 3.4660239  |
| C  | 2.2540658  | 3.3698884  | 3.2523229  |
| H  | 4.1600053  | 2.4139660  | 2.8851493  |
| C  | -1.1448605 | 1.6799579  | 3.8105447  |
| H  | 0.2071068  | 3.9894120  | 3.6066563  |
| C  | -2.0159753 | 2.3875987  | 2.7594013  |
| H  | -1.8574736 | 3.4862330  | 2.7630047  |
| H  | -3.0927069 | 2.2104005  | 2.9608814  |
| H  | -1.7995392 | 2.0218215  | 1.7379862  |
| C  | -1.4766384 | 2.1519544  | 5.2392090  |
| H  | -1.3889283 | 0.5994835  | 3.7675979  |
| H  | -1.2743643 | 3.2364779  | 5.3649921  |
| H  | -0.8735072 | 1.6077156  | 5.9945204  |
| H  | -2.5493836 | 1.9827116  | 5.4677910  |
| C  | 2.8678636  | 4.7673815  | 3.2690111  |
| C  | 1.8580576  | 5.8994676  | 3.0491571  |
| H  | 2.3816420  | 6.8710942  | 2.9443314  |
| H  | 1.1608946  | 5.9939298  | 3.9077951  |
| H  | 1.2514840  | 5.7391089  | 2.1362359  |

## 7.2.2 Pathways starting from 14j-mi

### 7.2.2.1 to 15d-mi

#### TS1-8-d; COSMO

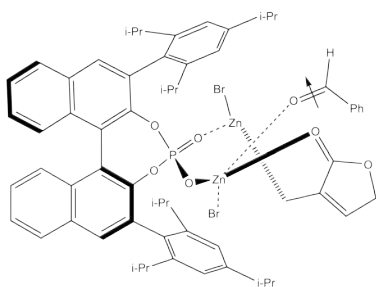

Energy(Hartree) = -11970.03985384

|    |            |            |            |
|----|------------|------------|------------|
| Zn | 2.7573362  | 0.2578041  | -1.5121400 |
| Br | 4.6941242  | -0.8029248 | -2.1814407 |
| C  | 0.1935162  | 5.4582050  | -0.6248182 |
| C  | 0.9908539  | 4.3151769  | -0.5290339 |
| C  | 2.3988629  | 4.4443572  | -0.4417406 |
| C  | 2.9965166  | 5.7259572  | -0.4299310 |
| C  | 2.1933406  | 6.8689674  | -0.5336591 |
| C  | 0.7964540  | 6.7326407  | -0.6345893 |
| H  | -0.9000339 | 5.3446639  | -0.6926267 |
| H  | 0.5409372  | 3.3101168  | -0.5144967 |
| C  | 3.2448262  | 3.2519254  | -0.4307960 |
| H  | 4.0919546  | 5.8153920  | -0.3529236 |
| H  | 2.6524364  | 7.8688142  | -0.5323578 |
| H  | 0.1654905  | 7.6314830  | -0.7130087 |
| O  | 2.7917713  | 2.1173045  | -0.6107594 |
| C  | 0.5055688  | 3.9396046  | -4.3927203 |

|   |            |            |            |
|---|------------|------------|------------|
| C | 3.6603625  | 4.9883717  | 4.5736913  |
| H | 3.5995363  | 4.8018154  | 2.4292533  |
| H | 4.1670497  | 5.9759622  | 4.5696610  |
| H | 4.4322158  | 4.2064010  | 4.7204427  |
| H | 2.9795573  | 4.9559184  | 5.4500851  |
| C | 3.5806033  | -0.2270863 | 2.9142457  |
| C | 4.5231636  | -0.0271560 | 1.7180861  |
| H | 5.1332408  | -0.9361847 | 1.5444842  |
| H | 5.2274463  | 0.8170229  | 1.8721708  |
| H | 3.9579816  | 0.1712190  | 0.7907640  |
| C | 4.3975503  | -0.4768786 | 4.1974599  |
| H | 2.9831564  | -1.1376225 | 2.7050523  |
| H | 5.0724142  | -1.3487261 | 4.0710221  |
| H | 3.7484047  | -0.6715899 | 5.0739355  |
| H | 5.0253055  | 0.4063782  | 4.4404993  |
| H | -1.3561533 | -0.3877630 | -6.5767516 |
| H | 0.4609750  | -5.5163300 | -4.1193890 |
| H | -6.2769911 | -1.2696518 | -3.2265992 |
| C | -0.7227841 | -1.2804357 | -6.3751988 |
| H | 2.2390644  | -4.5029045 | -1.6758284 |
| H | 0.9878287  | -0.2940568 | -7.3247679 |
| H | -5.0126826 | 0.3637924  | -1.6905051 |
| C | -1.1608286 | -1.8288043 | -5.0226524 |
| C | 0.0884985  | -5.5944612 | -3.0763178 |
| C | 0.7453164  | -0.8209476 | -6.3792966 |
| H | 1.4425226  | -1.6801584 | -6.2946567 |
| C | -0.3602946 | -2.7288836 | -4.2999556 |
| C | -5.3065758 | -1.5299853 | -3.6966879 |
| H | -2.0604949 | -2.5949593 | -7.5277438 |
| C | -2.3988312 | -1.4653227 | -4.4667972 |
| C | -0.9914499 | -2.3027155 | -7.4961088 |
| H | -0.7163519 | -1.8882230 | -8.4884347 |
| H | -3.0425488 | -0.7708033 | -5.0308608 |
| C | 1.6319774  | -3.7573137 | -2.2290989 |
| H | 0.7020014  | -6.3582502 | -2.5548330 |
| H | -0.9569027 | -5.9625598 | -3.1196238 |
| C | -0.7344519 | -3.2179513 | -3.0371462 |
| C | -4.0508341 | -0.0017411 | -2.1043185 |
| C | -2.8297284 | -1.9285958 | -3.2084823 |
| H | -5.3874726 | -2.5563596 | -4.1086013 |
| H | -5.1606784 | -0.8351346 | -4.5496517 |
| C | 0.1749619  | -4.2367659 | -2.3508381 |
| C | -1.9687961 | -2.7908848 | -2.4676445 |
| C | -4.1709170 | -1.4283267 | -2.6653138 |
| H | 1.6973396  | -2.7980938 | -1.6813424 |
| H | -3.3069661 | 0.0381798  | -1.2828728 |
| H | 2.1112432  | -3.6167423 | -3.2198992 |
| H | 0.9600441  | -0.1397913 | -5.5317795 |
| H | -3.7621401 | 0.7122974  | -2.9098028 |
| H | -0.3950430 | -3.2255328 | -7.3359325 |
| H | -0.2069165 | -4.3988916 | -1.3226889 |
| H | -4.4533612 | -2.0718464 | -1.8107290 |
| H | 0.5997953  | -3.0564401 | -4.7274060 |
| H | 4.3454716  | 3.4045609  | -0.2784511 |

|    |            |            |            |
|----|------------|------------|------------|
| C  | 0.1885055  | 5.4428636  | -0.6044813 |
| C  | 0.9861714  | 4.2995589  | -0.5079991 |
| C  | 2.3933668  | 4.4274637  | -0.4177236 |
| C  | 2.9908874  | 5.7084704  | -0.4036269 |
| C  | 2.1888827  | 6.8520148  | -0.5086923 |
| C  | 0.7921534  | 6.7163061  | -0.6123710 |
| H  | -0.9048583 | 5.3246175  | -0.6752190 |
| H  | 0.5342856  | 3.2953796  | -0.4952134 |
| C  | 3.2380871  | 3.2314900  | -0.4066696 |
| H  | 4.0863179  | 5.7972756  | -0.3227719 |
| H  | 2.6485091  | 7.8517122  | -0.5048129 |
| H  | 0.1619151  | 7.6157771  | -0.6905578 |
| O  | 2.7887602  | 2.1009189  | -0.6017697 |
| C  | 0.4899854  | 3.9452331  | -4.3720543 |
| C  | 0.1628932  | 2.6609505  | -4.0269368 |
| C  | 1.3962043  | 2.0880068  | -3.4453506 |
| O  | 2.4044662  | 2.9820226  | -3.4554101 |
| C  | 1.9163517  | 4.2153939  | -4.0254042 |
| O  | 1.5349400  | 0.9474855  | -2.9820598 |
| C  | -1.0802193 | 1.8906151  | -4.0261309 |
| H  | 2.5633337  | 4.4657162  | -4.8956337 |
| H  | 2.0495325  | 5.0135254  | -3.2596679 |
| Zn | -1.7396592 | 1.8572309  | -2.1189397 |
| Br | -2.9380151 | 3.4210850  | -0.8492508 |
| H  | -0.9022001 | 0.8231244  | -4.2589271 |
| H  | -1.8561934 | 2.3182139  | -4.6878567 |
| H  | -0.1762371 | 4.6972851  | -4.8147892 |
| C  | -0.2202299 | -1.1568934 | 2.3963769  |
| C  | -0.7548114 | -2.4518501 | 2.3916292  |
| C  | -0.2871098 | -3.3756184 | 3.4007024  |
| C  | -0.5976041 | -4.7689657 | 3.3826070  |
| C  | 0.5618253  | -2.8843055 | 4.4591936  |
| C  | 0.9941499  | -3.7800971 | 5.4826295  |
| C  | 0.9876150  | -1.5261549 | 4.4458521  |
| H  | 1.6240072  | -1.1628876 | 5.2665502  |
| C  | 0.6627002  | -0.6621407 | 3.4072408  |
| C  | -2.3091085 | -3.1582355 | -1.0599703 |
| C  | -3.4291907 | -3.8990725 | -0.7011973 |
| H  | -4.0585796 | -4.3412278 | -1.4893903 |
| C  | -3.8185139 | -4.0589643 | 0.6601104  |
| C  | -5.0298585 | -4.7299365 | 1.0055749  |
| C  | -2.9993922 | -3.4981066 | 1.7087560  |
| C  | -3.4773664 | -3.5771023 | 3.0511417  |
| C  | -1.7482596 | -2.8660696 | 1.3589936  |
| C  | -1.4822173 | -2.6646070 | -0.0002105 |
| O  | -0.6039337 | -0.2565149 | 1.4106093  |
| O  | -0.3079683 | -2.0416106 | -0.3776870 |
| P  | -0.0263684 | -0.4440698 | -0.1158978 |
| O  | 1.5017238  | -0.3492140 | -0.1601981 |
| O  | -0.8715310 | 0.4703981  | -0.9856820 |
| C  | 0.6449600  | -5.1211776 | 5.4522569  |
| C  | -0.1425814 | -5.6191511 | 4.3809343  |
| H  | 1.6305377  | -3.3847462 | 6.2900038  |
| H  | 0.9919122  | -5.8030599 | 6.2434728  |
| H  | -1.1966818 | -5.1735323 | 2.5556923  |
| H  | -0.3903584 | -6.6906909 | 4.3363508  |
| C  | -4.6722449 | -4.2164501 | 3.3511690  |
| C  | -5.4491982 | -4.8147655 | 2.3243342  |
| H  | -2.8892977 | -3.1129113 | 3.8548854  |
| H  | -5.0216709 | -4.2547010 | 4.3942085  |
| H  | -6.3899898 | -5.3281338 | 2.5748610  |
| H  | -5.6373376 | -5.1646578 | 0.1961245  |
| C  | 2.6035395  | 0.9342341  | 3.0949687  |
| C  | 1.2119291  | 0.7294136  | 3.3311449  |
| C  | 3.0934520  | 2.2515688  | 3.0618921  |
| C  | 0.3512352  | 1.8474680  | 3.4987268  |
| C  | 0.8964922  | 3.1452490  | 3.4512466  |
| C  | 2.2657129  | 3.3744652  | 3.2477089  |
| H  | 4.1705888  | 2.4122733  | 2.8885697  |
| C  | -1.1412802 | 1.6953679  | 3.7843444  |
| H  | 0.2184947  | 3.9996073  | 3.5913092  |

### TS1-8-d

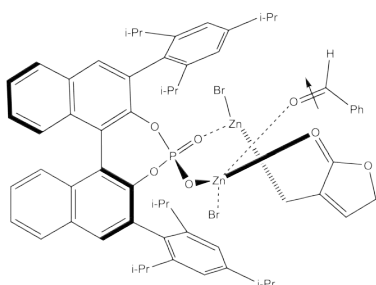

Energy(Hartree) = -11970.02600673  
 number of imaginary frequencies: 1

|    |           |            |            |
|----|-----------|------------|------------|
| Zn | 2.7755863 | 0.2254524  | -1.5221557 |
| Br | 4.7196507 | -0.7925964 | -2.1919626 |

|   |            |            |            |
|---|------------|------------|------------|
| C | -2.0067989 | 2.4060144  | 2.7309770  |
| H | -1.8454794 | 3.5042141  | 2.7334064  |
| H | -3.0847461 | 2.2333373  | 2.9281339  |
| H | -1.7910341 | 2.0386546  | 1.7101337  |
| C | -1.4754877 | 2.1667804  | 5.2125346  |
| H | -1.3882939 | 0.6157139  | 3.7398733  |
| H | -1.2706833 | 3.2504378  | 5.3407563  |
| H | -0.8760526 | 1.6205528  | 5.9690993  |
| H | -2.5493222 | 2.0008940  | 5.4378361  |
| C | 2.8850819  | 4.7693409  | 3.2808576  |
| C | 1.8806780  | 5.9078726  | 3.0697068  |
| H | 2.4075083  | 6.8789767  | 2.9763375  |
| H | 1.1828367  | 5.9965659  | 3.9282167  |
| H | 1.2736935  | 5.7595219  | 2.1552105  |
| C | 3.6732602  | 4.9738301  | 4.5906589  |
| H | 3.6201857  | 4.8105160  | 2.4438521  |
| H | 4.1843434  | 5.9591356  | 4.6002957  |
| H | 4.4401852  | 4.1865954  | 4.7335279  |
| H | 2.9886277  | 4.9341040  | 5.4634239  |
| C | 3.5820331  | -0.2258714 | 2.9057277  |
| C | 4.5256421  | -0.0321119 | 1.7096646  |
| H | 5.1381846  | -0.9401350 | 1.5411329  |
| H | 5.2289861  | 0.8139925  | 1.8584076  |
| H | 3.9626097  | 0.1570102  | 0.7794005  |
| C | 4.3976068  | -0.4739891 | 4.1900191  |
| H | 2.9826076  | -1.1354020 | 2.6982592  |
| H | 5.0695513  | -1.3484265 | 4.0670911  |
| H | 3.7479949  | -0.6631575 | 5.0672339  |
| H | 5.0283869  | 0.4074904  | 4.4313308  |
| H | -1.3646593 | -0.3843845 | -6.5762203 |
| H | 0.4623563  | -5.5143656 | -4.1341507 |
| H | -6.2824875 | -1.3221301 | -3.2060735 |
| C | -0.7310624 | -1.2777187 | -6.3773944 |
| H | 2.2462136  | -4.5063919 | -1.6913389 |
| H | 0.9764675  | -0.2938968 | -7.3359401 |
| H | -5.0321091 | 0.3825734  | -1.7433456 |
| C | -1.1640496 | -1.8260373 | -5.0231710 |
| C | 0.0924991  | -5.5953002 | -3.0904825 |
| C | 0.7368750  | -0.8182051 | -6.3883182 |
| H | 1.4351706  | -1.6764306 | -6.3044317 |
| C | -0.3614566 | -2.7272576 | -4.3045020 |
| C | -5.3125204 | -1.5912612 | -3.6722730 |
| H | -2.0740032 | -2.5929238 | -7.5226793 |
| C | -2.3992345 | -1.4626942 | -4.4620610 |
| C | -1.0051495 | -2.3001454 | -7.4966588 |
| H | -0.7344717 | -1.8873316 | -8.4908667 |
| H | -3.0445411 | -0.7660820 | -5.0221288 |
| C | 1.6367508  | -3.7596745 | -2.2400019 |
| H | 0.7076140  | -6.3605503 | -2.5732537 |
| H | -0.9526280 | -5.9637151 | -3.1333811 |
| C | -0.7320122 | -3.2203184 | -3.0425607 |
| C | -4.0669915 | 0.0159561  | -2.1482787 |
| C | -2.8266649 | -1.9292186 | -3.2040197 |
| H | -5.3838861 | -2.6353601 | -4.0386651 |
| H | -5.1827641 | -0.9345117 | -4.5574096 |
| C | 0.1800017  | -4.2399102 | -2.3610352 |
| C | -1.9654633 | -2.7958988 | -2.4694797 |
| C | -4.1676085 | -1.4309851 | -2.6584798 |
| H | 1.7036567  | -2.8039861 | -1.6865824 |
| H | -3.3252486 | 0.0907777  | -1.3270667 |
| H | 2.1159087  | -3.6137278 | -3.2299783 |
| H | 0.9557502  | -0.1350260 | -5.5436891 |
| H | -3.7869490 | 0.7088491  | -2.9741512 |
| H | -0.4091059 | -3.2233150 | -7.3384201 |
| H | -0.2002891 | -4.4052569 | -1.3327802 |
| H | -4.4277690 | -2.0489535 | -1.7783348 |
| H | 0.5979773  | -3.0530967 | -4.7345732 |
| H | 4.3382357  | 3.3833898  | -0.2390821 |

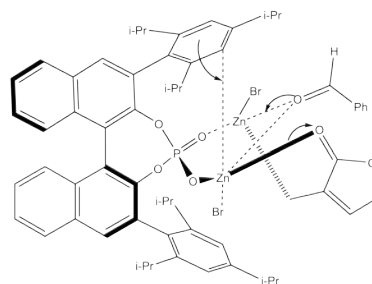

Energy(Hartree)= -11970.03421494

|    |            |            |            |
|----|------------|------------|------------|
| Zn | 2.3367171  | 0.3350188  | 1.5895910  |
| Br | 4.6791105  | 0.3025645  | 1.7168258  |
| C  | 1.7550944  | 6.7969876  | 1.7568540  |
| C  | 1.6793626  | 5.4057917  | 1.6358826  |
| C  | 2.8698241  | 4.6418650  | 1.5622856  |
| C  | 4.1303148  | 5.2940853  | 1.6399083  |
| C  | 4.1966696  | 6.6826513  | 1.7688026  |
| C  | 3.0068244  | 7.4363671  | 1.8205340  |
| H  | 0.8274941  | 7.3866065  | 1.8093224  |
| H  | 0.6955984  | 4.9111087  | 1.6103365  |
| C  | 2.8872503  | 3.2005408  | 1.4195908  |
| H  | 5.0531306  | 4.6940365  | 1.5930576  |
| H  | 5.1730286  | 7.1860379  | 1.8295632  |
| H  | 3.0583432  | 8.5317615  | 1.9190951  |
| O  | 1.8769293  | 2.4322772  | 1.3908910  |
| C  | 3.5513791  | 3.8416201  | -1.5313586 |
| C  | 2.4221780  | 3.0702130  | -1.5685790 |
| C  | 2.8961489  | 1.6503577  | -1.5056075 |
| O  | 4.2617591  | 1.6239565  | -1.5965557 |
| C  | 4.7621747  | 2.9659655  | -1.6089567 |
| O  | 2.2415242  | 0.6350855  | -1.3421707 |
| C  | 1.0029009  | 3.3920203  | -1.5867351 |
| H  | 5.3460007  | 3.1270300  | -2.5441443 |
| H  | 5.4703692  | 3.0809764  | -0.7568750 |
| Zn | -0.0484595 | 2.8569843  | 0.0623712  |
| Br | -1.6385543 | 3.9327776  | 1.4571578  |
| H  | 0.4671788  | 2.7310122  | -2.3024670 |
| H  | 0.8068848  | 4.4559196  | -1.8185409 |
| H  | 3.5996994  | 4.9392759  | -1.5287239 |
| C  | -1.6440374 | -2.2876310 | 1.5699131  |
| C  | -2.1854336 | -3.2011464 | 0.6624643  |
| C  | -2.2076575 | -4.5939298 | 1.0462058  |
| C  | -2.5857817 | -5.6405095 | 0.1526747  |
| C  | -1.7972449 | -4.9561027 | 2.3840475  |
| C  | -1.8650856 | -6.3235470 | 2.7878161  |
| C  | -1.2542736 | -3.9647942 | 3.2548226  |
| H  | -0.8925585 | -4.2740243 | 4.2476824  |
| C  | -1.1032833 | -2.6454788 | 2.8487362  |
| C  | -2.1680274 | -1.4318126 | -2.7568403 |
| C  | -3.3866916 | -1.8468857 | -3.2819149 |
| H  | -3.6646796 | -1.5386126 | -4.3014402 |
| C  | -4.3151514 | -2.6100288 | -2.5185018 |
| C  | -5.6016000 | -2.9410237 | -3.0420116 |
| C  | -3.9727070 | -3.0152823 | -1.1757670 |
| C  | -4.9737456 | -3.6693943 | -0.3951984 |
| C  | -2.6569176 | -2.7099605 | -0.6648974 |
| C  | -1.8253766 | -1.8944443 | -1.4484005 |
| O  | -1.6255497 | -0.9435453 | 1.2263330  |
| O  | -0.5644430 | -1.5382525 | -0.9823610 |
| P  | -0.4214472 | -0.4342437 | 0.2209201  |
| O  | 0.9508726  | -0.7415416 | 0.8447884  |
| O  | -0.7833793 | 0.9894344  | -0.1596703 |
| C  | -2.2767458 | -7.3104619 | 1.9043153  |
| C  | -2.6203777 | -6.9643607 | 0.5706292  |
| H  | -1.5621364 | -6.5829721 | 3.8145085  |
| H  | -2.3176637 | -8.3617911 | 2.2275554  |

TS2-8-d; COSMO

|   |            |            |            |
|---|------------|------------|------------|
| H | -2.8464043 | -5.3901790 | -0.8847396 |
| H | -2.9119855 | -7.7518551 | -0.1410150 |
| C | -6.2234243 | -3.9584295 | -0.9264565 |
| C | -6.5377207 | -3.6089531 | -2.2670857 |
| H | -4.7511864 | -3.9356563 | 0.6472543  |
| H | -6.9787749 | -4.4568383 | -0.2997748 |
| H | -7.5286360 | -3.8512669 | -2.6804667 |
| H | -5.8423196 | -2.6361744 | -4.0726434 |
| C | 1.1410725  | -1.7695108 | 3.5868653  |
| C | -0.2735050 | -1.6111318 | 3.5420908  |
| C | 1.9354628  | -0.6502904 | 3.9391918  |
| C | -0.8636860 | -0.3780839 | 3.9401512  |
| C | -0.0367340 | 0.7085774  | 4.2755944  |
| C | 1.3666919  | 0.6075972  | 4.2728907  |
| H | 3.0256740  | -0.7811013 | 4.0367611  |
| C | -2.3765277 | -0.2435114 | 4.0777344  |
| H | -0.5087316 | 1.6610942  | 4.5515995  |
| C | -2.9416648 | 1.0458760  | 3.4681529  |
| H | -2.6135035 | 1.9507829  | 4.0195964  |
| H | -4.0501645 | 1.0285787  | 3.5002970  |
| H | -2.6252184 | 1.1693241  | 2.4153506  |
| C | -2.7630004 | -0.3882080 | 5.5643012  |
| H | -2.8366899 | -1.0979683 | 3.5409767  |
| H | -2.3257548 | 0.4335291  | 6.1695613  |
| H | -2.4021904 | -1.3481574 | 5.9867571  |
| H | -3.8653145 | -0.3500440 | 5.6850633  |
| C | 2.2689902  | 1.7557799  | 4.7202301  |
| C | 1.5837946  | 3.1278951  | 4.6898143  |
| C | 2.3284199  | 3.9344222  | 4.8431991  |
| H | 0.8295867  | 3.2207142  | 5.4985760  |
| H | 1.0654133  | 3.3136086  | 3.7287121  |
| C | 2.8503858  | 1.4626639  | 6.1185395  |
| H | 3.1321218  | 1.7764899  | 4.0143391  |
| H | 3.5477070  | 2.2681617  | 6.4272815  |
| H | 3.4051775  | 0.5036102  | 6.1404000  |
| H | 2.0379597  | 1.4034786  | 6.8726096  |
| C | 1.8285924  | -3.0987046 | 3.2840984  |
| C | 2.9754794  | -2.9985111 | 2.2675001  |
| H | 3.3794030  | -4.0094713 | 2.0555263  |
| H | 3.8187624  | -2.3779721 | 2.6321407  |
| H | 2.6203737  | -2.5691833 | 1.3094110  |
| C | 2.2989626  | -3.7496249 | 4.6002603  |
| H | 1.0701945  | -3.7695960 | 2.8373042  |
| H | 2.7386523  | -4.7494102 | 4.4051477  |
| H | 1.4612290  | -3.8746258 | 5.3165091  |
| H | 3.0743353  | -3.1301435 | 5.0981428  |
| H | 0.8179852  | 3.1931994  | -5.7780877 |
| H | 1.2385988  | -2.6920567 | -5.8076428 |
| H | -4.9601095 | 1.9882875  | -4.0331183 |
| C | 1.3084619  | 2.1947073  | -5.7859000 |
| H | 2.1348359  | -3.4785173 | -2.8107031 |
| H | 3.3231644  | 3.0591819  | -5.8162255 |
| H | -3.8192537 | 3.0311924  | -2.0202437 |
| C | 0.4327683  | 1.2660542  | -4.9527132 |
| C | 0.5223204  | -3.1492727 | -5.0929501 |
| C | 2.7184320  | 2.3663123  | -5.1949407 |
| H | 3.2620116  | 1.3997426  | -5.1480925 |
| C | 0.8240347  | -0.0564093 | -4.6821965 |
| C | -3.9747477 | 1.6366659  | -4.4034670 |
| H | 0.3579987  | 1.6290420  | -7.6885642 |
| C | -0.8116316 | 1.6923290  | -4.4604865 |
| C | 1.3723305  | 1.7196544  | -7.2500129 |
| H | 1.9566039  | 2.4286320  | -7.8729898 |
| H | -1.1266154 | 2.7309189  | -4.6549370 |
| C | 1.8593988  | -2.4291826 | -3.0447091 |
| H | 0.8321788  | -4.2032906 | -4.9341363 |
| H | -0.4766852 | -3.1535681 | -5.5752322 |
| C | 0.0088317  | -0.9484365 | -3.9652840 |
| C | -2.8348138 | 2.6767225  | -2.3884876 |
| C | -1.6677082 | 0.8434540  | -3.7307069 |
| H | -4.1397659 | 0.7108729  | -4.9913059 |

|   |            |            |            |
|---|------------|------------|------------|
| H | -3.5817676 | 2.4064065  | -5.1005378 |
| C | 0.4965235  | -2.3807089 | -3.7581111 |
| C | -1.2589063 | -0.5007722 | -3.4978756 |
| C | -3.0022539 | 1.4012408  | -3.2318826 |
| H | 1.8402100  | -1.8470878 | -2.1038011 |
| H | -2.2024963 | 2.4814351  | -1.5028103 |
| H | 2.6668340  | -2.0092201 | -3.6805801 |
| H | 2.6756285  | 2.7769663  | -4.1674865 |
| H | -2.3789612 | 3.5071352  | -2.9667995 |
| H | 1.8600497  | 0.7249491  | -7.3239552 |
| H | -0.2345462 | -2.8988576 | -3.1060652 |
| H | -3.4582431 | 0.6400361  | -2.5676949 |
| H | 1.7991746  | -0.4138313 | -5.0491144 |
| H | 3.8938523  | 2.7203962  | 1.4004034  |

### TS2-8-d

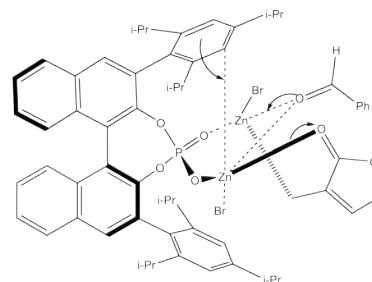

Energy(Hartree)= -11970.02210419  
number of imaginary frequencies: 1

|    |            |            |            |
|----|------------|------------|------------|
| Zn | 2.3584609  | 0.3328160  | 1.5228150  |
| Br | 4.6910324  | 0.3330373  | 1.7154082  |
| C  | 1.7061467  | 6.7915856  | 1.7976355  |
| C  | 1.6436366  | 5.4010532  | 1.6588849  |
| C  | 2.8412030  | 4.6500095  | 1.5833649  |
| C  | 4.0941530  | 5.3128753  | 1.6784153  |
| C  | 4.1471370  | 6.7002353  | 1.8248412  |
| C  | 2.9502184  | 7.4421938  | 1.8777865  |
| H  | 0.7710072  | 7.3691410  | 1.8509414  |
| H  | 0.6633927  | 4.8985412  | 1.6203824  |
| C  | 2.8718729  | 3.2080448  | 1.4240003  |
| H  | 5.0219186  | 4.7202454  | 1.6314532  |
| H  | 5.1183382  | 7.2119132  | 1.8994261  |
| H  | 2.9911392  | 8.5367486  | 1.9905208  |
| O  | 1.8698327  | 2.4345914  | 1.3794804  |
| C  | 3.5281917  | 3.8864547  | -1.5227034 |
| C  | 2.4081505  | 3.1014204  | -1.5615398 |
| C  | 2.9021928  | 1.6872444  | -1.4947446 |
| O  | 4.2667688  | 1.6780192  | -1.5895311 |
| C  | 4.7493614  | 3.0236299  | -1.6011769 |
| O  | 2.2607652  | 0.6658048  | -1.3200216 |
| C  | 0.9867575  | 3.4061992  | -1.5855940 |
| H  | 5.3309932  | 3.1914330  | -2.5371838 |
| H  | 5.4569315  | 3.1448919  | -0.7487731 |
| Zn | -0.0902900 | 2.8613327  | 0.0477741  |
| Br | -1.6511207 | 3.9172726  | 1.4676257  |
| H  | 0.4620269  | 2.7375823  | -2.3029131 |
| H  | 0.7789323  | 4.4671541  | -1.8202217 |
| H  | 3.5611035  | 4.9846861  | -1.5189472 |
| C  | -1.6344889 | -2.2897991 | 1.5655849  |
| C  | -2.1907145 | -3.2004822 | 0.6638641  |
| C  | -2.2244634 | -4.5915455 | 1.0530019  |
| C  | -2.6178769 | -5.6370092 | 0.1650672  |
| C  | -1.8103714 | -4.9539227 | 2.3895261  |
| C  | -1.8894358 | -6.3192393 | 2.7967559  |
| C  | -1.2553029 | -3.9648079 | 3.2547158  |
| H  | -0.8905209 | -4.2733317 | 4.2466979  |

|   |            |            |            |   |            |            |            |
|---|------------|------------|------------|---|------------|------------|------------|
| C | -1.0938593 | -2.6486309 | 2.8437595  | H | -3.8292212 | 3.0120164  | -2.0524947 |
| C | -2.1746486 | -1.4388287 | -2.7591865 | C | 0.4366070  | 1.2420425  | -4.9635335 |
| C | -3.4008624 | -1.8421662 | -3.2759055 | C | 0.5107657  | -3.1693820 | -5.0703562 |
| H | -3.6813203 | -1.5292493 | -4.2935055 | C | 2.6977397  | 2.3958703  | -5.1569437 |
| C | -4.3319151 | -2.5964629 | -2.5074383 | H | 3.2642278  | 1.4473132  | -5.0502967 |
| C | -5.6237036 | -2.9166852 | -3.0231905 | C | 0.8307998  | -0.0746359 | -4.6708920 |
| C | -3.9862003 | -3.0038764 | -1.1662760 | C | -3.9484625 | 1.6871303  | -4.4687742 |
| C | -4.9887582 | -3.6485598 | -0.3804293 | H | 0.4639365  | 1.4974149  | -7.7138834 |
| C | -2.6651709 | -2.7100994 | -0.6628288 | C | -0.8146693 | 1.6681172  | -4.4908860 |
| C | -1.8299931 | -1.9047382 | -1.4524769 | C | 1.4563599  | 1.6361391  | -7.2398240 |
| O | -1.6001313 | -0.9471253 | 1.2211336  | H | 2.0441945  | 2.3391351  | -7.8661346 |
| O | -0.5637778 | -1.5621671 | -0.9921628 | H | -1.1333866 | 2.7021543  | -4.7032360 |
| P | -0.4031011 | -0.4518217 | 0.2020553  | C | 1.8672444  | -2.4424253 | -3.0369707 |
| O | 0.9764364  | -0.7657830 | 0.8085304  | H | 0.8210168  | -4.2228736 | -4.9093222 |
| O | -0.7539858 | 0.9719059  | -0.1849834 | H | -0.4925950 | -3.1745645 | -5.5430325 |
| C | -2.3157059 | -7.3044134 | 1.9191390  | C | 0.0115779  | -0.9622817 | -3.9540607 |
| C | -2.6634957 | -6.9587430 | 0.5870505  | C | -2.8426609 | 2.6283879  | -2.3835154 |
| H | -1.5832172 | -6.5785832 | 3.8225105  | C | -1.6754279 | 0.8248649  | -3.7600456 |
| H | -2.3649829 | -8.3542484 | 2.2458895  | H | -4.1058683 | 0.7881254  | -5.0991414 |
| H | -2.8819070 | -5.3859287 | -0.8711911 | H | -3.5302903 | 2.4800367  | -5.1237073 |
| H | -2.9671168 | -7.7451110 | -0.1207242 | C | 0.4989787  | -2.3936708 | -3.7393446 |
| C | -6.2430399 | -3.9274257 | -0.9050619 | C | -1.2628636 | -0.5141323 | -3.5040259 |
| C | -6.5612098 | -3.5760800 | -2.2436445 | C | -3.0140940 | 1.3902309  | -3.2807475 |
| H | -4.7620651 | -3.9157820 | 0.6607647  | H | 1.8601660  | -1.8526350 | -2.1006836 |
| H | -6.9991526 | -4.4191385 | -0.2741246 | H | -2.2665223 | 2.3759677  | -1.4741236 |
| H | -7.5561788 | -3.8099901 | -2.6519499 | H | 2.6734301  | -2.0345251 | -3.6819669 |
| H | -5.8671536 | -2.6098973 | -4.0525873 | H | 2.5993224  | 2.8421305  | -4.1485746 |
| C | 1.1560695  | -1.7718477 | 3.5634990  | H | -2.3232135 | 3.4578776  | -2.9069856 |
| C | -0.2594129 | -1.6155832 | 3.5336860  | H | 1.9756532  | 0.6552347  | -7.2584734 |
| C | 1.9510947  | -0.6560642 | 3.9193898  | H | -0.2277844 | -2.9069751 | -3.0792390 |
| C | -0.8477404 | -0.3872369 | 3.9458295  | H | -3.5057351 | 0.6163063  | -2.6586526 |
| C | -0.0183925 | 0.6972224  | 4.2837517  | H | 1.8108339  | -0.4329099 | -5.0236524 |
| C | 1.3843202  | 0.5977487  | 4.2677030  | H | 3.8833906  | 2.7363536  | 1.4031792  |
| H | 3.0430699  | -0.7835468 | 3.9965233  |   |            |            |            |
| C | -2.3598832 | -0.2493892 | 4.0913840  |   |            |            |            |
| H | -0.4903682 | 1.6476103  | 4.5675491  |   |            |            |            |
| C | -2.9319668 | 1.0133086  | 3.4328182  |   |            |            |            |
| H | -2.5843941 | 1.9418691  | 3.9298497  |   |            |            |            |
| H | -4.0394386 | 1.0065770  | 3.4919668  |   |            |            |            |
| H | -2.6422756 | 1.0841696  | 2.3681711  |   |            |            |            |
| C | -2.7352836 | -0.3292244 | 5.5853786  |   |            |            |            |
| H | -2.8220834 | -1.1270603 | 3.5945180  |   |            |            |            |
| H | -2.2993204 | 0.5209089  | 6.1508581  |   |            |            |            |
| H | -2.3664463 | -1.2666942 | 6.0491829  |   |            |            |            |
| H | -3.8367650 | -0.2905475 | 5.7128369  |   |            |            |            |
| C | 2.2916901  | 1.7471804  | 4.7013941  |   |            |            |            |
| C | 1.5960543  | 3.1138465  | 4.7108771  |   |            |            |            |
| H | 2.3356679  | 3.9236267  | 4.8722660  |   |            |            |            |
| H | 0.8523272  | 3.1832614  | 5.5315735  |   |            |            |            |
| H | 1.0622684  | 3.3170662  | 3.7616525  |   |            |            |            |
| C | 2.9251398  | 1.4428138  | 6.0741793  |   |            |            |            |
| H | 3.1303888  | 1.7823920  | 3.9671758  |   |            |            |            |
| H | 3.6278790  | 2.2491736  | 6.3682748  |   |            |            |            |
| H | 3.4873946  | 0.4881223  | 6.0651773  |   |            |            |            |
| H | 2.1417757  | 1.3678834  | 6.8570235  |   |            |            |            |
| C | 1.8406058  | -3.0997917 | 3.2466827  |   |            |            |            |
| C | 2.9953456  | -2.9937505 | 2.2396304  |   |            |            |            |
| H | 3.4068399  | -4.0023421 | 2.0310521  |   |            |            |            |
| H | 3.8335276  | -2.3688906 | 2.6086700  |   |            |            |            |
| H | 2.6463315  | -2.5684057 | 1.2778812  |   |            |            |            |
| C | 2.3000365  | -3.7679788 | 4.5581528  |   |            |            |            |
| H | 1.0816834  | -3.7620053 | 2.7873778  |   |            |            |            |
| H | 2.7339478  | -4.7689958 | 4.3563443  |   |            |            |            |
| H | 1.4590245  | -3.8932313 | 5.2704284  |   |            |            |            |
| H | 3.0771032  | -3.1589570 | 5.0660485  |   |            |            |            |
| H | 0.8025605  | 3.1463948  | -5.8483855 |   |            |            |            |
| H | 1.2200185  | -2.7168253 | -5.7947843 |   |            |            |            |
| H | -4.9401562 | 2.0347539  | -4.1122675 |   |            |            |            |
| C | 1.3191536  | 2.1622271  | -5.7989327 |   |            |            |            |
| H | 2.1390223  | -3.4904685 | -2.7942560 |   |            |            |            |
| H | 3.3100552  | 3.0829090  | -5.7775087 |   |            |            |            |

### TS3-8-d; COSMO

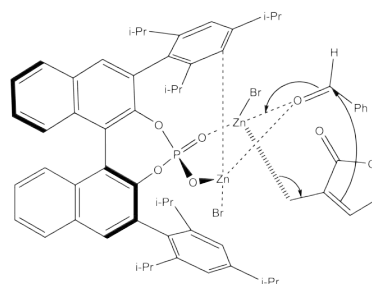

Energy(Hartree) = -11970.03403663

|    |           |            |            |
|----|-----------|------------|------------|
| Zn | 2.4500050 | 0.8657042  | 1.3598450  |
| Br | 4.8078551 | 0.7990579  | 1.1706692  |
| C  | 1.8693754 | 7.0472218  | -0.1497168 |
| C  | 1.7679950 | 5.6527710  | -0.0616437 |
| C  | 2.9350493 | 4.8551084  | -0.0686317 |
| C  | 4.2038425 | 5.4882023  | -0.1472595 |
| C  | 4.2988500 | 6.8800213  | -0.2239703 |
| C  | 3.1287503 | 7.6649153  | -0.2317990 |
| H  | 0.9518696 | 7.6550921  | -0.1435613 |
| H  | 0.7734680 | 5.1917108  | 0.0329271  |
| C  | 2.9219106 | 3.3958898  | 0.0211081  |
| H  | 5.1167925 | 4.8709591  | -0.1427508 |
| H  | 5.2873115 | 7.3611109  | -0.2752667 |
| H  | 3.2029270 | 8.7614653  | -0.2949070 |
| O  | 1.8904305 | 2.6968933  | 0.4071756  |
| C  | 3.3119849 | 3.0320469  | -2.3128674 |
| C  | 2.0924707 | 2.3829766  | -2.4797465 |
| C  | 2.3841204 | 0.9084194  | -2.3582735 |
| O  | 3.7407103 | 0.7320618  | -2.3240324 |
| C  | 4.4078627 | 2.0027757  | -2.3866428 |
| O  | 1.6016698 | -0.0150078 | -2.2961806 |
| C  | 0.7573770 | 2.8534296  | -2.5706855 |

|    |            |            |            |
|----|------------|------------|------------|
| H  | 4.9703522  | 2.0652834  | -3.3459239 |
| H  | 5.1454723  | 2.0387776  | -1.5560046 |
| Zn | -0.0190904 | 2.7553617  | -0.6200250 |
| Br | -1.6014316 | 4.2500425  | 0.2942739  |
| H  | 0.0448996  | 2.1188849  | -2.9938724 |
| H  | 0.6108507  | 3.8973164  | -2.8975981 |
| H  | 3.4971338  | 4.0934430  | -2.5194979 |
| C  | -1.3243989 | -1.7243637 | 2.2424583  |
| C  | -1.9208293 | -2.8657245 | 1.7041210  |
| C  | -1.8738234 | -4.0779695 | 2.4886804  |
| C  | -2.2919457 | -5.3449883 | 1.9827697  |
| C  | -1.3550689 | -4.0191841 | 3.8364771  |
| C  | -1.3539323 | -5.2024890 | 4.6348188  |
| C  | -0.7847123 | -2.8069286 | 4.3274502  |
| H  | -0.3540090 | -2.7964222 | 5.3406054  |
| C  | -0.6977058 | -1.6741833 | 3.5293453  |
| C  | -2.3654459 | -2.1713496 | -2.0580189 |
| C  | -3.6215718 | -2.7228488 | -2.2820164 |
| H  | -4.0284107 | -2.7278721 | -3.3047062 |
| C  | -4.4241146 | -3.2291012 | -1.2214738 |
| C  | -5.7513541 | -3.6972557 | -1.4614670 |
| C  | -3.9073066 | -3.2240960 | 0.1257834  |
| C  | -4.7847074 | -3.6171997 | 1.1819303  |
| C  | -2.5494989 | -2.7856507 | 0.3551325  |
| C  | -1.8473748 | -2.2312169 | -0.7266987 |
| O  | -1.3529707 | -0.5471963 | 1.5132754  |
| O  | -0.5464466 | -1.7609071 | -0.5465144 |
| P  | -0.2873034 | -0.3642319 | 0.2659583  |
| O  | 1.1686340  | -0.4544696 | 0.7614985  |
| O  | -0.7491840 | 0.9028118  | -0.4384386 |
| C  | -1.8028627 | -6.4106645 | 4.1222608  |
| C  | -2.2571325 | -6.4823305 | 2.7786176  |
| H  | -0.9680788 | -5.1406690 | 5.6646026  |
| H  | -1.7893994 | -7.3167174 | 4.7469850  |
| H  | -2.6395311 | -5.4166862 | 0.9430025  |
| H  | -2.5801715 | -7.4482950 | 2.3613828  |
| C  | -6.0782500 | -4.0472344 | 0.9186483  |
| C  | -6.5634781 | -4.1073855 | -0.4151088 |
| H  | -4.4320482 | -3.5647243 | 2.2209042  |
| H  | -6.7350379 | -4.3369283 | 1.7531416  |
| H  | -7.5876500 | -4.4589777 | -0.6124112 |
| H  | -6.1242341 | -3.7069220 | -2.4977564 |
| C  | 1.5497103  | -0.5769651 | 3.8080768  |
| C  | 0.1320202  | -0.4629370 | 3.8126599  |
| C  | 2.3235197  | 0.6129140  | 3.7519820  |
| C  | -0.4803561 | 0.8228133  | 3.8592673  |
| C  | 0.3223872  | 1.9756262  | 3.7952695  |
| C  | 1.7267863  | 1.9060499  | 3.7342336  |
| H  | 3.4199307  | 0.5378366  | 3.8376930  |
| C  | -1.9859440 | 0.9675348  | 4.0492637  |
| H  | -0.1673557 | 2.9586246  | 3.8008327  |
| C  | -2.6330802 | 1.9872879  | 3.1029329  |
| H  | -2.3019145 | 3.0251697  | 3.3111140  |
| H  | -3.7357233 | 1.9672206  | 3.2193346  |
| H  | -2.3918114 | 1.7692122  | 2.0456113  |
| C  | -2.2764080 | 1.2975353  | 5.5283886  |
| H  | -2.4441488 | -0.0210580 | 3.8435033  |
| H  | -1.8370598 | 2.2771893  | 5.8110739  |
| H  | -1.8549339 | 0.5287083  | 6.2076131  |
| H  | -3.3702742 | 1.3522408  | 5.7047521  |
| C  | 2.6110479  | 3.1504306  | 3.7691681  |
| C  | 1.8794140  | 4.4354895  | 3.3650079  |
| H  | 2.6030665  | 5.2623311  | 3.2231086  |
| H  | 1.1612220  | 4.7563583  | 4.1477882  |
| H  | 1.3167418  | 4.3089512  | 2.4202924  |
| C  | 3.2606991  | 3.2962149  | 5.1607965  |
| H  | 3.4399007  | 2.9751533  | 3.0442395  |
| H  | 3.9425707  | 4.1706207  | 5.1795333  |
| H  | 3.8487917  | 2.3988018  | 5.4381219  |
| H  | 2.4839089  | 3.4494364  | 5.9387925  |
| C  | 2.2626429  | -1.9230937 | 3.8960498  |

|   |            |            |            |
|---|------------|------------|------------|
| C | 3.3327088  | -2.1442867 | 2.8178717  |
| H | 3.7432892  | -3.1708679 | 2.9037557  |
| H | 4.1837870  | -1.4401169 | 2.9084945  |
| H | 2.9035649  | -2.0347949 | 1.8018391  |
| C | 2.8413357  | -2.1075606 | 5.3133546  |
| H | 1.4989335  | -2.7097067 | 3.7471792  |
| H | 3.3002766  | -3.1121891 | 5.4159925  |
| H | 2.0580264  | -2.0044651 | 6.0919736  |
| H | 3.6279214  | -1.3536818 | 5.5274242  |
| H | 0.0318578  | 1.2849972  | -6.7140464 |
| H | 0.4879736  | -4.3712903 | -5.1370987 |
| H | -5.3690492 | 0.7759557  | -3.7765986 |
| C | 0.6228959  | 0.3966865  | -6.3986140 |
| H | 1.8364857  | -4.3576430 | -2.2094122 |
| H | 2.5541151  | 1.3908890  | -6.7315141 |
| H | -3.9788686 | 2.3733028  | -2.3923609 |
| C | -0.1556902 | -0.2759111 | -5.2737232 |
| C | -0.1096405 | -4.5828053 | -4.2254866 |
| C | 1.9918305  | 0.9044114  | -5.9072314 |
| H | 2.6127236  | 0.0713567  | -5.5161106 |
| C | 0.2586485  | -1.5067843 | -4.7377729 |
| C | -4.4410135 | 0.3130238  | -4.1719453 |
| H | -0.2113802 | -0.8735464 | -7.9887209 |
| C | -1.3001536 | 0.3263158  | -4.7251926 |
| C | 0.7745232  | -0.5184451 | -7.6262533 |
| H | 1.2759446  | 0.0178267  | -8.4584723 |
| H | -1.6362859 | 1.2919878  | -5.1379372 |
| C | 1.5315059  | -3.3970984 | -2.6746239 |
| H | 0.2173483  | -5.5671711 | -3.8300120 |
| H | -1.1716306 | -4.6713398 | -4.5337906 |
| C | -0.4294140 | -2.1347783 | -3.6868183 |
| C | -3.0491639 | 1.9178743  | -2.7903778 |
| C | -2.0316955 | -0.2609369 | -3.6740859 |
| H | -4.6611638 | -0.7474116 | -4.4091798 |
| H | -4.1889128 | 0.8207781  | -5.1267387 |
| C | 0.0762496  | -3.4787673 | -3.1679056 |
| C | -1.5913992 | -1.5116271 | -3.1568556 |
| C | -3.2876934 | 0.4444242  | -3.1580392 |
| H | 1.6524047  | -2.5821870 | -1.9362115 |
| H | -2.2781763 | 2.0096831  | -2.0042438 |
| H | 2.2332039  | -3.1949074 | -3.5108444 |
| H | 1.8727992  | 1.6441254  | -5.0912724 |
| H | -2.7344230 | 2.5251189  | -3.6645491 |
| H | 1.3884507  | -1.4130055 | -7.3915802 |
| H | -0.5489995 | -3.7617791 | -2.2968564 |
| H | -3.6006666 | -0.0684504 | -2.2261021 |
| H | 1.1608714  | -1.9929092 | -5.1413765 |
| H | 3.9106888  | 2.9119641  | 0.1436322  |

### TS3-8-d

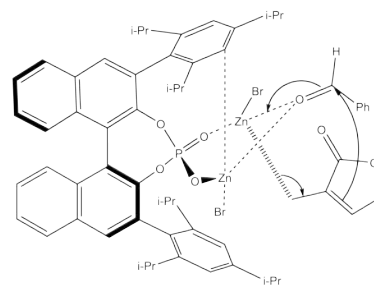

Energy(Hartree) = -11970.02297463  
number of imaginary frequencies: 1

|    |           |           |            |
|----|-----------|-----------|------------|
| Zn | 2.4601261 | 0.8596769 | 1.3545895  |
| Br | 4.8172766 | 0.8215198 | 1.2060154  |
| C  | 1.8884399 | 7.0476574 | -0.1792853 |
| C  | 1.7822955 | 5.6545488 | -0.0769200 |
| C  | 2.9470426 | 4.8538862 | -0.0753871 |
| C  | 4.2171858 | 5.4834109 | -0.1586883 |
| C  | 4.3163809 | 6.8737479 | -0.2499774 |

|    |            |            |            |   |            |            |            |
|----|------------|------------|------------|---|------------|------------|------------|
| C  | 3.1486440  | 7.6614387  | -0.2671458 | H | -2.4479389 | -0.0335650 | 3.8436167  |
| H  | 0.9714633  | 7.6562717  | -0.1792388 | H | -1.8542902 | 2.2719660  | 5.8067060  |
| H  | 0.7854175  | 5.1985264  | 0.0233340  | H | -1.8651832 | 0.5251063  | 6.2075750  |
| C  | 2.9313292  | 3.3948472  | 0.0284602  | H | -3.3830428 | 1.3411559  | 5.7006754  |
| H  | 5.1277439  | 4.8626055  | -0.1445905 | C | 2.5947605  | 3.1568547  | 3.7675717  |
| H  | 5.3061780  | 7.3517780  | -0.3048903 | C | 1.8586778  | 4.4375109  | 3.3572564  |
| H  | 3.2259205  | 8.7570736  | -0.3416974 | H | 2.5786956  | 5.2667402  | 3.2104090  |
| O  | 1.8996073  | 2.6995650  | 0.4122120  | H | 1.1402439  | 4.7605851  | 4.1389346  |
| C  | 3.3204264  | 3.0084166  | -2.3074732 | H | 1.2937643  | 4.3053809  | 2.4146564  |
| C  | 2.0921577  | 2.3759307  | -2.4725828 | C | 3.2453015  | 3.3122280  | 5.1575653  |
| C  | 2.3645862  | 0.8966650  | -2.3535846 | H | 3.4236495  | 2.9798163  | 3.0430872  |
| O  | 3.7183228  | 0.7019872  | -2.3159282 | H | 3.9244207  | 4.1888999  | 5.1724798  |
| C  | 4.4016515  | 1.9613447  | -2.3725130 | H | 3.8367318  | 2.4185214  | 5.4395080  |
| O  | 1.5683651  | -0.0144246 | -2.2971447 | H | 2.4693338  | 3.4664627  | 5.9361266  |
| C  | 0.7617840  | 2.8590247  | -2.5603932 | C | 2.2649967  | -1.9178140 | 3.9024473  |
| H  | 4.9738921  | 2.0149087  | -3.3273407 | C | 3.3348811  | -2.1354723 | 2.8232761  |
| H  | 5.1320318  | 1.9861916  | -1.5344293 | H | 3.7487198  | -3.1608673 | 2.9076772  |
| Zn | -0.0216838 | 2.7619781  | -0.6112938 | H | 4.1847357  | -1.4295689 | 2.9112802  |
| Br | -1.5664340 | 4.2616871  | 0.3385742  | H | 2.9047472  | -2.0283785 | 1.8075606  |
| H  | 0.0424452  | 2.1323005  | -2.9856104 | C | 2.8447083  | -2.1020142 | 5.3192155  |
| H  | 0.6236332  | 3.9049656  | -2.8841241 | H | 1.5030075  | -2.7061805 | 3.7534707  |
| H  | 3.5200612  | 4.0670425  | -2.5149238 | H | 3.3073593  | -3.1049427 | 5.4220068  |
| C  | -1.3189525 | -1.7282464 | 2.2430409  | H | 2.0620744  | -2.0011164 | 6.0988298  |
| C  | -1.9143405 | -2.8696500 | 1.7034300  | H | 3.6291760  | -1.3463128 | 5.5344008  |
| C  | -1.8674365 | -4.0821789 | 2.4873930  | H | 0.0267976  | 1.2955924  | -6.7102747 |
| C  | -2.2842128 | -5.3487427 | 1.9798568  | H | 0.4774127  | -4.3624505 | -5.1475402 |
| C  | -1.3510521 | -4.0245876 | 3.8359589  | H | -5.3675894 | 0.7849688  | -3.7619662 |
| C  | -1.3512594 | -5.2086150 | 4.6324034  | C | 0.6182962  | 0.4065610  | -6.3972631 |
| C  | -0.7830637 | -2.8121625 | 4.3284736  | H | 1.8361372  | -4.3609849 | -2.2233086 |
| H  | -0.3540517 | -2.8011059 | 5.3424306  | H | 2.5496722  | 1.4009136  | -6.7322082 |
| C  | -0.6954544 | -1.6787875 | 3.5317037  | H | -3.9732687 | 2.3797109  | -2.3757134 |
| C  | -2.3618943 | -2.1675199 | -2.0566465 | C | -0.1583846 | -0.2673016 | -5.2718626 |
| C  | -3.6176635 | -2.7193341 | -2.2801721 | C | -0.1170772 | -4.5749434 | -4.2342681 |
| H  | -4.0242527 | -2.7208644 | -3.3029419 | C | 1.9881864  | 0.9134865  | -5.9078650 |
| C  | -4.4187740 | -3.2296023 | -1.2209438 | H | 2.6096139  | 0.0800159  | -5.5186042 |
| C  | -5.7451432 | -3.6989443 | -1.4603790 | C | 0.2565086  | -1.4988817 | -4.7389885 |
| C  | -3.9005833 | -3.2280186 | 0.1255359  | C | -4.4403548 | 0.3226264  | -4.1596239 |
| C  | -4.7764418 | -3.6257093 | 1.1808969  | H | -0.2203883 | -0.8610401 | -7.9863563 |
| C  | -2.5431668 | -2.7884679 | 0.3547292  | C | -1.3010579 | 0.3345164  | -4.7200428 |
| C  | -1.8422899 | -2.2304426 | -0.7260773 | C | 0.7664216  | -0.5064688 | -7.6266446 |
| O  | -1.3463311 | -0.5507309 | 1.5167674  | H | 1.2662410  | 0.0297631  | -8.4598317 |
| O  | -0.5424773 | -1.7588827 | -0.5460830 | H | -1.6382431 | 1.3005622  | -5.1310242 |
| P  | -0.2829353 | -0.3634756 | 0.2677103  | C | 1.5323912  | -3.3985034 | -2.6848946 |
| O  | 1.1742844  | -0.4546097 | 0.7610856  | H | 0.2090198  | -5.5613731 | -3.8434345 |
| O  | -0.7459317 | 0.9058240  | -0.4310405 | H | -1.1800271 | -4.6596462 | -4.5396928 |
| C  | -1.7989384 | -6.4160536 | 4.1184669  | C | -0.4294079 | -2.1286740 | -3.6881342 |
| C  | -2.2507308 | -6.4863893 | 2.7745130  | C | -3.0456546 | 1.9242093  | -2.7778147 |
| H  | -0.9671176 | -5.1476912 | 5.6629145  | C | -2.0305802 | -0.2537191 | -3.6685349 |
| H  | -1.7862558 | -7.3225137 | 4.7425305  | H | -4.6612467 | -0.7370002 | -4.3992399 |
| H  | -2.6301190 | -5.4180661 | 0.9394853  | H | -4.1903635 | 0.8313351  | -5.1143058 |
| H  | -2.5729698 | -7.4518644 | 2.3556878  | C | 0.0755630  | -3.4747222 | -3.1740342 |
| C  | -6.0690134 | -4.0572555 | 0.9175773  | C | -1.5896697 | -1.5055302 | -3.1550963 |
| C  | -6.5554203 | -4.1139174 | -0.4152285 | C | -3.2848761 | 0.4515701  | -3.1480310 |
| H  | -4.4222678 | -3.5755406 | 2.2193531  | H | 1.6598309  | -2.5872357 | -1.9438606 |
| H  | -6.7242172 | -4.3507511 | 1.7519223  | H | -2.2733985 | 2.0150476  | -1.9929695 |
| H  | -7.5791350 | -4.4664765 | -0.6128571 | H | 2.2332109  | -3.1965366 | -3.5217841 |
| H  | -6.1189984 | -3.7052366 | -2.4963206 | H | 1.8706521  | 1.6520738  | -5.0906868 |
| C  | 1.5474282  | -0.5736995 | 3.8159519  | H | -2.7334892 | 2.5340306  | -3.6510958 |
| C  | 0.1293819  | -0.4650392 | 3.8179102  | H | 1.3798272  | -1.4019904 | -7.3949788 |
| C  | 2.3164239  | 0.6187223  | 3.7604463  | H | -0.5477221 | -3.7587210 | -2.3018637 |
| C  | -0.4881260 | 0.8183388  | 3.8612286  | H | -3.5961507 | -0.0627444 | -2.2163138 |
| C  | 0.3105207  | 1.9738121  | 3.7960317  | H | 1.1575450  | -1.9850653 | -5.1450279 |
| C  | 1.7150389  | 1.9090274  | 3.7386828  | H | 3.9198586  | 2.9098536  | 0.1522475  |
| H  | 3.4132502  | 0.5480101  | 3.8436320  |   |            |            |            |
| C  | -1.9948746 | 0.9578684  | 4.0473920  |   |            |            |            |
| H  | -0.1834969 | 2.9546786  | 3.7936225  |   |            |            |            |
| C  | -2.6456042 | 1.9718946  | 3.0974473  |   |            |            |            |
| H  | -2.3207790 | 3.0124817  | 3.3013863  |   |            |            |            |
| H  | -3.7482241 | 1.9469902  | 3.2119837  |   |            |            |            |
| H  | -2.4037453 | 1.7522519  | 2.0408417  |   |            |            |            |
| C  | -2.2888884 | 1.2899129  | 5.5252871  |   |            |            |            |

int1-8-d; COSMO

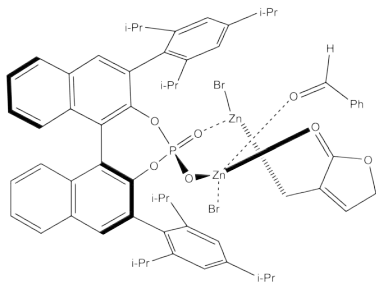

Energy(Hartree) = -11970.04283623

|    |            |            |            |
|----|------------|------------|------------|
| Zn | 2.7209956  | 0.7481860  | -0.1768289 |
| Br | 5.0070625  | 0.8181450  | 0.2557180  |
| C  | 0.3970522  | 6.5739324  | -0.3395515 |
| C  | 0.8129220  | 5.2549762  | -0.1424799 |
| C  | 2.1728178  | 4.9841693  | 0.1412214  |
| C  | 3.1088313  | 6.0438261  | 0.2294861  |
| C  | 2.6839708  | 7.3631213  | 0.0351872  |
| C  | 1.3298624  | 7.6258592  | -0.2491718 |
| H  | -0.6596483 | 6.7772516  | -0.5702006 |
| H  | 0.0907720  | 4.4276620  | -0.2190128 |
| C  | 2.6359807  | 3.6125355  | 0.3012676  |
| H  | 4.1645972  | 5.8206472  | 0.4512315  |
| H  | 3.4044451  | 8.1917488  | 0.1039430  |
| H  | 0.9983517  | 8.6645136  | -0.4034120 |
| O  | 1.8847716  | 2.6236670  | 0.1962606  |
| C  | 1.8604909  | 4.0394755  | -4.0171012 |
| C  | 1.3576341  | 2.8108851  | -3.6840198 |
| C  | 2.3384749  | 2.2255039  | -2.7469546 |
| O  | 3.3719524  | 3.0658368  | -2.5335057 |
| C  | 3.1565157  | 4.2635437  | -3.3130059 |
| O  | 2.2578290  | 1.1290714  | -2.1724566 |
| C  | 0.0992726  | 2.1149927  | -3.9639210 |
| H  | 4.0311622  | 4.3926778  | -3.9879385 |
| H  | 3.1420077  | 5.1259456  | -2.6085763 |
| Zn | -1.0168293 | 2.1607620  | -2.2879281 |
| Br | -2.3673603 | 3.8145702  | -1.2840056 |
| H  | 0.2566704  | 1.0299866  | -4.1219787 |
| H  | -0.4575169 | 2.5555523  | -4.8122195 |
| H  | 1.3984522  | 4.7857504  | -4.6771934 |
| C  | -1.1321939 | -1.0935521 | 2.3147601  |
| C  | -1.9602083 | -2.2089370 | 2.1328934  |
| C  | -2.0145297 | -3.1894186 | 3.1962650  |
| C  | -2.6592853 | -4.4565925 | 3.0601361  |
| C  | -1.3579474 | -2.8988430 | 4.4487442  |
| C  | -1.4558256 | -3.8303523 | 5.5263438  |
| C  | -0.5508061 | -1.7318807 | 4.5635811  |
| H  | -0.0041736 | -1.5551673 | 5.5024807  |
| C  | -0.3580295 | -0.8662599 | 3.4939702  |
| C  | -2.5960988 | -2.6634332 | -1.6326678 |
| C  | -3.8962996 | -3.1574181 | -1.6218308 |
| H  | -4.3526474 | -3.4965592 | -2.5648078 |
| C  | -4.6820303 | -3.1791070 | -0.4337283 |
| C  | -6.0544112 | -3.5718765 | -0.4639285 |
| C  | -4.0984705 | -2.7497659 | 0.8143868  |
| C  | -4.9455375 | -2.6600986 | 1.9595305  |
| C  | -2.6945868 | -2.4113604 | 0.8524223  |
| C  | -2.0154040 | -2.3157448 | -0.3693931 |
| O  | -1.0716587 | -0.1164029 | 1.3284826  |
| O  | -0.6764660 | -1.9469738 | -0.3790377 |
| P  | -0.2450751 | -0.3929317 | -0.0668072 |
| O  | 1.2711082  | -0.4856789 | 0.1725483  |
| O  | -0.7993447 | 0.5983175  | -1.0735025 |
| C  | -2.1306675 | -5.0317792 | 5.3723438  |
| C  | -2.7164525 | -5.3529704 | 4.1190271  |
| H  | -0.9606702 | -3.5833331 | 6.4786859  |
| H  | -2.1923650 | -5.7453333 | 6.2081253  |

|   |            |            |            |
|---|------------|------------|------------|
| H | -3.1083009 | -4.7310163 | 2.0964215  |
| H | -3.2153663 | -6.3244768 | 3.9812348  |
| C | -6.2837521 | -3.0236961 | 1.8916526  |
| C | -6.8415144 | -3.5025491 | 0.6759937  |
| H | -4.5278857 | -2.2862623 | 2.9048058  |
| H | -6.9180813 | -2.9351990 | 2.7868661  |
| H | -7.9008434 | -3.7989200 | 0.6368023  |
| H | -6.4825147 | -3.9115970 | -1.4202668 |
| C | 2.0776335  | -0.2733312 | 3.4230168  |
| C | 0.7226189  | 0.1694345  | 3.5114810  |
| C | 3.1001636  | 0.6886829  | 3.4538425  |
| C | 0.4325966  | 1.5536287  | 3.5922988  |
| C | 1.4994469  | 2.4740835  | 3.6520237  |
| C | 2.8418668  | 2.0670896  | 3.5968335  |
| H | 4.1444491  | 0.3522659  | 3.3664331  |
| C | -1.0004565 | 2.0760278  | 3.6398283  |
| H | 1.2579416  | 3.5433119  | 3.7405072  |
| C | -1.3021016 | 3.0131804  | 2.4568883  |
| H | -0.6774427 | 3.9308091  | 2.4914835  |
| H | -2.3635049 | 3.3355563  | 2.4692472  |
| H | -1.1196703 | 2.5131749  | 1.4866880  |
| C | -1.3093957 | 2.7467544  | 4.9909100  |
| H | -1.6775895 | 1.2019914  | 3.5487193  |
| H | -0.6766900 | 3.6448595  | 5.1516221  |
| H | -1.1281341 | 2.0524201  | 5.8366938  |
| H | -2.3693384 | 3.0726884  | 5.0338016  |
| C | 4.0183358  | 3.0368490  | 3.6941652  |
| C | 3.6177220  | 4.5164439  | 3.7178257  |
| H | 4.5191498  | 5.1619011  | 3.6975474  |
| H | 3.0529029  | 4.7657301  | 4.6406450  |
| H | 2.9822807  | 4.8018915  | 2.8566791  |
| C | 4.9002456  | 2.7121271  | 4.9172509  |
| H | 4.6403832  | 2.8566338  | 2.7855354  |
| H | 5.7904222  | 3.3739258  | 4.9481087  |
| H | 5.2587471  | 1.6642277  | 4.9036023  |
| H | 4.3295544  | 2.8609544  | 5.8580499  |
| C | 2.4542750  | -1.7551066 | 3.3392281  |
| C | 3.4394818  | -2.0788301 | 2.2046740  |
| H | 3.6311390  | -3.1712025 | 2.1700258  |
| H | 4.4175141  | -1.5723079 | 2.3326983  |
| H | 3.0278984  | -1.7743607 | 1.2240929  |
| C | 3.0040948  | -2.2459732 | 4.6931206  |
| H | 1.5284434  | -2.3261342 | 3.1277680  |
| H | 3.2250564  | -3.3329844 | 4.6578043  |
| H | 2.2853729  | -2.0694766 | 5.5184208  |
| H | 3.9448988  | -1.7161014 | 4.9522612  |
| H | 0.2955129  | -0.1558767 | -6.5581529 |
| H | 0.3866519  | -5.5415432 | -3.9350867 |
| H | -5.4707110 | -0.3384512 | -4.8083364 |
| C | 0.7203134  | -1.1196714 | -6.1991784 |
| H | 1.6144997  | -4.8431303 | -1.0386549 |
| H | 2.7530930  | -0.3750060 | -6.5422507 |
| H | -4.4769913 | 1.2394839  | -3.0624971 |
| C | -0.1772184 | -1.5950324 | -5.0635991 |
| C | -0.2487143 | -5.5312845 | -3.0244340 |
| C | 2.1611799  | -0.8479441 | -5.7319706 |
| H | 2.6816261  | -1.7868086 | -5.4500407 |
| C | 0.2208731  | -2.6259791 | -4.1950811 |
| C | -4.4589133 | -0.7645741 | -4.9679488 |
| H | -0.3410003 | -2.2653714 | -7.7497418 |
| C | -1.4458190 | -1.0271834 | -4.8627630 |
| C | 0.6922544  | -2.1093002 | -7.3792403 |
| H | 1.3108527  | -1.7403628 | -8.2238205 |
| H | -1.7802566 | -0.2342802 | -5.5518577 |
| C | 1.3481076  | -4.0236045 | -1.7374647 |
| H | 0.0500485  | -6.3937617 | -2.3929631 |
| H | -1.2986836 | -5.6869928 | -3.3460603 |
| C | -0.5717347 | -3.0394384 | -3.1117184 |
| C | -3.4948481 | 0.7323665  | -3.1533852 |
| C | -2.2894111 | -1.4099636 | -3.8016997 |
| H | -4.5769208 | -1.8079006 | -5.3251093 |



|   |            |            |            |
|---|------------|------------|------------|
| H | -3.9819638 | -0.1826062 | -5.7837583 |
| C | -0.0903098 | -4.2068450 | -2.2514920 |
| C | -1.8240916 | -2.3986736 | -2.8851236 |
| C | -3.6434686 | -0.7089131 | -3.6647398 |
| H | 1.4603445  | -3.0627620 | -1.1988491 |
| H | -3.0368394 | 0.7389724  | -2.1435635 |
| H | 2.0875683  | -4.0473311 | -2.5650454 |
| H | 2.1828038  | -0.1796728 | -4.8475832 |
| H | -2.8813474 | 1.3453207  | -3.8506654 |
| H | 1.0925474  | -3.0986289 | -7.0726194 |
| H | -0.7522223 | -4.2728735 | -1.3647736 |
| H | -4.2303904 | -1.2457289 | -2.8963043 |
| H | 1.1918121  | -3.1193018 | -4.3563432 |
| H | 3.7268277  | 3.4555597  | 0.4984582  |

### int1-8-d

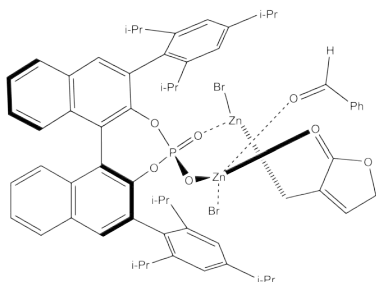

Energy(Hartree)= -11970.03013108

|    |            |            |            |
|----|------------|------------|------------|
| Zn | 2.7437995  | 0.7254487  | -0.1566650 |
| Br | 5.0152142  | 0.8551937  | 0.3009323  |
| C  | 0.4000270  | 6.5486801  | -0.3752562 |
| C  | 0.8119679  | 5.2313438  | -0.1576153 |
| C  | 2.1643608  | 4.9626873  | 0.1572972  |
| C  | 3.0974550  | 6.0230803  | 0.2580010  |
| C  | 2.6771107  | 7.3406942  | 0.0440174  |
| C  | 1.3297264  | 7.6010745  | -0.2728105 |
| H  | -0.6522613 | 6.7435683  | -0.6320688 |
| H  | 0.0890843  | 4.4053670  | -0.2442592 |
| C  | 2.6234804  | 3.5887166  | 0.3306321  |
| H  | 4.1478972  | 5.8008699  | 0.5053356  |
| H  | 3.3956897  | 8.1701968  | 0.1230962  |
| H  | 1.0022830  | 8.6387313  | -0.4425074 |
| O  | 1.8744947  | 2.6028876  | 0.2067134  |
| C  | 1.8490958  | 4.0323327  | -4.0011275 |
| C  | 1.3625815  | 2.7954559  | -3.6734111 |
| C  | 2.3473839  | 2.2228090  | -2.7290882 |
| O  | 3.3654670  | 3.0828258  | -2.5064396 |
| C  | 3.1349044  | 4.2768247  | -3.2830921 |
| O  | 2.2820822  | 1.1259251  | -2.1589919 |
| C  | 0.1178902  | 2.0825540  | -3.9573857 |
| H  | 4.0149853  | 4.4242705  | -3.9483179 |
| H  | 3.0972402  | 5.1361540  | -2.5749525 |
| Zn | -1.0134165 | 2.1656848  | -2.2866669 |
| Br | -2.3470979 | 3.8348990  | -1.3143318 |
| H  | 0.2833412  | 0.9951160  | -4.0849302 |
| H  | -0.4349812 | 2.5008925  | -4.8191852 |
| H  | 1.3775481  | 4.7713541  | -4.6623456 |
| C  | -1.1217432 | -1.0897698 | 2.3040667  |
| C  | -1.9510620 | -2.2050279 | 2.1259222  |
| C  | -2.0065123 | -3.1824294 | 3.1919200  |
| C  | -2.6523337 | -4.4491665 | 3.0592286  |
| C  | -1.3504133 | -2.8891500 | 4.4437091  |
| C  | -1.4496567 | -3.8177364 | 5.5230533  |
| C  | -0.5436528 | -1.7221428 | 4.5551816  |
| H  | 0.0033214  | -1.5416818 | 5.4931899  |
| C  | -0.3493852 | -0.8592954 | 3.4837989  |
| C  | -2.5940048 | -2.6645749 | -1.6376875 |

|   |            |            |            |
|---|------------|------------|------------|
| C | -3.8940139 | -3.1583370 | -1.6232884 |
| H | -4.3514224 | -3.4970647 | -2.5659706 |
| C | -4.6773721 | -3.1791206 | -0.4340103 |
| C | -6.0492225 | -3.5723295 | -0.4597419 |
| C | -4.0910831 | -2.7474973 | 0.8118059  |
| C | -4.9357661 | -2.6557303 | 1.9582201  |
| C | -2.6869653 | -2.4101419 | 0.8469071  |
| C | -2.0096073 | -2.3171838 | -0.3760254 |
| O | -1.0579327 | -0.1167162 | 1.3149742  |
| O | -0.6702204 | -1.9525567 | -0.3891253 |
| P | -0.2314554 | -0.3997037 | -0.0782581 |
| O | 1.2839024  | -0.5021452 | 0.1641949  |
| O | -0.7747937 | 0.5904724  | -1.0913243 |
| C | -2.1254983 | -5.0183705 | 5.3724968  |
| C | -2.7111098 | -5.3420068 | 4.1204076  |
| H | -0.9541629 | -3.5685811 | 6.4746465  |
| H | -2.1879829 | -5.7294591 | 6.2102447  |
| H | -3.1011365 | -4.7248780 | 2.0958918  |
| H | -3.2112556 | -6.3131420 | 3.9849546  |
| C | -6.2734126 | -3.0203039 | 1.8941654  |
| C | -6.8336008 | -3.5016143 | 0.6812868  |
| H | -4.5150406 | -2.2801366 | 2.9012633  |
| H | -6.9054683 | -2.9303945 | 2.7907563  |
| H | -7.8927552 | -3.7987468 | 0.6448831  |
| H | -6.4793309 | -3.9138575 | -1.4145444 |
| C | 2.0861663  | -0.2644211 | 3.4280006  |
| C | 0.7301559  | 0.1772944  | 3.5043546  |
| C | 3.1071904  | 0.6984086  | 3.4693800  |
| C | 0.4378728  | 1.5610702  | 3.5835613  |
| C | 1.5034719  | 2.4817901  | 3.6567365  |
| C | 2.8463517  | 2.0757018  | 3.6147276  |
| H | 4.1525033  | 0.3635544  | 3.3888643  |
| C | -0.9960463 | 2.0823421  | 3.6174920  |
| H | 1.2598440  | 3.5504047  | 3.7473565  |
| C | -1.2890790 | 3.0165659  | 2.4302298  |
| H | -0.6638806 | 3.9338832  | 2.4661717  |
| H | -2.3498040 | 3.3404971  | 2.4332062  |
| H | -1.1034106 | 2.5132141  | 1.4625594  |
| C | -1.3173801 | 2.7542957  | 4.9648972  |
| H | -1.6714808 | 1.2076000  | 3.5217818  |
| H | -0.6876566 | 3.6534798  | 5.1307142  |
| H | -1.1419479 | 2.0618168  | 5.8132012  |
| H | -2.3778797 | 3.0791953  | 4.9985877  |
| C | 4.0224603  | 3.0436789  | 3.7308699  |
| C | 3.6237729  | 4.5238733  | 3.7472439  |
| H | 4.5258587  | 5.1689721  | 3.7423075  |
| H | 3.0449942  | 4.7748369  | 4.6608341  |
| H | 3.0016603  | 4.8101253  | 2.8766136  |
| C | 4.8817706  | 2.7187241  | 4.9696761  |
| H | 4.6598383  | 2.8610341  | 2.8333120  |
| H | 5.7732023  | 3.3779259  | 5.0167625  |
| H | 5.2374257  | 1.6700159  | 4.9631568  |
| H | 4.2946479  | 2.8684244  | 5.8999547  |
| C | 2.4667108  | -1.7455435 | 3.3487354  |
| C | 3.4497165  | -2.0710866 | 2.2127389  |
| H | 3.6547789  | -3.1612469 | 2.1897906  |
| H | 4.4222470  | -1.5509852 | 2.3261194  |
| H | 3.0283082  | -1.7857676 | 1.2306317  |
| C | 3.0213821  | -2.2285832 | 4.7033490  |
| H | 1.5422619  | -2.3206619 | 3.1428022  |
| H | 3.2432194  | -3.3154805 | 4.6736064  |
| H | 2.3054601  | -2.0480408 | 5.5301727  |
| H | 3.9622836  | -1.6969245 | 4.9578268  |
| H | 0.2820880  | -0.1530577 | -6.5689540 |
| H | 0.3705533  | -5.5440330 | -3.9567640 |
| H | -5.4789311 | -0.3265719 | -4.7924070 |
| C | 0.7011324  | -1.1232501 | -6.2200964 |
| H | 1.6153459  | -4.8511208 | -1.0636117 |
| H | 2.7373026  | -0.3979747 | -6.5844573 |
| H | -4.4707677 | 1.2458218  | -3.0436635 |
| C | -0.1893608 | -1.5959294 | -5.0777963 |

|   |            |            |            |
|---|------------|------------|------------|
| C | -0.2592286 | -5.5330538 | -3.0423839 |
| C | 2.1496932  | -0.8672066 | -5.7689272 |
| H | 2.6649438  | -1.8115107 | -5.4962064 |
| C | 0.2115219  | -2.6273047 | -4.2117005 |
| C | -4.4680776 | -0.7525539 | -4.9580993 |
| H | -0.3898245 | -2.2512214 | -7.7628429 |
| C | -1.4557728 | -1.0263605 | -4.8699652 |
| C | 0.6491945  | -2.1063141 | -7.4046984 |
| H | 1.2612292  | -1.7405289 | -8.2553978 |
| H | -1.7921758 | -0.2323579 | -5.5568731 |
| C | 1.3475405  | -4.0308334 | -1.7607743 |
| H | 0.0408447  | -6.3974209 | -2.4142525 |
| H | -1.3109710 | -5.6855639 | -3.3590580 |
| C | -0.5764982 | -3.0410326 | -3.1253732 |
| C | -3.4915324 | 0.7347222  | -3.1420423 |
| C | -2.2945247 | -1.4082141 | -3.8052911 |
| H | -4.5877190 | -1.7934801 | -5.3213047 |
| H | -3.9957146 | -0.1669903 | -5.7739819 |
| C | -0.0933548 | -4.2101538 | -2.2686624 |
| C | -1.8265882 | -2.3989601 | -2.8925703 |
| C | -3.6459467 | -0.7038232 | -3.6589597 |
| H | 1.4653647  | -3.0710007 | -1.2218539 |
| H | -3.0287697 | 0.7370032  | -2.1344573 |
| H | 2.0841988  | -4.0559431 | -2.5907639 |
| H | 2.1891658  | -0.2021430 | -4.8828874 |
| H | -2.8798481 | 1.3494332  | -3.8393554 |
| H | 1.0422078  | -3.1012215 | -7.1074580 |
| H | -0.7513093 | -4.2752183 | -1.3789534 |
| H | -4.2301432 | -1.2425486 | -2.8896998 |
| H | 1.1811866  | -3.1215432 | -4.3771531 |
| H | 3.7099269  | 3.4277250  | 0.5513519  |

|    |            |            |            |
|----|------------|------------|------------|
| H  | 5.2166420  | 1.9289113  | -1.6948602 |
| Zn | -0.0680335 | 2.7873197  | -0.7002654 |
| Br | -1.5948359 | 4.2053046  | 0.4375859  |
| H  | 0.1590009  | 2.2087829  | -3.0543783 |
| H  | 0.7881674  | 3.9256409  | -2.8984491 |
| H  | 3.6669131  | 3.9951007  | -2.6891602 |
| C  | -1.3402470 | -1.7157837 | 2.2594938  |
| C  | -1.9532151 | -2.8445034 | 1.7119517  |
| C  | -1.9090863 | -4.0690749 | 2.4771726  |
| C  | -2.3492846 | -5.3235127 | 1.9583942  |
| C  | -1.3687512 | -4.0378178 | 3.8173951  |
| C  | -1.3688292 | -5.2333714 | 4.5972372  |
| C  | -0.7767066 | -2.8400471 | 4.3176945  |
| H  | -0.3287708 | -2.8507672 | 5.3233338  |
| C  | -0.6925316 | -1.6949007 | 3.5373734  |
| C  | -2.3930803 | -2.1146742 | -2.0422079 |
| C  | -3.6571592 | -2.6464388 | -2.2696366 |
| H  | -4.0633417 | -2.6417205 | -3.2925548 |
| C  | -4.4672761 | -3.1481280 | -1.2123433 |
| C  | -5.8008862 | -3.5962051 | -1.4552401 |
| C  | -3.9500854 | -3.1625124 | 0.1347755  |
| C  | -4.8307455 | -3.5562148 | 1.1878696  |
| C  | -2.5877423 | -2.7420056 | 0.3671514  |
| C  | -1.8786380 | -2.1872556 | -0.7098498 |
| O  | -1.3714124 | -0.5271632 | 1.5508692  |
| O  | -0.5766092 | -1.7295224 | -0.5215055 |
| P  | -0.3180288 | -0.3305454 | 0.2908671  |
| O  | 1.1379701  | -0.4302188 | 0.7847813  |
| O  | -0.7924038 | 0.9325453  | -0.4058986 |
| C  | -1.8399248 | -6.4281641 | 4.0733713  |
| C  | -2.3156467 | -6.4734460 | 2.7359959  |
| H  | -0.9662544 | -5.1919395 | 5.6216464  |
| H  | -1.8274582 | -7.3439758 | 4.6837353  |
| H  | -2.7131095 | -5.3754480 | 0.9230676  |
| H  | -2.6563786 | -7.4289701 | 2.3088812  |
| C  | -6.1300920 | -3.9666271 | 0.9217566  |
| C  | -6.6174324 | -4.0059487 | -0.4120498 |
| H  | -4.4752588 | -3.5196540 | 2.2266912  |
| H  | -6.7896167 | -4.2572527 | 1.7537835  |
| H  | -7.6464033 | -4.3418158 | -0.6118497 |
| H  | -6.1749341 | -3.5911763 | -2.4911707 |
| C  | 1.5646222  | -0.6105652 | 3.8032565  |
| C  | 0.1474655  | -0.4938267 | 3.8338761  |
| C  | 2.3411127  | 0.5793169  | 3.7632409  |
| C  | -0.4607691 | 0.7907767  | 3.9266113  |
| C  | 0.3433124  | 1.9440146  | 3.8802733  |
| C  | 1.7452476  | 1.8737726  | 3.7923076  |
| H  | 3.4384535  | 0.5007563  | 3.8390664  |
| C  | -1.9621158 | 0.9305845  | 4.1486046  |
| H  | -0.1449944 | 2.9268756  | 3.9204769  |
| C  | -2.6267355 | 1.9756432  | 3.2433682  |
| H  | -2.2949085 | 3.0078612  | 3.4774492  |
| H  | -3.7272845 | 1.9482784  | 3.3770537  |
| H  | -2.4003558 | 1.7902375  | 2.1765653  |
| C  | -2.2236243 | 1.2184023  | 5.6419191  |
| H  | -2.4241959 | -0.0519678 | 3.9239064  |
| H  | -1.7784650 | 2.1897024  | 5.9437886  |
| H  | -1.7899274 | 0.4304925  | 6.2909345  |
| H  | -3.3139243 | 1.2682196  | 5.8403657  |
| C  | 2.6321365  | 3.1152636  | 3.8425328  |
| C  | 1.8980432  | 4.4120656  | 3.4791039  |
| H  | 2.6224216  | 5.2402425  | 3.3477643  |
| H  | 1.1943277  | 4.7161252  | 4.2813439  |
| H  | 1.3151684  | 4.3111112  | 2.5429498  |
| C  | 3.3027412  | 3.2291784  | 5.2272834  |
| H  | 3.4508639  | 2.9534139  | 3.1027786  |
| H  | 3.9877210  | 4.1009068  | 5.2552722  |
| H  | 3.8915917  | 2.3240239  | 5.4761354  |
| H  | 2.5377558  | 3.3674868  | 6.0195177  |
| C  | 2.2721577  | -1.9613757 | 3.8501626  |
| C  | 3.3483624  | -2.1535386 | 2.7729409  |

## int2-8-d; COSMO

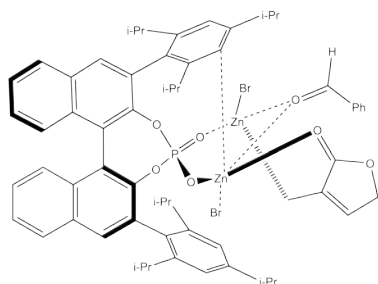

Energy(Hartree) = -11970.03555455

|    |           |            |            |
|----|-----------|------------|------------|
| Zn | 2.4502151 | 0.8377071  | 1.3971024  |
| Br | 4.7966370 | 0.7866971  | 1.1084397  |
| C  | 1.7581194 | 7.0215740  | -0.3803883 |
| C  | 1.6961901 | 5.6531292  | -0.0944908 |
| C  | 2.8861857 | 4.8862069  | -0.0602605 |
| C  | 4.1360743 | 5.5233185  | -0.2901904 |
| C  | 4.1901568 | 6.8908102  | -0.5654210 |
| C  | 2.9978614 | 7.6411252  | -0.6181035 |
| H  | 0.8287141 | 7.6100481  | -0.4093433 |
| H  | 0.7225997 | 5.1848199  | 0.1184330  |
| C  | 2.9151346 | 3.4636721  | 0.2190899  |
| H  | 5.0610849 | 4.9258557  | -0.2539186 |
| H  | 5.1595036 | 7.3806336  | -0.7413654 |
| H  | 3.0396484 | 8.7188475  | -0.8393738 |
| O  | 1.9120334 | 2.7403716  | 0.5320342  |
| C  | 3.4417488 | 2.9313273  | -2.5374590 |
| C  | 2.1994640 | 2.3520152  | -2.4991146 |
| C  | 2.4299456 | 0.8753199  | -2.3430546 |
| O  | 3.7779595 | 0.6261273  | -2.4085813 |
| C  | 4.4918696 | 1.8614070  | -2.5376330 |
| O  | 1.6140825 | -0.0084293 | -2.1817059 |
| C  | 0.8536031 | 2.8895829  | -2.5180111 |
| H  | 5.0777231 | 1.8424941  | -3.4850781 |

|   |            |            |            |    |            |            |            |
|---|------------|------------|------------|----|------------|------------|------------|
| H | 3.7549329  | -3.1836247 | 2.8306430  | H  | 0.7598344  | 5.1961203  | 0.0845610  |
| H | 4.2019924  | -1.4562030 | 2.8895663  | C  | 2.9368815  | 3.4495431  | 0.1951777  |
| H | 2.9261458  | -2.0145664 | 1.7574474  | H  | 5.0985591  | 4.8976121  | -0.2451211 |
| C | 2.8419134  | -2.1920536 | 5.2645788  | H  | 5.2260983  | 7.3558343  | -0.7118822 |
| H | 1.5054345  | -2.7391403 | 3.6719409  | H  | 3.1203585  | 8.7151312  | -0.8218546 |
| H | 3.2960879  | -3.2013265 | 5.3387985  | O  | 1.9271645  | 2.7396702  | 0.5186179  |
| H | 2.0550473  | -2.1093466 | 6.0419379  | C  | 3.4372076  | 2.8997850  | -2.5017526 |
| H | 3.6300886  | -1.4479747 | 5.5053992  | C  | 2.1862373  | 2.3338454  | -2.4852979 |
| H | 0.0757557  | 1.2824649  | -6.7052635 | C  | 2.3992307  | 0.8521962  | -2.3332648 |
| H | 0.4693535  | -4.3555226 | -5.0764276 | O  | 3.7442117  | 0.5889455  | -2.3810073 |
| H | -5.3527600 | 0.8555682  | -3.7963634 | C  | 4.4733165  | 1.8138763  | -2.5004831 |
| C | 0.6573384  | 0.3928513  | -6.3762248 | O  | 1.5698357  | -0.0204871 | -2.1880645 |
| H | 1.7952295  | -4.3342444 | -2.1333304 | C  | 0.8494430  | 2.8819193  | -2.5095377 |
| H | 2.5978399  | 1.3684768  | -6.7084400 | H  | 5.0629066  | 1.7906640  | -3.4461938 |
| H | -3.9441227 | 2.4503496  | -2.4161073 | H  | 5.1946003  | 1.8657090  | -1.6533240 |
| C | -0.1343253 | -0.2605630 | -5.2492306 | Zn | -0.0637604 | 2.7934776  | -0.6762448 |
| C | -0.1364166 | -4.5560572 | -4.1677199 | Br | -1.5344398 | 4.2330827  | 0.4833378  |
| C | 2.0272586  | 0.8947531  | -5.8823231 | H  | 0.1419390  | 2.2021999  | -3.0292506 |
| H | 2.6401388  | 0.0612501  | -5.4794500 | H  | 0.7864804  | 3.9188835  | -2.8868449 |
| C | 0.2673533  | -1.4875256 | -4.6950552 | H  | 3.6747175  | 3.9600919  | -2.6576517 |
| C | -4.4292885 | 0.3763199  | -4.1829447 | C  | -1.3348854 | -1.7202961 | 2.2589205  |
| H | -0.1787699 | -0.8877297 | -7.9574813 | C  | -1.9414744 | -2.8522578 | 1.7109186  |
| C | -1.2799957 | 0.3545117  | -4.7181747 | C  | -1.8949712 | -4.0752943 | 2.4782806  |
| C | 0.8080296  | -0.5377142 | -7.5924417 | C  | -2.3266164 | -5.3321670 | 1.9589230  |
| H | 1.3199986  | -0.0156963 | -8.4273393 | C  | -1.3625803 | -4.0399017 | 3.8213569  |
| H | -1.6043960 | 1.3190677  | -5.1426185 | C  | -1.3623786 | -5.2343273 | 4.6020831  |
| C | 1.5051151  | -3.3760351 | -2.6127528 | C  | -0.7795412 | -2.8384702 | 4.3227152  |
| H | 0.1787840  | -5.5409568 | -3.7639490 | H  | -0.3375946 | -2.8443093 | 5.3311732  |
| H | -1.1970655 | -4.6368495 | -4.4828169 | C  | -0.6949341 | -1.6946086 | 3.5408198  |
| C | -0.4373031 | -2.1021907 | -3.6472101 | C  | -2.3853945 | -2.1179590 | -2.0418226 |
| C | -3.0233044 | 1.9822057  | -2.8198134 | C  | -3.6458805 | -2.6572925 | -2.2694702 |
| C | -2.0262819 | -0.2176085 | -3.6691362 | H  | -4.0510304 | -2.6514348 | -3.2927581 |
| H | -4.6619530 | -0.6840921 | -4.4076361 | C  | -4.4524061 | -3.1671205 | -1.2138580 |
| H | -4.1679555 | 0.8688677  | -5.1432146 | C  | -5.7825358 | -3.6237489 | -1.4568538 |
| C | 0.0525923  | -3.4472075 | -3.1156227 | C  | -3.9346816 | -3.1809578 | 0.1327723  |
| C | -1.6024410 | -1.4676673 | -3.1368127 | C  | -4.8128345 | -3.5821324 | 1.1848033  |
| C | -3.2772434 | 0.5065552  | -3.1675063 | C  | -2.5746702 | -2.7529486 | 0.3655068  |
| H | 1.6304686  | -2.5523287 | -1.8849686 | C  | -1.8689632 | -2.1917553 | -0.7104056 |
| H | -2.2424537 | 2.0740714  | -2.0434557 | O  | -1.3661839 | -0.5332570 | 1.5500129  |
| H | 2.2149054  | -3.1937877 | -3.4468411 | O  | -0.5684772 | -1.7292024 | -0.5230532 |
| H | 1.9109292  | 1.6427755  | -5.0739138 | P  | -0.3117279 | -0.3320748 | 0.2917886  |
| H | -2.7107545 | 2.5763635  | -3.7035145 | O  | 1.1440882  | -0.4306996 | 0.7889876  |
| H | 1.4119218  | -1.4352437 | -7.3434131 | O  | -0.7836641 | 0.9348518  | -0.3992423 |
| H | -0.5809801 | -3.7193581 | -2.2473409 | C  | -1.8251490 | -6.4314803 | 4.0776036  |
| H | -3.5978673 | 0.0097815  | -2.2294551 | C  | -2.2927206 | -6.4804658 | 2.7380900  |
| H | 1.1708982  | -1.9831985 | -5.0838931 | H  | -0.9658135 | -5.1898346 | 5.6287400  |
| H | 3.9213601  | 2.9916244  | 0.2685765  | H  | -1.8122967 | -7.3462187 | 4.6894798  |
|   |            |            |            | H  | -2.6844213 | -5.3854102 | 0.9216738  |
|   |            |            |            | H  | -2.6269193 | -7.4378651 | 2.3101730  |
|   |            |            |            | C  | -6.1087451 | -4.0014023 | 0.9180255  |
|   |            |            |            | C  | -6.5958847 | -4.0416002 | -0.4151385 |
|   |            |            |            | H  | -4.4571489 | -3.5445573 | 2.2233746  |
|   |            |            |            | H  | -6.7659335 | -4.2979973 | 1.7497280  |
|   |            |            |            | H  | -7.6223971 | -4.3842649 | -0.6157163 |
|   |            |            |            | H  | -6.1567165 | -3.6182083 | -2.4927044 |
|   |            |            |            | C  | 1.5559120  | -0.6007344 | 3.8184145  |
|   |            |            |            | C  | 0.1382216  | -0.4892330 | 3.8382155  |
|   |            |            |            | C  | 2.3274998  | 0.5914608  | 3.7759195  |
|   |            |            |            | C  | -0.4758370 | 0.7938409  | 3.9155018  |
|   |            |            |            | C  | 0.3240838  | 1.9494184  | 3.8623852  |
|   |            |            |            | C  | 1.7269740  | 1.8832104  | 3.7866333  |
|   |            |            |            | H  | 3.4249469  | 0.5177527  | 3.8532665  |
|   |            |            |            | C  | -1.9791954 | 0.9296836  | 4.1280286  |
|   |            |            |            | H  | -0.1688883 | 2.9305518  | 3.8834073  |
|   |            |            |            | C  | -2.6459337 | 1.9620920  | 3.2100427  |
|   |            |            |            | H  | -2.3186919 | 2.9985686  | 3.4304761  |
|   |            |            |            | H  | -3.7464825 | 1.9328108  | 3.3423867  |
|   |            |            |            | H  | -2.4197737 | 1.7652075  | 2.1455421  |
|   |            |            |            | C  | -2.2482810 | 1.2306723  | 5.6173704  |
|   |            |            |            | H  | -2.4350852 | -0.0576577 | 3.9114701  |
|   |            |            |            | H  | -1.8092765 | 2.2069333  | 5.9119178  |

### int2-8-d

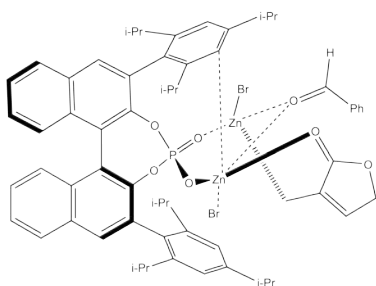

Energy(Hartree)= -11970.02382185

|    |           |           |            |
|----|-----------|-----------|------------|
| Zn | 2.4607689 | 0.8340375 | 1.3911763  |
| Br | 4.8101307 | 0.8059765 | 1.1633736  |
| C  | 1.8196415 | 7.0252648 | -0.3904254 |
| C  | 1.7412236 | 5.6548097 | -0.1162589 |
| C  | 2.9228301 | 4.8765160 | -0.0760247 |
| C  | 4.1799720 | 5.5047781 | -0.2879635 |
| C  | 4.2501329 | 6.8737354 | -0.5511427 |
| C  | 3.0660031 | 7.6359936 | -0.6101992 |
| H  | 0.8945150 | 7.6203107 | -0.4229412 |

|   |            |            |            |
|---|------------|------------|------------|
| H | -1.8134636 | 0.4519578  | 6.2765858  |
| H | -3.3394094 | 1.2778741  | 5.8116471  |
| C | 2.6090448  | 3.1287360  | 3.8288865  |
| C | 1.8725129  | 4.4185926  | 3.4461676  |
| H | 2.5940996  | 5.2479959  | 3.3066006  |
| H | 1.1653458  | 4.7313969  | 4.2420196  |
| H | 1.2914992  | 4.3049901  | 2.5103735  |
| C | 3.2710636  | 3.2607966  | 5.2159538  |
| H | 3.4326171  | 2.9605888  | 3.0959238  |
| H | 3.9525675  | 4.1354573  | 5.2399591  |
| H | 3.8620945  | 2.3611232  | 5.4789545  |
| H | 2.5014110  | 3.4042636  | 6.0026935  |
| C | 2.2695315  | -1.9484728 | 3.8745576  |
| C | 3.3337912  | -2.1492503 | 2.7867736  |
| H | 3.7459976  | -3.1767260 | 2.8510959  |
| H | 4.1861427  | -1.4473332 | 2.8830541  |
| H | 2.8990204  | -2.0252639 | 1.7748081  |
| C | 2.8551942  | -2.1617601 | 5.2848510  |
| H | 1.5036560  | -2.7307844 | 3.7137940  |
| H | 3.3139147  | -3.1684146 | 5.3665208  |
| H | 2.0767918  | -2.0722595 | 6.0700230  |
| H | 3.6439013  | -1.4134844 | 5.5103147  |
| H | 0.0586149  | 1.3116994  | -6.6921932 |
| H | 0.4296017  | -4.3454994 | -5.1116872 |
| H | -5.3568615 | 0.8560513  | -3.7535092 |
| C | 0.6405757  | 0.4183226  | -6.3737401 |
| H | 1.7983172  | -4.3490623 | -2.1846337 |
| H | 2.5828483  | 1.3903396  | -6.7098755 |
| H | -3.9433374 | 2.4497936  | -2.3762439 |
| C | -0.1456926 | -0.2427712 | -5.2474678 |
| C | -0.1627877 | -4.5478035 | -4.1947216 |
| C | 2.0142288  | 0.9139793  | -5.8838604 |
| H | 2.6264613  | 0.0767903  | -5.4877484 |
| C | 0.2573885  | -1.4745404 | -4.7060628 |
| C | -4.4349636 | 0.3800332  | -4.1475264 |
| H | -0.2079764 | -0.8487345 | -7.9584444 |
| C | -1.2866941 | 0.3700057  | -4.7044991 |
| C | 0.7816230  | -0.5022490 | -7.5984248 |
| H | 1.2885229  | 0.0248412  | -8.4332120 |
| H | -1.6129525 | 1.3377154  | -5.1201721 |
| C | 1.5083170  | -3.3871228 | -2.6561324 |
| H | 0.1530742  | -5.5368344 | -3.8019265 |
| H | -1.2282730 | -4.6204578 | -4.4945111 |
| C | -0.4409008 | -2.0961080 | -3.6584533 |
| C | -3.0250355 | 1.9862862  | -2.7902310 |
| C | -2.0270373 | -0.2087368 | -3.6553396 |
| H | -4.6666745 | -0.6801622 | -4.3734638 |
| H | -4.1820975 | 0.8744084  | -5.1089667 |
| C | 0.0489194  | -3.4460065 | -3.1396964 |
| C | -1.6009354 | -1.4631448 | -3.1359965 |
| C | -3.2755191 | 0.5108208  | -3.1407357 |
| H | 1.6507188  | -2.5684748 | -1.9259187 |
| H | -2.2386511 | 2.0798802  | -2.0198794 |
| H | 2.2096635  | -3.2064719 | -3.4975379 |
| H | 1.9035744  | 1.6583464  | -5.0712977 |
| H | -2.7234202 | 2.5855979  | -3.6742322 |
| H | 1.3855251  | -1.4027385 | -7.3610289 |
| H | -0.5744688 | -3.7182941 | -2.2640445 |
| H | -3.5871725 | 0.0100943  | -2.2016901 |
| H | 1.1576008  | -1.9687911 | -5.1041147 |
| H | 3.9382797  | 2.9685305  | 0.2508396  |

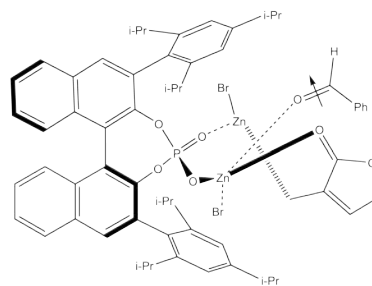

Energy(Hartree)= -11970.0392238

|    |            |            |            |
|----|------------|------------|------------|
| C  | -4.3843906 | -5.1977872 | -1.4840507 |
| C  | -0.4288246 | -4.6548492 | 0.0019149  |
| C  | -3.8835115 | -3.8935863 | -1.2959601 |
| C  | -2.2747579 | -6.1472547 | -0.7458130 |
| C  | -1.7685178 | -4.8411584 | -0.5507199 |
| C  | -3.5826523 | -6.3229289 | -1.2154934 |
| C  | -2.5764917 | -3.7130232 | -0.8371576 |
| O  | 0.0512540  | -3.5327170 | 0.2039454  |
| H  | -5.4140121 | -5.3371718 | -1.8482367 |
| H  | -1.6364434 | -7.0173130 | -0.5234595 |
| H  | -4.5065036 | -3.0088318 | -1.5007016 |
| H  | -3.9823826 | -7.3359912 | -1.3718834 |
| H  | -2.1601704 | -2.7037082 | -0.6924523 |
| Br | -4.5159880 | -0.1885948 | -1.0665492 |
| Zn | -3.1677289 | -0.1733479 | 0.8599553  |
| H  | -3.1071378 | -5.2361816 | 3.6849357  |
| H  | -2.7404883 | -0.2116771 | 3.3250144  |
| C  | -3.9425295 | -3.3708713 | 2.8734964  |
| C  | -3.0708264 | -4.5785047 | 2.7887987  |
| H  | -5.0362375 | -3.4243419 | 2.9564155  |
| C  | -3.1765635 | -2.2383390 | 2.8070461  |
| C  | -3.4750030 | -0.8055286 | 2.7460061  |
| C  | -1.7854331 | -2.7160148 | 2.6735385  |
| O  | -1.7252493 | -4.0617638 | 2.6734613  |
| O  | -0.7706740 | -2.0135149 | 2.5537280  |
| H  | -3.2646733 | -5.2112383 | 1.8932144  |
| H  | -4.5072002 | -0.5682582 | 3.0652444  |
| C  | 1.5455447  | 1.2246708  | -1.9533587 |
| C  | 2.0469278  | 2.4791077  | -1.5833532 |
| C  | 3.3432672  | 2.8626707  | -2.0971095 |
| C  | 4.0507704  | 4.0158727  | -1.6405571 |
| C  | 3.9770192  | 2.0285170  | -3.0904960 |
| C  | 5.2367167  | 2.4219551  | -3.6352575 |
| C  | 3.3647190  | 0.8017584  | -3.4747389 |
| H  | 3.8663190  | 0.1713098  | -4.2250546 |
| C  | 2.1903421  | 0.3499895  | -2.8842173 |
| C  | 0.1878359  | 3.6943906  | 1.5632367  |
| C  | 0.0924531  | 5.0574252  | 1.3049870  |
| H  | -0.3218978 | 5.7257876  | 2.0760103  |
| C  | 0.4644404  | 5.6099726  | 0.0454905  |
| C  | 0.2552459  | 6.9927599  | -0.2421129 |
| C  | 1.0211933  | 4.7528825  | -0.9746104 |
| C  | 1.2710798  | 5.3146858  | -2.2628693 |
| C  | 1.2806734  | 3.3664743  | -0.6612897 |
| C  | 0.7993710  | 2.8770352  | 0.5595108  |
| O  | 0.3217165  | 0.8055517  | -1.4474898 |
| O  | 0.9966971  | 1.5479138  | 0.8873831  |
| O  | 0.2099255  | 0.3255725  | 0.1191408  |
| P  | 1.0951081  | -0.8921740 | 0.4027261  |
| O  | -1.2781709 | 0.2782863  | 0.4194299  |
| C  | 5.8785693  | 3.5693163  | -3.1943113 |
| C  | 5.2857382  | 4.3596580  | -2.1739059 |
| H  | 5.6991785  | 1.7810065  | -4.4024561 |
| H  | 6.8531816  | 3.8573570  | -3.6170292 |
| H  | 3.6136540  | 4.6332424  | -0.8440806 |
| H  | 5.8118304  | 5.2498575  | -1.7963988 |

## 7.2.2.2 to 15r-mi TS1-8-r; COSMO

|   |            |            |            |
|---|------------|------------|------------|
| C | 1.0338666  | 6.6586183  | -2.5183069 |
| C | 0.5391001  | 7.5122971  | -1.4963202 |
| H | 1.6473977  | 4.6652915  | -3.0654424 |
| H | 1.2263006  | 7.0636819  | -3.5235878 |
| H | 0.3648029  | 8.5784438  | -1.7072287 |
| H | -0.1568088 | 7.6370260  | 0.5506236  |
| C | 2.3634644  | -2.1630094 | -2.7006219 |
| C | 1.6379162  | -1.0165659 | -3.1419910 |
| C | 1.8042882  | -3.4347619 | -2.9127139 |
| C | 0.3833166  | -1.1805089 | -3.7883181 |
| C | -0.1241347 | -2.4801753 | -3.9833933 |
| C | 0.5674782  | -3.6247104 | -3.5559768 |
| H | 2.3598809  | -4.3211351 | -2.5632556 |
| C | -0.4066483 | 0.0038232  | -4.3414353 |
| H | -1.0916428 | -2.5902275 | -4.4944959 |
| C | -1.8422205 | 0.0562952  | -3.7951366 |
| H | -2.4424472 | -0.8194069 | -4.1193356 |
| H | -2.3662421 | 0.9642222  | -4.1589557 |
| H | -1.8561830 | 0.0815206  | -2.6892148 |
| C | -0.3812862 | -0.0017354 | -5.8822468 |
| H | 0.1032706  | 0.9333341  | -4.0173306 |
| H | -0.8817882 | -0.9050154 | -6.2903260 |
| H | 0.6583866  | 0.0097102  | -6.2687850 |
| H | -0.9092746 | 0.8868288  | -6.2867176 |
| C | 0.0644728  | -5.0446012 | -3.8077011 |
| C | -1.4153848 | -5.1321895 | -4.1971824 |
| H | -1.7426334 | -6.1906231 | -4.2382925 |
| H | -1.5961594 | -4.6931546 | -5.2006631 |
| H | -2.0669742 | -4.6029186 | -3.4747896 |
| C | 0.9434600  | -5.7484151 | -4.8619840 |
| H | 0.1935596  | -5.5994540 | -2.8488164 |
| H | 0.6270200  | -6.8027423 | -5.0042701 |
| H | 2.0131626  | -5.7472648 | -4.5720912 |
| H | 0.8609956  | -5.2307115 | -5.8406313 |
| C | 3.7402696  | -2.0735258 | -2.0400742 |
| C | 3.7960083  | -2.7651623 | -0.6700845 |
| H | 4.8188099  | -2.7129423 | -0.2441956 |
| H | 3.5121867  | -3.8366270 | -0.7185018 |
| H | 3.1194919  | -2.2650484 | 0.0460252  |
| C | 4.8290500  | -2.6166677 | -2.9860672 |
| H | 3.9630024  | -1.0033528 | -1.8610093 |
| H | 5.8371223  | -2.4893157 | -2.5397519 |
| H | 4.8176094  | -2.0943658 | -3.9646861 |
| H | 4.6834518  | -3.6989642 | -3.1874231 |
| H | -3.1674441 | 0.8674688  | 6.0440908  |
| H | 2.4058634  | 2.8296061  | 5.7040398  |
| H | -4.3748768 | 5.2515164  | 2.1472595  |
| C | -2.0628111 | 0.8599631  | 6.1775966  |
| H | 3.7367444  | 1.0581247  | 3.4225598  |
| H | -2.0811692 | -1.1523778 | 7.0489049  |
| H | -4.2161174 | 3.3016004  | 0.4986943  |
| C | -1.4711087 | 1.6271413  | 5.0013230  |
| C | 2.6120805  | 3.2635392  | 4.7031034  |
| C | -1.6061455 | -0.6096752 | 6.2058862  |
| H | -0.5070627 | -0.6920520 | 6.3343606  |
| C | -0.0835955 | 1.6686223  | 4.7827202  |
| C | -3.7515827 | 4.6680915  | 2.8556243  |
| H | -2.1054731 | 2.6148047  | 7.5051341  |
| C | -2.2924267 | 2.3396050  | 4.1123389  |
| C | -1.7497662 | 1.5646806  | 7.5111674  |
| H | -2.2338915 | 1.0400725  | 8.3610172  |
| H | -3.3822621 | 2.3219433  | 4.2767620  |
| C | 2.6384842  | 0.9886855  | 3.5628444  |
| H | 3.7133101  | 3.3424075  | 4.5901935  |
| H | 2.1897529  | 4.2890409  | 4.6881025  |
| C | 0.4862281  | 2.3597788  | 3.7006654  |
| C | -3.4981483 | 2.7849971  | 1.1678282  |
| C | -1.7776745 | 3.0588380  | 3.0153485  |
| H | -3.2193780 | 5.3831285  | 3.5155792  |
| H | -4.4435907 | 4.0763996  | 3.4902817  |
| C | 2.0098942  | 2.3936312  | 3.5819346  |

|    |            |            |           |
|----|------------|------------|-----------|
| C  | -0.3692528 | 3.0499675  | 2.7929174 |
| C  | -2.7630640 | 3.7747616  | 2.0874413 |
| H  | 2.2331647  | 0.3756765  | 2.7354103 |
| H  | -2.7757290 | 2.2531079  | 0.5151852 |
| H  | 2.4636837  | 0.4401411  | 4.5114135 |
| H  | -1.8685562 | -1.1322240 | 5.2651621 |
| H  | -4.0843716 | 2.0484205  | 1.7613815 |
| H  | -0.6563514 | 1.5812940  | 7.7035541 |
| H  | 2.2684099  | 2.8848753  | 2.6224396 |
| H  | -2.1818063 | 4.4386986  | 1.4202401 |
| Zn | 1.0188129  | -2.3974104 | 1.6383688 |
| Br | 2.6588509  | -3.3197017 | 2.9738538 |
| H  | 0.5849648  | 1.1398216  | 5.4801885 |
| H  | 0.1528751  | -5.5773152 | 0.2620294 |

### TS1-8-r

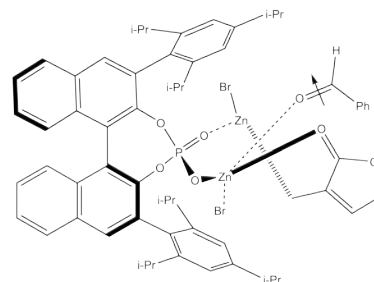

Energy(Hartree)= -11970.02542639  
number of imaginary frequencies: 1

|    |            |            |            |
|----|------------|------------|------------|
| C  | -4.3936782 | -5.1900026 | -1.4854767 |
| C  | -0.4334898 | -4.6389922 | -0.0104986 |
| C  | -3.8941648 | -3.8855802 | -1.3005979 |
| C  | -2.2822249 | -6.1363203 | -0.7497795 |
| C  | -1.7762276 | -4.8300195 | -0.5584604 |
| C  | -3.5905960 | -6.3141882 | -1.2165634 |
| C  | -2.5856030 | -3.7038555 | -0.8453127 |
| O  | 0.0484761  | -3.5187304 | 0.1824624  |
| H  | -5.4237551 | -5.3312030 | -1.8479517 |
| H  | -1.6418554 | -7.0055168 | -0.5288040 |
| H  | -4.5150341 | -2.9980447 | -1.5020077 |
| H  | -3.9893453 | -7.3279294 | -1.3717348 |
| H  | -2.1717229 | -2.6929492 | -0.7047429 |
| Br | -4.5124809 | -0.2165213 | -1.0599577 |
| Zn | -3.1641921 | -0.1779195 | 0.8543580  |
| H  | -3.1158747 | -5.2360675 | 3.6584770  |
| H  | -2.7086517 | -0.2054775 | 3.3169076  |
| C  | -3.9429711 | -3.3561911 | 2.8675888  |
| C  | -3.0793290 | -4.5696478 | 2.7679286  |
| H  | -5.0366647 | -3.4001225 | 2.9537840  |
| C  | -3.1694733 | -2.2281781 | 2.8068999  |
| C  | -3.4567140 | -0.7955297 | 2.7519500  |
| C  | -1.7802187 | -2.7148282 | 2.6637418  |
| O  | -1.7320846 | -4.0636348 | 2.6517233  |
| O  | -0.7624306 | -2.0215143 | 2.5432733  |
| H  | -3.2812496 | -5.1924368 | 1.8665260  |
| H  | -4.4834099 | -0.5479713 | 3.0802705  |
| C  | 1.5457139  | 1.2225461  | -1.9512080 |
| C  | 2.0454038  | 2.4782994  | -1.5834407 |
| C  | 3.3387709  | 2.8647890  | -2.1023771 |
| C  | 4.0449362  | 4.0199099  | -1.6494956 |
| C  | 3.9709421  | 2.0319769  | -3.0975921 |
| C  | 5.2269450  | 2.4288983  | -3.6469831 |
| C  | 3.3605866  | 0.8034931  | -3.4781985 |
| H  | 3.8605215  | 0.1727786  | -4.2293896 |
| C  | 2.1898026  | 0.3489318  | -2.8834228 |
| C  | 0.1907485  | 3.6895156  | 1.5673569  |

|   |            |            |            |    |            |            |           |
|---|------------|------------|------------|----|------------|------------|-----------|
| C | 0.0949226  | 5.0525583  | 1.3103216  | C  | 2.6110208  | 3.2509853  | 4.7086523 |
| H | -0.3191768 | 5.7188070  | 2.0833756  | C  | -1.6254878 | -0.6012935 | 6.2196617 |
| C | 0.4639313  | 5.6066428  | 0.0510361  | H  | -0.5266506 | -0.6933489 | 6.3425645 |
| C | 0.2538253  | 6.9889740  | -0.2356721 | C  | -0.0885298 | 1.6658709  | 4.7872823 |
| C | 1.0186362  | 4.7504086  | -0.9706345 | C  | -3.7467041 | 4.6708899  | 2.8477093 |
| C | 1.2652382  | 5.3132341  | -2.2587878 | H  | -2.0934820 | 2.6324609  | 7.5072867 |
| C | 1.2802954  | 3.3641034  | -0.6589282 | C  | -2.2941408 | 2.3433289  | 4.1154865 |
| C | 0.8016956  | 2.8732949  | 0.5624677  | C  | -1.7474253 | 1.5793768  | 7.5170361 |
| O | 0.3247140  | 0.7999338  | -1.4423584 | H  | -2.2328126 | 1.0628583  | 8.3710682 |
| O | 1.0011844  | 1.5452210  | 0.8905492  | H  | -3.3840205 | 2.3303243  | 4.2801707 |
| P | 0.2172697  | 0.3199304  | 0.1243374  | C  | 2.6332519  | 0.9755250  | 3.5687772 |
| O | 1.1068414  | -0.8940995 | 0.4082691  | H  | 3.7125164  | 3.3271153  | 4.5974402 |
| O | -1.2702823 | 0.2674265  | 0.4273143  | H  | 2.1910248  | 4.2772459  | 4.6933227 |
| C | 5.8671430  | 3.5779500  | -3.2098517 | C  | 0.4843726  | 2.3530966  | 3.7045955 |
| C | 5.2762322  | 4.3668310  | -2.1880916 | C  | -3.4959574 | 2.7802423  | 1.1676154 |
| H | 5.6882158  | 1.7882460  | -4.4151107 | C  | -1.7769437 | 3.0575459  | 3.0167814 |
| H | 6.8392345  | 3.8682406  | -3.6366625 | H  | -3.2139759 | 5.3865085  | 3.5063980 |
| H | 3.6086065  | 4.6359585  | -0.8517320 | H  | -4.4414381 | 4.0846276  | 3.4844023 |
| H | 5.8009792  | 5.2588533  | -1.8132087 | C  | 2.0081933  | 2.3819826  | 3.5872617 |
| C | 1.0270556  | 6.6567954  | -2.5126522 | C  | -0.3684487 | 3.0447108  | 2.7957479 |
| C | 0.5344125  | 7.5094126  | -1.4895930 | C  | -2.7598449 | 3.7715998  | 2.0845926 |
| H | 1.6401670  | 4.6637270  | -3.0617297 | H  | 2.2285495  | 0.3629818  | 2.7408984 |
| H | 1.2172370  | 7.0623360  | -3.5180916 | H  | -2.7742157 | 2.2444163  | 0.5175076 |
| H | 0.3591596  | 8.5755846  | -1.6992571 | H  | 2.4581877  | 0.4263668  | 4.5168724 |
| H | -0.1567096 | 7.6325045  | 0.5584508  | H  | -1.8976856 | -1.1258986 | 5.2829882 |
| C | 2.3683568  | -2.1631607 | -2.6979935 | H  | -4.0848181 | 2.0465945  | 1.7619682 |
| C | 1.6394384  | -1.0188691 | -3.1386343 | H  | -0.6535642 | 1.5884992  | 7.7063100 |
| C | 1.8104727  | -3.4357419 | -2.9073757 | H  | 2.2686688  | 2.8724298  | 2.6279348 |
| C | 0.3838866  | -1.1851221 | -3.7821359 | H  | -2.1759489 | 4.4312437  | 1.4154006 |
| C | -0.1211454 | -2.4857310 | -3.9756761 | Zn | 1.0421217  | -2.4058389 | 1.6348620 |
| C | 0.5732947  | -3.6282712 | -3.5485459 | Br | 2.6517856  | -3.3839757 | 2.9489091 |
| H | 2.3693761  | -4.3204088 | -2.5585124 | H  | 0.5783217  | 1.1354526  | 5.4851147 |
| C | -0.4088767 | -0.0027506 | -4.3351942 | H  | 0.1491828  | -5.5611867 | 0.2546998 |
| H | -1.0889936 | -2.5972175 | -4.4856647 |    |            |            |           |
| C | -1.8448750 | 0.0472845  | -3.7902581 |    |            |            |           |
| H | -2.4450083 | -0.8281819 | -4.1152091 |    |            |            |           |
| H | -2.3704973 | 0.9543938  | -4.1528567 |    |            |            |           |
| H | -1.8610755 | 0.0731146  | -2.6844804 |    |            |            |           |
| C | -0.3812164 | -0.0087094 | -5.8758698 |    |            |            |           |
| H | 0.0990290  | 0.9277222  | -4.0108108 |    |            |            |           |
| H | -0.8787070 | -0.9131367 | -6.2848105 |    |            |            |           |
| H | 0.6586707  | 0.0045855  | -6.2612554 |    |            |            |           |
| H | -0.9110512 | 0.8780868  | -6.2814966 |    |            |            |           |
| C | 0.0741023  | -5.0493828 | -3.8019810 |    |            |            |           |
| C | -1.4051493 | -5.1409702 | -4.1930382 |    |            |            |           |
| H | -1.7306759 | -6.1999468 | -4.2353162 |    |            |            |           |
| H | -1.5849262 | -4.7030541 | -5.1970162 |    |            |            |           |
| H | -2.0599503 | -4.6120295 | -3.4734333 |    |            |            |           |
| C | 0.9552803  | -5.7498476 | -4.8564243 |    |            |            |           |
| H | 0.2034695  | -5.6057441 | -2.8433982 |    |            |            |           |
| H | 0.6426131  | -6.8049552 | -5.0015218 |    |            |            |           |
| H | 2.0248833  | -5.7449540 | -4.5670082 |    |            |            |           |
| H | 0.8723597  | -5.2301611 | -5.8336771 |    |            |            |           |
| C | 3.7477380  | -2.0705936 | -2.0432458 |    |            |            |           |
| C | 3.8119004  | -2.7584755 | -0.6720155 |    |            |            |           |
| H | 4.8363893  | -2.7049691 | -0.2509880 |    |            |            |           |
| H | 3.5296792  | -3.8305920 | -0.7140660 |    |            |            |           |
| H | 3.1408109  | -2.2570204 | 0.0480183  |    |            |            |           |
| C | 4.8320992  | -2.6139625 | -2.9940955 |    |            |            |           |
| H | 3.9695779  | -0.9996943 | -1.8676902 |    |            |            |           |
| H | 5.8424586  | -2.4848687 | -2.5537179 |    |            |            |           |
| H | 4.8146592  | -2.0945815 | -3.9740925 |    |            |            |           |
| H | 4.6875412  | -3.6967016 | -3.1933373 |    |            |            |           |
| H | -3.1748424 | 0.8875432  | 6.0569394  |    |            |            |           |
| H | 2.4029895  | 2.8186677  | 5.7097949  |    |            |            |           |
| H | -4.3683226 | 5.2533652  | 2.1371348  |    |            |            |           |
| C | -2.0697350 | 0.8719905  | 6.1872964  |    |            |            |           |
| H | 3.7314991  | 1.0413995  | 3.4285655  |    |            |            |           |
| H | -2.1001577 | -1.1368042 | 7.0675120  |    |            |            |           |
| H | -4.2118352 | 3.2942251  | 0.4943960  |    |            |            |           |
| C | -1.4757810 | 1.6306973  | 5.0065983  |    |            |            |           |

### TS2-8-r; COSMO

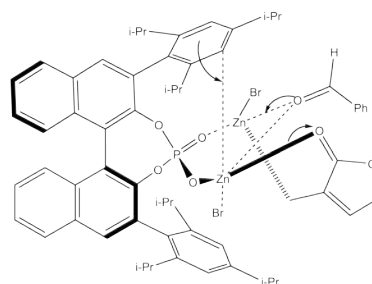

Energy(Hartree) = -11970.03412996

|    |            |            |            |
|----|------------|------------|------------|
| C  | -7.7176203 | -2.6651764 | -1.0575083 |
| C  | -3.4610075 | -2.7413481 | -1.0361145 |
| C  | -7.0181493 | -1.4443977 | -1.0568179 |
| C  | -5.6213445 | -3.8860178 | -1.0605287 |
| C  | -4.9074348 | -2.6570504 | -1.0483552 |
| C  | -7.0175088 | -3.8883410 | -1.0663285 |
| C  | -5.6196249 | -1.4328494 | -1.0601078 |
| O  | -2.6470948 | -1.7689052 | -1.1040792 |
| H  | -8.8186264 | -2.6662623 | -1.0588733 |
| H  | -5.0625003 | -4.8355290 | -1.0620766 |
| H  | -7.5665338 | -0.4904197 | -1.0618312 |
| H  | -7.5684519 | -4.8405672 | -1.0778270 |
| H  | -5.0803702 | -0.4728867 | -1.0846467 |
| Br | -3.9735389 | 1.8099105  | -1.0859951 |
| Zn | -2.8404687 | 0.1915335  | 0.2210086  |
| H  | -3.1201165 | -5.1612497 | 2.9057512  |
| H  | -2.4761667 | -0.3123742 | 2.5637590  |
| C  | -3.8305652 | -3.3388035 | 1.9414096  |
| C  | -3.0180164 | -4.5952608 | 1.9514307  |
| H  | -4.9242847 | -3.3266079 | 2.0447591  |
| C  | -2.9985218 | -2.2528735 | 1.9007233  |
| C  | -3.2406811 | -0.8194504 | 1.9362930  |

|   |            |            |            |    |            |            |            |
|---|------------|------------|------------|----|------------|------------|------------|
| C | -1.6191490 | -2.8047291 | 1.7027742  | H  | 1.9045915  | -3.9465242 | -2.7959890 |
| O | -1.6584309 | -4.1691454 | 1.8045776  | H  | 2.3038285  | -2.7416336 | -1.5265983 |
| O | -0.5912253 | -2.2079905 | 1.4323002  | C  | 3.1318981  | -2.5314296 | -4.9320302 |
| H | -3.2516540 | -5.3035618 | 1.1241080  | H  | 3.4065902  | -1.2805001 | -3.2068400 |
| H | -4.2612136 | -0.5632133 | 2.2781422  | H  | 4.1232144  | -3.0206709 | -4.8374053 |
| C | 2.1957059  | 1.5126148  | -1.8116111 | H  | 3.2209110  | -1.7116097 | -5.6740052 |
| C | 3.2245140  | 2.0121829  | -1.0095507 | H  | 2.4233404  | -3.2798920 | -5.3451951 |
| C | 4.5695997  | 1.9600835  | -1.5346024 | H  | -2.6686617 | -0.6191510 | 6.0157920  |
| C | 5.7207050  | 2.2888873  | -0.7577007 | H  | 3.1886269  | -1.3116925 | 5.5451226  |
| C | 4.7704425  | 1.5238520  | -2.8979048 | H  | -1.3004485 | 5.0974039  | 4.1262826  |
| C | 6.0904023  | 1.5198466  | -3.4412448 | C  | -1.6863485 | -1.1397770 | 5.9739897  |
| C | 3.6682784  | 1.0271534  | -3.6556642 | H  | 3.6400821  | -2.2911924 | 2.5046400  |
| H | 3.8545399  | 0.6445464  | -4.6711877 | H  | -2.6093859 | -3.1200334 | 6.1472661  |
| C | 2.3920290  | 0.9458960  | -3.1141873 | H  | -2.6038165 | 3.9967480  | 2.2446810  |
| C | 1.8164720  | 2.1112814  | 2.5722104  | C  | -0.7940040 | -0.3240755 | 5.0455919  |
| C | 2.3483158  | 3.3082881  | 3.0384588  | C  | 3.6097386  | -0.6304655 | 4.7760343  |
| H | 2.1614292  | 3.6086052  | 4.0808779  | C  | -1.9396241 | -2.5661635 | 5.4571245  |
| C | 3.0776168  | 4.1894624  | 2.1905297  | H  | -0.9965255 | -3.1451098 | 5.3735192  |
| C | 3.5290921  | 5.4589720  | 2.6628297  | C  | 0.4760909  | -0.7861341 | 4.6604569  |
| C | 3.3225280  | 3.8182390  | 0.8170168  | C  | -0.9662587 | 4.0980249  | 4.4744850  |
| C | 3.9429575  | 4.7787788  | -0.0383484 | H  | -0.9626402 | -0.1320505 | 7.7917867  |
| C | 2.8981249  | 2.5172523  | 0.3555615  | C  | -1.1985812 | 0.9380018  | 4.5802835  |
| C | 2.1257054  | 1.7348682  | 1.2282004  | C  | -1.1096848 | -1.1598574 | 7.4027041  |
| O | 0.8949294  | 1.5654946  | -1.3310340 | H  | -1.7860582 | -1.6997391 | 8.0978609  |
| O | 1.6616684  | 0.4898903  | 0.8167607  | H  | -2.1969041 | 1.3087132  | 4.8657563  |
| P | 0.4333071  | 0.3951021  | -0.2646094 | C  | 2.6325475  | -1.9602754 | 2.8320407  |
| O | 0.6054772  | -0.9931630 | -0.9045720 | H  | 4.6272568  | -0.9953598 | 4.5238808  |
| O | -0.9231017 | 0.8272286  | 0.2604119  | H  | 3.7088876  | 0.3742763  | 5.2358128  |
| C | 7.1828505  | 1.8857591  | -2.6687488 | C  | 1.3385669  | -0.0243153 | 3.8539476  |
| C | 6.9943106  | 2.2536933  | -1.3101615 | C  | -2.2730541 | 2.9985884  | 2.5977755  |
| H | 6.2267056  | 1.1985365  | -4.4859638 | C  | -0.3785994 | 1.7419885  | 3.7637360  |
| H | 8.1957272  | 1.8716578  | -3.0992522 | H  | 0.0237079  | 4.2173564  | 4.9597488  |
| H | 5.5923113  | 2.5673708  | 0.2971744  | H  | -1.6786871 | 3.7563136  | 5.2546111  |
| H | 7.8648179  | 2.5084217  | -0.6865170 | C  | 2.7185150  | -0.5866024 | 3.5202844  |
| C | 4.3515218  | 6.0139714  | 0.4463164  | C  | 0.9150018  | 1.2606161  | 3.4126520  |
| C | 4.1612503  | 6.3536698  | 1.8125784  | C  | -0.9092836 | 3.1005581  | 3.3016448  |
| H | 4.0867695  | 4.5367466  | -1.1003568 | H  | 1.9643736  | -1.9253817 | 1.9505885  |
| H | 4.8206324  | 6.7382300  | -0.2371268 | H  | -2.2094326 | 2.3403162  | 1.7117047  |
| H | 4.4975687  | 7.3322677  | 2.1877234  | H  | 2.2370437  | -2.7368743 | 3.5198740  |
| H | 3.3464517  | 5.7211821  | 3.7168670  | H  | -2.4150895 | -2.5525882 | 4.4570742  |
| C | 1.3352933  | -1.2561588 | -3.7337300 | H  | -3.0651532 | 2.6061261  | 3.2688448  |
| C | 1.2521889  | 0.1647803  | -3.6881951 | H  | -0.1242164 | -1.6709377 | 7.4245243  |
| C | 0.1476480  | -1.9952949 | -3.9589750 | H  | 3.2057557  | 0.1080550  | 2.8074412  |
| C | 0.0151023  | -0.8136709 | -3.9628907 | H  | -0.1965190 | 3.5037623  | 2.5546326  |
| C | -1.1401504 | 0.0403494  | -4.1732140 | Zn | -0.6014315 | -2.3401132 | -1.5009802 |
| C | -1.1085850 | -1.3663377 | -4.1647489 | Br | -0.7011051 | -4.6787811 | -1.6153203 |
| H | 0.2132152  | -3.0915128 | -4.0554836 | H  | 0.8153844  | -1.7755927 | 5.0053272  |
| C | -0.0561984 | 2.3303611  | -4.1056160 | H  | -3.0291991 | -3.7695157 | -1.0455061 |
| H | -2.0920043 | 0.5580381  | -4.3530044 |    |            |            |            |
| C | -1.2466413 | 2.9670714  | -3.3773492 |    |            |            |            |
| H | -2.2184853 | 2.6789512  | -3.8279490 |    |            |            |            |
| H | -1.1780356 | 4.0728599  | -3.4292819 |    |            |            |            |
| H | -1.2766183 | 2.6691430  | -2.3124156 |    |            |            |            |
| C | -0.0426431 | 2.6968601  | -5.6042104 |    |            |            |            |
| H | 0.8704140  | 2.7499189  | -3.6636677 |    |            |            |            |
| H | -0.9421296 | 2.2976285  | -6.1183802 |    |            |            |            |
| H | 0.8503259  | 2.2833366  | -6.1157994 |    |            |            |            |
| H | -0.0370132 | 3.7986524  | -5.7353532 |    |            |            |            |
| C | -2.3408249 | -2.2125644 | -4.4774791 |    |            |            |            |
| C | -3.6663710 | -1.4589574 | -4.3094967 |    |            |            |            |
| H | -4.5202682 | -2.1635360 | -4.3624225 |    |            |            |            |
| H | -3.8099094 | -0.7096359 | -5.1155110 |    |            |            |            |
| H | -3.7207477 | -0.9218851 | -3.3423603 |    |            |            |            |
| C | -2.2276002 | -2.8168067 | -5.8920471 |    |            |            |            |
| H | -2.3288459 | -3.0690574 | -3.7632265 |    |            |            |            |
| H | -3.0954742 | -3.4737129 | -6.1060907 |    |            |            |            |
| H | -1.3054801 | -3.4201401 | -6.0088589 |    |            |            |            |
| H | -2.2078936 | -2.0131975 | -6.6575222 |    |            |            |            |
| C | 2.6529794  | -2.0083864 | -3.5631000 |    |            |            |            |
| C | 2.6053935  | -3.1334019 | -2.5185640 |    |            |            |            |
| H | 3.6106252  | -3.5894228 | -2.4101345 |    |            |            |            |

### TS2-8-r

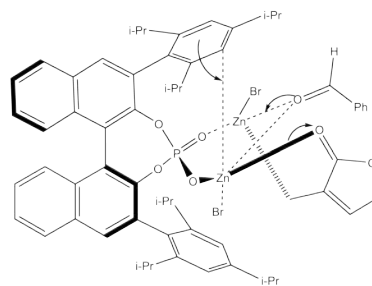

Energy(Hartree)= -11970.02236276  
number of imaginary frequencies: 1

|   |            |            |            |
|---|------------|------------|------------|
| C | -7.7152105 | -2.7033249 | -1.0509894 |
| C | -3.4557249 | -2.7596844 | -1.0288735 |
| C | -7.0211030 | -1.4804693 | -1.0433956 |
| C | -5.6130987 | -3.9132254 | -1.0599707 |
| C | -4.9046305 | -2.6816651 | -1.0401440 |
| C | -7.0090581 | -3.9227643 | -1.0663804 |
| C | -5.6223238 | -1.4612885 | -1.0458509 |

|    |            |            |            |    |            |            |            |
|----|------------|------------|------------|----|------------|------------|------------|
| O  | -2.6474214 | -1.7845497 | -1.0949062 | H  | 0.8442244  | 2.2983039  | -6.1096520 |
| H  | -8.8162716 | -2.7099000 | -1.0531288 | H  | -0.0373444 | 3.8145998  | -5.7203482 |
| H  | -5.0482559 | -4.8593036 | -1.0679871 | C  | -2.3484506 | -2.1958278 | -4.4694380 |
| H  | -7.5718019 | -0.5277906 | -1.0440548 | C  | -3.6713994 | -1.4401304 | -4.2903583 |
| H  | -7.5554230 | -4.8776411 | -1.0843241 | H  | -4.5278609 | -2.1420649 | -4.3395470 |
| H  | -5.0887458 | -0.4971298 | -1.0661976 | H  | -3.8194474 | -0.6887363 | -5.0935819 |
| Br | -3.9816062 | 1.7622657  | -1.1273276 | H  | -3.7187767 | -0.9032608 | -3.3227188 |
| Zn | -2.8371360 | 0.1885839  | 0.2088259  | C  | -2.2463311 | -2.7974668 | -5.8857754 |
| H  | -3.0900252 | -5.1570691 | 2.9099725  | H  | -2.3319031 | -3.0539734 | -3.7571583 |
| H  | -2.4734573 | -0.3055676 | 2.5519070  | H  | -3.1164489 | -3.4526002 | -6.0964234 |
| C  | -3.8143738 | -3.3423880 | 1.9378147  | H  | -1.3261595 | -3.4019724 | -6.0104670 |
| C  | -2.9900478 | -4.5927190 | 1.9537561  | H  | -2.2298546 | -1.9928010 | -6.6501026 |
| H  | -4.9086194 | -3.3368464 | 2.0359744  | C  | 2.6487339  | -2.0063663 | -3.5765798 |
| C  | -2.9900358 | -2.2499711 | 1.8992302  | C  | 2.6015570  | -3.1336268 | -2.5344200 |
| C  | -3.2378466 | -0.8196191 | 1.9300729  | H  | 3.6057786  | -3.5925994 | -2.4294892 |
| C  | -1.6052586 | -2.7943019 | 1.7060390  | H  | 1.8981382  | -3.9452387 | -2.8095029 |
| O  | -1.6355394 | -4.1582695 | 1.8106567  | H  | 2.3055038  | -2.7436303 | -1.5402981 |
| O  | -0.5830033 | -2.1896482 | 1.4359403  | C  | 3.1223177  | -2.5271468 | -4.9480991 |
| H  | -3.2143898 | -5.3055607 | 1.1271227  | H  | 3.4050861  | -1.2809628 | -3.2208606 |
| H  | -4.2591225 | -0.5632548 | 2.2690240  | H  | 4.1124550  | -3.0197812 | -4.8587673 |
| C  | 2.2009959  | 1.5091357  | -1.8110757 | H  | 3.2105578  | -1.7062287 | -5.6889306 |
| C  | 3.2310875  | 2.0058226  | -1.0088003 | H  | 2.4108474  | -3.2725276 | -5.3616064 |
| C  | 4.5754226  | 1.9536306  | -1.5354594 | H  | -2.6826489 | -0.6045724 | 6.0068927  |
| C  | 5.7272451  | 2.2790607  | -0.7586943 | H  | 3.1711516  | -1.3082387 | 5.5584544  |
| C  | 4.7747931  | 1.5216053  | -2.9001171 | H  | -1.3009571 | 5.1021134  | 4.1043803  |
| C  | 6.0941530  | 1.5184519  | -3.4436476 | C  | -1.7008255 | -1.1268169 | 5.9701613  |
| C  | 3.6712393  | 1.0291147  | -3.6581445 | H  | 3.6398325  | -2.2952582 | 2.5219288  |
| H  | 3.8552699  | 0.6494727  | -4.6752454 | H  | -2.6281797 | -3.1045788 | 6.1520807  |
| C  | 2.3955347  | 0.9470414  | -3.1160436 | H  | -2.5983040 | 3.9989298  | 2.2183281  |
| C  | 1.8176854  | 2.1073524  | 2.5706589  | C  | -0.8053971 | -0.3169078 | 5.0396267  |
| C  | 2.3505957  | 3.3034522  | 3.0371662  | C  | 3.5962756  | -0.6292852 | 4.7897307  |
| H  | 2.1599321  | 3.6039407  | 4.0788284  | C  | -1.9559715 | -2.5553754 | 5.4605046  |
| C  | 3.0844514  | 4.1824539  | 2.1914762  | H  | -1.0141338 | -3.1369481 | 5.3819999  |
| C  | 3.5382698  | 5.4505062  | 2.6639155  | C  | 0.4645099  | -0.7825400 | 4.6593148  |
| C  | 3.3318674  | 3.8101386  | 0.8189273  | C  | -0.9698251 | 4.1029267  | 4.4557649  |
| C  | 3.9569360  | 4.7688297  | -0.0346773 | H  | -0.9787822 | -0.1097923 | 7.7827500  |
| C  | 2.9056323  | 2.5100759  | 0.3567503  | C  | -1.2062102 | 0.9442655  | 4.5695030  |
| C  | 2.1302192  | 1.7292363  | 1.2280047  | C  | -1.1273332 | -1.1395044 | 7.4000412  |
| O  | 0.9012103  | 1.5611027  | -1.3307560 | H  | -1.8050357 | -1.6743417 | 8.0977922  |
| O  | 1.6647026  | 0.4850909  | 0.8168251  | H  | -2.2045077 | 1.3179563  | 4.8511507  |
| P  | 0.4373769  | 0.3912296  | -0.2657287 | C  | 2.6307171  | -1.9637223 | 2.8430779  |
| O  | 0.6105431  | -0.9981337 | -0.9045357 | H  | 4.6150689  | -0.9951488 | 4.5446591  |
| O  | -0.9202612 | 0.8235693  | 0.2557758  | C  | 3.6926330  | 0.3762496  | 5.2479132  |
| C  | 7.1872160  | 1.8809835  | -2.6713903 | H  | 1.3312367  | -0.0245537 | 3.8541559  |
| C  | 6.9999552  | 2.2447568  | -1.3121191 | C  | -2.2703518 | 3.0017457  | 2.5760263  |
| H  | 6.2294068  | 1.2001608  | -4.4894430 | C  | -0.3825247 | 1.7446374  | 3.7536279  |
| H  | 8.1996281  | 1.8672805  | -3.1028709 | H  | 0.0178499  | 4.2216944  | 4.9455743  |
| H  | 5.5985822  | 2.5545442  | 0.2968389  | H  | -1.6854708 | 3.7645319  | 5.2342259  |
| H  | 7.8709566  | 2.4969869  | -0.6882518 | C  | 2.7123858  | -0.5886801 | 3.5288268  |
| C  | 4.3678868  | 6.0024393  | 0.4507223  | C  | 0.9113176  | 1.2599084  | 3.4088060  |
| C  | 4.1751805  | 6.3429746  | 1.8157827  | C  | -0.9095117 | 3.1027007  | 3.2855873  |
| H  | 4.1023314  | 4.5255097  | -1.0960369 | H  | 1.9685942  | -1.9322246 | 1.9571869  |
| H  | 4.8408589  | 6.7249717  | -0.2317988 | H  | -2.2046867 | 2.3423625  | 1.6911125  |
| H  | 4.5132209  | 7.3205922  | 2.1917696  | H  | 2.2318399  | -2.7400753 | 3.5290766  |
| H  | 3.3530422  | 5.7134876  | 3.7172915  | H  | -2.4292143 | -2.5460660 | 4.4594273  |
| C  | 1.3324746  | -1.2500940 | -3.7418959 | H  | -3.0667139 | 2.6128640  | 3.2441347  |
| C  | 1.2529751  | 0.1708433  | -3.6911423 | H  | -0.1423580 | -1.6509088 | 7.4267605  |
| C  | 0.1425844  | -1.9851546 | -3.9651770 | H  | 3.2036795  | 0.1045441  | 2.8173210  |
| C  | 0.0163797  | 0.8238846  | -3.9581724 | H  | -0.1930740 | 3.5030657  | 2.5405815  |
| C  | -1.1415048 | 0.0538712  | -4.1657701 | Zn | -0.5940679 | -2.3503581 | -1.4903036 |
| C  | -1.1125402 | -1.3526862 | -4.1629034 | Br | -0.7070637 | -4.6826056 | -1.6385910 |
| H  | 0.2039940  | -3.0816391 | -4.0609668 | H  | 0.8012103  | -1.7717343 | 5.0073942  |
| C  | -0.0524175 | 2.3414205  | -4.0944817 | H  | -3.0179351 | -3.7858227 | -1.0412628 |
| H  | -2.0934763 | 0.5748154  | -4.3352725 |    |            |            |            |
| C  | -1.2371465 | 2.9794904  | -3.3581120 |    |            |            |            |
| H  | -2.2129212 | 2.6970739  | -3.8034772 |    |            |            |            |
| H  | -1.1652394 | 4.0850963  | -3.4063398 |    |            |            |            |
| H  | -1.2629230 | 2.6801270  | -2.2937048 |    |            |            |            |
| C  | -0.0447859 | 2.7125506  | -5.5919235 |    |            |            |            |
| H  | 0.8778348  | 2.7565324  | -3.6558655 |    |            |            |            |
| H  | -0.9475034 | 2.3174304  | -6.1034002 |    |            |            |            |

TS3-8-r; COSMO



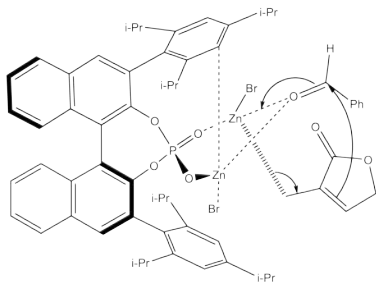

Energy(Hartree) = -11970.03406142

|    |            |            |            |
|----|------------|------------|------------|
| C  | -7.3110638 | -1.7951896 | 3.4661960  |
| C  | -3.2537343 | -2.2022371 | 2.1613058  |
| C  | -6.7539536 | -0.7956771 | 2.6507338  |
| C  | -5.2135895 | -3.0188682 | 3.4025216  |
| C  | -4.6408954 | -2.0112743 | 2.5818526  |
| C  | -6.5373534 | -2.9129454 | 3.8366722  |
| C  | -5.4306084 | -0.9014922 | 2.2034089  |
| O  | -2.6917889 | -1.5535992 | 1.1791278  |
| H  | -8.3532895 | -1.7098384 | 3.8102555  |
| H  | -4.6047032 | -3.8906721 | 3.6918527  |
| H  | -7.3565563 | 0.0742279  | 2.3482623  |
| H  | -6.9743780 | -3.7037354 | 4.4650096  |
| H  | -5.0237381 | -0.1232969 | 1.5405382  |
| Br | -4.2159500 | 1.7175865  | -0.0541620 |
| Zn | -2.5114115 | 0.6086471  | 1.1461599  |
| H  | -1.0745748 | -2.5780980 | 5.6834422  |
| H  | -1.2907054 | 1.5891551  | 3.0429327  |
| C  | -2.2980795 | -1.4967613 | 4.2391850  |
| C  | -1.2670262 | -2.5369591 | 4.5872197  |
| H  | -3.2670052 | -1.4459793 | 4.7511754  |
| C  | -1.6469516 | -0.4190269 | 3.6471254  |
| C  | -2.0986594 | 0.8467930  | 3.1926134  |
| C  | -0.2472193 | -0.8911543 | 3.3443791  |
| O  | -0.0645353 | -2.1180654 | 3.9222622  |
| O  | 0.6183327  | -0.3317885 | 2.7067033  |
| H  | -1.5021556 | -3.5675559 | 4.2436487  |
| H  | -3.0265849 | 1.2420043  | 3.6407486  |
| C  | 1.0818522  | -0.0727705 | -2.9295451 |
| C  | 2.3165303  | 0.5724276  | -3.0171952 |
| C  | 3.2907240  | 0.0297056  | -3.9359140 |
| C  | 4.6409383  | 0.4877270  | -3.9934916 |
| C  | 2.8967793  | -1.0442623 | -4.8195035 |
| C  | 3.8385747  | -1.5490892 | -5.7659326 |
| C  | 1.6051696  | -1.6361759 | -4.6881866 |
| H  | 1.3419018  | -2.4827710 | -5.3410227 |
| C  | 0.7132053  | -1.2150763 | -3.7110481 |
| C  | 2.5932922  | 2.7926145  | 0.1177987  |
| C  | 3.1731572  | 3.9363338  | -0.4184788 |
| H  | 3.4345820  | 4.7682924  | 0.2530053  |
| C  | 3.3877878  | 4.0894536  | -1.8169331 |
| C  | 3.8915954  | 5.3122377  | -2.3548067 |
| C  | 3.0456452  | 3.0096987  | -2.7109485 |
| C  | 3.1512551  | 3.2438380  | -4.1159162 |
| C  | 2.5748195  | 1.7610747  | -2.1559731 |
| C  | 2.3184259  | 1.7115106  | -0.7766507 |
| O  | 0.1273311  | 0.4246520  | -2.0577165 |
| O  | 1.8295908  | 0.5395260  | -0.1991492 |
| P  | 0.2753353  | 0.0912726  | -0.4478094 |
| O  | 0.2521915  | -1.4270158 | -0.1878669 |
| O  | -0.7770891 | 0.9678280  | 0.2152564  |
| C  | 5.1331379  | -1.0539222 | -5.8193887 |
| C  | 5.5393491  | -0.0405036 | -4.9111255 |
| H  | 3.5207991  | -2.3582423 | -6.4422220 |
| H  | 5.8510886  | -1.4576823 | -6.5493870 |
| H  | 4.9713465  | 1.2665226  | -3.2924887 |
| H  | 6.5767272  | 0.3269586  | -4.9301667 |

|   |            |            |            |
|---|------------|------------|------------|
| C | 3.6242332  | 4.4522851  | -4.6093379 |
| C | 4.0170697  | 5.4914390  | -3.7240385 |
| H | 2.8396897  | 2.4574525  | -4.8167864 |
| H | 3.6878415  | 4.6074686  | -5.6972624 |
| H | 4.3996810  | 6.4416673  | -4.1267118 |
| H | 4.1609284  | 6.1202363  | -1.6565081 |
| C | -0.3957825 | -3.1968158 | -2.6272226 |
| C | -0.5217013 | -1.9395314 | -3.2802384 |
| C | -1.5240277 | -3.7161332 | -1.9381459 |
| C | -1.7833241 | -1.2779977 | -3.3182559 |
| C | -2.8730528 | -1.8230451 | -2.6162118 |
| C | -2.7753899 | -3.0368873 | -1.9103758 |
| H | -1.4618149 | -4.7274995 | -1.5041021 |
| C | -1.9867649 | -0.0275121 | -4.1662481 |
| H | -3.8298846 | -1.2839085 | -2.6285462 |
| C | -2.7404453 | 1.0953446  | -3.4413499 |
| H | -3.7942117 | 0.8249476  | -3.2254989 |
| H | -2.7600519 | 2.0077005  | -4.0714151 |
| H | -2.2607025 | 1.3491585  | -2.4773424 |
| C | -2.6830034 | -0.4227127 | -5.4853209 |
| H | -0.9830153 | 0.3596863  | -4.4350466 |
| H | -3.6975798 | -0.8303924 | -5.2928257 |
| H | -2.1064256 | -1.1945891 | -6.0346623 |
| H | -2.7918964 | 0.4622506  | -6.1453320 |
| C | -3.9774178 | -3.6894356 | -1.2311215 |
| C | -5.1242331 | -2.7142437 | -0.9420694 |
| H | -5.8814714 | -3.1931603 | -0.2903490 |
| H | -5.6397388 | -2.4063742 | -1.8753730 |
| H | -4.7672050 | -1.7976854 | -0.4342619 |
| C | -4.4672890 | -4.8902301 | -2.0665449 |
| H | -3.6131792 | -4.1006529 | -0.2607264 |
| H | -5.3094527 | -5.3991048 | -1.5550369 |
| H | -3.6642438 | -5.6368274 | -2.2274339 |
| H | -4.8234977 | -4.5523045 | -3.0620294 |
| C | 0.8908518  | -4.0159445 | -2.6689778 |
| C | 1.3950031  | -4.4714274 | -1.2923199 |
| H | 2.3709241  | -4.9864326 | -1.4030444 |
| H | 0.7024673  | -5.1800710 | -0.7956363 |
| H | 1.5432028  | -3.6058708 | -0.6160568 |
| C | 0.7121248  | -5.2088405 | -3.6293603 |
| H | 1.6797841  | -3.3668980 | -3.0935823 |
| H | 1.6624496  | -5.7726768 | -3.7269251 |
| H | 0.4022420  | -4.8765635 | -4.6412777 |
| H | -0.0611441 | -5.9127361 | -3.2561625 |
| H | 0.4576300  | 3.2419891  | 6.0003504  |
| H | 5.5349572  | 1.4738984  | 3.5970432  |
| H | 0.1366908  | 6.5500869  | 0.7961715  |
| C | 1.2464220  | 2.4797628  | 5.8142010  |
| H | 4.7971863  | -1.0654451 | 1.7561340  |
| H | 0.3965540  | 1.0488291  | 7.2493336  |
| H | -1.7429187 | 4.8611908  | 0.6643910  |
| C | 1.6019169  | 2.5637120  | 4.3342019  |
| C | 5.5032032  | 1.5539702  | 2.4899894  |
| C | 0.6517661  | 1.1040336  | 6.1703841  |
| H | 1.3686834  | 0.2863372  | 5.9471552  |
| C | 2.6626413  | 1.8145163  | 3.7980834  |
| C | 0.6992135  | 5.8710426  | 1.4702021  |
| H | 2.8641041  | 3.8175794  | 6.4710908  |
| C | 0.8648312  | 3.3774866  | 3.4579716  |
| C | 2.4436555  | 2.8217339  | 6.7181650  |
| H | 2.1420533  | 2.8293053  | 7.7861285  |
| H | 0.0303989  | 3.9709575  | 3.8669628  |
| C | 3.9813881  | -0.4749018 | 2.2228240  |
| H | 6.3590819  | 0.9736752  | 2.0862698  |
| H | 5.6559815  | 2.6207547  | 2.2265707  |
| C | 2.9950139  | 1.8584654  | 2.4343548  |
| C | -1.1891397 | 4.1864324  | 1.3486897  |
| C | 1.1568125  | 3.4632189  | 2.0824082  |
| H | 1.7816357  | 6.0555001  | 1.3170248  |
| H | 0.4591390  | 6.1559536  | 2.5162264  |
| C | 4.1699179  | 1.0239891  | 1.9300839  |

|    |            |            |           |
|----|------------|------------|-----------|
| C  | 2.2423313  | 2.6986538  | 1.5703228 |
| C  | 0.3262162  | 4.3998165  | 1.2025294 |
| H  | 3.0083559  | -0.8325825 | 1.8367586 |
| H  | -1.4700593 | 3.1511013  | 1.0846025 |
| H  | 4.0026068  | -0.6815067 | 3.3133894 |
| H  | -0.2712424 | 0.9069854  | 5.5902928 |
| H  | -1.5473769 | 4.3968469  | 2.3779594 |
| H  | 3.2590979  | 2.0764218  | 6.6097162 |
| H  | 4.2176485  | 1.1386762  | 0.8280723 |
| H  | 0.5778388  | 4.1766114  | 0.1458428 |
| Zn | -1.1574382 | -2.6875143 | 0.2155550 |
| Br | -1.0154822 | -4.6817298 | 1.4807351 |
| H  | 3.2470672  | 1.1579422  | 4.4618863 |
| H  | -2.8026773 | -3.1805718 | 2.4192627 |

### TS3-8-r

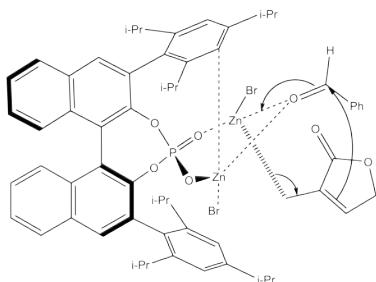

Energy(Hartree)= -11970.02300819  
number of imaginary frequencies: 1

|    |            |            |            |
|----|------------|------------|------------|
| C  | -7.3031525 | -1.7952801 | 3.4925704  |
| C  | -3.2552845 | -2.2102965 | 2.1573083  |
| C  | -6.7493080 | -0.7962633 | 2.6753654  |
| C  | -5.2098774 | -3.0235975 | 3.4098055  |
| C  | -4.6398624 | -2.0156036 | 2.5880100  |
| C  | -6.5297273 | -2.9156545 | 3.8543745  |
| C  | -5.4296301 | -0.9034543 | 2.2176566  |
| O  | -2.6954187 | -1.5603956 | 1.1775947  |
| H  | -8.3425742 | -1.7082304 | 3.8446531  |
| H  | -4.6006532 | -3.8983734 | 3.6896937  |
| H  | -7.3504800 | 0.0761888  | 2.3775824  |
| H  | -6.9643348 | -3.7071708 | 4.4835472  |
| H  | -5.0275713 | -0.1243720 | 1.5520313  |
| Br | -4.2343214 | 1.6761667  | -0.0674192 |
| Zn | -2.5178676 | 0.6098926  | 1.1384013  |
| H  | -1.0383113 | -2.5945800 | 5.6571623  |
| H  | -1.3054624 | 1.5907351  | 3.0384411  |
| C  | -2.2812916 | -1.5072915 | 4.2309518  |
| C  | -1.2372212 | -2.5418480 | 4.5619009  |
| H  | -3.2489763 | -1.4692924 | 4.7463648  |
| C  | -1.6443507 | -0.4210243 | 3.6389417  |
| C  | -2.1069438 | 0.8413254  | 3.1880238  |
| O  | -0.2401579 | -0.8778158 | 3.3289367  |
| O  | -0.0431336 | -2.1061624 | 3.8981734  |
| O  | 0.6159118  | -0.3038697 | 2.6926002  |
| H  | -1.4643165 | -3.5704845 | 4.2057650  |
| H  | -3.0382282 | 1.2285467  | 3.6358710  |
| C  | 1.0843730  | -0.0763123 | -2.9289498 |
| C  | 2.3193631  | 0.5685137  | -3.0158947 |
| C  | 3.2936592  | 0.0258987  | -3.9343664 |
| C  | 4.6435465  | 0.4842877  | -3.9911946 |
| C  | 2.9006354  | -1.0475814 | -4.8186962 |
| C  | 3.8433431  | -1.5510180 | -5.7642570 |
| C  | 1.6087274  | -1.6385072 | -4.6885677 |
| H  | 1.3449919  | -2.4850696 | -5.3413939 |
| C  | 0.7159815  | -1.2176776 | -3.7123316 |
| C  | 2.5908594  | 2.7892540  | 0.1186803  |

|   |            |            |            |
|---|------------|------------|------------|
| C | 3.1701695  | 3.9328454  | -0.4178524 |
| C | 3.4289416  | 4.7645724  | 0.2548921  |
| H | 3.3869920  | 4.0860231  | -1.8156092 |
| C | 3.8901538  | 5.3083708  | -2.3537114 |
| C | 3.0477098  | 3.0055090  | -2.7094051 |
| C | 3.1560826  | 3.2389675  | -4.1140055 |
| C | 2.5768662  | 1.7570250  | -2.1544958 |
| C | 2.3182329  | 1.7074837  | -0.7755796 |
| O | 0.1293437  | 0.4191569  | -2.0586765 |
| O | 1.8287189  | 0.5360885  | -0.1987400 |
| P | 0.2747550  | 0.0883025  | -0.4474788 |
| O | 0.2508484  | -1.4303911 | -0.1880562 |
| O | -0.7799842 | 0.9644795  | 0.2115119  |
| C | 5.1372900  | -1.0556608 | -5.8170211 |
| C | 5.5422831  | -0.0428214 | -4.9084514 |
| H | 3.5262594  | -2.3599795 | -6.4411549 |
| H | 5.8555955  | -1.4589417 | -6.5468615 |
| H | 4.9717782  | 1.2631928  | -3.2894636 |
| H | 6.5793668  | 0.3253322  | -4.9267445 |
| C | 3.6289417  | 4.4470903  | -4.6071146 |
| C | 4.0184650  | 5.4869714  | -3.7222049 |
| H | 2.8466689  | 2.4513085  | -4.8142447 |
| H | 3.6947745  | 4.6012913  | -5.6949957 |
| H | 4.4007331  | 6.4374337  | -4.1244957 |
| H | 4.1565807  | 6.1171809  | -1.6552710 |
| C | -0.3988283 | -3.1964900 | -2.6291871 |
| C | -0.5210171 | -1.9395976 | -3.2834768 |
| C | -1.5287279 | -3.7125265 | -1.9411349 |
| C | -1.7802757 | -1.2736421 | -3.3210593 |
| C | -2.8714171 | -1.8152082 | -2.6186582 |
| C | -2.7777731 | -3.0298273 | -1.9141496 |
| H | -1.4687263 | -4.7226740 | -1.5040876 |
| C | -1.9797653 | -0.0217450 | -4.1682188 |
| H | -3.8249119 | -1.2701454 | -2.6270207 |
| C | -2.7280738 | 1.1047171  | -3.4434501 |
| H | -3.7830025 | 0.8409465  | -3.2257188 |
| H | -2.7440328 | 2.0170164  | -4.0734812 |
| H | -2.2467085 | 1.3587678  | -2.4805853 |
| C | -2.6778562 | -0.4146558 | -5.4869163 |
| H | -0.9743458 | 0.3608387  | -4.4375849 |
| H | -3.6938497 | -0.8185789 | -5.2944031 |
| H | -2.1051319 | -1.1889379 | -6.0368010 |
| H | -2.7846700 | 0.4701696  | -6.1473869 |
| C | -3.9811477 | -3.6769954 | -1.2320093 |
| C | -5.1250212 | -2.6978548 | -0.9443887 |
| H | -5.8837695 | -3.1720992 | -0.2909178 |
| H | -5.6409051 | -2.3910624 | -1.8778590 |
| H | -4.7663479 | -1.7797184 | -0.4406646 |
| C | -4.4755668 | -4.8791906 | -2.0624473 |
| H | -3.6159989 | -4.0863352 | -0.2611367 |
| H | -5.3187038 | -5.3847335 | -1.5491793 |
| H | -3.6752612 | -5.6288652 | -2.2222342 |
| H | -4.8319426 | -4.5445092 | -3.0589254 |
| C | 0.8872454  | -4.0172340 | -2.6666924 |
| C | 1.3891217  | -4.4704094 | -1.2883613 |
| H | 2.3647895  | -4.9865106 | -1.3960899 |
| H | 0.6964989  | -5.1770692 | -0.7890514 |
| H | 1.5388526  | -3.6039205 | -0.6138855 |
| C | 0.7095072  | -5.2114887 | -3.6253639 |
| H | 1.6770532  | -3.3691617 | -3.0913625 |
| H | 1.6588246  | -5.7774025 | -3.7208167 |
| H | 0.4008142  | -4.8814967 | -4.6384138 |
| H | -0.0648989 | -5.9145423 | -3.2530738 |
| H | 0.4504439  | 3.2437910  | 5.9976773  |
| H | 5.5305696  | 1.4827006  | 3.6006482  |
| H | 0.1303961  | 6.5454379  | 0.7904019  |
| C | 1.2395865  | 2.4814120  | 5.8128218  |
| H | 4.8012865  | -1.0631033 | 1.7632536  |
| H | 0.3888194  | 1.0511410  | 7.2488748  |
| H | -1.7488715 | 4.8536092  | 0.6567209  |
| C | 1.5959471  | 2.5641010  | 4.3329986  |

|    |            |            |           |   |            |            |            |
|----|------------|------------|-----------|---|------------|------------|------------|
| C  | 5.4991088  | 1.5599927  | 2.4935166 | C | -1.2078303 | -3.2819830 | 1.8564521  |
| C  | 0.6446136  | 1.1061293  | 6.1699931 | O | -1.1274985 | -4.6221730 | 1.9435285  |
| H  | 1.3612332  | 0.2880416  | 5.9474934 | O | -0.2819750 | -2.6158760 | 1.3608571  |
| C  | 2.6573079  | 1.8151965  | 3.7987587 | H | -2.7929718 | -5.8277147 | 1.7063070  |
| C  | 0.6924047  | 5.8669796  | 1.4653027 | H | -3.8098235 | -1.1508239 | 2.8169918  |
| H  | 2.8561321  | 3.8204652  | 6.4680432 | C | 1.6741814  | 1.9992688  | -1.8745999 |
| C  | 0.8590546  | 3.3761149  | 3.4555428 | C | 2.5070436  | 2.7837781  | -1.0724478 |
| C  | 2.4357920  | 2.8253479  | 6.7170578 | C | 3.8048849  | 3.1412953  | -1.6006109 |
| H  | 2.1347044  | 2.8342513  | 7.7851408 | C | 4.8131530  | 3.7823466  | -0.8196279 |
| H  | 0.0245037  | 3.9702535  | 3.8633052 | C | 4.1168312  | 2.8077106  | -2.9711367 |
| C  | 3.9837630  | -0.4742113 | 2.2285994 | C | 5.3762580  | 3.2012891  | -3.5159940 |
| H  | 6.3572114  | 0.9814770  | 2.0921717 | C | 3.2005236  | 2.0284022  | -3.7365461 |
| H  | 5.6488660  | 2.6266983  | 2.2287940 | H | 3.4769142  | 1.7409916  | -4.7628631 |
| C  | 2.9911406  | 1.8577598  | 2.4356657 | C | 2.0126876  | 1.5559705  | -3.1933356 |
| C  | -1.1946231 | 4.1815683  | 1.3429112 | C | 1.2211997  | 2.5095005  | 2.5445920  |
| C  | 1.1516320  | 3.4605570  | 2.0803857 | C | 1.4134493  | 3.8120801  | 2.9931341  |
| H  | 1.7747968  | 6.0523499  | 1.3138726 | H | 1.1920947  | 4.0547223  | 4.0439128  |
| H  | 0.4519316  | 6.1529948  | 2.5107902 | C | 1.8228585  | 4.8576056  | 2.1189364  |
| C  | 4.1679892  | 1.0246910  | 1.9337492 | C | 1.9089154  | 6.2081847  | 2.5743128  |
| C  | 2.2383019  | 2.6963636  | 1.5706469 | C | 2.1086498  | 4.5570280  | 0.7366997  |
| C  | 0.3207900  | 4.3953315  | 1.1986543 | C | 2.3935902  | 5.6455599  | -0.1426042 |
| H  | 3.0130012  | -0.8376430 | 1.8427217 | C | 2.0614121  | 3.1832403  | 0.2924293  |
| H  | -1.4755007 | 3.1461321  | 1.0796409 | C | 1.5665210  | 2.2223958  | 1.1872227  |
| H  | 4.0054633  | -0.6805516 | 3.3191083 | O | 0.4192806  | 1.6425946  | -1.3935047 |
| H  | -0.2781029 | 0.9087960  | 5.5895522 | O | 1.4551569  | 0.8961256  | 0.7866931  |
| H  | -1.5552415 | 4.3938619  | 2.3709530 | P | 0.2915009  | 0.4425210  | -0.2841094 |
| H  | 3.2520469  | 2.0809514  | 6.6099073 | O | 0.8021977  | -0.8981854 | -0.8463027 |
| H  | 4.2162459  | 1.1377200  | 0.8315603 | O | -1.1231887 | 0.5263382  | 0.2678375  |
| H  | 0.5733420  | 4.1713692  | 0.1423599 | C | 6.3178169  | 3.8592483  | -2.7385417 |
| Zn | -1.1510187 | -2.6943220 | 0.2220907 | C | 6.0376179  | 4.1324486  | -1.3734432 |
| Br | -1.0424627 | -4.6989549 | 1.4667327 | H | 5.5937863  | 2.9512640  | -4.5664068 |
| H  | 3.2418644  | 1.1596535  | 4.4633775 | H | 7.2875799  | 4.1505694  | -3.1701153 |
| H  | -2.8048835 | -3.1899776 | 2.4129168 | H | 4.6169191  | 3.9927270  | 0.2405370  |

### int1-8-r; COSMO

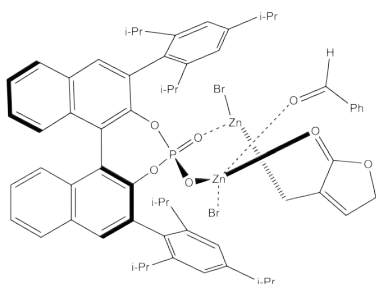

Energy(Hartree) = -11970.04158455

|    |            |            |            |   |            |            |            |
|----|------------|------------|------------|---|------------|------------|------------|
| C  | -6.6552337 | -4.8604752 | -0.9896148 | H | 0.1102746  | 2.5971298  | -6.1641117 |
| C  | -2.6049723 | -3.6226071 | -1.3774417 | H | -1.2011596 | 3.7271226  | -5.6817858 |
| C  | -6.1984072 | -3.7788392 | -0.2119072 | C | -1.5246324 | -2.8022283 | -4.7929466 |
| C  | -4.4598230 | -5.1026088 | -1.9886951 | C | -3.0123813 | -2.5088898 | -4.5550113 |
| C  | -3.9932993 | -4.0084364 | -1.2152871 | H | -3.6126568 | -3.4383014 | -4.6359804 |
| C  | -5.7878635 | -5.5242050 | -1.8776806 | H | -3.4111438 | -1.8012696 | -5.3115881 |
| C  | -4.8738603 | -3.3491107 | -0.3207828 | H | -3.2017944 | -2.0543873 | -3.5602274 |
| O  | -2.0396959 | -2.6580865 | -0.8100716 | C | -1.2874529 | -3.3058458 | -6.2304867 |
| H  | -7.7018086 | -5.1909072 | -0.9014608 | H | -1.2162953 | -3.6249834 | -4.1066784 |
| H  | -3.7676473 | -5.6108189 | -2.6785277 | H | -1.9050165 | -4.2027864 | -6.4458731 |
| H  | -6.8853293 | -3.2653585 | 0.4769406  | H | -0.2244579 | -3.5724327 | -6.3966820 |
| H  | -6.1529899 | -6.3684821 | -2.4808124 | H | -1.5568220 | -2.5192433 | -6.9663745 |
| H  | -4.5087035 | -2.5007104 | 0.2720300  | C | 3.1249531  | -1.1784093 | -3.6423845 |
| Br | -4.2939866 | 0.0405543  | -1.2695061 | C | 3.3346633  | -2.2920384 | -2.6051849 |
| Zn | -2.8104248 | -0.5780139 | 0.4508651  | H | 4.4186907  | -2.4499814 | -2.4283386 |
| H  | -2.1579281 | -5.7130860 | 3.3820049  |   |            |            |            |
| H  | -2.0424499 | -0.7681944 | 2.7802616  |   |            |            |            |
| C  | -3.2140694 | -3.9147790 | 2.6969496  |   |            |            |            |
| C  | -2.3759370 | -5.1256049 | 2.4626600  |   |            |            |            |
| H  | -4.2397610 | -3.9592904 | 3.0870408  |   |            |            |            |
| C  | -2.5130288 | -2.7902326 | 2.3526615  |   |            |            |            |
| C  | -2.8495730 | -1.3676144 | 2.3107748  |   |            |            |            |

|    |            |            |            |
|----|------------|------------|------------|
| H  | 2.9051706  | -3.2614685 | -2.9285298 |
| H  | 2.8647236  | -2.0224234 | -1.6393675 |
| C  | 3.8199628  | -1.5190027 | -4.9750172 |
| H  | 3.6204490  | -0.2751472 | -3.2368932 |
| H  | 4.9014084  | -1.7139122 | -4.8179758 |
| H  | 3.7214945  | -0.6923108 | -5.7084005 |
| H  | 3.3754970  | -2.4263355 | -5.4357394 |
| H  | -2.2379135 | -1.3020823 | 6.1345202  |
| H  | 3.5821110  | -0.5587365 | 5.3598834  |
| H  | -2.5493198 | 4.5777583  | 4.3100103  |
| C  | -1.1367523 | -1.4592723 | 6.1652447  |
| H  | 4.0509777  | -1.3351031 | 2.2951103  |
| H  | -1.3981860 | -3.6048559 | 6.5072631  |
| H  | -3.4963911 | 3.1796398  | 2.4113658  |
| C  | -0.5273877 | -0.4709085 | 5.1779245  |
| C  | 3.7795774  | 0.2272008  | 4.6009258  |
| C  | -0.8680261 | -2.9289487 | 5.8051005  |
| H  | 0.2118305  | -3.1768619 | 5.8656230  |
| C  | 0.7825955  | -0.6177556 | 4.6925930  |
| C  | -1.9495523 | 3.7060187  | 4.6443461  |
| H  | -0.8978484 | -0.0993188 | 7.8796220  |
| C  | -1.2551066 | 0.6554225  | 4.7583803  |
| C  | -0.6619162 | -1.1452768 | 7.5978849  |
| H  | -1.1436861 | -1.8201306 | 8.3359414  |
| H  | -2.2911702 | 0.7746270  | 5.1163736  |
| C  | 3.0089536  | -1.2366138 | 2.6634284  |
| H  | 4.8350708  | 0.1212183  | 4.2746871  |
| H  | 3.6713345  | 1.2114711  | 5.1005353  |
| C  | 1.3744375  | 0.3228718  | 3.8301864  |
| C  | -2.8870235 | 2.3117310  | 2.7370388  |
| C  | -0.7192608 | 1.6222578  | 3.8864318  |
| H  | -1.0322360 | 4.0895738  | 5.1360090  |
| H  | -2.5396295 | 3.1681485  | 5.4158347  |
| C  | 2.8233906  | 0.1028715  | 3.3993748  |
| C  | 0.6220500  | 1.4628179  | 3.4302017  |
| C  | -1.6115862 | 2.7882274  | 3.4549795  |
| H  | 2.3266975  | -1.3118031 | 1.7953214  |
| H  | -2.6271346 | 1.7253986  | 1.8347609  |
| H  | 2.8089171  | -2.1012239 | 3.3302587  |
| H  | -1.2136229 | -3.1624977 | 4.7788549  |
| H  | -3.5248686 | 1.6813077  | 3.3906527  |
| H  | 0.4375655  | -1.2757145 | 7.6832082  |
| H  | 3.0959161  | 0.9090586  | 2.6899169  |
| H  | -1.0458323 | 3.3939512  | 2.7203518  |
| Zn | 0.1238533  | -2.6838834 | -0.6676679 |
| Br | 0.6860752  | -4.7630693 | -1.5451552 |
| H  | 1.3761757  | -1.4917702 | 5.0024500  |
| H  | -1.9863804 | -4.2721927 | -2.0435985 |

### int1-8-r

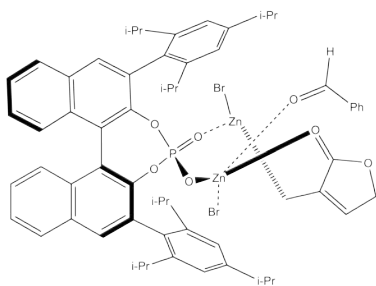

Energy(Hartree) = -11970.02868608

|   |            |            |            |
|---|------------|------------|------------|
| C | -6.5750544 | -5.0473728 | -0.8940365 |
| C | -2.5361845 | -3.7833392 | -1.3591189 |
| C | -6.2126259 | -3.7526595 | -0.4760052 |
| C | -4.3028452 | -5.4701218 | -1.6283892 |
| C | -3.9306001 | -4.1705860 | -1.2017260 |
| C | -5.6219510 | -5.9078915 | -1.4700694 |
| C | -4.8949141 | -3.3114660 | -0.6216987 |
| O | -2.0376814 | -2.7033794 | -0.9777267 |

|    |            |            |            |
|----|------------|------------|------------|
| H  | -7.6151783 | -5.3888119 | -0.7749423 |
| H  | -3.5443325 | -6.1276690 | -2.0827624 |
| H  | -6.9657957 | -3.0787824 | -0.0410415 |
| H  | -5.9144344 | -6.9160246 | -1.7994073 |
| H  | -4.6065143 | -2.2922040 | -0.3264449 |
| Br | -4.3548896 | 0.2467808  | -1.1992157 |
| Zn | -2.8549011 | -0.4042165 | 0.4760624  |
| H  | -2.4503443 | -5.7434714 | 3.0466774  |
| H  | -2.0474900 | -0.7748962 | 2.7744251  |
| C  | -3.4070405 | -3.8421929 | 2.4995384  |
| C  | -2.6391673 | -5.0794525 | 2.1734892  |
| H  | -4.4369406 | -3.8532381 | 2.8803048  |
| C  | -2.6428126 | -2.7383928 | 2.2334272  |
| C  | -2.8935928 | -1.3005706 | 2.2854356  |
| C  | -1.3623343 | -3.2656382 | 1.7064102  |
| O  | -1.3667236 | -4.6142798 | 1.6826692  |
| O  | -0.3997467 | -2.6177586 | 1.2685552  |
| H  | -3.1017128 | -5.6989287 | 1.3714829  |
| H  | -3.8372532 | -1.0579092 | 2.8105676  |
| C  | 1.6758713  | 2.0428727  | -1.8747120 |
| C  | 2.5169466  | -2.8189765 | -1.0727363 |
| C  | 3.8106597  | 3.1794306  | -1.6095033 |
| C  | 4.8275175  | 3.8104254  | -0.8320122 |
| C  | 4.1088405  | 2.8607293  | -2.9864218 |
| C  | 5.3621202  | 3.2609105  | -3.5391944 |
| C  | 3.1865581  | 2.0861130  | -3.7489792 |
| H  | 3.4534233  | 1.8048889  | -4.7796417 |
| C  | 2.0055793  | 1.6061534  | -3.1982225 |
| C  | 1.2548192  | 2.5158702  | 2.5509733  |
| C  | 1.4649503  | 3.8110716  | 3.0122994  |
| H  | 1.2529101  | 4.0430592  | 4.0673929  |
| C  | 1.8770242  | 4.8624045  | 2.1470086  |
| C  | 1.9797130  | 6.2066815  | 2.6159298  |
| C  | 2.1459847  | 4.5748320  | 0.7589177  |
| C  | 2.4293652  | 5.6708598  | -0.1110783 |
| C  | 2.0850867  | 3.2064079  | 0.3000216  |
| C  | 1.5902023  | 2.2396843  | 1.1887111  |
| O  | 0.4222276  | 1.6888668  | -1.3902872 |
| O  | 1.4664434  | 0.9184202  | 0.7762770  |
| P  | 0.2854482  | 0.4875141  | -0.2848691 |
| O  | 0.7659473  | -0.8595081 | -0.8534111 |
| O  | -1.1190239 | 0.5987281  | 0.2884083  |
| C  | 6.3114617  | 3.9101735  | -2.7648679 |
| C  | 6.0456880  | 4.1670410  | -1.3944309 |
| H  | 5.5687472  | 3.0219953  | -4.5943675 |
| H  | 7.2764758  | 4.2065541  | -3.2034421 |
| H  | 4.6418072  | 4.0080435  | 0.2323594  |
| H  | 6.8131525  | 4.6476842  | -0.7686846 |
| C  | 2.4992679  | 6.9702542  | 0.3712016  |
| C  | 2.2919922  | 7.2425375  | 1.7495650  |
| H  | 2.5821139  | 5.4776391  | -1.1816280 |
| H  | 2.7108942  | 7.7971502  | -0.3237440 |
| H  | 2.3598320  | 8.2759637  | 2.1222265  |
| H  | 1.7843771  | 6.4063860  | 3.6813269  |
| C  | 1.6660403  | -0.7888275 | -3.8735382 |
| C  | 1.1524715  | 0.5401379  | -3.8047487 |
| C  | 0.7710988  | -1.8354813 | -4.1596463 |
| C  | -0.2127619 | 0.7944064  | -4.1026016 |
| C  | -1.0634417 | -0.2880708 | -4.3882118 |
| C  | -0.6004020 | -1.6146808 | -4.3908858 |
| H  | 1.1497770  | -2.8704194 | -4.1722597 |
| C  | -0.7563510 | 2.2195515  | -4.1674878 |
| H  | -2.1239741 | -0.0814011 | -4.5897214 |
| C  | -2.0724896 | 2.4094752  | -3.3993537 |
| H  | -2.9104238 | 1.8452533  | -3.8576925 |
| H  | -2.3646080 | 3.4797568  | -3.3938674 |
| H  | -1.9832509 | 2.0699706  | -2.3501663 |
| C  | -0.8910575 | 2.6580261  | -5.6393683 |
| H  | -0.0002513 | 2.8855832  | -3.7021611 |
| H  | -1.6281871 | 2.0242782  | -6.1758624 |
| H  | 0.0756455  | 2.5748813  | -6.1765311 |

|    |            |            |            |
|----|------------|------------|------------|
| H  | -1.2358709 | 3.7108569  | -5.7079675 |
| C  | -1.5153044 | -2.8051438 | -4.6619817 |
| C  | -3.0056254 | -2.5075475 | -4.4457064 |
| H  | -3.6007032 | -3.4432638 | -4.4854364 |
| H  | -3.4038075 | -1.8400005 | -5.2380839 |
| H  | -3.2011361 | -2.0093951 | -3.4744551 |
| C  | -1.2692654 | -3.3751622 | -6.0727535 |
| H  | -1.2062728 | -3.5938571 | -3.9370121 |
| H  | -1.8822823 | -4.2837298 | -6.2489168 |
| H  | -0.2049560 | -3.6451681 | -6.2222530 |
| H  | -1.5376800 | -2.6254275 | -6.8462430 |
| C  | 3.1420654  | -1.1188796 | -3.6459620 |
| C  | 3.3807438  | -2.1583426 | -2.5399769 |
| H  | 4.4691395  | -2.3049470 | -2.3812105 |
| H  | 2.9440668  | -3.1471420 | -2.7850866 |
| H  | 2.9368904  | -1.8225449 | -1.5823391 |
| C  | 3.7996288  | -1.5482111 | -4.9714865 |
| H  | 3.6489455  | -0.1912584 | -3.3176950 |
| H  | 4.8855135  | -1.7311156 | -4.8321395 |
| H  | 3.6777534  | -0.7726846 | -5.7554832 |
| H  | 3.3468926  | -2.4849075 | -5.3589718 |
| H  | -2.2296634 | -1.1997079 | 6.2176921  |
| H  | 3.5725621  | -0.6247869 | 5.3188428  |
| H  | -2.4647845 | 4.6341517  | 4.3742199  |
| C  | -1.1479657 | -1.4500749 | 6.1447308  |
| H  | 4.0058535  | -1.3853824 | 2.2387476  |
| H  | -1.5492388 | -3.5904342 | 6.3839973  |
| H  | -3.4498907 | 3.2799795  | 2.4609482  |
| C  | -0.5333542 | -0.4578481 | 5.1648675  |
| C  | 3.7804547  | 0.1621701  | 4.5638299  |
| C  | -1.0423038 | -2.9087558 | 5.6699781  |
| H  | 0.0142074  | -3.2399794 | 5.5945448  |
| C  | 0.7688269  | -0.6269006 | 4.6657416  |
| C  | -1.8812756 | 3.7455311  | 4.6922161  |
| H  | -0.6484549 | -0.2341883 | 7.9094862  |
| C  | -1.2410673 | 0.6861889  | 4.7625735  |
| C  | -0.5339574 | -1.2754821 | 7.5471596  |
| H  | -1.0154943 | -1.9534347 | 8.2824511  |
| H  | -2.2709583 | 0.8236899  | 5.1316763  |
| C  | 2.9700584  | -1.2712760 | 2.6193735  |
| H  | 4.8318109  | 0.0379466  | 4.2310631  |
| H  | 3.6941214  | 1.1442635  | 5.0714858  |
| C  | 1.3736055  | 0.3098710  | 3.8093822  |
| C  | -2.8511329 | 2.3983012  | 2.7680382  |
| C  | -0.6921286 | 1.6513461  | 3.8965890  |
| H  | -0.9554388 | 4.1029140  | 5.1872740  |
| H  | -2.4790107 | 3.2083213  | 5.4580867  |
| C  | 2.8151460  | 0.0653556  | 3.3672362  |
| C  | 0.6418681  | 1.4699343  | 3.4280320  |
| C  | -1.5646656 | 2.8403450  | 3.4876182  |
| H  | 2.2788043  | -1.3284642 | 1.7570714  |
| H  | -2.6030325 | 1.8287844  | 1.8517872  |
| H  | 2.7624885  | -2.1383638 | 3.2806069  |
| H  | -1.5121087 | -3.0432549 | 4.6758428  |
| H  | -3.4954430 | 1.7636199  | 3.4110645  |
| H  | 0.5518747  | -1.5063625 | 7.5330500  |
| H  | 3.0985806  | 0.8717375  | 2.6625894  |
| H  | -0.9916895 | 3.4472604  | 2.7597956  |
| Zn | 0.1269447  | -2.6635584 | -0.7538163 |
| Br | 0.7947465  | -4.7307750 | -1.5806850 |
| H  | 1.3470908  | -1.5157452 | 4.9632980  |
| H  | -1.8586123 | -4.5420907 | -1.8271528 |

Energy(Hartree)= -11970.0356468

|    |            |            |            |
|----|------------|------------|------------|
| C  | -7.2324196 | -3.0922072 | 2.4376203  |
| C  | -3.3188832 | -2.9970472 | 0.7550330  |
| C  | -6.7279252 | -1.8684457 | 1.9630599  |
| C  | -5.1779576 | -4.2083053 | 1.7886788  |
| C  | -4.6551908 | -2.9732764 | 1.3171885  |
| C  | -6.4577340 | -4.2661434 | 2.3432028  |
| C  | -5.4497169 | -1.8038471 | 1.3972945  |
| O  | -2.7169716 | -2.0135129 | 0.2100911  |
| H  | -8.2402173 | -3.1365274 | 2.8787562  |
| H  | -4.5608229 | -5.1182207 | 1.7167143  |
| H  | -7.3378858 | -0.9546980 | 2.0258080  |
| H  | -6.8596070 | -5.2240006 | 2.7058487  |
| H  | -5.0764121 | -0.8458405 | 1.0028411  |
| Br | -4.2835082 | 1.4515023  | 0.2822171  |
| Zn | -2.5985903 | 0.0804198  | 1.2417140  |
| H  | -0.8838849 | -4.7434584 | 4.2303324  |
| H  | -1.5593637 | 0.0964346  | 3.4432909  |
| C  | -2.2164727 | -3.2383072 | 3.3825351  |
| C  | -1.1209520 | -4.2540272 | 3.2579881  |
| H  | -3.2162389 | -3.4762219 | 3.7688061  |
| C  | -1.7157480 | -1.9909107 | 3.1121939  |
| C  | -2.3002962 | -0.6643238 | 3.1174484  |
| C  | -0.2918574 | -2.1953788 | 2.6785695  |
| O  | 0.0283489  | -3.5230115 | 2.8137988  |
| O  | 0.5018238  | -1.3752967 | 2.2659407  |
| H  | -1.3235357 | -5.0594086 | 2.5160674  |
| H  | -3.2425077 | -0.5902378 | 3.6912610  |
| C  | 1.1742099  | 1.1508832  | -2.6749687 |
| C  | 2.3658067  | 1.8337779  | -2.4235276 |
| C  | 3.4153818  | 1.7368133  | -3.4116923 |
| C  | 4.7312764  | 2.2457824  | -3.1975214 |
| C  | 3.1384494  | 1.0697164  | -4.6636989 |
| C  | 4.1545507  | 1.0158405  | -5.6647983 |
| C  | 1.8877291  | 0.4109313  | -4.8569367 |
| H  | 1.7153032  | -0.1316594 | -5.7993241 |
| C  | 0.9243436  | 0.3814555  | -3.8576542 |
| C  | 2.3811371  | 2.6242995  | 1.3441610  |
| C  | 2.9048782  | 3.9118565  | 1.3430614  |
| H  | 3.0919423  | 4.4142228  | 2.3043326  |
| C  | 3.1578194  | 4.6233870  | 0.1365615  |
| C  | 3.6010906  | 5.9802720  | 0.1608369  |
| C  | 2.9203734  | 3.9788410  | -1.1325264 |
| C  | 3.0661410  | 4.7595332  | -2.3194795 |
| C  | 2.5086807  | 2.5941989  | -1.1496147 |
| C  | 2.2034321  | 1.9847354  | 0.0775619  |
| O  | 0.1490209  | 1.2306444  | -1.7485973 |
| O  | 1.7629809  | 0.6636072  | 0.1070856  |
| P  | 0.2423962  | 0.3011740  | -0.3837414 |
| O  | 0.2988217  | -1.1939408 | -0.7504482 |
| O  | -0.8795048 | 0.8181471  | 0.4997816  |
| C  | 5.4118290  | 1.5554047  | -5.4365668 |
| C  | 5.7045333  | 2.1574417  | -4.1840343 |
| H  | 3.9250879  | 0.5164494  | -6.6193509 |
| H  | 6.1880766  | 1.5004875  | -6.2149108 |
| H  | 4.9748003  | 2.7077601  | -2.2309521 |
| H  | 6.7130288  | 2.5535315  | -3.9900920 |
| C  | 3.4780079  | 6.0841269  | -2.2618405 |
| C  | 3.7669038  | 6.6982150  | -1.0138691 |
| H  | 2.8349563  | 4.3052629  | -3.2926747 |
| H  | 3.5745238  | 6.6644428  | -3.1922562 |
| H  | 4.1019082  | 7.7461786  | -0.9811772 |
| H  | 3.7910377  | 6.4521723  | 1.1377456  |
| C  | -0.0999693 | -1.9124887 | -3.6927841 |
| C  | -0.2774956 | -0.5077582 | -3.8274127 |
| C  | -1.2256806 | -2.7065052 | -3.3423906 |
| C  | -1.5782125 | 0.0612603  | -3.7116732 |
| C  | -2.6655218 | -0.7588585 | -3.3596886 |
| C  | -2.5226737 | -2.1440430 | -3.1618470 |
| H  | -1.1194956 | -3.8041694 | -3.3325475 |

### int2-8-r; COSMO

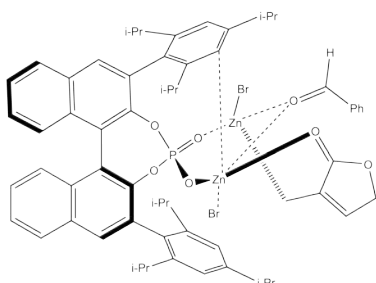

|    |            |            |            |
|----|------------|------------|------------|
| C  | -1.8201359 | 1.5310044  | -4.0345297 |
| H  | -3.6553794 | -0.2978272 | -3.2430047 |
| C  | -2.6925674 | 2.2556310  | -3.0014121 |
| H  | -3.7367715 | 1.8814055  | -2.9948934 |
| H  | -2.7354904 | 3.3389603  | -3.2345235 |
| H  | -2.2925242 | 2.1349006  | -1.9771503 |
| C  | -2.4070603 | 1.6420927  | -5.4573295 |
| H  | -0.8323091 | 2.0343452  | -4.0530909 |
| H  | -3.3996194 | 1.1483126  | -5.5177040 |
| H  | -1.7453697 | 1.1661439  | -6.2094819 |
| H  | -2.5396733 | 2.7070219  | -5.7384242 |
| C  | -3.7122878 | -3.0580239 | -2.8783820 |
| C  | -4.9380892 | -2.3200429 | -2.3256078 |
| H  | -5.6928270 | -3.0459348 | -1.9635241 |
| H  | -5.4255931 | -1.7035815 | -3.1089923 |
| H  | -4.6748445 | -1.6474931 | -1.4860658 |
| C  | -4.0750301 | -3.8606592 | -4.1450216 |
| H  | -3.3725128 | -3.7984303 | -2.1167246 |
| H  | -4.9064556 | -4.5633815 | -3.9332479 |
| H  | -3.2154808 | -4.4515491 | -4.5193445 |
| H  | -4.4000653 | -3.1782929 | -4.9578126 |
| C  | 1.2418032  | -2.5928970 | -3.9461314 |
| C  | 1.6882128  | -3.5514076 | -2.8335032 |
| H  | 2.7025959  | -3.9386712 | -3.0587998 |
| H  | 1.0176236  | -4.4273755 | -2.7267101 |
| H  | 1.7355169  | -3.0327083 | -1.8549073 |
| C  | 1.2091796  | -3.2964977 | -5.3178951 |
| H  | 2.0076355  | -1.7962199 | -4.0016564 |
| H  | 2.2011325  | -3.7345487 | -5.5516540 |
| H  | 0.9415085  | -2.5932852 | -6.1327960 |
| H  | 0.4648606  | -4.1203068 | -5.3283389 |
| H  | 0.0760404  | 0.5573063  | 6.8018242  |
| H  | 5.2899987  | 0.1165231  | 4.1134489  |
| H  | -0.2937684 | 5.6825780  | 3.3745173  |
| C  | 0.9062941  | -0.0344241 | 6.3565365  |
| H  | 4.7343268  | -1.4892165 | 1.3692945  |
| H  | 0.0982742  | -1.9538853 | 7.0573429  |
| H  | -2.0766944 | 4.1130056  | 2.4838299  |
| C  | 1.2905171  | 0.6552785  | 5.0525842  |
| C  | 5.2820264  | 0.6348965  | 3.1315350  |
| C  | 0.3741287  | -1.4575219 | 6.1033963  |
| H  | 1.1360447  | -2.0883980 | 5.5992864  |
| C  | 2.3979777  | 0.2257949  | 4.3024404  |
| C  | 0.2890943  | 4.8117118  | 3.7402858  |
| H  | 2.4388327  | 0.9832621  | 7.5627442  |
| C  | 0.5371807  | 1.7301579  | 4.5527532  |
| C  | 2.0646020  | -0.0424850 | 7.3694630  |
| H  | 1.7400721  | -0.4797951 | 8.3364891  |
| H  | -0.3359887 | 2.0749402  | 5.1310011  |
| C  | 3.8801885  | -1.1726198 | 2.0035773  |
| H  | 6.1780496  | 0.3011154  | 2.5675418  |
| H  | 5.3831791  | 1.7225296  | 3.3256562  |
| C  | 2.7638210  | 0.8361138  | 3.0917877  |
| C  | -1.5022735 | 3.2467051  | 2.8707020  |
| C  | 0.8597891  | 2.3808265  | 3.3456094  |
| H  | 1.3631616  | 5.0858145  | 3.7209418  |
| H  | 0.0104980  | 4.6383228  | 4.8011127  |
| C  | 3.9938914  | 0.3231235  | 2.3468368  |
| C  | 1.9951661  | 1.9322522  | 2.6144791  |
| C  | 0.0022359  | 3.5615116  | 2.8858072  |
| H  | 2.9336093  | -1.3839635 | 1.4713709  |
| H  | -1.7174527 | 2.3891544  | 2.2080666  |
| H  | 3.8949949  | -1.8013884 | 2.9186348  |
| H  | -0.5239598 | -1.4389055 | 5.4554111  |
| H  | -1.8950643 | 3.0151943  | 3.8825249  |
| H  | 2.9192252  | -0.6483695 | 7.0023220  |
| H  | 4.0627607  | 0.8742273  | 1.3872251  |
| H  | 0.2884115  | 3.7957026  | 1.8402674  |
| Zn | -1.0070902 | -2.5893935 | -0.9728507 |
| Br | -0.7994641 | -4.8941870 | -0.4868519 |
| H  | 2.9962865  | -0.6248229 | 4.6654788  |

H -2.8239092 -3.9921393 0.7028513

### int2-8-r

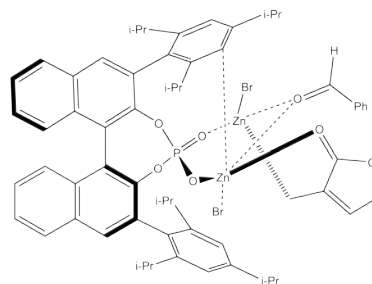

Energy(Hartree)= -11970.02388453

|    |            |            |            |
|----|------------|------------|------------|
| C  | -7.2274023 | -3.1555509 | 2.4313414  |
| C  | -3.2987646 | -3.0148713 | 0.7774096  |
| C  | -6.7261069 | -1.9239783 | 1.9768286  |
| C  | -5.1606069 | -4.2489661 | 1.7838740  |
| C  | -4.6410554 | -3.0055145 | 1.3324034  |
| C  | -6.4441410 | -4.3227166 | 2.3272364  |
| C  | -5.4436799 | -1.8430905 | 1.4216627  |
| O  | -2.7108119 | -2.0265674 | 0.2250107  |
| H  | -8.2384912 | -3.2123682 | 2.8635340  |
| H  | -4.5366700 | -5.1536962 | 1.7030799  |
| H  | -7.3404143 | -1.0134983 | 2.0448347  |
| H  | -6.8428673 | -5.2882445 | 2.6729744  |
| H  | -5.0762205 | -0.8765156 | 1.0411757  |
| Br | -4.3108867 | 1.3886766  | 0.2476775  |
| Zn | -2.6065645 | 0.0730092  | 1.2197808  |
| H  | -0.8507834 | -4.7344094 | 4.1822511  |
| H  | -1.5524794 | 0.1099132  | 3.4140864  |
| C  | -2.1972625 | -3.2363958 | 3.3409452  |
| C  | -1.0897793 | -4.2410883 | 3.2116708  |
| H  | -3.1931360 | -3.4832183 | 3.7312231  |
| C  | -1.7016227 | -1.9799297 | 3.0945200  |
| C  | -2.2910414 | -0.6604696 | 3.1076835  |
| C  | -0.2732135 | -2.1707838 | 2.6628219  |
| O  | 0.0530149  | -3.4977591 | 2.7780003  |
| O  | 0.5149826  | -1.3384700 | 2.2671131  |
| H  | -1.2797208 | -5.0430850 | 2.4623875  |
| H  | -3.2338102 | -0.5859368 | 3.6798154  |
| C  | 1.1792858  | 1.1456794  | -2.6745060 |
| C  | 2.3742138  | 1.8229242  | -2.4233821 |
| C  | 3.4212141  | 1.7244071  | -3.4139492 |
| C  | 4.7396549  | 2.2260613  | -3.1998956 |
| C  | 3.1389123  | 1.0649009  | -4.6685438 |
| C  | 4.1530198  | 1.0115842  | -5.6710327 |
| C  | 1.8844013  | 0.4140386  | -4.8620588 |
| H  | 1.7060948  | -0.1229390 | -5.8067057 |
| C  | 0.9232681  | 0.3836132  | -3.8608392 |
| C  | 2.3853583  | 2.6160660  | 1.3436875  |
| C  | 2.9148778  | 3.9009460  | 1.3418008  |
| H  | 3.0997222  | 4.4025664  | 2.3038553  |
| C  | 3.1754271  | 4.6097529  | 0.1357875  |
| C  | 3.6250661  | 5.9640115  | 0.1590633  |
| C  | 2.9382512  | 3.9647840  | -1.1328178 |
| C  | 3.0902840  | 4.7437422  | -2.3198280 |
| C  | 2.5208410  | 2.5818216  | -1.1492392 |
| C  | 2.2103538  | 1.9746153  | 0.0777406  |
| O  | 0.1562885  | 1.2247829  | -1.7473160 |
| O  | 1.7671772  | 0.6543689  | 0.1082014  |
| P  | 0.2471853  | 0.2935216  | -0.3836535 |
| O  | 0.3014596  | -1.2014984 | -0.7546022 |

|   |            |            |            |    |            |            |            |
|---|------------|------------|------------|----|------------|------------|------------|
| O | -0.8769822 | 0.8067141  | 0.4986969  | H  | 5.3679638  | 1.7539673  | 3.3366371  |
| C | 5.4127940  | 1.5438809  | -5.4427887 | C  | 2.7601917  | 0.8392726  | 3.1030508  |
| C | 5.7103019  | 2.1382321  | -4.1883582 | C  | -1.5107231 | 3.2455451  | 2.8427054  |
| H | 3.9195271  | 0.5179163  | -6.6276208 | C  | 0.8496349  | 2.3798018  | 3.3341108  |
| H | 6.1871852  | 1.4890214  | -6.2229146 | H  | 1.3535721  | 5.0863762  | 3.6909578  |
| H | 4.9854039  | 2.6823840  | -2.2313184 | H  | -0.0017776 | 4.6477183  | 4.7693523  |
| H | 6.7208372  | 2.5287872  | -3.9941681 | C  | 3.9977376  | 0.3276556  | 2.3698958  |
| C | 3.5090444  | 6.0657296  | -2.2627017 | C  | 1.9914181  | 1.9297575  | 2.6144628  |
| C | 3.7978962  | 6.6796459  | -1.0153678 | C  | -0.0056989 | 3.5572592  | 2.8616944  |
| H | 2.8586511  | 4.2891575  | -3.2926204 | H  | 2.9595824  | -1.4022135 | 1.5104151  |
| H | 3.6106416  | 6.6442337  | -3.1936431 | H  | -1.7260012 | 2.3840697  | 2.1854397  |
| H | 4.1380276  | 7.7258983  | -0.9827937 | H  | 3.9184411  | -1.7921774 | 2.9659193  |
| H | 3.8139191  | 6.4360530  | 1.1360838  | H  | -0.5402813 | -1.4320724 | 5.4555285  |
| C | -0.1124099 | -1.9057586 | -3.7056700 | H  | -1.9091464 | 3.0233166  | 3.8544118  |
| C | -0.2829142 | -0.4993773 | -3.8309771 | H  | 2.8907241  | -0.6228751 | 7.0226249  |
| C | -1.2399201 | -2.6947515 | -3.3525062 | H  | 4.0656136  | 0.8673970  | 1.4037241  |
| C | -1.5794017 | 0.0767113  | -3.7014386 | H  | 0.2847582  | 3.7834355  | 1.8155218  |
| C | -2.6677293 | -0.7387875 | -3.3427262 | Zn | -1.0001010 | -2.5999796 | -0.9648772 |
| C | -2.5308720 | -2.1260400 | -3.1551600 | Br | -0.8287146 | -4.9146248 | -0.5352228 |
| H | -1.1386059 | -3.7927860 | -3.3430266 | H  | 2.9850856  | -0.6120376 | 4.6857287  |
| C | -1.8157107 | 1.5492115  | -4.0171064 | H  | -2.7975471 | -4.0061109 | 0.7170361  |
| H | -3.6524703 | -0.2714059 | -3.2090114 |    |            |            |            |
| C | -2.6734094 | 2.2782648  | -2.9749869 |    |            |            |            |
| H | -3.7191465 | 1.9094539  | -2.9541948 |    |            |            |            |
| H | -2.7145874 | 3.3615102  | -3.2082641 |    |            |            |            |
| H | -2.2623703 | 2.1589420  | -1.9552051 |    |            |            |            |
| C | -2.4148847 | 1.6667811  | -5.4342428 |    |            |            |            |
| H | -0.8245588 | 2.0457354  | -4.0442686 |    |            |            |            |
| H | -3.4111069 | 1.1796681  | -5.4867128 |    |            |            |            |
| H | -1.7640886 | 1.1878837  | -6.1939228 |    |            |            |            |
| H | -2.5441198 | 2.7327616  | -5.7127620 |    |            |            |            |
| C | -3.7226719 | -3.0347767 | -2.8626912 |    |            |            |            |
| C | -4.9385437 | -2.2922207 | -2.2943520 |    |            |            |            |
| H | -5.6928843 | -3.0144373 | -1.9238234 |    |            |            |            |
| H | -5.4332489 | -1.6729849 | -3.0710357 |    |            |            |            |
| H | -4.6636898 | -1.6202452 | -1.4581291 |    |            |            |            |
| C | -4.1030713 | -3.8317683 | -4.1274422 |    |            |            |            |
| H | -3.3777519 | -3.7792059 | -2.1072174 |    |            |            |            |
| H | -4.9363042 | -4.5308976 | -3.9105635 |    |            |            |            |
| H | -3.2511385 | -4.4263438 | -4.5129972 |    |            |            |            |
| H | -4.4324971 | -3.1459082 | -4.9354713 |    |            |            |            |
| C | 1.2248293  | -2.5930305 | -3.9668905 |    |            |            |            |
| C | 1.6832682  | -3.5354348 | -2.8450757 |    |            |            |            |
| H | 2.6939960  | -3.9289565 | -3.0760019 |    |            |            |            |
| H | 1.0129234  | -4.4084053 | -2.7149323 |    |            |            |            |
| H | 1.7448477  | -3.0017961 | -1.8754978 |    |            |            |            |
| C | 1.1754712  | -3.3156406 | -5.3278562 |    |            |            |            |
| H | 1.9910872  | -1.7985517 | -4.0430810 |    |            |            |            |
| H | 2.1635588  | -3.7589270 | -5.5681277 |    |            |            |            |
| H | 0.8984266  | -2.6239283 | -6.1495236 |    |            |            |            |
| H | 0.4306963  | -4.1390139 | -5.3195662 |    |            |            |            |
| H | 0.0454512  | 0.5719468  | 6.7937471  |    |            |            |            |
| H | 5.2857886  | 0.1592659  | 4.1461872  |    |            |            |            |
| H | -0.3013891 | 5.6822475  | 3.3348256  |    |            |            |            |
| C | 0.8809837  | -0.0193667 | 6.3575310  |    |            |            |            |
| H | 4.7603871  | -1.4887035 | 1.4174772  |    |            |            |            |
| H | 0.0764957  | -1.9397254 | 7.0617085  |    |            |            |            |
| H | -2.0825082 | 4.1089591  | 2.4462929  |    |            |            |            |
| C | 1.2729042  | 0.6651924  | 5.0531823  |    |            |            |            |
| C | 5.2784348  | 0.6630424  | 3.1568269  |    |            |            |            |
| C | 0.3550384  | -1.4453367 | 6.1074697  |    |            |            |            |
| H | 1.1213435  | -2.0751891 | 5.6088374  |    |            |            |            |
| C | 2.3870610  | 0.2349867  | 4.3141347  |    |            |            |            |
| C | 0.2793661  | 4.8132649  | 3.7080843  |    |            |            |            |
| H | 2.4014320  | 1.0098842  | 7.5681124  |    |            |            |            |
| C | 0.5203447  | 1.7349847  | 4.5421955  |    |            |            |            |
| C | 2.0312367  | -0.0178863 | 7.3793384  |    |            |            |            |
| H | 1.7016700  | -0.4502104 | 8.3468820  |    |            |            |            |
| H | -0.3572108 | 2.0813501  | 5.1127782  |    |            |            |            |
| C | 3.9008237  | -1.1730188 | 2.0444977  |    |            |            |            |
| H | 6.1809227  | 0.3297572  | 2.6030842  |    |            |            |            |

### int3-8-r; COSMO

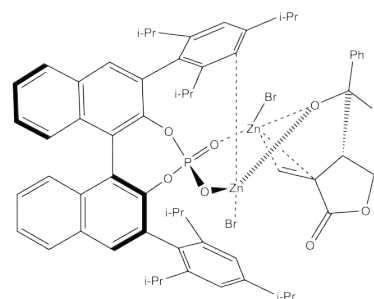

Energy(Hartree) = -11970.06045568

|    |            |            |            |
|----|------------|------------|------------|
| C  | -7.3140798 | -2.0973722 | 2.9207628  |
| C  | -2.9793782 | -2.0871535 | 2.6266074  |
| C  | -6.6201413 | -0.8752955 | 2.9532101  |
| C  | -5.1977972 | -3.2757485 | 2.7046949  |
| C  | -4.4927525 | -2.0552625 | 2.7323096  |
| C  | -6.5987119 | -3.2999347 | 2.8012834  |
| C  | -5.2204345 | -0.8565874 | 2.8693536  |
| O  | -2.4833107 | -1.5123979 | 1.4076556  |
| H  | -8.4127742 | -2.1111077 | 2.9897123  |
| H  | -4.6362223 | -4.2181558 | 2.5980037  |
| H  | -7.1714162 | 0.0734178  | 3.0423077  |
| H  | -7.1329640 | -4.2622538 | 2.7762889  |
| H  | -4.7012731 | 0.1133535  | 2.8856562  |
| Br | -4.0762989 | 1.9878267  | 0.8540293  |
| Zn | -2.3759326 | 0.4421311  | 1.2081927  |
| H  | -1.0110778 | -2.3092402 | 5.5425840  |
| H  | -0.9280569 | 1.7517282  | 3.3062694  |
| C  | -2.2683140 | -1.4915880 | 3.9173454  |
| C  | -1.1797724 | -2.4472883 | 4.4538427  |
| H  | -3.0311992 | -1.2767925 | 4.6888158  |
| C  | -1.4274952 | -0.2921711 | 3.5886289  |
| C  | -1.7262359 | 1.0307376  | 3.5546666  |
| C  | -0.0429486 | -0.8152580 | 3.2837805  |
| O  | 0.0350701  | -2.0916977 | 3.7520968  |
| O  | 0.8727730  | -0.2562404 | 2.7259756  |
| H  | -1.3830816 | -3.5139171 | 4.2412441  |
| H  | -2.7150931 | 1.4155744  | 3.8488929  |
| C  | 0.8582359  | -0.0345046 | -2.9265130 |
| C  | 2.1352905  | 0.5007647  | -3.0942943 |
| C  | 2.9669662  | -0.0727521 | -4.1270240 |
| C  | 4.3461611  | 0.2572407  | -4.2828948 |
| C  | 2.3902253  | -1.0436383 | -5.0291363 |

|   |            |            |            |    |            |            |           |
|---|------------|------------|------------|----|------------|------------|-----------|
| C | 3.1914691  | -1.5747598 | -6.0843741 | C  | 1.9088416  | 2.2892159  | 5.8498482 |
| C | 1.0594964  | -1.5131067 | -4.8156987 | H  | 4.8986965  | -1.4376233 | 1.5042499 |
| H | 0.6543563  | -2.2813660 | -5.4922555 | H  | 1.0729041  | 0.8883199  | 7.3233635 |
| C | 0.3043415  | -1.0770934 | -3.7350069 | H  | -1.2882294 | 4.8846976  | 0.9253438 |
| C | 2.8570431  | 2.5732770  | 0.0741894  | C  | 2.1676642  | 2.3707657  | 4.3499122 |
| C | 3.4895634  | 3.6812553  | -0.4773600 | C  | 5.8498414  | 1.0920199  | 2.2474892 |
| H | 3.8708596  | 4.4665099  | 0.1932230  | C  | 1.2643412  | 0.9426238  | 6.2313401 |
| C | 3.6046760  | 3.8632566  | -1.8832965 | H  | 1.9220945  | 0.0915201  | 5.9572686 |
| C | 4.1660133  | 5.0578531  | -2.4274937 | C  | 3.1420866  | 1.5655666  | 3.7363541 |
| C | 3.0964895  | 2.8476678  | -2.7728831 | C  | 1.2519625  | 5.7464828  | 1.5792265 |
| C | 3.1001957  | 3.1241538  | -4.1743817 | H  | 3.6370773  | 3.5278153  | 6.4111968 |
| C | 2.5700671  | 1.6218780  | -2.2143632 | C  | 1.4190880  | 3.2341602  | 3.5324130 |
| C | 2.4232121  | 1.5449725  | -0.8195973 | C  | 3.1806846  | 2.5522670  | 6.6746268 |
| O | 0.0416025  | 0.4858162  | -1.9355947 | H  | 2.9521000  | 2.5597612  | 7.7604900 |
| O | 1.8942005  | 0.3945179  | -0.2288084 | H  | 0.6572175  | 3.8776451  | 4.0036503 |
| P | 0.3072213  | 0.0281533  | -0.3758648 | C  | 4.1531483  | -0.7976628 | 2.0205653 |
| O | 0.2016274  | -1.4934997 | -0.1868314 | H  | 6.6294766  | 0.4601691  | 1.7732598 |
| O | -0.6423784 | 0.9321932  | 0.4186385  | H  | 6.0729128  | 2.1519010  | 2.0077150 |
| C | 4.5205840  | -1.2047797 | -6.2280102 | C  | 3.3733859  | 1.5964740  | 2.3514290 |
| C | 5.1043993  | -0.2954528 | -5.3064786 | C  | -0.7311604 | 4.1655005  | 1.5600915 |
| H | 2.7365833  | -2.3041984 | -6.7729456 | C  | 1.6131755  | 3.3097707  | 2.1391150 |
| H | 5.1285697  | -1.6286657 | -7.0416760 | H  | 2.3312615  | 5.8721466  | 1.3585918 |
| H | 4.8117966  | 0.9551506  | -3.5733316 | H  | 1.0948065  | 6.0326230  | 2.6405753 |
| H | 6.1682597  | -0.0292601 | -5.4004070 | C  | 4.4471641  | 0.6897528  | 1.7557165 |
| C | 3.6320599  | 4.3058219  | -4.6725825 | C  | 2.6079710  | 2.4821212  | 1.5476502 |
| C | 4.1895784  | 5.2751714  | -3.7965686 | C  | 0.7816153  | 4.3015695  | 1.3227785 |
| H | 2.6614677  | 2.3945963  | -4.8682026 | H  | 3.1402454  | -1.0682742 | 1.6679200 |
| H | 3.6140037  | 4.4947203  | -5.7568633 | H  | -1.0857356 | 3.1524460  | 1.2963397 |
| H | 4.6179552  | 6.2034602  | -4.2042526 | H  | 4.2029796  | -1.0336349 | 3.1041498 |
| H | 4.5625065  | 5.8144922  | -1.7323142 | H  | 0.2981075  | 0.7996047  | 5.7078892 |
| C | -0.9011020 | -3.0132560 | -2.6725289 | H  | -1.0126452 | 4.3765870  | 2.6131706 |
| C | -0.9546692 | -1.7034332 | -3.2278263 | H  | 3.9450860  | 1.7660223  | 6.5025340 |
| C | -2.0053312 | -3.4710917 | -1.9052598 | H  | 4.4384456  | 0.8353095  | 0.6560593 |
| C | -2.1349312 | -0.9191619 | -3.0862226 | H  | 0.9550416  | 4.0798297  | 0.2502056 |
| C | -3.2099430 | -1.4177785 | -2.3296514 | Zn | -1.2914633 | -2.6944009 | 0.2992807 |
| C | -3.1773235 | -2.6848408 | -1.7216781 | Br | -1.1856351 | -4.8127373 | 1.3551137 |
| H | -2.0034258 | -4.5127581 | -1.5445499 | H  | 3.7338193  | 0.8720187  | 4.3545437 |
| C | -2.2886858 | 0.4252908  | -3.7898567 | H  | -2.6946772 | -3.1585502 | 2.6008695 |
| H | -4.1072893 | -0.7947496 | -2.2202097 |    |            |            |           |
| C | -2.8442125 | 1.5313488  | -2.8796323 |    |            |            |           |
| H | -3.8948930 | 1.3411896  | -2.5787499 |    |            |            |           |
| H | -2.8292100 | 2.5048399  | -3.4102853 |    |            |            |           |
| H | -2.2432793 | 1.6348799  | -1.9562923 |    |            |            |           |
| C | -3.1545748 | 0.2421809  | -5.0533759 |    |            |            |           |
| H | -1.2829607 | 0.7438123  | -4.1311237 |    |            |            |           |
| H | -4.1815001 | -0.0854288 | -4.7880237 |    |            |            |           |
| H | -2.7220766 | -0.5182889 | -5.7348396 |    |            |            |           |
| H | -3.2359866 | 1.1984147  | -5.6099739 |    |            |            |           |
| C | -4.3767997 | -3.2531588 | -0.9686318 |    |            |            |           |
| C | -5.4323395 | -2.2004913 | -0.6175502 |    |            |            |           |
| H | -6.2094855 | -2.6418145 | 0.0354708  |    |            |            |           |
| H | -5.9395192 | -1.8147301 | -1.5264335 |    |            |            |           |
| H | -4.9910402 | -1.3429460 | -0.0734634 |    |            |            |           |
| C | -5.0013656 | -4.4205538 | -1.7595776 |    |            |            |           |
| H | -3.9849497 | -3.6774004 | -0.0157360 |    |            |            |           |
| H | -5.8400740 | -4.8668509 | -1.1874537 |    |            |            |           |
| H | -4.2661351 | -5.2234305 | -1.9665749 |    |            |            |           |
| H | -5.4008426 | -4.0645533 | -2.7321555 |    |            |            |           |
| C | 0.2790764  | -3.9502925 | -2.9131974 |    |            |            |           |
| C | 0.8632791  | -4.5797316 | -1.6416252 |    |            |            |           |
| H | 1.7677209  | -5.1681976 | -1.8977745 |    |            |            |           |
| H | 0.1542168  | -5.2654855 | -1.1369282 |    |            |            |           |
| H | 1.1620073  | -3.8005947 | -0.9119262 |    |            |            |           |
| C | -0.1213351 | -5.0258394 | -3.9431742 |    |            |            |           |
| H | 1.0898278  | -3.3482625 | -3.3650808 |    |            |            |           |
| H | 0.7473705  | -5.6716069 | -4.1861061 |    |            |            |           |
| H | -0.4894903 | -4.5727761 | -4.8864132 |    |            |            |           |
| H | -0.9278459 | -5.6785315 | -3.5480286 |    |            |            |           |
| H | 1.1778633  | 3.0910908  | 6.0960782  |    |            |            |           |
| H | 5.9426144  | 0.9699347  | 3.3472150  |    |            |            |           |
| H | 0.6871398  | 6.4634521  | 0.9477597  |    |            |            |           |

### int3-8-r

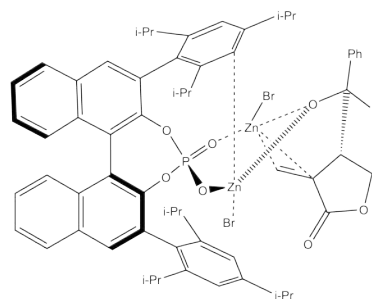

Energy(Hartree)= -11970.0499204

|    |            |            |           |
|----|------------|------------|-----------|
| C  | -7.3164888 | -2.1070878 | 2.9261856 |
| C  | -2.9833356 | -2.0879647 | 2.6151927 |
| C  | -6.6275910 | -0.8824485 | 2.9348437 |
| C  | -5.1969838 | -3.2799736 | 2.7187629 |
| C  | -4.4966757 | -2.0564301 | 2.7247018 |
| C  | -6.5969431 | -3.3081326 | 2.8223303 |
| C  | -5.2286598 | -0.8588565 | 2.8446246 |
| O  | -2.4839165 | -1.5087177 | 1.4024622 |
| H  | -8.4147644 | -2.1241948 | 2.9998211 |
| H  | -4.6310745 | -4.2208005 | 2.6209268 |
| H  | -7.1815142 | 0.0660048  | 3.0069874 |
| H  | -7.1274650 | -4.2727818 | 2.8144148 |
| H  | -4.7150939 | 0.1141323  | 2.8346539 |
| Br | -4.0756474 | 2.0007478  | 0.8708819 |
| Zn | -2.3858159 | 0.4458169  | 1.1909233 |
| H  | -0.9989773 | -2.3469491 | 5.5159829 |
| H  | -0.9559571 | 1.7533544  | 3.3154312 |



|   |            |            |            |    |            |            |            |
|---|------------|------------|------------|----|------------|------------|------------|
| C | -2.2676414 | -1.5054051 | 3.9098076  | H  | -4.2615924 | -5.2319861 | -1.9560981 |
| C | -1.1686210 | -2.4635827 | 4.4239768  | H  | -5.4012921 | -4.0818430 | -2.7261269 |
| H | -3.0297600 | -1.3083556 | 4.6873621  | C  | 0.2776795  | -3.9481510 | -2.9209009 |
| C | -1.4369263 | -0.2953092 | 3.5938213  | C  | 0.8805515  | -4.5443569 | -1.6413578 |
| C | -1.7475509 | 1.0244558  | 3.5621708  | H  | 1.7834813  | -5.1369120 | -1.8934573 |
| O | -0.0478918 | -0.8027943 | 3.2833179  | H  | 0.1809231  | -5.2188573 | -1.1090362 |
| O | 0.0397400  | -2.0872659 | 3.7290043  | H  | 1.1872042  | -3.7462690 | -0.9360608 |
| O | 0.8630813  | -0.2262502 | 2.7368470  | C  | -0.1265279 | -5.0484215 | -3.9223431 |
| H | -1.3653983 | -3.5272435 | 4.1892122  | H  | 1.0793098  | -3.3514803 | -3.3954185 |
| H | -2.7425130 | 1.4004940  | 3.8464316  | H  | 0.7433467  | -5.6938286 | -4.1620478 |
| C | 0.8576454  | -0.0337417 | -2.9276511 | H  | -0.5095615 | -4.6187454 | -4.8706518 |
| C | 2.1357135  | 0.4995342  | -3.0947536 | H  | -0.9232692 | -5.6994119 | -3.5053422 |
| C | 2.9654117  | -0.0727193 | -4.1296185 | H  | 1.1833931  | 3.1059482  | 6.0951989  |
| C | 4.3450074  | 0.2548434  | -4.2850683 | H  | 5.9446770  | 0.9744770  | 3.3470975  |
| C | 2.3862839  | -1.0385438 | -5.0353380 | H  | 0.6892117  | 6.4606426  | 0.9389266  |
| C | 3.1860727  | -1.5661624 | -6.0928406 | C  | 1.9120009  | 2.3009991  | 5.8511913  |
| C | 1.0547886  | -1.5052353 | -4.8225293 | H  | 4.8949311  | -1.4455569 | 1.5200752  |
| H | 0.6465831  | -2.2704381 | -5.5008973 | H  | 1.0719096  | 0.9058895  | 7.3289314  |
| C | 0.3011805  | -1.0724348 | -3.7396171 | H  | -1.2867289 | 4.8773980  | 0.9179575  |
| C | 2.8603851  | 2.5676124  | 0.0761148  | C  | 2.1706008  | 2.3774153  | 4.3510039  |
| C | 3.4963477  | 3.6736219  | -0.4748415 | C  | 5.8487462  | 1.0888699  | 2.2469277  |
| H | 3.8782504  | 4.4566987  | 0.1979045  | C  | 1.2631635  | 0.9577096  | 6.2366987  |
| C | 3.6131853  | 3.8565600  | -1.8801348 | H  | 1.9175983  | 0.1037167  | 5.9639843  |
| C | 4.1780555  | 5.0491944  | -2.4236734 | C  | 3.1426380  | 1.5682787  | 3.7397337  |
| C | 3.1026971  | 2.8429860  | -2.7703149 | C  | 1.2550682  | 5.7451275  | 1.5709374  |
| C | 3.1079626  | 3.1206500  | -4.1713362 | H  | 3.6427384  | 3.5368992  | 6.4080221  |
| C | 2.5731150  | 1.6180586  | -2.2129184 | C  | 1.4232772  | 3.2391437  | 3.5313553  |
| C | 2.4249939  | 1.5404631  | -0.8182420 | C  | 3.1842182  | 2.5636520  | 6.6751090  |
| O | 0.0423453  | 0.4845617  | -1.9359770 | H  | 2.9571569  | 2.5745753  | 7.7612394  |
| O | 1.8933586  | 0.3916561  | -0.2277912 | H  | 0.6635277  | 3.8864749  | 4.0007992  |
| P | 0.3070578  | 0.0263069  | -0.3761903 | C  | 4.1512451  | -0.8024789 | 2.0348243  |
| O | 0.1989278  | -1.4955585 | -0.1897359 | H  | 6.6274877  | 0.4540074  | 1.7754468  |
| O | -0.6433567 | 0.9292483  | 0.4182286  | H  | 6.0711565  | 2.1471572  | 2.0004138  |
| C | 4.5152909  | -1.1984104 | -6.2360698 | C  | 3.3736161  | 1.5941516  | 2.3549513  |
| C | 5.1011659  | -0.2945410 | -5.3113407 | C  | -0.7275466 | 4.1637899  | 1.5567746  |
| H | 2.7293037  | -2.2918869 | -6.7841208 | C  | 1.6165005  | 3.3100503  | 2.1380850  |
| H | 5.1216708  | -1.6201052 | -7.0519998 | H  | 2.3339210  | 5.8710087  | 1.3488795  |
| H | 4.8110652  | 0.9492291  | -3.5725084 | H  | 1.1004144  | 6.0342246  | 2.6317132  |
| H | 6.1653890  | -0.0298523 | -5.4047044 | C  | 4.4449439  | 0.6832759  | 1.7614582  |
| C | 3.6439414  | 4.3004250  | -4.6684082 | C  | 2.6097784  | 2.4790142  | 1.5493288  |
| C | 4.2035955  | 5.2673003  | -3.7920269 | C  | 0.7850134  | 4.2995290  | 1.3189293  |
| H | 2.6672701  | 2.3924307  | -4.8651467 | H  | 3.1382693  | -1.0768702 | 1.6857489  |
| H | 3.6269957  | 4.4897245  | -5.7525843 | H  | -1.0820373 | 3.1491841  | 1.2994393  |
| H | 4.6349401  | 6.1945979  | -4.1986766 | H  | 4.2039026  | -1.0344168 | 3.1190488  |
| H | 4.5756867  | 5.8043608  | -1.7275766 | H  | 0.2966473  | 0.8165807  | 5.7131500  |
| C | -0.9049790 | -3.0120785 | -2.6849409 | H  | -1.0101770 | 4.3818458  | 2.6081450  |
| C | -0.9580822 | -1.6996278 | -3.2343505 | H  | 3.9473559  | 1.7760233  | 6.5046831  |
| C | -2.0091198 | -3.4727756 | -1.9208684 | H  | 4.4331803  | 0.8228398  | 0.6610515  |
| C | -2.1372503 | -0.9147952 | -3.0865563 | H  | 0.9580241  | 4.0746586  | 0.2469270  |
| C | -3.2111050 | -1.4162583 | -2.3305131 | Zn | -1.2834409 | -2.6994005 | 0.3086109  |
| C | -3.1788380 | -2.6867043 | -1.7295178 | Br | -1.2357660 | -4.8297223 | 1.3290646  |
| H | -2.0034835 | -4.5129278 | -1.5564505 | H  | 3.7333206  | 0.8752217  | 4.3593895  |
| C | -2.2912459 | 0.4342454  | -3.7819921 | H  | -2.7022600 | -3.1604538 | 2.5834368  |
| H | -4.1065027 | -0.7916628 | -2.2138193 |    |            |            |            |
| C | -2.8398132 | 1.5371893  | -2.8638088 |    |            |            |            |
| H | -3.8873976 | 1.3469079  | -2.5527043 |    |            |            |            |
| H | -2.8306414 | 2.5126125  | -3.3908264 |    |            |            |            |
| H | -2.2305010 | 1.6405027  | -1.9462050 |    |            |            |            |
| C | -3.1627879 | 0.2599598  | -5.0427021 |    |            |            |            |
| H | -1.2860182 | 0.7519177  | -4.1258154 |    |            |            |            |
| H | -4.1893201 | -0.0668931 | -4.7752384 |    |            |            |            |
| H | -2.7357569 | -0.4981376 | -5.7300940 |    |            |            |            |
| H | -3.2454194 | 1.2188412  | -5.5945184 |    |            |            |            |
| C | -4.3745410 | -3.2555978 | -0.9705402 |    |            |            |            |
| C | -5.4330254 | -2.2056185 | -0.6204216 |    |            |            |            |
| H | -6.2055546 | -2.6453495 | 0.0392206  |    |            |            |            |
| H | -5.9468683 | -1.8274440 | -1.5288398 |    |            |            |            |
| H | -4.9946144 | -1.3417699 | -0.0842929 |    |            |            |            |
| C | -4.9979905 | -4.4295344 | -1.7521542 |    |            |            |            |
| H | -3.9771717 | -3.6741828 | -0.0173962 |    |            |            |            |
| H | -5.8338680 | -4.8749573 | -1.1752887 |    |            |            |            |

### 7.2.2.3 to 15c-mi

#### int1-8-c

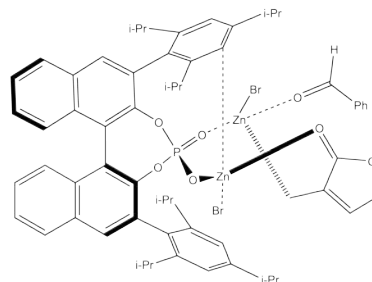

Energy(Hartree)= -11970.02787435

|    |            |            |            |   |            |            |            |
|----|------------|------------|------------|---|------------|------------|------------|
| P  | 0.2229853  | -0.4309977 | 0.0407586  | C | 5.0322564  | 1.7092758  | 4.3291160  |
| O  | 1.7599986  | -0.4695488 | -0.0095453 | C | 0.4682252  | -1.5116605 | 6.3648047  |
| O  | -0.5058065 | 0.8945046  | -0.1191248 | C | 4.0072093  | -4.4403758 | 1.7544854  |
| O  | -0.3369286 | -1.1513022 | 1.4238420  | H | -1.2907241 | 7.2842466  | -5.0950070 |
| O  | -0.2548248 | -1.5364296 | -1.0818172 | H | -0.5232202 | 5.5033234  | -3.4834451 |
| C  | -1.5843555 | -1.9423543 | -1.1074239 | H | -3.6388153 | 6.6721220  | -0.7031060 |
| C  | -2.0474185 | -2.8318868 | -0.1293702 | H | -4.4128779 | 8.4496189  | -2.3054465 |
| C  | -3.4417443 | -3.2069658 | -0.1568445 | H | -3.2367446 | 8.7446135  | -4.4964139 |
| C  | -4.2451633 | -2.8199397 | -1.2900475 | H | 2.5299718  | 4.8400650  | 4.6950288  |
| C  | -3.6826942 | -1.9790192 | -2.2913103 | H | 0.7554094  | 4.6508987  | 4.3972091  |
| C  | -2.3946278 | -1.4655709 | -2.1865761 | H | 2.6130695  | 2.6711540  | -0.0114279 |
| C  | -5.6094228 | -3.2344620 | -1.3532171 | H | 2.0412727  | 4.3694634  | -0.2587355 |
| C  | -6.1815498 | -3.9643456 | -0.3226853 | H | 1.8321434  | 5.8585326  | 2.2227911  |
| C  | -5.4082977 | -4.2947574 | 0.8217438  | H | -4.3141456 | -1.6701140 | -3.1381107 |
| C  | -4.0723149 | -3.9268883 | 0.9017378  | H | 1.4035523  | -4.7390777 | 3.6070154  |
| C  | -1.0991228 | -3.3802215 | 0.8756776  | H | -6.2064482 | -2.9410116 | -2.2310424 |
| C  | -0.9858842 | -4.8051911 | 1.1000978  | H | -7.2374317 | -4.2698222 | -0.3794412 |
| C  | -0.1313899 | -5.2831388 | 2.1593274  | H | -3.4878985 | -4.1818242 | 1.7965831  |
| C  | 0.7051811  | -4.3599337 | 2.8452606  | H | -5.8728852 | -4.8416428 | 1.6563540  |
| C  | 0.7322519  | -3.0119115 | 2.5126890  | H | -2.2641328 | -5.4442301 | -0.5540456 |
| C  | -0.2377755 | -2.5277537 | 1.5809851  | H | -2.0875496 | -7.8586425 | -0.0586255 |
| C  | -1.6612749 | -5.7774207 | 0.3009126  | H | -0.7131232 | -8.6698741 | 1.8883055  |
| C  | -1.5594960 | -7.1333208 | 0.5789976  | H | 0.5784988  | -7.0234889 | 3.2610481  |
| C  | -0.7760440 | -7.5929043 | 1.6703523  | H | -2.4357400 | 2.9751916  | -3.6505851 |
| C  | -0.0679035 | -6.6814353 | 2.4374202  | H | 0.6601340  | 0.4119572  | -5.2145744 |
| C  | -1.8923850 | -0.3633050 | -3.0598925 | H | 1.9583854  | -1.2879675 | -4.5628278 |
| C  | -2.5245931 | 0.9131974  | -2.9863401 | H | 1.8251120  | -2.9360396 | -3.8897577 |
| C  | -1.9655303 | 1.9802988  | -3.7133957 | H | 1.6446563  | -1.5150060 | -2.8096851 |
| C  | -0.8138943 | 1.8328422  | -4.5023585 | H | -0.5574301 | -2.6145448 | -3.3506909 |
| C  | -0.2322506 | 0.5563463  | -4.5856275 | H | -0.0042547 | -1.8105240 | -6.2769592 |
| C  | -0.7468121 | -0.5458575 | -3.8833139 | H | -1.5244899 | -2.5162759 | -5.6487443 |
| C  | 1.8408612  | -2.1330161 | 3.0023891  | H | -0.0083462 | -3.4794262 | -5.6210709 |
| C  | 1.6979092  | -1.3157996 | 4.1504275  | H | 1.5105522  | 4.4057682  | -4.8570883 |
| C  | 2.8120978  | -0.5874692 | 4.6158107  | H | 1.8660046  | 2.6918173  | -4.4742776 |
| C  | 4.0457808  | -0.5991693 | 3.9508850  | H | 0.8584759  | 3.6514868  | -3.3533881 |
| C  | 4.1517624  | -1.3736526 | 2.7690534  | H | -0.9236161 | 3.8638015  | -5.1228505 |
| C  | 3.0827410  | -2.1786605 | 2.2959099  | H | 0.5019500  | 3.7230592  | -7.1543760 |
| Zn | -0.0255019 | 2.8179302  | 0.2660505  | H | -0.8016414 | 2.4892484  | -7.2270828 |
| O  | 2.1054901  | 1.3524349  | 2.4911786  | H | 0.8759324  | 2.0093136  | -6.8240227 |
| C  | 2.0360098  | 2.5713643  | 2.7349144  | H | -4.6054364 | 2.4322284  | -0.5902341 |
| C  | 2.0352460  | 3.7025377  | 1.7872947  | H | -3.6097127 | 3.3220914  | -1.7707457 |
| C  | 1.9198381  | 4.8208270  | 2.5701105  | H | -2.8284438 | 2.2691970  | -0.5320635 |
| C  | 1.7702292  | 4.4225340  | 3.9981066  | H | -3.9648272 | 0.2766872  | -1.5296139 |
| O  | 1.9118262  | 2.9861731  | 4.0040574  | H | -5.9482299 | 1.4221082  | -2.5145394 |
| C  | 1.9194581  | 3.4556244  | 0.3524428  | H | -5.1308915 | 0.4242477  | -3.7643935 |
| Zn | 3.1540628  | 0.2382745  | 1.1839247  | H | -4.9106394 | 2.1959950  | -3.7564767 |
| Br | 5.1485986  | 1.1310453  | 0.3771960  | H | 6.1021571  | -0.0767273 | 3.8019479  |
| C  | -3.7939976 | 1.1636845  | -2.1695813 | H | 1.0946412  | -0.7676860 | 6.8998576  |
| C  | -5.0132967 | 1.3052992  | -3.1012530 | H | 4.1263811  | -5.2174434 | 0.9721442  |
| C  | -0.1008559 | -1.9161390 | -4.0806791 | H | -1.2601673 | 0.2623833  | 5.1146280  |
| C  | -0.4291674 | -2.4614517 | -5.4842370 | H | 5.9206188  | 2.2569358  | 4.7054480  |
| C  | -0.1824810 | 3.0361523  | -5.1889781 | H | 4.3127398  | -3.4516744 | -0.7583089 |
| C  | 0.1106482  | 2.7998348  | -6.6790012 | H | 4.1485676  | 2.0445752  | 4.9089237  |
| C  | 5.2454916  | 0.1903184  | 4.4579786  | H | 5.7804183  | -1.3019834 | 5.9874297  |
| C  | 5.6109943  | -0.2099360 | 5.8980964  | H | 6.5348727  | 0.3102693  | 6.2240632  |
| C  | 0.3571864  | -1.1917474 | 4.8642657  | H | 5.1296187  | -1.4305863 | 2.2660826  |
| C  | -0.2695151 | 0.1953189  | 4.6202044  | H | -0.5348892 | -1.4931994 | 6.8374214  |
| C  | 3.3371626  | -3.1811587 | 1.1647732  | H | 0.9114657  | -2.5136000 | 6.5377554  |
| C  | 4.1682464  | -2.6449995 | -0.0113327 | H | 3.4169495  | -4.8787512 | 2.5818192  |
| Br | -1.5058635 | 3.4001857  | 2.0869104  | H | 5.0149140  | -4.1973762 | 2.1514091  |
| O  | -0.7628442 | 4.0856776  | -1.3195865 | H | -0.4147380 | 0.3933323  | 3.5413609  |
| C  | -1.6322020 | 4.9340279  | -1.0668306 | H | 3.6600658  | -1.8095217 | -0.5295333 |
| C  | -2.0407578 | 5.9804688  | -2.0089522 | H | 0.3703525  | 1.0061887  | 5.0241633  |
| C  | -1.3762103 | 6.1542963  | -3.2459286 | H | 4.8833763  | 1.9961208  | 3.2689185  |
| C  | -1.8059251 | 7.1456925  | -4.1324062 | H | 5.1771066  | -2.3008889 | 0.2944071  |
| C  | -2.8993341 | 7.9669413  | -3.7938096 | H | 4.8068130  | 0.0654388  | 6.6119970  |
| C  | -3.5609048 | 7.8032257  | -2.5642473 | H | -0.3211513 | -1.9476665 | 4.4156003  |
| C  | -3.1303627 | 6.8148388  | -1.6700949 | H | 2.3497209  | -3.4773315 | 0.7568485  |
| C  | 1.4150258  | -1.9074244 | -3.8190753 | H | 2.6941519  | 0.0379484  | 5.5137077  |
| C  | 1.0824521  | 3.4762965  | -4.4250496 | H | -2.1432769 | 4.9094754  | -0.0680638 |
| C  | -3.6927394 | 2.3632302  | -1.2168096 |   |            |            |            |

## 7.2.2.4 to 15s-mi

### TS1-8-s; COSMO

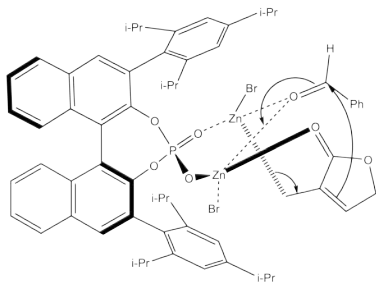

Energy(Hartree)= -11970.02327126

|    |            |            |            |
|----|------------|------------|------------|
| C  | -6.0581237 | -4.6793533 | -1.6129860 |
| C  | -1.8588357 | -4.0849209 | -0.9672620 |
| C  | -5.5631857 | -3.3829289 | -1.3982374 |
| C  | -3.8105164 | -5.5773982 | -1.3939884 |
| C  | -3.3051537 | -4.2744958 | -1.1572674 |
| C  | -5.1756313 | -5.7776413 | -1.6171577 |
| C  | -4.1941985 | -3.1768386 | -1.1776277 |
| O  | -1.3488746 | -2.8791398 | -0.8316654 |
| H  | -7.1334331 | -4.8377876 | -1.7870692 |
| H  | -3.1196539 | -6.4357268 | -1.4038329 |
| H  | -6.2428611 | -2.5179025 | -1.4054192 |
| H  | -5.5588118 | -6.7927616 | -1.8012432 |
| H  | -3.8120456 | -2.1561616 | -1.0354615 |
| Br | -3.7432208 | -0.3881120 | 1.1181438  |
| Zn | -1.7866558 | -1.6122492 | 0.7993314  |
| H  | -0.3743902 | -7.0779918 | 1.3003794  |
| H  | -0.4612925 | -2.4281604 | 2.7414787  |
| C  | -1.5256560 | -5.2426598 | 0.9569729  |
| C  | -0.4919095 | -6.2622629 | 0.5534242  |
| H  | -2.5497025 | -5.5383135 | 1.2249225  |
| C  | -0.8311758 | -4.1736235 | 1.5584465  |
| C  | -1.2501696 | -3.0711093 | 2.3099241  |
| C  | 0.5243328  | -4.2568429 | 0.9240972  |
| O  | 0.7449974  | -5.5102470 | 0.4867026  |
| O  | 1.3026170  | -3.3333607 | 0.6660631  |
| H  | -0.6332210 | -6.7259614 | -0.4452952 |
| H  | -2.2006627 | -3.1463420 | 2.8632424  |
| C  | 0.7696705  | 2.3065697  | -1.5414365 |
| C  | 1.9706505  | 2.9161794  | -1.1610156 |
| C  | 2.6999128  | 3.6270000  | -2.1835009 |
| C  | 4.0230011  | 4.1205935  | -1.9787589 |
| C  | 2.0855859  | 3.8232565  | -3.4761398 |
| C  | 2.7979949  | 4.5458988  | -4.4796673 |
| C  | 0.7856336  | 3.2938922  | -3.7323241 |
| H  | 0.3029197  | 3.5117309  | -4.6970782 |
| C  | 0.1234885  | 2.5067117  | -2.7994310 |
| C  | 2.7702646  | 1.4920401  | 2.3286007  |
| C  | 3.1468687  | 2.6397035  | 3.0150960  |
| H  | 3.4243866  | 2.5647473  | 4.0776951  |
| C  | 3.1104688  | 3.9257988  | 2.4025110  |
| C  | 3.4234586  | 5.0998902  | 3.1518182  |
| C  | 2.6800163  | 4.0568666  | 1.0289834  |
| C  | 2.5050419  | 5.3734660  | 0.5047691  |
| C  | 2.4089182  | 2.8591996  | 0.2651136  |
| C  | 2.4629452  | 1.6370501  | 0.9418595  |
| O  | 0.0843251  | 1.5094415  | -0.6277583 |
| O  | 2.2354186  | 0.4625737  | 0.2318346  |
| P  | 0.7283464  | 0.0575850  | -0.2391336 |
| O  | 0.9504691  | -0.8442908 | -1.4736925 |
| O  | -0.1370756 | -0.5041481 | 0.8839261  |
| C  | 4.0757630  | 5.0302140  | -4.2410063 |
| C  | 4.6957961  | 4.8024537  | -2.9835490 |
| H  | 2.3153835  | 4.6992316  | -5.4577486 |
| H  | 4.6156585  | 5.5786295  | -5.0278880 |
| H  | 4.5135890  | 3.9430705  | -1.0111355 |
| H  | 5.7198708  | 5.1643985  | -2.8050919 |

|   |            |            |            |
|---|------------|------------|------------|
| C | 2.7996209  | 6.4959561  | 1.2670227  |
| C | 3.2817662  | 6.3622428  | 2.5959649  |
| H | 2.1217119  | 5.4982329  | -0.5166143 |
| H | 2.6507827  | 7.4982989  | 0.8371850  |
| H | 3.5207485  | 7.2590237  | 3.1876357  |
| H | 3.7623537  | 4.9813647  | 4.1930479  |
| C | -1.4406850 | 0.7341669  | -3.7395571 |
| C | -1.2488034 | 1.9320493  | -2.9962435 |
| C | -2.7378701 | 0.1971867  | -3.8278532 |
| C | -2.3524155 | 2.5499808  | -2.3475049 |
| C | -3.6294553 | 1.9710138  | -2.4710229 |
| C | -3.8473289 | 0.7929548  | -3.2017143 |
| H | -2.8952523 | -0.7363980 | -4.3904580 |
| C | -2.1956941 | 3.8014244  | -1.4848370 |
| H | -4.4744127 | 2.4497193  | -1.9538456 |
| C | -2.5269455 | 3.5092938  | -0.0085426 |
| H | -3.5938349 | 3.2321733  | 0.1202515  |
| H | -2.3316969 | 4.4037376  | 0.6190429  |
| H | -1.9203685 | 2.6682679  | 0.3794352  |
| C | -3.0262869 | 4.9765363  | -2.0314037 |
| H | -1.1321452 | 4.1138143  | -1.5294129 |
| H | -4.1141695 | 4.7582104  | -1.9961864 |
| H | -2.7630798 | 5.2016323  | -3.0850684 |
| H | -2.8520226 | 5.8924388  | -1.4294548 |
| C | -5.2308937 | 0.1721507  | -3.3610215 |
| C | -6.1354373 | 0.3528738  | -2.1337535 |
| H | -7.0743421 | -0.2258599 | -2.2559380 |
| H | -6.4310887 | 1.4137799  | -1.9943732 |
| H | -5.6322313 | 0.0212524  | -1.2026202 |
| C | -5.9122160 | 0.7045390  | -4.6373672 |
| H | -5.0703986 | -0.9208967 | -3.5013279 |
| H | -6.8956934 | 0.2158387  | -4.7998737 |
| H | -5.2856559 | 0.5268628  | -5.5346577 |
| H | -6.0827455 | 1.7990155  | -4.5594939 |
| C | -0.2747192 | 0.0182310  | -4.4178397 |
| C | -0.4249275 | -1.5108408 | -4.4049011 |
| H | 0.5360988  | -2.0070256 | -4.6447094 |
| H | -1.1697950 | -1.8663627 | -5.1471366 |
| H | -0.7623481 | -1.8745028 | -3.4132966 |
| C | -0.0676952 | 0.5182640  | -5.8606032 |
| H | 0.6378614  | 0.2626050  | -3.8352765 |
| H | 0.7885009  | -0.0020639 | -6.3380651 |
| H | 0.1338787  | 1.6064011  | -5.8965741 |
| H | -0.9720501 | 0.3239407  | -6.4748433 |
| H | 0.6662556  | -3.7421580 | 5.0417119  |
| H | 6.0164486  | -1.9591919 | 3.0970256  |
| H | -0.0128407 | 2.5670143  | 5.7631502  |
| C | 1.7735166  | -3.6598535 | 4.9536466  |
| H | 5.4425282  | -1.6760018 | -0.0166573 |
| H | 1.9397437  | -5.8272460 | 4.7373663  |
| H | -1.6882281 | 1.6171647  | 4.0925898  |
| C | 2.0508273  | -2.3462430 | 4.2288395  |
| C | 5.9327072  | -0.9553555 | 2.6301588  |
| C | 2.2721164  | -4.9080367 | 4.2136476  |
| H | 3.3804576  | -4.9440585 | 4.1683467  |
| C | 3.1404262  | -2.1691508 | 3.3618969  |
| C | 0.6651606  | 1.7102551  | 5.5689015  |
| H | 1.9510266  | -2.7383703 | 6.9466353  |
| C | 1.2132928  | -1.2394897 | 4.4606044  |
| C | 2.3467585  | -3.6078561 | 6.3843343  |
| H | 2.0961142  | -4.5290754 | 6.9505439  |
| H | 0.3472591  | -1.3653393 | 5.1316451  |
| C | 4.5729928  | -1.8193862 | 0.6575340  |
| H | 6.8163271  | -0.8159433 | 1.9733129  |
| H | 5.9854650  | -0.2025789 | 3.4429140  |
| C | 3.4093132  | -0.9346880 | 2.7404014  |
| C | -1.0207251 | 0.7455526  | 3.9339658  |
| C | 1.4291702  | 0.0131851  | 3.8597081  |
| H | 1.7077387  | 2.0572134  | 5.7175881  |
| H | 0.4608342  | 0.9354669  | 6.3377844  |
| C | 4.6262808  | -0.8187313 | 1.8255975  |

|    |            |            |            |
|----|------------|------------|------------|
| C  | 2.5568112  | 0.1702324  | 3.0006955  |
| C  | 0.4475173  | 1.1500599  | 4.1502697  |
| H  | 3.6498429  | -1.6851263 | 0.0624407  |
| H  | -1.1889886 | 0.3809989  | 2.9035635  |
| H  | 4.5949933  | -2.8702096 | 1.0127622  |
| H  | 1.8976234  | -4.9539893 | 3.1716527  |
| H  | -1.3474986 | -0.0461724 | 4.6403921  |
| H  | 3.4524740  | -3.5123072 | 6.3556523  |
| H  | 4.6222818  | 0.2006088  | 1.3877236  |
| H  | 0.6599386  | 1.9685760  | 3.4334576  |
| Zn | 0.7072353  | -2.7495407 | -1.4021837 |
| Br | 1.2835818  | -4.5212443 | -2.7649682 |
| H  | 3.8061462  | -3.0185910 | 3.1489201  |
| H  | -1.2003463 | -4.8220163 | -1.4731002 |

### TS1-8-s

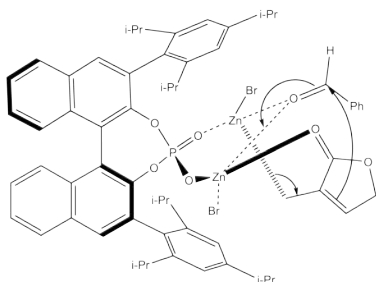

Energy(Hartree)= -11970.01143174  
number of imaginary frequencies: 1

|    |            |            |            |
|----|------------|------------|------------|
| C  | -6.0711619 | -4.6705510 | -1.6174712 |
| C  | -1.8735502 | -4.0774339 | -0.9594748 |
| C  | -5.5766539 | -3.3747965 | -1.4005004 |
| C  | -3.8250646 | -5.5685607 | -1.3931121 |
| C  | -3.3198177 | -4.2662894 | -1.1539986 |
| C  | -5.1892454 | -5.7688201 | -1.6200452 |
| C  | -4.2085230 | -3.1688026 | -1.1759875 |
| O  | -1.3625966 | -2.8736049 | -0.8228517 |
| H  | -7.1460090 | -4.8287121 | -1.7946396 |
| H  | -3.1337344 | -6.4266517 | -1.4026317 |
| H  | -6.2554148 | -2.5092145 | -1.4083291 |
| H  | -5.5720601 | -6.7837436 | -1.8061121 |
| H  | -3.8270586 | -2.1482490 | -1.0307260 |
| Br | -3.7592108 | -0.3761808 | 1.1093375  |
| Zn | -1.8031728 | -1.5994931 | 0.8019468  |
| H  | -0.3957983 | -7.0629222 | 1.3249706  |
| H  | -0.4933755 | -2.4093203 | 2.7573667  |
| C  | -1.5472569 | -5.2275956 | 0.9706237  |
| C  | -0.5078171 | -6.2465329 | 0.5769757  |
| H  | -2.5735312 | -5.5237007 | 1.2297605  |
| C  | -0.8579869 | -4.1578140 | 1.5777174  |
| C  | -1.2800292 | -3.0533420 | 2.3232200  |
| C  | 0.5035775  | -4.2410280 | 0.9551006  |
| O  | 0.7281026  | -5.4960705 | 0.5208468  |
| O  | 1.2825706  | -3.3184413 | 0.7043279  |
| H  | -0.6397165 | -6.7098665 | -0.4235865 |
| H  | -2.2354221 | -3.1230655 | 2.8686198  |
| C  | 0.7670533  | 2.3065837  | -1.5409182 |
| C  | 1.9671969  | 2.9160763  | -1.1582317 |
| C  | 2.6989487  | 3.6258857  | -2.1795393 |
| C  | 4.0210947  | 4.1201364  | -1.9719067 |
| C  | 2.0880716  | 3.8208198  | -3.4738301 |
| C  | 2.8031472  | 4.5426793  | -4.4755011 |
| C  | 0.7890021  | 3.2909614  | -3.7324133 |
| H  | 0.3083549  | 3.5071800  | -4.6985496 |
| C  | 0.1241745  | 2.5050421  | -2.8007038 |
| C  | 2.7635943  | 1.4913122  | 2.3317867  |

|   |            |            |            |
|---|------------|------------|------------|
| C | 3.1400215  | 2.6386960  | 3.0183875  |
| H | 3.4175000  | 2.5628302  | 4.0809202  |
| C | 3.1040983  | 3.9249018  | 2.4064450  |
| C | 3.4169719  | 5.0988819  | 3.1552365  |
| C | 2.6745784  | 4.0561447  | 1.0328130  |
| C | 2.5007362  | 5.3726069  | 0.5084723  |
| C | 2.4029481  | 2.8589139  | 0.2685688  |
| C | 2.4553650  | 1.6366122  | 0.9452979  |
| O | 0.0790215  | 1.5112059  | -0.6284955 |
| O | 2.2262552  | 0.4621813  | 0.2369720  |
| P | 0.7193367  | 0.0588721  | -0.2357706 |
| O | 0.9414293  | -0.8474442 | -1.4666493 |
| O | -0.1504652 | -0.4958195 | 0.8881668  |
| C | 4.0796614  | 5.0276512  | -4.2341105 |
| C | 4.6961265  | 4.8012708  | -2.9752011 |
| H | 2.3232293  | 4.6947840  | -5.4550859 |
| H | 4.6213612  | 5.5755341  | -5.0200734 |
| H | 4.5087119  | 3.9435725  | -1.0027088 |
| H | 5.7195117  | 5.1637814  | -2.7942227 |
| C | 2.7954115  | 6.4946560  | 1.2706657  |
| C | 3.2764277  | 6.3609096  | 2.5994902  |
| H | 2.1183533  | 5.4970276  | -0.5132518 |
| H | 2.6474335  | 7.4969768  | 0.8405943  |
| H | 3.5154702  | 7.2575297  | 3.1913146  |
| H | 3.7549891  | 4.9803326  | 4.1967385  |
| C | -1.4361280 | 0.7310446  | -3.7434273 |
| C | -1.2471086 | 1.9295781  | -3.0006858 |
| C | -2.7329699 | 0.1943288  | -3.8350957 |
| C | -2.3523739 | 2.5479125  | -2.3556067 |
| C | -3.6286276 | 1.9687613  | -2.4824168 |
| C | -3.8441466 | 0.7905613  | -3.2129591 |
| H | -2.8885993 | -0.7397529 | -4.3973789 |
| C | -2.1984005 | 3.8003466  | -1.4939706 |
| H | -4.4749397 | 2.4474324  | -1.9675777 |
| C | -2.5347769 | 3.5107355  | -0.0183178 |
| H | -3.6019721 | 3.2341495  | 0.1080726  |
| H | -2.3411539 | 4.4058720  | 0.6086340  |
| H | -1.9300310 | 2.6702093  | 0.3732107  |
| C | -3.0265163 | 4.9747514  | -2.0456387 |
| H | -1.1346150 | 4.1124652  | -1.5355243 |
| H | -4.1145059 | 4.7568535  | -2.0144835 |
| H | -2.7594698 | 5.1980457  | -3.0985924 |
| H | -2.8547443 | 5.8916012  | -1.4444976 |
| C | -5.2274594 | 0.1704403  | -3.3768862 |
| C | -6.1364907 | 0.3529133  | -2.1531170 |
| H | -7.0758790 | -0.2245375 | -2.2784274 |
| H | -6.4320163 | 1.4140179  | -2.0160545 |
| H | -5.6375935 | 0.0226149  | -1.2192133 |
| C | -5.9033615 | 0.7022285  | -4.6562945 |
| H | -5.0671844 | -0.9229927 | -3.5153905 |
| H | -6.8867075 | 0.2145276  | -4.8227113 |
| H | -5.2732904 | 0.5237986  | -5.5507916 |
| H | -6.0729137 | 1.7968081  | -4.5801051 |
| C | -0.2677043 | 0.0135772  | -4.4161668 |
| C | -0.4181466 | -1.5154887 | -4.4013041 |
| H | 0.5432027  | -2.0130703 | -4.6364712 |
| H | -1.1602100 | -1.8722725 | -5.1457513 |
| H | -0.7591874 | -1.8775930 | -3.4105599 |
| C | -0.0550740 | 0.5108099  | -5.8589986 |
| H | 0.6428752  | 0.2583677  | -3.8306164 |
| H | 0.8028666  | -0.0103297 | -6.3322752 |
| H | 0.1468218  | 1.5987291  | -5.8963006 |
| H | -0.9569926 | 0.3157807  | -6.4764410 |
| H | 0.6976674  | -3.7618783 | 5.0387547  |
| H | 6.0294275  | -1.9430179 | 3.0810280  |
| H | -0.0105001 | 2.5428730  | 5.7814257  |
| C | 1.8041950  | -3.6716481 | 4.9472484  |
| H | 5.4435290  | -1.6543259 | -0.0308098 |
| H | 1.9853308  | -5.8378312 | 4.7275992  |
| H | -1.6898320 | 1.5924128  | 4.1148094  |
| C | 2.0702130  | -2.3548871 | 4.2238633  |

|    |            |            |            |
|----|------------|------------|------------|
| C  | 5.9384602  | -0.9385607 | 2.6170734  |
| C  | 2.3088625  | -4.9154525 | 4.2037908  |
| H  | 3.4171825  | -4.9436470 | 4.1551958  |
| C  | 3.1557146  | -2.1693342 | 3.3540827  |
| C  | 0.6699705  | 1.6895999  | 5.5810391  |
| H  | 1.9829840  | -2.7519372 | 6.9407809  |
| C  | 1.2271392  | -1.2538095 | 4.4611511  |
| C  | 2.3820271  | -3.6180761 | 6.3759858  |
| H  | 2.1400238  | -4.5416658 | 6.9421491  |
| H  | 0.3639788  | -1.3863702 | 5.1346878  |
| C  | 4.5771498  | -1.8042801 | 0.6457931  |
| H  | 6.8193963  | -0.7925603 | 1.9581431  |
| H  | 5.9895155  | -0.1880362 | 3.4318272  |
| C  | 3.4155760  | -0.9319676 | 2.7352789  |
| C  | -1.0196249 | 0.7241624  | 3.9507142  |
| C  | 1.4337755  | 0.0017816  | 3.8633174  |
| H  | 1.7117294  | 2.0401182  | 5.7263834  |
| H  | 0.4726088  | 0.9116149  | 6.3483814  |
| C  | 4.6289178  | -0.8070127 | 1.8168256  |
| C  | 2.5576187  | 0.1672371  | 3.0013927  |
| C  | 0.4481492  | 1.1332393  | 4.1615892  |
| H  | 3.6518991  | -1.6725685 | 0.0535808  |
| H  | -1.1916790 | 0.3625529  | 2.9200490  |
| H  | 4.6059886  | -2.8562448 | 0.9970518  |
| H  | 1.9322095  | -4.9629625 | 3.1627381  |
| H  | -1.3408057 | -0.0705637 | 4.6563672  |
| H  | 3.4867481  | -3.5145869 | 6.3433747  |
| H  | 4.6180639  | 0.2135386  | 1.3820253  |
| H  | 0.6541228  | 1.9549916  | 3.4465684  |
| Zn | 0.6954522  | -2.7517908 | -1.3899474 |
| Br | 1.2674928  | -4.5320150 | -2.7393732 |
| H  | 3.8255078  | -3.0143002 | 3.1363439  |
| H  | -1.2132918 | -4.8151385 | -1.4630699 |

|   |            |            |            |
|---|------------|------------|------------|
| O | 0.7396767  | 0.7687164  | 0.9257021  |
| O | 2.4402851  | 0.0892251  | -0.8442960 |
| P | 0.8395451  | 0.0669876  | -0.5541520 |
| O | 0.2630713  | 0.9661820  | -1.6811480 |
| O | 0.2442984  | -1.3314338 | -0.4625932 |
| C | 4.7476922  | 5.8017559  | 1.3336037  |
| C | 5.5209909  | 4.6256297  | 1.1406952  |
| H | 2.7571333  | 6.6160797  | 1.5883484  |
| H | 5.2432467  | 6.7836701  | 1.3747279  |
| H | 5.5200104  | 2.4780278  | 0.9348119  |
| H | 6.6123701  | 4.7027835  | 1.0202237  |
| C | 5.6681899  | 0.7485146  | 4.3290259  |
| C | 6.4165615  | -0.4495772 | 4.1832439  |
| H | 4.1638509  | 2.0491574  | 3.4952264  |
| H | 5.8197633  | 1.3839994  | 5.2148665  |
| H | 7.1555924  | -0.7320487 | 4.9484381  |
| H | 6.7496667  | -2.2186414 | 2.9798972  |
| C | -1.8073314 | 3.2490875  | 0.6371872  |
| C | -0.8403945 | 3.0107944  | 1.6459402  |
| C | -3.1724045 | 3.2018922  | 0.9813236  |
| C | -1.2524103 | 2.6883291  | 2.9700672  |
| C | -2.6270102 | 2.6372583  | 3.2562437  |
| C | -3.6055676 | 2.9012450  | 2.2824839  |
| H | -3.9309116 | 3.4041367  | 0.2078574  |
| C | -0.2425938 | 2.3521223  | 4.0670653  |
| H | -2.9444311 | 2.3746678  | 4.2774224  |
| C | -0.1697244 | 0.8284978  | 4.2900633  |
| H | -1.1365608 | 0.4381805  | 4.6705707  |
| H | 0.6196726  | 0.5791666  | 5.0297348  |
| H | 0.0455813  | 0.2919383  | 3.3456783  |
| C | -0.5163876 | 3.1017716  | 5.3815354  |
| H | 0.7566028  | 2.6806187  | 3.7145924  |
| H | -1.4717347 | 2.7850110  | 5.8494425  |
| H | -0.5657024 | 4.1981833  | 5.2211721  |
| H | 0.2892450  | 2.8975471  | 6.1164476  |
| C | -5.0893451 | 2.8494028  | 2.6244076  |
| C | -5.5252930 | 1.4366560  | 3.0539032  |
| H | -6.6224719 | 1.3939009  | 3.2164735  |
| H | -5.0333324 | 1.1398405  | 4.0035351  |
| H | -5.2473127 | 0.6763665  | 2.2967073  |
| C | -5.4688450 | 3.8997941  | 3.6834755  |
| H | -5.6411423 | 3.1080060  | 1.6924049  |
| H | -6.5611556 | 3.8874930  | 3.8795730  |
| H | -5.1872978 | 4.9218100  | 3.3584202  |
| H | -4.9547877 | 3.6997593  | 4.6467705  |
| C | -1.3952991 | 3.5726582  | -0.7960618 |
| C | -2.2487988 | 2.8246638  | -1.8336801 |
| H | -1.8076057 | 2.9110403  | -2.8488472 |
| H | -3.2850006 | 3.2134282  | -1.9096091 |
| H | -2.3619577 | 1.7544050  | -1.5414084 |
| C | -1.4188844 | 5.0884380  | -1.0645218 |
| H | -0.3515260 | 3.2226304  | -0.9260935 |
| H | -1.0963476 | 5.3137163  | -2.1022605 |
| H | -0.7405827 | 5.6256679  | -0.3721236 |
| H | -2.4401061 | 5.5005774  | -0.9241109 |
| H | 0.0328306  | -5.0164627 | -3.2468447 |
| H | 5.4054024  | -2.3742461 | -4.3371894 |
| C | 0.6283277  | -4.2432195 | -3.7761217 |
| H | 4.5667815  | 0.7353945  | -4.0371927 |
| H | -1.1901569 | -3.4237447 | -4.7009056 |
| H | 1.3882192  | -3.6191660 | 2.7836778  |
| C | 1.7084711  | -3.7530505 | -2.8246193 |
| C | 5.6990479  | -1.7727675 | -3.4512771 |
| C | -0.3318668 | -3.0779344 | -4.0909703 |
| H | 0.1821323  | -2.2675091 | -4.6493068 |
| C | 2.6407866  | -2.7840598 | -3.2359096 |
| C | 2.3565465  | -5.5405981 | 1.0763515  |
| H | 1.8637891  | -5.7203085 | -4.8344300 |
| C | 1.7409545  | -4.1677322 | -1.4835324 |
| C | 1.1851824  | -4.8733989 | -5.0621234 |
| H | 0.3593288  | -5.2554391 | -5.6965932 |

## 7.2.2.5 to 15q-mi

### TS1-8-q; COSMO

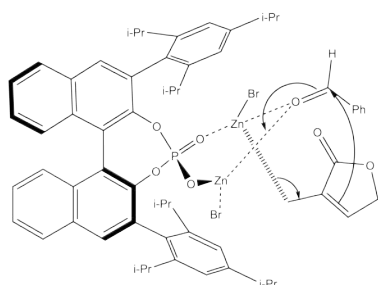

Energy(Hartree)= -11970.01081651

|   |           |            |           |
|---|-----------|------------|-----------|
| C | 1.4276588 | 1.9683887  | 1.1338989 |
| C | 2.8285751 | 1.9694684  | 1.1759038 |
| C | 3.4970944 | 3.2468458  | 1.2348224 |
| C | 4.9116491 | 3.3791338  | 1.0953997 |
| C | 2.7095468 | 4.4458325  | 1.3949890 |
| C | 3.3690216 | 5.7101731  | 1.4543057 |
| C | 1.2929302 | 4.3439006  | 1.5074793 |
| H | 0.7075472 | 5.2518605  | 1.7203519 |
| C | 0.6309259 | 3.1286486  | 1.3756131 |
| C | 3.9597435 | -1.5406447 | 0.0785405 |
| C | 4.9455766 | -1.8225649 | 1.0156088 |
| H | 5.4939746 | -2.7753579 | 0.9570777 |
| C | 5.2367500 | -0.9282982 | 2.0893171 |
| C | 6.1967891 | -1.2722700 | 3.0880841 |
| C | 4.5155000 | 0.3188295  | 2.2087226 |
| C | 4.7408718 | 1.1231062  | 3.3655560 |
| C | 3.5788603 | 0.6806154  | 1.1708324 |
| C | 3.3319725 | -0.2567354 | 0.1707144 |

|    |            |            |            |   |            |            |            |
|----|------------|------------|------------|---|------------|------------|------------|
| H  | 1.0479557  | -4.9623975 | -1.1661895 | C | 4.9132697  | 3.3750327  | 1.1134838  |
| C  | 3.8419829  | -0.0688946 | -3.7955393 | C | 2.7121811  | 4.4414526  | 1.4162987  |
| H  | 6.4493401  | -1.0241239 | -3.7808032 | C | 3.3726638  | 5.7046271  | 1.4778717  |
| H  | 6.1880427  | -2.4571879 | -2.7286077 | C | 1.2953823  | 4.3406654  | 1.5251887  |
| C  | 3.4841234  | -2.1343017 | -2.3226438 | H | 0.7091053  | 5.2486423  | 1.7354171  |
| C  | 1.3905172  | -3.2919986 | 1.7235175  | C | 0.6325141  | 3.1265894  | 1.3914561  |
| C  | 2.5748301  | -3.5602718 | -0.5247023 | C | 3.9603926  | -1.5374146 | 0.0719175  |
| C  | 4.4710360  | -1.0826568 | -2.8252158 | C | 4.9557845  | -1.8199143 | 0.9984885  |
| C  | 3.4044780  | -2.4799352 | -0.9439140 | H | 5.5085896  | -2.7692954 | 0.9267381  |
| C  | 2.4992582  | -4.0159007 | 0.9364276  | C | 5.2519162  | -0.9327496 | 2.0763105  |
| H  | 2.9413861  | 0.4002916  | -3.3528901 | C | 6.2211454  | -1.2787192 | 3.0647810  |
| H  | 1.5132123  | -2.1924087 | 1.7016645  | C | 4.5280558  | 0.3113124  | 2.2091040  |
| H  | 3.5489593  | -0.5417822 | -4.7558962 | C | 4.7624738  | 1.1103654  | 3.3674296  |
| H  | -0.7362122 | -2.6407921 | -3.1538817 | C | 3.5810974  | 0.6761643  | 1.1818727  |
| H  | 0.3908775  | -3.5187030 | 1.2964095  | C | 3.3272137  | -0.2571693 | 0.1793574  |
| H  | 1.7550062  | -4.1364472 | -5.6664961 | O | 0.7389921  | 0.7651981  | 0.9630653  |
| H  | 4.8355722  | -0.5146260 | -1.9439175 | O | 2.4221696  | 0.0891106  | -0.8224777 |
| H  | 3.4587805  | -3.7410362 | 1.4177526  | P | 0.8253050  | 0.0567996  | -0.5130309 |
| H  | 2.6738125  | -2.4864885 | -4.2955832 | O | 0.2267831  | 0.9457229  | -1.6362284 |
| Zn | -1.1112662 | 0.3553164  | -2.8497784 | O | 0.2432036  | -1.3463487 | -0.4043783 |
| Br | -1.6638749 | 0.5353465  | -5.0650362 | C | 4.7507829  | 5.7963048  | 1.3573056  |
| C  | -7.0583860 | 1.0513401  | -1.8262757 | C | 5.5230224  | 4.6207302  | 1.1616066  |
| C  | -3.4908000 | -1.1675932 | -2.4952240 | H | 2.7609792  | 6.6104607  | 1.6132489  |
| C  | -6.0303797 | 1.0873362  | -0.8620730 | H | 5.2464522  | 6.7780092  | 1.4004497  |
| C  | -5.7452760 | -0.4622985 | -3.1954854 | H | 5.5203436  | 2.4736167  | 0.9508359  |
| C  | -4.7067426 | -0.4303572 | -2.2263477 | H | 6.6143555  | 4.6973811  | 1.0408781  |
| C  | -6.9128028 | 0.2821513  | -2.9950973 | C | 5.6988623  | 0.7331678  | 4.3204318  |
| C  | -4.8527853 | 0.3625102  | -1.0565697 | C | 6.4481558  | -0.4620615 | 4.1622809  |
| O  | -2.3833199 | -0.9463963 | -1.8769500 | H | 4.1842514  | 2.0343623  | 3.5054914  |
| H  | -7.9790724 | 1.6328411  | -1.6652106 | H | 5.8569019  | 1.3647171  | 5.2078790  |
| H  | -5.6072985 | -1.0448319 | -4.1199893 | H | 7.1944610  | -0.7469896 | 4.9193672  |
| H  | -6.1551979 | 1.6885635  | 0.0503826  | H | 6.7758141  | -2.2228500 | 2.9466096  |
| H  | -7.7107524 | 0.2692761  | -3.7523580 | C | -1.7962800 | 3.2687425  | 0.6278470  |
| H  | -4.0508685 | 0.3677821  | -0.2999866 | C | -0.8417748 | 3.0093676  | 1.6437977  |
| Br | -2.6042107 | -0.8626116 | 1.7006735  | C | -3.1645976 | 3.2248384  | 0.9582482  |
| Zn | -1.5913385 | -2.0199943 | -0.0999200 | C | -1.2697219 | 2.6596043  | 2.9549919  |
| H  | -6.2800689 | -4.4830148 | -1.9114800 | C | -2.6472015 | 2.6120328  | 3.2262820  |
| H  | -1.3378213 | -4.5410701 | -0.9363776 | C | -3.6133860 | 2.9047457  | 2.2493644  |
| C  | -4.5781702 | -3.3535907 | -1.1699562 | H | -3.9135488 | 3.4447277  | 0.1802488  |
| C  | -5.4870926 | -3.7872367 | -2.2709342 | C | -0.2772928 | 2.2972431  | 4.0590302  |
| H  | -4.9097604 | -2.7804416 | -0.2921852 | H | -2.9758992 | 2.3297754  | 4.2387883  |
| C  | -3.3403640 | -3.9306596 | -1.3454339 | C | -0.2953011 | 0.7814300  | 4.3349260  |
| C  | -2.1588558 | -3.9362347 | -0.5109986 | H | -1.2807811 | 0.4581030  | 4.7297629  |
| C  | -3.3874824 | -4.6256478 | -2.6791982 | H | 0.4797618  | 0.5110088  | 5.0820976  |
| O  | -4.6501439 | -4.4829247 | -3.2065760 | H | -0.1128170 | 0.2023787  | 3.4088803  |
| O  | -2.5149531 | -5.2441449 | -3.2524087 | C | -0.5031554 | 3.1132260  | 5.3432169  |
| H  | -6.0045340 | -2.9523168 | -2.7937997 | H | 0.7390083  | 2.5522739  | 3.6952849  |
| H  | 3.1290010  | -6.0798634 | 0.4915562  | H | -1.4847793 | 2.8880967  | 5.8097116  |
| H  | 1.3629981  | -5.8987206 | 0.7350665  | H | -0.4685445 | 4.2033014  | 5.1419353  |
| H  | 2.4584349  | -5.8374333 | 2.1401679  | H | 0.2777656  | 2.8771023  | 6.0951299  |
| H  | -2.3756517 | -4.2139157 | 0.5408769  | C | -5.1004680 | 2.8682079  | 2.5786194  |
| H  | -3.4670757 | -1.8134862 | -3.4017226 | C | -5.5562776 | 1.4668307  | 3.0232653  |
|    |            |            |            | H | -6.6564423 | 1.4355346  | 3.1673246  |
|    |            |            |            | H | -5.0858945 | 1.1809554  | 3.9868481  |
|    |            |            |            | H | -5.2709633 | 0.6902308  | 2.2857138  |
|    |            |            |            | C | -5.4768925 | 3.9383307  | 3.6189869  |
|    |            |            |            | H | -5.6412425 | 3.1210320  | 1.6381157  |
|    |            |            |            | H | -6.5696947 | 3.9377264  | 3.8128914  |
|    |            |            |            | H | -5.1856629 | 4.9525930  | 3.2792776  |
|    |            |            |            | H | -4.9660672 | 3.7500413  | 4.5862149  |
|    |            |            |            | C | -1.3689957 | 3.6045294  | -0.7985932 |
|    |            |            |            | C | -2.2258591 | 2.8822279  | -1.8521909 |
|    |            |            |            | H | -1.7665222 | 2.9552020  | -2.8597848 |
|    |            |            |            | H | -3.2493088 | 3.3016842  | -1.9403003 |
|    |            |            |            | H | -2.3653436 | 1.8132544  | -1.5742201 |
|    |            |            |            | C | -1.3670271 | 5.1238027  | -1.0472820 |
|    |            |            |            | H | -0.3297931 | 3.2393265  | -0.9249061 |
|    |            |            |            | H | -1.0402060 | 5.3576677  | -2.0817941 |
|    |            |            |            | H | -0.6809632 | 5.6423268  | -0.3485785 |
|    |            |            |            | H | -2.3813232 | 5.5510803  | -0.9022059 |
|    |            |            |            | H | 0.0288058  | -5.0162269 | -3.2461096 |

### TS1-8-q

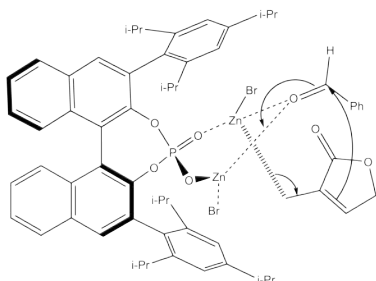

Energy(Hartree)= -11969.99820931  
number of imaginary frequencies: 1

|   |           |           |           |
|---|-----------|-----------|-----------|
| C | 1.4295146 | 1.9649616 | 1.1582289 |
| C | 2.8304315 | 1.9649917 | 1.1956006 |
| C | 3.4990858 | 3.2424556 | 1.2539609 |

|    |            |            |            |
|----|------------|------------|------------|
| H  | 5.3627391  | -2.3142526 | -4.3663486 |
| C  | 0.6229079  | -4.2437582 | -3.7782270 |
| H  | 4.5012742  | 0.7842691  | -4.0310006 |
| H  | -1.2027742 | -3.4388178 | -4.7000388 |
| H  | 1.4509131  | -3.6623788 | 2.7868983  |
| C  | 1.7021818  | -3.7458145 | -2.8299784 |
| C  | 5.6607534  | -1.7178807 | -3.4786579 |
| C  | -0.3408343 | -3.0840972 | -4.1008806 |
| H  | 0.1659395  | -2.2782849 | -4.6721944 |
| C  | 2.6175512  | -2.7605750 | -3.2398944 |
| C  | 2.3925899  | -5.5642887 | 1.0449906  |
| H  | 1.8626115  | -5.7235313 | -4.8267200 |
| C  | 1.7542509  | -4.1735426 | -1.4939788 |
| C  | 1.1825359  | -4.8796609 | -5.0601352 |
| H  | 0.3584103  | -5.2667218 | -5.6934176 |
| H  | 1.0756025  | -4.9811459 | -1.1787810 |
| C  | 3.7853384  | -0.0266485 | -3.7854743 |
| H  | 6.4013164  | -0.9603942 | -3.8098743 |
| H  | 6.1630545  | -2.4052187 | -2.7683132 |
| C  | 3.4628108  | -2.1104383 | -2.3292561 |
| C  | 1.4402311  | -3.3217251 | 1.7311111  |
| C  | 2.5908028  | -3.5665189 | -0.5375290 |
| C  | 4.4339627  | -1.0444547 | -2.8325744 |
| C  | 3.4026577  | -2.4717191 | -0.9535686 |
| C  | 2.5356310  | -4.0384869 | 0.9193747  |
| H  | 2.8888002  | 0.4344651  | -3.3267306 |
| H  | 1.5665567  | -2.2224618 | 1.7228551  |
| H  | 3.4820129  | -0.4923014 | -4.7461192 |
| H  | -0.7406931 | -2.6394025 | -3.1647775 |
| H  | 0.4344435  | -3.5388131 | 1.3141247  |
| H  | 1.7526426  | -4.1452587 | -5.6672833 |
| H  | 4.8035251  | -0.4815589 | -1.9500497 |
| H  | 3.5028103  | -3.7705914 | 1.3894077  |
| H  | 2.6371043  | -2.4531255 | -4.2970690 |
| Zn | -1.0675471 | 0.2801448  | -2.8609397 |
| Br | -1.6455275 | 0.5057521  | -5.0567043 |
| C  | -7.0396544 | 1.0336711  | -1.8501477 |
| C  | -3.4721292 | -1.1985513 | -2.4768373 |
| C  | -6.0113882 | 1.0882145  | -0.8878959 |
| C  | -5.7267426 | -0.5050782 | -3.1904231 |
| C  | -4.6882061 | -0.4554764 | -2.2224305 |
| C  | -6.8942164 | 0.2429375  | -3.0041391 |
| C  | -4.8332818 | 0.3605187  | -1.0691655 |
| O  | -2.3676594 | -0.9719663 | -1.8579532 |
| H  | -7.9603911 | 1.6182675  | -1.7004168 |
| H  | -5.5866514 | -1.1045733 | -4.1038632 |
| H  | -6.1334819 | 1.7053684  | 0.0141956  |
| H  | -7.6919218 | 0.2168508  | -3.7614423 |
| H  | -4.0309346 | 0.3802875  | -0.3133273 |
| Br | -2.6850097 | -0.9127076 | 1.7115163  |
| Zn | -1.5973993 | -2.0283760 | -0.0637673 |
| H  | -6.2811364 | -4.4913621 | -1.8159481 |
| H  | -1.3209913 | -4.5449680 | -0.9407173 |
| C  | -4.5687743 | -3.3632273 | -1.0924413 |
| C  | -5.4981469 | -3.7859983 | -2.1814303 |
| H  | -4.8765188 | -2.7947574 | -0.2026226 |
| C  | -3.3351688 | -3.9395490 | -1.2994510 |
| C  | -2.1381917 | -3.9534886 | -0.4908051 |
| C  | -3.4038849 | -4.6081012 | -2.6478969 |
| O  | -4.6812483 | -4.4594571 | -3.1464002 |
| O  | -2.5382867 | -5.2033161 | -3.2502965 |
| H  | -6.0318350 | -2.9430026 | -2.6758454 |
| H  | 3.1494210  | -6.0991431 | 0.4365197  |
| H  | 1.3907059  | -5.9164171 | 0.7225586  |
| H  | 2.5168148  | -5.8742753 | 2.1026071  |
| H  | -2.3302422 | -4.2374106 | 0.5639641  |
| H  | -3.4463994 | -1.8549230 | -3.3761436 |

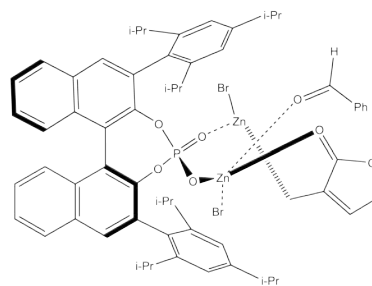

Energy(Hartree)=-11970.03578386

|    |            |            |            |
|----|------------|------------|------------|
| Zn | 2.1370786  | 2.3123032  | -1.3312866 |
| Br | 4.4138856  | 2.1796183  | -1.6198545 |
| C  | -2.5055911 | 2.6752869  | -0.4995100 |
| C  | -1.2222243 | 3.2207025  | -0.5657748 |
| C  | -0.9759017 | 4.3511971  | -1.3783923 |
| C  | -2.0426740 | 4.9554338  | -2.0863432 |
| C  | -3.3263792 | 4.3967693  | -2.0269926 |
| C  | -3.5550583 | 3.2525690  | -1.2413818 |
| H  | -2.6887987 | 1.7926116  | 0.1280881  |
| H  | -0.4034586 | 2.7806404  | 0.0165349  |
| C  | 0.3742073  | 4.8876830  | -1.5238434 |
| H  | -1.8507162 | 5.8475875  | -2.7040883 |
| H  | -4.1518827 | 4.8501282  | -2.5954559 |
| H  | -4.5536903 | 2.7912542  | -1.2043323 |
| O  | 1.4291318  | 4.3170866  | -1.2049768 |
| C  | -0.1284311 | 0.6255103  | -5.8199713 |
| C  | -0.5341088 | 1.2481608  | -4.6722908 |
| C  | 0.7129030  | 1.5765071  | -3.9493050 |
| O  | 1.7955837  | 1.1634352  | -4.6235694 |
| C  | 1.3591552  | 0.5219126  | -5.8390273 |
| O  | 0.7984158  | 2.1642682  | -2.8616227 |
| C  | -1.8446892 | 1.5114675  | -4.0731547 |
| H  | 1.7317469  | -0.5249228 | -5.8105862 |
| H  | 1.8511443  | 1.0381589  | -6.6927640 |
| Zn | -2.1474529 | 0.3516827  | -2.4451362 |
| Br | -3.9544419 | -0.6488966 | -1.3597768 |
| H  | -2.6753209 | 1.3640557  | -4.7893439 |
| H  | -1.8921208 | 2.5407431  | -3.6606232 |
| H  | -0.7727569 | 0.2174161  | -6.6100131 |
| C  | -0.5924742 | -0.4271106 | 2.3110164  |
| C  | -0.2621907 | -1.7635228 | 2.5751588  |
| C  | 0.0833297  | -2.1295786 | 3.9299416  |
| C  | 0.6208487  | -3.4071907 | 4.2747345  |
| C  | -0.0858383 | -1.1612200 | 4.9841151  |
| C  | 0.2177283  | -1.5256626 | 6.3298188  |
| C  | -0.5248842 | 0.1506464  | 4.6557690  |
| H  | -0.6760173 | 0.8800203  | 5.4664258  |
| C  | -0.7380596 | 0.5518786  | 3.3424868  |
| C  | 0.8005730  | -3.5273046 | -0.6579026 |
| C  | 0.2080134  | -4.7736841 | -0.4889345 |
| H  | 0.4078822  | -5.5665928 | -1.2250414 |
| C  | -0.6894204 | -5.0442018 | 0.5830810  |
| C  | -1.3683242 | -6.2955633 | 0.6814032  |
| C  | -0.9410842 | -4.0276387 | 1.5753845  |
| C  | -1.9083973 | -4.2948675 | 2.5892688  |
| C  | -0.2239591 | -2.7790674 | 1.4882182  |
| C  | 0.5557647  | -2.5500342 | 0.3534903  |
| O  | -0.8812435 | -0.0229546 | 1.0103928  |
| O  | 1.1925613  | -1.3196570 | 0.2201640  |
| P  | 0.2712402  | -0.0236381 | -0.1739717 |
| O  | 1.2052242  | 1.1873397  | -0.0022259 |
| O  | -0.4493424 | -0.2111026 | -1.5047536 |
| C  | 0.7083124  | -2.7859689 | 6.6328115  |
| C  | 0.9262138  | -3.7255051 | 5.5904910  |
| H  | 0.0694169  | -0.7755166 | 7.1225188  |
| H  | 0.9459280  | -3.0538373 | 7.6735435  |

7.2.2.6 to 15l-mi  
int1-8-l

|   |            |            |            |
|---|------------|------------|------------|
| H | 0.8068872  | -4.1431852 | 3.4810318  |
| H | 1.3476436  | -4.7147365 | 5.8256958  |
| C | -2.5661463 | -5.5155783 | 2.6451241  |
| C | -2.2855453 | -6.5318901 | 1.6936859  |
| H | -2.1394712 | -3.5128134 | 3.3259739  |
| H | -3.3165269 | -5.6942224 | 3.4302819  |
| H | -2.8086399 | -7.4984727 | 1.7524548  |
| H | -1.1604247 | -7.0664446 | -0.0773197 |
| C | -0.1657286 | 2.9741120  | 2.8947930  |
| C | -1.1510918 | 1.9606902  | 3.0458252  |
| C | -0.5968973 | 4.3014472  | 2.7040609  |
| C | -2.5344671 | 2.2816732  | 2.9899186  |
| C | -2.9084428 | 3.6249192  | 2.8040630  |
| C | -1.9575654 | 4.6510491  | 2.6649388  |
| H | 0.1540655  | 5.0987643  | 2.5879631  |
| C | -3.6041430 | 1.2133201  | 3.2206899  |
| H | -3.9802101 | 3.8769625  | 2.7740687  |
| C | -4.7580898 | 1.2517762  | 2.2062196  |
| H | -5.2930212 | 2.2243376  | 2.2137238  |
| H | -5.5039928 | 0.4677589  | 2.4489427  |
| H | -4.4083706 | 1.0504780  | 1.1741251  |
| C | -4.1286165 | 1.3063140  | 4.6673641  |
| H | -3.1152207 | 0.2231711  | 3.1127359  |
| H | -4.6263983 | 2.2823988  | 4.8470491  |
| H | -3.3042054 | 1.2113971  | 5.4025483  |
| H | -4.8664622 | 0.5035247  | 4.8735836  |
| C | -2.3828873 | 6.1062108  | 2.5094210  |
| C | -3.3130695 | 6.3201271  | 1.3041028  |
| H | -3.5608603 | 7.3949009  | 1.1819208  |
| H | -4.2702928 | 5.7717823  | 1.4266337  |
| H | -2.8463066 | 5.9628319  | 0.3655722  |
| C | -3.0181550 | 6.6373265  | 3.8079788  |
| H | -1.4558135 | 6.6934702  | 2.3258538  |
| H | -3.2747229 | 7.7131356  | 3.7152322  |
| H | -2.3315290 | 6.5184305  | 4.6699729  |
| H | -3.9527564 | 6.0877540  | 4.0468285  |
| C | 1.3260581  | 2.6487294  | 2.9818775  |
| C | 2.2016070  | 3.5228294  | 2.0716109  |
| H | 3.2193706  | 3.0936851  | 1.9808647  |
| H | 2.3131843  | 4.5554264  | 2.4634658  |
| H | 1.7805524  | 3.6005878  | 1.0527871  |
| C | 1.8312811  | 2.7392365  | 4.4357295  |
| H | 1.4494472  | 1.5995542  | 2.6412752  |
| H | 2.9125084  | 2.4956896  | 4.4871069  |
| H | 1.2957733  | 2.0405396  | 5.1062715  |
| H | 1.6924846  | 3.7662678  | 4.8338504  |
| H | 3.3872473  | -1.9624573 | -6.1644778 |
| H | 5.5214605  | -4.0000892 | -1.0463773 |
| H | -1.7440764 | -5.0193302 | -4.0921077 |
| C | 4.0780359  | -2.0838315 | -5.2982658 |
| H | 4.8412491  | -1.6897962 | 1.0741716  |
| H | 5.3251011  | -0.4274007 | -6.0168078 |
| H | -2.2250646 | -2.4604369 | -4.1880973 |
| C | 3.2212602  | -2.4642980 | -4.0969588 |
| C | 4.7118903  | -4.1321914 | -0.2983388 |
| C | 4.8130002  | -0.7474000 | -5.0858580 |
| H | 5.5900995  | -0.8357022 | -4.2991075 |
| C | 3.7752262  | -2.5114369 | -2.8069039 |
| C | -0.6609981 | -4.8104962 | -3.9708246 |
| H | 4.5278879  | -4.1651552 | -5.8580560 |
| C | 1.8614724  | -2.7894211 | -4.2369249 |
| C | 5.0606464  | -3.2134959 | -5.6596451 |
| H | 5.6543508  | -2.9528697 | -6.5604228 |
| H | 1.4132417  | -2.7730422 | -5.2447434 |
| C | 4.4152867  | -1.6252520 | 0.0517157  |
| H | 5.1884463  | -4.2231920 | 0.6997519  |
| H | 4.1995569  | -5.0895357 | -0.5242154 |
| C | 3.0207554  | -2.8694904 | -1.6781557 |
| C | -1.1230044 | -2.3407355 | -4.2223106 |
| C | 1.0490003  | -3.1292744 | -3.1370643 |
| H | -0.2277961 | -5.6113760 | -3.3397772 |

|   |            |            |            |
|---|------------|------------|------------|
| H | -0.1853497 | -4.8863967 | -4.9713721 |
| C | 3.7260825  | -2.9482298 | -0.3253465 |
| C | 1.6413422  | -3.1816255 | -1.8438912 |
| C | -0.4368036 | -3.4136145 | -3.3626525 |
| H | 3.7048393  | -0.7772890 | 0.0272593  |
| H | -0.8689065 | -1.3268982 | -3.8573212 |
| H | 5.2483678  | -1.3791817 | -0.6384056 |
| H | 4.1256965  | 0.0589169  | -4.7616231 |
| H | -0.8145287 | -2.3902860 | -5.2876091 |
| H | 5.7723725  | -3.3956162 | -4.8275780 |
| H | 2.9607937  | -3.1551156 | 0.4493818  |
| H | -0.9342317 | -3.3851340 | -2.3724826 |
| H | 4.8382839  | -2.2597806 | -2.6704873 |
| H | 0.4489472  | 5.9120948  | -1.9776416 |

### 7.2.2.7 to 15a-mi

#### TS1-8-a; woelfling data

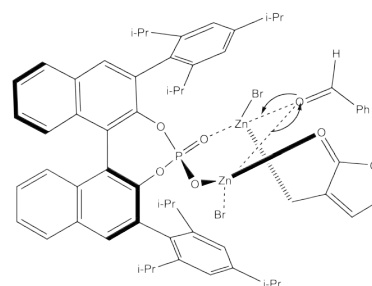

Energy(Hartree)= -11970.00175701

|    |           |           |           |
|----|-----------|-----------|-----------|
| Zn | 2.740375  | 1.305668  | -1.046451 |
| Br | 5.003620  | 1.544150  | -1.096621 |
| C  | -4.326392 | 3.573584  | -0.940975 |
| C  | -3.034302 | 3.278069  | -0.494227 |
| C  | -2.152702 | 4.312857  | -0.124022 |
| C  | -2.582802 | 5.655387  | -0.195708 |
| C  | -3.878462 | 5.954702  | -0.636277 |
| C  | -4.748403 | 4.913424  | -1.008852 |
| H  | -4.988127 | 2.745141  | -1.236823 |
| H  | -2.708350 | 2.233159  | -0.372918 |
| C  | -0.779887 | 3.980328  | 0.320079  |
| H  | -1.895531 | 6.464810  | 0.100858  |
| H  | -4.218110 | 7.000535  | -0.680546 |
| H  | -5.769620 | 5.148088  | -1.346646 |
| O  | -0.237270 | 2.902338  | 0.127089  |
| C  | -0.498284 | 4.696041  | -3.036693 |
| C  | -0.324230 | 3.350942  | -3.223387 |
| C  | 0.965725  | 3.038472  | -2.577679 |
| O  | 1.533483  | 4.134527  | -2.047047 |
| C  | 0.665455  | 5.259343  | -2.291843 |
| O  | 1.519967  | 1.929223  | -2.505986 |
| C  | -1.149233 | 2.302770  | -3.822584 |
| H  | 1.247937  | 6.021575  | -2.855206 |
| H  | 0.402749  | 5.705039  | -1.306121 |
| Zn | -2.004553 | 1.068061  | -2.467631 |
| Br | -4.094149 | 0.118363  | -1.986721 |
| H  | -0.514303 | 1.584154  | -4.381970 |
| H  | -1.933735 | 2.711700  | -4.486612 |
| H  | -1.360702 | 5.296516  | -3.354326 |
| C  | -0.448410 | -1.372691 | 2.050253  |
| C  | -0.293068 | -2.756844 | 1.872259  |
| C  | 0.111454  | -3.533637 | 3.025054  |
| C  | 0.496998  | -4.906526 | 2.940265  |
| C  | 0.178658  | -2.894507 | 4.318199  |
| C  | 0.543929  | -3.663464 | 5.463674  |



|   |           |           |           |
|---|-----------|-----------|-----------|
| C | -0.070671 | -1.497369 | 4.426979  |
| H | -0.023124 | -1.023916 | 5.419591  |
| C | -0.332867 | -0.711114 | 3.312830  |
| C | 0.397821  | -3.544071 | -1.830211 |
| C | -0.297041 | -4.735280 | -1.997098 |
| H | -0.209752 | -5.286627 | -2.946344 |
| C | -1.154478 | -5.249445 | -0.979094 |
| C | -1.936314 | -6.420961 | -1.206441 |
| C | -1.257007 | -4.572531 | 0.294649  |
| C | -2.179338 | -5.079281 | 1.257005  |
| C | -0.443877 | -3.403078 | 0.530629  |
| C | 0.279726  | -2.904551 | -0.555075 |
| O | -0.795187 | -0.563000 | 0.972927  |
| O | 1.015408  | -1.749646 | -0.380048 |
| P | 0.259031  | -0.298803 | -0.251245 |
| O | 1.447637  | 0.592795  | 0.174574  |
| O | -0.565693 | 0.062226  | -1.469913 |
| C | 0.877118  | -5.003746 | 5.348464  |
| C | 0.870382  | -5.621086 | 4.070149  |
| H | 0.575275  | -3.160476 | 6.443071  |
| H | 1.165679  | -5.582965 | 6.238813  |
| H | 0.511533  | -5.400181 | 1.959581  |
| H | 1.171645  | -6.675112 | 3.970579  |
| C | -2.938820 | -6.211546 | 0.995181  |
| C | -2.809515 | -6.897950 | -0.240821 |
| H | -2.291093 | -4.551862 | 2.214778  |
| H | -3.651479 | -6.576091 | 1.750515  |
| H | -3.412993 | -7.797259 | -0.436552 |
| H | -1.842896 | -6.931737 | -2.177838 |
| C | 0.665007  | 1.607796  | 3.492368  |
| C | -0.489719 | 0.778825  | 3.420522  |
| C | 0.489030  | 2.993653  | 3.649204  |
| C | -1.784942 | 1.357306  | 3.475436  |
| C | -1.905458 | 2.754568  | 3.619073  |
| C | -0.781614 | 3.592054  | 3.727772  |
| H | 1.379435  | 3.639520  | 3.715884  |
| C | -3.044895 | 0.495779  | 3.417648  |
| H | -2.914103 | 3.193578  | 3.666492  |
| C | -3.836619 | 0.716240  | 2.116889  |
| H | -4.179548 | 1.768094  | 2.022678  |
| H | -4.736389 | 0.067564  | 2.089817  |
| H | -3.226259 | 0.471829  | 1.225953  |
| C | -3.924634 | 0.700635  | 4.664603  |
| H | -2.718809 | -0.564907 | 3.426066  |
| H | -4.337141 | 1.730195  | 4.712441  |
| H | -3.349327 | 0.527513  | 5.596923  |
| H | -4.785394 | 0.000645  | 4.656140  |
| C | -0.891677 | 5.089132  | 4.009588  |
| C | -2.060385 | 5.785582  | 3.302092  |
| H | -2.004521 | 6.884418  | 3.443580  |
| H | -3.042104 | 5.454160  | 3.698116  |
| H | -2.066612 | 5.582456  | 2.218189  |
| C | -0.963975 | 5.351898  | 5.526355  |
| H | 0.052315  | 5.548223  | 3.636580  |
| H | -0.964761 | 6.441903  | 5.737423  |
| H | -0.111476 | 4.892782  | 6.064477  |
| H | -1.898768 | 4.924013  | 5.945266  |
| C | 2.076830  | 1.024569  | 3.454974  |
| C | 3.059728  | 1.862430  | 2.620866  |
| H | 3.999606  | 1.300945  | 2.445771  |
| H | 3.335317  | 2.811181  | 3.126499  |
| H | 2.621813  | 2.114612  | 1.637189  |
| C | 2.618667  | 0.828482  | 4.884988  |
| H | 2.007696  | 0.026282  | 2.975062  |
| H | 3.628417  | 0.368774  | 4.867700  |
| H | 1.958692  | 0.178065  | 5.491689  |
| H | 2.696713  | 1.804925  | 5.408158  |
| H | 2.997427  | -0.347498 | -6.580898 |
| H | 5.028375  | -3.999217 | -2.695047 |
| H | -2.079355 | -3.643996 | -5.890538 |
| C | 3.502486  | -0.292861 | -5.590549 |

|   |           |           |           |
|---|-----------|-----------|-----------|
| H | 4.623021  | -2.822803 | 0.251260  |
| H | 3.914228  | 1.853772  | -5.810569 |
| H | -2.720530 | -1.458805 | -4.551478 |
| C | 2.735307  | -1.228884 | -4.662204 |
| C | 4.242582  | -4.402067 | -2.022429 |
| C | 3.403866  | 1.166576  | -5.103534 |
| H | 3.884117  | 1.285410  | -4.109397 |
| C | 3.321109  | -1.777396 | -3.506156 |
| C | -1.007055 | -3.427998 | -5.703543 |
| H | 5.062238  | -1.758587 | -6.108937 |
| C | 1.395115  | -1.554529 | -4.926386 |
| C | 4.970203  | -0.700114 | -5.792434 |
| H | 5.446003  | -0.065129 | -6.567365 |
| H | 0.926487  | -1.149773 | -5.839111 |
| C | 4.160919  | -2.290867 | -0.605514 |
| H | 4.747269  | -4.946551 | -1.197533 |
| H | 3.646556  | -5.133535 | -2.605022 |
| C | 2.603533  | -2.602054 | -2.622503 |
| C | -1.627326 | -1.288969 | -4.500760 |
| C | 0.621684  | -2.355825 | -4.062883 |
| H | -0.462933 | -4.392372 | -5.647376 |
| H | -0.620077 | -2.875744 | -6.585552 |
| C | 3.352190  | -3.270910 | -1.469485 |
| C | 1.224161  | -2.864023 | -2.877404 |
| C | -0.844610 | -2.604432 | -4.415479 |
| H | 3.513041  | -1.492588 | -0.193646 |
| H | -1.419844 | -0.713616 | -3.579669 |
| H | 4.981334  | -1.803672 | -1.170880 |
| H | 2.348659  | 1.488290  | -5.003364 |
| H | -1.325501 | -0.667056 | -5.368473 |
| H | 5.560650  | -0.569209 | -4.861888 |
| H | 2.603082  | -3.751513 | -0.808418 |
| H | -1.298124 | -3.182197 | -3.586947 |
| H | 4.379602  | -1.569449 | -3.289001 |
| H | -0.223446 | 4.817230  | 0.838181  |

### TS2-8-a; COSMO

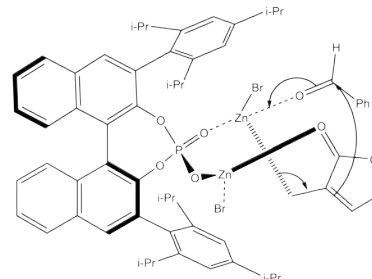

Energy(Hartree) = -11970.02083721

|    |            |           |            |
|----|------------|-----------|------------|
| Zn | 2.8630030  | 1.7689976 | -0.3582645 |
| Br | 5.1020596  | 1.9453149 | 0.0349200  |
| C  | -5.8778560 | 3.7467659 | 0.3451562  |
| C  | -4.6036318 | 3.1605386 | 0.3073695  |
| C  | -3.6298144 | 3.5039436 | 1.2679017  |
| C  | -3.9647607 | 4.4376175 | 2.2745006  |
| C  | -5.2389365 | 5.0173455 | 2.3171159  |
| C  | -6.2007055 | 4.6753708 | 1.3478055  |
| H  | -6.6247020 | 3.4679960 | -0.4143136 |
| H  | -4.3679636 | 2.4174578 | -0.4693826 |
| C  | -2.2708526 | 2.8679603 | 1.2384404  |
| H  | -3.2146330 | 4.7129809 | 3.0318660  |
| H  | -5.4868310 | 5.7391810 | 3.1105897  |
| H  | -7.2020480 | 5.1318252 | 1.3788072  |
| O  | -2.0383813 | 1.8927216 | 0.4215506  |
| C  | -1.0539545 | 4.4593915 | 0.7845362  |
| C  | -0.5658449 | 4.1315465 | -0.5199215 |
| C  | 0.8159962  | 3.6465307 | -0.3265659 |
| O  | 1.2057780  | 3.8052666 | 0.9391603  |
| C  | 0.1426620  | 4.4360235 | 1.7100360  |

|    |            |            |            |   |            |            |            |
|----|------------|------------|------------|---|------------|------------|------------|
| O  | 1.5826250  | 3.1356888  | -1.1662891 | H | -3.1232633 | 1.5037350  | 6.9527598  |
| C  | -1.2250141 | 3.9662340  | -1.7378907 | C | 1.8241569  | -0.5888022 | 3.3305633  |
| H  | 0.5027156  | 5.4453175  | 2.0010045  | C | 2.7674816  | 0.6206677  | 3.2126442  |
| H  | 0.0187906  | 3.8253061  | 2.6282736  | H | 3.7178778  | 0.3244548  | 2.7241683  |
| Zn | -1.9358543 | 1.8401386  | -1.5273341 | H | 3.0293237  | 1.0413584  | 4.2060052  |
| Br | -3.6845599 | 1.3176533  | -2.9845759 | H | 2.3107447  | 1.4283162  | 2.6084978  |
| H  | -0.6098355 | 3.7807698  | -2.6345873 | C | 2.3866096  | -1.6077538 | 4.3410324  |
| H  | -2.2090266 | 4.4364104  | -1.8941881 | H | 1.7973994  | -1.0800049 | 2.3353675  |
| H  | -1.8006569 | 5.2540720  | 0.9166140  | H | 3.4264906  | -1.8892907 | 4.0745692  |
| C  | -0.4502191 | -2.1042553 | 0.9176099  | H | 1.7814371  | -2.5345540 | 4.3721772  |
| C  | -0.2148605 | -3.2260962 | 0.1082220  | H | 2.4005313  | -1.1766129 | 5.3641111  |
| C  | 0.0580413  | -4.4833859 | 0.7684241  | H | 4.3963895  | 2.8441423  | -5.4128530 |
| C  | 0.4835388  | -5.6524700 | 0.0659919  | H | 5.7647916  | -2.1961634 | -3.6109864 |
| C  | -0.0590620 | -4.5646010 | 2.2051279  | H | -0.9225404 | -0.2470196 | -6.9563568 |
| C  | 0.1726740  | -5.8119670 | 2.8596640  | C | 4.5327392  | 2.5554692  | -4.3457658 |
| C  | -0.3552259 | -3.3903700 | 2.9530543  | H | 4.8519797  | -2.7085312 | -0.5787351 |
| H  | -0.4384517 | -3.4628488 | 4.0485190  | H | 4.5449288  | 4.6628108  | -3.7202174 |
| C  | -0.5062261 | -2.1514491 | 2.3427864  | H | -1.5902426 | 1.5947090  | -5.2228951 |
| C  | 1.0327853  | -2.0400678 | -3.3238564 | C | 3.6822479  | 1.3057262  | -4.1349605 |
| C  | 0.3982316  | -2.9307949 | -4.1806220 | C | 4.9049671  | -2.8571935 | -3.3739345 |
| H  | 0.6214913  | -2.9062024 | -5.2573299 | C | 4.0027775  | 3.7228891  | -3.4876567 |
| C  | -0.5730109 | -3.8639579 | -3.7061997 | H | 4.1505912  | 3.5070992  | -2.4090989 |
| C  | -1.2804711 | -4.7080106 | -4.6141454 | C | 4.1142395  | 0.1966618  | -3.3859780 |
| C  | -0.8721179 | -3.9493185 | -2.2943880 | C | 0.1084023  | -0.2480842 | -6.5458377 |
| C  | -1.9036380 | -4.8377302 | -1.8693384 | H | 6.4316447  | 1.4986406  | -4.7003836 |
| C  | -0.1383427 | -3.1103579 | -1.3790766 | C | 2.3917152  | 1.2497682  | -4.6899217 |
| C  | 0.7229352  | -2.1652081 | -1.9347869 | C | 6.0321465  | 2.3433389  | -4.1033410 |
| O  | -0.7156234 | -0.8619128 | 0.3444988  | H | 6.5995269  | 3.2552347  | -4.3786845 |
| O  | 1.3559270  | -1.2734759 | -1.0765409 | H | 2.0436301  | 2.1063141  | -5.2881841 |
| P  | 0.4152424  | -0.0556202 | -0.5151959 | C | 4.5168846  | -1.7882402 | -1.0997089 |
| O  | 1.3973399  | 0.7344523  | 0.3826693  | H | 5.3031976  | -3.7687338 | -2.8818444 |
| O  | -0.2970376 | 0.6889008  | -1.6407591 | H | 4.4377707  | -3.1588506 | -4.3333457 |
| C  | 0.5480848  | -6.9363213 | 2.1406328  | C | 3.2972351  | -0.9342408 | -3.1856176 |
| C  | 0.7216345  | -6.8459960 | 0.7337914  | C | -0.5103916 | 1.6332298  | -4.9806512 |
| H  | 0.0640632  | -5.8571037 | 3.9547645  | C | 1.5185659  | 0.1665274  | -4.4864186 |
| H  | 0.7304987  | -7.8907864 | 2.6574954  | H | 0.5190667  | -1.2717310 | -6.6520127 |
| H  | 0.6364938  | -5.6017767 | -1.0202295 | H | 0.7282517  | 0.4221537  | -7.1780646 |
| H  | 1.0545310  | -7.7283572 | 0.1660946  | C | 3.8912092  | -2.1413072 | -2.4589903 |
| C  | -2.5848039 | -5.6313697 | -2.7826053 | C | 1.9757865  | -0.9450798 | -3.7189200 |
| C  | -2.2635233 | -5.5778187 | -4.1650737 | C | 0.1134785  | 0.2324540  | -5.0812606 |
| H  | -2.1636933 | -4.8810765 | -0.8020543 | H | 3.7856162  | -1.2745511 | -0.4453109 |
| H  | -3.3835784 | -6.3028015 | -2.4324212 | H | -0.4139332 | 2.0263832  | -3.9505475 |
| H  | -2.8054803 | -6.2160965 | -4.8793803 | H | 5.4001557  | -1.1256741 | -1.2040741 |
| H  | -1.0397507 | -4.6430719 | -5.6869056 | H | 2.9203172  | 3.8949063  | -3.6492819 |
| C  | 0.3872773  | -0.1960232 | 3.6749839  | H | -0.0327485 | 2.3570734  | -5.6732810 |
| C  | -0.7277696 | -0.9131321 | 3.1607133  | H | 6.2413582  | 2.1380907  | -3.0328331 |
| C  | 0.1462187  | 0.8773857  | 4.5540517  | H | 3.0720747  | -2.8635309 | -2.2669758 |
| C  | -2.0506129 | -0.4972792 | 3.4664616  | H | -0.5304691 | -0.4496959 | -4.4888365 |
| C  | -2.2366490 | 0.5902187  | 4.3413205  | H | 5.1267908  | 0.1944214  | -2.9584888 |
| C  | -1.1517847 | 1.2700568  | 4.9246194  | H | -1.7962205 | 2.7617491  | 2.2418281  |
| H  | 1.0017130  | 1.4189329  | 4.9878637  |   |            |            |            |
| C  | -3.2673913 | -1.2199863 | 2.8924125  |   |            |            |            |
| H  | -3.2651420 | 0.8979360  | 4.5912036  |   |            |            |            |
| C  | -4.1181370 | -0.2927126 | 2.0066399  |   |            |            |            |
| H  | -4.5381989 | 0.5563632  | 2.5866396  |   |            |            |            |
| H  | -4.9714992 | -0.8492501 | 1.5669340  |   |            |            |            |
| H  | -3.5141681 | 0.1347453  | 1.1831219  |   |            |            |            |
| C  | -4.1047272 | -1.8791776 | 4.0033987  |   |            |            |            |
| H  | -2.8909144 | -2.0363152 | 2.2420195  |   |            |            |            |
| H  | -4.5383368 | -1.1212016 | 4.6892402  |   |            |            |            |
| H  | -3.4906249 | -2.5726689 | 4.6139905  |   |            |            |            |
| H  | -4.9465980 | -2.4570713 | 3.5690661  |   |            |            |            |
| C  | -1.3611006 | 2.3696104  | 5.9606198  |   |            |            |            |
| C  | -2.0842387 | 3.5952211  | 5.3798685  |   |            |            |            |
| H  | -2.1983969 | 4.3912461  | 6.1445092  |   |            |            |            |
| H  | -3.0986738 | 3.3298979  | 5.0167790  |   |            |            |            |
| H  | -1.5207215 | 4.0256669  | 4.5265850  |   |            |            |            |
| C  | -2.0935936 | 1.8334973  | 7.2044553  |   |            |            |            |
| H  | -0.3499240 | 2.7009546  | 6.2845635  |   |            |            |            |
| H  | -2.1743899 | 2.6180431  | 7.9852041  |   |            |            |            |
| H  | -1.5602286 | 0.9653345  | 7.6411683  |   |            |            |            |

### TS2-8-a

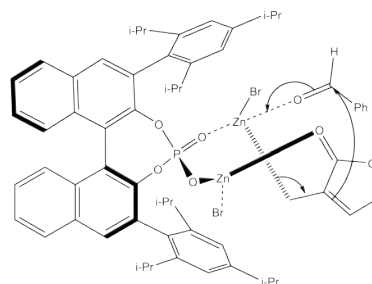

Energy(Hartree)= -11970.01338271  
number of imaginary frequencies: 1

|    |            |           |            |
|----|------------|-----------|------------|
| Zn | 2.8733171  | 1.7622830 | -0.3652792 |
| Br | 5.1079801  | 1.9511109 | 0.0216564  |
| C  | -5.8727250 | 3.7364721 | 0.3465044  |
| C  | -4.5993925 | 3.1491661 | 0.3071274  |
| C  | -3.6264254 | 3.4901845 | 1.2689704  |

|    |            |            |            |   |            |            |            |
|----|------------|------------|------------|---|------------|------------|------------|
| C  | -3.9616970 | 4.4217456  | 2.2774185  | H | -3.5146458 | 0.1305308  | 1.1803466  |
| C  | -5.2349227 | 5.0026889  | 2.3204160  | C | -4.1061259 | -1.8729567 | 4.0075879  |
| C  | -6.1956612 | 4.6632666  | 1.3502117  | H | -2.8925614 | -2.0353547 | 2.2469490  |
| H  | -6.6179040 | 3.4587952  | -0.4145823 | H | -4.5406539 | -1.1139127 | 4.6913912  |
| H  | -4.3655794 | 2.4086114  | -0.4728643 | H | -3.4924572 | -2.5640586 | 4.6208894  |
| C  | -2.2673235 | 2.8555357  | 1.2385754  | H | -4.9478584 | -2.4523064 | 3.5751870  |
| H  | -3.2121658 | 4.6928532  | 3.0367754  | C | -1.3577705 | 2.3669211  | 5.9661308  |
| H  | -5.4827886 | 5.7232131  | 3.1151151  | C | -2.0778674 | 3.5967441  | 5.3905676  |
| H  | -7.1966557 | 5.1204194  | 1.3815375  | H | -2.1898184 | 4.3911829  | 6.1572741  |
| O  | -2.0287791 | 1.8857629  | 0.4202007  | H | -3.0928934 | 3.3357396  | 5.0262334  |
| C  | -1.0508662 | 4.4623663  | 0.7768708  | H | -1.5142008 | 4.0274334  | 4.5373712  |
| C  | -0.5639779 | 4.1304966  | -0.5270162 | C | -2.0908053 | 1.8280340  | 7.2081266  |
| C  | 0.8177840  | 3.6449281  | -0.3334564 | H | -0.3457570 | 2.6948236  | 6.2915782  |
| O  | 1.2090474  | 3.8097005  | 0.9337796  | H | -2.1701867 | 2.6086523  | 7.9929344  |
| C  | 0.1466181  | 4.4402798  | 1.7015216  | H | -1.5595621 | 0.9564993  | 7.6398671  |
| O  | 1.5840939  | 3.1318570  | -1.1699699 | H | -3.1209007 | 1.5006989  | 6.9558860  |
| C  | -1.2231494 | 3.9600504  | -1.7436430 | C | 1.8235532  | -0.5846900 | 3.3245769  |
| H  | 0.5072238  | 5.4499002  | 1.9941721  | C | 2.7668598  | 0.6247653  | 3.2074698  |
| H  | 0.0203079  | 3.8297531  | 2.6203735  | H | 3.7164900  | 0.3311041  | 2.7162323  |
| Zn | -1.9403804 | 1.8234764  | -1.5322628 | H | 3.0318596  | 1.0429969  | 4.2010918  |
| Br | -3.6885695 | 1.3521150  | -2.9925357 | H | 2.3095354  | 1.4341703  | 2.6062605  |
| H  | -0.6100493 | 3.7648329  | -2.6394656 | C | 2.3871443  | -1.6061396 | 4.3316472  |
| H  | -2.2101792 | 4.4223752  | -1.9027728 | H | 1.7955065  | -1.0738685 | 2.3285174  |
| H  | -1.8033008 | 5.2516442  | 0.9094588  | H | 3.4264443  | -1.8871654 | 4.0630136  |
| C  | -0.4505431 | -2.1016887 | 0.9169280  | H | 1.7824885  | -2.5331692 | 4.3606095  |
| C  | -0.2170682 | -3.2250451 | 0.1088241  | H | 2.4024388  | -1.1782985 | 5.3559860  |
| C  | 0.0499107  | -4.4827322 | 0.7706195  | H | 4.3934851  | 2.8439463  | -5.4133008 |
| C  | 0.4714426  | -5.6538732 | 0.0697091  | H | 5.7689414  | -2.1844192 | -3.6062752 |
| C  | -0.0701587 | -4.5630327 | 2.2069511  | H | -0.9192566 | -0.2527084 | -6.9568718 |
| C  | 0.1545999  | -5.8110504 | 2.8615364  | C | 4.5297071  | 2.5593940  | -4.3448910 |
| C  | -0.3627428 | -3.3871932 | 2.9530925  | H | 4.8547214  | -2.7034738 | -0.5738699 |
| H  | -0.4483813 | -3.4567799 | 4.0486056  | H | 4.5426352  | 4.6688881  | -3.7259776 |
| C  | -0.5088328 | -2.1483495 | 2.3419913  | H | -1.5926561 | 1.5889171  | -5.2232038 |
| C  | 1.0364167  | -2.0408217 | -3.3218399 | C | 3.6799773  | 1.3095657  | -4.1312320 |
| C  | 0.4021361  | -2.9315406 | -4.1785335 | C | 4.9110676  | -2.8480431 | -3.3700844 |
| H  | 0.6257996  | -2.9047357 | -5.2550684 | C | 4.0004023  | 3.7297731  | -3.4904315 |
| C  | -0.5698498 | -3.8642952 | -3.7058246 | H | 4.1498617  | 3.5180602  | -2.4114239 |
| C  | -1.2768525 | -4.7077846 | -4.6139061 | C | 4.1128685  | 0.2023549  | -3.3803892 |
| C  | -0.8711304 | -3.9490307 | -2.2946677 | C | 0.1112683  | -0.2513534 | -6.5455691 |
| C  | -1.9041613 | -4.8360192 | -1.8713057 | H | 6.4286202  | 1.5019929  | -4.6963717 |
| C  | -0.1375451 | -3.1109754 | -1.3784559 | C | 2.3905303  | 1.2503081  | -4.6875304 |
| C  | 0.7257187  | -2.1670416 | -1.9330543 | C | 6.0291337  | 2.3482713  | -4.1017079 |
| O  | -0.7119373 | -0.8589521 | 0.3446853  | H | 6.5969654  | 3.2590479  | -4.3795942 |
| O  | 1.3589088  | -1.2764057 | -1.0741782 | H | 2.0415568  | 2.1052006  | -5.2876557 |
| P  | 0.4194456  | -0.0557426 | -0.5172209 | C | 4.5179313  | -1.7836198 | -1.0944304 |
| O  | 1.4029888  | 0.7352356  | 0.3784095  | H | 5.3122795  | -3.7591194 | -2.8796136 |
| O  | -0.2922329 | 0.6859663  | -1.6448114 | H | 4.4457646  | -3.1491003 | -4.3304049 |
| C  | 0.5255725  | -6.9371544 | 2.1440504  | C | 3.2983593  | -0.9302805 | -3.1812558 |
| C  | 0.7021112  | -6.8479565 | 0.7381345  | C | -0.5126714 | 1.6287329  | -4.9822666 |
| H  | 0.0439706  | -5.8552229 | 3.9564728  | C | 1.5190805  | 0.1658559  | -4.4849166 |
| H  | 0.7022919  | -7.8921836 | 2.6617067  | H | 0.5249721  | -1.2737225 | -6.6519593 |
| H  | 0.6258591  | -5.6032906 | -1.0162029 | H | 0.7304695  | 0.4192290  | -7.1778877 |
| H  | 1.0315325  | -7.7319771 | 0.1711141  | C | 3.8947600  | -2.1363340 | -2.4548797 |
| C  | -2.5841860 | -5.6291946 | -2.7851582 | C | 1.9777844  | -0.9443411 | -3.7164457 |
| C  | -2.2608982 | -5.5764535 | -4.1665618 | C | 0.1143940  | 0.2293559  | -5.0811570 |
| H  | -2.1652985 | -4.8777253 | -0.8043510 | H | 3.7850216  | -1.2730878 | -0.4396211 |
| H  | -3.3843510 | -6.2993969 | -2.4359427 | H | -0.4173627 | 2.0221699  | -3.9522631 |
| H  | -2.8025644 | -6.2139298 | -4.8817527 | H | 5.3994808  | -1.1183544 | -1.1949543 |
| H  | -1.0351732 | -4.6422479 | -5.6863965 | H | 2.9179858  | 3.9021850  | -3.6522225 |
| C  | 0.3871464  | -0.1927744 | 3.6719132  | H | -0.0364161 | 2.3533740  | -5.6751966 |
| C  | -0.7287566 | -0.9094784 | 3.1593479  | H | 6.2380623  | 2.1473223  | -3.0304422 |
| C  | 0.1470156  | 0.8792007  | 4.5526652  | H | 3.0771500  | -2.8609322 | -2.2649772 |
| C  | -2.0511655 | -0.4944380 | 3.4673899  | H | -0.5299996 | -0.4530361 | -4.4895433 |
| C  | -2.2357442 | 0.5921692  | 4.3433698  | H | 5.1242786  | 0.2032523  | -2.9504369 |
| C  | -1.1501921 | 1.2709316  | 4.9258890  | H | -1.7880459 | 2.7545570  | 2.2405284  |
| H  | 1.0036696  | 1.4188040  | 4.9866694  |   |            |            |            |
| C  | -3.2687270 | -1.2171695 | 2.8950069  |   |            |            |            |
| H  | -3.2641134 | 0.8989787  | 4.5948336  |   |            |            |            |
| C  | -4.1183044 | -0.2920503 | 2.0062384  |   |            |            |            |
| H  | -4.5388821 | 0.5591298  | 2.5826013  |   |            |            |            |
| H  | -4.9717171 | -0.8487569 | 1.5673149  |   |            |            |            |

int1-8-a; COSMO

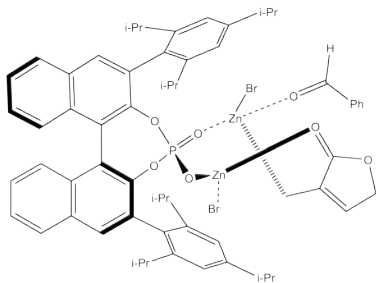

Energy(Hartree) = -11970.03133934

|    |            |            |            |
|----|------------|------------|------------|
| Zn | 2.8706617  | 1.0532862  | 1.5351252  |
| Br | 4.9681371  | 0.5520300  | 2.2798348  |
| C  | -5.6681797 | 3.7778377  | 1.5116011  |
| C  | -4.5465774 | 2.9655436  | 1.3124124  |
| C  | -4.0266389 | 2.2082653  | 2.3895179  |
| C  | -4.6542879 | 2.2686554  | 3.6567873  |
| C  | -5.7724186 | 3.0876904  | 3.8512758  |
| C  | -6.2789621 | 3.8438364  | 2.7779386  |
| H  | -6.0723990 | 4.3617008  | 0.6708610  |
| H  | -4.0793897 | 2.8994840  | 0.3157874  |
| C  | -2.8331628 | 1.3697280  | 2.2190083  |
| H  | -4.2503440 | 1.6747534  | 4.4898325  |
| H  | -6.2546321 | 3.1378883  | 4.8391377  |
| H  | -7.1607028 | 4.4857375  | 2.9288942  |
| O  | -2.1212690 | 1.3409158  | 1.2046465  |
| C  | -0.9675820 | 3.1963150  | 3.6739897  |
| C  | -0.3634723 | 3.5114036  | 2.4770885  |
| C  | 0.9265951  | 2.7968109  | 2.5059950  |
| O  | 1.0749715  | 2.0858799  | 3.6358772  |
| C  | -0.0958999 | 2.2765758  | 4.4635983  |
| O  | 1.8215741  | 2.7792395  | 1.6366218  |
| C  | -0.8140574 | 4.2139566  | 1.2863309  |
| H  | 0.2442202  | 2.6851021  | 5.4403934  |
| H  | -0.5338116 | 1.2702799  | 4.6513124  |
| Zn | -1.3799490 | 2.8256520  | -0.1412060 |
| Br | -2.7946740 | 3.0087582  | -2.0358081 |
| H  | 0.0100294  | 4.7550296  | 0.7810559  |
| H  | -1.6753640 | 4.8828526  | 1.4686027  |
| H  | -1.9391049 | 3.5599654  | 4.0324602  |
| C  | -0.5933628 | -2.1158400 | -0.8261643 |
| C  | -0.1576210 | -2.4226662 | -2.1241879 |
| C  | -0.0300445 | -3.8182611 | -2.4790149 |
| C  | 0.5652607  | -4.2554885 | -3.7020688 |
| C  | -0.4803364 | -4.8266359 | -1.5493232 |
| C  | -0.3870848 | -6.2053075 | -1.9078981 |
| C  | -0.9736971 | -4.4333072 | -0.2737147 |
| H  | -1.3237327 | -5.2088790 | 0.4250480  |
| C  | -1.0023285 | -3.1017899 | 0.1217744  |
| C  | 1.8250587  | 0.5549055  | -3.5139032 |
| C  | 1.4067174  | 0.5792446  | -4.8383423 |
| H  | 1.8686610  | 1.2857477  | -5.5433999 |
| C  | 0.3594319  | -0.2684127 | -5.3101554 |
| C  | -0.1203094 | -0.1629761 | -6.6502961 |
| C  | -0.2485697 | -1.2338743 | -4.4234082 |
| C  | -1.3431612 | -2.0088452 | -4.9082519 |
| C  | 0.2559583  | -1.3512103 | -3.0778367 |
| C  | 1.2132915  | -0.4230256 | -2.6708611 |
| O  | -0.7189661 | -0.7926342 | -0.4149624 |
| O  | 1.6312603  | -0.4549178 | -1.3457537 |
| P  | 0.5779593  | 0.1973082  | -0.2689592 |
| O  | 1.3117542  | -0.0088919 | 1.0804969  |
| O  | 0.1545560  | 1.6031683  | -0.6553391 |
| C  | 0.1646926  | -6.5915549 | -3.1197146 |
| C  | 0.6598749  | -5.6049131 | -4.0136406 |
| H  | -0.7490523 | -6.9589662 | -1.1908813 |
| H  | 0.2370503  | -7.6579900 | -3.3823018 |

|   |            |            |            |
|---|------------|------------|------------|
| H | 0.9655013  | -3.5096109 | -4.4016670 |
| H | 1.1294116  | -5.9115957 | -4.9608419 |
| C | -1.7969155 | -1.8674617 | -6.2128749 |
| C | -1.1738333 | -0.9471626 | -7.0973225 |
| H | -1.8362974 | -2.7184853 | -4.2287065 |
| H | -2.6498882 | -2.4693587 | -6.5619164 |
| H | -1.5377868 | -0.8474093 | -8.1312710 |
| H | 0.3547744  | 0.5697731  | -7.3214945 |
| C | -0.5584703 | -2.6675224 | 2.5751489  |
| C | -1.4772015 | -2.7151765 | 1.4911566  |
| C | -1.0589015 | -2.4175348 | 3.8672858  |
| C | -2.8570437 | -2.4501481 | 1.7059592  |
| C | -3.3023968 | -2.1890571 | 3.0169406  |
| C | -2.4246022 | -2.2000060 | 4.1172109  |
| H | -0.3629924 | -2.4136806 | 4.7209565  |
| C | -3.8570887 | -2.4538991 | 0.5495199  |
| H | -4.3754606 | -2.0008803 | 3.1839271  |
| C | -4.2958559 | -1.0269565 | 0.1702931  |
| H | -4.8050330 | -0.5251707 | 1.0208731  |
| H | -5.0109470 | -1.0522409 | -0.6777723 |
| H | -3.4338078 | -0.3994709 | -0.1269679 |
| C | -5.0683523 | -3.3602242 | 0.8298272  |
| H | -3.3344379 | -2.8765607 | -0.3330995 |
| H | -5.6910973 | -2.9730946 | 1.6633896  |
| H | -4.7513907 | -4.3893283 | 1.0955745  |
| H | -5.7210393 | -3.4212802 | -0.0651069 |
| C | -2.9270950 | -2.0361359 | 5.5480354  |
| C | -3.5476481 | -0.6532543 | 5.8020432  |
| H | -3.8648633 | -0.5456436 | 6.8598573  |
| H | -4.4446916 | -0.4954525 | 5.1675718  |
| H | -2.8227217 | 0.1585651  | 5.5832517  |
| C | -3.9069520 | -3.1606078 | 5.9302186  |
| H | -2.0382877 | -2.1276373 | 6.2102319  |
| H | -4.2100587 | -3.0775213 | 6.9945327  |
| H | -3.4498382 | -4.1589174 | 5.7782495  |
| H | -4.8294227 | -3.1163001 | 5.3141789  |
| C | 0.9340253  | -2.9308266 | 2.3758889  |
| C | 1.8255435  | -2.1082552 | 3.3217719  |
| H | 2.8808040  | -2.1410229 | 2.9827544  |
| H | 1.8039636  | -2.5015675 | 4.3597455  |
| H | 1.5106544  | -1.0469710 | 3.3488573  |
| C | 1.2581252  | -4.4321463 | 2.5066056  |
| H | 1.1837700  | -2.6195871 | 1.3405201  |
| H | 2.3412957  | -4.6129377 | 2.3466839  |
| H | 0.7001248  | -5.0397795 | 1.7679164  |
| H | 0.9952635  | -4.8027637 | 3.5197603  |
| H | 5.5671285  | 4.9917969  | -1.0852666 |
| H | 6.5130354  | -0.0838067 | -3.0943715 |
| H | 0.6092671  | 4.5599098  | -5.0933166 |
| C | 5.4664477  | 4.0394658  | -0.5162420 |
| H | 4.9508259  | -2.3492982 | -1.4472220 |
| H | 5.3342638  | 5.1243310  | 1.3916393  |
| H | -0.3481879 | 4.8201546  | -2.6590342 |
| C | 4.5939748  | 3.1242601  | -1.3713195 |
| C | 5.6202483  | -0.5891976 | -3.5187888 |
| C | 4.7561101  | 4.3751730  | 0.8118568  |
| H | 4.6601058  | 3.4641614  | 1.4385600  |
| C | 4.8604101  | 1.7563718  | -1.5541545 |
| C | 1.5430546  | 4.1310807  | -4.6741980 |
| H | 7.4023627  | 3.2375766  | -1.1934104 |
| C | 3.4439280  | 3.6493054  | -1.9872733 |
| C | 6.8765473  | 3.4974160  | -0.2523077 |
| H | 7.4862726  | 4.2533780  | 0.2826182  |
| H | 3.2266958  | 4.7210778  | -1.8586822 |
| C | 4.7396434  | -1.2809301 | -1.2353758 |
| H | 5.8978163  | -1.6416921 | -3.7359989 |
| H | 5.3766744  | -0.0912811 | -4.4793126 |
| C | 4.0130935  | 0.9249989  | -2.3136957 |
| C | 0.6826811  | 4.5638676  | -2.3445432 |
| C | 2.5431565  | 2.8592772  | -2.7227304 |
| H | 1.9354754  | 3.3921392  | -5.4000324 |

|   |            |            |            |
|---|------------|------------|------------|
| H | 2.2909592  | 4.9485819  | -4.5989532 |
| C | 4.4307277  | -0.5281290 | -2.5401446 |
| C | 2.8303494  | 1.4721573  | -2.8882395 |
| C | 1.2816853  | 3.5088455  | -3.2884783 |
| H | 3.8824759  | -1.2344756 | -0.5357712 |
| H | 0.6389078  | 4.1780408  | -1.3077662 |
| H | 5.6246920  | -0.8650030 | -0.7118133 |
| H | 3.7361712  | 4.7743138  | 0.6444166  |
| H | 1.2769849  | 5.5015213  | -2.3307801 |
| H | 6.8453409  | 2.5901228  | 0.3864049  |
| H | 3.5873950  | -1.0540167 | -3.0317279 |
| H | 0.5197170  | 2.7100085  | -3.4022676 |
| H | 5.7608036  | 1.3154501  | -1.1036450 |
| H | -2.5788545 | 0.6860567  | 3.0691899  |

### int1-8-a

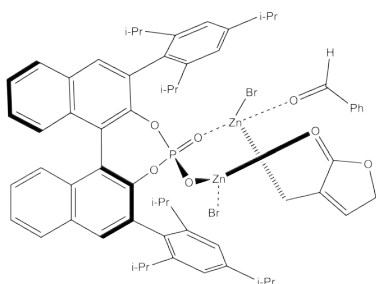

Energy(Hartree)= -11970.0195831

|    |            |            |            |
|----|------------|------------|------------|
| Zn | 2.8888440  | 1.0493502  | 1.5252827  |
| Br | 4.9817752  | 0.5420321  | 2.2644081  |
| C  | -5.6942555 | 3.8502913  | 1.4378314  |
| C  | -4.5747788 | 3.0360048  | 1.2347139  |
| C  | -4.1044033 | 2.2155016  | 2.2875736  |
| C  | -4.7796932 | 2.2130922  | 3.5311315  |
| C  | -5.8958229 | 3.0337663  | 3.7288777  |
| C  | -6.3520360 | 3.8549101  | 2.6814872  |
| H  | -6.0586327 | 4.4834934  | 0.6147892  |
| H  | -4.0730220 | 3.0184047  | 0.2521637  |
| C  | -2.9145245 | 1.3696280  | 2.1166860  |
| H  | -4.4156287 | 1.5640650  | 4.3413422  |
| H  | -6.4162679 | 3.0340406  | 4.6985428  |
| H  | -7.2318782 | 4.4989544  | 2.8349158  |
| O  | -2.1777673 | 1.3695280  | 1.1216145  |
| C  | -1.0117999 | 3.0800279  | 3.6450126  |
| C  | -0.3849489 | 3.4532319  | 2.4756353  |
| C  | 0.9147008  | 2.7534121  | 2.5035736  |
| O  | 1.0464909  | 1.9989586  | 3.6092145  |
| C  | -0.1510018 | 2.1258258  | 4.4068745  |
| O  | 1.8289827  | 2.7795397  | 1.6571597  |
| C  | -0.8152666 | 4.1991868  | 1.3078118  |
| H  | 0.1530480  | 2.4768102  | 5.4180293  |
| H  | -0.5801701 | 1.1032825  | 4.5153504  |
| Zn | -1.3775473 | 2.8653425  | -0.1829406 |
| Br | -2.7708097 | 3.1429272  | -2.0639768 |
| H  | 0.0156119  | 4.7517409  | 0.8276742  |
| H  | -1.6810193 | 4.8604408  | 1.4952112  |
| H  | -1.9954267 | 3.4185115  | 3.9946971  |
| C  | -0.5988876 | -2.1017320 | -0.8156875 |
| C  | -0.1707460 | -2.4066653 | -2.1169171 |
| C  | -0.0476794 | -3.8016673 | -2.4754186 |
| C  | 0.5379393  | -4.2367604 | -3.7036174 |
| C  | -0.4929053 | -4.8118129 | -1.5454434 |
| C  | -0.4046816 | -6.1890314 | -1.9087846 |
| C  | -0.9749109 | -4.4206931 | -0.2652436 |
| H  | -1.3195679 | -5.1966476 | 0.4358789  |
| C  | -0.9993005 | -3.0903044 | 0.1336550  |
| C  | 1.8196648  | 0.5676697  | -3.5019456 |

|   |            |            |            |
|---|------------|------------|------------|
| C | 1.3958884  | 0.5993080  | -4.8242821 |
| H | 1.8581782  | 1.3080946  | -5.5267078 |
| C | 0.3442771  | -0.2421528 | -5.2968945 |
| C | -0.1391994 | -0.1295904 | -6.6345295 |
| C | -0.2642665 | -1.2098360 | -4.4131663 |
| C | -1.3616291 | -1.9797821 | -4.8987771 |
| C | 0.2429738  | -1.3338617 | -3.0693522 |
| C | 1.2053157  | -0.4111248 | -2.6619553 |
| O | -0.7242957 | -0.7797577 | -0.4013964 |
| O | 1.6238036  | -0.4477104 | -1.3370207 |
| P | 0.5727052  | 0.2130397  | -0.2638816 |
| O | 1.3054437  | 0.0127695  | 1.0868689  |
| O | 0.1511406  | 1.6173393  | -0.6556184 |
| C | 0.1369334  | -6.5729535 | -3.1252213 |
| C | 0.6271021  | -5.5850348 | -4.0195334 |
| H | -0.7623234 | -6.9440136 | -1.1909908 |
| H | 0.2052742  | -7.6387771 | -3.3910788 |
| H | 0.9336575  | -3.4889701 | -4.4035318 |
| H | 1.0887819  | -5.8897068 | -4.9711541 |
| C | -1.8175234 | -1.8317799 | -6.2014016 |
| C | -1.1950001 | -0.9090527 | -7.0826186 |
| H | -1.8542196 | -2.6907295 | -4.2203806 |
| H | -2.6727947 | -2.4299916 | -6.5509392 |
| H | -1.5616116 | -0.8029372 | -8.1149120 |
| H | 0.3350782  | 0.6061165  | -7.3029651 |
| C | -0.5254780 | -2.6309990 | 2.5772819  |
| C | -1.4599603 | -2.7039092 | 1.5080191  |
| C | -1.0087117 | -2.3577730 | 3.8711565  |
| C | -2.8404841 | -2.4579730 | 1.7409563  |
| C | -3.2683709 | -2.1772369 | 3.0536311  |
| C | -2.3722121 | -2.1479089 | 4.1381328  |
| H | -0.2995026 | -2.3318271 | 4.7133337  |
| C | -3.8583832 | -2.5009426 | 0.6009799  |
| H | -4.3417998 | -2.0048437 | 3.2345622  |
| C | -4.3031299 | -1.0882760 | 0.1786630  |
| H | -4.8091818 | -0.5609348 | 1.0156739  |
| H | -5.0238299 | -1.1415837 | -0.6630839 |
| H | -3.4454764 | -0.4679268 | -0.1446873 |
| C | -5.0652565 | -3.3967846 | 0.9284128  |
| H | -3.3478355 | -2.9533842 | -0.2737715 |
| H | -5.6819925 | -2.9790350 | 1.7516603  |
| H | -4.7455126 | -4.4146223 | 1.2309706  |
| H | -5.7269890 | -3.4926410 | 0.0434162  |
| C | -2.8531441 | -1.9635391 | 5.5739277  |
| C | -3.5526068 | -0.6141181 | 5.8013206  |
| H | -3.8469975 | -0.4900890 | 6.8639031  |
| H | -4.4759824 | -0.5336448 | 5.1903690  |
| H | -2.8885979 | 0.2339753  | 5.5330144  |
| C | -3.7526931 | -3.1335432 | 6.0130936  |
| H | -1.9464088 | -1.9793293 | 6.2182352  |
| H | -4.0434570 | -3.0350740 | 7.0795894  |
| H | -3.2355497 | -4.1050559 | 5.8840102  |
| H | -4.6849451 | -3.1689824 | 5.4116273  |
| C | 0.9641968  | -2.8985452 | 2.3630984  |
| C | 1.8707354  | -2.0881688 | 3.3044874  |
| H | 2.9216711  | -2.1217020 | 2.9531153  |
| H | 1.8617351  | -2.4909605 | 4.3391255  |
| H | 1.5625251  | -1.0255863 | 3.3459068  |
| C | 1.2807734  | -4.4024818 | 2.4836613  |
| H | 1.2058957  | -2.5842673 | 1.3268450  |
| H | 2.3618277  | -4.5873019 | 2.3156769  |
| H | 0.7162206  | -5.0035717 | 1.7450585  |
| H | 1.0227709  | -4.7772483 | 3.4964023  |
| H | 5.6137201  | 4.9572963  | -1.0731316 |
| H | 6.5017624  | -0.1088517 | -3.0945657 |
| H | 0.6300999  | 4.5911086  | -5.0581592 |
| C | 5.4989290  | 4.0087353  | -0.5001679 |
| H | 4.9263856  | -2.3731776 | -1.4576661 |
| H | 5.3787178  | 5.1042711  | 1.4026504  |
| H | -0.3090978 | 4.8541963  | -2.6139921 |
| C | 4.6152649  | 3.1034507  | -1.3543494 |

|   |            |            |            |    |            |            |            |
|---|------------|------------|------------|----|------------|------------|------------|
| C | 5.6046067  | -0.6053911 | -3.5198169 | C  | -3.0154310 | -3.5011052 | -5.8317269 |
| C | 4.7923185  | 4.3590409  | 0.8261574  | C  | -2.2602178 | -2.3400554 | -5.8998792 |
| H | 4.6875497  | 3.4526735  | 1.4579073  | C  | -0.5038858 | -3.0933996 | -1.2367291 |
| C | 4.8672691  | 1.7336075  | -1.5412592 | C  | -0.8076513 | -2.5527534 | 0.0154354  |
| C | 1.5619815  | 4.1510722  | -4.6470302 | C  | -0.8070632 | -3.2906240 | 1.2374521  |
| H | 7.4242844  | 3.1786417  | -1.1723727 | C  | -0.4781006 | -4.6387003 | 1.1570659  |
| C | 3.4703030  | 3.6413452  | -1.9675867 | C  | -0.0624922 | -5.2408730 | -0.0661685 |
| C | 6.9008166  | 3.4477936  | -0.2326975 | C  | -0.0420899 | -4.4598479 | -1.2806048 |
| H | 7.5207227  | 4.1961448  | 0.3011230  | C  | 0.3617277  | -6.6032547 | -0.1077589 |
| H | 3.2641893  | 4.7148706  | -1.8361491 | C  | 0.8238919  | -7.1713647 | -1.2855368 |
| C | 4.7225110  | -1.3047998 | -1.2391699 | C  | 0.8884818  | -6.3898447 | -2.4701195 |
| H | 5.8747086  | -1.6582860 | -3.7442607 | C  | 0.4641329  | -5.0680038 | -2.4683344 |
| H | 5.3633630  | -0.0992506 | -4.4764008 | O  | -1.1878883 | -1.2151703 | 0.0910817  |
| C | 4.0118661  | 0.9138958  | -2.3039453 | P  | 0.0017989  | -0.1021579 | -0.0742572 |
| C | 0.7233487  | 4.5901538  | -2.3120298 | O  | -0.7377411 | 1.2352957  | -0.1360295 |
| C | 2.5600804  | 2.8634904  | -2.7039474 | Zn | -0.9793448 | 2.7805385  | 1.0571326  |
| H | 1.9410515  | 3.4097812  | -5.3774480 | Br | -3.0993370 | 3.7752882  | 1.1480896  |
| H | 2.3203807  | 4.9590701  | -4.5760381 | C  | -1.1779515 | -2.6222978 | 2.5274873  |
| C | 4.4174521  | -0.5414478 | -2.5386232 | C  | -0.1840881 | -2.3655052 | 3.5188731  |
| C | 2.8336864  | 1.4744801  | -2.8751572 | C  | -0.5806688 | -1.7767361 | 4.7320878  |
| C | 1.3030072  | 3.5287184  | -3.2611406 | C  | -1.9154245 | -1.4228439 | 5.0057746  |
| H | 3.8665286  | -1.2580271 | -0.5383126 | C  | -2.8657252 | -1.6489598 | 3.9983805  |
| H | 0.6899739  | 4.2068967  | -1.2735643 | C  | -2.5234314 | -2.2284452 | 2.7593088  |
| H | 5.6100512  | -0.8990842 | -0.7120785 | O  | 0.7074105  | -0.5297458 | -1.4856793 |
| H | 3.7770796  | 4.7694737  | 0.6574502  | C  | 1.2938296  | -2.6876481 | 3.2934434  |
| H | 1.3256997  | 5.5228616  | -2.3063863 | C  | 1.6762800  | -4.0566180 | 3.8894107  |
| H | 6.8555547  | 2.5433737  | 0.4089769  | C  | -3.6234879 | -2.4039883 | 1.7140210  |
| H | 3.5694303  | -1.0578878 | -3.0322889 | C  | -4.7017328 | -3.3946515 | 2.1903343  |
| H | 0.5294790  | 2.7405401  | -3.3720852 | C  | -2.2679205 | -0.8247885 | 6.3648298  |
| H | 5.7629933  | 1.2821428  | -1.0922105 | C  | -2.1908567 | -1.9051025 | 7.4630772  |
| H | -2.6915045 | 0.6512169  | 2.9476999  | C  | -0.0253409 | 1.8202168  | 3.0973903  |

### 7.2.2.8 to 15j-mi

#### TS1-8-j; COSMO

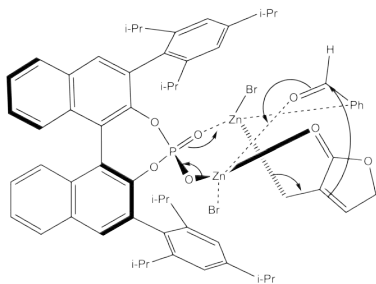

Energy(Hartree) = -11970.01695755

|   |            |            |            |   |            |            |            |
|---|------------|------------|------------|---|------------|------------|------------|
| C | 0.6089575  | 1.1467057  | -3.7228528 | H | -2.9546734 | 2.7674913  | 4.6257988  |
| C | 2.0288233  | 1.2092481  | -3.7597263 | H | 4.4098160  | 5.2079887  | 1.1313903  |
| C | 2.6539726  | 2.4677813  | -3.7384494 | H | 4.6055111  | 3.9004915  | 2.3649645  |
| C | 1.9212274  | 3.6668252  | -3.6891457 | H | 0.2460026  | 3.8765670  | -0.7117008 |
| C | 0.5191593  | 3.5779128  | -3.6530432 | H | -0.0425591 | 5.1264666  | 0.6620855  |
| C | -0.1588445 | 2.3422583  | -3.6667377 | H | 2.1726694  | 5.3187687  | 2.4853154  |
| C | 2.6209094  | 5.0220867  | -3.6864241 | H | -0.5183243 | -5.2593992 | 2.0645864  |
| C | 3.5536362  | 5.1907829  | -4.8986428 | H | -0.7813736 | -0.0802155 | -5.7569741 |
| C | 2.8892591  | -0.0467913 | -3.8798449 | H | 0.3306940  | -7.1913636 | 0.8229662  |
| C | 3.8840787  | -0.1924860 | -2.7179959 | H | 1.1559685  | -8.2206062 | -1.3013079 |
| C | -1.6873672 | 2.3285521  | -3.6737796 | H | 0.5274171  | -4.4721997 | -3.3895672 |
| C | -2.3033441 | 3.2011094  | -2.5708198 | H | 1.2836171  | -6.8334727 | -3.3967353 |
| C | -0.0782284 | -0.1839129 | -3.7245483 | H | -2.3147541 | -4.4621954 | -2.6104006 |
| C | -0.7659785 | -0.6718995 | -4.8288655 |   |            |            |            |
| C | -1.4877180 | -1.8989702 | -4.7833783 |   |            |            |            |
| C | -1.4669955 | -2.6957164 | -3.5794110 |   |            |            |            |
| C | -0.6596144 | -2.2596446 | -2.4638291 |   |            |            |            |
| C | -0.0471859 | -1.0042219 | -2.5550248 |   |            |            |            |
| C | -2.2799184 | -3.8687401 | -3.5343846 |   |            |            |            |
| C | -3.0351822 | -4.2605394 | -4.6314369 |   |            |            |            |

|   |            |            |            |    |            |            |            |
|---|------------|------------|------------|----|------------|------------|------------|
| H | -3.6590178 | -5.1651708 | -4.5669652 | C  | -0.1595034 | 2.3471317  | -3.6482308 |
| H | -3.6117617 | -3.8263672 | -6.6977826 | C  | 2.6154554  | 5.0312703  | -3.6792723 |
| H | -2.2560160 | -1.7274745 | -6.8152185 | C  | 3.5473406  | 5.2011423  | -4.8916595 |
| H | 0.1840726  | -1.5674323 | 5.4967461  | C  | 2.8913808  | -0.0363404 | -3.8821398 |
| H | -3.9138504 | -1.3610295 | 4.1672075  | C  | 3.9035520  | -0.1763457 | -2.7349526 |
| H | -4.7644286 | -0.5693759 | 2.1581410  | C  | -1.6881252 | 2.3285087  | -3.6508008 |
| H | -4.9743529 | -1.1843759 | 0.4921242  | C  | -2.3080760 | 3.2179455  | -2.5640505 |
| H | -3.4566525 | -0.3470557 | 0.9488888  | C  | -0.0735959 | -0.1786510 | -3.7156985 |
| H | -3.1650824 | -2.8429974 | 0.8052663  | C  | -0.7542822 | -0.6683097 | -4.8233222 |
| H | -5.2269750 | -3.0215805 | 3.0945153  | C  | -1.4723439 | -1.8973265 | -4.7829844 |
| H | -4.2591298 | -4.3801568 | 2.4409707  | C  | -1.4550649 | -2.6946892 | -3.5797055 |
| H | -5.4657577 | -3.5513146 | 1.4009700  | C  | -0.6539372 | -2.2575227 | -2.4601593 |
| H | -3.7636524 | 0.3941687  | 7.3855896  | C  | -0.0444008 | -1.0003575 | -2.5471291 |
| H | -4.4656691 | -0.8198382 | 6.2810724  | C  | -2.2642142 | -3.8702031 | -3.5399031 |
| H | -3.7111571 | 0.6610936  | 5.6144387  | C  | -3.0116691 | -4.2639212 | -4.6410339 |
| H | -1.4800367 | -0.0684809 | 6.5858173  | C  | -2.9883984 | -3.5039446 | -5.8401947 |
| H | -2.3738548 | -1.4664688 | 8.4659025  | C  | -2.2373484 | -2.3405626 | -5.9031322 |
| H | -1.1989558 | -2.3993778 | 7.4805378  | C  | -0.5013510 | -3.0918044 | -1.2332085 |
| H | -2.9547230 | -2.6915435 | 7.2877766  | C  | -0.8093988 | -2.5517259 | 0.0181813  |
| H | 3.2629242  | -1.7531607 | 3.4644417  | C  | -0.8102274 | -3.2903263 | 1.2397600  |
| H | 2.2916905  | -1.6303547 | 4.9589924  | C  | -0.4815274 | -4.6381500 | 1.1589553  |
| H | 1.9068743  | -0.5840975 | 3.5694918  | C  | -0.0627417 | -5.2399390 | -0.0629426 |
| H | 1.4574606  | -2.7292934 | 2.1965595  | C  | -0.0383713 | -4.4578195 | -1.2762873 |
| H | 2.7474248  | -4.2774154 | 3.7022652  | C  | 0.3614050  | -6.6017897 | -0.1049969 |
| H | 1.0794342  | -4.8826268 | 3.4576850  | C  | 0.8269421  | -7.1688461 | -1.2812751 |
| H | 1.5128202  | -4.0633620 | 4.9877824  | C  | 0.8955092  | -6.3863534 | -2.4642613 |
| H | 1.8252726  | 5.7954269  | -3.7660364 | C  | 0.4719317  | -5.0647717 | -2.4625429 |
| H | 4.3080990  | 0.7544113  | -5.3616916 | O  | -1.1936173 | -1.2155040 | 0.0935665  |
| H | -3.3338522 | 2.6680744  | -5.0865113 | P  | -0.0060720 | -0.0989165 | -0.0671204 |
| H | 4.4679517  | -1.1304496 | -2.8178288 | O  | -0.7518416 | 1.2356610  | -0.1352568 |
| H | 3.8853383  | 6.2557018  | -2.3794167 | Zn | -1.0061030 | 2.7868028  | 1.0379391  |
| H | -3.4097411 | 3.1269800  | -2.5856274 | Br | -3.0875950 | 3.8279227  | 1.1734877  |
| H | 4.1432381  | 4.4913271  | -2.1862828 | C  | -1.1821521 | -2.6222776 | 2.5294098  |
| H | 3.0100125  | 5.0248714  | -5.8504944 | C  | -0.1881297 | -2.3615331 | 3.5193324  |
| H | 3.9885824  | 6.2114286  | -4.9225490 | C  | -0.5857231 | -1.7689509 | 4.7301490  |
| H | -0.0674665 | 4.5110087  | -3.6246794 | C  | -1.9206107 | -1.4160655 | 5.0027907  |
| H | 4.1747777  | -1.0320553 | -5.3595271 | C  | -2.8709784 | -1.6475803 | 3.9971293  |
| H | 2.8687255  | -0.0320333 | -6.0818688 | C  | -2.5282360 | -2.2310401 | 2.7604165  |
| H | -1.8281842 | 2.0716464  | -5.8610962 | O  | 0.7057306  | -0.5254594 | -1.4752666 |
| H | -1.9369292 | 3.7706164  | -5.3129566 | C  | 1.2900176  | -2.6831879 | 3.2946643  |
| H | 3.3641083  | -0.2196628 | -1.7436265 | C  | 1.6721823  | -4.0535201 | 3.8873593  |
| H | -1.9708399 | 2.8712961  | -1.5701224 | C  | -3.6282645 | -2.4152374 | 1.7166507  |
| H | 4.6077614  | 0.6481555  | -2.6837103 | C  | -4.7001776 | -3.4102573 | 2.1977955  |
| H | 2.6758701  | 5.2652020  | -1.5048716 | C  | -2.2738263 | -0.8152529 | 6.3604553  |
| H | -2.0473603 | 4.2749687  | -2.6858194 | C  | -2.2052904 | -1.8950632 | 7.4594567  |
| H | 4.3979279  | 4.4711259  | -4.8636703 | C  | -0.0261179 | 1.8172218  | 3.1058144  |
| H | 2.2118935  | -0.9245431 | -3.8427321 | C  | -1.3747339 | 1.7788981  | 3.5233252  |
| H | -2.0121634 | 1.2866007  | -3.4763904 | C  | -1.8950953 | 2.8192877  | 4.3109921  |
| H | 3.7545327  | 2.5094297  | -3.7669315 | C  | -1.0673608 | 3.8892470  | 4.6887829  |
| H | 2.8639097  | 3.4449235  | 3.9491737  | C  | 0.2771742  | 3.9223481  | 4.2916768  |
|   |            |            |            | C  | 0.8209887  | 2.8828604  | 3.5092728  |
|   |            |            |            | C  | 2.2787460  | 2.8539961  | 3.1871998  |
|   |            |            |            | C  | 2.5090058  | 4.4244690  | 1.8819729  |
|   |            |            |            | C  | 1.7684370  | 3.9704678  | 0.7569117  |
|   |            |            |            | C  | 2.6765384  | 2.9532069  | 0.1394231  |
|   |            |            |            | O  | 3.9516600  | 3.2197140  | 0.4927717  |
|   |            |            |            | C  | 3.9685629  | 4.2344479  | 1.5206460  |
|   |            |            |            | C  | 0.4652941  | 4.2081648  | 0.3152899  |
|   |            |            |            | O  | 2.3791577  | 1.9317810  | -0.4702512 |
|   |            |            |            | O  | 2.8499097  | 1.8019373  | 2.7012232  |
|   |            |            |            | Zn | 2.8832850  | 0.4038519  | 1.2843136  |
|   |            |            |            | O  | 1.0623329  | -0.2957813 | 1.0204459  |
|   |            |            |            | Br | 4.7947308  | -0.8306679 | 0.9783368  |
|   |            |            |            | C  | -4.2471474 | -1.0654794 | 1.3055865  |
|   |            |            |            | C  | -3.6253913 | -0.0921871 | 6.3989334  |
|   |            |            |            | C  | 2.2316154  | -1.6030408 | 3.8551720  |
|   |            |            |            | C  | 3.3677364  | 5.2829907  | -2.3591365 |
|   |            |            |            | C  | 3.5779703  | -0.0833929 | -5.2605587 |
|   |            |            |            | C  | -2.2301971 | 2.7037265  | -5.0438780 |
|   |            |            |            | H  | -2.0034081 | 0.9201978  | 3.2411054  |
|   |            |            |            | H  | 0.4097831  | 0.9578527  | 2.5750938  |

### TS1-8-j

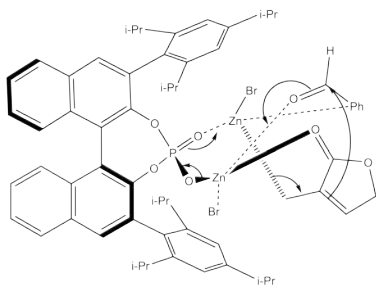

Energy(Hartree)= -11970.00327621  
number of imaginary frequencies: 1

|   |           |           |            |
|---|-----------|-----------|------------|
| C | 0.6106150 | 1.1535433 | -3.7114493 |
| C | 2.0297852 | 1.2180348 | -3.7553711 |
| C | 2.6524014 | 2.4776481 | -3.7355375 |
| C | 1.9179449 | 3.6747995 | -3.6801799 |
| C | 0.5164127 | 3.5835762 | -3.6357390 |

|   |            |            |            |
|---|------------|------------|------------|
| H | 0.9234004  | 4.7545545  | 4.6157557  |
| H | -1.4757770 | 4.7068040  | 5.3016537  |
| H | -2.9506629 | 2.8012551  | 4.6166115  |
| H | 4.4294128  | 5.1574976  | 1.1059472  |
| H | 4.6086617  | 3.8445204  | 2.3381197  |
| H | 0.2369878  | 3.8777611  | -0.7164609 |
| H | -0.0402220 | 5.1241203  | 0.6628577  |
| H | 2.1958373  | 5.3026564  | 2.4669106  |
| H | -0.5241035 | -5.2578991 | 2.0670098  |
| H | -0.7656174 | -0.0753900 | -5.7506255 |
| H | 0.3282201  | -7.1904067 | 0.8253201  |
| H | 1.1592425  | -8.2179595 | -1.2967023 |
| H | 0.5381128  | -4.4670992 | -3.3822037 |
| H | 1.2938808  | -6.8288191 | -3.3899706 |
| H | -2.3007125 | -4.4640159 | -2.6163456 |
| H | -3.6322526 | -5.1709872 | -4.5804195 |
| H | -3.5788272 | -3.8305291 | -6.7097180 |
| H | -2.2306929 | -1.7268897 | -6.8176988 |
| H | 0.1791625  | -1.5558581 | 5.4936452  |
| H | -3.9198305 | -1.3621880 | 4.1655920  |
| H | -4.7783383 | -0.5837930 | 2.1531245  |
| H | -4.9870283 | -1.2074791 | 0.4911568  |
| H | -3.4736198 | -0.3612719 | 0.9409112  |
| H | -3.1679440 | -2.8553287 | 0.8093788  |
| H | -5.2266128 | -3.0375388 | 3.1013405  |
| H | -4.2518626 | -4.3920005 | 2.4522028  |
| H | -5.4647034 | -3.5745024 | 1.4105388  |
| H | -3.7676069 | 0.4122143  | 7.3758494  |
| H | -4.4713241 | -0.7994080 | 6.2712653  |
| H | -3.7076636 | 0.6764278  | 5.6043761  |
| H | -1.4835437 | -0.0617498 | 6.5829864  |
| H | -2.3885610 | -1.4564764 | 8.4622646  |
| H | -1.2165615 | -2.3951827 | 7.4787141  |
| H | -2.9718335 | -2.6780918 | 7.2818637  |
| H | 3.2584423  | -1.7463500 | 3.4628298  |
| H | 2.2946686  | -1.6361705 | 4.9630318  |
| H | 1.9011468  | -0.5805216 | 3.5837969  |
| H | 1.4555222  | -2.7228578 | 2.1980037  |
| H | 2.7439046  | -4.2720203 | 3.7019931  |
| H | 1.0781962  | -4.8790402 | 3.4511613  |
| H | 1.5052726  | -4.0647889 | 4.9851159  |
| H | 1.8182989  | 5.8032205  | -3.7596280 |
| H | 4.2837856  | 0.7639001  | -5.3893644 |
| H | -3.3378663 | 2.6401008  | -5.0668622 |
| H | 4.4860789  | -1.1144341 | -2.8380438 |
| H | 3.8784368  | 6.2685615  | -2.3732406 |
| H | -3.4134988 | 3.1334118  | -2.5710277 |
| H | 4.1377653  | 4.5043156  | -2.1781283 |
| H | 3.0043969  | 5.0301975  | -5.8426969 |
| H | 3.9792462  | 6.2229838  | -4.9187559 |
| H | -0.0718519 | 4.5154862  | -3.6037963 |
| H | 4.1572425  | -1.0225567 | -5.3781569 |
| H | 2.8367787  | -0.0294796 | -6.0839629 |
| H | -1.8318494 | 2.0360804  | -5.8340003 |
| H | -1.9439401 | 3.7420906  | -5.3130588 |
| H | 3.4003035  | -0.2003925 | -1.7519033 |
| H | -1.9708787 | 2.9132071  | -1.5571714 |
| H | 4.6287345  | 0.6633739  | -2.7144366 |
| H | 2.6697235  | 5.2762621  | -1.4979725 |
| H | -2.0643831 | 4.2919376  | -2.7014899 |
| H | 4.3940275  | 4.4845779  | -4.8560126 |
| H | 2.2163583  | -0.9152457 | -3.8319117 |
| H | -2.0083834 | 1.2886362  | -3.4351967 |
| H | 3.7526678  | 2.5204783  | -3.7697172 |
| H | 2.8798884  | 3.4216029  | 3.9422360  |

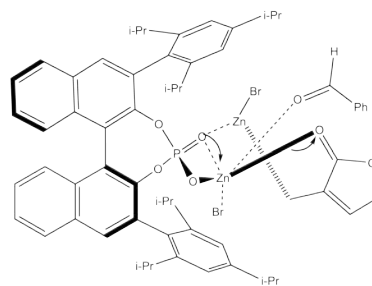

Energy(Hartree)=-11969.992637

|    |           |           |           |
|----|-----------|-----------|-----------|
| C  | -2.476856 | -4.106482 | -1.496940 |
| C  | 1.763083  | -4.152716 | -1.781242 |
| C  | -1.776551 | -2.885677 | -1.552449 |
| C  | -0.404777 | -5.336804 | -1.772946 |
| C  | 0.311750  | -4.113773 | -1.754515 |
| C  | -1.795191 | -5.331428 | -1.621954 |
| C  | -0.385299 | -2.884965 | -1.672133 |
| O  | 2.535709  | -3.229219 | -1.463307 |
| H  | -3.568926 | -4.091163 | -1.360936 |
| H  | 0.143896  | -6.286942 | -1.872871 |
| H  | -2.319918 | -1.935219 | -1.486562 |
| H  | -2.352903 | -6.279531 | -1.607903 |
| H  | 0.171120  | -1.941103 | -1.743973 |
| Br | -3.537793 | -1.123362 | 1.059177  |
| Zn | -1.528993 | -2.285765 | 1.451371  |
| H  | 2.738962  | -6.446169 | 2.363525  |
| H  | -1.262209 | -3.831010 | 3.326602  |
| C  | 0.881332  | -5.629740 | 1.544515  |
| C  | 2.366458  | -5.586683 | 1.758224  |
| H  | 0.363076  | -6.465492 | 1.054131  |
| C  | 0.308067  | -4.531317 | 2.108175  |
| C  | -1.078274 | -4.068878 | 2.255287  |
| C  | 1.423662  | -3.715170 | 2.680799  |
| O  | 2.615666  | -4.374671 | 2.470223  |
| O  | 1.364361  | -2.644454 | 3.247688  |
| H  | 2.968131  | -5.570004 | 0.818837  |
| H  | -1.814589 | -4.829344 | 1.931598  |
| C  | -0.674225 | 1.883449  | -1.532199 |
| C  | -0.684909 | 3.081457  | -0.809077 |
| C  | -0.465342 | 4.311669  | -1.536251 |
| C  | -0.268914 | 5.568265  | -0.887291 |
| C  | -0.411160 | 4.276611  | -2.977351 |
| C  | -0.232661 | 5.492909  | -3.702116 |
| C  | -0.519577 | 3.027152  | -3.649705 |
| H  | -0.518029 | 3.012972  | -4.750401 |
| C  | -0.609201 | 1.824812  | -2.959023 |
| C  | -0.125544 | 2.390638  | 2.935597  |
| C  | -1.033333 | 3.284684  | 3.496193  |
| H  | -1.060530 | 3.397343  | 4.590835  |
| C  | -1.965457 | 4.017653  | 2.708532  |
| C  | -2.958981 | 4.842914  | 3.315796  |
| C  | -1.930502 | 3.901948  | 1.270996  |
| C  | -2.934952 | 4.573899  | 0.512615  |
| C  | -0.902182 | 3.090865  | 0.665238  |
| C  | -0.096731 | 2.319337  | 1.507107  |
| O  | -0.808304 | 0.667429  | -0.853341 |
| O  | 0.858476  | 1.482775  | 0.928874  |
| P  | 0.431165  | 0.154638  | 0.088539  |
| O  | 1.677250  | -0.148267 | -0.795968 |
| O  | -0.023254 | -1.031533 | 0.924884  |
| C  | -0.074186 | 6.700183  | -3.039967 |
| C  | -0.075915 | 6.730853  | -1.620252 |
| H  | -0.208655 | 5.449677  | -4.802416 |
| H  | 0.069034  | 7.630846  | -3.609911 |
| H  | -0.259623 | 5.608257  | 0.210347  |
| H  | 0.081924  | 7.684753  | -1.094317 |

### 7.2.2.9 to 15o-mi

TS1-8-o; woelfling data



|   |           |           |           |
|---|-----------|-----------|-----------|
| C | -3.901083 | 5.351286  | 1.135874  |
| C | -3.906883 | 5.501497  | 2.547957  |
| H | -2.947846 | 4.458246  | -0.580143 |
| H | -4.673575 | 5.848805  | 0.529862  |
| H | -4.674050 | 6.125950  | 3.030517  |
| H | -2.968508 | 4.929769  | 4.413607  |
| C | 0.461170  | -0.115757 | -4.192389 |
| C | -0.706356 | 0.517575  | -3.685170 |
| C | 0.315060  | -1.326775 | -4.895367 |
| C | -1.988646 | -0.058196 | -3.902110 |
| C | -2.076377 | -1.266557 | -4.618773 |
| C | -0.938005 | -1.919404 | -5.124162 |
| H | 1.211218  | -1.825066 | -5.298713 |
| C | -3.267047 | 0.653940  | -3.456945 |
| H | -3.071844 | -1.704386 | -4.794950 |
| C | -4.202911 | -0.224532 | -2.613608 |
| H | -4.508234 | -1.149010 | -3.147438 |
| H | -5.129850 | 0.330727  | -2.363697 |
| H | -3.738989 | -0.510662 | -1.649153 |
| C | -3.997297 | 1.243501  | -4.679166 |
| H | -2.968517 | 1.508862  | -2.816713 |
| H | -4.340293 | 0.442368  | -5.367162 |
| H | -3.337935 | 1.922806  | -5.256645 |
| H | -4.890304 | 1.819390  | -4.359387 |
| C | -1.042422 | -3.199952 | -5.944633 |
| C | -1.859580 | -4.295464 | -5.243547 |
| H | -1.858001 | -5.230576 | -5.840735 |
| H | -2.919115 | -3.993474 | -5.108574 |
| H | -1.449693 | -4.525976 | -4.241826 |
| C | -1.592027 | -2.908159 | -7.353495 |
| H | -0.004884 | -3.584078 | -6.065376 |
| H | -1.604793 | -3.829174 | -7.972809 |
| H | -0.977731 | -2.148220 | -7.876499 |
| H | -2.631156 | -2.521282 | -7.300944 |
| C | 1.843551  | 0.521471  | -4.057389 |
| C | 2.961852  | -0.488440 | -3.757232 |
| H | 3.905931  | 0.041575  | -3.518094 |
| H | 3.172268  | -1.154623 | -4.619468 |
| H | 2.700004  | -1.132213 | -2.897040 |
| C | 2.190302  | 1.324270  | -5.327983 |
| H | 1.800545  | 1.227243  | -3.202603 |
| H | 3.177203  | 1.820890  | -5.225127 |
| H | 1.436578  | 2.106780  | -5.540936 |
| H | 2.235506  | 0.654543  | -6.212553 |
| H | 2.545521  | -2.055247 | 6.443926  |
| H | 4.274056  | 3.206649  | 4.484445  |
| H | -2.948775 | 0.706880  | 6.276263  |
| C | 3.241959  | -1.335108 | 5.959600  |
| H | 4.342761  | 2.994429  | 1.300474  |
| H | 4.750372  | -2.882504 | 5.614188  |
| H | -2.921549 | -1.085218 | 4.272786  |
| C | 2.375654  | -0.335836 | 5.204212  |
| C | 3.487519  | 3.687031  | 3.865752  |
| C | 4.167715  | -2.139077 | 5.030834  |
| H | 4.895516  | -1.480893 | 4.512379  |
| C | 2.942468  | 0.643015  | 4.370421  |
| C | -1.842879 | 0.764770  | 6.201779  |
| H | 3.378811  | -0.077023 | 7.764650  |
| C | 0.980073  | -0.347491 | 5.334445  |
| C | 4.042278  | -0.635777 | 7.073954  |
| H | 4.621164  | -1.373605 | 7.667864  |
| H | 0.521570  | -1.113442 | 5.980390  |
| C | 3.901365  | 2.153948  | 1.875093  |
| H | 3.952238  | 4.537917  | 3.325187  |
| H | 2.722741  | 4.093806  | 4.558288  |
| C | 2.160767  | 1.567165  | 3.658618  |
| C | -1.824641 | -1.035415 | 4.420547  |
| C | 0.144504  | 0.537954  | 4.630285  |
| H | -1.531033 | 1.792583  | 6.478289  |
| H | -1.419029 | 0.076069  | 6.962620  |
| C | 2.863698  | 2.678607  | 2.880414  |

|    |           |           |           |
|----|-----------|-----------|-----------|
| C  | 0.741223  | 1.497929  | 3.762890  |
| C  | -1.368003 | 0.383232  | 4.788384  |
| H  | 3.441166  | 1.449905  | 1.155622  |
| H  | -1.331193 | -1.338027 | 3.475834  |
| H  | 4.734892  | 1.621077  | 2.376576  |
| H  | 3.590407  | -2.669946 | 4.252037  |
| H  | -1.531244 | -1.787499 | 5.181062  |
| H  | 4.765877  | 0.088487  | 6.643935  |
| H  | 2.096912  | 3.233866  | 2.302896  |
| H  | -1.861595 | 1.066433  | 4.069716  |
| Zn | 2.825956  | -1.583030 | -0.262507 |
| Br | 4.684515  | -1.861638 | 0.997497  |
| H  | 4.038229  | 0.690179  | 4.271030  |
| H  | 2.227461  | -5.118484 | -2.111169 |

### TS2-8-o; woelfling data

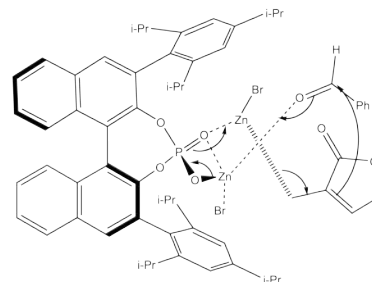

Energy(Hartree)= -11969.982768

|    |           |           |           |
|----|-----------|-----------|-----------|
| C  | -3.081805 | -4.435759 | -0.949272 |
| C  | 0.694595  | -4.090523 | -2.886077 |
| C  | -2.463349 | -3.179090 | -1.061134 |
| C  | -1.240168 | -5.473639 | -2.140026 |
| C  | -0.604185 | -4.210497 | -2.237778 |
| C  | -2.470657 | -5.585381 | -1.486369 |
| C  | -1.228858 | -3.064383 | -1.699058 |
| O  | 1.407611  | -3.066562 | -2.913192 |
| H  | -4.058777 | -4.515911 | -0.448791 |
| H  | -0.749245 | -6.370829 | -2.551672 |
| H  | -2.945964 | -2.279193 | -0.666604 |
| H  | -2.959182 | -6.566520 | -1.390690 |
| H  | -0.758512 | -2.079259 | -1.818718 |
| Br | -0.659878 | -1.368526 | 3.536230  |
| Zn | 0.330189  | -2.670980 | 1.880288  |
| H  | 3.945566  | -6.273012 | -1.142255 |
| H  | 0.408357  | -5.079382 | 2.195917  |
| C  | 1.954817  | -5.449611 | -0.710023 |
| C  | 3.428744  | -5.306776 | -0.953875 |
| H  | 1.295996  | -6.042680 | -1.352406 |
| C  | 1.628225  | -4.847542 | 0.470975  |
| C  | 0.389538  | -4.574418 | 1.205563  |
| C  | 2.928270  | -4.433647 | 1.088100  |
| O  | 3.956716  | -4.720318 | 0.239333  |
| O  | 3.087628  | -3.941669 | 2.186472  |
| H  | 3.664190  | -4.616454 | -1.799562 |
| H  | -0.529465 | -4.869032 | 0.665135  |
| C  | -1.792961 | 1.476287  | 0.013583  |
| C  | -1.444897 | 2.519410  | 0.878030  |
| C  | -2.002854 | 3.830510  | 0.626455  |
| C  | -1.564375 | 5.003918  | 1.312966  |
| C  | -3.010750 | 3.981780  | -0.392091 |
| C  | -3.590609 | 5.264526  | -0.625842 |
| C  | -3.389800 | 2.850004  | -1.161745 |
| H  | -4.184655 | 2.957143  | -1.916016 |
| C  | -2.779061 | 1.609869  | -1.008848 |
| C  | 1.916306  | 1.990436  | 2.609910  |
| C  | 1.636346  | 2.511087  | 3.870697  |

|   |           |           |           |    |          |           |           |
|---|-----------|-----------|-----------|----|----------|-----------|-----------|
| H | 2.462446  | 2.640300  | 4.585960  | C  | 7.370902 | -0.394238 | -0.329502 |
| C | 0.313739  | 2.829295  | 4.285505  | H  | 7.075417 | 0.376958  | -1.071200 |
| C | 0.031776  | 3.231141  | 5.625272  | C  | 5.221027 | 1.616185  | 0.750564  |
| C | -0.767712 | 2.739754  | 3.336365  | C  | 3.918989 | 0.093536  | 5.502230  |
| C | -2.090744 | 3.029600  | 3.781857  | H  | 8.245983 | 1.612750  | 2.412635  |
| C | -0.468859 | 2.341535  | 1.984486  | C  | 5.191728 | 0.069476  | 2.590532  |
| C | 0.816730  | 1.876437  | 1.709557  | C  | 8.290134 | 1.256487  | 1.363882  |
| O | -1.199880 | 0.209360  | 0.175572  | H  | 9.322991 | 0.907458  | 1.156483  |
| O | 1.090713  | 1.368355  | 0.436236  | H  | 5.674897 | -0.738690 | 3.163234  |
| P | 0.390064  | 0.035968  | -0.163877 | C  | 3.316657 | 3.000448  | -1.207392 |
| O | 0.714776  | 0.034555  | -1.679248 | H  | 3.720552 | 5.436629  | 0.092760  |
| O | 0.887852  | -1.324015 | 0.401369  | H  | 4.154218 | 4.779486  | 1.707430  |
| C | -3.163825 | 6.376322  | 0.082216  | C  | 3.950287 | 2.101450  | 1.097037  |
| C | -2.127617 | 6.243147  | 1.044147  | C  | 3.090266 | -1.675335 | 3.878768  |
| H | -4.373350 | 5.354241  | -1.395362 | C  | 3.913683 | 0.512321  | 2.983735  |
| H | -3.611148 | 7.363060  | -0.111352 | H  | 3.966716 | 1.177993  | 5.732830  |
| H | -0.757371 | 4.924217  | 2.053115  | H  | 4.959610 | -0.292709 | 5.506225  |
| H | -1.760780 | 7.132415  | 1.578850  | C  | 3.377584 | 3.276812  | 0.304822  |
| C | -2.333573 | 3.402925  | 5.096428  | C  | 3.282717 | 1.535816  | 2.222491  |
| C | -1.264857 | 3.513641  | 6.025722  | C  | 3.224506 | -0.179117 | 4.158760  |
| H | -2.925808 | 2.936320  | 3.072799  | H  | 2.747484 | 2.075666  | -1.422990 |
| H | -3.364426 | 3.606447  | 5.424128  | H  | 2.674167 | -1.824234 | 2.865848  |
| H | -1.470409 | 3.810160  | 7.065536  | H  | 4.329293 | 2.885133  | -1.646335 |
| H | 0.866494  | 3.293325  | 6.340920  | H  | 6.711833 | -1.269361 | -0.483423 |
| C | -2.664430 | 0.231485  | -3.131000 | H  | 4.059678 | -2.211281 | 3.888238  |
| C | -3.251325 | 0.471535  | -1.859056 | H  | 8.090913 | 2.127765  | 0.705134  |
| C | -3.254300 | -0.735483 | -3.966280 | H  | 2.339032 | 3.454834  | 0.647340  |
| C | -4.391068 | -0.266523 | -1.435924 | H  | 2.190304 | 0.209218  | 4.230578  |
| C | -4.939911 | -1.220549 | -2.313558 | Zn | 1.950364 | -1.547624 | -1.668376 |
| C | -4.399872 | -1.455455 | -3.590857 | Br | 4.220732 | -1.591794 | -1.531932 |
| H | -2.822988 | -0.917096 | -4.963286 | H  | 5.733202 | 2.055539  | -0.119999 |
| C | -5.029249 | -0.031701 | -0.064755 | H  | 1.056100 | -4.983751 | -3.456230 |
| H | -5.830621 | -1.785082 | -1.994291 |    |          |           |           |
| C | -4.718431 | -1.168743 | 0.927946  |    |          |           |           |
| H | -5.100470 | -2.144860 | 0.558969  |    |          |           |           |
| H | -5.201182 | -0.973534 | 1.907252  |    |          |           |           |
| H | -3.630277 | -1.265450 | 1.118949  |    |          |           |           |
| C | -6.541245 | 0.227921  | -0.169942 |    |          |           |           |
| H | -4.573474 | 0.887251  | 0.355957  |    |          |           |           |
| H | -7.093533 | -0.666371 | -0.526646 |    |          |           |           |
| H | -6.757451 | 1.057888  | -0.872734 |    |          |           |           |
| H | -6.959166 | 0.498322  | 0.821181  |    |          |           |           |
| C | -5.054413 | -2.427678 | -4.563854 |    |          |           |           |
| C | -5.019476 | -3.876140 | -4.049147 |    |          |           |           |
| H | -5.462174 | -4.571391 | -4.792121 |    |          |           |           |
| H | -5.596830 | -3.982509 | -3.106736 |    |          |           |           |
| H | -3.981388 | -4.204562 | -3.841899 |    |          |           |           |
| C | -6.485585 | -1.980720 | -4.913617 |    |          |           |           |
| H | -4.455848 | -2.392562 | -5.500886 |    |          |           |           |
| H | -6.935959 | -2.645653 | -5.679159 |    |          |           |           |
| H | -6.495670 | -0.944513 | -5.307661 |    |          |           |           |
| H | -7.144480 | -2.003659 | -4.020592 |    |          |           |           |
| C | -1.478430 | 1.052844  | -3.632017 |    |          |           |           |
| C | -0.482508 | 0.238516  | -4.473706 |    |          |           |           |
| H | 0.444580  | 0.824283  | -4.634193 |    |          |           |           |
| H | -0.889722 | -0.014299 | -5.474929 |    |          |           |           |
| H | -0.195253 | -0.704525 | -3.969650 |    |          |           |           |
| C | -1.957100 | 2.292297  | -4.412609 |    |          |           |           |
| H | -0.925743 | 1.412204  | -2.741759 |    |          |           |           |
| H | -1.090258 | 2.898054  | -4.748672 |    |          |           |           |
| H | -2.601567 | 2.943285  | -3.790332 |    |          |           |           |
| H | -2.538023 | 1.995879  | -5.310878 |    |          |           |           |
| H | 7.515720  | -0.709996 | 1.792410  |    |          |           |           |
| H | 5.222831  | 4.478424  | 0.304113  |    |          |           |           |
| H | 3.371716  | -0.408349 | 6.327027  |    |          |           |           |
| C | 7.267802  | 0.133227  | 1.110786  |    |          |           |           |
| H | 2.820782  | 3.840812  | -1.736158 |    |          |           |           |
| H | 8.411800  | -0.700192 | -0.562375 |    |          |           |           |
| H | 2.411824  | -2.168621 | 4.602895  |    |          |           |           |
| C | 5.864248  | 0.600072  | 1.479689  |    |          |           |           |
| C | 4.162185  | 4.564939  | 0.619414  |    |          |           |           |

### int1-8-o

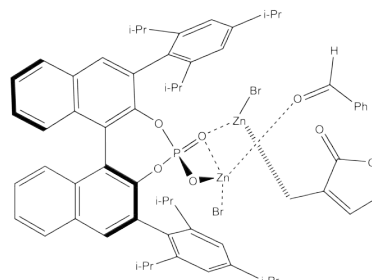

Energy(Hartree)= -11970.00275888

|    |            |            |            |
|----|------------|------------|------------|
| C  | -2.6275804 | -4.1399724 | 0.0597321  |
| C  | 1.0958751  | -4.2358683 | -1.9909559 |
| C  | -2.0702367 | -2.9403550 | -0.4207452 |
| C  | -0.8027170 | -5.4103795 | -0.9137370 |
| C  | -0.2091154 | -4.2005275 | -1.3522398 |
| C  | -2.0023503 | -5.3748434 | -0.1948846 |
| C  | -0.8661048 | -2.9683460 | -1.1258666 |
| O  | 1.8662520  | -3.2675456 | -2.1376333 |
| H  | -3.5662980 | -4.1049653 | 0.6331986  |
| H  | -0.2975406 | -6.3696192 | -1.1103731 |
| H  | -2.5651904 | -1.9797481 | -0.2369001 |
| H  | -2.4542843 | -6.3087331 | 0.1703987  |
| H  | -0.4488753 | -2.0454716 | -1.5476267 |
| Br | -1.9585101 | -0.7139669 | 2.4891113  |
| Zn | -0.0780186 | -2.0252785 | 1.9818506  |
| H  | 4.5343040  | -5.7958523 | 1.0699207  |
| H  | 0.5715137  | -3.9462340 | 3.4235873  |
| C  | 2.5436308  | -4.9024712 | 0.8895418  |
| C  | 4.0385575  | -4.8103058 | 0.9147614  |
| H  | 1.9933579  | -5.5573290 | 0.2007404  |
| C  | 2.0144155  | -4.1319410 | 1.8801211  |
| C  | 0.6337378  | -3.8711164 | 2.3167813  |
| C  | 3.1809158  | -3.5312078 | 2.6117676  |

|   |            |            |            |    |            |            |            |
|---|------------|------------|------------|----|------------|------------|------------|
| O | 4.3444614  | -3.9600307 | 2.0216584  | H  | 0.9072872  | -1.6520108 | -3.8226062 |
| O | 3.1758217  | -2.8003961 | 3.5809639  | C  | -0.7592578 | 0.7556852  | -5.7440983 |
| H | 4.4656533  | -4.3481957 | -0.0054326 | H  | -0.0643377 | 0.6881569  | -3.7018017 |
| H | -0.0823169 | -4.5906623 | 1.8719106  | H  | 0.1536131  | 1.2433806  | -6.1439046 |
| C | -1.4428709 | 1.5770792  | -1.2250541 | H  | -1.5134043 | 1.5462321  | -5.5633040 |
| C | -1.2741971 | 2.8332637  | -0.6337597 | H  | -1.1595927 | 0.0808160  | -6.5295629 |
| C | -1.6348836 | 3.9968627  | -1.4110215 | H  | 5.7039253  | -1.0380191 | 4.5661428  |
| C | -1.3248629 | 5.3259463  | -0.9925990 | H  | 5.5417603  | 4.0729794  | 1.6677722  |
| C | -2.3042080 | 3.8191688  | -2.6757105 | H  | 0.1997447  | 1.1074030  | 6.5932759  |
| C | -2.6799657 | 4.9663668  | -3.4362397 | C  | 5.9954681  | -0.3015792 | 3.7863993  |
| C | -2.5788243 | 2.5018731  | -3.1383117 | H  | 4.2051136  | 3.4508454  | -1.1547517 |
| H | -3.1525586 | 2.3712298  | -4.0686744 | H  | 7.4882018  | -1.6461359 | 2.9218001  |
| C | -2.1404664 | 1.3741730  | -2.4541939 | H  | -0.1338365 | -1.1127273 | 5.1958575  |
| C | 1.0828244  | 2.5866505  | 2.3994556  | C  | 4.7285118  | 0.4570145  | 3.4137674  |
| C | 0.4169570  | 3.4156794  | 3.2971439  | C  | 4.4971870  | 4.3825801  | 1.4554650  |
| H | 0.8855319  | 3.6287284  | 4.2685088  | C  | 6.5770604  | -1.0961645 | 2.6059316  |
| C | -0.8735440 | 3.9516925  | 3.0309027  | H  | 6.8653720  | -0.4295479 | 1.7664049  |
| C | -1.5775652 | 4.7056352  | 4.0171262  | C  | 4.7097376  | 1.3988299  | 2.3709342  |
| C | -1.5004398 | 3.7003317  | 1.7572343  | C  | 1.1241745  | 1.3250462  | 6.0189039  |
| C | -2.8339788 | 4.1648421  | 1.5549992  | H  | 6.6322835  | 1.1947256  | 5.2726719  |
| C | -0.7592413 | 2.9726880  | 0.7559602  | C  | 3.5395414  | 0.2541027  | 4.1293240  |
| C | 0.4566830  | 2.4005511  | 1.1293218  | C  | 7.0415687  | 0.6491959  | 4.3981159  |
| O | -0.9786058 | 0.4284320  | -0.5622472 | H  | 7.9407202  | 0.0891519  | 4.7299370  |
| O | 1.1631682  | 1.6616046  | 0.1756000  | H  | 3.5397260  | -0.4959768 | 4.9331557  |
| P | 0.6389349  | 0.2500923  | -0.4132525 | C  | 4.1970833  | 2.6514780  | -0.3851381 |
| O | 1.3699929  | 0.0114122  | -1.7528132 | H  | 4.5323083  | 5.1943861  | 0.6990710  |
| O | 0.9310429  | -0.9852338 | 0.4954289  | H  | 4.0767383  | 4.8015571  | 2.3922246  |
| C | -2.3820997 | 6.2444931  | -2.9902151 | C  | 3.5523481  | 2.1191354  | 2.0295655  |
| C | -1.6861371 | 6.4207573  | -1.7648866 | C  | 0.9013067  | -0.8966287 | 4.8657939  |
| H | -3.2013788 | 4.8137514  | -4.3942090 | C  | 2.3460280  | 0.9335163  | 3.8261283  |
| H | -2.6705946 | 7.1217075  | -3.5889945 | H  | 1.2135223  | 2.4249203  | 5.9210802  |
| H | -0.7794542 | 5.4768786  | -0.0510029 | H  | 1.9896718  | 0.9786630  | 6.6216420  |
| H | -1.4253128 | 7.4347457  | -1.4256212 | C  | 3.6556436  | 3.1950584  | 0.9481998  |
| C | -3.4992379 | 4.8777387  | 2.5426495  | C  | 2.3502619  | 1.8782877  | 2.7562233  |
| C | -2.8631679 | 5.1659965  | 3.7791462  | C  | 1.0983774  | 0.6129409  | 4.6521347  |
| H | -3.3424531 | 3.9412348  | 0.6068778  | H  | 3.5769220  | 1.8172887  | -0.7649662 |
| H | -4.5317239 | 5.2163756  | 2.3672048  | H  | 1.1111092  | -1.4701719 | 3.9393662  |
| H | -3.3986210 | 5.7383531  | 4.5518057  | H  | 5.2363864  | 2.2763611  | -0.2858294 |
| H | -1.0830836 | 4.8968127  | 4.9824091  | H  | 5.8477097  | -1.8334548 | 2.2193492  |
| C | -1.7005577 | -0.6740755 | -3.8909874 | H  | 1.6029708  | -1.3142053 | 5.6159360  |
| C | -2.5025098 | 0.0008222  | -2.9324383 | H  | 7.3737226  | 1.4069772  | 3.6572708  |
| C | -2.1357927 | -1.9268344 | -4.3655874 | H  | 2.6379770  | 3.5903970  | 0.7550727  |
| C | -3.7083749 | -0.5857496 | -2.4569742 | H  | 0.2126154  | 0.9738028  | 4.0903346  |
| C | -4.0957783 | -1.8382804 | -2.9676435 | Zn | 2.4432192  | -1.5859540 | -1.1241194 |
| C | -3.3309255 | -2.5222205 | -3.9291632 | Br | 4.6892988  | -1.6011988 | -0.7131313 |
| H | -1.5302118 | -2.4556055 | -5.1185474 | H  | 5.6341623  | 1.5857167  | 1.8018973  |
| C | -4.6323334 | 0.1569913  | -1.4890714 | H  | 1.4350414  | -5.2281456 | -2.3860867 |
| H | -5.0370533 | -2.2864813 | -2.6111158 |    |            |            |            |
| C | -5.0700122 | -0.6789409 | -0.2749379 |    |            |            |            |
| H | -5.5832147 | -1.6175056 | -0.5718060 |    |            |            |            |
| H | -5.7819416 | -0.1006035 | 0.3483820  |    |            |            |            |
| H | -4.2115504 | -0.9357804 | 0.3782576  |    |            |            |            |
| C | -5.8477704 | 0.7143608  | -2.2560294 |    |            |            |            |
| H | -4.0729918 | 1.0273993  | -1.0896638 |    |            |            |            |
| H | -6.4606509 | -0.1058569 | -2.6853426 |    |            |            |            |
| H | -5.5295461 | 1.3668270  | -3.0941163 |    |            |            |            |
| H | -6.4991429 | 1.3109222  | -1.5844798 |    |            |            |            |
| C | -3.7842724 | -3.8628482 | -4.4948540 |    |            |            |            |
| C | -3.7629087 | -4.9674834 | -3.4247493 |    |            |            |            |
| H | -4.0585056 | -5.9462277 | -3.8564725 |    |            |            |            |
| H | -4.4666184 | -4.7391117 | -2.5968992 |    |            |            |            |
| H | -2.7547766 | -5.0759088 | -2.9786750 |    |            |            |            |
| C | -5.1630271 | -3.7620415 | -5.1707985 |    |            |            |            |
| H | -3.0474821 | -4.1445063 | -5.2794507 |    |            |            |            |
| H | -5.4442464 | -4.7270106 | -5.6408266 |    |            |            |            |
| H | -5.1707215 | -2.9801488 | -5.9563392 |    |            |            |            |
| H | -5.9556632 | -3.5073149 | -4.4367235 |    |            |            |            |
| C | -0.4365769 | -0.0317192 | -4.4587507 |    |            |            |            |
| C | 0.6998165  | -1.0325478 | -4.7153877 |    |            |            |            |
| H | 1.6334343  | -0.4912557 | -4.9682474 |    |            |            |            |
| H | 0.4764920  | -1.7132298 | -5.5634956 |    |            |            |            |

## 7.2.3 Pathways starting from 14j-ma

### 7.2.3.1 to 15r-ma and 15r-2-ma

#### TS1-8-r; COSMO

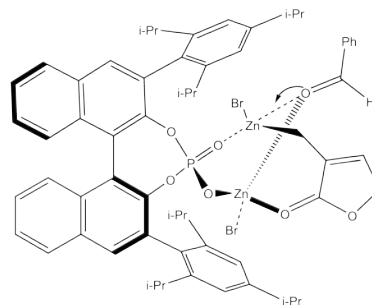

Energy(Hartree)= -11970.03920164

|   |            |            |           |
|---|------------|------------|-----------|
| C | -1.0997111 | -3.0105018 | 0.0338904 |
| C | -0.0171732 | -3.8083761 | 0.4182684 |

|   |            |            |            |    |            |            |            |
|---|------------|------------|------------|----|------------|------------|------------|
| C | -0.3042022 | -5.0052855 | 1.1793675  | H  | 4.6570225  | 4.3466128  | 0.9039141  |
| C | 0.7102933  | -5.8017789 | 1.7921195  | H  | 4.3350696  | -0.0950798 | 4.7555582  |
| C | -1.6801130 | -5.4027837 | 1.3645949  | H  | 6.1586260  | -0.5942906 | -2.9488767 |
| C | -1.9723029 | -6.6080742 | 2.0718069  | C  | 4.9529672  | 3.7018566  | 1.7625071  |
| C | -2.7278374 | -4.5582229 | 0.8983586  | H  | 1.2338517  | -0.7381606 | 4.6502025  |
| H | -3.7710021 | -4.8598624 | 1.0777568  | H  | 4.6434564  | 5.3697263  | 3.1383958  |
| C | -2.4681804 | -3.3347638 | 0.2935626  | H  | 4.0472845  | 0.6155833  | -3.7293292 |
| C | 3.2315350  | -1.7440900 | 0.3848977  | C  | 4.4552110  | 2.2972822  | 1.4346323  |
| C | 4.1382594  | -2.6998981 | -0.0615560 | C  | 3.9745452  | -1.0212209 | 4.2606873  |
| H | 5.2113542  | -2.4574095 | -0.0782441 | C  | 4.3420776  | 4.3080081  | 3.0314748  |
| C | 3.7173923  | -3.9685589 | -0.5515958 | H  | 4.6840558  | 3.7772081  | 3.9442643  |
| C | 4.6518983  | -4.8882660 | -1.1166759 | C  | 3.8628995  | 1.4527433  | 2.3857034  |
| C | 2.3192222  | -4.3220796 | -0.5053388 | C  | 5.9901527  | -0.2097051 | -1.9216309 |
| C | 1.9164243  | -5.5606006 | -1.0895064 | H  | 6.9523714  | 3.3343088  | 0.9092194  |
| C | 1.3850717  | -3.4057710 | 0.1051816  | C  | 4.6284342  | 1.7892803  | 0.1348873  |
| C | 1.8548351  | -2.1283962 | 0.4412759  | C  | 6.4932830  | 3.7212187  | 1.8408908  |
| O | -0.8566316 | -1.8443472 | -0.6852491 | H  | 6.8710905  | 4.7513509  | 2.0085864  |
| O | 0.9794320  | -1.1902637 | 0.9618258  | H  | 5.0771621  | 2.4441902  | -0.6299374 |
| P | -0.2356647 | -0.5306819 | 0.0805477  | C  | 1.6449723  | -0.0751746 | 3.8614119  |
| O | -1.1956075 | -0.0024626 | 1.1551202  | H  | 3.5784671  | -1.6919411 | 5.0512118  |
| O | 0.2570607  | 0.3870832  | -1.0415228 | H  | 4.8513107  | -1.5168949 | 3.7962439  |
| C | -0.9580731 | -7.3786013 | 2.6198391  | C  | 3.4570161  | 0.1385106  | 2.0792277  |
| C | 0.3921774  | -6.9569405 | 2.4938046  | C  | 3.9174188  | 1.0153973  | -2.7036952 |
| H | -3.0268133 | -6.9028504 | 2.1911261  | C  | 4.2439214  | 0.4876435  | -0.2296273 |
| H | -1.1973776 | -8.3019651 | 3.1690573  | H  | 6.4173184  | -0.9420181 | -1.2069800 |
| H | 1.7597208  | -5.4872835 | 1.7156472  | H  | 6.5691058  | 0.7317796  | -1.8131658 |
| H | 1.1953963  | -7.5468430 | 2.9612750  | C  | 2.8866054  | -0.7144411 | 3.2128189  |
| C | 2.8470223  | -6.4234399 | -1.6523370 | C  | 3.6518377  | -0.3566394 | 0.7591069  |
| C | 4.2294061  | -6.0953155 | -1.6531278 | C  | 4.4897655  | 0.0352087  | -1.6698140 |
| H | 0.8494277  | -5.8236111 | -1.1026395 | H  | 0.8450385  | 0.0944731  | 3.1164796  |
| H | 2.5089563  | -7.3671501 | -2.1070493 | H  | 2.8307856  | 1.1589713  | -2.5532466 |
| H | 4.9589208  | -6.7913778 | -2.0944746 | H  | 1.8786543  | 0.8990110  | 4.3388944  |
| H | 5.7173008  | -4.6093558 | -1.1349356 | H  | 3.2340794  | 4.2683222  | 3.0211289  |
| C | -4.1680257 | -1.6594474 | 1.0967629  | H  | 4.4202412  | 2.0039546  | -2.6627867 |
| C | -3.5347126 | -2.3246541 | 0.0076679  | H  | 6.8476125  | 3.0848835  | 2.6787884  |
| C | -5.1081900 | -0.6515987 | 0.8117773  | H  | 2.5722861  | -1.6882276 | 2.7883940  |
| C | -3.8688940 | -1.9770187 | -1.3300387 | H  | 3.9593193  | -0.9256633 | -1.8207956 |
| C | -4.8096181 | -0.9558607 | -1.5568730 | H  | 3.7148606  | 1.8158548  | 3.4134555  |
| C | -5.4409539 | -0.2752869 | -0.4995036 | Zn | -1.3970968 | 1.7964286  | 1.8734372  |
| H | -5.6034578 | -0.1314798 | 1.6478438  | Br | -1.8257889 | 2.6331528  | 3.9828409  |
| C | -3.2850332 | -2.7324903 | -2.5230320 | C  | 2.9517124  | 5.9937727  | -1.8950128 |
| H | -5.0661970 | -0.6934690 | -2.5959245 | C  | 0.8948940  | 3.6837761  | 1.3032390  |
| C | -2.5530709 | -1.8107470 | -3.5093728 | C  | 2.4852459  | 4.2727218  | -2.0517713 |
| H | -3.2249713 | -1.0459669 | -3.9507538 | C  | 2.1326861  | 5.6414877  | 0.3907497  |
| H | -2.1025938 | -2.3856449 | -4.3433821 | C  | 1.6610624  | 4.3176979  | 0.2346763  |
| H | -1.7204405 | -1.2893446 | -2.9959073 | C  | 2.7827598  | 6.2762889  | -0.6754778 |
| C | -4.3763482 | -3.5590545 | -3.2300384 | C  | 1.8496686  | 3.6278579  | -0.9879084 |
| H | -2.5372548 | -3.4527366 | -2.1323883 | O  | 0.4105029  | 2.5487261  | 1.1781195  |
| H | -5.1622505 | -2.9044162 | -3.6614819 | H  | 3.4536044  | 6.0972968  | -2.7357206 |
| H | -4.8708707 | -4.2561549 | -2.5234153 | H  | 1.9798371  | 6.1657938  | 1.3472380  |
| H | -3.9425516 | -4.1568312 | -4.0582383 | H  | 2.6199318  | 3.7475047  | -3.0087355 |
| C | -6.4439304 | 0.8452269  | -0.7480670 | H  | 3.1546606  | 7.3054867  | -0.5626123 |
| C | -5.7400739 | 2.1250011  | -1.2364645 | H  | 1.4801529  | 2.5931643  | -1.0678455 |
| H | -6.4602863 | 2.9651211  | -1.3231865 | Br | 0.8112741  | 0.1545415  | -4.5790577 |
| H | -5.2807415 | 1.9695797  | -2.2350077 | Zn | -0.5635543 | 0.8575300  | -2.8261134 |
| H | -4.9307947 | 2.4248793  | -0.5413450 | H  | -0.2572683 | 5.7423823  | -1.2965216 |
| C | -7.5726914 | 0.4271928  | -1.7051327 | C  | -1.5560852 | 4.4893150  | -2.5402111 |
| H | -6.9075544 | 1.0776860  | 0.2359744  | C  | -1.3100714 | 5.3896605  | -1.3770573 |
| H | -8.3256982 | 1.2365526  | -1.8010380 | C  | -1.9549494 | 3.2551670  | -2.0996804 |
| H | -8.0910583 | -0.4850904 | -1.3466360 | C  | -2.2341159 | 1.9808952  | -2.7689988 |
| H | -7.1849394 | 0.2165161  | -2.7238481 | C  | -1.9834373 | 3.3597907  | -0.6263402 |
| C | -3.8982196 | -2.0249574 | 2.5572869  | O  | -1.5966233 | 4.5837091  | -0.2129825 |
| C | -3.6049851 | -0.8096438 | 3.4493278  | O  | -2.3152313 | 2.4785029  | 0.1799905  |
| H | -3.3839686 | -1.1355276 | 4.4863533  | H  | -1.9709029 | 6.2836986  | -1.3392709 |
| H | -4.4582827 | -0.1030085 | 3.5037148  | H  | -1.4065586 | 4.8017408  | -3.5825163 |
| H | -2.7239916 | -0.2511993 | 3.0846949  | H  | 0.7107330  | 4.2732241  | 2.2383104  |
| C | -5.0681754 | -2.8525057 | 3.1260940  | H  | -2.5672964 | 2.1129531  | -3.8160847 |
| H | -2.9930894 | -2.6638631 | 2.5833170  | H  | -2.9745280 | 1.3836925  | -2.2003299 |
| H | -4.8543131 | -3.1741546 | 4.1665526  |    |            |            |            |
| H | -5.2639060 | -3.7598027 | 2.5194904  |    |            |            |            |
| H | -6.0046575 | -2.2560130 | 3.1410664  |    |            |            |            |

TS1-8-r

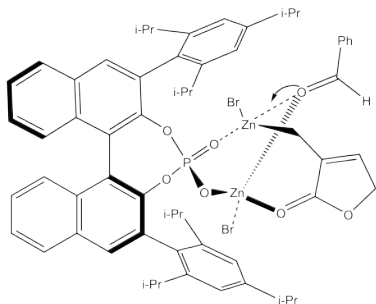

Energy(Hartree)= -11970.02555148  
 number of imaginary frequencies: 1

|   |            |            |            |
|---|------------|------------|------------|
| C | -1.1020862 | -3.0041696 | 0.0333202  |
| C | -0.0192904 | -3.8036455 | 0.4137728  |
| C | -0.3049028 | -5.0010908 | 1.1743470  |
| C | 0.7109644  | -5.8003244 | 1.7806507  |
| C | -1.6803455 | -5.3964878 | 1.3658078  |
| C | -1.9704624 | -6.6018154 | 2.0727762  |
| C | -2.7282281 | -4.5497832 | 0.9048403  |
| H | -3.7714614 | -4.8485853 | 1.0883800  |
| C | -2.4698914 | -3.3270084 | 0.2987106  |
| C | 3.2264557  | -1.7362435 | 0.3759026  |
| C | 4.1326880  | -2.6898840 | -0.0754470 |
| H | 5.2049778  | -2.4444696 | -0.0951776 |
| C | 3.7129251  | -3.9583413 | -0.5659393 |
| C | 4.6464224  | -4.8760731 | -1.1346123 |
| C | 2.3156516  | -4.3138708 | -0.5161795 |
| C | 1.9131643  | -5.5521323 | -1.1003203 |
| C | 1.3821597  | -3.4002188 | 0.0986286  |
| C | 1.8507866  | -2.1231706 | 0.4370942  |
| O | -0.8606897 | -1.8370769 | -0.6845073 |
| O | 0.9757065  | -1.1891841 | 0.9647628  |
| P | -0.2403485 | -0.5259224 | 0.0865742  |
| O | -1.2020781 | -0.0070471 | 1.1644390  |
| O | 0.2505507  | 0.4002640  | -1.0285979 |
| C | -0.9554165 | -7.3750270 | 2.6140432  |
| C | 0.3943442  | -6.9558927 | 2.4814227  |
| H | -3.0249487 | -6.8944552 | 2.1973501  |
| H | -1.1937936 | -8.2987002 | 3.1630334  |
| H | 1.7602156  | -5.4871074 | 1.6983763  |
| H | 1.1990344  | -7.5481288 | 2.9432361  |
| C | 2.8432492  | -6.4129588 | -1.6658445 |
| C | 4.2245641  | -6.0829172 | -1.6705196 |
| H | 0.8463862  | -5.8156392 | -1.1098551 |
| H | 2.5051737  | -7.3567395 | -2.1202315 |
| H | 4.9538890  | -6.7772161 | -2.1147882 |
| H | 5.7111752  | -4.5950221 | -1.1563111 |
| C | -4.1646317 | -1.6443707 | 1.0999689  |
| C | -3.5360728 | -2.3167435 | 0.0127855  |
| C | -5.1015349 | -0.6348692 | 0.8115516  |
| C | -3.8736035 | -1.9769805 | -1.3258360 |
| C | -4.8106527 | -0.9534841 | -1.5556216 |
| C | -5.4357927 | -0.2641968 | -0.5005814 |
| H | -5.5929691 | -0.1087640 | 1.6460202  |
| C | -3.2997490 | -2.7462736 | -2.5149864 |
| H | -5.0701759 | -0.6971544 | -2.5954480 |
| C | -2.5706904 | -1.8398083 | -3.5170255 |
| H | -3.2416608 | -1.0769197 | -3.9631314 |
| H | -2.1284652 | -2.4252901 | -4.3478784 |
| H | -1.7310741 | -1.3162293 | -3.0178712 |
| C | -4.3994732 | -3.5770190 | -3.2036996 |
| H | -2.5519772 | -3.4647791 | -2.1211034 |
| H | -5.1869212 | -2.9250362 | -3.6361716 |
| H | -4.8915171 | -4.2634677 | -2.4852984 |
| H | -3.9752176 | -4.1860125 | -4.0286191 |
| C | -6.4347930 | 0.8590449  | -0.7528055 |

|    |            |            |            |
|----|------------|------------|------------|
| C  | -5.7274020 | 2.1336872  | -1.2490282 |
| H  | -6.4442536 | 2.9762582  | -1.3397788 |
| H  | -5.2688623 | 1.9719187  | -2.2468479 |
| H  | -4.9169378 | 2.4340427  | -0.5556338 |
| C  | -7.5682070 | 0.4401483  | -1.7036899 |
| H  | -6.8950390 | 1.0984265  | 0.2312682  |
| H  | -8.3189334 | 1.2512096  | -1.8026012 |
| H  | -8.0880808 | -0.4684981 | -1.3389241 |
| H  | -7.1851131 | 0.2219950  | -2.7224981 |
| C  | -3.8958836 | -2.0069657 | 2.5614814  |
| C  | -3.6072154 | -0.7920386 | 3.4554923  |
| H  | -3.3881905 | -1.1175810 | 4.4928031  |
| H  | -4.4608482 | -0.0859778 | 3.5097787  |
| H  | -2.7254985 | -0.2314909 | 3.0962912  |
| C  | -5.0663978 | -2.8354271 | 3.1278786  |
| H  | -2.9899127 | -2.6447242 | 2.5894683  |
| H  | -4.8554074 | -3.1567394 | 4.1689332  |
| H  | -5.2610234 | -3.7426467 | 2.5210203  |
| H  | -6.0035753 | -2.2402476 | 3.1399609  |
| H  | 4.6578832  | 4.3527984  | 0.9100063  |
| H  | 4.3449502  | -0.0999894 | 4.7466759  |
| H  | 6.1436250  | -0.5861694 | -2.9578613 |
| C  | 4.9521782  | 3.7044525  | 1.7666953  |
| H  | 1.2423398  | -0.7474140 | 4.6507328  |
| H  | 4.6444742  | 5.3692654  | 3.1484320  |
| H  | 4.0397832  | 0.6387490  | -3.7354135 |
| C  | 4.4519647  | 2.3015538  | 1.4350491  |
| C  | 3.9832747  | -1.0245324 | 4.2498527  |
| C  | 4.3419142  | 4.3082583  | 3.0371576  |
| H  | 4.6831759  | 3.7749773  | 3.9486138  |
| C  | 3.8617193  | 1.4542896  | 2.3843845  |
| C  | 5.9771512  | -0.2041734 | -1.9294674 |
| H  | 6.9510061  | 3.3339529  | 0.9147931  |
| C  | 4.6219605  | 1.7979797  | 0.1334399  |
| C  | 6.4922562  | 3.7207715  | 1.8464301  |
| H  | 6.8736093  | 4.7491482  | 2.0170813  |
| H  | 5.0699102  | 2.4549296  | -0.6301436 |
| C  | 1.6501058  | -0.0812968 | 3.8631120  |
| H  | 3.5918712  | -1.6981878 | 5.0400618  |
| H  | 4.8590271  | -1.5167418 | 3.7803002  |
| C  | 3.4556879  | 0.1409792  | 2.0748596  |
| C  | 3.9160119  | 1.0379429  | -2.7091462 |
| C  | 4.2356785  | 0.4981614  | -0.2350713 |
| H  | 6.4003870  | -0.9408916 | -1.2172536 |
| H  | 6.5627452  | 0.7326629  | -1.8171469 |
| C  | 2.8903688  | -0.7160358 | 3.2078423  |
| C  | 3.6465356  | -0.3493980 | 0.7525574  |
| C  | 4.4783752  | 0.0500371  | -1.6772237 |
| H  | 0.8466541  | 0.0894196  | 3.1224531  |
| H  | 2.8303390  | 1.1907062  | -2.5608251 |
| H  | 1.8817596  | 0.8914732  | 4.3443103  |
| H  | 3.2338982  | 4.2686961  | 3.0274997  |
| H  | 4.4303633  | 2.0207764  | -2.6666360 |
| H  | 6.8445249  | 3.0807665  | 2.6820965  |
| H  | 2.5762240  | -1.6888831 | 2.7813110  |
| H  | 3.9399221  | -0.9055491 | -1.8333036 |
| H  | 3.7161738  | 1.8130967  | 3.4139749  |
| Zn | -1.4118825 | 1.7858574  | 1.8903641  |
| Br | -1.7935650 | 2.6764373  | 3.9760404  |
| C  | 2.9610676  | 5.6195596  | -1.8386903 |
| C  | 0.8781035  | 3.6725380  | 1.3236559  |
| C  | 2.5154166  | 4.2930598  | -2.0043040 |
| C  | 2.1056181  | 5.6514388  | 0.4335199  |
| C  | 1.6546934  | 4.3224977  | 0.2685283  |
| C  | 2.7635480  | 6.2974504  | -0.6210508 |
| C  | 1.8718832  | 3.6374544  | -0.9511461 |
| O  | 0.4142642  | 2.5334541  | 1.1847899  |
| H  | 3.4700718  | 6.1313510  | -2.6702074 |
| H  | 1.9319370  | 6.1707724  | 1.3893153  |
| H  | 2.6722990  | 3.7682540  | -2.9580891 |
| H  | 3.1203984  | 7.3311787  | -0.5003539 |

|    |            |           |            |
|----|------------|-----------|------------|
| H  | 1.5165372  | 2.5982537 | -1.0392225 |
| Br | 0.8407392  | 0.1090578 | -4.5684844 |
| Zn | -0.5443020 | 0.8131388 | -2.8446116 |
| H  | -0.2293809 | 5.6896151 | -1.3557213 |
| C  | -1.5425584 | 4.4310986 | -2.5816416 |
| C  | -1.2850663 | 5.3424353 | -1.4281636 |
| C  | -1.9443798 | 3.2026291 | -2.1265323 |
| C  | -2.2295203 | 1.9232991 | -2.7768109 |
| C  | -1.9665023 | 3.3237436 | -0.6521302 |
| O  | -1.5703583 | 4.5527165 | -0.2550882 |
| O  | -2.2996747 | 2.4562024 | 0.1644684  |
| H  | -1.9407793 | 6.2413662 | -1.3955070 |
| H  | -1.3976045 | 4.7294921 | -3.6285727 |
| H  | 0.6644076  | 4.2545079 | 2.2584692  |
| H  | -2.5729267 | 2.0391582 | -3.8222988 |
| H  | -2.9560801 | 1.3260346 | -2.1910430 |

## TS2-8-r; COSMO

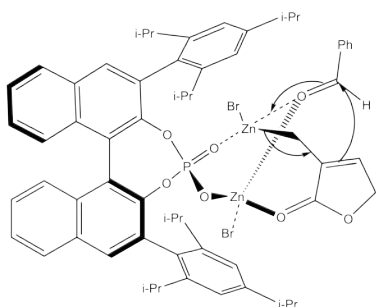

Energy(Hartree)= -11970.02474498

|   |            |            |            |
|---|------------|------------|------------|
| C | 1.3438365  | 2.3239995  | 1.4863826  |
| C | 2.7452301  | 2.3329316  | 1.4687672  |
| C | 3.4028245  | 3.6199287  | 1.4781946  |
| C | 4.8075284  | 3.7731654  | 1.2735929  |
| C | 2.6090009  | 4.8120203  | 1.6632405  |
| C | 3.2578927  | 6.0827747  | 1.7161613  |
| C | 1.1899438  | 4.7123740  | 1.7306541  |
| H | 0.5982017  | 5.6332313  | 1.8466500  |
| C | 0.5330267  | 3.4960752  | 1.5850422  |
| C | 3.8185735  | -1.1738989 | 0.2895209  |
| C | 4.9439999  | -1.3978177 | 1.0722243  |
| H | 5.5160408  | -2.3298949 | 0.9480753  |
| C | 5.3348357  | -0.4865936 | 2.0976510  |
| C | 6.4278363  | -0.7883312 | 2.9652022  |
| C | 4.5741614  | 0.7222029  | 2.3184632  |
| C | 4.8963875  | 1.5234780  | 3.4543981  |
| C | 3.5072465  | 1.0520442  | 1.4007335  |
| C | 3.1687064  | 0.0931136  | 0.4431392  |
| O | 0.6598355  | 1.1082341  | 1.4470233  |
| O | 2.1401022  | 0.3769428  | -0.4538702 |
| P | 0.5934145  | 0.2671605  | 0.0468375  |
| O | -0.2294100 | 0.9780472  | -1.0427280 |
| O | 0.1553326  | -1.1480663 | 0.4250635  |
| C | 4.6303337  | 6.1909275  | 1.5508791  |
| C | 5.4055497  | 5.0255402  | 1.3086305  |
| H | 2.6398260  | 6.9810717  | 1.8715304  |
| H | 5.1171368  | 7.1774295  | 1.5862689  |
| H | 5.4203323  | 2.8836834  | 1.0739530  |
| H | 6.4896819  | 5.1150367  | 1.1405769  |
| C | 5.9505853  | 1.1880950  | 4.2939232  |
| C | 6.7377248  | 0.0339172  | 4.0385131  |
| H | 4.2921794  | 2.4155983  | 3.6690147  |
| H | 6.1734754  | 1.8203991  | 5.1668799  |
| H | 7.5777787  | -0.2167976 | 4.7040300  |
| H | 7.0082144  | -1.7052463 | 2.7770841  |
| C | -1.5806527 | 3.9108631  | 0.2721190  |
| C | -0.9542748 | 3.3933677  | 1.4453597  |
| C | -2.9732113 | 3.7800160  | 0.1411940  |
| C | -1.7377290 | 2.7458860  | 2.4391202  |
| C | -3.1311514 | 2.6453722  | 2.2548280  |
| C | -3.7723597 | 3.1524947  | 1.1125466  |
| H | -3.4583798 | 4.1619594  | -0.7714165 |
| C | -1.1273174 | 2.1833664  | 3.7222051  |
| H | -3.7275605 | 2.1471116  | 3.0336117  |
| C | -1.4254410 | 0.6834072  | 3.9028091  |
| H | -2.5125165 | 0.4917208  | 4.0217639  |
| H | -0.9211799 | 0.2934219  | 4.8106991  |
| H | -1.0619261 | 0.0947783  | 3.0379084  |
| C | -1.5790666 | 2.9996433  | 4.9480937  |
| H | -0.0263308 | 2.2930535  | 3.6514608  |
| H | -2.6771732 | 2.9315102  | 5.0968866  |
| H | -1.3218374 | 4.0722242  | 4.8329080  |
| H | -1.0906053 | 2.6253690  | 5.8716064  |
| C | -5.2815861 | 3.0746254  | 0.9012658  |
| C | -5.9749110 | 1.9588054  | 1.6939533  |
| H | -7.0426688 | 1.8853412  | 1.4038274  |
| H | -5.9483268 | 2.1556068  | 2.7860982  |
| H | -5.5011969 | 0.9719874  | 1.5183934  |
| C | -5.9338073 | 4.4408229  | 1.1957657  |
| H | -5.4348094 | 2.8642757  | -0.1824151 |
| H | -7.0217079 | 4.4190395  | 0.9772175  |
| H | -5.4764406 | 5.2477433  | 0.5889603  |
| H | -5.8034318 | 4.7095659  | 2.2650911  |
| C | -0.8039513 | 4.6116633  | -0.8446330 |
| C | -1.0818459 | 4.0237963  | -2.2393165 |
| H | -0.4873159 | 4.5624757  | -3.0054975 |
| H | -2.1493885 | 4.1067935  | -2.5284726 |
| H | -0.7999623 | 2.9558374  | -2.2799575 |
| C | -1.0782550 | 6.1282117  | -0.8219119 |
| H | 0.2769828  | 4.4659757  | -0.6482858 |
| H | -0.4719291 | 6.6501449  | -1.5909825 |
| H | -0.8387132 | 6.5740958  | 0.1649254  |
| H | -2.1475043 | 6.3422152  | -1.0312343 |
| H | -0.4878821 | -4.8742088 | -2.1042253 |
| H | 4.4662233  | -2.1727003 | -4.2884392 |
| H | 2.7369314  | -5.3078022 | 2.9497972  |
| C | 0.3633884  | -4.7156469 | -2.8013956 |
| H | 3.3596975  | 0.8449664  | -4.0193511 |
| H | -1.0353956 | -4.6989101 | -4.4740946 |
| H | 2.1988747  | -2.9315083 | 3.5668439  |
| C | 1.3542980  | -3.8334644 | -2.0520201 |
| C | 4.8528244  | -1.4804388 | -3.5112072 |
| C | -0.2037902 | -4.0820696 | -4.0770031 |
| H | 0.5639207  | -4.0098845 | -4.8759123 |
| C | 2.0577522  | -2.7895885 | -2.6698494 |
| C | 2.4038717  | -5.0936562 | 1.9139176  |
| H | 1.3366303  | -6.5897511 | -2.1683821 |
| C | 1.6060049  | -4.0810461 | -0.6879470 |
| C | 0.9695054  | -6.1020599 | -3.0938722 |
| H | 0.2160411  | -6.7711661 | -3.5596074 |
| H | 1.0605697  | -4.9023189 | -0.1995457 |
| C | 2.7867276  | -0.0004095 | -3.5862212 |
| H | 5.4410529  | -0.6901469 | -4.0226561 |
| H | 5.5411839  | -2.0568453 | -2.8602332 |
| C | 2.9419841  | -1.9630500 | -1.9508656 |
| C | 1.9406322  | -2.6931377 | 2.5142085  |
| C | 2.4912132  | -3.3024483 | 0.0764481  |
| H | 2.9192810  | -5.8027059 | 1.2345162  |
| H | 1.3152087  | -5.3048655 | 1.8739349  |
| C | 3.6970994  | -0.8650476 | -2.6973849 |
| C | 3.1368882  | -2.1969543 | -0.5635724 |
| C | 2.7103427  | -3.6294278 | 1.5606616  |
| H | 1.9395200  | 0.4200492  | -3.0107036 |
| H | 2.1754976  | -1.6259759 | 2.3416187  |
| H | 2.3613602  | -0.5757972 | -4.4340807 |
| H | -0.5932758 | -3.0610177 | -3.8934614 |
| H | 0.8481032  | -2.8191370 | 2.3856893  |

|    |            |            |            |
|----|------------|------------|------------|
| H  | 1.8286663  | -6.0139371 | -3.7918803 |
| H  | 4.1573820  | -0.1961828 | -1.9411019 |
| H  | 3.7908724  | -3.4771023 | 1.7610748  |
| H  | 1.9029627  | -2.5911876 | -3.7400148 |
| Zn | -1.3955816 | 0.1454532  | -2.3366328 |
| Br | -1.3108366 | 0.0701643  | -4.6416835 |
| C  | -4.0862478 | -6.3385159 | -3.1909138 |
| C  | -3.0868582 | -2.2463874 | -2.3485032 |
| C  | -3.3499707 | -6.0374511 | -2.0312843 |
| C  | -4.1704360 | -3.9733681 | -3.7449214 |
| C  | -3.4216104 | -3.6639311 | -2.5832852 |
| C  | -4.4968323 | -5.3017353 | -4.0471133 |
| C  | -3.0188987 | -4.7114881 | -1.7267017 |
| O  | -1.9802916 | -1.8593191 | -1.7404821 |
| H  | -4.3400509 | -7.3829444 | -3.4283647 |
| H  | -4.4638758 | -3.1656524 | -4.4346697 |
| H  | -3.0271155 | -6.8431750 | -1.3545565 |
| H  | -5.0646262 | -5.5308889 | -4.9616081 |
| H  | -2.4566973 | -4.4910260 | -0.8074810 |
| Br | -1.7973971 | -3.9510097 | 1.6482099  |
| Zn | -1.5690685 | -2.0658017 | 0.2698699  |
| H  | -5.8330727 | -1.5831210 | -3.0405068 |
| C  | -4.8073025 | -1.7044624 | -1.0780538 |
| C  | -5.7294975 | -1.0535413 | -2.0709565 |
| C  | -4.0682220 | -0.6706292 | -0.4631969 |
| C  | -3.2337951 | -0.6345421 | 0.6572149  |
| C  | -4.0564383 | 0.3852221  | -1.5197724 |
| O  | -5.1029263 | 0.2288495  | -2.3495523 |
| O  | -3.1727629 | 1.2203195  | -1.7387749 |
| H  | -6.7478745 | -0.8741733 | -1.6631612 |
| H  | -5.0666372 | -2.6568122 | -0.5929402 |
| H  | -3.4082190 | -1.5781456 | -3.1771564 |
| H  | -3.5080850 | -1.2666041 | 1.5198105  |
| H  | -2.7406807 | 0.3263155  | 0.8863949  |

|   |            |            |            |
|---|------------|------------|------------|
| O | 0.6632369  | 1.1133847  | 1.4459287  |
| O | 2.1436685  | 0.3849258  | -0.4549377 |
| P | 0.5976374  | 0.2720420  | 0.0452045  |
| O | -0.2277130 | 0.9830100  | -1.0420627 |
| O | 0.1637656  | -1.1437749 | 0.4238308  |
| C | 4.6293267  | 6.1988232  | 1.5485880  |
| C | 5.4051612  | 5.0343986  | 1.3071082  |
| H | 2.6384346  | 6.9871979  | 1.8676311  |
| H | 5.1150821  | 7.1857906  | 1.5838015  |
| H | 5.4208761  | 2.8922603  | 1.0729772  |
| H | 6.4892565  | 5.1244670  | 1.1394983  |
| C | 5.9605581  | 1.1990047  | 4.2859833  |
| C | 6.7461672  | 0.0444485  | 4.0310555  |
| H | 4.3009554  | 2.4257093  | 3.6622743  |
| H | 6.1857735  | 1.8330132  | 5.1570331  |
| H | 7.5876884  | -0.2056934 | 4.6948317  |
| H | 7.0122244  | -1.6969875 | 2.7729383  |
| C | -1.5796042 | 3.9121465  | 0.2706118  |
| C | -0.9521993 | 3.3961024  | 1.4435718  |
| C | -2.9716169 | 3.7777087  | 0.1401004  |
| C | -1.7338447 | 2.7471126  | 2.4375577  |
| C | -3.1265805 | 2.6422759  | 2.2529549  |
| C | -3.7687782 | 3.1480588  | 1.1110094  |
| H | -3.4575030 | 4.1574501  | -0.7730365 |
| C | -1.1217929 | 2.1897950  | 3.7221244  |
| H | -3.7216654 | 2.1431647  | 3.0322543  |
| C | -1.4153114 | 0.6898713  | 3.9084441  |
| H | -2.5017401 | 0.4947921  | 4.0281061  |
| H | -0.9107522 | 0.3041690  | 4.8178419  |
| H | -1.0491604 | 0.0985885  | 3.0466775  |
| C | -1.5745844 | 3.0101612  | 4.9447355  |
| H | -0.0211354 | 2.3019221  | 3.6501620  |
| H | -2.6724318 | 2.9412363  | 5.0944273  |
| H | -1.3202550 | 4.0827125  | 4.8248169  |
| H | -1.0856028 | 2.6412060  | 5.8700536  |
| C | -5.2780753 | 3.0693513  | 0.9009293  |
| C | -5.9669134 | 1.9399886  | 1.6783870  |
| H | -7.0351143 | 1.8663188  | 1.3895442  |
| H | -5.9408159 | 2.1215576  | 2.7731169  |
| H | -5.4889993 | 0.9575814  | 1.4899097  |
| C | -5.9330740 | 4.4291982  | 1.2167056  |
| H | -5.4324106 | 2.8734727  | -0.1853284 |
| H | -7.0215440 | 4.4096746  | 1.0005856  |
| H | -5.4778128 | 5.2458375  | 0.6217762  |
| H | -5.8001628 | 4.6830951  | 2.2891437  |
| C | -0.8052303 | 4.6147729  | -0.8465789 |
| C | -1.0801024 | 4.0248500  | -2.2408761 |
| H | -0.4886231 | 4.5653356  | -3.0079190 |
| H | -2.1476728 | 4.1008009  | -2.5314848 |
| H | -0.7917987 | 2.9588092  | -2.2818519 |
| C | -1.0856302 | 6.1301206  | -0.8247063 |
| H | 0.2761883  | 4.4736122  | -0.6496056 |
| H | -0.4815497 | 6.6546340  | -1.5936659 |
| H | -0.8490589 | 6.5778131  | 0.1619528  |
| H | -2.1554733 | 6.3405385  | -1.0339907 |
| H | -0.5110137 | -4.8493326 | -2.0836858 |
| H | 4.4487301  | -2.1877772 | -4.2856463 |
| H | 2.7412513  | -5.2937283 | 2.9652405  |
| C | 0.3475626  | -4.7141450 | -2.7771540 |
| H | 3.3552162  | 0.8346492  | -4.0267780 |
| H | -1.0340083 | -4.7142112 | -4.4646302 |
| H | 2.1917871  | -2.9158695 | 3.5779221  |
| C | 1.3429100  | -3.8308960 | -2.0346955 |
| C | 4.8403984  | -1.4937040 | -3.5128044 |
| C | -0.2010331 | -4.0982451 | -4.0691708 |
| H | 0.5752547  | -4.0486384 | -4.8613879 |
| C | 2.0461272  | -2.7904889 | -2.6579995 |
| C | 2.4060146  | -5.0820408 | 1.9296203  |
| H | 1.2939525  | -6.5878849 | -2.1028408 |
| C | 1.5973937  | -4.0738685 | -0.6704839 |
| C | 0.9381579  | -6.1130938 | -3.0391761 |

### TS2-8-r

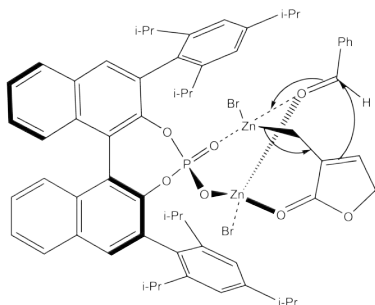

Energy(Hartree)= -11970.01305399  
number of imaginary frequencies: 1

|   |           |            |           |
|---|-----------|------------|-----------|
| C | 1.3466532 | 2.3290258  | 1.4848748 |
| C | 2.7481211 | 2.3396831  | 1.4670751 |
| C | 3.4039779 | 3.6274359  | 1.4761241 |
| C | 4.8083306 | 3.7819699  | 1.2717819 |
| C | 2.6092916 | 4.8187900  | 1.6606754 |
| C | 3.2574547 | 6.0893993  | 1.7132008 |
| C | 1.1906744 | 4.7172678  | 1.7279338 |
| H | 0.5966610 | 5.6368164  | 1.8427075 |
| C | 0.5348670 | 3.5005691  | 1.5829286 |
| C | 3.8180583 | -1.1687508 | 0.2905954 |
| C | 4.9443313 | -1.3915009 | 1.0721343 |
| H | 5.5139118 | -2.3251018 | 0.9478865 |
| C | 5.3386897 | -0.4791941 | 2.0948228 |
| C | 6.4329848 | -0.7792414 | 2.9605168 |
| C | 4.5793691 | 0.7303625  | 2.3150939 |
| C | 4.9045739 | 1.5330217  | 3.4488832 |
| C | 3.5113627 | 1.0595732  | 1.3985664 |
| C | 3.1712925 | 0.1001631  | 0.4419375 |

|    |            |            |            |   |            |            |            |
|----|------------|------------|------------|---|------------|------------|------------|
| H  | 0.1798877  | -6.7816237 | -3.4978490 | C | 3.2166227  | 6.1277637  | 1.9282315  |
| H  | 1.0511316  | -4.8913277 | -0.1768652 | C | 1.1894242  | 4.7011860  | 1.8186263  |
| C  | 2.7801013  | -0.0050774 | -3.5858505 | H | 0.5699133  | 5.6013712  | 1.9470697  |
| H  | 5.4303343  | -0.7084117 | -4.0298701 | C | 0.5726912  | 3.4734979  | 1.6073513  |
| H  | 5.5281513  | -2.0709944 | -2.8622906 | C | 3.9311707  | -1.0942945 | 0.2947535  |
| C  | 2.9340419  | -1.9635449 | -1.9445410 | C | 5.0239154  | -1.3475182 | 1.1145028  |
| C  | 1.9325126  | -2.6820879 | 2.5246913  | H | 5.5804330  | -2.2904588 | 1.0010817  |
| C  | 2.4865836  | -3.2950902 | 0.0885315  | C | 5.3971956  | -0.4552375 | 2.1625296  |
| H  | 2.9228140  | -5.7900169 | 1.2502941  | C | 6.4594962  | -0.7837982 | 3.0580033  |
| H  | 1.3180890  | -5.2968189 | 1.8929458  | C | 4.6413889  | 0.7571604  | 2.3806996  |
| C  | 3.6900289  | -0.8705414 | -2.6975053 | C | 4.9330198  | 1.5319834  | 3.5432752  |
| C  | 3.1327428  | -2.1934606 | -0.5572827 | C | 3.6088479  | 1.1143171  | 1.4351075  |
| C  | 2.7065372  | -3.6172526 | 1.5736081  | C | 3.3019654  | 0.1856523  | 0.4359206  |
| H  | 1.9395678  | 0.4253197  | -3.0082011 | O | 0.7879831  | 1.0923470  | 1.4102109  |
| H  | 2.1624925  | -1.6142820 | 2.3498033  | O | 2.3218468  | 0.5101908  | -0.5007945 |
| H  | 2.3456012  | -0.5807826 | -4.4287075 | P | 0.7540852  | 0.3744944  | -0.0672452 |
| H  | -0.5821757 | -3.0698598 | -3.9109098 | O | -0.0512959 | 1.1604133  | -1.1072664 |
| H  | 0.8404774  | -2.8149486 | 2.3987685  | O | 0.3364293  | -1.0784525 | 0.1970364  |
| H  | 1.8031987  | -6.0485624 | -3.7321647 | C | 4.5901605  | 6.2803338  | 1.8138154  |
| H  | 4.1556347  | -0.2010178 | -1.9449448 | C | 5.4074622  | 5.1472870  | 1.5561350  |
| H  | 3.7862082  | -3.4595447 | 1.7745329  | H | 2.5680571  | 7.0022409  | 2.0949174  |
| H  | 1.8886740  | -2.5952001 | -3.7282421 | H | 5.0462811  | 7.2781759  | 1.9017500  |
| Zn | -1.3847103 | 0.1617427  | -2.3482870 | H | 5.4919552  | 3.0155942  | 1.2450950  |
| Br | -1.3430358 | 0.0492496  | -4.6450621 | H | 6.4935794  | 5.2739793  | 1.4298389  |
| C  | -4.1101321 | -6.3141320 | -3.2658485 | C | 5.9576026  | 1.1713027  | 4.4085829  |
| C  | -3.0661042 | -2.2471043 | -2.3619139 | C | 6.7430829  | 0.0153840  | 4.1556951  |
| C  | -3.3946257 | -6.0367897 | -2.0878119 | H | 4.3294384  | 2.4245281  | 3.7572829  |
| C  | -4.1435667 | -3.9431824 | -3.7957498 | H | 6.1579670  | 1.7848238  | 5.3002339  |
| C  | -3.4154789 | -3.6576103 | -2.6150114 | H | 7.5598227  | -0.2553136 | 4.8421084  |
| C  | -4.4850391 | -5.2624362 | -4.1194160 | H | 7.0368718  | -1.7028832 | 2.8710162  |
| C  | -3.0480372 | -4.7203344 | -1.7611905 | C | -1.4943331 | 3.8311722  | 0.1991730  |
| O  | -1.9675701 | -1.8671992 | -1.7462467 | C | -0.9063961 | 3.3324550  | 1.4021991  |
| H  | -4.3753745 | -7.3517452 | -3.5200292 | C | -2.8769793 | 3.6635280  | 0.0062909  |
| H  | -4.4033711 | -3.1229214 | -4.4843998 | C | -1.7167291 | 2.6630760  | 2.3582122  |
| H  | -3.0995009 | -6.8536594 | -1.4118544 | C | -3.1018817 | 2.5450068  | 2.1237526  |
| H  | -5.0351415 | -5.4730495 | -5.0490441 | C | -3.7066151 | 3.0365067  | 0.9557014  |
| H  | -2.5046808 | -4.5187750 | -0.8258598 | H | -3.3333470 | 4.0286755  | -0.9275264 |
| Br | -1.7825450 | -4.0045609 | 1.5942391  | C | -1.1427328 | 2.0734369  | 3.6452961  |
| Zn | -1.5338567 | -2.1016980 | 0.2560926  | H | -3.7194109 | 2.0341809  | 2.8775097  |
| H  | -5.8248257 | -1.5886415 | -3.0155433 | C | -1.4010160 | 0.5581046  | 3.7465654  |
| C  | -4.7998061 | -1.7229359 | -1.0568271 | H | -2.4858678 | 0.3291092  | 3.8042683  |
| C  | -5.7231865 | -1.0632292 | -2.0424353 | H | -0.9273097 | 0.1416438  | 4.6592250  |
| C  | -4.0539207 | -0.6975735 | -0.4386703 | H | -0.9764739 | 0.0211196  | 2.8757974  |
| C  | -3.2086426 | -0.6723139 | 0.6734102  | C | -1.6709386 | 2.8215946  | 4.8834668  |
| C  | -4.0485540 | 0.3697863  | -1.4846891 | H | -0.0438111 | 2.2191438  | 3.6249770  |
| O  | -5.1032602 | 0.2205788  | -2.3106016 | H | -2.7710609 | 2.7124152  | 4.9850508  |
| O  | -3.1700589 | 1.2080346  | -1.6993838 | H | -1.4449453 | 3.9056200  | 4.8238131  |
| H  | -6.7440124 | -0.8898548 | -1.6352827 | H | -1.2074994 | 2.4234772  | 5.8097940  |
| H  | -5.0477500 | -2.6851443 | -0.5856123 | C | -5.2051193 | 2.9411104  | 0.6860648  |
| H  | -3.3930675 | -1.5625269 | -3.1755677 | C | -5.9166904 | 1.8235275  | 1.4597429  |
| H  | -3.4647632 | -1.3191777 | 1.5302503  | H | -6.9691094 | 1.7328927  | 1.1221309  |
| H  | -2.7128481 | 0.2858415  | 0.9072938  | H | -5.9413288 | 2.0299966  | 2.5503165  |
|    |            |            |            | H | -5.4263352 | 0.8403371  | 1.3123394  |
|    |            |            |            | C | -5.8802717 | 4.3025782  | 0.9483076  |
|    |            |            |            | H | -5.3090601 | 2.7202787  | -0.4000190 |
|    |            |            |            | H | -6.9585365 | 4.2675899  | 0.6882080  |
|    |            |            |            | H | -5.4092459 | 5.1102194  | 0.3529975  |
|    |            |            |            | H | -5.7938391 | 4.5799495  | 2.0199939  |
|    |            |            |            | C | -0.6831189 | 4.5568460  | -0.8756710 |
|    |            |            |            | C | -1.0115597 | 4.1012141  | -2.3071331 |
|    |            |            |            | H | -0.3422505 | 4.6115226  | -3.0295684 |
|    |            |            |            | H | -2.0524958 | 4.3484461  | -2.6009356 |
|    |            |            |            | H | -0.8658213 | 3.0123631  | -2.4322670 |
|    |            |            |            | C | -0.8655389 | 6.0829418  | -0.7466728 |
|    |            |            |            | H | 0.3868575  | 4.3252306  | -0.6998440 |
|    |            |            |            | H | -0.2343299 | 6.6179879  | -1.4860601 |
|    |            |            |            | H | -0.5965248 | 6.4518243  | 0.2629493  |
|    |            |            |            | H | -1.9226618 | 6.3674384  | -0.9326233 |
|    |            |            |            | H | -0.3780766 | -4.6613104 | -2.2980321 |
|    |            |            |            | H | 4.7578339  | -2.1123721 | -4.2394934 |
|    |            |            |            | H | 2.6831767  | -5.1946290 | 2.9279942  |

### TS2-8-r-transmetal; COSMO

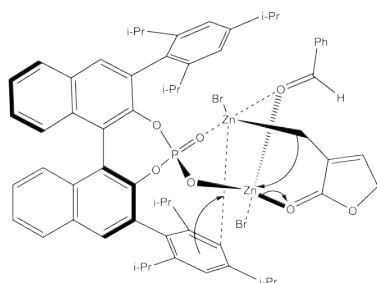

Energy(Hartree)= -11970.02093736

|   |           |           |           |
|---|-----------|-----------|-----------|
| C | 1.4224617 | 2.3286719 | 1.5093635 |
| C | 2.8230967 | 2.3795899 | 1.5289453 |
| C | 3.4423981 | 3.6814620 | 1.6049768 |
| C | 4.8480193 | 3.8808321 | 1.4543621 |
| C | 2.6070866 | 4.8423784 | 1.8064223 |



|    |            |            |            |
|----|------------|------------|------------|
| C  | 0.5458581  | -4.6077186 | -2.9185069 |
| H  | 3.6267681  | 0.9204643  | -4.0252379 |
| H  | -0.6780877 | -4.6166454 | -4.7275433 |
| H  | 2.0986138  | -2.8167412 | 3.5059905  |
| C  | 1.5233590  | -3.7370356 | -2.1335570 |
| C  | 5.1076801  | -1.4110863 | -3.4528479 |
| C  | 0.1561539  | -4.0334534 | -4.2865335 |
| H  | 1.0025839  | -4.0835423 | -5.0030789 |
| C  | 2.2687199  | -2.7087348 | -2.7265970 |
| C  | 2.3973839  | -4.9842928 | 1.8773671  |
| H  | 1.3127287  | -6.4967854 | -2.0767705 |
| C  | 1.7111736  | -3.9741224 | -0.7569722 |
| C  | 1.0776455  | -6.0473556 | -3.0622534 |
| H  | 0.3321072  | -6.6972058 | -3.5661144 |
| H  | 1.1336372  | -4.7823256 | -0.2834924 |
| C  | 3.0424165  | 0.0646313  | -3.6292561 |
| H  | 5.7146140  | -0.6234407 | -3.9462195 |
| H  | 5.7696544  | -1.9783187 | -2.7672368 |
| C  | 3.1278714  | -1.8836161 | -1.9754318 |
| C  | 1.8983627  | -2.5816442 | 2.4400554  |
| C  | 2.5748002  | -3.2018726 | 0.0379400  |
| H  | 2.9425324  | -5.6957593 | 1.2242374  |
| H  | 1.3117061  | -5.1978558 | 1.7900748  |
| C  | 3.9159174  | -0.7921389 | -2.6960957 |
| C  | 3.2624351  | -2.1085678 | -0.5807315 |
| C  | 2.7185866  | -3.5209896 | 1.5328779  |
| H  | 2.1548450  | 0.4661967  | -3.1026912 |
| H  | 2.1423308  | -1.5153487 | 2.2760694  |
| H  | 2.6804251  | -0.5143405 | -4.5042525 |
| H  | -0.1582831 | -2.9729175 | -4.2188338 |
| H  | 0.8135824  | -2.7062746 | 2.2530782  |
| H  | 2.0080196  | -6.0588709 | -3.6679504 |
| H  | 4.3404217  | -0.1174850 | -1.9246661 |
| H  | 3.7863473  | -3.3644459 | 1.7893436  |
| H  | 2.1682524  | -2.5159791 | -3.8037926 |
| Zn | -1.7114447 | 0.3262701  | -1.8720223 |
| Br | -1.5399561 | 0.4682948  | -4.1975184 |
| C  | -5.2135463 | -5.9945904 | -2.7197598 |
| C  | -2.6396596 | -2.6118899 | -2.9173240 |
| C  | -4.1956577 | -5.8529973 | -1.7545815 |
| C  | -4.5101259 | -3.9376222 | -3.7976073 |
| C  | -3.4882059 | -3.7877698 | -2.8260053 |
| C  | -5.3731884 | -5.0381180 | -3.7392924 |
| C  | -3.3330923 | -4.7558085 | -1.8022625 |
| O  | -1.7574294 | -2.2702966 | -2.0985244 |
| H  | -5.8897167 | -6.8623994 | -2.6757882 |
| H  | -4.6230853 | -3.1777000 | -4.5870029 |
| H  | -4.0804257 | -6.6046267 | -0.9593937 |
| H  | -6.1702125 | -5.1554813 | -4.4883946 |
| H  | -2.5516800 | -4.6234779 | -1.0388497 |
| Br | -1.9668894 | -3.6440404 | 1.4043942  |
| Zn | -1.3904867 | -1.9316782 | -0.0835763 |
| H  | -6.2104281 | -2.7473136 | -1.7380809 |
| C  | -4.9626788 | -1.7885277 | -0.2200028 |
| C  | -6.1437247 | -1.8105257 | -1.1384346 |
| C  | -4.1604763 | -0.7459910 | -0.5632229 |
| C  | -2.8563944 | -0.2368530 | -0.1138944 |
| C  | -4.7933857 | -0.0733386 | -1.7258769 |
| O  | -5.9568488 | -0.7074225 | -2.0445850 |
| O  | -4.3543510 | 0.8900059  | -2.3390106 |
| H  | -7.1148318 | -1.6788843 | -0.6114975 |
| H  | -4.7952479 | -2.5225327 | 0.5807750  |
| H  | -2.7857840 | -1.9436168 | -3.8031613 |
| H  | -2.6418826 | -0.4783584 | 0.9516223  |
| H  | -2.8749954 | 0.8797551  | -0.0714053 |

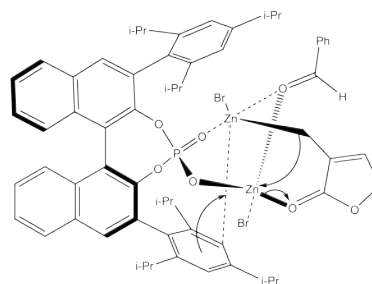

Energy(Hartree)= -11970.00796177  
number of imaginary frequencies: 2

|   |            |            |            |
|---|------------|------------|------------|
| C | 1.4242371  | 2.3294738  | 1.5262342  |
| C | 2.8248888  | 2.3825939  | 1.5415402  |
| C | 3.4431038  | 3.6850433  | 1.6136086  |
| C | 4.8481975  | 3.8853578  | 1.4614587  |
| C | 2.6072683  | 4.8457927  | 1.8122894  |
| C | 3.2162471  | 6.1312594  | 1.9303596  |
| C | 1.1901115  | 4.7031965  | 1.8230879  |
| H | 0.5687646  | 5.6031080  | 1.9443820  |
| C | 0.5738386  | 3.4746638  | 1.6167290  |
| C | 3.9283980  | -1.0867910 | 0.2935741  |
| C | 5.0265383  | -1.3397802 | 1.1058630  |
| H | 5.5826676  | -2.2820780 | 0.9850875  |
| C | 5.4058577  | -0.4504667 | 2.1537418  |
| C | 6.4740685  | -0.7786364 | 3.0415082  |
| C | 4.6497644  | 0.7600633  | 2.3796271  |
| C | 4.9480204  | 1.5326280  | 3.5417210  |
| C | 3.6111205  | 1.1182355  | 1.4415283  |
| C | 3.2988590  | 0.1923465  | 0.4411618  |
| O | 0.7917850  | 1.0918361  | 1.4341127  |
| O | 2.3135630  | 0.5185233  | -0.4885030 |
| P | 0.7491416  | 0.3765248  | -0.0454625 |
| O | -0.0693486 | 1.1662453  | -1.0714189 |
| O | 0.3425030  | -1.0797120 | 0.2162323  |
| C | 4.5890879  | 6.2847164  | 1.8155227  |
| C | 5.4066191  | 5.1519868  | 1.5604176  |
| H | 2.5668903  | 7.0056531  | 2.0943701  |
| H | 5.0443033  | 7.2831467  | 1.9008088  |
| H | 5.4917137  | 3.0195610  | 1.2539761  |
| H | 6.4925796  | 5.2788487  | 1.4334052  |
| C | 5.9789081  | 1.1720720  | 4.3988233  |
| C | 6.7640221  | 0.0182853  | 4.1384899  |
| H | 4.3441260  | 2.4237651  | 3.7603111  |
| H | 6.1843905  | 1.7842791  | 5.2901465  |
| H | 7.5857881  | -0.2528005 | 4.8186308  |
| H | 7.0515437  | -1.6964836 | 2.8487918  |
| C | -1.4833754 | 3.8272329  | 0.1936484  |
| C | -0.9039463 | 3.3338610  | 1.4030921  |
| C | -2.8637752 | 3.6553492  | -0.0091310 |
| C | -1.7203581 | 2.6682570  | 2.3559653  |
| C | -3.1034842 | 2.5478972  | 2.1119658  |
| C | -3.6998852 | 3.0329720  | 0.9372263  |
| H | -3.3132087 | 4.0135877  | -0.9488994 |
| C | -1.1548125 | 2.0883682  | 3.6511624  |
| H | -3.7263109 | 2.0416650  | 2.8644926  |
| C | -1.4111784 | 0.5736970  | 3.7628203  |
| H | -2.4958981 | 0.3429769  | 3.8164181  |
| H | -0.9424016 | 0.1642546  | 4.6810353  |
| H | -0.9804808 | 0.0303151  | 2.8993093  |
| C | -1.6919256 | 2.8459566  | 4.8795542  |
| H | -0.0559487 | 2.2353523  | 3.6366053  |
| H | -2.7926411 | 2.7375954  | 4.9745920  |
| H | -1.4669833 | 3.9295868  | 4.8126527  |
| H | -1.2353480 | 2.4561791  | 5.8127791  |
| C | -5.1967089 | 2.9401866  | 0.6582818  |
| C | -5.9154229 | 1.8244576  | 1.4280001  |

## TS2-8-r-transmetall

|    |            |            |            |    |            |            |            |
|----|------------|------------|------------|----|------------|------------|------------|
| H  | -6.9659112 | 1.7350567  | 1.0839253  | Br | -1.9337382 | -3.7156904 | 1.3643573  |
| H  | -5.9479482 | 2.0315423  | 2.5182971  | Zn | -1.3640581 | -1.9650935 | -0.0778507 |
| H  | -5.4257778 | 0.8401580  | 1.2856677  | H  | -6.1970570 | -2.7520215 | -1.7446604 |
| C  | -5.8704315 | 4.3028850  | 0.9169175  | C  | -4.9425475 | -1.8374091 | -0.2043429 |
| H  | -5.2942371 | 2.7181370  | -0.4278374 | C  | -6.1301559 | -1.8331762 | -1.1170534 |
| H  | -6.9472965 | 4.2716429  | 0.6505534  | C  | -4.1465182 | -0.7822189 | -0.5213023 |
| H  | -5.3936042 | 5.1094760  | 0.3251367  | C  | -2.8420498 | -0.2818465 | -0.0699368 |
| H  | -5.7891798 | 4.5809930  | 1.9886904  | C  | -4.7891214 | -0.0757634 | -1.6606281 |
| C  | -0.6666698 | 4.5530137  | -0.8770798 | O  | -5.9551520 | -0.7038423 | -1.9887611 |
| C  | -0.9800649 | 4.0937060  | -2.3106559 | O  | -4.3544422 | 0.9048497  | -2.2454626 |
| H  | -0.3091380 | 4.6083775  | -3.0282193 | H  | -7.0987712 | -1.7212576 | -0.5795402 |
| H  | -2.0200855 | 4.3318720  | -2.6146977 | H  | -4.7607840 | -2.5962033 | 0.5699794  |
| H  | -0.8247006 | 3.0064386  | -2.4358486 | H  | -2.7553975 | -1.9503082 | -3.8043651 |
| C  | -0.8583673 | 6.0783410  | -0.7523934 | H  | -2.6187005 | -0.5466579 | 0.9880447  |
| H  | 0.4029547  | 4.3275183  | -0.6918604 | H  | -2.8603688 | 0.8337033  | -0.0063512 |
| H  | -0.2235142 | 6.6159240  | -1.4866798 |    |            |            |            |
| H  | -0.6014411 | 6.4510827  | 0.2589605  |    |            |            |            |
| H  | -1.9150456 | 6.3573965  | -0.9481794 |    |            |            |            |
| H  | -0.3804327 | -4.6627449 | -2.2914814 |    |            |            |            |
| H  | 4.7347011  | -2.0950993 | -4.2445751 |    |            |            |            |
| H  | 2.7022269  | -5.1964444 | 2.9245224  |    |            |            |            |
| C  | 0.5445623  | -4.6094873 | -2.9107428 |    |            |            |            |
| H  | 3.5988405  | 0.9357558  | -4.0206485 |    |            |            |            |
| H  | -0.6750593 | -4.6304029 | -4.7232047 |    |            |            |            |
| H  | 2.1141898  | -2.8220762 | 3.5120181  |    |            |            |            |
| C  | 1.5187288  | -3.7329011 | -2.1279105 |    |            |            |            |
| C  | 5.0865340  | -1.3942500 | -3.4586089 |    |            |            |            |
| C  | 0.1558974  | -4.0423840 | -4.2820352 |    |            |            |            |
| H  | 1.0039887  | -4.0939503 | -4.9964328 |    |            |            |            |
| C  | 2.2564592  | -2.7002300 | -2.7221717 |    |            |            |            |
| C  | 2.4112967  | -4.9838368 | 1.8758289  |    |            |            |            |
| H  | 1.3169143  | -6.4924823 | -2.0606864 |    |            |            |            |
| C  | 1.7116172  | -3.9706676 | -0.7523707 |    |            |            |            |
| C  | 1.0806136  | -6.0480416 | -3.0479318 |    |            |            |            |
| H  | 0.3385693  | -6.7031521 | -3.5502753 |    |            |            |            |
| H  | 1.1386052  | -4.7810024 | -0.2772573 |    |            |            |            |
| C  | 3.0178739  | 0.0788637  | -3.6223602 |    |            |            |            |
| H  | 5.6901716  | -0.6053530 | -3.9539073 |    |            |            |            |
| H  | 5.7522053  | -1.9621341 | -2.7773988 |    |            |            |            |
| C  | 3.1154247  | -1.8732849 | -1.9732998 |    |            |            |            |
| C  | 1.9077114  | -2.5847161 | 2.4479446  |    |            |            |            |
| C  | 2.5756434  | -3.1968891 | 0.0402077  |    |            |            |            |
| H  | 2.9554313  | -5.6919111 | 1.2182860  |    |            |            |            |
| H  | 1.3257501  | -5.1996530 | 1.7942372  |    |            |            |            |
| C  | 3.8972626  | -0.7784770 | -2.6956102 |    |            |            |            |
| C  | 3.2569372  | -2.1006939 | -0.5799275 |    |            |            |            |
| C  | 2.7264237  | -3.5186383 | 1.5339056  |    |            |            |            |
| H  | 2.1336186  | 0.4807997  | -3.0910327 |    |            |            |            |
| H  | 2.1476473  | -1.5171654 | 2.2869656  |    |            |            |            |
| H  | 2.6503880  | -0.4978668 | -4.4964258 |    |            |            |            |
| H  | -0.1604958 | -2.9820454 | -4.2215204 |    |            |            |            |
| H  | 0.8223249  | -2.7135037 | 2.2679610  |    |            |            |            |
| H  | 2.0121879  | -6.0591429 | -3.6514562 |    |            |            |            |
| H  | 4.3241511  | -0.1046982 | -1.9247039 |    |            |            |            |
| H  | 3.7948360  | -3.3591071 | 1.7861087  |    |            |            |            |
| H  | 2.1508205  | -2.5052763 | -3.7983918 |    |            |            |            |
| Zn | -1.7312176 | 0.3456736  | -1.8415900 |    |            |            |            |
| Br | -1.5749307 | 0.4505856  | -4.1628005 |    |            |            |            |
| C  | -5.2610138 | -5.9738326 | -2.7628004 |    |            |            |            |
| C  | -2.6295494 | -2.6279624 | -2.9211770 |    |            |            |            |
| C  | -4.2521622 | -5.8496219 | -1.7868107 |    |            |            |            |
| C  | -4.5148320 | -3.9235999 | -3.8241632 |    |            |            |            |
| C  | -3.5012347 | -3.7926346 | -2.8427680 |    |            |            |            |
| C  | -5.3951303 | -5.0113233 | -3.7798658 |    |            |            |            |
| C  | -3.3718481 | -4.7654390 | -1.8212462 |    |            |            |            |
| O  | -1.7557750 | -2.3061467 | -2.0906091 |    |            |            |            |
| H  | -5.9502567 | -6.8319221 | -2.7298795 |    |            |            |            |
| H  | -4.6079396 | -3.1573766 | -4.6102016 |    |            |            |            |
| H  | -4.1561829 | -6.6038990 | -0.9914426 |    |            |            |            |
| H  | -6.1856147 | -5.1140160 | -4.5381814 |    |            |            |            |
| H  | -2.5986195 | -4.6448528 | -1.0466188 |    |            |            |            |

### TS2-8r-2; COSMO

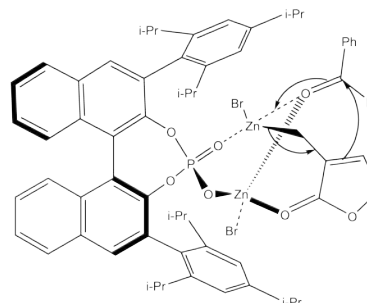

Energy(Hartree)= -11970.00974844

|   |            |            |            |
|---|------------|------------|------------|
| C | 1.1970492  | 2.3305655  | 1.4256306  |
| C | 2.5952527  | 2.3046550  | 1.3573295  |
| C | 3.2929636  | 3.5690876  | 1.2688129  |
| C | 4.6913784  | 3.6721375  | 0.9985345  |
| C | 2.5444718  | 4.7920951  | 1.4272309  |
| C | 3.2302661  | 6.0435448  | 1.4030910  |
| C | 1.1265070  | 4.7353282  | 1.5259933  |
| H | 0.5606628  | 5.6763014  | 1.5998557  |
| C | 0.4299990  | 3.5356366  | 1.4468447  |
| C | 3.7165777  | -1.1635694 | 0.1390593  |
| C | 4.9041992  | -1.3142768 | 0.8461677  |
| H | 5.5477549  | -2.1819827 | 0.6357574  |
| C | 5.2843267  | -0.4146538 | 1.8820877  |
| C | 6.4399788  | -0.6555047 | 2.6844632  |
| C | 4.4632766  | 0.7387057  | 2.1587758  |
| C | 4.7999088  | 1.5548149  | 3.2797220  |
| C | 3.3322435  | 1.0130329  | 1.3035237  |
| C | 2.9633898  | 0.0306967  | 0.3776664  |
| O | 0.4934869  | 1.1274001  | 1.5244989  |
| O | 1.8472288  | 0.2406494  | -0.4316716 |
| P | 0.3433300  | 0.1688078  | 0.2032184  |
| O | -0.5531111 | 0.7930761  | -0.8851659 |
| O | -0.0398709 | -1.2147662 | 0.7283301  |
| C | 4.5971253  | 6.1033444  | 1.1822511  |
| C | 5.3258409  | 4.9058332  | 0.9567427  |
| H | 2.6431473  | 6.9652399  | 1.5402099  |
| H | 5.1135350  | 7.0749605  | 1.1575825  |
| H | 5.2709554  | 2.7588409  | 0.8103045  |
| H | 6.4038152  | 4.9542176  | 0.7397057  |
| C | 5.9160330  | 1.2782966  | 4.0571945  |
| C | 6.7558240  | 0.1753699  | 3.7485071  |
| H | 4.1556345  | 2.4089359  | 3.5305518  |
| H | 6.1486415  | 1.9174908  | 4.9224778  |
| H | 7.6444096  | -0.0279946 | 4.3652861  |
| H | 7.0657105  | -1.5317908 | 2.4530581  |
| C | -1.5982027 | 3.8284432  | -0.0079656 |
| C | -1.0570121 | 3.5129463  | 1.2754776  |

|   |            |            |            |    |            |            |            |
|---|------------|------------|------------|----|------------|------------|------------|
| C | -2.9942392 | 3.8034835  | -0.1674566 | H  | 3.8224493  | 0.0402463  | -1.9974156 |
| C | -1.9182632 | 3.1921030  | 2.3516271  | H  | 4.0488379  | -3.5100665 | 1.4842794  |
| C | -3.3119153 | 3.2267714  | 2.1465130  | H  | 2.1559497  | -2.6392414 | -4.0244025 |
| C | -3.8747962 | 3.5191512  | 0.8961953  | Zn | -2.4592982 | 0.5698968  | -1.0600453 |
| H | -3.4188587 | 4.0162362  | -1.1604029 | Br | -4.0707273 | 1.2098492  | -2.5954359 |
| C | -1.3735687 | 2.7933543  | 3.7203918  | C  | -4.1149496 | -5.8807056 | -3.5205901 |
| H | -3.9700950 | 2.9808938  | 2.9923738  | C  | -3.7036579 | -2.1350079 | -1.4617579 |
| C | -1.7240511 | 1.3314502  | 4.0577665  | C  | -5.2554523 | -5.1272620 | -3.1820203 |
| H | -2.8219551 | 1.1869589  | 4.1365800  | C  | -2.6927742 | -4.1972618 | -2.4905166 |
| H | -1.2742375 | 1.0340085  | 5.0276365  | C  | -3.8305393 | -3.4436083 | -2.1276366 |
| H | -1.3429399 | 0.6489199  | 3.2737464  | C  | -2.8384366 | -5.4081093 | -3.1809329 |
| C | -1.8370902 | 3.7592462  | 4.8248518  | C  | -5.1135028 | -3.9174347 | -2.4978260 |
| H | -0.2667367 | 2.8623570  | 3.6711103  | O  | -2.5317452 | -1.6529854 | -1.1144077 |
| H | -2.9403930 | 3.7418214  | 4.9460126  | H  | -4.2253336 | -6.8339611 | -4.0596932 |
| H | -1.5425250 | 4.8032537  | 4.5952419  | H  | -1.6909039 | -3.8204677 | -2.2454397 |
| H | -1.3910608 | 3.4825286  | 5.8025412  | H  | -6.2575820 | -5.4862361 | -3.4614249 |
| C | -5.3773655 | 3.5226503  | 0.6317439  | H  | -1.9425199 | -5.9843732 | -3.4547230 |
| C | -6.2209058 | 2.9398789  | 1.7706784  | H  | -6.0065596 | -3.3238399 | -2.2456845 |
| H | -7.2887465 | 2.8988768  | 1.4746887  | Br | -1.0353030 | -4.9001937 | 0.4162849  |
| H | -6.1591337 | 3.5634522  | 2.6875657  | Zn | -1.4050800 | -2.5858877 | 0.3606612  |
| H | -5.9060979 | 1.9106025  | 2.0313643  | H  | -6.4242971 | -1.3356856 | -0.8161898 |
| C | -5.8679302 | 4.9384214  | 0.2686167  | C  | -4.9429798 | -2.4409399 | 0.4308082  |
| H | -5.5234710 | 2.8726725  | -0.2615335 | C  | -6.0083251 | -1.3967236 | 0.2109400  |
| H | -6.9438398 | 4.9275447  | -0.0028796 | C  | -3.9696477 | -1.8486657 | 1.2675907  |
| H | -5.3074168 | 5.3624947  | -0.5878799 | C  | -2.8799164 | -2.3350736 | 1.9902811  |
| H | -5.7385948 | 5.6291937  | 1.1282916  | C  | -4.1001712 | -0.4023004 | 0.9427985  |
| C | -0.7117066 | 4.2651492  | -1.1777283 | O  | -5.3225522 | -0.1329598 | 0.4493974  |
| C | -1.0868888 | 3.6395751  | -2.5296406 | O  | -3.2035430 | 0.4491595  | 0.9528425  |
| H | -0.3709961 | 3.9708009  | -3.3094814 | H  | -6.8586269 | -1.4739066 | 0.9249359  |
| H | -2.1008254 | 3.9336586  | -2.8686994 | H  | -5.1703203 | -3.5161705 | 0.4116075  |
| H | -1.0502237 | 2.5353137  | -2.4911930 | H  | -4.4491215 | -1.3721470 | -1.7703728 |
| C | -0.7123849 | 5.8036395  | -1.2901244 | H  | -2.8843865 | -3.3819042 | 2.3291812  |
| H | 0.3250707  | 3.9430828  | -0.9507220 | H  | -2.3036548 | -1.6083164 | 2.5880147  |
| H | -0.0258571 | 6.1405953  | -2.0942487 |    |            |            |            |
| H | -0.3968251 | 6.2898384  | -0.3463685 |    |            |            |            |
| H | -1.7300691 | 6.1762594  | -1.5309894 |    |            |            |            |
| H | 0.3719936  | -5.5758370 | -2.6663349 |    |            |            |            |
| H | 4.4501933  | -1.6280424 | -4.5135402 |    |            |            |            |
| H | 3.3246276  | -5.5761097 | 2.5289949  |    |            |            |            |
| C | 1.1883773  | -5.1649612 | -3.3047440 |    |            |            |            |
| H | 2.7952924  | 1.0727656  | -3.9818064 |    |            |            |            |
| H | -0.0227841 | -5.4080614 | -5.1086417 |    |            |            |            |
| H | 2.3257852  | -3.3851203 | 3.2455345  |    |            |            |            |
| C | 1.8872392  | -4.1091588 | -2.4540266 |    |            |            |            |
| C | 4.7117553  | -0.9471831 | -3.6765447 |    |            |            |            |
| C | 0.5548293  | -4.6165462 | -4.5891097 |    |            |            |            |
| H | 1.3248804  | -4.2589720 | -5.3041001 |    |            |            |            |
| C | 2.3188958  | -2.8769275 | -2.9631352 |    |            |            |            |
| C | 2.9990993  | -5.3687590 | 1.4894288  |    |            |            |            |
| H | 2.5803561  | -6.7631997 | -2.6997180 |    |            |            |            |
| C | 2.1506469  | -4.3899094 | -1.0995193 |    |            |            |            |
| C | 2.1494328  | -6.3278069 | -3.6231597 |    |            |            |            |
| H | 1.6280275  | -7.1382465 | -4.1740805 |    |            |            |            |
| H | 1.8140127  | -5.3548265 | -0.6969917 |    |            |            |            |
| C | 2.3977687  | 0.1091632  | -3.6017796 |    |            |            |            |
| H | 5.1282410  | -0.0164807 | -4.1150814 |    |            |            |            |
| H | 5.5111073  | -1.4376314 | -3.0847744 |    |            |            |            |
| C | 2.9629351  | -1.9217060 | -2.1525781 |    |            |            |            |
| C | 2.0629126  | -3.1401799 | 2.1957321  |    |            |            |            |
| C | 2.7864534  | -3.4793606 | -0.2414964 |    |            |            |            |
| H | 3.6729065  | -5.9221829 | 0.8041559  |    |            |            |            |
| H | 1.9758918  | -5.7834306 | 1.3802734  |    |            |            |            |
| C | 3.4792577  | -0.6390197 | -2.8036261 |    |            |            |            |
| C | 3.1725465  | -2.2099588 | -0.7780186 |    |            |            |            |
| C | 3.0260746  | -3.8550950 | 1.2283351  |    |            |            |            |
| H | 1.5141866  | 0.3290196  | -2.9719422 |    |            |            |            |
| H | 2.0908205  | -2.0402783 | 2.0852267  |    |            |            |            |
| H | 2.0582470  | -0.4735220 | -4.4835058 |    |            |            |            |
| H | -0.1338672 | -3.7719023 | -4.3848824 |    |            |            |            |
| H | 1.0200226  | -3.4675753 | 2.0148095  |    |            |            |            |
| H | 2.9933151  | -5.9736573 | -4.2517088 |    |            |            |            |

### TS2-8r-2

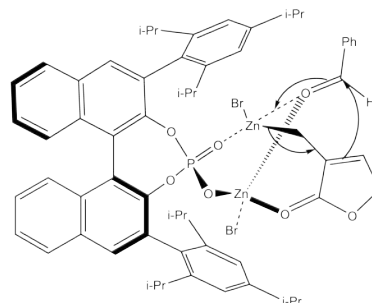

Energy(Hartree)= -11970.00974839  
number of imaginary frequencies: 1

|   |           |            |           |
|---|-----------|------------|-----------|
| C | 1.1970492 | 2.3305655  | 1.4256306 |
| C | 2.5952527 | 2.3046550  | 1.3573295 |
| C | 3.2929636 | 3.5690876  | 1.2688129 |
| C | 4.6913784 | 3.6721375  | 0.9985345 |
| C | 2.5444718 | 4.7920951  | 1.4272309 |
| C | 3.2302661 | 6.0435448  | 1.4030910 |
| C | 1.1265070 | 4.7353282  | 1.5259933 |
| H | 0.5606628 | 5.6763014  | 1.5998557 |
| C | 0.4299990 | 3.5356366  | 1.4468447 |
| C | 3.7165777 | -1.1635694 | 0.1390593 |
| C | 4.9041992 | -1.3142768 | 0.8461677 |
| H | 5.5477549 | -2.1819827 | 0.6357574 |
| C | 5.2843267 | -0.4146538 | 1.8820877 |
| C | 6.4399788 | -0.6555047 | 2.6844632 |
| C | 4.4632766 | 0.7387057  | 2.1587758 |
| C | 4.7999088 | 1.5548149  | 3.2797220 |
| C | 3.3322435 | 1.0130329  | 1.3035237 |
| C | 2.9633898 | 0.0306967  | 0.3776664 |
| O | 0.4934869 | 1.1274001  | 1.5244989 |

|   |            |            |            |    |            |            |            |
|---|------------|------------|------------|----|------------|------------|------------|
| O | 1.8472288  | 0.2406494  | -0.4316716 | H  | 1.8140127  | -5.3548265 | -0.6969917 |
| P | 0.3433300  | 0.1688078  | 0.2032184  | C  | 2.3977687  | 0.1091632  | -3.6017796 |
| O | -0.5531111 | 0.7930761  | -0.8851659 | H  | 5.1282410  | -0.0164807 | -4.1150814 |
| O | -0.0398709 | -1.2147662 | 0.7283301  | H  | 5.5111073  | -1.4376314 | -3.0847744 |
| C | 4.5971253  | 6.1033444  | 1.1822511  | C  | 2.9629351  | -1.9217060 | -2.1525781 |
| C | 5.3258409  | 4.9058332  | 0.9567427  | C  | 2.0629126  | -3.1401799 | 2.1957321  |
| H | 2.6431473  | 6.9652399  | 1.5402099  | C  | 2.7864534  | -3.4793606 | -0.2414964 |
| H | 5.1135350  | 7.0749605  | 1.1575825  | H  | 3.6729065  | -5.9221829 | 0.8041559  |
| H | 5.2709554  | 2.7588409  | 0.8103045  | H  | 1.9758918  | -5.7834306 | 1.3802734  |
| H | 6.4038152  | 4.9542176  | 0.7397057  | C  | 3.4792577  | -0.6390197 | -2.8036261 |
| C | 5.9160330  | 1.2782966  | 4.0571945  | C  | 3.1725465  | -2.2099588 | -0.7780186 |
| C | 6.7558240  | 0.1753699  | 3.7485071  | C  | 3.0260746  | -3.8550950 | 1.2283351  |
| H | 4.1556345  | 2.4089359  | 3.5305518  | H  | 1.5141866  | 0.3290196  | -2.9719422 |
| H | 6.1486415  | 1.9174908  | 4.9224778  | H  | 2.0908205  | -2.0402783 | 2.0852267  |
| H | 7.6444096  | -0.0279946 | 4.3652861  | H  | 2.0582470  | -0.4735220 | -4.4835058 |
| H | 7.0657105  | -1.5317908 | 2.4530581  | H  | -0.1338672 | -3.7719023 | -4.3848824 |
| C | -1.5982027 | 3.8284432  | -0.0079656 | H  | 1.0200226  | -3.4675753 | 2.0148095  |
| C | -1.0570121 | 3.5129463  | 1.2754776  | H  | 2.9933151  | -5.9736573 | -4.2517088 |
| C | -2.9942392 | 3.8034835  | -0.1674566 | H  | 3.8224493  | 0.0402463  | -1.9974156 |
| C | -1.9182632 | 3.1921030  | 2.3516271  | H  | 4.0488379  | -3.5100665 | 1.4842794  |
| C | -3.3119153 | 3.2267714  | 2.1465130  | H  | 2.1559497  | -2.6392414 | -4.0244025 |
| C | -3.8747962 | 3.5191512  | 0.8961953  | Zn | -2.4592982 | 0.5698968  | -1.0600453 |
| H | -3.4188587 | 4.0162362  | -1.1604029 | Br | -4.0707273 | 1.2098492  | -2.5954359 |
| C | -1.3735687 | 2.7933543  | 3.7203918  | C  | -4.1149496 | -5.8807056 | -3.5205901 |
| H | -3.9700950 | 2.9808938  | 2.9923738  | C  | -3.7036579 | -2.1350079 | -1.4617579 |
| C | -1.7240511 | 1.3314502  | 4.0577665  | C  | -5.2554523 | -5.1272620 | -3.1820203 |
| H | -2.8219551 | 1.1869589  | 4.1365800  | C  | -2.6927742 | -4.1972618 | -2.4905166 |
| H | -1.2742375 | 1.0340085  | 5.0276365  | C  | -3.8305393 | -3.4436083 | -2.1276366 |
| H | -1.3429399 | 0.6489199  | 3.2737464  | C  | -2.8384366 | -5.4081093 | -3.1809329 |
| C | -1.8370902 | 3.7592462  | 4.8248518  | C  | -5.1135028 | -3.9174347 | -2.4978260 |
| H | -0.2667367 | 2.8623570  | 3.6711103  | O  | -2.5317452 | -1.6529854 | -1.1144077 |
| H | -2.9403930 | 3.7418214  | 4.9460126  | H  | 4.2253336  | -6.8339611 | -4.0596932 |
| H | -1.5425250 | 4.8032537  | 4.5952419  | H  | -1.6909039 | -3.8204677 | -2.2454397 |
| H | -1.3910608 | 3.4825286  | 5.8025412  | H  | -6.2575820 | -5.4862361 | -3.4614249 |
| C | -5.3773655 | 3.5226503  | 0.6317439  | H  | -1.9425199 | -5.9843732 | -3.4547230 |
| C | -6.2209058 | 2.9398789  | 1.7706784  | H  | -6.0065596 | -3.3238399 | -2.2456845 |
| H | -7.2887465 | 2.8988768  | 1.4746887  | Br | -1.0353030 | -4.9001937 | 0.4162849  |
| H | -6.1591337 | 3.5634522  | 2.6875657  | Zn | -1.4050800 | -2.5858877 | 0.3606612  |
| H | -5.9060979 | 1.9106025  | 2.0313643  | H  | -6.4242971 | -1.3356856 | -0.8161898 |
| C | -5.8679302 | 4.9384214  | 0.2686167  | C  | -4.9429798 | -2.4409399 | 0.4308082  |
| H | -5.5234710 | 2.8726725  | -0.2615335 | C  | -6.0083251 | -1.3967236 | 0.2109400  |
| H | -6.9438398 | 4.9275447  | -0.0028796 | C  | -3.9696477 | -1.8486657 | 1.2675907  |
| H | -5.3074168 | 5.3624947  | -0.5878799 | C  | -2.8799164 | -2.3350736 | 1.9902811  |
| H | -5.7385948 | 5.6291937  | 1.1282916  | C  | -4.1001712 | -0.4023004 | 0.9427985  |
| C | -0.7117066 | 4.2651492  | -1.1777283 | O  | -5.3225522 | -0.1392598 | 0.4493974  |
| C | -1.0868888 | 3.6395751  | -2.5296406 | O  | -3.2035430 | 0.4491595  | 0.9528425  |
| H | -0.3709961 | 3.9708009  | -3.3094814 | H  | -6.8586269 | -1.4739066 | 0.9249359  |
| H | -2.1008254 | 3.9336586  | -2.8686994 | H  | -5.1703203 | -3.5161705 | 0.4116075  |
| H | -1.0502237 | 2.5353137  | -2.4911930 | H  | -4.4491215 | -1.3721470 | -1.7703728 |
| C | -0.7123849 | 5.8036395  | -1.2901244 | H  | -2.8843865 | -3.3819042 | 2.3291812  |
| H | 0.3250707  | 3.9430828  | -0.9507220 | H  | -2.3036548 | -1.6083164 | 2.5880147  |
| H | -0.0258571 | 6.1405953  | -2.0942487 |    |            |            |            |
| H | -0.3968251 | 6.2898384  | -0.3463685 |    |            |            |            |
| H | -1.7300691 | 6.1762594  | -1.5309894 |    |            |            |            |
| H | 0.3719936  | -5.5758370 | -2.6663349 |    |            |            |            |
| H | 4.4501933  | -1.6280424 | -4.5135402 |    |            |            |            |
| H | 3.3246276  | -5.5761097 | 2.5289949  |    |            |            |            |
| C | 1.1883773  | -5.1649612 | -3.3047440 |    |            |            |            |
| H | 2.7952924  | 1.0727656  | -3.9818064 |    |            |            |            |
| H | -0.0227841 | -5.4080614 | -5.1086417 |    |            |            |            |
| H | 2.3257852  | -3.3851203 | 3.2455345  |    |            |            |            |
| C | 1.8872392  | -4.1091588 | -2.4540266 |    |            |            |            |
| C | 4.7117553  | -0.9471831 | -3.6765447 |    |            |            |            |
| C | 0.5548293  | -4.6165462 | -4.5891097 |    |            |            |            |
| H | 1.3248804  | -4.2589720 | -5.3041001 |    |            |            |            |
| C | 2.3188958  | -2.8769275 | -2.9631352 |    |            |            |            |
| C | 2.9990993  | -5.3687590 | 1.4894288  |    |            |            |            |
| H | 2.5803561  | -6.7631997 | -2.6997180 |    |            |            |            |
| C | 2.1506469  | -4.3899094 | -1.0995193 |    |            |            |            |
| C | 2.1494328  | -6.3278069 | -3.6231597 |    |            |            |            |
| H | 1.6280275  | -7.1382465 | -4.1740805 |    |            |            |            |

### int1-8-r; COSMO

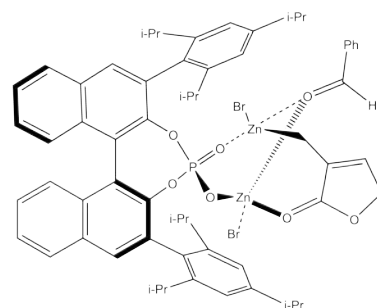

Energy(Hartree)= -11970.04418781

|   |           |           |           |
|---|-----------|-----------|-----------|
| C | 1.0993136 | 2.2948588 | 1.4479761 |
| C | 2.4911360 | 2.4631804 | 1.4695188 |
| C | 3.0049864 | 3.8116980 | 1.5276282 |
| C | 4.3900415 | 4.1195760 | 1.3663982 |
| C | 2.0832762 | 4.9056411 | 1.7200167 |

|   |            |            |            |    |            |            |            |
|---|------------|------------|------------|----|------------|------------|------------|
| C | 2.5885959  | 6.2372639  | 1.8180555  | C  | 1.0533166  | -4.5628266 | -3.1755425 |
| C | 0.6838375  | 4.6467989  | 1.7629948  | H  | 3.6167998  | 1.2848095  | -3.9956226 |
| H | -0.0064109 | 5.4910989  | 1.9103011  | H  | 0.0407795  | -4.6936356 | -5.1066551 |
| C | 0.1661817  | 3.3708307  | 1.5745762  | H  | 2.2956165  | -2.9644294 | 3.3277119  |
| C | 3.9858937  | -0.8619139 | 0.2413148  | C  | 1.9582255  | -3.6520458 | -2.3481364 |
| C | 5.0890972  | -0.9954075 | 1.0747618  | C  | 5.2944628  | -0.9086486 | -3.4879262 |
| H | 5.7613180  | -1.8582671 | 0.9509691  | C  | 0.7857725  | -4.0501621 | -4.5957585 |
| C | 5.3371270  | -0.0821564 | 2.1416532  | H  | 1.7092772  | -4.0695865 | -5.2116794 |
| C | 6.4171025  | -0.2941088 | 3.0508847  | C  | 2.5995963  | -2.5244477 | -2.8819661 |
| C | 4.4468256  | 1.0356150  | 2.3546234  | C  | 2.9462819  | -4.9839260 | 1.6125993  |
| C | 4.6375005  | 1.8368371  | 3.5201369  | H  | 1.7400536  | -6.4227138 | -2.2049916 |
| C | 3.3906333  | 1.2765495  | 1.3989487  | C  | 2.1558053  | -3.9342231 | -0.9822405 |
| C | 3.1940613  | 0.3216457  | 0.3988345  | C  | 1.5876267  | -6.0074805 | -3.2205740 |
| O | 0.5630953  | 1.0118622  | 1.3470640  | H  | 0.8797666  | -6.6741203 | -3.7558110 |
| O | 2.1817165  | 0.5337217  | -0.5330018 | H  | 1.6559358  | -4.8128946 | -0.5519689 |
| P | 0.6295945  | 0.2416767  | -0.1060338 | C  | 3.1016586  | 0.3711722  | -3.6337808 |
| O | -0.2179985 | 0.9769239  | -1.1618619 | H  | 5.8321837  | -0.0422885 | -3.9267117 |
| O | 0.3372399  | -1.2336476 | 0.1425155  | H  | 5.9954426  | -1.4474949 | -2.8183155 |
| C | 3.9448372  | 6.4967187  | 1.6908442  | C  | 3.3482857  | -1.6451433 | -2.0762658 |
| C | 4.8478160  | 5.4278076  | 1.4450520  | C  | 2.0980035  | -2.7037673 | 2.2670691  |
| H | 1.8733091  | 7.0592967  | 1.9783689  | C  | 2.9099186  | -3.1069310 | -0.1358167 |
| H | 4.3209528  | 7.5288180  | 1.7605096  | H  | 3.6031795  | -5.5763617 | 0.9435345  |
| H | 5.0998993  | 3.3055293  | 1.1653300  | H  | 1.9044019  | -5.3417133 | 1.4788211  |
| H | 5.9197669  | 5.6378846  | 1.3093942  | C  | 4.0361346  | -0.4465533 | -2.7267460 |
| C | 5.6843796  | 1.5892068  | 4.3983078  | C  | 3.4734820  | -1.9144392 | -0.6889612 |
| C | 6.5952882  | 0.5272667  | 4.1543923  | C  | 3.0652889  | -3.4744490 | 1.3462723  |
| H | 3.9368717  | 2.6578421  | 3.7260484  | H  | 2.1857674  | 0.6826008  | -3.0959480 |
| H | 5.8049660  | 2.2191555  | 5.2929000  | H  | 2.1993407  | -1.6070173 | 2.1610682  |
| H | 7.4278148  | 0.3461889  | 4.8513262  | H  | 2.7835435  | -0.2009055 | -4.5296843 |
| H | 7.0966751  | -1.1415465 | 2.8686799  | H  | 0.4094078  | -3.0067616 | -4.6063887 |
| C | -2.0243802 | 3.5217254  | 0.3144283  | H  | 1.0481173  | -2.9655250 | 2.0300485  |
| C | -1.3068474 | 3.1134859  | 1.4783260  | H  | 2.5624565  | -6.0453618 | -3.7508886 |
| C | -3.4015343 | 3.2504906  | 0.2460296  | H  | 4.3813516  | 0.2251640  | -1.9136082 |
| C | -1.9864652 | 2.4494553  | 2.5329252  | H  | 4.0935128  | -3.1815085 | 1.6420605  |
| C | -3.3735786 | 2.2280077  | 2.4225260  | H  | 2.5001983  | -2.2925058 | -3.9515486 |
| C | -4.1031496 | 2.6146089  | 1.2878086  | Zn | -1.3436394 | 0.1861505  | -2.5276546 |
| H | -3.9556270 | 3.5444962  | -0.6598850 | Br | -0.8216958 | 0.2768906  | -4.7944111 |
| C | -1.2642968 | 1.9835389  | 3.7960629  | C  | -4.4420141 | -6.1330638 | -2.9949949 |
| H | -3.8877922 | 1.7192596  | 3.2509211  | C  | -2.0833539 | -2.6013224 | -3.1106722 |
| C | -1.3529351 | 0.4576513  | 3.9822938  | C  | -4.3508441 | -5.3342469 | -1.8390774 |
| H | -2.4019017 | 0.1251295  | 4.1306555  | C  | -3.0074558 | -4.5981661 | -4.2061265 |
| H | -0.7745557 | 0.1405719  | 4.8745392  | C  | -2.8911486 | -3.7998847 | -3.0382658 |
| H | -0.9415355 | -0.0732947 | 3.1020342  | C  | -3.7725058 | -5.7669435 | -4.1787950 |
| C | -1.7723735 | 2.7367278  | 5.0393750  | C  | -3.5750716 | -4.1728217 | -1.8528087 |
| H | -0.1905590 | 2.2370187  | 3.6837186  | O  | -1.7700817 | -1.8845829 | -2.1269907 |
| H | -2.8439569 | 2.5221832  | 5.2350671  | H  | -5.0489102 | -7.0515171 | -2.9751827 |
| H | -1.6665748 | 3.8337629  | 4.9156877  | H  | -2.4834909 | -4.2928276 | -5.1252138 |
| H | -1.2008218 | 2.4353447  | 5.9416226  | H  | -4.8809339 | -5.6271252 | -0.9209884 |
| C | -5.6084711 | 2.3959050  | 1.1501119  | H  | -3.8553770 | -6.3951669 | -5.0778171 |
| C | -6.1947936 | 1.3964784  | 2.1538732  | H  | -3.5022427 | -3.5379176 | -0.9601192 |
| H | -7.2619195 | 1.1993043  | 1.9247587  | Br | -1.2206763 | -4.4676457 | 0.6346955  |
| H | -6.1510898 | 1.7888453  | 3.1914067  | Zn | -1.4506924 | -2.1521366 | 0.2591280  |
| H | -5.6550747 | 0.4290046  | 2.1324903  | H  | -6.5206870 | -1.9377266 | -1.7021698 |
| C | -6.3602933 | 3.7405926  | 1.2228742  | C  | -5.2926041 | -1.3877893 | 0.0363654  |
| H | -5.7719409 | 1.9830304  | 0.1272827  | C  | -6.1813203 | -1.0572980 | -1.1114662 |
| H | -7.4478328 | 3.5987869  | 1.0524863  | C  | -4.0680018 | -0.7976144 | -0.1330530 |
| H | -5.9861806 | 4.4599155  | 0.4674674  | C  | -2.8640736 | -0.7701153 | 0.6973348  |
| H | -6.2272346 | 4.2041288  | 2.2228356  | C  | -4.1503727 | -0.1067343 | -1.4420056 |
| C | -1.3561054 | 4.2913494  | -0.8265715 | O  | -5.3777935 | -0.2352784 | -1.9806003 |
| C | -1.7331881 | 3.7870868  | -2.2278000 | O  | -3.2863405 | 0.5382319  | -2.0609711 |
| H | -1.1871815 | 4.3623722  | -3.0025746 | H  | -7.0862315 | -0.4772528 | -0.8223379 |
| H | -2.8165151 | 3.8895422  | -2.4416616 | H  | -5.6169605 | -1.9899100 | 0.8958030  |
| H | -1.4579693 | 2.7250157  | -2.3545774 | H  | -1.7423415 | -2.2719270 | -4.1224128 |
| C | -1.6669085 | 5.7973125  | -0.7048591 | H  | -3.1175238 | -0.9242482 | 1.7641858  |
| H | -0.2599708 | 4.1601970  | -0.7211255 | H  | -2.3632109 | 0.2146273  | 0.6030629  |
| H | -1.1350809 | 6.3747641  | -1.4892212 |    |            |            |            |
| H | -1.3673776 | 6.2036309  | 0.2814469  |    |            |            |            |
| H | -2.7552516 | 5.9834082  | -0.8229700 |    |            |            |            |
| H | 0.0808395  | -4.5937636 | -2.6279522 |    |            |            |            |
| H | 5.0262962  | -1.5967215 | -4.3171875 |    |            |            |            |
| H | 3.2334157  | -5.2055761 | 2.6607316  |    |            |            |            |

int1-8-r

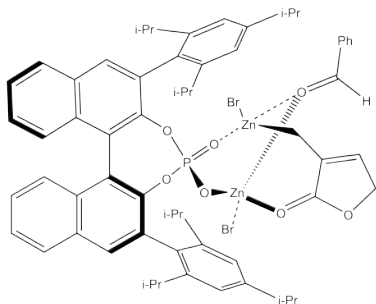

Energy(Hartree)= -11970.03091132

|   |            |            |            |
|---|------------|------------|------------|
| C | 1.0986476  | 2.2991592  | 1.4564178  |
| C | 2.4907485  | 2.4650407  | 1.4779711  |
| C | 3.0066311  | 3.8126556  | 1.5376068  |
| C | 4.3920780  | 4.1181702  | 1.3775343  |
| C | 2.0872311  | 4.9081464  | 1.7308706  |
| C | 2.5956062  | 6.2378793  | 1.8314874  |
| C | 0.6875638  | 4.6517681  | 1.7710729  |
| H | -0.0023591 | 5.4965203  | 1.9172058  |
| C | 0.1676891  | 3.3773116  | 1.5806976  |
| C | 3.9764212  | -0.8597947 | 0.2385958  |
| C | 5.0819009  | -0.9955697 | 1.0683926  |
| H | 5.7520574  | -1.8592055 | 0.9388970  |
| C | 5.3350563  | -0.0856378 | 2.1364946  |
| C | 6.4175276  | -0.2998790 | 3.0414263  |
| C | 4.4469785  | 1.0326161  | 2.3548991  |
| C | 4.6429346  | 1.8311311  | 3.5210496  |
| C | 3.3882367  | 1.2771474  | 1.4031485  |
| C | 3.1872886  | 0.3248880  | 0.4012836  |
| O | 0.5591598  | 1.0178131  | 1.3570710  |
| O | 2.1728085  | 0.5408077  | -0.5268052 |
| P | 0.6237744  | 0.2458096  | -0.0957154 |
| O | -0.2339358 | 0.9760935  | -1.1459653 |
| O | 0.3374734  | -1.2301610 | 0.1571246  |
| C | 3.9519330  | 6.4948391  | 1.7062481  |
| C | 4.8523523  | 5.4248360  | 1.4593181  |
| H | 1.8817082  | 7.0610858  | 1.9919688  |
| H | 4.3299333  | 7.5260458  | 1.7781112  |
| H | 5.0994336  | 3.3023159  | 1.1757412  |
| H | 5.9248453  | 5.6326281  | 1.3249066  |
| C | 5.6927483  | 1.5810442  | 4.3943042  |
| C | 6.6010821  | 0.5189147  | 4.1452807  |
| H | 3.9437307  | 2.6524742  | 3.7299289  |
| H | 5.8173512  | 2.2094225  | 5.2893806  |
| H | 7.4360227  | 0.3353954  | 4.8385849  |
| H | 7.0953138  | -1.1478703 | 2.8552439  |
| C | -2.0159288 | 3.5242924  | 0.3087158  |
| C | -1.3053748 | 3.1224249  | 1.4788469  |
| C | -3.3922639 | 3.2521721  | 0.2341184  |
| C | -1.9906667 | 2.4645326  | 2.5331318  |
| C | -3.3767854 | 2.2416541  | 2.4158989  |
| C | -4.0995157 | 2.6219976  | 1.2751113  |
| H | -3.9407178 | 3.5399217  | -0.6771957 |
| C | -1.2748351 | 2.0077726  | 3.8031292  |
| H | -3.8955192 | 1.7382099  | 3.2447153  |
| C | -1.3613077 | 0.4832612  | 3.9995511  |
| H | -2.4103319 | 0.1489778  | 4.1439024  |
| H | -0.7884320 | 0.1729258  | 4.8975397  |
| H | -0.9424421 | -0.0532901 | 3.1263910  |
| C | -1.7903392 | 2.7694375  | 5.0379957  |
| H | -0.2009686 | 2.2621935  | 3.6941234  |
| H | -2.8627336 | 2.5558335  | 5.2298683  |
| H | -1.6857996 | 3.8654909  | 4.9066088  |
| H | -1.2238618 | 2.4758180  | 5.9459134  |
| C | -5.6045220 | 2.4050904  | 1.1303722  |
| C | -6.1969315 | 1.4066398  | 2.1316472  |
| H | -7.2641946 | 1.2121215  | 1.9002060  |

|    |            |            |            |
|----|------------|------------|------------|
| H  | -6.1567117 | 1.7987453  | 3.1693030  |
| H  | -5.6589857 | 0.4381923  | 2.1121149  |
| C  | -6.3545303 | 3.7507631  | 1.2001685  |
| H  | -5.7642894 | 1.9916914  | 0.1069174  |
| H  | -7.4418416 | 3.6126686  | 1.0250292  |
| H  | -5.9747558 | 4.4699681  | 0.4477695  |
| H  | -6.2241605 | 4.2139553  | 2.2003958  |
| C  | -1.3404051 | 4.2878971  | -0.8320214 |
| C  | -1.7171731 | 3.7857089  | -2.2338556 |
| H  | -1.1627644 | 4.3538349  | -3.0077010 |
| H  | -2.7983085 | 3.8986502  | -2.4533602 |
| H  | -1.4519722 | 2.7212133  | -2.3597799 |
| C  | -1.6423224 | 5.7957827  | -0.7124151 |
| H  | -0.2454246 | 4.1496434  | -0.7237606 |
| H  | -1.1060293 | 6.3696474  | -1.4962610 |
| H  | -1.3425294 | 6.2017648  | 0.2737447  |
| H  | -2.7292334 | 5.9886402  | -0.8319433 |
| H  | 0.0577813  | -4.5742582 | -2.6361382 |
| H  | 4.9984652  | -1.5854894 | -4.3248036 |
| H  | 3.2362747  | -5.2153969 | 2.6426301  |
| C  | 1.0330889  | -4.5501409 | -3.1793459 |
| H  | 3.6026566  | 1.2990380  | -3.9929000 |
| H  | 0.0346755  | -4.6882210 | -5.1173908 |
| H  | 2.2961802  | -2.9776637 | 3.3253333  |
| C  | 1.9391285  | -3.6404586 | -2.3517813 |
| C  | 5.2720355  | -0.9009651 | -3.4945771 |
| C  | 0.7760009  | -4.0425569 | -4.6033467 |
| H  | 1.7038050  | -4.0669801 | -5.2125023 |
| C  | 2.5775546  | -2.5106943 | -2.8840273 |
| C  | 2.9433501  | -4.9882354 | 1.5973577  |
| H  | 1.7016748  | -6.4104919 | -2.1979001 |
| C  | 2.1408183  | -3.9270401 | -0.9876879 |
| C  | 1.5588094  | -5.9979401 | -3.2156564 |
| H  | 0.8506381  | -6.6627364 | -3.7529261 |
| H  | 1.6425823  | -4.8069215 | -0.5583021 |
| C  | 3.0839097  | 0.3886969  | -3.6282887 |
| H  | 5.8121880  | -0.0359400 | -3.9328959 |
| H  | 5.9725874  | -1.4456191 | -2.8295360 |
| C  | 3.3296626  | -1.6347623 | -2.0783874 |
| C  | 2.0933757  | -2.7134080 | 2.2667496  |
| C  | 2.8983759  | -3.1031853 | -0.1413959 |
| H  | 3.5972612  | -5.5760312 | 0.9214930  |
| H  | 1.9011505  | -5.3465404 | 1.4685605  |
| C  | 4.0182880  | -0.4359853 | -2.7277740 |
| C  | 3.4601112  | -1.9092761 | -0.6926872 |
| C  | 3.0587886  | -3.4771966 | 1.3385098  |
| H  | 2.1743448  | 0.7080223  | -3.0847670 |
| H  | 2.1908346  | -1.6159190 | 2.1657469  |
| H  | 2.7549959  | -0.1789510 | -4.5229379 |
| H  | 0.4019647  | -2.9984323 | -4.6230298 |
| H  | 1.0433563  | -2.9793025 | 2.0350972  |
| H  | 2.5371231  | -6.0438206 | -3.7385008 |
| H  | 4.3694000  | 0.2316163  | -1.9136786 |
| H  | 4.0872992  | -3.1835026 | 1.6327043  |
| H  | 2.4746885  | -2.2744871 | -3.9522681 |
| Zn | -1.3338322 | 0.1891384  | -2.5328148 |
| Br | -0.8305114 | 0.2366922  | -4.7964150 |
| C  | -4.4142228 | -6.1561383 | -3.0120747 |
| C  | -2.0831543 | -2.6022761 | -3.1080726 |
| C  | -4.3212742 | -5.3678519 | -1.8504238 |
| C  | -3.0016296 | -4.5972757 | -4.2177760 |
| C  | -2.8860496 | -3.8078218 | -3.0449096 |
| C  | -3.7569409 | -5.7723603 | -4.1969466 |
| C  | -3.5581723 | -4.1972535 | -1.8591422 |
| O  | -1.7801440 | -1.8915911 | -2.1198061 |
| H  | -5.0105316 | -7.0816837 | -2.9962523 |
| H  | -2.4818423 | -4.2799024 | -5.1352083 |
| H  | -4.8353097 | -5.6763193 | -0.9282280 |
| H  | -3.8395882 | -6.3936130 | -5.1009226 |
| H  | -3.4814161 | -3.5710757 | -0.9608589 |
| Br | -1.2313214 | -4.4853775 | 0.6153221  |

|    |            |            |            |
|----|------------|------------|------------|
| Zn | -1.4333988 | -2.1684385 | 0.2805734  |
| H  | -6.4918620 | -1.9773346 | -1.6839505 |
| C  | -5.2742674 | -1.4256951 | 0.0636921  |
| C  | -6.1610209 | -1.0963813 | -1.0878490 |
| C  | -4.0539548 | -0.8241467 | -0.0982535 |
| C  | -2.8525495 | -0.7895895 | 0.7304263  |
| C  | -4.1364348 | -0.1275414 | -1.4073960 |
| O  | -5.3633026 | -0.2662433 | -1.9504802 |
| O  | -3.2761474 | 0.5245863  | -2.0172468 |
| H  | -7.0714920 | -0.5235093 | -0.7994191 |
| H  | -5.5955526 | -2.0318987 | 0.9213757  |
| H  | -1.7380916 | -2.2633326 | -4.1161961 |
| H  | -3.0988728 | -0.9527716 | 1.7975249  |
| H  | -2.3539776 | 0.1958309  | 0.6351830  |

### int2-8-r-transmetall; COSMO

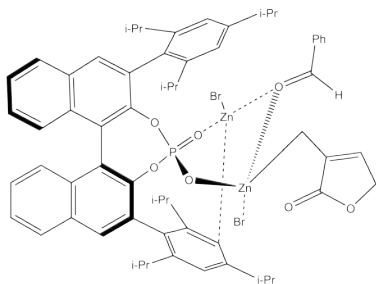

Energy(Hartree)= -11970.03284038

|   |            |            |            |
|---|------------|------------|------------|
| C | 1.3868982  | 2.3772756  | 1.5179561  |
| C | 2.7895495  | 2.3580851  | 1.5326363  |
| C | 3.4775093  | 3.6274011  | 1.5722194  |
| C | 4.8904765  | 3.7510203  | 1.4081017  |
| C | 2.7049286  | 4.8350288  | 1.7451478  |
| C | 3.3800036  | 6.0903891  | 1.8273042  |
| C | 1.2824538  | 4.7663888  | 1.7734466  |
| H | 0.7100998  | 5.6991902  | 1.8876066  |
| C | 0.6000921  | 3.5678774  | 1.6008793  |
| C | 3.7521480  | -1.1620548 | 0.3246749  |
| C | 4.8527715  | -1.4511452 | 1.1198195  |
| H | 5.3848164  | -2.4067661 | 0.9969864  |
| C | 5.2685205  | -0.5664570 | 2.1586412  |
| C | 6.3368884  | -0.9230929 | 3.0359155  |
| C | 4.5519809  | 0.6685844  | 2.3855034  |
| C | 4.8880636  | 1.4399958  | 3.5379881  |
| C | 3.5154656  | 1.0569870  | 1.4570709  |
| C | 3.1577554  | 0.1333475  | 0.4714905  |
| O | 0.6871310  | 1.1747834  | 1.4565700  |
| O | 2.1785576  | 0.4743032  | -0.4486200 |
| P | 0.6018046  | 0.3943333  | 0.0151226  |
| O | -0.1614156 | 1.1364188  | -1.0766384 |
| O | 0.1630339  | -1.0244953 | 0.3860518  |
| C | 4.7587378  | 6.1696961  | 1.7017491  |
| C | 5.5148823  | 4.9894795  | 1.4714582  |
| H | 2.7775222  | 7.0008268  | 1.9727319  |
| H | 5.2656559  | 7.1449507  | 1.7592232  |
| H | 5.4894873  | 2.8501869  | 1.2169739  |
| H | 6.6051270  | 5.0563916  | 1.3351430  |
| C | 5.9165130  | 1.0517041  | 4.3862503  |
| C | 6.6626113  | -0.1283055 | 4.1248962  |
| H | 4.3157740  | 2.3520688  | 3.7558262  |
| H | 6.1516656  | 1.6624806  | 5.2711737  |
| H | 7.4829755  | -0.4201440 | 4.7980474  |
| H | 6.8846150  | -1.8588914 | 2.8427883  |
| C | -1.4851557 | 3.9912978  | 0.2377082  |
| C | -0.8883602 | 3.5001822  | 1.4381837  |
| C | -2.8797828 | 3.8943162  | 0.0932299  |

|   |            |            |            |
|---|------------|------------|------------|
| C | -1.7012397 | 2.9113148  | 2.4430132  |
| C | -3.0952955 | 2.8505543  | 2.2489508  |
| C | -3.7096662 | 3.3322080  | 1.0818091  |
| H | -3.3464736 | 4.2519406  | -0.8385188 |
| C | -1.1162927 | 2.3536344  | 3.7392998  |
| H | -3.7146575 | 2.3919512  | 3.0340273  |
| C | -1.4446819 | 0.8603793  | 3.9240065  |
| H | -2.5365786 | 0.6927772  | 4.0318253  |
| H | -0.9569414 | 0.4659940  | 4.8395643  |
| H | -1.0879375 | 0.2629509  | 3.0622773  |
| C | -1.5666948 | 3.1872633  | 4.9535980  |
| H | -0.0123696 | 2.4431412  | 3.6797911  |
| H | -2.6675001 | 3.1409111  | 5.0898499  |
| H | -1.2882260 | 4.2542019  | 4.8343590  |
| H | -1.0968341 | 2.8105244  | 5.8858954  |
| C | -5.2158436 | 3.2739348  | 0.8464585  |
| C | -5.9358756 | 2.1874271  | 1.6550510  |
| H | -6.9959158 | 2.1147969  | 1.3385342  |
| H | -5.9327325 | 2.4085704  | 2.7433954  |
| H | -5.4689792 | 1.1922896  | 1.5089470  |
| C | -5.8507750 | 4.6570912  | 1.0923154  |
| H | -5.3506868 | 3.0221717  | -0.2286092 |
| H | -6.9342146 | 4.6441947  | 0.8520992  |
| H | -5.3713594 | 5.4398132  | 0.4704392  |
| H | -5.7382548 | 4.9570024  | 2.1558289  |
| C | -0.6655678 | 4.6251810  | -0.8879920 |
| C | -1.0610568 | 4.1267818  | -2.2881483 |
| H | -0.3776795 | 4.5533651  | -3.0509076 |
| H | -2.0902103 | 4.4319446  | -2.5684030 |
| H | -0.9955228 | 3.0255284  | -2.3621506 |
| C | -0.7546574 | 6.1632057  | -0.8227632 |
| H | 0.3944637  | 4.3388440  | -0.7308461 |
| H | -0.1218231 | 6.6284999  | -1.6068710 |
| H | -0.4275301 | 6.5581726  | 0.1596085  |
| H | -1.7999269 | 6.5012830  | -0.9841975 |
| H | -0.4733880 | -4.8959789 | -2.4197780 |
| H | 4.4815468  | -2.1169018 | -4.2227400 |
| H | 2.4762778  | -5.3363815 | 2.8495932  |
| C | 0.4286851  | -4.6499583 | -3.0197984 |
| H | 3.4256746  | 0.9551349  | -3.9335152 |
| H | -0.8070194 | -4.6755569 | -4.8143322 |
| H | 2.1724911  | -2.9431513 | 3.5443479  |
| C | 1.2816613  | -3.7223437 | -2.1666486 |
| C | 4.8567460  | -1.4389874 | -3.4277040 |
| C | -0.0406338 | -4.0296241 | -4.3417814 |
| H | 0.7957763  | -3.9321853 | -5.0646351 |
| C | 2.0136966  | -2.6661545 | -2.7179065 |
| C | 2.1593553  | -5.0801711 | 1.8190906  |
| H | 1.4679172  | -6.4664071 | -2.3137516 |
| C | 1.4393875  | -3.9834796 | -0.7717503 |
| C | 1.1766890  | -5.9768298 | -3.2645972 |
| H | 0.5353646  | -6.6827599 | -3.8306956 |
| H | 1.0039176  | -4.9121693 | -0.3674569 |
| C | 2.8274034  | 0.0977324  | -3.5646066 |
| H | 5.4778432  | -0.6586350 | -3.9132503 |
| H | 5.5106065  | -2.0319707 | -2.7565278 |
| C | 2.8857351  | -1.8743347 | -1.9452936 |
| C | 1.8725098  | -2.6678969 | 2.5132873  |
| C | 2.3404327  | -3.2354433 | 0.0415004  |
| H | 2.6433453  | -5.7996239 | 1.1276007  |
| H | 1.0605639  | -5.2288110 | 1.7734485  |
| C | 3.6914772  | -0.7907717 | -2.6521743 |
| C | 3.0323156  | -2.1375006 | -0.5547672 |
| C | 2.5499941  | -3.6267066 | 1.5096693  |
| H | 1.9443818  | 0.4977372  | -3.0295506 |
| H | 2.1480652  | -1.6105703 | 2.3470239  |
| H | 2.4637284  | -0.4523203 | -4.4572225 |
| H | -0.4789435 | -3.0214435 | -4.2012476 |
| H | 0.7689791  | -2.7398994 | 2.4488333  |
| H | 2.1002572  | -5.8018599 | -3.8545747 |
| H | 4.1416558  | -0.1414048 | -1.8757660 |

|    |            |            |            |
|----|------------|------------|------------|
| H  | 3.6424935  | -3.5456906 | 1.6812073  |
| H  | 1.9174925  | -2.4488867 | -3.7900250 |
| Zn | -1.9117736 | 0.3924718  | -1.7749766 |
| Br | -1.8285226 | 0.4686909  | -4.1203815 |
| C  | -4.3388460 | -6.4337908 | -3.1981244 |
| C  | -2.6173274 | -2.5945153 | -2.4704769 |
| C  | -3.4598412 | -6.2841431 | -2.1069645 |
| C  | -4.0948164 | -4.0780098 | -3.7283712 |
| C  | -3.1933297 | -3.9225208 | -2.6435453 |
| C  | -4.6574414 | -5.3294723 | -4.0074959 |
| C  | -2.8848535 | -5.0410943 | -1.8298293 |
| O  | -1.6322286 | -2.2499565 | -1.7633116 |
| H  | -4.7835816 | -7.4176855 | -3.4126153 |
| H  | -4.3353432 | -3.2065713 | -4.3578900 |
| H  | -3.2269972 | -7.1465127 | -1.4643248 |
| H  | -5.3477556 | -5.4448764 | -4.8563032 |
| H  | -2.2329040 | -4.9198934 | -0.9519695 |
| Br | -1.6834143 | -3.9669951 | 1.4396495  |
| Zn | -0.4434042 | -2.7812092 | -0.1784104 |
| H  | -5.9258380 | -3.0323248 | -2.1043750 |
| C  | -4.6655167 | -2.0438268 | -0.6006262 |
| C  | -5.9713509 | -2.2687102 | -1.2933062 |
| C  | -4.3189690 | -0.7205599 | -0.7039680 |
| C  | -3.1686813 | 0.0301513  | -0.2372096 |
| C  | -5.3818533 | -0.0622841 | -1.5349387 |
| O  | -6.3241473 | -1.0040578 | -1.8743978 |
| O  | -5.4695947 | 1.0982065  | -1.8852318 |
| H  | -6.7812796 | -2.5814370 | -0.5955349 |
| H  | -4.1442271 | -2.8104000 | -0.0092754 |
| H  | -3.0211918 | -1.8090261 | -3.1529396 |
| H  | -2.6025131 | -0.4730169 | 0.5689809  |
| H  | -3.4297242 | 1.0660477  | 0.0565647  |

|   |            |            |            |
|---|------------|------------|------------|
| C | 4.7613932  | 6.1596691  | 1.7091963  |
| C | 5.5161761  | 4.9781332  | 1.4853230  |
| H | 2.7807247  | 6.9936865  | 1.9705936  |
| H | 5.2690330  | 7.1346290  | 1.7639585  |
| H | 5.4885020  | 2.8382888  | 1.2380102  |
| H | 6.6067545  | 5.0429446  | 1.3510862  |
| C | 5.9297317  | 1.0393585  | 4.3884953  |
| C | 6.6777549  | -0.1368940 | 4.1189261  |
| H | 4.3214117  | 2.3369279  | 3.7697572  |
| H | 6.1678433  | 1.6478304  | 5.2741366  |
| H | 7.5027231  | -0.4288212 | 4.7862890  |
| H | 6.8988346  | -1.8612694 | 2.8295556  |
| C | -1.4754564 | 3.9768406  | 0.2265194  |
| C | -0.8879675 | 3.4982108  | 1.4364165  |
| C | -2.8694539 | 3.8834124  | 0.0757548  |
| C | -1.7082295 | 2.9237795  | 2.4432216  |
| C | -3.1008258 | 2.8646623  | 2.2412971  |
| C | -3.7069103 | 3.3356010  | 1.0656661  |
| H | -3.3295853 | 4.2299860  | -0.8633053 |
| C | -1.1318494 | 2.3811000  | 3.7496316  |
| H | -3.7266582 | 2.4174008  | 3.0277508  |
| C | -1.4645973 | 0.8913271  | 3.9520956  |
| H | -2.5573918 | 0.7264743  | 4.0537870  |
| H | -0.9849634 | 0.5073210  | 4.8761859  |
| H | -1.1028545 | 0.2809215  | 3.1017245  |
| C | -1.5862317 | 3.2320030  | 4.9501966  |
| H | -0.0272997 | 2.4671376  | 3.6947744  |
| H | -2.6878313 | 3.1916634  | 5.0807096  |
| H | -1.3045047 | 4.2963763  | 4.8181455  |
| H | -1.1235004 | 2.8667199  | 5.8905470  |
| C | -5.2119256 | 3.2808136  | 0.8232594  |
| C | -5.9377112 | 2.1974080  | 1.6306792  |
| H | -6.9947223 | 2.1220119  | 1.3052763  |
| H | -5.9445332 | 2.4227344  | 2.7181979  |
| H | -5.4686280 | 1.2023037  | 1.4924331  |
| C | -5.8437431 | 4.6660015  | 1.0645671  |
| H | -5.3445019 | 3.0267824  | -0.2514704 |
| H | -6.9260717 | 4.6564093  | 0.8196733  |
| H | -5.3592508 | 5.4464094  | 0.4439709  |
| H | -5.7343719 | 4.9680755  | 2.1276731  |
| C | -0.6465101 | 4.5907096  | -0.9034914 |
| C | -1.0432004 | 4.0829440  | -2.3000194 |
| H | -0.3485498 | 4.4877471  | -3.0641494 |
| H | -2.0647249 | 4.4032762  | -2.5906521 |
| H | -0.9979841 | 2.9802263  | -2.3630677 |
| C | -0.7204560 | 6.1300756  | -0.8546124 |
| H | 0.4103109  | 4.2954654  | -0.7403976 |
| H | -0.0833893 | 6.5812403  | -1.6434216 |
| H | -0.3901809 | 6.5331187  | 0.1232999  |
| H | -1.7622237 | 6.4767433  | -1.0193617 |
| H | -0.5173488 | -4.8430918 | -2.4091691 |
| H | 4.4462755  | -2.0784212 | -4.2298167 |
| H | 2.5107478  | -5.3749891 | 2.8147180  |
| C | 0.3794541  | -4.5999052 | -3.0180654 |
| H | 3.3974586  | 0.9947937  | -3.9068819 |
| H | -0.8858563 | -4.5871861 | -4.7915263 |
| H | 2.2023609  | -2.9877267 | 3.5423012  |
| C | 1.2532504  | -3.6921007 | -2.1643748 |
| C | 4.8276271  | -1.4070072 | -3.4322503 |
| C | -0.1039984 | -3.9564300 | -4.3237263 |
| H | 0.7212665  | -3.8602149 | -5.0596339 |
| C | 1.9815266  | -2.6307301 | -2.7112114 |
| C | 2.1827833  | -5.1056879 | 1.7910229  |
| H | 1.4103527  | -6.4365307 | -2.3518350 |
| C | 1.4308183  | -3.9739317 | -0.7771362 |
| C | 1.1072543  | -5.9320120 | -3.2911638 |
| H | 0.4486741  | -6.6244926 | -3.8540954 |
| H | 0.9905133  | -4.9013505 | -0.3755907 |
| C | 2.8004848  | 0.1350149  | -3.5417114 |
| H | 5.4468383  | -0.6246283 | -3.9169206 |
| H | 5.4855783  | -2.0066570 | -2.7711670 |

## int2-8-r-transmetall

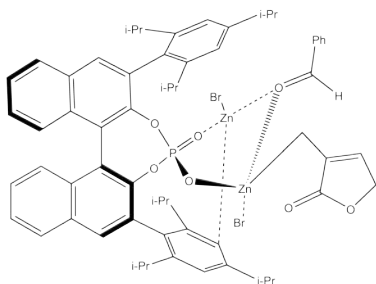

Energy(Hartree)= -11970.01915614

|   |            |            |            |
|---|------------|------------|------------|
| C | 1.3851815  | 2.3711940  | 1.5362011  |
| C | 2.7878510  | 2.3500482  | 1.5516883  |
| C | 3.4774739  | 3.6186739  | 1.5886714  |
| C | 4.8905956  | 3.7405871  | 1.4248157  |
| C | 2.7061287  | 4.8278964  | 1.7527291  |
| C | 3.3828066  | 6.0820692  | 1.8312322  |
| C | 1.2838265  | 4.7610454  | 1.7758641  |
| H | 0.7110560  | 5.6945460  | 1.8815442  |
| C | 0.5996103  | 3.5632978  | 1.6074404  |
| C | 3.7515222  | -1.1650741 | 0.3291295  |
| C | 4.8573997  | -1.4529303 | 1.1170527  |
| H | 5.3932957  | -2.4053204 | 0.9852132  |
| C | 5.2748943  | -0.5726070 | 2.1587278  |
| C | 6.3486723  | -0.9281841 | 3.0290599  |
| C | 4.5555088  | 0.6590022  | 2.3945389  |
| C | 4.8956466  | 1.4271826  | 3.5476638  |
| C | 3.5131152  | 1.0486330  | 1.4735160  |
| C | 3.1523340  | 0.1271775  | 0.4869112  |
| O | 0.6833499  | 1.1693719  | 1.4833108  |
| O | 2.1667589  | 0.4666319  | -0.4246779 |
| P | 0.5931892  | 0.3799528  | 0.0481179  |
| O | -0.1799556 | 1.1072630  | -1.0459149 |
| O | 0.1642497  | -1.0397830 | 0.4292378  |



|    |            |            |            |    |            |            |            |
|----|------------|------------|------------|----|------------|------------|------------|
| C  | 2.8669878  | -1.8532590 | -1.9403278 | Zn | -2.2627218 | 0.1507690  | 0.9062783  |
| C  | 1.8909620  | -2.7036371 | 2.5170487  | C  | -2.3240662 | 1.8948262  | 4.2912695  |
| C  | 2.3417455  | -3.2388105 | 0.0348829  | C  | -1.4447282 | 2.9422929  | 4.8852042  |
| H  | 2.6620339  | -5.8148530 | 1.0855270  | C  | -1.5622764 | 0.9631173  | 3.6370826  |
| H  | 1.0840000  | -5.2566716 | 1.7563007  | C  | -1.8955107 | -0.2302104 | 2.8524337  |
| C  | 3.6685437  | -0.7637535 | -2.6435721 | C  | -0.1624883 | 1.4108807  | 3.8184027  |
| C  | 3.0288415  | -2.1345877 | -0.5547999 | O  | -0.1038322 | 2.5491257  | 4.5324297  |
| C  | 2.5650607  | -3.6467839 | 1.4965640  | O  | 0.8747987  | 0.8606672  | 3.4119049  |
| H  | 1.9221690  | 0.5328491  | -2.9980000 | H  | -1.5007401 | 3.0130489  | 5.9940996  |
| H  | 2.1587540  | -1.6429594 | 2.3603752  | H  | -2.8194184 | -0.7179820 | 3.2199764  |
| H  | 2.4279636  | -0.4041543 | -4.4371562 | H  | -3.4190887 | 1.9066437  | 4.3795727  |
| H  | -0.5279430 | -2.9451119 | -4.1631968 | C  | -3.0416354 | 5.1398733  | 1.1649265  |
| H  | 0.7875947  | -2.7827022 | 2.4629040  | C  | -1.9191456 | 4.3205162  | 1.2962174  |
| H  | 2.0229421  | -5.7617033 | -3.8946609 | C  | -0.6670252 | 4.7561245  | 0.7968025  |
| H  | 4.1251702  | -0.1224525 | -1.8641004 | C  | -0.5523487 | 6.0196025  | 0.1746909  |
| H  | 3.6585595  | -3.5624646 | 1.6609533  | C  | -1.6813093 | 6.8381107  | 0.0452602  |
| H  | 1.8673794  | -2.3953515 | -3.7776169 | C  | -2.9227304 | 6.3966955  | 0.5372094  |
| Zn | -1.8825017 | 0.3136561  | -1.7940297 | H  | -4.0197961 | 4.7997954  | 1.5364231  |
| Br | -1.8055493 | 0.3848766  | -4.1275755 | H  | -1.9887190 | 3.3260425  | 1.7633320  |
| C  | -4.2641268 | -6.4709552 | -3.2179850 | C  | 0.5041199  | 3.8930138  | 0.8966272  |
| C  | -2.6844764 | -2.5809768 | -2.3972472 | H  | 0.4263168  | 6.3495716  | -0.2071166 |
| C  | -3.4176770 | -6.3070199 | -2.1044550 | H  | -1.5982162 | 7.8206852  | -0.4424181 |
| C  | -4.0851602 | -4.0989030 | -3.7037192 | H  | -3.8114520 | 7.0371688  | 0.4281130  |
| C  | -3.2150704 | -3.9281668 | -2.5958990 | O  | 0.4618876  | 2.7813836  | 1.4477319  |
| C  | -4.5988239 | -5.3639279 | -4.0159202 | C  | 0.3932914  | -2.9357044 | -0.5817238 |
| C  | -2.8910483 | -5.0499633 | -1.7938139 | C  | 0.5434333  | -3.1158697 | -1.9624570 |
| O  | -1.6713179 | -2.2228328 | -1.7219695 | C  | 1.2254469  | -4.3069628 | -2.4133876 |
| H  | -4.6701846 | -7.4654163 | -3.4586750 | C  | 1.5974602  | -4.5152067 | -3.7763600 |
| H  | -4.3364773 | -3.2267711 | -4.3282737 | C  | 1.5804613  | -5.3212021 | -1.4492540 |
| H  | -3.1709691 | -7.1697536 | -1.4672035 | C  | 2.2258227  | -6.5141255 | -1.8942900 |
| H  | -5.2634219 | -5.4871079 | -4.8841462 | C  | 1.3018291  | -5.1077456 | -0.0688232 |
| H  | -2.2660835 | -4.9224289 | -0.8970128 | H  | 1.5419077  | -5.9039829 | 0.6523878  |
| Br | -1.6532016 | -4.0225766 | 1.4584402  | C  | 0.7499213  | -3.9188313 | 0.3909101  |
| Zn | -0.4774509 | -2.7777990 | -0.1543867 | C  | 0.1499863  | 0.2682843  | -3.7431658 |
| H  | -5.8801628 | -3.0663368 | -2.1181578 | C  | -0.6114468 | -0.0916849 | -4.8489578 |
| C  | -4.5909714 | -2.0669644 | -0.6412582 | H  | -0.8366143 | 0.6616404  | -5.6187161 |
| C  | -5.9103282 | -2.2990387 | -1.3099374 | C  | -1.1456641 | -1.4048967 | -4.9985063 |
| C  | -4.2859619 | -0.7243307 | -0.7100630 | C  | -2.0024767 | -1.7292822 | -6.0932690 |
| C  | -3.1639355 | 0.0404526  | -0.2333095 | C  | -0.8414269 | -2.4219077 | -4.0190685 |
| C  | -5.3683408 | -0.0766152 | -1.5333288 | C  | -1.4589098 | -3.7010003 | -4.1556940 |
| O  | -6.2843474 | -1.0404061 | -1.8855165 | C  | 0.0453560  | -2.0942905 | -2.9291019 |
| O  | -5.4838908 | 1.0859263  | -1.8561088 | C  | 0.4461573  | -0.7629092 | -2.8015571 |
| H  | -6.7015090 | -2.6149298 | -0.5911483 | O  | -0.2074587 | -1.7770543 | -0.0987669 |
| H  | -4.0755633 | -2.8163617 | -0.0231421 | O  | 1.2381850  | -0.4070200 | -1.7157250 |
| H  | -3.0925155 | -1.8102136 | -3.0914227 | P  | 0.5219259  | -0.3020246 | -0.2507730 |
| H  | -2.5969038 | -0.4260465 | 0.5928923  | O  | 1.7003137  | -0.1256861 | 0.7147208  |
| H  | -3.4122915 | 1.0979878  | -0.0189228 | O  | -0.6437477 | 0.6906650  | -0.1993005 |
|    |            |            |            | C  | 2.5470258  | -6.6957706 | -3.2310229 |
|    |            |            |            | C  | 2.2426692  | -5.6781845 | -4.1743120 |
|    |            |            |            | H  | 2.4781499  | -7.2835675 | -1.1477287 |
|    |            |            |            | H  | 3.0509217  | -7.6173645 | -3.5600394 |
|    |            |            |            | H  | 1.3786713  | -3.7339809 | -4.5172255 |
|    |            |            |            | H  | 2.5255003  | -5.8090135 | -5.2300305 |
|    |            |            |            | C  | -2.3028416 | -3.9778640 | -5.2226989 |
|    |            |            |            | C  | -2.5676609 | -2.9905748 | -6.2091435 |
|    |            |            |            | H  | -1.2692706 | -4.4703391 | -3.3940440 |
|    |            |            |            | H  | -2.7752282 | -4.9690187 | -5.3005893 |
|    |            |            |            | H  | -3.2330100 | -3.2236501 | -7.0544100 |
|    |            |            |            | H  | -2.2196264 | -0.9482947 | -6.8389219 |
|    |            |            |            | C  | 1.4651571  | -3.1389835 | 2.6981900  |
|    |            |            |            | C  | 0.4623258  | -3.6768076 | 1.8421790  |
|    |            |            |            | C  | 1.1470071  | -2.9311350 | 4.0507446  |
|    |            |            |            | C  | -0.8284200 | -3.9737276 | 2.3502664  |
|    |            |            |            | C  | -1.0955120 | -3.7404946 | 3.7147379  |
|    |            |            |            | C  | -0.1235571 | -3.2216429 | 4.5839764  |
|    |            |            |            | H  | 1.9138630  | -2.5167741 | 4.7236401  |
|    |            |            |            | C  | -1.9400239 | -4.5175549 | 1.4539231  |
|    |            |            |            | H  | -2.1013327 | -3.9667676 | 4.0989479  |
|    |            |            |            | C  | -3.0610606 | -3.4819137 | 1.2557207  |
|    |            |            |            | H  | -3.5543708 | -3.2256917 | 2.2167763  |
|    |            |            |            | H  | -3.8416607 | -3.8644635 | 0.5666096  |

### 7.2.3.2 to 15d-ma and 15d-2-ma

#### TS1-8-d; COSMO

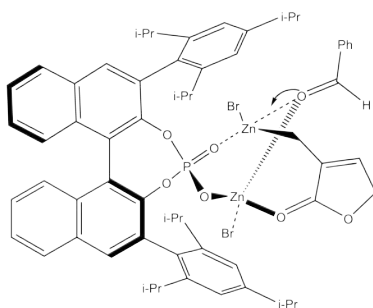

Energy(Hartree)= -11970.03983149

|    |            |            |            |
|----|------------|------------|------------|
| Zn | 2.0251166  | 1.4424576  | 1.8370643  |
| Br | 3.9950120  | 2.6510354  | 1.7624820  |
| H  | -1.6185491 | 3.9632546  | 4.4756738  |
| Br | -4.1881771 | 0.1520553  | -0.4103958 |
| H  | -1.0635748 | -0.9627590 | 2.8723483  |

|   |            |            |            |
|---|------------|------------|------------|
| H | -2.6695503 | -2.5424997 | 0.8181671  |
| C | -2.4937937 | -5.8568487 | 1.9711663  |
| H | -1.4981478 | -4.7143681 | 0.4557461  |
| H | -2.9918127 | -5.7425164 | 2.9566845  |
| H | -1.6861560 | -6.6079941 | 2.0876677  |
| H | -3.2460488 | -6.2663931 | 1.2658109  |
| C | -0.4035569 | -2.9088432 | 6.0513674  |
| C | -0.6300466 | -1.3949999 | 6.2428210  |
| H | -0.7407443 | -1.1412803 | 7.3176828  |
| H | -1.5501043 | -1.0700885 | 5.7143121  |
| H | 0.2149822  | -0.8062549 | 5.8324649  |
| C | -1.5602972 | -3.7140230 | 6.6563256  |
| H | 0.5216896  | -3.1758603 | 6.6104271  |
| H | -1.6338416 | -3.5270681 | 7.7468341  |
| H | -1.4275209 | -4.8041097 | 6.5027150  |
| H | -2.5355566 | -3.4253606 | 6.2109811  |
| C | 2.8630227  | -2.8082422 | 2.1756738  |
| C | 3.5210111  | -1.6240260 | 2.9025408  |
| H | 4.3855458  | -1.2428680 | 2.3233924  |
| H | 3.8962295  | -1.9091663 | 3.9076783  |
| H | 2.8054756  | -0.7920488 | 3.0418940  |
| C | 3.7880291  | -4.0401203 | 2.2288266  |
| H | 2.7468772  | -2.5132005 | 1.1118625  |
| H | 4.7961328  | -3.7890599 | 1.8384554  |
| H | 3.3924363  | -4.8817729 | 1.6283531  |
| H | 3.9047336  | -4.3949377 | 3.2744374  |
| H | 1.2606158  | 6.2939418  | -2.3561994 |
| H | 4.3530888  | 2.0637888  | -5.1256013 |
| H | -3.5532035 | 2.8097341  | -4.4156037 |
| C | 2.1192219  | 5.7077807  | -2.7541574 |
| H | 4.7963633  | -0.1456995 | -2.8277485 |
| H | 3.5236620  | 6.8365212  | -1.5041510 |
| H | -3.4875062 | 2.8168288  | -1.8451151 |
| C | 1.6129353  | 4.2883329  | -2.9806398 |
| C | 3.7927039  | 1.1053619  | -5.1374537 |
| C | 3.2616520  | 5.7818508  | -1.7268076 |
| H | 4.1808750  | 5.2881365  | -2.1039515 |
| C | 2.4993242  | 3.2298582  | -3.2420409 |
| C | -2.4630460 | 3.0154367  | -4.4416181 |
| H | 1.6964430  | 6.3520966  | -4.8154155 |
| C | 0.2377907  | 4.0015290  | -2.9730455 |
| C | 2.5334073  | 6.3578854  | -4.0884823 |
| H | 2.8552992  | 7.4094289  | -3.9375693 |
| H | -0.4698374 | 4.8186472  | -2.7585378 |
| C | 4.1146073  | 0.7095896  | -2.6406641 |
| H | 4.5163045  | 0.2959184  | -5.3675197 |
| H | 3.0577635  | 1.1558131  | -5.9665752 |
| C | 2.0515274  | 1.9222408  | -3.4970258 |
| C | -2.4192070 | 3.1024933  | -1.9118761 |
| C | -0.2683595 | 2.7089891  | -3.2177618 |
| H | -2.0487673 | 2.5499043  | -5.3584619 |
| H | -2.3262934 | 4.1134859  | -4.5377215 |
| C | 3.0963314  | 0.8460346  | -3.7880189 |
| C | 0.6509549  | 1.6580711  | -3.4979778 |
| C | -1.7799478 | 2.4877566  | -3.1656851 |
| H | 3.6067739  | 0.5415553  | -1.6711609 |
| H | -1.9213208 | 2.7205922  | -1.0019892 |
| H | 4.7438751  | 1.6185030  | -2.5410371 |
| H | 2.9989174  | 5.2823485  | -0.7714808 |
| H | -2.3604178 | 4.2110812  | -1.9066738 |
| H | 3.3805162  | 5.8056959  | -4.5467683 |
| H | 2.5726988  | -0.1260750 | -3.8824131 |
| H | -1.9596214 | 1.3951676  | -3.1053826 |
| H | 3.5828858  | 3.4254844  | -3.2508227 |
| H | 1.4656543  | 4.2610840  | 0.4587714  |

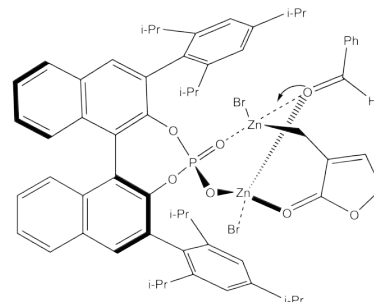

Energy(Hartree)= -11970.02614047  
number of imaginary frequencies: 1

|    |            |            |            |
|----|------------|------------|------------|
| Zn | 2.0447040  | 1.4051628  | 1.8634337  |
| Br | 3.9906173  | 2.6368095  | 1.8021129  |
| H  | -1.6483034 | 3.9504692  | 4.4141898  |
| Br | -4.2082393 | 0.1340261  | -0.4089735 |
| H  | -1.0880561 | -0.9939754 | 2.8757108  |
| Zn | -2.2952551 | 0.1175755  | 0.9036393  |
| C  | -2.3590967 | 1.8792721  | 4.2605336  |
| C  | -1.4785403 | 2.9352188  | 4.8411108  |
| C  | -1.5963285 | 0.9358292  | 3.6233217  |
| C  | -1.9228604 | -0.2652940 | 2.8532923  |
| C  | -0.1944181 | 1.3851424  | 3.8043960  |
| O  | -0.1386207 | 2.5361338  | 4.5013477  |
| O  | 0.8408482  | 0.8282647  | 3.4103133  |
| H  | -1.5379328 | 3.0244714  | 5.9492024  |
| H  | -2.8485665 | -0.7524329 | 3.2165716  |
| H  | -3.4544711 | 1.8919575  | 4.3430756  |
| C  | -2.9247226 | 5.2534630  | 1.1345685  |
| C  | -1.8360422 | 4.3904007  | 1.2734097  |
| C  | -0.5616290 | 4.7835032  | 0.7975777  |
| C  | -0.3906098 | 6.0471283  | 0.1906344  |
| C  | -1.4855244 | 6.9097152  | 0.0545968  |
| C  | -2.7496150 | 6.5112337  | 0.5236654  |
| H  | -3.9208654 | 4.9441042  | 1.4846417  |
| H  | -1.9502934 | 3.3927236  | 1.7244962  |
| H  | 0.5765608  | 3.8744286  | 0.9093511  |
| H  | 0.6049364  | 6.3406939  | -0.1764851 |
| H  | -1.3579373 | 7.8929583  | -0.4222005 |
| H  | -3.6119412 | 7.1858046  | 0.4079200  |
| O  | 0.4829474  | 2.7649031  | 1.4539516  |
| C  | 0.3961338  | -2.9458054 | -0.5739050 |
| C  | 0.5546694  | -3.1187308 | -1.9544340 |
| C  | 1.2475873  | -4.3024485 | -2.4073467 |
| C  | 1.6265727  | -4.5019726 | -3.7693758 |
| C  | 1.6055756  | -5.3181958 | -1.4461802 |
| C  | 2.2618448  | -6.5034553 | -1.8941027 |
| C  | 1.3182294  | -5.1126907 | -0.0665753 |
| H  | 1.5598098  | -5.9095988 | 0.6534191  |
| C  | 0.7555838  | -3.9302523 | 0.3963310  |
| C  | 0.1369384  | 0.2707196  | -3.7185673 |
| C  | -0.6202292 | -0.0904653 | -4.8266537 |
| H  | -0.8503161 | 0.6662097  | -5.5916087 |
| C  | -1.1421774 | -1.4069919 | -4.9850197 |
| C  | -1.9934718 | -1.7338099 | -6.0826492 |
| C  | -0.8294257 | -2.4262547 | -4.0110422 |
| C  | -1.4333039 | -3.7105913 | -4.1566966 |
| C  | 0.0519256  | -2.0962076 | -2.9175303 |
| C  | 0.4409411  | -0.7618940 | -2.7813813 |
| O  | -0.2154671 | -1.7936789 | -0.0903320 |
| O  | 1.2287139  | -0.4043960 | -1.6933232 |
| P  | 0.5123567  | -0.3162964 | -0.2264627 |
| O  | 1.6905484  | -0.1548900 | 0.7414369  |
| O  | -0.6531763 | 0.6750886  | -0.1648220 |
| C  | 2.5900985  | -6.6768613 | -3.2296569 |
| C  | 2.2817644  | -5.6580679 | -4.1694552 |

TS1-8-d

|   |            |            |            |
|---|------------|------------|------------|
| H | 2.5172617  | -7.2740539 | -1.1497980 |
| H | 3.1026389  | -7.5930509 | -3.5602251 |
| H | 1.4034919  | -3.7188871 | -4.5068776 |
| H | 2.5694730  | -5.7822551 | -5.2245984 |
| C | -2.2714261 | -3.9896391 | -5.2270457 |
| C | -2.5448332 | -2.9996636 | -6.2075517 |
| H | -1.2367407 | -4.4817709 | -3.3988706 |
| H | -2.7331832 | -4.9851671 | -5.3117172 |
| H | -3.2064952 | -3.2342200 | -7.0552186 |
| H | -2.2180721 | -0.9501169 | -6.8231884 |
| C | 1.4557214  | -3.1586911 | 2.7108077  |
| C | 0.4594092  | -3.6960152 | 1.8470426  |
| C | 1.1279507  | -2.9553444 | 4.0613788  |
| C | -0.8333792 | -3.9985366 | 2.3461229  |
| C | -1.1097666 | -3.7690803 | 3.7091596  |
| C | -0.1451964 | -3.2492792 | 4.5854119  |
| H | 1.8898127  | -2.5413044 | 4.7400217  |
| C | -1.9374016 | -4.5450781 | 1.4419531  |
| H | -2.1171392 | -4.0000925 | 4.0862602  |
| C | -3.0613077 | -3.5141526 | 1.2363453  |
| H | -3.5629212 | -3.2601566 | 2.1936389  |
| H | -3.8363333 | -3.8980197 | 0.5420039  |
| H | -2.6723953 | -2.5727376 | 0.8012234  |
| C | -2.4889048 | -5.8869650 | 1.9546412  |
| H | -1.4877613 | -4.7397537 | 0.4467908  |
| H | -2.9950453 | -5.7757666 | 2.9362841  |
| H | -1.6790912 | -6.6343926 | 2.0781606  |
| H | -3.2341414 | -6.3002009 | 1.2441027  |
| C | -0.4348315 | -2.9388851 | 6.0514917  |
| C | -0.6514860 | -1.4240850 | 6.2467860  |
| H | -0.7677724 | -1.1725986 | 7.3216403  |
| H | -1.5655675 | -1.0907495 | 5.7131866  |
| H | 0.2002678  | -0.8399628 | 5.8438581  |
| C | -1.6017552 | -3.7374486 | 6.6450011  |
| H | 0.4838629  | -3.2152892 | 6.6170046  |
| H | -1.6835290 | -3.5539908 | 7.7354734  |
| H | -1.4759383 | -4.8277628 | 6.4886070  |
| H | -2.5713486 | -3.4402456 | 6.1930658  |
| C | 2.8560376  | -2.8217250 | 2.1988033  |
| C | 3.5067399  | -1.6399448 | 2.9361892  |
| H | 4.3715211  | -1.2497028 | 2.3637888  |
| H | 3.8802377  | -1.9299567 | 3.9405882  |
| H | 2.7872365  | -0.8122102 | 3.0810727  |
| C | 3.7845075  | -4.0508326 | 2.2512370  |
| H | 2.7460543  | -2.5210836 | 1.1360234  |
| H | 4.7945288  | -3.7942649 | 1.8698611  |
| H | 3.3967399  | -4.8896143 | 1.6420698  |
| H | 3.8945456  | -4.4124899 | 3.2951019  |
| H | 1.2022026  | 6.3243044  | -2.4234529 |
| H | 4.3234638  | 2.0800476  | -5.1253961 |
| H | -3.6074426 | 2.7610442  | -4.3310922 |
| C | 2.0625498  | 5.7398899  | -2.8210195 |
| H | 4.7880685  | -0.0997669 | -2.8024859 |
| H | 3.4734778  | 6.9168804  | -1.6215778 |
| H | -3.4883905 | 2.7936842  | -1.7620122 |
| C | 1.5700847  | 4.3096106  | -3.0064456 |
| C | 3.7692946  | 1.1180356  | -5.1241411 |
| C | 3.2202969  | 5.8541688  | -1.8149124 |
| H | 4.1401479  | 5.3639351  | -2.1945335 |
| C | 2.4642472  | 3.2551406  | -3.2556287 |
| C | -2.5208534 | 2.9791844  | -4.3825051 |
| H | 1.5977201  | 6.3274156  | -4.8895352 |
| C | 0.1983349  | 4.0095865  | -2.9779853 |
| C | 2.4460854  | 6.3629177  | -4.1771884 |
| H | 2.7571357  | 7.4219184  | -4.0587987 |
| H | -0.5151048 | 4.8229908  | -2.7682599 |
| C | 4.0993524  | 0.7513842  | -2.6231310 |
| H | 4.4979310  | 0.3114127  | -5.3477534 |
| H | 3.0319471  | 1.1550109  | -5.9516023 |
| C | 2.0265491  | 1.9399556  | -3.4878597 |
| C | -2.4258867 | 3.0926192  | -1.8559669 |

|   |            |            |            |
|---|------------|------------|------------|
| C | -0.2977802 | 2.7089658  | -3.1975364 |
| H | -2.1210150 | 2.5090840  | -5.3032396 |
| H | -2.3985580 | 4.0774735  | -4.4935800 |
| C | 3.0785399  | 0.8686129  | -3.7701490 |
| C | 0.6285996  | 1.6641516  | -3.4756283 |
| C | -1.8056812 | 2.4717724  | -3.1163925 |
| H | 3.5956964  | 0.5870839  | -1.6509536 |
| H | -1.9029047 | 2.7253988  | -0.9538546 |
| H | 4.7215734  | 1.6658475  | -2.5311498 |
| H | 2.9821837  | 5.3728263  | -0.8439633 |
| H | -2.3796787 | 4.2019932  | -1.8639602 |
| H | 3.2916922  | 5.8098357  | -4.6366683 |
| H | 2.5615521  | -0.1079746 | -3.8530891 |
| H | -1.9738290 | 1.3782531  | -3.0412097 |
| H | 3.5459997  | 3.4595888  | -3.2759687 |
| H | 1.5604741  | 4.2054699  | 0.4902448  |

### TS2-8-d; COSMO

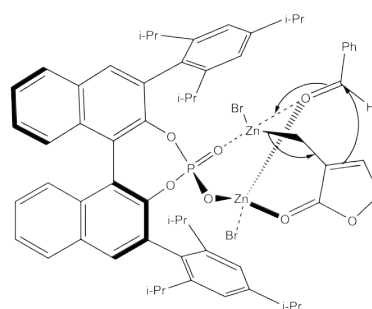

Energy(Hartree)= -11970.02605801

|    |            |            |            |
|----|------------|------------|------------|
| Zn | 2.1505513  | 1.4819383  | 0.6947578  |
| Br | 4.3758265  | 1.5967707  | 0.1170342  |
| H  | 2.3554385  | 6.2683548  | 1.2705738  |
| Br | -2.6830964 | 3.9525632  | -1.0696850 |
| H  | -0.7547197 | 2.0791123  | 2.4657710  |
| Zn | -1.0185776 | 2.5137049  | -0.2710666 |
| C  | 0.4351301  | 5.1393496  | 1.2217297  |
| C  | 1.6100891  | 5.7697932  | 1.9222883  |
| C  | 0.1843808  | 3.9177510  | 1.8917983  |
| C  | -0.8794305 | 3.0112920  | 1.8880097  |
| C  | 1.5276278  | 3.5533511  | 2.4318215  |
| O  | 2.2914348  | 4.6512691  | 2.5554701  |
| O  | 1.9746923  | 2.4200907  | 2.6421756  |
| H  | 1.3047939  | 6.4912124  | 2.7111356  |
| H  | -1.9029672 | 3.4123694  | 1.8008032  |
| H  | -0.3414139 | 5.7443183  | 0.7307648  |
| C  | 0.0682140  | 5.2199062  | -3.8463623 |
| C  | 0.3277562  | 4.4334176  | -2.7172832 |
| C  | 1.0913801  | 4.9504286  | -1.6462933 |
| C  | 1.6041108  | 6.2660760  | -1.7420380 |
| C  | 1.3371860  | 7.0520228  | -2.8682727 |
| C  | 0.5629353  | 6.5322295  | -3.9227482 |
| H  | -0.5242662 | 4.8012927  | -4.6741665 |
| H  | -0.0257587 | 3.3935150  | -2.6855067 |
| C  | 1.4254630  | 4.1072106  | -0.4815874 |
| H  | 2.2287250  | 6.6715474  | -0.9310359 |
| H  | 1.7418824  | 8.0734241  | -2.9318010 |
| H  | 0.3555357  | 7.1497324  | -4.8099623 |
| O  | 1.0271867  | 2.8482511  | -0.4599742 |
| C  | -1.1455859 | -2.4942202 | 1.4299996  |
| C  | -1.0744798 | -3.5961857 | 0.5694995  |
| C  | -0.7834695 | -4.8837249 | 1.1579911  |
| C  | -0.5134128 | -6.0509230 | 0.3811627  |
| C  | -0.7228769 | -4.9964841 | 2.5969042  |
| C  | -0.4797350 | -6.2730774 | 3.1884920  |
| C  | -0.8411730 | -3.8290082 | 3.4039065  |

|   |            |            |            |   |            |            |            |
|---|------------|------------|------------|---|------------|------------|------------|
| H | -0.7566220 | -3.9291674 | 4.4967781  | H | 4.0788714  | 3.8420213  | -3.9167319 |
| C | -0.9898733 | -2.5636243 | 2.8472352  | H | -3.5229926 | 1.2867948  | -3.9976819 |
| C | -0.4252145 | -2.2640909 | -2.9839254 | C | 1.9047995  | 1.1342982  | -4.3460236 |
| C | -1.2168082 | -3.1157261 | -3.7455711 | C | 3.3511972  | -3.0253766 | -3.9401187 |
| H | -1.2021691 | -3.0308868 | -4.8427423 | C | 3.6104019  | 2.8768368  | -3.6340609 |
| C | -2.0937980 | -4.0649637 | -3.1431547 | H | 4.4269919  | 2.1639450  | -3.3986655 |
| C | -2.9696374 | -4.8624487 | -3.9401870 | C | 2.5273956  | 0.0113033  | -3.7731328 |
| C | -2.1340002 | -4.1991659 | -1.7051331 | C | -2.0988690 | -0.2187367 | -5.8616911 |
| C | -3.1012470 | -5.0798099 | -1.1347385 | H | 2.8558795  | 1.7533639  | -6.8768367 |
| C | -1.2223302 | -3.4156456 | -0.9051269 | C | 0.5147145  | 1.0831844  | -4.5355942 |
| C | -0.4526985 | -2.4543963 | -1.5678236 | C | 3.5148120  | 2.0800479  | -6.0469868 |
| O | -1.4198238 | -1.2343862 | 0.9002988  | H | 4.0621497  | 2.9877696  | -6.3765054 |
| O | 0.3933360  | -1.6362113 | -0.8211801 | H | 0.0160548  | 1.9500370  | -4.9986321 |
| P | -0.2647559 | -0.4393688 | 0.0673376  | C | 3.4888581  | -1.9472990 | -1.6393167 |
| O | 0.8687033  | 0.0580102  | 0.9789808  | H | 3.8700528  | -3.9278240 | -3.5549511 |
| O | -1.0186729 | 0.6090582  | -0.7641521 | H | 2.6772773  | -3.3398300 | -4.7629418 |
| C | -0.2603414 | -7.3941792 | 2.4027104  | C | 1.8023613  | -1.1231022 | -3.3716446 |
| C | -0.2590043 | -7.2737498 | 0.9873813  | C | -2.4209353 | 1.3301267  | -3.8790566 |
| H | -0.4502479 | -6.3445123 | 4.2871609  | C | -0.2658390 | -0.0207789 | -4.1392558 |
| H | -0.0671205 | -8.3710096 | 2.8716131  | H | -1.6775775 | -1.1792449 | -6.2221094 |
| H | -0.4970061 | -5.9749865 | -0.7144141 | H | -1.6737354 | 0.5867484  | -6.4969242 |
| H | -0.0482100 | -8.1558859 | 0.3636880  | C | 2.5687962  | -2.3218551 | -2.8137987 |
| C | -3.9527395 | -5.8261054 | -1.9383275 | C | 0.3868985  | -1.1368065 | -3.5408977 |
| C | -3.8777480 | -5.7313385 | -3.3536308 | C | -1.7754108 | 0.0271040  | -4.3750065 |
| H | -3.1755050 | -5.1563971 | -0.0409823 | H | 2.9266203  | -1.4366680 | -0.8342988 |
| H | -4.6954855 | -6.4922836 | -1.4734207 | H | -2.2060318 | 1.5038649  | -2.8086806 |
| H | -4.5517290 | -6.3344247 | -3.9809074 | H | 4.3090345  | -1.2693553 | -1.9523536 |
| H | -2.9210449 | -4.7599205 | -5.0357381 | H | 3.0371296  | 3.0304387  | -2.6996911 |
| C | 0.3498249  | -0.9662855 | 4.2664487  | H | -2.0701516 | 2.2187548  | -4.4444297 |
| C | -0.8994998 | -1.3141511 | 3.6692065  | H | 4.2633512  | 1.2778832  | -5.8757631 |
| C | 0.4128202  | 0.1797094  | 5.0773057  | H | 1.8289160  | -3.0554840 | -2.4344060 |
| C | -2.0279993 | -0.4716284 | 3.8549353  | H | -2.2336763 | -0.7964118 | -3.7913778 |
| C | -1.9045941 | 0.6692131  | 4.6739026  | H | 3.6184602  | 0.0194674  | -3.6264514 |
| C | -0.7004336 | 1.0069756  | 5.3136376  | H | 2.4193849  | 4.3004333  | -0.0241960 |
| H | 1.3726625  | 0.4384278  | 5.5535209  |   |            |            |            |
| C | -3.3914017 | -0.7837371 | 3.2400466  |   |            |            |            |
| H | -2.7934268 | 1.2985790  | 4.8274530  |   |            |            |            |
| C | -3.8890393 | 0.3551943  | 2.3309249  |   |            |            |            |
| H | -4.0473550 | 1.2952630  | 2.8996224  |   |            |            |            |
| H | -4.8573697 | 0.0853943  | 1.8616206  |   |            |            |            |
| H | -3.1674972 | 0.5618109  | 1.5160633  |   |            |            |            |
| C | -4.4247626 | -1.1282811 | 4.3292677  |   |            |            |            |
| H | -3.2807393 | -1.6863564 | 2.6060914  |   |            |            |            |
| H | -4.6082825 | -0.2649236 | 5.0026668  |   |            |            |            |
| H | -4.0791906 | -1.9755511 | 4.9557507  |   |            |            |            |
| H | -5.3963662 | -1.4106685 | 3.8735004  |   |            |            |            |
| C | -0.5570939 | 2.2126637  | 6.2421076  |   |            |            |            |
| C | 0.3010531  | 3.3205245  | 5.5997373  |   |            |            |            |
| H | 0.4830449  | 4.1461035  | 6.3183402  |   |            |            |            |
| H | -0.2191020 | 3.7469751  | 4.7167521  |   |            |            |            |
| H | 1.2830397  | 2.9338592  | 5.2636451  |   |            |            |            |
| C | -1.8911032 | 2.7826825  | 6.7388868  |   |            |            |            |
| H | 0.0023057  | 1.8455891  | 7.1326985  |   |            |            |            |
| H | -1.7148610 | 3.5771106  | 7.4919319  |   |            |            |            |
| H | -2.5256262 | 2.0031625  | 7.2068483  |   |            |            |            |
| H | -2.4717554 | 3.2410153  | 5.9107536  |   |            |            |            |
| C | 1.6197520  | -1.7993907 | 4.0769728  |   |            |            |            |
| C | 2.8110427  | -0.9657883 | 3.5729703  |   |            |            |            |
| H | 3.7010540  | -1.6128037 | 3.4325756  |   |            |            |            |
| H | 3.0927497  | -0.1599684 | 4.2810823  |   |            |            |            |
| H | 2.5778763  | -0.4958926 | 2.6003872  |   |            |            |            |
| C | 1.9832474  | -2.5506839 | 5.3722818  |   |            |            |            |
| H | 1.4116651  | -2.5601147 | 3.2981452  |   |            |            |            |
| H | 2.8711904  | -3.1976479 | 5.2160515  |   |            |            |            |
| H | 1.1493482  | -3.1922251 | 5.7224910  |   |            |            |            |
| H | 2.2226819  | -1.8407583 | 6.1916674  |   |            |            |            |
| H | 1.9712381  | 3.1594423  | -4.9989065 |   |            |            |            |
| H | 4.1201899  | -2.3521711 | -4.3738479 |   |            |            |            |
| H | -3.1958131 | -0.2393340 | -6.0290374 |   |            |            |            |
| C | 2.7073457  | 2.3589559  | -4.7653630 |   |            |            |            |
| H | 3.9565150  | -2.8567425 | -1.2089917 |   |            |            |            |

### TS2-8-d

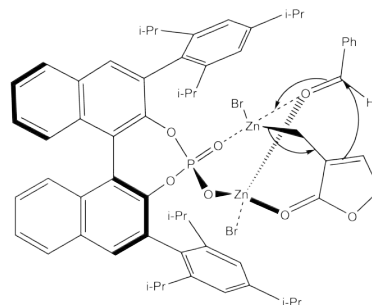

Energy(Hartree)= -11970.01371084  
number of imaginary frequencies: 1

|    |            |           |            |
|----|------------|-----------|------------|
| Zn | 2.1552212  | 1.4719825 | 0.6944899  |
| Br | 4.3655874  | 1.6328275 | 0.1008344  |
| H  | 2.3401822  | 6.2614359 | 1.2569005  |
| Br | -2.6601819 | 3.9867987 | -1.0743974 |
| H  | -0.7726124 | 2.0781956 | 2.4575380  |
| Zn | -1.0310865 | 2.5129171 | -0.2888388 |
| C  | 0.4203294  | 5.1351302 | 1.2079336  |
| C  | 1.5943977  | 5.7648476 | 1.9109388  |
| C  | 0.1666862  | 3.9163225 | 1.8817408  |
| C  | -0.8967222 | 3.0105593 | 1.8801374  |
| C  | 1.5078740  | 3.5512494 | 2.4279042  |
| O  | 2.2730537  | 4.6523903 | 2.5500003  |
| O  | 1.9512984  | 2.4206868 | 2.6461610  |
| H  | 1.2899412  | 6.4920887 | 2.6962797  |
| H  | -1.9204665 | 3.4068093 | 1.7788097  |
| H  | -0.3530085 | 5.7336939 | 0.7041240  |
| C  | 0.0855826  | 5.2403850 | -3.8521444 |
| C  | 0.3299145  | 4.4449989 | -2.7261931 |

|   |            |            |            |   |            |            |            |
|---|------------|------------|------------|---|------------|------------|------------|
| C | 1.1131377  | 4.9392323  | -1.6590096 | H | -1.7217869 | 3.5694387  | 7.4982412  |
| C | 1.6620866  | 6.2397723  | -1.7581596 | H | -2.5262468 | 1.9922042  | 7.2152056  |
| C | 1.4108803  | 7.0346074  | -2.8811877 | H | -2.4818455 | 3.2307835  | 5.9198782  |
| C | 0.6156166  | 6.5381278  | -3.9305803 | C | 1.6201855  | -1.7987736 | 4.0788872  |
| H | -0.5252808 | 4.8388249  | -4.6748487 | C | 2.8101707  | -0.9645072 | 3.5733293  |
| H | -0.0527946 | 3.4159203  | -2.6935133 | H | 3.7010756  | -1.6099362 | 3.4324477  |
| C | 1.4304005  | 4.0895938  | -0.4950542 | H | 3.0927274  | -0.1569526 | 4.2789439  |
| H | 2.3065283  | 6.6239686  | -0.9520296 | H | 2.5767341  | -0.4958068 | 2.6004783  |
| H | 1.8450298  | 8.0436663  | -2.9471240 | C | 1.9850624  | -2.5480464 | 5.3748632  |
| H | 0.4197751  | 7.1623817  | -4.8156537 | H | 1.4125201  | -2.5608270 | 3.3012203  |
| O | 1.0184709  | 2.8387889  | -0.4674186 | H | 2.8739389  | -3.1938558 | 5.2198216  |
| C | -1.1461998 | -2.4964225 | 1.4337050  | H | 1.1524490  | -3.1901539 | 5.7268261  |
| C | -1.0742284 | -3.5981760 | 0.5727101  | H | 2.2233029  | -1.8374727 | 6.1938773  |
| C | -0.7825075 | -4.8858003 | 1.1605297  | H | 1.9627006  | 3.1657510  | -5.0030111 |
| C | -0.5128583 | -6.0523675 | 0.3830017  | H | 4.1195643  | -2.3361925 | -4.3685720 |
| C | -0.7211953 | -4.9998081 | 2.5991182  | H | -3.2029420 | -0.2357866 | -6.0163786 |
| C | -0.4776826 | -6.2766578 | 3.1888141  | C | 2.6993163  | 2.3644625  | -4.7730861 |
| C | -0.8395890 | -3.8328684 | 3.4063103  | H | 3.9597085  | -2.8404631 | -1.2021011 |
| H | -0.7537180 | -3.9319959 | 4.4991723  | H | 4.0805640  | 3.8493143  | -3.9433565 |
| C | -0.9895150 | -2.5673851 | 2.8508968  | H | -3.5305152 | 1.2890595  | -3.9828244 |
| C | -0.4245856 | -2.2591958 | -2.9776097 | C | 1.8980792  | 1.1425551  | -4.3434331 |
| C | -1.2147389 | -3.1105737 | -3.7407133 | C | 3.3527773  | -3.0109163 | -3.9336796 |
| H | -1.1999008 | -3.0216421 | -4.8375434 | C | 3.6139886  | 2.8855938  | -3.6529653 |
| C | -2.0901122 | -4.0627796 | -3.1413355 | H | 4.4327339  | 2.1739210  | -3.4220424 |
| C | -2.9637963 | -4.8605446 | -3.9396127 | C | 2.5225641  | 0.0221168  | -3.7684742 |
| C | -2.1306809 | -4.2000915 | -1.7038292 | C | -2.1060082 | -0.2136223 | -5.8494467 |
| C | -3.0959916 | -5.0841747 | -1.1361049 | H | 2.8269199  | 1.7492216  | -6.8832808 |
| C | -1.2209760 | -3.4166474 | -0.9018576 | C | 0.5077735  | 1.0896217  | -4.5289752 |
| C | -0.4518512 | -2.4532436 | -1.5620169 | C | 3.4938573  | 2.0787786  | -6.0612137 |
| O | -1.4217443 | -1.2368231 | 0.9065121  | H | 4.0406490  | 2.9833873  | -6.3999280 |
| O | 0.3924941  | -1.6363878 | -0.8134476 | H | 0.0070291  | 1.9550180  | -4.9925525 |
| P | -0.2680695 | -0.4391823 | 0.0736001  | C | 3.4892136  | -1.9326477 | -1.6324803 |
| O | 0.8637641  | 0.0586873  | 0.9870357  | H | 3.8746355  | -3.9120442 | -3.5496219 |
| O | -1.0208477 | 0.6059072  | -0.7615400 | H | 2.6792388  | -3.3263415 | -4.7562114 |
| C | -0.2591360 | -7.3969535 | 2.4026068  | C | 1.8001080  | -1.1127700 | -3.3646213 |
| C | -0.2587761 | -7.2753636 | 0.9879746  | C | -2.4285002 | 1.3330789  | -3.8657555 |
| H | -0.4470275 | -6.3486642 | 4.2874097  | C | -0.2708019 | -0.0144038 | -4.1301055 |
| H | -0.0656560 | -8.3739984 | 2.8708322  | H | -1.6829453 | -1.1724697 | -6.2119745 |
| H | -0.4975171 | -5.9745000 | -0.7123465 | H | -1.6826475 | 0.5922433  | -6.4851718 |
| H | -0.0486684 | -8.1569059 | 0.3633043  | C | 2.5698008  | -2.3093702 | -2.8066752 |
| C | -3.9447252 | -5.8309509 | -1.9414051 | C | 0.3847456  | -1.1292095 | -3.5328096 |
| C | -3.8696033 | -5.7328863 | -3.3558813 | C | -1.7809775 | 0.0317203  | -4.3631214 |
| H | -3.1693515 | -5.1628022 | -0.0425366 | H | 2.9263231  | -1.4242627 | -0.8264558 |
| H | -4.6856784 | -6.5001471 | -1.4780939 | H | -2.2151659 | 1.5065495  | -2.7952394 |
| H | -4.5417298 | -6.3361064 | -3.9849268 | H | 4.3077052  | -1.2518825 | -1.9433040 |
| H | -2.9152030 | -4.7549423 | -5.0348585 | H | 3.0518165  | 3.0427839  | -2.7127274 |
| C | 0.3488995  | -0.9678292 | 4.2686324  | H | -2.0807116 | 2.2234699  | -4.4301967 |
| C | -0.9003384 | -1.3184564 | 3.6734929  | H | 4.2417071  | 1.2753578  | -5.8940652 |
| C | 0.4101965  | 0.1788929  | 5.0780967  | H | 1.8317335  | -3.0448289 | -2.4271715 |
| C | -2.0305464 | -0.4789341 | 3.8605577  | H | -2.2371598 | -0.7925895 | -3.7789971 |
| C | -1.9086287 | 0.6622537  | 4.6787065  | H | 3.6135597  | 0.0325058  | -3.6221135 |
| C | -0.7043816 | 1.0031971  | 5.3158739  | H | 2.4215415  | 4.2754393  | -0.0269524 |
| H | 1.3704378  | 0.4401399  | 5.5520223  |   |            |            |            |
| C | -3.3941116 | -0.7956024 | 3.2484027  |   |            |            |            |
| H | -2.7990847 | 1.2888573  | 4.8340371  |   |            |            |            |
| C | -3.8972466 | 0.3403129  | 2.3388676  |   |            |            |            |
| H | -4.0580446 | 1.2807669  | 2.9062807  |   |            |            |            |
| H | -4.8656588 | 0.0676220  | 1.8716679  |   |            |            |            |
| H | -3.1789055 | 0.5476185  | 1.5216591  |   |            |            |            |
| C | -4.4234842 | -1.1435279 | 4.3401141  |   |            |            |            |
| H | -3.2811293 | -1.6981138 | 2.6147131  |   |            |            |            |
| H | -4.6087170 | -0.2811728 | 5.0142002  |   |            |            |            |
| H | -4.0732111 | -1.9887046 | 4.9664847  |   |            |            |            |
| H | -5.3955139 | -1.4295688 | 3.8876506  |   |            |            |            |
| C | -0.5622435 | 2.2095797  | 6.2435811  |   |            |            |            |
| C | 0.2890836  | 3.3206769  | 5.5979809  |   |            |            |            |
| H | 0.4709822  | 4.1475887  | 6.3152280  |   |            |            |            |
| H | -0.2364232 | 3.7440299  | 4.7166235  |   |            |            |            |
| H | 1.2708375  | 2.9381660  | 5.2568338  |   |            |            |            |
| C | -1.8964176 | 2.7743064  | 6.7456035  |   |            |            |            |
| H | 0.0012526  | 1.8444671  | 7.1325153  |   |            |            |            |

### TS2-8-d-transmetall; COSMO

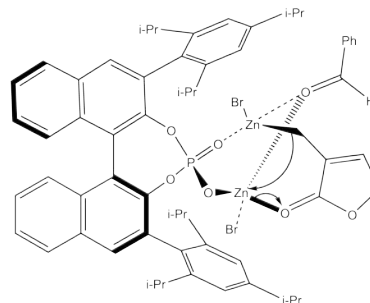

Energy(Hartree)= -11970.02704781

|    |            |           |            |
|----|------------|-----------|------------|
| Zn | 2.0469601  | 1.9130017 | 1.0992161  |
| Br | 4.3781390  | 2.0405059 | 1.1410307  |
| H  | 1.4754419  | 7.2919480 | 2.0490278  |
| Br | -1.1413463 | 4.3981640 | -1.8130992 |

|    |            |            |            |   |            |            |            |
|----|------------|------------|------------|---|------------|------------|------------|
| H  | 0.2077797  | 2.2804055  | 2.2695340  | H | -4.6686435 | 1.2409119  | 1.0483384  |
| Zn | 0.0064449  | 2.6919235  | -0.7176502 | H | -2.8962212 | 1.4165128  | 0.8835366  |
| C  | 0.0943863  | 5.6155887  | 1.7416606  | C | -4.7674140 | 0.6788750  | 3.7644254  |
| C  | 0.8900575  | 6.5352592  | 2.6173549  | H | -3.4658041 | -0.4190705 | 2.4670317  |
| C  | 0.5223810  | 4.3443084  | 1.9455573  | H | -4.9387424 | 1.7040335  | 4.1542999  |
| C  | 0.1582521  | 3.0139313  | 1.4285677  | H | -4.6336005 | 0.0061697  | 4.6358067  |
| C  | 1.6338391  | 4.4061478  | 2.9252810  | H | -5.6868518 | 0.3674647  | 3.2267517  |
| O  | 1.8132480  | 5.6934971  | 3.3336245  | C | -0.8651272 | 4.0247301  | 5.5103946  |
| O  | 2.3114316  | 3.4674142  | 3.3203790  | C | -1.7904108 | 5.0995646  | 4.9264757  |
| H  | 0.2620133  | 7.0811548  | 3.3562925  | H | -1.5593491 | 6.0893531  | 5.3701602  |
| H  | -0.9304428 | 2.9671139  | 1.1922527  | H | -2.8572093 | 4.8865317  | 5.1476867  |
| H  | -0.7009010 | 5.9515378  | 1.0619918  | H | -1.6819990 | 5.1796110  | 3.8261680  |
| C  | 1.6500597  | 3.7874939  | -5.3286290 | C | -1.0798088 | 3.8896595  | 7.0321947  |
| C  | 1.6685862  | 3.2800809  | -4.0278710 | H | 0.1847088  | 4.3612066  | 5.3567557  |
| C  | 2.9097572  | 3.0499630  | -3.3829535 | H | -0.9261191 | 4.8628898  | 7.5428994  |
| C  | 4.1241678  | 3.3321623  | -4.0575168 | H | -0.3801416 | 3.1539699  | 7.4768329  |
| C  | 4.0969749  | 3.8458095  | -5.3582436 | H | -2.1129557 | 3.5460842  | 7.2497508  |
| C  | 2.8608111  | 4.0708662  | -5.9920996 | C | 1.1548228  | -0.5294717 | 4.6837873  |
| H  | 0.6883448  | 3.9659118  | -5.8323878 | C | 2.4956110  | 0.0566532  | 4.2112240  |
| H  | 0.7295874  | 3.0635511  | -3.5000850 | H | 3.3199248  | -0.6579889 | 4.4118293  |
| C  | 2.9833169  | 2.5337062  | -2.0278419 | H | 2.7477217  | 1.0119236  | 4.7132217  |
| H  | 5.0830136  | 3.1465010  | -3.5488016 | H | 2.4870632  | 0.2433030  | 3.1213265  |
| H  | 5.0368478  | 4.0676925  | -5.8847692 | C | 1.2324213  | -0.9539926 | 6.1635292  |
| H  | 2.8393566  | 4.4698008  | -7.0180020 | H | 0.9726420  | -1.4423429 | 4.0817174  |
| O  | 2.0035281  | 2.3269274  | -1.2803871 | H | 2.0457901  | -1.6927796 | 6.3182911  |
| C  | -1.3648292 | -1.6454604 | 1.8562999  | H | 0.2835588  | -1.4103547 | 6.5117240  |
| C  | -1.4844186 | -2.9257651 | 1.3038604  | H | 1.4400830  | -0.0806645 | 6.8168357  |
| C  | -1.4645682 | -4.0516296 | 2.2067631  | H | 3.0167898  | 1.1797171  | -5.7521034 |
| C  | -1.3997757 | -5.4049055 | 1.7567109  | H | 3.5782509  | -4.3919700 | -3.7676614 |
| C  | -1.4754637 | -3.8049960 | 3.6296265  | H | -3.1858174 | -0.5938517 | -5.6102808 |
| C  | -1.4844916 | -4.9133643 | 4.5295725  | C | 3.3175692  | 0.1093572  | -5.7325193 |
| C  | -1.4450844 | -2.4662074 | 4.1149599  | H | 3.5283121  | -3.8573606 | -0.6114407 |
| H  | -1.4659692 | -2.2962329 | 5.2022205  | H | 5.4166221  | 0.7016893  | -5.8350669 |
| C  | -1.3448474 | -1.3752574 | 3.2584149  | H | -2.7079637 | 1.4028589  | -4.0880417 |
| C  | -0.6757218 | -2.6647068 | -2.4506603 | C | 2.3102169  | -0.6024940 | -4.8366135 |
| C  | -1.6602260 | -3.4783865 | -2.9982663 | C | 2.6943998  | -4.6738047 | -3.1576798 |
| H  | -1.6662188 | -3.6618883 | -4.0834249 | C | 4.7638821  | 0.0434571  | -5.2264366 |
| C  | -2.6918316 | -4.0507208 | -2.1993768 | H | 5.1784374  | -0.9838804 | -5.2970495 |
| C  | -3.7452299 | -4.8095577 | -2.7933151 | C | 2.6673078  | -1.6575718 | -3.9824794 |
| C  | -2.6970436 | -3.8334085 | -0.7715461 | C | -2.1192032 | -0.8945077 | -5.5495631 |
| C  | -3.8003367 | -4.3354581 | -0.0173450 | H | 2.1852143  | -0.3236241 | -7.5723040 |
| C  | -1.6118575 | -3.0915980 | -0.1728907 | C | 0.9546081  | -0.2279853 | -4.8812242 |
| C  | -0.6818831 | -2.4979082 | -1.0322886 | C | 3.2172167  | -0.4170357 | -7.1783638 |
| O  | -1.3207482 | -0.5467443 | 1.0072292  | H | 3.8962443  | 0.1436708  | -7.8543050 |
| O  | 0.3549350  | -1.7400460 | -0.4953562 | H | 0.6628360  | 0.6114700  | -5.5329855 |
| P  | 0.0374047  | -0.2629014 | 0.1251360  | C | 3.2601451  | -3.0271422 | -1.2969953 |
| O  | 1.2604763  | 0.0686377  | 0.9904040  | H | 2.9917570  | -5.5233392 | -2.5084163 |
| O  | -0.4181559 | 0.7614329  | -0.9281534 | H | 1.9068007  | -5.0307834 | -3.8522393 |
| C  | -1.4485323 | -6.2167313 | 4.0573196  | C | 1.7184392  | -2.3412329 | -3.1983711 |
| C  | -1.3904027 | -6.4601173 | 2.6588134  | C | -1.6359771 | 1.1182346  | -4.0889238 |
| H  | -1.5039997 | -4.7102057 | 5.6118952  | C | -0.0349866 | -0.8755829 | -4.1209765 |
| H  | -1.4485821 | -7.0618998 | 4.7623974  | H | -2.0684737 | -1.9975489 | -5.6468079 |
| H  | -1.3444011 | -5.6087825 | 0.6783813  | H | -1.5934756 | -0.4599743 | -6.4259770 |
| H  | -1.3312898 | -7.4941288 | 2.2859956  | C | 2.1959842  | -3.4883009 | -2.3097916 |
| C  | -4.8194538 | -5.0533037 | -0.6286302 | C | 0.3522922  | -1.9586829 | -3.2788868 |
| C  | -4.7870420 | -5.3082079 | -2.0257093 | C | -1.4853943 | -0.4047684 | -4.2329961 |
| H  | -3.8451312 | -4.1383868 | 1.0625994  | H | 2.8889603  | -2.1819053 | -0.6849943 |
| H  | -5.6624434 | -5.4226924 | -0.0248363 | H | -1.1976002 | 1.4738570  | -3.1385221 |
| H  | -5.5962563 | -5.8859525 | -2.4977803 | H | 4.1929836  | -2.7027998 | -1.8038388 |
| H  | -3.7214448 | -4.9774112 | -3.8816096 | H | 4.8443302  | 0.3667891  | -4.1688621 |
| C  | -0.0233128 | 0.4197281  | 4.4587127  | H | -1.1551816 | 1.6688772  | -4.9244789 |
| C  | -1.2085416 | 0.0268081  | 3.7675205  | H | 3.4978539  | -1.4903317 | -7.2234612 |
| C  | 0.0556679  | 1.7257569  | 4.9752059  | H | 1.3259959  | -3.8549673 | -1.7286396 |
| C  | -2.2581516 | 0.9677636  | 3.5771704  | H | -2.0497929 | -0.8623746 | -3.3951888 |
| C  | -2.1285296 | 2.2590750  | 4.1259754  | H | 3.7205134  | -1.9686524 | -3.9181216 |
| C  | -0.9892155 | 2.6586901  | 4.8423595  | H | 3.9935848  | 2.3133446  | -1.6032456 |
| H  | 0.9747899  | 2.0365950  | 5.4964576  |   |            |            |            |
| C  | -3.5456882 | 0.6258773  | 2.8279521  |   |            |            |            |
| H  | -2.9552521 | 2.9712904  | 3.9861993  |   |            |            |            |
| C  | -3.7423970 | 1.5220767  | 1.5905468  |   |            |            |            |
| H  | -3.8342925 | 2.5923812  | 1.8705724  |   |            |            |            |

TS2-8-d-transmetall

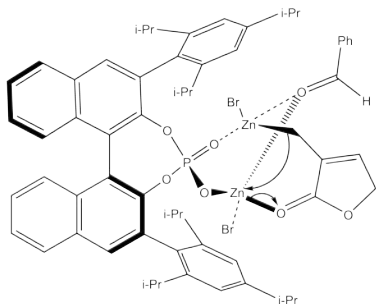

Energy(Hartree)= -11970.01299954  
 number of imaginary frequencies: 1

|    |            |            |            |
|----|------------|------------|------------|
| Zn | 2.0251703  | 1.9277260  | 1.0981908  |
| Br | 4.3452755  | 2.1075919  | 1.1173511  |
| H  | 1.4480036  | 7.3005597  | 2.0203624  |
| Br | -1.1330569 | 4.4003184  | -1.8553674 |
| H  | 0.1725835  | 2.2928815  | 2.2490407  |
| Zn | -0.0201046 | 2.6937103  | -0.7347935 |
| C  | 0.0633622  | 5.6265319  | 1.7029565  |
| C  | 0.8539742  | 6.5468852  | 2.5851063  |
| C  | 0.4848372  | 4.3554146  | 1.9190127  |
| C  | 0.1203925  | 3.0245974  | 1.4070105  |
| C  | 1.5870331  | 4.4176234  | 2.9128553  |
| O  | 1.7640489  | 5.7090098  | 3.3161084  |
| O  | 2.2520262  | 3.4787346  | 3.3217685  |
| H  | 0.2179665  | 7.0988914  | 3.3136430  |
| H  | -0.9674639 | 2.9773089  | 1.1674764  |
| H  | -0.7203060 | 5.9578890  | 1.0075256  |
| C  | 1.6741420  | 3.8129969  | -5.3354432 |
| C  | 1.6776205  | 3.2955639  | -4.0380336 |
| C  | 2.9112775  | 3.0453365  | -3.3878764 |
| C  | 4.1322781  | 3.3185835  | -4.0524056 |
| C  | 4.1202683  | 3.8411837  | -5.3496559 |
| C  | 2.8912726  | 4.0855958  | -5.9897586 |
| H  | 0.7164299  | 4.0086994  | -5.8404322 |
| H  | 0.7322662  | 3.0918278  | -3.5159587 |
| C  | 2.9675736  | 2.5165227  | -2.0338248 |
| H  | 5.0852978  | 3.1175057  | -3.5383534 |
| H  | 5.0662962  | 4.0553336  | -5.8684684 |
| H  | 2.8815824  | 4.4922752  | -7.0129052 |
| O  | 1.9788348  | 2.3143757  | -1.3011084 |
| C  | -1.3756980 | -1.6452841 | 1.8561353  |
| C  | -1.4953556 | -2.9255071 | 1.3033224  |
| C  | -1.4752984 | -4.0520061 | 2.2052981  |
| C  | -1.4127584 | -5.4049074 | 1.7544821  |
| C  | -1.4839864 | -3.8067572 | 3.6282017  |
| C  | -1.4946879 | -4.9158815 | 4.5264219  |
| C  | -1.4484838 | -2.4686094 | 4.1139454  |
| H  | -1.4643668 | -2.2980104 | 5.2011873  |
| C  | -1.3489891 | -1.3770024 | 3.2586007  |
| C  | -0.6763702 | -2.6601985 | -2.4478285 |
| C  | -1.6571695 | -3.4758167 | -2.9986508 |
| H  | -1.6582121 | -3.6576637 | -4.0840958 |
| C  | -2.6902524 | -4.0508431 | -2.2041620 |
| C  | -3.7396532 | -4.8121162 | -2.8008487 |
| C  | -2.7007311 | -3.8336856 | -0.7765642 |
| C  | -3.8053066 | -4.3381948 | -0.0263821 |
| C  | -1.6190780 | -3.0905435 | -0.1737536 |
| C  | -0.6869720 | -2.4941721 | -1.0292448 |
| O  | -1.3372170 | -0.5461681 | 1.0082672  |
| O  | 0.3454599  | -1.7347532 | -0.4891592 |
| P  | 0.0211237  | -0.2565918 | 0.1273280  |
| O  | 1.2384957  | 0.0839446  | 0.9952448  |
| O  | -0.4362064 | 0.7593583  | -0.9333313 |
| C  | -1.4626946 | -6.2185495 | 4.0535551  |
| C  | -1.4057250 | -6.4605813 | 2.6553835  |

|   |            |            |            |
|---|------------|------------|------------|
| H | -1.5119837 | -4.7133305 | 5.6088933  |
| H | -1.4642011 | -7.0641218 | 4.7580688  |
| H | -1.3587319 | -5.6069875 | 0.6758712  |
| H | -1.3492011 | -7.4942672 | 2.2814018  |
| C | -4.8200250 | -5.0586751 | -0.6408402 |
| C | -4.7823293 | -5.3135577 | -2.0372026 |
| H | -3.8525974 | -4.1411575 | 1.0533786  |
| H | -5.6638451 | -5.4303443 | -0.0396999 |
| H | -5.5883692 | -5.8932757 | -2.5121591 |
| H | -3.7119982 | -4.9793349 | -3.8891517 |
| C | -0.0137874 | 0.4127175  | 4.4508836  |
| C | -1.2059279 | 0.0235046  | 3.7698625  |
| C | 0.0709438  | 1.7169005  | 4.9700515  |
| C | -2.2560603 | 0.9657203  | 3.5917055  |
| C | -2.1199232 | 2.2552921  | 4.1425568  |
| C | -0.9738736 | 2.6510585  | 4.8497854  |
| H | 0.9962819  | 2.0262420  | 5.4808678  |
| C | -3.5506693 | 0.6255785  | 2.8539974  |
| H | -2.9473144 | 2.9686105  | 4.0125253  |
| C | -3.7584872 | 1.5220316  | 1.6188951  |
| H | -3.8469278 | 2.5925059  | 1.8994103  |
| H | -4.6899091 | 1.2425227  | 1.0848917  |
| H | -2.9198428 | 1.4155218  | 0.9033831  |
| C | -4.7632310 | 0.6775098  | 3.8021122  |
| H | -3.4739888 | -0.4190677 | 2.4913666  |
| H | -4.9308925 | 1.7018424  | 4.1955360  |
| H | -4.6209417 | 0.0044623  | 4.6716494  |
| H | -5.6884659 | 0.3672238  | 3.2738393  |
| C | -0.8400970 | 4.0146479  | 5.5209156  |
| C | -1.7676568 | 5.0938057  | 4.9488479  |
| H | -1.5306597 | 6.0818118  | 5.3936150  |
| H | -2.8331362 | 4.8838688  | 5.1791938  |
| H | -1.6691220 | 5.1765495  | 3.8477196  |
| C | -1.0406041 | 3.8753358  | 7.0440896  |
| H | 0.2088474  | 4.3491209  | 5.3580563  |
| H | -0.8793927 | 4.8458219  | 7.5577328  |
| H | -0.3392429 | 3.1358367  | 7.4791302  |
| H | -2.0719632 | 3.5328197  | 7.2709071  |
| C | 1.1656280  | -0.5378352 | 4.6634574  |
| C | 2.5040961  | 0.0488991  | 4.1848077  |
| H | 3.3288728  | -0.6672579 | 4.3770834  |
| H | 2.7625142  | 1.0020201  | 4.6875979  |
| H | 2.4906026  | 0.2380242  | 3.0957247  |
| C | 1.2521814  | -0.9672010 | 6.1412992  |
| H | 0.9785365  | -1.4483527 | 4.0592688  |
| H | 2.0662529  | -1.7065166 | 6.2892217  |
| H | 0.3056164  | -1.4240427 | 6.4950256  |
| H | 1.4640854  | -0.0964542 | 6.7964974  |
| H | 3.0257394  | 1.1745394  | -5.7538396 |
| H | 3.5818738  | -4.3861216 | -3.7444707 |
| H | -3.1760261 | -0.5973739 | -5.6220085 |
| C | 3.3248314  | 0.1036119  | -5.7275989 |
| H | 3.5217121  | -3.8424254 | -0.5878718 |
| H | 5.4260596  | 0.6917462  | -5.8314978 |
| H | -2.7043502 | 1.4050297  | -4.1028507 |
| C | 2.3159904  | -0.6024653 | -4.8286465 |
| C | 2.6965537  | -4.6660348 | -3.1358803 |
| C | 4.7706522  | 0.0387401  | -5.2200052 |
| H | 5.1839090  | -0.9893871 | -5.2845614 |
| C | 2.6708648  | -1.6534352 | -3.9690620 |
| C | -2.1095874 | -0.8971888 | -5.5559083 |
| H | 2.1944089  | -0.3411376 | -7.5651867 |
| C | 0.9607869  | -0.2284424 | -4.8784010 |
| C | 3.2260202  | -0.4316574 | -7.1701186 |
| H | 3.9059959  | 0.1232194  | -7.8499621 |
| H | 0.6705200  | 0.6086910  | -5.5339574 |
| C | 3.2555668  | -3.0144012 | -1.2766470 |
| H | 2.9927864  | -5.5140747 | -2.4842704 |
| H | 1.9114970  | -5.0247143 | -3.8321587 |
| C | 1.7200345  | -2.3347856 | -3.1856998 |
| C | -1.6329122 | 1.1191981  | -4.0988587 |

|   |            |            |            |
|---|------------|------------|------------|
| C | -0.0309947 | -0.8738499 | -4.1195449 |
| H | -2.0578591 | -2.0002548 | -5.6510037 |
| H | -1.5808685 | -0.4654871 | -6.4318247 |
| C | 2.1956352  | -3.4787532 | -2.2921618 |
| C | 0.3539913  | -1.9539359 | -3.2728718 |
| C | -1.4810959 | -0.4038885 | -4.2382638 |
| H | 2.8826285  | -2.1686958 | -0.6667265 |
| H | -1.1995675 | 1.4787115  | -3.1478871 |
| H | 4.1907782  | -2.6912678 | -1.7798417 |
| H | 4.8510101  | 0.3662068  | -4.1637653 |
| H | -1.1491940 | 1.6683831  | -4.9338035 |
| H | 3.5046597  | -1.5055260 | -7.2078105 |
| H | 1.3237947  | -3.8442025 | -1.7131481 |
| H | -2.0483968 | -0.8593215 | -3.4012780 |
| H | 3.7237958  | -1.9642774 | -3.8996987 |
| H | 3.9708269  | 2.2852185  | -1.5956963 |

## TS2-8d-2; COSMO



Energy(Hartree)= -11970.02605174

|    |            |            |            |
|----|------------|------------|------------|
| Zn | 2.3605129  | 1.1649993  | 0.6338074  |
| Br | 4.5925207  | 0.6175937  | 0.5009209  |
| H  | 3.6916332  | 5.7303420  | -0.1902334 |
| Br | -1.4459977 | 3.8142339  | -2.6936374 |
| H  | -0.4951734 | 2.8812343  | 1.5435340  |
| Zn | -0.3026339 | 2.4273825  | -1.1949713 |
| C  | 1.5703505  | 5.0543348  | -0.2838796 |
| C  | 2.7702154  | 5.6342386  | 0.4184899  |
| C  | 0.9395163  | 4.1997338  | 0.6522469  |
| C  | -0.3090651 | 3.5741682  | 0.7047476  |
| C  | 2.0711151  | 3.7745453  | 1.5282241  |
| O  | 3.0651218  | 4.6760561  | 1.4725613  |
| O  | 2.1896954  | 2.7093046  | 2.1444365  |
| H  | 2.5607932  | 6.6213054  | 0.8852144  |
| H  | -1.1800736 | 4.1193103  | 0.3044189  |
| H  | 1.0369585  | 5.6054079  | -1.0724546 |
| C  | 3.3899476  | 5.2887030  | -4.5014094 |
| C  | 3.3161875  | 4.8880741  | -3.1629760 |
| C  | 2.4961192  | 3.7990370  | -2.7835074 |
| C  | 1.7725907  | 3.1062422  | -3.7805070 |
| C  | 1.8543308  | 3.5047665  | -5.1203824 |
| C  | 2.6544036  | 4.6002146  | -5.4845109 |
| H  | 4.0314300  | 6.1368204  | -4.7847382 |
| H  | 3.9109789  | 5.4178600  | -2.4028221 |
| C  | 2.4683006  | 3.3432405  | -1.3794163 |
| H  | 1.1790601  | 2.2216529  | -3.5106484 |
| H  | 1.2886775  | 2.9521478  | -5.8859870 |
| H  | 2.7150584  | 4.9137219  | -6.5378480 |
| O  | 1.7691884  | 2.2677958  | -1.0652196 |
| C  | -1.9090724 | -1.5831592 | 1.8410593  |
| C  | -2.0204798 | -2.8995505 | 1.3775832  |
| C  | -2.1481083 | -3.9457912 | 2.3664655  |
| C  | -2.0954709 | -5.3349553 | 2.0404209  |
| C  | -2.2979792 | -3.5794531 | 3.7558155  |
| C  | -2.4697761 | -4.6047477 | 4.7345980  |
| C  | -2.2083205 | -2.2111432 | 4.1404819  |

|   |            |            |            |
|---|------------|------------|------------|
| H | -2.2890535 | -1.9541280 | 5.2076398  |
| C | -1.9528182 | -1.2039968 | 3.2166382  |
| C | -0.6159133 | -3.0006006 | -2.2057286 |
| C | -1.5004756 | -3.8771937 | -2.8229741 |
| H | -1.3291191 | -4.1701160 | -3.8698663 |
| C | -2.6604271 | -4.3680346 | -2.1546143 |
| C | -3.6073724 | -5.1893491 | -2.8379603 |
| C | -2.9112249 | -3.9999806 | -0.7801507 |
| C | -4.1363613 | -4.4194170 | -0.1804369 |
| C | -1.9336482 | -3.1981739 | -0.0826708 |
| C | -0.8656902 | -2.6951039 | -0.8321900 |
| O | -1.7803236 | -0.5458133 | 0.9188504  |
| O | 0.0646998  | -1.8662816 | -0.2075873 |
| P | -0.3654066 | -0.3325347 | 0.1353519  |
| O | 0.7375483  | 0.1986194  | 1.0650151  |
| O | -0.7133076 | 0.5048879  | -1.1045374 |
| C | -2.4526157 | -5.9440943 | 4.3763301  |
| C | -2.2441080 | -6.3082538 | 3.0192650  |
| H | -2.5964122 | -4.3080350 | 5.7876267  |
| H | -2.5789873 | -6.7247110 | 5.1418891  |
| H | -1.9236437 | -5.6358767 | 0.9981829  |
| H | -2.1932180 | -7.3717567 | 2.7401006  |
| C | -5.0460602 | -5.2006573 | -0.8803062 |
| C | -4.7747874 | -5.6045957 | -2.2147873 |
| H | -4.3625312 | -4.1070667 | 0.8486319  |
| H | -5.9875446 | -5.5043304 | -0.3976261 |
| H | -5.4991040 | -6.2315149 | -2.7567926 |
| H | -3.3987443 | -5.4732168 | -3.8814728 |
| C | -0.4283022 | 0.4639620  | 4.3361196  |
| C | -1.6434256 | 0.2014471  | 3.6340806  |
| C | -0.1718641 | 1.7751676  | 4.7716583  |
| C | -2.5312761 | 1.2699285  | 3.3380713  |
| C | -2.2194397 | 2.5667930  | 3.7947470  |
| C | -1.0560902 | 2.8429910  | 4.5321338  |
| H | 0.7571971  | 1.9750018  | 5.3299861  |
| C | -3.8431144 | 1.0575029  | 2.5841117  |
| H | -2.9282864 | 3.3796046  | 3.5785969  |
| C | -3.9139072 | 1.9034509  | 1.2993939  |
| H | -3.8898801 | 2.9908744  | 1.5215573  |
| H | -4.8550561 | 1.6991409  | 0.7488605  |
| H | -3.0706422 | 1.6709818  | 0.6195802  |
| C | -5.0559414 | 1.3165585  | 3.4977671  |
| H | -3.8921368 | -0.0073225 | 2.2797873  |
| H | -5.0917999 | 2.3736226  | 3.8348615  |
| H | -5.0201122 | 0.6764489  | 4.4027034  |
| H | -6.0039067 | 1.1027116  | 2.9619825  |
| C | -0.7221215 | 4.2316340  | 5.0764904  |
| C | 0.4552450  | 4.8686988  | 4.3120829  |
| H | 0.7511846  | 5.8329777  | 4.7743536  |
| H | 0.1668058  | 5.0708157  | 3.2594053  |
| H | 1.3421389  | 4.2052922  | 4.3019108  |
| C | -1.9182130 | 5.1901987  | 5.1232351  |
| H | -0.3795482 | 4.0730995  | 6.1244286  |
| H | -1.6370443 | 6.1336905  | 5.6331656  |
| H | -2.7789401 | 4.7512235  | 5.6670082  |
| H | -2.2636598 | 5.4611680  | 4.1032491  |
| C | 0.5980862  | -0.6266026 | 4.6514867  |
| C | 2.0181013  | -0.2636512 | 4.1824988  |
| H | 2.7179771  | -1.0971450 | 4.3966328  |
| H | 2.4122068  | 0.6411204  | 4.6887285  |
| H | 2.0369984  | -0.0781723 | 3.0933947  |
| C | 0.5883234  | -0.9746458 | 6.1525034  |
| H | 0.3024451  | -1.5387003 | 4.0952553  |
| H | 1.2975719  | -1.7999248 | 6.3700208  |
| H | -0.4183072 | -1.2891133 | 6.4947128  |
| H | 0.8894363  | -0.0997986 | 6.7662589  |
| H | 3.3213817  | 0.8204019  | -5.2264387 |
| H | 3.8883482  | -4.4742854 | -2.5778106 |
| H | -2.3787038 | -1.5910454 | -6.1998922 |
| C | 3.7924245  | 0.0225014  | -4.6110075 |
| H | 3.2151313  | -3.8478319 | 0.4971789  |



|   |            |            |            |
|---|------------|------------|------------|
| H | 5.3685868  | 1.4077361  | -3.9790836 |
| H | -2.5498463 | 0.5588892  | -4.8165017 |
| C | 2.6573638  | -0.8029604 | -4.0194909 |
| C | 2.9251548  | -4.7917849 | -2.1261107 |
| C | 4.6336414  | 0.7120094  | -3.5243275 |
| H | 5.1989056  | -0.0209557 | -2.9129433 |
| C | 2.8959996  | -1.7726898 | -3.0296568 |
| C | -1.3424666 | -1.7402171 | -5.8313059 |
| H | 4.0709368  | -1.2890620 | -6.3572533 |
| C | 1.3348337  | -0.6298590 | -4.4572117 |
| C | 4.6709126  | -0.8301686 | -5.5454468 |
| H | 5.4691757  | -0.2148711 | -6.0105983 |
| H | 1.1362390  | 0.1154679  | -5.2444357 |
| C | 3.0539897  | -3.0593386 | -0.2666857 |
| H | 3.1434940  | -5.5993114 | -1.3967197 |
| H | 2.2987789  | -5.2183303 | -2.9359229 |
| C | 1.8605738  | -2.5349374 | -2.4633795 |
| C | -1.4960442 | 0.4141159  | -4.5018905 |
| C | 0.2546081  | -1.3549282 | -3.9163198 |
| H | -1.1419121 | -2.8304644 | -5.7999910 |
| H | -0.6499191 | -1.2988133 | -6.5787321 |
| C | 2.2189488  | -3.6081924 | -1.4360743 |
| C | 0.5207239  | -2.3154142 | -2.8982404 |
| C | -1.1512172 | -1.0822104 | -4.4507777 |
| H | 2.5481745  | -2.2052144 | 0.2226584  |
| H | -1.3746460 | 0.8894716  | -3.5112137 |
| H | 4.0533204  | -2.7087474 | -0.5965044 |
| H | 3.9957809  | 1.2888274  | -2.8274875 |
| H | -0.8639438 | 0.9702636  | -5.2254810 |
| H | 5.1626668  | -1.6523869 | -4.9841337 |
| H | 1.2746505  | -4.0052128 | -1.0113332 |
| H | -1.8736799 | -1.5507419 | -3.7527221 |
| H | 3.9263810  | -1.9381777 | -2.6787270 |
| H | 3.4167034  | 3.4763239  | -0.8164422 |

## TS2-8d-2



Energy(Hartree)= -11970.01362749  
number of imaginary frequencies: 1

|    |            |           |            |
|----|------------|-----------|------------|
| Zn | 2.3684984  | 1.1624528 | 0.6288290  |
| Br | 4.6045087  | 0.6759857 | 0.4574188  |
| H  | 3.6492968  | 5.7437670 | -0.2262747 |
| Br | -1.4241847 | 3.8218039 | -2.7164567 |
| H  | -0.5107137 | 2.8715913 | 1.5229166  |
| Zn | -0.3152360 | 2.4129424 | -1.2243975 |
| C  | 1.5342972  | 5.0547180 | -0.3144710 |
| C  | 2.7300111  | 5.6444938 | 0.3863849  |
| C  | 0.9101005  | 4.1999089 | 0.6247299  |
| C  | -0.3328880 | 3.5644798 | 0.6827476  |
| C  | 2.0434852  | 3.7868512 | 1.5047669  |
| O  | 3.0326001  | 4.6983495 | 1.4445381  |
| O  | 2.1673476  | 2.7292816 | 2.1284795  |
| H  | 2.5171810  | 6.6348312 | 0.8471461  |
| H  | -1.2095565 | 4.0924667 | 0.2733794  |
| H  | 0.9994451  | 5.5879590 | -1.1144189 |
| C  | 3.4656061  | 5.2461191 | -4.5083541 |
| C  | 3.3718672  | 4.8401390 | -3.1733324 |

|   |            |            |            |
|---|------------|------------|------------|
| C | 2.5136491  | 3.7781472  | -2.8024468 |
| C | 1.7730647  | 3.1149161  | -3.8066990 |
| C | 1.8739328  | 3.5189666  | -5.1432033 |
| C | 2.7111759  | 4.5889137  | -5.4977854 |
| H | 4.1381923  | 6.0726136  | -4.7845681 |
| H | 3.9840295  | 5.3409759  | -2.4072750 |
| C | 2.4654450  | 3.3215811  | -1.4006193 |
| H | 1.1486620  | 2.2499105  | -3.5450803 |
| H | 1.2909863  | 2.9904948  | -5.9128578 |
| H | 2.7865697  | 4.9064848  | -6.5488921 |
| O | 1.7581056  | 2.2576588  | -1.0839857 |
| C | -1.9075356 | -1.5819084 | 1.8479624  |
| C | -2.0237159 | -2.8981106 | 1.3842241  |
| C | -2.1625793 | -3.9430365 | 2.3730514  |
| C | -2.1149476 | -5.3323584 | 2.0478283  |
| C | -2.3205886 | -3.5760490 | 3.7610794  |
| C | -2.5053622 | -4.6003469 | 4.7377960  |
| C | -2.2261307 | -2.2082933 | 4.1454797  |
| H | -2.3138587 | -1.9487737 | 5.2113956  |
| C | -1.9573298 | -1.2034335 | 3.2235842  |
| C | -0.6058355 | -2.9995989 | -2.1936535 |
| C | -1.4899816 | -3.8743090 | -2.8140422 |
| H | -1.3159642 | -4.1636063 | -3.8615239 |
| C | -2.6524503 | -4.3649606 | -2.1506010 |
| C | -3.5982728 | -5.1838669 | -2.8374664 |
| C | -2.9079811 | -3.9973714 | -0.7770887 |
| C | -4.1363862 | -4.4145205 | -0.1831094 |
| C | -1.9312372 | -3.1985785 | -0.0752686 |
| C | -0.8585692 | -2.6980934 | -0.8197262 |
| O | -1.7702974 | -0.5436491 | 0.9295764  |
| O | 0.0709337  | -1.8739824 | -0.1895091 |
| P | -0.3548923 | -0.3367665 | 0.1444128  |
| O | 0.7498406  | 0.1944119  | 1.0722883  |
| O | -0.6991158 | 0.4902813  | -1.1021626 |
| C | -2.4931978 | -5.9393469 | 4.3801182  |
| C | -2.2766163 | -6.3044140 | 3.0251964  |
| H | -2.6375719 | -4.3026974 | 5.7898712  |
| H | -2.6295803 | -6.7189988 | 5.1448623  |
| H | -1.9372357 | -5.6331079 | 1.0066397  |
| H | -2.2295359 | -7.3680744 | 2.7461901  |
| C | -5.0442096 | -5.1938739 | -0.8866791 |
| C | -4.7684662 | -5.5975693 | -2.2196919 |
| H | -4.3650605 | -4.1019218 | 0.8452119  |
| H | -5.9880705 | -5.4959657 | -0.4077829 |
| H | -5.4915683 | -6.2228011 | -2.7651657 |
| H | -3.3860839 | -5.4667752 | -3.8805158 |
| C | -0.4218016 | 0.4590717  | 4.3342114  |
| C | -1.6430786 | 0.2005534  | 3.6425193  |
| C | -0.1620809 | 1.7677296  | 4.7745816  |
| C | -2.5322598 | 1.2700603  | 3.3565468  |
| C | -2.2169266 | 2.5643096  | 3.8172160  |
| C | -1.0489722 | 2.8356493  | 4.5485910  |
| H | 0.7720927  | 1.9654358  | 5.3249125  |
| C | -3.8460249 | 1.0602667  | 2.6053866  |
| H | -2.9268563 | 3.3786678  | 3.6102174  |
| C | -3.9143019 | 1.9016331  | 1.3176193  |
| H | -3.8822068 | 2.9897559  | 1.5354954  |
| H | -4.8580416 | 1.7028029  | 0.7697031  |
| H | -3.0752199 | 1.6600459  | 0.6362200  |
| C | -5.0570252 | 1.3260090  | 3.5190888  |
| H | -3.8979909 | -0.0054655 | 2.3042948  |
| H | -5.0905572 | 2.3842279  | 3.8524905  |
| H | -5.0217133 | 0.6902403  | 4.4268611  |
| H | -6.0065167 | 1.1127949  | 2.9858666  |
| C | -0.7100232 | 4.2219618  | 5.0948198  |
| C | 0.4251461  | 4.8817646  | 4.2875835  |
| H | 0.7156667  | 5.8551666  | 4.7343439  |
| H | 0.0965736  | 5.0698952  | 3.2441492  |
| H | 1.3251227  | 4.2374416  | 4.2502536  |
| C | -1.9161193 | 5.1628327  | 5.2041194  |
| H | -0.3217900 | 4.0569744  | 6.1256000  |

|   |            |            |            |
|---|------------|------------|------------|
| H | -1.6308133 | 6.0998165  | 5.7236583  |
| H | -2.7509027 | 4.6996715  | 5.7674937  |
| H | -2.3013840 | 5.4508572  | 4.2033827  |
| C | 0.6062444  | -0.6347741 | 4.6313460  |
| C | 2.0305392  | -0.2524466 | 4.1926028  |
| H | 2.7213587  | -1.1067540 | 4.3430956  |
| H | 2.4352370  | 0.6055716  | 4.7670415  |
| H | 2.0554727  | 0.0161038  | 3.1217187  |
| C | 0.5813801  | -1.0247549 | 6.1215182  |
| H | 0.3208410  | -1.5310239 | 4.0445190  |
| H | 1.3040896  | -1.8410044 | 6.3279129  |
| H | -0.4226803 | -1.3683057 | 6.4413847  |
| H | 0.8553117  | -0.1606637 | 6.7622680  |
| H | 3.3120188  | 0.8300455  | -5.2295094 |
| H | 3.9067889  | -4.4448066 | -2.5622429 |
| H | -2.3664123 | -1.5982202 | -6.2045207 |
| C | 3.7873990  | 0.0301325  | -4.6197526 |
| H | 3.2387481  | -3.8165240 | 0.5120277  |
| H | 5.3774113  | 1.4098624  | -4.0114870 |
| H | -2.5596135 | 0.5420290  | -4.8102560 |
| C | 2.6561655  | -0.7914011 | -4.0155510 |
| C | 2.9464470  | -4.7664597 | -2.1077714 |
| C | 4.6469017  | 0.7166127  | -3.5460976 |
| H | 5.2195443  | -0.0166399 | -2.9422206 |
| C | 2.8993948  | -1.7518788 | -3.0183254 |
| C | -1.3307367 | -1.7413596 | -5.8320891 |
| H | 4.0356113  | -1.2848534 | -6.3683293 |
| C | 1.3327877  | -0.6284673 | -4.4536032 |
| C | 4.6486870  | -0.8273288 | -5.5657946 |
| H | 5.4440513  | -0.2170500 | -6.0423098 |
| H | 1.1299448  | 0.1104518  | -5.2458850 |
| C | 3.0686221  | -3.0297916 | -0.2515375 |
| H | 3.1711435  | -5.5716841 | -1.3778379 |
| H | 2.3214791  | -5.1975280 | -2.9160508 |
| C | 1.8687050  | -2.5175942 | -2.4485918 |
| C | -1.5077341 | 0.4020759  | -4.4876326 |
| C | 0.2564901  | -1.3559855 | -3.9091282 |
| H | -1.1206947 | -2.8300124 | -5.8079300 |
| H | -0.6388553 | -1.2906551 | -6.5743683 |
| C | 2.2349385  | -3.5856164 | -1.4185164 |
| C | 0.5278207  | -2.3095262 | -2.8857883 |
| C | -1.1500156 | -1.0914856 | -4.4464840 |
| H | 2.5571492  | -2.1808049 | 0.2406005  |
| H | -1.4009043 | 0.8698925  | -3.4919188 |
| H | 4.0642318  | -2.6697165 | -0.5819488 |
| H | 4.0229399  | 1.2953299  | -2.8386589 |
| H | -0.8745329 | 0.9713260  | -5.1999479 |
| H | 5.1433396  | -1.6518292 | -5.0106945 |
| H | 1.2935966  | -3.9874901 | -0.9917386 |
| H | -1.8713217 | -1.5704231 | -3.7545261 |
| H | 3.9302748  | -1.9083561 | -2.6651290 |
| H | 3.4044338  | 3.4605015  | -0.8220264 |

|    |            |            |            |
|----|------------|------------|------------|
| H  | -0.2065177 | 1.7495240  | 2.8819875  |
| Zn | 0.3290391  | 2.3689322  | -0.6764462 |
| C  | 1.1903774  | 4.7754976  | 2.0562927  |
| C  | 1.9671070  | 5.5921626  | 3.0395590  |
| C  | 0.9260443  | 3.5499011  | 2.5999458  |
| C  | 0.2686451  | 2.3552993  | 2.0806140  |
| C  | 1.5596149  | 3.5313102  | 3.9612247  |
| O  | 2.1695038  | 4.7422055  | 4.1762057  |
| O  | 1.5507955  | 2.6434842  | 4.7899206  |
| H  | 1.4248425  | 6.5080903  | 3.3667295  |
| H  | -0.5368418 | 2.5871189  | 1.3493381  |
| H  | 0.8299309  | 5.1616511  | 1.0924303  |
| C  | 2.7919380  | 6.4466482  | -2.0749939 |
| C  | 2.5284930  | 5.1929742  | -1.5205664 |
| C  | 3.2944150  | 4.7298627  | -0.4223932 |
| C  | 4.3346418  | 5.5431041  | 0.1003115  |
| C  | 4.5958917  | 6.7964949  | -0.4624427 |
| C  | 3.8237057  | 7.2489654  | -1.5482833 |
| H  | 2.1919525  | 6.8051275  | -2.9246885 |
| H  | 1.7186098  | 4.5693477  | -1.9213043 |
| C  | 3.0972950  | 3.4331903  | 0.1954083  |
| H  | 4.9368135  | 5.1731085  | 0.9451923  |
| H  | 5.4038290  | 7.4244988  | -0.0587066 |
| H  | 4.0289353  | 8.2355132  | -1.9915371 |
| O  | 2.2881298  | 2.5265421  | -0.1649460 |
| C  | -1.3619834 | -2.6197272 | 0.8939872  |
| C  | -1.2668769 | -3.7091623 | 0.0168761  |
| C  | -1.2627903 | -5.0312784 | 0.5962295  |
| C  | -0.9716480 | -6.2051327 | -0.1619687 |
| C  | -1.5273115 | -5.1776594 | 2.0080980  |
| C  | -1.5568979 | -6.4857908 | 2.5795507  |
| C  | -1.7154603 | -4.0197423 | 2.8159785  |
| H  | -1.9232913 | -4.1498717 | 3.8891074  |
| C  | -1.5872545 | -2.7344445 | 2.3001067  |
| C  | -0.1913714 | -2.1716216 | -3.3426466 |
| C  | -0.9769340 | -2.8811375 | -4.2419544 |
| H  | -0.9203707 | -2.6410958 | -5.3150141 |
| C  | -1.9301880 | -3.8458376 | -3.8025470 |
| C  | -2.7885992 | -4.5004325 | -4.7366722 |
| C  | -2.0988165 | -4.0982894 | -2.3893471 |
| C  | -3.1863470 | -4.9287581 | -1.9825410 |
| C  | -1.1889299 | -3.4735364 | -1.4542714 |
| C  | -0.2708687 | -2.5537414 | -1.9678752 |
| O  | -1.2865708 | -1.3223386 | 0.3861609  |
| O  | 0.6501824  | -1.9623328 | -1.1049927 |
| P  | 0.1697616  | -0.7647274 | -0.1095879 |
| O  | 1.2432877  | -0.6922042 | 0.9794209  |
| O  | -0.1750068 | 0.5350659  | -0.8638175 |
| C  | -1.2984319 | -7.6080998 | 1.8071188  |
| C  | -0.9872042 | -7.4613504 | 0.4286754  |
| H  | -1.7718101 | -6.5837176 | 3.6552936  |
| H  | -1.3161961 | -8.6099929 | 2.2624192  |
| H  | -0.7200648 | -6.1052099 | -1.2270523 |
| H  | -0.7499593 | -8.3500481 | -0.1758901 |
| C  | -4.0171958 | -5.5341545 | -2.9160965 |
| C  | -3.8069423 | -5.3378115 | -4.3066725 |
| H  | -3.3721041 | -5.0842673 | -0.9114411 |
| H  | -4.8498158 | -6.1668421 | -2.5725676 |
| H  | -4.4652391 | -5.8313116 | -5.0377794 |
| H  | -2.6378340 | -4.3079902 | -5.8105538 |
| C  | -0.6071211 | -1.2898903 | 4.1294419  |
| C  | -1.6302135 | -1.5096868 | 3.1604729  |
| C  | -0.6533137 | -0.1169871 | 4.9075231  |
| C  | -2.6700920 | -0.5490396 | 3.0012401  |
| C  | -2.6787385 | 0.5922492  | 3.8237410  |
| C  | -1.6790223 | 0.8352641  | 4.7817484  |
| H  | 0.1479724  | 0.0730935  | 5.6387165  |
| C  | -3.8081431 | -0.7270102 | 1.9969240  |
| H  | -3.4960314 | 1.3203967  | 3.7045240  |
| C  | -3.9036568 | 0.4583529  | 1.0184819  |
| H  | -4.1938298 | 1.3956106  | 1.5375441  |

### TS3-8-d-transmetall; COSMO

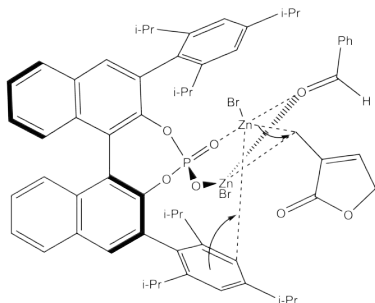

Energy(Hartree)=-11970.02108902

|    |            |           |            |
|----|------------|-----------|------------|
| Zn | 1.8369284  | 1.0503825 | 1.7612173  |
| Br | 4.0388871  | 1.0276448 | 2.5512869  |
| H  | 2.9600617  | 5.9201718 | 2.6534122  |
| Br | -0.9298717 | 4.2152133 | -1.2722303 |

|   |            |            |            |
|---|------------|------------|------------|
| H | -4.6689870 | 0.2610526  | 0.2396405  |
| H | -2.9362594 | 0.6329337  | 0.5082468  |
| C | -5.1464350 | -0.9742963 | 2.7185911  |
| H | -3.5983065 | -1.6343056 | 1.3959852  |
| H | -5.4372387 | -0.1023001 | 3.3409733  |
| H | -5.0851079 | -1.8576852 | 3.3862334  |
| H | -5.9610529 | -1.1519399 | 1.9860236  |
| C | -1.7107398 | 2.0512166  | 5.7001519  |
| C | -2.1083248 | 3.3523382  | 4.9861684  |
| H | -2.0402893 | 4.2116706  | 5.6842165  |
| H | -3.1531427 | 3.3183164  | 4.6122049  |
| H | -1.4482396 | 3.5622232  | 4.1214533  |
| C | -2.6302031 | 1.7811553  | 6.9074326  |
| H | -0.6747007 | 2.1850466  | 6.0779688  |
| H | -2.6102252 | 2.6318688  | 7.6200742  |
| H | -2.3204058 | 0.8669971  | 7.4530055  |
| H | -3.6809953 | 1.6362288  | 6.5780891  |
| C | 0.5311339  | -2.2798091 | 4.3813844  |
| C | 1.9190991  | -1.6346871 | 4.2416135  |
| H | 2.7158841  | -2.3627307 | 4.4984402  |
| H | 2.0494115  | -0.7521715 | 4.9004575  |
| H | 2.0983205  | -1.3072394 | 3.2005041  |
| C | 0.3634417  | -2.9560841 | 5.7562908  |
| H | 0.4706750  | -3.0749295 | 3.6120833  |
| H | 1.1456279  | -3.7277538 | 5.9117216  |
| H | -0.6272892 | -3.4457163 | 5.8542709  |
| H | 0.4503984  | -2.2164895 | 6.5795614  |
| H | 1.9837173  | 3.6566461  | -3.9324670 |
| H | 4.2838916  | -1.8091885 | -4.8808345 |
| H | -3.1641901 | 0.3776148  | -5.7994914 |
| C | 2.6393040  | 2.8589787  | -4.3494430 |
| H | 4.2996340  | -2.8678804 | -1.8496337 |
| H | 4.4082015  | 4.0173210  | -3.7968042 |
| H | -3.4942213 | 1.2267217  | -3.4236002 |
| C | 1.9359183  | 1.5350316  | -4.0699227 |
| C | 3.5618628  | -2.5798111 | -4.5378480 |
| C | 4.0181680  | 2.9851992  | -3.6900551 |
| H | 4.7578913  | 2.3038769  | -4.1592387 |
| C | 2.6376873  | 0.3562419  | -3.7665350 |
| C | -2.0642493 | 0.4313975  | -5.6622512 |
| H | 1.7320610  | 3.0715534  | -6.3464907 |
| C | 0.5345914  | 1.4547468  | -4.1818303 |
| C | 2.7317191  | 3.1053192  | -5.8690219 |
| H | 3.1841909  | 4.0958151  | -6.0838780 |
| H | -0.0301407 | 2.3733079  | -4.4125310 |
| C | 3.7813550  | -1.9170096 | -2.0897726 |
| H | 4.1302003  | -3.5125821 | -4.3417803 |
| H | 2.8568275  | -2.7745715 | -5.3714673 |
| C | 1.9828393  | -0.8736037 | -3.5692790 |
| C | -2.3944621 | 1.2995866  | -3.2960583 |
| C | -0.1691799 | 0.2481175  | -4.0111754 |
| H | -1.5997989 | -0.3524765 | -6.2950192 |
| H | -1.7229297 | 1.4153002  | -6.0473214 |
| C | 2.8160130  | -2.1175133 | -3.2709952 |
| C | 0.5693716  | -0.9317647 | -3.6947993 |
| C | -1.6898657 | 0.2560555  | -4.1778693 |
| H | 3.2442820  | -1.5824849 | -1.1804245 |
| H | -2.1598761 | 1.1366938  | -2.2266197 |
| H | 4.5660920  | -1.1666850 | -2.3208057 |
| H | 3.9785021  | 2.7451151  | -2.6091742 |
| H | -2.1002809 | 2.3383799  | -3.5501147 |
| H | 3.3616539  | 2.3283341  | -6.3506352 |
| H | 2.1162478  | -2.9318656 | -2.9929963 |
| H | -2.0706862 | -0.7335527 | -3.8591698 |
| H | 3.7333389  | 0.3872197  | -3.6778655 |
| H | 3.7887591  | 3.1586779  | 1.0275550  |

### TS3-8-d-transmetall

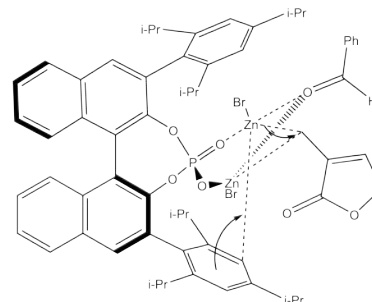

Energy(Hartree)= -11970.00797079  
number of imaginary frequencies: 1

|    |            |            |            |
|----|------------|------------|------------|
| Zn | 1.8446605  | 1.0389333  | 1.7648327  |
| Br | 4.0331414  | 1.0456708  | 2.5704853  |
| H  | 2.9751429  | 5.8944864  | 2.6398679  |
| Br | -0.8787167 | 4.2142280  | -1.3408936 |
| H  | -0.2130601 | 1.7413488  | 2.8527807  |
| Zn | 0.3424213  | 2.3600284  | -0.7006467 |
| C  | 1.2059019  | 4.7587961  | 2.0257487  |
| C  | 1.9755560  | 5.5741859  | 3.0173708  |
| C  | 0.9245804  | 3.5388571  | 2.5751210  |
| C  | 0.2648918  | 2.3497859  | 2.0551281  |
| C  | 1.5397415  | 3.5240851  | 3.9482211  |
| O  | 2.1565125  | 4.7340699  | 4.1604403  |
| O  | 1.5066333  | 2.6441579  | 4.7809960  |
| H  | 1.4356820  | 6.4976618  | 3.3297724  |
| H  | -0.5327399 | 2.5805667  | 1.3149120  |
| H  | 0.8542902  | 5.1411361  | 1.0571113  |
| C  | 2.8537708  | 6.4658691  | -2.0214510 |
| C  | 2.5716606  | 5.2080513  | -1.4848777 |
| C  | 3.3247521  | 4.7214276  | -0.3890755 |
| C  | 4.3714887  | 5.5157482  | 0.1480516  |
| C  | 4.6517398  | 6.7728929  | -0.3973095 |
| C  | 3.8917635  | 7.2492766  | -1.4808672 |
| H  | 2.2602786  | 6.8414608  | -2.8683500 |
| H  | 1.7535347  | 4.6011114  | -1.8946022 |
| C  | 3.1102814  | 3.4168677  | 0.2128978  |
| H  | 4.9642811  | 5.1264315  | 0.9910603  |
| H  | 5.4657094  | 7.3851875  | 0.0183659  |
| H  | 4.1117137  | 8.2388052  | -1.9103507 |
| O  | 2.2978283  | 2.5208576  | -0.1634810 |
| C  | -1.3607643 | -2.6194504 | 0.8874381  |
| C  | -1.2641294 | -3.7136315 | 0.0162074  |
| C  | -1.2604370 | -5.0328496 | 0.6015828  |
| C  | -0.9687983 | -6.2100490 | -0.1507842 |
| C  | -1.5259460 | -5.1728970 | 2.0136227  |
| C  | -1.5559575 | -6.4783038 | 2.5901309  |
| C  | -1.7138113 | -4.0111119 | 2.8153619  |
| H  | -1.9206285 | -4.1347587 | 3.8894389  |
| C  | -1.5854599 | -2.7281516 | 2.2942299  |
| C  | -0.1892155 | -2.1835444 | -3.3452517 |
| C  | -0.9729730 | -2.8961799 | -4.2432553 |
| H  | -0.9181464 | -2.6543552 | -5.3160465 |
| C  | -1.9231380 | -3.8632469 | -3.8033738 |
| C  | -2.7792199 | -4.5223350 | -4.7357177 |
| C  | -2.0916944 | -4.1129074 | -2.3898746 |
| C  | -3.1771304 | -4.9453170 | -1.9821450 |
| C  | -1.1837024 | -3.4844729 | -1.4555945 |
| C  | -0.2656622 | -2.5648172 | -1.9698173 |
| O  | -1.2852700 | -1.3248308 | 0.3731139  |
| O  | 0.6548091  | -1.9726275 | -1.1088094 |
| P  | 0.1757237  | -0.7707241 | -0.1169503 |
| O  | 1.2397162  | -0.6968620 | 0.9792562  |
| O  | -0.1593143 | 0.5252833  | -0.8826331 |
| C  | -1.2976141 | -7.6038881 | 1.8233862  |
| C  | -0.9854331 | -7.4632924 | 0.4451013  |

|   |            |            |            |
|---|------------|------------|------------|
| H | -1.7708631 | -6.5710394 | 3.6663229  |
| H | -1.3157838 | -8.6035814 | 2.2833671  |
| H | -0.7166885 | -6.1137487 | -1.2159792 |
| H | -0.7479703 | -8.3545502 | -0.1555122 |
| C | -4.0052333 | -5.5552087 | -2.9145536 |
| C | -3.7949806 | -5.3615473 | -4.3049003 |
| H | -3.3618861 | -5.0985442 | -0.9106507 |
| H | -4.8359182 | -6.1897181 | -2.5698658 |
| H | -4.4512610 | -5.8584876 | -5.0354123 |
| H | -2.6284748 | -4.3315048 | -5.8098882 |
| C | -0.6039867 | -1.2763257 | 4.1169346  |
| C | -1.6281224 | -1.5005867 | 3.1501384  |
| C | -0.6500659 | -0.0999653 | 4.8894591  |
| C | -2.6692809 | -0.5422408 | 2.9883978  |
| C | -2.6788304 | 0.6011991  | 3.8073427  |
| C | -1.6782784 | 0.8493073  | 4.7627726  |
| H | 0.1536139  | 0.0962775  | 5.6162498  |
| C | -3.8077433 | -0.7254988 | 1.9854988  |
| H | -3.4977984 | 1.3272878  | 3.6872287  |
| C | -3.9046436 | 0.4550808  | 1.0016622  |
| H | -4.1952045 | 1.3948708  | 1.5158315  |
| H | -4.6697593 | 0.2546675  | 0.2234998  |
| H | -2.9378085 | 0.6282244  | 0.4901358  |
| C | -5.1452164 | -0.9715032 | 2.7087570  |
| H | -3.5970266 | -1.6351407 | 1.3883580  |
| H | -5.4371066 | -0.0979161 | 3.3282083  |
| H | -5.0822106 | -1.8513690 | 3.3805659  |
| H | -5.9606815 | -1.1531950 | 1.9781719  |
| C | -1.7112327 | 2.0672422  | 5.6783537  |
| C | -2.1174534 | 3.3647061  | 4.9630437  |
| H | -2.0495855 | 4.2263236  | 5.6582392  |
| H | -3.1639373 | 3.3269196  | 4.5940644  |
| H | -1.4625073 | 3.5751200  | 4.0946507  |
| C | -2.6241095 | 1.7954125  | 6.8899478  |
| H | -0.6740923 | 2.2074138  | 6.0502464  |
| H | -2.6052986 | 2.6470420  | 7.6014592  |
| H | -2.3079033 | 0.8836225  | 7.4354517  |
| H | -3.6756957 | 1.6439587  | 6.5664376  |
| C | 0.5326051  | -2.2666348 | 4.3753934  |
| C | 1.9227981  | -1.6265292 | 4.2363399  |
| H | 2.7167165  | -2.3561471 | 4.4970016  |
| H | 2.0570456  | -0.7420240 | 4.8915577  |
| H | 2.1073583  | -1.3059497 | 3.1942022  |
| C | 0.3589912  | -2.9347112 | 5.7535944  |
| H | 0.4719957  | -3.0656206 | 3.6100607  |
| H | 1.1389376  | -3.7070015 | 5.9167398  |
| H | -0.6332510 | -3.4210630 | 5.8527595  |
| H | 0.4447712  | -2.1908737 | 6.5729449  |
| H | 1.9393710  | 3.6609727  | -3.9089390 |
| H | 4.2801965  | -1.7819309 | -4.8939495 |
| H | -3.1904977 | 0.3556867  | -5.7808604 |
| C | 2.5982157  | 2.8720516  | -4.3381938 |
| H | 4.3080034  | -2.8544562 | -1.8661204 |
| H | 4.3639211  | 4.0387804  | -3.7887569 |
| H | -3.5173907 | 1.1854753  | -3.3962047 |
| C | 1.9070868  | 1.5404829  | -4.0637956 |
| C | 3.5644843  | -2.5591151 | -4.5527975 |
| C | 3.9808955  | 3.0034590  | -3.6880730 |
| H | 4.7219440  | 2.3314271  | -4.1683588 |
| C | 2.6190592  | 0.3661842  | -3.7680775 |
| C | -2.0905634 | 0.4166946  | -5.6471789 |
| H | 1.6758425  | 3.0921552  | -6.3272474 |
| C | 0.5063975  | 1.4499551  | -4.1718650 |
| C | 2.6781454  | 3.1309229  | -5.8561815 |
| H | 3.1218733  | 4.1260258  | -6.0682145 |
| H | -0.0666826 | 2.3655828  | -4.3930615 |
| C | 3.7823158  | -1.9065518 | -2.1013525 |
| H | 4.1404433  | -3.4883957 | -4.3627950 |
| H | 2.8599871  | -2.7545184 | -5.3864963 |
| C | 1.9745973  | -0.8694888 | -3.5746731 |
| C | -2.4177288 | 1.2665114  | -3.2736061 |

|   |            |            |            |
|---|------------|------------|------------|
| C | -0.1871538 | 0.2371916  | -4.0060859 |
| H | -1.6224279 | -0.3587676 | -6.2874490 |
| H | -1.7584590 | 1.4052436  | -6.0281048 |
| C | 2.8175499  | -2.1082125 | -3.2826530 |
| C | 0.5617653  | -0.9379961 | -3.6974785 |
| C | -1.7086289 | 0.2347494  | -4.1656690 |
| H | 3.2450019  | -1.5817119 | -1.1889164 |
| H | -2.1775028 | 1.0980974  | -2.2064480 |
| H | 4.5621918  | -1.1501144 | -2.3289712 |
| H | 3.9510130  | 2.7537381  | -2.6092116 |
| H | -2.1343005 | 2.3099727  | -3.5201981 |
| H | 3.3094569  | 2.3618820  | -6.3482016 |
| H | 2.1234511  | -2.9283451 | -3.0073193 |
| H | -2.0802923 | -0.7599937 | -3.8522609 |
| H | 3.7145839  | 0.4049933  | -3.6813310 |
| H | 3.7920602  | 3.1251481  | 1.0483238  |

## TS4-8-d-transmetall; COSMO

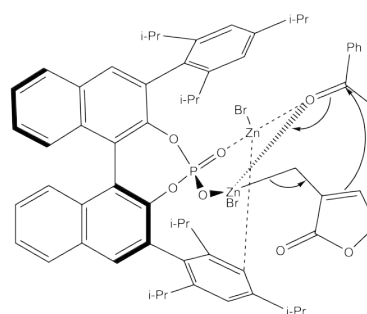

Energy(Hartree) = -11970.02708082

|    |            |            |            |
|----|------------|------------|------------|
| Zn | 2.2542831  | 1.4304243  | 0.5611252  |
| Br | 4.4828284  | 1.3745081  | -0.1539507 |
| H  | 2.6860445  | 6.4438318  | -0.1108417 |
| Br | -2.1023263 | 3.7283985  | -1.2833056 |
| H  | 1.2260620  | 2.1955083  | 2.6938765  |
| Zn | -0.5718742 | 2.0071562  | -1.7654407 |
| C  | 1.2368876  | 4.9371861  | 0.5906048  |
| C  | 2.1668997  | 6.0916223  | 0.8090643  |
| C  | 1.5715215  | 3.9250729  | 1.4739364  |
| C  | 1.0253761  | 2.6181494  | 1.6902569  |
| C  | 2.8323339  | 4.3619086  | 2.1721408  |
| O  | 3.1586385  | 5.6198946  | 1.7378631  |
| O  | 3.4899674  | 3.7622272  | 2.9982846  |
| H  | 1.6515377  | 6.9723902  | 1.2546931  |
| H  | -0.0168174 | 2.4652237  | 1.3579490  |
| H  | 0.2864743  | 5.0157210  | 0.0440498  |
| C  | 0.7683258  | 6.4171949  | -3.7014985 |
| C  | 0.7551629  | 5.3041971  | -2.8552637 |
| C  | 1.9595077  | 4.8371820  | -2.2774191 |
| C  | 3.1683984  | 5.5280913  | -2.5506597 |
| C  | 3.1773919  | 6.6321999  | -3.4133736 |
| C  | 1.9775427  | 7.0780882  | -3.9926337 |
| H  | -0.1761487 | 6.7785795  | -4.1360024 |
| H  | -0.1984293 | 4.8183071  | -2.6004083 |
| C  | 2.0825596  | 3.6647960  | -1.4076912 |
| H  | 4.1076408  | 5.1716761  | -2.0986488 |
| H  | 4.1241570  | 7.1490369  | -3.6306795 |
| H  | 1.9807436  | 7.9500962  | -4.6643982 |
| O  | 1.3585258  | 2.6080446  | -1.3865669 |
| C  | -0.5961678 | -2.6105945 | 1.6456256  |
| C  | -0.6819772 | -3.7877844 | 0.8865297  |
| C  | -0.2349490 | -5.0145595 | 1.5017197  |
| C  | -0.0924726 | -6.2369912 | 0.7780847  |
| C  | 0.1266911  | -5.0032629 | 2.8994921  |
| C  | 0.5396735  | -6.2195232 | 3.5230970  |

|   |            |            |            |   |            |            |            |
|---|------------|------------|------------|---|------------|------------|------------|
| C | 0.1074130  | -3.7779923 | 3.6248215  | H | 3.6260556  | -2.5483920 | -2.9104185 |
| H | 0.3822935  | -3.7898589 | 4.6903063  | H | 2.0535690  | 3.9320837  | -5.4585794 |
| C | -0.1970751 | -2.5645675 | 3.0167221  | H | -4.8099408 | 0.2604207  | -1.8323740 |
| C | -1.1604778 | -2.5634686 | -2.7223711 | C | 0.0305856  | 1.3082559  | -4.3023428 |
| C | -2.0991704 | -3.4585311 | -3.2171668 | C | 1.9594918  | -2.5848589 | -5.1632044 |
| H | -2.4734091 | -3.3458818 | -4.2465713 | C | 1.8775014  | 2.8951165  | -5.1106680 |
| C | -2.6664325 | -4.4699199 | -2.3856448 | H | 2.3419708  | 2.2114062  | -5.8510004 |
| C | -3.6900018 | -5.3314498 | -2.8833180 | C | 0.9526313  | 0.2509724  | -4.2092559 |
| C | -2.2750230 | -4.5666482 | -0.9963652 | C | -4.0360017 | -0.4060265 | -4.4161813 |
| C | -2.9974506 | -5.4666280 | -0.1567297 | H | -1.4217032 | 2.6024106  | -6.2616757 |
| C | -1.1993486 | -3.7314238 | -0.5121566 | C | -1.3032653 | 1.0595984  | -3.8695365 |
| C | -0.6779841 | -2.7837413 | -1.3955932 | C | -0.3233428 | 2.7196798  | -6.3474361 |
| O | -0.9503715 | -1.3935086 | 1.0628892  | H | -0.1202787 | 3.7019191  | -6.8206572 |
| O | 0.3854578  | -1.9930569 | -0.9912056 | H | -2.0625704 | 1.8476325  | -4.0117218 |
| P | 0.1148081  | -0.7239695 | 0.0144805  | C | 2.9207554  | -1.6954816 | -2.9770105 |
| O | 1.4896272  | -0.4202445 | 0.6038456  | H | 2.6916306  | -3.4179538 | -5.1502227 |
| O | -0.6713305 | 0.4133929  | -0.6478453 | H | 1.0459911  | -2.9368918 | -5.6841464 |
| C | 0.6352593  | -7.3972653 | 2.7973543  | C | 0.5861590  | -1.0274322 | -3.7516952 |
| C | 0.3323990  | -7.3982113 | 1.4093258  | C | -3.7575002 | 0.5223437  | -2.0635598 |
| H | 0.8000783  | -6.1981711 | 4.5929724  | C | -1.7277409 | -0.2286522 | -3.4450959 |
| H | 0.9628455  | -8.3260428 | 3.2887407  | H | -3.6700609 | -1.1428342 | -5.1602271 |
| H | -0.3110645 | -6.2511731 | -0.2986885 | H | -3.9986280 | 0.5972035  | -4.8902346 |
| H | 0.4417374  | -8.3255913 | 0.8265568  | C | 1.6461057  | -2.1229024 | -3.7257864 |
| C | -4.0027836 | -6.2762101 | -0.6684758 | C | -0.7654769 | -1.2762372 | -3.3779215 |
| C | -4.3410034 | -6.2257161 | -2.0467352 | C | -3.2032188 | -0.4453831 | -3.1193234 |
| H | -2.7543710 | -5.5123030 | 0.9134514  | H | 2.6979829  | -1.3568287 | -1.9468500 |
| H | -4.5452925 | -6.9590992 | 0.0029865  | H | -3.1743574 | 0.4646344  | -1.1235450 |
| H | -5.1325723 | -6.8797526 | -2.4429382 | H | 3.4530933  | -0.8718066 | -3.4960633 |
| H | -3.9682922 | -5.2561035 | -3.9463110 | H | 2.4114802  | 2.7687731  | -4.1492783 |
| C | 1.1791434  | -0.7984565 | 4.2023252  | H | -3.7466266 | 1.5773381  | -2.4038645 |
| C | -0.0923883 | -1.2599039 | 3.7465583  | H | 0.0525722  | 1.9266324  | -7.0269282 |
| C | 1.2372788  | 0.3930938  | 4.9482739  | H | 1.2169110  | -2.9935680 | -3.1907030 |
| C | -1.2570114 | -0.4861657 | 4.0104081  | H | -3.3024340 | -1.4632373 | -2.6979192 |
| C | -1.1370564 | 0.7005703  | 4.7591970  | H | 1.9923569  | 0.4187394  | -4.5205785 |
| C | 0.0949817  | 1.1533810  | 5.2584826  | H | 3.0837854  | 3.5543450  | -0.9332954 |
| H | 2.2160907  | 0.7423070  | 5.3160344  |   |            |            |            |
| C | -2.6527756 | -0.9193492 | 3.5630187  |   |            |            |            |
| H | -2.0495522 | 1.2759670  | 4.9747561  |   |            |            |            |
| C | -3.3186723 | 0.1355644  | 2.6603187  |   |            |            |            |
| H | -3.5190747 | 1.0773941  | 3.2125869  |   |            |            |            |
| H | -4.2914768 | -0.2373833 | 2.2778161  |   |            |            |            |
| H | -2.6781030 | 0.3777975  | 1.7897907  |   |            |            |            |
| C | -3.5391792 | -1.2711658 | 4.7727420  |   |            |            |            |
| H | -2.5504353 | -1.8464448 | 2.9648405  |   |            |            |            |
| H | -3.7075173 | -0.3875063 | 5.4230771  |   |            |            |            |
| H | -3.0735874 | -2.0623490 | 5.3951473  |   |            |            |            |
| H | -4.5326283 | -1.6362137 | 4.4385302  |   |            |            |            |
| C | 0.2326687  | 2.4204859  | 6.0994240  |   |            |            |            |
| C | 0.7524965  | 3.5994369  | 5.2536284  |   |            |            |            |
| H | 0.8953916  | 4.5013492  | 5.8846142  |   |            |            |            |
| H | 0.0280246  | 3.8547470  | 4.4518706  |   |            |            |            |
| H | 1.7214625  | 3.3673141  | 4.7692608  |   |            |            |            |
| C | -1.0495327 | 2.8089080  | 6.8478462  |   |            |            |            |
| H | 1.0119399  | 2.1987895  | 6.8632700  |   |            |            |            |
| H | -0.8501440 | 3.6503479  | 7.5419384  |   |            |            |            |
| H | -1.4548443 | 1.9633717  | 7.4400897  |   |            |            |            |
| H | -1.8443340 | 3.1462187  | 6.1498243  |   |            |            |            |
| C | 2.4828657  | -1.5554250 | 3.9395910  |   |            |            |            |
| C | 3.5665718  | -0.6682101 | 3.3034833  |   |            |            |            |
| H | 4.4944877  | -1.2513123 | 3.1324682  |   |            |            |            |
| H | 3.8325628  | 0.2026906  | 3.9366721  |   |            |            |            |
| H | 3.2403085  | -0.2857913 | 2.3190777  |   |            |            |            |
| C | 3.0057266  | -2.2137404 | 5.2315481  |   |            |            |            |
| H | 2.2645396  | -2.3640030 | 3.2131653  |   |            |            |            |
| H | 3.9171845  | -2.8125482 | 5.0265593  |   |            |            |            |
| H | 2.2502570  | -2.8847124 | 5.6885082  |   |            |            |            |
| H | 3.2690394  | -1.4470687 | 5.9900640  |   |            |            |            |
| H | -0.0604453 | 3.4393087  | -4.3434829 |   |            |            |            |
| H | 2.3965405  | -1.7603408 | -5.7645624 |   |            |            |            |
| H | -5.0990582 | -0.6355801 | -4.1983133 |   |            |            |            |
| C | 0.3744362  | 2.6334544  | -4.9737189 |   |            |            |            |

### TS4-8-d-transmetall

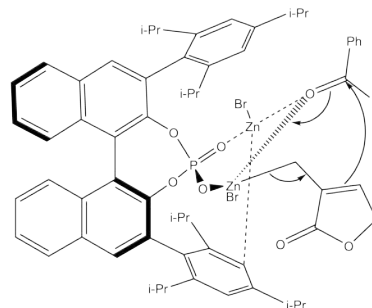

Energy(Hartree)= -11970.01324207  
number of imaginary frequencies: 1

|    |            |           |            |
|----|------------|-----------|------------|
| Zn | 2.3047511  | 1.3947715 | 0.5940260  |
| Br | 4.5069793  | 1.3436308 | -0.1671447 |
| H  | 2.7097926  | 6.4133498 | -0.1018647 |
| Br | -2.0915624 | 3.7568035 | -1.4113888 |
| H  | 1.2253889  | 2.1687502 | 2.6943594  |
| Zn | -0.5499262 | 2.0226038 | -1.7559441 |
| C  | 1.2581691  | 4.8973566 | 0.5751072  |
| C  | 2.1807071  | 6.0567060 | 0.8110613  |
| C  | 1.5819977  | 3.8901892 | 1.4696855  |
| C  | 1.0391722  | 2.5840183 | 1.6847536  |
| C  | 2.8323195  | 4.3331408 | 2.1882131  |
| O  | 3.1592244  | 5.5931022 | 1.7529434  |
| O  | 3.4734700  | 3.7369660 | 3.0260270  |
| H  | 1.6513213  | 6.9347420 | 1.2477031  |
| H  | 0.0046724  | 2.4200146 | 1.3346454  |
| H  | 0.3127265  | 4.9734061 | 0.0192348  |
| C  | 0.8851384  | 6.4400037 | -3.6745401 |

|   |            |            |            |   |            |            |            |
|---|------------|------------|------------|---|------------|------------|------------|
| C | 0.8424692  | 5.3172809  | -2.8422386 | H | 0.9812487  | 2.2165387  | 6.8540315  |
| C | 2.0311217  | 4.8221655  | -2.2568360 | H | -0.8840607 | 3.6721952  | 7.5151435  |
| C | 3.2558387  | 5.4891381  | -2.5160016 | H | -1.4895714 | 1.9857716  | 7.4126817  |
| C | 3.2948757  | 6.5999564  | -3.3694603 | H | -1.8676153 | 3.1665706  | 6.1172940  |
| C | 2.1091639  | 7.0790862  | -3.9501868 | C | 2.4712221  | -1.5441755 | 3.9498530  |
| H | -0.0491347 | 6.8256761  | -4.1105220 | C | 3.5623355  | -0.6608551 | 3.3216498  |
| H | -0.1224873 | 4.8464432  | -2.6009635 | H | 4.4900818  | -1.2455883 | 3.1570670  |
| C | 2.1211164  | 3.6414458  | -1.3900387 | H | 3.8262784  | 0.2128066  | 3.9515096  |
| H | 4.1824941  | 5.1082607  | -2.0576476 | H | 3.2474149  | -0.2827575 | 2.3319807  |
| H | 4.2540061  | 7.0987299  | -3.5748162 | C | 2.9817845  | -2.1986135 | 5.2487126  |
| H | 2.1356163  | 7.9587193  | -4.6114630 | H | 2.2589616  | -2.3542773 | 3.2234518  |
| O | 1.3813784  | 2.5964360  | -1.3919618 | H | 3.8948096  | -2.7985025 | 5.0545892  |
| C | -0.5963494 | -2.6048349 | 1.6358825  | H | 2.2222222  | -2.8672048 | 5.7022764  |
| C | -0.6703752 | -3.7849622 | 0.8801674  | H | 3.2384791  | -1.4300538 | 6.0073515  |
| C | -0.2178244 | -5.0070299 | 1.5002332  | H | -0.1357516 | 3.4422438  | -4.3287239 |
| C | -0.0638479 | -6.2301930 | 0.7807359  | H | 2.3835484  | -1.7203176 | -5.7879872 |
| C | 0.1354940  | -4.9901777 | 2.8997107  | H | -5.1462778 | -0.6726093 | -4.1133675 |
| C | 0.5520412  | -6.2022832 | 3.5279415  | C | 0.2959032  | 2.6479901  | -4.9766335 |
| C | 0.1034584  | -3.7632648 | 3.6210144  | H | 3.6256397  | -2.5018369 | -2.9380877 |
| H | 0.3726518  | -3.7689601 | 4.6879459  | H | 1.9601630  | 3.9625969  | -5.4764930 |
| C | -0.2039832 | -2.5527929 | 3.0087937  | H | -4.7997068 | 0.2210962  | -1.7513561 |
| C | -1.1593464 | -2.5742686 | -2.7314258 | C | -0.0265853 | 1.3117976  | -4.3135814 |
| C | -2.0894330 | -3.4790457 | -3.2239442 | C | 1.9573706  | -2.5520764 | -5.1887960 |
| H | -2.4675605 | -3.3683773 | -4.2522486 | C | 1.7946898  | 2.9221035  | -5.1341762 |
| C | -2.6456130 | -4.4950770 | -2.3911802 | H | 2.2524257  | 2.2465560  | -5.8862458 |
| C | -3.6601266 | -5.3684084 | -2.8855384 | C | 0.9102556  | 0.2661396  | -4.2283122 |
| C | -2.2537370 | -4.5829587 | -1.0016317 | C | -4.0901827 | -0.4366227 | -4.3567600 |
| C | -2.9688034 | -5.4861532 | -0.1593857 | H | -1.5192611 | 2.6189408  | -6.2379053 |
| C | -1.1857266 | -3.7367616 | -0.5192389 | C | -1.3530422 | 1.0433801  | -3.8752790 |
| C | -0.6715018 | -2.7870572 | -1.4052389 | C | -0.4232224 | 2.7455106  | -6.3381744 |
| O | -0.9525222 | -1.3923975 | 1.0454222  | H | -0.2349700 | 3.7338833  | -6.8047721 |
| O | 0.3858207  | -1.9872654 | -1.0091821 | H | -2.1185739 | 1.8293443  | -3.9879286 |
| P | 0.1259723  | -0.7240686 | 0.0080054  | C | 2.9079753  | -1.6589640 | -2.9994591 |
| O | 1.4978759  | -0.4401134 | 0.6084192  | H | 2.7005298  | -3.3754074 | -5.1806282 |
| O | -0.6472251 | 0.4249902  | -0.6511162 | H | 1.0486848  | -2.9136185 | -5.7115573 |
| C | 0.6587369  | -7.3809342 | 2.8062354  | C | 0.5637863  | -1.0176042 | -3.7708343 |
| C | 0.3639428  | -7.3870271 | 1.4170736  | C | -3.7544810 | 0.4873770  | -2.0088878 |
| H | 0.8066506  | -6.1764211 | 4.5990984  | C | -1.7569060 | -0.3464043 | -3.4433639 |
| H | 0.9892460  | -8.3063216 | 3.3019167  | H | -3.7395959 | -1.1688385 | -5.1126750 |
| H | -0.2769538 | -6.2470579 | -0.2970154 | H | -4.0716863 | 0.5675820  | -4.8299049 |
| H | 0.4820780  | -8.3150305 | 0.8371174  | C | 1.6386769  | -2.0990840 | -3.7499625 |
| C | -3.9653369 | -6.3073472 | -0.6686197 | C | -0.7818052 | -1.2830026 | -3.3884249 |
| C | -4.3027745 | -6.2658462 | -2.0467771 | C | -3.2233535 | -0.4741089 | -3.0828097 |
| H | -2.7252474 | -5.5246674 | 0.9108370  | H | 2.6845568  | -1.3310020 | -1.9662944 |
| H | -4.5015912 | -6.9926141 | 0.0053634  | H | -3.1477813 | 0.4260328  | -1.0843047 |
| H | -5.0874566 | -6.9290336 | -2.4413233 | H | 3.4300148  | -0.8250388 | -3.5125516 |
| H | -3.9385890 | -5.2992842 | -3.9489465 | H | 2.3430878  | 2.7935497  | -4.1813715 |
| C | 1.1655236  | -0.7858987 | 4.2001165  | H | -3.7551175 | 1.5446897  | -2.3420292 |
| C | -0.1034847 | -1.2468519 | 3.7363875  | H | -0.0532949 | 1.9625483  | -7.0324526 |
| C | 1.2188925  | 0.4069345  | 4.9438646  | H | 1.2200661  | -2.9766144 | -3.2174237 |
| C | -1.2694707 | -0.4732322 | 3.9931213  | H | -3.3057183 | -1.4940623 | -2.6625677 |
| C | -1.1535543 | 0.7146625  | 4.7400443  | H | 1.9468143  | 0.4486843  | -4.5417432 |
| C | 0.0753284  | 1.1683407  | 5.2452746  | H | 3.1130034  | 3.5121764  | -0.9005210 |
| H | 2.1958514  | 0.7581652  | 5.3143663  |   |            |            |            |
| C | -2.6626569 | -0.9073839 | 3.5387156  |   |            |            |            |
| H | -2.0670667 | 1.2908127  | 4.9487878  |   |            |            |            |
| C | -3.3223181 | 0.1440699  | 2.6276554  |   |            |            |            |
| H | -3.5256611 | 1.0885656  | 3.1740526  |   |            |            |            |
| H | -4.2929065 | -0.2288794 | 2.2397561  |   |            |            |            |
| H | -2.6760552 | 0.3829397  | 1.7606643  |   |            |            |            |
| C | -3.5564758 | -1.2545013 | 4.7441356  |   |            |            |            |
| H | -2.5568001 | -1.8368613 | 2.9447390  |   |            |            |            |
| H | -3.7284867 | -0.3689630 | 5.3907507  |   |            |            |            |
| H | -3.0947824 | -2.0428591 | 5.3726554  |   |            |            |            |
| H | -4.5482736 | -1.6203708 | 4.4060581  |   |            |            |            |
| C | 0.2084518  | 2.4376926  | 6.0833470  |   |            |            |            |
| C | 0.7369947  | 3.6132812  | 5.2385202  |   |            |            |            |
| H | 0.8766736  | 4.5168672  | 5.8677212  |   |            |            |            |
| H | 0.0188430  | 3.8673745  | 4.4307276  |   |            |            |            |
| H | 1.7097515  | 3.3788913  | 4.7631882  |   |            |            |            |
| C | -1.0784893 | 2.8291980  | 6.8216397  |   |            |            |            |

### int1-8-d; COSMO

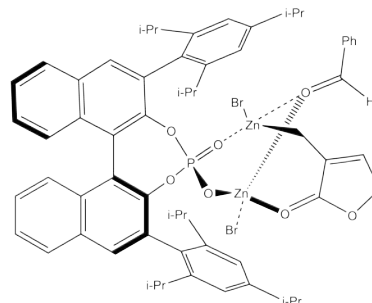

Energy(Hartree) = -11970.0475287

|    |           |           |            |
|----|-----------|-----------|------------|
| Zn | 2.6758207 | 1.2869402 | -0.0642540 |
| Br | 4.0899358 | 0.9325406 | -1.8777066 |
| H  | 2.8040227 | 6.1867290 | 2.6616956  |

|    |            |            |            |   |            |            |            |
|----|------------|------------|------------|---|------------|------------|------------|
| Br | -2.3413749 | 4.1795770  | 1.3013699  | H | -2.2027519 | 0.9068217  | 4.8926580  |
| H  | 1.1494278  | 1.2259971  | 2.6748415  | H | -3.5374180 | 0.0479913  | 4.0622508  |
| Zn | -0.6577629 | 2.5381502  | 1.3099173  | H | -2.0547380 | 0.4862342  | 3.1546679  |
| C  | 1.6126569  | 4.5260347  | 3.4691951  | C | -2.3693354 | -1.7692057 | 5.8300833  |
| C  | 2.9005812  | 5.2324309  | 3.2260996  | H | -2.0921506 | -1.9484954 | 3.7129304  |
| C  | 1.6349209  | 3.2979000  | 2.8640502  | H | -2.1495103 | -1.0876615 | 6.6782939  |
| C  | 0.6571525  | 2.2093337  | 2.8014365  | H | -1.9367064 | -2.7606628 | 6.0745482  |
| C  | 2.9493039  | 3.2209047  | 2.1915819  | H | -3.4717480 | -1.8799834 | 5.7700924  |
| O  | 3.6785028  | 4.3255992  | 2.4185450  | C | 2.4420545  | 0.6901408  | 6.5825544  |
| O  | 3.4350597  | 2.3040388  | 1.5006168  | C | 2.7401683  | 2.0834369  | 5.9948626  |
| H  | 3.4766136  | 5.4484751  | 4.1533508  | H | 3.3199874  | 2.7031303  | 6.7105177  |
| H  | 0.0297972  | 2.1777392  | 3.7133127  | H | 1.7973417  | 2.6183897  | 5.7584848  |
| H  | 0.7933456  | 4.9466606  | 4.0674487  | H | 3.3199949  | 2.0089618  | 5.0527403  |
| C  | -0.6890699 | 6.5195476  | -1.6184523 | C | 1.6865507  | 0.8077852  | 7.9131225  |
| C  | -0.0060926 | 5.3872327  | -1.1704532 | H | 3.4218828  | 0.2058946  | 6.7938495  |
| C  | 0.7813372  | 4.6374325  | -2.0772718 | H | 2.2997000  | 1.3511067  | 8.6605807  |
| C  | 0.8975697  | 5.0527813  | -3.4268516 | H | 1.4357323  | -0.1879076 | 8.3315205  |
| C  | 0.2167346  | 6.1913820  | -3.8683401 | H | 0.7391449  | 1.3748652  | 7.7973854  |
| C  | -0.5804111 | 6.9196414  | -2.9648327 | C | 2.8244687  | -2.3109693 | 2.5192006  |
| H  | -1.3215046 | 7.0859306  | -0.9188760 | C | 3.9566628  | -1.3811301 | 2.0458833  |
| H  | -0.1079493 | 5.0565104  | -0.1269963 | H | 4.3937288  | -1.7512207 | 1.0967171  |
| C  | 1.4657785  | 3.4253289  | -1.6684928 | H | 4.7809553  | -1.3182767 | 2.7866515  |
| H  | 1.5213565  | 4.4692399  | -4.1202122 | H | 3.5890394  | -0.3512505 | 1.8763637  |
| H  | 0.3001633  | 6.5134122  | -4.9169523 | C | 3.4109357  | -3.6517294 | 3.0011556  |
| H  | -1.1243087 | 7.8108747  | -3.3144484 | H | 2.1800584  | -2.5143693 | 1.6388861  |
| O  | 1.4221767  | 2.9452560  | -0.5124156 | H | 4.0535339  | -4.1021670 | 2.2163707  |
| C  | -0.7883504 | -2.3380205 | 1.4522879  | H | 2.6202930  | -4.3845897 | 3.2530177  |
| C  | -1.3704712 | -3.1802134 | 0.4982091  | H | 4.0344835  | -3.5020941 | 3.9076598  |
| C  | -1.2054539 | -4.6048721 | 0.6674971  | H | 0.9211203  | 3.3572375  | -5.9971256 |
| C  | -1.6035282 | -5.5559217 | -0.3205476 | H | 1.2171331  | -2.5384177 | -6.0804680 |
| C  | -0.5798097 | -5.0968409 | 1.8722377  | H | -4.7912573 | 2.1939422  | -3.7178072 |
| C  | -0.4470511 | -6.5049590 | 2.0661377  | C | 1.3275556  | 2.3270912  | -6.1107638 |
| C  | -0.0674343 | -4.1736539 | 2.8283262  | H | 2.2716507  | -3.3398817 | -3.1595490 |
| H  | 0.3992914  | -4.5632799 | 3.7457631  | H | 3.3651630  | 3.1013113  | -6.3534218 |
| C  | -0.1112841 | -2.8000018 | 2.6204491  | H | -3.3826025 | 3.3259383  | -1.8886037 |
| C  | -1.9283352 | -1.2076551 | -2.7489960 | C | 0.5070576  | 1.4269509  | -5.1948243 |
| C  | -3.1810746 | -1.6664871 | -3.1388356 | C | 0.5303325  | -2.9817186 | -5.3292625 |
| H  | -3.5937860 | -1.3508198 | -4.1090944 | C | 2.8192994  | 2.3586964  | -5.7359072 |
| C  | -3.9623692 | -2.5183010 | -2.3042779 | H | 3.3002419  | 1.3729130  | -5.9018649 |
| C  | -5.2835213 | -2.9073138 | -2.6797966 | C | 0.8842401  | 0.0937907  | -4.9591977 |
| C  | -3.4202892 | -2.9895532 | -1.0510611 | C | -3.8646803 | 1.8077169  | -4.1909991 |
| C  | -4.2521975 | -3.7875239 | -0.2097176 | H | 0.0652826  | 1.9478377  | -7.8729994 |
| C  | -2.0776334 | -2.6093184 | -0.6846478 | C | -0.6734163 | 1.8900444  | -4.5898920 |
| C  | -1.4238101 | -1.6815972 | -1.5006618 | C | 1.1359008  | 1.9257154  | -7.5860423 |
| O  | -0.9152978 | -0.9606272 | 1.3064280  | H | 1.6903793  | 2.6108713  | -8.2607382 |
| O  | -0.1639489 | -1.2228217 | -1.1249937 | H | -0.9750031 | 2.9374720  | -4.7534967 |
| P  | -0.0752442 | -0.1806414 | 0.1320985  | C | 1.9892517  | -2.2852210 | -3.3581723 |
| O  | 1.4195872  | -0.1070186 | 0.4797817  | H | 0.8278254  | -4.0414726 | -5.1869595 |
| O  | -0.8457844 | 1.1235085  | -0.1178941 | H | -0.4925270 | -2.9660464 | -5.7580481 |
| C  | -0.8745809 | -7.4021203 | 1.0990314  | C | 0.1131721  | -0.7743345 | -4.1681615 |
| C  | -1.4415887 | -6.9186484 | -0.1104047 | C | -2.4758884 | 2.9856815  | -2.4280881 |
| H  | 0.0205975  | -6.8644178 | 2.9962923  | C | -1.4810795 | 1.0662954  | -3.7797884 |
| H  | -0.7595328 | -8.4851888 | 1.2577158  | H | -4.1071972 | 0.8444000  | -4.6833307 |
| H  | -2.0345632 | -5.1993389 | -1.2659743 | H | -3.5682564 | 2.5220329  | -4.9880541 |
| H  | -1.7506731 | -7.6296275 | -0.8918253 | C | 0.5891953  | -2.2158275 | -3.9940839 |
| C  | -5.5398556 | -4.1331673 | -0.5971372 | C | -1.0921608 | -0.2880135 | -3.5842561 |
| C  | -6.0580782 | -3.7021406 | -1.8477455 | C | -2.7419853 | 1.6539093  | -3.1472997 |
| H  | -3.8652695 | -4.1200580 | 0.7638421  | H | 2.0230802  | -1.7283415 | -2.4021892 |
| H  | -6.1656476 | -4.7417028 | 0.0734627  | H | -1.6742204 | 2.8753879  | -1.6756817 |
| H  | -7.0778043 | -3.9883051 | -2.1473067 | H | 2.7642315  | -1.8515392 | -4.0236270 |
| H  | -5.6820983 | -2.5499344 | -3.6423236 | H | 2.9773645  | 2.6107350  | -4.6671696 |
| C  | 1.9338446  | -1.6612819 | 3.5790468  | H | -2.1859420 | 3.7942860  | -3.1313763 |
| C  | 0.5205677  | -1.8418955 | 3.5856484  | H | 1.5109792  | 0.8963197  | -7.7654447 |
| C  | 2.5105279  | -0.8481110 | 4.5703187  | H | -0.1110211 | -2.7278944 | -3.3039971 |
| C  | -0.2806972 | -1.1403714 | 4.5232279  | H | -3.0899649 | 0.9373937  | -2.3755607 |
| C  | 0.3485157  | -0.3307576 | 5.4899273  | H | 1.8114110  | -0.2904477 | -5.4122022 |
| C  | 1.7439571  | -0.1888939 | 5.5490415  | H | 2.0736205  | 2.8947530  | -2.4433477 |
| H  | 3.6043541  | -0.7158148 | 4.5836661  |   |            |            |            |
| C  | -1.8054189 | -1.2266551 | 4.5049925  |   |            |            |            |
| H  | -0.2807048 | 0.1998720  | 6.2204551  |   |            |            |            |
| C  | -2.4332501 | 0.1303515  | 4.1333129  |   |            |            |            |

int1-8-d



Energy(Hartree)= -11970.03452476

|    |            |            |            |
|----|------------|------------|------------|
| Zn | 2.6927853  | 1.2696428  | -0.0763174 |
| Br | 4.0911905  | 0.9224421  | -1.8932276 |
| H  | 2.7104503  | 6.1905592  | 2.6201405  |
| Br | -2.2568550 | 4.2702024  | 1.3112492  |
| H  | 1.1328620  | 1.2068169  | 2.6822955  |
| Zn | -0.6753587 | 2.5427149  | 1.3216229  |
| C  | 1.5543767  | 4.5208291  | 3.4608336  |
| C  | 2.8292497  | 5.2460485  | 3.1980136  |
| C  | 1.5953369  | 3.2848394  | 2.8723061  |
| C  | 0.6338639  | 2.1849596  | 2.8172102  |
| C  | 2.9075921  | 3.2224253  | 2.1890049  |
| O  | 3.6182278  | 4.3451737  | 2.3989598  |
| O  | 3.4012531  | 2.3090053  | 1.5046510  |
| H  | 3.4087420  | 5.4874432  | 4.1176259  |
| H  | 0.0019583  | 2.1470820  | 3.7254573  |
| H  | 0.7256783  | 4.9357620  | 4.0497542  |
| C  | -0.6382093 | 6.5222057  | -1.6716412 |
| C  | 0.0304620  | 5.3843428  | -1.2153785 |
| C  | 0.8246461  | 4.6306370  | -2.1117886 |
| C  | 0.9628807  | 5.0464072  | -3.4584505 |
| C  | 0.2994191  | 6.1925892  | -3.9067882 |
| C  | -0.5052885 | 6.9254189  | -3.0140704 |
| H  | -1.2810870 | 7.0858206  | -0.9793239 |
| H  | -0.0958813 | 5.0493868  | -0.1755865 |
| C  | 1.4926066  | 3.4098749  | -1.6931154 |
| H  | 1.5881957  | 4.4554080  | -4.1440392 |
| H  | 0.4005987  | 6.5154426  | -4.9537028 |
| H  | -1.0376126 | 7.8210857  | -3.3704927 |
| O  | 1.4419521  | 2.9423476  | -0.5342425 |
| C  | -0.7839186 | -2.3357816 | 1.4577801  |
| C  | -1.3665888 | -3.1760809 | 0.5020785  |
| C  | -1.1999429 | -4.6011151 | 0.6665267  |
| C  | -1.5983015 | -5.5489899 | -0.3241468 |
| C  | -0.5728817 | -5.0970163 | 1.8686096  |
| C  | -0.4390723 | -6.5052810 | 2.0567838  |
| C  | -0.0612046 | -4.1763313 | 2.8269135  |
| H  | 0.4064767  | -4.5667099 | 3.7435984  |
| C  | -0.1062218 | -2.8022395 | 2.6240283  |
| C  | -1.9284052 | -1.1967199 | -2.7392423 |
| C  | -3.1806660 | -1.6558310 | -3.1292594 |
| H  | -3.5925539 | -1.3376902 | -4.0990460 |
| C  | -3.9608228 | -2.5105632 | -2.2971036 |
| C  | -5.2807960 | -2.9015455 | -2.6728042 |
| C  | -3.4175032 | -2.9843527 | -1.0456273 |
| C  | -4.2472324 | -3.7871051 | -0.2071467 |
| C  | -2.0755643 | -2.6029366 | -0.6784456 |
| C  | -1.4230347 | -1.6724149 | -1.4920830 |
| O  | -0.9113430 | -0.9584109 | 1.3172128  |
| O  | -0.1639538 | -1.2136185 | -1.1164715 |
| P  | -0.0746326 | -0.1736923 | 0.1430055  |
| O  | 1.4200719  | -0.1012428 | 0.4900879  |
| O  | -0.8456823 | 1.1299351  | -0.1063917 |
| C  | -0.8668909 | -7.3991889 | 1.0875974  |
| C  | -1.4354954 | -6.9118823 | -0.1188286 |
| H  | 0.0303787  | -6.8675500 | 2.9849365  |
| H  | -0.7505620 | -8.4826276 | 1.2423991  |

|   |            |            |            |
|---|------------|------------|------------|
| H | -2.0307275 | -5.1884011 | -1.2672897 |
| H | -1.7451305 | -7.6201138 | -0.9024463 |
| C | -5.5334533 | -4.1350685 | -0.5956323 |
| C | -6.0530006 | -3.7010782 | -1.8439756 |
| H | -3.8579707 | -4.1218226 | 0.7646131  |
| H | -6.1571821 | -4.7479351 | 0.0728618  |
| H | -7.0719856 | -3.9886618 | -2.1445021 |
| H | -5.6805191 | -2.5413630 | -3.6337982 |
| C | 1.9327166  | -1.6510576 | 3.5821020  |
| C | 0.5217910  | -1.8475727 | 3.5949078  |
| C | 2.5042308  | -0.8373524 | 4.5753947  |
| C | -0.2824503 | -1.1652664 | 4.5434018  |
| C | 0.3419416  | -0.3537078 | 5.5113282  |
| C | 1.7352199  | -0.1931352 | 5.5617909  |
| H | 3.5964466  | -0.6925126 | 4.5836125  |
| C | -1.8058054 | -1.2739964 | 4.5343924  |
| H | -0.2897937 | 0.1622150  | 6.2500722  |
| C | -2.4561893 | 0.0726150  | 4.1643783  |
| H | -2.2295253 | 0.8549945  | 4.9188301  |
| H | -3.5597773 | -0.0244383 | 4.1048092  |
| H | -2.0930908 | 0.4299719  | 3.1806708  |
| C | -2.3536909 | -1.8242850 | 5.8628027  |
| H | -2.0856505 | -2.0009115 | 3.7444394  |
| H | -2.1413608 | -1.1390104 | 6.7098232  |
| H | -1.9031871 | -2.8077066 | 6.1066135  |
| H | -3.4543789 | -1.9534731 | 5.8093886  |
| C | 2.4294065  | 0.6896370  | 6.5948837  |
| C | 2.7325814  | 2.0801020  | 6.0029663  |
| H | 3.3110922  | 2.7019182  | 6.7179496  |
| H | 1.7917804  | 2.6159444  | 5.7608304  |
| H | 3.3150048  | 2.0008868  | 5.0628750  |
| C | 1.6690893  | 0.8142851  | 7.9217082  |
| H | 3.4074228  | 0.2044480  | 6.8131047  |
| H | 2.2796596  | 1.3585544  | 8.6704909  |
| H | 1.4130957  | -0.1788797 | 8.3424103  |
| H | 0.7239452  | 1.3838348  | 7.8001043  |
| C | 2.8249706  | -2.2850763 | 2.5142113  |
| C | 3.9563381  | -1.3483253 | 2.0528613  |
| H | 4.3870620  | -1.6986709 | 1.0934654  |
| H | 4.7861891  | -1.3029516 | 2.7887845  |
| H | 3.5917258  | -0.3135940 | 1.9083260  |
| C | 3.4127946  | -3.6312664 | 2.9786808  |
| H | 2.1811714  | -2.4778173 | 1.6311571  |
| H | 4.0597483  | -4.0683015 | 2.1900901  |
| H | 2.6233114  | -4.3701934 | 3.2152287  |
| H | 4.0317984  | -3.4941543 | 3.8901433  |
| H | 0.9251624  | 3.3601919  | -5.9925544 |
| H | 1.2010014  | -2.5362214 | -6.0798058 |
| H | -4.7822114 | 2.2175024  | -3.6779914 |
| C | 1.3187446  | 2.3261995  | -6.1186907 |
| H | 2.2640222  | -3.3388667 | -3.1601994 |
| H | 3.3598594  | 3.0835700  | -6.3919555 |
| H | -3.3539391 | 3.3410853  | -1.8539815 |
| C | 0.5039285  | 1.4309340  | -5.1929034 |
| C | 0.5159475  | -2.9767813 | -5.3255281 |
| C | 2.8175887  | 2.3399730  | -5.7723118 |
| H | 3.2865452  | 1.3523603  | -5.9593941 |
| C | 0.8788354  | 0.0974285  | -4.9581335 |
| C | -3.8610569 | 1.8271519  | -4.1580556 |
| H | 0.0187649  | 1.9702761  | -7.8577600 |
| C | -0.6707995 | 1.8985891  | -4.5806866 |
| C | 1.0942449  | 1.9348420  | -7.5919617 |
| H | 1.6441418  | 2.6152074  | -8.2752323 |
| H | -0.9697160 | 2.9472019  | -4.7419628 |
| C | 1.9836750  | -2.2838856 | -3.3592239 |
| H | 0.8112132  | -4.0372563 | -5.1845704 |
| H | -0.5080049 | -2.9579972 | -5.7511539 |
| C | 0.1090368  | -0.7683353 | -4.1637564 |
| C | -2.4551820 | 2.9995459  | -2.4054853 |
| C | -1.4766814 | 1.0777923  | -3.7662293 |
| H | -4.1116745 | 0.8649981  | -4.6483921 |



|   |            |            |            |
|---|------------|------------|------------|
| H | -3.5685524 | 2.5392267  | -4.9584263 |
| C | 0.5820007  | -2.2108865 | -3.9908527 |
| C | -1.0918774 | -0.2780013 | -3.5749081 |
| C | -2.7307254 | 1.6691372  | -3.1235292 |
| H | 2.0231252  | -1.7269014 | -2.4037123 |
| H | -1.6457513 | 2.8865435  | -1.6619521 |
| H | 2.7592120  | -1.8530265 | -4.0256638 |
| H | 3.0007552  | 2.5749408  | -4.7037077 |
| H | -2.1721303 | 3.8091749  | -3.1105263 |
| H | 1.4518759  | 0.9014206  | -7.7825667 |
| H | -0.1175605 | -2.7208937 | -3.2985888 |
| H | -3.0745639 | 0.9534567  | -2.3492006 |
| H | 1.8030982  | -0.2898181 | -5.4142075 |
| H | 2.0935237  | 2.8630136  | -2.4629103 |

## int2-8-d-transmetall; COSMO

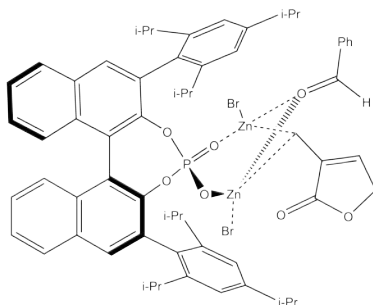

Energy(Hartree) = -11970.02798886

|   |            |            |            |
|---|------------|------------|------------|
| C | 0.7424287  | 2.3685827  | 1.5028035  |
| C | 2.1380751  | 2.4458263  | 1.5625470  |
| C | 2.7321151  | 3.7608682  | 1.6046798  |
| C | 4.1376151  | 3.9792645  | 1.4847808  |
| C | 1.8701626  | 4.9123682  | 1.7380960  |
| C | 2.4526861  | 6.2140180  | 1.8069288  |
| C | 0.4562880  | 4.7391594  | 1.7707821  |
| H | -0.1845144 | 5.6262946  | 1.8900822  |
| C | -0.1343246 | 3.4899311  | 1.6144700  |
| C | 3.5507061  | -0.9764686 | 0.4939836  |
| C | 4.5661242  | -1.1548523 | 1.4252042  |
| H | 5.2123742  | -2.0431242 | 1.3558163  |
| C | 4.7672651  | -0.2404327 | 2.4993679  |
| C | 5.7579303  | -0.4879027 | 3.4970235  |
| C | 3.9345903  | 0.9349930  | 2.6075634  |
| C | 4.0935640  | 1.7693509  | 3.7550277  |
| C | 2.9562024  | 1.1979477  | 1.5771573  |
| C | 2.7707883  | 0.2152534  | 0.5999005  |
| O | 0.1395288  | 1.1213074  | 1.3909263  |
| O | 1.8108303  | 0.4086221  | -0.3907472 |
| P | 0.2256875  | 0.3020438  | -0.0252256 |
| O | -0.4834622 | 1.0042050  | -1.1956687 |
| O | -0.2458114 | -1.1160494 | 0.3420144  |
| C | 3.8253523  | 6.3881738  | 1.7139598  |
| C | 4.6704705  | 5.2602129  | 1.5362589  |
| H | 1.7846455  | 7.0823431  | 1.9199793  |
| H | 4.2601887  | 7.3981819  | 1.7612646  |
| H | 4.8029030  | 3.1171149  | 1.3376166  |
| H | 5.7570814  | 5.4022424  | 1.4325512  |
| C | 5.0534877  | 1.4894257  | 4.7182068  |
| C | 5.9061350  | 0.3615744  | 4.5830363  |
| H | 3.4357343  | 2.6403662  | 3.8800471  |
| H | 5.1495265  | 2.1453929  | 5.5968993  |
| H | 6.6697896  | 0.1550465  | 5.3483130  |
| H | 6.3939375  | -1.3812410 | 3.3942194  |
| C | -2.3557880 | 3.8364993  | 0.4521571  |
| C | -1.6184085 | 3.3012652  | 1.5487324  |

|   |            |            |            |
|---|------------|------------|------------|
| C | -3.7537542 | 3.6732502  | 0.4324225  |
| C | -2.3003475 | 2.5854948  | 2.5746304  |
| C | -3.7002789 | 2.4536051  | 2.5026166  |
| C | -4.4514338 | 2.9948889  | 1.4460070  |
| H | -4.3265557 | 4.0676517  | -0.4209432 |
| C | -1.5799994 | 1.9820879  | 3.7804213  |
| H | -4.2186762 | 1.9100512  | 3.3074361  |
| C | -1.8002956 | 0.4608580  | 3.8798999  |
| H | -2.8695864 | 0.2097991  | 4.0404101  |
| H | -1.2303535 | 0.0392736  | 4.7334060  |
| H | -1.4566547 | -0.0541638 | 2.9611945  |
| C | -1.9856296 | 2.6979543  | 5.0827267  |
| H | -0.4918923 | 2.1487187  | 3.6516676  |
| H | -3.0656901 | 2.5634868  | 5.3007910  |
| H | -1.7890105 | 3.7874914  | 5.0190318  |
| H | -1.4160572 | 2.2948588  | 5.9456482  |
| C | -5.9712315 | 2.9035892  | 1.3886993  |
| C | -6.5342128 | 1.5747128  | 1.9143211  |
| H | -7.6277744 | 1.5219816  | 1.7366114  |
| H | -6.3763861 | 1.4604597  | 3.0072597  |
| H | -6.0658135 | 0.7040102  | 1.4125805  |
| C | -6.6020842 | 4.1012704  | 2.1267229  |
| H | -6.2468218 | 2.9847989  | 0.3151738  |
| H | -7.7085382 | 4.0836617  | 2.0401545  |
| H | -6.2394448 | 5.0643177  | 1.7142722  |
| H | -6.3424454 | 4.0784351  | 3.2062965  |
| C | -1.6984401 | 4.5803809  | -0.7113136 |
| C | -2.0365345 | 3.9472935  | -2.0725878 |
| H | -1.5709328 | 4.5254288  | -2.8970365 |
| H | -3.1274583 | 3.9020342  | -2.2644708 |
| H | -1.6418195 | 2.9158148  | -2.1338322 |
| C | -2.0687761 | 6.0757383  | -0.6848151 |
| H | -0.5994378 | 4.5062822  | -0.5862676 |
| H | -1.5442032 | 6.6244544  | -1.4941256 |
| H | -1.7980059 | 6.5477220  | 0.2819101  |
| H | -3.1596069 | 6.2203271  | -0.8313446 |
| H | 1.2865176  | -5.3906154 | -3.3309144 |
| H | 5.4812425  | -1.1980151 | -3.8667075 |
| H | 3.2130176  | -4.8888373 | 2.7870382  |
| C | 2.2099965  | -4.8771621 | -3.6779055 |
| H | 3.6778827  | 1.4327531  | -3.5830365 |
| H | 1.5387096  | -5.0770543 | -5.7464132 |
| H | 0.7329738  | -4.3384314 | 2.5041183  |
| C | 2.5453915  | -3.8340860 | -2.6176915 |
| C | 5.5205674  | -0.5779482 | -2.9465688 |
| C | 1.9192694  | -4.2894206 | -5.0647755 |
| H | 2.8323278  | -3.8658071 | -5.5326974 |
| C | 3.1239353  | -2.5939928 | -2.9318540 |
| C | 3.3883288  | -4.6375743 | 1.7203585  |
| H | 3.5005241  | -6.4114485 | -2.7655095 |
| C | 2.3117245  | -4.1211686 | -1.2603970 |
| C | 3.3214117  | -5.9431224 | -3.7542482 |
| H | 3.0551191  | -6.7460747 | -4.4730974 |
| H | 1.8478339  | -5.0863716 | -0.9999005 |
| C | 3.2236418  | 0.4468788  | -3.3531935 |
| H | 6.0060656  | 0.3845495  | -3.2102078 |
| H | 6.1696797  | -1.1020433 | -2.2157770 |
| C | 3.4680730  | -1.6553503 | -1.9407476 |
| C | 0.9186176  | -4.1399433 | 1.4287254  |
| C | 2.6349693  | -3.2210350 | -0.2293368 |
| H | 4.4235182  | -4.2523140 | 1.6245811  |
| H | 3.3301261  | -5.5799032 | 1.1355379  |
| C | 4.1117380  | -0.3386830 | -2.3713052 |
| C | 3.2305187  | -1.9735739 | -0.5760695 |
| C | 2.3485516  | -3.6163877 | 1.2194374  |
| H | 2.2172563  | 0.6235927  | -2.9256786 |
| H | 0.1705720  | -3.3988930 | 1.0916874  |
| H | 3.1011411  | -0.0923305 | -4.3157632 |
| H | 1.1600773  | -3.4826841 | -5.0176886 |
| H | 0.7379946  | -5.0928832 | 0.8882925  |
| H | 4.2773255  | -5.4873668 | -4.0878672 |

|    |            |            |            |   |            |            |            |
|----|------------|------------|------------|---|------------|------------|------------|
| H  | 4.2382855  | 0.2903916  | -1.4671297 | O | -0.5085160 | 1.0055977  | -1.1499724 |
| H  | 2.4481372  | -2.7030878 | 1.8405237  | O | -0.2626439 | -1.1149502 | 0.3888095  |
| H  | 3.3175081  | -2.3388602 | -3.9844011 | C | 3.8394819  | 6.3835458  | 1.6873099  |
| Zn | -2.1402724 | 0.2399429  | -1.9880018 | C | 4.6807273  | 5.2517513  | 1.5210421  |
| Br | -2.7429649 | 0.5690596  | -4.2020181 | H | 1.8011249  | 7.0854302  | 1.8849878  |
| C  | -1.2041930 | -6.8951743 | -3.0599686 | H | 4.2770538  | 7.3927378  | 1.7244940  |
| C  | -1.5926583 | -2.6636205 | -3.0816929 | H | 4.8059645  | 3.1063109  | 1.3433456  |
| C  | -1.1269224 | -6.1914457 | -1.8412183 | H | 5.7677702  | 5.3891758  | 1.4161441  |
| C  | -1.5279642 | -4.8187933 | -4.2719399 | C | 5.0760307  | 1.4891185  | 4.7132470  |
| C  | -1.4559231 | -4.1055249 | -3.0482541 | C | 5.9236991  | 0.3585528  | 4.5753822  |
| C  | -1.4042552 | -6.2115920 | -4.2742771 | H | 3.4551820  | 2.6420725  | 3.8825150  |
| C  | -1.2503224 | -4.8009331 | -1.8290838 | H | 5.1808973  | 2.1477860  | 5.5888383  |
| O  | -1.6123589 | -1.9282805 | -2.0674556 | H | 6.6922679  | 0.1516497  | 5.3355464  |
| H  | -1.1028103 | -7.9914100 | -3.0629147 | H | 6.3973129  | -1.3887339 | 3.3883051  |
| H  | -1.6818450 | -4.2683665 | -5.2131696 | C | -2.3488873 | 3.8248819  | 0.4467444  |
| H  | -0.9674254 | -6.7344396 | -0.8977536 | C | -1.6136477 | 3.3103370  | 1.5544164  |
| H  | -1.4592665 | -6.7699977 | -5.2202523 | C | -3.7461104 | 3.6566900  | 0.4258053  |
| H  | -1.1912541 | -4.2428159 | -0.8847410 | C | -2.2963649 | 2.6117114  | 2.5911687  |
| Br | -3.0082173 | -3.4585915 | 1.1844854  | C | -3.6953371 | 2.4752855  | 2.5178532  |
| Zn | -2.1401962 | -1.6282053 | 0.0359107  | C | -4.4446347 | 2.9949037  | 1.4494046  |
| H  | -7.0149615 | -1.8677222 | -2.3785242 | H | -4.3179249 | 4.0314265  | -0.4368048 |
| C  | -5.5826001 | -1.4272012 | -0.7880772 | C | -1.5767307 | 2.0333817  | 3.8095185  |
| C  | -6.8680310 | -1.1830172 | -1.5128293 | H | -4.2147510 | 1.9457013  | 3.3313946  |
| C  | -4.8251773 | -0.3034813 | -0.8393088 | C | -1.7976936 | 0.5150769  | 3.9421353  |
| C  | -3.4843476 | 0.0376418  | -0.2991398 | H | -2.8661359 | 0.2680744  | 4.1139784  |
| C  | -5.5999950 | 0.7196594  | -1.6084471 | H | -1.2239964 | 0.1101956  | 4.8011035  |
| O  | -6.7941267 | 0.1644540  | -1.9933388 | H | -1.4598912 | -0.0196288 | 3.0326807  |
| O  | -5.2976316 | 1.8695391  | -1.8632255 | C | -1.9811227 | 2.7786236  | 5.0954621  |
| H  | -7.7619212 | -1.2820404 | -0.8559294 | H | -0.4884649 | 2.1961541  | 3.6767212  |
| H  | -5.3265086 | -2.3772463 | -0.2962751 | H | -3.0617275 | 2.6526634  | 5.3155310  |
| H  | -1.6936785 | -2.1639833 | -4.0761785 | H | -1.7824059 | 3.8659426  | 5.0079183  |
| H  | -3.4651666 | -0.0582193 | 0.8141560  | H | -1.4140594 | 2.3936104  | 5.9682397  |
| H  | -3.3422914 | 1.1449697  | -0.3791792 | C | -5.9640293 | 2.8991380  | 1.3904996  |

### int2-8-d-transmetall

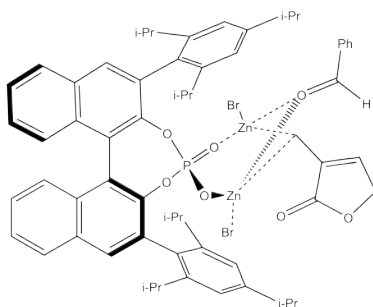

Energy(Hartree)= -11970.01402502

|   |            |            |            |   |           |            |            |
|---|------------|------------|------------|---|-----------|------------|------------|
| C | 0.7442281  | 2.3719017  | 1.5229463  | H | 1.5618076 | -5.0707236 | -5.7567567 |
| C | 2.1401327  | 2.4456768  | 1.5763411  | H | 0.7134321 | -4.3533517 | 2.4974241  |
| C | 2.7383524  | 3.7590692  | 1.6046427  | C | 2.5392871 | -3.8287392 | -2.6174904 |
| C | 4.1441360  | 3.9723850  | 1.4818529  | C | 5.4974377 | -0.5594902 | -2.9390470 |
| C | 1.8799510  | 4.9143472  | 1.7264268  | C | 1.9363294 | -4.2840244 | -5.0706456 |
| C | 2.4668455  | 6.2141397  | 1.7816474  | H | 2.8535805 | -3.8610616 | -5.5306247 |
| C | 0.4657421  | 4.7457890  | 1.7603340  | C | 3.1132267 | -2.5855207 | -2.9261037 |
| H | -0.1730865 | 5.6358380  | 1.8675189  | C | 3.3750930 | -4.6401507 | 1.7216289  |
| C | -0.1293885 | 3.4972033  | 1.6196689  | H | 3.5001409 | -6.4033735 | -2.7583943 |
| C | 3.5373935  | -0.9811740 | 0.5053678  | C | 2.3019565 | -4.1203132 | -1.2620683 |
| C | 4.5584421  | -1.1604351 | 1.4298548  | C | 3.3283086 | -5.9357055 | -3.7484939 |
| H | 5.2032273  | -2.0493027 | 1.3547856  | H | 3.0714070 | -6.7392053 | -4.4701951 |
| C | 4.7682907  | -0.2461202 | 2.5021428  | H | 1.8398152 | -5.0875054 | -1.0055698 |
| C | 5.7648991  | -0.4931075 | 3.4932418  | C | 3.1946904 | 0.4604863  | -3.3293109 |
| C | 3.9393626  | 0.9313954  | 2.6136940  |   |           |            |            |
| C | 4.1097073  | 1.7687065  | 3.7570642  |   |           |            |            |
| C | 2.9536552  | 1.1947236  | 1.5907914  |   |           |            |            |
| C | 2.7577644  | 0.2103727  | 0.6168261  |   |           |            |            |
| O | 0.1388683  | 1.1246876  | 1.4289017  |   |           |            |            |
| O | 1.7906409  | 0.4011637  | -0.3651706 |   |           |            |            |
| P | 0.2069609  | 0.3017030  | 0.0137499  |   |           |            |            |

|    |            |            |            |
|----|------------|------------|------------|
| H  | 5.9792886  | 0.4058174  | -3.1987440 |
| H  | 6.1509829  | -1.0867191 | -2.2147588 |
| C  | 3.4526484  | -1.6493552 | -1.9312647 |
| C  | 0.9042526  | -4.1543991 | 1.4232635  |
| C  | 2.6209793  | -3.2232495 | -0.2273044 |
| H  | 4.4086939  | -4.2499676 | 1.6306202  |
| H  | 3.3249290  | -5.5811199 | 1.1340217  |
| C  | 4.0902897  | -0.3281891 | -2.3568727 |
| C  | 3.2152120  | -1.9739220 | -0.5682820 |
| C  | 2.3319154  | -3.6232215 | 1.2195821  |
| H  | 2.1909496  | 0.6351447  | -2.8952762 |
| H  | 0.1526412  | -3.4184044 | 1.0836914  |
| H  | 3.0668242  | -0.0736684 | -4.2940003 |
| H  | 1.1784127  | -3.4757665 | -5.0307181 |
| H  | 0.7305172  | -5.1089550 | 0.8832281  |
| H  | 4.2864671  | -5.4778513 | -4.0719082 |
| H  | 4.2186039  | 0.2956560  | -1.4493907 |
| H  | 2.4248482  | -2.7104212 | 1.8425085  |
| H  | 3.3081560  | -2.3253377 | -3.9771415 |
| Zn | -2.1503303 | 0.2397785  | -1.9642325 |
| Br | -2.7576870 | 0.5039563  | -4.1791248 |
| C  | -1.2233697 | -6.8947631 | -3.1221771 |
| C  | -1.5570122 | -2.6553589 | -3.0714485 |
| C  | -1.1499268 | -6.2128530 | -1.8919783 |
| C  | -1.5099384 | -4.7939464 | -4.2999881 |
| C  | -1.4389653 | -4.1024662 | -3.0649041 |
| C  | -1.4032027 | -6.1878389 | -4.3260175 |
| C  | -1.2545427 | -4.8206161 | -1.8566736 |
| O  | -1.5667491 | -1.9425985 | -2.0447401 |
| H  | -1.1364513 | -7.9921454 | -3.1435196 |
| H  | -1.6479532 | -4.2251572 | -5.2329660 |
| H  | -1.0098174 | -6.7714832 | -0.9545608 |
| H  | -1.4563236 | -6.7289677 | -5.2821866 |
| H  | -1.2025182 | -4.2796292 | -0.9017813 |
| Br | -3.0134351 | -3.5188684 | 1.1330450  |
| Zn | -2.1450517 | -1.6516085 | 0.0535862  |
| H  | -6.9924184 | -1.8808758 | -2.4311244 |
| C  | -5.5811583 | -1.4647778 | -0.8134528 |
| C  | -6.8599247 | -1.2111125 | -1.5505309 |
| C  | -4.8306348 | -0.3363374 | -0.8372929 |
| C  | -3.4983750 | 0.0045455  | -0.2786533 |
| C  | -5.6041122 | 0.6995799  | -1.5956498 |
| O  | -6.7914280 | 0.1425158  | -2.0032211 |
| O  | -5.3049884 | 1.8546636  | -1.8185064 |
| H  | -7.7617303 | -1.3305684 | -0.9067529 |
| H  | -5.3213906 | -2.4205441 | -0.3341767 |
| H  | -1.6562940 | -2.1326630 | -4.0556973 |
| H  | -3.4894353 | -0.1062549 | 0.8334913  |
| H  | -3.3601638 | 1.1133404  | -0.3456349 |

### int3-8-d-transmetall; COSMO

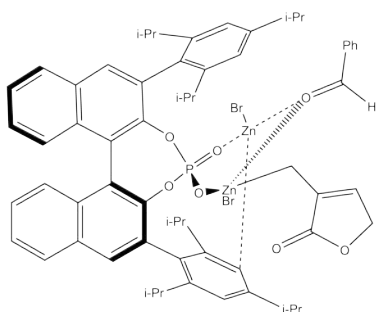

Energy(Hartree) = -11970.02827662

|    |            |           |            |
|----|------------|-----------|------------|
| Zn | 2.2204522  | 1.1522520 | 1.3890046  |
| Br | 4.5240430  | 0.7750078 | 1.1059304  |
| H  | 3.0677532  | 6.2740772 | 0.4995524  |
| Br | -1.1932240 | 3.8908882 | -2.0029915 |
| H  | 0.5899536  | 2.2893702 | 2.8694783  |
| Zn | 0.0850389  | 1.9172146 | -1.9820602 |

|   |            |            |            |
|---|------------|------------|------------|
| C | 1.3830264  | 4.9302211  | 0.9092743  |
| C | 2.3354963  | 6.0147501  | 1.2994365  |
| C | 1.5116562  | 3.8797896  | 1.7728405  |
| C | 0.8761818  | 2.5653356  | 1.8334576  |
| C | 2.5934450  | 4.2498475  | 2.7411330  |
| O | 3.0572059  | 5.5074671  | 2.4312959  |
| O | 3.0431794  | 3.6036315  | 3.6685586  |
| H | 1.8231316  | 6.9591668  | 1.5932992  |
| H | -0.0051104 | 2.4758003  | 1.1696717  |
| H | 0.6670911  | 5.0113624  | 0.0784529  |
| C | 2.5473244  | 6.2591341  | -3.2168403 |
| C | 2.2216152  | 5.0406724  | -2.6176340 |
| C | 3.1536535  | 4.4054050  | -1.7613793 |
| C | 4.4076774  | 5.0185354  | -1.5097900 |
| C | 4.7336502  | 6.2330324  | -2.1258464 |
| C | 3.8045375  | 6.8519842  | -2.9803853 |
| H | 1.8166742  | 6.7590925  | -3.8702978 |
| H | 1.2282360  | 4.5928942  | -2.7673501 |
| C | 2.9118131  | 3.1290046  | -1.1011421 |
| H | 5.1224471  | 4.5271388  | -0.8304757 |
| H | 5.7101844  | 6.7025134  | -1.9356949 |
| H | 4.0562136  | 7.8103723  | -3.4601749 |
| O | 1.9804211  | 2.3128628  | -1.2926306 |
| C | -1.2171989 | -2.4750470 | 1.4724795  |
| C | -1.2240667 | -3.6729036 | 0.7407489  |
| C | -1.0855498 | -4.9084973 | 1.4735700  |
| C | -0.8813667 | -6.1692787 | 0.8357051  |
| C | -1.1141406 | -4.8707292 | 2.9162736  |
| C | -1.0136183 | -6.0923862 | 3.6485607  |
| C | -1.1969119 | -3.6179289 | 3.5876012  |
| H | -1.2187521 | -3.6086553 | 4.6879014  |
| C | -1.1926011 | -2.4082693 | 2.9000861  |
| C | -0.6840983 | -2.5661932 | -2.8964769 |
| C | -1.5521030 | -3.3983182 | -3.5899537 |
| H | -1.6572282 | -3.2906823 | -4.6806283 |
| C | -2.3965137 | -4.3212322 | -2.9048709 |
| C | -3.3462333 | -5.1097411 | -3.6218667 |
| C | -2.3676856 | -4.3866845 | -1.4605496 |
| C | -3.3616149 | -5.1755134 | -0.8065985 |
| C | -1.3644533 | -3.6310421 | -0.7436226 |
| C | -0.5523986 | -2.7713890 | -1.4887458 |
| O | -1.2762472 | -1.2603423 | 0.7923868  |
| O | 0.4594757  | -2.0677088 | -0.8568783 |
| P | 0.0971553  | -0.7458421 | 0.0541293  |
| O | 1.2905141  | -0.5983488 | 0.9886479  |
| O | -0.3654065 | 0.4446713  | -0.7956590 |
| C | -0.8492920 | -7.3044930 | 2.9953056  |
| C | -0.7651887 | -7.3371134 | 1.5773871  |
| H | -1.0497351 | -6.0490604 | 4.7484452  |
| H | -0.7646299 | -8.2380172 | 3.5721694  |
| H | -0.8029415 | -6.2091345 | -0.2596338 |
| H | -0.5997935 | -8.2952980 | 1.0614743  |
| C | -4.2862716 | -5.9139390 | -1.5331122 |
| C | -4.2684905 | -5.9005002 | -2.9530306 |
| H | -3.3967368 | -5.1909876 | 0.2909448  |
| H | -5.0432917 | -6.5103273 | -1.0013647 |
| H | -4.9996566 | -6.4982971 | -3.5181268 |
| H | -3.3461172 | -5.0592250 | -4.7221309 |
| C | 0.0227988  | -0.7739731 | 4.4018988  |
| C | -1.1249335 | -1.0933916 | 3.6150095  |
| C | 0.0341731  | 0.4355446  | 5.1206351  |
| C | -2.2039507 | -0.1686284 | 3.5395747  |
| C | -2.1356819 | 1.0272545  | 4.2801385  |
| C | -1.0378078 | 1.3456691  | 5.0961953  |
| H | 0.9125738  | 0.6763390  | 5.7419852  |
| C | -3.4731071 | -0.4468018 | 2.7344729  |
| H | -2.9882386 | 1.7208461  | 4.2309324  |
| C | -3.7286495 | 0.6394183  | 1.6735068  |
| H | -3.9462465 | 1.6227594  | 2.1402616  |
| H | -4.6020385 | 0.3711111  | 1.0434121  |
| H | -2.8512054 | 0.7617596  | 1.0090422  |

|   |            |            |            |
|---|------------|------------|------------|
| C | -4.6892259 | -0.6303709 | 3.6620627  |
| H | -3.3367640 | -1.4060325 | 2.1971975  |
| H | -4.9087352 | 0.2964182  | 4.2322012  |
| H | -4.5150977 | -1.4430131 | 4.3965440  |
| H | -5.5956984 | -0.8857475 | 3.0746612  |
| C | -0.9710501 | 2.6207588  | 5.9335368  |
| C | -0.1414107 | 3.7137385  | 5.2317532  |
| H | -0.0513079 | 4.6117319  | 5.8779352  |
| H | -0.6256092 | 4.0249814  | 4.2822497  |
| H | 0.8821819  | 3.3668376  | 4.9884256  |
| C | -2.3479638 | 3.1599067  | 6.3456749  |
| H | -0.4265882 | 2.3468617  | 6.8652069  |
| H | -2.2343332 | 3.9996860  | 7.0608401  |
| H | -2.9700295 | 2.3785788  | 6.8279167  |
| H | -2.9117125 | 3.5523017  | 5.4733443  |
| C | 1.2330106  | -1.7020716 | 4.5295467  |
| C | 2.5548465  | -1.0059587 | 4.1650932  |
| H | 3.4111637  | -1.6982721 | 4.2987799  |
| H | 2.7520065  | -0.1083293 | 4.7859277  |
| H | 2.5593586  | -0.6998419 | 3.1021672  |
| C | 1.3079585  | -2.3165943 | 5.9410212  |
| H | 1.1026447  | -2.5331037 | 3.8082118  |
| H | 2.1458830  | -3.0407929 | 6.0101299  |
| H | 0.3720965  | -2.8480414 | 6.2088178  |
| H | 1.4748833  | -1.5334454 | 6.7099337  |
| H | 1.1401795  | 3.2542468  | -4.5156798 |
| H | 3.5046800  | -2.1677027 | -5.1096537 |
| H | -4.1129168 | -0.4686073 | -5.0757362 |
| C | 1.6454347  | -2.3903910 | -5.0024265 |
| H | 4.0105628  | -2.8376210 | -2.0018211 |
| H | 3.4657050  | 3.5679507  | -5.2207130 |
| H | -4.1706633 | 0.6090749  | -2.7684705 |
| C | 1.0958028  | 1.1302524  | -4.3427304 |
| C | 2.8890990  | -2.9237118 | -4.5784430 |
| C | 3.1603672  | 2.5672000  | -4.8569979 |
| H | 3.7143536  | 1.8136459  | -5.4540675 |
| C | 1.9003923  | 0.0224445  | -4.0252512 |
| C | -3.0131197 | -0.3303024 | -5.1126026 |
| H | 0.1370786  | 2.3528160  | -6.6181000 |
| C | -0.3094595 | 1.0019573  | -4.1468585 |
| C | 1.2361238  | 2.4123081  | -6.4908035 |
| H | 1.5861480  | 3.3473745  | -6.9734493 |
| H | -0.9645471 | 1.8324179  | -4.4591269 |
| C | 3.4076377  | -1.9495344 | -2.2795935 |
| H | 3.5396719  | -3.7950786 | -4.3602487 |
| H | 2.0889053  | -3.2560138 | -5.2705403 |
| C | 1.3557739  | -1.1982135 | -3.5816442 |
| C | -3.0762671 | 0.7785495  | -2.8239499 |
| C | -0.9044448 | -0.2268363 | -3.7548907 |
| H | -2.5835707 | -1.1501433 | -5.7235021 |
| H | -2.8104247 | 0.6247352  | -5.6413334 |
| C | 2.3024298  | -2.3515988 | -3.2727931 |
| C | -0.0558857 | -1.3353643 | -3.4721693 |
| C | -2.4273345 | -0.3146128 | -3.6862972 |
| H | 2.9900199  | -1.5194686 | -1.3485910 |
| H | -2.6767635 | 0.7610837  | -1.7907037 |
| H | 4.1054234  | -1.2038753 | -2.7140012 |
| H | 3.4933494  | 2.4779058  | -3.8053902 |
| H | -2.9203828 | 1.7972204  | -3.2330027 |
| H | 1.6891707  | 1.5557453  | -7.0319154 |
| H | 1.7044856  | -3.1575254 | -2.8022710 |
| H | -2.6822461 | -1.2827150 | -3.2154240 |
| H | 2.9903412  | 0.1009534  | -4.1381681 |
| H | 3.6990054  | 2.8131789  | -0.3711112 |

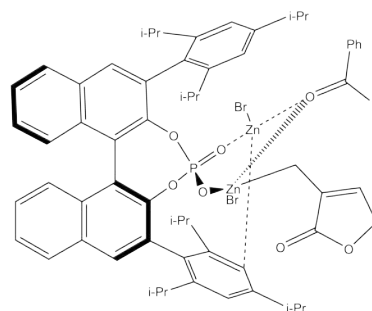

Energy(Hartree)= -11970.01353924

|    |            |            |            |
|----|------------|------------|------------|
| Zn | 2.2620662  | 1.1267789  | 1.3211820  |
| Br | 4.5452012  | 0.7775868  | 0.9599684  |
| H  | 3.1100023  | 6.2443226  | 0.5430357  |
| Br | -1.1982724 | 3.8941499  | -2.0423539 |
| H  | 0.6791470  | 2.2057821  | 2.8830542  |
| Zn | 0.0946705  | 1.9404842  | -1.9416958 |
| C  | 1.4349344  | 4.8726715  | 0.9133850  |
| C  | 2.3745784  | 5.9597333  | 1.3318987  |
| C  | 1.5454056  | 3.8224161  | 1.7852595  |
| C  | 0.9072636  | 2.5179314  | 1.8432874  |
| C  | 2.6211820  | 4.1881573  | 2.7690524  |
| O  | 3.0902750  | 5.4456965  | 2.4611099  |
| O  | 3.0505134  | 3.5393757  | 3.7001316  |
| H  | 1.8452719  | 6.8929150  | 1.6348079  |
| H  | 0.0040728  | 2.4307723  | 1.2104507  |
| H  | 0.7108610  | 4.9657826  | 0.0908851  |
| C  | 2.5367770  | 6.2731087  | -3.2672380 |
| C  | 2.1960033  | 5.0837527  | -2.6189649 |
| C  | 3.1153874  | 4.4767159  | -1.7300616 |
| C  | 4.3718471  | 5.0917320  | -1.4966868 |
| C  | 4.7135319  | 6.2748063  | -2.1637694 |
| C  | 3.7971251  | 6.8652737  | -3.0506366 |
| H  | 1.8124763  | 6.7502524  | -3.9447643 |
| H  | 1.1982902  | 4.6400924  | -2.7540324 |
| C  | 2.8669096  | 3.2230561  | -1.0240336 |
| H  | 5.0777716  | 4.6224128  | -0.7927512 |
| H  | 5.6938627  | 6.7421680  | -1.9876108 |
| H  | 4.0608780  | 7.7995120  | -3.5699603 |
| O  | 1.9700757  | 2.3691125  | -1.2359383 |
| C  | -1.2230509 | -2.4779589 | 1.4641394  |
| C  | -1.2354627 | -3.6778688 | 0.7359688  |
| C  | -1.0878796 | -4.9111151 | 1.4706415  |
| C  | -0.8921357 | -6.1738305 | 0.8345060  |
| C  | -1.0962513 | -4.8687596 | 2.9133719  |
| C  | -0.9845377 | -6.0879704 | 3.6471571  |
| C  | -1.1722227 | -3.6141283 | 3.5815554  |
| H  | -1.1790473 | -3.6000190 | 4.6820088  |
| C  | -1.1816939 | -2.4064747 | 2.8911325  |
| C  | -0.7080403 | -2.5767243 | -2.9043709 |
| C  | -1.5815987 | -3.4066574 | -3.5933134 |
| H  | -1.6902599 | -3.2988428 | -4.6838550 |
| C  | -2.4247952 | -4.3280837 | -2.9049327 |
| C  | -3.3778666 | -5.1165860 | -3.6165756 |
| C  | -2.3893396 | -4.3939871 | -1.4607952 |
| C  | -3.3791932 | -5.1839764 | -0.8025699 |
| C  | -1.3836301 | -3.6386732 | -0.7478333 |
| C  | -0.5726998 | -2.7808150 | -1.4963784 |
| O  | -1.2886140 | -1.2653407 | 0.7805185  |
| O  | 0.4405061  | -2.0785565 | -0.8693156 |
| P  | 0.0859825  | -0.7543620 | 0.0413084  |
| O  | 1.2789089  | -0.6057330 | 0.9726931  |
| O  | -0.3747667 | 0.4343054  | -0.8142250 |
| C  | -0.8294922 | -7.3019089 | 2.9961661  |
| C  | -0.7657989 | -7.3390080 | 1.5779288  |
| H  | -1.0045482 | -6.0408006 | 4.7472772  |

### int3-8-d-transmetall

|   |            |            |            |   |            |            |            |
|---|------------|------------|------------|---|------------|------------|------------|
| H | -0.7361846 | -8.2333142 | 3.5750088  | H | -2.5858482 | -1.0494751 | -5.8015195 |
| H | -0.8290257 | -6.2163492 | -0.2616147 | H | -2.8026961 | 0.7203567  | -5.6358330 |
| H | -0.6076161 | -8.2986730 | 1.0626143  | C | 2.2816367  | -2.3761378 | -3.2579009 |
| C | -4.3064015 | -5.9227218 | -1.5246228 | C | -0.0723367 | -1.3493275 | -3.4787347 |
| C | -4.2960687 | -5.9080758 | -2.9440589 | C | -2.4378988 | -0.3169852 | -3.7252186 |
| H | -3.4066625 | -5.1999375 | 0.2951368  | H | 2.9699709  | -1.5746049 | -1.3201876 |
| H | -5.0597411 | -6.5205147 | -0.9893444 | H | -2.6917773 | 0.6584373  | -1.7772308 |
| H | -5.0294343 | -6.5060001 | -3.5060648 | H | 4.0898518  | -1.2445463 | -2.6768904 |
| H | -3.3830896 | -5.0658977 | -4.7168472 | H | 3.4823128  | 2.4529188  | -3.6935750 |
| C | 0.0320906  | -0.7527079 | 4.3757206  | H | -2.9074556 | 1.7742093  | -3.1610504 |
| C | -1.1189795 | -1.0888385 | 3.6009333  | H | 1.7597302  | 1.5791576  | -6.9762908 |
| C | 0.0348156  | 0.4597853  | 5.0888028  | H | 1.6765849  | -3.1826947 | -2.7975956 |
| C | -2.2097890 | -0.1779133 | 3.5322166  | H | -2.7051418 | -1.3053834 | -3.3064929 |
| C | -2.1494051 | 1.0213957  | 4.2672924  | H | 2.9881176  | 0.0873492  | -4.0698230 |
| C | -1.0480851 | 1.3568424  | 5.0708517  | H | 3.6430462  | 2.9403879  | -0.2703759 |
| H | 0.9168064  | 0.7144682  | 5.6993535  |   |            |            |            |
| C | -3.4829774 | -0.4742571 | 2.7399996  |   |            |            |            |
| H | -3.0109462 | 1.7038221  | 4.2231142  |   |            |            |            |
| C | -3.7619725 | 0.6049555  | 1.6780343  |   |            |            |            |
| H | -3.9894931 | 1.5868947  | 2.1427441  |   |            |            |            |
| H | -4.6362328 | 0.3234793  | 1.0550701  |   |            |            |            |
| H | -2.8916074 | 0.7383719  | 1.0065928  |   |            |            |            |
| C | -4.6875062 | -0.6706841 | 3.6797215  |   |            |            |            |
| H | -3.3399828 | -1.4333953 | 2.2042508  |   |            |            |            |
| H | -4.9126547 | 0.2540327  | 4.2508151  |   |            |            |            |
| H | -4.4960481 | -1.4790288 | 4.4143586  |   |            |            |            |
| H | -5.5970817 | -0.9381019 | 3.1026056  |   |            |            |            |
| C | -0.9871368 | 2.6361739  | 5.9021468  |   |            |            |            |
| C | -0.1215167 | 3.7119169  | 5.2176192  |   |            |            |            |
| H | -0.0383270 | 4.6141029  | 5.8587176  |   |            |            |            |
| H | -0.5728783 | 4.0209411  | 4.2514779  |   |            |            |            |
| H | 0.9045576  | 3.3508709  | 5.0081645  |   |            |            |            |
| C | -2.3660315 | 3.1985511  | 6.2727707  |   |            |            |            |
| H | -0.4737540 | 2.3595604  | 6.8508246  |   |            |            |            |
| H | -2.2598235 | 4.0416879  | 6.9849357  |   |            |            |            |
| H | -3.0137850 | 2.4309573  | 6.7428270  |   |            |            |            |
| H | -2.8990060 | 3.5938600  | 5.3826034  |   |            |            |            |
| C | 1.2545780  | -1.6654943 | 4.4983850  |   |            |            |            |
| C | 2.5663663  | -0.9594318 | 4.1148969  |   |            |            |            |
| H | 3.4340580  | -1.6315371 | 4.2743280  |   |            |            |            |
| H | 2.7478759  | -0.0364485 | 4.7022024  |   |            |            |            |
| H | 2.5708940  | -0.6934939 | 3.0413669  |   |            |            |            |
| C | 1.3481509  | -2.2654245 | 5.9151506  |   |            |            |            |
| H | 1.1262298  | -2.5050367 | 3.7865137  |   |            |            |            |
| H | 2.1917906  | -2.9829071 | 5.9837786  |   |            |            |            |
| H | 0.4186903  | -2.8001519 | 6.1985054  |   |            |            |            |
| H | 1.5167173  | -1.4743149 | 6.6753034  |   |            |            |            |
| H | 1.1520828  | 3.2469136  | -4.4527192 |   |            |            |            |
| H | 3.4900730  | -2.1832140 | -5.0898732 |   |            |            |            |
| H | -4.1148721 | -0.3886898 | -5.1321921 |   |            |            |            |
| C | 1.6667362  | 2.3878353  | -4.9380179 |   |            |            |            |
| H | 3.9845986  | -2.8866518 | -1.9894954 |   |            |            |            |
| H | 3.4949864  | 3.5653862  | -5.0913639 |   |            |            |            |
| H | -4.1792658 | 0.5805095  | -2.7739128 |   |            |            |            |
| C | 1.0989635  | 1.1211938  | -4.3050902 |   |            |            |            |
| C | 2.8684150  | -2.9401670 | -4.5671398 |   |            |            |            |
| C | 3.1778218  | 2.5597749  | -4.7520292 |   |            |            |            |
| H | 3.7457050  | 1.8144276  | -5.3464971 |   |            |            |            |
| C | 1.8959760  | 0.0087704  | -3.9821263 |   |            |            |            |
| C | -3.0138297 | -0.2572794 | -5.1537730 |   |            |            |            |
| H | 0.1996803  | 2.3721222  | -6.5911334 |   |            |            |            |
| C | -0.3088978 | 0.9903295  | -4.1461629 |   |            |            |            |
| C | 1.2950970  | 2.4295853  | -6.4353378 |   |            |            |            |
| H | 1.6575180  | 3.3696259  | -6.8989823 |   |            |            |            |
| H | -0.9561370 | 1.8295423  | -4.4506200 |   |            |            |            |
| C | 3.3859545  | -1.9926472 | -2.2569586 |   |            |            |            |
| H | 3.5137050  | -3.8172847 | -4.3564340 |   |            |            |            |
| H | 2.0689136  | -3.2608691 | -5.2654281 |   |            |            |            |
| C | 1.3419736  | -1.2152842 | -3.5631944 |   |            |            |            |
| C | -3.0820656 | 0.7367966  | -2.8108184 |   |            |            |            |
| C | -0.9132987 | -0.2380937 | -3.7733710 |   |            |            |            |

### 7.2.3.3 to 15n-ma

#### TS1-8-n; COSMO

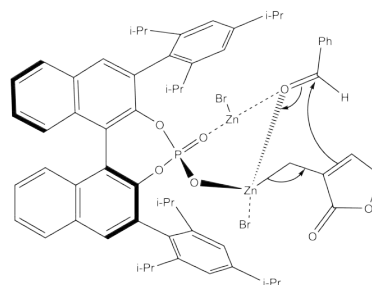

Energy(Hartree)= -11970.02266224

|   |            |            |            |
|---|------------|------------|------------|
| C | 0.8822503  | 2.3788204  | 1.6307008  |
| C | 2.2615397  | 2.5760639  | 1.7271584  |
| C | 2.7404761  | 3.9394131  | 1.7556874  |
| C | 4.1252637  | 4.2766340  | 1.6815199  |
| C | 1.7805530  | 5.0173058  | 1.8284318  |
| C | 2.2475402  | 6.3637770  | 1.9095933  |
| C | 0.3858883  | 4.7336563  | 1.7382336  |
| H | -0.3265402 | 5.5728327  | 1.7402792  |
| C | -0.0791481 | 3.4361776  | 1.5706411  |
| C | 3.8865021  | -0.7560401 | 0.6942990  |
| C | 4.9403847  | -0.8346186 | 1.5970630  |
| H | 5.6382298  | -1.6837160 | 1.5339945  |
| C | 5.1041730  | 0.1134088  | 2.6468314  |
| C | 6.1336593  | -0.0424226 | 3.6236686  |
| C | 4.1825908  | 1.2187714  | 2.7613744  |
| C | 4.2932031  | 2.0705301  | 3.9019591  |
| C | 3.1683318  | 1.3936644  | 1.7472280  |
| C | 3.0313767  | 0.3856533  | 0.7823843  |
| O | 0.3850610  | 1.0806271  | 1.6045930  |
| O | 2.0445339  | 0.4940168  | -0.1985430 |
| P | 0.4751948  | 0.2485025  | 0.1875828  |
| O | -0.3106034 | 0.9264562  | -0.9456896 |
| O | 0.1309438  | -1.1949484 | 0.5484614  |
| C | 3.6036276  | 6.6523518  | 1.8755629  |
| C | 4.5460606  | 5.5985683  | 1.7401436  |
| H | 1.5045554  | 7.1738148  | 1.9787627  |
| H | 3.9498091  | 7.6955699  | 1.9319490  |
| H | 4.8664734  | 3.4738641  | 1.5684639  |
| H | 5.6200700  | 5.8304777  | 1.6756334  |
| C | 5.2926932  | 1.8794595  | 4.8464680  |
| C | 6.2345622  | 0.8264409  | 4.6996185  |
| H | 3.5660978  | 2.8828676  | 4.0382246  |
| H | 5.3502716  | 2.5469148  | 5.7198782  |
| H | 7.0285821  | 0.6905430  | 5.4496353  |

|   |            |            |            |    |            |            |            |
|---|------------|------------|------------|----|------------|------------|------------|
| H | 6.8370238  | -0.8829242 | 3.5145337  | H  | 0.3675350  | -4.0871051 | -3.4113808 |
| C | -1.9418568 | 3.4060939  | -0.1208537 | H  | 1.2648130  | -4.8306708 | 1.5478733  |
| C | -1.4728470 | 3.0645044  | 1.1767560  | H  | 3.9908840  | -4.6409694 | -4.5897027 |
| C | -3.1736708 | 2.8468360  | -0.5746281 | H  | 4.3798974  | 0.4094589  | -1.3936097 |
| C | -2.2549693 | 2.2185317  | 2.0170261  | H  | 3.1630970  | -2.4960240 | 2.2479066  |
| C | -3.4706516 | 1.7055886  | 1.5400655  | H  | 3.3930141  | -2.4243295 | -3.6623972 |
| C | -3.9717605 | 2.0169268  | 0.2609822  | Zn | -2.1765998 | 0.9104619  | -1.5239138 |
| H | -3.5834012 | 3.1971878  | -1.5347272 | Br | -2.7212414 | 0.9567509  | -3.8036137 |
| C | -1.8450612 | 1.9214003  | 3.4552874  | C  | -3.7508862 | -3.6004569 | -5.1483061 |
| H | -4.0670230 | 1.0508575  | 2.1916100  | C  | -3.8097431 | -1.4957609 | -1.4297003 |
| C | -1.8881619 | 0.4231814  | 3.7969805  | C  | -2.5409222 | -3.2964918 | -4.5004466 |
| H | -2.9208304 | 0.0204101  | 3.7633438  | C  | -4.9908912 | -2.5436632 | -3.3483831 |
| H | -1.4950025 | 0.2559390  | 4.8202747  | C  | -3.7773465 | -2.2570444 | -2.6716534 |
| H | -1.2648480 | -0.1594650 | 3.0912880  | C  | -4.9775243 | -3.2157823 | -4.5731287 |
| C | -2.7227922 | 2.7464664  | 4.4186095  | C  | -2.5491686 | -2.6288164 | -3.2721944 |
| H | -0.8010588 | 2.2695830  | 3.5887537  | O  | -2.7296374 | -1.0212887 | -0.8676906 |
| H | -3.7893201 | 2.4490088  | 4.3404234  | H  | -3.7395381 | -4.1253462 | -6.1158929 |
| H | -2.6556438 | 3.8315531  | 4.1998572  | H  | -5.9483066 | -2.2074735 | -2.9209786 |
| H | -2.4018288 | 2.5853762  | 5.4681608  | H  | -1.5815034 | -3.5768864 | -4.9598537 |
| C | -5.3795851 | 1.5601001  | -0.1148735 | H  | -5.9232589 | -3.4294283 | -5.0934604 |
| C | -6.4091053 | 2.1879453  | 0.8487168  | H  | -1.6059350 | -2.3700851 | -2.7750932 |
| H | -7.4290520 | 1.8349069  | 0.5948946  | Br | -1.0457532 | -4.4188588 | -0.8222164 |
| H | -6.3969063 | 3.2950079  | 0.7708444  | Zn | -1.4635947 | -2.3243409 | 0.2363121  |
| H | -6.2102156 | 1.9088356  | 1.9014436  | H  | -6.5235501 | -2.5392129 | -0.9361209 |
| C | -5.7740779 | 1.8143130  | -1.5728713 | H  | -2.4078730 | -3.7911037 | 1.8407816  |
| H | -5.4188169 | 0.4643692  | 0.0693121  | C  | -4.6661102 | -3.2205953 | 0.0635365  |
| H | -6.7699126 | 1.3729769  | -1.7768565 | C  | -6.1273850 | -2.8858633 | 0.0405546  |
| H | -5.0539616 | 1.3775970  | -2.2943673 | H  | -4.2272759 | -4.0536912 | -0.5036182 |
| H | -5.8465350 | 2.9003124  | -1.7908128 | C  | -4.1074150 | -2.6443142 | 1.2033864  |
| C | -1.2125626 | 4.4028213  | -1.0180166 | C  | -2.8198450 | -2.7663373 | 1.7944345  |
| C | -0.9989730 | 3.9250498  | -2.4606041 | O  | -5.1329212 | -1.6793122 | 1.7262602  |
| H | -0.4295344 | 4.6898562  | -3.0266340 | C  | -6.2864911 | -1.8225759 | 0.9990129  |
| H | -1.9494590 | 3.7528507  | -3.0043768 | O  | -5.0479554 | -0.8853161 | 2.6443044  |
| H | -0.4163845 | 2.9830364  | -2.4881794 | H  | -6.7570521 | -3.7467719 | 0.3614983  |
| C | -1.9507792 | 5.7568671  | -0.9801337 | H  | -2.6619899 | -2.1622807 | 2.7027276  |
| H | -0.2066104 | 4.5614376  | -0.5845827 | H  | -4.7656356 | -0.9888248 | -1.1855621 |
| H | -1.3895365 | 6.5190476  | -1.5583864 |    |            |            |            |
| H | -2.0723688 | 6.1304752  | 0.0569368  |    |            |            |            |
| H | -2.9641377 | 5.6726188  | -1.4258389 |    |            |            |            |
| H | 1.9716506  | -5.7708204 | -2.5320342 |    |            |            |            |
| H | 5.5751492  | -1.2077949 | -3.7325260 |    |            |            |            |
| H | 3.9996582  | -4.6505883 | 3.1805437  |    |            |            |            |
| C | 2.3690417  | -4.9227356 | -3.1312547 |    |            |            |            |
| H | 3.6783214  | 1.3667215  | -3.5594731 |    |            |            |            |
| H | 0.8714150  | -5.2287714 | -4.7055640 |    |            |            |            |
| H | 1.5283220  | -4.1107589 | 3.1677417  |    |            |            |            |
| C | 2.8081263  | -3.8530300 | -2.1397510 |    |            |            |            |
| C | 5.6310284  | -0.5145973 | -2.8670783 |    |            |            |            |
| C | 1.2240292  | -4.4215342 | -4.0299180 |    |            |            |            |
| H | 1.5491464  | -3.5710220 | -4.6655267 |    |            |            |            |
| C | 3.3040373  | -2.6130550 | -2.5803911 |    |            |            |            |
| C | 4.0444086  | -4.4496494 | 2.0897909  |    |            |            |            |
| H | 4.3612651  | -5.8396748 | -3.3115419 |    |            |            |            |
| C | 2.7218743  | -4.0703290 | -0.7561774 |    |            |            |            |
| C | 3.5540221  | -5.4464459 | -3.9623913 |    |            |            |            |
| H | 3.2311969  | -6.2619928 | -4.6426035 |    |            |            |            |
| H | 2.3242333  | -5.0338024 | -0.4007479 |    |            |            |            |
| C | 3.2772223  | 0.3838876  | -3.2358323 |    |            |            |            |
| H | 6.0615525  | 0.4426638  | -3.2282595 |    |            |            |            |
| H | 6.3355610  | -0.9534511 | -2.1314135 |    |            |            |            |
| C | 3.6823077  | -1.5986323 | -1.6855318 |    |            |            |            |
| C | 1.5644503  | -3.9039388 | 2.0779624  |    |            |            |            |
| C | 3.0916940  | -3.0929957 | 0.1871619  |    |            |            |            |
| H | 5.0658476  | -4.0906387 | 1.8480373  |    |            |            |            |
| H | 3.8989768  | -5.4152796 | 1.5615714  |    |            |            |            |
| C | 4.2404758  | -0.2901929 | -2.2428427 |    |            |            |            |
| C | 3.5722533  | -1.8389896 | -0.2871846 |    |            |            |            |
| C | 2.9700421  | -3.4253543 | 1.6758319  |    |            |            |            |
| H | 2.2840577  | 0.5519839  | -2.7752050 |    |            |            |            |
| H | 0.8089744  | -3.1298279 | 1.8457417  |    |            |            |            |
| H | 3.1343963  | -0.2303013 | -4.1492788 |    |            |            |            |

### TS1-8-n

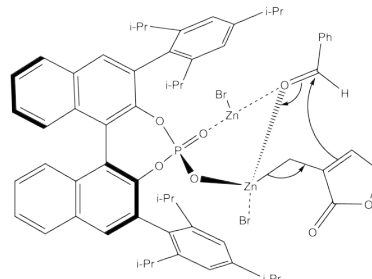

Energy(Hartree)= -11970.01124035  
number of imaginary frequencies: 1

|   |            |            |           |
|---|------------|------------|-----------|
| C | 0.8839779  | 2.3855105  | 1.6294113 |
| C | 2.2635898  | 2.5821843  | 1.7256340 |
| C | 2.7433378  | 3.9450619  | 1.7542516 |
| C | 4.1283228  | 4.2808510  | 1.6809321 |
| C | 1.7847853  | 5.0239462  | 1.8266133 |
| C | 2.2538668  | 6.3692096  | 1.9079704 |
| C | 0.3902677  | 4.7408798  | 1.7366890 |
| H | -0.3223197 | 5.5800605  | 1.7378038 |
| C | -0.0764849 | 3.4440945  | 1.5694664 |
| C | 3.8798325  | -0.7542094 | 0.6940279 |
| C | 4.9325485  | -0.8352933 | 1.5976903 |
| H | 5.6256120  | -1.6883610 | 1.5354554 |
| C | 5.1003737  | 0.1131683  | 2.6460370 |
| C | 6.1289298  | -0.0444322 | 3.6228756 |
| C | 4.1830325  | 1.2219610  | 2.7592393 |
| C | 4.2973215  | 2.0746346  | 3.8984604 |
| C | 3.1693589  | 1.3990316  | 1.7451319 |

|   |            |            |            |    |            |            |            |
|---|------------|------------|------------|----|------------|------------|------------|
| C | 3.0297228  | 0.3913819  | 0.7803195  | C  | 3.5417803  | -5.4498741 | -3.9502123 |
| O | 0.3856384  | 1.0888784  | 1.6029275  | H  | 3.2218669  | -6.2678358 | -4.6288257 |
| O | 2.0439396  | 0.5035039  | -0.2007077 | H  | 2.3008386  | -5.0269625 | -0.3946484 |
| P | 0.4747302  | 0.2566253  | 0.1854922  | C  | 3.2805455  | 0.3816324  | -3.2398462 |
| O | -0.3116885 | 0.9383365  | -0.9452754 | H  | 6.0657457  | 0.4272491  | -3.2243750 |
| O | 0.1308577  | -1.1866180 | 0.5442172  | H  | 6.3291741  | -0.9670472 | -2.1225357 |
| C | 3.6097416  | 6.6563881  | 1.8749173  | C  | 3.6729407  | -1.5995423 | -1.6838463 |
| C | 4.5505671  | 5.6018141  | 1.7402564  | C  | 1.5464658  | -3.8877214 | 2.0850143  |
| H | 1.5117777  | 7.1801464  | 1.9766999  | C  | 3.0765145  | -3.0889284 | 0.1908180  |
| H | 3.9568569  | 7.6992303  | 1.9316250  | H  | 5.0456161  | -4.1036579 | 1.8445960  |
| H | 4.8675246  | 3.4762227  | 1.5688840  | H  | 3.8680130  | -5.4177339 | 1.5620351  |
| H | 5.6249059  | 5.8322085  | 1.6767182  | C  | 4.2377114  | -0.2946319 | -2.2427483 |
| C | 5.2965388  | 1.8818001  | 4.8422771  | C  | 3.5616559  | -1.8375589 | -0.2854115 |
| C | 6.2339657  | 0.8254320  | 4.6969342  | C  | 2.9549948  | -3.4204507 | 1.6797430  |
| H | 3.5729312  | 2.8895757  | 4.0328701  | H  | 2.2865190  | 0.5555714  | -2.7836569 |
| H | 5.3569133  | 2.5506469  | 5.7143711  | H  | 0.7984525  | -3.1039180 | 1.8616802  |
| H | 7.0278100  | 0.6875462  | 5.4466902  | H  | 3.1369573  | -0.2331509 | -4.1526589 |
| H | 6.8285992  | -0.8881268 | 3.5149073  | H  | 0.3521476  | -4.0946767 | -3.4107061 |
| C | -1.9435842 | 3.4167869  | -0.1181987 | H  | 1.2337364  | -4.8078199 | 1.5511262  |
| C | -1.4712150 | 3.0741731  | 1.1779929  | H  | 3.9811151  | -4.6469355 | -4.5788626 |
| C | -3.1765663 | 2.8594026  | -0.5684459 | H  | 4.3775529  | 0.4064019  | -1.3946598 |
| C | -2.2512075 | 2.2268462  | 2.0185691  | H  | 3.1569914  | -2.4932191 | 2.2521926  |
| C | -3.4672430 | 1.7138980  | 1.5435246  | H  | 3.3830084  | -2.4277460 | -3.6589495 |
| C | -3.9715975 | 2.0266855  | 0.2659875  | Zn | -2.1705013 | 0.9078581  | -1.5370114 |
| H | -3.5841844 | 3.2038882  | -1.5313276 | Br | -2.7673341 | 0.9753847  | -3.7933197 |
| C | -1.8393102 | 1.9271836  | 3.4560204  | C  | -3.7390652 | -3.5991293 | -5.1599473 |
| H | -4.0601226 | 1.0557095  | 2.1944398  | C  | -3.7962385 | -1.4999388 | -1.4403503 |
| C | -1.8842168 | 0.4286021  | 3.7958262  | C  | -2.5292404 | -3.3014021 | -4.5103502 |
| H | -2.9173022 | 0.0267694  | 3.7619141  | C  | -4.9766175 | -2.5376004 | -3.3628201 |
| H | -1.4913329 | 0.2592435  | 4.8188899  | C  | -3.7632635 | -2.2579755 | -2.6829575 |
| H | -1.2601420 | -0.1531254 | 3.0902611  | C  | -4.9647173 | -3.2086191 | -4.5875016 |
| C | -2.7147107 | 2.7519395  | 4.4215284  | C  | -2.5359191 | -2.6342187 | -3.2820802 |
| H | -0.7944821 | 2.2736739  | 3.5880576  | O  | -2.7212853 | -1.0250631 | -0.8734722 |
| H | -3.7815372 | 2.4559842  | 4.3439082  | H  | -3.7287224 | -4.1232164 | -6.1279936 |
| H | -2.6468168 | 3.8372918  | 4.2045403  | H  | -5.9315050 | -2.1914793 | -2.9373377 |
| H | -2.3938893 | 2.5894763  | 5.4709228  | H  | -1.5697821 | -3.5866177 | -4.9662084 |
| C | -5.3768496 | 1.5604243  | -0.1109060 | H  | -5.9101394 | -3.4155776 | -5.1111253 |
| C | -6.4092114 | 2.1322052  | 0.8834188  | H  | -1.5925051 | -3.3803276 | -2.7831510 |
| H | -7.4250700 | 1.7736246  | 0.6213570  | Br | -1.0599627 | -4.4242749 | -0.8276498 |
| H | -6.4151870 | 3.2416162  | 0.8515100  | Zn | -1.4516930 | -2.3330725 | 0.2301034  |
| H | -6.2018376 | 1.8104700  | 1.9218926  | H  | -6.4912783 | -2.5931797 | -0.9574841 |
| C | -5.7887473 | 1.8582857  | -1.5557722 | H  | -2.3846783 | -3.7860325 | 1.8549543  |
| H | -5.3953066 | 0.4581226  | 0.0337141  | C  | -4.6422974 | -3.2538752 | 0.0653143  |
| H | -6.7820792 | 1.4132317  | -1.7645401 | C  | -6.1038985 | -2.9210866 | 0.0298746  |
| H | -5.0720967 | 1.4536898  | -2.2989957 | H  | -4.1901513 | -4.0832156 | -0.4972911 |
| H | -5.8772473 | 2.9502357  | -1.7356313 | C  | -4.0911957 | -2.6594446 | 1.1984443  |
| C | -1.2140107 | 4.4106954  | -1.0191505 | C  | -2.8054211 | -2.7657412 | 1.7963262  |
| C | -0.9909523 | 3.9233341  | -2.4573398 | C  | -5.1202064 | -1.6851082 | 1.6994088  |
| H | -0.4247165 | 4.6872946  | -3.0278072 | O  | -6.2719533 | -1.8435884 | 0.9668406  |
| H | -1.9365512 | 3.7378769  | -3.0051422 | O  | -5.0387304 | -0.8728813 | 2.5993548  |
| H | -0.4006367 | 2.9860969  | -2.4753889 | H  | -6.7368376 | -3.7776290 | 0.3592882  |
| C | -1.9562424 | 5.7625497  | -0.9942627 | H  | -2.6555708 | -2.1479196 | 2.6964947  |
| H | -0.2108317 | 4.5760406  | -0.5817006 | H  | -4.7573850 | -1.0059507 | -1.1881032 |
| H | -1.3959258 | 6.5236027  | -1.5749771 |    |            |            |            |
| H | -2.0848190 | 6.1428892  | 0.0395932  |    |            |            |            |
| H | -2.9673860 | 5.6732070  | -1.4438844 |    |            |            |            |
| H | 1.9543851  | -5.7694047 | -2.5240512 |    |            |            |            |
| H | 5.5740377  | -1.2224831 | -3.7246535 |    |            |            |            |
| H | 3.9794871  | -4.6550727 | 3.1808643  |    |            |            |            |
| C | 2.3544631  | -4.9234833 | -3.1244260 |    |            |            |            |
| H | 3.6864094  | 1.3619493  | -3.5648469 |    |            |            |            |
| H | 0.8634775  | -5.2333416 | -4.7038102 |    |            |            |            |
| H | 1.5121924  | -4.1001066 | 3.1737209  |    |            |            |            |
| C | 2.7919407  | -3.8516117 | -2.1346178 |    |            |            |            |
| C | 5.6293474  | -0.5266510 | -2.8614569 |    |            |            |            |
| C | 1.2115921  | -4.4251099 | -4.0270261 |    |            |            |            |
| H | 1.5362642  | -3.5734485 | -4.6613391 |    |            |            |            |
| C | 3.2918435  | -2.6141301 | -2.5767575 |    |            |            |            |
| C | 4.0220309  | -4.4536311 | 2.0901725  |    |            |            |            |
| H | 4.3474045  | -5.8397634 | -3.2957413 |    |            |            |            |
| C | 2.7029750  | -4.0658234 | -0.7510777 |    |            |            |            |

### 7.2.3.4 to 15q-ma

### TS3-8-q; COSMO

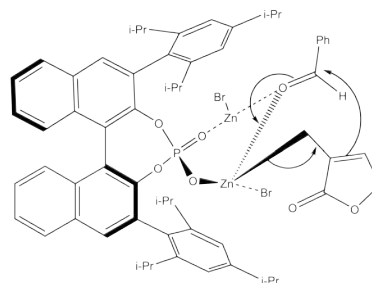

Energy(Hartree)= -11970.02006088

|   |            |            |            |    |            |            |            |
|---|------------|------------|------------|----|------------|------------|------------|
| C | 0.9778381  | 2.4667528  | 1.9616360  | H  | -1.4702337 | 6.5288332  | 0.5149017  |
| C | 2.3717723  | 2.4721526  | 1.8728386  | H  | -2.7484089 | 6.1619166  | -0.6796821 |
| C | 3.0285735  | 3.7566450  | 1.8102164  | H  | 0.5002867  | -4.8668025 | -3.4077607 |
| C | 4.4280065  | 3.9031003  | 1.5713129  | H  | 5.0586947  | -1.0581745 | -3.9665782 |
| C | 2.2311692  | 4.9538963  | 1.9563533  | H  | 2.7052577  | -4.7419350 | 2.7491283  |
| C | 2.8775807  | 6.2265335  | 1.9319533  | C  | 1.3647220  | -4.3070369 | -3.8292623 |
| C | 0.8115817  | 4.8587170  | 2.0594295  | H  | 3.6499711  | 1.7251531  | -3.2176536 |
| H | 0.2218508  | 5.7857101  | 2.1277108  | H  | 0.3182251  | -4.1549279 | -5.7445194 |
| C | 0.1559463  | 3.6345411  | 2.0105778  | H  | 0.1175758  | -4.0938114 | 2.3372442  |
| C | 3.4178880  | -0.9883431 | 0.5516463  | C  | 1.9080409  | -3.4392161 | -2.7007661 |
| C | 4.5360895  | -1.2574005 | 1.3303276  | C  | 5.2593346  | -0.5634769 | -2.9931564 |
| H | 5.1293833  | -2.1626499 | 1.1309735  | C  | 0.8534393  | -3.4963205 | -5.0299001 |
| C | 4.9318544  | -0.3967570 | 2.3963438  | H  | 1.6870937  | -3.0237632 | -5.5900574 |
| C | 6.0318919  | -0.7326564 | 3.2417670  | C  | 2.6510353  | -2.2741279 | -2.9465257 |
| C | 4.1987809  | 0.8229046  | 2.6460375  | C  | 2.9454420  | -4.4395226 | 1.7086614  |
| C | 4.5671475  | 1.6138258  | 3.7758370  | H  | 2.7434889  | -5.9725790 | -3.4106829 |
| C | 3.1055408  | 1.1754628  | 1.7718888  | C  | 1.6942764  | -3.8095966 | -1.3607791 |
| C | 2.7249437  | 0.2353950  | 0.8063863  | C  | 2.4142791  | -5.3479290 | -4.2655787 |
| O | 0.3221848  | 1.2399217  | 2.0263140  | H  | 2.0069546  | -6.0208130 | -5.0489927 |
| O | 1.6291240  | 0.5022724  | -0.0151388 | H  | 1.1033912  | -4.7184194 | -1.1622155 |
| P | 0.1426528  | 0.3760412  | 0.6557986  | C  | 3.0930052  | 0.7790787  | -3.0552492 |
| O | -0.8570131 | 0.9723951  | -0.3242317 | H  | 5.8453988  | 0.3558583  | -3.2001134 |
| O | -0.1392581 | -1.0539404 | 1.1803083  | H  | 5.8929434  | -1.2477399 | -2.3925024 |
| C | 4.2464711  | 6.3304232  | 1.7346112  | C  | 3.1685300  | -1.4828252 | -1.9046388 |
| C | 5.0222414  | 5.1575554  | 1.5358784  | C  | 0.4849323  | -4.1344373 | 1.2930987  |
| H | 2.2602854  | 7.1302376  | 2.0558780  | C  | 2.1820267  | -3.0504542 | -0.2807987 |
| H | 4.7294653  | 7.3191579  | 1.7124661  | H  | 3.9460085  | -3.9669786 | 1.7164681  |
| H | 5.0398189  | 3.0059437  | 1.4049409  | H  | 3.0112560  | -5.3583664 | 1.0892526  |
| H | 6.1030801  | 5.2422335  | 1.3455580  | C  | 3.9508443  | -0.2195892 | -2.2578414 |
| C | 5.6304046  | 1.2482038  | 4.5902665  | C  | 2.9367645  | -1.8754478 | -0.5585143 |
| C | 6.3808617  | 0.0739047  | 4.3148730  | C  | 1.8719940  | -3.4843187 | 1.1517740  |
| C | 3.9890409  | 2.5199450  | 4.0045810  | H  | 2.1503063  | 1.0121607  | -2.5235795 |
| H | 5.8898524  | 1.8716871  | 5.4594555  | H  | -0.2532619 | -3.6249040 | 0.6316261  |
| H | 7.2273119  | -0.2013521 | 4.9622798  | H  | 2.8159730  | 0.3775882  | -4.0519024 |
| H | 6.5909305  | -1.6582129 | 3.0324057  | H  | 0.1695251  | -2.6805369 | -4.7179466 |
| C | -1.9756057 | 3.8236911  | 0.6710367  | H  | 0.4708624  | -5.1955918 | 0.9696702  |
| C | -1.3264479 | 3.4607499  | 1.8880970  | H  | 3.3133415  | -4.8457429 | -4.6805353 |
| C | -3.3332333 | 3.4913234  | 0.5092872  | H  | 4.2385298  | 0.2768151  | -1.3085768 |
| C | -2.0587852 | 2.7959501  | 2.9105109  | H  | 1.8682225  | -2.5667497 | 1.7742611  |
| C | -3.4138508 | 2.4893844  | 2.6939142  | H  | 2.8217390  | -1.9520536 | -3.9847145 |
| C | -4.0696062 | 2.0099892  | 1.4934908  | Zn | -1.8888181 | 0.3258043  | -1.9137889 |
| H | -3.8376668 | 3.7544255  | -0.4349486 | Br | -0.7658420 | 0.3126453  | -3.9603406 |
| C | -1.4268264 | 2.4297830  | 4.2521196  | C  | -2.4759161 | -6.8897386 | -2.5041573 |
| H | -3.9698847 | 1.9704542  | 3.4891418  | C  | -2.0284579 | -2.6447716 | -2.3073726 |
| C | -1.6298538 | 0.9491451  | 4.6191791  | C  | -2.4121143 | -6.2719420 | -1.2393829 |
| H | -2.6988948 | 0.7104134  | 4.7978134  | C  | -2.3018517 | -4.7190725 | -3.5779950 |
| H | -1.0787138 | 0.7014626  | 5.5497455  | C  | -2.2232711 | -4.0874519 | -2.3090225 |
| H | -1.2609487 | 0.2838922  | 3.8140057  | C  | -2.4234425 | -6.1106809 | -3.6724211 |
| C | -1.9458994 | 3.3628225  | 5.3631962  | C  | -2.2866112 | -4.8842953 | -1.1393398 |
| H | -0.3342266 | 2.6032295  | 4.1713950  | O  | -1.6547208 | -1.9222854 | -1.3190126 |
| H | -3.0415253 | 3.2482973  | 5.5020546  | H  | -2.5692956 | -7.9839961 | -2.5759112 |
| H | -1.7485159 | 4.4265186  | 5.1193830  | H  | -2.2317103 | -4.1056433 | -4.4895868 |
| H | -1.4560486 | 3.1343655  | 6.3326285  | H  | -2.4658697 | -6.8803559 | -0.3242213 |
| C | -5.5389598 | 2.4785473  | 1.2597241  | H  | -2.4701966 | -6.5905430 | -4.6612394 |
| C | -5.9728440 | 1.1392440  | 1.8746127  | H  | -2.2737500 | -4.4174887 | -0.1441227 |
| H | -7.0056449 | 0.8854714  | 1.5603397  | Br | -3.5919676 | -2.6809514 | 1.8114411  |
| H | -5.9713175 | 1.1763006  | 2.9840242  | Zn | -1.7119856 | -2.0168993 | 0.6881911  |
| H | -5.3069780 | 0.3068321  | 1.5685101  | H  | -4.6149858 | -3.5620223 | -3.8740055 |
| C | -6.4349062 | 3.6313862  | 1.7544385  | C  | -4.5667166 | -2.1727091 | -2.1657302 |
| H | -5.6736664 | 2.4005983  | 0.1577735  | C  | -5.1769188 | -2.7127897 | -3.4223610 |
| H | -7.5041315 | 3.4276545  | 1.5371204  | C  | -4.3958870 | -0.8078867 | -2.3037935 |
| H | -6.1610240 | 4.5911002  | 1.2716546  | C  | -3.8834669 | 0.2011973  | -1.4199012 |
| H | -6.3279987 | 3.7651591  | 2.8516327  | C  | -4.7687923 | -0.4692770 | -3.7238815 |
| C | -1.2579136 | 4.5613786  | -0.4604800 | O  | -5.1865289 | -1.6187131 | -4.3501098 |
| C | -1.4718465 | 3.9294145  | -1.8459702 | O  | -4.7462307 | 0.6085530  | -4.2768980 |
| H | -0.9130623 | 4.4954736  | -2.6189362 | H  | -6.2228217 | -3.0631916 | -3.2664746 |
| H | -2.5377939 | 3.9257028  | -2.1544629 | H  | -4.5250123 | -2.7331940 | -1.2213320 |
| H | -1.0982201 | 2.8880074  | -1.8706998 | H  | -1.9779364 | -2.1512675 | -3.3030975 |
| C | -1.6647912 | 6.0484362  | -0.4656222 | H  | -3.9475859 | -0.0150982 | -0.3386981 |
| H | -0.1692041 | 4.5159517  | -0.2567934 | H  | -4.2200786 | 1.2242081  | -1.6788901 |
| H | -1.1045981 | 6.6095657  | -1.2420611 |    |            |            |            |

TS3-8-q



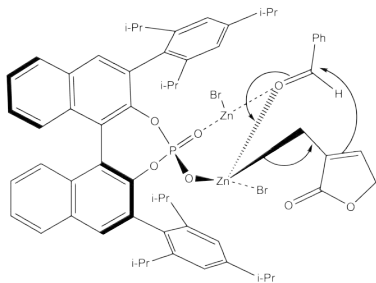

Energy(Hartree)= -11970.00679487  
 number of imaginary frequencies: 1

|   |            |            |            |
|---|------------|------------|------------|
| C | 0.9772908  | 2.4655472  | 1.9631214  |
| C | 2.3713784  | 2.4707804  | 1.8749104  |
| C | 3.0284713  | 3.7551299  | 1.8119005  |
| C | 4.4278962  | 3.9011866  | 1.5740988  |
| C | 2.2315535  | 4.9525945  | 1.9566487  |
| C | 2.8787654  | 6.2242670  | 1.9318228  |
| C | 0.8121691  | 4.8574809  | 2.0587713  |
| H | 0.2220532  | 5.7843275  | 2.1255990  |
| C | 0.1558869  | 3.6339508  | 2.0105688  |
| C | 3.4180148  | -0.9892789 | 0.5539705  |
| C | 4.5374257  | -1.2567679 | 1.3310596  |
| H | 5.1311967  | -2.1613409 | 1.1298142  |
| C | 4.9342042  | -0.3961465 | 2.3964628  |
| C | 6.0355946  | -0.7298272 | 3.2402415  |
| C | 4.2003690  | 0.8226925  | 2.6469384  |
| C | 4.5700831  | 1.6142609  | 3.7754914  |
| C | 3.1055274  | 1.1743176  | 1.7745878  |
| C | 2.7242246  | 0.2337765  | 0.8098458  |
| O | 0.3206943  | 1.2401605  | 2.0284880  |
| O | 1.6284233  | 0.4991364  | -0.0102937 |
| P | 0.1409547  | 0.3739372  | 0.6596490  |
| O | -0.8541693 | 0.9714750  | -0.3239716 |
| O | -0.1432695 | -1.0546917 | 1.1857212  |
| C | 4.2473258  | 6.3278659  | 1.7356881  |
| C | 5.0224121  | 5.1550361  | 1.5384519  |
| H | 2.2615740  | 7.1282125  | 2.0543667  |
| H | 4.7304731  | 7.3164552  | 1.7132431  |
| H | 5.0390044  | 3.0034578  | 1.4088485  |
| H | 6.1034093  | 5.2390761  | 1.3489659  |
| C | 5.6348827  | 1.2502898  | 4.5879494  |
| C | 6.3857857  | 0.0771132  | 4.3120024  |
| H | 3.9911995  | 2.5198396  | 4.0039260  |
| H | 5.8952229  | 1.8745926  | 5.4562241  |
| H | 7.2336762  | -0.1971121 | 4.9578948  |
| H | 6.5951741  | -1.6549771 | 3.0304640  |
| C | -1.9741151 | 3.8207404  | 0.6686988  |
| C | -1.3263026 | 3.4601913  | 1.8869323  |
| C | -3.3308322 | 3.4861848  | 0.5061617  |
| C | -2.0588536 | 2.7960795  | 2.9093167  |
| C | -3.4128446 | 2.4872951  | 2.6913455  |
| C | -4.0675655 | 2.8053636  | 1.4900366  |
| H | -3.8343477 | 3.7475846  | -0.4390520 |
| C | -1.4282209 | 2.4337767  | 4.2524955  |
| H | -3.9688538 | 1.9679996  | 3.4862659  |
| C | -1.6279232 | 0.9535375  | 4.6224720  |
| H | -2.6963502 | 0.7119503  | 4.8004956  |
| H | -1.0775163 | 0.7091445  | 5.5541933  |
| H | -1.2559743 | 0.2873369  | 3.8198030  |
| C | -1.9508610 | 3.3685746  | 5.3602456  |
| H | -0.3358914 | 2.6095455  | 4.1727201  |
| H | -3.0463621 | 3.2526132  | 5.4977614  |
| H | -1.7558144 | 4.4318669  | 5.1139140  |
| H | -1.4624293 | 3.1439358  | 6.3311938  |
| C | -5.5364140 | 2.4722432  | 1.2552181  |
| C | -5.9703771 | 1.1336658  | 1.8715074  |

|    |            |            |            |
|----|------------|------------|------------|
| H  | -7.0026375 | 0.8786468  | 1.5565801  |
| H  | -5.9709866 | 1.1725575  | 2.9807604  |
| H  | -5.3041233 | 0.3005807  | 1.5685893  |
| C  | -6.4336020 | 3.6256405  | 1.7462625  |
| H  | -5.6696302 | 2.3916526  | 0.1531602  |
| H  | -7.5026206 | 3.4214843  | 1.5282791  |
| H  | -6.1592638 | 4.5845506  | 1.2626098  |
| H  | -6.3279173 | 3.7619908  | 2.8430668  |
| C  | -1.2563509 | 4.5585594  | -0.4626882 |
| C  | -1.4665550 | 3.9259356  | -1.8485187 |
| H  | -0.9073584 | 4.4920865  | -2.6207934 |
| H  | -2.5314791 | 3.9205891  | -2.1601880 |
| H  | -1.0911383 | 2.8853692  | -1.8734375 |
| C  | -1.6662081 | 6.0447506  | -0.4686059 |
| H  | -0.1678479 | 4.5154139  | -0.2573119 |
| H  | -1.1066076 | 6.6071836  | -1.2444212 |
| H  | -1.4746023 | 6.5258699  | 0.5120591  |
| H  | -2.7496531 | 6.1563438  | -0.6836660 |
| H  | 0.5011797  | -4.8655596 | -3.4075175 |
| H  | 5.0523423  | -1.0510663 | -3.9663465 |
| H  | 2.7127436  | -4.7461957 | -2.7476933 |
| C  | 1.3632813  | -4.3024026 | -3.8296594 |
| H  | 3.6430902  | 1.7310699  | -3.2107264 |
| H  | 0.3136038  | -4.1480582 | -5.7435336 |
| H  | 0.1219262  | -4.0998917 | -2.3375729 |
| C  | 1.9070811  | -3.4360797 | -2.7002361 |
| C  | 5.2539598  | -0.5577553 | -2.9925662 |
| C  | 0.8471402  | -3.4898007 | -5.0271441 |
| H  | 1.6782069  | -3.0134752 | -5.5879667 |
| C  | 2.6478793  | -2.2697498 | -2.9445443 |
| C  | 2.9507071  | -4.4421290 | 1.7071378  |
| H  | 2.7482315  | -5.9644714 | -3.4187624 |
| C  | 1.6959379  | -3.8093001 | -1.3609382 |
| C  | 2.4146503  | -5.3390896 | -4.2710158 |
| H  | 2.0082945  | -6.0113206 | -5.0555082 |
| H  | 1.1063316  | -4.7193010 | -1.1636342 |
| C  | 3.0869435  | 0.7845696  | -3.0490859 |
| H  | 5.8392941  | 0.3619236  | -3.1995773 |
| H  | 5.8888583  | -1.2428302 | -2.3944590 |
| C  | 3.1660210  | -1.4797736 | -1.9024146 |
| C  | 0.4895521  | -4.1398105 | 1.2934492  |
| C  | 2.1840253  | -3.0516136 | -0.2804066 |
| H  | 3.9503576  | -3.9680827 | 1.7146058  |
| H  | 3.0180559  | -5.3600074 | 1.0865645  |
| C  | 3.9464888  | -0.2152639 | -2.2548531 |
| C  | 2.9365697  | -1.8752607 | -0.5568485 |
| C  | 1.8757936  | -3.4877525 | 1.1519513  |
| H  | 2.1449915  | 1.0172210  | -2.5163871 |
| H  | -0.2494990 | -3.6318459 | 0.6325912  |
| H  | 2.8079040  | 0.3858609  | -4.0461110 |
| H  | 0.1620164  | -2.6756771 | -4.7130258 |
| H  | 0.4775450  | -5.2012317 | 0.9701723  |
| H  | 3.3112014  | -4.8333328 | -4.6860964 |
| H  | 4.2357733  | 0.2793126  | -1.3050665 |
| H  | 1.8703597  | -2.5708055 | 1.7754595  |
| H  | 2.8156377  | -1.9446208 | -3.9821553 |
| Zn | -1.8822465 | 0.3231005  | -1.9146045 |
| Br | -0.7610508 | 0.2906924  | -3.9585894 |
| C  | -2.5031554 | -6.8856123 | -2.5052415 |
| C  | -2.0325941 | -2.6392663 | -2.3045194 |
| C  | -2.4427006 | -6.2674212 | -1.2411764 |
| C  | -2.3086433 | -4.7150482 | -3.5763837 |
| C  | -2.2337053 | -4.0831297 | -2.3076827 |
| C  | -2.4387880 | -6.1060245 | -3.6719743 |
| C  | -2.3088886 | -4.8803652 | -1.1394373 |
| O  | -1.6561901 | -1.9202342 | -1.3140615 |
| H  | -2.6032803 | -7.9792952 | -2.5778746 |
| H  | -2.2265365 | -4.1018011 | -4.4872627 |
| H  | -2.5062263 | -6.8748852 | -0.3259052 |
| H  | -2.4826518 | -6.5850088 | -4.6614260 |
| H  | -2.2997729 | -4.4139920 | -0.1438488 |

|    |            |            |            |
|----|------------|------------|------------|
| Br | -3.5936443 | -2.6900287 | 1.8106237  |
| Zn | -1.7151310 | -2.0182281 | 0.6924931  |
| H  | -4.5929894 | -3.5686796 | -3.8674458 |
| C  | -4.5453921 | -2.1776352 | -2.1603860 |
| C  | -5.1560109 | -2.7183419 | -3.4180412 |
| C  | -4.3819270 | -0.8107563 | -2.3007409 |
| C  | -3.8778771 | 0.2000551  | -1.4190051 |
| C  | -4.7574296 | -0.4723760 | -3.7232842 |
| O  | -5.1711363 | -1.6289752 | -4.3467140 |
| O  | -4.7404851 | 0.6042459  | -4.2715872 |
| H  | -6.2009777 | -3.0729697 | -3.2593128 |
| H  | -4.5029697 | -2.7353421 | -1.2142139 |
| H  | -1.9721756 | -2.1448927 | -3.2993595 |
| H  | -3.9403804 | -0.0122598 | -0.3369248 |
| H  | -4.2110832 | 1.2221472  | -1.6857153 |

### 7.2.3.5 to 15j-ma

#### TS1-8-j; COSMO

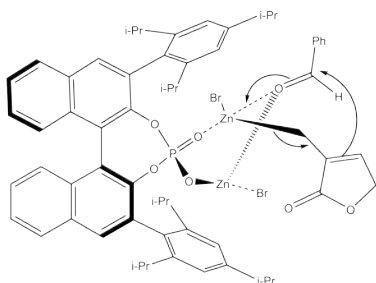

Energy(Hartree) = -11970.00936755

|    |            |            |            |
|----|------------|------------|------------|
| Zn | 2.2769819  | 0.8807143  | -0.4476158 |
| Br | 4.5652901  | 0.8170876  | -0.3283583 |
| H  | 3.7383043  | 3.6875355  | 0.5158586  |
| Br | -2.3877684 | 2.8011915  | -3.5691163 |
| H  | -1.4425717 | 4.3015233  | -0.2867467 |
| Zn | -0.7850400 | 2.5193828  | -1.8393188 |
| C  | 1.9798376  | 4.7339096  | -0.3457694 |
| C  | 2.8273445  | 4.2577946  | 0.8044175  |
| C  | 0.6801043  | 4.3064198  | -0.1413141 |
| C  | -0.5246095 | 4.3694357  | -0.9040992 |
| C  | 0.6848447  | 3.4526639  | 1.0918639  |
| O  | 1.9793185  | 3.3749448  | 1.5655919  |
| O  | -0.2489508 | 2.8924682  | 1.6184479  |
| H  | 3.1537886  | 5.0917359  | 1.4665431  |
| H  | -0.5848325 | 5.1199683  | -1.7102116 |
| H  | 2.3053925  | 5.5166661  | -1.0417333 |
| C  | 0.9891655  | 4.6801470  | -5.3360585 |
| C  | 1.0990714  | 3.8153425  | -4.2418480 |
| C  | 2.2071279  | 3.9139630  | -3.3667772 |
| C  | 3.2223159  | 4.8699715  | -3.6334421 |
| C  | 3.1141046  | 5.7214995  | -4.7348004 |
| C  | 1.9916565  | 5.6339889  | -5.5832335 |
| H  | 0.1148261  | 4.6016517  | -5.9992727 |
| H  | 0.3211163  | 3.0541947  | -4.0836628 |
| C  | 2.3561612  | 3.0437191  | -2.2148347 |
| H  | 4.0947416  | 4.9361664  | -2.9638018 |
| H  | 3.9035985  | 6.4600537  | -4.9391453 |
| H  | 1.9048718  | 6.3106204  | -6.4472058 |
| O  | 1.5260241  | 2.0961634  | -1.9350196 |
| C  | -1.7692712 | -1.3244969 | 1.9854223  |
| C  | -2.0094562 | -2.6271274 | 1.5269969  |
| C  | -2.0637460 | -3.6836069 | 2.5170845  |
| C  | -2.1060323 | -5.0712793 | 2.1791893  |
| C  | -2.0291262 | -3.3343476 | 3.9172673  |

|   |            |            |            |
|---|------------|------------|------------|
| C | -2.1311342 | -4.3624732 | 4.9026561  |
| C | -1.8298263 | -1.9782771 | 4.2983557  |
| H | -1.7864127 | -1.7263814 | 5.3688722  |
| C | -1.6348296 | -0.9708306 | 3.3614329  |
| C | -0.8162152 | -3.0663513 | -2.0920965 |
| C | -1.7568735 | -3.9694122 | -2.5767773 |
| H | -1.6139010 | -4.4265213 | -3.5667826 |
| C | -2.9314793 | -4.3007934 | -1.8376953 |
| C | -3.9409514 | -5.1396797 | -2.3992331 |
| C | -3.1178173 | -3.7783695 | -0.5039195 |
| C | -4.3301810 | -4.0809993 | 0.1834413  |
| C | -2.0799610 | -2.9588001 | 0.0725103  |
| C | -1.0436531 | -2.5587551 | -0.7743128 |
| O | -1.7067078 | -0.2645591 | 1.0732493  |
| O | -0.0900693 | -1.6791296 | -0.2885463 |
| P | -0.4646382 | -0.1244545 | 0.0391756  |
| O | 0.8512564  | 0.3648706  | 0.6982245  |
| O | -0.9677608 | 0.6587094  | -1.1718015 |
| C | -2.2149696 | -5.6967062 | 4.5360327  |
| C | -2.1797055 | -6.0501230 | 3.1610855  |
| H | -2.1194065 | -4.0719127 | 5.9648996  |
| H | -2.2854287 | -6.4811133 | 5.3049182  |
| H | -2.0658301 | -5.3718008 | 1.1242427  |
| H | -2.2040969 | -7.1108513 | 2.8680120  |
| C | -5.3014049 | -4.8829294 | -0.4008677 |
| C | -5.1019146 | -5.4290188 | -1.6971011 |
| H | -4.4935529 | -3.6596092 | 1.1857747  |
| H | -6.2348920 | -5.0930220 | 0.1431625  |
| H | -5.8752001 | -6.0699432 | -2.1472700 |
| H | -3.7859050 | -5.5415913 | -3.4129036 |
| C | 0.0768511  | 0.6678840  | 4.2147788  |
| C | -1.2612754 | 0.4129404  | 3.8012268  |
| C | 0.3816870  | 1.9283619  | 4.7549190  |
| C | -2.2340048 | 1.4419097  | 3.8595726  |
| C | -1.8735052 | 2.6891880  | 4.4019202  |
| C | -0.5765000 | 2.9503214  | 4.8705320  |
| H | 1.4137985  | 2.1370010  | 5.0796563  |
| C | -3.6441713 | 1.2463332  | 3.3102303  |
| H | -2.6332639 | 3.4846937  | 4.4420404  |
| C | -3.8792928 | 2.1512437  | 2.0849351  |
| H | -3.8515520 | 3.2241574  | 2.3685329  |
| H | -4.8701663 | 1.9472705  | 1.6284019  |
| H | -3.0972496 | 1.9870855  | 1.3183944  |
| C | -4.7240124 | 1.4515451  | 4.3866009  |
| H | -3.7280724 | 0.1950327  | 2.9645410  |
| H | -4.7193592 | 2.4912463  | 4.7757960  |
| H | -4.5679923 | 0.7701381  | 5.2477882  |
| H | -5.7349126 | 1.2563798  | 3.9721344  |
| C | -0.1607961 | 4.3203791  | 5.3956841  |
| C | 0.3733165  | 5.1912785  | 4.2400024  |
| H | 0.7230987  | 6.1774476  | 4.6114449  |
| H | -0.4232572 | 5.3667468  | 3.4868299  |
| H | 1.2150322  | 4.6911381  | 3.7213460  |
| C | -1.2661153 | 5.0502769  | 6.1718638  |
| H | 0.6858085  | 4.1484981  | 6.0979358  |
| H | -0.8720157 | 5.9815046  | 6.6278615  |
| H | -1.6818141 | 4.4182603  | 6.9827197  |
| H | -2.1063247 | 5.3448785  | 5.5088907  |
| C | 1.1827373  | -0.3773144 | 4.0569393  |
| C | 2.4957519  | 0.2279094  | 3.5260498  |
| H | 3.1847598  | -0.5761790 | 3.1948449  |
| H | 3.0260688  | 0.8110056  | 4.3079523  |
| H | 2.3110332  | 0.9026437  | 2.6698603  |
| C | 1.4377118  | -1.1480257 | 5.3660566  |
| H | 0.8325465  | -1.1084128 | 3.2978913  |
| H | 2.2419289  | -1.9012174 | 5.2303697  |
| H | 0.5313918  | -1.6791509 | 5.7173055  |
| H | 1.7545218  | -0.4534574 | 6.1724597  |
| H | 3.6674666  | -0.7688943 | -5.8619286 |
| H | 3.6295819  | -4.7092904 | -1.9602811 |
| H | -2.1977463 | -2.7361913 | -6.4261067 |

|   |            |            |            |
|---|------------|------------|------------|
| C | 3.8236008  | -0.6614549 | -4.7648538 |
| H | 2.8841374  | -3.5429037 | 0.9344089  |
| H | 4.5690638  | 1.3959671  | -5.0047415 |
| H | -2.4010752 | -0.2591159 | -5.7319799 |
| C | 2.6529457  | -1.3731417 | -4.0942460 |
| C | 2.6387975  | -4.9074073 | -1.5004998 |
| C | 3.7865235  | 0.8454995  | -4.4424331 |
| H | 3.9702413  | 1.0064326  | -3.3596766 |
| C | 2.7836912  | -2.0939830 | -2.8947342 |
| C | -1.2018517 | -2.7809442 | -5.9385542 |
| H | 5.2335280  | -2.3460525 | -4.6154631 |
| C | 1.3736039  | -1.3011315 | -4.6701897 |
| C | 5.1968637  | -1.2545254 | -4.4240454 |
| H | 5.9877787  | -0.7723875 | -5.0335186 |
| H | 1.2579543  | -0.7611860 | -5.6235708 |
| C | 2.7875880  | -2.8922181 | 0.0413514  |
| H | 2.7946404  | -5.5860013 | -0.6362419 |
| H | 2.0200963  | -5.4405282 | -2.2505797 |
| C | 1.6852296  | -2.7131969 | -2.2677539 |
| C | -1.3720151 | -0.3304464 | -5.3245853 |
| C | 0.2350649  | -1.8760974 | -4.0756618 |
| H | -1.0395311 | -3.8177834 | -5.5800655 |
| H | -0.4339567 | -2.5800826 | -6.7151419 |
| C | 1.9626902  | -3.5966982 | -1.0494583 |
| C | 0.3845510  | -2.5765099 | -2.8411161 |
| C | -1.1046187 | -1.7474222 | -4.7981317 |
| H | 2.3034680  | -1.9504291 | 0.3668752  |
| H | -1.2850187 | 0.4263204  | -4.5219001 |
| H | 3.8143441  | -2.6485997 | -0.3009333 |
| H | 2.8041693  | 1.2923120  | -4.6936095 |
| H | -0.6784734 | -0.0482340 | -6.1441676 |
| H | 5.4585305  | -1.0845189 | -3.3586636 |
| H | 0.9925911  | -3.8827831 | -0.5972125 |
| H | -1.9057983 | -1.9729938 | -4.0654806 |
| H | 3.7779499  | -2.2047804 | -2.4383496 |
| H | 3.3463605  | 3.0416995  | -1.7138002 |

### TS1-8-j

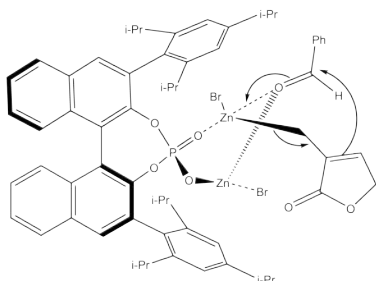

Energy(Hartree)= -11969.99809173  
number of imaginary frequencies: 1

|    |            |           |            |
|----|------------|-----------|------------|
| Zn | 2.2731357  | 0.8841971 | -0.4411595 |
| Br | 4.5620029  | 0.8349559 | -0.3478512 |
| H  | 3.7279527  | 3.6677528 | 0.5227334  |
| Br | -2.3397566 | 2.8301614 | -3.6137280 |
| H  | -1.4485884 | 4.2861754 | -0.2946478 |
| Zn | -0.7968387 | 2.5109321 | -1.8539201 |
| C  | 1.9749653  | 4.7225788 | -0.3445472 |
| C  | 2.8180445  | 4.2418804 | 0.8086997  |
| C  | 0.6724727  | 4.2972275 | -0.1436641 |
| C  | -0.5283107 | 4.3632127 | -0.9070538 |
| C  | 0.6723506  | 3.4435901 | 1.0899974  |
| O  | 1.9668906  | 3.3614773 | 1.5655241  |
| O  | -0.2631661 | 2.8870919 | 1.6154448  |
| H  | 3.1442376  | 5.0735570 | 1.4749377  |
| H  | -0.5899174 | 5.1100710 | -1.7159552 |
| H  | 2.3003322  | 5.5088003 | -1.0365379 |
| C  | 1.0300276  | 4.7293693 | -5.3217892 |

|   |            |            |            |
|---|------------|------------|------------|
| C | 1.1240881  | 3.8524346  | -4.2354130 |
| C | 2.2283833  | 3.9287898  | -3.3548354 |
| C | 3.2562082  | 4.8739709  | -3.6097639 |
| C | 3.1642097  | 5.7370830  | -4.7033301 |
| C | 2.0445896  | 5.6721690  | -5.5571000 |
| H | 0.1544050  | 4.6674385  | -5.9850690 |
| H | 0.3312831  | 3.1048110  | -4.0853365 |
| C | 2.3626769  | 3.0457010  | -2.2081319 |
| H | 4.1272917  | 4.9213848  | -2.9363831 |
| H | 3.9644104  | 6.4668903  | -4.8977194 |
| H | 1.9701248  | 6.3582919  | -6.4147783 |
| O | 1.5246059  | 2.1042684  | -1.9372813 |
| C | -1.7718914 | -1.3253741 | 1.9820498  |
| C | -2.0105590 | -2.6301946 | 1.5283890  |
| C | -2.0667637 | -3.6829421 | 2.5224262  |
| C | -2.1077347 | -5.0717647 | 2.1899924  |
| C | -2.0363564 | -3.3286388 | 3.9211826  |
| C | -2.1420962 | -4.3530211 | 4.9093521  |
| C | -1.8370268 | -1.9714973 | 4.2968580  |
| H | -1.7951171 | -1.7135224 | 5.3659885  |
| C | -1.6391455 | -0.9674272 | 3.3572412  |
| C | -0.8138491 | -3.0795552 | -2.0881699 |
| C | -1.7506360 | -3.9883383 | -2.5690344 |
| H | -1.6052532 | -4.4468863 | -3.5580598 |
| C | -2.9242399 | -4.3210340 | -1.8295868 |
| C | -3.9305342 | -5.1656292 | -2.3871294 |
| C | -3.1132020 | -3.7927708 | -0.4987445 |
| C | -4.3252356 | -4.0957132 | 0.1885685  |
| C | -2.0782524 | -2.9680319 | 0.0753555  |
| C | -1.0425967 | -2.5680154 | -0.7722427 |
| O | -1.7089015 | -0.2683507 | 1.0671811  |
| O | -0.0909585 | -1.6853586 | -0.2895691 |
| P | -0.4662549 | -0.1296128 | 0.0345308  |
| O | 0.8486231  | 0.3585592  | 0.6981269  |
| O | -0.9584213 | 0.6528777  | -1.1800704 |
| C | -2.2256837 | -5.6881227 | 4.5479821  |
| C | -2.1856158 | -6.0464595 | 3.1750783  |
| H | -2.1332346 | -4.0582499 | 5.9704483  |
| H | -2.2992182 | -6.4693583 | 5.3197289  |
| H | -2.0641575 | -5.3755080 | 1.1361943  |
| H | -2.2095149 | -7.1081621 | 2.8857044  |
| C | -5.2929124 | -4.9036603 | -0.3922071 |
| C | -5.0906867 | -5.4554961 | -1.6849552 |
| H | -4.4895584 | -3.6695764 | 1.1885855  |
| H | -6.2260878 | -5.1138407 | 0.1521988  |
| H | -5.8614055 | -6.1010571 | -2.1327617 |
| H | -3.7734616 | -5.5712014 | -3.3990184 |
| C | 0.0744081  | 0.6690231  | 4.2092888  |
| C | -1.2638231 | 0.4162406  | 3.7951458  |
| C | 0.3801782  | 1.9289233  | 4.7492201  |
| C | -2.2355495 | 1.4456820  | 3.8535242  |
| C | -1.8735555 | 2.6923819  | 4.3955277  |
| C | -0.5766737 | 2.9516930  | 4.8643950  |
| H | 1.4122733  | 2.1359935  | 5.0747546  |
| C | -3.6465003 | 1.2502721  | 3.3061887  |
| H | -2.6329487 | 3.4881040  | 4.4368148  |
| C | -3.8838556 | 2.1529819  | 2.0799481  |
| H | -3.8552759 | 3.2265502  | 2.3608984  |
| H | -4.8755253 | 1.9491996  | 1.6254347  |
| H | -3.1048479 | 1.9860252  | 1.3111301  |
| C | -4.7239549 | 1.4564079  | 4.3845773  |
| H | -3.7310036 | 0.1985368  | 2.9618811  |
| H | -4.7184483 | 2.4960532  | 4.7735747  |
| H | -4.5659754 | 0.7762948  | 5.2461721  |
| H | -5.7360093 | 1.2615723  | 3.9729491  |
| C | -0.1587195 | 4.3206691  | 5.3905102  |
| C | 0.3841202  | 5.1892238  | 4.2372323  |
| H | 0.7377926  | 6.1737903  | 4.6093263  |
| H | -0.4089700 | 5.3693543  | 3.4815260  |
| H | 1.2247835  | 4.6840061  | 3.7217220  |
| C | -1.2642749 | 5.0547718  | 6.1618936  |

|   |            |            |            |
|---|------------|------------|------------|
| H | 0.6838325  | 4.1457394  | 6.0969632  |
| H | -0.8696086 | 5.9847662  | 6.6198095  |
| H | -1.6860940 | 4.4240670  | 6.9702687  |
| H | -2.1004721 | 5.3528188  | 5.4955316  |
| C | 1.1788908  | -0.3781756 | 4.0543660  |
| C | 2.4936729  | 0.2234277  | 3.5239007  |
| H | 3.1826777  | -0.5818895 | 3.1959720  |
| H | 3.0242490  | 0.8079429  | 4.3044142  |
| H | 2.3123770  | 0.8967314  | 2.6660414  |
| C | 1.4311940  | -1.1462187 | 5.3654245  |
| H | 0.8285526  | -1.1106759 | 3.2967282  |
| H | 2.2340912  | -1.9011968 | 5.2327279  |
| H | 0.5239301  | -1.6752733 | 5.7168787  |
| H | 1.7477368  | -0.4505699 | 6.1707856  |
| H | 3.6448641  | -0.7676990 | -5.8767875 |
| H | 3.6446767  | -4.6960935 | -1.9670818 |
| H | -2.2078842 | -2.7585867 | -6.4218850 |
| C | 3.8034537  | -0.6555681 | -4.7803566 |
| H | 2.8954242  | -3.5298855 | 0.9287708  |
| H | 4.5380286  | 1.4055042  | -5.0271186 |
| H | -2.4338935 | -0.2840548 | -5.7133424 |
| C | 2.6387536  | -1.3719544 | -4.1042836 |
| C | 2.6567659  | -4.9005159 | -1.5041672 |
| C | 3.7597284  | 0.8520065  | -4.4617375 |
| H | 3.9461402  | 1.0152671  | -3.3798780 |
| C | 2.7781363  | -2.0916551 | -2.9054784 |
| C | -1.2104362 | -2.7955000 | -5.9369367 |
| H | 5.2236409  | -2.3312165 | -4.6306799 |
| C | 1.3567209  | -1.3055434 | -4.6742040 |
| C | 5.1810653  | -1.2395864 | -4.4418643 |
| H | 5.9680975  | -0.7547848 | -5.0542079 |
| H | 1.2335716  | -0.7662554 | -5.6270679 |
| C | 2.7923771  | -2.8818898 | 0.0345155  |
| H | 2.8203496  | -5.5768585 | -0.6396134 |
| H | 2.0410605  | -5.4395234 | -2.2522511 |
| C | 1.6853804  | -2.7149350 | -2.2731780 |
| C | -1.4025581 | -0.3491111 | -5.3112412 |
| C | 0.2236331  | -1.8860859 | -4.0753776 |
| H | -1.0361756 | -3.8322121 | -5.5836184 |
| H | -0.4469999 | -2.5851921 | -6.7152567 |
| C | 1.9714659  | -3.5944734 | -1.0540643 |
| C | 0.3821150  | -2.5851293 | -2.8414222 |
| C | -1.1195304 | -1.7657026 | -4.7928459 |
| H | 2.3014988  | -1.9436797 | 0.3597654  |
| H | -1.3202054 | 0.4053991  | -4.5061843 |
| H | 3.8169557  | -2.6301964 | -0.3083614 |
| H | 2.7745270  | 1.2937378  | -4.7106942 |
| H | -0.7161195 | -0.0559142 | -6.1330556 |
| H | 5.4444986  | -1.0647138 | -3.3778292 |
| H | 1.0040322  | -3.8869476 | -0.6000886 |
| H | -1.9160673 | -2.0015173 | -4.0585449 |
| H | 3.7746584  | -2.1968099 | -2.4528566 |
| H | 3.3518833  | 3.0297795  | -1.7045903 |

|   |            |            |            |
|---|------------|------------|------------|
| C | 0.7455397  | 2.3315109  | 1.4318285  |
| C | 2.1447958  | 2.3714967  | 1.4574391  |
| C | 2.7890169  | 3.6617729  | 1.5331566  |
| C | 4.1991746  | 3.8385362  | 1.3904206  |
| C | 1.9746553  | 4.8366414  | 1.7272656  |
| C | 2.6020572  | 6.1136816  | 1.8463737  |
| C | 0.5578424  | 4.7109046  | 1.7383678  |
| H | -0.0525490 | 5.6187597  | 1.8590562  |
| C | -0.0795617 | 3.4918062  | 1.5333602  |
| C | 3.4744749  | -0.9470328 | 0.0546817  |
| C | 4.5588575  | -1.1708516 | 0.8966859  |
| H | 5.2162451  | -2.0313565 | 0.7050924  |
| C | 4.8137133  | -0.3582622 | 2.0370296  |
| C | 5.8663456  | -0.6733868 | 2.9485294  |
| C | 3.9665996  | 0.7779149  | 2.3036847  |
| C | 4.1712499  | 1.5058247  | 3.5140000  |
| C | 2.9359796  | 1.1153103  | 1.3523648  |
| C | 2.6943558  | 0.2242257  | 0.3018798  |
| O | 0.1037904  | 1.0952650  | 1.3446154  |
| O | 1.6591790  | 0.5059810  | -0.5952883 |
| P | 0.1346013  | 0.2504793  | -0.0623502 |
| O | -0.7682513 | 0.8997834  | -1.1279760 |
| O | -0.0936454 | -1.2205571 | 0.2976405  |
| C | 3.9781628  | 6.2441199  | 1.7389344  |
| C | 4.7779551  | 5.0962792  | 1.4907644  |
| H | 1.9654516  | 6.9979419  | 2.0073750  |
| H | 4.4502171  | 7.2345920  | 1.8259711  |
| H | 4.8328568  | 2.9644400  | 1.1882998  |
| H | 5.8668226  | 5.2044769  | 1.3707224  |
| C | 5.1894380  | 1.1603743  | 4.3920033  |
| C | 6.0568199  | 0.0730117  | 4.1016391  |
| H | 3.5020370  | 2.3434195  | 3.7546867  |
| H | 5.3210683  | 1.7303673  | 5.3243305  |
| H | 6.8657939  | -0.1856663 | 4.8017542  |
| H | 6.5125964  | -1.5370647 | 2.7265310  |
| C | -2.1164141 | 3.8825896  | 0.1176668  |
| C | -1.5622772 | 3.4147644  | 1.3418310  |
| C | -3.5161785 | 3.8538585  | -0.0386932 |
| C | -2.4064623 | 2.9098005  | 2.3707246  |
| C | -3.7959917 | 2.9040617  | 2.1590485  |
| C | -4.3747771 | 3.3882567  | 0.9698724  |
| H | -3.9588039 | 4.2221806  | -0.9778400 |
| C | -1.8146990 | 2.4837832  | 3.7151831  |
| H | -4.4514014 | 2.5238700  | 2.9562351  |
| C | -2.6586586 | 1.4615405  | 4.4888175  |
| H | -3.6079761 | 1.9023012  | 4.8591617  |
| H | -2.0983230 | 1.1049252  | 5.3764761  |
| H | -2.8975884 | 0.5832907  | 3.8614194  |
| C | -1.5415980 | 3.7226995  | 4.5928446  |
| H | -0.8403241 | 1.9966729  | 3.5025315  |
| H | -2.4906990 | 4.2486494  | 4.8255036  |
| H | -0.8687603 | 4.4447577  | 4.0901232  |
| H | -1.0692196 | 3.4279179  | 5.5528813  |
| C | -5.8866519 | 3.4288587  | 0.7709544  |
| C | -6.4629690 | 2.0339238  | 0.4705136  |
| H | -7.5587684 | 2.0892911  | 0.3003380  |
| H | -6.2797418 | 1.3395077  | 1.3166467  |
| H | -5.9894844 | 1.6019860  | -0.4328867 |
| C | -6.6146465 | 4.0915329  | 1.9527434  |
| H | -6.0681995 | 4.0582971  | -0.1280587 |
| H | -7.6973803 | 4.1994400  | 1.7348919  |
| H | -6.2043402 | 5.0986502  | 2.1689980  |
| H | -6.5244659 | 3.4859030  | 2.8785755  |
| C | -1.2520254 | 4.4870113  | -0.9921064 |
| C | -1.5681164 | 3.9435208  | -2.3938542 |
| H | -0.8832275 | 4.3950575  | -3.1408813 |
| H | -2.6052578 | 4.1703108  | -2.7135562 |
| H | -1.4344530 | 2.8468674  | -2.4358962 |
| C | -1.3614087 | 6.0249903  | -0.9785994 |
| H | -0.1970059 | 4.2230171  | -0.7767133 |
| H | -0.6927944 | 6.4748225  | -1.7417156 |

### 7.2.3.6 to 15o-ma

#### TS1-8-o; COSMO

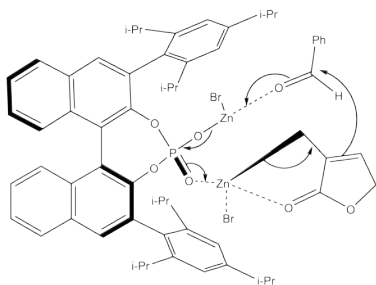

Energy(Hartree)= -11970.0080576

|    |            |            |            |
|----|------------|------------|------------|
| H  | -1.0888546 | 6.4499781  | 0.0078252  |
| H  | -2.3997402 | 6.3471773  | -1.2035610 |
| H  | 1.5696321  | -5.6495017 | -3.6319162 |
| H  | 4.8954966  | -0.8703164 | -4.5022893 |
| H  | 3.6674027  | -4.8742357 | 2.2451180  |
| C  | 1.8492780  | -4.7034517 | -4.1459134 |
| H  | 2.9936608  | 1.6378279  | -3.9215157 |
| H  | 0.2219631  | -4.9213524 | -5.6035419 |
| H  | 1.0971801  | -4.5773775 | 2.1474032  |
| C  | 2.3111735  | -3.7349711 | -3.0644157 |
| C  | 5.0005021  | -0.2804190 | -3.5675743 |
| C  | 0.5914587  | -4.1802607 | -4.8645169 |
| H  | 0.8051067  | -3.2383856 | -5.4117470 |
| C  | 2.7374735  | -2.4338328 | -3.3813374 |
| C  | 3.7481047  | -4.5712590 | 1.1807098  |
| H  | 3.8671879  | -5.4354349 | -4.6288733 |
| C  | 2.3012268  | -4.1051906 | -1.7104997 |
| C  | 2.9736289  | -5.0296588 | -5.1450285 |
| H  | 2.6351086  | -5.7786318 | -5.8908142 |
| H  | 1.9837869  | -5.1268601 | -1.4506361 |
| C  | 2.6211743  | 0.6196465  | -3.6855473 |
| H  | 5.4007938  | 0.7176739  | -3.8418716 |
| H  | 5.7530107  | -0.7900597 | -2.9319213 |
| C  | 3.1381189  | -1.5154236 | -2.3952400 |
| C  | 1.2415247  | -4.4538595 | 1.0559215  |
| C  | 2.6606482  | -3.2192103 | -0.6775081 |
| H  | 4.7142442  | -4.0471619 | 1.0484726  |
| H  | 3.7854253  | -5.4943777 | 0.5646173  |
| C  | 3.6512897  | -0.1455662 | -2.8360050 |
| C  | 3.0950883  | -1.9073748 | -1.0272369 |
| C  | 2.5483325  | -3.6945105 | 0.7727275  |
| H  | 1.6597950  | 0.7228252  | -3.1456621 |
| H  | 0.3611552  | -3.9121787 | 0.6535461  |
| H  | 2.4254933  | 0.1083954  | -4.6514017 |
| H  | -0.2252718 | -3.9756047 | -4.1433904 |
| H  | 1.2354602  | -5.4651595 | 0.5996233  |
| H  | 3.2904299  | -4.1240733 | -5.7035481 |
| H  | 3.8402305  | 0.4579593  | -1.9257837 |
| H  | 2.5406883  | -2.7955798 | 1.4226444  |
| H  | 2.7645457  | -2.1205827 | -4.4374229 |
| Zn | -2.4742097 | 0.3508951  | -1.8298709 |
| Br | -4.2527462 | 1.2564238  | -2.9837165 |
| C  | -1.9551833 | -6.5992416 | -2.1780523 |
| C  | -3.1892176 | -2.4966147 | -1.9492659 |
| C  | -1.0849492 | -5.6337945 | -1.6505449 |
| C  | -3.6246199 | -4.8822506 | -2.5763015 |
| C  | -2.7542788 | -3.9078753 | -2.0380199 |
| C  | -3.2260348 | -6.2199948 | -2.6501509 |
| C  | -1.4723468 | -4.2877099 | -1.5850601 |
| O  | -2.3034754 | -1.5842297 | -1.7294196 |
| H  | -1.6405532 | -7.6520099 | -2.2307538 |
| H  | -4.6190521 | -4.5791860 | -2.9419434 |
| H  | -0.0896263 | -5.9313467 | -1.2937679 |
| H  | -3.9030841 | -6.9727972 | -3.0789598 |
| H  | -0.7918354 | -3.5085522 | -1.2136126 |
| Br | 0.2142460  | -2.1981997 | 3.9207510  |
| Zn | -0.8957961 | -2.0276269 | 1.8864246  |
| H  | -5.2657372 | -0.8410769 | -1.2903560 |
| H  | -2.6432156 | -4.5057824 | 1.2476462  |
| C  | -4.4409610 | -2.6345517 | -0.2316071 |
| C  | -5.1591242 | -1.3010218 | -0.2850249 |
| H  | -4.9762318 | -3.5587616 | -0.4892118 |
| C  | -3.5432277 | -2.5612462 | 0.8611896  |
| C  | -2.6862782 | -3.4448573 | 1.5314913  |
| C  | -3.4157332 | -1.1102618 | 1.1665097  |
| O  | -4.3146607 | -0.3947093 | 0.4824596  |
| O  | -2.5439431 | -0.5831399 | 1.8652326  |
| H  | -6.1625194 | -1.3252468 | 0.1938698  |
| H  | -2.5336450 | -3.2557483 | 2.6153024  |
| H  | -4.0881850 | -2.2386318 | -2.5603700 |

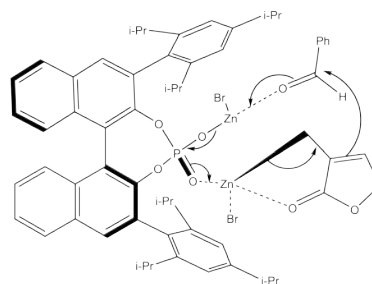

Energy(Hartree)= -11969.99555941  
number of imaginary frequencies: 1

|   |            |            |            |
|---|------------|------------|------------|
| C | 0.7450717  | 2.3294847  | 1.4356623  |
| C | 2.1441385  | 2.3704190  | 1.4574722  |
| C | 2.7875224  | 3.6610593  | 1.5314971  |
| C | 4.1971318  | 3.8385404  | 1.3877160  |
| C | 1.9726675  | 4.8352582  | 1.7262755  |
| C | 2.5997594  | 6.1119981  | 1.8440929  |
| C | 0.5562781  | 4.7080815  | 1.7394188  |
| H | -0.0558055 | 5.6148984  | 1.8591571  |
| C | -0.0811798 | 3.4888052  | 1.5367057  |
| C | 3.4703239  | -0.9483805 | 0.0520012  |
| C | 4.5565277  | -1.1710605 | 0.8917373  |
| H | 5.2126678  | -2.0319876 | 0.6977074  |
| C | 4.8146876  | -0.3586061 | 2.0309437  |
| C | 5.8686670  | -0.6730045 | 2.9403781  |
| C | 3.9682429  | 0.7775581  | 2.2989251  |
| C | 4.1755659  | 1.5060723  | 3.5081833  |
| C | 2.9352341  | 1.1143898  | 1.3500803  |
| C | 2.6907785  | 0.2229351  | 0.3004366  |
| O | 0.1044216  | 1.0923474  | 1.3513142  |
| O | 1.6530931  | 0.5046339  | -0.5948120 |
| P | 0.1310303  | 0.2504510  | -0.0559037 |
| O | -0.7761130 | 0.9080967  | -1.1143130 |
| O | -0.0992045 | -1.2214300 | 0.2991123  |
| C | 3.9750814  | 6.2433127  | 1.7356145  |
| C | 4.7749314  | 5.0962727  | 1.4874966  |
| H | 1.9626989  | 6.9959353  | 2.0049690  |
| H | 4.4463983  | 7.2341611  | 1.8219011  |
| H | 4.8302873  | 2.9640827  | 1.1860147  |
| H | 5.8636403  | 5.2048055  | 1.3670848  |
| C | 5.1954757  | 1.1609948  | 4.3835657  |
| C | 6.0617211  | 0.0736950  | 4.0921630  |
| H | 3.5061716  | 2.3433056  | 3.7492279  |
| H | 5.3286667  | 1.7312040  | 5.3154712  |
| H | 6.8716617  | -0.1852683 | 4.7909212  |
| H | 6.5136401  | -1.5374905 | 2.7177604  |
| C | -2.1175168 | 3.8773749  | 0.1197414  |
| C | -1.5637832 | 3.4107843  | 1.3446427  |
| C | -3.5169808 | 3.8474897  | -0.0371620 |
| C | -2.4078174 | 2.9062093  | 2.3737389  |
| C | -3.7971537 | 2.9001789  | 2.1611937  |
| C | -4.3755567 | 3.3830495  | 0.9715669  |
| H | -3.9594799 | 4.2145232  | -0.9768506 |
| C | -1.8163029 | 2.4812194  | 3.7187500  |
| H | -4.4523039 | 2.5212739  | 2.9592292  |
| C | -2.6600892 | 1.4598137  | 4.4934257  |
| H | -3.6095749 | 1.9008947  | 4.8637864  |
| H | -2.0992199 | 1.1032946  | 5.3807797  |
| H | -2.8991182 | 0.5795576  | 3.8684981  |
| C | -1.5431405 | 3.7214500  | 4.5949989  |
| H | -0.8416038 | 1.9932304  | 3.5076696  |
| H | -2.4923711 | 4.2483176  | 4.8269646  |
| H | -0.8698630 | 4.4431840  | 4.0921804  |
| H | -1.0706331 | 3.4276096  | 5.5551681  |
| C | -5.8873985 | 3.4257350  | 0.7726082  |
| C | -6.4669198 | 2.0322985  | 0.4720439  |

TS1-8-o

|    |            |            |            |
|----|------------|------------|------------|
| H  | -7.5624903 | 2.0894484  | 0.3015988  |
| H  | -6.2858118 | 1.3381670  | 1.3189329  |
| H  | -5.9946655 | 1.6005188  | -0.4321186 |
| C  | -6.6139091 | 4.0911147  | 1.9535983  |
| H  | -6.0676195 | 4.0546839  | -0.1269895 |
| H  | -7.6964704 | 4.2014431  | 1.7365965  |
| H  | -6.2007051 | 5.0970190  | 2.1690646  |
| H  | -6.5251342 | 3.4866771  | 2.8803363  |
| C  | -1.2538667 | 4.4836474  | -0.9897708 |
| C  | -1.5692343 | 3.9418167  | -2.3923761 |
| H  | -0.8847563 | 4.3943091  | -3.1390277 |
| H  | -2.6062844 | 4.1668416  | -2.7135656 |
| H  | -1.4336851 | 2.8455126  | -2.4369948 |
| C  | -1.3663079 | 6.0214160  | -0.9750213 |
| H  | -0.1982108 | 4.2214774  | -0.7748315 |
| H  | -0.6987370 | 6.4737502  | -1.7374867 |
| H  | -1.0950274 | 6.4463022  | 0.0116494  |
| H  | -2.4052128 | 6.3422278  | -1.1988854 |
| H  | 1.5855688  | -5.6615609 | -3.6311843 |
| H  | 4.8956504  | -0.8734654 | -4.4999977 |
| H  | 3.6687605  | -4.8696850 | 2.2496695  |
| C  | 1.8626497  | -4.7146257 | -4.1458387 |
| H  | 2.9851726  | 1.6325973  | -3.9261007 |
| H  | 0.2412647  | -4.9433005 | -5.6087864 |
| H  | 1.0986642  | -4.5822812 | 2.1477093  |
| C  | 2.3166806  | -3.7424512 | -3.0644483 |
| C  | 4.9963361  | -0.2818139 | -3.5660780 |
| C  | 0.6049593  | -4.1994255 | -4.8698986 |
| H  | 0.8156051  | -3.2574411 | -5.4180555 |
| C  | 2.7384445  | -2.4402448 | -3.3818981 |
| C  | 3.7504851  | -4.5689482 | 1.1848997  |
| H  | 3.8858730  | -5.4375269 | -4.6191207 |
| C  | 2.3059718  | -4.1106951 | -1.7103406 |
| C  | 2.9923203  | -5.0378484 | -5.1394678 |
| H  | 2.6610638  | -5.7896226 | -5.8854850 |
| H  | 1.9934042  | -5.1338812 | -1.4497227 |
| C  | 2.6150811  | 0.6136093  | -3.6901162 |
| H  | 5.3956596  | 0.7164774  | -3.8410479 |
| H  | 5.7480522  | -0.7894961 | -2.9282875 |
| C  | 3.1347083  | -1.5194719 | -2.3967147 |
| C  | 1.2445603  | -4.4622331 | 1.0561708  |
| C  | 2.6607340  | -3.2229412 | -0.6776266 |
| H  | 4.7151431  | -4.0418600 | 1.0536248  |
| H  | 3.7937129  | -5.4929391 | 0.5704257  |
| C  | 3.6451276  | -0.1487710 | -2.8381917 |
| C  | 3.0913758  | -1.9102154 | -1.0286044 |
| C  | 2.5482777  | -3.6972963 | 0.7730026  |
| H  | 1.6522676  | 0.7155817  | -3.1529025 |
| H  | 0.3623110  | -3.9249854 | 0.6517612  |
| H  | 2.4216187  | 0.1019505  | -4.6560967 |
| H  | -0.2158141 | -3.9961460 | -4.1534571 |
| H  | 1.2439525  | -5.4752771 | 0.6025769  |
| H  | 3.3077842  | -4.1318905 | -5.6981723 |
| H  | 3.8308373  | 0.4561287  | -1.9282818 |
| H  | 2.5351615  | -2.7984026 | 1.4229643  |
| H  | 2.7656828  | -2.1276523 | -4.4381102 |
| Zn | -2.4838198 | 0.3739953  | -1.8136659 |
| Br | -4.2541288 | 1.2479495  | -2.9903655 |
| C  | -1.9558047 | -6.5826263 | -2.1743578 |
| C  | -3.1837258 | -2.4769174 | -1.9597523 |
| C  | -1.0855693 | -5.6151288 | -1.6479290 |
| C  | -3.6221910 | -4.8652596 | -2.5833710 |
| C  | -2.7524418 | -3.8886856 | -2.0453559 |
| C  | -3.2253779 | -6.2042833 | -2.6514849 |
| C  | -1.4715129 | -4.2677631 | -1.5874007 |
| O  | -2.3031814 | -1.5666782 | -1.7296065 |
| H  | -1.6421193 | -7.6366496 | -2.2229013 |
| H  | -4.6151282 | -4.5619743 | -2.9547934 |
| H  | -0.0904154 | -5.9100912 | -1.2874647 |
| H  | -3.9022754 | -6.9591439 | -3.0796937 |
| H  | -0.7903265 | -3.4867701 | -1.2173446 |

|    |            |            |            |
|----|------------|------------|------------|
| Br | 0.2094298  | -2.2299777 | 3.9166604  |
| Zn | -0.8937900 | -2.0308161 | 1.8918373  |
| H  | -5.2641835 | -0.8243958 | -1.2870101 |
| H  | -2.6526970 | -4.4992601 | 1.2431810  |
| C  | -4.4493449 | -2.6228743 | -0.2271817 |
| C  | -5.1617347 | -1.2870277 | -0.2821873 |
| H  | -4.9805389 | -3.5465417 | -0.4929994 |
| C  | -3.5499826 | -2.5536977 | 0.8633262  |
| C  | -2.6932755 | -3.4394086 | 1.5310249  |
| C  | -3.4179930 | -1.1036819 | 1.1708524  |
| O  | -4.3176613 | -0.3853477 | 0.4871690  |
| O  | -2.5461220 | -0.5791355 | 1.8685403  |
| H  | -6.1670344 | -1.3055190 | 0.1931290  |
| H  | -2.5347357 | -3.2539938 | 2.6142312  |
| H  | -4.0850265 | -2.2155556 | -2.5667140 |

### 7.2.3.7 to 15c-ma

#### TS1-8-c; woelfling data

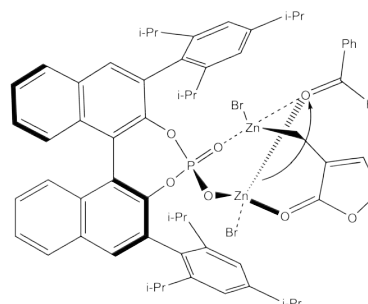

Energy(Hartree)= -11970.00369

|   |           |           |           |
|---|-----------|-----------|-----------|
| C | 0.971506  | 2.538247  | 1.097607  |
| C | 2.367186  | 2.539628  | 0.994153  |
| C | 3.028616  | 3.819921  | 0.921883  |
| C | 4.423740  | 3.948213  | 0.648880  |
| C | 2.252876  | 5.025705  | 1.095463  |
| C | 2.912095  | 6.290169  | 1.045995  |
| C | 0.842683  | 4.937430  | 1.282633  |
| H | 0.268688  | 5.862582  | 1.444240  |
| C | 0.179150  | 3.718530  | 1.244503  |
| C | 3.482745  | -0.916820 | -0.272496 |
| C | 4.584198  | -1.157207 | 0.541117  |
| H | 5.174379  | -2.072790 | 0.389267  |
| C | 4.947159  | -0.282394 | 1.604783  |
| C | 6.025382  | -0.602363 | 2.482527  |
| C | 4.194868  | 0.928611  | 1.828986  |
| C | 4.518707  | 1.727581  | 2.964859  |
| C | 3.125677  | 1.255917  | 0.919469  |
| C | 2.787891  | 0.312943  | -0.053444 |
| O | 0.282651  | 1.336237  | 1.130190  |
| O | 1.696701  | 0.590004  | -0.881427 |
| P | 0.243684  | 0.334069  | -0.181845 |
| O | -0.747489 | 0.838138  | -1.254711 |
| O | 0.108961  | -1.058254 | 0.412104  |
| C | 4.273920  | 6.377336  | 0.801023  |
| C | 5.030239  | 5.194594  | 0.587889  |
| H | 2.309986  | 7.201257  | 1.189589  |
| H | 4.766958  | 7.360223  | 0.755933  |
| H | 5.017756  | 3.040655  | 0.474537  |
| H | 6.106114  | 5.265038  | 0.366571  |
| C | 5.561749  | 1.377145  | 3.810815  |
| C | 6.333864  | 0.211834  | 3.561297  |
| H | 3.919437  | 2.624274  | 3.175324  |
| H | 5.786251  | 2.003716  | 4.687451  |

|   |           |           |           |    |           |           |           |
|---|-----------|-----------|-----------|----|-----------|-----------|-----------|
| H | 7.163159  | -0.052362 | 4.235023  | H  | 2.228681  | 0.121774  | -4.940935 |
| H | 6.597421  | -1.524671 | 2.295362  | H  | -0.739712 | -4.180099 | -3.677717 |
| C | -2.156857 | 3.731104  | 0.251198  | H  | 1.048323  | -5.300710 | 0.477873  |
| C | -1.306241 | 3.564088  | 1.381792  | H  | 2.200113  | -3.825356 | -6.125458 |
| C | -3.538599 | 3.506462  | 0.409424  | H  | 3.799421  | 0.422879  | -2.296851 |
| C | -1.851149 | 3.183685  | 2.636145  | H  | 2.674815  | -2.783137 | 1.197396  |
| C | -3.239747 | 2.966723  | 2.737815  | H  | 2.388224  | -2.106495 | -4.676652 |
| C | -4.104490 | 3.126455  | 1.642739  | Zn | -2.647761 | 0.621325  | -1.392339 |
| H | -4.212652 | 3.655727  | -0.449817 | Br | -4.029043 | 0.267803  | -3.197352 |
| C | -0.973237 | 3.056530  | 3.882354  | H  | -4.830553 | -3.560169 | -0.135059 |
| H | -3.655212 | 2.676944  | 3.715712  | Br | 1.478545  | -1.548024 | 3.589286  |
| C | -0.943116 | 1.630773  | 4.453911  | Zn | -0.474823 | -1.452804 | 2.297662  |
| H | -1.951662 | 1.290630  | 4.769936  | C  | -4.254023 | -2.852347 | 1.859158  |
| H | -0.280239 | 1.576352  | 5.341089  | C  | -5.050759 | -2.753810 | 0.601121  |
| H | -0.546040 | 0.907999  | 3.716777  | C  | -3.426720 | -1.766500 | 1.972382  |
| C | -1.385057 | 4.079588  | 4.957149  | C  | -2.401711 | -1.342783 | 2.920605  |
| H | 0.065044  | 3.304282  | 3.581578  | C  | -3.691803 | -0.962092 | 0.771136  |
| H | -2.410308 | 3.884166  | 5.335663  | O  | -4.645685 | -1.503082 | 0.001185  |
| H | -1.364553 | 5.114989  | 4.561160  | O  | -3.124757 | 0.104214  | 0.458760  |
| H | -0.695711 | 4.028021  | 5.825064  | H  | -6.152754 | -2.718629 | 0.747822  |
| C | -5.610829 | 2.904847  | 1.757741  | C  | -3.086683 | -6.501859 | -1.427368 |
| C | -5.981315 | 1.422951  | 1.554059  | C  | -2.564841 | -5.248469 | -1.097750 |
| H | -7.079344 | 1.278050  | 1.627485  | C  | -2.821331 | -4.145973 | -1.941296 |
| H | -5.502298 | 0.787388  | 2.329014  | C  | -3.603225 | -4.293580 | -3.103666 |
| H | -5.654160 | 1.055954  | 0.562193  | C  | -4.137738 | -5.548829 | -3.420860 |
| C | -6.205981 | 3.446702  | 3.067171  | C  | -3.875346 | -6.649273 | -2.585947 |
| H | -6.075780 | 3.474153  | 0.922264  | H  | -2.884807 | -7.370414 | -0.782363 |
| H | -7.312709 | 3.374059  | 3.049657  | H  | -1.952967 | -5.084207 | -0.196727 |
| H | -5.933363 | 4.508573  | 3.231300  | C  | -2.338745 | -2.807790 | -1.557521 |
| H | -5.858241 | 2.868798  | 3.948686  | H  | -3.799143 | -3.409974 | -3.733170 |
| C | -1.602033 | 4.232398  | -1.083468 | H  | -4.761087 | -5.671361 | -4.318908 |
| C | -2.325298 | 3.683315  | -2.316871 | H  | -4.290630 | -7.636318 | -2.839184 |
| H | -1.779883 | 3.945340  | -3.244701 | O  | -1.895207 | -2.546903 | -0.447165 |
| H | -3.361205 | 4.065976  | -2.417948 | H  | -2.482979 | -0.247957 | 3.083429  |
| H | -2.393286 | 2.576012  | -2.319189 | H  | -2.469773 | -1.866772 | 3.891966  |
| C | -1.624647 | 5.773575  | -1.141264 | H  | -4.326904 | -3.700109 | 2.552937  |
| H | -0.544295 | 3.899741  | -1.142657 | H  | -2.458444 | -2.009236 | -2.344220 |
| H | -1.196225 | 6.134514  | -2.099019 |    |           |           |           |
| H | -1.046959 | 6.229340  | -0.315633 |    |           |           |           |
| H | -2.667646 | 6.146877  | -1.070551 |    |           |           |           |
| H | 1.279312  | -5.633283 | -3.788113 |    |           |           |           |
| H | 4.622732  | -1.033223 | -4.886366 |    |           |           |           |
| H | 3.774391  | -4.932099 | 1.832619  |    |           |           |           |
| C | 1.324247  | -4.632956 | -4.273840 |    |           |           |           |
| H | 2.920429  | 1.620623  | -4.257504 |    |           |           |           |
| H | -0.602361 | -4.930704 | -5.297621 |    |           |           |           |
| H | 1.224317  | -4.493021 | 2.066506  |    |           |           |           |
| C | 1.941311  | -3.681337 | -3.255575 |    |           |           |           |
| C | 4.816752  | -0.430547 | -3.974461 |    |           |           |           |
| C | -0.122945 | -4.215939 | -4.596126 |    |           |           |           |
| H | -0.151922 | -3.208062 | -5.060953 |    |           |           |           |
| C | 2.419418  | -2.411205 | -3.618814 |    |           |           |           |
| C | 3.714418  | -4.628295 | 0.767085  |    |           |           |           |
| H | 3.205499  | -5.072153 | -5.324157 |    |           |           |           |
| C | 2.008115  | -4.036300 | -1.899739 |    |           |           |           |
| C | 2.162314  | -4.775898 | -5.553701 |    |           |           |           |
| H | 1.724242  | -5.542693 | -6.225308 |    |           |           |           |
| H | 1.639889  | -5.030947 | -1.600217 |    |           |           |           |
| C | 2.499425  | 0.629058  | -3.991292 |    |           |           |           |
| H | 5.270703  | 0.530498  | -4.294147 |    |           |           |           |
| H | 5.563296  | -0.978642 | -3.364616 |    |           |           |           |
| C | 2.947787  | -1.511444 | -2.676182 |    |           |           |           |
| C | 1.212841  | -4.318914 | 0.971517  |    |           |           |           |
| C | 2.512158  | -3.172145 | -0.909650 |    |           |           |           |
| H | 4.685594  | -4.171677 | 0.488712  |    |           |           |           |
| H | 3.601546  | -5.547537 | 0.153653  |    |           |           |           |
| C | 3.520050  | -0.186771 | -3.179107 |    |           |           |           |
| C | 2.989980  | -1.886743 | -1.302343 |    |           |           |           |
| C | 2.535195  | -3.661968 | 0.536504  |    |           |           |           |
| H | 1.571654  | 0.794048  | -3.409981 |    |           |           |           |
| H | 0.347182  | -3.669825 | 0.726582  |    |           |           |           |

### TS2-8-c; COSMO

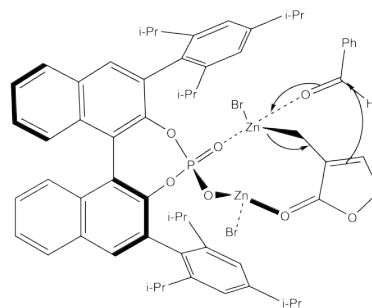

Energy(Hartree)= -11970.025845

|   |           |            |            |
|---|-----------|------------|------------|
| C | 1.0250582 | 2.5757538  | 0.8128087  |
| C | 2.4254358 | 2.5359899  | 0.8191049  |
| C | 3.1243800 | 3.7996450  | 0.8776269  |
| C | 4.5358210 | 3.9048172  | 0.6896466  |
| C | 2.3752840 | 5.0133734  | 1.0998821  |
| C | 3.0688704 | 6.2579805  | 1.1827325  |
| C | 0.9570467 | 4.9514106  | 1.2241613  |
| H | 0.4012804 | 5.8744730  | 1.4500306  |
| C | 0.2634108 | 3.7610440  | 1.0524384  |
| C | 3.5188654 | -0.9804102 | -0.3325836 |
| C | 4.5695577 | -1.2245765 | 0.5451779  |
| H | 5.1486166 | -2.1539119 | 0.4568826  |
| C | 4.8917705 | -0.3332953 | 1.6100384  |
| C | 5.9057013 | -0.6662707 | 2.5578533  |
| C | 4.1462302 | 0.8900889  | 1.7784445  |
| C | 4.3985467 | 1.6815051  | 2.9376827  |
| C | 3.1583114 | 1.2371152  | 0.7850002  |

|   |            |            |            |    |            |            |            |
|---|------------|------------|------------|----|------------|------------|------------|
| C | 2.8673480  | 0.2914241  | -0.1974405 | C  | 0.5111855  | -4.7473009 | -5.0013659 |
| O | 0.2860737  | 1.4085586  | 0.6490288  | H  | -0.3037889 | -5.2750936 | -5.5389422 |
| O | 1.9093182  | 0.6206363  | -1.1519730 | H  | 0.9060426  | -4.7544825 | -1.1991343 |
| P | 0.3246155  | 0.5984381  | -0.7814564 | C  | 2.7024956  | 0.4129695  | -4.2363146 |
| O | -0.2816117 | 1.4076977  | -1.9505614 | H  | 5.3640218  | -0.3219988 | -4.4986783 |
| O | -0.2765611 | -0.7759909 | -0.4815410 | H  | 5.3554799  | -1.7164090 | -3.3648720 |
| C | 4.4446944  | 6.3205623  | 1.0191889  | C  | 2.7138479  | -1.6089305 | -2.6482168 |
| C | 5.1787902  | 5.1334090  | 0.7554981  | C  | 1.6312960  | -4.5986456 | 1.2656369  |
| H | 2.4844178  | 7.1733544  | 1.3664338  | C  | 2.3279544  | -3.1729675 | -0.7790986 |
| H | 4.9666442  | 7.2877758  | 1.0786490  | H  | 4.8085271  | -4.0737550 | -0.1058348 |
| H | 5.1153564  | 2.9959289  | 0.4767376  | H  | 3.7702518  | -5.5174585 | -0.2090907 |
| H | 6.2667204  | 5.1871356  | 0.5969287  | C  | 3.5250031  | -0.4935982 | -3.3068062 |
| C | 5.3755892  | 1.3174685  | 3.8548700  | C  | 2.9138075  | -1.9680089 | -1.2821424 |
| C | 6.1509959  | 0.1443420  | 3.6564418  | C  | 2.7173765  | -3.7626807 | 0.5756469  |
| H | 3.7984333  | 2.5851582  | 3.1112592  | H  | 1.8129861  | 0.8207223  | -3.7178515 |
| H | 5.5442972  | 1.9403807  | 4.7466058  | H  | 0.6802925  | -4.0452972 | 1.3647931  |
| H | 6.9290989  | -0.1300597 | 4.3850264  | H  | 2.3562111  | -0.1270541 | -5.1421854 |
| H | 6.4757642  | -1.5972029 | 2.4109390  | H  | -1.5347659 | -2.6580663 | -3.0481741 |
| C | -2.0792832 | 3.9527878  | 0.0936106  | H  | 1.4217347  | -5.5443216 | 0.7221607  |
| C | -1.2256448 | 3.6577633  | 1.1900062  | H  | 0.9184031  | -3.9769400 | -5.6889447 |
| C | -3.4688952 | 3.8277468  | 0.2676093  | H  | 3.9427144  | 0.1449409  | -2.5022004 |
| C | -1.7735771 | 3.2122988  | 2.4241221  | H  | 2.9485575  | -2.9161080 | 1.2557325  |
| C | -3.1712820 | 3.0811728  | 2.5374669  | H  | 1.6315405  | -2.0424328 | -4.4686595 |
| C | -4.0380883 | 3.3796633  | 1.4724099  | Zn | -1.9944609 | 1.1067496  | -2.7685202 |
| H | -4.1441797 | 4.0591660  | -0.5717748 | Br | -2.6412168 | 0.6377179  | -4.9051635 |
| C | -0.8732790 | 2.9248796  | 3.6258871  | H  | -4.2167971 | -3.3191303 | -1.7683804 |
| H | -3.5908186 | 2.7251491  | 3.4887504  | Br | 0.9421796  | -1.0537844 | 3.0294865  |
| C | -1.3557293 | 1.7643080  | 4.5075125  | Zn | -0.6997345 | -1.4083262 | 1.4074879  |
| H | -2.3178034 | 1.9899633  | 5.0131875  | C  | -3.8644765 | -2.5088954 | 0.2666570  |
| H | -0.6089441 | 1.5579655  | 5.3001062  | C  | -4.4920936 | -2.4797090 | -1.0984344 |
| H | -1.4698511 | 0.8318594  | 3.9213746  | C  | -3.3749320 | -1.2019227 | 0.5331459  |
| C | -0.6793913 | 4.2080627  | 4.4584797  | C  | -2.7581739 | -0.6408223 | 1.6615208  |
| H | 0.1221773  | 2.6291075  | 3.2341551  | C  | -3.3909977 | -0.5143464 | -0.7755551 |
| H | -1.6488242 | 4.5564770  | 4.8729141  | O  | -3.9937977 | -1.2557958 | -1.7068983 |
| H | -0.2594202 | 5.0308534  | 3.8457439  | O  | -2.9252839 | 0.6080564  | -1.0447815 |
| H | 0.0117012  | 4.0261104  | 5.3074107  | H  | -5.6011209 | -2.4101686 | -1.0768365 |
| C | -5.5438695 | 3.1490041  | 1.5474797  | C  | -3.2446973 | -7.0396098 | 1.0352541  |
| C | -5.8971311 | 1.7901495  | 0.9064001  | C  | -2.7517117 | -5.7332420 | 1.1366885  |
| H | -6.9948384 | 1.6266685  | 0.8956810  | C  | -2.5645318 | -4.9525461 | -0.0253467 |
| H | -5.4291362 | 0.9597091  | 1.4758594  | C  | -2.8590186 | -5.5109112 | -1.2884975 |
| H | -5.5268331 | 1.7293475  | -0.1368561 | C  | -3.3516179 | -6.8217245 | -1.3872998 |
| C | -6.1272063 | 3.2559260  | 2.9622240  | C  | -3.5503756 | -7.5863221 | -0.2259990 |
| H | -6.0183139 | 3.9408821  | 0.9251525  | H  | -3.3871730 | -7.6434659 | 1.9447733  |
| H | -7.2338402 | 3.1950056  | 2.9303231  | H  | -2.4906911 | -5.2954947 | 2.1120854  |
| H | -5.8491937 | 4.2122818  | 3.4495309  | C  | -2.0246800 | -3.5692673 | 0.0788495  |
| H | -5.7755752 | 2.4286513  | 3.6135927  | H  | -2.6744866 | -4.9236146 | -2.2020256 |
| C | -1.5072271 | 4.3664130  | -1.2615194 | H  | -3.5708486 | -7.2508416 | -2.3769356 |
| C | -2.3515193 | 3.8626673  | -2.4460121 | H  | -3.9346717 | -8.6150630 | -0.3024820 |
| H | -1.7497832 | 3.7756407  | -3.3729282 | O  | -1.3572637 | -3.2427939 | 1.1290469  |
| H | -3.2088389 | 4.5265918  | -2.6813960 | H  | -2.5358903 | 0.4407958  | 1.6312106  |
| H | -2.8476626 | 2.8914303  | -2.2015208 | H  | -2.9797137 | -1.0715998 | 2.6510580  |
| C | -1.3139964 | 5.8903420  | -1.3746871 | H  | -4.2668929 | -3.1635268 | 1.0514428  |
| H | -0.5094172 | 3.8892653  | -1.3453880 | H  | -1.7496916 | -3.0980673 | -0.8960989 |
| H | -0.8968530 | 6.1628528  | -2.3662731 |    |            |            |            |
| H | -0.6198259 | 6.2681924  | -0.6002411 |    |            |            |            |
| H | -2.2826233 | 6.4181920  | -1.2509644 |    |            |            |            |
| H | -0.4105550 | -4.9340222 | -3.0644354 |    |            |            |            |
| H | 4.3841259  | -1.7803664 | -4.8684308 |    |            |            |            |
| H | 4.3685256  | -4.9660285 | 1.3915423  |    |            |            |            |
| C | -0.0097070 | -4.1133467 | -3.7000794 |    |            |            |            |
| H | 3.3202332  | 1.2655773  | -4.5856584 |    |            |            |            |
| H | -2.0147113 | -3.6353130 | -4.4781776 |    |            |            |            |
| H | 1.9687619  | -4.8784480 | 2.2840999  |    |            |            |            |
| C | 1.0929238  | -3.4363969 | -2.8978656 |    |            |            |            |
| C | 4.7266205  | -1.1125083 | -4.0501329 |    |            |            |            |
| C | -1.1611729 | -3.1278280 | -3.9814401 |    |            |            |            |
| H | -0.8379009 | -2.2984803 | -4.6437986 |    |            |            |            |
| C | 1.8074337  | -2.3471106 | -3.4253823 |    |            |            |            |
| C | 3.9916813  | -4.6201746 | 0.4064018  |    |            |            |            |
| H | 1.3194598  | -5.4779605 | -4.7965346 |    |            |            |            |
| C | 1.4123162  | -3.8619675 | -1.5983702 |    |            |            |            |

### TS2-8-c

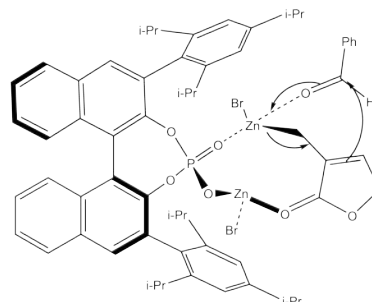

Energy(Hartree)= -11970.01360084  
number of imaginary frequencies: 1

C 1.0255706 2.5778898 0.8047574



|   |            |            |            |    |            |            |            |
|---|------------|------------|------------|----|------------|------------|------------|
| C | 2.4259450  | 2.5379927  | 0.8163732  | H  | -2.2636116 | 6.4114926  | -1.2518630 |
| C | 3.1243482  | 3.8016269  | 0.8813396  | H  | -0.4243517 | -4.9266372 | -3.0498490 |
| C | 4.5361203  | 3.9069659  | 0.6981162  | H  | 4.3748784  | -1.7967762 | -4.8645726 |
| C | 2.3755549  | 5.0146296  | 1.1072236  | H  | 4.3842679  | -4.9652949 | 1.3779405  |
| C | 3.0699882  | 6.2576245  | 1.1985184  | C  | -0.0204906 | -4.1097935 | -3.6885705 |
| C | 0.9572456  | 4.9518935  | 1.2268097  | H  | 3.3293708  | 1.2565759  | -4.5898773 |
| H | 0.3995783  | 5.8727804  | 1.4573520  | H  | -2.0221057 | -3.6293513 | -4.4769830 |
| C | 0.2639387  | 3.7628936  | 1.0462044  | H  | 1.9924817  | -4.8910403 | 2.2871242  |
| C | 3.5186533  | -0.9797283 | -0.3309832 | C  | 1.0828749  | -3.4327603 | -2.8873256 |
| C | 4.5675041  | -1.2234098 | 0.5488269  | C  | 4.7217710  | -1.1280099 | -4.0490728 |
| H | 5.1441059  | -2.1543802 | 0.4629342  | C  | -1.1689083 | -3.1233616 | -3.9779123 |
| C | 4.8898036  | -0.3314889 | 1.6126124  | H  | -0.8443106 | -2.2967912 | -4.6427356 |
| C | 5.9015387  | -0.6643014 | 2.5620293  | C  | 1.7985232  | -2.3459616 | -3.4175428 |
| C | 4.1452337  | 0.8924813  | 1.7790503  | C  | 3.9981660  | -4.6181189 | 0.3969235  |
| C | 4.3961149  | 1.6837596  | 2.9383676  | H  | 1.3100856  | -5.4802166 | -4.7754512 |
| C | 3.1594248  | 1.2396079  | 0.7834267  | C  | 1.4049552  | -3.8586373 | -1.5887940 |
| C | 2.8696494  | 0.2936742  | -0.1989823 | C  | 0.5019855  | -4.7512791 | -4.9855689 |
| O | 0.2849698  | 1.4124800  | 0.6374595  | H  | -0.3113892 | -5.2817262 | -5.5228992 |
| O | 1.9141888  | 0.6234906  | -1.1560777 | H  | 0.8993468  | -4.7507098 | -1.1877841 |
| P | 0.3298515  | 0.5979862  | -0.7902152 | C  | 2.7065965  | 0.4095181  | -4.2363989 |
| O | -0.2801403 | 1.4005313  | -1.9626980 | H  | 5.3633864  | -0.3430265 | -4.5011026 |
| O | -0.2727858 | -0.7763415 | -0.4909147 | H  | 5.3475971  | -1.7338786 | -3.3630841 |
| C | 4.4457960  | 6.3202378  | 1.0397699  | C  | 2.7092548  | -1.6099425 | -2.6439510 |
| C | 5.1794666  | 5.1343401  | 0.7724144  | C  | 1.6449187  | -4.6066369 | 1.2736431  |
| H | 2.4855780  | 7.1725215  | 1.3848074  | C  | 2.3250937  | -3.1721571 | -0.7728266 |
| H | 4.9680057  | 7.2868299  | 1.1058762  | H  | 4.8087122  | -4.0689760 | -0.1223953 |
| H | 5.1146085  | 2.9979934  | 0.4833541  | H  | 3.7748810  | -5.5144847 | -0.2189359 |
| H | 6.2679037  | 5.1878339  | 0.6177695  | C  | 3.5247570  | -0.5000082 | -3.3062453 |
| C | 5.3715582  | 1.3195229  | 3.8564714  | C  | 2.9113032  | -1.9681750 | -1.2780790 |
| C | 6.1461534  | 0.1463854  | 3.6599152  | C  | 2.7228307  | -3.7646601 | 0.5783402  |
| H | 3.7955341  | 2.5871569  | 3.1106920  | H  | 1.8219823  | 0.8268597  | -3.7176335 |
| H | 5.5387044  | 1.9424050  | 4.7484130  | H  | 0.6944602  | -4.0557611 | 1.3884616  |
| H | 6.9225135  | -0.1286867 | 4.3899831  | H  | 2.3548082  | -0.1296042 | -5.1406892 |
| H | 6.4698429  | -1.5965119 | 2.4168743  | H  | -1.5455539 | -2.6487518 | -3.0482800 |
| C | -2.0788494 | 3.9417488  | 0.0826680  | H  | 1.4311546  | -5.5497807 | 0.7273683  |
| C | -1.2250888 | 3.6584649  | 1.1822374  | H  | 0.9110250  | -3.9853211 | -5.6766669 |
| C | -3.4674474 | 3.8125535  | 0.2574483  | H  | 3.9468389  | 0.1378150  | -2.5033514 |
| C | -1.7719794 | 3.2243996  | 2.4202049  | H  | 2.9553397  | -1.9201304 | 1.2605608  |
| C | -3.1692790 | 3.0903517  | 2.5343589  | H  | 1.6214673  | -2.0418643 | -4.4607875 |
| C | -4.0359426 | 3.3742467  | 1.4660725  | Zn | -1.9789655 | 1.0504526  | -2.7807268 |
| H | -4.1431493 | 4.0347996  | -0.5840382 | Br | -2.6857703 | 0.6056524  | -4.8940403 |
| C | -0.8737954 | 2.9551374  | 3.6276303  | H  | -4.2537761 | -3.3109008 | -1.7344354 |
| H | -3.5872852 | 2.7442382  | 3.4900671  | Br | 0.9694221  | -1.0555161 | 3.0193411  |
| C | -1.3219015 | 1.7659934  | 4.4892154  | Zn | -0.6611457 | -1.4207934 | 1.4019301  |
| H | -2.3054265 | 1.9410036  | 4.9733463  | C  | -3.8654488 | -2.5018666 | 0.2915312  |
| H | -0.5860479 | 1.5875389  | 5.2984994  | C  | -4.5147320 | -2.4677564 | -1.0626279 |
| H | -1.3744920 | 0.8333035  | 3.8949224  | C  | -3.3634211 | -1.1992994 | 0.5524885  |
| C | -0.7360306 | 4.2357699  | 4.4747486  | C  | -2.7260544 | -0.6435631 | 1.6712146  |
| H | 0.1360117  | 2.7013836  | 3.2438702  | C  | -3.3935568 | -0.5119880 | -0.7567059 |
| H | -1.7212395 | 4.5458458  | 4.8821916  | O  | -4.0199464 | -1.2493924 | -1.6783165 |
| H | -0.3404381 | 5.0792705  | 3.8740122  | O  | -2.9203490 | 0.6030260  | -1.0387568 |
| H | -0.0475229 | 4.0712499  | 5.3291851  | H  | -5.6236961 | -2.3919628 | -1.0247484 |
| C | -5.5412192 | 3.1402552  | 1.5421938  | C  | -3.2301918 | -7.0394890 | 1.0047833  |
| C | -5.8927313 | 1.7798891  | 0.9035457  | C  | -2.7263037 | -5.7381087 | 1.1101843  |
| H | -6.9899471 | 1.6126724  | 0.8951998  | C  | -2.5592588 | -4.9456318 | -0.0467811 |
| H | -5.4205701 | 0.9515681  | 1.4726398  | C  | -2.8814240 | -5.4890416 | -1.3097037 |
| H | -5.5246266 | 1.7185639  | -0.1403962 | C  | -3.3848765 | -6.7951355 | -1.4117989 |
| C | -6.1243849 | 3.2484543  | 2.9567299  | C  | -3.5659399 | -7.5702325 | -0.2551432 |
| H | -6.0178134 | 3.9307902  | 0.9194555  | H  | -3.3564947 | -7.6530177 | 1.9101957  |
| H | -7.2309586 | 3.1866152  | 2.9264898  | H  | -2.4375318 | -5.3111937 | 2.0826008  |
| H | -5.8466728 | 4.2052793  | 3.4428684  | C  | -2.0109278 | -3.5669632 | 0.0630454  |
| H | -5.7719113 | 2.4223251  | 3.6090561  | H  | -2.7061726 | -4.8937110 | -2.2199252 |
| C | -1.5069124 | 4.3524559  | -1.2735130 | H  | -3.6252955 | -7.2134071 | -2.4011799 |
| C | -2.3565594 | 3.8596059  | -2.4583004 | H  | -3.9582233 | -8.5956650 | -0.3347276 |
| H | -1.7585051 | 3.7804740  | -3.3881792 | O  | -1.3386161 | -3.2478806 | 1.1087326  |
| H | -3.2132932 | 4.5283087  | -2.6831021 | H  | -2.4930521 | 0.4355398  | 1.6392589  |
| H | -2.8444358 | 2.8820957  | -2.2288374 | Br | -2.9320413 | -1.0738351 | 2.6641565  |
| C | -1.3006383 | 5.8750273  | -1.3822129 | H  | -4.2464605 | -3.1645605 | 1.0800393  |
| H | -0.5135161 | 3.8665844  | -1.3607293 | H  | -1.7534842 | -3.0821519 | -0.9100528 |
| H | -0.8852462 | 6.1481641  | -2.3744045 |    |            |            |            |
| H | -0.5991777 | 6.2439759  | -0.6103395 |    |            |            |            |

int1-8-c; COSMO

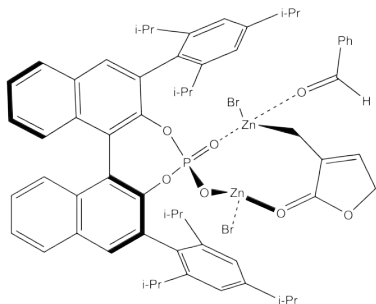

Energy(Hartree)= -11970.03438611

|   |            |            |            |
|---|------------|------------|------------|
| C | 0.9195491  | 2.5155817  | 0.7373087  |
| C | 2.3190306  | 2.5480116  | 0.7239383  |
| C | 2.9574358  | 3.8372616  | 0.5912992  |
| C | 4.3633227  | 3.9828347  | 0.3873168  |
| C | 2.1479327  | 5.0324391  | 0.6268514  |
| C | 2.7789146  | 6.3080407  | 0.5164114  |
| C | 0.7345023  | 4.9203015  | 0.7658711  |
| H | 0.1331755  | 5.8382693  | 0.8552193  |
| C | 0.1000987  | 3.6849696  | 0.7973502  |
| C | 3.6785506  | -0.9378897 | -0.1743973 |
| C | 4.7382040  | -1.0474533 | 0.7185426  |
| H | 5.4016229  | -1.9229829 | 0.6669455  |
| C | 4.9710078  | -0.0783189 | 1.7373031  |
| C | 6.0025182  | -0.2649114 | 2.7057669  |
| C | 4.1379916  | 1.0975137  | 1.8169839  |
| C | 4.3419483  | 2.0017177  | 2.9008666  |
| C | 3.1168725  | 1.2909435  | 0.8177782  |
| C | 2.8868932  | 0.2506055  | -0.0828322 |
| O | 0.2558607  | 1.2938135  | 0.7719316  |
| O | 1.8635777  | 0.3988627  | -1.0128555 |
| P | 0.3079227  | 0.2943663  | -0.5362774 |
| O | -0.4307264 | 0.8825494  | -1.7650491 |
| O | -0.1460653 | -1.0695797 | -0.0318784 |
| C | 4.1508916  | 6.4132700  | 0.3435961  |
| C | 4.9443599  | 5.2376066  | 0.2643877  |
| H | 2.1488285  | 7.2105066  | 0.5589332  |
| H | 4.6241878  | 7.4029390  | 0.2537220  |
| H | 4.9891727  | 3.0828051  | 0.3146726  |
| H | 6.0294897  | 5.3205023  | 0.0991380  |
| C | 5.3419774  | 1.7806146  | 3.8382154  |
| C | 6.1905067  | 0.6463190  | 3.7344318  |
| H | 3.6842609  | 2.8769583  | 2.9985131  |
| H | 5.4727330  | 2.4867270  | 4.6725506  |
| H | 6.9841042  | 0.4842125  | 4.4798008  |
| H | 6.6375664  | -1.1617165 | 2.6299341  |
| C | -2.2852463 | 3.5750579  | -0.0893973 |
| C | -1.3783988 | 3.5469920  | 1.0061933  |
| C | -3.6597289 | 3.4460714  | 0.1702065  |
| C | -1.8635557 | 3.3665680  | 2.3278319  |
| C | -3.2500679 | 3.2055997  | 2.5290348  |
| C | -4.1678512 | 3.2469659  | 1.4681138  |
| H | -4.3742713 | 3.4865803  | -0.6678291 |
| C | -0.9252911 | 3.3400205  | 3.5345721  |
| H | -3.6142351 | 3.0489840  | 3.5550109  |
| C | -0.8237963 | 1.9355564  | 4.1556694  |
| H | -1.8108168 | 1.5820623  | 4.5213918  |
| H | -0.1267265 | 1.9408902  | 5.0188225  |
| H | -0.4412325 | 1.1906509  | 3.4313495  |
| C | -1.3189770 | 4.3965430  | 4.5827441  |
| H | 0.0884459  | 3.6083378  | 3.1738149  |
| H | -2.3080696 | 4.1780969  | 5.0371465  |
| H | -1.3700570 | 5.4107588  | 4.1363477  |
| H | -0.5760169 | 4.4200781  | 5.4064220  |
| C | -5.6692106 | 3.0444512  | 1.6567984  |
| C | -6.0864812 | 1.6341649  | 1.1911579  |
| H | -7.1868676 | 1.5036178  | 1.2548682  |

|    |            |            |            |
|----|------------|------------|------------|
| H  | -5.6114329 | 0.8599072  | 1.8287612  |
| H  | -5.7805516 | 1.4433495  | 0.1427305  |
| C  | -6.1652954 | 3.3126287  | 3.0828189  |
| H  | -6.1710999 | 3.7748877  | 0.9822737  |
| H  | -7.2720817 | 3.2600086  | 3.1241682  |
| H  | -5.8558090 | 4.3138565  | 3.4447584  |
| H  | -5.7763275 | 2.5580500  | 3.7983243  |
| C  | -1.7845930 | 3.7447898  | -1.5226558 |
| C  | -2.6456863 | 2.9964598  | -2.5576601 |
| H  | -2.0703654 | 2.7694446  | -3.4776297 |
| H  | -3.5430106 | 3.5697812  | -2.8700377 |
| H  | -3.0783974 | 2.0616815  | -2.1235115 |
| C  | -1.6664002 | 5.2283543  | -1.9205720 |
| H  | -0.7701370 | 3.3001131  | -1.5623334 |
| H  | -1.2954362 | 5.3303283  | -2.9615795 |
| H  | -0.9636115 | 5.7676193  | -1.2568752 |
| H  | -2.6529728 | 5.7330486  | -1.8546162 |
| H  | 1.6121911  | -5.7908829 | -3.6348454 |
| H  | 5.0082777  | -1.3647090 | -4.6943562 |
| H  | 4.3918763  | -4.8580477 | 1.9655919  |
| C  | 1.3647935  | -4.7519843 | -3.9502358 |
| H  | 3.3170945  | 1.3603677  | -4.3391160 |
| H  | -0.7438401 | -5.2554836 | -4.3544151 |
| H  | 1.8475813  | -4.6859043 | 2.3297633  |
| C  | 2.1343873  | -3.8157395 | -3.0252081 |
| C  | 5.1660470  | -0.6916724 | -3.8253414 |
| C  | -0.1504486 | -4.5542986 | -3.7307020 |
| H  | -0.4551467 | -3.5185424 | -3.9921227 |
| C  | 2.6537960  | -2.5834102 | -3.4514012 |
| C  | 4.2471205  | -4.5803000 | 0.9007289  |
| H  | 2.8183522  | -4.7151156 | -5.6018625 |
| C  | 2.2751977  | -4.1461671 | -1.6662019 |
| C  | 1.7267907  | -4.6146997 | -5.4343410 |
| H  | 1.2139683  | -5.3953318 | -6.0320669 |
| H  | 1.9063622  | -5.1266288 | -1.3248312 |
| C  | 2.8721437  | 0.3879694  | -4.0427679 |
| H  | 5.6429840  | 0.2386575  | -4.1986653 |
| H  | 5.8779946  | -1.1925436 | -3.1381351 |
| C  | 3.2281240  | -1.6647076 | -2.5537431 |
| C  | 1.7454186  | -4.4970692 | 1.2423252  |
| C  | 2.8369500  | -3.2675605 | -0.7227432 |
| H  | 5.1567283  | -4.0466483 | 0.5583377  |
| H  | 4.1778323  | -5.5182627 | 0.3097310  |
| C  | 3.8327639  | -0.3786749 | -3.1175254 |
| C  | 3.2827085  | -1.9855469 | -1.1670903 |
| C  | 2.9716560  | -3.7315111 | 0.7264313  |
| H  | 1.9076863  | 0.5883387  | -3.5369435 |
| H  | 0.8246187  | -3.9045384 | 1.0977085  |
| H  | 2.6644552  | -0.1736804 | -4.9775637 |
| H  | -0.4265533 | -4.7245449 | -2.6707295 |
| H  | 1.6158121  | -5.4799250 | 0.7420499  |
| H  | 1.4094941  | -3.6325488 | -5.8429987 |
| H  | 4.0742884  | 0.2893861  | -2.2665000 |
| H  | 3.0610738  | -2.8289537 | 1.3644114  |
| H  | 2.6012729  | -2.3135031 | -4.5162585 |
| Zn | -2.1515618 | 0.2144806  | -2.2916601 |
| Br | -2.8402156 | -1.0157248 | -4.0972355 |
| H  | -5.3753234 | -3.2280992 | -0.1762737 |
| Br | 1.1372194  | -1.4580014 | 3.2673865  |
| Zn | -0.7926829 | -1.4767193 | 1.9101306  |
| C  | -4.6848513 | -2.0919929 | 1.5760089  |
| C  | -5.4166484 | -2.2153291 | 0.2843409  |
| C  | -3.6807140 | -1.1591873 | 1.4641665  |
| C  | -2.6311700 | -0.6767300 | 2.3493762  |
| C  | -3.7490936 | -0.7101155 | 0.0623452  |
| O  | -4.7398328 | -1.3050495 | -0.6150170 |
| O  | -2.9902396 | 0.1134705  | -0.4860562 |
| H  | -6.4847032 | -1.9071047 | 0.3326838  |
| C  | -4.1033959 | -6.5136029 | -0.1926294 |
| C  | -3.2050557 | -5.5631389 | 0.2993170  |
| C  | -2.8217287 | -4.4725995 | -0.5179820 |

|   |            |            |            |
|---|------------|------------|------------|
| C | -3.3482697 | -4.3418187 | -1.8250446 |
| C | -4.2525641 | -5.2966322 | -2.3097251 |
| C | -4.6264207 | -6.3806795 | -1.4961676 |
| H | -4.4034692 | -7.3665547 | 0.4347832  |
| H | -2.7833331 | -5.6380473 | 1.3130395  |
| C | -1.9100866 | -3.4403026 | -0.0255418 |
| H | -3.0561800 | -3.4816178 | -2.4505916 |
| H | -4.6663475 | -5.1961932 | -3.3242602 |
| H | -5.3339119 | -7.1325641 | -1.8788028 |
| O | -1.4572392 | -3.4002321 | 1.1299254  |
| H | -2.4552031 | 0.4078571  | 2.1987812  |
| H | -2.8356118 | -0.8881557 | 3.4157876  |
| H | -4.9428191 | -2.6762452 | 2.4692128  |
| H | -1.6223130 | -2.6409949 | -0.7553003 |

### int1-8-c

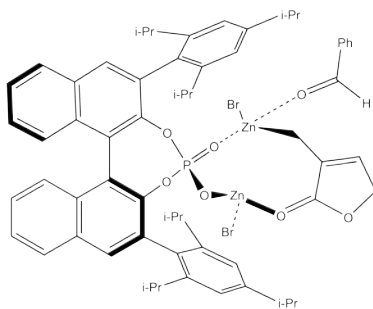

Energy(Hartree) = -11970.021639

|   |            |            |            |
|---|------------|------------|------------|
| C | 0.9186843  | 2.5191860  | 0.7243719  |
| C | 2.3180922  | 2.5535505  | 0.7183068  |
| C | 2.9544339  | 3.8448225  | 0.5975969  |
| C | 4.3609628  | 3.9935982  | 0.4029195  |
| C | 2.1431791  | 5.0384302  | 0.6376065  |
| C | 2.7733551  | 6.3148571  | 0.5395654  |
| C | 0.7297271  | 4.9226798  | 0.7703300  |
| H | 0.1254513  | 5.8381235  | 0.8662741  |
| C | 0.0969554  | 3.6864503  | 0.7903601  |
| C | 3.6785726  | -0.9338651 | -0.1768794 |
| C | 4.7314571  | -1.0452482 | 0.7235610  |
| H | 5.3905519  | -1.9241388 | 0.6776722  |
| C | 4.9612311  | -0.0767607 | 1.7430123  |
| C | 5.9848317  | -0.2667490 | 2.7184162  |
| C | 4.1308541  | 1.1009070  | 1.8181525  |
| C | 4.3292287  | 2.0029053  | 2.9045018  |
| C | 3.1171353  | 1.2971944  | 0.8118909  |
| C | 2.8923145  | 0.2586289  | -0.0917516 |
| O | 0.2549857  | 1.2969116  | 0.7463660  |
| O | 1.8760910  | 0.4119595  | -1.0304215 |
| P | 0.3188461  | 0.3057157  | -0.5664778 |
| O | -0.4149195 | 0.8998017  | -1.7977824 |
| O | -0.1493487 | -1.0595434 | -0.0773423 |
| C | 4.1455527  | 6.4231524  | 0.3752015  |
| C | 4.9406741  | 5.2495795  | 0.2924020  |
| H | 2.1419092  | 7.2162364  | 0.5849498  |
| H | 4.6178093  | 7.4140965  | 0.2950917  |
| H | 4.9873234  | 3.0941396  | 0.3291414  |
| H | 6.0266013  | 5.3349010  | 0.1342453  |
| C | 5.3223401  | 1.7784098  | 3.8476660  |
| C | 6.1682651  | 0.6425868  | 3.7487396  |
| H | 3.6720130  | 2.8786497  | 2.9988951  |
| H | 5.4485883  | 2.4830439  | 4.6838148  |
| H | 6.9554101  | 0.4768783  | 4.5000020  |
| H | 6.6164122  | -1.1662489 | 2.6469392  |
| C | -2.2900866 | 3.5705492  | -0.0940433 |
| C | -1.3810874 | 3.5437252  | 0.9997342  |
| C | -3.6631418 | 3.4356529  | 0.1684376  |

|   |            |            |            |
|---|------------|------------|------------|
| C | -1.8627321 | 3.3593039  | 2.3220416  |
| C | -3.2481348 | 3.1933753  | 2.5254582  |
| C | -4.1679218 | 3.2334614  | 1.4668058  |
| H | -4.3794298 | 3.4756467  | -0.6681190 |
| C | -0.9227494 | 3.3346970  | 3.5275414  |
| H | -3.6093391 | 3.0351023  | 3.5521607  |
| C | -0.8163092 | 1.9313344  | 4.1499980  |
| H | -1.8020076 | 1.5726065  | 4.5140290  |
| H | -0.1217336 | 1.9392422  | 5.0148300  |
| H | -0.4268308 | 1.1865766  | 3.4292416  |
| C | -1.3178537 | 4.3916993  | 4.5746345  |
| H | 0.0897820  | 3.6055386  | 3.1654668  |
| H | -2.3053066 | 4.1715711  | 5.0316579  |
| H | -1.3735382 | 5.4050460  | 4.1271758  |
| H | -0.5740072 | 4.4188100  | 5.3972526  |
| C | -5.6686844 | 3.0288701  | 1.6588295  |
| C | -6.0868453 | 1.6186332  | 1.1940358  |
| H | -7.1870497 | 1.4869334  | 1.2609158  |
| H | -5.6089053 | 0.8445141  | 1.8296335  |
| H | -5.7840491 | 1.4282608  | 0.1446455  |
| C | -6.1618095 | 3.2965181  | 3.0858644  |
| H | -6.1728610 | 3.7598347  | 0.9863913  |
| H | -7.2684778 | 3.2447172  | 3.1308023  |
| H | -5.8503916 | 4.2969629  | 3.4476417  |
| H | -5.7719225 | 2.5413528  | 3.8001150  |
| C | -1.7929651 | 3.7484724  | -1.5275299 |
| C | -2.6579323 | 3.0113801  | -2.5671065 |
| H | -2.0878383 | 2.8064056  | -3.4953960 |
| H | -3.5607903 | 3.5862119  | -2.8611198 |
| H | -3.0723207 | 2.0608690  | -2.1532026 |
| C | -1.6701354 | 5.2347363  | -1.9135276 |
| H | -0.7801051 | 3.3006254  | -1.5733358 |
| H | -1.3032353 | 5.3447420  | -2.9551841 |
| H | -0.9614520 | 5.7650424  | -1.2492511 |
| H | -2.6537208 | 5.7438746  | -1.8382224 |
| H | 1.5996224  | -5.7853581 | -3.6307021 |
| H | 5.0216420  | -1.3964893 | -4.6827499 |
| H | 4.4107082  | -4.8485857 | 1.9574678  |
| C | 1.3434464  | -4.7463270 | -3.9391151 |
| H | 3.3531665  | 1.3478722  | -4.3580403 |
| H | -0.7670286 | -5.2594268 | -4.3237909 |
| H | 1.8645264  | -4.6853099 | 2.3396807  |
| C | 2.1188325  | -3.8107145 | -3.0181842 |
| C | 5.1792275  | -0.7179823 | -3.8181384 |
| C | -0.1704351 | -4.5570878 | -3.7043440 |
| H | -0.4833579 | -3.5225773 | -3.9606855 |
| C | 2.6440002  | -2.5826015 | -3.4481046 |
| C | 4.2563837  | -4.5724459 | 0.8936716  |
| H | 2.7795020  | -4.6956743 | -5.6052844 |
| C | 2.2628833  | -4.1397570 | -1.6594756 |
| C | 1.6893927  | -4.6018004 | -5.4261360 |
| H | 1.1747791  | -5.3823031 | -6.0224154 |
| H | 1.8925127  | -5.1186291 | -1.3153139 |
| C | 2.8972476  | 0.3817705  | -4.0582802 |
| H | 5.6674292  | 0.2048498  | -4.1953623 |
| H | 5.8814950  | -1.2207167 | -3.1227425 |
| C | 3.2264090  | -1.6659650 | -2.5538923 |
| C | 1.7581722  | -4.5031151 | 1.2518070  |
| C | 2.8324561  | -3.2635810 | -0.7189918 |
| H | 5.1611791  | -4.0365211 | 0.5424049  |
| H | 4.1870811  | -5.5108237 | 0.3035673  |
| C | 3.8440341  | -0.3879821 | -3.1218609 |
| C | 3.2812189  | -1.9835583 | -1.1667218 |
| C | 2.9760281  | -3.7291630 | 0.7287483  |
| H | 1.9313121  | 0.5962131  | -3.5614528 |
| H | 0.8311762  | -3.9199123 | 1.1090901  |
| H | 2.6901735  | -0.1828552 | -4.9913745 |
| H | -0.4348401 | -4.7321110 | -2.6421883 |
| H | 1.6355902  | -5.4897335 | 0.7568331  |
| H | 1.3623677  | -3.6199093 | -5.8274157 |
| H | 4.0859844  | 0.2831604  | -2.2733583 |

|    |            |            |            |   |           |           |           |
|----|------------|------------|------------|---|-----------|-----------|-----------|
| H  | 3.0638987  | -2.8279975 | 1.3690163  | O | -0.202474 | 1.151457  | 1.102343  |
| H  | 2.5917170  | -2.3147265 | -4.5133534 | O | 1.463366  | 0.369256  | -0.713029 |
| Zn | -2.1108979 | 0.1734083  | -2.3149457 | P | -0.125898 | 0.308306  | -0.300418 |
| Br | -2.8548647 | -1.0524720 | -4.0925788 | O | -0.775895 | 1.090660  | -1.465418 |
| H  | -5.3622941 | -3.2148645 | -0.1915850 | O | -0.613322 | -1.102476 | 0.013581  |
| Br | 1.1615689  | -1.4402849 | 3.2366845  | C | 3.827912  | 6.169681  | 1.291388  |
| Zn | -0.7525381 | -1.4714759 | 1.8815880  | C | 4.591224  | 4.984288  | 1.121842  |
| C  | -4.6564286 | -2.0858805 | 1.5609766  | H | 1.845301  | 7.002723  | 1.542803  |
| C  | -5.3991102 | -2.2038336 | 0.2742298  | H | 4.329234  | 7.149519  | 1.299064  |
| C  | -3.6529313 | -1.1516711 | 1.4450814  | H | 4.573760  | 2.831148  | 0.979025  |
| C  | -2.5987491 | -0.6727847 | 2.3211410  | H | 5.682196  | 5.050531  | 0.991362  |
| C  | -3.7318844 | -0.6991933 | 0.0431490  | C | 4.648476  | 1.211299  | 4.466817  |
| O  | -4.7304528 | -1.2923744 | -0.6267712 | C | 5.437936  | 0.036854  | 4.347250  |
| O  | -2.9782409 | 0.1222580  | -0.5125408 | H | 3.124771  | 2.461304  | 3.592650  |
| H  | -6.4664341 | -1.8922820 | 0.3321509  | H | 4.752258  | 1.849278  | 5.357652  |
| C  | -4.1061303 | -6.5042640 | -0.1706807 | H | 6.158823  | -0.224544 | 5.136821  |
| C  | -3.1987931 | -5.5526581 | 0.3018659  | H | 5.866111  | -1.716175 | 3.149657  |
| C  | -2.8246444 | -4.4686510 | -0.5272526 | C | -2.646283 | 3.786818  | 0.478651  |
| C  | -3.3685342 | -4.3447606 | -1.8270490 | C | -1.796162 | 3.426329  | 1.552362  |
| C  | -4.2820571 | -5.3010670 | -2.2920584 | C | -4.039421 | 3.681828  | 0.644473  |
| C  | -4.6472217 | -6.3788483 | -1.4672283 | C | -2.355649 | 2.950582  | 2.769729  |
| H  | -4.3983360 | -7.3531267 | 0.4660909  | C | -3.752404 | 2.854921  | 2.882276  |
| H  | -2.7599350 | -5.6187896 | 1.3089881  | C | -4.615537 | 3.210458  | 1.831361  |
| C  | -1.9010696 | -3.4365951 | -0.0499254 | H | -4.707297 | 3.954315  | -0.188766 |
| H  | -3.0836163 | -3.4893554 | -2.4625946 | C | -1.474188 | 2.602841  | 3.965892  |
| H  | -4.7085456 | -5.2053822 | -3.3018242 | H | -4.181186 | 2.477352  | 3.823555  |
| H  | -5.3611773 | -7.1320021 | -1.8352719 | C | -1.871170 | 1.285126  | 4.646651  |
| O  | -1.4414208 | -3.3943822 | 1.1010615  | H | -2.865214 | 1.348905  | 5.136648  |
| H  | -2.4125068 | 0.4090726  | 2.1649511  | H | -1.131126 | 1.014860  | 5.426271  |
| H  | -2.7907470 | -0.8825721 | 3.3898484  | H | -1.894837 | 0.456008  | 3.912686  |
| H  | -4.9042025 | -2.6730594 | 2.4549252  | C | -1.453568 | 3.783507  | 4.956232  |
| H  | -1.6147463 | -2.6439651 | -0.7875884 | H | -0.437005 | 2.467561  | 3.597195  |
|    |            |            |            | H | -2.470486 | 3.980963  | 5.356427  |
|    |            |            |            | H | -1.104141 | 4.713619  | 4.462724  |
|    |            |            |            | H | -0.781699 | 3.575382  | 5.814487  |
|    |            |            |            | C | -6.127016 | 3.080596  | 1.961610  |
|    |            |            |            | C | -6.559850 | 1.618737  | 2.174304  |
|    |            |            |            | H | -7.664669 | 1.542587  | 2.252606  |
|    |            |            |            | H | -6.129001 | 1.203015  | 3.109105  |
|    |            |            |            | H | -6.224265 | 0.978816  | 1.334629  |
|    |            |            |            | C | -6.676696 | 4.006871  | 3.059934  |
|    |            |            |            | H | -6.561129 | 3.416219  | 0.993502  |
|    |            |            |            | H | -7.784720 | 3.961911  | 3.102050  |
|    |            |            |            | H | -6.379865 | 5.059694  | 2.878839  |
|    |            |            |            | H | -6.290402 | 3.717849  | 4.059568  |
|    |            |            |            | C | -2.091281 | 4.232268  | -0.868918 |
|    |            |            |            | C | -2.815490 | 3.521632  | -2.022998 |
|    |            |            |            | H | -2.209424 | 3.498567  | -2.950240 |
|    |            |            |            | H | -3.788392 | 3.982612  | -2.288730 |
|    |            |            |            | H | -3.089948 | 2.488499  | -1.687697 |
|    |            |            |            | C | -2.160269 | 5.759333  | -1.051712 |
|    |            |            |            | H | -1.026061 | 3.925911  | -0.907831 |
|    |            |            |            | H | -1.740517 | 6.067727  | -2.031716 |
|    |            |            |            | H | -1.595249 | 6.284802  | -0.256986 |
|    |            |            |            | H | -3.212059 | 6.111725  | -1.003236 |
|    |            |            |            | H | 2.416998  | -5.879283 | -3.835094 |
|    |            |            |            | H | 5.480592  | -0.846736 | -4.132901 |
|    |            |            |            | H | 2.246539  | -4.941179 | 2.382924  |
|    |            |            |            | C | 3.160146  | -5.101868 | -4.127675 |
|    |            |            |            | H | 3.337514  | 1.433940  | -3.832302 |
|    |            |            |            | H | 2.717922  | -5.446055 | -6.243821 |
|    |            |            |            | H | -0.040374 | -4.386376 | 1.390415  |
|    |            |            |            | C | 3.100982  | -4.021609 | -3.049926 |
|    |            |            |            | C | 5.398202  | -0.309424 | -3.165136 |
|    |            |            |            | C | 2.777168  | -4.599647 | -5.529559 |
|    |            |            |            | H | 3.529611  | -3.890134 | -5.930946 |
|    |            |            |            | C | 3.484477  | -2.693708 | -3.299838 |
|    |            |            |            | C | 2.715127  | -4.763094 | 1.393508  |
|    |            |            |            | H | 4.793420  | -6.196791 | -3.145245 |
|    |            |            |            | C | 2.631551  | -4.334016 | -1.759699 |
|    |            |            |            | C | 4.541387  | -5.782119 | -4.141450 |

### 7.2.3.8 to 15p-ma

#### TS1-8-p; woelfling data

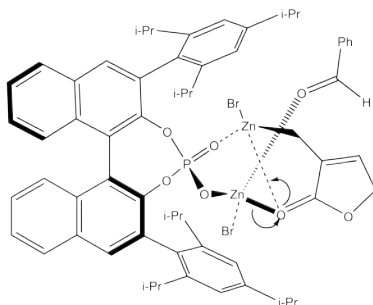

Energy(Hartree)= -11969.988327

|   |           |           |          |
|---|-----------|-----------|----------|
| C | 0.483872  | 2.353795  | 1.233151 |
| C | 1.881894  | 2.347526  | 1.255101 |
| C | 2.559695  | 3.621431  | 1.270926 |
| C | 3.973748  | 3.741354  | 1.117628 |
| C | 1.781864  | 4.829252  | 1.410610 |
| C | 2.450384  | 6.089550  | 1.427748 |
| C | 0.363975  | 4.741910  | 1.522361 |
| H | -0.215983 | 5.663047  | 1.688501 |
| C | -0.307746 | 3.530044  | 1.417468 |
| C | 3.178731  | -1.092907 | 0.142866 |
| C | 4.143515  | -1.338359 | 1.113269 |
| H | 4.761025  | -2.245979 | 1.030990 |
| C | 4.341747  | -0.469652 | 2.220062 |
| C | 5.280332  | -0.788383 | 3.245501 |
| C | 3.569372  | 0.744242  | 2.317887 |
| C | 3.739157  | 1.557883  | 3.477361 |
| C | 2.633792  | 1.060103  | 1.266993 |
| C | 2.421731  | 0.109338  | 0.265072 |

|    |           |           |           |
|----|-----------|-----------|-----------|
| H  | 4.571038  | -6.609525 | -4.880703 |
| H  | 2.274221  | -5.358381 | -1.559582 |
| C  | 2.992904  | 0.400229  | -3.622302 |
| H  | 5.761870  | 0.725667  | -3.329326 |
| H  | 6.082015  | -0.805027 | -2.446699 |
| C  | 3.467959  | -1.706121 | -2.295344 |
| C  | 0.442512  | -4.241578 | 0.399966  |
| C  | 2.540716  | -3.373204 | -0.736976 |
| H  | 3.746887  | -4.398869 | 1.569705  |
| H  | 2.786594  | -5.738309 | 0.866264  |
| C  | 3.951570  | -0.299109 | -2.640135 |
| C  | 3.020153  | -2.056407 | -0.992628 |
| C  | 1.888409  | -3.745662 | 0.592062  |
| H  | 1.970872  | 0.463296  | -3.200884 |
| H  | -0.160409 | -3.511843 | -0.175938 |
| H  | 2.939653  | -0.138833 | -4.591554 |
| H  | 1.796955  | -4.081375 | -5.532878 |
| H  | 0.394126  | -5.215405 | -0.132157 |
| H  | 5.331441  | -5.051234 | -4.411635 |
| H  | 3.954127  | 0.295774  | -1.704850 |
| H  | 1.821267  | -2.823234 | 1.203353  |
| H  | 3.823736  | -2.411179 | -4.308005 |
| Zn | -2.235826 | 0.864971  | -2.642733 |
| Br | -2.991158 | 1.138406  | -4.793756 |
| C  | -0.782109 | -5.179465 | -4.047260 |
| C  | -3.301907 | -1.989390 | -2.826227 |
| C  | -0.224862 | -4.033574 | -3.449849 |
| C  | -3.003093 | -4.236208 | -3.839613 |
| C  | -2.444631 | -3.089565 | -3.226075 |
| C  | -2.171416 | -5.287895 | -4.237320 |
| C  | -1.048103 | -2.995372 | -3.021375 |
| O  | -2.895269 | -0.995957 | -2.205234 |
| H  | -0.117822 | -5.997396 | -4.367947 |
| H  | -4.092146 | -4.291655 | -3.994382 |
| H  | 0.856496  | -3.951600 | -3.295979 |
| H  | -2.597497 | -6.189957 | -4.700172 |
| H  | -0.631342 | -2.108944 | -2.521278 |
| Br | 0.709378  | -1.445949 | 3.363155  |
| Zn | -1.108839 | -1.739252 | 1.904959  |
| H  | -5.597115 | -2.183754 | -1.438068 |
| H  | -2.916865 | -3.608668 | 2.422309  |
| C  | -4.877084 | -2.837117 | 0.534816  |
| C  | -5.635780 | -1.905850 | -0.359383 |
| H  | -5.118986 | -3.903914 | 0.641772  |
| C  | -3.916900 | -2.144098 | 1.205066  |
| C  | -2.928526 | -2.518262 | 2.227025  |
| C  | -3.969328 | -0.741222 | 0.690746  |
| O  | -5.018569 | -0.624850 | -0.198910 |
| O  | -3.228491 | 0.191533  | 0.937561  |
| H  | -6.714127 | -1.826575 | -0.091276 |
| H  | -3.179308 | -2.008282 | 3.185537  |
| H  | -4.382881 | -2.055032 | -3.114977 |

|   |           |           |           |
|---|-----------|-----------|-----------|
| C | 1.567531  | 4.672403  | 1.835212  |
| C | 2.215480  | 5.939677  | 1.935504  |
| C | 0.144852  | 4.562942  | 1.849127  |
| H | -0.456284 | 5.473068  | 1.998050  |
| C | -0.499759 | 3.343365  | 1.680962  |
| C | 3.062345  | -1.259936 | 0.616236  |
| C | 3.933824  | -1.515375 | 1.671695  |
| H | 4.538722  | -2.434985 | 1.647862  |
| C | 4.057658  | -0.642411 | 2.788459  |
| C | 4.900659  | -0.964119 | 3.894214  |
| C | 3.298837  | 0.583230  | 2.814152  |
| C | 3.376461  | 1.403490  | 3.980283  |
| C | 2.465960  | 0.909775  | 1.684332  |
| C | 2.323213  | -0.037943 | 0.662328  |
| O | -0.305533 | 0.958777  | 1.367762  |
| O | 1.461999  | 0.243926  | -0.395146 |
| P | -0.165449 | 0.317404  | -0.126701 |
| O | -0.663159 | 1.333800  | -1.172974 |
| O | -0.782257 | -1.070136 | -0.122867 |
| C | 3.598071  | 6.041642  | 1.892768  |
| C | 4.391068  | 4.873518  | 1.740303  |
| H | 1.591939  | 6.841821  | 2.037735  |
| H | 4.082543  | 7.027145  | 1.966160  |
| H | 4.413661  | 2.723180  | 1.535347  |
| H | 5.486860  | 4.959709  | 1.682219  |
| C | 4.191872  | 1.053008  | 5.046446  |
| C | 4.974452  | -0.131334 | 4.999933  |
| H | 2.766321  | 2.315437  | 4.036263  |
| H | 4.226176  | 1.696751  | 5.938655  |
| H | 5.622785  | -0.393818 | 5.849656  |
| H | 5.482643  | -1.898345 | 3.857032  |
| C | -2.789836 | 3.485924  | 0.581272  |
| C | -1.987367 | 3.167026  | 1.709532  |
| C | -4.169712 | 3.224030  | 0.638642  |
| C | -2.582735 | 2.596410  | 2.867912  |
| C | -3.967075 | 2.348206  | 2.868862  |
| C | -4.778620 | 2.639831  | 1.761130  |
| H | -4.801395 | 3.443991  | -0.236570 |
| C | -1.759738 | 2.268843  | 4.112770  |
| H | -4.416492 | 1.883506  | 3.759659  |
| C | -1.955900 | 0.824387  | 4.592553  |
| H | -2.991050 | 0.636225  | 4.946067  |
| H | -1.275021 | 0.601378  | 5.439781  |
| H | -1.743579 | 0.093385  | 3.789368  |
| C | -2.038747 | 3.288520  | 5.232059  |
| H | -0.688468 | 2.375284  | 3.846282  |
| H | -3.099088 | 3.242998  | 5.557898  |
| H | -1.832856 | 4.325888  | 4.897570  |
| H | -1.403832 | 3.077936  | 6.117756  |
| C | -6.275544 | 2.354068  | 1.750255  |
| C | -6.637342 | 0.978274  | 2.331772  |
| H | -7.717855 | 0.769001  | 2.189464  |
| H | -6.438008 | 0.926603  | 3.422316  |
| H | -6.052396 | 0.171663  | 1.848916  |
| C | -7.049692 | 3.481461  | 2.459458  |
| H | -6.582880 | 2.350608  | 0.680720  |
| H | -8.146023 | 3.319955  | 2.391598  |
| H | -6.817737 | 4.471310  | 2.017071  |
| H | -6.778641 | 3.524829  | 3.535291  |
| C | -2.184223 | 4.081667  | -0.687673 |
| C | -2.815237 | 3.504357  | -1.968198 |
| H | -2.189424 | 3.738109  | -2.860954 |
| H | -3.811725 | 3.936927  | -2.196276 |
| H | -3.010772 | 2.412703  | -1.859615 |
| C | -2.274156 | 5.618426  | -0.700839 |
| H | -1.111033 | 3.801878  | -0.697654 |
| H | -1.817656 | 6.038395  | -1.621448 |
| H | -1.750021 | 6.058568  | 0.169200  |
| H | -3.332296 | 5.951193  | -0.656779 |
| H | 2.728326  | -6.268084 | -3.150852 |
| H | 6.131743  | -1.403306 | -3.253672 |

### TS2-8-p; woelfling data

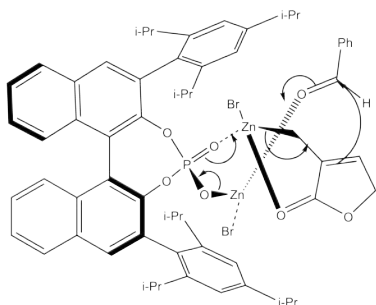

Energy(Hartree) = -11969.98993

|   |          |          |          |
|---|----------|----------|----------|
| C | 0.330158 | 2.188009 | 1.549323 |
| C | 1.721311 | 2.201439 | 1.637919 |
| C | 2.376536 | 3.482022 | 1.717969 |
| C | 3.794567 | 3.623245 | 1.658274 |

|    |           |           |           |
|----|-----------|-----------|-----------|
| H  | 1.250467  | -4.670770 | 2.756832  |
| C  | 3.543287  | -5.536368 | -3.347748 |
| H  | 4.247706  | 1.080121  | -3.168262 |
| H  | 3.776703  | -6.156181 | -5.431739 |
| H  | -0.737874 | -4.291318 | 1.199776  |
| C  | 3.274797  | -4.332834 | -2.443507 |
| C  | 5.989590  | -0.887315 | -2.281264 |
| C  | 3.539369  | -5.239706 | -4.854793 |
| H  | 4.290476  | -4.472024 | -5.132960 |
| C  | 3.919437  | -3.093348 | -2.616061 |
| C  | 1.947283  | -4.569275 | 1.899945  |
| H  | 4.881409  | -6.491523 | -1.879160 |
| C  | 2.427318  | -4.470458 | -1.330355 |
| C  | 4.872495  | -6.209449 | -2.950363 |
| H  | 5.044019  | -7.125673 | -3.553262 |
| H  | 1.882514  | -5.418974 | -1.197938 |
| C  | 3.754084  | 0.100307  | -3.002795 |
| H  | 6.484872  | 0.101809  | -2.362358 |
| H  | 6.521416  | -1.475865 | -1.506484 |
| C  | 3.796728  | -2.047381 | -1.676859 |
| C  | -0.027422 | -4.274734 | 0.348807  |
| C  | 2.262994  | -3.455979 | -0.366579 |
| H  | 2.895491  | -4.140615 | 2.280552  |
| H  | 2.167491  | -5.585823 | 1.510080  |
| C  | 4.502518  | -0.716704 | -1.930673 |
| C  | 2.997760  | -2.248110 | -0.516447 |
| C  | 1.315658  | -3.685870 | 0.808311  |
| H  | 2.706848  | 0.299837  | -2.701236 |
| H  | -0.467184 | -3.668356 | -0.468355 |
| H  | 3.736082  | -0.436086 | -3.975122 |
| H  | 2.549555  | -4.891710 | -5.204544 |
| H  | 0.071466  | -5.317194 | -0.018034 |
| H  | 5.726281  | -5.522145 | -3.126097 |
| H  | 4.458585  | -0.135572 | -0.986374 |
| H  | 1.096451  | -2.698122 | 1.265418  |
| H  | 4.564004  | -2.937291 | -3.495255 |
| Zn | -1.266973 | 1.557085  | -2.963743 |
| Br | -0.219612 | 2.274216  | -4.866752 |
| C  | 0.578860  | -2.984342 | -4.727075 |
| C  | -2.900305 | -0.715285 | -3.983577 |
| C  | 0.571204  | -2.098065 | -3.635932 |
| C  | -1.778250 | -2.588366 | -5.131269 |
| C  | -1.766346 | -1.609611 | -4.109309 |
| C  | -0.596468 | -3.264984 | -5.446624 |
| C  | -0.602208 | -1.414829 | -3.329851 |
| O  | -2.890508 | 0.394922  | -3.403052 |
| H  | 1.521479  | -3.471952 | -5.004932 |
| H  | -2.705205 | -2.776428 | -5.696111 |
| H  | 1.480182  | -1.943819 | -3.036658 |
| H  | -0.580106 | -3.999250 | -6.265551 |
| H  | -0.647280 | -0.764910 | -2.448855 |
| Br | -1.933315 | -2.555139 | 3.073166  |
| Zn | -2.293180 | -2.063820 | 0.807256  |
| H  | -5.370929 | 0.170174  | -3.271589 |
| H  | -3.230931 | -3.818869 | -1.135508 |
| C  | -5.006324 | -1.822169 | -2.351318 |
| C  | -5.656286 | -0.468813 | -2.407122 |
| H  | -5.167094 | -2.607075 | -3.103767 |
| C  | -4.326775 | -1.949902 | -1.172858 |
| C  | -3.571391 | -2.995027 | -0.481618 |
| C  | -4.410831 | -0.612914 | -0.512240 |
| O  | -5.215804 | 0.219101  | -1.220497 |
| O  | -3.811933 | -0.259502 | 0.498754  |
| H  | -6.767122 | -0.541650 | -2.392486 |
| H  | -4.200901 | -3.429080 | 0.329052  |
| H  | -3.823056 | -0.999456 | -4.541698 |

int1-8-p; COSMO

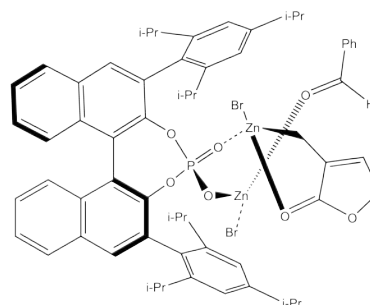

Energy(Hartree) = -11970.02044445

|   |            |            |            |
|---|------------|------------|------------|
| C | 0.2869086  | 2.1369482  | 1.1908329  |
| C | 1.6644819  | 2.0499202  | 1.4012517  |
| C | 2.3980244  | 3.2759906  | 1.5946316  |
| C | 3.8234979  | 3.3168406  | 1.6532400  |
| C | 1.6697316  | 4.5176244  | 1.7036838  |
| C | 2.3925015  | 5.7331182  | 1.8948367  |
| C | 0.2452121  | 4.5003497  | 1.6486750  |
| H | -0.3078635 | 5.4352240  | 1.8302359  |
| C | -0.4661449 | 3.3333865  | 1.3934390  |
| C | 2.9781092  | -1.4091401 | 0.3679172  |
| C | 3.7306706  | -1.7464888 | 1.4879614  |
| H | 4.3240951  | -2.6736589 | 1.4718192  |
| C | 3.7455663  | -0.9407535 | 2.6603108  |
| C | 4.4505527  | -1.3499382 | 3.8316163  |
| C | 3.0310760  | 0.3117080  | 2.6676376  |
| C | 3.0166557  | 1.0751404  | 3.8734553  |
| C | 2.3254996  | 0.7171843  | 1.4777157  |
| C | 2.2444706  | -0.1876081 | 0.4165342  |
| O | -0.4213799 | 0.9880369  | 0.8691170  |
| O | 1.4739233  | 0.1428790  | -0.6956288 |
| P | -0.1622382 | 0.2447947  | -0.5675550 |
| O | -0.5023643 | 1.1772811  | -1.7557881 |
| O | -0.8752714 | -1.1005144 | -0.4947366 |
| C | 3.7784761  | 5.7370871  | 1.9576059  |
| C | 4.4971898  | 4.5184364  | 1.8263723  |
| H | 1.8253809  | 6.6729327  | 1.9860509  |
| H | 4.3234078  | 6.6826557  | 2.1009900  |
| H | 4.3887639  | 2.3799839  | 1.5461827  |
| H | 5.5974730  | 4.5268351  | 1.8582054  |
| C | 3.6975923  | 0.6410352  | 5.0023946  |
| C | 4.4324143  | -0.5747804 | 4.9813248  |
| H | 2.4399826  | 2.0098544  | 3.9103387  |
| H | 3.6600519  | 1.2408545  | 5.9246541  |
| H | 4.9723488  | -0.9056804 | 5.8816450  |
| H | 4.9983762  | -2.3051864 | 3.8080958  |
| C | -2.7940589 | 3.6280011  | 0.4018565  |
| C | -1.9617882 | 3.3002007  | 1.4991952  |
| C | -4.1860539 | 3.6921138  | 0.5956353  |
| C | -2.5390259 | 2.9668962  | 2.7545702  |
| C | -3.9354224 | 3.0397257  | 2.8968311  |
| C | -4.7789061 | 3.4141767  | 1.8370378  |
| H | -4.8417734 | 3.9516771  | -0.2510403 |
| C | -1.6874164 | 2.5339656  | 3.9460366  |
| H | -4.3794675 | 2.7849124  | 3.8724404  |
| C | -2.1649234 | 1.1971912  | 4.5373071  |
| H | -3.1703929 | 1.2848340  | 5.0003953  |
| H | -1.4640611 | 0.8511623  | 5.3243608  |
| H | -2.2036663 | 0.4127087  | 3.7566234  |
| C | -1.6165087 | 3.6445864  | 5.0096882  |
| H | -0.6540543 | 2.3663839  | 3.5808547  |
| H | -2.6238041 | 3.8732075  | 5.4177717  |
| H | -1.2049863 | 4.5833094  | 4.5849998  |
| H | -0.9690989 | 3.3383595  | 5.8577237  |
| C | -6.2914024 | 3.4716030  | 2.0125431  |
| C | -6.8782751 | 2.0675751  | 2.2491723  |
| H | -7.9851767 | 2.1058356  | 2.3234702  |

|    |            |            |            |    |            |            |            |
|----|------------|------------|------------|----|------------|------------|------------|
| H  | -6.4920993 | 1.6277874  | 3.1926017  | Zn | -1.8629276 | -1.8682459 | 1.1540117  |
| H  | -6.6019686 | 1.3831156  | 1.4232391  | H  | -5.7050484 | -0.1025576 | -2.2114611 |
| C  | -6.7087369 | 4.4497580  | 3.1245293  | H  | -3.7061238 | -3.7223604 | 0.3275378  |
| H  | -6.7118024 | 3.8519358  | 1.0551802  | C  | -5.5295596 | -1.7330834 | -0.7545396 |
| H  | -7.8140728 | 4.5226978  | 3.1927920  | C  | -5.8802043 | -0.3264362 | -1.1352465 |
| H  | -6.3066713 | 5.4665274  | 2.9398567  | H  | -6.0526726 | -2.6110956 | -1.1597927 |
| H  | -6.3364567 | 4.1162645  | 4.1157891  | C  | -4.5015468 | -1.7205164 | 0.1389548  |
| C  | -2.2040586 | 3.8915698  | -0.9786414 | C  | -3.6690266 | -2.7315546 | 0.8204885  |
| C  | -2.9821921 | 3.1499632  | -2.0789828 | C  | -4.1588184 | -0.2863683 | 0.3500445  |
| H  | -2.4507237 | 3.2344565  | -3.0565207 | O  | -4.9943970 | 0.5124666  | -0.3693246 |
| H  | -3.9887494 | 3.5730957  | -2.2732804 | O  | -3.2319573 | 0.1544635  | 1.0202038  |
| H  | -3.1843789 | 2.0944918  | -1.7684933 | H  | -6.9313184 | -0.0506676 | -0.8954582 |
| C  | -2.1099000 | 5.3942441  | -1.2939142 | H  | -4.0178570 | -2.8658033 | 1.8701269  |
| H  | -1.1747001 | 3.4794813  | -0.9813154 | H  | -3.8121352 | -2.3149246 | -2.6313075 |
| H  | -1.6590486 | 5.5665355  | -2.2935399 |    |            |            |            |
| H  | -1.4829476 | 5.9137302  | -0.5422560 |    |            |            |            |
| H  | -3.1139700 | 5.8675693  | -1.2817759 |    |            |            |            |
| H  | 3.0504875  | -5.9273902 | -4.0046537 |    |            |            |            |
| H  | 6.2471896  | -1.0186691 | -3.2403260 |    |            |            |            |
| H  | 1.2805380  | -5.2440509 | 2.0241742  |    |            |            |            |
| C  | 3.8877742  | -5.1929370 | -3.9874843 |    |            |            |            |
| H  | 4.1527055  | 1.3277753  | -3.2457862 |    |            |            |            |
| H  | 4.2080041  | -5.4659264 | -6.1341815 |    |            |            |            |
| H  | -0.6713334 | -4.4852630 | 0.5410930  |    |            |            |            |
| C  | 3.5258308  | -4.1369639 | -2.9482055 |    |            |            |            |
| C  | 5.9677978  | -0.5459726 | -2.2755405 |    |            |            |            |
| C  | 4.0583900  | -4.6393819 | -5.4102557 |    |            |            |            |
| H  | 4.9450018  | -3.9765643 | -5.4874374 |    |            |            |            |
| C  | 4.0618672  | -2.8378425 | -2.9860540 |    |            |            |            |
| C  | 1.9861672  | -5.0444754 | 1.1917024  |    |            |            |            |
| H  | 5.0152461  | -6.4064032 | -2.5372853 |    |            |            |            |
| C  | 2.6736208  | -4.4614641 | -1.8770773 |    |            |            |            |
| C  | 5.1503003  | -5.9588279 | -3.5422948 |    |            |            |            |
| H  | 5.3962285  | -6.7732959 | -4.2551819 |    |            |            |            |
| H  | 2.2050382  | -5.4597109 | -1.8557659 |    |            |            |            |
| C  | 3.7423059  | 0.2982500  | -3.1877482 |    |            |            |            |
| H  | 6.3852791  | 0.4819563  | -2.2793923 |    |            |            |            |
| H  | 6.4649054  | -1.1156505 | -1.4642888 |    |            |            |            |
| C  | 3.8319107  | -1.9019011 | -1.9586490 |    |            |            |            |
| C  | 0.0495633  | -4.3343960 | -0.2906423 |    |            |            |            |
| C  | 2.4006481  | -3.5584672 | -0.8328505 |    |            |            |            |
| H  | 2.9564028  | -4.7451333 | 1.6371960  |    |            |            |            |
| H  | 2.1468897  | -5.9950154 | 0.6395094  |    |            |            |            |
| C  | 4.4428164  | -0.5071713 | -2.0758959 |    |            |            |            |
| C  | 3.0327237  | -2.2854993 | -0.8471109 |    |            |            |            |
| C  | 1.4262401  | -3.9449811 | 0.2744603  |    |            |            |            |
| H  | 2.6542760  | 0.3758942  | -2.9931284 |    |            |            |            |
| H  | -0.3477314 | -3.5360542 | -0.9473411 |    |            |            |            |
| H  | 3.8869097  | -0.1784415 | -4.1804655 |    |            |            |            |
| H  | 3.1758470  | -4.0527375 | -5.7389583 |    |            |            |            |
| H  | 0.0845665  | -5.2773089 | -0.8764245 |    |            |            |            |
| H  | 6.0221573  | -5.2733632 | -3.4902276 |    |            |            |            |
| H  | 4.2578587  | 0.0236921  | -1.1200907 |    |            |            |            |
| H  | 1.2618110  | -3.0478100 | 0.9048318  |    |            |            |            |
| H  | 4.7019672  | -2.5425922 | -3.8315513 |    |            |            |            |
| Zn | -1.8063132 | 1.1031917  | -3.1556732 |    |            |            |            |
| Br | -1.6094311 | 1.5242431  | -5.4110407 |    |            |            |            |
| C  | 0.3124958  | -4.1057429 | -4.3053897 |    |            |            |            |
| C  | -2.9082391 | -1.7146904 | -2.8944204 |    |            |            |            |
| C  | 0.5313974  | -2.7261980 | -4.1185128 |    |            |            |            |
| C  | -1.9737805 | -3.8731669 | -3.5459521 |    |            |            |            |
| C  | -1.7737979 | -2.4797835 | -3.3760612 |    |            |            |            |
| C  | -0.9365804 | -4.6815520 | -4.0192529 |    |            |            |            |
| C  | -0.5052363 | -1.9142072 | -3.6633624 |    |            |            |            |
| O  | -3.0023884 | -0.4786375 | -2.7421471 |    |            |            |            |
| H  | 1.1334918  | -4.7398397 | -4.6691456 |    |            |            |            |
| H  | -2.9555533 | -4.3105077 | -3.3046084 |    |            |            |            |
| H  | 1.5257837  | -2.2958824 | -4.3070723 |    |            |            |            |
| H  | -1.0936602 | -5.7613702 | -4.1565230 |    |            |            |            |
| H  | -0.3156381 | -0.8430840 | -3.5099343 |    |            |            |            |
| Br | -0.3216620 | -1.9189349 | 2.9429366  |    |            |            |            |

### int1-8-p

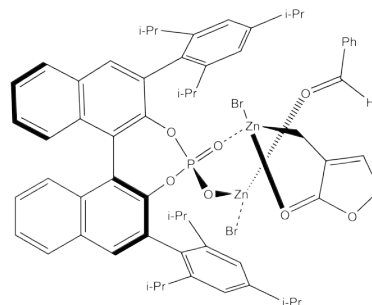

Energy(Hartree) = -11970.00733548

|   |            |            |            |
|---|------------|------------|------------|
| C | 0.2746536  | 2.1329841  | 1.1993551  |
| C | 1.6558903  | 2.0611761  | 1.3856320  |
| C | 2.3782968  | 3.2955347  | 1.5646399  |
| C | 3.8035007  | 3.3528279  | 1.6021347  |
| C | 1.6372817  | 4.5287000  | 1.6815192  |
| C | 2.3491043  | 5.7522563  | 1.8578713  |
| C | 0.2125252  | 4.4949705  | 1.6482259  |
| H | -0.3490725 | 5.4243964  | 1.8318841  |
| C | -0.4902375 | 3.3197588  | 1.4072801  |
| C | 2.9728704  | -1.3968945 | 0.3512387  |
| C | 3.7451577  | -1.7216121 | 1.4614260  |
| H | 4.3407964  | -2.6472672 | 1.4415415  |
| C | 3.7762244  | -0.9074811 | 2.6268689  |
| C | 4.5018936  | -1.3037104 | 3.7893342  |
| C | 3.0544937  | 0.3404048  | 2.6360136  |
| C | 3.0540101  | 1.1119569  | 3.8366917  |
| C | 2.3286211  | 0.7341045  | 1.4541392  |
| C | 2.2347342  | -0.1781483 | 0.3996618  |
| O | -0.4245141 | 0.9752257  | 0.8887406  |
| O | 1.4485691  | 0.1386203  | -0.7054027 |
| P | -0.1858931 | 0.2596538  | -0.5633292 |
| O | -0.5261646 | 1.2263870  | -1.7233410 |
| O | -0.9134827 | -1.0797193 | -0.5139030 |
| C | 3.7351568  | 5.7724857  | 1.8999912  |
| C | 4.4654400  | 4.5621974  | 1.7621628  |
| H | 1.7726465  | 6.6858015  | 1.9546183  |
| H | 4.2709714  | 6.7247559  | 2.0324684  |
| H | 4.3764753  | 2.4213034  | 1.4905895  |
| H | 5.5658414  | 4.5831473  | 1.7785688  |
| C | 3.7557352  | 0.6900106  | 4.9569051  |
| C | 4.4976571  | -0.5206692 | 4.9329696  |
| H | 2.4711419  | 2.0425611  | 3.8764412  |
| H | 3.7282390  | 1.2958944  | 5.8754370  |
| H | 5.0532208  | -0.8421851 | 5.8270411  |
| H | 5.0535623  | -2.2566108 | 3.7640871  |
| C | -2.8161529 | 3.6681652  | 0.4416001  |
| C | -1.9845906 | 3.2720912  | 1.5158571  |

|   |            |            |            |    |            |            |            |
|---|------------|------------|------------|----|------------|------------|------------|
| C | -4.2071433 | 3.7347459  | 0.6437169  | H  | 4.2432660  | 0.0068172  | -1.1706008 |
| C | -2.5614553 | 2.8550184  | 2.7473840  | H  | 1.2469731  | -3.0126650 | 0.9214783  |
| C | -3.9555172 | 2.9346487  | 2.8976701  | H  | 4.6857840  | -2.6159850 | -3.8271277 |
| C | -4.7976712 | 3.3895958  | 1.8680231  | Zn | -1.7747722 | 1.1951946  | -3.1659168 |
| H | -4.8627491 | 4.0491741  | -0.1846042 | Br | -1.5761950 | 1.7109868  | -5.3897354 |
| C | -1.7005107 | 2.3361476  | 3.8977305  | C  | 0.4086654  | -3.9967652 | -4.3086176 |
| H | -4.4010291 | 2.6162242  | 3.8525959  | C  | -2.8523866 | -1.6431228 | -2.9253541 |
| C | -2.3167216 | 1.1167158  | 4.6005714  | C  | 0.5968093  | -2.6083180 | -4.1620789 |
| H | -3.2280368 | 1.3806377  | 5.1774566  | C  | -1.8722107 | -3.7959249 | -3.5268956 |
| H | -1.5892438 | 0.6784537  | 5.3128544  | C  | -1.7041226 | -2.3944636 | -3.3982267 |
| H | -2.5765627 | 0.3290752  | 3.8669951  | C  | -0.8228965 | -4.5928837 | -3.9909902 |
| C | -1.3744932 | 3.4649190  | 4.8935199  | C  | -0.4532005 | -1.8079233 | -3.7170610 |
| H | -0.7393445 | 1.9896707  | 3.4661811  | O  | -2.9756706 | -0.4081267 | -2.8000268 |
| H | -2.3019581 | 3.8633953  | 5.3564888  | H  | 1.2401554  | -4.6196576 | -4.6663803 |
| H | -0.8582465 | 4.3097467  | 4.3938354  | H  | -2.8396692 | -4.2486522 | -3.2573037 |
| H | -0.7174586 | 3.0952067  | 5.7081498  | H  | 1.5787227  | -2.1611586 | -4.3740204 |
| C | -6.3089205 | 3.4504323  | 2.0529616  | H  | -0.9556355 | -5.6797292 | -4.0948398 |
| C | -6.9104981 | 2.0382616  | 2.1793465  | H  | -0.2887572 | -0.7275870 | -3.6023981 |
| H | -8.0165574 | 2.0809870  | 2.2631074  | Br | -0.3532115 | -1.8837421 | 2.9417484  |
| H | -6.5238054 | 1.5195562  | 3.0814499  | Zn | -1.8830085 | -1.8433383 | 1.1600445  |
| H | -6.6449728 | 1.4190094  | 1.3001107  | H  | -5.6596000 | -0.0937281 | -2.3045143 |
| C | -6.7135866 | 4.3421328  | 3.2393377  | H  | -3.7512400 | -3.6931686 | 0.3627549  |
| H | -6.7275043 | 3.9098163  | 1.1298647  | C  | -5.5162856 | -1.7114922 | -0.8245830 |
| H | -7.8177633 | 4.4233269  | 3.3157136  | C  | -5.8596219 | -0.3084944 | -1.2303479 |
| H | -6.2983258 | 5.3647803  | 3.1356471  | H  | -6.0313171 | -2.5961503 | -1.2257076 |
| H | -6.3448379 | 3.9272576  | 4.2005143  | C  | -4.5131228 | -1.6871820 | 0.0970031  |
| C | -2.2324853 | 3.9790502  | -0.9324392 | C  | -3.7012638 | -2.6844121 | 0.8159320  |
| C | -2.9994982 | 3.2442685  | -2.0463934 | C  | -4.1742842 | -0.2490766 | 0.2964145  |
| H | -2.4752787 | 3.3556177  | -3.0242070 | O  | -4.9951987 | 0.5400068  | -0.4546802 |
| H | -4.0176386 | 3.6483970  | -2.2210319 | O  | -3.2632773 | 0.2006830  | 0.9779287  |
| H | -3.1725745 | 2.1777727  | -1.7582517 | H  | -6.9169871 | -0.0324889 | -1.0170555 |
| C | -2.1697678 | 5.4891580  | -1.2163129 | H  | -4.0545704 | -2.7713873 | 1.8689254  |
| H | -1.1952197 | 3.5864553  | -0.9459118 | H  | -3.7408552 | -2.2594013 | -2.6432732 |
| H | -1.7290893 | 5.6928921  | -2.2145787 |    |            |            |            |
| H | -1.5485823 | 6.0052073  | -0.4578373 |    |            |            |            |
| H | -3.1821796 | 5.9434916  | -1.1873900 |    |            |            |            |
| H | 3.0182252  | -5.9806415 | -3.9579700 |    |            |            |            |
| H | 6.2049056  | -1.0542894 | -3.3081360 |    |            |            |            |
| H | 1.2614693  | -5.1770463 | 2.0881458  |    |            |            |            |
| C | 3.8820480  | -5.2779664 | -3.9105828 |    |            |            |            |
| H | 4.0986910  | 1.2767341  | -3.3170487 |    |            |            |            |
| H | 4.2956093  | -5.6064241 | -6.0338918 |    |            |            |            |
| H | -0.6890475 | -4.4532457 | 0.5920646  |    |            |            |            |
| C | 3.5108909  | -4.1904363 | -2.9071136 |    |            |            |            |
| C | 5.9373601  | -0.5723285 | -2.3445830 |    |            |            |            |
| C | 4.1468358  | -4.7609430 | -5.3321992 |    |            |            |            |
| H | 5.0651690  | -4.1397331 | -5.3760519 |    |            |            |            |
| C | 4.0438512  | -2.8919269 | -2.9767423 |    |            |            |            |
| C | 1.9641302  | -5.0042710 | 1.2476697  |    |            |            |            |
| H | 4.8867362  | -6.5050448 | -2.3838104 |    |            |            |            |
| C | 2.6537568  | -4.4884048 | -1.8319353 |    |            |            |            |
| C | 5.0889758  | -6.0841167 | -3.3887778 |    |            |            |            |
| H | 5.3385892  | -6.9216647 | -4.0730351 |    |            |            |            |
| H | 2.1857892  | -5.4863199 | -1.7863237 |    |            |            |            |
| C | 3.6933189  | 0.2471899  | -3.2332681 |    |            |            |            |
| H | 6.3503825  | 0.4570320  | -2.3673921 |    |            |            |            |
| H | 6.4501172  | -1.1303204 | -1.5352488 |    |            |            |            |
| C | 3.8115526  | -1.9321426 | -1.9717957 |    |            |            |            |
| C | 0.0277507  | -4.3169772 | -0.2454871 |    |            |            |            |
| C | 2.3800317  | -3.5622742 | -0.8090931 |    |            |            |            |
| H | 2.9379483  | -4.7006719 | 1.6817301  |    |            |            |            |
| H | 2.1165617  | -5.9688758 | 0.7179415  |    |            |            |            |
| C | 4.4159524  | -0.5377976 | -2.1209553 |    |            |            |            |
| C | 3.0144961  | -2.2911369 | -0.8513179 |    |            |            |            |
| C | 1.4073390  | -3.9224602 | 0.3082008  |    |            |            |            |
| H | 2.6090820  | 0.3274932  | -3.0200515 |    |            |            |            |
| H | -0.3697523 | -3.5275533 | -0.9130215 |    |            |            |            |
| H | 3.8223278  | -0.2450974 | -4.2207562 |    |            |            |            |
| H | 3.3101731  | -4.1413972 | -5.7160998 |    |            |            |            |
| H | 0.0574908  | -5.2694233 | -0.8164252 |    |            |            |            |
| H | 5.9827814  | -5.4314397 | -3.3038070 |    |            |            |            |

### 7.2.3.9 to 15b-ma

#### TS1-8-b; woelfling data

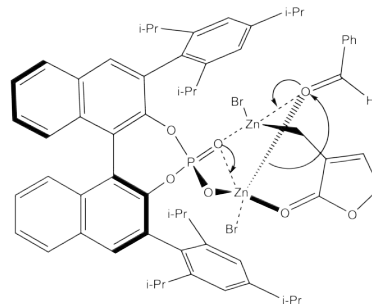

Energy(Hartree)= -11970.000359

|   |          |           |           |
|---|----------|-----------|-----------|
| C | 0.872899 | 2.521100  | 0.945172  |
| C | 2.268888 | 2.532143  | 0.865923  |
| C | 2.924444 | 3.814030  | 0.785816  |
| C | 4.322078 | 3.944950  | 0.527455  |
| C | 2.138128 | 5.016508  | 0.929855  |
| C | 2.790243 | 6.284072  | 0.864333  |
| C | 0.727554 | 4.919117  | 1.111451  |
| H | 0.146015 | 5.840967  | 1.266084  |
| C | 0.071708 | 3.694542  | 1.091774  |
| C | 3.488491 | -0.887266 | -0.387113 |
| C | 4.557821 | -1.122480 | 0.468287  |
| H | 5.177960 | -2.018118 | 0.314863  |
| C | 4.860538 | -0.257219 | 1.557586  |
| C | 5.913977 | -0.563517 | 2.469137  |
| C | 4.083016 | 0.941813  | 1.758438  |
| C | 4.363487 | 1.748447  | 2.900564  |
| C | 3.036839 | 1.254214  | 0.817614  |



|   |           |           |           |    |           |           |           |
|---|-----------|-----------|-----------|----|-----------|-----------|-----------|
| C | 2.744375  | 0.311308  | -0.169130 | C  | 3.210032  | -4.815199 | -5.697716 |
| O | 0.199097  | 1.306917  | 0.952025  | H  | 2.910030  | -5.526485 | -6.495122 |
| O | 1.671800  | 0.569266  | -1.031201 | H  | 1.811923  | -4.926495 | -2.110715 |
| P | 0.191947  | 0.336616  | -0.383037 | C  | 2.958617  | 0.830909  | -4.026740 |
| O | -0.772508 | 0.861889  | -1.471876 | H  | 5.750768  | 0.780491  | -4.109606 |
| O | -0.038864 | -1.064658 | 0.162499  | H  | 5.986748  | -0.805587 | -3.300258 |
| C | 4.154069  | 6.375082  | 0.631399  | C  | 3.318628  | -1.395402 | -2.852369 |
| C | 4.920959  | 5.193899  | 0.448781  | C  | 0.949786  | -4.241423 | 0.364315  |
| H | 2.182045  | 7.194147  | 0.986701  | C  | 2.578206  | -3.099229 | -1.230009 |
| H | 4.641566  | 7.360075  | 0.573418  | H  | 4.439798  | -4.077942 | 0.627092  |
| H | 4.923103  | 3.037611  | 0.376617  | H  | 3.457048  | -5.469575 | 0.080889  |
| H | 5.998398  | 5.267737  | 0.236204  | C  | 3.927076  | -0.038922 | -3.205232 |
| C | 5.384928  | 1.412497  | 3.778184  | C  | 3.126030  | -1.814433 | -1.505705 |
| C | 6.177955  | 0.255641  | 3.555751  | C  | 2.329043  | -3.586099 | 0.195343  |
| H | 3.748249  | 2.639298  | 3.089348  | H  | 1.994594  | 0.955974  | -3.496956 |
| H | 5.576474  | 2.044291  | 4.658829  | H  | 0.162056  | -3.595003 | -0.059646 |
| H | 6.989606  | 0.003067  | 4.254919  | H  | 2.751148  | 0.382155  | -5.020703 |
| H | 6.504845  | -1.477150 | 2.298850  | H  | -0.012771 | -3.611214 | -4.980020 |
| C | -2.298387 | 3.633512  | 0.172145  | H  | 0.886623  | -5.238011 | -0.122347 |
| C | -1.408577 | 3.539470  | 1.279164  | H  | 3.624960  | -3.913913 | -6.195720 |
| C | -3.672331 | 3.436626  | 0.395516  | H  | 4.128605  | 0.499910  | -2.257289 |
| C | -1.909661 | 3.247852  | 2.576362  | H  | 2.332333  | -2.698254 | 0.859390  |
| C | -3.294693 | 3.041289  | 2.739860  | H  | 3.110899  | -1.936321 | -4.934867 |
| C | -4.196038 | 3.137723  | 1.666377  | C  | -3.555381 | -6.774239 | 0.070702  |
| H | -4.374369 | 3.526991  | -0.448836 | C  | -2.921627 | -5.530821 | 0.094036  |
| C | -0.986372 | 3.191919  | 3.796178  | C  | -3.124683 | -4.623492 | -0.969218 |
| H | -3.677134 | 2.816384  | 3.747497  | C  | -3.960312 | -4.958084 | -2.053473 |
| C | -0.818811 | 1.768897  | 4.355910  | C  | -4.608161 | -6.201112 | -2.062875 |
| H | -1.786906 | 1.352960  | 4.704758  | C  | -4.403386 | -7.104935 | -1.005026 |
| H | -0.124211 | 1.767978  | 5.220449  | H  | -3.396813 | -7.488529 | 0.892656  |
| H | -0.398984 | 1.074723  | 3.602788  | H  | -2.266745 | -5.218250 | 0.922217  |
| C | -1.441343 | 4.169696  | 4.894876  | C  | -2.537406 | -3.278346 | -0.867885 |
| H | 0.016927  | 3.526651  | 3.462657  | H  | -4.116924 | -4.224001 | -2.861124 |
| H | -2.424502 | 3.881193  | 5.322230  | H  | -5.278960 | -6.467398 | -2.893140 |
| H | -1.534604 | 5.203953  | 4.506188  | H  | -4.911309 | -8.081046 | -1.015409 |
| H | -0.711145 | 4.179175  | 5.730116  | O  | -2.024385 | -2.863897 | 0.165947  |
| C | -5.698756 | 2.928336  | 1.832964  | Zn | -2.564702 | 0.202950  | -1.696909 |
| C | -6.075910 | 1.442261  | 1.677457  | Br | -3.662925 | -0.567143 | -3.553260 |
| H | -7.172618 | 1.299495  | 1.774425  | H  | -5.192308 | -3.605982 | 0.510765  |
| H | -5.581089 | 0.825121  | 2.457060  | Br | 1.328335  | -1.733626 | 3.334853  |
| H | -5.768002 | 1.052345  | 0.687867  | Zn | -0.626289 | -1.391907 | 2.078941  |
| C | -6.257314 | 3.510367  | 3.139890  | C  | -4.450764 | -2.490350 | 2.248143  |
| H | -6.183680 | 3.475542  | 0.993810  | C  | -5.312980 | -2.633660 | 1.039478  |
| H | -7.364670 | 3.447075  | 3.151455  | C  | -3.568607 | -1.456624 | 2.069082  |
| H | -5.972402 | 4.574367  | 3.264961  | C  | -2.451889 | -0.912820 | 2.826430  |
| H | -5.891239 | 2.955717  | 4.028768  | C  | -3.854995 | -0.938884 | 0.721946  |
| C | -1.797243 | 4.031103  | -1.216086 | O  | -4.866109 | -1.594999 | 0.134688  |
| C | -2.587710 | 3.411514  | -2.375624 | O  | -3.252722 | -0.010143 | 0.146659  |
| H | -2.073098 | 3.584520  | -3.341040 | H  | -6.399154 | -2.479102 | 1.224291  |
| H | -3.614768 | 3.819539  | -2.463528 | H  | -4.514821 | -3.158375 | 3.117361  |
| H | -2.692257 | 2.309508  | -2.279941 | H  | -2.636073 | -2.623500 | -1.780920 |
| C | -1.803431 | 5.565893  | -1.372110 | H  | -2.439032 | 0.192495  | 2.737581  |
| H | -0.748330 | 3.677764  | -1.302543 | H  | -2.456342 | -1.210057 | 3.891463  |
| H | -1.405171 | 5.865389  | -2.363448 |    |           |           |           |
| H | -1.191004 | 6.059788  | -0.594298 |    |           |           |           |
| H | -2.838517 | 5.957601  | -1.284833 |    |           |           |           |
| H | 1.638918  | -5.399329 | -4.344843 |    |           |           |           |
| H | 5.170348  | -0.722607 | -4.890977 |    |           |           |           |
| H | 3.251754  | -4.818508 | 1.744230  |    |           |           |           |
| C | 2.012528  | -4.455419 | -4.800233 |    |           |           |           |
| H | 3.391436  | 1.838081  | -4.200010 |    |           |           |           |
| H | 0.527278  | -4.544788 | -6.418205 |    |           |           |           |
| H | 0.732190  | -4.381653 | 1.443520  |    |           |           |           |
| C | 2.417802  | -3.540599 | -3.651171 |    |           |           |           |
| C | 5.283583  | -0.207127 | -3.914281 |    |           |           |           |
| C | 0.860302  | -3.847415 | -5.621405 |    |           |           |           |
| H | 1.174542  | -2.903240 | -6.113592 |    |           |           |           |
| C | 2.960701  | -2.267143 | -3.894487 |    |           |           |           |
| C | 3.433949  | -4.538364 | 0.686082  |    |           |           |           |
| H | 4.028500  | -5.278607 | -5.111025 |    |           |           |           |
| C | 2.242851  | -3.933016 | -2.314804 |    |           |           |           |

### TS2-8-b; COSMO

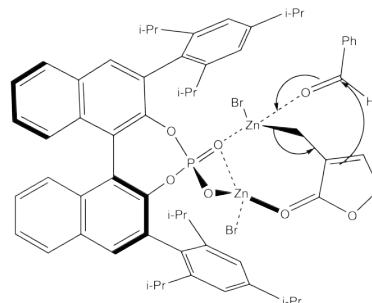

Energy(Hartree)= -11970.02353003

|   |           |           |           |
|---|-----------|-----------|-----------|
| C | 0.7607348 | 2.4824821 | 0.6883638 |
| C | 2.1574991 | 2.4729448 | 0.7077329 |
| C | 2.8304912 | 3.7514628 | 0.7305632 |

|   |            |            |            |    |            |            |            |
|---|------------|------------|------------|----|------------|------------|------------|
| C | 4.2429815  | 3.8789219  | 0.5679862  | H  | 5.8687311  | -0.5671108 | -4.7564203 |
| C | 2.0491743  | 4.9554629  | 0.8867862  | H  | 2.7134946  | -4.7629149 | 1.3380217  |
| C | 2.7134280  | 6.2181560  | 0.9251979  | C  | 2.3041919  | -3.9224076 | -5.3697719 |
| C | 0.6319632  | 4.8647758  | 1.0033721  | H  | 4.2839740  | 2.0696862  | -3.9203514 |
| H | 0.0522219  | 5.7805009  | 1.1966171  | H  | 0.7382552  | -3.7624275 | -6.9075270 |
| C | -0.0340647 | 3.6511916  | 0.8883501  | H  | 0.2825912  | -4.4186053 | 0.5723284  |
| C | 3.5272311  | -0.9096537 | -0.5010687 | C  | 2.7215293  | -3.1907764 | -4.1002612 |
| C | 4.5342276  | -1.1406769 | 0.4264094  | C  | 5.9332864  | -0.1818152 | -3.7173009 |
| H | 5.2074476  | -2.0002527 | 0.2896105  | C  | 1.1025836  | -3.2060057 | -6.0186441 |
| C | 4.7150261  | -0.2977160 | 1.5618233  | H  | 1.3879418  | -2.1849574 | -6.3495378 |
| C | 5.6875717  | -0.6061100 | 2.5591294  | C  | 3.4618620  | -1.9973472 | -4.1429413 |
| C | 3.8996504  | 0.8830460  | 1.7173102  | C  | 3.0794774  | -4.4278811 | 0.3455003  |
| C | 4.0619407  | 1.6701885  | 2.8952630  | H  | 4.3211766  | -4.6192274 | -5.9042113 |
| C | 2.9237056  | 1.1947668  | 0.7014267  | C  | 2.2946865  | -3.6543280 | -2.8442982 |
| C | 2.7193257  | 0.2478496  | -0.2994936 | C  | 3.4542264  | -4.1096872 | -6.3715277 |
| O | 0.0598100  | 1.2781641  | 0.5604756  | H  | 3.1226555  | -4.7182796 | -7.2378984 |
| O | 1.7073747  | 0.4664879  | -1.2441753 | H  | 1.7089669  | -4.5855596 | -2.8030406 |
| P | 0.1511631  | 0.3830850  | -0.8002824 | C  | 3.7404871  | 1.1021368  | -3.9004622 |
| O | -0.6446687 | 0.8776175  | -2.0291609 | H  | 6.5066696  | 0.7678551  | -3.7493965 |
| O | -0.4104972 | -1.0108584 | -0.3819681 | H  | 6.5150969  | -0.9152981 | -3.1228430 |
| C | 4.0904222  | 6.3043185  | 0.7848187  | C  | 3.7574824  | -1.2613808 | -2.9808278 |
| C | 4.8565786  | 5.1239266  | 0.5913508  | C  | 0.6907552  | -4.2069757 | -0.4351846 |
| H | 2.1058076  | 7.1272074  | 1.0570747  | C  | 2.5586478  | -2.9563503 | -1.6515149 |
| H | 4.5895176  | 7.2849648  | 0.8097051  | H  | 4.0540907  | -3.9247493 | 0.4973833  |
| H | 4.8475715  | 2.9753593  | 0.4087510  | H  | 3.2582114  | -5.3274927 | -0.2806458 |
| H | 5.9462167  | 5.1958657  | 0.4534542  | C  | 4.5373479  | 0.0465266  | -3.1105069 |
| C | 5.0036331  | 1.3308573  | 3.8569448  | C  | 3.2978356  | -1.7442006 | -1.7250227 |
| C | 5.8341081  | 0.1917129  | 3.6841045  | C  | 2.0476871  | -3.4970180 | -0.3195191 |
| H | 3.4151186  | 2.5453608  | 3.0481287  | H  | 2.7451408  | 1.2721011  | -3.4447187 |
| H | 5.1010169  | 1.9456212  | 4.7647801  | H  | -0.0459524 | -3.5853998 | -0.9824896 |
| H | 6.5811626  | -0.0642102 | 4.4508615  | H  | 3.5833982  | 0.7840524  | -4.9525052 |
| H | 6.3098406  | -1.5048194 | 2.4252302  | H  | 0.2610952  | -3.1023046 | -5.3034659 |
| C | -2.4184386 | 3.5551589  | 0.0019169  | H  | 0.7736809  | -5.1791009 | -0.9645477 |
| C | -1.5113981 | 3.5070237  | 1.0974013  | H  | 3.8098171  | -3.1377391 | -6.7729755 |
| C | -3.7854407 | 3.3593782  | 0.2561458  | H  | 4.6935791  | 0.4493756  | -2.0887278 |
| C | -1.9880415 | 3.2757247  | 2.4142143  | H  | 1.9099096  | -2.6269574 | 0.3578192  |
| C | -3.3703817 | 3.0747093  | 2.6110185  | C  | 3.8053854  | -1.6102166 | -5.1153300 |
| C | -4.2865138 | 3.1073506  | 1.5485239  | H  | -3.9354448 | -6.8326662 | 2.6307248  |
| H | -4.4961287 | 3.3952962  | -0.5839325 | C  | -3.2987763 | -5.6048556 | 2.4126824  |
| C | -1.0513381 | 3.2393862  | 3.6224111  | C  | -3.3601349 | -4.9911506 | 1.1425359  |
| H | -3.7305140 | 2.8853985  | 3.6329824  | C  | -4.0454136 | -5.6372508 | 0.0906905  |
| C | -0.9577126 | 1.8342527  | 4.2426487  | C  | -4.6806998 | -6.8695880 | 0.3127937  |
| H | -1.9504179 | 1.4754774  | 4.5877574  | H  | -4.6327481 | -7.4656646 | 1.5836847  |
| H | -0.2800417 | 1.8412019  | 5.1212645  | C  | -3.8850072 | -7.3071875 | 3.6229293  |
| H | -0.5518891 | 1.0948114  | 3.5243946  | H  | -2.7361111 | -5.1047222 | 3.2156696  |
| C | -1.4445221 | 4.2971531  | 4.6697110  | C  | -2.6829737 | -3.6878079 | 0.8936284  |
| H | -0.0344265 | 3.5018033  | 3.2668340  | H  | -4.0506681 | -5.1847150 | -0.9147453 |
| H | -2.4395356 | 4.0858019  | 5.1143623  | H  | -5.2060321 | -7.3715007 | -0.5141456 |
| H | -1.4849808 | 5.3115937  | 4.2229707  | H  | -5.1298736 | -8.4322774 | 1.7580560  |
| H | -0.7080288 | 4.3154360  | 5.4993971  | O  | -1.6723034 | -3.3624175 | 1.6297240  |
| C | -5.7807092 | 2.8493555  | 1.7311760  | Zn | -1.9127493 | -0.6603556 | -2.1135747 |
| C | -6.1559254 | 1.4478800  | 1.2071843  | Br | -2.4356878 | -2.5559289 | -3.2858848 |
| H | -7.2501857 | 1.2762575  | 1.2759038  | H  | -5.4298048 | -3.4541955 | -0.0576134 |
| H | -5.6478018 | 0.6639667  | 1.8078359  | Br | 1.1450809  | -1.3234858 | 2.8931817  |
| H | -5.8557658 | 1.3159555  | 0.1486222  | Zn | -0.7514735 | -1.6356684 | 1.5651209  |
| C | -6.2820533 | 3.0441748  | 3.1670598  | C  | -4.2318645 | -2.4030500 | 1.4874513  |
| H | -6.3072013 | 3.5898203  | 1.0872486  | C  | -5.3192944 | -2.4751643 | 0.4513651  |
| H | -7.3864818 | 2.9547456  | 3.2068096  | C  | -3.5574095 | -1.1690076 | 1.2840618  |
| H | -6.0045478 | 4.0396153  | 3.5687736  | C  | -2.5808145 | -0.5063724 | 2.0357567  |
| H | -5.8679348 | 2.2746714  | 3.8520415  | C  | -3.8997776 | -0.7866664 | -0.1061498 |
| C | -1.9263724 | 3.8633002  | -1.4107107 | O  | -4.9249020 | -1.5075737 | -0.5611540 |
| C | -2.7790194 | 3.2242137  | -2.5169529 | O  | -3.3265007 | 0.0472400  | -0.8328269 |
| H | -2.2624759 | 3.3117723  | -3.4936810 | H  | -6.3149550 | -2.1708079 | 0.8403866  |
| H | -3.7644229 | 3.7247583  | -2.6211385 | H  | -4.3883579 | -2.8365644 | 2.4852824  |
| H | -2.9589983 | 2.1511277  | -2.3174330 | H  | -2.6825693 | -3.3824740 | -0.1834282 |
| C | -1.8164171 | 5.3856318  | -1.6290125 | H  | -2.2634195 | 0.4931609  | 1.6915369  |
| H | -0.9053816 | 3.4357971  | -1.5000151 | H  | -2.5602508 | -0.6760111 | 3.1242972  |
| H | -1.4342829 | 5.6097969  | -2.6465649 |    |            |            |            |
| H | -1.1321226 | 5.8584333  | -0.8977474 |    |            |            |            |
| H | -2.8109961 | 5.8672941  | -1.5221489 |    |            |            |            |
| H | 1.9604885  | -4.9335763 | -5.0582674 |    |            |            |            |

TS2-8-b

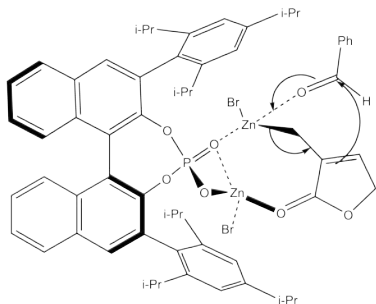

Energy(Hartree)= -11970.01085927  
 number of imaginary frequencies: 1

|   |            |            |            |
|---|------------|------------|------------|
| C | 0.7601486  | 2.4811805  | 0.6914440  |
| C | 2.1570927  | 2.4743708  | 0.7095365  |
| C | 2.8279106  | 3.7540270  | 0.7297972  |
| C | 4.2399915  | 3.8832375  | 0.5669367  |
| C | 2.0453896  | 4.9571931  | 0.8842727  |
| C | 2.7083365  | 6.2201004  | 0.9203104  |
| C | 0.6287319  | 4.8640582  | 1.0013358  |
| H | 0.0463099  | 5.7784879  | 1.1929157  |
| C | -0.0357995 | 3.6496066  | 0.8891593  |
| C | 3.5295928  | -0.9076421 | -0.4971248 |
| C | 4.5395217  | -1.1338710 | 0.4280822  |
| H | 5.2126443  | -1.9932686 | 0.2901172  |
| C | 4.7222989  | -0.2892639 | 1.5614979  |
| C | 5.6973806  | -0.5937096 | 2.5568520  |
| C | 3.9048629  | 0.8897749  | 1.7173553  |
| C | 4.0686071  | 1.6787908  | 2.8935832  |
| C | 2.9257180  | 1.1977503  | 0.7034808  |
| C | 2.7204351  | 0.2489697  | -0.2955886 |
| O | 0.0606715  | 1.2766645  | 0.5669093  |
| O | 1.7064813  | 0.4647449  | -1.2384472 |
| P | 0.1514862  | 0.3784892  | -0.7928228 |
| O | -0.6503237 | 0.8717096  | -2.0182275 |
| O | -0.4064497 | -1.0165064 | -0.3704255 |
| C | 4.0846549  | 6.3080107  | 0.7798707  |
| C | 4.8518126  | 5.1286303  | 0.5885172  |
| H | 2.0994395  | 7.1285780  | 1.0502553  |
| H | 4.5822806  | 7.2893933  | 0.8029914  |
| H | 4.8446249  | 2.9794478  | 0.4100501  |
| H | 5.9413736  | 5.2014288  | 0.4508846  |
| C | 5.0134083  | 1.3429752  | 3.8527838  |
| C | 5.8453693  | 0.2057346  | 3.6797528  |
| H | 3.4195400  | 2.5521765  | 3.0463352  |
| H | 5.1112405  | 1.9589594  | 4.7596410  |
| H | 6.5941747  | -0.0482519 | 4.4453262  |
| H | 6.3198341  | -1.4922817 | 2.4233963  |
| C | -2.4199840 | 3.5516997  | 0.0033311  |
| C | -1.5129911 | 3.5059319  | 1.0987745  |
| C | -3.7868801 | 3.3591522  | 0.2589672  |
| C | -1.9895066 | 3.2806215  | 2.4164936  |
| C | -3.3718583 | 3.0823929  | 2.6141320  |
| C | -4.2878233 | 3.1125714  | 1.5519405  |
| H | -4.4973182 | 3.3932576  | -0.5813402 |
| C | -1.0532069 | 3.2497964  | 3.6252146  |
| H | -3.7318979 | 2.8985527  | 3.6370988  |
| C | -0.9589423 | 1.8482275  | 4.2530363  |
| H | -1.9514435 | 1.4912770  | 4.6008602  |
| H | -0.2816031 | 1.8588956  | 5.1316643  |
| H | -0.5519072 | 1.1040080  | 3.5405134  |
| C | -1.4468225 | 4.3132336  | 4.6664592  |
| H | -0.0363109 | 3.5104759  | 3.2682643  |
| H | -2.4417542 | 4.1047827  | 5.1124774  |
| H | -1.4884887 | 5.3251339  | 4.2144729  |
| H | -0.7110954 | 4.3367195  | 5.4966004  |
| C | -5.7824271 | 2.8577244  | 1.7356636  |

|    |            |            |            |
|----|------------|------------|------------|
| C  | -6.1600906 | 1.4547265  | 1.2177441  |
| H  | -7.2547045 | 1.2845165  | 1.2865455  |
| H  | -5.6526036 | 0.6731300  | 1.8220939  |
| H  | -5.8590260 | 1.3166586  | 0.1603465  |
| C  | -6.2838376 | 3.0599122  | 3.1703661  |
| H  | -6.3077201 | 3.5967542  | 1.0889540  |
| H  | -7.3883788 | 2.9728718  | 3.2117871  |
| H  | -6.0040949 | 4.0562937  | 3.5676299  |
| H  | -5.8713250 | 2.2928218  | 3.8589388  |
| C  | -1.9282009 | 3.8527094  | -1.4109217 |
| C  | -2.7843658 | 3.2128722  | -2.5138850 |
| H  | -2.2676990 | 3.2928647  | -3.4909763 |
| H  | -3.7673048 | 3.7177394  | -2.6209041 |
| H  | -2.9701601 | 2.1418453  | -2.3093881 |
| C  | -1.8124523 | 5.3735111  | -1.6356344 |
| H  | -0.9094592 | 3.4203023  | -1.5005687 |
| H  | -1.4305382 | 5.5920775  | -2.6543716 |
| H  | -1.1249198 | 5.8464209  | -0.9077680 |
| H  | -2.8045013 | 5.8602173  | -1.5292978 |
| H  | 1.9506431  | -4.9533222 | -5.0286309 |
| H  | 5.8481081  | -0.5760274 | -4.7656287 |
| H  | 2.7424783  | -4.7576307 | 1.3611124  |
| C  | 2.2890781  | -3.9421917 | -5.3464224 |
| H  | 4.2596986  | 2.0609795  | -3.9328896 |
| H  | 0.7137127  | -3.7932048 | -6.8760403 |
| H  | 0.3066012  | -4.4288844 | 0.6073845  |
| C  | 2.7118720  | -3.2047360 | -4.0822143 |
| C  | 5.9164784  | -0.1858704 | -3.7286745 |
| C  | 1.0814465  | -3.2326125 | -5.9912116 |
| H  | 1.3613556  | -2.2120327 | -6.3277413 |
| C  | 3.4480641  | -2.0095905 | -4.1335885 |
| C  | 3.1014744  | -4.4251256 | 0.3654534  |
| H  | 4.3053024  | -4.6353695 | -5.8884363 |
| C  | 2.2943828  | -3.6647069 | -2.8222807 |
| C  | 3.4342105  | -4.1310620 | -6.3532673 |
| H  | 3.1004702  | -4.7438197 | -7.2158169 |
| H  | 1.7118891  | -4.5974915 | -2.7740176 |
| C  | 3.7193841  | 1.0918560  | -3.9055671 |
| H  | 6.4880601  | 0.7645905  | -3.7683522 |
| H  | 6.5028325  | -0.9160640 | -3.1349828 |
| C  | 3.7479664  | -1.2682506 | -2.9765194 |
| C  | 0.7086077  | -4.2179099 | -0.4026529 |
| H  | 2.5629520  | -2.9620406 | -1.6336706 |
| C  | 4.0747046  | -3.9177986 | 0.5107720  |
| H  | 3.2812541  | -5.3254638 | -0.2591236 |
| C  | 4.5231395  | 0.0414408  | -3.1158498 |
| C  | 3.2969431  | -1.7475216 | -1.7165437 |
| C  | 2.0624130  | -3.5006059 | -0.2968221 |
| H  | 2.7256472  | 1.2609664  | -3.4464941 |
| H  | -0.0339365 | -3.6032936 | -0.9499539 |
| H  | 3.5572362  | 0.7694054  | -4.9554177 |
| H  | 0.2432312  | -3.1279791 | -5.2726797 |
| H  | 0.7937832  | -5.1916784 | -0.9285829 |
| H  | 3.7852658  | -3.1602114 | -6.7611367 |
| H  | 4.6837722  | 0.4486438  | -2.0963732 |
| H  | 1.9243114  | -2.6297081 | 0.3796135  |
| H  | 3.7849301  | -1.6252441 | -5.1093243 |
| C  | -3.9310728 | -6.8548345 | 2.5426668  |
| C  | -3.2892610 | -5.6256924 | 2.3516176  |
| C  | -3.3473493 | -4.9848812 | 1.0952795  |
| C  | -4.0314079 | -5.6068524 | 0.0284866  |
| C  | -4.6715279 | -6.8409004 | 0.2239030  |
| C  | -4.6290187 | -7.4628225 | 1.4819765  |
| H  | -3.8829464 | -7.3512549 | 3.5241957  |
| H  | -2.7209743 | -5.1444097 | 3.1621005  |
| C  | -2.6683535 | -3.6770897 | 0.8762915  |
| H  | -4.0279905 | -5.1334210 | -0.9674332 |
| H  | -5.1953846 | -7.3249047 | -0.6145660 |
| H  | -5.1297659 | -8.4310877 | 1.6351330  |
| O  | -1.6627697 | -3.3657522 | 1.6223884  |
| Zn | -1.9137291 | -0.6692774 | -2.0913613 |

|    |            |            |            |
|----|------------|------------|------------|
| Br | -2.4686327 | -2.5275120 | -3.2974036 |
| H  | -5.4276481 | -3.4418536 | -0.0460329 |
| Br | 1.1484111  | -1.2976582 | 2.9125800  |
| Zn | -0.7280860 | -1.6454068 | 1.5804881  |
| C  | -4.2213261 | -2.4066234 | 1.4995850  |
| C  | -5.3154844 | -2.4657749 | 0.4692749  |
| C  | -3.5486697 | -1.1693267 | 1.3067514  |
| C  | -2.5677468 | -0.5146350 | 2.0573321  |
| C  | -3.8953358 | -0.7764994 | -0.0797640 |
| O  | -4.9269808 | -1.4910711 | -0.5351226 |
| O  | -3.3211426 | 0.0565972  | -0.8040794 |
| H  | -6.3095894 | -2.1641222 | 0.8663340  |
| H  | -4.3682605 | -2.8559898 | 2.4918574  |
| H  | -2.6667837 | -3.3489240 | -0.1943986 |
| H  | -2.2449843 | 0.4845473  | 1.7174743  |
| H  | -2.5356672 | -0.6929552 | 3.1441003  |

### int1-8-b; COSMO

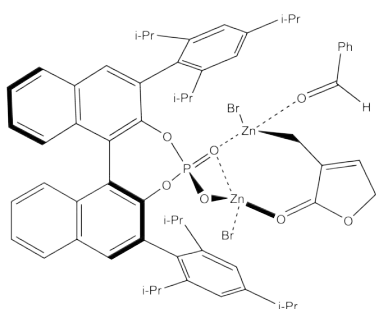

Energy(Hartree)= -11970.03381208

|   |            |            |            |
|---|------------|------------|------------|
| C | 0.6938609  | 2.4129519  | 0.7468199  |
| C | 2.0894712  | 2.4577657  | 0.7791061  |
| C | 2.7174784  | 3.7584907  | 0.7837494  |
| C | 4.1268434  | 3.9326736  | 0.6373017  |
| C | 1.8917673  | 4.9366622  | 0.9009325  |
| C | 2.5092488  | 6.2233894  | 0.9141343  |
| C | 0.4786902  | 4.7950762  | 1.0112275  |
| H | -0.1361065 | 5.6923677  | 1.1816071  |
| C | -0.1430487 | 3.5550298  | 0.9257374  |
| C | 3.6284785  | -0.8600176 | -0.3905802 |
| C | 4.6304983  | -1.0388639 | 0.5541580  |
| H | 5.3489920  | -1.8627128 | 0.4285061  |
| C | 4.7476354  | -0.1911263 | 1.6939443  |
| C | 5.7162550  | -0.4496753 | 2.7090578  |
| C | 3.8722171  | 0.9474261  | 1.8330565  |
| C | 3.9760293  | 1.7458854  | 3.0099437  |
| C | 2.9020995  | 1.2095257  | 0.7988663  |
| C | 2.7567618  | 0.2526322  | -0.2029788 |
| O | 0.0458665  | 1.1801674  | 0.6246444  |
| O | 1.7468725  | 0.4207579  | -1.1587059 |
| P | 0.1887842  | 0.2708446  | -0.7274438 |
| O | -0.6283557 | 0.7191850  | -1.9593009 |
| O | -0.3037283 | -1.1433745 | -0.2936030 |
| C | 3.8839964  | 6.3558463  | 0.7887038  |
| C | 4.6948171  | 5.1993447  | 0.6365878  |
| H | 1.8675345  | 7.1127098  | 1.0157019  |
| H | 4.3472442  | 7.3542603  | 0.7942848  |
| H | 4.7657666  | 3.0479137  | 0.5094887  |
| H | 5.7830911  | 5.3073133  | 0.5118037  |
| C | 4.9165728  | 1.4554480  | 3.9885390  |
| C | 5.8037883  | 0.3570606  | 3.8338876  |
| H | 3.2850507  | 2.5896060  | 3.1472613  |
| H | 4.9691331  | 2.0769325  | 4.8955380  |
| H | 6.5489279  | 0.1396273  | 4.6143214  |
| H | 6.3844227  | -1.3168763 | 2.5886547  |
| C | -2.5399647 | 3.3824638  | 0.0850315  |
| C | -1.6132831 | 3.3835018  | 1.1631272  |
| C | -3.9055503 | 3.2209879  | 0.3752775  |
| C | -2.0648401 | 3.2175820  | 2.5004714  |
| C | -3.4453293 | 3.0543122  | 2.7338029  |
| C | -4.3836442 | 3.0582164  | 1.6893730  |
| H | -4.6335130 | 3.2289798  | -0.4510897 |
| C | -1.0880635 | 3.1768522  | 3.6765784  |
| H | -3.7900049 | 2.9214689  | 3.7694522  |
| C | -0.7998357 | 1.7286984  | 4.1147401  |
| H | -1.7195620 | 1.2412591  | 4.5012786  |
| H | -0.0392930 | 1.7053923  | 4.9222346  |
| H | -0.4143687 | 1.1069950  | 3.2833972  |
| C | -1.5479366 | 4.0382482  | 4.8643666  |
| H | -0.1277392 | 3.6044962  | 3.3233490  |
| H | -2.4632933 | 3.6323488  | 5.3435673  |
| H | -1.7637352 | 5.0804986  | 4.5524907  |
| H | -0.7600266 | 4.0682113  | 5.6446365  |
| C | -5.8799173 | 2.8629616  | 1.9207585  |
| C | -6.2898616 | 1.4072548  | 1.6216448  |
| H | -7.3884866 | 1.2757621  | 1.7121354  |
| H | -5.7972346 | 0.7111029  | 2.3313279  |
| H | -5.9911547 | 1.1052851  | 0.5971370  |
| C | -6.3583259 | 3.2867389  | 3.3155807  |
| H | -6.3979490 | 3.5095455  | 1.1770220  |
| H | -7.4644813 | 3.2384703  | 3.3771648  |
| H | -6.0450122 | 4.3217962  | 3.5599169  |
| H | -5.9595322 | 2.6166962  | 4.1058777  |
| C | -2.0749340 | 3.6136436  | -1.3505905 |
| C | -2.9291397 | 2.8837386  | -2.3977933 |
| H | -2.4330393 | 2.9233196  | -3.3881814 |
| H | -3.9305723 | 3.3489249  | -2.5131611 |
| H | -3.0727010 | 1.8201963  | -2.1275690 |
| C | -2.0019826 | 5.1214221  | -1.6632509 |
| H | -1.0464931 | 3.2039784  | -1.4309786 |
| H | -1.6361623 | 5.2907198  | -2.6972988 |
| H | -1.3193663 | 5.6517159  | -0.9703969 |
| H | -3.0053673 | 5.5882635  | -1.5734678 |
| H | 2.3896969  | -5.0354173 | -4.9075524 |
| H | 5.9769010  | -0.3741330 | -4.6140666 |
| H | 3.0801430  | -4.7665286 | 1.4715903  |
| C | 2.7356924  | -4.0297164 | -5.2337351 |
| H | 4.1532196  | 2.1351845  | -3.8733834 |
| H | 1.2897621  | -3.9726755 | -6.8899279 |
| H | 0.6294542  | -4.5146640 | 0.7096986  |
| C | 3.0480562  | -3.2412243 | -3.9682262 |
| C | 5.9842763  | 0.0394877  | -3.5838639 |
| C | 1.5753712  | -3.3685935 | -6.0032979 |
| H | 1.8653811  | -2.3580414 | -6.3612223 |
| C | 3.6783081  | -1.9860850 | -4.0222496 |
| C | 3.4277446  | -4.4218195 | 0.4756751  |
| H | 4.7971624  | -4.7149804 | -5.5819238 |
| C | 2.6462225  | -3.7207891 | -2.7105537 |
| C | 3.9663050  | -4.2299531 | -6.1333863 |
| H | 3.7145094  | -4.8660397 | -7.0070430 |
| H | 2.1424025  | -4.6985940 | -2.6602618 |
| C | 3.6938584  | 1.1252437  | -3.8429378 |
| H | 6.4740713  | 1.0344708  | -3.6274785 |
| H | 6.6133796  | -0.6267837 | -2.9591130 |
| C | 3.8940188  | -1.2090436 | -2.8699664 |
| C | 1.0303525  | -4.3114754 | -0.3026906 |
| C | 2.8347740  | -2.9837996 | -1.5263882 |
| H | 4.3792465  | -3.8744092 | 0.6221411  |
| H | 3.6469633  | -5.3165675 | -0.1449939 |
| C | 4.5598919  | 0.1590690  | -3.0126491 |
| C | 3.4674335  | -1.7142049 | -1.6109467 |
| C | 2.3537732  | -3.5417439 | -0.1911365 |
| H | 2.6781946  | 1.2187236  | -3.4107787 |
| H | 0.2778140  | -3.7242946 | -0.8647527 |
| H | 3.5882838  | 0.7733594  | -4.8906310 |
| H | 0.6813149  | -3.2503664 | -5.3576582 |
| H | 1.1544228  | -5.2888130 | -0.8146304 |

|    |            |            |            |
|----|------------|------------|------------|
| H  | 4.3431496  | -3.2635438 | -6.5289203 |
| H  | 4.6574514  | 0.5952428  | -1.9972361 |
| H  | 2.1677622  | -2.6798779 | 0.4835248  |
| H  | 3.9975035  | -1.5853151 | -4.9977630 |
| C  | -4.4976352 | -6.6787891 | 1.4193828  |
| C  | -3.5328735 | -5.6736503 | 1.5214726  |
| C  | -3.2420938 | -4.8666026 | 0.3950832  |
| C  | -3.9201737 | -5.0775596 | -0.8293600 |
| C  | -4.8870602 | -6.0880518 | -0.9229471 |
| C  | -5.1742099 | -6.8857101 | 0.1986736  |
| H  | -4.7304064 | -7.3108809 | 2.2896864  |
| H  | -2.9916866 | -5.4876444 | 2.4614280  |
| C  | -2.2684136 | -3.7801816 | 0.4736034  |
| H  | -3.6791175 | -4.4431007 | -1.6986595 |
| H  | -5.4167733 | -6.2568581 | -1.8723684 |
| H  | -5.9329825 | -7.6800312 | 0.1242267  |
| O  | -1.6247993 | -3.4792269 | 1.4909179  |
| Zn | -1.7357420 | -0.9695971 | -2.0282618 |
| Br | -1.8668633 | -2.7684321 | -3.4583788 |
| H  | -5.7809148 | -3.4540563 | 0.5381582  |
| Br | 1.1502172  | -1.5902219 | 2.9610653  |
| Zn | -0.8695662 | -1.4921283 | 1.7654722  |
| C  | -4.7887566 | -1.9722053 | 1.8227121  |
| C  | -5.7147313 | -2.3581399 | 0.7248873  |
| C  | -3.7893143 | -1.1636499 | 1.3371960  |
| C  | -2.6496148 | -0.5091763 | 1.9664640  |
| C  | -4.0448298 | -1.0855245 | -0.1165001 |
| O  | -5.1582252 | -1.7534795 | -0.4614843 |
| O  | -3.3737774 | -0.5033803 | -0.9904360 |
| H  | -6.7506559 | -1.9725120 | 0.8537949  |
| H  | -4.9344675 | -2.2777839 | 2.8674623  |
| H  | -2.1181744 | -3.2078567 | -0.4789080 |
| H  | -2.4543779 | 0.4812719  | 1.5077330  |
| H  | -2.8053448 | -0.3824932 | 3.0542682  |

|   |            |            |            |
|---|------------|------------|------------|
| P | 0.1918975  | 0.2813090  | -0.7093958 |
| O | -0.6209798 | 0.7459633  | -1.9380170 |
| O | -0.3125362 | -1.1303296 | -0.2816458 |
| C | 3.8997166  | 6.3589061  | 0.8085458  |
| C | 4.7091714  | 5.2021698  | 0.6567156  |
| H | 1.8839932  | 7.1170413  | 1.0322314  |
| H | 4.3635456  | 7.3569963  | 0.8152998  |
| H | 4.7777030  | 3.0505662  | 0.5289832  |
| H | 5.7976861  | 5.3089540  | 0.5334701  |
| C | 4.9467315  | 1.4551265  | 3.9902821  |
| C | 5.8310503  | 0.3559813  | 3.8306069  |
| H | 3.3115951  | 2.5911525  | 3.1583934  |
| H | 5.0044176  | 2.0757685  | 4.8974425  |
| H | 6.5790524  | 0.1360743  | 4.6074787  |
| H | 6.4013245  | -1.3185477 | 2.5824575  |
| C | -2.5162546 | 3.3935369  | 0.0662508  |
| C | -1.6021366 | 3.3902188  | 1.1554512  |
| C | -3.8829707 | 3.2206091  | 0.3396415  |
| C | -2.0683026 | 3.2135493  | 2.4855666  |
| C | -3.4502858 | 3.0358501  | 2.7011336  |
| C | -4.3756767 | 3.0395910  | 1.6459977  |
| H | -4.6002152 | 3.2328277  | -0.4958773 |
| C | -1.1064152 | 3.1840547  | 3.6744851  |
| H | -3.8045457 | 2.8935619  | 3.7320155  |
| C | -0.8143347 | 1.7428031  | 4.1315364  |
| H | -1.7363136 | 1.2509236  | 4.5064173  |
| H | -0.0694478 | 1.7330096  | 4.9535357  |
| H | -0.4067948 | 1.1155672  | 3.3150504  |
| C | -1.5872808 | 4.0547405  | 4.8472889  |
| H | -0.1442217 | 3.6145348  | 3.3298752  |
| H | -2.5066664 | 3.6485025  | 5.3183861  |
| H | -1.8057511 | 5.0922927  | 4.5223589  |
| H | -0.8110381 | 4.0974492  | 5.6385166  |
| C | -5.8756544 | 2.8385170  | 1.8521764  |
| C | -6.3064201 | 1.4279544  | 1.4023250  |
| H | -7.4084051 | 1.3091369  | 1.4653754  |
| H | -5.8373309 | 0.6572194  | 2.0480805  |
| H | -5.9998032 | 1.2220113  | 0.3567704  |
| C | -6.3574950 | 3.1211485  | 3.2801602  |
| H | -6.3816048 | 3.5663718  | 1.1778075  |
| H | -7.4638936 | 3.0712158  | 3.3342342  |
| H | -6.0424449 | 4.1248194  | 3.6296307  |
| H | -5.9626448 | 2.3730005  | 3.9992870  |
| C | -2.0371966 | 3.6397320  | -1.3623877 |
| C | -2.8839047 | 2.9258493  | -2.4266315 |
| H | -2.3738064 | 2.9674086  | -3.4095626 |
| H | -3.8792641 | 3.4012302  | -2.5530470 |
| H | -3.0421908 | 1.8619622  | -2.1668050 |
| C | -1.9574450 | 5.1504620  | -1.6581080 |
| H | -1.0098130 | 3.2270030  | -1.4387239 |
| H | -1.5855070 | 5.3298585  | -2.6881626 |
| H | -1.2763943 | 5.6709934  | -0.9568225 |
| H | -2.9593444 | 5.6202139  | -1.5683271 |
| H | 2.3603512  | -5.0604919 | -4.8619997 |
| H | 5.9135562  | -0.3714505 | -4.6287493 |
| H | 3.1484606  | -4.7879528 | 1.4886460  |
| C | 2.6795231  | -4.0490599 | -5.1981979 |
| H | 4.0622009  | 2.1308483  | -3.9073671 |
| H | 1.1895193  | -4.0181308 | -6.8162107 |
| H | 0.6756163  | -4.5043905 | 0.7808184  |
| C | 3.0112119  | -3.2540192 | -3.9419057 |
| C | 5.9205349  | 0.0581583  | -3.6051733 |
| C | 1.4875354  | -3.4094881 | -5.9368291 |
| H | 1.7494837  | -2.3939327 | -6.3016840 |
| C | 3.6212511  | -1.9901041 | -4.0125031 |
| C | 3.4758436  | -4.4432325 | 0.4861573  |
| H | 4.7432878  | -4.6970260 | -5.5990501 |
| C | 2.6449233  | -3.7355772 | -2.6748298 |
| C | 3.8891783  | -4.2297770 | -6.1295046 |
| H | 3.6268382  | -4.8724439 | -6.9951652 |
| H | 2.1571446  | -4.7207289 | -2.6103403 |

### int1-8-b

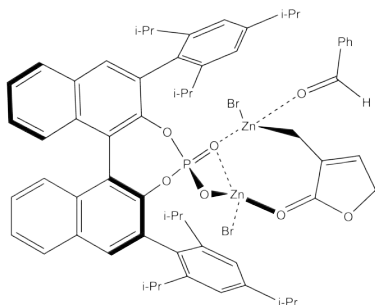

Energy(Hartree)= -11970.021046

|   |            |            |            |
|---|------------|------------|------------|
| C | 0.7066895  | 2.4185468  | 0.7636782  |
| C | 2.1024661  | 2.4622849  | 0.7963965  |
| C | 2.7309290  | 3.7629039  | 0.8006895  |
| C | 4.1403162  | 3.9364054  | 0.6556580  |
| C | 1.9063355  | 4.9417808  | 0.9170045  |
| C | 2.5252787  | 6.2272708  | 0.9318236  |
| C | 0.4930347  | 4.8014606  | 1.0220513  |
| H | -0.1227271 | 5.6988753  | 1.1884045  |
| C | -0.1296351 | 3.5623914  | 0.9345853  |
| C | 3.6327176  | -0.8560265 | -0.3829576 |
| C | 4.6391710  | -1.0357609 | 0.5565575  |
| H | 5.3538371  | -1.8622077 | 0.4266826  |
| C | 4.7635814  | -0.1893485 | 1.6961321  |
| C | 5.7363178  | -0.4494778 | 2.7061977  |
| C | 3.8901007  | 0.9498403  | 1.8407727  |
| C | 4.0013552  | 1.7471770  | 3.0174515  |
| C | 2.9144254  | 1.2134955  | 0.8122497  |
| C | 2.7631152  | 0.2572878  | -0.1896507 |
| O | 0.0569871  | 1.1866850  | 0.6467778  |
| O | 1.7498110  | 0.4258285  | -1.1406024 |

|    |            |            |            |   |           |           |           |
|----|------------|------------|------------|---|-----------|-----------|-----------|
| C  | 3.6164967  | 1.1152465  | -3.8660990 | C | 2.500798  | 3.696892  | 2.353900  |
| H  | 6.3989130  | 1.0577766  | -3.6663183 | C | 3.919263  | 3.832312  | 2.275781  |
| H  | 6.5601325  | -0.5919713 | -2.9744301 | C | 1.712405  | 4.895716  | 2.517555  |
| C  | 3.8508831  | -1.2067853 | -2.8678164 | C | 2.373950  | 6.150142  | 2.675188  |
| C  | 1.0621917  | -4.3090181 | -0.2387519 | C | 0.290640  | 4.819916  | 2.462857  |
| C  | 2.8472322  | -2.9923751 | -1.4971560 | H | -0.294318 | 5.745286  | 2.580115  |
| H  | 4.4348399  | -3.9040064 | 0.6127584  | C | -0.370484 | 3.624107  | 2.213634  |
| H  | 3.6750298  | -5.3369415 | -0.1425501 | C | 3.061444  | -1.029062 | 1.093174  |
| C  | 4.4972338  | 0.1685197  | -3.0293556 | C | 4.081360  | -1.262916 | 2.007921  |
| C  | 3.4592564  | -1.7142024 | -1.5984401 | H | 4.695019  | -2.169882 | 1.897691  |
| C  | 2.3948993  | -3.5518158 | -0.1528305 | C | 4.314567  | -0.404794 | 3.114913  |
| H  | 2.6007521  | 1.1995338  | -3.4328001 | C | 5.285772  | -0.735418 | 4.106253  |
| H  | 0.3074117  | -3.7149170 | -0.7904828 | C | 3.521672  | 0.790952  | 3.261769  |
| H  | 3.5124950  | 0.7536652  | -4.9105333 | C | 3.702034  | 1.568361  | 4.446044  |
| H  | 0.6079148  | -3.3056667 | -5.2695583 | C | 2.558386  | 1.126896  | 2.237450  |
| H  | 1.1669641  | -5.2890620 | -0.7500443 | C | 2.312957  | 0.180770  | 1.228546  |
| H  | 4.2381031  | -3.2581599 | -6.5374296 | O | -0.242732 | 1.221095  | 2.087768  |
| H  | 4.5947156  | 0.6174759  | -2.0194781 | O | 1.343292  | 0.431697  | 0.263104  |
| H  | 2.2296943  | -2.6923142 | 0.5301081  | P | -0.253389 | 0.372817  | 0.683244  |
| H  | 3.9131229  | -1.5874326 | -4.9956567 | O | -0.951892 | 1.173143  | -0.426652 |
| C  | -4.4575499 | -6.6918399 | 1.3843535  | O | -0.709167 | -1.036117 | 1.021246  |
| C  | -3.4970022 | -5.6829816 | 1.4884490  | C | 3.756594  | 6.240598  | 2.628337  |
| C  | -3.2300996 | -4.8531750 | 0.3736771  | C | 4.531288  | 5.071604  | 2.407765  |
| C  | -3.9269466 | -5.0449070 | -0.8425032 | H | 1.757996  | 7.052634  | 2.814962  |
| C  | -4.8898063 | -6.0596459 | -0.9379538 | H | 4.252381  | 7.216661  | 2.742417  |
| C  | -5.1537950 | -6.8801110 | 0.1721758  | H | 4.532483  | 2.937626  | 2.101217  |
| H  | -4.6706354 | -7.3425225 | 2.2460905  | H | 5.627071  | 5.147504  | 2.336370  |
| H  | -2.9376109 | -5.5089557 | 2.4201087  | C | 4.639629  | 1.208784  | 5.404509  |
| C  | -2.2557781 | -3.7642242 | 0.4591010  | C | 5.451990  | 0.056741  | 5.230458  |
| H  | -3.7023103 | -4.3917783 | -1.7027181 | H | 3.074367  | 2.455575  | 4.604943  |
| H  | -5.4337095 | -6.2143995 | -1.8818724 | H | 4.747560  | 1.818858  | 6.314114  |
| H  | -5.9084218 | -7.6781989 | 0.0952139  | H | 6.194844  | -0.215358 | 5.995629  |
| O  | -1.6048437 | -3.4840721 | 1.4758203  | H | 5.883711  | -1.650069 | 3.967586  |
| Zn | -1.7665934 | -0.9053237 | -2.0151474 | C | -2.329804 | 4.007747  | 0.667211  |
| Br | -2.0373830 | -2.6732872 | -3.4553160 | C | -1.827015 | 3.502014  | 1.902139  |
| H  | -5.7449603 | -3.4191498 | 0.4888254  | C | -3.628710 | 3.628642  | 0.274856  |
| Br | 1.1870281  | -1.5823737 | 2.9727389  | C | -2.669256 | 2.746042  | 2.760721  |
| Zn | -0.8234616 | -1.5063221 | 1.7810044  | C | -3.959585 | 2.400933  | 2.322199  |
| C  | -4.7559462 | -2.0064169 | 1.8536295  | C | -4.450611 | 2.804618  | 1.068294  |
| C  | -5.6791221 | -2.3340820 | 0.7326389  | H | -4.022590 | 3.987324  | -0.687759 |
| C  | -3.7575558 | -1.1690879 | 1.4148794  | C | -2.230607 | 2.387104  | 4.178255  |
| C  | -2.6157815 | -0.5516134 | 2.0681111  | H | -4.597493 | 1.800318  | 2.988033  |
| C  | -4.0085857 | -1.0167541 | -0.0357853 | C | -2.413560 | 0.904273  | 4.514450  |
| O  | -5.1196288 | -1.6700352 | -0.4183371 | H | -3.478861 | 0.595651  | 4.502264  |
| O  | -3.3294594 | -0.3925125 | -0.8699173 | H | -2.023509 | 0.677502  | 5.527722  |
| H  | -6.7151368 | -1.9519349 | 0.8763215  | H | -1.879526 | 0.255240  | 3.797811  |
| H  | -4.8997737 | -2.3704605 | 2.8795823  | C | -2.959293 | 3.291420  | 5.192122  |
| H  | -2.1150633 | -3.1761150 | -0.4852345 | H | -1.147990 | 2.617273  | 4.261882  |
| H  | -2.4200763 | 0.4609079  | 1.6611564  | H | -4.055631 | 3.118978  | 5.160741  |
| H  | -2.7478294 | -0.4937208 | 3.1645741  | H | -2.782331 | 4.366000  | 4.982259  |
|    |            |            |            | H | -2.614195 | 3.077257  | 6.225011  |
|    |            |            |            | C | -5.830381 | 2.382020  | 0.571100  |
|    |            |            |            | C | -5.777062 | 0.996463  | -0.101805 |
|    |            |            |            | H | -6.783676 | 0.691336  | -0.457929 |
|    |            |            |            | H | -5.411967 | 0.223061  | 0.606243  |
|    |            |            |            | H | -5.103478 | 1.004943  | -0.980516 |
|    |            |            |            | C | -6.905937 | 2.410852  | 1.668465  |
|    |            |            |            | H | -6.123726 | 3.115684  | -0.212032 |
|    |            |            |            | H | -7.910184 | 2.233426  | 1.232012  |
|    |            |            |            | H | -6.925673 | 3.384370  | 2.198271  |
|    |            |            |            | H | -6.737879 | 1.616703  | 2.425515  |
|    |            |            |            | C | -1.509298 | 4.947866  | -0.223378 |
|    |            |            |            | C | -0.724778 | 4.216867  | -1.328074 |
|    |            |            |            | H | -0.098509 | 4.937680  | -1.894225 |
|    |            |            |            | H | -1.415677 | 3.732879  | -2.049418 |
|    |            |            |            | H | -0.065704 | 3.432242  | -0.910685 |
|    |            |            |            | C | -2.361427 | 6.085210  | -0.811486 |
|    |            |            |            | H | -0.751739 | 5.426674  | 0.426602  |
|    |            |            |            | H | -1.709875 | 6.832439  | -1.309525 |
|    |            |            |            | H | -2.943066 | 6.606262  | -0.023860 |
|    |            |            |            | H | -3.076978 | 5.717233  | -1.575287 |

### 7.2.3.10 to 15l-ma

#### TS1-8-l; woelfling data

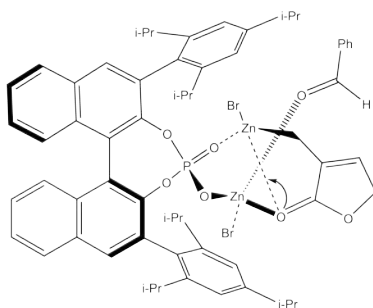

Energy(Hartree)= -11970.001501

|   |          |          |          |
|---|----------|----------|----------|
| C | 0.428346 | 2.434402 | 2.164354 |
| C | 1.823135 | 2.423813 | 2.256852 |

|    |           |           |           |
|----|-----------|-----------|-----------|
| H  | 2.470062  | -6.245568 | -2.251509 |
| H  | 5.088904  | -1.204228 | -3.278842 |
| H  | 2.551105  | -4.834708 | 3.593075  |
| C  | 2.498268  | -5.310504 | -2.853014 |
| H  | 3.070684  | 1.215708  | -3.092010 |
| H  | 1.042276  | -6.080141 | -4.316765 |
| H  | 0.061157  | -4.231802 | 2.964509  |
| C  | 2.593321  | -4.154594 | -1.865505 |
| C  | 5.063507  | -0.585738 | -2.357117 |
| C  | 1.182238  | -5.212611 | -3.637159 |
| H  | 1.197838  | -4.292248 | -4.252877 |
| C  | 2.995428  | -2.863430 | -2.249992 |
| C  | 2.852979  | -4.638324 | 2.544146  |
| H  | 4.652957  | -5.476591 | -3.267114 |
| C  | 2.226374  | -4.354865 | -0.526331 |
| C  | 3.692356  | -5.404787 | -3.814295 |
| H  | 3.598168  | -6.296731 | -4.467533 |
| H  | 1.878015  | -5.355190 | -0.220230 |
| C  | 2.683345  | 0.216388  | -2.803096 |
| H  | 5.478332  | 0.411001  | -2.613246 |
| H  | 5.741083  | -1.060141 | -1.618485 |
| C  | 3.104236  | -1.808866 | -1.323370 |
| C  | 0.441818  | -4.188813 | 1.924564  |
| C  | 2.304897  | -3.335091 | 0.437631  |
| H  | 3.892005  | -4.253065 | 2.551391  |
| H  | 2.863641  | -5.611376 | 2.009189  |
| C  | 3.634567  | -0.457078 | -1.797094 |
| C  | 2.783038  | -2.054587 | 0.039508  |
| C  | 1.880618  | -3.653781 | 1.870783  |
| H  | 1.675290  | 0.353576  | -2.365029 |
| H  | -0.223871 | -3.521235 | 1.346585  |
| H  | 2.582013  | -0.383615 | -3.732575 |
| H  | 0.305952  | -5.151117 | -2.958827 |
| H  | 0.350737  | -5.203432 | 1.483592  |
| H  | 3.748899  | -4.518859 | -4.480758 |
| H  | 3.695731  | 0.208207  | -0.912691 |
| H  | 1.892223  | -2.706633 | 2.446011  |
| H  | 3.270178  | -2.671906 | -3.299630 |
| C  | -0.834658 | -3.588498 | -5.750865 |
| C  | -0.918051 | -2.527928 | -4.844276 |
| C  | -1.192658 | -1.223624 | -5.318346 |
| C  | -1.345745 | -0.991864 | -6.704337 |
| C  | -1.216186 | -2.052562 | -7.610496 |
| C  | -0.969781 | -3.350369 | -7.131428 |
| H  | -0.651800 | -4.608891 | -5.388472 |
| H  | -0.787146 | -2.680369 | -3.761267 |
| C  | -1.397242 | -0.125333 | -4.370511 |
| H  | -1.571312 | 0.024795  | -7.062852 |
| H  | -1.316773 | -1.875143 | -8.691309 |
| H  | -0.877803 | -4.190322 | -7.837053 |
| O  | -1.257487 | -0.259468 | -3.146484 |
| Zn | -2.344379 | 0.947436  | -1.727598 |
| Br | -3.627766 | 2.256481  | -3.173505 |
| H  | -3.451679 | -3.187069 | -4.376221 |
| Br | -2.835250 | -2.485939 | 3.666995  |
| Zn | -2.222963 | -2.303469 | 1.418220  |
| C  | -3.678949 | -3.980476 | -2.349753 |
| C  | -4.067512 | -3.062858 | -3.458023 |
| C  | -3.278656 | -3.263727 | -1.262267 |
| C  | -2.792683 | -3.683146 | 0.075062  |
| C  | -3.384066 | -1.845135 | -1.676512 |
| O  | -3.837062 | -1.737798 | -2.941930 |
| O  | -3.095798 | -0.843917 | -1.003154 |
| H  | -5.137802 | -3.140870 | -3.750295 |
| H  | -3.594709 | -4.251587 | 0.595523  |
| H  | -1.957784 | -4.406408 | -0.050016 |
| H  | -3.719906 | -5.076367 | -2.423624 |
| H  | -1.749888 | 0.854015  | -4.786917 |

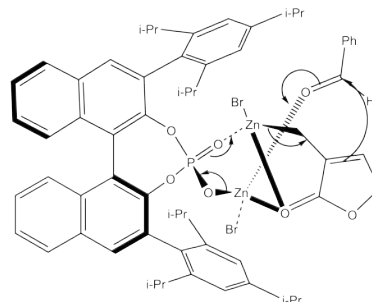

Energy(Hartree)= -11969.9952751

|   |            |            |            |
|---|------------|------------|------------|
| C | 0.2694185  | 2.2222110  | 2.2314341  |
| C | 1.6627185  | 2.3156543  | 2.3078892  |
| C | 2.2468265  | 3.6366320  | 2.3391483  |
| C | 3.6499618  | 3.8662529  | 2.2148186  |
| C | 1.3781499  | 4.7802522  | 2.4819219  |
| C | 1.9513289  | 6.0845269  | 2.5764993  |
| C | -0.0341488 | 4.5973538  | 2.4701096  |
| H | -0.6826637 | 5.4803050  | 2.5780191  |
| C | -0.6127881 | 3.3492404  | 2.2661245  |
| C | 3.0766945  | -1.1320023 | 1.3609629  |
| C | 4.1219144  | -1.2515178 | 2.2695618  |
| H | 4.7615521  | -2.1465979 | 2.2357316  |
| C | 4.3419822  | -0.2898105 | 3.2952357  |
| C | 5.3561404  | -0.4855669 | 4.2808484  |
| C | 3.4850273  | 0.8680859  | 3.3804795  |
| C | 3.6368170  | 1.7343763  | 4.5053227  |
| C | 2.4942354  | 1.0818645  | 2.3501431  |
| C | 2.3049026  | 0.0687555  | 1.4028034  |
| O | -0.3247237 | 0.9563773  | 2.1826444  |
| O | 1.3404028  | 0.2392803  | 0.4048164  |
| P | -0.2461839 | 0.0901308  | 0.8055804  |
| O | -1.0164422 | 0.7371134  | -0.3454238 |
| O | -0.6186996 | -1.3512102 | 1.1902081  |
| C | 3.3228671  | 6.2687568  | 2.4861759  |
| C | 4.1745114  | 5.1498792  | 2.2840746  |
| H | 1.2771833  | 6.9464624  | 2.7014206  |
| H | 3.7515499  | 7.2804070  | 2.5514187  |
| H | 4.3208994  | 3.0112557  | 2.0531548  |
| H | 5.2595521  | 5.3008858  | 2.1772859  |
| C | 4.6181465  | 1.5045069  | 5.4599651  |
| C | 5.5001556  | 0.3974986  | 5.3399101  |
| H | 2.9571941  | 2.5894859  | 4.6212839  |
| H | 4.7080866  | 2.1841073  | 6.3211362  |
| H | 6.2806764  | 0.2318910  | 6.0980437  |
| H | 6.0099355  | -1.3675262 | 4.1931673  |
| C | -2.6340706 | 3.6707065  | 0.7907934  |
| C | -2.0666781 | 3.1448915  | 1.9919758  |
| C | -3.9509282 | 3.3016265  | 0.4620975  |
| C | -2.8538344 | 2.3367611  | 2.8588259  |
| C | -4.1619678 | 1.9980218  | 2.4734269  |
| C | -4.7190010 | 2.4390944  | 1.2624782  |
| H | -4.3945270 | 3.6685948  | -0.4733941 |
| C | -2.3436088 | 1.8807992  | 4.2249524  |
| H | -4.7607532 | 1.3557708  | 3.1382101  |
| C | -2.5343016 | 0.3742239  | 4.4689713  |
| H | -3.6078512 | 0.0994060  | 4.5302652  |
| H | -2.0660191 | 0.0766926  | 5.4297500  |
| H | -2.0711736 | -0.2243871 | 3.6606000  |
| C | -3.0013402 | 2.7186679  | 5.3393527  |
| H | -1.2550506 | 2.0877808  | 4.2702429  |
| H | -4.1010888 | 2.5670634  | 5.3554534  |
| H | -2.8143903 | 3.8019171  | 5.1921033  |
| H | -2.6043998 | 2.4320389  | 6.3355015  |
| C | -6.0956984 | 1.9734839  | 0.8092476  |
| C | -6.0939948 | 0.4565412  | 0.5397423  |
| H | -7.0810931 | 0.1241084  | 0.1560228  |

TS2-8-I; COSMO

|    |            |            |            |    |            |            |            |
|----|------------|------------|------------|----|------------|------------|------------|
| H  | -5.8843127 | -0.1146490 | 1.4684692  | Br | -2.0345310 | -4.9772489 | 0.3387756  |
| H  | -5.3213559 | 0.1806193  | -0.2046695 | Zn | -1.4434122 | -2.7598931 | 0.0796078  |
| C  | -7.2021935 | 2.3701551  | 1.8019732  | C  | -2.3905807 | -2.0824139 | -4.0669697 |
| H  | -6.3052229 | 2.4833108  | -0.1564420 | C  | -3.9015762 | -2.0522194 | -4.0260924 |
| H  | -8.1999028 | 2.0714212  | 1.4188141  | C  | -1.9529230 | -2.0795981 | -2.7153814 |
| H  | -7.2147739 | 3.4648824  | 1.9791341  | C  | -0.6911239 | -2.0692951 | -2.1450210 |
| H  | -7.0622437 | 1.8715012  | 2.7841771  | C  | -3.1567036 | -1.8446488 | -1.8877764 |
| C  | -1.8477494 | 4.5841190  | -0.1611402 | O  | -4.2579821 | -1.8214590 | -2.6310713 |
| C  | -0.9151653 | 3.8060141  | -1.1093702 | O  | -3.1798562 | -1.7621794 | -0.6451852 |
| H  | -0.2904884 | 4.4976400  | -1.7104110 | H  | -4.3778798 | -3.0111221 | -4.3214721 |
| H  | -1.5330928 | 3.2341165  | -1.8455791 | H  | -0.4976818 | -1.4269345 | -1.2711305 |
| H  | -0.2463874 | 3.1085435  | -0.5720441 | H  | 0.2077328  | -2.3608435 | -2.6980777 |
| C  | -2.7364747 | 5.5424686  | -0.9691525 | H  | -1.8817715 | -2.6365824 | -4.8664392 |
| H  | -1.1831679 | 5.2139608  | 0.4622862  | H  | -2.5973057 | 0.2510320  | -4.7227016 |
| H  | -2.1072568 | 6.2782371  | -1.5099158 |    |            |            |            |
| H  | -3.4360102 | 6.1015411  | -0.3159798 |    |            |            |            |
| H  | -3.3364457 | 5.0037883  | -1.7313025 |    |            |            |            |
| H  | 1.4455633  | -6.4229161 | -1.5405809 |    |            |            |            |
| H  | 5.1130173  | -2.0105833 | -2.7304686 |    |            |            |            |
| H  | 2.9191938  | -4.7454083 | 4.0948780  |    |            |            |            |
| C  | 1.6430655  | -5.5577567 | -2.2106313 |    |            |            |            |
| H  | 3.2986690  | 0.6552297  | -3.0590219 |    |            |            |            |
| H  | 0.0509621  | -6.2022377 | -3.5716845 |    |            |            |            |
| H  | 0.4693072  | -4.1932816 | 3.9917927  |    |            |            |            |
| C  | 2.0027547  | -4.3869420 | -1.3006625 |    |            |            |            |
| C  | 5.0745504  | -1.2284513 | -1.9433265 |    |            |            |            |
| C  | 0.3468658  | -5.2971051 | -3.0017577 |    |            |            |            |
| H  | 0.4856397  | -4.4740391 | -3.7353367 |    |            |            |            |
| C  | 2.5970552  | -3.2127166 | -1.7991471 |    |            |            |            |
| C  | 2.9847016  | -4.6408509 | 2.9920669  |    |            |            |            |
| H  | 3.7353830  | -6.1294045 | -2.5916122 |    |            |            |            |
| C  | 1.7529759  | -4.4583513 | 0.0822312  |    |            |            |            |
| C  | 2.7955208  | -5.9474292 | -3.1511428 |    |            |            |            |
| H  | 2.5440117  | -6.8703899 | -3.7127873 |    |            |            |            |
| H  | 1.2841002  | -5.3702187 | 0.4842562  |    |            |            |            |
| C  | 2.8403916  | -0.3018641 | -2.7358814 |    |            |            |            |
| H  | 5.5908120  | -0.3272785 | -2.3346318 |    |            |            |            |
| H  | 5.6475407  | -1.6020416 | -1.0703981 |    |            |            |            |
| C  | 2.9360099  | -2.1326872 | -0.9627671 |    |            |            |            |
| C  | 0.5205366  | -4.0737071 | 2.8899760  |    |            |            |            |
| C  | 2.1101836  | -3.4244830 | 0.9708143  |    |            |            |            |
| H  | 4.0167874  | -4.3251972 | 2.7376641  |    |            |            |            |
| H  | 2.8255173  | -5.6447821 | 2.5457634  |    |            |            |            |
| C  | 3.6197600  | -0.9030110 | -1.5558537 |    |            |            |            |
| C  | 2.7038055  | -2.2452222 | 0.4339861  |    |            |            |            |
| C  | 1.9335697  | -3.6371352 | 2.4762443  |    |            |            |            |
| H  | 1.7830275  | -0.1016074 | -2.4712961 |    |            |            |            |
| H  | -0.2322719 | -3.3165282 | 2.5994322  |    |            |            |            |
| H  | 2.8523882  | -0.9796621 | -3.6151851 |    |            |            |            |
| H  | -0.4888207 | -5.0233010 | -2.3278753 |    |            |            |            |
| H  | 0.2214240  | -5.0387296 | 2.4343953  |    |            |            |            |
| H  | 2.9969153  | -5.1538981 | -3.9011082 |    |            |            |            |
| H  | 3.6615262  | -0.1281129 | -0.7643465 |    |            |            |            |
| H  | 2.1255071  | -2.6674752 | 2.9767773  |    |            |            |            |
| H  | 2.8134058  | -3.1347109 | -2.8767050 |    |            |            |            |
| C  | 1.1916597  | -1.2187135 | -6.9685340 |    |            |            |            |
| C  | 0.5262489  | -0.8143792 | -5.8029826 |    |            |            |            |
| C  | -0.8614792 | -0.5570706 | -5.8279512 |    |            |            |            |
| C  | -1.5686077 | -0.7000589 | -7.0427887 |    |            |            |            |
| C  | -0.9001947 | -1.0992532 | -8.2079503 |    |            |            |            |
| C  | 0.4814954  | -1.3639027 | -8.1735940 |    |            |            |            |
| H  | 2.2743896  | -1.4176723 | -6.9400144 |    |            |            |            |
| H  | 1.0661689  | -0.6829422 | -4.8549686 |    |            |            |            |
| C  | -1.5725259 | -0.1627059 | -4.5879396 |    |            |            |            |
| H  | -2.6508859 | -0.4921314 | -7.0696445 |    |            |            |            |
| H  | -1.4573259 | -1.2017195 | -9.1519333 |    |            |            |            |
| H  | 1.0049948  | -1.6790865 | -9.0892983 |    |            |            |            |
| O  | -0.8544838 | 0.2900273  | -3.5957439 |    |            |            |            |
| Zn | -1.8300303 | 1.0286230  | -2.0627652 |    |            |            |            |
| Br | -3.9900323 | 1.6482515  | -2.6938587 |    |            |            |            |
| H  | -4.3623187 | -1.2334426 | -4.6179942 |    |            |            |            |

### TS2-8-1

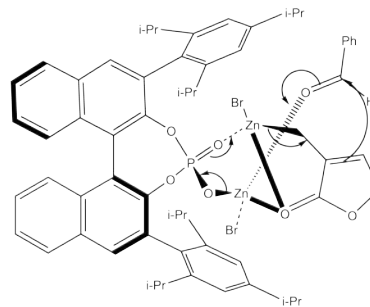

Energy(Hartree)= -11969.98423081  
number of imaginary frequencies: 2

|   |            |            |            |
|---|------------|------------|------------|
| C | 0.2602113  | 2.2266291  | 2.2759710  |
| C | 1.6529190  | 2.3139462  | 2.3697108  |
| C | 2.2400265  | 3.6332340  | 2.4263379  |
| C | 3.6446682  | 3.8621776  | 2.3214614  |
| C | 1.3726190  | 4.7770851  | 2.5749564  |
| C | 1.9481710  | 6.0775410  | 2.6968862  |
| C | -0.0395924 | 4.5987034  | 2.5381732  |
| H | -0.6883678 | 5.4816082  | 2.6456508  |
| C | -0.6192414 | 3.3560299  | 2.3077180  |
| C | 3.0915052  | -1.1033851 | 1.3467133  |
| C | 4.1382580  | -1.2335197 | 2.2517964  |
| H | 4.7903128  | -2.1182885 | 2.1915406  |
| C | 4.3448841  | -0.2984459 | 3.3044217  |
| C | 5.3595379  | -0.5078033 | 4.2860525  |
| C | 3.4761947  | 0.8480442  | 3.4181603  |
| C | 3.6193448  | 1.6880734  | 4.5634444  |
| C | 2.4836486  | 1.0785716  | 2.3932757  |
| C | 2.3016909  | 0.0841450  | 1.4246518  |
| O | -0.3381331 | 0.9653330  | 2.2107880  |
| O | 1.3325735  | 0.2625648  | 0.4347627  |
| P | -0.2527996 | 0.1011963  | 0.8337958  |
| O | -1.0176823 | 0.7478802  | -0.3225938 |
| O | -0.6212779 | -1.3391414 | 1.2230800  |
| C | 3.3205573  | 6.2601691  | 2.6268072  |
| C | 4.1712814  | 5.1428405  | 2.4172716  |
| H | 1.2744106  | 6.9391483  | 2.8262792  |
| H | 3.7504252  | 7.2696544  | 2.7133017  |
| H | 4.3150804  | 3.0080617  | 2.1543223  |
| H | 5.2578592  | 5.2923149  | 2.3256131  |
| C | 4.6020941  | 1.4446811  | 5.5126303  |
| C | 5.4942600  | 0.3497672  | 5.3664456  |
| H | 2.9311191  | 2.5335413  | 4.6977021  |
| H | 4.6849820  | 2.1040535  | 6.3900002  |
| H | 6.2757865  | 0.1728102  | 6.1208967  |
| H | 6.0220089  | -1.3808928 | 4.1773026  |
| C | -2.6006429 | 3.7027443  | 0.7866675  |



|   |            |            |            |    |            |            |            |
|---|------------|------------|------------|----|------------|------------|------------|
| C | -2.0672291 | 3.1620184  | 1.9968042  | H  | 2.8758712  | -4.8236863 | -4.1620400 |
| C | -3.9124969 | 3.3492149  | 0.4237953  | H  | 3.6311683  | -0.0015253 | -0.7360962 |
| C | -2.8803898 | 2.3499394  | 2.8349107  | H  | 2.2413008  | -2.7451076 | 2.9118862  |
| C | -4.1818600 | 2.0274128  | 2.4154229  | H  | 2.8009152  | -2.9231852 | -2.9693692 |
| C | -4.7084785 | 2.4892111  | 1.1988510  | C  | 1.1520734  | -1.8496297 | -6.7154532 |
| H | -4.3310481 | 3.7292612  | -0.5179592 | C  | 0.5028873  | -1.2565680 | -5.6245539 |
| C | -2.4061746 | 1.8760172  | 4.2078720  | C  | -0.8314558 | -0.8100842 | -5.7455814 |
| H | -4.8016514 | 1.3839583  | 3.0593065  | C  | -1.4964436 | -0.9539546 | -6.9836978 |
| C | -2.6132446 | 0.3686986  | 4.4321526  | C  | -0.8418526 | -1.5388914 | -8.0752868 |
| H | -3.6896034 | 0.1002346  | 4.4638934  | C  | 0.4828485  | -1.9938616 | -7.9432972 |
| H | -2.1717717 | 0.0579970  | 5.4013057  | H  | 2.1913891  | -2.1983844 | -6.6099218 |
| H | -2.1339445 | -0.2264862 | 3.6309662  | H  | 1.0137333  | -1.1210963 | -4.6613658 |
| C | -3.0835871 | 2.7081133  | 5.3146044  | C  | -1.5339716 | -0.2380595 | -4.5760049 |
| H | -1.3173832 | 2.0740962  | 4.2805604  | H  | -2.5358837 | -0.6009197 | -7.0850431 |
| H | -4.1845153 | 2.5661022  | 5.3029087  | H  | -1.3651716 | -1.6404651 | -9.0384569 |
| H | -2.8854485 | 3.7911077  | 5.1822884  | H  | 0.9941910  | -2.4571209 | -8.8009415 |
| H | -2.7134615 | 2.4090413  | 6.3173687  | O  | -0.8152342 | 0.1914750  | -3.5816707 |
| C | -6.0845359 | 2.0525609  | 0.7154617  | Zn | -1.7910789 | 0.9787293  | -2.0642790 |
| C | -6.0986053 | 0.5449351  | 0.4005175  | Br | -3.8760122 | 1.7342198  | -2.7732015 |
| H | -7.0880873 | 0.2341945  | 0.0052950  | H  | -4.4766443 | -1.0732000 | -4.4208618 |
| H | -5.8943756 | -0.0581689 | 1.3097589  | Br | -2.0380688 | -4.9813789 | 0.3736958  |
| H | -5.3303497 | 0.2835618  | -0.3525112 | Zn | -1.5172193 | -2.7508648 | 0.1723552  |
| C | -7.1980302 | 2.4350928  | 1.7056848  | C  | -2.5678242 | -2.0855908 | -3.9409881 |
| H | -6.2761462 | 2.5931841  | -0.2372132 | C  | -4.0704110 | -1.9393343 | -3.8551125 |
| H | -8.1948234 | 2.1633224  | 1.3009390  | C  | -2.0849241 | -2.0642990 | -2.6074265 |
| H | -7.1969053 | 3.5234733  | 1.9177690  | C  | -0.8037292 | -2.0876135 | -2.0784888 |
| H | -7.0799493 | 1.9042117  | 2.6736106  | C  | -3.2512928 | -1.7774025 | -1.7424600 |
| C | -1.7827947 | 4.6166512  | -0.1380267 | O  | -4.3739167 | -1.7034025 | -2.4518472 |
| C | -0.8277046 | 3.8377738  | -1.0631980 | O  | -3.2343852 | -1.6972428 | -0.5004904 |
| H | -0.1800737 | 4.5310136  | -1.6379601 | H  | -4.6320074 | -2.8508779 | -4.1531162 |
| H | -1.4234644 | 3.2687837  | -1.8166462 | H  | -0.5596561 | -1.4661581 | -1.2032709 |
| H | -0.1788421 | 3.1340734  | -0.5095576 | H  | 0.0670063  | -2.4230363 | -2.6500216 |
| C | -2.6439157 | 5.5826098  | -0.9665010 | H  | -2.1212828 | -2.6848950 | -4.7441278 |
| H | -1.1343439 | 5.2409002  | 0.5079020  | H  | -2.5199195 | 0.2428283  | -4.7646661 |
| H | -1.9971350 | 6.3186348  | -1.4859136 |    |            |            |            |
| H | -3.3600917 | 6.1414166  | -0.3315367 |    |            |            |            |
| H | -3.2233465 | 5.0499720  | -1.7483842 |    |            |            |            |
| H | 1.6354776  | -6.3234099 | -1.7555017 |    |            |            |            |
| H | 5.0892735  | -1.7657668 | -2.8027109 |    |            |            |            |
| H | 3.0628782  | -4.8702912 | 3.9117883  |    |            |            |            |
| C | 1.7104028  | -5.4117575 | -2.3880412 |    |            |            |            |
| H | 3.2156403  | 0.8884870  | -2.9740585 |    |            |            |            |
| H | 0.0646377  | -6.1242439 | -3.6466013 |    |            |            |            |
| H | 0.6059097  | -4.3192660 | 3.8878377  |    |            |            |            |
| C | 2.0531704  | -4.2667823 | -1.4378394 |    |            |            |            |
| C | 5.0464482  | -1.0205252 | -1.9808566 |    |            |            |            |
| C | 0.3375304  | -5.2214308 | -3.0617869 |    |            |            |            |
| H | 0.3569388  | -4.3647672 | -3.7694134 |    |            |            |            |
| C | 2.6064934  | -3.0556781 | -1.8932177 |    |            |            |            |
| C | 3.1025810  | -4.7134502 | 2.8140073  |    |            |            |            |
| H | 3.8026482  | -5.7866959 | -2.9675535 |    |            |            |            |
| C | 1.8324084  | -4.4057637 | -0.0551729 |    |            |            |            |
| C | 2.8059630  | -5.6617720 | -3.4368122 |    |            |            |            |
| H | 2.5825160  | -6.5769838 | -4.0222067 |    |            |            |            |
| H | 1.3930029  | -5.3459236 | 0.3143031  |    |            |            |            |
| C | 2.7875876  | -0.0980620 | -2.7024099 |    |            |            |            |
| H | 5.5417565  | -0.0936300 | -2.3376331 |    |            |            |            |
| H | 5.6376809  | -1.4227546 | -1.1334162 |    |            |            |            |
| C | 2.9385766  | -2.0075564 | -1.0145400 |    |            |            |            |
| C | 0.6347528  | -4.1449526 | 2.7926164  |    |            |            |            |
| C | 2.1810964  | -3.4046638 | 0.8727772  |    |            |            |            |
| H | 4.1280902  | -4.3834866 | 2.5506586  |    |            |            |            |
| H | 2.9368680  | -5.6962581 | 2.3255068  |    |            |            |            |
| C | 3.5911359  | -0.7400495 | -1.5614592 |    |            |            |            |
| C | 2.7354118  | -2.1878455 | 0.3799104  |    |            |            |            |
| C | 2.0385971  | -3.6896584 | 2.3698202  |    |            |            |            |
| H | 1.7258550  | 0.0538517  | -2.4258284 |    |            |            |            |
| H | -0.1218006 | -3.3719122 | 2.5584058  |    |            |            |            |
| H | 2.8157510  | -0.7213890 | -3.6202978 |    |            |            |            |
| H | -0.4606320 | -5.0394448 | -2.3148160 |    |            |            |            |
| H | 0.3194663  | -5.0838704 | 2.2957613  |    |            |            |            |

### int1-8-l; COSMO

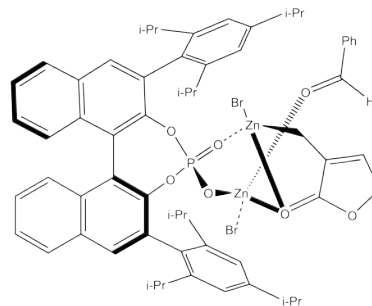

Energy(Hartree)= -11970.037664

|   |            |            |           |
|---|------------|------------|-----------|
| C | 0.2731875  | 2.4028379  | 2.2382161 |
| C | 1.6662169  | 2.5062546  | 2.2141623 |
| C | 2.2424181  | 3.8306558  | 2.2319336 |
| C | 3.6321109  | 4.0755210  | 2.0193526 |
| C | 1.3751388  | 4.9637513  | 2.4541281 |
| C | 1.9445445  | 6.2705805  | 2.5316592 |
| C | -0.0352549 | 4.7717378  | 2.5353863 |
| H | -0.6777164 | 5.6504209  | 2.6977971 |
| C | -0.6157604 | 3.5231844  | 2.3498829 |
| C | 3.0234791  | -0.9128988 | 1.0846719 |
| C | 4.1223320  | -1.0526962 | 1.9248215 |
| H | 4.7722192  | -1.9342292 | 1.8151213 |
| C | 4.4006534  | -0.1206556 | 2.9629465 |
| C | 5.4750825  | -0.3361719 | 3.8781375 |
| C | 3.5511672  | 1.0342368  | 3.1246510 |
| C | 3.7762311  | 1.8780633  | 4.2549894 |
| C | 2.4941709  | 1.2689114  | 2.1675688 |
| C | 2.2355874  | 0.2731717  | 1.2132676 |
| O | -0.2994169 | 1.1376379  | 2.2072805 |
| O | 1.2080676  | 0.4463858  | 0.2935215 |

|   |            |            |            |    |            |            |            |
|---|------------|------------|------------|----|------------|------------|------------|
| P | -0.3651764 | 0.3188872  | 0.7866809  | C  | 2.4043247  | 0.1816400  | -2.8250322 |
| O | -1.1554689 | 1.1131210  | -0.2606495 | H  | 5.1905613  | 0.3200706  | -2.8250366 |
| O | -0.7539422 | -1.1110058 | 1.1301134  | H  | 5.5045894  | -1.0867405 | -1.7544962 |
| C | 3.3057789  | 6.4696860  | 2.3530894  | C  | 2.8631976  | -1.7903148 | -1.2880960 |
| C | 4.1511375  | 5.3623686  | 2.0763868  | C  | 0.5346958  | -4.0771902 | 2.3470295  |
| H | 1.2736804  | 7.1245304  | 2.7160747  | C  | 2.1866898  | -3.2396673 | 0.5861575  |
| H | 3.7291404  | 7.4843540  | 2.4069392  | H  | 4.0376047  | -3.9986340 | 2.5236958  |
| H | 4.2968646  | 3.2282966  | 1.7999714  | H  | 3.0071628  | -5.4199985 | 2.1801294  |
| H | 5.2258533  | 5.5245857  | 1.9018535  | C  | 3.3946232  | -0.4716175 | -1.8463731 |
| C | 4.8156468  | 1.6296354  | 5.1410143  | C  | 2.6687937  | -1.9881391 | 0.1048082  |
| C | 5.6870454  | 0.5249929  | 4.9439249  | C  | 1.9346449  | -3.5040253 | 2.0717320  |
| H | 3.1056277  | 2.7300789  | 4.4304904  | H  | 1.4161470  | 0.3279129  | -2.3482845 |
| H | 4.9603400  | 2.2921929  | 6.0080540  | H  | -0.2471265 | -3.3919222 | 1.9701543  |
| H | 6.5136810  | 0.3441902  | 5.6478851  | H  | 2.2630487  | -0.4371057 | -3.7362385 |
| H | 6.1216261  | -1.2156120 | 3.7304144  | H  | -0.1843468 | -5.4444184 | -2.2196651 |
| C | -2.7059234 | 3.7566967  | 0.9529408  | H  | 0.3835202  | -5.0690213 | 1.8730042  |
| C | -2.0733565 | 3.2703133  | 2.1393787  | H  | 2.7268736  | -4.4696989 | -4.5513444 |
| C | -3.9790544 | 3.2534040  | 0.6304219  | H  | 3.5185282  | 0.2268139  | -0.9947420 |
| C | -2.7716910 | 2.3946683  | 3.0125115  | H  | 1.9902276  | -2.5296829 | 2.5974671  |
| C | -4.0470894 | 1.9304441  | 2.6432340  | H  | 2.7992483  | -2.7033305 | -3.2462498 |
| C | -4.6536871 | 2.3146733  | 1.4379907  | C  | 0.5845254  | -2.6740029 | -6.0768210 |
| H | -4.4683446 | 3.5890838  | -0.2955939 | C  | 0.0741092  | -1.8484063 | -5.0720472 |
| C | -2.1991421 | 2.0040038  | 4.3739063  | C  | -0.5649344 | -0.6334267 | -5.4238826 |
| H | -4.5660532 | 1.2297075  | 3.3116439  | C  | -0.6817688 | -0.2584337 | -6.7826007 |
| C | -2.2866339 | 0.4994253  | 4.6717989  | C  | -0.1612808 | -1.0879918 | -7.7837434 |
| H | -3.3356925 | 0.1575671  | 4.7849037  | C  | 0.4694884  | -2.2935835 | -7.4296365 |
| H | -1.7590749 | 0.2654250  | 5.6197872  | H  | 1.0772482  | -3.6222932 | -5.8155049 |
| H | -1.8331843 | -0.0997243 | 3.8596820  | H  | 0.1577645  | -2.1175506 | -4.0075242 |
| C | -2.8793006 | 2.8364881  | 5.4795070  | C  | -1.1369007 | 0.2340994  | -4.3992140 |
| H | -1.1250248 | 2.2821539  | 4.3807098  | H  | -1.1841887 | 0.6867373  | -7.0428469 |
| H | -3.9669792 | 2.6181678  | 5.5265554  | H  | -0.2473680 | -0.7990543 | -8.8417218 |
| H | -2.7627453 | 3.9242408  | 5.2960382  | H  | 0.8767795  | -2.9484651 | -8.2152726 |
| H | -2.4430687 | 2.6045797  | 6.4737157  | O  | -1.0670998 | -0.0143658 | -3.1831362 |
| C | -5.9805703 | 1.7258854  | 0.9693495  | Zn | -2.3538902 | 0.8826518  | -1.7422474 |
| C | -5.7246047 | 0.5791289  | -0.0310434 | Br | -3.7094849 | 2.2585739  | -3.0525973 |
| H | -6.6821843 | 0.1574986  | -0.4030354 | H  | -3.0520402 | -3.1099630 | -4.9239874 |
| H | -5.1521118 | -0.2385767 | 0.4541420  | Br | -3.9898883 | -2.1392706 | 2.4079316  |
| H | -5.1516885 | 0.9342274  | -0.9107387 | Zn | -2.3020035 | -2.3951930 | 0.8081480  |
| C | -6.8900384 | 1.2503800  | 2.1108000  | C  | -2.9139815 | -4.0933095 | -2.9761117 |
| H | -6.5128759 | 2.5355777  | 0.4207640  | C  | -3.5780820 | -3.1722144 | -3.9455203 |
| H | -7.8818535 | 0.9523264  | 1.7139931  | C  | -2.4986518 | -3.3897382 | -1.8799069 |
| H | -7.0475197 | 2.0426912  | 2.8708711  | C  | -1.7666818 | -3.6981065 | -0.6384724 |
| H | -6.4638627 | 0.3623133  | 2.6220583  | C  | -2.9516282 | -2.0094139 | -2.1235051 |
| C | -2.0313437 | 4.7936872  | 0.0427824  | O  | -3.5268450 | -1.8655690 | -3.3207816 |
| C | -0.9452045 | 4.1964221  | -0.8738822 | O  | -2.8614543 | -1.0648355 | -1.3105674 |
| H | -0.4118500 | 5.0076032  | -1.4116746 | H  | -4.6481826 | -3.3974235 | -4.1462302 |
| H | -1.4028691 | 3.5321195  | -1.6346260 | H  | -0.6976033 | -3.4077216 | -0.7611514 |
| H | -0.1994011 | 3.6011802  | -0.3150644 | H  | -1.7972026 | -4.7746404 | -0.3862241 |
| C | -3.0264883 | 5.6175452  | -0.7896944 | H  | -2.7720794 | -5.1650307 | -3.1700690 |
| H | -1.5162256 | 5.5108917  | 0.7134876  | H  | -1.6828783 | 1.1486880  | -4.7453268 |
| H | -2.4949848 | 6.4478822  | -1.2981326 |    |            |            |            |
| H | -3.8272201 | 6.0569368  | -0.1608647 |    |            |            |            |
| H | -3.5056709 | 5.0043352  | -1.5804729 |    |            |            |            |
| H | 2.1740560  | -6.2192408 | -2.0605876 |    |            |            |            |
| H | 4.7475067  | -1.3309473 | -3.3595423 |    |            |            |            |
| H | 2.8616784  | -4.5690648 | 3.7519041  |    |            |            |            |
| C | 1.9651426  | -5.3034751 | -2.6572412 |    |            |            |            |
| H | 2.7793242  | 1.1728602  | -3.1544493 |    |            |            |            |
| O | 0.3107087  | -6.2703550 | -3.7389173 |    |            |            |            |
| H | 0.3754740  | -4.2017171 | 3.4373776  |    |            |            |            |
| C | 2.1951431  | -4.1221255 | -1.7180936 |    |            |            |            |
| C | 4.7860692  | -0.6540987 | -2.4801367 |    |            |            |            |
| C | 0.4902682  | -5.3837415 | -3.0955843 |    |            |            |            |
| H | 0.1944158  | -4.4808860 | -3.6688400 |    |            |            |            |
| C | 2.6172010  | -2.8601476 | -2.1716971 |    |            |            |            |
| C | 3.0224689  | -4.4207112 | 2.6640312  |    |            |            |            |
| H | 3.9737057  | -5.2699788 | -3.5530209 |    |            |            |            |
| C | 1.9688212  | -4.2770057 | -0.3385791 |    |            |            |            |
| C | 2.9114451  | -5.3231266 | -3.8657710 |    |            |            |            |
| H | 2.7711204  | -6.2516073 | -4.4557785 |    |            |            |            |
| H | 1.6213053  | -5.2563005 | 0.0301388  |    |            |            |            |

### int1-8-l

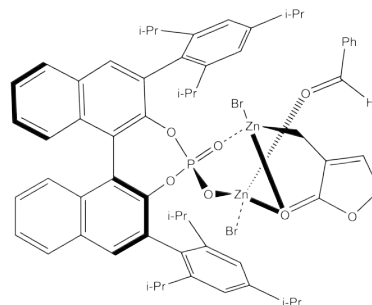

Energy(Hartree)= -11970.02331

|   |           |           |           |
|---|-----------|-----------|-----------|
| C | 0.2844969 | 2.3983961 | 2.2483203 |
| C | 1.6772476 | 2.5063723 | 2.2323377 |
| C | 2.2489568 | 3.8323826 | 2.2618732 |
| C | 3.6387666 | 4.0835084 | 2.0599150 |
| C | 1.3764005 | 4.9607827 | 2.4862053 |
| C | 1.9414348 | 6.2681192 | 2.5768451 |

|   |            |            |            |    |            |            |            |
|---|------------|------------|------------|----|------------|------------|------------|
| C | -0.0335922 | 4.7632183  | 2.5560052  | H  | 2.8209810  | 1.1812898  | -3.1463306 |
| H | -0.6809545 | 5.6380330  | 2.7198013  | H  | 0.3144794  | -6.2549118 | -3.7313249 |
| C | -0.6098699 | 3.5147355  | 2.3581568  | H  | 0.3663451  | -4.1760987 | 3.4357788  |
| C | 3.0420641  | -0.9062665 | 1.0925004  | C  | 2.2073106  | -4.1108567 | -1.7124274 |
| C | 4.1387409  | -1.0487785 | 1.9345191  | C  | 4.8211814  | -0.6522235 | -2.4558177 |
| H | 4.7876351  | -1.9308915 | 1.8232602  | C  | 0.4980253  | -5.3685836 | -3.0883182 |
| C | 4.4142566  | -0.1202407 | 2.9761145  | H  | 0.2029593  | -4.4643484 | -3.6597142 |
| C | 5.4862747  | -0.3372693 | 3.8929739  | C  | 2.6374122  | -2.8515434 | -2.1651386 |
| C | 3.5625975  | 1.0325506  | 3.1402382  | C  | 3.0164562  | -4.4125108 | 2.6725065  |
| C | 3.7832135  | 1.8713207  | 4.2748786  | H  | 3.9815518  | -5.2657454 | -3.5470724 |
| C | 2.5082067  | 1.2711532  | 2.1812781  | C  | 1.9751828  | -4.2640822 | -0.3341851 |
| C | 2.2539701  | 0.2795531  | 1.2213726  | C  | 2.9193588  | -5.3152465 | -3.8598275 |
| O | -0.2826542 | 1.1310809  | 2.2078845  | H  | 2.7763275  | -6.2424413 | -4.4513015 |
| O | 1.2322821  | 0.4541785  | 0.2963130  | H  | 1.6210279  | -5.2411896 | 0.0340300  |
| P | -0.3450602 | 0.3289486  | 0.7793551  | C  | 2.4441732  | 0.1883268  | -2.8247400 |
| O | -1.1203177 | 1.1419419  | -0.2651973 | H  | 5.2310018  | 0.3198381  | -2.8001516 |
| O | -0.7427173 | -1.1038782 | 1.0975965  | H  | 5.5316034  | -1.0836789 | -1.7218776 |
| C | 3.3026210  | 6.4731546  | 2.4092398  | C  | 2.8855962  | -1.7829287 | -1.2808187 |
| C | 4.1530352  | 5.3711440  | 2.1302314  | C  | 0.5316018  | -4.0541166 | 2.3462335  |
| H | 1.2664776  | 7.1185058  | 2.7627037  | C  | 2.1955934  | -3.2282118 | 0.5911230  |
| H | 3.7219678  | 7.4888191  | 2.4735247  | H  | 4.0342940  | -3.9958640 | 2.5366683  |
| H | 4.3069591  | 3.2394837  | 1.8391605  | H  | 2.9991162  | -5.4117593 | 2.1887520  |
| H | 5.2283648  | 5.5378795  | 1.9643241  | C  | 3.4239890  | -0.4660860 | -1.8364266 |
| C | 4.8208238  | 1.6211577  | 5.1617602  | C  | 2.6863873  | -1.9797794 | 0.1112079  |
| C | 5.6944071  | 0.5194472  | 4.9623318  | C  | 1.9361241  | -3.4901925 | 2.0757701  |
| H | 3.1101916  | 2.7210371  | 4.4513571  | H  | 1.4501506  | 0.3324511  | -2.3595449 |
| H | 4.9619708  | 2.2803755  | 6.0318350  | H  | -0.2443256 | -3.3639384 | 1.9666410  |
| H | 6.5195610  | 0.3368735  | 5.6674889  | H  | 2.3156452  | -0.4268415 | -3.7405293 |
| H | 6.1341607  | -1.2154146 | 3.7434450  | H  | -0.1751989 | -5.4264925 | -2.2112228 |
| C | -2.6885891 | 3.7502009  | 0.9440906  | H  | 0.3753573  | -5.0460541 | 1.8739014  |
| C | -2.0642665 | 3.2573902  | 2.1321065  | H  | 2.7393817  | -4.4597570 | -4.5442718 |
| C | -3.9548635 | 3.2406949  | 0.6044107  | H  | 3.5402764  | 0.2330840  | -0.9844867 |
| C | -2.7650862 | 2.3695507  | 2.9907676  | H  | 1.9957299  | -2.5158121 | 2.6008878  |
| C | -4.0326885 | 1.8988024  | 2.6043086  | H  | 2.8264139  | -2.6956929 | -3.2387411 |
| C | -4.6309881 | 2.2905995  | 1.3975435  | C  | 0.5487017  | -2.6875218 | -6.0505202 |
| H | -4.4405392 | 3.5859463  | -0.3199716 | C  | 0.0703898  | -1.8314666 | -5.0545725 |
| C | -2.2057143 | 1.9771431  | 4.3571207  | C  | -0.6537029 | -0.6708271 | -5.4209749 |
| H | -4.5530964 | 1.1886741  | 3.2613489  | C  | -0.8899154 | -0.3819284 | -6.7844638 |
| C | -2.2884677 | 0.4719977  | 4.6520092  | C  | -0.4040669 | -1.2420157 | -7.7771274 |
| H | -3.3359838 | 0.1215929  | 4.7501254  | C  | 0.3140320  | -2.3927679 | -7.4084034 |
| H | -1.7724889 | 0.2397257  | 5.6065786  | H  | 1.1091589  | -3.5930223 | -5.7744645 |
| H | -1.8192819 | -0.1243553 | 3.8471039  | H  | 0.2443641  | -2.0368582 | -3.9866620 |
| C | -2.9033624 | 2.8048179  | 5.4554280  | C  | -1.1951226 | 0.2284851  | -4.4018627 |
| H | -1.1332813 | 2.8615256  | 4.3772280  | H  | -1.4585123 | 0.5221505  | -7.0551044 |
| H | -3.9902840 | 2.5812944  | 5.4887564  | H  | -0.5839755 | -1.0190336 | -8.8393424 |
| H | -2.7908659 | 3.8932704  | 5.2746158  | H  | 0.6962280  | -3.0710192 | -8.1869058 |
| H | -2.4784251 | 2.5736680  | 6.4546178  | O  | -1.0316433 | 0.0522638  | -3.1850754 |
| C | -5.9553670 | 1.7053083  | 0.9172796  | Zn | -2.3446841 | 0.9655161  | -1.7260528 |
| C | -5.6983521 | 0.5658430  | -0.0908362 | Br | -3.6794430 | 2.3100944  | -3.0780125 |
| H | -6.6556543 | 0.1485765  | -0.4681503 | H  | -3.0311963 | -3.0704219 | -4.9436658 |
| H | -5.1312804 | -0.2575094 | 0.3910964  | Br | -4.0046437 | -2.1386885 | 2.3875579  |
| H | -5.1257061 | 0.9271632  | -0.9682369 | Zn | -2.3138387 | -2.3773220 | 0.8124470  |
| C | -6.8698815 | 1.2218011  | 2.0513107  | C  | -2.9034622 | -4.0445297 | -2.9892845 |
| H | -6.4839631 | 2.5203097  | 0.3729799  | C  | -3.5584628 | -3.1203785 | -3.9644027 |
| H | -7.8613207 | 0.9304839  | 1.6487537  | C  | -2.4753600 | -3.3387428 | -1.8989532 |
| H | -7.0274534 | 2.0076059  | 2.8178629  | C  | -1.7474065 | -3.6465643 | -0.6596573 |
| H | -6.4485260 | 0.3271167  | 2.5546252  | C  | -2.9179668 | -1.9530549 | -2.1479759 |
| C | -2.0145354 | 4.8030542  | 0.0517462  | O  | -3.4915214 | -1.8121254 | -3.3505070 |
| C | -0.9177339 | 4.2266522  | -0.8655265 | O  | -2.8240189 | -1.0085828 | -1.3419166 |
| H | -0.3823950 | 5.0489215  | -1.3839389 | H  | -4.6322173 | -3.3321635 | -4.1640992 |
| H | -1.3661154 | 3.5773114  | -1.6449019 | H  | -0.6874505 | -3.3185881 | -0.7637379 |
| H | -0.1741196 | 3.6243373  | -0.3115064 | H  | -1.7518688 | -4.7263699 | -0.4210746 |
| C | -3.0098585 | 5.6318488  | -0.7755347 | H  | -2.7703609 | -5.1186814 | -3.1751828 |
| H | -1.5083339 | 5.5141752  | 0.7355216  | H  | -1.8106241 | 1.0970508  | -4.7540684 |
| H | -2.4814156 | 6.4735410  | -1.2681907 |    |            |            |            |
| H | -3.8179837 | 6.0556693  | -0.1457504 |    |            |            |            |
| H | -3.4785647 | 5.0275627  | -1.5791497 |    |            |            |            |
| H | 2.1811998  | -6.2080221 | -2.0548489 |    |            |            |            |
| H | 4.7910073  | -1.3322650 | -3.3330645 |    |            |            |            |
| H | 2.8506927  | -4.5602196 | 3.7595876  |    |            |            |            |
| C | 1.9734321  | -5.2917262 | -2.6512818 |    |            |            |            |

## 7.2.4 Pathways starting from 14d-ma

### 7.2.4.1 to 15r-ma and 15r-2-ma

#### TS1-8-r-transmetall; COSMO

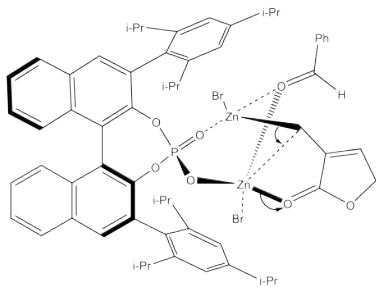

Energy(Hartree)= -11970.02104447

|   |            |            |            |
|---|------------|------------|------------|
| C | 1.4534042  | 2.2765813  | 1.5340203  |
| C | 2.8545200  | 2.2853816  | 1.5775150  |
| C | 3.5110087  | 3.5677759  | 1.6761627  |
| C | 4.9242007  | 3.7270574  | 1.5499223  |
| C | 2.7076629  | 4.7512981  | 1.8756963  |
| C | 3.3528706  | 6.0166683  | 2.0207143  |
| C | 1.2865530  | 4.6526872  | 1.8609238  |
| H | 0.6912785  | 5.5696512  | 1.9852780  |
| C | 0.6374593  | 3.4462303  | 1.6262804  |
| C | 3.9007737  | -1.1963390 | 0.3088496  |
| C | 4.9785417  | -1.4834042 | 1.1370272  |
| H | 5.5196109  | -2.4339309 | 1.0131379  |
| C | 5.3542147  | -0.6164806 | 2.2052604  |
| C | 6.3976641  | -0.9804068 | 3.1091018  |
| C | 4.6199491  | 0.6072136  | 2.4332963  |
| C | 4.9118811  | 1.3579059  | 3.6114243  |
| C | 3.6070270  | 1.0002329  | 1.4805750  |
| C | 3.2923741  | 0.0919792  | 0.4654520  |
| O | 0.7824214  | 1.0612131  | 1.4173412  |
| O | 2.3266801  | 0.4478222  | -0.4754266 |
| P | 0.7540529  | 0.3364596  | -0.0567748 |
| O | -0.0335929 | 1.1255369  | -1.1090360 |
| O | 0.3050088  | -1.1082425 | 0.2041172  |
| C | 4.7319693  | 6.1294567  | 1.9304504  |
| C | 5.5192158  | 4.9751284  | 1.6741205  |
| H | 2.7276128  | 6.9083140  | 2.1854779  |
| H | 5.2158954  | 7.1123442  | 2.0361574  |
| H | 5.5455048  | 2.8453428  | 1.3415656  |
| H | 6.6105280  | 5.0703953  | 1.5663960  |
| C | 5.9175447  | 0.9631440  | 4.4839525  |
| C | 6.6826900  | -0.2044703 | 4.2229370  |
| H | 4.3235164  | 2.2592542  | 3.8309725  |
| H | 6.1184561  | 1.5585406  | 5.3876764  |
| H | 7.4846599  | -0.5025257 | 4.9153885  |
| H | 6.9590468  | -1.9078717 | 2.9149107  |
| C | -1.3778172 | 3.8683966  | 0.1650869  |
| C | -0.8400228 | 3.3543318  | 1.3847434  |
| C | -2.7591821 | 3.7450129  | -0.0651858 |
| C | -1.6979171 | 2.7184582  | 2.3211018  |
| C | -3.0795902 | 2.6457760  | 2.0495771  |
| C | -3.6353962 | 3.1487312  | 0.8624738  |
| H | -3.1756641 | 4.1203879  | -1.0135598 |
| C | -1.1767643 | 2.1147607  | 3.6241126  |
| H | -3.7335429 | 2.1596227  | 2.7886178  |
| C | -1.4745873 | 0.6061653  | 3.7175072  |
| H | -2.5659700 | 0.4021859  | 3.7304067  |
| H | -1.0496844 | 0.1805633  | 4.6497275  |
| H | -1.0257633 | 0.0557883  | 2.8675429  |
| C | -1.7221742 | 2.8752490  | 4.8470461  |
| H | -0.0742304 | 2.2333226  | 3.6349548  |
| H | -2.8269094 | 2.7915785  | 4.9180690  |
| H | -1.4703235 | 3.9538549  | 4.7937378  |
| H | -1.2943036 | 2.4674778  | 5.7861673  |
| C | -5.1257948 | 3.0831343  | 0.5394129  |
| C | -5.9078552 | 2.0559086  | 1.3674005  |
| H | -6.9531051 | 1.9863572  | 1.0038624  |

|    |            |            |            |
|----|------------|------------|------------|
| H  | -5.9537004 | 2.3421259  | 2.4391859  |
| H  | -5.4590451 | 1.0442182  | 1.3042772  |
| C  | -5.7634602 | 4.4817832  | 0.6628184  |
| H  | -5.1953718 | 2.7772681  | -0.5294490 |
| H  | -6.8295580 | 4.4601008  | 0.3558600  |
| H  | -5.2400553 | 5.2258170  | 0.0297090  |
| H  | -5.7147667 | 4.8402560  | 1.7125919  |
| C  | -0.5121786 | 4.5599391  | -0.8895581 |
| C  | -0.8222683 | 4.1141244  | -2.3279264 |
| H  | -0.1081919 | 4.5867075  | -3.0330010 |
| H  | -1.8404640 | 4.4128211  | -2.6523749 |
| H  | -0.7305484 | 3.0186189  | -2.4444982 |
| C  | -0.6365125 | 6.0922504  | -0.7666689 |
| H  | 0.5430462  | 4.2865832  | -0.6862499 |
| H  | 0.0322540  | 6.6000249  | -1.4921327 |
| H  | -0.3761797 | 6.4528411  | 0.2481682  |
| H  | -1.6768814 | 6.4183226  | -0.9773051 |
| H  | -0.4571266 | -4.6185280 | -2.3822958 |
| H  | 4.7715843  | -2.1409170 | -4.2261123 |
| H  | 2.5454295  | -5.3377977 | 2.8291382  |
| C  | 0.4580458  | -4.5407694 | -3.0128343 |
| H  | 3.7017300  | 0.9167325  | -3.9673093 |
| H  | -0.8042943 | -4.4334168 | -4.7927682 |
| H  | 2.0356848  | -2.9577411 | 3.4676920  |
| C  | 1.4553689  | -3.7209638 | -2.1995544 |
| C  | 5.1234279  | -1.4615638 | -3.4213247 |
| C  | 0.0526539  | -3.8914266 | -4.3426432 |
| H  | 0.8813118  | -3.9260058 | -5.0805660 |
| C  | 2.2351900  | -2.7018537 | -2.7634842 |
| C  | 2.2692403  | -5.0921711 | 1.7836331  |
| H  | 1.2188573  | -6.4762474 | -2.2805516 |
| C  | 1.6286434  | -3.9993843 | -0.8292549 |
| C  | 0.9754695  | -5.9749590 | -3.2387063 |
| H  | 0.2193965  | -6.5923094 | -3.7672134 |
| H  | 1.0257669  | -4.8030311 | -0.3799334 |
| C  | 3.0942904  | 0.0631355  | -3.6025016 |
| H  | 5.7553115  | -0.6787156 | -3.8904281 |
| H  | 5.7615075  | -2.0555425 | -2.7357718 |
| C  | 3.1096942  | -1.9185496 | -1.9861709 |
| C  | 1.8407895  | -2.6917645 | 2.4080346  |
| C  | 2.5061812  | -3.2702355 | -0.0093876 |
| H  | 2.7946381  | -5.8028292 | 1.1136795  |
| H  | 1.1777841  | -5.2705387 | 1.6892218  |
| C  | 3.9328068  | -0.8309099 | -2.6725335 |
| C  | 3.2245048  | -2.1792232 | -0.5957929 |
| C  | 2.6347690  | -3.6307090 | 1.4775506  |
| H  | 2.2043801  | 0.4695595  | -3.0834849 |
| H  | 2.1132074  | -1.6287155 | 2.2700246  |
| H  | 2.7392241  | -0.4883883 | -4.4978442 |
| H  | -0.2345541 | -2.8283628 | -4.2173711 |
| H  | 0.7530226  | -2.7828394 | 2.2202780  |
| H  | 1.8989816  | -5.9615443 | -3.8547609 |
| H  | 4.3590314  | -0.1808304 | -1.8811647 |
| H  | 3.7063826  | -3.5132992 | 1.7396419  |
| H  | 2.1477549  | -2.4810399 | -3.8365210 |
| Zn | -1.6715422 | 0.2943732  | -1.9151553 |
| Br | -1.5836556 | 0.5656252  | -4.2237490 |
| C  | -5.2470299 | -5.9083898 | -2.5990249 |
| C  | -2.7238872 | -2.4960626 | -2.8825860 |
| C  | -4.1875272 | -5.7634931 | -1.6805434 |
| C  | -4.6202721 | -3.8321345 | -3.6875826 |
| C  | -3.5539725 | -3.6807062 | -2.7649055 |
| C  | -5.4667084 | -4.9430075 | -3.5990367 |
| C  | -3.3408891 | -4.6557363 | -1.7581139 |
| O  | -1.8273577 | -2.1429039 | -2.0800527 |
| H  | -5.9102943 | -6.7847018 | -2.5326461 |
| H  | -4.7822310 | -3.0633261 | -4.4593386 |
| H  | -4.0264676 | -6.5196788 | -0.8978118 |
| H  | -6.2986368 | -5.0611683 | -4.3090001 |
| H  | -2.5273106 | -4.5213020 | -1.0301402 |
| Br | -2.0768166 | -3.5400744 | 1.4638469  |

|    |            |            |            |
|----|------------|------------|------------|
| Zn | -1.5001808 | -1.8189080 | -0.0070037 |
| H  | -6.2017958 | -2.8986531 | -1.3187488 |
| H  | -2.6742038 | -0.1619893 | 0.9620474  |
| C  | -4.9725477 | -1.6943794 | 0.0229728  |
| C  | -6.1639771 | -1.8829165 | -0.8615937 |
| H  | -4.7660746 | -2.3100822 | 0.9092711  |
| C  | -4.2023295 | -0.6940058 | -0.4822681 |
| C  | -2.8935515 | -0.1176293 | -0.1280672 |
| C  | -4.8838365 | -0.1952756 | -1.7067265 |
| O  | -6.0283721 | -0.9148794 | -1.9140678 |
| O  | -4.5110954 | 0.7011613  | -2.4461614 |
| H  | -7.1329051 | -1.7128170 | -0.3411530 |
| H  | -2.9166965 | 0.9904876  | -0.2810169 |
| H  | -2.9015902 | -1.8282861 | -3.7621696 |

### TS1-8-r-transmetall

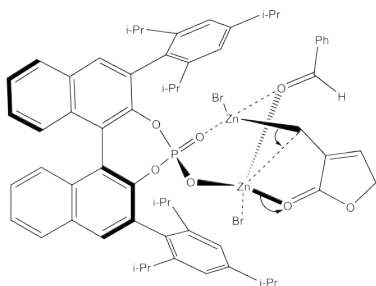

Energy(Hartree)= -11970.00805767  
number of imaginary frequencies: 1

|   |            |            |            |
|---|------------|------------|------------|
| C | 1.4548147  | 2.2727555  | 1.5255282  |
| C | 2.8558800  | 2.2862984  | 1.5718230  |
| C | 3.5079115  | 3.5707502  | 1.6701858  |
| C | 4.9206950  | 3.7337994  | 1.5472933  |
| C | 2.7008647  | 4.7520744  | 1.8661803  |
| C | 3.3425016  | 6.0188349  | 2.0105742  |
| C | 1.2804087  | 4.6485028  | 1.8495975  |
| H | 0.6813259  | 5.5632261  | 1.9720542  |
| C | 0.6351371  | 3.4400193  | 1.6161302  |
| C | 3.9105958  | -1.1959824 | 0.3130598  |
| C | 4.9856270  | -1.4800140 | 1.1454157  |
| H | 5.5264903  | -2.4311590 | 1.0252171  |
| C | 5.3584801  | -0.6104107 | 2.2122095  |
| C | 6.3995931  | -0.9703332 | 3.1196243  |
| C | 4.6229965  | 0.6133631  | 2.4350466  |
| C | 4.9119385  | 1.3674945  | 3.6114097  |
| C | 3.6123434  | 1.0032411  | 1.4787923  |
| C | 3.3017830  | 0.0928348  | 0.4644122  |
| O | 0.7878608  | 1.0558623  | 1.4073682  |
| O | 2.3397864  | 0.4459046  | -0.4801114 |
| P | 0.7659898  | 0.3324489  | -0.0684561 |
| O | -0.0189261 | 1.1232415  | -1.1210126 |
| O | 0.3185048  | -1.1133100 | 0.1896869  |
| C | 4.7209800  | 6.1354959  | 1.9235495  |
| C | 5.5117150  | 4.9833389  | 1.6711132  |
| H | 2.7143185  | 6.9089906  | 2.1722183  |
| H | 5.2017260  | 7.1199469  | 2.0287552  |
| H | 5.5441978  | 2.8529730  | 1.3421852  |
| H | 6.6029855  | 5.0813487  | 1.5659903  |
| C | 5.9157071  | 0.9761498  | 4.4870139  |
| C | 6.6817996  | -0.1913268 | 4.2314065  |
| H | 4.3224031  | 2.2691156  | 3.8262077  |
| H | 6.1142791  | 1.5745532  | 5.3892049  |
| H | 7.4824011  | -0.4869850 | 4.9263870  |
| H | 6.9619799  | -1.8980444 | 2.9295559  |
| C | -1.3862560 | 3.8544985  | 0.1602643  |
| C | -0.8425544 | 3.3431201  | 1.3782613  |

|   |            |            |            |
|---|------------|------------|------------|
| C | -2.7679678 | 3.7266816  | -0.0643784 |
| C | -1.6949719 | 2.7058303  | 2.3184775  |
| C | -3.0772334 | 2.6292338  | 2.0523339  |
| C | -3.6388871 | 3.1293475  | 0.8671080  |
| H | -3.1886488 | 4.0983252  | -1.0123169 |
| C | -1.1671262 | 2.1053208  | 3.6203286  |
| H | -3.7269223 | 2.1424481  | 2.7946729  |
| C | -1.4590431 | 0.5958847  | 3.7171086  |
| H | -2.5495131 | 0.3874582  | 3.7347602  |
| H | -1.0291098 | 0.1725656  | 4.6479437  |
| H | -1.0116254 | 0.0454847  | 2.8666053  |
| C | -1.7096035 | 2.8663390  | 4.8441234  |
| H | -0.0649793 | 2.2274256  | 3.6265394  |
| H | -2.8137411 | 2.7801022  | 4.9201100  |
| H | -1.4615593 | 3.9454959  | 4.7877756  |
| H | -1.2770752 | 2.4618128  | 5.7824811  |
| C | -5.1301561 | 3.0593646  | 0.5491796  |
| C | -5.9065898 | 2.0308373  | 1.3807916  |
| H | -6.9531475 | 1.9581829  | 1.0215244  |
| H | -5.9498780 | 2.3180885  | 2.4524049  |
| H | -5.4552515 | 1.0203500  | 1.3169533  |
| C | -5.7714383 | 4.4561524  | 0.6739035  |
| H | -5.2025890 | 2.7520915  | -0.5191305 |
| H | -6.8385693 | 4.4321320  | 0.3707132  |
| H | -5.2520782 | 5.2013024  | 0.0390942  |
| H | -5.7197151 | 4.8158364  | 1.7229692  |
| C | -0.5271232 | 4.5490242  | -0.8977010 |
| C | -0.8400672 | 4.1029068  | -2.3353342 |
| H | -0.1303769 | 4.5782748  | -3.0425961 |
| H | -1.8602039 | 4.3970901  | -2.6574827 |
| H | -0.7434100 | 3.0083766  | -2.4548940 |
| C | -0.6577544 | 6.0807215  | -0.7738810 |
| H | 0.5298579  | 4.2799081  | -0.6979867 |
| H | 0.0061503  | 6.5918621  | -1.5013028 |
| H | -0.3960229 | 6.4426353  | 0.2400745  |
| H | -1.7000885 | 6.4025998  | -0.9806532 |
| H | -0.4552510 | -4.6068766 | -2.3716524 |
| H | 4.7870284  | -2.1602003 | -4.2166362 |
| H | 2.5363109  | -5.3266345 | 2.8434843  |
| C | 0.4606400  | -4.5357952 | -3.0023606 |
| H | 3.7313443  | 0.9042040  | -3.9686160 |
| H | -0.8008335 | -4.4265536 | -4.7832405 |
| H | 2.0327798  | -2.9433784 | 3.4738564  |
| C | 1.4621025  | -3.7190422 | -2.1909070 |
| C | 5.1406502  | -1.4799524 | -3.4135646 |
| C | 0.0585648  | -3.8875411 | -4.3338361 |
| H | 0.8868249  | -3.9291490 | -5.0717204 |
| C | 2.2464151  | -2.7048995 | -2.7568721 |
| C | 2.2642953  | -5.0830056 | 1.7964946  |
| H | 1.2124866  | -6.4729042 | -2.2656656 |
| C | 1.6330110  | -3.9950659 | -0.8201607 |
| C | 0.9707963  | -5.9729905 | -3.2248092 |
| H | 0.2124156  | -6.5886068 | -3.7521854 |
| H | 1.0260620  | -4.7946106 | -0.3690935 |
| C | 3.1193421  | 0.0545548  | -3.6026011 |
| H | 5.7772715  | -0.7020151 | -3.8843265 |
| H | 5.7744090  | -2.0753580 | -2.7254884 |
| C | 3.1231745  | -1.9234149 | -1.9808208 |
| C | 1.8417468  | -2.6799091 | 2.4130414  |
| C | 2.5122615  | -3.2675042 | -0.0011604 |
| H | 2.7891236  | -5.7974180 | 1.1301713  |
| H | 1.1724835  | -5.2574801 | 1.7003435  |
| C | 3.9518449  | -0.8411779 | -2.6689438 |
| C | 3.2350434  | -2.1808905 | -0.5897635 |
| C | 2.6355449  | -3.6237223 | 1.4872102  |
| H | 2.2308367  | 0.4678081  | -3.0870768 |
| H | 2.1178685  | -1.6180570 | 2.2739019  |
| H | 2.7628770  | -0.4967508 | -4.4974109 |
| H | -0.2224368 | -2.8224071 | -4.2126870 |
| H | 0.7541902  | -2.7689543 | 2.2235117  |
| H | 1.8946396  | -5.9654458 | -3.8401302 |

|    |            |            |            |
|----|------------|------------|------------|
| H  | 4.3797543  | -0.1911111 | -1.8783671 |
| H  | 3.7068398  | -3.5088117 | 1.7520919  |
| H  | 2.1603447  | -2.4856134 | -3.8302751 |
| Zn | -1.6557044 | 0.2958687  | -1.9324000 |
| Br | -1.5705943 | 0.5497112  | -4.2392285 |
| C  | -5.3003806 | -5.8552422 | -2.6160674 |
| C  | -2.7256868 | -2.4777610 | -2.8967224 |
| C  | -4.2374452 | -5.7272145 | -1.6999415 |
| C  | -4.6464034 | -3.7845644 | -3.6989165 |
| C  | -3.5757682 | -3.6512745 | -2.7796491 |
| C  | -5.5083920 | -4.8837244 | -3.6121865 |
| C  | -3.3747429 | -4.6313912 | -1.7762269 |
| O  | -1.8240562 | -2.1429545 | -2.0949746 |
| H  | -5.9755533 | -6.7226557 | -2.5512338 |
| H  | -4.8005067 | -3.0089951 | -4.4655221 |
| H  | -4.0851175 | -6.4864942 | -0.9183889 |
| H  | -6.3436708 | -4.9876285 | -4.3205741 |
| H  | -2.5590379 | -4.5089987 | -1.0479231 |
| Br | -2.0646611 | -3.5607686 | 1.4308103  |
| Zn | -1.4857344 | -1.8256102 | -0.0198079 |
| H  | -6.1864723 | -2.9023041 | -1.3080308 |
| H  | -2.6494534 | -0.1627003 | 0.9577354  |
| C  | -4.9508140 | -1.6982697 | 0.0291127  |
| C  | -6.1464553 | -1.8858620 | -0.8517145 |
| H  | -4.7361449 | -2.3156881 | 0.9124819  |
| C  | -4.1837871 | -0.6972950 | -0.4791914 |
| C  | -2.8744422 | -0.1222949 | -0.1312137 |
| C  | -4.8706049 | -0.1974311 | -1.7024305 |
| O  | -6.0173223 | -0.9201009 | -1.9040905 |
| O  | -4.5009813 | 0.6977867  | -2.4411874 |
| H  | -7.1133315 | -1.7152127 | -0.3262340 |
| H  | -2.8941373 | 0.9843739  | -0.2937222 |
| H  | -2.8931697 | -1.8024801 | -3.7735613 |

|   |            |            |            |
|---|------------|------------|------------|
| O | -0.4093700 | 0.6562435  | -0.8964763 |
| O | 0.0597639  | -1.3355684 | 0.7428329  |
| C | 4.5744569  | 6.0175100  | 1.7018275  |
| C | 5.3270335  | 4.8297821  | 1.5017264  |
| H | 2.5906973  | 6.8598720  | 1.9173393  |
| H | 5.0849527  | 6.9914564  | 1.7493287  |
| H | 5.3007762  | 2.6897357  | 1.2861158  |
| H | 6.4188793  | 4.8889085  | 1.3751890  |
| C | 5.7520597  | 1.0641992  | 4.4627125  |
| C | 6.6302769  | -0.0052606 | 4.1416084  |
| H | 4.0053600  | 2.1973327  | 3.8938563  |
| H | 5.9194878  | 1.6538520  | 5.3769355  |
| H | 7.4833976  | -0.2313693 | 4.7992993  |
| H | 7.0536516  | -1.6255762 | 2.7682844  |
| C | -1.4526956 | 3.6988129  | -0.1296812 |
| C | -1.0463993 | 3.4120399  | 1.2091531  |
| C | -2.8264931 | 3.6989028  | -0.4239721 |
| C | -2.0141514 | 3.1410465  | 2.2046777  |
| C | -3.3808869 | 3.1951379  | 1.8634182  |
| C | -3.8124080 | 3.4628821  | 0.5561787  |
| H | -3.1475694 | 3.8896889  | -1.4593697 |
| C | -1.6090089 | 2.7654026  | 3.6272468  |
| H | -4.1233529 | 2.9840134  | 2.6466577  |
| C | -1.9735820 | 1.3011378  | 3.9393022  |
| H | -3.0711111 | 1.1403911  | 3.8929719  |
| H | -1.6322199 | 1.0193841  | 4.9570079  |
| H | -1.4960743 | 0.6189363  | 3.2094253  |
| C | -2.1951112 | 3.7321492  | 4.6707214  |
| H | -0.5035705 | 2.8488735  | 3.6900734  |
| H | -3.3044609 | 3.6930404  | 4.6871553  |
| H | -1.8992811 | 4.7798080  | 4.4590289  |
| H | -1.8390095 | 3.4729508  | 5.6892370  |
| C | -5.2823038 | 3.4858807  | 0.1459096  |
| C | -6.2469913 | 2.9710610  | 1.2197702  |
| H | -7.2821631 | 2.9439761  | 0.8230303  |
| H | -6.2549726 | 3.6308848  | 2.1130846  |
| H | -5.9873526 | 1.9461790  | 1.5494577  |
| C | -5.7011506 | 4.8935621  | -0.3236581 |
| H | -5.3570490 | 2.8002302  | -0.7295273 |
| H | -6.7454706 | 4.8910276  | -0.6990464 |
| H | -5.0499482 | 5.2687973  | -1.1380506 |
| H | -5.6407389 | 5.6185617  | 0.5153697  |
| C | -0.4413096 | 4.0732269  | -1.2170148 |
| C | -0.7356428 | 3.4655275  | -2.5969830 |
| H | 0.0786860  | 3.7260479  | -3.3037264 |
| H | -1.6818898 | 3.8461271  | -3.0329449 |
| H | -0.8019187 | 2.3632480  | -2.5522692 |
| C | -0.3336211 | 5.6077958  | -1.3341118 |
| H | 0.5490625  | 3.6872864  | -0.8981795 |
| H | 0.4376923  | 5.8921575  | -2.0796950 |
| H | -0.0660601 | 6.0816562  | -0.3698090 |
| H | -1.3022799 | 6.0405536  | -1.6616331 |
| H | 0.2897966  | -5.2784546 | -2.6747825 |
| H | 4.6920152  | -1.4516170 | -4.3544559 |
| C | 3.4073948  | -5.7712917 | 2.2911866  |
| H | 0.8701685  | -4.6132971 | -3.3529095 |
| H | 3.2157076  | 1.3482204  | -3.7077194 |
| H | -0.8745572 | -4.3955734 | -4.6614861 |
| H | 2.5405446  | -3.5990843 | 3.2432534  |
| C | 1.7752825  | -3.7752323 | -2.4585148 |
| C | 4.9752949  | -0.8320177 | -3.4775999 |
| C | -0.1335425 | -3.7551532 | -4.1413683 |
| H | 0.3728946  | -3.1408972 | -4.9145358 |
| C | 2.3514336  | -2.5775857 | -2.9116470 |
| C | 3.0394012  | -5.4598518 | 1.2923716  |
| H | 2.3812068  | -6.1702302 | -3.7190946 |
| C | 2.0709665  | -4.1965702 | -1.1493528 |
| C | 1.6934478  | -5.5155172 | -4.2914043 |
| H | 1.0322175  | -6.1614264 | -4.9062970 |
| H | 1.6457773  | -5.1480886 | -0.8011148 |
| C | 2.7429037  | 0.3873512  | -3.4173191 |

### TS1-8r-2; COSMO

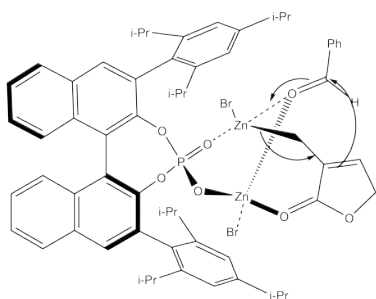

Energy(Hartree)= -11970.01990214

|   |           |            |            |
|---|-----------|------------|------------|
| C | 1.1879428 | 2.2239247  | 1.5545096  |
| C | 2.5882446 | 2.2040278  | 1.6028888  |
| C | 3.2837288 | 3.4740614  | 1.6068165  |
| C | 4.6992033 | 3.5923410  | 1.4548939  |
| C | 2.5173792 | 4.6899733  | 1.7333964  |
| C | 3.1938225 | 5.9452409  | 1.8043833  |
| C | 1.0966066 | 4.6269502  | 1.6983489  |
| H | 0.5221968 | 5.5646433  | 1.7425408  |
| C | 0.4175531 | 3.4271419  | 1.5264412  |
| C | 3.8431021 | -1.1776647 | 0.2829077  |
| C | 4.9923313 | -1.3501543 | 1.0444196  |
| H | 5.6679156 | -2.1907418 | 0.8254320  |
| C | 5.2873728 | -0.5061206 | 2.1547235  |
| C | 6.3968779 | -0.7756881 | 3.0118114  |
| C | 4.4275981 | 0.6151185  | 2.4499914  |
| C | 4.6800125 | 1.3692071  | 3.6345521  |
| C | 3.3416738 | 0.9213194  | 1.5476365  |
| C | 3.0479681 | -0.0167553 | 0.5535306  |
| O | 0.4794432 | 1.0185653  | 1.5799871  |
| O | 1.9676733 | 0.2054369  | -0.2976073 |
| P | 0.4354657 | 0.0620207  | 0.2479148  |

|    |            |            |            |
|----|------------|------------|------------|
| H  | 5.4693268  | 0.0870179  | -3.8563739 |
| H  | 5.7188258  | -1.4058800 | -2.8878762 |
| C  | 3.1143376  | -1.7563954 | -2.0643750 |
| C  | 2.2364844  | -3.2592188 | 2.2314883  |
| C  | 2.8400109  | -3.4236712 | -0.2598194 |
| H  | 3.6538424  | -5.9739333 | 0.5254291  |
| H  | 1.9954710  | -5.8234615 | 1.2012707  |
| C  | 3.7379984  | -0.4804253 | -2.6278272 |
| C  | 3.3158913  | -2.1566723 | -0.7147367 |
| C  | 3.1204100  | -3.9308725 | 1.1615682  |
| H  | 1.8429829  | 0.6143741  | -2.8132828 |
| H  | 2.3096083  | -2.1556652 | 2.2064793  |
| H  | 2.4150348  | -0.1095121 | -4.3543098 |
| H  | -0.6890295 | -3.0651241 | -3.4741836 |
| H  | 1.1730117  | -3.5273255 | 2.0805213  |
| H  | 2.3095804  | -4.9029743 | -4.9830246 |
| H  | 4.0996509  | 0.1268084  | -1.7725744 |
| H  | 4.1690674  | -3.6530516 | -1.3925587 |
| H  | 2.1809410  | -2.2541095 | -3.9496841 |
| Zn | -2.2763275 | 0.3449280  | -1.2213316 |
| Br | -3.7198709 | 0.9698658  | -2.9228196 |
| C  | -4.3323314 | -6.1167232 | -3.3730682 |
| C  | -3.6080427 | -2.3100875 | -1.5190538 |
| C  | -3.0846968 | -5.8636377 | -2.7796394 |
| C  | -5.0835075 | -3.8947557 | -2.7355603 |
| C  | -3.8320935 | -3.6359589 | -2.1210947 |
| C  | -5.3316842 | -5.1246894 | -3.3528072 |
| C  | -2.8341884 | -4.6324121 | -2.1600745 |
| O  | -2.4109901 | -1.8848204 | -1.1619208 |
| H  | -4.5268346 | -7.0844100 | -3.8603577 |
| H  | -5.8612622 | -3.1144988 | -2.7390249 |
| H  | -2.2943285 | -6.6295263 | -2.7990037 |
| H  | -6.3052292 | -5.3115776 | -3.8308464 |
| H  | -1.8547861 | -4.4435612 | -1.7043279 |
| Br | -0.9269553 | -4.9850740 | 0.7710399  |
| Zn | -1.3466780 | -2.6872244 | 0.4267569  |
| H  | -6.3340357 | -1.4302878 | -1.0633356 |
| H  | -2.9651393 | -3.3389358 | 2.3374802  |
| C  | -4.9159609 | -2.4756667 | 0.3010938  |
| C  | -5.9535127 | -1.4316358 | -0.0217625 |
| H  | -5.1685747 | -3.5447505 | 0.3386279  |
| C  | -3.9682524 | -1.8507063 | 1.1437926  |
| C  | -2.9182987 | -2.3152480 | 1.9360009  |
| C  | -4.0584788 | -0.4256823 | 0.7272419  |
| O  | -5.2498153 | -0.1717510 | 0.1645454  |
| O  | -3.1415935 | 0.4061646  | 0.7237816  |
| H  | -6.8265147 | -1.4532593 | 0.6665390  |
| H  | -2.3596073 | -1.5665649 | 2.5240602  |
| H  | -4.2784271 | -1.5147555 | -1.9069810 |

|   |            |            |            |
|---|------------|------------|------------|
| C | 3.1886844  | 5.9586759  | 1.7839799  |
| C | 1.0962376  | 4.6318666  | 1.6923619  |
| H | 0.5169328  | 5.5665663  | 1.7358670  |
| C | 0.4207786  | 3.4292617  | 1.5272128  |
| C | 3.8507417  | -1.1712670 | 0.2849230  |
| C | 5.0043996  | -1.3367824 | 1.0410170  |
| H | 5.6780795  | -2.1790846 | 0.8226412  |
| C | 5.3059919  | -0.4855694 | 2.1435994  |
| C | 6.4210038  | -0.7471471 | 2.9952362  |
| C | 4.4460079  | 0.6356017  | 2.4375726  |
| C | 4.7042341  | 1.3964405  | 3.6162216  |
| C | 3.3548205  | 0.9352828  | 1.5395920  |
| C | 3.0578596  | -0.0078983 | 0.5513431  |
| O | 0.4924869  | 1.0216034  | 1.5840703  |
| O | 1.9755998  | 0.2104700  | -0.2978669 |
| P | 0.4442695  | 0.0702161  | 0.2492776  |
| O | -0.3988570 | 0.6742284  | -0.8915912 |
| O | 0.0623368  | -1.3278296 | 0.7374142  |
| C | 4.5679680  | 6.0362488  | 1.6749553  |
| C | 5.3238674  | 4.8513718  | 1.4746763  |
| H | 2.5823970  | 6.8712016  | 1.8969493  |
| H | 5.0746168  | 7.0123727  | 1.7174276  |
| H | 5.3043086  | 2.7104759  | 1.2646393  |
| H | 6.4148589  | 4.9141754  | 1.3431753  |
| C | 5.7821625  | 1.0990089  | 4.4387281  |
| C | 6.6603620  | 0.0301071  | 4.1184050  |
| H | 4.0291446  | 2.2245101  | 3.8739800  |
| H | 5.9540367  | 1.6945759  | 5.3481985  |
| H | 7.5182522  | -0.1904655 | 4.7716531  |
| H | 7.0777017  | -1.5973863 | 2.7527505  |
| C | -1.4603995 | 3.7028550  | -0.1165160 |
| C | -1.0445888 | 3.4078939  | 1.2175613  |
| C | -2.8357762 | 3.6957687  | -0.4028856 |
| C | -2.0050593 | 3.1226532  | 2.2160607  |
| C | -3.3737513 | 3.1724347  | 1.8833119  |
| C | -3.8145283 | 3.4476822  | 0.5810173  |
| H | -3.1640958 | 3.8915720  | -1.4350703 |
| C | -1.5899495 | 2.7397894  | 3.6338711  |
| H | -4.1105772 | 2.9536787  | 2.6697885  |
| C | -1.9534234 | 1.2748007  | 3.9430619  |
| H | -3.0515724 | 1.1153062  | 3.9074034  |
| H | -1.6028063 | 0.9877151  | 4.9560333  |
| H | -1.4826530 | 0.5952536  | 3.2064479  |
| C | -2.1667212 | 3.7038355  | 4.6848510  |
| H | -0.4840240 | 2.8213500  | 3.6889149  |
| H | -3.2760826 | 3.6706193  | 4.7059934  |
| H | -1.8676967 | 4.7510209  | 4.4764504  |
| H | -1.8077692 | 3.4387875  | 5.7008211  |
| C | -5.2866633 | 3.4684019  | 0.1792833  |
| C | -6.2428823 | 2.9380087  | 1.2530340  |
| H | -7.2801287 | 2.9087114  | 0.8620465  |
| H | -6.2504864 | 3.5889011  | 2.1528195  |
| H | -5.9763160 | 1.9114244  | 1.5716641  |
| C | -5.7140307 | 4.8796728  | -0.2709067 |
| H | -5.3640589 | 2.7923060  | -0.7032841 |
| H | -6.7604398 | 4.8780743  | -0.6403105 |
| H | -5.0691881 | 5.2669494  | -1.0844514 |
| H | -5.6505979 | 5.5953838  | 0.5755883  |
| C | -0.4595963 | 4.0962848  | -1.2069779 |
| C | -0.7464613 | 3.4846865  | -2.5867840 |
| H | 0.0550200  | 3.7696186  | -3.2986378 |
| H | -1.7059304 | 3.8377795  | -3.0165415 |
| H | -0.7799879 | 2.3808098  | -2.5463357 |
| C | -0.3821820 | 5.6327597  | -1.3216788 |
| H | 0.5390745  | 3.7293492  | -0.8920953 |
| H | 0.3826749  | 5.9340833  | -2.0670937 |
| H | -0.1234221 | 6.1101997  | -0.3567488 |
| H | -1.3592197 | 6.0477262  | -1.6467932 |
| H | 0.2795337  | -5.3045098 | -2.5957853 |
| H | 4.6696855  | -1.4970478 | -4.3501420 |
| H | 3.4267021  | -5.7401929 | 2.3501208  |

### TS1-8r-2

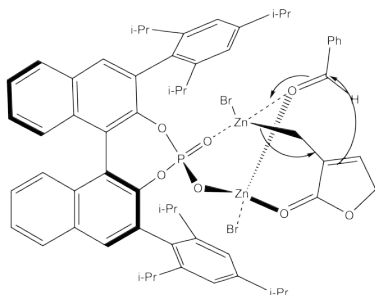

Energy(Hartree)= -11970.00916579  
number of imaginary frequencies: 1

|   |           |           |           |
|---|-----------|-----------|-----------|
| C | 1.1962299 | 2.2292499 | 1.5543172 |
| C | 2.5969188 | 2.2153407 | 1.5951558 |
| C | 3.2869554 | 3.4882330 | 1.5924768 |
| C | 4.7009521 | 3.6117642 | 1.4334951 |
| C | 2.5165344 | 4.7012865 | 1.7197722 |

|    |            |            |            |
|----|------------|------------|------------|
| C  | 0.8571702  | -4.6526299 | -3.2890430 |
| H  | 3.1946780  | 1.3109702  | -3.7323823 |
| H  | -0.8935861 | -4.4569411 | -4.5936902 |
| H  | 2.5418203  | -3.5621690 | 3.2751953  |
| C  | 1.7681275  | -3.8009275 | -2.4134867 |
| C  | 4.9561161  | -0.8659991 | -3.4827216 |
| C  | -0.1511558 | -3.8084274 | -4.0858436 |
| H  | 0.3495866  | -3.2040690 | -4.8704077 |
| C  | 2.3331350  | -2.6041892 | -2.8820346 |
| C  | 3.0576791  | -5.4415579 | 1.3478760  |
| H  | 2.3671009  | -6.2148830 | -3.6348323 |
| C  | 2.0798203  | -4.2100005 | -1.1045824 |
| C  | 1.6753884  | -5.5718102 | -4.2151598 |
| H  | 1.0119534  | -6.2293952 | -4.8151531 |
| H  | 1.6635993  | -5.1608859 | -0.7446811 |
| C  | 2.7237599  | 0.3537383  | -3.4276299 |
| H  | 5.4488347  | 0.0478312  | -3.8754352 |
| H  | 5.7016972  | -1.4330143 | -2.8893486 |
| C  | 3.1031135  | -1.7740107 | -2.0504241 |
| C  | 2.2416146  | -3.2340962 | 2.2585720  |
| C  | 2.8499965  | -3.4245910 | -0.2277821 |
| H  | 3.6740093  | -5.9620730 | 0.5869502  |
| H  | 2.0152835  | -5.8104755 | 1.2623390  |
| C  | 3.7223512  | -0.5042329 | -2.6322932 |
| C  | 3.3176623  | -2.1606588 | -0.6989299 |
| C  | 3.1321919  | -3.9139546 | 1.1993745  |
| H  | 1.8262024  | 0.5886994  | -2.8233379 |
| H  | 2.3113280  | -2.1305896 | 2.2237500  |
| H  | 2.3911682  | -0.1535925 | -4.3572411 |
| H  | -0.7053293 | -3.1100912 | -3.4264633 |
| H  | 1.1798233  | -3.5083187 | 2.1068788  |
| H  | 2.2882465  | -4.9723653 | -4.9208119 |
| H  | 4.0875610  | 0.1135650  | -1.7861369 |
| H  | 4.1787889  | -3.6279972 | 1.4299154  |
| H  | 2.1501120  | -2.2895610 | -3.9205631 |
| Zn | -2.2626786 | 0.3788850  | -1.2287157 |
| Br | -3.7290638 | 0.9958821  | -2.9059975 |
| C  | -4.3803414 | -6.0523984 | -3.4755467 |
| C  | -3.5760131 | -2.2905244 | -1.5655078 |
| C  | -3.1702355 | -5.8763166 | -2.7846626 |
| C  | -5.0343854 | -3.7848445 | -2.8989085 |
| C  | -3.8212188 | -3.6028791 | -2.1881765 |
| C  | -5.3118782 | -4.9990609 | -3.5345448 |
| C  | -2.8893460 | -4.6610850 | -2.1479564 |
| O  | -2.3843008 | -1.8823934 | -1.1835113 |
| H  | -4.5974175 | -7.0080760 | -3.9768289 |
| H  | -5.7530737 | -2.9524321 | -2.9683212 |
| H  | -2.4315697 | -6.6910047 | -2.7384990 |
| H  | -6.2535387 | -5.1247897 | -4.0901879 |
| H  | -1.9411563 | -4.5382857 | -1.6097130 |
| Br | -0.9102015 | -4.9842226 | 0.7703784  |
| Zn | -1.3199610 | -2.6940638 | 0.3978630  |
| H  | -6.2999501 | -1.4213843 | -1.1200220 |
| H  | -2.9580921 | -3.3716437 | 2.2862618  |
| C  | -4.9031646 | -2.4835550 | 0.2495559  |
| C  | -5.9365536 | -1.4348670 | -0.0717919 |
| H  | -5.1531025 | -3.5537222 | 0.2670588  |
| C  | -3.9628849 | -1.8694469 | 1.1088331  |
| C  | -2.9188560 | -2.3410580 | 1.9029156  |
| C  | -4.0495867 | -0.4393427 | 0.7096295  |
| O  | -5.2400837 | -0.1783414 | 0.1421692  |
| O  | -3.1361903 | 0.3937641  | 0.7250140  |
| H  | -6.8221749 | -1.4649393 | 0.6013987  |
| H  | -2.3610363 | -1.5984793 | 2.4992506  |
| H  | -4.2337825 | -1.4810754 | -1.9468938 |

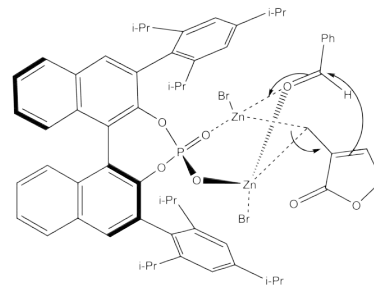

Energy(Hartree)= -11970.02186674

|   |            |            |            |
|---|------------|------------|------------|
| C | 1.3934633  | 2.3900309  | 1.2881861  |
| C | 2.7949338  | 2.4230602  | 1.2862759  |
| C | 3.4307448  | 3.7181090  | 1.3090875  |
| C | 4.8341036  | 3.8910194  | 1.1139729  |
| C | 2.6163654  | 4.8946209  | 1.5027781  |
| C | 3.2450944  | 6.1754249  | 1.5567564  |
| C | 1.2014387  | 4.7656949  | 1.6041420  |
| H | 0.5964409  | 5.6709264  | 1.7660190  |
| C | 0.5622661  | 3.5395384  | 1.4532692  |
| C | 3.8369820  | -1.1639946 | 0.3605196  |
| C | 4.9002140  | -1.3779118 | 1.2288299  |
| H | 5.4217387  | -2.3473850 | 1.2174832  |
| C | 5.2855615  | -0.4045184 | 2.1962386  |
| C | 6.3197105  | -0.6833708 | 3.1400598  |
| C | 4.5643692  | 0.8444399  | 2.2862907  |
| C | 4.8559724  | 1.7095619  | 3.3835905  |
| C | 3.5640660  | 1.1451426  | 1.2863074  |
| C | 3.2548279  | 0.1441890  | 0.3622236  |
| O | 0.7359488  | 1.1652497  | 1.1819342  |
| O | 2.3224762  | 0.4228853  | -0.6393853 |
| P | 0.7372229  | 0.3919387  | -0.2634018 |
| O | 0.0115610  | 1.1364544  | -1.3892717 |
| O | 0.2512222  | -1.0275813 | 0.0704994  |
| C | 4.6157126  | 6.3051704  | 1.3903483  |
| C | 5.4117233  | 5.1527457  | 1.1514852  |
| H | 2.6138946  | 7.0637349  | 1.7165865  |
| H | 5.0862854  | 7.2995043  | 1.4261336  |
| H | 5.4593056  | 3.0082935  | 0.9196676  |
| H | 6.4949773  | 5.2608017  | 0.9887390  |
| C | 5.8518564  | 1.3975626  | 4.2997325  |
| C | 6.6071641  | 0.2023039  | 4.1678284  |
| H | 4.2766828  | 2.6342651  | 3.5075389  |
| H | 6.0524556  | 2.0819357  | 5.1381514  |
| H | 7.4019327  | -0.0290269 | 4.8932887  |
| H | 6.8709793  | -1.6324068 | 3.0481398  |
| C | -1.6741196 | 3.9869971  | 0.3601103  |
| C | -0.9285490 | 3.4036761  | 1.4270091  |
| C | -3.0741748 | 3.8417061  | 0.3551786  |
| C | -1.6062557 | 2.6783715  | 2.4484389  |
| C | -3.0093085 | 2.5791711  | 2.4002358  |
| C | -3.7676159 | 3.1522778  | 1.3650025  |
| H | -3.6540331 | 4.2686128  | -0.4782541 |
| C | -0.8756079 | 2.0263004  | 3.6219781  |
| H | -3.5245432 | 2.0273262  | 3.2010394  |
| C | -1.1503283 | 0.5125771  | 3.6998444  |
| H | -2.2155642 | 0.3004233  | 3.9287174  |
| H | -0.5397490 | 0.0454246  | 4.4999741  |
| H | -0.8953553 | 0.0109114  | 2.7462116  |
| C | -1.2175064 | 2.7318036  | 4.9478675  |
| H | 0.2137960  | 2.1553829  | 3.4646879  |
| H | -2.2969192 | 2.6385355  | 5.1898906  |
| H | -0.9761878 | 3.8131881  | 4.9009057  |
| H | -0.6449975 | 2.2870315  | 5.7881365  |
| C | -5.2894060 | 3.0821908  | 1.3287593  |
| C | -5.8610345 | 1.7584814  | 1.8570936  |
| H | -6.9563717 | 1.7169206  | 1.6881737  |

## TS2-8-r-transmetall; COSMO



|    |            |            |            |    |            |            |            |
|----|------------|------------|------------|----|------------|------------|------------|
| H  | -5.6952310 | 1.6398583  | 2.9484960  | Zn | -1.3240719 | -2.0425464 | -0.2839336 |
| H  | -5.4040648 | 0.8844503  | 1.3507238  | H  | -6.1696562 | -2.0576961 | -2.8045189 |
| C  | -5.8941892 | 4.2852641  | 2.0792506  | H  | -2.7481296 | -0.6395358 | 0.5564248  |
| H  | -5.5779763 | 3.1645350  | 0.2591966  | C  | -4.8841541 | -1.6353446 | -1.0830992 |
| H  | -7.0019455 | 4.2817874  | 2.0086181  | C  | -6.1504925 | -1.4652311 | -1.8603730 |
| H  | -5.5259237 | 5.2451992  | 1.6643298  | H  | -4.5559469 | -2.5932710 | -0.6549467 |
| H  | -5.6196541 | 4.2564646  | 3.1550590  | C  | -4.2816854 | -0.4195044 | -0.9332861 |
| C  | -1.0226764 | 4.7749378  | -0.7774853 | C  | -3.0199571 | -0.0075694 | -0.3197477 |
| C  | -1.3894056 | 4.2199220  | -2.1633578 | C  | -5.1400036 | 0.5828982  | -1.6480242 |
| H  | -0.9173304 | 4.8273973  | -2.9627408 | O  | -6.2212921 | -0.0711092 | -2.1850304 |
| H  | -2.4831332 | 4.2190560  | -2.3466842 | O  | -4.9781587 | 1.7818055  | -1.7528961 |
| H  | -1.0278944 | 3.1815349  | -2.2826205 | H  | -7.0573735 | -1.7470318 | -1.2790027 |
| C  | -1.3655308 | 6.2732559  | -0.6671281 | H  | -3.0687346 | 1.0289826  | 0.0809810  |
| H  | 0.0764410  | 4.6766253  | -0.6751037 | H  | -3.0157377 | -1.5154129 | -3.7977864 |
| H  | -0.8423183 | 6.8546111  | -1.4542844 |    |            |            |            |
| H  | -1.0738178 | 6.6895523  | 0.3189251  |    |            |            |            |
| H  | -2.4556099 | 6.4440818  | -0.7895527 |    |            |            |            |
| H  | -0.1771681 | -5.2952739 | -2.0079653 |    |            |            |            |
| H  | 4.8401810  | -2.6442389 | -4.0140668 |    |            |            |            |
| H  | 2.3811434  | -4.9151112 | 3.3572519  |    |            |            |            |
| C  | 0.7058567  | -5.0838515 | -2.6514743 |    |            |            |            |
| H  | 3.7756663  | 0.3927791  | -4.1562694 |    |            |            |            |
| H  | -0.5513420 | -5.3029970 | -4.4263930 |    |            |            |            |
| H  | 1.7243967  | -2.5002482 | 3.6246662  |    |            |            |            |
| C  | 1.5481377  | -4.0591150 | -1.8999860 |    |            |            |            |
| C  | 5.1702679  | -1.8801533 | -3.2790733 |    |            |            |            |
| C  | 0.1911659  | -4.5922866 | -4.0105050 |    |            |            |            |
| H  | 1.0129524  | -4.5058006 | -4.7512793 |    |            |            |            |
| C  | 2.3146188  | -3.0860795 | -2.5577669 |    |            |            |            |
| C  | 2.1640995  | -4.8291544 | 2.2732416  |    |            |            |            |
| H  | 1.8049906  | -6.8009449 | -1.8167671 |    |            |            |            |
| C  | 1.6328117  | -4.1269819 | -0.4948530 |    |            |            |            |
| C  | 1.4791829  | -6.4093888 | -2.8012640 |    |            |            |            |
| H  | 0.8514581  | -7.1829893 | -3.2908743 |    |            |            |            |
| H  | 1.0405283  | -4.8954610 | 0.0244993  |    |            |            |            |
| C  | 3.1475797  | -0.3900787 | -3.6838681 |    |            |            |            |
| H  | 5.8169251  | -1.1533018 | -3.8132132 |    |            |            |            |
| H  | 5.7875792  | -2.3942862 | -2.5144747 |    |            |            |            |
| C  | 3.1198634  | -2.1720811 | -1.8516579 |    |            |            |            |
| C  | 1.5993640  | -2.3874148 | 2.5278719  |    |            |            |            |
| C  | 2.4396589  | -3.2580494 | 0.2612265  |    |            |            |            |
| H  | 2.7618352  | -5.5974304 | 1.7418466  |    |            |            |            |
| H  | 1.0899235  | -5.0749004 | 2.1396077  |    |            |            |            |
| C  | 3.9621387  | -1.1695680 | -2.6374327 |    |            |            |            |
| C  | 3.1699197  | -2.2424874 | -0.4347514 |    |            |            |            |
| C  | 2.4885504  | -3.4070986 | 1.7884574  |    |            |            |            |
| H  | 2.2702503  | 0.1066801  | -3.2251918 |    |            |            |            |
| H  | 1.8451342  | -1.3418997 | 2.2640052  |    |            |            |            |
| H  | 2.7823267  | -1.0501744 | -4.4980156 |    |            |            |            |
| H  | -0.2905257 | -3.5981941 | -3.9283181 |    |            |            |            |
| H  | 0.5303977  | -2.5496140 | 2.2842678  |    |            |            |            |
| H  | 2.3873474  | -6.2608385 | -3.4222776 |    |            |            |            |
| H  | 4.3687306  | -0.4317484 | -1.9162312 |    |            |            |            |
| H  | 3.5337800  | -3.1999871 | 2.0952507  |    |            |            |            |
| H  | 2.2895740  | -3.0272291 | -3.6556836 |    |            |            |            |
| Zn | -1.8241107 | 0.5285796  | -1.9297645 |    |            |            |            |
| Br | -2.3372425 | 1.0357265  | -4.1521918 |    |            |            |            |
| C  | -4.4958202 | -6.1105451 | -3.4824458 |    |            |            |            |
| C  | -2.6913779 | -2.2791048 | -3.0505645 |    |            |            |            |
| C  | -3.5427002 | -5.9187563 | -2.4620468 |    |            |            |            |
| C  | -4.2521087 | -3.7967811 | -4.1721937 |    |            |            |            |
| C  | -3.2916947 | -3.5954892 | -3.1463872 |    |            |            |            |
| C  | -4.8498076 | -5.0506707 | -4.3373973 |    |            |            |            |
| C  | -2.9399046 | -4.6710666 | -2.2933188 |    |            |            |            |
| O  | -1.7673557 | -1.9197488 | -2.2646868 |    |            |            |            |
| H  | -4.9655474 | -7.0976402 | -3.6123464 |    |            |            |            |
| H  | -4.5128360 | -2.9604827 | -4.8399576 |    |            |            |            |
| H  | -3.2715457 | -6.7509716 | -1.7955740 |    |            |            |            |
| H  | -5.5914801 | -5.2073168 | -5.1345221 |    |            |            |            |
| H  | -2.2073208 | -4.5137381 | -1.4899952 |    |            |            |            |
| Br | -2.1617220 | -3.6746039 | 1.1275564  |    |            |            |            |

### TS2-8-r-transmetall

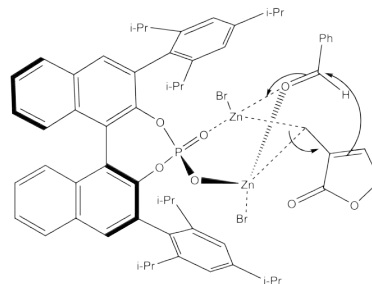

Energy(Hartree) = -11970.00862126  
number of imaginary frequencies: 1

|   |            |            |            |
|---|------------|------------|------------|
| C | 1.3936546  | 2.3870007  | 1.2931972  |
| C | 2.7951087  | 2.4219015  | 1.2906615  |
| C | 3.4298054  | 3.7173546  | 1.3122137  |
| C | 4.8329518  | 3.8913908  | 1.1182586  |
| C | 2.6145077  | 4.8933763  | 1.5032738  |
| C | 3.2426325  | 6.1739975  | 1.5564099  |
| C | 1.1998256  | 4.7631327  | 1.6017805  |
| H | 0.5926501  | 5.6676707  | 1.7591573  |
| C | 0.5614321  | 3.5366024  | 1.4529084  |
| C | 3.8368393  | -1.1630132 | 0.3600798  |
| C | 4.9029357  | -1.3760705 | 1.2246883  |
| H | 5.4244058  | -2.3455985 | 1.2096238  |
| C | 5.2907133  | -0.4040031 | 2.1919706  |
| C | 6.3278027  | -0.6814908 | 3.1322243  |
| C | 4.5683039  | 0.8437923  | 2.2850971  |
| C | 4.8626517  | 1.7084478  | 3.3817624  |
| C | 3.5649943  | 1.1446431  | 1.2883664  |
| C | 3.2533116  | 0.1448049  | 0.3636407  |
| O | 0.7377522  | 1.1612657  | 1.1913748  |
| O | 2.3193908  | 0.4236850  | -0.6347285 |
| P | 0.7345753  | 0.3888899  | -0.2553775 |
| O | 0.0013977  | 1.1321529  | -1.3751138 |
| O | 0.2596301  | -1.0348943 | 0.0788379  |
| C | 4.6128941  | 6.3047982  | 1.3923359  |
| C | 5.4095872  | 5.1530921  | 1.1557903  |
| H | 2.6102488  | 7.0619278  | 1.7135452  |
| H | 5.0824704  | 7.2995609  | 1.4277280  |
| H | 5.4581570  | 3.0084247  | 0.9257367  |
| H | 6.4929684  | 5.2614500  | 0.9944297  |
| C | 5.8617778  | 1.3973178  | 4.2939755  |
| C | 6.6177000  | 0.2034714  | 4.1591906  |
| H | 4.2824008  | 2.6323189  | 3.5066675  |
| H | 6.0644074  | 2.0817218  | 5.1318051  |
| H | 7.4151375  | -0.0275122 | 4.8817400  |
| H | 6.8800002  | -1.6297832 | 3.0380177  |
| C | -1.6732360 | 3.9765033  | 0.3530624  |
| C | -0.9291016 | 3.4002373  | 1.4247195  |

|   |            |            |            |    |            |            |            |
|---|------------|------------|------------|----|------------|------------|------------|
| C | -3.0729438 | 3.8294909  | 0.3470403  | H  | 4.3595336  | -0.4309349 | -1.9167718 |
| C | -1.6071819 | 2.6812023  | 2.4498051  | H  | 3.5392358  | -3.2008551 | 2.0977830  |
| C | -3.0099828 | 2.5828965  | 2.4015214  | H  | 2.2773640  | -3.0274749 | -3.6491391 |
| C | -3.7674142 | 3.1490968  | 1.3621902  | Zn | -1.8339155 | 0.5395652  | -1.9253374 |
| H | -3.6522644 | 4.2480172  | -0.4909575 | Br | -2.3877183 | 1.0321960  | -4.1332426 |
| C | -0.8768758 | 2.0364147  | 3.6275752  | C  | -4.4975758 | -6.0889154 | -3.5340438 |
| H | -3.5260227 | 2.0373014  | 3.2060471  | C  | -2.6981505 | -2.2576534 | -3.0365446 |
| C | -1.1501486 | 0.5230728  | 3.7143318  | C  | -3.5492843 | -5.9101163 | -2.5077844 |
| H | -2.2152041 | 0.3106204  | 3.9435983  | C  | -4.2545667 | -3.7636402 | -4.1845094 |
| H | -0.5402662 | 0.0603008  | 4.5174249  | C  | -3.2987667 | -3.5755828 | -3.1525578 |
| H | -0.8940051 | 0.0156463  | 2.7641524  | C  | -4.8492389 | -5.0159291 | -4.3727520 |
| C | -1.2191348 | 2.7500271  | 4.9488333  | C  | -2.9485872 | -4.6641930 | -2.3168452 |
| H | 0.2125268  | 2.1651264  | 3.4697252  | O  | -1.7639911 | -1.9133650 | -2.2560240 |
| H | -2.2984716 | 2.6588496  | 5.1915169  | H  | -4.9650824 | -7.0746056 | -3.6816665 |
| H | -0.9788108 | 3.8311164  | 4.8949737  | H  | -4.5132744 | -2.9167940 | -4.8400568 |
| H | -0.6473089 | 2.3111617  | 5.7926193  | H  | -3.2787900 | -6.7506623 | -1.8513082 |
| C | -5.2893014 | 3.0829573  | 1.3271408  | H  | -5.5868611 | -5.1608185 | -5.1760809 |
| C | -5.8648416 | 1.7686294  | 1.8736528  | H  | -2.2221363 | -4.5174463 | -1.5057247 |
| H | -6.9600705 | 1.7273978  | 1.7043366  | Br | -2.1412074 | -3.7153972 | 1.1028933  |
| H | -5.7014247 | 1.6640381  | 2.9669247  | Zn | -1.3021987 | -2.0647507 | -0.2815801 |
| H | -5.4100466 | 0.8864212  | 1.3797457  | H  | -6.1382317 | -2.0841667 | -2.8159801 |
| C | -5.8894527 | 4.2982497  | 2.0611537  | H  | -2.7310019 | -0.6519551 | 0.5608683  |
| H | -5.5782001 | 3.1498604  | 0.2567827  | C  | -4.8508908 | -1.6639780 | -1.0948787 |
| H | -6.9972072 | 4.2984838  | 1.9910999  | C  | -6.1234831 | -1.5001965 | -1.8656495 |
| H | -5.5176709 | 5.2508702  | 1.6331991  | H  | -4.5095940 | -2.6189424 | -0.6703985 |
| H | -5.6143588 | 4.2846190  | 3.1370251  | C  | -4.2711483 | -0.4383774 | -0.9249683 |
| C | -1.0206828 | 4.7624116  | -0.7854022 | C  | -3.0210648 | -0.0153730 | -0.3055451 |
| C | -1.3860118 | 4.2092279  | -2.1721880 | C  | -5.1504066 | 0.5623270  | -1.6235902 |
| H | -0.9114803 | 4.8163725  | -2.9701665 | O  | -6.2190925 | -0.1069557 | -2.1720520 |
| H | -2.4789074 | 4.2097589  | -2.3597348 | O  | -5.0124955 | 1.7636124  | -1.7015934 |
| H | -1.0241333 | 3.1714672  | -2.2940149 | H  | -7.0231842 | -1.8052527 | -1.2830865 |
| C | -1.3637341 | 6.2606907  | -0.6741955 | H  | -3.0750784 | 1.0215741  | 0.0928805  |
| H | 0.0783501  | 4.6637209  | -0.6819148 | H  | -3.0249226 | -1.4799875 | -3.7692429 |
| H | -0.8407495 | 6.8431549  | -1.4606197 |    |            |            |            |
| H | -1.0739813 | 6.6772567  | 0.3123031  |    |            |            |            |
| H | -2.4536279 | 6.4315965  | -0.7968714 |    |            |            |            |
| H | -0.1796377 | -5.3005510 | -1.9923116 |    |            |            |            |
| H | 4.8298507  | -2.6454142 | -4.0128896 |    |            |            |            |
| H | 2.3840875  | -4.9129433 | 3.3638920  |    |            |            |            |
| C | 0.7010606  | -5.0875354 | -2.6388872 |    |            |            |            |
| H | 3.7619450  | 0.3922922  | -4.1558591 |    |            |            |            |
| H | -0.5619662 | -5.3104806 | -4.4101432 |    |            |            |            |
| H | 1.7374788  | -2.4962150 | 3.6327161  |    |            |            |            |
| C | 1.5430056  | -4.0600224 | -1.8907704 |    |            |            |            |
| C | 5.1599665  | -1.8800114 | -3.2794226 |    |            |            |            |
| C | 0.1801262  | -4.5981572 | -3.9962722 |    |            |            |            |
| H | 0.9989136  | -4.5100161 | -4.7401476 |    |            |            |            |
| C | 2.3062942  | -3.0868161 | -2.5513977 |    |            |            |            |
| C | 2.1649385  | -4.8263830 | 2.2804405  |    |            |            |            |
| H | 1.8090795  | -6.8000024 | -1.8072234 |    |            |            |            |
| C | 1.6314873  | -4.1269744 | -0.4861341 |    |            |            |            |
| C | 1.4776625  | -6.4107375 | -2.7905597 |    |            |            |            |
| H | 0.8519162  | -7.1874274 | -3.2778850 |    |            |            |            |
| H | 1.0408308  | -4.8948756 | 0.0357503  |    |            |            |            |
| C | 3.1354266  | -0.3906286 | -3.6817464 |    |            |            |            |
| H | 5.8057823  | -1.1540712 | -3.8157000 |    |            |            |            |
| H | 5.7783980  | -2.3935505 | -2.5155862 |    |            |            |            |
| C | 3.1130980  | -2.1721737 | -1.8484703 |    |            |            |            |
| C | 1.6083155  | -2.3836458 | 2.5365154  |    |            |            |            |
| C | 2.4401705  | -3.2575722 | 0.2669872  |    |            |            |            |
| H | 2.7586369  | -5.5970279 | 1.7480775  |    |            |            |            |
| H | 1.0894215  | -5.0678158 | 2.1508182  |    |            |            |            |
| C | 3.9524284  | -1.1694158 | -2.6369774 |    |            |            |            |
| C | 3.1676059  | -2.2422930 | -0.4319610 |    |            |            |            |
| C | 2.4925095  | -3.4056028 | 1.7942056  |    |            |            |            |
| H | 2.2592551  | 0.1071782  | -3.2224865 |    |            |            |            |
| H | 1.8555040  | -1.3387599 | 2.2720859  |    |            |            |            |
| H | 2.7690007  | -1.0501484 | -4.4958367 |    |            |            |            |
| H | -0.3032295 | -3.6051280 | -3.9126402 |    |            |            |            |
| H | 0.5379895  | -2.5444498 | 2.2985090  |    |            |            |            |
| H | 2.3837445  | -6.2595952 | -3.4137118 |    |            |            |            |

### int1-8-r-transmetall; COSMO

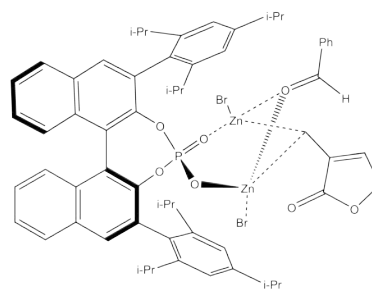

Energy(Hartree) = -11970.02437919

|   |           |            |            |
|---|-----------|------------|------------|
| C | 1.3481646 | 2.2936490  | 1.2606207  |
| C | 2.7491915 | 2.2860951  | 1.2926041  |
| C | 3.4197949 | 3.5620513  | 1.3568956  |
| C | 4.8313442 | 3.6988090  | 1.1958439  |
| C | 2.6344094 | 4.7565724  | 1.5606770  |
| C | 3.2971234 | 6.0179390  | 1.6524882  |
| C | 1.2155475 | 4.6631227  | 1.6462090  |
| H | 0.6329208 | 5.5785300  | 1.8323955  |
| C | 0.5459314 | 3.4579684  | 1.4599996  |
| C | 3.7765042 | -1.3073807 | 0.3493828  |
| C | 4.7988313 | -1.5472014 | 1.2588245  |
| H | 5.3190953 | -2.5172825 | 1.2442998  |
| C | 5.1479213 | -0.5973798 | 2.2623908  |
| C | 6.1370612 | -0.9040458 | 3.2450473  |
| C | 4.4411274 | 0.6604585  | 2.3390885  |
| C | 4.7010332 | 1.5082134  | 3.4578678  |
| C | 3.4846535 | 0.9880759  | 1.3044191  |
| C | 3.1937826 | -0.0000750 | 0.3610218  |
| O | 0.6604804 | 1.0948091  | 1.0989511  |
| O | 2.2941059 | 0.2952929  | -0.6667852 |
| P | 0.7002200 | 0.3197622  | -0.3472322 |

|   |            |            |            |    |            |            |            |
|---|------------|------------|------------|----|------------|------------|------------|
| O | 0.0524142  | 1.1123667  | -1.4982526 | H  | 6.0506565  | -1.1102215 | -3.6671517 |
| O | 0.1083522  | -1.0681046 | -0.0567252 | H  | 5.9393896  | -2.4151002 | -2.4374277 |
| C | 4.6738997  | 6.1124085  | 1.5154042  | C  | 3.2316052  | -2.2291747 | -1.9439290 |
| C | 5.4426769  | 4.9428938  | 1.2703264  | C  | 1.3970518  | -2.6475266 | 2.3005185  |
| H | 2.6879056  | 6.9201782  | 1.8194483  | C  | 2.4084911  | -3.4077950 | 0.0660621  |
| H | 5.1709240  | 7.0922644  | 1.5805683  | H  | 2.6703357  | -5.8029953 | 1.4678835  |
| H | 5.4357009  | 2.8023931  | 0.9978765  | H  | 0.9658138  | -5.3249636 | 1.7683312  |
| H | 6.5317724  | 5.0236271  | 1.1326654  | C  | 4.1207835  | -1.1882730 | -2.6210891 |
| C | 5.6524584  | 1.1693171  | 4.4109160  | C  | 3.1709184  | -2.3553912 | -0.5304733 |
| C | 6.3940820  | -0.0361384 | 4.2956901  | C  | 2.3538839  | -3.6211850 | 1.5853094  |
| H | 4.1314798  | 2.4404541  | 3.5698214  | H  | 2.4719424  | 0.1201819  | -3.2487546 |
| H | 5.8280468  | 1.8402750  | 5.2656390  | H  | 1.6502461  | -1.5886745 | 2.1047153  |
| H | 7.1539170  | -0.2889050 | 5.0508317  | H  | 3.0574848  | -0.9783101 | -4.5426238 |
| H | 6.6781948  | -1.8597885 | 3.1630231  | H  | -0.3128829 | -3.4925389 | -3.9759818 |
| C | -1.7030295 | 4.0238363  | 0.4469584  | H  | 0.3519696  | -2.8036860 | 1.9663973  |
| C | -0.9483859 | 3.3625185  | 1.4598190  | H  | 2.6019469  | -5.9470975 | -4.1090483 |
| C | -3.1083995 | 3.9444688  | 0.4869760  | H  | 4.4753161  | -0.4861927 | -1.8391138 |
| C | -1.6257129 | 2.6172714  | 2.4692323  | H  | 3.3719073  | -3.4124389 | 1.9731084  |
| C | -3.0329231 | 2.5793211  | 2.4629007  | H  | 2.5481719  | -3.0171570 | -3.8382160 |
| C | -3.7985154 | 3.2364796  | 1.4850344  | Zn | -1.7486960 | 0.5471403  | -2.1186370 |
| H | -3.6948398 | 4.4319959  | -0.3073030 | Br | -2.5091828 | 1.1203867  | -4.2393012 |
| C | -0.8931054 | 1.8733209  | 3.5861771  | C  | -4.0774003 | -6.2172498 | -2.8182509 |
| H | -3.5457316 | 2.0109837  | 3.2540827  | C  | -2.6925846 | -2.2044530 | -3.0297165 |
| C | -1.2091920 | 0.3656934  | 3.5691888  | C  | -3.0783973 | -5.7878485 | -1.9227635 |
| H | -2.2785108 | 0.1645209  | 3.7881306  | C  | -4.1533852 | -4.0155059 | -3.8344402 |
| H | -0.6076487 | -0.1707859 | 4.3315665  | C  | -3.1528913 | -3.5742481 | -2.9308008 |
| H | -0.9690851 | -0.0829815 | 2.5857481  | C  | -4.6154495 | -5.3335388 | -3.7734754 |
| C | -1.1931412 | 2.4976939  | 4.9618763  | C  | -2.6133571 | -4.4720628 | -1.9743458 |
| H | 0.1966978  | 1.9830853  | 3.4188353  | O  | -1.8508932 | -1.6796119 | -2.2521541 |
| H | -2.2689797 | 2.4122818  | 5.2215281  | H  | -4.4387822 | -7.2562095 | -2.7732499 |
| H | -0.9272971 | 3.5741460  | 4.9803944  | H  | -4.5589792 | -3.3123444 | -4.5792200 |
| H | -0.6142895 | 1.9860862  | 5.7585437  | H  | -2.6632361 | -6.4869443 | -1.1817659 |
| C | -5.3218832 | 3.2232796  | 1.4925464  | H  | -5.3927210 | -5.6800434 | -4.4704806 |
| C | -5.9249461 | 1.8774825  | 1.9221349  | H  | -1.8311711 | -4.1254802 | -1.2848532 |
| H | -7.0270742 | 1.8912251  | 1.7991742  | Br | -2.7160175 | -3.0301931 | 1.2769110  |
| H | -5.7190883 | 1.6510279  | 2.9891920  | Zn | -1.8297774 | -1.3622289 | -0.0875059 |
| H | -5.5264475 | 1.0383586  | 1.3166951  | H  | -6.3744713 | -1.4857414 | -2.8699664 |
| C | -5.8599553 | 4.3749390  | 2.3644971  | H  | -3.1088930 | 0.2273994  | 0.6911235  |
| H | -5.6386552 | 3.4111329  | 0.4442528  | C  | -5.0634886 | -1.1286017 | -1.1603929 |
| H | -6.9686160 | 4.4155626  | 2.3296341  | C  | -6.3253360 | -0.8927016 | -1.9280432 |
| H | -5.4683969 | 5.3544871  | 2.0234933  | H  | -4.7761145 | -2.1046622 | -0.7416464 |
| H | -5.5556402 | 4.2414545  | 3.4242797  | C  | -4.3899287 | 0.0463228  | -1.0391230 |
| C | -1.0591298 | 4.8026000  | -0.7009091 | C  | -3.0940837 | 0.3897165  | -0.4137635 |
| C | -1.4448708 | 4.2202425  | -2.0719177 | C  | -5.2069177 | 1.0979660  | -1.7288438 |
| H | -1.0019675 | 4.8214557  | -2.8923656 | O  | -6.3276179 | 0.5014878  | -2.2525660 |
| H | -2.5421934 | 4.1886898  | -2.2288816 | O  | -4.9947604 | 2.2901524  | -1.8161188 |
| H | -1.0593098 | 3.1886433  | -2.1799287 | H  | -7.2416461 | -1.1295910 | -1.3415930 |
| C | -1.3943353 | 6.3030500  | -0.6101845 | H  | -2.9426017 | 1.4958699  | -0.4452644 |
| H | 0.0405776  | 4.7023809  | -0.6089012 | H  | -3.0800348 | -1.5737051 | -3.8663053 |
| H | -0.8739907 | 6.8691387  | -1.4100844 |    |            |            |            |
| H | -1.0899491 | 6.7306291  | 0.3673450  |    |            |            |            |
| H | -2.4836961 | 6.4812917  | -0.7267156 |    |            |            |            |
| H | 0.0653790  | -5.4834831 | -2.4118552 |    |            |            |            |
| H | 5.0961480  | -2.5901136 | -4.0079403 |    |            |            |            |
| H | 2.1646712  | -5.1960462 | 3.0794870  |    |            |            |            |
| C | 0.8842153  | -5.0857488 | -3.0517403 |    |            |            |            |
| H | 4.0308755  | 0.4435147  | -4.0751498 |    |            |            |            |
| H | -0.4792305 | -5.0975111 | -4.7655433 |    |            |            |            |
| H | 1.4393801  | -2.8100538 | 3.3975798  |    |            |            |            |
| C | 1.6845866  | -4.1213118 | -2.1848007 |    |            |            |            |
| C | 5.3725266  | -1.8636064 | -3.2149855 |    |            |            |            |
| C | 0.2352880  | -4.4095373 | -4.2690923 |    |            |            |            |
| H | 0.9909750  | -4.1171420 | -5.0273204 |    |            |            |            |
| C | 2.4932645  | -3.1200842 | -2.7438110 |    |            |            |            |
| C | 2.0231358  | -5.0672581 | 1.9872546  |    |            |            |            |
| H | 2.1756603  | -6.8095743 | -2.5985240 |    |            |            |            |
| C | 1.6727153  | -4.2529311 | -0.7841631 |    |            |            |            |
| C | 1.7525830  | -6.2851624 | -3.4789048 |    |            |            |            |
| H | 1.1609837  | -7.0175584 | -4.0671879 |    |            |            |            |
| H | 1.0529114  | -5.0486098 | -0.3431620 |    |            |            |            |
| C | 3.3739661  | -0.3577038 | -3.6784663 |    |            |            |            |

### int1-8-r-transmetall

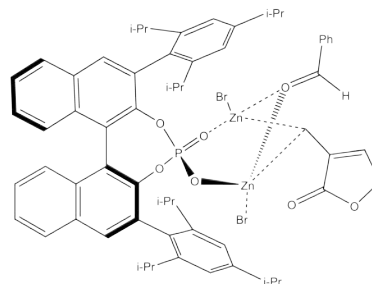

Energy(Hartree) = -11970.0108003

|   |           |           |           |
|---|-----------|-----------|-----------|
| C | 1.3569880 | 2.2935035 | 1.2586106 |
| C | 2.7582443 | 2.2958724 | 1.2888086 |
| C | 3.4202961 | 3.5760617 | 1.3510518 |
| C | 4.8304099 | 3.7221441 | 1.1878036 |
| C | 2.6276307 | 4.7652490 | 1.5561153 |
| C | 3.2826837 | 6.0301985 | 1.6465750 |
| C | 1.2099370 | 4.6618314 | 1.6438447 |

|   |            |            |            |    |            |            |            |
|---|------------|------------|------------|----|------------|------------|------------|
| H | 0.6203414  | 5.5728137  | 1.8297502  | H  | -0.4934361 | -5.1246363 | -4.7070918 |
| C | 0.5474649  | 3.4527345  | 1.4586998  | H  | 1.4558533  | -2.7549476 | 3.4241606  |
| C | 3.7930035  | -1.2964050 | 0.3534053  | C  | 1.6814378  | -4.1269766 | -2.1428792 |
| C | 4.8181343  | -1.5306119 | 1.2607396  | C  | 5.3748106  | -1.8957575 | -3.2095783 |
| H | 5.3368063  | -2.5016626 | 1.2489651  | C  | 0.2261026  | -4.4347908 | -4.2204968 |
| C | 5.1705811  | -0.5761207 | 2.2582075  | H  | 0.9811999  | -4.1565978 | -4.9845412 |
| C | 6.1634695  | -0.8759534 | 3.2384356  | C  | 2.4923168  | -3.1357403 | -2.7156009 |
| C | 4.4612548  | 0.6802609  | 2.3321828  | C  | 2.0282454  | -5.0294021 | 2.0367641  |
| C | 4.7228779  | 1.5323013  | 3.4470334  | H  | 2.1592495  | -6.8215967 | -2.5230679 |
| C | 3.5013015  | 1.0023364  | 1.2990152  | C  | 1.6731087  | -4.2431200 | -0.7412966 |
| C | 3.2108964  | 0.0113818  | 0.3581805  | C  | 1.7361391  | -6.3074923 | -3.4092428 |
| O | 0.6775881  | 1.0903806  | 1.0976083  | H  | 1.1413692  | -7.0452766 | -3.9875901 |
| O | 2.3122979  | 0.3023044  | -0.6704526 | H  | 1.0490172  | -5.0289259 | -0.2889242 |
| P | 0.7175609  | 0.3216898  | -0.3530864 | C  | 3.3812026  | -0.3847576 | -3.6806412 |
| O | 0.0649068  | 1.1183989  | -1.4967449 | H  | 6.0552563  | -1.1505947 | -3.6716699 |
| O | 0.1339883  | -1.0711071 | -0.0690360 | H  | 5.9412672  | -2.4427259 | -2.4287981 |
| C | 4.6580879  | 6.1338037  | 1.5076972  | C  | 3.2372144  | -2.2396764 | -1.9281577 |
| C | 5.4336999  | 4.9696762  | 1.2617696  | C  | 1.4107040  | -2.6049914 | 2.3255507  |
| H | 2.6676324  | 6.9284237  | 1.8137059  | C  | 2.4158404  | -3.3929256 | 0.0971042  |
| H | 5.1486086  | 7.1169378  | 1.5719200  | H  | 2.6693106  | -5.7735465 | 1.5219069  |
| H | 5.4391238  | 2.8288911  | 0.9894294  | H  | 0.9683431  | -5.2832746 | 1.8266179  |
| H | 6.5220300  | 5.0572146  | 1.1226401  | C  | 4.1280276  | -1.2090855 | -2.6186276 |
| C | 5.6786146  | 1.1997101  | 4.3973471  | C  | 3.1812099  | -2.3511730 | -0.5136591 |
| C | 6.4225649  | -0.0037710 | 4.2842904  | C  | 2.3632893  | -3.5889132 | 1.6187177  |
| H | 4.1511781  | 2.4633860  | 3.5564993  | H  | 2.4850993  | 0.1048969  | -3.2522833 |
| H | 5.8555871  | 1.8746330  | 5.2485880  | H  | 1.6664916  | -1.5491304 | 2.1180206  |
| H | 7.1858262  | -0.2519246 | 5.0374234  | H  | 3.0561143  | -1.0115498 | -4.5370805 |
| H | 6.7063378  | -1.8308991 | 3.1583946  | H  | -0.3151769 | -3.5106984 | -3.9375977 |
| C | -1.7048832 | 4.0089936  | 0.4484054  | H  | 0.3641622  | -2.7637556 | 1.9976289  |
| C | -0.9461277 | 3.3492450  | 1.4592594  | H  | 2.5865520  | -5.9815737 | -4.0440394 |
| C | -3.1095258 | 3.9215568  | 0.4891446  | H  | 4.4878050  | -0.5013354 | -1.8441363 |
| C | -1.6185864 | 2.5984607  | 2.4675677  | H  | 3.3827159  | -3.3789026 | 2.0023141  |
| C | -3.0253111 | 2.5547304  | 2.4628986  | H  | 2.5436358  | -3.0441407 | -3.8111435 |
| C | -3.7950764 | 3.2098559  | 1.4874056  | Zn | -1.7332050 | 0.5657871  | -2.1270580 |
| H | -3.6993676 | 4.4040151  | -0.3055922 | Br | -2.5300900 | 1.1306096  | -4.2293431 |
| C | -0.8815061 | 1.8548064  | 3.5818041  | C  | -4.1710098 | -6.1584128 | -2.9383752 |
| H | -3.5344837 | 1.9826617  | 3.2537220  | C  | -2.7082244 | -2.1651300 | -3.0558615 |
| C | -1.1910572 | 0.3459334  | 3.5617726  | C  | 3.1663425  | -5.7679579 | -2.0329348 |
| H | -2.2584896 | 0.1384158  | 3.7838147  | C  | -4.2039076 | -3.9321139 | -3.9010295 |
| H | -0.5850376 | -0.1912303 | 4.3199983  | C  | -3.1961672 | -3.5304854 | -2.9881453 |
| H | -0.9525082 | -0.0993622 | 2.5765622  | C  | -4.6904254 | -5.2424436 | -3.8729145 |
| C | -1.1815754 | 2.4752146  | 4.9591164  | C  | -2.6748976 | -4.4603934 | -2.0540389 |
| H | 0.2075832  | 1.9694026  | 3.4132289  | O  | -1.8425498 | -1.6808079 | -2.2811451 |
| H | -2.2566259 | 2.3865205  | 5.2205736  | H  | -4.5524467 | -7.1910403 | -2.9180263 |
| H | -0.9199978 | 3.5524995  | 4.9794801  | H  | -4.5949038 | -3.2033323 | -4.6290857 |
| H | -0.6005386 | 1.9642767  | 5.7545848  | H  | -2.7659925 | -6.4890676 | -1.3049947 |
| C | -5.3183254 | 3.1915125  | 1.4970312  | H  | -5.4725665 | -5.5578343 | -4.5793459 |
| C | -5.9163173 | 1.8440907  | 1.9281933  | H  | -1.8904606 | -4.1438607 | -1.3528557 |
| H | -7.0184631 | 1.8530575  | 1.8049063  | Br | -2.6742606 | -3.0889882 | 1.2135591  |
| H | -5.7112883 | 1.6193670  | 2.9958424  | Zn | -1.7983321 | -1.3878643 | -0.1115115 |
| H | -5.5141223 | 1.0055082  | 1.3246061  | H  | -6.3495528 | -1.4983705 | -2.8741155 |
| C | -5.8585929 | 4.3419288  | 2.3689352  | H  | -3.0791600 | 0.1816292  | 0.6925360  |
| H | -5.6370560 | 3.3764021  | 0.4489041  | C  | -5.0342607 | -1.1548871 | -1.1644064 |
| H | -6.9673802 | 4.3801405  | 2.3361244  | C  | -6.2999884 | -0.9124770 | -1.9267332 |
| H | -5.4700387 | 5.3221449  | 2.0270213  | H  | -4.7411828 | -2.1314743 | -0.7504251 |
| H | -5.5520032 | 4.2112872  | 3.4283209  | C  | -4.3653106 | 0.0218474  | -1.0343373 |
| C | -1.0669275 | 4.7956249  | -0.6975369 | C  | -3.0712839 | 0.3635079  | -0.4093952 |
| C | -1.4474240 | 4.2153204  | -2.0707994 | C  | -5.1914913 | 1.0805024  | -1.7083732 |
| H | -1.0161514 | 4.8273502  | -2.8892688 | O  | -6.3114558 | 0.4812776  | -2.2362592 |
| H | -2.5441041 | 4.1664414  | -2.2273506 | O  | -4.9875278 | 2.2730800  | -1.7729528 |
| H | -1.0435933 | 3.1917757  | -2.1870405 | H  | -7.2137586 | -1.1615893 | -1.3398076 |
| C | -1.4146345 | 6.2929115  | -0.6012536 | H  | -2.9241043 | 1.4704384  | -0.4273505 |
| H | 0.0335591  | 4.7043604  | -0.6055245 | H  | -3.0938737 | -1.5012402 | -3.8687093 |
| H | -0.8979247 | 6.8670427  | -1.3976928 |    |            |            |            |
| H | -1.1168973 | 6.7197198  | 0.3786566  |    |            |            |            |
| H | -2.5049679 | 6.4632897  | -0.7191284 |    |            |            |            |
| H | 0.0548764  | -5.4834090 | -2.3492793 |    |            |            |            |
| H | 5.0932968  | -2.6292029 | -3.9941597 |    |            |            |            |
| H | 2.1738230  | -5.1482478 | 3.1295239  |    |            |            |            |
| C | 0.8747498  | -5.0984090 | -2.9961641 |    |            |            |            |
| H | 4.0409836  | 0.4077665  | -4.0895834 |    |            |            |            |

### 7.2.4.2 to 15d-ma and 15d-2-ma

TS1-8d-2; COSMO

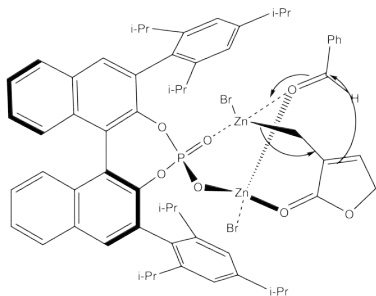

Energy(Hartree) = -11970.02569167

|   |            |            |            |
|---|------------|------------|------------|
| C | 1.1352284  | 2.3243595  | 1.6738986  |
| C | 2.5334390  | 2.2887239  | 1.6194591  |
| C | 3.2318387  | 3.5537611  | 1.5789258  |
| C | 4.6374842  | 3.6604500  | 1.3517466  |
| C | 2.4752512  | 4.7744035  | 1.7356140  |
| C | 3.1614602  | 6.0264901  | 1.7435321  |
| C | 1.0538482  | 4.7215268  | 1.8089092  |
| H | 0.4913911  | 5.6646955  | 1.8832026  |
| C | 0.3584792  | 3.5214988  | 1.7147309  |
| C | 3.5684685  | -1.1604751 | 0.2620873  |
| C | 4.6990870  | -1.4282785 | 1.0251519  |
| H | 5.2844989  | -2.3381888 | 0.8237355  |
| C | 5.0959454  | -0.5822074 | 2.1021296  |
| C | 6.2024981  | -0.9265797 | 2.9360090  |
| C | 4.3505793  | 0.6226907  | 2.3852564  |
| C | 4.7127591  | 1.3885109  | 3.5336654  |
| C | 3.2535205  | 0.9848632  | 1.5193110  |
| C | 2.8771729  | 0.0588697  | 0.5407826  |
| O | 0.4263037  | 1.1244148  | 1.7205739  |
| O | 1.7796538  | 0.3412973  | -0.2703688 |
| P | 0.2846806  | 0.2227945  | 0.3686602  |
| O | -0.6492258 | 0.8752646  | -0.6627766 |
| O | -0.0720704 | -1.1892600 | 0.8568225  |
| C | 4.5344530  | 6.0896175  | 1.5607688  |
| C | 5.2720080  | 4.8953367  | 1.3437004  |
| H | 2.5712472  | 6.9466441  | 1.8776787  |
| H | 5.0501186  | 7.0619712  | 1.5620099  |
| H | 5.2231550  | 2.7493182  | 1.1703469  |
| H | 6.3561515  | 4.9476924  | 1.1607290  |
| C | 5.7822573  | 1.0142728  | 4.3361203  |
| C | 6.5456334  | -0.1434858 | 4.0281769  |
| H | 4.1251809  | 2.2819361  | 3.7872287  |
| H | 6.0364121  | 1.6175074  | 5.2210294  |
| H | 7.3968819  | -0.4257093 | 4.6662396  |
| H | 6.7702671  | -1.8410563 | 2.7029019  |
| C | -1.7081468 | 3.9411522  | 0.3375335  |
| C | -1.1303601 | 3.4696368  | 1.5527094  |
| C | -3.1092032 | 3.9136992  | 0.2023344  |
| C | -1.9646772 | 2.9379283  | 2.5752346  |
| C | -3.3590418 | 2.9383302  | 2.3866078  |
| C | -3.9567424 | 3.4361990  | 1.2142864  |
| H | -3.5628524 | 4.2815883  | -0.7318790 |
| C | -1.4005077 | 2.4060111  | 3.8914442  |
| H | -4.0009073 | 2.5492956  | 3.1934923  |
| C | -1.7915274 | 0.9365428  | 4.1337326  |
| H | -2.8905460 | 0.8152213  | 4.2326467  |
| H | -1.3310757 | 0.5591149  | 5.0697433  |
| H | -1.4461044 | 0.2887826  | 3.3038630  |
| C | -1.8128117 | 3.3029596  | 5.0738340  |
| H | -0.2943296 | 2.4461172  | 3.8276195  |
| H | -2.9139301 | 3.3064054  | 5.2153892  |
| H | -1.4919524 | 4.3521248  | 4.9119504  |
| H | -1.3537350 | 2.9442112  | 6.0183073  |
| C | -5.4718510 | 3.5153762  | 1.0631312  |
| C | -6.1688586 | 2.1568460  | 1.2427919  |
| H | -7.2657409 | 2.2582957  | 1.1108976  |

|    |            |            |            |
|----|------------|------------|------------|
| H  | -5.9926924 | 1.7358720  | 2.2547782  |
| H  | -5.8035203 | 1.4129571  | 0.5084702  |
| C  | -6.0574930 | 4.5687441  | 2.0231799  |
| H  | -5.6723809 | 3.8592247  | 0.0246104  |
| H  | -7.1506495 | 4.6827560  | 1.8687764  |
| H  | -5.5818829 | 5.5587198  | 1.8720388  |
| H  | -5.8945601 | 4.2760832  | 3.0817780  |
| C  | -0.8720656 | 4.4994593  | -0.8163556 |
| C  | -1.1994161 | 3.8499510  | -2.1720509 |
| H  | -0.5520364 | 4.2736846  | -2.9667807 |
| H  | -2.2525700 | 4.0142856  | -2.4785581 |
| H  | -1.0209620 | 2.7599013  | -2.1413549 |
| C  | -1.0132839 | 6.0322455  | -0.8981008 |
| H  | 0.1918500  | 4.2731192  | -0.6031300 |
| H  | -0.3649093 | 6.4454247  | -1.6983378 |
| H  | -0.7338783 | 6.5223005  | 0.0564326  |
| H  | -2.0601655 | 6.3230970  | -1.1264936 |
| H  | 0.4714085  | -5.4077396 | -3.1454969 |
| H  | 4.5184328  | -1.2365680 | -4.3969634 |
| H  | 3.7277418  | -5.3130208 | 2.2085601  |
| C  | 0.9765151  | -4.5980120 | -3.7167732 |
| H  | 3.0206885  | 1.5026327  | -3.6494042 |
| H  | -0.7010355 | -4.5118846 | -5.1236671 |
| H  | 1.2850285  | -4.6708103 | 2.6454702  |
| C  | 1.6929314  | -3.7226297 | -2.6968529 |
| C  | 4.7896263  | -0.6658184 | -3.4840799 |
| C  | -0.1097147 | -3.8255942 | -4.4831865 |
| H  | 0.3249089  | -3.0446291 | -5.1402549 |
| C  | 2.2554414  | -2.4862860 | -3.0599147 |
| C  | 3.6264013  | -4.9643847 | 1.1597876  |
| H  | 2.7351471  | -5.8573724 | -4.1276456 |
| C  | 1.8286274  | -4.1333842 | -1.3612838 |
| C  | 1.9794496  | -5.2617774 | -4.6788833 |
| H  | 1.4596001  | -5.9362568 | -5.3909071 |
| H  | 1.4063147  | -5.1077365 | -1.0666263 |
| C  | 2.5477282  | 0.5342561  | -3.3855592 |
| H  | 5.2846109  | 0.2735465  | -3.8072735 |
| H  | 5.5290834  | -1.2684399 | -2.9182899 |
| C  | 2.9120604  | -1.6608482 | -2.1319534 |
| C  | 1.1957381  | -4.3732243 | 1.5806437  |
| C  | 2.4636877  | -3.3416222 | -0.3840350 |
| H  | 4.6178281  | -4.6011631 | 0.8205311  |
| H  | 3.3655248  | -5.8436103 | 0.5336938  |
| C  | 3.5439961  | -0.3609698 | -2.6289365 |
| C  | 3.0064378  | -2.0835742 | -0.7736066 |
| C  | 2.5461908  | -3.8708640 | 1.0475002  |
| H  | 1.6511254  | 0.7459177  | -2.7723026 |
| H  | 0.4205441  | -3.5877093 | 1.5170550  |
| H  | 2.2010133  | 0.0665348  | -4.3296731 |
| H  | -0.8044891 | -3.3138995 | -3.7898363 |
| H  | 0.8251662  | -5.2614264 | 1.0272640  |
| H  | 2.5222380  | -4.4968998 | -5.2733463 |
| H  | 3.8968718  | 0.2089785  | -1.7455269 |
| H  | 2.8517855  | -3.0288752 | 1.7006096  |
| H  | 2.1753937  | -2.1467733 | -4.1041957 |
| Zn | -1.6096773 | 0.0978714  | -2.1515140 |
| Br | -1.3379106 | 0.0414065  | -4.4367849 |
| C  | -2.8736594 | -6.8080678 | -2.0267304 |
| C  | -3.0000637 | -2.5133002 | -1.9849612 |
| C  | -1.8782437 | -6.0825648 | -1.3518836 |
| C  | -3.9626199 | -4.7276921 | -2.6560607 |
| C  | -2.9763108 | -3.9889915 | -1.9601293 |
| C  | -3.9145860 | -6.1255939 | -2.6841063 |
| C  | -1.9276519 | -4.6836730 | -1.3160042 |
| O  | -2.0145375 | -1.8410067 | -1.4191687 |
| H  | -2.8344241 | -7.9077629 | -2.0514746 |
| H  | -4.7672952 | -4.1998942 | -3.1909539 |
| H  | -1.0525766 | -6.6089748 | -0.8492698 |
| H  | -4.6867309 | -6.6893794 | -3.2291107 |
| H  | -1.1211563 | -4.1228779 | -0.8235610 |
| Br | -2.5769276 | -3.7499158 | 1.9550248  |

|    |            |            |            |
|----|------------|------------|------------|
| Zn | -1.8864610 | -1.9262650 | 0.6579041  |
| H  | -5.7654939 | -2.2158546 | -2.9135709 |
| H  | -3.8632156 | -1.0169905 | 1.7250136  |
| C  | -4.8636140 | -1.9923996 | -0.8886644 |
| C  | -5.7716924 | -1.5691717 | -2.0132154 |
| H  | -5.0611266 | -2.8941918 | -0.2905546 |
| C  | -4.2955612 | -0.8043732 | -0.3692389 |
| C  | -3.5795005 | -0.5011924 | 0.7924149  |
| C  | -4.3144371 | 0.1160314  | -1.5452460 |
| O  | -5.2518079 | -0.2747860 | -2.4253380 |
| O  | -3.5341066 | 1.0429609  | -1.7904319 |
| H  | -6.8275747 | -1.4404506 | -1.6894900 |
| H  | -3.1819301 | 0.5240444  | 0.8893272  |
| H  | -3.4155487 | -2.0602470 | -2.9103934 |

### TS1-8d-2

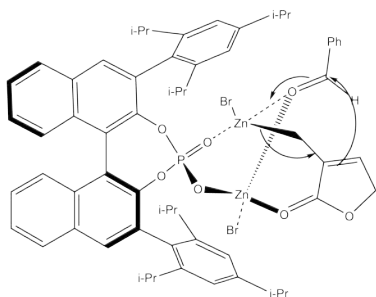

Energy(Hartree)= -11970.01332442  
number of imaginary frequencies: 1

|   |            |            |            |
|---|------------|------------|------------|
| C | 1.1348267  | 2.3290925  | 1.6713942  |
| C | 2.5332091  | 2.2936806  | 1.6160411  |
| C | 3.2315966  | 3.5585472  | 1.5732993  |
| C | 4.6369968  | 3.6643861  | 1.3455292  |
| C | 2.4758656  | 4.7796776  | 1.7284060  |
| C | 3.1629450  | 6.0307439  | 1.7336275  |
| C | 1.0548826  | 4.7266849  | 1.8033827  |
| H | 0.4913286  | 5.6692964  | 1.8765353  |
| C | 0.3590180  | 3.5270292  | 1.7120053  |
| C | 3.5618403  | -1.1591145 | 0.2642110  |
| C | 4.6920359  | -1.4272337 | 1.0274627  |
| H | 5.2736169  | -2.3399600 | 0.8277714  |
| C | 5.0924924  | -0.5795931 | 2.1015086  |
| C | 6.1990980  | -0.9232430 | 2.9348195  |
| C | 4.3502646  | 0.6275559  | 2.3822786  |
| C | 4.7161869  | 1.3957549  | 3.5275982  |
| C | 3.2530020  | 0.9896639  | 1.5169021  |
| C | 2.8742586  | 0.0629259  | 0.5401009  |
| O | 0.4249331  | 1.1308062  | 1.7194657  |
| O | 1.7778524  | 0.3467485  | -0.2707267 |
| P | 0.2825906  | 0.2271388  | 0.3685804  |
| O | -0.6509844 | 0.8806047  | -0.6625624 |
| O | -0.0703602 | -1.1855720 | 0.8550553  |
| C | 4.5353740  | 6.0931538  | 1.5504906  |
| C | 5.2719048  | 4.8985508  | 1.3355677  |
| H | 2.5730403  | 6.9513571  | 1.8659508  |
| H | 5.0512449  | 7.0653388  | 1.5497143  |
| H | 5.2211665  | 2.7520389  | 1.1659671  |
| H | 6.3560035  | 4.9498361  | 1.1523527  |
| C | 5.7862567  | 1.0221089  | 4.3288125  |
| C | 6.5461648  | -0.1378886 | 4.0234495  |
| H | 4.1306181  | 2.2912080  | 3.7781853  |
| H | 6.0433576  | 1.6278688  | 5.2110811  |
| H | 7.3979058  | -0.4201986 | 4.6607286  |
| H | 6.7639742  | -1.8400009 | 2.7036984  |
| C | -1.7123820 | 3.9432711  | 0.3407011  |

|   |            |            |            |
|---|------------|------------|------------|
| C | -1.1301305 | 3.4750733  | 1.5546993  |
| C | -3.1136320 | 3.9131365  | 0.2104539  |
| C | -1.9599259 | 2.9453732  | 2.5816537  |
| C | -3.3545723 | 2.9440862  | 2.3978977  |
| C | -3.9568125 | 3.4378912  | 1.2265338  |
| H | -3.5706045 | 4.2770429  | -0.7236030 |
| C | -1.3901390 | 2.4184798  | 3.8974625  |
| H | -3.9930267 | 2.5572374  | 3.2085978  |
| C | -1.7768914 | 0.9491551  | 4.1461770  |
| H | -2.8752343 | 0.8251677  | 4.2496755  |
| H | -1.3131686 | 0.5755106  | 5.0819744  |
| H | -1.4317500 | 0.2989439  | 3.3183924  |
| C | -1.7987751 | 3.3195130  | 5.0778250  |
| H | -0.2843161 | 2.4599923  | 3.8287214  |
| H | -2.8991823 | 3.3229113  | 5.2242740  |
| H | -1.4806737 | 4.3684423  | 4.9103675  |
| H | -1.3359864 | 2.9657135  | 6.0223032  |
| C | -5.4725898 | 3.5142150  | 1.0807472  |
| C | -6.1643534 | 2.1517711  | 1.2509041  |
| H | -7.2624079 | 2.2496867  | 1.1256689  |
| H | -5.9820328 | 1.7221302  | 2.2581089  |
| H | -5.7988168 | 1.4156585  | 0.5089981  |
| C | -6.0594155 | 4.5581849  | 2.0498559  |
| H | -5.6770106 | 3.8649916  | 0.0452055  |
| H | -7.1531263 | 4.6714770  | 1.8990842  |
| H | -5.5858146 | 5.5500066  | 1.9064893  |
| H | -5.8938727 | 4.2585068  | 3.1059349  |
| C | -0.8812222 | 4.5019101  | -0.8165441 |
| C | -1.2105790 | 3.8507872  | -2.1708036 |
| H | -0.5656700 | 4.2737458  | -2.9677480 |
| H | -2.2642587 | 4.0119492  | -2.4766636 |
| H | -1.0306632 | 2.7612034  | -2.1401752 |
| C | -1.0268308 | 6.0341757  | -0.8987248 |
| H | 0.1838909  | 4.2786573  | -0.6059714 |
| H | -0.3828880 | 6.4491104  | -1.7015077 |
| H | -0.7459081 | 6.5261322  | 0.0543007  |
| H | -2.0751231 | 6.3226798  | -1.1229469 |
| H | 0.4716760  | -5.4199056 | -3.1349017 |
| H | 4.5104766  | -1.2502678 | -4.3937440 |
| H | 3.7113358  | -5.3040394 | 2.2265274  |
| C | 0.9804046  | -4.6130467 | -3.7073455 |
| H | 3.0129189  | 1.4929568  | -3.6557685 |
| H | -0.6854716 | -4.5407120 | -5.1289558 |
| H | 1.2681685  | -4.6577583 | 2.6590630  |
| C | 1.6879376  | -3.7304041 | -2.6875494 |
| C | 4.7813993  | -0.6762446 | -3.4830158 |
| C | -0.1006285 | -3.8487997 | -4.4887102 |
| H | 0.3365137  | -3.0716596 | -5.1484058 |
| C | 2.2490741  | -2.4946845 | -3.0534509 |
| C | 3.6109625  | -4.9582993 | 1.1767477  |
| H | 2.7455601  | -5.8711554 | -4.0939551 |
| C | 1.8199319  | -4.1350339 | -1.3500086 |
| C | 1.9929215  | -5.2818612 | -4.6557232 |
| H | 1.4813051  | -5.9622482 | -5.3680152 |
| H | 1.3975759  | -5.1085065 | -1.0523893 |
| C | 2.5399961  | 0.5257443  | -3.3880579 |
| H | 5.2772328  | 0.2612726  | -3.8100696 |
| H | 5.5201897  | -1.2778275 | -2.9155920 |
| C | 2.9039442  | -1.6657903 | -2.1277619 |
| C | 1.1810839  | -4.3631172 | 1.5934228  |
| C | 2.4527957  | -3.3399946 | -0.3744526 |
| H | 4.6031346  | -4.5984989 | 0.8362792  |
| H | 3.3505499  | -5.8393524 | 0.5532519  |
| C | 3.5360056  | -0.3676515 | -2.6290842 |
| C | 2.9972516  | -2.0841234 | -0.7681905 |
| C | 2.5322470  | -3.8639680 | 1.0593303  |
| H | 1.6442222  | 0.7411848  | -2.7751189 |
| H | 0.4065668  | -3.5772999 | 1.5291183  |
| H | 2.1904700  | 0.0566479  | -4.3302877 |
| H | -0.8024108 | -3.3321530 | -3.8065613 |
| H | 0.8087685  | -5.2526759 | 1.0434286  |

|    |            |            |            |
|----|------------|------------|------------|
| H  | 2.5398450  | -4.5203388 | -5.2503907 |
| H  | 3.8895369  | 0.2047570  | -1.7474795 |
| H  | 2.8376443  | -3.0198260 | 1.7097550  |
| H  | 2.1695046  | -2.1582937 | -4.0986754 |
| Zn | -1.5974113 | 0.1045932  | -2.1611421 |
| Br | -1.3460181 | 0.0047959  | -4.4396981 |
| C  | -2.8826003 | -6.8030614 | -2.0869685 |
| C  | -2.9796761 | -2.5087144 | -1.9955795 |
| C  | -1.8975004 | -6.0936620 | -1.3817073 |
| C  | -3.9385168 | -4.7072840 | -2.7161841 |
| C  | -2.9638807 | -3.9841136 | -1.9885797 |
| C  | -3.9019227 | -6.1046568 | -2.7602283 |
| C  | -1.9355914 | -4.6951394 | -1.3302148 |
| O  | -2.0016999 | -1.8417858 | -1.4179716 |
| H  | -2.8520398 | -7.9026765 | -2.1235187 |
| H  | -4.7234226 | -4.1653141 | -3.2665034 |
| H  | -1.0884517 | -6.6313259 | -0.8644813 |
| H  | -4.6647781 | -6.6555674 | -3.3308367 |
| H  | -1.1365185 | -4.1473549 | -0.8125642 |
| Br | -2.6104340 | -3.7684823 | 1.9116074  |
| Zn | -1.8749910 | -1.9402927 | 0.6599851  |
| H  | -5.7534892 | -2.2168605 | -2.9029774 |
| H  | -3.8424306 | -1.0274556 | 1.7338041  |
| C  | -4.8506906 | -1.9962524 | -0.8801266 |
| C  | -5.7607935 | -1.5697689 | -2.0019853 |
| H  | -5.0357466 | -2.9030460 | -0.2855472 |
| C  | -4.2848146 | -0.8081340 | -0.3587522 |
| C  | -3.5697987 | -0.5042653 | 0.8023963  |
| C  | -4.3068643 | 0.1166391  | -1.5320181 |
| O  | -5.2486200 | -0.2753567 | -2.4120955 |
| O  | -3.5319730 | 1.0454511  | -1.7749827 |
| H  | -6.8185264 | -1.4461698 | -1.6787781 |
| H  | -3.1701601 | 0.5200224  | 0.8995007  |
| H  | -3.3957438 | -2.0426081 | -2.9150893 |

|   |            |            |            |
|---|------------|------------|------------|
| C | 3.0460956  | 1.1194985  | 1.8495851  |
| C | 2.7912553  | 0.1911100  | 0.8344009  |
| O | 0.2101384  | 1.1366263  | 1.8197469  |
| O | 1.7496793  | 0.4328518  | -0.0600630 |
| P | 0.2139347  | 0.2431474  | 0.4553635  |
| O | -0.6628404 | 0.8616425  | -0.6451221 |
| O | -0.1210947 | -1.1877268 | 0.9028065  |
| C | 4.0974011  | 6.2745327  | 2.0431832  |
| C | 4.9020131  | 5.1153007  | 1.8825519  |
| H | 2.0788562  | 7.0435999  | 2.1943534  |
| H | 4.5683101  | 7.2679531  | 2.0957952  |
| H | 4.9616591  | 2.9713445  | 1.6906171  |
| H | 5.9946078  | 5.2157428  | 1.7944239  |
| C | 5.3297775  | 1.2189463  | 4.8667421  |
| C | 6.1677245  | 0.1007729  | 4.6106074  |
| H | 3.6681731  | 2.4202041  | 4.1956876  |
| H | 5.4820729  | 1.8195130  | 5.7765002  |
| H | 6.9751234  | -0.1592929 | 5.3142943  |
| H | 6.5781319  | -1.5651174 | 3.2894572  |
| C | -1.8862591 | 3.8133497  | 0.2180225  |
| C | -1.4184130 | 3.3977149  | 1.5012438  |
| C | -3.2447201 | 3.6347779  | -0.0905120 |
| C | -2.3180059 | 2.8018077  | 2.4241828  |
| C | -3.6729975 | 2.6578138  | 2.0650447  |
| C | -4.1601692 | 3.0645790  | 0.8119613  |
| H | -3.6076688 | 3.9346020  | -1.0866456 |
| C | -1.8704415 | 2.3350749  | 3.8078354  |
| H | -4.3627468 | 2.2039030  | 2.7921005  |
| C | -2.1843446 | 0.8469780  | 4.0484053  |
| H | -3.2771039 | 0.6517644  | 4.0474366  |
| H | -1.7919238 | 0.5201241  | 5.0331862  |
| H | -1.7188656 | 0.2092000  | 3.2710849  |
| C | -2.4739836 | 3.2249613  | 4.9108548  |
| H | -0.7691520 | 2.4530091  | 3.8646750  |
| H | -3.5820327 | 3.1562888  | 4.9235013  |
| H | -2.2054634 | 4.2901149  | 4.7585094  |
| H | -2.1060960 | 2.9164603  | 5.9113914  |
| C | -5.6266204 | 2.9434984  | 0.4090441  |
| C | -6.4088666 | 1.8729793  | 1.1807909  |
| H | -7.4286700 | 1.7617005  | 0.7598332  |
| H | -6.5278081 | 2.1442266  | 2.2507267  |
| H | -5.9090079 | 0.8845394  | 1.1357259  |
| C | -6.3239970 | 4.3149565  | 0.5176357  |
| H | -5.6287936 | 2.6550749  | -0.6668242 |
| H | -7.3727156 | 4.2585672  | 0.1587060  |
| H | -5.7969093 | 5.0865218  | -0.0786529 |
| H | -6.3402948 | 4.6592584  | 1.5731079  |
| C | -0.9733003 | 4.4560438  | -0.8287192 |
| C | -1.0790855 | 3.8048612  | -2.2184819 |
| H | -0.3843848 | 4.2995003  | -2.9276443 |
| H | -2.0989496 | 3.8807079  | -2.6477945 |
| H | -0.8063368 | 2.7343823  | -2.1765800 |
| C | -1.2403217 | 5.9719042  | -0.9142221 |
| H | 0.0745003  | 4.3209685  | -0.4932404 |
| H | -0.5420118 | 6.4563871  | -1.6278036 |
| H | -1.1210324 | 6.4653938  | 0.0715117  |
| H | -2.2753431 | 6.1726619  | -1.2625300 |
| H | 0.9872900  | -5.3155440 | -3.1297702 |
| H | 4.9157257  | -0.9283392 | -3.9558872 |
| H | 3.7472502  | -5.1631201 | 2.4975848  |
| C | 1.5082668  | -4.4773370 | -3.6424729 |
| H | 3.2187530  | 1.7189226  | -3.3004135 |
| H | -0.0306031 | -4.4488795 | -5.2016841 |
| H | 1.2467906  | -4.6460221 | 2.7210886  |
| C | 2.0832665  | -3.5851664 | -2.5502741 |
| C | 5.0762281  | -0.3630121 | -3.0140332 |
| C | 0.4675692  | -3.7441998 | -4.5043960 |
| H | 0.9286721  | -2.9398909 | -5.1135019 |
| C | 2.6111593  | -2.3155755 | -2.8439930 |
| C | 3.7229739  | -4.8014915 | 1.4485881  |
| H | 3.3525628  | -5.6538527 | -3.8910978 |

### 7.2.4.3 to 15n-ma TS1-8-n; COSMO

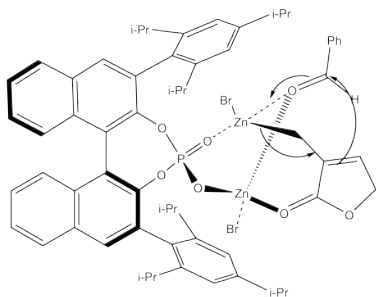

Energy(Hartree) = -11970.02615192

|   |           |            |           |
|---|-----------|------------|-----------|
| C | 0.8683682 | 2.3665431  | 1.8385695 |
| C | 2.2658088 | 2.3907179  | 1.9025309 |
| C | 2.9093668 | 3.6852258  | 1.9313683 |
| C | 4.3232865 | 3.8544654  | 1.8270652 |
| C | 2.0896415 | 4.8709477  | 2.0300626 |
| C | 2.7177727 | 6.1508628  | 2.1057531 |
| C | 0.6705407 | 4.7575786  | 1.9758061 |
| H | 0.0638900 | 5.6756980  | 1.9999114 |
| C | 0.0400277 | 3.5296842  | 1.8153210 |
| C | 3.5604558 | -0.9901354 | 0.5992073 |
| C | 4.6361049 | -1.2185567 | 1.4494888 |
| H | 5.2777004 | -2.0975073 | 1.2852031 |
| C | 4.9037387 | -0.3728916 | 2.5658243 |
| C | 5.9520876 | -0.6803582 | 3.4849078 |
| C | 4.0836514 | 0.7933416  | 2.7991091 |
| C | 4.3145530 | 1.5574439  | 3.9821443 |

|    |            |            |            |
|----|------------|------------|------------|
| C  | 2.1200450  | -4.0133756 | -1.2137257 |
| C  | 2.6284391  | -5.0841031 | -4.5080776 |
| H  | 2.2107324  | -5.7707476 | -5.2736781 |
| H  | 1.7235966  | -5.0128053 | -0.9719323 |
| C  | 2.7757991  | 0.7223045  | -3.0964455 |
| H  | 5.5493156  | 0.6058710  | -3.2774318 |
| H  | 5.7928353  | -0.9394135 | -2.3940544 |
| C  | 3.1399392  | -1.4761167 | -1.8493548 |
| C  | 1.2387986  | -4.3338992 | 1.6567323  |
| C  | 2.6239134  | -3.2091756 | -0.1723875 |
| H  | 4.7218926  | -4.3858215 | 1.2048822  |
| H  | 3.5622524  | -5.6810767 | 0.7901718  |
| C  | 3.7462995  | -0.1372640 | -2.2685834 |
| C  | 3.1348793  | -1.9192359 | -0.4943287 |
| C  | 2.6050643  | -3.7587506 | 1.2537759  |
| H  | 1.8186118  | 0.8748690  | -2.5623446 |
| H  | 0.4349860  | -3.5847291 | 1.5349600  |
| H  | 2.5387372  | 0.2580426  | -4.0755384 |
| H  | -0.3110179 | -3.2685280 | -3.8777099 |
| H  | 0.9627161  | -5.2283710 | 1.0599715  |
| H  | 3.1919849  | -4.2882848 | -5.0392065 |
| H  | 3.9902894  | 0.4320090  | -1.3488442 |
| H  | 2.8095349  | -2.9145451 | 1.9424291  |
| H  | 2.6063458  | -1.9607793 | -3.8862467 |
| Zn | -1.4399815 | 0.0736164  | -2.2309179 |
| Br | -0.9585752 | 0.0613053  | -4.4825232 |
| C  | -2.3145099 | -6.8982491 | -2.3690787 |
| C  | -2.6765976 | -2.6192335 | -2.2461427 |
| C  | -1.4434938 | -6.1432193 | -1.5664850 |
| C  | -3.4319050 | -4.8579630 | -3.0746903 |
| C  | -2.5739228 | -4.0907285 | -2.2508445 |
| C  | -3.3068538 | -6.2502584 | -3.1286311 |
| C  | -1.5707767 | -4.7501760 | -1.5051574 |
| O  | -1.7960349 | -1.9061536 | -1.5704244 |
| H  | -2.2142130 | -7.9934298 | -2.4138586 |
| H  | -4.1946891 | -4.3556860 | -3.6896774 |
| H  | -0.6544120 | -6.6416650 | -0.9830896 |
| H  | -3.9789329 | -6.8361037 | -3.7737357 |
| H  | -0.8570319 | -4.1644010 | -0.9099341 |
| Br | -2.5786681 | -3.9115881 | 1.6937123  |
| Zn | -1.8566672 | -2.0266687 | 0.5063963  |
| H  | -5.3640591 | -2.4736428 | -3.4285359 |
| H  | -3.9771634 | -1.2514793 | 1.3846230  |
| C  | -4.6772175 | -2.2329448 | -1.3235892 |
| C  | -5.4957345 | -1.8438157 | -2.5258509 |
| H  | -4.8727269 | -3.1572390 | -0.7602721 |
| C  | -4.2313842 | -1.0244987 | -0.7381782 |
| C  | -3.6427116 | -0.7022512 | 0.4886591  |
| C  | -4.1924542 | -0.0867262 | -1.8984352 |
| O  | -5.0158995 | -0.5144868 | -2.8705005 |
| O  | -3.4478176 | 0.8880592  | -2.0557566 |
| H  | -6.5838939 | -1.7821282 | -2.3057687 |
| H  | -3.3103076 | 0.3401251  | 0.6336256  |
| H  | -3.0298944 | -2.1647466 | -3.1962527 |

### TS1-8-n

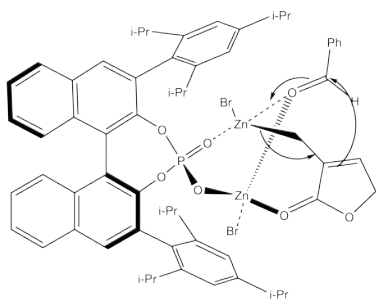

Energy(Hartree)= -11970.01385136  
number of imaginary frequencies: 1

|   |           |           |           |
|---|-----------|-----------|-----------|
| C | 0.8668366 | 2.3678132 | 1.8457418 |
|---|-----------|-----------|-----------|

|   |            |            |            |
|---|------------|------------|------------|
| C | 2.2644908  | 2.3905737  | 1.9097292  |
| C | 2.9096229  | 3.6843006  | 1.9389934  |
| C | 4.3236320  | 3.8517590  | 1.8358434  |
| C | 2.0918663  | 4.8711899  | 2.0373474  |
| C | 2.7222205  | 6.1493800  | 2.1144472  |
| C | 0.6730680  | 4.7593787  | 1.9806125  |
| H | 0.0665055  | 5.6776175  | 2.0021202  |
| C | 0.0408746  | 3.5327680  | 1.8193942  |
| C | 3.5530310  | -0.9886020 | 0.5976363  |
| C | 4.6305408  | -1.2187685 | 1.4448290  |
| H | 5.2703655  | -2.0982096 | 1.2763417  |
| C | 4.9016994  | -0.3761427 | 2.5622668  |
| C | 5.9517617  | -0.6852462 | 3.4781292  |
| C | 4.0831346  | 0.7900537  | 2.7997894  |
| C | 4.3181874  | 1.5519547  | 3.9831144  |
| C | 3.0433457  | 1.1186667  | 1.8538549  |
| C | 2.7848800  | 0.1923313  | 0.8376599  |
| O | 0.2062496  | 1.1402007  | 1.8294424  |
| O | 1.7412208  | 0.4355969  | -0.0526201 |
| P | 0.2067036  | 0.2433497  | 0.4669293  |
| O | -0.6726612 | 0.8609901  | -0.6319789 |
| O | -0.1225051 | -1.1875223 | 0.9162625  |
| C | 4.1015534  | 6.2712167  | 2.0538075  |
| C | 4.9040424  | 5.1112501  | 1.8932043  |
| H | 2.0844632  | 7.0430126  | 2.2023743  |
| H | 4.5737016  | 7.2639267  | 2.1075861  |
| H | 4.9599122  | 2.9672333  | 1.6996489  |
| H | 5.9968601  | 5.2097889  | 1.8063634  |
| C | 5.3355051  | 1.2116603  | 4.8639291  |
| C | 6.1714213  | 0.0935736  | 4.6040127  |
| H | 3.6727665  | 2.4148695  | 4.1984364  |
| H | 5.4908426  | 1.8109842  | 5.7739303  |
| H | 6.9805213  | -0.1621009 | 5.3049409  |
| H | 6.5761310  | -1.5704985 | 3.2796427  |
| C | -1.8772054 | 3.8143658  | 0.2129641  |
| C | -1.4164406 | 3.4031069  | 1.4998967  |
| C | -3.2341620 | 3.6364825  | -0.1009851 |
| C | -2.3208012 | 2.8120712  | 2.4207633  |
| C | -3.6739967 | 2.6683278  | 2.0557345  |
| C | -4.1544204 | 3.0713392  | 0.7991707  |
| H | -3.5915573 | 3.9312647  | -1.1005704 |
| C | -1.8795994 | 2.3512328  | 3.8083999  |
| H | -4.3679135 | 2.2189649  | 2.7816982  |
| C | -2.1938317 | 0.8643183  | 4.0545736  |
| H | -3.2864248 | 0.6680134  | 4.0491343  |
| H | -1.8071676 | 0.5419025  | 5.0429767  |
| H | -1.7228114 | 0.2227649  | 3.2840202  |
| C | -2.4873059 | 3.2470031  | 4.9041225  |
| H | -0.7784712 | 2.4691653  | 3.8687834  |
| H | -3.5953959 | 3.1798590  | 4.9124326  |
| H | -2.2181725 | 4.3111404  | 4.7472385  |
| H | -2.1246844 | 2.9439960  | 5.9082069  |
| C | -5.6193872 | 2.9536486  | 0.3900881  |
| C | -6.4064841 | 1.8824055  | 1.1558692  |
| H | -7.4254671 | 1.7738223  | 0.7320859  |
| H | -6.5295716 | 2.1509811  | 2.2259513  |
| H | -5.9080736 | 0.8932472  | 1.1108397  |
| C | -6.3146993 | 4.3258743  | 0.4996191  |
| H | -5.6173972 | 2.6674024  | -0.6863582 |
| H | -7.3622900 | 4.2738624  | 0.1367201  |
| H | -5.7831653 | 5.0980240  | -0.0915812 |
| H | -6.3336197 | 4.6679193  | 1.5555894  |
| C | -0.9580809 | 4.4509360  | -0.8321517 |
| C | -1.0605376 | 3.7972383  | -2.2208465 |
| H | -0.3600195 | 4.2857773  | -2.9283056 |
| H | -2.0772038 | 3.8763003  | -2.6568102 |
| H | -0.7932964 | 2.7256199  | -2.1764077 |
| C | -1.2196336 | 5.9674112  | -0.9219282 |
| H | 0.0879586  | 4.3131902  | -0.4921807 |
| H | -0.5181711 | 6.4483819  | -1.6346704 |
| H | -1.1021350 | 6.4632538  | 0.0627232  |



|    |            |            |            |
|----|------------|------------|------------|
| H  | -2.2529640 | 6.1713611  | -1.2730020 |
| H  | 0.9911887  | -5.3184725 | -3.1361708 |
| H  | 4.8896531  | -0.9123030 | -3.9631374 |
| H  | 3.7480426  | -5.1686431 | 2.4868577  |
| C  | 1.5079445  | -4.4763741 | -3.6470963 |
| H  | 3.1849063  | 1.7285767  | -3.2955903 |
| H  | -0.0277117 | -4.4566849 | -5.2098184 |
| H  | 1.2471901  | -4.6486832 | 2.7195552  |
| C  | 2.0763586  | -3.5821269 | -2.5532012 |
| C  | 5.0516937  | -0.3479889 | -3.0211201 |
| C  | 0.4640933  | -3.7497264 | -4.5104475 |
| H  | 0.9193157  | -2.9410439 | -5.1179298 |
| C  | 2.5971732  | -2.3095794 | -2.8450783 |
| C  | 3.7201987  | -4.8043240 | 1.4389259  |
| H  | 3.3608060  | -5.6400770 | -3.8931609 |
| C  | 2.1165302  | -4.0116629 | -1.2174883 |
| C  | 2.6335982  | -5.0753537 | -4.5108462 |
| H  | 2.2224991  | -5.7638307 | -5.2783003 |
| H  | 1.7251532  | -5.0133175 | -0.9765408 |
| C  | 2.7470232  | 0.7298542  | -3.0914961 |
| H  | 5.5207977  | 0.6225645  | -3.2852658 |
| H  | 5.7725890  | -0.9236324 | -2.4057414 |
| C  | 3.1246861  | -1.4698424 | -1.8504391 |
| C  | 1.2374353  | -4.3338803 | 1.6561904  |
| C  | 2.6186699  | -3.2076162 | -0.1755686 |
| H  | 4.7188752  | -4.3902361 | 1.1918184  |
| H  | 3.5572549  | -5.6824103 | 0.7792580  |
| C  | 3.7242813  | -0.1279619 | -2.2697418 |
| C  | 3.1248471  | -1.9156732 | -0.4964004 |
| C  | 2.6030626  | -3.7599290 | 1.2497037  |
| H  | 1.7918449  | 0.8786744  | -2.5530522 |
| H  | 0.4340003  | -3.5835639 | 1.5409156  |
| H  | 2.5056449  | 0.2682232  | -4.0706433 |
| H  | -0.3193901 | -3.2793315 | -3.8862015 |
| H  | 0.9569489  | -5.2267201 | 1.0590426  |
| H  | 3.1934007  | -4.2757093 | -5.0398141 |
| H  | 3.9705727  | 0.4402455  | -1.3499158 |
| H  | 2.8102792  | -2.9173359 | 1.9394652  |
| H  | 2.5875832  | -1.9523005 | -3.8863682 |
| Zn | -1.4460529 | 0.0764877  | -2.2212091 |
| Br | -0.9973835 | 0.0345823  | -4.4720341 |
| C  | -2.3005324 | -6.9006690 | -2.3932882 |
| C  | -2.6665066 | -2.6225493 | -2.2328544 |
| C  | -1.4365691 | -6.1528224 | -1.5775822 |
| C  | -3.4104984 | -4.8545980 | -3.0893543 |
| C  | -2.5603527 | -4.0941153 | -2.2517608 |
| C  | -3.2858517 | -6.2459977 | -3.1553300 |
| C  | -1.5632754 | -4.7604280 | -1.5048298 |
| O  | -1.7917786 | -1.9105452 | -1.5522206 |
| H  | -2.2005401 | -7.9954642 | -2.4465449 |
| H  | -4.1658659 | -4.3456805 | -3.7083928 |
| H  | -0.6535102 | -6.6552988 | -0.9897894 |
| H  | -3.9519070 | -6.8258388 | -3.8119772 |
| H  | -0.8548889 | -4.1805281 | -0.8981434 |
| Br | -2.5888216 | -3.9389490 | 1.6711711  |
| Zn | -1.8469896 | -2.0456328 | 0.5245910  |
| H  | -5.3550426 | -2.4901357 | -3.3972304 |
| H  | -3.9602291 | -1.2829985 | 1.4169628  |
| C  | -4.6637333 | -2.2558942 | -1.2945092 |
| C  | -5.4902611 | -1.8645144 | -2.4913090 |
| H  | -4.8428733 | -3.1856948 | -0.7346836 |
| C  | -4.2282887 | -1.0454349 | -0.7038029 |
| C  | -3.6419665 | -0.7224536 | 0.5224807  |
| C  | -4.2013951 | -0.0993403 | -1.8585034 |
| O  | -5.0278859 | -0.5311880 | -2.8307181 |
| O  | -3.4693440 | 0.8823401  | -2.0116172 |
| H  | -6.5796623 | -1.8160856 | 2.2691376  |
| H  | -3.3131255 | 0.3207130  | 0.6701627  |
| H  | -3.0210567 | -2.1604674 | -3.1797437 |

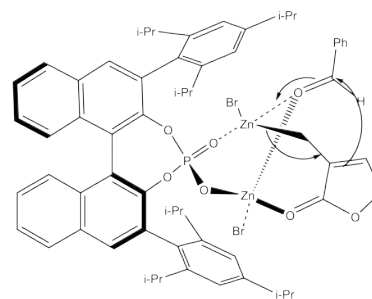

Energy(Hartree) = -11970.02621273

|    |            |            |            |
|----|------------|------------|------------|
| Zn | 2.1525313  | 1.2679430  | 0.8992060  |
| Br | 4.4132935  | 0.8368096  | 0.9461879  |
| H  | 3.4574700  | 5.8710136  | 0.3243148  |
| Br | -1.4005204 | 3.9613485  | -2.6711273 |
| H  | -1.4032384 | 4.1502583  | 0.3341888  |
| Zn | -0.3698286 | 2.5264176  | -1.1343054 |
| C  | 1.3662906  | 5.1635867  | 0.0273989  |
| C  | 2.4887277  | 5.7429889  | 0.8476303  |
| C  | 0.6729842  | 4.2703387  | 0.8796919  |
| C  | -0.5584238 | 3.6146098  | 0.7984526  |
| C  | 1.7277902  | 3.844231   | 1.8453732  |
| O  | 2.7079165  | 4.7613968  | 1.8985984  |
| O  | 1.8077375  | 2.7662547  | 2.4470528  |
| H  | 2.2219995  | 6.7137667  | 1.3194589  |
| H  | -0.7991536 | 2.8863417  | 1.5920181  |
| H  | 0.8944723  | 5.7261934  | -0.7916765 |
| C  | 2.1256605  | 3.8303862  | -4.8037835 |
| C  | 1.9177026  | 3.3754150  | -3.4958792 |
| C  | 2.5521360  | 4.0149056  | -2.4072350 |
| C  | 3.4162849  | 5.1063609  | -2.6624320 |
| C  | 3.6175004  | 5.5626805  | -3.9695731 |
| C  | 2.9670883  | 4.9288319  | -5.0449756 |
| H  | 1.6268672  | 3.1926250  | -5.6413344 |
| H  | 1.2938210  | 2.4880771  | -3.3215448 |
| C  | 2.3914158  | 3.5052689  | -1.0310030 |
| H  | 3.9468813  | 5.5920714  | -1.8288707 |
| H  | 4.2929336  | 6.4113895  | -4.1555737 |
| H  | 3.1275153  | 5.2862805  | -6.0735570 |
| O  | 1.6834532  | 2.4098373  | -0.8226279 |
| C  | -2.0428865 | -1.7503016 | 1.5844118  |
| C  | -2.0613277 | -3.0321795 | 1.0240025  |
| C  | -2.2074279 | -4.1518140 | 1.9272486  |
| C  | -2.0743214 | -5.5110039 | 1.5106177  |
| C  | -2.4610291 | -3.8929069 | 3.3259345  |
| C  | -2.6540744 | -4.9918744 | 4.2166813  |
| C  | -2.4415298 | -2.5544050 | 3.8135709  |
| H  | -2.5841373 | -2.3802623 | 4.8910340  |
| C  | -2.1706301 | -1.4760211 | 2.9801347  |
| C  | -0.3578028 | -2.8322620 | -2.4207046 |
| C  | -1.1397788 | -3.7080806 | -3.1649006 |
| H  | -0.8598645 | -3.9319071 | -4.2054806 |
| C  | -2.3302723 | -4.2869912 | -2.6353537 |
| C  | -3.1736632 | -5.1033146 | -3.4481450 |
| C  | -2.7166759 | -4.0181587 | -1.2695377 |
| C  | -3.9663777 | -4.5286205 | -0.8066777 |
| C  | -1.8449468 | -3.2194208 | -0.4409927 |
| C  | -0.7456989 | -2.6167292 | -1.0623067 |
| O  | -1.9170974 | -0.6429586 | 0.7454781  |
| O  | 0.0794510  | -1.7779202 | -0.3147474 |
| P  | -0.4681997 | -0.2943266 | 0.0832319  |
| O  | 0.5303256  | 0.2404544  | 1.1222382  |
| O  | -0.7770005 | 0.6017272  | -1.1255936 |
| C  | -2.5595034 | -6.3004613 | 3.7680258  |
| C  | -2.2470262 | -6.5574638 | 2.4066543  |
| H  | -2.8600121 | -4.7767819 | 5.2770249  |
| H  | -2.7040189 | -7.1383747 | 4.4668912  |

## 7.2.4.4 to 15j-ma

TS1-8-j; COSMO

|   |            |            |            |
|---|------------|------------|------------|
| H | -1.8215523 | -5.7302733 | 0.4646272  |
| H | -2.1337395 | -7.5953158 | 2.0579022  |
| C | -4.7732129 | -5.3024823 | -1.6299944 |
| C | -4.3688080 | -5.6075900 | -2.9571462 |
| H | -4.2942098 | -4.2930048 | 0.2155070  |
| H | -5.7365190 | -5.6774804 | -1.2519039 |
| H | -5.0123837 | -6.2292535 | -3.5980762 |
| H | -2.8624263 | -5.3109134 | -4.4840252 |
| C | -0.6733250 | 0.1391591  | 4.2008062  |
| C | -1.8918003 | -0.0976144 | 3.4955430  |
| C | -0.3924288 | 1.4451173  | 4.6343821  |
| C | -2.7772540 | 0.9800024  | 3.2297058  |
| C | -2.4491434 | 2.2681070  | 3.6977191  |
| C | -1.2610616 | 2.5262097  | 4.4011422  |
| H | 0.5552690  | 1.6383554  | 5.1619181  |
| C | -4.0897567 | 0.7843599  | 2.4735305  |
| H | -3.1473331 | 3.0937432  | 3.4942245  |
| C | -4.1826103 | 1.6865445  | 1.2292172  |
| H | -4.1918247 | 2.7627167  | 1.5013377  |
| H | -5.1166507 | 1.4806130  | 0.6672730  |
| H | -3.3302888 | 1.5111717  | 0.5434006  |
| C | -5.2984516 | 0.9840387  | 3.4072009  |
| H | -4.1236156 | -0.2668391 | 2.1216760  |
| H | -5.3395625 | 2.0224543  | 3.7978656  |
| H | -5.2497337 | 0.2994434  | 4.2783328  |
| H | -6.2489314 | 0.7891931  | 2.8685228  |
| C | -0.8969946 | 3.9050141  | 4.9429670  |
| C | -1.5694473 | 5.0719396  | 4.2081958  |
| H | -1.1724135 | 6.0397249  | 4.5760908  |
| H | -2.6663397 | 5.0859009  | 4.3787043  |
| H | -1.3980233 | 5.0238869  | 3.1140534  |
| C | -1.1832680 | 3.9745389  | 6.4569081  |
| H | 0.2037691  | 4.0094759  | 4.8087854  |
| H | -0.8570567 | 4.9473315  | 6.8801651  |
| H | -0.6591819 | 3.1668730  | 7.0061785  |
| H | -2.2706389 | 3.8625928  | 6.6516545  |
| C | 0.3314310  | -0.9719996 | 4.5137086  |
| C | 1.7777248  | -0.6192770 | 4.1258664  |
| H | 2.4536617  | -1.4686354 | 4.3535542  |
| H | 2.1621523  | 0.2649326  | 4.6741141  |
| H | 1.8585873  | -0.4099577 | 3.0433893  |
| C | 0.2467902  | -1.3680945 | 6.0011038  |
| H | 0.0494550  | -1.8614756 | 3.9153359  |
| H | 0.9305269  | -2.2131354 | 6.2245559  |
| H | -0.7803378 | -1.6727176 | 6.2866992  |
| H | 0.5338709  | -0.5170681 | 6.6540030  |
| H | 3.6974304  | 1.2686762  | -4.8651786 |
| H | 4.2196333  | -4.1180813 | -2.4061467 |
| H | -1.7893418 | -1.2725929 | -6.4986485 |
| C | 4.1405447  | 0.4447056  | -4.2637881 |
| H | 3.2214768  | -3.6550675 | 0.6124994  |
| H | 5.6271983  | 1.8241311  | -3.4355618 |
| H | -2.1756440 | 0.7892039  | -5.0240795 |
| C | 2.9851341  | -0.4390417 | -3.8127400 |
| C | 3.2315277  | -4.4919539 | -2.0649323 |
| C | 4.8814307  | 1.0844784  | -3.0784032 |
| H | 5.4226491  | 0.3286640  | -2.4730050 |
| C | 3.1647313  | -1.4426439 | -2.8446243 |
| C | -0.7869633 | -1.4051941 | -6.0410574 |
| H | 4.5808700  | -0.7521830 | -6.0588158 |
| C | 1.7038848  | -0.2899111 | -4.3668534 |
| C | 5.1069262  | -0.3322604 | -5.1775804 |
| H | 5.9229926  | 0.3255944  | -5.5429040 |
| H | 1.5527035  | 0.4824436  | -5.1383395 |
| C | 3.1050977  | -2.8409902 | -0.1323933 |
| H | 3.4122460  | -5.3224281 | -1.3511585 |
| H | 2.7051260  | -4.9054247 | -2.9492544 |
| C | 2.1099098  | -2.2637072 | -2.4122854 |
| C | -1.1520118 | 0.6616159  | -4.6162660 |
| C | 0.6053494  | -1.0737554 | -3.9620218 |
| H | -0.5451067 | -2.4874834 | -6.0494989 |

|   |            |            |            |
|---|------------|------------|------------|
| H | -0.0463557 | -0.8967793 | -6.6938236 |
| C | 2.4118598  | -3.3685359 | -1.4002990 |
| C | 0.8099107  | -2.0703117 | -2.9648715 |
| C | -0.7535939 | -0.8221123 | -4.6149654 |
| H | 2.5196166  | -2.0276201 | 0.3368396  |
| H | -1.1458637 | 1.0808996  | -3.5933073 |
| H | 4.1170216  | -2.4404774 | -0.3465753 |
| H | 4.1793466  | 1.6019348  | -2.3967902 |
| H | -0.4757231 | 1.2815075  | -5.2413194 |
| H | 5.5739565  | -1.1778803 | -4.6300182 |
| H | 1.4488499  | -3.8206290 | -1.0875581 |
| H | -1.5188827 | -1.3556582 | -4.0164034 |
| H | 4.1628218  | -1.5899640 | -2.4038632 |
| H | 3.2789303  | 3.6287475  | -0.3742252 |

### TS1-8-j

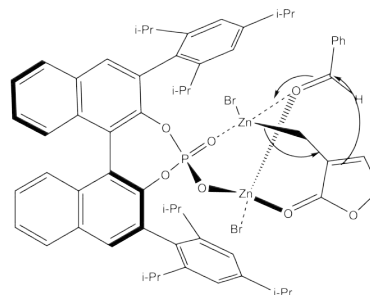

Energy(Hartree) = -11970.01388455  
number of imaginary frequencies: 1

|    |            |            |            |
|----|------------|------------|------------|
| Zn | 2.1457467  | 1.2681590  | 0.9042109  |
| Br | 4.4054556  | 0.8653930  | 0.9332999  |
| H  | 3.4261974  | 5.8790736  | 0.3128789  |
| Br | -1.3728583 | 3.9804171  | -2.6879273 |
| H  | -1.4286549 | 4.1443118  | 0.3046643  |
| Zn | -0.3828695 | 2.5252015  | -1.1537511 |
| C  | 1.3388797  | 5.1675848  | 0.0107811  |
| C  | 2.4561698  | 5.7509818  | 0.8354409  |
| C  | 0.6441700  | 4.2763552  | 0.8632351  |
| C  | -0.5850059 | 3.6174673  | 0.7803488  |
| C  | 1.6954877  | 3.8538821  | 1.8355277  |
| O  | 2.6741412  | 4.7781260  | 1.8902965  |
| O  | 1.7748910  | 2.7813724  | 2.4407782  |
| H  | 2.1881272  | 6.7253155  | 1.3016200  |
| H  | -0.8263062 | 2.8893503  | 1.5738589  |
| H  | 0.8709700  | 5.7185525  | -0.8184785 |
| C  | 2.1410491  | 3.8382866  | -4.8093694 |
| C  | 1.9207778  | 3.3790219  | -3.5052537 |
| C  | 2.5606913  | 4.0026400  | -2.4109124 |
| C  | 3.4433992  | 5.0807817  | -2.6582037 |
| C  | 3.6570797  | 5.5412815  | -3.9613511 |
| C  | 3.0002763  | 4.9240065  | -5.0419166 |
| H  | 1.6348420  | 3.3401452  | -5.6500899 |
| H  | 1.2816028  | 2.5016371  | -3.3382858 |
| C  | 2.3862385  | 3.4923398  | -1.0374229 |
| H  | 3.9810707  | 5.5504214  | -1.8196874 |
| H  | 4.3476199  | 6.3791825  | -4.1406208 |
| H  | 3.1698034  | 5.2846962  | -6.0678631 |
| O  | 1.6701621  | 2.4069212  | -0.8266534 |
| C  | -2.0482719 | -1.7495359 | 1.5845134  |
| C  | -2.0658400 | -3.0316067 | 1.0240468  |
| C  | -2.2102976 | -4.1517758 | 1.9268198  |
| C  | -2.0772205 | -5.5104561 | 1.5092175  |
| C  | -2.4624160 | -3.8943330 | 3.3258206  |
| C  | -2.6536792 | -4.9941206 | 4.2151548  |
| C  | -2.4426281 | -2.5562817 | 3.8136355  |

|   |            |            |            |   |            |            |            |
|---|------------|------------|------------|---|------------|------------|------------|
| H | -2.5822953 | -2.3815767 | 4.8913971  | H | 5.6339437  | 1.8235353  | -3.4415096 |
| C | -2.1736909 | -1.4771150 | 2.9809954  | H | -2.1774352 | 0.7918668  | -5.0242183 |
| C | -0.3583237 | -2.8279066 | -2.4177506 | C | 2.9844359  | -0.4339659 | -3.8078931 |
| C | -1.1379776 | -3.7047383 | -3.1628269 | C | 3.2312759  | -4.4826656 | -2.0541740 |
| H | -0.8555982 | -3.9265466 | -4.2031632 | C | 4.8868268  | 1.0869956  | -3.0809824 |
| C | -2.3280168 | -4.2861673 | -2.6357261 | H | 5.4275651  | 0.3326886  | -2.4735462 |
| C | -3.1687121 | -5.1040587 | -3.4489058 | C | 3.1629717  | -1.4355339 | -2.8379588 |
| C | -2.7167163 | -4.0185858 | -1.2705479 | C | -0.7842775 | -1.4023546 | -6.0378613 |
| C | -3.9653802 | -4.5324487 | -0.8094654 | H | 4.5746463  | -0.7586244 | -6.0544525 |
| C | -1.8479982 | -3.2183313 | -0.4406972 | C | 1.7035156  | -0.2853631 | -4.3622270 |
| C | -0.7487011 | -2.6135041 | -1.0598462 | C | 5.1035554  | -0.3368118 | -5.1760379 |
| O | -1.9251216 | -0.6419621 | 0.7469876  | H | 5.9214687  | 0.3166597  | -5.5449430 |
| O | 0.0733686  | -1.7738823 | -0.3113490 | H | 1.5526681  | 0.4859023  | -5.1348971 |
| P | -0.4769512 | -0.2899278 | 0.0840051  | C | 3.1011606  | -2.8293850 | -0.1233557 |
| O | 0.5190898  | 0.2465182  | 1.1244400  | H | 3.4127115  | -5.3123312 | -1.3397226 |
| O | -0.7846454 | 0.6011993  | -1.1278616 | H | 2.7065099  | -4.8972199 | -2.9387432 |
| C | -2.5593508 | -6.3018839 | 3.7657382  | C | 2.1083641  | -2.2563617 | -2.4055989 |
| C | -2.2486660 | -6.5573545 | 2.4042909  | C | -1.1543241 | 0.6648721  | -4.6154176 |
| H | -2.8579355 | -4.7798552 | 5.2759910  | C | 0.6048107  | -1.0686451 | -3.9577743 |
| H | -2.7025837 | -7.1402496 | 4.4642428  | H | -0.5401720 | -2.4840672 | -6.0458196 |
| H | -1.8258632 | -5.7277084 | 0.4625802  | H | -0.0429895 | -0.8945084 | -6.6901016 |
| H | -2.1355667 | -7.5947497 | 2.0542876  | C | 2.4102254  | -3.3592530 | -1.3915019 |
| C | -4.7689665 | -5.3081662 | -1.6334783 | C | 0.8091066  | -2.0644044 | -2.9600394 |
| C | -4.3626382 | -5.6116215 | -2.9597948 | C | -0.7536733 | -0.8180960 | -4.6122882 |
| H | -4.2935981 | -4.2977579 | 0.2127076  | H | 2.5144661  | -2.0162737 | 0.3445137  |
| H | -5.7314856 | -5.6859142 | -1.2562693 | H | -1.1520042 | 1.0855640  | -3.5932452 |
| H | -5.0037740 | -6.2346018 | -3.6018024 | H | 4.1129632  | -2.4273843 | -0.3346151 |
| H | -2.8558796 | -5.3100435 | -4.4846180 | H | 4.1889441  | 1.6080280  | -2.3981151 |
| C | -0.6705756 | 0.1342033  | 4.1984908  | H | -0.4789731 | 1.2861288  | -5.2401521 |
| C | -1.8918680 | -0.1000054 | 3.4976793  | H | 5.5685883  | -1.1824840 | -4.6272216 |
| C | -0.3860187 | 1.4394764  | 4.6307047  | H | 1.4471770  | -3.8119291 | -1.0795753 |
| C | -2.7766453 | 0.9787090  | 3.2356972  | H | -1.5192147 | -1.3517155 | -4.0141166 |
| C | -2.4448681 | 2.2658601  | 3.7029684  | H | 4.1602557  | -1.5810995 | -2.3950067 |
| C | -1.2538074 | 2.5216145  | 4.4016090  | H | 3.2662924  | 3.6176200  | -0.3698296 |
| H | 0.5648716  | 1.6312632  | 5.1529321  |   |            |            |            |
| C | -4.0927821 | 0.7842846  | 2.4855980  |   |            |            |            |
| H | -3.1431675 | 3.0923544  | 3.5033349  |   |            |            |            |
| C | -4.1908701 | 1.6850648  | 1.2409133  |   |            |            |            |
| H | -4.1982302 | 2.7616831  | 1.5114820  |   |            |            |            |
| H | -5.1276800 | 1.4801742  | 0.6834204  |   |            |            |            |
| H | -3.3430958 | 1.5075055  | 0.5503712  |   |            |            |            |
| C | -5.2963295 | 0.9847997  | 3.4254685  |   |            |            |            |
| H | -4.1286230 | -0.2670812 | 2.1344107  |   |            |            |            |
| H | -5.3350209 | 2.0229510  | 3.8168131  |   |            |            |            |
| H | -5.2431928 | 0.3009955  | 4.2967125  |   |            |            |            |
| H | -6.2502074 | 0.7908102  | 2.8925971  |   |            |            |            |
| C | -0.8854143 | 3.8989488  | 4.9441613  |   |            |            |            |
| C | -1.5565847 | 5.0682666  | 4.2120767  |   |            |            |            |
| H | -1.1578841 | 6.0353768  | 4.5800704  |   |            |            |            |
| H | -2.6529210 | 5.0849541  | 4.3853756  |   |            |            |            |
| H | -1.3884668 | 5.0209105  | 3.1174338  |   |            |            |            |
| C | -1.1682450 | 3.9675720  | 6.4585900  |   |            |            |            |
| H | 0.2152699  | 4.0009376  | 4.8070102  |   |            |            |            |
| H | -0.8393294 | 4.9387154  | 6.8835628  |   |            |            |            |
| H | -0.6458138 | 3.1575283  | 7.0054885  |   |            |            |            |
| H | -2.2551328 | 3.8569080  | 6.6556735  |   |            |            |            |
| C | 0.3335494  | -0.9784926 | 4.5080226  |   |            |            |            |
| C | 1.7791020  | -0.6294084 | 4.1145851  |   |            |            |            |
| H | 2.4545748  | -1.4795582 | 4.3400523  |   |            |            |            |
| H | 2.1690944  | 0.2543624  | 4.6593609  |   |            |            |            |
| H | 1.8575154  | -0.4216578 | 3.0317919  |   |            |            |            |
| C | 0.2532187  | -1.3729867 | 5.9960054  |   |            |            |            |
| H | 0.0474049  | -1.8679874 | 3.9116651  |   |            |            |            |
| H | 0.9358281  | -2.2190844 | 6.2185186  |   |            |            |            |
| H | -0.7734138 | -1.6746860 | 6.2861361  |   |            |            |            |
| H | 0.5437579  | -0.5222732 | 6.6475704  |   |            |            |            |
| H | 3.6998315  | 1.2694530  | -4.8656834 |   |            |            |            |
| H | 4.2191744  | -4.1087316 | -2.3954475 |   |            |            |            |
| H | -1.7856951 | -1.2714577 | -6.4979433 |   |            |            |            |
| C | 4.1414990  | 0.4457172  | -4.2625808 |   |            |            |            |
| H | 3.2173672  | -3.6418996 | 0.6231231  |   |            |            |            |

### 7.2.4.5 to 15o-ma TS1-8-o; COSMO

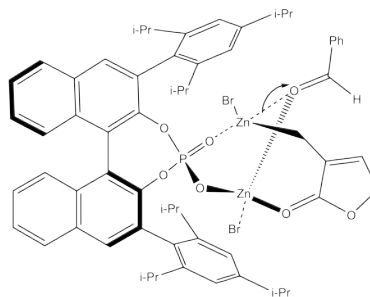

Energy(Hartree) = -11970.03844782

|    |            |           |            |
|----|------------|-----------|------------|
| Zn | 2.7431148  | 1.0438682 | 0.8458810  |
| Br | 4.9511147  | 0.7006529 | 0.2591669  |
| H  | 1.9313901  | 6.1220841 | 1.1186878  |
| Br | -2.3822538 | 4.3629694 | -0.4271883 |
| H  | -1.6128396 | 3.1750805 | 3.0614624  |
| Zn | -1.3065197 | 2.5499229 | 0.6268935  |
| C  | 0.3691691  | 5.1680936 | 2.3151355  |
| C  | 1.7701523  | 5.6367945 | 2.1086581  |
| C  | 0.3558020  | 3.8041408 | 2.4516012  |
| C  | -0.7126649 | 2.8077668 | 2.5331769  |
| C  | 1.7681005  | 3.3838790 | 2.3487881  |
| O  | 2.5799443  | 4.4429374 | 2.1452611  |
| O  | 2.2242733  | 2.2319514 | 2.4179671  |
| H  | 2.1512427  | 6.3301746 | 2.8915237  |
| H  | -0.3606170 | 1.8561612 | 2.9707554  |
| H  | -0.5046579 | 5.8322796 | 2.2904203  |

|   |            |            |            |   |            |            |            |
|---|------------|------------|------------|---|------------|------------|------------|
| C | 0.5884218  | 6.0847711  | -2.3572570 | C | 0.8677122  | 1.2825952  | 7.6844288  |
| C | 0.9842849  | 4.8985589  | -1.7358497 | H | 1.7652671  | 2.0628137  | 5.8854052  |
| C | 2.3617614  | 4.6108030  | -1.5848613 | H | 1.2199445  | 2.1069481  | 8.3391561  |
| C | 3.3368013  | 5.5188106  | -2.0634201 | H | 1.5752755  | 0.4353155  | 7.7853381  |
| C | 2.9335387  | 6.7054388  | -2.6853008 | H | -0.1182397 | 0.9411415  | 8.0637445  |
| C | 1.5613960  | 6.9850524  | -2.8332022 | C | 2.1991454  | -2.3875771 | 3.7113408  |
| H | -0.4855391 | 6.3008106  | -2.4623100 | C | 3.3910230  | -1.7018054 | 3.0310272  |
| H | 0.2274758  | 4.1930189  | -1.3622113 | H | 4.2042601  | -2.4301409 | 2.8350573  |
| C | 2.7908344  | 3.3777431  | -0.9385917 | H | 3.8273121  | -0.8845220 | 3.6406498  |
| H | 4.4059336  | 5.2806509  | -1.9455135 | H | 3.0945279  | -1.2799574 | 2.0526453  |
| H | 3.6849565  | 7.4157833  | -3.0611187 | C | 2.6458339  | -3.1690873 | 4.9632009  |
| H | 1.2472575  | 7.9179795  | -3.3268330 | H | 1.8035320  | -3.1254295 | 2.9861737  |
| O | 1.9968750  | 2.5684102  | -0.4234146 | H | 3.4172553  | -3.9231505 | 4.7027414  |
| C | -0.9590500 | -2.4737456 | 1.3925351  | H | 1.7951643  | -3.6967481 | 5.4409450  |
| C | -1.1420575 | -3.4453884 | 0.4023820  | H | 3.0812021  | -2.4890847 | 5.7252094  |
| C | -0.8665520 | -4.8215817 | 0.7492439  | H | 0.9974027  | 3.3300664  | -6.0462079 |
| C | -0.8325346 | -5.8736524 | -0.2150966 | H | 2.9735656  | -2.1893638 | -5.4441789 |
| C | -0.5787318 | -5.1528521 | 2.1243367  | H | -4.5035285 | 0.6593225  | -4.9750425 |
| C | -0.3452802 | -6.5144796 | 2.4823311  | C | 1.7417639  | 2.5282531  | -5.8440266 |
| C | -0.4770852 | -4.1129479 | 3.0910204  | H | 3.5131302  | -2.5684012 | -2.3188512 |
| H | -0.2357145 | -4.3766022 | 4.1323165  | H | 3.3315232  | 3.9993482  | -5.4739663 |
| C | -0.6016039 | -2.7731119 | 2.7447884  | H | -3.8877288 | 2.2154042  | -2.9905882 |
| C | -1.1488219 | -1.7536362 | -3.0574168 | C | 0.9984738  | 1.4124233  | -5.1204056 |
| C | -2.1500919 | -2.4781681 | -3.6954979 | C | 2.2836840  | -2.7940377 | -4.8190410 |
| H | -2.3482039 | -2.2904827 | -4.7612353 | C | 2.8485203  | 3.1386167  | -4.9660138 |
| C | -2.9640761 | -3.4183863 | -3.0031880 | H | 3.6425011  | 2.3961632  | -4.7400776 |
| C | -4.0540496 | -4.0715620 | -3.6532473 | C | 1.6658633  | 0.2620402  | -4.6680098 |
| C | -2.7072725 | -3.6928918 | -1.6104144 | C | -3.4258889 | 0.5132245  | -5.1950440 |
| C | -3.6022641 | -4.5624844 | -0.9175694 | H | 1.4848834  | 1.6569844  | -7.8458283 |
| C | -1.5778280 | -3.0606256 | -0.9710784 | C | -0.3783446 | 1.5016037  | -4.8773364 |
| C | -0.8890492 | -2.0741793 | -1.6884115 | C | 2.2936517  | 2.0545605  | -7.2005674 |
| O | -1.1827886 | -1.1359829 | 1.0764936  | H | 2.7911215  | 2.8861312  | -7.7418264 |
| O | 0.1677667  | -1.4078598 | -1.0801493 | H | -0.9152449 | 2.4020642  | -5.2158544 |
| P | -0.1139317 | -0.3292398 | 0.1191534  | C | 2.9901925  | -1.6500022 | -2.6563848 |
| O | 1.2493722  | -0.1920882 | 0.8047467  | H | 2.8238076  | -3.7157816 | -4.5184107 |
| O | -0.8661660 | 0.9087697  | -0.3803815 | H | 1.4265141  | -3.0899061 | -5.4572584 |
| C | -0.3526522 | -7.5158935 | 1.5240693  | C | 1.0049541  | -0.7781322 | -3.9920166 |
| C | -0.5810569 | -7.1854848 | 0.1622063  | C | -2.8397628 | 2.1230980  | -3.3357247 |
| H | -0.1383981 | -6.7503597 | 3.5381309  | C | -1.0924024 | 0.4983266  | -4.1949399 |
| H | -0.1630678 | -8.5609934 | 1.8125491  | H | -3.2980239 | -0.5039878 | -5.6160553 |
| H | -0.9975777 | -5.6343371 | -1.2742864 | H | -3.1412636 | 1.2365770  | -5.9879763 |
| H | -0.5525832 | -7.9751224 | -0.6040361 | C | 1.8121844  | -2.0087106 | -3.5805586 |
| C | -4.6660076 | -5.1655749 | -1.5737251 | C | -0.3955608 | -0.6642159 | -3.7565578 |
| C | -4.8872275 | -4.9335656 | -2.9572477 | C | -2.5782984 | 0.7298469  | -3.9272846 |
| H | -3.4479134 | -4.7444370 | 0.1549543  | H | 2.6453473  | -1.1079391 | -1.7544878 |
| H | -5.3470976 | -5.8245213 | -1.0138650 | H | -2.1964738 | 2.3087496  | -2.4548449 |
| H | -5.7293061 | -5.4241012 | -3.4686921 | H | 3.7404651  | -1.0161353 | -3.1737382 |
| H | -4.2309999 | -3.8604394 | -4.7196141 | H | 2.4395722  | 3.4975359  | -4.0005007 |
| C | 1.0633353  | -1.4297701 | 4.0748899  | H | -2.6590740 | 2.9316765  | -4.0746413 |
| C | -0.2909331 | -1.6616249 | 3.6954912  | H | 3.0425923  | 1.2459531  | -7.0675904 |
| C | 1.3518647  | -0.3037087 | 4.8648688  | H | 1.1425469  | -2.6838963 | -3.0118122 |
| C | -1.3196697 | -0.8054994 | 4.1694191  | H | -2.9040160 | -0.0090619 | -3.1671131 |
| C | -0.9763876 | 0.2899517  | 4.9851088  | H | 2.7434332  | 0.1667040  | -4.8652376 |
| C | 0.3566637  | 0.5759271  | 5.3248712  | H | 3.8902376  | 3.1607440  | -0.8998290 |
| H | 2.4000428  | -0.1003682 | 5.1405340  |   |            |            |            |
| C | -2.7921413 | -1.0846569 | 3.8701827  |   |            |            |            |
| H | -1.7808682 | 0.9434562  | 5.3553436  |   |            |            |            |
| C | -3.4955775 | 0.0863370  | 3.1661399  |   |            |            |            |
| H | -3.5110044 | 1.0024744  | 3.7914031  |   |            |            |            |
| H | -4.5465609 | -0.1686174 | 2.9222475  |   |            |            |            |
| H | -2.9859336 | 0.3331866  | 2.2142055  |   |            |            |            |
| C | -3.5353042 | -1.4965326 | 5.1554260  |   |            |            |            |
| H | -2.8339088 | -1.9535301 | 3.1815053  |   |            |            |            |
| H | -3.5453694 | -0.6712422 | 5.8977378  |   |            |            |            |
| H | -3.0518949 | -2.3715817 | 5.6351520  |   |            |            |            |
| H | -4.5896811 | -1.7623027 | 4.9338780  |   |            |            |            |
| C | 0.7510967  | 1.7471851  | 6.2187572  |   |            |            |            |
| C | -0.1721380 | 2.9676030  | 6.1041189  |   |            |            |            |
| H | 0.2316245  | 3.8148176  | 6.6950956  |   |            |            |            |
| H | -1.1873644 | 2.7541515  | 6.4991922  |   |            |            |            |
| H | -0.2868529 | 3.3007949  | 5.0540889  |   |            |            |            |

### TS1-8-o

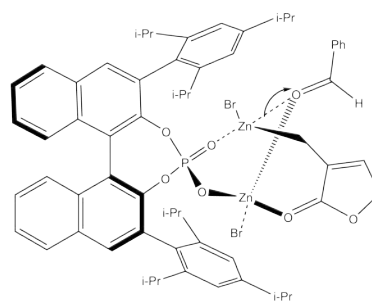

Energy(Hartree)= -11970.02355299  
number of imaginary frequencies: 2

Zn 1.9122575 1.2036967 1.4824326

|    |            |            |            |   |            |            |            |
|----|------------|------------|------------|---|------------|------------|------------|
| Br | 4.1562258  | 1.7501215  | 1.3481566  | H | -2.7713662 | -1.5559196 | 4.7610827  |
| H  | -0.6650778 | 5.4823545  | 2.6606033  | C | -3.7135800 | -2.0095644 | 2.0761034  |
| Br | -3.7586459 | 3.0081042  | -0.1847429 | H | -4.1180248 | -1.4001166 | 2.9106532  |
| H  | -3.1855421 | 1.1861757  | 3.0795231  | H | -4.5776117 | -2.4147233 | 1.5106726  |
| Zn | -2.3024244 | 1.3783856  | 0.7014908  | H | -3.1508211 | -1.3348936 | 1.4006576  |
| C  | -1.9409005 | 3.8096789  | 3.2579611  | C | -3.5948070 | -4.1433418 | 3.4606200  |
| C  | -0.7759218 | 4.7186457  | 3.4643890  | H | -2.4651843 | -3.7115730 | 1.6922275  |
| C  | -1.4963366 | 2.5239763  | 3.0899181  | H | -3.9892899 | -3.6525670 | 4.3749888  |
| C  | -2.1450494 | 1.2680556  | 2.7125662  | H | -2.9494102 | -4.9845156 | 3.7849669  |
| C  | -0.0262090 | 2.5980153  | 3.2029751  | H | -4.4586847 | -4.5650377 | 2.9061632  |
| O  | 0.3867599  | 3.8646349  | 3.4156350  | C | -0.8219308 | -0.4242409 | 6.4091862  |
| O  | 0.7854428  | 1.6638705  | 3.1101451  | C | -2.1010434 | 0.4233549  | 6.4236232  |
| H  | -0.7657008 | 5.2515885  | 4.4414618  | H | -2.1013374 | 1.1075387  | 7.2963530  |
| H  | -1.5496536 | 0.3869099  | 3.0142582  | H | -3.0107382 | -0.2073469 | 6.5086292  |
| H  | -2.9795212 | 4.1586768  | 3.1894141  | H | -2.1981264 | 1.0341937  | 5.5045545  |
| C  | -1.3601446 | 6.0562823  | -0.9951327 | C | -0.7225378 | -1.2923636 | 7.6797578  |
| C  | -0.6839808 | 4.9181886  | -0.5504758 | H | 0.0437540  | 0.2758939  | 6.4138662  |
| C  | 0.6756798  | 5.0142816  | -0.1669380 | H | -0.7715798 | -0.6682538 | 8.5963946  |
| C  | 1.3505766  | 6.2568382  | -0.2404259 | H | 0.2244439  | -1.8680145 | 7.7039968  |
| C  | 0.6675168  | 7.3928499  | -0.6880028 | H | -1.5579966 | -2.0225844 | 7.7170898  |
| C  | -0.6848998 | 7.2903460  | -1.0663687 | C | 2.3060984  | -2.8669542 | 3.2958251  |
| H  | -2.4185613 | 5.9710833  | -1.2842946 | C | 3.2118131  | -1.6487375 | 3.0595851  |
| H  | -1.2080097 | 3.9521579  | -0.4957289 | H | 4.2594758  | -1.9645984 | 2.8795362  |
| C  | 1.3990456  | 3.8360989  | 0.2887329  | H | 3.2232461  | -0.9472977 | 3.9187819  |
| H  | 2.4108603  | 6.3169492  | 0.0525510  | H | 2.8873492  | -1.0922897 | 2.1608844  |
| H  | 1.1854697  | 8.3616137  | -0.7484778 | C | 2.8878212  | -3.7936539 | 4.3815278  |
| H  | -1.2186827 | 8.1853267  | -1.4225126 | H | 2.2942634  | -3.4391360 | 2.3474593  |
| O  | 0.8649418  | 2.7197192  | 0.4306299  | H | 3.9070699  | -4.1337418 | 4.1043558  |
| C  | -0.2895989 | -3.2977321 | 0.3887669  | H | 2.2545824  | -4.6916077 | 4.5328907  |
| C  | 0.0217410  | -3.9708299 | -0.7978108 | H | 2.9602622  | -3.2727211 | 5.3592435  |
| C  | 0.7231898  | -5.2308075 | -0.6927478 | H | 0.4367379  | 4.6152877  | -5.0463566 |
| C  | 1.2634836  | -5.9159173 | -1.8227105 | H | 4.1849908  | 0.0966810  | -5.1312666 |
| C  | 0.9190097  | -5.8158254 | 0.6121298  | H | -3.7887519 | 0.1675110  | -5.8438624 |
| C  | 1.5706636  | -7.0809200 | 0.7212548  | C | 1.3837366  | 4.0712039  | -4.8342336 |
| C  | 0.5122029  | -5.0979686 | 1.7721685  | H | 4.3713168  | -0.9696607 | -2.1266334 |
| H  | 0.6905558  | -5.5434954 | 2.7630472  | H | 2.2590404  | 5.8344574  | -3.8592999 |
| C  | -0.0311230 | -3.8211069 | 1.6936675  | H | -4.1043528 | 1.1156587  | -3.4454570 |
| C  | -0.1086370 | -1.4949896 | -3.7414659 | C | 1.0008007  | 2.6313813  | -4.5139807 |
| C  | -0.6676828 | -2.2962934 | -4.7307357 | C | 3.6824590  | -0.8477818 | -4.8349726 |
| H  | -0.7621858 | -1.8976225 | -5.7518814 | C | 2.0547994  | 4.7661307  | -3.6378880 |
| C  | -1.1748137 | -3.5967610 | -4.4526067 | H | 3.0230652  | 4.2872258  | -3.3806971 |
| C  | -1.8437685 | -4.3583838 | -5.4574075 | C | 1.9736334  | 1.6750265  | -4.1738348 |
| C  | -1.0442697 | -4.1427878 | -3.1233771 | C | -2.7178752 | 0.4576429  | -5.8163544 |
| C  | -1.6555225 | -5.4031995 | -2.8495492 | H | 1.7552245  | 3.6907780  | -6.9682330 |
| C  | -0.3291969 | -3.3851750 | -2.1230924 | C | -0.3361719 | 2.2106744  | -4.5702497 |
| C  | 0.0453780  | -2.0744394 | -2.4443083 | C | 2.2607704  | 4.1526808  | -6.0965683 |
| O  | -0.9417677 | -2.0699204 | 0.3212689  | H | 2.4951953  | 5.2073135  | -6.3511902 |
| O  | 0.6775678  | -1.2902636 | -1.4887636 | H | -1.1121997 | 2.9532092  | -4.8171596 |
| P  | -0.1255960 | -0.7351818 | -0.1745980 | C | 3.5996340  | -0.2107959 | -2.3699953 |
| O  | 0.9894497  | -0.3638679 | 0.8065268  | H | 4.4737967  | -1.5969676 | -4.6248047 |
| O  | -1.2049977 | 0.2930949  | -0.5383848 | H | 3.0952231  | -1.2018857 | -5.7065314 |
| C  | 2.0527104  | -7.7350058 | -0.4017049 | C | 1.6487445  | 0.3326549  | -3.9127519 |
| C  | 1.9120385  | -7.1347540 | -1.6807245 | C | -3.0620551 | 1.4869436  | -3.5237110 |
| H  | 1.7010235  | -7.5181319 | 1.7237105  | C | -0.7214958 | 0.8809198  | -4.3128938 |
| H  | 2.5605893  | -8.7063956 | -0.3026269 | H | -2.1497864 | -0.2743799 | -6.4246942 |
| H  | 1.1727907  | -5.4613145 | -2.8184022 | H | -2.6229403 | 1.4449336  | -6.3155542 |
| H  | 2.3262563  | -7.6361479 | -2.5687213 | C | 2.7830112  | -0.6430048 | -3.6010540 |
| C  | -2.3181863 | -6.1092303 | -3.8438319 | C | 0.2860949  | -0.0741980 | -3.9965149 |
| C  | -2.4004293 | -5.5936604 | -5.1645355 | C | -2.2076804 | 0.5264999  | -4.3644638 |
| H  | -1.6060065 | -5.8113014 | -1.8305535 | H | 2.9556332  | -0.0909840 | -1.4780936 |
| H  | -2.7885872 | -7.0749430 | -3.6036360 | H | -2.6652593 | 1.5861546  | -2.4963243 |
| H  | -2.9209522 | -6.1667643 | -5.9468333 | H | 4.1271008  | 0.7510028  | -2.5378133 |
| H  | -1.9253475 | -3.9326919 | -6.4699412 | H | 1.4085946  | 4.7222117  | -2.7403822 |
| C  | 0.8632798  | -2.4900943 | 3.6375370  | H | -3.1120841 | 2.5043753  | -3.9643089 |
| C  | -0.2602949 | -2.9765992 | 2.9068182  | H | 3.2244021  | 3.6217040  | -5.9492163 |
| C  | 0.6324558  | -1.6480225 | 4.7388067  | H | 2.3332573  | -1.6289415 | -3.3685031 |
| C  | -1.5759836 | -2.6304903 | 3.3156491  | H | -2.3257453 | -0.4812719 | -3.9179399 |
| C  | -1.7478715 | -1.8103015 | 4.4469078  | H | 3.0310431  | 1.9805144  | -4.1204368 |
| C  | -0.6580428 | -1.2932986 | 5.1665355  | H | 2.4882173  | 3.9511539  | 0.5291309  |
| H  | 1.4974636  | -1.2470386 | 5.2926105  |   |            |            |            |
| C  | -2.8119752 | -3.1489431 | 2.5825343  |   |            |            |            |

TS2-8-o; COSMO

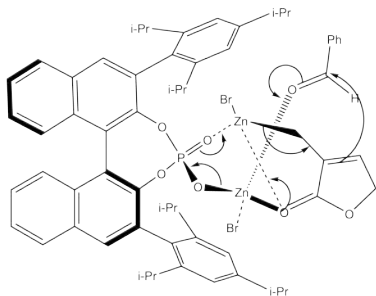

Energy(Hartree)= -11970.00809093

|   |            |            |            |
|---|------------|------------|------------|
| C | 0.7541779  | 2.3502860  | 1.4076096  |
| C | 2.1536030  | 2.3895325  | 1.4266582  |
| C | 2.7987539  | 3.6796519  | 1.4949835  |
| C | 4.2083424  | 3.8545399  | 1.3449332  |
| C | 1.9862508  | 4.8557911  | 1.6891731  |
| C | 2.6151962  | 6.1329546  | 1.7982959  |
| C | 0.5696049  | 4.7302206  | 1.7140720  |
| H | -0.0397018 | 5.6382337  | 1.8393619  |
| C | -0.0698099 | 3.5105250  | 1.5188726  |
| C | 3.4770713  | -0.9401259 | 0.0439620  |
| C | 4.5603079  | -1.1618974 | 0.8878949  |
| H | 5.2145147  | -2.0264469 | 0.7032179  |
| C | 4.8175727  | -0.3419729 | 2.0225034  |
| C | 5.8683961  | -0.6547400 | 2.9368490  |
| C | 3.9744723  | 0.7992526  | 2.2807803  |
| C | 4.1817928  | 1.5353509  | 3.4857171  |
| C | 2.9441288  | 1.1323843  | 1.3275775  |
| C | 2.7002947  | 0.2349981  | 0.2833144  |
| O | 0.1100259  | 1.1157448  | 1.3221491  |
| O | 1.6648565  | 0.5135969  | -0.6143633 |
| P | 0.1409160  | 0.2606020  | -0.0777308 |
| O | -0.7636983 | 0.9025975  | -1.1471741 |
| O | -0.0847032 | -1.2080095 | 0.2921628  |
| C | 3.9906995  | 6.2620211  | 1.6821695  |
| C | 4.7884718  | 5.1123886  | 1.4358065  |
| H | 1.9801712  | 7.0184021  | 1.9591453  |
| H | 4.4638213  | 7.2526526  | 1.7616152  |
| H | 4.8402344  | 2.9788291  | 1.1439219  |
| H | 5.8767857  | 5.2192259  | 1.3098114  |
| C | 5.1980843  | 1.1920841  | 4.3667541  |
| C | 6.0611007  | 0.0989834  | 4.0848252  |
| H | 3.5158030  | 2.3773285  | 3.7201843  |
| H | 5.3316151  | 1.7684122  | 5.2949578  |
| H | 6.8686008  | -0.1579657 | 4.7872725  |
| H | 6.5115215  | -1.5224515 | 2.7212917  |
| C | -2.1337440 | 3.9075381  | 0.1423387  |
| C | -1.5553784 | 3.4318551  | 1.3523781  |
| C | -3.5356689 | 3.8775844  | 0.0124944  |
| C | -2.3792847 | 2.9210714  | 2.3941739  |
| C | -3.7733442 | 2.9189278  | 2.2109751  |
| C | -4.3753532 | 3.4069522  | 1.0353856  |
| H | -3.9958236 | 4.2511641  | -0.9165395 |
| C | -1.7622343 | 2.4859479  | 3.7244331  |
| H | -4.4116640 | 2.5370910  | 3.0206845  |
| C | -2.5851701 | 1.4481097  | 4.5000440  |
| H | -3.5329211 | 1.8762701  | 4.8895708  |
| H | -2.0073294 | 1.0864620  | 5.3746353  |
| H | -2.8260117 | 0.5740375  | 3.8668560  |
| C | -1.4833320 | 3.7186036  | 4.6094792  |
| H | -0.7875741 | 2.0080654  | 3.4919064  |
| H | -2.4325546 | 4.2352099  | 4.8642774  |
| H | -0.8250903 | 4.4508607  | 4.1014130  |
| H | -0.9911425 | 3.4184274  | 5.5579210  |
| C | -5.8898868 | 3.4369216  | 0.8510573  |
| C | -6.4284317 | 2.0770707  | 0.3695124  |
| H | -7.5199202 | 2.1327122  | 0.1739098  |

|    |            |            |            |
|----|------------|------------|------------|
| H  | -6.2540009 | 1.2950609  | 1.1370725  |
| H  | -5.9205671 | 1.7555739  | -0.5615848 |
| C  | -6.6389248 | 3.9160475  | 2.1047274  |
| H  | -6.0900483 | 4.1728856  | 0.0408767  |
| H  | -7.7208541 | 4.0357293  | 1.8902341  |
| H  | -6.2490940 | 4.8893203  | 2.4657354  |
| H  | -6.5506496 | 3.1874952  | 2.9376739  |
| C  | -1.2916940 | 4.5198764  | -0.9800269 |
| C  | -1.6170620 | 3.9622529  | -2.3740045 |
| H  | -0.9515051 | 4.4216398  | -3.1337457 |
| H  | -2.6629281 | 4.1674299  | -2.6798988 |
| H  | -1.4646167 | 2.8679199  | -2.4096222 |
| C  | -1.4223028 | 6.0561748  | -0.9720957 |
| H  | -0.2303586 | 4.2724046  | -0.7762783 |
| H  | -0.7679833 | 6.5118195  | -1.7441849 |
| H  | -1.1449253 | 6.4888270  | 0.0098882  |
| H  | -2.4671652 | 6.3639628  | -1.1872439 |
| H  | 1.5205226  | -5.6501886 | -3.6053253 |
| H  | 4.8880339  | -0.9033966 | -4.5224765 |
| H  | 3.6552794  | -4.8581339 | 2.2577157  |
| C  | 1.8125780  | -4.7117351 | -4.1266541 |
| H  | 3.0081727  | 1.6203979  | -3.9451699 |
| H  | 0.1745983  | -4.9174072 | -5.5739026 |
| H  | 1.0885717  | -4.5445775 | 2.1684715  |
| C  | 2.2909390  | -3.7421045 | -3.0535295 |
| C  | 5.0028852  | -0.3094293 | -3.5915755 |
| C  | 0.5602617  | -4.1749228 | -4.8447309 |
| H  | 0.7872819  | -3.2423907 | -5.4027363 |
| C  | 2.7294646  | -2.4474697 | -3.3805478 |
| C  | 3.7354866  | -4.5597711 | 1.1919762  |
| H  | 3.8166157  | -5.4797764 | -4.6111429 |
| C  | 2.2815539  | -4.1032725 | -1.6971429 |
| C  | 2.9287310  | -5.0612388 | -5.1268014 |
| H  | 2.5758800  | -5.8078777 | -5.8681257 |
| H  | 1.9547991  | -5.1200498 | -1.4295480 |
| C  | 2.6295344  | 0.6064205  | -3.7006300 |
| H  | 5.4082312  | 0.6845506  | -3.8735295 |
| H  | 5.7559589  | -0.8209065 | -2.9580646 |
| C  | 3.1383476  | -1.5251578 | -2.4015662 |
| C  | 1.2290902  | -4.4275087 | 1.0758296  |
| C  | 2.6501305  | -3.2131153 | -0.6710503 |
| H  | 4.7041105  | -4.0408580 | 1.0557504  |
| H  | 3.7669466  | -5.4857054 | 0.5796205  |
| C  | 3.6591794  | -0.1614639 | -2.8525635 |
| C  | 3.0927515  | -1.9066070 | -1.0307131 |
| C  | 2.5395135  | -3.6780814 | 0.7826712  |
| H  | 1.6720494  | 0.7198307  | -3.1560246 |
| H  | 0.3508206  | -3.8816590 | 0.6740394  |
| H  | 2.4248416  | 0.0903363  | -4.6620442 |
| H  | -0.2492751 | -3.9487009 | -4.1221060 |
| H  | 1.2134262  | -5.4410821 | 0.6243460  |
| H  | 3.2593139  | -4.1633097 | -5.6900117 |
| H  | 3.8573764  | 0.4454417  | -1.9464623 |
| H  | 2.5394736  | -2.7748929 | 1.4266602  |
| H  | 2.7572951  | -2.1417413 | -4.4388396 |
| Zn | -2.4267379 | 0.3029665  | -1.9066915 |
| Br | -4.1887605 | 1.2140454  | -3.0826401 |
| C  | -1.9685628 | -6.6519283 | -2.1203414 |
| C  | -3.1702170 | -2.5326483 | -1.9603431 |
| C  | -1.0877901 | -5.6817395 | -1.6156050 |
| C  | -3.6289692 | -4.9295840 | -2.5394656 |
| C  | -2.7479824 | -3.9506698 | -2.0243618 |
| C  | -3.2404474 | -6.2724420 | -2.5910756 |
| C  | -1.4659298 | -4.3313443 | -1.5715125 |
| O  | -2.2715476 | -1.6268403 | -1.7591721 |
| H  | -1.6614600 | -7.7084579 | -2.1560242 |
| H  | -4.6240005 | -4.6266819 | -2.9052468 |
| H  | -0.0916482 | -5.9802143 | -1.2597412 |
| H  | -3.9263369 | -7.0293499 | -3.0011930 |
| H  | -0.7773645 | -3.5492251 | -1.2180577 |
| Br | 0.1984324  | -2.1332867 | 3.9116165  |

|    |            |            |            |
|----|------------|------------|------------|
| Zn | -0.9164463 | -2.0081924 | 1.8721079  |
| H  | -5.2380238 | -0.8387944 | -1.3565104 |
| H  | -2.6532645 | -4.4647452 | 1.2699140  |
| C  | -4.4273764 | -2.6166512 | -0.2610675 |
| C  | -5.1420761 | -1.2824798 | -0.3434568 |
| H  | -4.9675423 | -3.5423191 | -0.5011725 |
| C  | -3.5439839 | -2.5261298 | 0.8420632  |
| C  | -2.6959043 | -3.3997195 | 1.5381394  |
| C  | -3.4165121 | -1.0702901 | 1.1261704  |
| O  | -4.3050266 | -0.3655454 | 0.4184942  |
| O  | -2.5513205 | -0.5366355 | 1.8269280  |
| H  | -6.1494449 | -1.3001523 | 0.1254341  |
| H  | -2.5725978 | -3.1993595 | 2.6238869  |
| H  | -4.0598192 | -2.2779796 | -2.5860611 |

### TS2-8-o

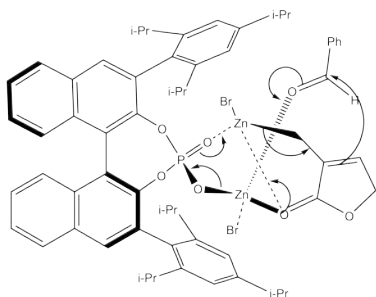

Energy(Hartree)= -11969.99557971  
number of imaginary frequencies: 1

|   |            |            |            |
|---|------------|------------|------------|
| C | 0.7648805  | 2.3402444  | 1.4346586  |
| C | 2.1641488  | 2.3891864  | 1.4393550  |
| C | 2.7999371  | 3.6841352  | 1.5083464  |
| C | 4.2056720  | 3.8718642  | 1.3416533  |
| C | 1.9808057  | 4.8519310  | 1.7225819  |
| C | 2.6014744  | 6.1320924  | 1.8373349  |
| C | 0.5655897  | 4.7156720  | 1.7564194  |
| H | -0.0504944 | 5.6177840  | 1.8904080  |
| C | -0.0669891 | 3.4939529  | 1.5531264  |
| C | 3.4898892  | -0.9303546 | 0.0313703  |
| C | 4.5924872  | -1.1401630 | 0.8524665  |
| H | 5.2502199  | -1.9988147 | 0.6536693  |
| C | 4.8649844  | -0.3174735 | 1.9811731  |
| C | 5.9373542  | -0.6183693 | 2.8735628  |
| C | 4.0137974  | 0.8132441  | 2.2579866  |
| C | 4.2351241  | 1.5480491  | 3.4609993  |
| C | 2.9629582  | 1.1385553  | 1.3240485  |
| C | 2.7090403  | 0.2394238  | 0.2832928  |
| O | 0.1287604  | 1.1007121  | 1.3545290  |
| O | 1.6606982  | 0.5103946  | -0.6016324 |
| P | 0.1430160  | 0.2570002  | -0.0510467 |
| O | -0.7700672 | 0.9126169  | -1.1047370 |
| O | -0.0832558 | -1.2142278 | 0.3121604  |
| C | 3.9739059  | 6.2731388  | 1.7066466  |
| C | 4.7768731  | 5.1328533  | 1.4384118  |
| H | 1.9613634  | 7.0109139  | 2.0133854  |
| H | 4.4401163  | 7.2666093  | 1.7904978  |
| H | 4.8410614  | 3.0028249  | 1.1241133  |
| H | 5.8625887  | 5.2492768  | 1.2997414  |
| C | 5.2728700  | 1.2157545  | 4.3202973  |
| C | 6.1439540  | 0.1352560  | 4.0184869  |
| H | 3.5626416  | 2.3802816  | 3.7104021  |
| H | 5.4166394  | 1.7910842  | 5.2474669  |
| H | 6.9683299  | -0.1132714 | 4.7040240  |
| H | 6.5858044  | -1.4783479 | 2.6436583  |
| C | -2.1191639 | 3.8887402  | 0.1613874  |

|   |            |            |            |
|---|------------|------------|------------|
| C | -1.5511492 | 3.4100792  | 1.3755716  |
| C | -3.5194224 | 3.8569519  | 0.0190063  |
| C | -2.3830340 | 2.8920885  | 2.4066877  |
| C | -3.7755911 | 2.8905353  | 2.2115253  |
| C | -4.3676439 | 3.3844464  | 1.0338670  |
| H | -3.9718060 | 4.2340595  | -0.9123631 |
| C | -1.7767526 | 2.4475068  | 3.7386316  |
| H | -4.4197778 | 2.5055974  | 3.0150288  |
| C | -2.6011696 | 1.3981126  | 4.4968146  |
| H | -3.5546256 | 1.8173253  | 4.8821223  |
| H | -2.0295946 | 1.0296008  | 5.3722562  |
| H | -2.8324285 | 0.5277186  | 3.8551802  |
| C | -1.5119836 | 3.6732559  | 4.6372276  |
| H | -0.7975204 | 1.9765445  | 3.5113936  |
| H | -2.4654397 | 4.1840060  | 4.8873005  |
| H | -0.8519899 | 4.4126864  | 4.1421912  |
| H | -1.0276131 | 3.3668590  | 5.5875279  |
| C | -5.8807424 | 3.4242843  | 0.8382604  |
| C | -6.4236092 | 2.0791756  | 0.3219918  |
| H | -7.5132467 | 2.1453728  | 0.1196816  |
| H | -6.2600258 | 1.2800787  | 1.0743360  |
| H | -5.9116724 | 1.7763587  | -0.6131618 |
| C | -6.6379605 | 3.8812830  | 2.0949188  |
| H | -6.0704903 | 4.1784572  | 0.0424372  |
| H | -7.7170893 | 4.0135371  | 1.8742076  |
| H | -6.2440828 | 4.8430045  | 2.4808212  |
| H | -6.5629172 | 3.1346596  | 2.9129641  |
| C | -1.2687215 | 4.5096190  | -0.9501965 |
| C | -1.5878330 | 3.9701220  | -2.3525048 |
| H | -0.9142199 | 4.4330499  | -3.1026608 |
| H | -2.6297280 | 4.1839062  | -2.6654747 |
| H | -1.4410530 | 2.8756332  | -2.4016900 |
| C | -1.3953638 | 6.0460784  | -0.9267166 |
| H | -0.2091866 | 4.2569046  | -0.7436132 |
| H | -0.7367006 | 6.5085065  | -1.6908787 |
| H | -1.1219486 | 6.4682961  | 0.0606047  |
| H | -2.4384489 | 6.3587418  | -1.1425378 |
| H | 1.4572342  | -5.6598346 | -3.5476931 |
| H | 4.8319616  | -0.9249851 | -4.5450715 |
| H | 3.7167709  | -4.8152472 | 2.2759183  |
| C | 1.7535987  | -4.7302724 | -4.0827021 |
| H | 2.9481367  | 1.6036132  | -3.9678109 |
| H | 0.1058287  | -4.9466723 | -5.5172955 |
| H | 1.1415675  | -4.5190448 | 2.2241160  |
| C | 2.2461425  | -3.7514279 | -3.0244186 |
| C | 4.9537050  | -0.3210776 | -3.6215816 |
| C | 0.5017819  | -4.1956538 | -4.8026483 |
| H | 0.7317456  | -3.2744772 | -5.3777784 |
| C | 2.6773076  | -2.4589923 | -3.3679237 |
| C | 3.7784098  | -4.5256373 | 1.2066886  |
| H | 3.7508904  | -5.5170082 | -4.5644017 |
| C | 2.2626591  | -4.1035409 | -1.6659735 |
| C | 2.8635524  | -5.1005804 | -5.0822461 |
| H | 2.5039943  | -5.8542007 | -5.8131726 |
| H | 1.9410904  | -5.1185937 | -1.3862124 |
| C | 2.5767886  | 0.5892685  | -3.7145166 |
| H | 5.3543594  | 0.6706315  | -3.9176578 |
| H | 5.7136477  | -0.8249670 | -2.9905693 |
| C | 3.1052939  | -1.5307205 | -2.4032973 |
| C | 1.2706384  | -4.4224636 | 1.1282363  |
| C | 2.6515682  | -3.2076000 | -0.6529184 |
| H | 4.7395249  | -3.9985807 | 1.0520687  |
| H | 3.8117467  | -5.4561260 | 0.6015010  |
| C | 3.6167914  | -0.1694103 | -2.8713635 |
| C | 3.0882211  | -1.9042734 | -1.0300989 |
| C | 2.5672278  | -3.6607550 | 0.8064679  |
| H | 1.6235512  | 0.7024086  | -3.1625570 |
| H | 0.3802855  | -3.8961817 | 0.7275297  |
| H | 2.3645499  | 0.0683210  | -4.6715516 |
| H | -0.3021607 | -3.9500302 | -4.0805034 |
| H | 1.2668799  | -5.4453294 | 0.6972142  |

|    |            |            |            |
|----|------------|------------|------------|
| H  | 3.1983964  | -4.2121138 | -5.6575536 |
| H  | 3.8225049  | 0.4454252  | -1.9723566 |
| H  | 2.5666184  | -2.7515733 | 1.4420407  |
| H  | 2.6837661  | -2.1596029 | -4.4282946 |
| Zn | -2.4255274 | 0.3437637  | -1.8931907 |
| Br | -4.1311481 | 1.2226576  | -3.1589690 |
| C  | -1.9465638 | -6.6309294 | -2.0528854 |
| C  | -3.1192838 | -2.5043347 | -2.0248881 |
| C  | -1.0888609 | -5.6603500 | -1.5119340 |
| C  | -3.5613330 | -4.9030011 | -2.6009077 |
| C  | -2.7042012 | -3.9227477 | -2.0493727 |
| C  | -3.1831687 | -6.2490168 | -2.6077101 |
| C  | -1.4544533 | -4.3059225 | -1.5148321 |
| O  | -2.2379343 | -1.5959956 | -1.7873477 |
| H  | -1.6485976 | -7.6906068 | -2.0516443 |
| H  | -4.5292411 | -4.5970120 | -3.0314708 |
| H  | -0.1200134 | -5.9594875 | -1.0884117 |
| H  | -3.8492114 | -7.0069588 | -3.0473173 |
| H  | -0.7794279 | -3.5232889 | -1.1375479 |
| Br | 0.0604195  | -2.1964858 | 3.9525856  |
| Zn | -0.9506552 | -1.9955881 | 1.8808361  |
| H  | -5.2037970 | -0.8078095 | -1.4738937 |
| H  | -2.7405849 | -4.4533502 | 1.2450398  |
| C  | -4.4496973 | -2.5870812 | -0.3370988 |
| C  | -5.1347598 | -1.2411253 | -0.4534272 |
| H  | -4.9877498 | -3.5085794 | -0.5966550 |
| C  | -3.5865529 | -2.5029421 | 0.7816438  |
| C  | -2.7689009 | -3.3849296 | 1.5005926  |
| C  | -3.4345922 | -1.0476456 | 1.0508326  |
| O  | -4.2915527 | -0.3321622 | 0.3093813  |
| O  | -2.5783743 | -0.5181704 | 1.7633944  |
| H  | -6.1514157 | -1.2249682 | -0.0027925 |
| H  | -2.6356851 | -3.1695092 | 2.5814728  |
| H  | -3.9932994 | -2.2517946 | -2.6740131 |

|   |            |            |            |
|---|------------|------------|------------|
| P | -0.0060562 | 0.4202762  | 0.1529153  |
| O | -0.8630275 | 1.1398329  | -0.8988250 |
| O | -0.4358662 | -0.9594855 | 0.6561385  |
| C | 4.7039591  | 5.9215622  | 1.3823264  |
| C | 5.3378965  | 4.6633363  | 1.2012009  |
| H | 2.8193763  | 6.9542363  | 1.6495384  |
| H | 5.3036956  | 6.8445619  | 1.3817046  |
| H | 5.0994831  | 2.5254502  | 1.0616298  |
| H | 6.4268109  | 4.6167183  | 1.0467866  |
| C | 5.3074918  | 0.7782218  | 4.3414502  |
| C | 5.9480472  | -0.4688779 | 4.1110714  |
| H | 3.8454541  | 2.2093604  | 3.6585834  |
| H | 5.5704003  | 1.3715667  | 5.2305860  |
| H | 6.7145295  | -0.8304751 | 4.8135038  |
| H | 6.0571810  | -2.2182713 | 2.8393894  |
| C | -1.7651699 | 4.0722071  | 0.1464870  |
| C | -1.1716752 | 3.7417518  | 1.3970519  |
| C | -3.1591405 | 3.9202536  | 0.0060303  |
| C | -1.9794107 | 3.3058791  | 2.4815229  |
| C | -3.3649949 | 3.1699913  | 2.2878516  |
| C | -3.9766965 | 3.4604101  | 1.0545585  |
| H | -3.6323612 | 4.1649126  | -0.9571422 |
| C | -1.3755595 | 3.0493981  | 3.8608575  |
| H | -3.9884329 | 2.8304509  | 3.1307750  |
| C | -1.6954115 | 1.6526314  | 4.4099955  |
| H | -2.7849674 | 1.5018285  | 4.5603828  |
| H | -1.1946951 | 1.4872385  | 5.3854982  |
| H | -1.3300355 | 0.8704751  | 3.7181688  |
| C | -1.8017669 | 4.1553320  | 4.8454832  |
| H | -0.2724306 | 3.1128314  | 3.7600389  |
| H | -2.9013867 | 4.1528476  | 4.9997555  |
| H | -1.5185649 | 5.1590563  | 4.4682604  |
| H | -1.3203844 | 4.0097641  | 5.8348484  |
| C | -5.4832358 | 3.3265509  | 0.8640495  |
| C | -5.9700378 | 1.8794114  | 1.0533952  |
| H | -7.0700564 | 1.8172705  | 0.9194390  |
| H | -5.7308975 | 1.4989755  | 2.0688111  |
| H | -5.4951113 | 1.2043922  | 0.3157079  |
| C | -6.2482004 | 4.3015576  | 1.7780044  |
| H | -5.6976521 | 3.6084952  | -0.1896323 |
| H | -7.3395582 | 4.2522825  | 1.5822018  |
| H | -5.9165265 | 5.3477747  | 1.6195508  |
| H | -6.0894411 | 4.0578781  | 2.8496939  |
| C | -0.9441765 | 4.6420601  | -1.0109026 |
| C | -1.3067639 | 4.0703126  | -2.3897647 |
| H | -0.6384244 | 4.5003614  | -3.1639672 |
| H | -2.3489606 | 4.3047727  | -2.6874263 |
| H | -1.1852562 | 2.9710508  | -2.4075667 |
| C | -1.0540026 | 6.1807447  | -1.0179364 |
| H | 0.1177530  | 4.3824946  | -0.8235647 |
| H | -0.4113758 | 6.6191584  | -1.8096575 |
| H | -0.7508297 | 6.6205292  | -0.0466762 |
| H | -2.1002910 | 6.4972779  | -1.2132449 |
| H | 0.8002172  | -5.7090372 | -3.5767192 |
| H | 4.7030478  | -1.3579989 | -4.3550335 |
| H | 2.3535521  | -5.0605195 | 2.4616305  |
| C | 1.4010093  | -4.9091159 | -4.0629349 |
| H | 3.0935447  | 1.3391334  | -3.7980330 |
| H | 0.1919445  | -5.0319263 | -5.8867649 |
| H | -0.0608085 | -4.2292076 | 2.1523876  |
| C | 1.7904748  | -3.9237364 | -2.9675235 |
| C | 4.8571428  | -0.7967105 | -3.4096026 |
| C | 0.5228368  | -4.2697298 | -5.1514417 |
| H | 1.0750621  | -3.4871044 | -5.7120192 |
| C | 2.4061016  | -2.6974738 | -3.2717744 |
| C | 2.5631460  | -4.8509066 | 1.3922559  |
| H | 3.2603684  | -6.0745268 | -3.8943445 |
| C | 1.5769545  | -4.2256069 | -1.6121905 |
| C | 2.6503586  | -5.5730643 | -4.6726062 |
| H | 2.3680589  | -6.3308539 | -5.4331103 |
| H | 1.0902844  | -5.1808437 | -1.3556086 |

### int1-8-o; COSMO

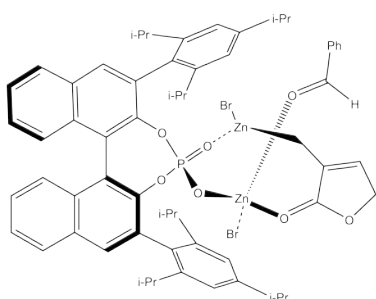

Energy(Hartree)= -11970.05111129

|   |           |            |            |
|---|-----------|------------|------------|
| C | 0.9862818 | 2.4655329  | 1.4813306  |
| C | 2.3750941 | 2.3151822  | 1.4390407  |
| C | 3.1806966 | 3.5130870  | 1.4031637  |
| C | 4.5954009 | 3.4901476  | 1.2108839  |
| C | 2.5321155 | 4.7975052  | 1.5335471  |
| C | 3.3270730 | 5.9832370  | 1.5372683  |
| C | 1.1100595 | 4.8683455  | 1.6005772  |
| H | 0.6305023 | 5.8565755  | 1.6695803  |
| C | 0.3193450 | 3.7295822  | 1.5229098  |
| C | 3.1187485 | -1.2341655 | 0.1769017  |
| C | 4.1626795 | -1.6067461 | 1.0163492  |
| H | 4.6559475 | -2.5782554 | 0.8612014  |
| C | 4.5867209 | -0.7891552 | 2.1013828  |
| C | 5.5885180 | -1.2368599 | 3.0138799  |
| C | 3.9704164 | 0.4984763  | 2.3075533  |
| C | 4.3444099 | 1.2505826  | 3.4607135  |
| C | 2.9708585 | 0.9508243  | 1.3729150  |
| C | 2.5410384 | 0.0542982  | 0.3879570  |
| O | 0.1844754 | 1.3305042  | 1.5145994  |
| O | 1.5113496 | 0.4362596  | -0.4743326 |



|    |            |            |            |
|----|------------|------------|------------|
| C  | 2.5979313  | 0.3752698  | -3.5593119 |
| H  | 5.3789487  | 0.1493862  | -3.6631674 |
| H  | 5.5311893  | -1.3991961 | -2.7671156 |
| C  | 2.8280522  | -1.8005056 | -2.2741395 |
| C  | 0.1624383  | -4.1257641 | 1.0686764  |
| C  | 1.9582758  | -3.3551374 | -0.5730025 |
| H  | 3.6316424  | -4.5703882 | 1.3060867  |
| H  | 2.4180665  | -5.7933096 | 0.8222233  |
| C  | 3.5214042  | -0.5075763 | -2.6999909 |
| C  | 2.6194437  | -2.1389846 | -0.9073473 |
| C  | 1.6391774  | -3.7360805 | 0.8712599  |
| H  | 1.6545626  | 0.5967840  | -3.0230657 |
| H  | -0.5124171 | -3.3568218 | 0.6421437  |
| H  | 2.3451482  | -0.1162469 | -4.5223848 |
| H  | -0.3805068 | -3.7989540 | -4.7156205 |
| H  | -0.0887324 | -5.0988267 | 0.5952794  |
| H  | 3.2957583  | -4.8188734 | -5.1700565 |
| H  | 3.7643283  | 0.0667250  | -1.7837800 |
| H  | 1.8122010  | -2.8396004 | 1.4997290  |
| H  | 2.5794265  | -2.4311504 | -4.3267417 |
| Zn | -2.7399281 | 0.7589734  | -1.2872814 |
| Br | -4.3659266 | 1.6204377  | -2.7140990 |
| C  | -2.6110033 | -5.9609336 | -3.4386613 |
| C  | -2.8543845 | -1.7325316 | -2.9743535 |
| C  | -1.8783165 | -5.3268750 | -2.4151064 |
| C  | -3.4713760 | -3.8165299 | -4.1836426 |
| C  | -2.7362374 | -3.1775440 | -3.1592124 |
| C  | -3.4008568 | -5.2082421 | -4.3264753 |
| C  | -1.9268170 | -3.9373091 | -2.2790890 |
| O  | -2.2244040 | -1.1224912 | -2.0985880 |
| H  | -2.5630611 | -7.0556511 | -3.5453500 |
| H  | -4.0969603 | -3.2137207 | -4.8610272 |
| H  | -1.2625152 | -5.9256774 | -1.7276684 |
| H  | -3.9657668 | -5.7116755 | -5.1250852 |
| H  | -1.3498904 | -3.4123747 | -1.5028795 |
| Br | 1.1609643  | -1.4191320 | 3.8939592  |
| Zn | -0.7811338 | -1.4538845 | 2.5896937  |
| H  | -4.2251165 | -3.9448889 | -0.6618491 |
| H  | -2.8543303 | -2.4262203 | 3.8271912  |
| C  | -4.0695048 | -3.3614395 | 1.4489523  |
| C  | -4.6736731 | -3.2572306 | 0.0901860  |
| H  | -4.1090011 | -4.2750760 | 2.0572583  |
| C  | -3.4897945 | -2.1711687 | 1.7955672  |
| C  | -2.7400597 | -1.7303537 | 2.9743018  |
| C  | -3.6933104 | -1.2839100 | 0.6303475  |
| O  | -4.3980415 | -1.9058085 | -0.3352972 |
| O  | -3.2923085 | -0.1173567 | 0.4883586  |
| H  | -5.7758049 | -3.4060216 | 0.0705044  |
| H  | -3.0661132 | -0.7148736 | 3.2819757  |
| H  | -3.5716773 | -1.1789369 | -3.6347109 |

### int1-8-o

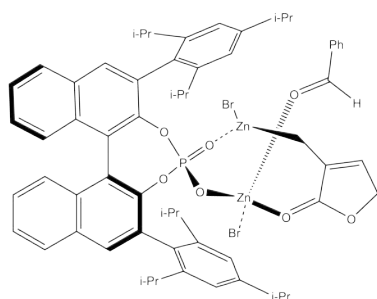

Energy(Hartree)= -11970.03822009

|   |           |           |           |
|---|-----------|-----------|-----------|
| C | 0.9879768 | 2.4512105 | 1.4937684 |
| C | 2.3768485 | 2.3035887 | 1.4512629 |
| C | 3.1801846 | 3.5028527 | 1.4146986 |
| C | 4.5952491 | 3.4823428 | 1.2272130 |
| C | 2.5285540 | 4.7861734 | 1.5388916 |
| C | 3.3212383 | 5.9727890 | 1.5415168 |

|   |            |            |            |
|---|------------|------------|------------|
| C | 1.1063709  | 4.8541278  | 1.5996037  |
| H | 0.6235705  | 5.8414388  | 1.6589561  |
| C | 0.3177903  | 3.7137861  | 1.5261225  |
| C | 3.1221151  | -1.2401418 | 0.1761321  |
| C | 4.1689401  | -1.6133491 | 1.0114777  |
| H | 4.6621515  | -2.5839731 | 0.8510814  |
| C | 4.5944262  | -0.7997021 | 2.0983484  |
| C | 5.5980645  | -1.2487570 | 3.0073634  |
| C | 3.9757082  | 0.4855046  | 2.3111650  |
| C | 4.3499401  | 1.2335009  | 3.4665797  |
| C | 2.9735413  | 0.9398073  | 1.3805666  |
| C | 2.5427586  | 0.0464318  | 0.3929579  |
| O | 0.1898844  | 1.3131020  | 1.5291824  |
| O | 1.5119152  | 0.4294939  | -0.4672646 |
| P | -0.0058835 | 0.4174076  | 0.1585515  |
| O | -0.8534236 | 1.1590319  | -0.8853866 |
| O | -0.4473333 | -0.9641576 | 0.6477682  |
| C | 4.6982513  | 5.9136556  | 1.3920613  |
| C | 5.3350074  | 4.6566938  | 1.2171531  |
| H | 2.8110014  | 6.9430034  | 1.6486598  |
| H | 5.2959196  | 6.8379279  | 1.3909478  |
| H | 5.1010166  | 2.5178816  | 1.0833114  |
| H | 6.4245363  | 4.6115974  | 1.0671446  |
| C | 5.3154503  | 0.7594867  | 4.3429702  |
| C | 5.9576554  | -0.4849523 | 4.1066532  |
| H | 3.8482433  | 2.1897911  | 3.6687597  |
| H | 5.5779685  | 1.3492948  | 5.2344320  |
| H | 6.7250878  | -0.8485594 | 4.8068521  |
| H | 6.0671798  | -2.2291119 | 2.8287333  |
| C | -1.7601657 | 4.0500625  | 0.1375877  |
| C | -1.1723410 | 3.7210767  | 1.3910905  |
| C | -3.1522980 | 3.8876878  | -0.0119856 |
| C | -1.9843091 | 3.2801099  | 2.4703208  |
| C | -3.3671261 | 3.1323176  | 2.2670334  |
| C | -3.9734881 | 3.4197781  | 1.0305882  |
| H | -3.6223261 | 4.1368700  | -0.9755384 |
| C | -1.3879354 | 3.0400093  | 3.8559572  |
| H | -3.9938495 | 2.7903921  | 3.1065749  |
| C | -1.6953820 | 1.6457293  | 4.4174335  |
| H | -2.7844570 | 1.4815698  | 4.5576007  |
| H | -1.2040580 | 1.4976325  | 5.4002351  |
| H | -1.3098853 | 0.8601888  | 3.7407801  |
| C | -1.8329013 | 4.1514228  | 4.8260113  |
| H | -0.2848996 | 3.1143784  | 3.7622401  |
| H | -2.9333388 | 4.1392523  | 4.9730987  |
| H | -1.5590419 | 5.1541011  | 4.4398160  |
| H | -1.3568106 | 4.0220834  | 5.8200950  |
| C | -5.4796547 | 3.2902288  | 0.8332443  |
| C | -5.9801055 | 1.8500051  | 1.0367363  |
| H | -7.0813991 | 1.7988370  | 0.9100788  |
| H | -5.7394220 | 1.4730871  | 2.0531296  |
| H | -5.5198002 | 1.1656479  | 0.2985124  |
| C | -6.2403649 | 4.2831678  | 1.7313965  |
| H | -5.6866460 | 3.5597539  | -0.2250185 |
| H | -7.3311015 | 4.2423272  | 1.5306082  |
| H | -5.8974022 | 5.3239286  | 1.5629190  |
| H | -6.0894371 | 4.0516567  | 2.8068396  |
| C | -0.9397888 | 4.6370833  | -1.0116324 |
| C | -1.2743370 | 4.0598306  | -2.3954128 |
| H | -0.6218950 | 4.5217792  | -3.1646219 |
| H | -2.3240537 | 4.2506139  | -2.6974228 |
| H | -1.1040057 | 2.9671719  | -2.4214062 |
| C | -1.0852834 | 6.1728533  | -1.0162088 |
| H | 0.1257696  | 4.4021272  | -0.8137073 |
| H | -0.4424017 | 6.6286565  | -1.7976753 |
| H | -0.8062964 | 6.6165298  | -0.0394346 |
| H | -2.1355345 | 6.4666063  | -1.2243305 |
| H | 0.8064888  | -5.7190597 | -3.5751145 |
| H | 4.6828591  | -1.3481839 | -4.3591412 |
| H | 2.3946777  | -5.0775063 | 2.4559062  |
| C | 1.4040430  | -4.9165310 | -4.0618867 |

|    |            |            |            |
|----|------------|------------|------------|
| H  | 3.0578297  | 1.3424206  | -3.7985856 |
| H  | 0.1969517  | -5.0471259 | -5.8873218 |
| H  | -0.0229379 | -4.2517928 | 2.1655399  |
| C  | 1.7899185  | -3.9292674 | -2.9667628 |
| C  | 4.8347676  | -0.7851138 | -3.4144800 |
| C  | 0.5234354  | -4.2831575 | -5.1518760 |
| H  | 1.0719731  | -3.4988169 | -5.7133616 |
| C  | 2.3910325  | -2.6964037 | -3.2717132 |
| C  | 2.5942578  | -4.8679474 | 1.3848675  |
| H  | 3.2681818  | -6.0728131 | -3.8902103 |
| C  | 1.5918089  | -4.2373498 | -1.6107668 |
| C  | 2.6563263  | -5.5763119 | -4.6698240 |
| H  | 2.3792165  | -6.3362772 | -5.4300491 |
| H  | 1.1207327  | -5.1999968 | -1.3520055 |
| C  | 2.5689293  | 0.3752103  | -3.5604306 |
| H  | 5.3512834  | 0.1632408  | -3.6700335 |
| H  | 5.5128950  | -1.3836971 | -2.7730050 |
| C  | 2.8151261  | -1.7997154 | -2.2749933 |
| C  | 0.1905834  | -4.1465188 | 1.0803344  |
| C  | 1.9723184  | -3.3665677 | -0.5718970 |
| H  | 3.6614369  | -4.5860604 | 1.2897613  |
| H  | 2.4470707  | -5.8103240 | 0.8152737  |
| C  | 3.4987346  | -0.5024233 | -2.7029780 |
| C  | 2.6206066  | -2.1439809 | -0.9076853 |
| C  | 1.6650189  | -3.7536249 | 0.8731835  |
| H  | 1.6245631  | 0.5914551  | -3.0241361 |
| H  | -0.4894296 | -3.3775730 | 0.6616203  |
| H  | 2.3178541  | -0.1157294 | -4.5242165 |
| H  | -0.3822701 | -3.8145896 | -4.7186055 |
| H  | -0.0625037 | -5.1190730 | 0.6061440  |
| H  | 3.2992086  | -4.8197830 | -5.1665286 |
| H  | 3.7404414  | 0.0733063  | -1.7875064 |
| H  | 1.8388686  | -2.8597091 | 1.5050993  |
| H  | 2.5532999  | -2.4245794 | -4.3269658 |
| Zn | -2.7398395 | 0.8467756  | -1.2765857 |
| Br | -4.3724154 | 1.6420658  | -2.7231088 |
| C  | -2.6323810 | -5.9032111 | -3.3676399 |
| C  | -2.8625812 | -1.6652750 | -2.9602627 |
| C  | -1.8585056 | -5.2510317 | -2.3876494 |
| C  | -3.5216339 | -3.7720270 | -4.1144439 |
| C  | -2.7454834 | -3.1150969 | -3.1336943 |
| C  | -3.4572713 | -5.1660184 | -4.2359522 |
| C  | -1.8997400 | -3.8586868 | -2.2753251 |
| O  | -2.1980808 | -1.0450220 | -2.1220568 |
| H  | -2.5891523 | -6.9997768 | -3.4564870 |
| H  | -4.1757603 | -3.1805299 | -4.7748797 |
| H  | -1.2138140 | -5.8349265 | -1.7144131 |
| H  | -4.0540184 | -5.6831061 | -5.0020871 |
| H  | -1.2915787 | -3.3203307 | -1.5323809 |
| Br | 1.1671311  | -1.4565697 | 3.8881121  |
| Zn | -0.7665819 | -1.4538189 | 2.5941241  |
| H  | -4.1960904 | -3.9197853 | -0.6891019 |
| H  | -2.8638764 | -2.3926556 | 3.8194346  |
| C  | -4.0535193 | -3.3408132 | 1.4261116  |
| C  | -4.6491841 | -3.2343719 | 0.0627128  |
| H  | -4.0957990 | -4.2541553 | 2.0344165  |
| C  | -3.4780009 | -2.1501559 | 1.7795686  |
| C  | -2.7371049 | -1.7078986 | 2.9596254  |
| C  | -3.6774914 | -1.2588988 | 0.6144519  |
| O  | -4.3735021 | -1.8837154 | -0.3589211 |
| O  | -3.2848412 | -0.0913059 | 0.4799978  |
| H  | -5.7519556 | -3.3826519 | 0.0356917  |
| H  | -3.0499191 | -0.6842780 | 3.2520670  |
| H  | -3.6144771 | -1.1198731 | -3.5902223 |

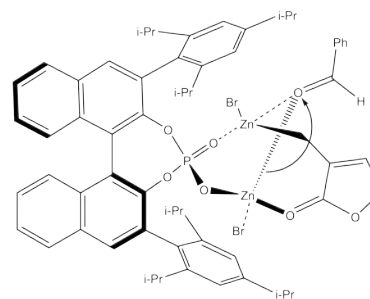

Energy(Hartree)= -11970.008075

|   |           |           |           |
|---|-----------|-----------|-----------|
| C | 1.184565  | 2.106182  | 1.607388  |
| C | 2.585112  | 2.097046  | 1.583504  |
| C | 3.263476  | 3.370925  | 1.611587  |
| C | 4.672579  | 3.502272  | 1.426007  |
| C | 2.487397  | 4.573119  | 1.804971  |
| C | 3.156014  | 5.831492  | 1.876510  |
| C | 1.067786  | 4.492702  | 1.882400  |
| H | 0.490696  | 5.417112  | 2.036357  |
| C | 0.390812  | 3.288146  | 1.736859  |
| C | 3.719441  | -1.333623 | 0.250842  |
| C | 4.793102  | -1.610570 | 1.088100  |
| H | 5.375080  | -2.530880 | 0.928077  |
| C | 5.124177  | -0.770488 | 2.189852  |
| C | 6.167815  | -1.127032 | 3.095500  |
| C | 4.366524  | 0.436492  | 2.426789  |
| C | 4.654454  | 1.192760  | 3.602290  |
| C | 3.329962  | 0.805125  | 1.491565  |
| C | 3.018786  | -0.109457 | 0.479419  |
| O | 0.502265  | 0.899172  | 1.561646  |
| O | 1.981533  | 0.190477  | -0.398378 |
| P | 0.443432  | 0.064133  | 0.149136  |
| O | -0.366707 | 0.875639  | -0.882964 |
| O | 0.033863  | -1.352963 | 0.516243  |
| C | 4.530925  | 5.919202  | 1.724480  |
| C | 5.289821  | 4.743973  | 1.480862  |
| H | 2.550748  | 6.737277  | 2.039040  |
| H | 5.032680  | 6.897314  | 1.775439  |
| H | 5.271328  | 2.602657  | 1.228789  |
| H | 6.377262  | 4.817283  | 1.327790  |
| C | 5.664038  | 0.807132  | 4.473536  |
| C | 6.440431  | -0.352902 | 4.212675  |
| H | 4.054406  | 2.086570  | 3.822109  |
| H | 5.859384  | 1.403245  | 5.377901  |
| H | 7.243412  | -0.644983 | 4.906386  |
| H | 6.742158  | -2.045461 | 2.896334  |
| C | -1.821865 | 3.693950  | 0.570775  |
| C | -1.107890 | 3.222030  | 1.709635  |
| C | -3.228037 | 3.650265  | 0.585799  |
| C | -1.823072 | 2.700096  | 2.821680  |
| C | -3.230539 | 2.698992  | 2.791937  |
| C | -3.957276 | 3.167266  | 1.685532  |
| H | -3.786061 | 4.004356  | -0.296318 |
| C | -1.109707 | 2.153003  | 4.056215  |
| H | -3.773114 | 2.299772  | 3.662723  |
| C | -1.413835 | 0.660794  | 4.283926  |
| H | -2.491037 | 0.485755  | 4.487016  |
| H | -0.846223 | 0.276378  | 5.156003  |
| H | -1.128736 | 0.055222  | 3.401732  |
| C | -1.429869 | 2.998204  | 5.302451  |
| H | -0.018272 | 2.240468  | 3.880664  |
| H | -2.508151 | 2.949781  | 5.561844  |
| H | -1.171913 | 4.064524  | 5.140662  |
| H | -0.858603 | 2.634599  | 6.181259  |
| C | -5.481699 | 3.203872  | 1.662182  |
| C | -6.145129 | 1.971937  | 2.294743  |
| H | -7.246199 | 2.015959  | 2.165464  |

## 7.2.4.6 to 15c-ma

### TS1-8-c; woelfling data

|    |           |           |           |
|----|-----------|-----------|-----------|
| H  | -5.949776 | 1.911465  | 3.385255  |
| H  | -5.780991 | 1.035265  | 1.830587  |
| C  | -5.996521 | 4.502303  | 2.313726  |
| H  | -5.778993 | 3.228930  | 0.589304  |
| H  | -7.101876 | 4.573642  | 2.241016  |
| H  | -5.558613 | 5.398730  | 1.830931  |
| H  | -5.722576 | 4.532881  | 3.389028  |
| C  | -1.110067 | 4.254635  | -0.660709 |
| C  | -1.695543 | 3.728415  | -1.980413 |
| H  | -1.023496 | 3.931019  | -2.837252 |
| H  | -2.688805 | 4.160234  | -2.216867 |
| H  | -1.863603 | 2.634435  | -1.905577 |
| C  | -1.137053 | 5.795274  | -0.666484 |
| H  | -0.052668 | 3.923549  | -0.614212 |
| H  | -0.589783 | 6.200773  | -1.542402 |
| H  | -0.679011 | 6.216724  | 0.248978  |
| H  | -2.182995 | 6.164456  | -0.715992 |
| H  | 1.462860  | -5.941505 | -3.362287 |
| H  | 5.152286  | -1.568009 | -4.288431 |
| H  | 3.413991  | -5.290069 | 2.482777  |
| C  | 1.560635  | -4.939020 | -3.834854 |
| H  | 3.591800  | 1.184631  | -3.783978 |
| H  | -0.363072 | -5.119374 | -4.901694 |
| H  | 0.936171  | -4.548142 | 2.462465  |
| C  | 2.193051  | -4.022432 | -2.793558 |
| C  | 5.331151  | -0.972381 | -3.368778 |
| C  | 0.139141  | -4.451949 | -4.170229 |
| H  | 0.167297  | -3.428673 | -4.602078 |
| C  | 2.795709  | -2.802630 | -3.145597 |
| C  | 3.509016  | -5.017333 | 1.411206  |
| H  | 3.437134  | -5.432830 | -4.866594 |
| C  | 2.127011  | -4.350713 | -1.430175 |
| C  | 2.406453  | -5.102960 | -5.105891 |
| H  | 1.951072  | -5.853979 | -5.783512 |
| H  | 1.645636  | -5.298172 | -1.138651 |
| C  | 3.089607  | 0.230190  | -3.523112 |
| H  | 5.862626  | -0.044539 | -3.666263 |
| H  | 6.005948  | -1.562207 | -2.715642 |
| C  | 3.321449  | -1.923986 | -2.181712 |
| C  | 1.056326  | -4.398997 | 1.370707  |
| C  | 2.627745  | -3.505904 | -0.422370 |
| H  | 4.552603  | -4.688704 | 1.231340  |
| H  | 3.343313  | -5.938391 | 0.813691  |
| C  | 4.008001  | -0.642886 | -2.651214 |
| C  | 3.236661  | -2.277041 | -0.806431 |
| C  | 2.480740  | -3.933206 | 1.037332  |
| H  | 2.146720  | 0.470972  | -2.995511 |
| H  | 0.308030  | -3.651909 | 1.057217  |
| H  | 2.820863  | -0.271408 | -4.475742 |
| H  | -0.488867 | -4.420487 | -3.258145 |
| H  | 0.798192  | -5.360855 | 0.881493  |
| H  | 2.479219  | -4.153082 | -5.675335 |
| H  | 4.270398  | -0.049037 | -1.751887 |
| H  | 2.683352  | -3.042894 | 1.666285  |
| H  | 2.861550  | -2.519210 | -4.207488 |
| Zn | -1.432241 | 0.654525  | -2.436011 |
| Br | -0.845049 | 0.410538  | -4.643164 |
| H  | -6.539041 | -1.962648 | -1.452617 |
| Br | -2.506951 | -3.773822 | 2.067955  |
| Zn | -1.929388 | -1.819651 | 0.915297  |
| C  | -5.481690 | -1.024171 | 0.238072  |
| C  | -6.274271 | -0.970853 | -1.020727 |
| C  | -4.263323 | -0.413070 | 0.051980  |
| C  | -3.134158 | -0.178875 | 0.939391  |
| C  | -4.258501 | -0.012500 | -1.370561 |
| O  | -5.419617 | -0.310039 | -1.973988 |
| O  | -3.369327 | 0.540176  | -2.048098 |
| H  | -7.212840 | -0.376792 | -0.937353 |
| C  | -5.085905 | -4.678591 | -2.979526 |
| C  | -4.125910 | -3.913186 | -2.310990 |
| C  | -3.154859 | -3.213659 | -3.065649 |

|   |           |           |           |
|---|-----------|-----------|-----------|
| C | -3.154431 | -3.272280 | -4.475788 |
| C | -4.113244 | -4.047953 | -5.136306 |
| C | -5.072967 | -4.751725 | -4.387755 |
| H | -5.840456 | -5.240076 | -2.407887 |
| H | -4.083406 | -3.857906 | -1.210323 |
| C | -2.104479 | -2.449120 | -2.394199 |
| H | -2.393699 | -2.704404 | -5.034766 |
| H | -4.108457 | -4.112661 | -6.234401 |
| H | -5.819304 | -5.371517 | -4.907923 |
| O | -2.038501 | -2.291869 | -1.174553 |
| H | -5.843620 | -1.481951 | 1.167989  |
| H | -1.330492 | -1.983214 | -3.061467 |
| H | -3.450076 | -0.098550 | 1.995409  |
| H | -2.561173 | 0.721341  | 0.650707  |

### TS2-8-c; COSMO

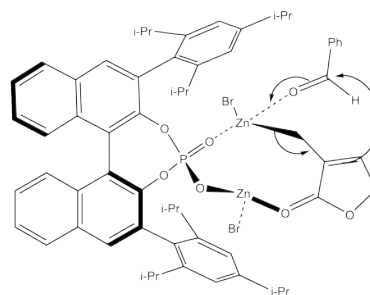

Energy(Hartree)= -11970.02587415

|   |            |            |            |
|---|------------|------------|------------|
| C | 1.0641960  | 2.5180987  | 0.9367830  |
| C | 2.4592886  | 2.4269116  | 1.0247737  |
| C | 3.1985127  | 3.6628348  | 1.1455558  |
| C | 4.6216366  | 3.7187189  | 1.0442979  |
| C | 2.4812601  | 4.9001963  | 1.3412111  |
| C | 3.2126203  | 6.1173633  | 1.4846844  |
| C | 1.0568078  | 4.8886756  | 1.3795022  |
| H | 0.5220616  | 5.8286736  | 1.5852894  |
| C | 0.3322251  | 3.7267813  | 1.1496782  |
| C | 3.4943811  | -1.1056248 | -0.1299473 |
| C | 4.4808704  | -1.4042260 | 0.8035993  |
| H | 5.0310747  | -2.3521994 | 0.7305959  |
| C | 4.7697710  | -0.5447369 | 1.9036153  |
| C | 5.7130821  | -0.9310431 | 2.9027327  |
| C | 4.0595010  | 0.7020587  | 2.0518604  |
| C | 4.2708316  | 1.4637634  | 3.2388614  |
| C | 3.1453762  | 1.1024581  | 1.0091955  |
| C | 2.8800730  | 0.1857136  | -0.0073824 |
| O | 0.2956672  | 1.3811473  | 0.7086251  |
| O | 1.9926370  | 0.5658186  | -1.0099097 |
| P | 0.3887934  | 0.5982717  | -0.7341376 |
| O | -0.1151091 | 1.4546962  | -1.9180578 |
| O | -0.2814821 | -0.7572250 | -0.5021428 |
| C | 4.5971939  | 6.1316286  | 1.4051929  |
| C | 5.3029921  | 4.9219433  | 1.1678047  |
| H | 2.6511952  | 7.0509702  | 1.6470395  |
| H | 5.1488681  | 7.0781843  | 1.5109248  |
| H | 5.1802134  | 2.7922019  | 0.8523402  |
| H | 6.3997549  | 4.9378827  | 1.0757833  |
| C | 5.1782116  | 1.0483782  | 4.2044945  |
| C | 5.9215212  | -0.1489812 | 4.0292645  |
| H | 3.6942412  | 2.3859080  | 3.3941099  |
| H | 5.3161408  | 1.6493572  | 5.1163531  |
| H | 6.6448328  | -0.4642400 | 4.7967393  |
| H | 6.2575469  | -1.8794729 | 2.7714377  |
| C | -1.9369729 | 4.0346842  | 0.0567613  |
| C | -1.1652119 | 3.6771372  | 1.1941888  |
| C | -3.3388104 | 3.9627699  | 0.1422651  |

|   |            |            |            |    |            |            |            |
|---|------------|------------|------------|----|------------|------------|------------|
| C | -1.8054938 | 3.2179412  | 2.3784471  | H  | 2.7521854  | -3.0452106 | 1.3769421  |
| C | -3.2112724 | 3.1396368  | 2.4016425  | H  | 1.8384502  | -2.0150368 | -4.3989053 |
| C | -3.9982953 | 3.5055520  | 1.2960283  | Zn | -1.7801235 | 1.2309442  | -2.8506798 |
| H | -3.9509556 | 4.2440237  | -0.7297619 | Br | -2.3118184 | 0.8244188  | -5.0316552 |
| C | -0.9917102 | 2.8557276  | 3.6211312  | H  | -4.2202840 | -3.1288580 | -2.1036014 |
| H | -3.7031138 | 2.7721555  | 3.3130261  | Br | 0.6896592  | -1.1402366 | 3.0698705  |
| C | -1.6022107 | 1.7281706  | 4.4650678  | Zn | -0.8536448 | -1.4121725 | 1.3389496  |
| H | -2.5587897 | 2.0288027  | 4.9415449  | C  | -3.9728440 | -2.3755464 | -0.0316117 |
| H | -0.9039652 | 1.4470599  | 5.2784958  | C  | -4.5090871 | -2.2945471 | -1.4329840 |
| H | -1.7760694 | 0.8173816  | 3.8598888  | C  | -3.4572981 | -1.0932609 | 0.2969083  |
| C | -0.7468722 | 4.1129160  | 4.4797675  | C  | -2.8961462 | -0.5785573 | 1.4755646  |
| H | -0.0023159 | 2.4891194  | 3.2762507  | C  | -3.3644845 | -0.3776409 | -0.9934586 |
| H | -1.7085253 | 4.5281733  | 4.8481277  | O  | -3.9299298 | -1.0769353 | -1.9790552 |
| H | -0.2347102 | 4.9080772  | 3.9021148  | O  | -2.8433682 | 0.7327661  | -1.2049884 |
| H | -0.1172639 | 3.8709462  | 5.3609180  | H  | -5.6139948 | -2.1849430 | -1.4803146 |
| C | -5.5136092 | 3.3345437  | 1.2736117  | C  | -3.5512144 | -6.9436367 | 0.6574283  |
| C | -5.8782719 | 1.9962059  | 0.5969160  | C  | -3.0231805 | -5.6578972 | 0.8248080  |
| H | -6.9786493 | 1.8760347  | 0.5156887  | C  | -2.7355906 | -4.8559502 | -0.3017503 |
| H | -5.4796670 | 1.1428303  | 1.1850270  | C  | -2.9658815 | -5.3728726 | -1.5955745 |
| H | -5.4452414 | 1.9302417  | -0.4215521 | C  | -3.4937584 | -6.6631553 | -1.7604001 |
| C | -6.1802512 | 3.4536677  | 2.6502473  | C  | -3.7923388 | -7.4485599 | -0.6348753 |
| H | -5.9161525 | 4.1498326  | 0.6312608  | H  | -3.7719437 | -7.5641994 | 1.5396470  |
| H | -7.2842858 | 3.4379742  | 2.5486851  | H  | -2.8114879 | -5.2533669 | 1.8261339  |
| H | -5.8951496 | 4.3940788  | 3.1637636  | C  | -2.1580338 | -3.4954018 | -0.1267468 |
| H | -5.9037344 | 2.6077608  | 3.3137512  | H  | -2.7036443 | -4.7701263 | -2.4794636 |
| C | -1.2675517 | 4.4539906  | -1.2512906 | H  | -3.6623874 | -7.0601712 | -2.7730851 |
| C | -2.0516317 | 3.9970547  | -2.4950725 | H  | -4.2044076 | -8.4612601 | -0.7631196 |
| H | -1.3958938 | 3.9030110  | -3.3838776 | O  | -1.5519540 | -3.2165647 | 0.9729373  |
| H | -2.8699611 | 4.6932420  | -2.7723078 | H  | -4.4459128 | -3.0335734 | 0.7096861  |
| H | -2.5931654 | 3.0395211  | -2.2976398 | H  | -1.8045476 | -3.0104886 | -1.0689809 |
| C | -1.0210016 | 5.9726248  | -1.3231966 | H  | -3.1969807 | -1.0214721 | 2.4384498  |
| H | -0.2818022 | 3.9465036  | -1.2819532 | H  | -2.6357816 | 0.4949762  | 1.4844196  |
| H | -0.5351709 | 6.2488171  | -2.2819334 |    |            |            |            |
| H | -0.3648286 | 6.3148108  | -0.5005003 |    |            |            |            |
| H | -1.9786641 | 6.5290911  | -1.2489387 |    |            |            |            |
| H | -0.3906171 | -4.8564155 | -3.1919407 |    |            |            |            |
| H | 4.6183003  | -1.8427201 | -4.6182303 |    |            |            |            |
| H | 4.0847431  | -5.1488772 | 1.5621071  |    |            |            |            |
| C | 0.0790181  | -4.0384339 | -3.7821428 |    |            |            |            |
| H | 3.6431804  | 1.2320808  | -4.3343926 |    |            |            |            |
| H | -1.8528298 | -3.4710108 | -4.6764626 |    |            |            |            |
| H | 1.6364742  | -4.9872696 | 2.3009043  |    |            |            |            |
| C | 1.1509480  | -3.4188910 | -2.8964682 |    |            |            |            |
| C | 4.9304133  | -1.2043026 | -3.7650417 |    |            |            |            |
| C | -1.0161793 | -3.0056858 | -4.1140329 |    |            |            |            |
| H | -0.6213224 | -2.1750550 | -4.7346271 |    |            |            |            |
| C | 1.9361517  | -2.3465832 | -3.3535524 |    |            |            |            |
| C | 3.7846450  | -4.7723156 | 0.5619615  |    |            |            |            |
| H | 1.4264775  | -5.4290051 | -4.8221844 |    |            |            |            |
| C | 1.3700900  | -3.8810263 | -1.5886904 |    |            |            |            |
| C | 0.6598227  | -4.6647904 | -5.0615933 |    |            |            |            |
| H | -0.1371215 | -5.1509189 | -5.6618451 |    |            |            |            |
| H | 0.8071011  | -4.7615076 | -1.2420801 |    |            |            |            |
| C | 2.9752962  | 0.3956276  | -4.0430598 |    |            |            |            |
| H | 5.6215726  | -0.4277289 | -4.1543153 |    |            |            |            |
| H | 5.4935711  | -1.8439940 | -3.0554765 |    |            |            |            |
| C | 2.8162692  | -1.6576785 | -2.5043958 |    |            |            |            |
| C | 1.3759013  | -4.6762574 | 1.2690177  |    |            |            |            |
| C | 2.2550173  | -3.2422583 | -0.6980348 |    |            |            |            |
| H | 4.6520086  | -4.2483093 | 0.1133574  |    |            |            |            |
| H | 3.5704654  | -5.6499196 | -0.0837084 |    |            |            |            |
| C | 3.7056045  | -0.5587252 | -3.0849543 |    |            |            |            |
| C | 2.9153693  | -2.0510569 | -1.1368358 |    |            |            |            |
| C | 2.5343382  | -3.8703027 | 0.6666648  |    |            |            |            |
| H | 2.0701792  | 0.8249879  | -3.5711327 |    |            |            |            |
| H | 0.4417299  | -4.0886121 | 1.3189296  |    |            |            |            |
| H | 2.6675278  | -0.1130035 | -4.9804660 |    |            |            |            |
| H | -1.4332141 | -2.5421322 | -3.1961455 |    |            |            |            |
| H | 1.1666423  | -5.6030837 | 0.6939407  |    |            |            |            |
| H | 1.1380887  | -3.8963769 | -5.7042028 |    |            |            |            |
| H | 4.0928429  | 0.0478890  | -2.2413130 |    |            |            |            |

### TS2-8-c

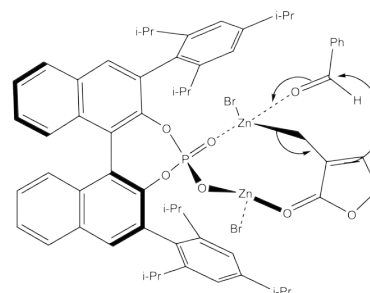

Energy(Hartree)= -11970.01365281  
number of imaginary frequencies: 1

|   |           |            |            |
|---|-----------|------------|------------|
| C | 1.0653210 | 2.5213717  | 0.9312566  |
| C | 2.4602431 | 2.4314784  | 1.0226128  |
| C | 3.1974645 | 3.6681445  | 1.1465425  |
| C | 4.6205119 | 3.7252653  | 1.0491287  |
| C | 2.4790173 | 4.9045263  | 1.3425170  |
| C | 3.2094265 | 6.1212516  | 1.4896445  |
| C | 1.0547959 | 4.8908715  | 1.3781701  |
| H | 0.5173390 | 5.8290114  | 1.5858152  |
| C | 0.3317881 | 3.7288804  | 1.1449663  |
| C | 3.4935541 | -1.1032434 | -0.1258297 |
| C | 4.4782088 | -1.4010355 | 0.8096657  |
| H | 5.0250448 | -2.3510866 | 0.7396523  |
| C | 4.7683320 | -0.5398868 | 1.9075739  |
| C | 5.7098983 | -0.9252226 | 2.9079647  |
| C | 4.0597738 | 0.7079731  | 2.0530501  |
| C | 4.2709391 | 1.4709972  | 3.2389234  |
| C | 3.1474147 | 1.1077045  | 1.0085398  |
| C | 2.8827767 | 0.1900755  | -0.0072902 |
| O | 0.2969758 | 1.3852556  | 0.7001513  |
| O | 1.9984301 | 0.5705620  | -1.0125862 |
| P | 0.3950420 | 0.6018985  | -0.7416658 |

|   |            |            |            |    |            |            |            |
|---|------------|------------|------------|----|------------|------------|------------|
| O | -0.1109490 | 1.4566209  | -1.9265324 | H  | 5.6204196  | -0.4524008 | -4.1555952 |
| O | -0.2779319 | -0.7534096 | -0.5137601 | H  | 5.4843177  | -1.8638601 | -3.0516125 |
| C | 4.5936255  | 6.1367397  | 1.4139019  | C  | 2.8108460  | -1.6593228 | -2.4974132 |
| C | 5.3004505  | 4.9283163  | 1.1766684  | C  | 1.3837467  | -4.6776321 | 1.2852736  |
| H | 2.6469792  | 7.0542713  | 1.6519127  | C  | 2.2497432  | -3.2394841 | -0.6870302 |
| H | 5.1441657  | 7.0835535  | 1.5226523  | H  | 4.6496420  | -4.2437628 | 0.1047854  |
| H | 5.1789839  | 2.7986606  | 0.8580018  | H  | 3.5697027  | -5.6458771 | -0.0835808 |
| H | 6.3974110  | 4.9448428  | 1.0879961  | C  | 3.7050526  | -0.5668225 | -3.0826603 |
| C | 5.1772917  | 1.0562354  | 4.2051286  | C  | 2.9113777  | -2.0501999 | -1.1293687 |
| C | 5.9189429  | -0.1417432 | 4.0326249  | C  | 2.5361001  | -3.8684425 | 0.6758913  |
| H | 3.6944415  | 2.3933703  | 3.3921648  | H  | 2.0796752  | 0.8292658  | -3.5699297 |
| H | 5.3147463  | 1.6583489  | 5.1162032  | H  | 0.4497854  | -4.0913860 | 1.3487784  |
| H | 6.6408739  | -0.4570222 | 4.8012840  | H  | 2.6659750  | -0.1188049 | -4.9776410 |
| H | 6.2519672  | -1.8752838 | 2.7790294  | H  | -1.4437182 | -2.5327073 | -3.2012961 |
| C | -1.9384343 | 4.0311127  | 0.0520927  | H  | 1.1695175  | -5.6027884 | 0.7092835  |
| C | -1.1654680 | 3.6759814  | 1.1893207  | H  | 1.1371981  | -3.9148425 | -5.6852662 |
| C | -3.3396698 | 3.9547430  | 0.1386286  | H  | 4.0970421  | 0.0396740  | -2.2411318 |
| C | -1.8035756 | 3.2145481  | 2.3737932  | H  | 2.7563019  | -3.0445056 | 1.3868356  |
| C | -3.2088683 | 3.1319812  | 2.3972258  | H  | 1.8283945  | -2.0173774 | -4.3887159 |
| C | -3.9972016 | 3.4958669  | 1.2923814  | Zn | -1.7626739 | 1.1883510  | -2.8631312 |
| H | -3.9529712 | 4.2348385  | -0.7329624 | Br | -2.3410306 | 0.8136079  | -5.0286522 |
| C | -0.9883228 | 2.8542519  | 3.6161798  | H  | -4.2463057 | -3.1165309 | -2.0899598 |
| H | -3.6985896 | 2.7629792  | 3.3090315  | Br | 0.7017453  | -1.1307460 | 3.0656229  |
| C | -1.5953990 | 1.7267875  | 4.4624798  | Zn | -0.8206778 | -1.4215459 | 1.3321515  |
| H | -2.5513156 | 2.0261751  | 4.9412741  | C  | -3.9747552 | -2.3688779 | -0.0216718 |
| H | -0.8952006 | 1.4469035  | 5.2743565  | C  | -4.5261562 | -2.2809965 | -1.4162652 |
| H | -1.7672387 | 0.8138781  | 3.8602936  | C  | -3.4495893 | -1.0909420 | 0.3062433  |
| C | -0.7444678 | 4.1126264  | 4.4731348  | C  | -2.8726926 | -0.5837816 | 1.4795086  |
| H | 0.0010596  | 2.4880316  | 3.2710282  | C  | -3.3662343 | -0.3724114 | -0.9835978 |
| H | -1.7060911 | 4.5280079  | 4.8410095  | O  | -3.9504072 | -1.0662013 | -1.9648316 |
| H | -0.2328480 | 4.9075563  | 3.8950677  | O  | -2.8388510 | 0.7324052  | -1.2028271 |
| H | -0.1147023 | 3.8723335  | 5.3544948  | H  | -5.6320348 | -2.1684225 | -1.4532583 |
| C | -5.5122370 | 3.3215808  | 1.2710139  | C  | -3.5367684 | -6.9400060 | 0.6305763  |
| C | -5.8760193 | 1.9838402  | 0.5928683  | C  | -2.9984775 | -5.6592284 | 0.7992834  |
| H | -6.9762680 | 1.8608184  | 0.5132400  | C  | -2.7292731 | -4.8483716 | -0.3252418 |
| H | -5.4740254 | 1.1304251  | 1.1785588  | C  | -2.9849811 | -5.3533455 | -1.6189507 |
| H | -5.4447316 | 1.9203640  | -0.4264702 | C  | -3.5231969 | -6.6389011 | -1.7844510 |
| C | -6.1779912 | 3.4380087  | 2.6481997  | C  | -3.8057222 | -7.4318987 | -0.6607144 |
| H | -5.9170429 | 4.1376223  | 0.6307926  | H  | -3.7426007 | -7.5679680 | 1.5111138  |
| H | -7.2821901 | 3.4217743  | 2.5488699  | H  | -2.7606504 | -5.2633444 | 1.7982106  |
| H | -5.8925744 | 4.3773373  | 3.1630698  | C  | -2.1443505 | -3.4920057 | -0.1469998 |
| H | -5.9004757 | 2.5912781  | 3.3101266  | H  | -2.7307035 | -4.7451589 | -2.5014629 |
| C | -1.2708248 | 4.4540697  | -1.2558873 | H  | -3.7112542 | -7.0273823 | -2.7970214 |
| C | -2.0569658 | 4.0042039  | -2.5007788 | H  | -4.2253369 | -8.4412928 | -0.7899714 |
| H | -1.4031693 | 3.9185834  | -3.3917667 | O  | -1.5357206 | -3.2179674 | 0.9491887  |
| H | -2.8768010 | 4.7022046  | -2.7697319 | H  | -4.4315950 | -3.0359679 | 0.7214461  |
| H | -2.5874705 | 3.0395007  | -2.3162975 | H  | -1.8048618 | -2.9962391 | -1.0887497 |
| C | -1.0213657 | 5.9724589  | -1.3209529 | H  | -3.1604569 | -1.0299745 | 2.4446930  |
| H | -0.2863690 | 3.9441209  | -1.2904368 | H  | -2.6027005 | 0.4871374  | 1.4906901  |
| H | -0.5383411 | 6.2535032  | -2.2797384 |    |            |            |            |
| H | -0.3609784 | 6.3092259  | -0.4996928 |    |            |            |            |
| H | -1.9772335 | 6.5309718  | -1.2397074 |    |            |            |            |
| H | -0.4063341 | -4.8496727 | -3.1727747 |    |            |            |            |
| H | 4.6074768  | -1.8625185 | -4.6122565 |    |            |            |            |
| H | 4.0953237  | -5.1455986 | 1.5586275  |    |            |            |            |
| C | 0.0684114  | -4.0376415 | -3.7673434 |    |            |            |            |
| H | 3.6528054  | 1.2199070  | -4.3382256 |    |            |            |            |
| H | -1.8569032 | -3.4698436 | -4.6780503 |    |            |            |            |
| H | 1.6534781  | -4.9914047 | 2.3136772  |    |            |            |            |
| C | 1.1398880  | -3.4162396 | -2.8822207 |    |            |            |            |
| C | 4.9245956  | -1.2226310 | -3.7622089 |    |            |            |            |
| C | -1.0219813 | -3.0043977 | -4.1128582 |    |            |            |            |
| H | -0.6238643 | -2.1785066 | -4.7374418 |    |            |            |            |
| C | 1.9266080  | -2.3469863 | -3.3428087 |    |            |            |            |
| C | 3.7868751  | -4.7685900 | 0.5612491  |    |            |            |            |
| H | 1.4166301  | -5.4399419 | -4.7898239 |    |            |            |            |
| C | 1.3607962  | -3.8769086 | -1.5744153 |    |            |            |            |
| C | 0.6529646  | -4.6761947 | -5.0389899 |    |            |            |            |
| H | -0.1417218 | -5.1647289 | -5.6403217 |    |            |            |            |
| H | 0.7979753  | -4.7564320 | -1.2251079 |    |            |            |            |
| C | 2.9795314  | 0.3896251  | -4.0420561 |    |            |            |            |

### int1-8-c; COSMO

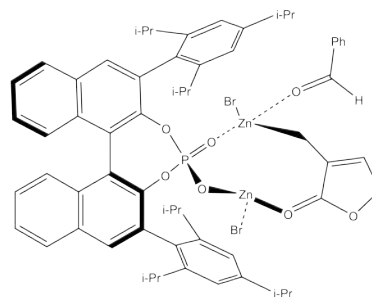

Energy(Hartree)= -11970.03616101

|   |           |           |            |
|---|-----------|-----------|------------|
| C | 0.8967445 | 2.3455837 | 0.9304137  |
| C | 2.2347804 | 2.3520389 | 0.5243414  |
| C | 2.7870728 | 3.5965689 | 0.0464013  |
| C | 4.0762649 | 3.6896184 | -0.5593009 |
| C | 1.9953123 | 4.7984884 | 0.1580041  |
| C | 2.5462045 | 6.0397998 | -0.2822828 |
| C | 0.6723593 | 4.7250584 | 0.6807505  |

|   |            |            |            |    |            |            |            |
|---|------------|------------|------------|----|------------|------------|------------|
| H | 0.0931435  | 5.6543175  | 0.7901520  | H  | 0.6280497  | -7.1794508 | -4.2802672 |
| C | 0.0830546  | 3.5139582  | 1.0279962  | H  | 0.7515902  | -3.9645052 | 3.0588097  |
| C | 3.3730951  | -1.2762289 | -0.0688030 | C  | 2.2051877  | -4.9280359 | -2.0968277 |
| C | 4.6289314  | -1.2601975 | 0.5272458  | C  | 4.6480411  | -1.7235708 | -3.8918053 |
| H | 5.2675686  | -2.1537223 | 0.4561950  | C  | 0.8180386  | -6.1824999 | -3.8317258 |
| C | 5.1049767  | -0.1310408 | 1.2521675  | H  | 1.0868039  | -5.4924236 | -4.6589235 |
| C | 6.3580064  | -0.1684663 | 1.9350356  | C  | 2.6330237  | -3.8007868 | -2.8234338 |
| C | 4.2964558  | 1.0622256  | 1.3224921  | C  | 3.4317825  | -4.1436172 | 2.2181987  |
| C | 4.7590013  | 2.1426408  | 2.1334671  | H  | 4.0285605  | -6.9328003 | -2.6235637 |
| C | 3.0463828  | 1.1035119  | 0.6008013  | C  | 2.0609519  | -4.7935640 | -0.7057489 |
| C | 2.6039869  | -0.0758945 | -0.0099051 | C  | 3.2310299  | -6.8396882 | -3.3880508 |
| O | 0.3243705  | 1.1452970  | 1.3335859  | H  | 3.0504110  | -7.8443438 | -3.8234935 |
| O | 1.3768026  | -0.0821486 | -0.6688846 | H  | 1.6975016  | -5.6589680 | -0.1292823 |
| P | -0.0086016 | 0.0013456  | 0.2096584  | C  | 2.2472257  | -0.8691678 | -3.9108944 |
| O | -1.0501879 | 0.5250236  | -0.7917274 | H  | 4.9890342  | -8.5252387 | -4.4465359 |
| O | -0.2921269 | -1.2746838 | 0.9944228  | H  | 5.4868718  | -2.0752618 | -3.2573383 |
| C | 3.8126146  | 6.0986582  | -0.8443719 | C  | 2.9635228  | -2.5856471 | -2.1929405 |
| C | 4.5750372  | 4.9093836  | -0.9958867 | C  | 0.9183878  | -4.1906498 | 1.9873046  |
| H | 1.9355419  | 6.9507833  | -0.1806003 | C  | 2.3811432  | -3.6028696 | -0.0235429 |
| H | 4.2226028  | 7.0609277  | -1.1869553 | H  | 4.3770469  | -3.6319683 | 1.9514210  |
| H | 4.6740229  | 2.7766672  | -0.6894023 | H  | 3.5441849  | -5.2170720 | 1.9570117  |
| H | 5.5683868  | 4.9536474  | -1.4680348 | C  | 3.4062190  | -1.3966743 | -3.0440564 |
| C | 5.9732239  | 2.0674323  | 2.8020946  | C  | 2.8748053  | -2.5013403 | -0.7759885 |
| C | 6.7899457  | 0.9102408  | 2.6917504  | C  | 2.2161703  | -3.5322355 | 1.4941622  |
| H | 4.1350690  | 3.0409087  | 2.2378992  | H  | 1.3741059  | -0.5832153 | -3.2921176 |
| H | 6.3021815  | 2.9107765  | 3.4283207  | H  | 0.0316087  | -3.8099845 | 1.4475010  |
| H | 7.7543636  | 0.8660503  | 3.2202880  | H  | 1.9114015  | -1.6315092 | -4.6452932 |
| H | 6.9685431  | -1.0822010 | 1.8617921  | H  | -0.1303355 | -5.8187294 | -3.3891498 |
| C | -2.3921832 | 3.7085354  | 0.5718794  | H  | 0.9440720  | -5.2954352 | 1.8826055  |
| C | -1.3398721 | 3.4415634  | 1.4918973  | H  | 3.6175049  | -6.1868732 | -4.1988486 |
| C | -3.7155801 | 3.7652962  | 1.0489988  | H  | 3.6949830  | -0.5791807 | -2.3522188 |
| C | -1.6474750 | 3.1430258  | 2.8489661  | H  | 2.1584465  | -2.4577012 | 1.7660632  |
| C | -2.9893277 | 3.1949496  | 3.2681999  | H  | 2.7270529  | -3.8706550 | -3.9194179 |
| C | -4.0386106 | 3.5291220  | 2.3946445  | Zn | -2.2964044 | 0.2698161  | -2.2191441 |
| H | -4.5334905 | 3.9873435  | 0.3445761  | Br | -1.8081225 | 0.5106639  | -4.4487137 |
| C | -0.5748127 | 2.7745627  | 3.8718790  | H  | -6.7527934 | -2.8274915 | 0.2363852  |
| H | -3.2198638 | 2.9685453  | 4.3215105  | Br | -2.2882048 | -2.9638945 | 3.6410792  |
| C | -0.7898420 | 1.3527042  | 4.4249190  | Zn | -2.2046524 | -1.6173437 | 1.7173712  |
| H | -1.7433709 | 1.2715022  | 4.9872322  | C  | -5.7855894 | -1.1761130 | 1.3012649  |
| H | 0.0300913  | 1.0771025  | 5.1195998  | C  | -6.6332028 | -1.7212103 | 0.2081502  |
| H | -0.8118714 | 0.6003195  | 3.6126202  | C  | -4.6540457 | -0.5972642 | 0.7785376  |
| C | -0.4912766 | 3.8173696  | 5.0018102  | C  | -3.4635576 | -0.0393607 | 1.4100210  |
| H | 0.4065921  | 2.7825114  | 3.3564512  | C  | -4.7973218 | -0.7449353 | -0.6836240 |
| H | -1.4332012 | 3.8598284  | 5.5877424  | O  | -5.9275653 | -1.3906084 | -1.0078663 |
| H | -0.2996975 | 4.8327668  | 4.5987923  | O  | -4.0631491 | -0.3584298 | -1.6179532 |
| H | 0.3286702  | 3.5659107  | 5.7058608  | H  | -7.6497369 | -1.2742913 | 0.1400798  |
| C | -5.4830827 | 3.5946396  | 2.8753359  | C  | -3.5024064 | -3.1974068 | -4.3055912 |
| C | -6.0232218 | 2.1968417  | 3.2309520  | C  | -3.2975706 | -3.1274376 | -2.9266024 |
| H | -7.0848627 | 2.2533126  | 3.5497965  | C  | -1.9753929 | -3.0582619 | -2.4175436 |
| H | -5.4452906 | 1.7453777  | 4.0647116  | C  | -0.8729012 | -3.0597474 | -3.3049547 |
| H | -5.9572244 | 1.5068658  | 2.3662303  | C  | -1.0884575 | -3.1189643 | -4.6856689 |
| C | -5.6574937 | 4.5768782  | 4.0468184  | C  | -2.3995914 | -3.1897105 | -5.1838532 |
| H | -6.0867978 | 3.9781297  | 2.0232454  | H  | -4.5249134 | -3.2497287 | -4.7082703 |
| H | -6.7265471 | 4.6643957  | 4.3308046  | H  | -4.1450208 | -3.1279508 | -2.2263640 |
| H | -5.2860484 | 5.5882311  | 3.7850207  | C  | -1.7056904 | -2.9381944 | -0.9860793 |
| H | -5.1028637 | 4.2368818  | 4.9462851  | H  | 0.1507317  | -3.0047222 | -2.9015883 |
| C | -2.1330233 | 3.8739754  | -0.9256137 | H  | -0.2331151 | -3.1030181 | -5.3770280 |
| C | -3.1257174 | 3.0520654  | -1.7666517 | H  | -2.5692274 | -3.2314885 | -6.2706621 |
| H | -2.7673706 | 2.9352566  | -2.8095641 | O  | -2.5834077 | -2.7591483 | -0.1244648 |
| H | -4.1310718 | 3.5182398  | -1.8203927 | H  | -6.0320049 | -1.2766217 | 2.3665398  |
| H | -3.3009858 | 2.0545485  | -1.3034134 | H  | -0.6273546 | -2.9692425 | -0.6866591 |
| C | -2.1604630 | 5.3455162  | -1.3765931 | H  | -3.6717902 | 0.3653978  | 2.4176781  |
| H | -1.1200085 | 3.4700908  | -1.1299621 | H  | -2.9730076 | 0.7385302  | 0.7970174  |
| H | -1.9762374 | 5.4264678  | -2.4678039 |    |            |            |            |
| H | -1.3907871 | 5.9479310  | -0.8567991 |    |            |            |            |
| H | -3.1485834 | 5.8038222  | -1.1618583 |    |            |            |            |
| H | 1.5992533  | -6.9661580 | -1.9874285 |    |            |            |            |
| H | 4.4372431  | -2.5154181 | -4.6407944 |    |            |            |            |
| H | 3.3049902  | -4.0728662 | 3.3182056  |    |            |            |            |
| C | 1.9377538  | -6.2642270 | -2.7808930 |    |            |            |            |
| H | 2.5618325  | 0.0270722  | -4.4844200 |    |            |            |            |

int1-8-c

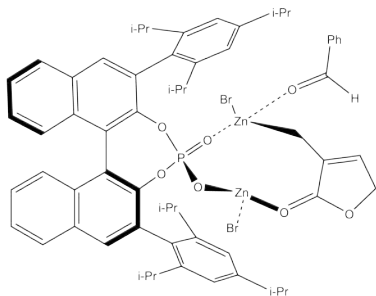

Energy(Hartree)= -11970.017472

|   |            |            |            |
|---|------------|------------|------------|
| C | 1.0957554  | 2.3469079  | 1.0535714  |
| C | 2.4875454  | 2.3818619  | 0.9058911  |
| C | 3.1083014  | 3.6563741  | 0.6354873  |
| C | 4.4916171  | 3.7899099  | 0.3080927  |
| C | 2.2959298  | 4.8491222  | 0.6591015  |
| C | 2.9085994  | 6.1162860  | 0.4235491  |
| C | 0.8947942  | 4.7399105  | 0.8873144  |
| H | 0.2891738  | 5.6583085  | 0.9286300  |
| C | 0.2665206  | 3.5096459  | 1.0433363  |
| C | 3.6811813  | -1.1621040 | 0.0350019  |
| C | 4.8207536  | -1.2694438 | 0.8228885  |
| H | 5.4472819  | -2.1701778 | 0.7416826  |
| C | 5.1879916  | -0.2598821 | 1.7594259  |
| C | 6.3139103  | -0.4273492 | 2.6199815  |
| C | 4.3981223  | 0.9444155  | 1.8632975  |
| C | 4.7437857  | 1.8977843  | 2.8670519  |
| C | 3.2786644  | 1.1197646  | 0.9716837  |
| C | 2.9355829  | 0.0501368  | 0.1409751  |
| O | 0.4696376  | 1.1202345  | 1.2675109  |
| O | 1.8257153  | 0.1813809  | -0.6909075 |
| P | 0.3424188  | 0.0926695  | -0.0086875 |
| O | -0.5864949 | 0.7248859  | -1.0685968 |
| O | 0.0002505  | -1.2868759 | 0.5344162  |
| C | 4.2616348  | 6.2126606  | 0.1381444  |
| C | 5.0529322  | 5.0356410  | 0.0653402  |
| H | 2.2777482  | 7.0185055  | 0.4584068  |
| H | 4.7203545  | 7.1956932  | -0.0477802 |
| H | 5.1145085  | 2.8877177  | 0.2392948  |
| H | 6.1207500  | 5.1099071  | -0.1910679 |
| C | 5.8356725  | 1.6953794  | 3.6994536  |
| C | 6.6375815  | 0.5307575  | 3.5683845  |
| H | 4.1247773  | 2.7983371  | 2.9838799  |
| H | 6.0770155  | 2.4412414  | 4.4720715  |
| H | 7.5043499  | 0.3836248  | 4.2305126  |
| H | 6.9136865  | -1.3462146 | 2.5254892  |
| C | -2.1030729 | 3.5502833  | 0.1372135  |
| C | -1.2171182 | 3.4194846  | 1.2424409  |
| C | -3.4899046 | 3.5657883  | 0.3810803  |
| C | -1.7363802 | 3.2453782  | 2.5539222  |
| C | -3.1303859 | 3.2589271  | 2.7393434  |
| C | -4.0269526 | 3.4346289  | 1.6721057  |
| H | -4.1864808 | 3.6814253  | -0.4651212 |
| C | -0.8271218 | 3.0401861  | 3.7634244  |
| H | -3.5265262 | 3.1283710  | 3.7592159  |
| C | -1.0168793 | 1.6417524  | 4.3774212  |
| H | -2.0473665 | 1.4995625  | 4.7651947  |
| H | -0.3201261 | 1.4855295  | 5.2260308  |
| H | -0.8227341 | 0.8376081  | 3.6419043  |
| C | -1.0134322 | 4.1553028  | 4.8079955  |
| H | 0.2222968  | 3.1039636  | 3.4101817  |
| H | -2.0372933 | 4.1478215  | 5.2369927  |
| H | -0.8425017 | 5.1575635  | 4.3647940  |
| H | -0.3016954 | 4.0242852  | 5.6488249  |
| C | -5.5322938 | 3.4806456  | 1.9028459  |
| C | -6.0627651 | 2.1729857  | 2.5165886  |
| H | -7.1657054 | 2.2108758  | 2.6342746  |

|    |            |            |            |
|----|------------|------------|------------|
| H  | -5.6279081 | 1.9937379  | 3.5222614  |
| H  | -5.8099478 | 1.2988111  | 1.8840589  |
| C  | -5.9318183 | 4.7008329  | 2.7524581  |
| H  | -6.0073421 | 3.5979455  | 0.9034286  |
| H  | -7.0340311 | 4.7623311  | 2.8661673  |
| H  | -5.5784097 | 5.6454039  | 2.2924084  |
| H  | -5.4929646 | 4.6401715  | 3.7702343  |
| C  | -1.5872431 | 3.6563178  | -1.2981538 |
| C  | -2.4467501 | 2.8537571  | -2.2961906 |
| H  | -1.8763041 | 2.6252154  | -3.2213610 |
| H  | -3.3585447 | 3.3997564  | -2.6157892 |
| H  | -2.8287574 | 1.9180277  | -1.8272234 |
| C  | -1.4717403 | 5.1178140  | -1.7695604 |
| H  | -0.5733751 | 3.2098419  | -1.3098201 |
| H  | -1.1028275 | 5.1684176  | -2.8150626 |
| H  | -0.7691674 | 5.6927510  | -1.1365634 |
| H  | -2.4581132 | 5.6255343  | -1.7282907 |
| H  | 1.8163474  | -6.2650183 | -3.1164710 |
| H  | 5.0253335  | -1.7230360 | -4.5119058 |
| H  | 3.5856475  | -4.7195197 | 2.7294363  |
| C  | 1.6986963  | -5.2848643 | -3.6307852 |
| H  | 3.2781205  | 0.9435365  | -4.1756097 |
| H  | -0.2745142 | -5.8138185 | -4.4629644 |
| H  | 1.0363774  | -4.3465303 | 2.5839867  |
| C  | 2.2797586  | -4.2282149 | -2.6975311 |
| C  | 5.1890140  | -1.0389184 | -3.6530717 |
| C  | 0.1879922  | -5.0394001 | -3.8155578 |
| H  | 0.0091428  | -4.0471394 | -4.2815809 |
| C  | 2.8186861  | -3.0228940 | -3.1738262 |
| C  | 3.6784746  | -4.5625011 | 1.6349889  |
| H  | 3.5058678  | -5.5119572 | -4.8644728 |
| C  | 2.2118246  | -4.1063755 | -1.3052172 |
| C  | 2.4116532  | -5.3821487 | -4.9864636 |
| H  | 2.0249021  | -6.2432976 | -5.5685587 |
| H  | 1.7798688  | -5.3476325 | -0.9182954 |
| C  | 2.8592568  | -0.0193620 | -3.8167299 |
| H  | 5.6361064  | -0.1035966 | -4.0494314 |
| H  | 5.9301741  | -1.5173695 | -2.9811129 |
| C  | 3.2872110  | -2.0195886 | -2.3059965 |
| C  | 1.1681461  | -4.3406028 | 1.4841054  |
| C  | 2.6548829  | -3.4382080 | -0.3905277 |
| H  | 4.6656572  | -4.0994625 | 1.4391553  |
| H  | 3.6781168  | -5.5597995 | 1.1465494  |
| C  | 3.8716299  | -0.7442968 | -2.9116602 |
| C  | 3.2160256  | -2.2329967 | -0.9023277 |
| C  | 2.5141125  | -3.7006357 | 1.1089466  |
| H  | 1.9186143  | 0.1942702  | -3.2734580 |
| H  | 0.3225612  | -3.7652410 | 1.0658858  |
| H  | 2.6001862  | -0.6223698 | -4.7115871 |
| H  | -0.3403643 | -5.0511429 | -2.8414817 |
| H  | 1.0909128  | -5.3903208 | 1.1303526  |
| H  | 2.2451182  | -4.4745837 | -5.6033848 |
| H  | 4.1215087  | -0.0545540 | -2.0800445 |
| H  | 2.5536114  | -2.7173894 | 1.6220969  |
| H  | 2.8752814  | -2.8469335 | -4.2585258 |
| Zn | -1.7877999 | 0.0321613  | -2.3683877 |
| Br | -1.3110095 | -0.6468507 | -4.5053355 |
| H  | -6.2591790 | -2.9971985 | 0.1440411  |
| Br | -0.9828848 | -2.3312208 | 3.9600912  |
| Zn | -1.5985880 | -1.5600216 | 1.8476367  |
| C  | -5.3187691 | -1.3471643 | 1.2445419  |
| C  | -6.1499536 | -1.8880948 | 0.1354211  |
| C  | -4.1820532 | -0.7587692 | 0.7405068  |
| C  | -3.0223081 | -0.1509948 | 1.3768256  |
| C  | -4.3044399 | -0.9127914 | -0.7251886 |
| O  | -5.4373508 | -1.5440453 | -1.0683847 |
| O  | -3.5335718 | -0.5533888 | -1.6374863 |
| H  | -7.1703377 | -1.4494724 | 0.0632475  |
| C  | -4.9153774 | -5.5319458 | -1.7884790 |
| C  | -4.0164085 | -4.8725038 | -0.9467952 |
| C  | -3.0472157 | -4.0018631 | -1.5011384 |

|   |            |            |            |
|---|------------|------------|------------|
| C | -2.9949888 | -3.7911539 | -2.8968977 |
| C | -3.9074745 | -4.4460339 | -3.7332797 |
| C | -4.8612768 | -5.3171841 | -3.1811419 |
| H | -5.6644494 | -6.2200352 | -1.3677206 |
| H | -4.0333676 | -5.0132111 | 0.1448887  |
| C | -2.1379004 | -3.2555764 | -0.6287248 |
| H | -2.2585760 | -3.0897937 | -3.3210188 |
| H | -3.8753310 | -4.2717337 | -4.8190110 |
| H | -5.5745004 | -5.8358629 | -3.8404896 |
| O | -2.2479618 | -3.2320015 | 0.6033703  |
| H | -5.5863830 | -1.4397080 | 2.3053594  |
| H | -1.3286999 | -2.6563591 | -1.1270411 |
| H | -3.2724696 | 0.2936501  | 2.3581470  |
| H | -2.5573228 | 0.6246467  | 0.7380403  |

## 7.2.4.7 to 15p-ma

### TS1-8-p; woelfling data

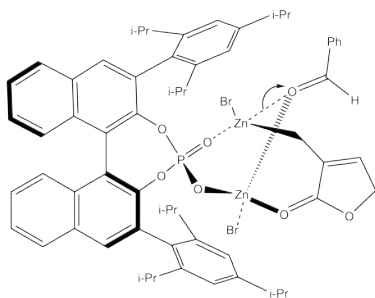

Energy(Hartree)= -11970.009176

|   |           |           |           |
|---|-----------|-----------|-----------|
| C | 0.955773  | 2.436869  | 1.196715  |
| C | 2.357048  | 2.438585  | 1.176999  |
| C | 3.023894  | 3.720161  | 1.140125  |
| C | 4.429657  | 3.854615  | 0.931031  |
| C | 2.241580  | 4.923859  | 1.292934  |
| C | 2.898817  | 6.190438  | 1.288887  |
| C | 0.826585  | 4.831562  | 1.423839  |
| H | 0.244797  | 5.753766  | 1.574246  |
| C | 0.158913  | 3.617007  | 1.333501  |
| C | 3.543815  | -1.108849 | 0.230410  |
| C | 4.588269  | -1.287754 | 1.129859  |
| H | 5.170197  | -2.221153 | 1.095649  |
| C | 4.886514  | -0.330772 | 2.141090  |
| C | 5.897665  | -0.587131 | 3.114922  |
| C | 4.122912  | 0.892549  | 2.219917  |
| C | 4.371728  | 1.769808  | 3.318400  |
| C | 3.118152  | 1.153217  | 1.214593  |
| C | 2.841782  | 0.134989  | 0.295154  |
| O | 0.273445  | 1.224754  | 1.166910  |
| O | 1.849777  | 0.343276  | -0.654666 |
| P | 0.277348  | 0.301744  | -0.203507 |
| O | -0.432475 | 0.999181  | -1.367155 |
| O | -0.178572 | -1.080634 | 0.284676  |
| C | 4.269786  | 6.282919  | 1.106321  |
| C | 5.035835  | 5.103280  | 0.911374  |
| H | 2.288278  | 7.098156  | 1.417911  |
| H | 4.762408  | 7.267162  | 1.095979  |
| H | 5.034440  | 2.951187  | 0.771911  |
| H | 6.120141  | 5.179136  | 0.737941  |
| C | 5.349912  | 1.481050  | 4.259994  |
| C | 6.132553  | 0.301353  | 4.152395  |
| H | 3.767905  | 2.681411  | 3.423865  |
| H | 5.513797  | 2.170413  | 5.102299  |
| H | 6.909425  | 0.085930  | 4.901676  |

|   |           |           |           |
|---|-----------|-----------|-----------|
| H | 6.475353  | -1.521462 | 3.035401  |
| C | -2.125575 | 3.859431  | 0.271953  |
| C | -1.335829 | 3.518808  | 1.402974  |
| C | -3.523156 | 3.717119  | 0.360898  |
| C | -1.959087 | 3.071051  | 2.601426  |
| C | -3.362927 | 2.983588  | 2.647319  |
| C | -4.165923 | 3.279568  | 1.529709  |
| H | -4.141527 | 3.944937  | -0.521255 |
| C | -1.130351 | 2.735634  | 3.841246  |
| H | -3.841151 | 2.634221  | 3.576031  |
| C | -1.520423 | 1.407024  | 4.505603  |
| H | -2.553370 | 1.421823  | 4.910904  |
| H | -0.840653 | 1.181611  | 5.352168  |
| H | -1.454718 | 0.554695  | 3.800853  |
| C | -1.176243 | 3.903947  | 4.843922  |
| H | -0.074656 | 2.632001  | 3.517399  |
| H | -2.211956 | 4.078222  | 5.203687  |
| H | -0.819626 | 4.845010  | 4.378088  |
| H | -0.538598 | 3.693036  | 5.727402  |
| C | -5.685386 | 3.142272  | 1.557182  |
| C | -6.165612 | 1.740916  | 1.971698  |
| H | -7.271846 | 1.675990  | 1.910134  |
| H | -5.877618 | 1.499772  | 3.016256  |
| H | -5.740506 | 0.951854  | 1.323551  |
| C | -6.330642 | 4.226587  | 2.437603  |
| H | -6.030883 | 3.310821  | 0.513008  |
| H | -7.437931 | 4.167107  | 2.387560  |
| H | -6.023024 | 5.241906  | 2.117355  |
| H | -6.034163 | 4.102874  | 3.500229  |
| C | -1.503480 | 4.402084  | -1.013660 |
| C | -2.131968 | 3.818007  | -2.284098 |
| H | -1.546182 | 4.086719  | -3.184713 |
| H | -3.173624 | 4.161299  | -2.447252 |
| H | -2.166286 | 2.715543  | -2.226794 |
| C | -1.582325 | 5.940951  | -1.051220 |
| H | -0.432880 | 4.110385  | -1.013636 |
| H | -1.098918 | 6.337636  | -1.967908 |
| H | -1.088665 | 6.404265  | -0.174846 |
| H | -2.641278 | 6.274788  | -1.052792 |
| H | 1.004536  | -6.009297 | -2.704694 |
| H | 4.987345  | -1.887313 | -4.258703 |
| H | 3.255899  | -4.781157 | 2.964287  |
| C | 1.605829  | -5.332931 | -3.352750 |
| H | 3.334571  | 0.841530  | -4.144837 |
| H | 0.186723  | -5.621078 | -5.002453 |
| H | 0.761041  | -4.086618 | 2.747003  |
| C | 2.133736  | -4.227517 | -2.447625 |
| C | 5.142484  | -1.167500 | -3.427667 |
| C | 0.670807  | -4.793480 | -4.443819 |
| H | 1.212662  | -4.164690 | -5.179911 |
| C | 2.687188  | -3.040111 | -2.956706 |
| C | 3.380254  | -4.655597 | 1.868798  |
| H | 3.399714  | -6.587906 | -3.160021 |
| C | 2.084960  | -4.376920 | -1.055493 |
| C | 2.752529  | -6.164216 | -3.953709 |
| H | 2.358290  | -7.003188 | -4.564552 |
| H | 1.642232  | -5.296702 | -0.641208 |
| C | 2.860940  | -0.079563 | -3.747392 |
| H | 5.645532  | -0.271829 | -3.847211 |
| H | 5.832226  | -1.642419 | -2.700715 |
| C | 3.169291  | -2.018692 | -2.118093 |
| C | 0.935155  | -4.083240 | 1.654616  |
| C | 2.542724  | -3.386099 | -0.168815 |
| H | 4.429133  | -4.355743 | 1.672529  |
| H | 3.224361  | -5.649061 | 1.397644  |
| C | 3.806036  | -0.788080 | -2.760689 |
| C | 3.095657  | -2.188366 | -0.706122 |
| C | 2.364468  | -3.633492 | 1.326686  |
| H | 1.910894  | 0.211785  | -3.258346 |
| H | 0.196569  | -3.391432 | 1.209871  |
| H | 2.615920  | -0.722626 | -4.618433 |



|    |           |           |           |
|----|-----------|-----------|-----------|
| H  | -0.128356 | -4.174826 | -3.996227 |
| H  | 0.717315  | -5.103901 | 1.277374  |
| H  | 3.391359  | -5.536274 | -4.609114 |
| H  | 4.042595  | -0.065311 | -1.953905 |
| H  | 2.530938  | -2.672407 | 1.854186  |
| H  | 2.748557  | -2.898205 | -4.047205 |
| Zn | -1.800725 | 0.515255  | -2.658806 |
| Br | -1.940037 | 0.957332  | -4.926198 |
| C  | -3.492753 | -6.299893 | -3.118796 |
| C  | -2.138128 | -2.281190 | -3.461151 |
| C  | -3.221670 | -5.556754 | -1.951700 |
| C  | -2.877630 | -4.405502 | -4.501824 |
| C  | -2.602671 | -3.658506 | -3.334892 |
| C  | -3.317284 | -5.729279 | -4.391964 |
| C  | -2.770365 | -4.238805 | -2.054970 |
| O  | -1.869872 | -1.576305 | -2.475535 |
| H  | -3.842020 | -7.340233 | -3.032847 |
| H  | -2.725929 | -3.941659 | -5.489573 |
| H  | -3.360187 | -6.015417 | -0.961227 |
| H  | -3.520829 | -6.320911 | -5.296795 |
| H  | -2.531676 | -3.634958 | -1.165567 |
| Br | -1.555456 | -2.674184 | 3.619207  |
| Zn | -1.522925 | -1.240187 | 1.773721  |
| H  | -5.326372 | -3.103941 | -1.190649 |
| H  | -3.632288 | -0.184603 | 2.544611  |
| C  | -4.944409 | -1.865332 | 0.590988  |
| C  | -5.523434 | -2.093831 | -0.765153 |
| H  | -5.204540 | -2.459868 | 1.477014  |
| C  | -4.060962 | -0.816323 | 0.542824  |
| C  | -3.207102 | -0.167008 | 1.524679  |
| C  | -4.040950 | -0.384610 | -0.870921 |
| O  | -4.878739 | -1.128075 | -1.621701 |
| O  | -3.376832 | 0.536366  | -1.366893 |
| H  | -6.621040 | -1.913014 | -0.821279 |
| H  | -2.944913 | 0.860990  | 1.221631  |
| H  | -2.042432 | -1.846646 | -4.490719 |

|   |            |            |            |
|---|------------|------------|------------|
| O | -0.3140329 | 1.2823236  | 1.2866446  |
| O | 1.4628916  | 0.5309589  | -0.4234569 |
| P | -0.1591450 | 0.5521438  | -0.1738320 |
| O | -0.6485818 | 1.4663276  | -1.3142936 |
| O | -0.7493408 | -0.8460668 | -0.0005470 |
| C | 3.6545450  | 6.3059322  | 1.9447675  |
| C | 4.4358458  | 5.1362926  | 1.7504355  |
| H | 1.6544285  | 7.1119780  | 2.1409374  |
| H | 4.1459538  | 7.2869700  | 2.0311144  |
| H | 4.4435148  | 2.9935322  | 1.4894296  |
| H | 5.5309744  | 5.2168705  | 1.6747275  |
| C | 4.3539668  | 1.2935576  | 4.9386096  |
| C | 5.1464776  | 0.1193020  | 4.8415006  |
| H | 2.8737242  | 2.5554203  | 4.0092469  |
| H | 4.4202788  | 1.9245855  | 5.8379474  |
| H | 5.8353624  | -0.1482040 | 5.6570584  |
| H | 5.6185974  | -1.6272805 | 3.6517840  |
| C | -2.7580692 | 3.7649559  | 0.6251228  |
| C | -1.9485725 | 3.4813630  | 1.7577825  |
| C | -4.1332518 | 3.4812350  | 0.6977928  |
| C | -2.5288623 | 2.9529182  | 2.9429872  |
| C | -3.9082279 | 2.6758992  | 2.9565162  |
| C | -4.7257977 | 2.9139272  | 1.8388075  |
| H | -4.7684497 | 3.6719770  | -0.1810349 |
| C | -1.6977835 | 2.7062842  | 4.2018288  |
| H | -4.3489338 | 2.2423914  | 3.8675209  |
| C | -1.8864515 | 1.2959366  | 4.7736227  |
| H | -2.9150852 | 1.1314087  | 5.1573466  |
| H | -1.1901347 | 1.1200627  | 5.6192024  |
| H | -1.6805595 | 0.5197519  | 4.0136619  |
| C | -1.9768324 | 3.7850939  | 5.2644715  |
| H | -0.6286818 | 2.7992992  | 3.9210619  |
| H | -3.0349031 | 3.7482209  | 5.5991924  |
| H | -1.7813065 | 4.8049127  | 4.8752166  |
| H | -1.3355036 | 3.6258740  | 6.1564933  |
| C | -6.1892013 | 2.4864723  | 1.8058015  |
| C | -6.2886262 | 0.9897997  | 1.4486496  |
| H | -7.3458949 | 0.6663828  | 1.3473066  |
| H | -5.8189984 | 0.3699849  | 2.2419074  |
| H | -5.7612104 | 0.7740338  | 0.4988509  |
| C | -6.9594150 | 2.7970282  | 3.0973461  |
| H | -6.6709661 | 3.0557321  | 0.9798987  |
| H | -8.0325187 | 2.5395863  | 2.9828172  |
| H | -6.8883501 | 3.8697369  | 3.3671721  |
| H | -6.5752842 | 2.2063004  | 3.9549309  |
| C | -2.1588314 | 4.3713208  | -0.6427508 |
| C | -2.8383822 | 3.8981519  | -1.9373025 |
| H | -2.2194394 | 4.1508748  | -2.8215162 |
| H | -3.8291639 | 4.3754988  | -2.0899744 |
| H | -3.0134212 | 2.8041062  | -1.9167395 |
| C | -2.1729614 | 5.9112753  | -0.5759628 |
| H | -1.1008067 | 4.0381349  | -0.6884808 |
| H | -1.7156905 | 6.3503342  | -1.4869526 |
| H | -1.6173755 | 6.2934362  | 0.3020819  |
| H | -3.2152241 | 6.2866272  | -0.5011999 |
| H | 1.6837445  | -5.5886944 | -3.5305150 |
| H | 5.5400274  | -1.1525477 | -3.5728760 |
| H | 1.8604355  | -4.5794167 | 2.8994422  |
| C | 2.6704153  | -5.0814286 | -3.6219600 |
| H | 3.6313790  | 1.3806936  | -3.4980540 |
| H | 2.6797172  | -5.4772525 | -5.7698794 |
| H | -0.4156149 | -4.1860708 | 1.8451905  |
| C | 2.6694383  | -3.9474289 | -2.6028313 |
| C | 5.4559915  | -0.5538648 | -2.6417543 |
| C | 2.8218722  | -4.6231367 | -5.0770216 |
| H | 3.8326799  | -4.2087928 | -5.2730505 |
| C | 3.2400941  | -2.6912142 | -2.8553552 |
| C | 2.3499763  | -4.4183018 | 1.9174275  |
| H | 3.6243680  | -6.4973612 | -2.2277124 |
| C | 2.1150544  | -4.1650938 | -1.3282586 |
| C | 3.7545999  | -6.1171303 | -3.2606151 |

### TS2-8-p; woelfling data

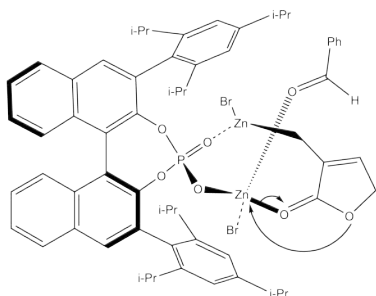

Energy(Hartree) = -11970.007104

|   |            |            |           |
|---|------------|------------|-----------|
| C | 0.3521369  | 2.4848283  | 1.5086076 |
| C | 1.7463065  | 2.4794093  | 1.6142965 |
| C | 2.4118763  | 3.7552059  | 1.7251675 |
| C | 3.8300329  | 3.8917049  | 1.6475595 |
| C | 1.6165725  | 4.9492426  | 1.8870895 |
| C | 2.2727494  | 6.2100413  | 2.0090324 |
| C | 0.1949279  | 4.8505106  | 1.9201655 |
| H | -0.3976369 | 5.7568454  | 2.1170794 |
| C | -0.4599859 | 3.6456960  | 1.7039025 |
| C | 3.0362811  | -0.9915157 | 0.5547628 |
| C | 3.9635539  | -1.2477356 | 1.5578166 |
| H | 4.5672887  | -2.1665164 | 1.5067526 |
| C | 4.1350328  | -0.3729509 | 2.6673893 |
| C | 5.0314426  | -0.6985778 | 3.7285450 |
| C | 3.3676641  | 0.8474988  | 2.7398922 |
| C | 3.4883310  | 1.6498585  | 3.9141519 |
| C | 2.4911443  | 1.1866067  | 1.6443075 |
| C | 2.3222603  | 0.2415319  | 0.6273848 |

|    |            |            |            |
|----|------------|------------|------------|
| H  | 3.7277040  | -6.9838750 | -3.9535829 |
| H  | 1.6260995  | -5.1315966 | -1.1259807 |
| C  | 3.1775021  | 0.3902949  | -3.2885441 |
| H  | 5.9395903  | 0.4262949  | -2.8324682 |
| H  | 6.0362123  | -1.0764717 | -1.8545295 |
| C  | 3.3291881  | -1.6950475 | -1.8618185 |
| C  | 0.0851730  | -4.1107468 | 0.8609428  |
| C  | 2.1584084  | -3.2003381 | -0.3069789 |
| H  | 3.3522721  | -3.9866649 | 2.1045904  |
| H  | 2.4958133  | -5.4089005 | 1.4367016  |
| C  | 3.9880819  | -0.3646169 | -2.2180654 |
| C  | 2.8214992  | -1.9656684 | -0.5639148 |
| C  | 1.4863096  | -3.5013270 | 1.0321907  |
| H  | 2.1355734  | 0.5577958  | -2.9521392 |
| H  | -0.5452768 | -3.4712610 | 0.2083039  |
| H  | 3.1476371  | -0.1708640 | -4.2464868 |
| H  | 2.0790514  | -3.8443209 | -5.3406815 |
| H  | 0.1165080  | -5.1266296 | 0.4148119  |
| H  | 4.7640617  | -5.6595984 | -3.3220141 |
| H  | 3.9946279  | 0.2657839  | -1.3061816 |
| H  | 1.3508856  | -2.5399163 | 1.5706076  |
| H  | 3.6548180  | -2.4751203 | -3.8511279 |
| Zn | -1.4904836 | 1.0378977  | -2.9748732 |
| Br | -1.5857176 | 1.8133745  | -5.1311206 |
| C  | -1.1031257 | -5.8727514 | -3.9200999 |
| C  | -0.6746058 | -1.6428125 | -4.0598159 |
| C  | -1.0922117 | -5.1314986 | -2.7222382 |
| C  | -0.7455088 | -3.8480389 | -5.2090315 |
| C  | -0.7457838 | -3.0989201 | -4.0089509 |
| C  | -0.9276987 | -5.2345235 | -5.1624746 |
| C  | -0.9118887 | -3.7468849 | -2.7603092 |
| O  | -0.8093868 | -0.9412107 | -3.0436421 |
| H  | -1.2471536 | -6.9637490 | -3.8849609 |
| H  | -0.6160668 | -3.3308031 | -6.1731003 |
| H  | -1.2172027 | -5.6401134 | -1.7545855 |
| H  | -0.9325977 | -5.8234074 | -6.0914953 |
| H  | -0.8941887 | -3.1359701 | -1.8463985 |
| Br | -1.2120427 | -2.0534574 | 3.4621670  |
| Zn | -2.0621054 | -1.6145365 | 1.3316246  |
| H  | -3.1939081 | -2.0579664 | -3.9899199 |
| H  | -4.2404508 | -2.9462122 | 0.7906438  |
| C  | -4.0880639 | -2.4965853 | -2.0234084 |
| C  | -3.9687179 | -1.6931605 | -3.2808951 |
| H  | -4.3284978 | -3.5682440 | -2.0190024 |
| C  | -3.9027839 | -1.6983975 | -0.9292417 |
| C  | -3.8786159 | -1.9384645 | 0.5132289  |
| C  | -3.6067350 | -0.3439159 | -1.4540286 |
| O  | -3.6074300 | -0.3696879 | -2.8417542 |
| O  | -3.3408701 | 0.6918728  | -0.8751968 |
| H  | -4.9238576 | -1.6200225 | -3.8490589 |
| H  | -4.4817527 | -1.1720907 | 1.0441447  |
| H  | -0.5550628 | -1.1518297 | -5.0610506 |

|   |           |           |           |
|---|-----------|-----------|-----------|
| C | 1.657986  | 4.842733  | 1.325363  |
| C | 2.311802  | 6.110443  | 1.291045  |
| C | 0.247968  | 4.735114  | 1.508464  |
| H | -0.336127 | 5.649864  | 1.694430  |
| C | -0.409464 | 3.510765  | 1.467148  |
| C | 3.088265  | -1.108126 | 0.230289  |
| C | 4.057425  | -1.309983 | 1.207739  |
| H | 4.677699  | -2.217885 | 1.155348  |
| C | 4.261123  | -0.398018 | 2.276838  |
| C | 5.208456  | -0.668346 | 3.308121  |
| C | 3.484088  | 0.815009  | 2.325979  |
| C | 3.658222  | 1.680661  | 3.447580  |
| C | 2.544415  | 1.082478  | 1.266044  |
| C | 2.325194  | 0.095128  | 0.299202  |
| O | -0.258849 | 1.116407  | 1.169502  |
| O | 1.372951  | 0.320707  | -0.688718 |
| P | -0.229142 | 0.391425  | -0.300735 |
| O | -0.787764 | 1.373528  | -1.356325 |
| O | -0.825982 | -1.001645 | -0.168270 |
| C | 3.682525  | 6.202582  | 1.100018  |
| C | 4.454987  | 5.023456  | 0.926938  |
| H | 1.702256  | 7.019807  | 1.412339  |
| H | 4.172403  | 7.187796  | 1.071419  |
| H | 4.456166  | 2.865700  | 0.830768  |
| H | 5.539107  | 5.100192  | 0.752455  |
| C | 4.575731  | 1.380920  | 4.444619  |
| C | 5.369047  | 0.204887  | 4.371695  |
| H | 3.043549  | 2.588024  | 3.525635  |
| H | 4.683089  | 2.058334  | 5.305310  |
| H | 6.096737  | -0.018214 | 5.166549  |
| H | 5.798409  | -1.596433 | 3.247033  |
| C | -2.845459 | 3.660604  | 0.748872  |
| C | -1.875614 | 3.376415  | 1.742704  |
| C | -4.208312 | 3.530004  | 1.071847  |
| C | -2.283179 | 2.946183  | 3.035621  |
| C | -3.656253 | 2.820782  | 3.303072  |
| C | -4.636991 | 3.103644  | 2.337438  |
| H | -4.971187 | 3.738206  | 0.304393  |
| C | -1.272138 | 2.654772  | 4.142943  |
| H | -3.967805 | 2.475623  | 4.300998  |
| C | -1.544660 | 1.326466  | 4.862722  |
| H | -2.482256 | 1.356707  | 5.456328  |
| H | -0.719120 | 1.093170  | 5.565752  |
| H | -1.611031 | 0.486245  | 4.144939  |
| C | -1.195225 | 3.833759  | 5.131269  |
| H | -0.272470 | 2.562507  | 3.672170  |
| H | -2.168262 | 3.983776  | 5.644854  |
| H | -0.936654 | 4.781732  | 4.616564  |
| H | -0.427117 | 3.643299  | 5.909686  |
| C | -6.116105 | 2.885386  | 2.628167  |
| C | -6.435972 | 1.379040  | 2.686361  |
| H | -7.517092 | 1.205727  | 2.869473  |
| H | -5.868052 | 0.884704  | 3.501923  |
| H | -6.156422 | 0.877994  | 1.738442  |
| C | -6.584340 | 3.611289  | 3.900183  |
| H | -6.680960 | 3.313944  | 1.770412  |
| H | -7.677315 | 3.487520  | 4.046137  |
| H | -6.363559 | 4.696598  | 3.849565  |
| H | -6.084394 | 3.209463  | 4.805854  |
| C | -2.437162 | 4.084470  | -0.658427 |
| C | -3.254402 | 3.365869  | -1.744005 |
| H | -2.824776 | 3.554054  | -2.752140 |
| H | -4.306366 | 3.713376  | -1.807495 |
| H | -3.354440 | 2.275597  | -1.509469 |
| C | -2.524077 | 5.608847  | -0.853298 |
| H | -1.379180 | 3.781637  | -0.796113 |
| H | -2.208634 | 5.899624  | -1.877160 |
| H | -1.872870 | 6.140822  | -0.132578 |
| H | -3.562155 | 5.969965  | -0.697483 |
| H | 2.413272  | -6.067698 | -3.516845 |
| H | 5.535005  | -1.136127 | -4.000142 |

### TS3-8-p; woelfling data

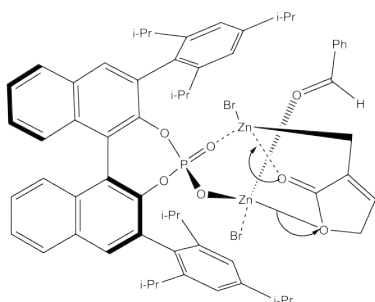

Energy(Hartree) = -11969.991084

|   |          |          |          |
|---|----------|----------|----------|
| C | 0.392105 | 2.345135 | 1.264616 |
| C | 1.787137 | 2.364277 | 1.225993 |
| C | 2.448028 | 3.643681 | 1.182755 |
| C | 3.853078 | 3.773880 | 0.972022 |

|    |           |           |           |
|----|-----------|-----------|-----------|
| H  | 1.900796  | -4.693948 | 2.716244  |
| C  | 3.331804  | -5.454813 | -3.670682 |
| H  | 3.388782  | 1.135412  | -3.889145 |
| H  | 3.323278  | -5.947445 | -5.800436 |
| H  | -0.259371 | -4.347316 | 1.448756  |
| C  | 3.220983  | -4.276382 | -2.706332 |
| C  | 5.432988  | -0.551092 | -3.062337 |
| C  | 3.361877  | -5.050144 | -5.149996 |
| H  | 4.292779  | -4.503234 | -5.406939 |
| C  | 3.576474  | -2.965300 | -3.056499 |
| C  | 2.474061  | -4.594747 | 1.772387  |
| H  | 4.464673  | -6.701198 | -2.257341 |
| C  | 2.685846  | -4.486921 | -1.419242 |
| C  | 4.528199  | -6.354167 | -3.307971 |
| H  | 4.566923  | -7.248526 | -3.964078 |
| H  | 2.354288  | -5.502373 | -1.141992 |
| C  | 3.036555  | 0.120025  | -3.612370 |
| H  | 5.803264  | 0.473463  | -3.271230 |
| H  | 6.100904  | -1.011260 | -2.306270 |
| C  | 3.487435  | -1.895217 | -2.141728 |
| C  | 0.310467  | -4.267758 | 0.500908  |
| C  | 2.486559  | -3.439075 | -0.504417 |
| H  | 3.468758  | -4.174195 | 2.020788  |
| H  | 2.630620  | -5.612476 | 1.355648  |
| C  | 3.975878  | -0.512713 | -2.568202 |
| C  | 2.963387  | -2.140852 | -0.846388 |
| C  | 1.712027  | -3.695680 | 0.787333  |
| H  | 2.007616  | 0.215498  | -3.213841 |
| H  | -0.260676 | -3.606843 | -0.181318 |
| H  | 2.995608  | -0.486527 | -4.541493 |
| H  | 2.503980  | -4.398263 | -5.413506 |
| H  | 0.349219  | -5.277332 | 0.039718  |
| H  | 5.482803  | -5.800430 | -3.421490 |
| H  | 3.956778  | 0.140467  | -1.672229 |
| H  | 1.549086  | -2.718200 | 1.286158  |
| H  | 3.959161  | -2.759348 | -4.066740 |
| Zn | -1.931900 | 1.340616  | -2.862096 |
| Br | -2.058548 | 1.915309  | -5.082579 |
| C  | -0.499432 | -5.140699 | -4.073772 |
| C  | -2.656869 | -1.512905 | -3.655053 |
| C  | -0.091781 | -4.188489 | -3.122394 |
| C  | -2.358862 | -3.732274 | -4.721784 |
| C  | -1.943122 | -2.768787 | -3.770388 |
| C  | -1.637112 | -4.920328 | -4.870708 |
| C  | -0.805034 | -3.002583 | -2.960931 |
| O  | -2.361175 | -0.645611 | -2.815122 |
| H  | 0.085458  | -6.066133 | -4.193249 |
| H  | -3.248174 | -3.535229 | -5.340597 |
| H  | 0.797662  | -4.361717 | -2.507010 |
| H  | -1.950174 | -5.675311 | -5.606335 |
| H  | -0.503219 | -2.249398 | -2.215862 |
| Br | -0.601290 | -1.968005 | 3.252786  |
| Zn | -1.933666 | -1.881614 | 1.324490  |
| H  | -5.077240 | -0.436369 | -2.932105 |
| H  | -3.677223 | -3.772693 | 0.438547  |
| C  | -5.084257 | -1.967296 | -1.334443 |
| C  | -5.430549 | -0.618145 | -1.891672 |
| H  | -5.443826 | -2.910530 | -1.769447 |
| C  | -4.325905 | -1.816512 | -0.212895 |
| C  | -3.689061 | -2.714581 | 0.761338  |
| C  | -4.099153 | -0.352028 | -0.055294 |
| O  | -4.771709 | 0.332463  | -1.037462 |
| O  | -3.389308 | 0.209578  | 0.763943  |
| H  | -6.525382 | -0.413899 | -1.882039 |
| H  | -4.235168 | -2.657944 | 1.731130  |
| H  | -3.493242 | -1.331944 | -4.379845 |

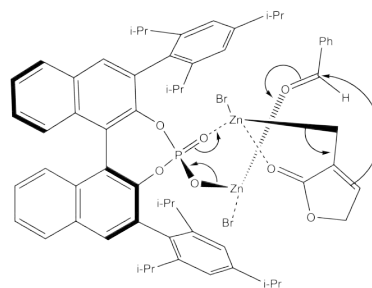

Energy(Hartree) = -11970.0070755199

|   |            |            |            |
|---|------------|------------|------------|
| C | 0.4873961  | 2.1200739  | 1.5076805  |
| C | 1.8756084  | 2.1381780  | 1.6755873  |
| C | 2.5298670  | 3.4186453  | 1.7851035  |
| C | 3.9503738  | 3.5617884  | 1.7960295  |
| C | 1.7209354  | 4.6118536  | 1.8528846  |
| C | 2.3604764  | 5.8815446  | 1.9818679  |
| C | 0.3028395  | 4.5034123  | 1.7776354  |
| H | -0.3058425 | 5.4152328  | 1.8773212  |
| C | -0.3352227 | 3.2843711  | 1.5758891  |
| C | 3.2939296  | -1.2568532 | 0.5770142  |
| C | 4.1780351  | -1.5256309 | 1.6165694  |
| H | 4.8164834  | -2.4198990 | 1.5578980  |
| C | 4.2735583  | -0.6902850 | 2.7657301  |
| C | 5.1285790  | -1.0303823 | 3.8570446  |
| C | 3.4799057  | 0.5125114  | 2.8408488  |
| C | 3.5395327  | 1.2907561  | 4.0358445  |
| C | 2.6382637  | 0.8592197  | 1.7226916  |
| C | 2.5323020  | -0.0537256 | 0.6705436  |
| O | -0.1512291 | 0.8915043  | 1.3246926  |
| O | 1.6671954  | 0.2483967  | -0.3856357 |
| P | 0.0637678  | 0.1011800  | -0.0937026 |
| O | -0.6464717 | 0.8344530  | -1.2341294 |
| O | -0.3089935 | -1.3657052 | 0.1465566  |
| C | 3.7432157  | 5.9834395  | 2.0121552  |
| C | 4.5416426  | 4.8129767  | 1.9047637  |
| H | 1.7307063  | 6.7829851  | 2.0439506  |
| H | 4.2241539  | 6.9690802  | 2.1052836  |
| H | 4.5800897  | 2.6657525  | 1.7049706  |
| H | 5.6390465  | 4.8985010  | 1.9024355  |
| C | 4.3684385  | 0.9228139  | 5.0868415  |
| C | 5.1811775  | -0.2389396 | 4.9945793  |
| H | 2.9088065  | 2.1863043  | 4.1247205  |
| H | 4.3909134  | 1.5339816  | 6.0020194  |
| H | 5.8390958  | -0.5161838 | 5.8322644  |
| H | 5.7363613  | -1.9458563 | 3.7827453  |
| C | -2.5181879 | 3.4781366  | 0.2989743  |
| C | -1.8292923 | 3.1884013  | 1.5078865  |
| C | -3.9242068 | 3.4424339  | 0.3007258  |
| C | -2.5535118 | 2.8319206  | 2.6763889  |
| C | -3.9588059 | 2.7999857  | 2.6195103  |
| C | -4.6659946 | 3.1090023  | 1.4467095  |
| H | -4.4715657 | 3.6644120  | -0.6292242 |
| C | -1.8500778 | 2.4583048  | 3.9796922  |
| H | -4.5158655 | 2.5169344  | 3.5262844  |
| C | -1.9816848 | 0.9511647  | 4.2675099  |
| H | -3.0448629 | 0.6553085  | 4.3866095  |
| H | -1.4475068 | 0.6802732  | 5.2017372  |
| H | -1.5597215 | 0.3431955  | 3.4456452  |
| C | -2.3362522 | 3.3092399  | 5.1660952  |
| H | -0.7693148 | 2.6752898  | 3.8521067  |
| H | -3.4045668 | 3.1182645  | 5.3995226  |
| H | -2.2252049 | 4.3934647  | 4.9595111  |
| H | -1.7526877 | 3.0713294  | 6.0793487  |
| C | -6.1895397 | 3.1155325  | 1.4081921  |
| C | -6.8161135 | 1.8652799  | 2.0464685  |
| H | -7.9180585 | 1.8704449  | 1.9162537  |

TS4-8-p; COSMO

|    |            |            |            |    |            |            |            |
|----|------------|------------|------------|----|------------|------------|------------|
| H  | -6.6167059 | 1.8187236  | 3.1372457  | Zn | -1.7680075 | -2.1572973 | 1.1944870  |
| H  | -6.4132829 | 0.9399369  | 1.5898961  | H  | -5.3388670 | 0.4069440  | -2.2459888 |
| C  | -6.7418988 | 4.4031051  | 2.0500067  | H  | -3.3923571 | -4.0236693 | -0.5326179 |
| H  | -6.4801797 | 3.1245370  | 0.3339581  | C  | -4.8387053 | -1.6760542 | -1.6376032 |
| H  | -7.8490817 | 4.4432035  | 1.9789627  | C  | -5.4592127 | -0.3118646 | -1.4110285 |
| H  | -6.3307539 | 5.3073638  | 1.5574178  | H  | -5.3995596 | -2.4651137 | -2.1579650 |
| H  | -6.4682531 | 4.4536199  | 3.1250190  | C  | -4.0877805 | -1.9650280 | -0.4785430 |
| C  | -1.7647351 | 3.8156809  | -0.9870900 | C  | -3.4311264 | -3.0929503 | 0.0520606  |
| C  | -2.4183727 | 3.1934618  | -2.2344478 | C  | -3.9474601 | -0.6710178 | 0.2510009  |
| H  | -1.7060881 | 3.1931719  | -3.0891519 | O  | -4.7356332 | 0.2603432  | -0.2882708 |
| H  | -3.3077536 | 3.7601504  | -2.5803407 | O  | -3.1701497 | -0.4512901 | 1.1861643  |
| H  | -2.7836096 | 2.1671694  | -2.0187500 | H  | -6.5334509 | -0.3755707 | -1.1339986 |
| C  | -1.5984396 | 5.3349656  | -1.1751393 | H  | -3.6097501 | -3.2653577 | 1.1370807  |
| H  | -0.7528977 | 3.3710472  | -0.8957657 | H  | -4.4917184 | -1.2917963 | -3.9353933 |
| H  | -1.0468640 | 5.5587591  | -2.1119149 |    |            |            |            |
| H  | -1.0385890 | 5.7899232  | -0.3350779 |    |            |            |            |
| H  | -2.5884016 | 5.8345033  | -1.2317719 |    |            |            |            |
| H  | 2.5507318  | -5.7677156 | -3.7249165 |    |            |            |            |
| H  | 6.0180857  | -1.0010373 | -3.3348699 |    |            |            |            |
| H  | 2.3890420  | -5.1766428 | 2.5635876  |    |            |            |            |
| C  | 3.1618289  | -4.8869600 | -4.0250033 |    |            |            |            |
| H  | 4.0156848  | 1.4755569  | -3.2228072 |    |            |            |            |
| H  | 2.4551198  | -5.0270332 | -6.0950980 |    |            |            |            |
| H  | 0.0872569  | -4.8138012 | 1.5334779  |    |            |            |            |
| C  | 3.1573178  | -3.9264268 | -2.8420037 |    |            |            |            |
| C  | 5.8395616  | -0.4667828 | -2.3782301 |    |            |            |            |
| C  | 2.5157662  | -4.2758247 | -5.2807403 |    |            |            |            |
| H  | 3.1069111  | -3.4191581 | -5.6657919 |    |            |            |            |
| C  | 3.6796957  | -2.6268736 | -2.9532018 |    |            |            |            |
| C  | 2.8752569  | -4.8682345 | 1.6151725  |    |            |            |            |
| H  | 5.0373054  | -5.8719582 | -3.4273942 |    |            |            |            |
| C  | 2.6322928  | -4.3160230 | -1.5980017 |    |            |            |            |
| C  | 4.5872720  | -5.3913262 | -4.3194048 |    |            |            |            |
| H  | 4.5848111  | -6.1307295 | -5.1471476 |    |            |            |            |
| H  | 2.2027421  | -5.3266183 | -1.5037009 |    |            |            |            |
| C  | 3.5870341  | 0.4555255  | -3.1379285 |    |            |            |            |
| H  | 6.2954630  | 0.5410709  | -2.4673304 |    |            |            |            |
| H  | 6.3768415  | -1.0181574 | -1.5797373 |    |            |            |            |
| C  | 3.7120123  | -1.7370249 | -1.8648103 |    |            |            |            |
| C  | 0.5949144  | -4.6201113 | 0.5678770  |    |            |            |            |
| C  | 2.6098943  | -3.4560722 | -0.4817679 |    |            |            |            |
| H  | 3.8377530  | -4.3825132 | 1.8690279  |    |            |            |            |
| H  | 3.1067307  | -5.7864073 | 1.0349326  |    |            |            |            |
| C  | 4.3353122  | -0.3568811 | -2.0664771 |    |            |            |            |
| C  | 3.1878649  | -2.1615859 | -0.6113147 |    |            |            |            |
| C  | 1.9502123  | -3.9330173 | 0.8134247  |    |            |            |            |
| H  | 2.5121688  | 0.5556048  | -2.8920382 |    |            |            |            |
| H  | -0.0743512 | -3.9843721 | -0.0465643 |    |            |            |            |
| H  | 3.6579397  | -0.0193463 | -4.1385665 |    |            |            |            |
| H  | 1.4913191  | -3.9069371 | -5.0727747 |    |            |            |            |
| H  | 0.7057550  | -5.5918591 | 0.0430222  |    |            |            |            |
| H  | 5.2490037  | -4.5512831 | -4.6183683 |    |            |            |            |
| H  | 4.2486015  | 0.2005904  | -1.1123094 |    |            |            |            |
| H  | 1.7473491  | -3.0361970 | 1.4350888  |    |            |            |            |
| H  | 4.0852896  | -2.2913618 | -3.9207612 |    |            |            |            |
| Zn | -1.2948317 | 0.6515865  | -3.0475783 |    |            |            |            |
| Br | -0.0298028 | 1.0494547  | -4.9222905 |    |            |            |            |
| C  | -0.9980658 | -4.6481421 | -3.6287988 |    |            |            |            |
| C  | -3.5754369 | -1.2277532 | -3.3041898 |    |            |            |            |
| C  | -0.6027208 | -3.5484867 | -2.8494134 |    |            |            |            |
| C  | -3.1040046 | -3.5405777 | -4.1356172 |    |            |            |            |
| C  | -2.7053827 | -2.4225014 | -3.3685934 |    |            |            |            |
| C  | -2.2543666 | -4.6470682 | -4.2636358 |    |            |            |            |
| C  | -1.4603900 | -2.4516204 | -2.7064943 |    |            |            |            |
| O  | -3.1183177 | -0.0367853 | -3.1057896 |    |            |            |            |
| H  | -0.3250626 | -5.5125083 | -3.7387965 |    |            |            |            |
| H  | -4.0775570 | -3.5262804 | -4.6521270 |    |            |            |            |
| H  | 0.3735955  | -3.5439891 | -2.3445756 |    |            |            |            |
| H  | -2.5651530 | -5.5090307 | -4.8734234 |    |            |            |            |
| H  | -1.1672411 | -1.6343324 | -2.0320436 |    |            |            |            |
| Br | -1.3197445 | -2.9178369 | 3.3571025  |    |            |            |            |

### TS4-8-p

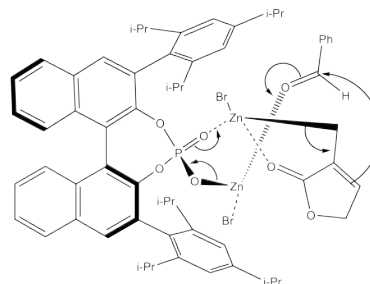

Energy(Hartree) = -11969.99432808  
number of imaginary frequencies: 2

|   |            |            |            |
|---|------------|------------|------------|
| C | 0.4840299  | 2.1155646  | 1.5065452  |
| C | 1.8715118  | 2.1346771  | 1.6815327  |
| C | 2.5232553  | 3.4154342  | 1.8023615  |
| C | 3.9432414  | 3.5605264  | 1.8217643  |
| C | 1.7127697  | 4.6070304  | 1.8744087  |
| C | 2.3502511  | 5.8758491  | 2.0161426  |
| C | 0.2957348  | 4.4966542  | 1.7906429  |
| H | -0.3165012 | 5.4057802  | 1.8934540  |
| C | -0.3400106 | 3.2785894  | 1.5772425  |
| C | 3.2994105  | -1.2524008 | 0.5710734  |
| C | 4.1832714  | -1.5219711 | 1.6103518  |
| H | 4.8227621  | -2.4151771 | 1.5479457  |
| C | 4.2749658  | -0.6919885 | 2.7632492  |
| C | 5.1285866  | -1.0340138 | 3.8543859  |
| C | 3.4768996  | 0.5073037  | 2.8429658  |
| C | 3.5312822  | 1.2792261  | 4.0419434  |
| C | 2.6367976  | 0.8571996  | 1.7246540  |
| C | 2.5355292  | -0.0509943 | 0.6679693  |
| O | -0.1533724 | 0.8880779  | 1.3145362  |
| O | 1.6731504  | 0.2539079  | -0.3892252 |
| P | 0.0699400  | 0.0998416  | -0.1033435 |
| O | -0.6394022 | 0.8291629  | -1.2470289 |
| O | -0.2985619 | -1.3688308 | 0.1344272  |
| C | 3.7320663  | 5.9794512  | 2.0549868  |
| C | 4.5320410  | 4.8111796  | 1.9433104  |
| H | 1.7188904  | 6.7759711  | 2.0810011  |
| H | 4.2110153  | 6.9650047  | 2.1580792  |
| H | 4.5735871  | 2.6654058  | 1.7277629  |
| H | 5.6292962  | 4.8978174  | 1.9477545  |
| C | 4.3595048  | 0.9091311  | 5.0920797  |
| C | 5.1763498  | -0.2486277 | 4.9956069  |
| H | 2.8965801  | 2.1715601  | 4.1332407  |
| H | 4.3775102  | 1.5154836  | 6.0104797  |
| H | 5.8331994  | -0.5282819 | 5.8332506  |
| H | 5.7387930  | -1.9475820 | 3.7769658  |
| C | -2.5142092 | 3.4828803  | 0.2885591  |
| C | -1.8336593 | 3.1849742  | 1.4999938  |

|   |            |            |            |    |            |            |            |
|---|------------|------------|------------|----|------------|------------|------------|
| C | -3.9201395 | 3.4571820  | 0.2838401  | H  | 4.2390028  | 0.2115151  | -1.1239397 |
| C | -2.5652402 | 2.8279239  | 2.6634848  | H  | 1.7751832  | -3.0450931 | 1.4426967  |
| C | -3.9701173 | 2.8045299  | 2.5989516  | H  | 4.0574496  | -2.2742711 | -3.9351372 |
| C | -4.6693851 | 3.1243843  | 1.4247321  | Zn | -1.2593485 | 0.6454163  | -3.0686853 |
| H | -4.4614878 | 3.6883542  | -0.6474862 | Br | -0.0336313 | 1.0466754  | -4.9558184 |
| C | -1.8704647 | 2.4480046  | 3.9695880  | C  | -1.0239212 | -4.6983168 | -3.5985973 |
| H | -4.5329846 | 2.5211458  | 3.5019490  | C  | -3.5489457 | -1.2402348 | -3.3034944 |
| C | -2.0087092 | 0.9412180  | 4.2553977  | C  | -0.6115387 | -3.5978232 | -2.8297969 |
| H | -3.0729004 | 0.6468014  | 4.3675001  | C  | -3.1128939 | -3.5655501 | -4.1132154 |
| H | -1.4811786 | 0.6668077  | 5.1920330  | C  | -2.6972225 | -2.4461674 | -3.3570947 |
| H | -1.5831008 | 0.3317671  | 3.4368608  | C  | -2.2804609 | -4.6852067 | -4.2321818 |
| C | -2.3593471 | 3.2998999  | 5.1541193  | C  | -1.4518831 | -2.4867158 | -2.6961302 |
| H | -0.7882970 | 2.6615336  | 3.8478971  | O  | -3.0882631 | -0.0560817 | -3.1064913 |
| H | -3.4292885 | 3.1128216  | 5.3827800  | H  | -0.3621398 | -5.5720804 | -3.7018868 |
| H | -2.2441754 | 4.3838974  | 4.9494480  | H  | -4.0863227 | -3.5408281 | -4.6299804 |
| H | -1.7819275 | 3.0588535  | 6.0703081  | H  | 0.3658883  | -3.6022628 | -2.3271543 |
| C | -6.1926771 | 3.1444550  | 1.3800921  | H  | -2.6042141 | -5.5476939 | -4.8344115 |
| C | -6.8329905 | 1.8938115  | 2.0037320  | H  | -1.1445726 | -1.6656466 | -2.0330789 |
| H | -7.9344132 | 1.9086566  | 1.8699464  | Br | -1.2829232 | -2.9410628 | 3.3686785  |
| H | -6.6385802 | 1.8347723  | 3.0946335  | Zn | -1.7241723 | -2.1607880 | 1.2260696  |
| H | -6.4349083 | 0.9689850  | 1.5420787  | H  | -5.2846044 | 0.4054628  | -2.2273508 |
| C | -6.7367618 | 4.4307851  | 2.0308719  | H  | -3.3905872 | -4.0319490 | -0.4882849 |
| H | -6.4789721 | 3.1658508  | 0.3045845  | C  | -4.8271646 | -1.6796588 | -1.5976173 |
| H | -7.8432087 | 4.4822095  | 1.9561700  | C  | -5.4242778 | -0.3036347 | -1.3858290 |
| H | -6.3145995 | 5.3353077  | 1.5487892  | H  | -5.3919130 | -2.4655039 | -2.1182554 |
| H | -6.4665265 | 4.4697801  | 3.1069993  | C  | -4.0703637 | -1.9677297 | -0.4437002 |
| C | -1.7521955 | 3.8198327  | -0.9928047 | C  | -3.4184359 | -3.0992795 | 0.0889387  |
| C | -2.4025233 | 3.2055652  | -2.2459046 | C  | -3.9126592 | -0.6693060 | 0.2752370  |
| H | -1.6869159 | 3.2044922  | -3.0976635 | O  | -4.6978009 | 0.2666395  | -0.2672404 |
| H | -3.2880848 | 3.7780333  | -2.5925365 | O  | -3.1294844 | -0.4474048 | 1.2023108  |
| H | -2.7703888 | 2.1789080  | -2.0374059 | H  | -6.5022290 | -0.3414104 | -1.1150540 |
| C | -1.5753257 | 5.3385010  | -1.1749688 | H  | -3.5696993 | -3.2561590 | 1.1793602  |
| H | -0.7435732 | 3.3685438  | -0.8979949 | H  | -4.4774387 | -1.3034092 | -3.9190048 |
| H | -1.0184718 | 5.5627341  | -2.1084397 |    |            |            |            |
| H | -1.0155109 | 5.7866121  | -0.3314637 |    |            |            |            |
| H | -2.5615145 | 5.8451310  | -1.2328455 |    |            |            |            |
| H | 2.5486806  | -5.7617306 | -3.7294333 |    |            |            |            |
| H | 5.9980592  | -0.9856082 | -3.3571056 |    |            |            |            |
| H | 2.4340104  | -5.1846416 | 2.5572788  |    |            |            |            |
| C | 3.1479976  | -4.8746717 | -4.0358621 |    |            |            |            |
| H | 3.9921509  | 1.4887714  | -3.2319439 |    |            |            |            |
| H | 2.4157251  | -5.0159962 | -6.0978693 |    |            |            |            |
| H | 0.1226669  | -4.8261956 | 1.5497512  |    |            |            |            |
| C | 3.1500413  | -3.9168353 | -2.8506527 |    |            |            |            |
| C | 5.8234355  | -0.4524619 | -2.3992321 |    |            |            |            |
| C | 2.4793163  | -4.2672287 | -5.2814696 |    |            |            |            |
| H | 3.0562357  | -3.4036250 | -5.6721380 |    |            |            |            |
| C | 3.6634968  | -2.6143232 | -2.9644125 |    |            |            |            |
| C | 2.9112573  | -4.8726973 | 1.6057508  |    |            |            |            |
| H | 5.0394866  | -5.8434442 | -3.4640504 |    |            |            |            |
| C | 2.6405789  | -4.3117742 | -1.6022930 |    |            |            |            |
| C | 4.5735789  | -5.3662947 | -4.3494800 |    |            |            |            |
| H | 4.5681863  | -6.1040263 | -5.1786605 |    |            |            |            |
| H | 2.2202826  | -5.3259942 | -1.5043631 |    |            |            |            |
| C | 3.5657036  | 0.4681756  | -3.1454446 |    |            |            |            |
| H | 6.2779415  | 0.5557540  | -2.4904404 |    |            |            |            |
| H | 6.3659862  | -1.0042456 | -1.6048205 |    |            |            |            |
| C | 3.7025041  | -1.7265980 | -1.8748491 |    |            |            |            |
| C | 0.6217051  | -4.6296951 | 0.5803590  |    |            |            |            |
| C | 2.6225658  | -3.4541228 | -0.4844993 |    |            |            |            |
| H | 3.8744163  | -4.3851451 | 1.8529847  |    |            |            |            |
| H | 3.1415668  | -5.7882691 | 1.0210648  |    |            |            |            |
| C | 4.3207821  | -0.3446063 | -2.0793061 |    |            |            |            |
| C | 3.1916086  | -2.1560318 | -0.6176275 |    |            |            |            |
| C | 1.9764903  | -3.9380076 | 0.8150589  |    |            |            |            |
| H | 2.4924545  | 0.5690771  | -2.8940745 |    |            |            |            |
| H | -0.0553610 | -3.9951942 | -0.0267948 |    |            |            |            |
| H | 3.6303894  | -0.0037377 | -4.1477856 |    |            |            |            |
| H | 1.4542917  | -3.9080596 | -5.0602821 |    |            |            |            |
| H | 0.7309441  | -5.6001113 | 0.0523805  |    |            |            |            |
| H | 5.2243287  | -4.5201350 | -4.6545719 |    |            |            |            |

### int1-8-p; COSMO

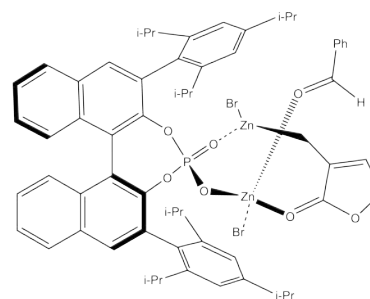

Energy(Hartree)= -11970.05102137

|   |            |            |            |
|---|------------|------------|------------|
| C | 0.6115957  | 2.3592910  | 1.8284935  |
| C | 1.9844352  | 2.2223272  | 2.0507381  |
| C | 2.7566137  | 3.4255723  | 2.2531319  |
| C | 4.1816289  | 3.4261346  | 2.3431142  |
| C | 2.0685856  | 4.6934128  | 2.3356472  |
| C | 2.8227534  | 5.8820151  | 2.5730259  |
| C | 0.6601465  | 4.7492887  | 2.1235848  |
| H | 0.1566382  | 5.7273939  | 2.1583481  |
| C | -0.0764057 | 3.6126417  | 1.8175076  |
| C | 3.0379815  | -1.2204723 | 0.7166912  |
| C | 3.9042935  | -1.6453259 | 1.7178515  |
| H | 4.4401924  | -2.5986984 | 1.5951832  |
| C | 4.0885176  | -0.9059015 | 2.9199885  |
| C | 4.9009613  | -1.4109863 | 3.9789550  |
| C | 3.4161151  | 0.3588875  | 3.0894677  |
| C | 3.5404773  | 1.0287321  | 4.3429366  |
| C | 2.6097062  | 0.8700999  | 2.0100439  |
| C | 2.4007244  | 0.0439525  | 0.8997215  |
| O | -0.1565244 | 1.2178176  | 1.6292928  |
| O | 1.5506313  | 0.4785502  | -0.1188908 |
| P | -0.0592677 | 0.4069359  | 0.1970245  |

|   |            |            |            |    |            |            |            |
|---|------------|------------|------------|----|------------|------------|------------|
| O | -0.7095947 | 1.1957974  | -0.9486478 | H  | 5.9743406  | 0.4753661  | -2.4902871 |
| O | -0.5498537 | -1.0085930 | 0.5080472  | H  | 5.9902309  | -1.1338062 | -1.6937032 |
| C | 4.2041813  | 5.8411373  | 2.6895441  | C  | 3.2544964  | -1.6064750 | -1.7768189 |
| C | 4.8871693  | 4.6027668  | 2.5563773  | C  | 0.0296147  | -4.1910867 | 0.7875723  |
| H | 2.2831037  | 6.8395163  | 2.6451752  | C  | 2.1019975  | -3.2913354 | -0.3985951 |
| H | 4.7732079  | 6.7665221  | 2.8670333  | H  | 3.3891259  | -4.6310716 | 1.6885107  |
| H | 4.7248888  | 2.4774746  | 2.2341025  | H  | 2.3227678  | -5.8229739 | 0.8857448  |
| H | 5.9859023  | 4.5748048  | 2.6175815  | C  | 3.9825754  | -0.2765854 | -1.9642933 |
| C | 4.3217602  | 0.5010115  | 5.3614880  | C  | 2.7854070  | -2.0466952 | -0.5070312 |
| C | 5.0213758  | -0.7216478 | 5.1761526  | C  | 1.5075444  | -3.7794282 | 0.9210360  |
| H | 2.9921846  | 1.9672499  | 4.5042033  | H  | 2.1860800  | 0.8239485  | -2.5732269 |
| H | 4.3924386  | 1.0305056  | 6.3239775  | H  | -0.5614938 | -3.3953264 | 0.2916123  |
| H | 5.6425079  | -1.1274144 | 5.9893076  | H  | 3.1774064  | 0.2323287  | -3.9517234 |
| H | 5.4160378  | -2.3735064 | 3.8325456  | H  | 0.6726364  | -3.4579497 | -4.9621643 |
| C | -1.8487938 | 4.0427871  | 0.0768326  | H  | -0.1012575 | -5.1266165 | 0.2031678  |
| C | -1.5116807 | 3.6234259  | 1.3943381  | H  | 4.3852182  | -4.4110796 | -4.7047127 |
| C | -3.1822469 | 3.8918007  | -0.3532891 | H  | 4.0241296  | 0.2312851  | -0.9800982 |
| C | -2.5113987 | 3.1009622  | 2.2582867  | H  | 1.5320687  | -2.9304770 | 1.6331938  |
| C | -3.8262256 | 2.9700093  | 1.7790592  | H  | 3.4411268  | -2.0891004 | -3.8755454 |
| C | -4.1836698 | 3.3482439  | 0.4717528  | Zn | -2.4559933 | 0.8231331  | -1.7400813 |
| H | -3.4570710 | 4.2050041  | -1.3720467 | Br | -3.7675295 | 1.7790537  | -3.4091141 |
| C | -2.1921338 | 2.7454908  | 3.7091886  | C  | -1.7162110 | -5.7023487 | -4.3279995 |
| H | -4.5987717 | 2.5637131  | 2.4518290  | C  | -2.1512935 | -1.5275509 | -3.5953774 |
| C | -2.5892952 | 1.3104844  | 4.0808196  | C  | -1.2245797 | -5.1484111 | -3.1288596 |
| H | -3.6840046 | 1.1453161  | 3.9999588  | C  | -2.4545053 | -3.5103935 | -5.0653617 |
| H | -2.2884212 | 1.0738926  | 5.1215046  | C  | -1.9614720 | -2.9516498 | -3.8641076 |
| H | -2.0804237 | 0.5839025  | 3.4197083  | C  | -2.3238182 | -4.8854320 | -5.2985943 |
| C | -2.8285575 | 3.7736888  | 4.6641130  | C  | -1.3326405 | -3.7748470 | -2.8977345 |
| H | -1.0926773 | 2.8208514  | 3.8379634  | O  | -1.7349438 | -0.9859413 | -2.5612101 |
| H | -3.9364396 | 3.7556034  | 4.5919133  | H  | -1.6215244 | -6.7844129 | -4.5075451 |
| H | -2.4940572 | 4.8036371  | 4.4248879  | H  | -2.9412802 | -2.8588728 | -5.8084558 |
| H | -2.5538415 | 3.5568995  | 5.7173182  | H  | -0.7487851 | -5.7967386 | -2.3781241 |
| C | -5.6179698 | 3.2199419  | -0.0286512 | H  | -2.7004646 | -5.3261301 | -6.2336165 |
| C | -6.1073118 | 1.7613053  | -0.0362864 | H  | -0.9397561 | -3.3110461 | -1.9805381 |
| H | -7.1556986 | 1.7037716  | -0.3960618 | Br | 0.3904297  | -1.7066354 | 3.9535909  |
| H | -6.0735385 | 1.3149642  | 0.9798180  | Zn | -1.2568466 | -1.6538074 | 2.2930625  |
| H | -5.4803371 | 1.1385736  | -0.7030413 | H  | -3.8921328 | -3.9347481 | -1.7603958 |
| C | -6.5689618 | 4.1281280  | 0.7726746  | H  | -3.5159582 | -2.7291438 | 3.0089343  |
| H | -5.6200442 | 3.5711684  | -1.0833321 | C  | -4.1868704 | -3.5073205 | 0.3726597  |
| H | -7.5976025 | 4.0865827  | 0.3578461  | C  | -4.5060057 | -3.3129122 | -1.0704110 |
| H | -6.2313813 | 5.1842113  | 0.7519044  | H  | -4.3189690 | -4.4643509 | 0.8951447  |
| H | -6.6241346 | 3.8144397  | 1.8364674  | C  | -3.7278523 | -2.3362849 | 0.9121745  |
| C | -0.8255353 | 4.7017540  | -0.8489897 | C  | -3.2466141 | -1.9727749 | 2.2472964  |
| C | -0.8828794 | 4.2170363  | -2.3056836 | C  | -3.7196601 | -1.3684202 | -0.2058531 |
| H | -0.0844374 | 4.7090269  | -2.8984911 | O  | -4.1936481 | -1.9290206 | -1.3357971 |
| H | -1.8495864 | 4.4525263  | -2.7954465 | O  | -3.3367166 | -0.1873745 | -0.1822309 |
| H | -0.7276267 | 3.1235322  | -2.3651352 | H  | -5.5758029 | -3.4791103 | -1.3255916 |
| C | -0.9751903 | 6.2356358  | -0.7819285 | H  | -3.6533764 | -0.9852057 | 2.5492731  |
| H | 0.1831994  | 4.4466300  | -0.4646466 | H  | -2.7277106 | -0.9276584 | -4.3470036 |
| H | -0.1979519 | 6.7357425  | -1.3966033 |    |            |            |            |
| H | -0.8879061 | 6.6135767  | 0.2565363  |    |            |            |            |
| H | -1.9685047 | 6.5492624  | -1.1665184 |    |            |            |            |
| H | 1.6347236  | -5.4333551 | -3.7309922 |    |            |            |            |
| H | 5.4908882  | -0.9846779 | -3.4076528 |    |            |            |            |
| H | 1.9157149  | -5.2116683 | 2.5257823  |    |            |            |            |
| C | 2.3044827  | -4.5958242 | -4.0265911 |    |            |            |            |
| H | 3.7284173  | 1.6403009  | -2.9940420 |    |            |            |            |
| H | 1.5038213  | -4.6025107 | -6.0664356 |    |            |            |            |
| H | -0.4044261 | -4.3775406 | 1.7935158  |    |            |            |            |
| C | 2.4355471  | -3.6865133 | -2.8105825 |    |            |            |            |
| C | 5.4395028  | -0.4939910 | -2.4130408 |    |            |            |            |
| C | 1.6571475  | -3.8900163 | -5.2297930 |    |            |            |            |
| H | 2.2957285  | -3.0659876 | -5.6106655 |    |            |            |            |
| C | 3.0660634  | -2.4335795 | -2.8985919 |    |            |            |            |
| C | 2.3310422  | -4.9236636 | 1.5378986  |    |            |            |            |
| H | 4.1152907  | -5.7529759 | -3.5509688 |    |            |            |            |
| C | 1.9607789  | -4.0884949 | -1.5509167 |    |            |            |            |
| C | 3.6685846  | -5.2042145 | -4.4045423 |    |            |            |            |
| H | 3.5685776  | -5.9097258 | -5.2557457 |    |            |            |            |
| H | 1.4577005  | -5.0655016 | -1.4646324 |    |            |            |            |
| C | 3.2221959  | 0.6550474  | -2.9259320 |    |            |            |            |

### int1-8-p

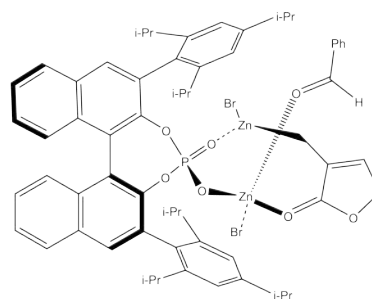

Energy(Hartree) = -11970.03418586

|   |           |           |           |
|---|-----------|-----------|-----------|
| C | 0.5263261 | 2.4014778 | 1.4837563 |
| C | 1.8879671 | 2.2572630 | 1.7715737 |
| C | 2.6288992 | 3.4523157 | 2.0984724 |
| C | 4.0505572 | 3.4613752 | 2.2242230 |
| C | 1.9185305 | 4.6952578 | 2.2807617 |
| C | 2.6497321 | 5.8717810 | 2.6218742 |
| C | 0.5025601 | 4.7236616 | 2.1234298 |

|   |            |            |            |    |            |            |            |
|---|------------|------------|------------|----|------------|------------|------------|
| H | -0.0388234 | 5.6592233  | 2.3317363  | H  | 2.0493130  | -4.8343661 | -6.1875719 |
| C | -0.2076981 | 3.6061090  | 1.7057343  | H  | -0.6067925 | -4.1608095 | 1.6223436  |
| C | 3.0250720  | -1.2267233 | 0.5990031  | C  | 2.4889111  | -3.8042873 | -2.8566273 |
| C | 3.7772241  | -1.6419342 | 1.6914476  | C  | 5.6782262  | -0.8082445 | -2.3612986 |
| H | 4.2858676  | -2.6170403 | 1.6520494  | C  | 2.2884035  | -4.0938800 | -5.3971881 |
| C | 3.8676323  | -0.8688168 | 2.8830225  | H  | 3.2531369  | -3.6210454 | -5.6755932 |
| C | 4.5638890  | -1.3616451 | 4.0266510  | C  | 3.1990971  | -2.5975648 | -2.9580762 |
| C | 3.2059551  | 0.4111232  | 2.9573288  | C  | 2.0939472  | -4.8646042 | 1.5138164  |
| C | 3.2151497  | 1.1030536  | 4.2046517  | H  | 3.5281391  | -6.3459663 | -3.0116648 |
| C | 2.5250568  | 0.9100352  | 1.7866271  | C  | 1.9279888  | -4.1267309 | -1.6079145 |
| C | 2.4237840  | 0.0646385  | 0.6810866  | C  | 3.5032592  | -5.8124845 | -3.9829981 |
| O | -0.2154534 | 1.3093092  | 1.0482346  | H  | 3.3906488  | -6.5665254 | -4.7900731 |
| O | 1.7290791  | 0.5149549  | -0.4402297 | H  | 1.3579807  | -5.0654632 | -1.5138948 |
| P | 0.0956798  | 0.5165907  | -0.3874246 | C  | 3.5985870  | 0.4547885  | -3.1205269 |
| O | -0.2985998 | 1.3376547  | -1.6230448 | H  | 6.2853686  | 0.1168622  | -2.4455485 |
| O | -0.5514772 | -0.8415244 | -0.1089908 | H  | 6.1218007  | -1.4395141 | -1.5648217 |
| C | 4.0296668  | 5.8418582  | 2.7535101  | C  | 3.3812849  | -1.7390733 | -1.8574130 |
| C | 4.7337720  | 4.6272044  | 2.5402799  | C  | -0.1243489 | -4.0201483 | 0.6334104  |
| H | 2.0935451  | 6.8111453  | 2.7679262  | C  | 2.0568450  | -3.2951313 | -0.4807168 |
| H | 4.5814574  | 6.7587298  | 3.0110374  | H  | 3.1599370  | -4.6299683 | 1.7055560  |
| H | 4.6058812  | 2.5282146  | 2.0549976  | H  | 2.0645370  | -5.7829621 | 0.8892279  |
| H | 5.8313102  | 4.6099541  | 2.6216088  | C  | 4.2082148  | -0.4694889 | -2.0511023 |
| C | 3.8840617  | 0.5862547  | 5.3050183  | C  | 2.8196080  | -2.0968779 | -0.6015468 |
| C | 4.5798273  | -0.6480314 | 5.2146796  | C  | 1.3682481  | -3.6960483 | 0.8235212  |
| H | 2.6669573  | 2.0503309  | 4.2962546  | H  | 2.5503512  | 0.7116458  | -2.8726983 |
| H | 3.8654577  | 1.1346789  | 6.2591550  | H  | -0.6381674 | -3.1849760 | 0.1182766  |
| H | 5.1118666  | -1.0447150 | 6.0927473  | H  | 3.6130298  | -0.0168695 | -4.1255101 |
| H | 5.0717571  | -2.3360344 | 3.9513764  | H  | 1.5081490  | -3.3070774 | -5.4188551 |
| C | -2.3237715 | 3.9867893  | 0.3638444  | H  | -0.2818734 | -4.9530468 | 0.0503122  |
| C | -1.7001537 | 3.5842920  | 1.5738211  | H  | 4.4866426  | -5.3144525 | -4.1144451 |
| C | -3.7256465 | 3.9189612  | 0.2768794  | H  | 4.2042035  | 0.0885154  | -1.0934307 |
| C | -2.4791192 | 3.0966977  | 2.6593761  | H  | 1.4047400  | -2.8258721 | 1.5088200  |
| C | -3.8787159 | 3.0464715  | 2.5172105  | H  | 3.6437233  | -2.3125171 | -3.9236282 |
| C | -4.5226323 | 3.4493659  | 1.3345560  | Zn | -1.6682430 | 0.8059967  | -2.9205222 |
| H | -4.2224795 | 4.2215568  | -0.6580392 | Br | -2.1436138 | 1.5478399  | -5.0570508 |
| C | -1.8204718 | 2.6590326  | 3.9689100  | C  | -1.4773329 | -6.1167732 | -4.2556041 |
| H | -4.4807376 | 2.6617847  | 3.3525963  | C  | -1.3042862 | -1.8590781 | -4.1861235 |
| C | -2.5434809 | 1.5035365  | 4.6760585  | C  | -1.2906001 | -5.4441642 | -3.0316222 |
| H | -3.5346003 | 1.8075974  | 5.0728654  | C  | -1.5143233 | -3.9984630 | -5.4394601 |
| H | -1.9390462 | 1.1443063  | 5.5324293  | C  | -1.3294726 | -3.3205374 | -4.2135192 |
| H | -2.6888554 | 0.6387418  | 3.9990224  | C  | -1.5830833 | -5.3969880 | -5.4593390 |
| C | -1.6555370 | 3.8618425  | 4.9183975  | C  | -1.2075694 | -4.0493758 | -3.0062927 |
| H | -0.8025873 | 2.2886022  | 3.7223444  | O  | -1.1442639 | -1.2191443 | -3.1368728 |
| H | -2.6461597 | 4.2827031  | 5.1906551  | H  | -1.5363042 | -7.2160731 | -4.2708417 |
| H | -1.0622352 | 4.6720212  | 4.4506229  | H  | -1.6038852 | -3.4192802 | -6.3723681 |
| H | -1.1421565 | 3.5583645  | 5.8542952  | H  | -1.1964727 | -6.0163132 | -2.0960844 |
| C | -6.0263061 | 3.2971777  | 1.1318926  | H  | -1.7230189 | -5.9306604 | -6.4111255 |
| C | -6.3397125 | 1.9080091  | 0.5382666  | H  | -1.0379712 | -3.4961344 | -2.0711130 |
| H | -7.4187406 | 1.8090531  | 0.2969158  | Br | -0.0686937 | -1.3489020 | 3.5379959  |
| H | -6.0728123 | 1.1064243  | 1.2583185  | Zn | -1.4792964 | -0.7626218 | 1.7809423  |
| H | -5.7564574 | 1.7275328  | -0.3873983 | H  | -3.7545386 | -3.6523856 | -1.7683330 |
| C | -6.8560824 | 3.5589830  | 2.3963423  | H  | -4.0220631 | -0.8042818 | 2.2922082  |
| H | -6.3216791 | 4.0553649  | 0.3725201  | C  | -4.3330993 | -2.4882830 | 0.0003606  |
| H | -7.9399360 | 3.5423291  | 2.1618040  | C  | -4.3884053 | -2.7898059 | -1.4594160 |
| H | -6.6157459 | 4.5433261  | 2.8461939  | H  | -4.6543731 | -3.1969371 | 0.7755267  |
| H | -6.6813218 | 2.7821186  | 3.1698062  | C  | -3.8055850 | -1.2401786 | 0.2014641  |
| C | -1.4981466 | 4.4712622  | -0.8259492 | C  | -3.4435022 | -0.4887973 | 1.4032900  |
| C | -2.1310408 | 4.1181719  | -2.1788366 | C  | -3.5257895 | -0.7161186 | -1.1552276 |
| H | -1.3965620 | 4.2167871  | -3.0017601 | O  | -3.8657267 | -1.6120096 | -2.1037706 |
| H | -2.9914755 | 4.7742120  | -2.4261445 | O  | -3.0519870 | 0.3894631  | -1.4578912 |
| H | -2.5139036 | 3.0785975  | -2.1868467 | H  | -5.4133780 | -2.9672995 | -1.8558004 |
| C | -1.2232901 | 5.9852648  | -0.7459783 | H  | -3.5479939 | 0.6041778  | 1.2507986  |
| H | -0.5218225 | 3.9441877  | -0.7752799 | H  | -1.4715801 | -1.3094041 | -5.1500027 |
| H | -0.6162714 | 6.3197717  | -1.6126045 |    |            |            |            |
| H | -0.6749637 | 6.2573254  | 0.1763127  |    |            |            |            |
| H | -2.1759257 | 6.5553402  | -0.7546153 |    |            |            |            |
| H | 1.4076698  | -5.3282623 | -3.8748753 |    |            |            |            |
| H | 5.7747503  | -1.3604888 | -3.3195097 |    |            |            |            |
| H | 1.6173840  | -5.0972702 | 2.4883833  |    |            |            |            |
| C | 2.3621313  | -4.7767218 | -4.0240521 |    |            |            |            |
| H | 4.1747571  | 1.4003123  | -3.1915042 |    |            |            |            |

int2-8-p; COSMO

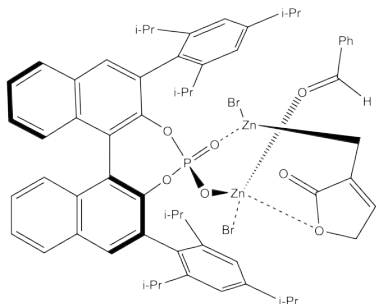

Energy(Hartree)= -11970.02654788

|   |            |            |            |
|---|------------|------------|------------|
| C | 0.5627710  | 2.4107392  | 1.6195832  |
| C | 1.9545393  | 2.3046000  | 1.5902060  |
| C | 2.7230731  | 3.5256550  | 1.6080285  |
| C | 4.1360144  | 3.5499023  | 1.4082714  |
| C | 2.0358788  | 4.7803183  | 1.8039934  |
| C | 2.7937859  | 5.9892085  | 1.8395631  |
| C | 0.6180258  | 4.7928200  | 1.9569764  |
| H | 0.1158981  | 5.7488546  | 2.1687377  |
| C | -0.1407996 | 3.6355569  | 1.8421028  |
| C | 2.8837279  | -1.2533794 | 0.4672236  |
| C | 3.8799559  | -1.5691322 | 1.3844927  |
| H | 4.4169324  | -2.5246952 | 1.2842440  |
| C | 4.2107764  | -0.7046131 | 2.4658504  |
| C | 5.1735040  | -1.0856553 | 3.4486172  |
| C | 3.5408356  | 0.5676723  | 2.5870108  |
| C | 3.8249155  | 1.3718342  | 3.7325719  |
| C | 2.5924957  | 0.9585947  | 1.5711251  |
| C | 2.2520956  | 0.0198123  | 0.5899956  |
| O | -0.1998862 | 1.2483222  | 1.4989375  |
| O | 1.3128087  | 0.3487559  | -0.3778092 |
| P | -0.2744903 | 0.5593771  | 0.0147207  |
| O | -0.7566963 | 1.6084766  | -1.0111407 |
| O | -0.9981698 | -0.7728325 | 0.1538487  |
| C | 4.1694514  | 5.9759355  | 1.6607509  |
| C | 4.8414707  | 4.7456169  | 1.4309169  |
| H | 2.2595733  | 6.9388439  | 2.0004469  |
| H | 4.7398754  | 6.9170136  | 1.6841110  |
| H | 4.6656798  | 2.6047591  | 1.2225080  |
| H | 5.9296254  | 4.7396456  | 1.2648437  |
| C | 4.7519459  | 0.9639194  | 4.6819585  |
| C | 5.4459758  | -0.2670443 | 4.5342700  |
| H | 3.2889087  | 2.3212116  | 3.8680853  |
| H | 4.9451769  | 1.5981791  | 5.5605658  |
| H | 6.1844552  | -0.5754540 | 5.2899248  |
| H | 5.6845172  | -2.0546872 | 3.3348036  |
| C | -2.5019961 | 3.9090379  | 0.9449904  |
| C | -1.6262835 | 3.5666274  | 2.0106148  |
| C | -3.8749964 | 3.6436684  | 1.0975302  |
| C | -2.1408413 | 3.0226404  | 3.2189556  |
| C | -3.5188853 | 2.7643494  | 3.3120030  |
| C | -4.3997965 | 3.0387727  | 2.2524720  |
| H | -4.5626295 | 3.8699804  | 0.2680595  |
| C | -1.2388504 | 2.7132503  | 4.4134391  |
| H | -3.9083816 | 2.3029963  | 4.2330474  |
| C | -1.2372299 | 1.2185108  | 4.7747250  |
| H | -2.2364931 | 0.8799483  | 5.1180257  |
| H | -0.5138696 | 1.0168736  | 5.5923913  |
| H | -0.9689283 | 0.5919240  | 3.9026862  |
| C | -1.6111622 | 3.5900783  | 5.6237775  |
| H | -0.2009683 | 2.9843324  | 4.1301417  |
| H | -2.6391541 | 3.3705265  | 5.9812140  |
| H | -1.5671547 | 4.6691490  | 5.3704057  |
| H | -0.9168250 | 3.4056054  | 6.4699295  |
| C | -5.8585974 | 2.6033589  | 2.3049870  |
| C | -5.9547458 | 1.0815072  | 2.0683416  |

|    |            |            |            |
|----|------------|------------|------------|
| H  | -7.0131903 | 0.7463605  | 2.0475624  |
| H  | -5.4299828 | 0.5205728  | 2.8701684  |
| H  | -5.4722222 | 0.7998863  | 1.1114411  |
| C  | -6.5717472 | 3.0164096  | 3.6022428  |
| H  | -6.3772572 | 3.1083640  | 1.4597318  |
| H  | -7.6467573 | 2.7444433  | 3.5620354  |
| H  | -6.4989423 | 4.1093825  | 3.7758082  |
| H  | -6.1385212 | 2.5041251  | 4.4864245  |
| C  | -1.9743941 | 4.5486884  | -0.3384069 |
| C  | -2.7407353 | 4.1226353  | -1.6004311 |
| H  | -2.1791492 | 4.4072836  | -2.5141199 |
| H  | -3.7363080 | 4.6091126  | -1.6701005 |
| H  | -2.9175512 | 3.0300460  | -1.6067481 |
| C  | -1.9585635 | 6.0857473  | -0.2231741 |
| H  | -0.9265540 | 4.2033714  | -0.4600567 |
| H  | -1.5428055 | 6.5469024  | -1.1434240 |
| H  | -1.3504568 | 6.4304873  | 0.6357947  |
| H  | -2.9883786 | 6.4757629  | -0.0802681 |
| H  | 1.0633273  | -5.7622420 | -3.5445956 |
| H  | 5.1676034  | -1.5936907 | -3.7939809 |
| H  | 1.4587385  | -4.6285876 | 2.9380356  |
| C  | 2.1157556  | -5.4012130 | -3.5804092 |
| H  | 3.4160242  | 1.0298214  | -3.6181528 |
| H  | 2.2358385  | -5.8933259 | -5.7033074 |
| H  | -0.8254548 | -4.0453645 | 1.9293865  |
| C  | 2.2056215  | -4.2364853 | -2.5987959 |
| C  | 5.1743451  | -0.9947941 | -2.8592586 |
| C  | 2.4310193  | -5.0311621 | -5.0338675 |
| H  | 3.4979526  | -4.7520022 | -5.1614922 |
| C  | 2.8580396  | -3.0307444 | -2.8995369 |
| C  | 1.9445703  | -4.5124732 | 1.9473754  |
| H  | 2.7676746  | -6.8831515 | -2.0807162 |
| C  | 1.6414458  | -4.3706369 | -1.3148700 |
| C  | 3.0159076  | -6.5634482 | -3.1124903 |
| H  | 2.9074791  | -7.4437039 | -3.7797934 |
| H  | 1.0763591  | -5.2872979 | -1.0807482 |
| C  | 2.9155594  | 0.0733020  | -3.3620394 |
| H  | 5.6952198  | -0.0404969 | -3.0807355 |
| H  | 5.7752970  | -1.5480327 | -2.1092009 |
| C  | 3.0306948  | -2.0126232 | -1.9390782 |
| C  | -0.3292397 | -4.0844614 | 0.9393293  |
| C  | 1.7766952  | -3.3831191 | -0.3235463 |
| H  | 2.9682377  | -4.1244891 | 2.1143562  |
| H  | 2.0362459  | -5.5209182 | 1.4913884  |
| C  | 3.7497193  | -0.7270083 | -2.3429616 |
| C  | 2.5334690  | -2.2157051 | -0.6260512 |
| C  | 1.1187442  | -3.5777949 | 1.0434953  |
| H  | 1.9148547  | 0.3114300  | -2.9522297 |
| H  | -0.9211200 | -3.4516282 | 0.2481556  |
| H  | 2.7772187  | -0.4949182 | -4.3065793 |
| H  | 1.8135973  | -4.1814904 | -5.3870483 |
| H  | -0.3838944 | -5.1307815 | 0.5723666  |
| H  | 4.0828556  | -6.2564438 | -3.1205263 |
| H  | 3.8487233  | -0.0966586 | -1.4360842 |
| H  | 1.0733664  | -2.5817355 | 1.5314602  |
| H  | 3.2705148  | -2.8737311 | -3.9071645 |
| Zn | -1.2000327 | 1.4387337  | -2.8556424 |
| Br | -0.9113676 | 2.3905014  | -4.9311224 |
| C  | -1.6998945 | -5.4233376 | -3.8765179 |
| C  | -0.5907791 | -1.3254103 | -3.9566487 |
| C  | -1.6861686 | -4.6804994 | -2.6787321 |
| C  | -0.8916391 | -3.4993865 | -5.1166553 |
| C  | -0.8937806 | -2.7458419 | -3.9186722 |
| C  | -1.3033616 | -4.8365577 | -5.0936031 |
| C  | -1.2876525 | -3.3429842 | -2.6957010 |
| O  | -0.7569564 | -0.5882985 | -2.9664754 |
| H  | -2.0204444 | -6.4764993 | -3.8602370 |
| H  | -0.5842270 | -3.0226849 | -6.0609910 |
| H  | -1.9861671 | -5.1520099 | -1.7310012 |
| H  | -1.3117866 | -5.4290905 | -6.0202987 |
| H  | -1.2721091 | -2.7280157 | -1.7840126 |



|    |            |            |            |
|----|------------|------------|------------|
| Br | -2.7657482 | -1.8231232 | 3.0926393  |
| Zn | -2.7595190 | -1.5702893 | 0.7665015  |
| H  | -2.8730679 | -0.2113900 | -4.6097199 |
| H  | -4.1636023 | -3.1909558 | -0.8873990 |
| C  | -4.0155696 | -1.4495805 | -3.1681682 |
| C  | -3.7174233 | -0.1719207 | -3.8882057 |
| H  | -4.2492096 | -2.3848368 | -3.6947596 |
| C  | -3.9842751 | -1.2548397 | -1.8188703 |
| C  | -4.1213299 | -2.1146897 | -0.6332088 |
| C  | -3.6513126 | 0.1682782  | -1.5977248 |
| O  | -3.3755242 | 0.7744676  | -2.8406162 |
| O  | -3.5542434 | 0.7923193  | -0.5639681 |
| H  | -4.5932612 | 0.2343184  | -4.4407238 |
| H  | -5.0480937 | -1.8547507 | -0.0730163 |
| H  | -0.2525086 | -0.8836208 | -4.9291588 |

## int2-8-p

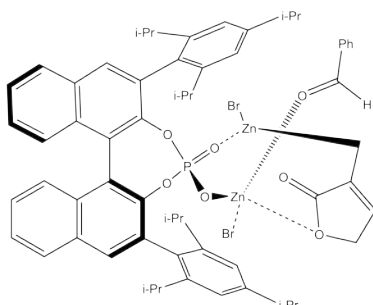

Energy(Hartree) = -11970.01277309

|   |            |            |            |
|---|------------|------------|------------|
| C | 0.5562132  | 2.4048426  | 1.6169902  |
| C | 1.9477276  | 2.3004620  | 1.5797505  |
| C | 2.7151517  | 3.5221096  | 1.5954082  |
| C | 4.1269102  | 3.5481648  | 1.3897916  |
| C | 2.0275942  | 4.7755761  | 1.7957308  |
| C | 2.7846683  | 5.9844434  | 1.8293285  |
| C | 0.6108237  | 4.7856940  | 1.9552375  |
| H | 0.1069936  | 5.7403289  | 2.1692272  |
| C | -0.1479810 | 3.6283220  | 1.8435500  |
| C | 2.8700715  | -1.2571075 | 0.4515690  |
| C | 3.8715427  | -1.5722961 | 1.3630628  |
| H | 4.4069561  | -2.5283025 | 1.2582541  |
| C | 4.2095535  | -0.7078010 | 2.4415419  |
| C | 5.1783745  | -1.0871351 | 3.4181959  |
| C | 3.5397449  | 0.5638714  | 2.5657740  |
| C | 3.8302727  | 1.3685388  | 3.7090362  |
| C | 2.5859851  | 0.9548794  | 1.5550886  |
| C | 2.2400136  | 0.0166501  | 0.5751257  |
| O | -0.2052223 | 1.2410255  | 1.4960037  |
| O | 1.2983305  | 0.3449575  | -0.3904385 |
| P | -0.2874159 | 0.5668333  | 0.0066215  |
| O | -0.7622488 | 1.6311291  | -1.0075510 |
| O | -1.0226065 | -0.7609882 | 0.1257915  |
| C | 4.1590498  | 5.9730658  | 1.6450179  |
| C | 4.8310036  | 4.7441765  | 1.4112179  |
| H | 2.2499423  | 6.9332299  | 1.9933333  |
| H | 4.7283615  | 6.9147794  | 1.6671111  |
| H | 4.6558536  | 2.6032315  | 1.2015378  |
| H | 5.9184320  | 4.7393204  | 1.2407734  |
| C | 4.7637737  | 0.9621293  | 4.6519564  |
| C | 5.4575518  | -0.2678706 | 4.5008668  |
| H | 3.2938194  | 2.3172041  | 3.8464954  |
| H | 4.9620852  | 1.5972584  | 5.5287127  |
| H | 6.2010307  | -0.5753823 | 5.2518788  |
| H | 5.6885334  | -2.0563394 | 3.3021340  |
| C | -2.5108997 | 3.9101485  | 0.9559143  |
| C | -1.6325764 | 3.5598557  | 2.0164196  |

|   |            |            |            |
|---|------------|------------|------------|
| C | -3.8839241 | 3.6486673  | 1.1125621  |
| C | -2.1434195 | 3.0107485  | 3.2237696  |
| C | -3.5212630 | 2.7548866  | 3.3196589  |
| C | -4.4056388 | 3.0386953  | 2.2658354  |
| H | -4.5745563 | 3.8826166  | 0.2876410  |
| C | -1.2386598 | 2.6990112  | 4.4154691  |
| H | -3.9083521 | 2.2900230  | 4.2398068  |
| C | -1.2446769 | 1.2066866  | 4.7851280  |
| H | -2.2442874 | 0.8735457  | 5.1323371  |
| H | -0.5218318 | 1.0053343  | 5.6030812  |
| H | -0.9796798 | 0.5717688  | 3.9182889  |
| C | -1.6010225 | 3.5857841  | 5.6216584  |
| H | -0.2000822 | 2.9624067  | 4.1271631  |
| H | -2.6295479 | 3.3759946  | 5.9829703  |
| H | -1.5511720 | 4.6629046  | 5.3618554  |
| H | -0.9061421 | 3.4013640  | 6.4672889  |
| C | -5.8660032 | 2.6094438  | 2.3241166  |
| C | -5.9719155 | 1.0899903  | 2.0767216  |
| H | -7.0318193 | 0.7591169  | 2.0666800  |
| H | -5.4399283 | 0.5191796  | 2.8666738  |
| H | -5.5037648 | 0.8153906  | 1.1108358  |
| C | -6.5689341 | 3.0169828  | 3.6285011  |
| H | -6.3876142 | 3.1237030  | 1.4861357  |
| H | -7.6463187 | 2.7542186  | 3.5923882  |
| H | -6.4854779 | 4.1074197  | 3.8115322  |
| H | -6.1358543 | 2.4935519  | 4.5060114  |
| C | -1.9856625 | 4.5536029  | -0.3267704 |
| C | -2.7470148 | 4.1218962  | -1.5903325 |
| H | -2.1813662 | 4.3979832  | -2.5044537 |
| H | -3.7406508 | 4.6107815  | -1.6698652 |
| H | -2.9319083 | 3.0304619  | -1.5871976 |
| C | -1.9804214 | 6.0904824  | -0.2121720 |
| H | -0.9354963 | 4.2154390  | -0.4473295 |
| H | -1.5687367 | 6.5553086  | -1.1323609 |
| H | -1.3739749 | 6.4388831  | 0.6463732  |
| H | -3.0122404 | 6.4737623  | -0.0668383 |
| H | 1.0874836  | -5.8096206 | -3.5307402 |
| H | 5.1753523  | -1.6263477 | -3.8026868 |
| H | 1.4016390  | -4.5775415 | 2.9431237  |
| C | 2.1370905  | -5.4392237 | -3.5616571 |
| H | 3.4383405  | 1.0023947  | -3.6331975 |
| H | 2.2804411  | -5.9577499 | -5.6779552 |
| H | -0.8712558 | -4.0305157 | 1.8986485  |
| C | 2.2089781  | -4.2609603 | -2.5947837 |
| C | 5.1830668  | -1.0295705 | -2.8666622 |
| C | 2.4620284  | -5.0859860 | -5.0171494 |
| H | 3.5278024  | -4.8005754 | -5.1392637 |
| C | 2.8671471  | -3.0598387 | -2.9000769 |
| C | 1.9020724  | -4.4719050 | 1.9588656  |
| H | 2.7908908  | -6.8930429 | -2.0362840 |
| C | 1.6269884  | -4.3798171 | -1.3175820 |
| C | 3.0440802  | -6.5863183 | -3.0705515 |
| H | 2.9511741  | -7.4772553 | -3.7259328 |
| H | 1.0582706  | -5.2935313 | -1.0804707 |
| C | 2.9306076  | 0.0513945  | -3.3715553 |
| H | 5.7107661  | -0.0786171 | -3.0858072 |
| H | 5.7791950  | -1.5883179 | -2.1171598 |
| C | 3.0318598  | -2.0336062 | -1.9470899 |
| C | -0.3619548 | -4.0864214 | 0.9161415  |
| C | 1.7526266  | -3.3833894 | -0.3338665 |
| H | 2.9172931  | -4.0677337 | 2.1366780  |
| H | 2.0143281  | -5.4860987 | 1.5206525  |
| C | 3.7596978  | -0.7534071 | -2.3520827 |
| C | 2.5187822  | -2.2229466 | -0.6383207 |
| C | 1.0789496  | -3.5620926 | 1.0277348  |
| H | 1.9338041  | 0.3018114  | -2.9599008 |
| H | -0.9523079 | -3.4751938 | 0.2041366  |
| H | 2.7850542  | -0.5186372 | -4.3140745 |
| H | 1.8420586  | -4.2451288 | -5.3864191 |
| H | -0.4010303 | -5.1413768 | 0.5716314  |
| H | 4.1075969  | -6.2684292 | -3.0726379 |

|    |            |            |            |
|----|------------|------------|------------|
| H  | 3.8612720  | -0.1233533 | -1.4452807 |
| H  | 1.0161190  | -2.5587813 | 1.4986942  |
| H  | 3.2943298  | -2.9145416 | -3.9033253 |
| Zn | -1.2349024 | 1.4916116  | -2.8449421 |
| Br | -0.9250258 | 2.3579568  | -4.9492313 |
| C  | -1.6524449 | -5.3832721 | -3.9160777 |
| C  | -0.5682579 | -1.2752770 | -3.9456940 |
| C  | -1.6635384 | -4.6483427 | -2.7143798 |
| C  | -0.8316122 | -3.4472608 | -5.1280651 |
| C  | -0.8600830 | -2.7012217 | -3.9268058 |
| C  | -1.2368153 | -4.7865321 | -5.1217036 |
| C  | -1.2722133 | -3.3080802 | -2.7155857 |
| O  | -0.7656081 | -0.5523407 | -2.9546487 |
| H  | -1.9677300 | -6.4382255 | -3.9128843 |
| H  | -0.5072076 | -2.9632548 | -6.0632026 |
| H  | -1.9757300 | -5.1253097 | -1.7733427 |
| H  | -1.2238351 | -5.3733349 | -6.0520224 |
| H  | -1.2759582 | -2.6983797 | -1.7999724 |
| Br | -2.7205681 | -1.8491732 | 3.1087026  |
| Zn | -2.7574749 | -1.5782862 | 0.8004505  |
| H  | -2.8691889 | -0.2054496 | -4.5856160 |
| H  | -4.1978302 | -3.1735350 | -0.8514398 |
| C  | -4.0097709 | -1.4497753 | -3.1413190 |
| C  | -3.7186481 | -0.1736047 | -3.8689483 |
| H  | -4.2319514 | -2.3919906 | -3.6602594 |
| C  | -3.9914332 | -1.2456098 | -1.7925369 |
| C  | -4.1311335 | -2.0968826 | -0.6045149 |
| C  | -3.6697633 | 0.1831192  | -1.5788389 |
| O  | -3.3931863 | 0.7817408  | -2.8284506 |
| O  | -3.5825639 | 0.8176690  | -0.5530854 |
| H  | -4.5950050 | 0.2214553  | -4.4301277 |
| H  | -5.0439982 | -1.8147886 | -0.0326959 |
| H  | -0.2139230 | -0.8173456 | -4.9062458 |

### int3-8-p; COSMO

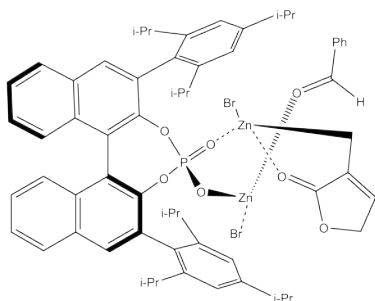

Energy(Hartree)= -11970.02041606

|   |            |            |            |
|---|------------|------------|------------|
| C | 0.3829240  | 2.1171197  | 1.2021669  |
| C | 1.7479293  | 1.9511002  | 1.4447499  |
| C | 2.5441532  | 3.1326570  | 1.6653823  |
| C | 3.9677812  | 3.0926571  | 1.7586966  |
| C | 1.8843374  | 4.4126303  | 1.7669773  |
| C | 2.6694114  | 5.5841539  | 1.9848083  |
| C | 0.4627757  | 4.4758380  | 1.6791139  |
| H | -0.0411932 | 5.4389998  | 1.8556731  |
| C | -0.3065490 | 3.3523635  | 1.3984019  |
| C | 2.8853452  | -1.5741692 | 0.4243524  |
| C | 3.5885376  | -1.9591859 | 1.5609855  |
| H | 4.1266354  | -2.9196192 | 1.5549474  |
| C | 3.6207827  | -1.1602914 | 2.7376893  |
| C | 4.2700151  | -1.6151068 | 3.9242947  |
| C | 2.9803403  | 0.1316230  | 2.7341004  |
| C | 2.9784849  | 0.8889630  | 3.9438393  |
| C | 2.3303413  | 0.5825640  | 1.5289211  |
| C | 2.2240444  | -0.3115459 | 0.4609796  |
| O | -0.3813147 | 1.0129083  | 0.8541256  |
| O | 1.5021134  | 0.0683129  | -0.6680571 |
| P | -0.1284490 | 0.2592642  | -0.5782672 |

|   |            |            |            |
|---|------------|------------|------------|
| O | -0.3888543 | 1.2108307  | -1.7719274 |
| O | -0.9151684 | -1.0452610 | -0.5247786 |
| C | 4.0514629  | 5.5095473  | 2.0807965  |
| C | 4.7034980  | 4.2531955  | 1.9574119  |
| H | 2.1539441  | 6.5538088  | 2.0699786  |
| H | 4.6450718  | 6.4218958  | 2.2447183  |
| H | 4.4819492  | 2.1260884  | 1.6581216  |
| H | 5.8014009  | 4.1993242  | 2.0159589  |
| C | 3.6031291  | 0.4107349  | 5.0874009  |
| C | 4.2666557  | -0.8455417 | 5.0778940  |
| H | 2.4559225  | 1.8552359  | 3.9716074  |
| H | 3.5759243  | 1.0072817  | 6.0121418  |
| H | 4.7625573  | -1.2114656 | 5.9899153  |
| H | 4.7618226  | -2.6005341 | 3.9091977  |
| C | -2.5935016 | 3.7767992  | 0.3593817  |
| C | -1.8037248 | 3.4010738  | 1.4724783  |
| C | -3.9838596 | 3.9151783  | 0.5237901  |
| C | -2.4247779 | 3.0950569  | 2.7138704  |
| C | -3.8180070 | 3.2422452  | 2.8267699  |
| C | -4.6172910 | 3.6650294  | 1.7509436  |
| H | -4.6063263 | 4.2124533  | -0.3354880 |
| C | -1.6227605 | 2.6143495  | 3.9213921  |
| H | -4.2959101 | 3.0084297  | 3.7915142  |
| C | -2.1890811 | 1.3096111  | 4.5057228  |
| H | -3.1955204 | 1.4573644  | 4.9510884  |
| H | -1.5239190 | 0.9246972  | 5.3055833  |
| H | -2.2598934 | 0.5267969  | 3.7255162  |
| C | -1.5059792 | 3.7212947  | 4.9848599  |
| H | -0.5946481 | 2.3848187  | 3.5755652  |
| H | -2.5055561 | 4.0098887  | 5.3734155  |
| H | -1.0318119 | 4.6330329  | 4.5668431  |
| H | -0.8937299 | 3.3793149  | 5.8452996  |
| C | -6.1280498 | 3.8024538  | 1.8942673  |
| C | -6.7938987 | 2.4306538  | 2.1105393  |
| H | -7.8985047 | 2.5277270  | 2.1618957  |
| H | -6.4519005 | 1.9663475  | 3.0592936  |
| H | -6.5372425 | 1.7364155  | 1.2864414  |
| C | -6.5168706 | 4.7966463  | 3.0023191  |
| H | -6.5066761 | 4.2087377  | 0.9301386  |
| H | -7.6179829 | 4.9281758  | 3.0470859  |
| H | -6.0572763 | 5.7912988  | 2.8319964  |
| H | -6.1846198 | 4.4394911  | 3.9995388  |
| C | -1.9606298 | 4.0125382  | -1.0070129 |
| C | -2.7545875 | 3.3186806  | -2.1268377 |
| H | -2.1992104 | 3.3782832  | -3.0927940 |
| H | -3.7324874 | 3.7965308  | -2.3397588 |
| H | -3.0201905 | 2.2745793  | -1.8257351 |
| C | -1.7780000 | 5.5089763  | -1.3126991 |
| H | -0.9554318 | 3.5448651  | -0.9900099 |
| H | -1.2975114 | 5.6603383  | -2.3018042 |
| H | -1.1397520 | 5.9904871  | -0.5454294 |
| H | -2.7549065 | 6.0362748  | -1.3189863 |
| H | 2.7903485  | -6.0713382 | -3.9698307 |
| H | 6.2614563  | -1.3718584 | -3.0985864 |
| H | 0.9269476  | -5.3049636 | 2.0236288  |
| C | 3.6705464  | -5.3899648 | -3.9276973 |
| H | 4.3157829  | 1.0992809  | -3.1439958 |
| H | 4.0275699  | -5.6737106 | -6.0671691 |
| H | -0.9423230 | -4.4343448 | 0.4972211  |
| C | 3.3480559  | -4.3179143 | -2.8918779 |
| C | 5.9871556  | -0.8865291 | -2.1386272 |
| C | 3.9111223  | -4.8423701 | -5.3426499 |
| H | 4.8387001  | -4.2354893 | -5.3939347 |
| C | 3.9623771  | -3.0535332 | -2.9099297 |
| C | 1.6624070  | -5.1445559 | 1.2086206  |
| H | 4.6839305  | -6.6763269 | -2.4562783 |
| C | 2.4524980  | -4.5945938 | -1.8429348 |
| C | 4.8717813  | -6.2340557 | -3.4551391 |
| H | 5.0851135  | -7.0593862 | -4.1660345 |
| H | 1.9241699  | -5.5627400 | -1.8380022 |
| C | 3.8415577  | 0.0967910  | -3.1018897 |

|    |            |            |            |
|----|------------|------------|------------|
| H  | 6.4670842  | 0.1137076  | -2.1263648 |
| H  | 6.4273781  | -1.4888689 | -1.3181339 |
| C  | 3.7649657  | -2.1096460 | -1.8830127 |
| C  | -0.1945290 | -4.3233435 | -0.3168773 |
| C  | 2.2095762  | -3.6809828 | -0.8005982 |
| H  | 2.6372917  | -4.9021992 | 1.6778489  |
| H  | 1.7814867  | -6.1015608 | 0.6571001  |
| C  | 4.4628764  | -0.7545908 | -1.9772981 |
| C  | 2.9172971  | -2.4483256 | -0.7930807 |
| C  | 1.1881763  | -4.0132402 | 0.2817287  |
| H  | 2.7557746  | 0.2404469  | -2.9340088 |
| H  | -0.5304366 | -3.5030662 | -0.9806458 |
| H  | 3.9815684  | -0.3840362 | -4.0932776 |
| H  | 3.0752688  | -4.2007467 | -5.6900844 |
| H  | -0.1990916 | -5.2660907 | -0.9039323 |
| H  | 5.7825259  | -5.6038254 | -3.3774383 |
| H  | 4.2866453  | -0.2171983 | -1.0235023 |
| H  | 1.0600626  | -3.1091745 | 0.9107769  |
| H  | 4.6392666  | -2.7942632 | -3.7383943 |
| Zn | -1.6740537 | 1.2164794  | -3.1916814 |
| Br | -1.4262010 | 1.6342739  | -5.4429056 |
| C  | 0.1769848  | -4.0950972 | -4.3314336 |
| C  | -2.9341257 | -1.5377019 | -2.9669583 |
| C  | 0.4684624  | -2.7312751 | -4.1289760 |
| C  | -2.1081094 | -3.7404901 | -3.6169906 |
| C  | -1.8344252 | -2.3616635 | -3.4318934 |
| C  | -1.1079214 | -4.6022283 | -4.0755821 |
| C  | -0.5306320 | -1.8658088 | -3.6886271 |
| O  | -2.9624664 | -0.2993387 | -2.8076505 |
| H  | 0.9688031  | -4.7715140 | -4.6834567 |
| H  | -3.1175074 | -4.1240317 | -3.3991496 |
| H  | 1.4890384  | -2.3559772 | -4.2936137 |
| H  | -1.3219716 | -5.6706037 | -4.2247700 |
| H  | -0.2849198 | -0.8082046 | -3.5217918 |
| Br | -0.4863342 | -1.8882894 | 2.9223062  |
| Zn | -1.9839980 | -1.7534389 | 1.1005391  |
| H  | -5.6586540 | 0.2158061  | -2.3425759 |
| H  | -3.9092014 | -3.5044755 | 0.2363932  |
| C  | -5.5999075 | -1.4199282 | -0.8818420 |
| C  | -5.8656477 | 0.0032734  | -1.2697316 |
| H  | -6.1628376 | -2.2684672 | -1.2964256 |
| C  | -4.5898940 | -1.4624252 | 0.0310530  |
| C  | -3.8277759 | -2.5164743 | 0.7296206  |
| C  | -4.1721256 | -0.0490477 | 0.2466438  |
| O  | -4.9495009 | 0.7934444  | -0.4878615 |
| O  | -3.2337848 | 0.3411030  | 0.9320634  |
| H  | -6.9043669 | 0.3365486  | -1.0496863 |
| H  | -4.2047877 | -2.6299527 | 1.7719502  |
| H  | -3.8749303 | -2.0884379 | -2.7257179 |

|   |            |            |            |
|---|------------|------------|------------|
| H | -0.0858933 | 5.4322062  | 1.8534756  |
| C | -0.3342874 | 3.3406862  | 1.4136928  |
| C | 2.8787783  | -1.5587187 | 0.4040097  |
| C | 3.6056855  | -1.9314928 | 1.5296468  |
| H | 4.1465230  | -2.8903026 | 1.5188634  |
| C | 3.6578815  | -1.1244676 | 2.6993234  |
| C | 4.3324034  | -1.5665227 | 3.8759900  |
| C | 3.0094369  | 0.1630637  | 2.6985288  |
| C | 3.0252639  | 0.9284879  | 3.9030341  |
| C | 2.3348912  | 0.6024987  | 1.5024526  |
| C | 2.2128968  | -0.2986527 | 0.4413592  |
| O | -0.3875229 | 0.9998871  | 0.8794218  |
| O | 1.4712140  | 0.0683221  | -0.6791221 |
| P | -0.1571145 | 0.2739893  | -0.5688393 |
| O | -0.4241395 | 1.2574438  | -1.7343957 |
| O | -0.9528187 | -1.0265195 | -0.5341116 |
| C | 4.0089611  | 5.5529996  | 2.0087298  |
| C | 4.6738904  | 4.3046998  | 1.8794422  |
| H | 2.0993306  | 6.5735855  | 2.0269629  |
| H | 4.5937505  | 6.4733537  | 2.1585725  |
| H | 4.4724206  | 2.1733584  | 1.5931423  |
| H | 5.7731311  | 4.2644318  | 1.9199419  |
| C | 3.6751645  | 0.4621625  | 5.0368322  |
| C | 4.3466140  | -0.7891400 | 5.0234093  |
| H | 2.4959012  | 1.8908165  | 3.9344239  |
| H | 3.6609679  | 1.0647387  | 5.9578387  |
| H | 4.8616591  | -1.1458175 | 5.9283373  |
| H | 4.8285989  | -2.5496181 | 3.8584131  |
| C | -2.6176656 | 3.8221781  | 0.4056829  |
| C | -1.8308889 | 3.3745835  | 1.4931455  |
| C | -4.0066083 | 3.9646686  | 0.5807169  |
| C | -2.4545801 | 2.9814689  | 2.7098253  |
| C | -3.8450269 | 3.1363867  | 2.8327649  |
| C | -4.6398412 | 3.6444600  | 1.7902488  |
| H | -4.6269022 | 4.3201190  | -0.2581755 |
| C | -1.6457971 | 2.4081298  | 3.8723305  |
| H | -4.3269925 | 2.8360630  | 3.7756796  |
| C | -2.3513080 | 1.2352540  | 4.5701243  |
| H | -3.2481329 | 1.5621723  | 5.1374301  |
| H | -1.6627849 | 0.7496306  | 5.2902878  |
| H | -2.6567396 | 0.4655308  | 3.8350822  |
| C | -1.2568540 | 3.5143848  | 4.8710217  |
| H | -0.7052033 | 1.9959041  | 3.4533281  |
| H | -2.1612725 | 3.9748814  | 5.3218241  |
| H | -0.6786268 | 4.3217980  | 4.3774418  |
| H | -0.6364166 | 3.1025743  | 5.6941102  |
| C | -6.1492559 | 3.7852152  | 1.9442823  |
| C | -6.8286884 | 2.4055648  | 2.0304505  |
| H | -7.9324520 | 2.5064914  | 2.0919416  |
| H | -6.4898902 | 1.8503380  | 2.9300786  |
| H | -6.5776647 | 1.7892078  | 1.1449428  |
| C | -6.5323784 | 4.6761599  | 3.1382264  |
| H | -6.5214168 | 4.2829821  | 1.0211780  |
| H | -7.6319625 | 4.8166456  | 3.1909873  |
| H | -6.0595223 | 5.6760936  | 3.0638831  |
| H | -6.2101827 | 4.2242777  | 4.0994433  |
| C | -1.9909167 | 4.1055612  | -0.9551616 |
| C | -2.7751352 | 3.4174871  | -2.0866842 |
| H | -2.2272375 | 3.5027892  | -3.0536593 |
| H | -3.7666846 | 3.8763462  | -2.2782101 |
| H | -3.0117975 | 2.3610067  | -1.8054450 |
| C | -1.8407538 | 5.6108850  | -1.2312826 |
| H | -0.9764973 | 3.6571181  | -0.9504820 |
| H | -1.3706946 | 5.7936979  | -2.2201143 |
| H | -1.2071729 | 6.0898250  | -0.4588426 |
| H | -2.8273852 | 6.1195537  | -1.2195588 |
| H | 2.7319043  | -6.1093497 | -3.9419990 |
| H | 6.2176258  | -1.4123203 | -3.1749258 |
| H | 0.8975429  | -5.2143283 | 2.0920737  |
| C | 3.6485145  | -5.4825767 | -3.8457447 |
| H | 4.2651543  | 1.0482253  | -3.2161571 |

### int3-8-p

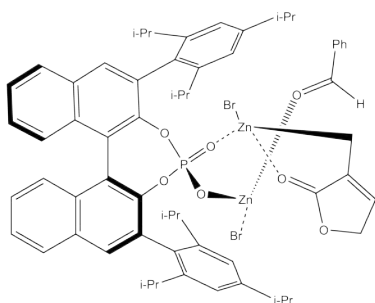

Energy(Hartree)= -11970.00731372

|   |           |           |           |
|---|-----------|-----------|-----------|
| C | 0.3681455 | 2.1148648 | 1.2124433 |
| C | 1.7390818 | 1.9655414 | 1.4268752 |
| C | 2.5246161 | 3.1569121 | 1.6291282 |
| C | 3.9496353 | 3.1347624 | 1.6977780 |
| C | 1.8506483 | 4.4287346 | 1.7379659 |
| C | 2.6251706 | 5.6099990 | 1.9367730 |
| C | 0.4272100 | 4.4740751 | 1.6755501 |

|    |            |            |            |
|----|------------|------------|------------|
| H  | 4.1366404  | -5.8344803 | -5.9490136 |
| H  | -0.9714350 | -4.3942954 | 0.5441947  |
| C  | 3.3213127  | -4.3733634 | -2.8505542 |
| C  | 5.9593946  | -0.9196986 | -2.2142285 |
| C  | 4.0269819  | -4.9830008 | -5.2474306 |
| H  | 4.9967021  | -4.4437798 | -5.2401149 |
| C  | 3.9389003  | -3.1121458 | -2.9005792 |
| C  | 1.6298293  | -5.0846089 | 1.2692591  |
| H  | 4.4691212  | -6.7989564 | -2.2833585 |
| C  | 2.4170719  | -4.6172300 | -1.8003971 |
| C  | 4.7556502  | -6.3911333 | -3.2731503 |
| H  | 4.9672063  | -7.2431399 | -3.9523626 |
| H  | 1.8836187  | -5.5823362 | -1.7717442 |
| C  | 3.7932757  | 0.0462477  | -3.1479701 |
| H  | 6.4379037  | 0.0811387  | -2.2205143 |
| H  | 6.4167279  | -1.5139400 | -1.3975039 |
| C  | 3.7423116  | -2.1418570 | -1.8979383 |
| C  | -0.2274184 | -4.3022615 | -0.2755107 |
| C  | 2.1772494  | -3.6783958 | -0.7809239 |
| H  | 2.6072323  | -4.8322886 | 1.7272388  |
| H  | 1.7428881  | -6.0584971 | 0.7467431  |
| C  | 4.4386938  | -0.7888203 | -2.0246538 |
| C  | 2.8940228  | -2.4510445 | -0.8007488 |
| C  | 1.1569933  | -3.9791227 | 0.3113144  |
| H  | 2.7116890  | 0.1942635  | -2.9587306 |
| H  | -0.5647141 | -3.4969834 | -0.9567909 |
| H  | 3.9135007  | -0.4486132 | -4.1353463 |
| H  | 3.2673999  | -4.2908865 | -5.6660472 |
| H  | -0.2351000 | -5.2589568 | -0.8400033 |
| H  | 5.6959425  | -5.8169786 | -3.1381743 |
| H  | 4.2794241  | -0.2389149 | -1.0749452 |
| H  | 1.0310196  | -3.0586784 | 0.9168219  |
| H  | 4.6199271  | -2.8761076 | -3.7322562 |
| Zn | -1.6622345 | 1.2964385  | -3.1871404 |
| Br | -1.4342134 | 1.8067129  | -5.4096758 |
| C  | 0.3159431  | -3.9572156 | -4.3798839 |
| C  | -2.8558053 | -1.4963520 | -2.9746863 |
| C  | 0.5625314  | -2.5824627 | -4.1967021 |
| C  | -1.9624636 | -3.6762608 | -3.6153732 |
| C  | -1.7356563 | -2.2867941 | -3.4518068 |
| C  | -0.9437026 | -4.5065802 | -4.0890605 |
| C  | -0.4567754 | -1.7480807 | -3.7428620 |
| O  | -2.9306790 | -0.2588845 | -2.8374127 |
| H  | 1.1232547  | -4.6067745 | -4.7454091 |
| H  | -2.9514458 | -4.0929514 | -3.3665338 |
| H  | 1.5651347  | -2.1732139 | -4.3870678 |
| H  | -1.1222973 | -5.5837449 | -4.2212252 |
| H  | -0.2457985 | -0.6798786 | -3.5962457 |
| Br | -0.5237466 | -1.8493101 | 2.9291486  |
| Zn | -2.0110261 | -1.7233408 | 1.1149705  |
| H  | -5.6073406 | 0.2154192  | -2.4439595 |
| H  | -3.9658815 | -3.4668255 | 0.2870100  |
| C  | -5.5883565 | -1.3964796 | -0.9514271 |
| C  | -5.8422585 | 0.0207314  | -1.3730834 |
| H  | -6.1442148 | -2.2532079 | -1.3586022 |
| C  | -4.6053142 | -1.4225711 | -0.0085332 |
| C  | -3.8675090 | -2.4590585 | 0.7344626  |
| C  | -4.1877988 | -0.0050900 | 0.1877114  |
| O  | -4.9474228 | 0.8243335  | -0.5841090 |
| O  | -3.2648020 | 0.3966108  | 0.8829989  |
| H  | -6.8864051 | 0.3582410  | -1.1845309 |
| H  | -4.2481497 | -2.5176568 | 1.7798824  |
| H  | -3.7697076 | -2.0795769 | -2.7031536 |

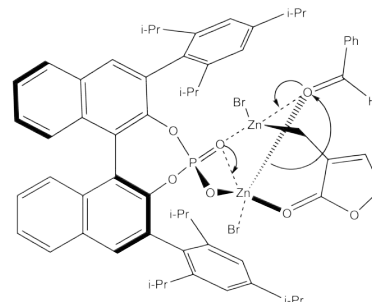

Energy(Hartree)= -11970.002712

|   |           |           |           |
|---|-----------|-----------|-----------|
| C | 1.198987  | 2.332269  | 1.068837  |
| C | 2.592294  | 2.348608  | 0.932624  |
| C | 3.241822  | 3.632700  | 0.847953  |
| C | 4.628660  | 3.774059  | 0.542277  |
| C | 2.457644  | 4.828449  | 1.047348  |
| C | 3.105819  | 6.098880  | 0.997694  |
| C | 1.053037  | 4.723985  | 1.265964  |
| H | 0.474730  | 5.643275  | 1.445181  |
| C | 0.392950  | 3.500558  | 1.242917  |
| C | 3.750621  | -1.098787 | -0.341151 |
| C | 4.861056  | -1.323187 | 0.464237  |
| H | 5.465339  | -2.228639 | 0.304013  |
| C | 5.217724  | -0.439494 | 1.523995  |
| C | 6.307377  | -0.738970 | 2.395318  |
| C | 4.448210  | 0.761812  | 1.749564  |
| C | 4.771203  | 1.571945  | 2.878583  |
| C | 3.363722  | 1.070709  | 0.850479  |
| C | 3.030986  | 0.115546  | -0.113639 |
| O | 0.545543  | 1.109041  | 1.105086  |
| O | 1.933576  | 0.369166  | -0.934743 |
| P | 0.460703  | 0.187298  | -0.251800 |
| O | -0.483753 | 0.859299  | -1.275663 |
| O | 0.185831  | -1.230132 | 0.223225  |
| C | 4.461647  | 6.199520  | 0.725417  |
| C | 5.222973  | 5.026084  | 0.480016  |
| H | 2.500789  | 7.003531  | 1.166873  |
| H | 4.946507  | 7.186581  | 0.683802  |
| H | 5.225065  | 2.872948  | 0.343300  |
| H | 6.292378  | 5.108538  | 0.232956  |
| C | 5.824221  | 1.239254  | 3.719342  |
| C | 6.610798  | 0.083605  | 3.469379  |
| H | 4.162751  | 2.462996  | 3.087126  |
| H | 6.045797  | 1.873220  | 4.591313  |
| H | 7.448503  | -0.165819 | 4.138144  |
| H | 6.893331  | -1.652081 | 2.206139  |
| C | -1.987468 | 3.662466  | 0.362550  |
| C | -1.094459 | 3.386018  | 1.435421  |
| C | -3.373277 | 3.567904  | 0.594277  |
| C | -1.612321 | 3.012090  | 2.708049  |
| C | -3.007992 | 2.944162  | 2.886643  |
| C | -3.911509 | 3.225142  | 1.845705  |
| H | -4.070274 | 3.782702  | -0.231359 |
| C | -0.685628 | 2.694909  | 3.881751  |
| H | -3.399080 | 2.658151  | 3.876320  |
| C | -0.686196 | 1.195490  | 4.233753  |
| H | -1.683017 | 0.860157  | 4.587894  |
| H | 0.042363  | 0.984529  | 5.043207  |
| H | -0.409799 | 0.570988  | 3.363342  |
| C | -1.003097 | 3.560536  | 5.113956  |
| H | 0.345254  | 2.955726  | 3.564810  |
| H | -2.001116 | 3.322860  | 5.537953  |
| H | -0.992171 | 4.640949  | 4.864542  |
| H | -0.256525 | 3.383372  | 5.915125  |
| C | -5.425103 | 3.201627  | 2.047810  |
| C | -5.958847 | 1.823767  | 2.468783  |
| H | -7.065647 | 1.839409  | 2.552414  |

## 7.2.4.8 to 15b-ma

### TS1-8-b; woelfling data

|    |           |           |           |    |           |           |           |
|----|-----------|-----------|-----------|----|-----------|-----------|-----------|
| H  | -5.552780 | 1.508330  | 3.452661  | Br | -0.981638 | -3.093602 | 3.344680  |
| H  | -5.679864 | 1.043256  | 1.739937  | Zn | -1.353753 | -1.717870 | 1.485635  |
| C  | -5.889446 | 4.284056  | 3.037690  | C  | -5.122369 | -1.438159 | 1.397198  |
| H  | -5.875273 | 3.438963  | 1.058162  | C  | -6.125863 | -1.490548 | 0.298282  |
| H  | -6.997498 | 4.299566  | 3.104025  | C  | -4.029069 | -0.705854 | 0.997117  |
| H  | -5.546388 | 5.292280  | 2.732463  | C  | -2.804214 | -0.293831 | 1.657188  |
| H  | -5.497595 | 4.085689  | 4.057110  | C  | -4.306455 | -0.354965 | -0.409400 |
| C  | -1.488759 | 4.140569  | -1.000988 | O  | -5.517284 | -0.781365 | -0.800446 |
| C  | -2.247526 | 3.531796  | -2.189992 | O  | -3.592390 | 0.273807  | -1.213730 |
| H  | -1.767431 | 3.815383  | -3.147714 | H  | -7.080380 | -0.971117 | 0.544990  |
| H  | -3.304937 | 3.862551  | -2.237416 | H  | -5.288996 | -1.869590 | 2.393003  |
| H  | -2.257657 | 2.426393  | -2.127647 | H  | -2.425828 | -2.801727 | -2.297549 |
| C  | -1.554573 | 5.679619  | -1.079214 | H  | -2.924516 | -0.226835 | 2.753796  |
| H  | -0.426862 | 3.832733  | -1.095398 | H  | -2.424901 | 0.665278  | 1.257036  |
| H  | -1.153606 | 6.048679  | -2.045722 |    |           |           |           |
| H  | -0.976095 | 6.155881  | -0.264154 |    |           |           |           |
| H  | -2.604940 | 6.028042  | -0.988305 |    |           |           |           |
| H  | 1.345622  | -5.697755 | -3.864746 |    |           |           |           |
| H  | 5.060869  | -1.288672 | -4.949398 |    |           |           |           |
| H  | 3.655251  | -5.021927 | 1.912904  |    |           |           |           |
| C  | 1.598769  | -4.751425 | -4.392661 |    |           |           |           |
| H  | 3.467280  | 1.418856  | -4.333826 |    |           |           |           |
| H  | -0.235890 | -4.817946 | -5.607410 |    |           |           |           |
| H  | 1.098208  | -4.526536 | 1.854877  |    |           |           |           |
| C  | 2.246799  | -3.836283 | -3.361984 |    |           |           |           |
| C  | 5.270406  | -0.706880 | -4.027348 |    |           |           |           |
| C  | 0.280269  | -4.136380 | -4.899248 |    |           |           |           |
| H  | 0.461329  | -3.174471 | -5.422262 |    |           |           |           |
| C  | 2.813626  | -2.601390 | -3.720160 |    |           |           |           |
| C  | 3.727627  | -4.744549 | 0.840861  |    |           |           |           |
| H  | 3.480421  | -5.566477 | -5.182435 |    |           |           |           |
| C  | 2.232508  | -4.175449 | -2.001951 |    |           |           |           |
| C  | 2.541388  | -5.108322 | -5.553204 |    |           |           |           |
| H  | 2.058043  | -5.827013 | -6.247059 |    |           |           |           |
| H  | 1.791633  | -5.140954 | -1.708308 |    |           |           |           |
| C  | 2.999127  | 0.449175  | -4.065449 |    |           |           |           |
| H  | 5.773397  | 0.234782  | -4.330837 |    |           |           |           |
| H  | 5.982994  | -1.297477 | -3.416516 |    |           |           |           |
| C  | 3.334880  | -1.713408 | -2.763000 |    |           |           |           |
| C  | 1.232707  | -4.392856 | 0.764354  |    |           |           |           |
| C  | 2.721739  | -3.318759 | -0.998248 |    |           |           |           |
| H  | 4.736326  | -4.321046 | 0.663438  |    |           |           |           |
| H  | 3.652214  | -5.678570 | 0.244600  |    |           |           |           |
| C  | 3.975249  | -0.413376 | -3.245827 |    |           |           |           |
| C  | 3.279526  | -2.066709 | -1.384446 |    |           |           |           |
| C  | 2.601110  | -3.765187 | 0.457242  |    |           |           |           |
| H  | 2.075683  | 0.656970  | -3.490544 |    |           |           |           |
| H  | 0.411272  | -3.741953 | 0.412107  |    |           |           |           |
| H  | 2.707559  | -0.050457 | -5.012788 |    |           |           |           |
| H  | -0.410313 | -3.918406 | -4.059559 |    |           |           |           |
| H  | 1.113732  | -5.387414 | 0.286134  |    |           |           |           |
| H  | 2.815845  | -4.211300 | -6.146330 |    |           |           |           |
| H  | 4.266233  | 0.175954  | -2.352188 |    |           |           |           |
| H  | 2.695632  | -2.862200 | 1.094859  |    |           |           |           |
| H  | 2.845052  | -2.311621 | -4.782614 |    |           |           |           |
| C  | -5.158585 | -5.701057 | 0.051496  |    |           |           |           |
| C  | -4.146362 | -4.737024 | 0.034436  |    |           |           |           |
| C  | -3.754311 | -4.169027 | -1.200890 |    |           |           |           |
| C  | -4.381785 | -4.559200 | -2.404370 |    |           |           |           |
| C  | -5.390232 | -5.529927 | -2.379940 |    |           |           |           |
| C  | -5.773241 | -6.100727 | -1.153642 |    |           |           |           |
| H  | -5.468489 | -6.158894 | 1.003022  |    |           |           |           |
| H  | -3.631781 | -4.414164 | 0.954186  |    |           |           |           |
| C  | -2.678149 | -3.178403 | -1.269339 |    |           |           |           |
| H  | -4.063056 | -4.092396 | -3.350732 |    |           |           |           |
| H  | -5.873131 | -5.848666 | -3.315677 |    |           |           |           |
| H  | -6.557619 | -6.873009 | -1.135386 |    |           |           |           |
| O  | -2.063583 | -2.739056 | -0.295407 |    |           |           |           |
| Zn | -1.922133 | 0.094019  | -2.244694 |    |           |           |           |
| Br | -2.062019 | -0.891917 | -4.304239 |    |           |           |           |
| H  | -6.376172 | -2.511229 | -0.069211 |    |           |           |           |

### TS2-8-b; COSMO

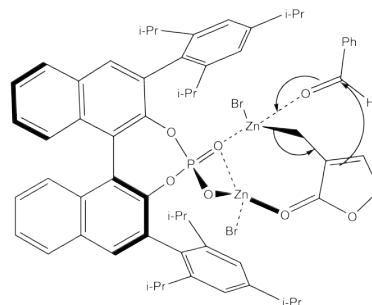

Energy(Hartree)= -11970.02351785

|   |            |            |            |
|---|------------|------------|------------|
| C | 0.7610663  | 2.4828686  | 0.6889110  |
| C | 2.1578296  | 2.4731028  | 0.7074698  |
| C | 2.8311603  | 3.7514671  | 0.7280301  |
| C | 4.2436075  | 3.8783815  | 0.5646136  |
| C | 2.0501584  | 4.9558708  | 0.8826748  |
| C | 2.7146828  | 6.2184933  | 0.9188291  |
| C | 0.6329762  | 4.8656814  | 0.9998456  |
| H | 0.0535072  | 5.7818753  | 1.1916721  |
| C | -0.0334472 | 3.6520712  | 0.8871363  |
| C | 3.5273937  | -0.9100033 | -0.4997790 |
| C | 4.5349779  | -1.1402128 | 0.4272714  |
| H | 5.2085004  | -1.9995497 | 0.2904297  |
| C | 4.7160269  | -0.2966696 | 1.5622090  |
| C | 5.6891199  | -0.6042163 | 2.5592407  |
| C | 3.9004329  | 0.8839771  | 1.7173836  |
| C | 4.0631942  | 1.6719929  | 2.8946894  |
| C | 2.9238192  | 1.1947920  | 0.7018928  |
| C | 2.7189368  | 0.2471057  | -0.2982143 |
| O | 0.0601405  | 1.2782477  | 0.5632241  |
| O | 1.7061061  | 0.4646132  | -1.2421892 |
| P | 0.1501473  | 0.3823285  | -0.7970945 |
| O | -0.6462226 | 0.8769905  | -2.0255683 |
| O | -0.4118875 | -1.0111952 | -0.3779642 |
| C | 4.0916337  | 6.3041478  | 0.7777531  |
| C | 4.8574659  | 5.1232938  | 0.5857999  |
| H | 2.1072978  | 7.1278733  | 1.0495124  |
| H | 4.5909435  | 7.2847272  | 0.8009037  |
| H | 4.8479454  | 2.9744539  | 0.4065176  |
| H | 5.9470600  | 5.1947922  | 0.4473311  |
| C | 5.0054590  | 1.3335081  | 3.8561039  |
| C | 5.8360422  | 0.1943842  | 3.6836143  |
| H | 3.4162595  | 2.5471415  | 3.0472511  |
| H | 5.1031945  | 1.9488985  | 4.7634766  |
| H | 6.5835037  | -0.0609025 | 4.4501870  |
| H | 6.3115096  | -1.5028837 | 2.4256250  |
| C | -2.4181706 | 3.5561766  | 0.0016383  |
| C | -1.5107869 | 3.5088502  | 1.0968668  |

|   |            |            |            |    |            |            |            |
|---|------------|------------|------------|----|------------|------------|------------|
| C | -3.7851776 | 3.3611659  | 0.2565133  | H  | 4.6998632  | 0.4452916  | -2.0862773 |
| C | -1.9871864 | 3.2798380  | 2.4142065  | H  | 1.9082546  | -2.6261358 | 0.3583510  |
| C | -3.3694727 | 3.0791224  | 2.6115830  | H  | 3.8087424  | -1.6120299 | -5.1135936 |
| C | -4.2858976 | 3.1106219  | 1.5492909  | C  | -3.9366129 | -6.8366703 | 2.6189185  |
| H | -4.4961316 | 3.3964801  | -0.5833664 | C  | -3.2993398 | -5.6082067 | 2.4064732  |
| C | -1.0499075 | 3.2440452  | 3.6219872  | C  | -3.3583763 | -4.9899290 | 1.1384120  |
| H | -3.7293842 | 2.8911348  | 3.6338530  | C  | -4.0419801 | -5.6320291 | 0.0829874  |
| C | -0.9474428 | 1.8362758  | 4.2348750  | C  | -4.6777675 | -6.8650878 | 0.2994994  |
| H | -1.9376300 | 1.4712280  | 4.5806909  | C  | -4.6321430 | -7.4657502 | 1.5683243  |
| H | -0.2674722 | 1.8419861  | 5.1117229  | H  | -3.8880276 | -7.3148217 | 3.6094696  |
| H | -0.5403095 | 1.1021271  | 3.5119862  | H  | -2.7379935 | -5.1110703 | 3.2122356  |
| C | -1.4487466 | 4.2936495  | 4.6752514  | C  | -2.6805928 | -3.6861363 | 0.8950177  |
| H | -0.0348674 | 3.5145835  | 3.2671173  | H  | -4.0455253 | -5.1756365 | -0.9207151 |
| H | -2.4411640 | 4.0729448  | 5.1211390  | H  | -5.2017458 | -7.3639182 | -0.5301575 |
| H | -1.4973985 | 5.3100549  | 4.2338450  | H  | -5.1296856 | -8.4329305 | 1.7383027  |
| H | -0.7107128 | 4.3129362  | 5.5035330  | O  | -1.6718069 | -3.3621052 | 1.6338950  |
| C | -5.7800664 | 2.8530564  | 1.7327412  | Zn | -1.9153136 | -0.6597773 | -2.1091146 |
| C | -6.1554395 | 1.4506108  | 1.2114974  | Br | -2.4393049 | -2.5539422 | -3.2830937 |
| H | -7.2497491 | 1.2793304  | 1.2803008  | H  | -5.4320173 | -3.4523721 | -0.0511686 |
| H | -5.6475749 | 0.6677816  | 1.8137855  | Br | 1.1480784  | -1.3251412 | 2.8955418  |
| H | -5.8550843 | 1.3165983  | 0.1532636  | Zn | -0.7500712 | -1.6354413 | 1.5698917  |
| C | -6.2810758 | 3.0507209  | 3.1683589  | C  | -4.2323430 | -2.4016947 | 1.4926844  |
| H | -6.3066316 | 3.5923134  | 1.0874895  | C  | -5.3210315 | -2.4734991 | 0.4580929  |
| H | -7.3855423 | 2.9618928  | 3.2084746  | C  | -3.5576064 | -1.1680892 | 1.2889262  |
| H | -6.0030107 | 4.0467557  | 3.5682059  | C  | -2.5801523 | -0.5055519 | 2.0397872  |
| H | -5.8672141 | 2.2822689  | 3.8546766  | C  | -3.9017527 | -0.7852899 | -0.1007880 |
| C | -1.9265628 | 3.8627284  | -1.4114981 | O  | -4.9280235 | -1.5054528 | -0.5544790 |
| C | -2.7798062 | 3.2226972  | -2.5167490 | O  | -3.3289493 | 0.0481143  | -0.8284373 |
| H | -2.2633782 | 3.3085801  | -3.4936869 | H  | -6.3162664 | -2.1695063 | 0.8485237  |
| H | -3.7649129 | 3.7237169  | -2.6214503 | H  | -4.3863937 | -2.8370123 | 2.4900968  |
| H | -2.9605060 | 2.1500077  | -2.3157479 | H  | -2.6793192 | -3.3765699 | -0.1807987 |
| C | -1.8164067 | 5.3848039  | -1.6314732 | H  | -2.5587751 | -0.6751320 | 3.1283306  |
| H | -0.9057133 | 3.4348992  | -1.5007431 | H  | -2.2631308 | 0.4939975  | 1.6953318  |
| H | -1.4346481 | 5.6078048  | -2.6494244 |    |            |            |            |
| H | -1.1317222 | 5.8582806  | -0.9010145 |    |            |            |            |
| H | -2.8108479 | 5.8667776  | -1.5247236 |    |            |            |            |
| H | 1.9595717  | -4.9331189 | -5.0572301 |    |            |            |            |
| H | 5.8670728  | -0.5657747 | -4.7596294 |    |            |            |            |
| H | 2.7112518  | -4.7618745 | 1.3396356  |    |            |            |            |
| C | 2.3053931  | -3.9226725 | -5.3687288 |    |            |            |            |
| H | 4.2867308  | 2.0694443  | -3.9141947 |    |            |            |            |
| H | 0.7414566  | -3.7607386 | -6.9083077 |    |            |            |            |
| H | 0.2802661  | -4.4165971 | 0.5726407  |    |            |            |            |
| C | 2.7225220  | -3.1912751 | -4.0990154 |    |            |            |            |
| C | 5.9346224  | -0.1834168 | -3.7196213 |    |            |            |            |
| C | 1.1058203  | -3.2044648 | -6.0193475 |    |            |            |            |
| H | 1.3933504  | -2.1841179 | -6.3505166 |    |            |            |            |
| C | 3.4641412  | -1.9986251 | -4.1413724 |    |            |            |            |
| C | 3.0778305  | -4.4270161 | 0.3472735  |    |            |            |            |
| H | 4.3218518  | -4.6231412 | -5.9003468 |    |            |            |            |
| C | 2.2944259  | -3.6542758 | -2.8432754 |    |            |            |            |
| C | 3.4563508  | -4.1123516 | -6.3689808 |    |            |            |            |
| H | 3.1248451  | -4.7207670 | -7.2355031 |    |            |            |            |
| H | 1.7079515  | -4.5850426 | -2.8022415 |    |            |            |            |
| C | 3.7423667  | 1.1023842  | -3.8942253 |    |            |            |            |
| H | 6.5087146  | 0.7658514  | -3.7507249 |    |            |            |            |
| H | 6.5174275  | -0.9189728 | -3.1287109 |    |            |            |            |
| C | 3.7596718  | -1.2627315 | -2.9791806 |    |            |            |            |
| C | 0.6894868  | -4.2064560 | -0.4347495 |    |            |            |            |
| C | 2.5581203  | -2.9562509 | -1.6504618 |    |            |            |            |
| H | 4.0522353  | -3.9236434 | 0.4997120  |    |            |            |            |
| H | 3.2571180  | -5.3267100 | -0.2785899 |    |            |            |            |
| C | 4.5405751  | 0.0446155  | -3.1084479 |    |            |            |            |
| C | 3.2982940  | -1.7447201 | -1.7236867 |    |            |            |            |
| C | 2.0463462  | -3.4964419 | -0.3186071 |    |            |            |            |
| H | 2.7484793  | 1.2725748  | -3.4354271 |    |            |            |            |
| H | -0.0466054 | -3.5856599 | -0.9837734 |    |            |            |            |
| H | 3.5818778  | 0.7859837  | -4.9462746 |    |            |            |            |
| H | 0.2637266  | -3.0988897 | -5.3051538 |    |            |            |            |
| H | 0.7729642  | -5.1793964 | -0.9625344 |    |            |            |            |
| H | 3.8140924  | -3.1411791 | -6.7704003 |    |            |            |            |

### TS2-8-b

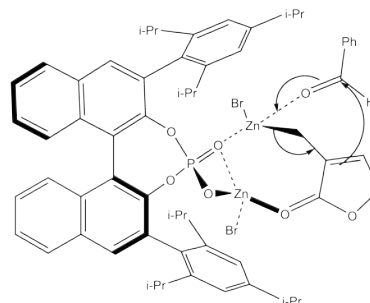

Energy(Hartree) = -11970.01085767  
number of imaginary frequencies: 1

|   |            |            |            |
|---|------------|------------|------------|
| C | 0.7604918  | 2.4812614  | 0.6921697  |
| C | 2.1574306  | 2.4743840  | 0.7091748  |
| C | 2.8284450  | 3.7539496  | 0.7272964  |
| C | 4.2404333  | 3.8828066  | 0.5633338  |
| C | 2.0461290  | 4.9573889  | 0.8806608  |
| C | 2.7092081  | 6.2202898  | 0.9146013  |
| C | 0.6295344  | 4.8645546  | 0.9986151  |
| H | 0.0473368  | 5.7793457  | 1.1891392  |
| C | -0.0352776 | 3.6500385  | 0.8885129  |
| C | 3.5300894  | -0.9077277 | -0.4966799 |
| C | 4.5406744  | -1.1332119 | 0.4280007  |
| H | 5.2142049  | -1.9922549 | 0.2897631  |
| C | 4.7236879  | -0.2882060 | 1.5610752  |
| C | 5.6995316  | -0.5917720 | 2.5559505  |
| C | 3.9058910  | 0.8905847  | 1.7168899  |
| C | 4.0702129  | 1.6803747  | 2.8925229  |
| C | 2.9259239  | 1.1976811  | 0.7035733  |
| C | 2.7201620  | 0.2482774  | -0.2948425 |
| O | 0.0612396  | 1.2763417  | 0.5697103  |

|   |            |            |            |    |            |            |            |
|---|------------|------------|------------|----|------------|------------|------------|
| O | 1.7052543  | 0.4629293  | -1.2369015 | H  | 1.7113053  | -4.5961278 | -2.7750565 |
| P | 0.1504870  | 0.3780699  | -0.7901425 | C  | 3.7230101  | 1.0926900  | -3.8992340 |
| O | -0.6516952 | 0.8730650  | -2.0146378 | H  | 6.4917764  | 0.7630246  | -3.7696965 |
| O | -0.4082206 | -1.0165412 | -0.3679805 | H  | 6.5068017  | -0.9195330 | -3.1414399 |
| C | 4.0854407  | 6.3078810  | 0.7731536  | C  | 3.7516631  | -1.2692908 | -2.9756244 |
| C | 4.8523692  | 5.1281746  | 0.5828582  | C  | 0.7059988  | -4.2153855 | -0.4044516 |
| H | 2.1004743  | 7.1289958  | 1.0437113  | C  | 2.5625305  | -2.9612227 | -1.6340538 |
| H | 4.5831724  | 7.2892471  | 0.7946436  | H  | 4.0714037  | -3.9169300 | 0.5121868  |
| H | 4.8448840  | 2.9787593  | 0.4072414  | H  | 3.2781524  | -5.3244783 | -0.2582581 |
| H | 5.9418453  | 5.2006998  | 0.4444136  | C  | 4.5280619  | 0.0397837  | -3.1140718 |
| C | 5.0157970  | 1.3454344  | 3.8512549  | C  | 3.2979881  | -1.7475868 | -1.7162384 |
| C | 5.8479971  | 0.2083501  | 3.6783071  | C  | 2.0602383  | -3.4990276 | -0.2976040 |
| H | 3.4209798  | 2.5536621  | 3.0451755  | H  | 2.7307696  | 1.2619525  | -3.4370198 |
| H | 5.1140889  | 1.9619947  | 4.7576717  | H  | -0.0351958 | -3.6010705 | -0.9539198 |
| H | 6.5974151  | -0.0449455 | 4.4435104  | H  | 3.5573792  | 0.7722189  | -4.9491585 |
| H | 6.3222468  | -1.4901704 | 2.4225498  | H  | 0.2486339  | -3.1234022 | -5.2775956 |
| C | -2.4198137 | 3.5527592  | 0.0036152  | H  | 0.7912340  | -5.1901307 | -0.9285771 |
| C | -1.5124656 | 3.5071458  | 1.0987744  | H  | 3.7934651  | -3.1638499 | -6.7589839 |
| C | -3.7867145 | 3.3608143  | 0.2597783  | H  | 4.6917593  | 0.4444417  | -2.0940580 |
| C | -1.9887388 | 3.2833630  | 2.4168829  | H  | 1.9221361  | -2.6278472 | 0.3784368  |
| C | -3.3710462 | 3.0853824  | 2.6149820  | H  | 3.7910550  | -1.6268805 | -5.1083084 |
| C | -4.2873101 | 3.1150274  | 1.5530113  | C  | -3.9367483 | -6.8546836 | 2.5389766  |
| H | -4.4974266 | 3.3948396  | -0.5803043 | C  | -3.2937246 | -5.6257127 | 2.3509279  |
| C | -1.0518204 | 3.2522728  | 3.6251234  | C  | -3.3479507 | -4.9836597 | 1.0950568  |
| H | -3.7308783 | 2.9023154  | 3.6381437  | C  | -4.0294739 | -5.6041092 | 0.0257610  |
| C | -0.9484083 | 1.8475181  | 4.2443964  | C  | -4.6706141 | -6.8381153 | 0.2181195  |
| H | -1.9382812 | 1.4839091  | 4.5928703  | C  | -4.6319546 | -7.4612958 | 1.4756936  |
| H | -0.2685896 | 1.8562677  | 5.1211264  | H  | -3.8917217 | -7.3520541 | 3.5201712  |
| H | -0.5401409 | 1.1091946  | 3.5265100  | H  | -2.7274923 | -5.1455535 | 3.1635175  |
| C | -1.4512191 | 4.3065916  | 4.6733177  | C  | -2.6682229 | -3.6757656 | 0.8791158  |
| H | -0.0368683 | 3.5215882  | 3.2690126  | H  | -4.0234067 | -5.1293786 | -0.9695317 |
| H | -2.4435026 | 4.0882553  | 5.1204865  | H  | -5.1924180 | -7.3209848 | -0.6222799 |
| H | -1.5012163 | 5.3208638  | 4.2275581  | H  | -5.1336584 | -8.4294356 | 1.6264950  |
| H | -0.7139318 | 4.3304197  | 5.5020492  | O  | -1.6639017 | -3.3653569 | 1.6273106  |
| C | -5.7818981 | 2.8605623  | 1.7373826  | Zn | -1.9169692 | -0.6655179 | -2.0895703 |
| C | -6.1597790 | 1.4568722  | 1.2215305  | Br | -2.4685950 | -2.5241055 | -3.2967497 |
| H | -7.2544719 | 1.2870991  | 1.2901483  | H  | -5.4295092 | -3.4417328 | -0.0408022 |
| H | -5.6527372 | 0.6760245  | 1.8272235  | Br | 1.1511866  | -1.3014639 | 2.9127790  |
| H | -5.8583648 | 1.3172024  | 0.1644502  | Zn | -0.7278699 | -1.6452731 | 1.5832800  |
| C | -6.2829883 | 3.0649528  | 3.1718922  | C  | -4.2211659 | -2.4058186 | 1.5027389  |
| H | -6.3072207 | 3.5987032  | 1.0896863  | C  | -5.3170542 | -2.4655803 | 0.4743502  |
| H | -7.3875733 | 2.9785805  | 3.2136027  | C  | -3.5489426 | -1.1685498 | 1.3083300  |
| H | -6.0026143 | 4.0617082  | 3.5677638  | C  | -2.5675202 | -0.5131306 | 2.0576584  |
| H | -5.8708121 | 2.2985601  | 3.8614445  | C  | -3.8984355 | -0.7759215 | -0.0775576 |
| C | -1.9285329 | 3.8532723  | -1.4109219 | O  | -4.9309224 | -1.4906461 | -0.5307150 |
| C | -2.7850184 | 3.2129384  | -2.5133614 | O  | -3.3260699 | 0.0571369  | -0.8034084 |
| H | -2.2685758 | 3.2923347  | -3.4906202 | H  | -6.3106208 | -2.1645493 | 0.8732160  |
| H | -3.7679469 | 3.7178091  | -2.6204372 | H  | -4.3664019 | -2.8548121 | 2.4954300  |
| H | -2.9709734 | 2.1420620  | -2.3082356 | H  | -2.6648627 | -3.3462816 | -0.1911646 |
| C | -1.8132071 | 5.3740113  | -1.6362891 | H  | -2.5349430 | -0.6905640 | 3.1445737  |
| H | -0.9097735 | 3.4209783  | -1.5007518 | H  | -2.2452979 | 0.4859233  | 1.7169768  |
| H | -1.4316182 | 5.5922476  | -2.6552198 |    |            |            |            |
| H | -1.1255953 | 5.8473976  | -0.9088150 |    |            |            |            |
| H | -2.8053384 | 5.8605352  | -1.5298832 |    |            |            |            |
| H | 1.9516946  | -4.9522918 | -5.0292497 |    |            |            |            |
| H | 5.8481233  | -0.5739040 | -4.7693257 |    |            |            |            |
| H | 2.7379240  | -4.7559755 | 1.3613120  |    |            |            |            |
| C | 2.2928144  | -3.9420249 | -5.3469124 |    |            |            |            |
| H | 4.2642535  | 2.0613087  | -3.9263571 |    |            |            |            |
| H | 0.7206196  | -3.7908918 | -6.8795711 |    |            |            |            |
| H | 0.3023415  | -4.4243898 | 0.6053458  |    |            |            |            |
| C | 2.7146315  | -3.2047693 | -4.0822617 |    |            |            |            |
| C | 5.9194773  | -0.1870524 | -3.7313416 |    |            |            |            |
| C | 1.0879293  | -3.2303672 | -5.9945224 |    |            |            |            |
| H | 1.3706273  | -2.2106622 | -6.3313668 |    |            |            |            |
| C | 3.4523943  | -2.0105479 | -4.1329242 |    |            |            |            |
| C | 3.0981275  | -4.4239261 | 0.3659361  |    |            |            |            |
| H | 4.3087523  | -4.6395334 | -5.8843719 |    |            |            |            |
| C | 2.2948618  | -3.6639752 | -2.8228064 |    |            |            |            |
| C | 3.4396314  | -4.1337734 | -6.3513052 |    |            |            |            |
| H | 3.1064651  | -4.7463725 | -7.2141924 |    |            |            |            |

### int1-8-b; COSMO

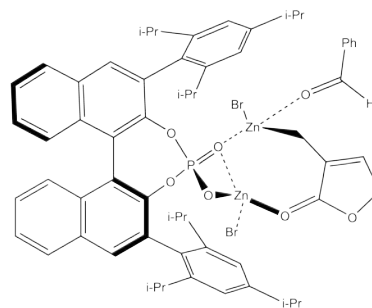

Energy(Hartree)= -11970.03380575

|   |           |           |           |
|---|-----------|-----------|-----------|
| C | 0.7944179 | 2.3836797 | 0.7333431 |
| C | 2.1907805 | 2.3697217 | 0.7620710 |
| C | 2.8732230 | 3.6427465 | 0.7544986 |
| C | 4.2882405 | 3.7561617 | 0.6027759 |
| C | 2.0983211 | 4.8556407 | 0.8641123 |

|   |            |            |            |    |            |            |            |
|---|------------|------------|------------|----|------------|------------|------------|
| C | 2.7695638  | 6.1152487  | 0.8653879  | C  | 2.5480776  | -4.1529691 | -5.2241433 |
| C | 0.6807642  | 4.7748612  | 0.9782552  | H  | 4.2430906  | 1.9449825  | -3.8712549 |
| H | 0.1047910  | 5.6987240  | 1.1421928  | H  | 1.0791609  | -4.0449755 | -6.8579373 |
| C | 0.0068726  | 3.5616172  | 0.9037540  | H  | 0.4355832  | -4.5425801 | 0.7199026  |
| C | 3.5881697  | -1.0161141 | -0.3894693 | C  | 2.9014428  | -3.3781384 | -3.9609798 |
| C | 4.5852156  | -1.2298210 | 0.5532341  | C  | 5.9805863  | -0.2303084 | -3.5898639 |
| H | 5.2698864  | -2.0823618 | 0.4300066  | C  | 1.3968147  | -3.4536485 | -5.9735929 |
| C | 4.7403141  | -0.3804611 | 1.6873904  | H  | 1.7126339  | -2.4509878 | -6.3318407 |
| C | 5.7010229  | -0.6714797 | 2.7012078  | C  | 3.5879736  | -2.1530739 | -4.0178333 |
| C | 3.9126467  | 0.7938791  | 1.8214941  | C  | 3.2336347  | -4.5575659 | 0.4900142  |
| C | 4.0530262  | 1.5954121  | 2.9924713  | H  | 4.5828867  | -4.8972557 | -5.6060408 |
| C | 2.9503363  | 1.0885969  | 0.7887982  | C  | 2.4793643  | -3.8367513 | -2.7020088 |
| C | 2.7621901  | 0.1315218  | -0.2056640 | C  | 3.7576064  | -4.3876475 | -6.1435139 |
| O | 0.0948603  | 1.1782251  | 0.6230898  | H  | 3.4731801  | -5.0151371 | -7.0133433 |
| O | 1.7566473  | 0.3336907  | -1.1591054 | H  | 1.9324726  | -4.7910159 | -2.6495658 |
| P | 0.1946016  | 0.2550239  | -0.7234760 | C  | 3.7397062  | 0.9562828  | -3.8392293 |
| O | -0.6028126 | 0.7336135  | -1.9570960 | H  | 6.5139937  | 0.7419042  | -3.6353471 |
| O | -0.3605737 | -1.1325623 | -0.2803934 | H  | 6.5820630  | -0.9241853 | -2.9679804 |
| C | 4.1482988  | 6.1885951  | 0.7352288  | C  | 3.8393987  | -1.3844749 | -2.8669909 |
| C | 4.9091470  | 4.9977017  | 0.5902081  | C  | 0.8436808  | -4.3567286 | -0.2928716 |
| H | 2.1661949  | 7.0316131  | 0.9613980  | C  | 2.7011023  | -3.1065519 | -1.5194874 |
| H | 4.6531873  | 7.1666122  | 0.7315057  | H  | 4.2057748  | -4.0473403 | 0.6350286  |
| H | 4.8888383  | 2.8442366  | 0.4802744  | H  | 3.4179887  | -5.4634369 | -0.1257954 |
| H | 6.0005915  | 5.0586041  | 0.4614310  | C  | 4.5654436  | -0.0476100 | -3.0125555 |
| C | 4.9842099  | 1.2733574  | 3.9701283  | C  | 3.3904249  | -1.8669570 | -1.6069332 |
| C | 5.8252638  | 0.1385910  | 3.8202079  | C  | 2.1961279  | -3.6390651 | -0.1827615 |
| H | 3.3974778  | 2.4675102  | 3.1260111  | H  | 2.7307340  | 1.0943720  | -3.4032915 |
| H | 5.0651627  | 1.8982273  | 4.8726987  | H  | 0.1139751  | -3.7417973 | -0.8555386 |
| H | 6.5635895  | -0.1038228 | 4.5997566  | H  | 3.6146097  | 0.6097026  | -4.8865473 |
| H | 6.3328873  | -1.5659659 | 2.5846465  | H  | 0.5165780  | -3.3103917 | -5.3141582 |
| C | -2.3951916 | 3.4845998  | 0.0639817  | H  | 0.9295145  | -5.3391923 | -0.8028567 |
| C | -1.4692291 | 3.4539645  | 1.1424319  | H  | 4.1559333  | -3.4323981 | -6.5450248 |
| C | -3.7660367 | 3.3799688  | 0.3548393  | H  | 4.6865492  | 0.3836037  | -1.9975810 |
| C | -1.9271838 | 3.3157934  | 2.4807088  | H  | 2.0435773  | -2.7673491 | 0.4877190  |
| C | -3.3132759 | 3.2091662  | 2.7145307  | H  | 3.9241474  | -1.7688180 | -4.9941928 |
| C | -4.2505052 | 3.2435381  | 1.6697134  | C  | -4.7300919 | -6.5093094 | 1.4732169  |
| H | -4.4928868 | 3.4129013  | -0.4718735 | C  | -3.7330695 | -5.5352337 | 1.5656220  |
| C | -0.9521699 | 3.2463794  | 3.6571068  | C  | -3.4355806 | -4.7301435 | 0.4395746  |
| H | -3.6630085 | 3.0972612  | 3.7508295  | C  | -4.1396596 | -4.9119965 | -0.7748701 |
| C | -0.7074511 | 1.7909577  | 4.0980007  | C  | -5.1388651 | -5.8914113 | -0.8587135 |
| H | -1.6410122 | 1.3329494  | 4.4869911  | C  | -5.4324684 | -6.6871624 | 0.2625802  |
| H | 0.0531851  | 1.7465887  | 4.9045352  | H  | -4.9681440 | -7.1396977 | 2.3433316  |
| H | -0.3428999 | 1.1552247  | 3.2679522  | H  | -3.1709755 | -5.3725087 | 2.4975878  |
| C | -1.3850762 | 4.1225901  | 4.8441844  | C  | -2.4256533 | -3.6767385 | 0.5083802  |
| H | 0.0205387  | 3.6443602  | 3.3029554  | H  | -3.8927248 | -4.2800137 | -1.6443526 |
| H | -2.3105873 | 3.7437183  | 5.3260438  | H  | -5.6886577 | -6.0376882 | -1.8004333 |
| H | -1.5716691 | 5.1700725  | 4.5310701  | H  | -6.2164965 | -7.4572634 | 0.1956981  |
| H | -0.5950877 | 4.1311406  | 5.6228332  | O  | -1.7549722 | -3.4050128 | 1.5165055  |
| C | -5.7540427 | 3.1120024  | 1.9002394  | Zn | -1.7995181 | -0.8897072 | -2.0099146 |
| C | -6.2316331 | 1.6833275  | 1.5719387  | Br | -2.0575209 | -2.6796743 | -3.4328377 |
| H | -7.3353763 | 1.6023200  | 1.6591775  | H  | -5.9110551 | -3.1950447 | 0.5620355  |
| H | -5.7740002 | 0.9513305  | 2.2689384  | Br | 1.1047634  | -1.6221384 | 2.9646210  |
| H | -5.9467618 | 1.3876422  | 0.5416585  | Zn | -0.9192269 | -1.4513191 | 1.7846113  |
| C | -6.2119885 | 3.5280604  | 3.3039977  | C  | -4.8555802 | -1.7721334 | 1.8629344  |
| H | -6.2423779 | 3.7969632  | 1.1707629  | C  | -5.7983573 | -2.1052487 | 0.7619236  |
| H | -7.3191100 | 3.5271432  | 3.3664330  | C  | -3.8246354 | -0.9985908 | 1.3856651  |
| H | -5.8536185 | 4.5432452  | 3.5689239  | C  | -2.6562354 | -0.4004682 | 2.0172809  |
| H | -5.8421036 | 2.8251236  | 4.0796895  | C  | -4.0781503 | -0.8927152 | -0.0664646 |
| C | -1.9212431 | 3.6899214  | -1.3727486 | O  | -5.2180020 | -1.5101968 | -0.4181957 |
| C | -2.8059958 | 2.9932480  | -2.4172234 | O  | -3.3815382 | -0.3287569 | -0.9322529 |
| H | -2.3086388 | 3.0075092  | -3.4076789 | H  | -6.8168950 | -1.6776324 | 0.8967971  |
| H | -3.7865191 | 3.5005032  | -2.5346756 | H  | -5.0121148 | -2.0855753 | 2.9037784  |
| H | -2.9955576 | 1.9380906  | -2.1426930 | H  | -2.2714990 | -3.1035165 | -0.4429465 |
| C | -1.7847502 | 5.1919652  | -1.6917861 | H  | -2.7977895 | -0.2855033 | 3.1082682  |
| H | -0.9111707 | 3.2367214  | -1.4515982 | H  | -2.4224483 | 0.5870873  | 1.5707596  |
| H | -1.4124113 | 5.3412670  | -2.7265936 |    |            |            |            |
| H | -1.0802268 | 5.6960709  | -1.0013700 |    |            |            |            |
| H | -2.7675411 | 5.7011615  | -1.6039545 |    |            |            |            |
| H | 2.1762810  | -5.1487432 | -4.8958343 |    |            |            |            |
| H | 5.9506081  | -0.6425939 | -4.6201935 |    |            |            |            |
| H | 2.8715181  | -4.8829062 | 1.4872686  |    |            |            |            |

int1-8-b



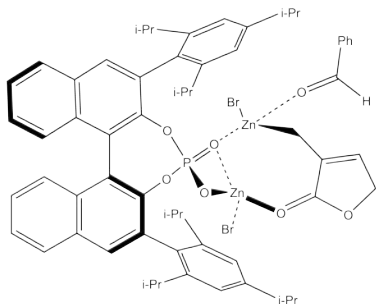

Energy(Hartree)= -11970.021049

|   |            |            |            |
|---|------------|------------|------------|
| C | 0.8037315  | 2.3888746  | 0.7436878  |
| C | 2.2002139  | 2.3763117  | 0.7742388  |
| C | 2.8809230  | 3.6503584  | 0.7713024  |
| C | 4.2958969  | 3.7657776  | 0.6227847  |
| C | 2.1050657  | 4.8622287  | 0.8831911  |
| C | 2.7755773  | 6.1216688  | 0.8898586  |
| C | 0.6875401  | 4.7795773  | 0.9924793  |
| H | 0.1089105  | 5.7017960  | 1.1565721  |
| C | 0.0149484  | 3.5662920  | 0.9124745  |
| C | 3.5946812  | -1.0069993 | -0.3884019 |
| C | 4.5938275  | -1.2220758 | 0.5515126  |
| H | 5.2745279  | -2.0773147 | 0.4256057  |
| C | 4.7532558  | -0.3751645 | 1.6864127  |
| C | 5.7157397  | -0.6684971 | 2.6972042  |
| C | 3.9263314  | 0.7989525  | 1.8253891  |
| C | 4.0703270  | 1.5975391  | 2.9976704  |
| C | 2.9611820  | 1.0959563  | 0.7960162  |
| C | 2.7707024  | 0.1413887  | -0.2006198 |
| O | 0.1043426  | 1.1840168  | 0.6321313  |
| O | 1.7642828  | 0.3460176  | -1.1519068 |
| P | 0.2023244  | 0.2658669  | -0.7187709 |
| O | -0.5937978 | 0.7531959  | -1.9494574 |
| O | -0.3565567 | -1.1224227 | -0.2814380 |
| C | 4.1539687  | 6.1968400  | 0.7631888  |
| C | 4.9156158  | 5.0074325  | 0.6161936  |
| H | 2.1710952  | 7.0372058  | 0.9868145  |
| H | 4.6578099  | 7.1753557  | 0.7635912  |
| H | 4.8964590  | 2.8541323  | 0.4992767  |
| H | 6.0073433  | 5.0693368  | 0.4907705  |
| C | 5.0041151  | 1.2731503  | 3.9714571  |
| C | 5.8437101  | 0.1387238  | 3.8170759  |
| H | 3.4148495  | 2.4690346  | 3.1344948  |
| H | 5.0872861  | 1.8957789  | 4.8752687  |
| H | 6.5832203  | -0.1065209 | 4.5944900  |
| H | 6.3452319  | -1.5641883 | 2.5777956  |
| C | -2.3805208 | 3.4882295  | 0.0558034  |
| C | -1.4623236 | 3.4555909  | 1.1409488  |
| C | -3.7520899 | 3.3747196  | 0.3365592  |
| C | -1.9289756 | 3.3090645  | 2.4747493  |
| C | -3.3160960 | 3.1914402  | 2.6977204  |
| C | -4.2455202 | 3.2256541  | 1.6465972  |
| H | -4.4722897 | 3.4105112  | -0.4957592 |
| C | -0.9625834 | 3.2466165  | 3.6587820  |
| H | -3.6714861 | 3.0726704  | 3.7311531  |
| C | -0.7137440 | 1.7953674  | 4.1102027  |
| H | -1.6481749 | 1.3331739  | 4.4917557  |
| H | 0.0373539  | 1.7590870  | 4.9257810  |
| H | -0.3345322 | 1.1564427  | 3.2892485  |
| C | -1.4086303 | 4.1279853  | 4.8372300  |
| H | 0.0108509  | 3.6474966  | 3.3099378  |
| H | -2.3357567 | 3.7477931  | 5.3149003  |
| H | -1.5987885 | 5.1724598  | 4.5167692  |
| H | -0.6253213 | 4.1453306  | 5.6223706  |
| C | -5.7514329 | 3.0896848  | 1.8620028  |
| C | -6.2405961 | 1.6893130  | 1.4410767  |
| H | -7.3460468 | 1.6154546  | 1.5124429  |

|    |            |            |            |
|----|------------|------------|------------|
| H  | -5.7981851 | 0.9122497  | 2.0980250  |
| H  | -5.9488057 | 1.4526094  | 0.3977714  |
| C  | -6.2148719 | 3.4190259  | 3.2861928  |
| H  | -6.2306124 | 3.8243766  | 1.1756607  |
| H  | -7.3221447 | 3.4170928  | 3.3449956  |
| H  | -5.8558488 | 4.4146817  | 3.6155500  |
| H  | -5.8492104 | 2.6683606  | 4.0180102  |
| C  | -1.8979285 | 3.7037273  | -1.3765950 |
| C  | -2.7780252 | 3.0178036  | -2.4320207 |
| H  | -2.2712106 | 3.0319559  | -3.4174356 |
| H  | -3.7537168 | 3.5325853  | -2.5573477 |
| H  | -2.9782783 | 1.9630153  | -2.1642200 |
| C  | -1.7566586 | 5.2076606  | -1.6837244 |
| H  | -0.8888726 | 3.2483132  | -1.4540256 |
| H  | -1.3816049 | 5.3639702  | -2.7164074 |
| H  | -1.0518123 | 5.7044757  | -0.9887450 |
| H  | -2.7378074 | 5.7193993  | -1.5938287 |
| H  | 2.1546264  | -5.1760664 | -4.8499974 |
| H  | 5.8963041  | -0.6370739 | -4.6360995 |
| H  | 2.9460241  | -4.9018704 | 1.5030687  |
| C  | 2.5108650  | -4.1783841 | -5.1900474 |
| H  | 4.1528865  | 1.9436069  | -3.9214788 |
| H  | 1.0176576  | -4.0949283 | -6.8034695 |
| H  | 0.4884530  | -4.5274042 | 0.7893928  |
| C  | 2.8759447  | -3.3928479 | -3.9370668 |
| C  | 5.9221753  | -0.2050318 | -3.6138484 |
| C  | 1.3415821  | -3.4959000 | -5.9266413 |
| H  | 1.6409383  | -2.4919504 | -6.2948008 |
| C  | 3.5394294  | -2.1564560 | -4.0125112 |
| C  | 3.2881031  | -4.5767460 | 0.4989383  |
| H  | 4.5475770  | -4.9043537 | -5.5956536 |
| C  | 2.4880650  | -3.8527651 | -2.6683140 |
| C  | 3.7095870  | -4.4073378 | -6.1247593 |
| H  | 3.4202654  | -5.0427118 | -6.9872001 |
| H  | 1.9589911  | -4.8161010 | -2.6001119 |
| C  | 3.6647832  | 0.9478279  | -3.8767519 |
| H  | 6.4424191  | 0.7732255  | -3.6785087 |
| H  | 6.5341677  | -0.8796888 | -2.9814859 |
| C  | 3.8010682  | -1.3786027 | -2.8709282 |
| C  | 0.8828350  | -4.3522901 | -0.2308461 |
| C  | 2.7204252  | -3.1136172 | -1.4936829 |
| H  | 4.2674410  | -4.0750116 | 0.6237436  |
| H  | 3.4526397  | -5.4815051 | -0.1239299 |
| C  | 4.5053221  | -0.0326362 | -3.0374597 |
| C  | 3.3865486  | -1.8631269 | -1.5999412 |
| C  | 2.2440206  | -3.6472919 | -0.1471987 |
| H  | 2.6536962  | 1.0762504  | -3.4433239 |
| H  | 0.1519440  | -3.7322959 | -0.7862703 |
| H  | 3.5449487  | 0.5875712  | -4.9199442 |
| H  | 0.4687653  | -3.3570081 | -5.2568427 |
| H  | 0.9497721  | -5.3383098 | -0.7369875 |
| H  | 4.0931050  | -3.4509411 | -6.5375901 |
| H  | 4.6225229  | 0.4150796  | -2.0291311 |
| H  | 2.1118115  | -2.7780321 | 0.5305927  |
| H  | 3.8492229  | -1.7709504 | -4.9970147 |
| C  | -4.7381122 | -6.4856529 | 1.4421856  |
| C  | -3.7325504 | -5.5204138 | 1.5337824  |
| C  | -3.4324415 | -4.7138451 | 0.4104431  |
| C  | -4.1416639 | -4.8849276 | -0.8016483 |
| C  | -5.1497415 | -5.8558859 | -0.8845473 |
| C  | -5.4465005 | -6.6533467 | 0.2340261  |
| H  | -4.9774142 | -7.1180354 | 2.3106430  |
| H  | -3.1625075 | -5.3633212 | 2.4619891  |
| C  | -2.4098679 | -3.6691148 | 0.4827419  |
| H  | -3.8909406 | -4.2503313 | -1.6685022 |
| H  | -5.7035424 | -5.9945108 | -1.8252064 |
| H  | -6.2366934 | -7.4171779 | 0.1669306  |
| O  | -1.7439637 | -3.4088325 | 1.4950172  |
| Zn | -1.8015102 | -0.8555390 | -2.0112295 |
| Br | -2.1514424 | -2.6216884 | -3.4369109 |
| H  | -5.8850584 | -3.1730347 | 0.5290768  |

|    |            |            |            |
|----|------------|------------|------------|
| Br | 1.1300658  | -1.6182215 | 2.9709205  |
| Zn | -0.8786371 | -1.4637886 | 1.7846359  |
| C  | -4.8294099 | -1.7909098 | 1.8750604  |
| C  | -5.7707126 | -2.0893935 | 0.7611065  |
| C  | -3.7968402 | -1.0033471 | 1.4236460  |
| C  | -2.6267958 | -0.4295309 | 2.0668390  |
| C  | -4.0465410 | -0.8557828 | -0.0277839 |
| O  | -5.1874865 | -1.4627455 | -0.3989168 |
| O  | -3.3438771 | -0.2721074 | -0.8716300 |
| H  | -6.7883692 | -1.6607550 | 0.9047621  |
| H  | -4.9851163 | -2.1369124 | 2.9055149  |
| H  | -2.2463486 | -3.0964992 | -0.4674137 |
| H  | -2.7528320 | -0.3543740 | 3.1629522  |
| H  | -2.3886500 | 0.5692403  | 1.6488155  |

### 7.2.4.9 to 15l-ma

#### TS-8-l; woelfling data

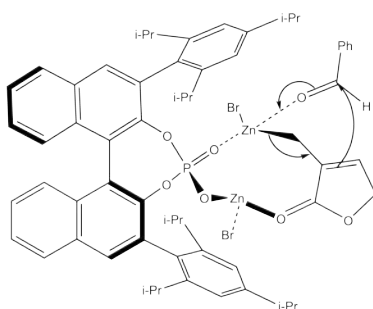

Energy(Hartree) = -11969.979977

|   |           |           |           |
|---|-----------|-----------|-----------|
| C | 0.558293  | 2.533275  | 2.061000  |
| C | 1.951721  | 2.531417  | 2.036509  |
| C | 2.619978  | 3.810235  | 2.020976  |
| C | 4.024001  | 3.946372  | 1.814394  |
| C | 1.834497  | 5.005946  | 2.215292  |
| C | 2.496148  | 6.269078  | 2.259354  |
| C | 0.414998  | 4.916052  | 2.313154  |
| H | -0.163664 | 5.838734  | 2.470363  |
| C | -0.254727 | 3.708635  | 2.160215  |
| C | 3.180934  | -0.987176 | 1.047240  |
| C | 4.232593  | -1.149786 | 1.941526  |
| H | 4.863232  | -2.048310 | 1.864916  |
| C | 4.492723  | -0.214169 | 2.980529  |
| C | 5.500648  | -0.458038 | 3.960478  |
| C | 3.697806  | 0.985315  | 3.066599  |
| C | 3.907520  | 1.853691  | 4.179902  |
| C | 2.695916  | 1.240158  | 2.058285  |
| C | 2.420963  | 0.221612  | 1.135375  |
| O | -0.096802 | 1.306618  | 2.079403  |
| O | 1.389519  | 0.393914  | 0.208384  |
| P | -0.162997 | 0.370935  | 0.751718  |
| O | -1.046940 | 0.951123  | -0.341888 |
| O | -0.489474 | -1.037598 | 1.307608  |
| C | 3.867953  | 6.364681  | 2.080763  |
| C | 4.633259  | 5.193254  | 1.841047  |
| H | 1.887739  | 7.173355  | 2.417925  |
| H | 4.361957  | 7.347675  | 2.107143  |
| H | 4.624816  | 3.045911  | 1.624474  |
| H | 5.717568  | 5.272914  | 1.670411  |
| C | 4.880417  | 1.577220  | 5.129363  |
| C | 5.697662  | 0.421762  | 5.013123  |
| H | 3.274990  | 2.744753  | 4.290323  |
| H | 5.013127  | 2.258111  | 5.983716  |
| H | 6.471211  | 0.217985  | 5.768831  |

|   |           |           |           |
|---|-----------|-----------|-----------|
| H | 6.106196  | -1.373808 | 3.873244  |
| C | -2.331248 | 4.008614  | 0.771649  |
| C | -1.726650 | 3.536034  | 1.973042  |
| C | -3.606405 | 3.515775  | 0.435895  |
| C | -2.459472 | 2.713168  | 2.871162  |
| C | -3.737382 | 2.268157  | 2.496494  |
| C | -4.308347 | 2.617521  | 1.258890  |
| H | -4.062145 | 3.816973  | -0.519710 |
| C | -1.902357 | 2.371296  | 4.251686  |
| H | -4.292937 | 1.609325  | 3.181602  |
| H | 3.350296  | -6.644643 | -4.083372 |
| H | -3.075970 | 0.561257  | 4.722545  |
| H | -1.517746 | 0.683327  | 5.586488  |
| H | -1.552059 | 0.244609  | 3.849679  |
| C | -2.565869 | 3.266227  | 5.317149  |
| H | -0.822248 | 2.627426  | 4.248310  |
| H | -3.657704 | 3.073401  | 5.371679  |
| H | -2.427138 | 4.341365  | 5.084063  |
| H | -2.135127 | 3.070555  | 6.321365  |
| C | -5.633626 | 2.015792  | 0.807317  |
| C | -5.444295 | 0.541911  | 0.394371  |
| H | -6.405179 | 0.098469  | 0.057777  |
| H | -5.075031 | -0.068016 | 1.246603  |
| H | -4.718427 | 0.444627  | -0.437687 |
| C | -6.743434 | 2.162930  | 1.862119  |
| H | -5.952157 | 2.577494  | -0.098326 |
| H | -7.712849 | 1.794846  | 1.467289  |
| H | -6.874602 | 3.221053  | 2.166528  |
| H | -6.518693 | 1.574176  | 2.775710  |
| C | -1.609510 | 4.994379  | -0.152119 |
| C | -0.680414 | 4.290408  | -1.155574 |
| H | -0.100456 | 5.037229  | -1.736888 |
| H | -1.262923 | 3.675388  | -1.867901 |
| H | 0.037284  | 3.614280  | -0.650430 |
| C | -2.566494 | 5.963602  | -0.863745 |
| H | -0.965871 | 5.622237  | 0.494666  |
| H | -1.986012 | 6.740091  | -1.402865 |
| H | -3.236406 | 6.475693  | -0.142689 |
| H | -3.199364 | 5.452670  | -1.617642 |
| H | 1.601207  | -5.981401 | -2.415779 |
| H | 5.262195  | -1.410636 | -3.260905 |
| H | 2.704379  | -4.618087 | 3.642159  |
| C | 2.183107  | -5.183470 | -2.928598 |
| H | 3.440590  | 1.189593  | -3.119529 |
| H | 1.149612  | -5.551098 | -4.828811 |
| H | 0.196250  | -4.169967 | 3.075988  |
| C | 2.406577  | -4.076148 | -1.904695 |
| C | 5.276950  | -0.770483 | -2.353976 |
| C | 1.355104  | -4.709853 | -4.134917 |
| H | 1.888983  | -3.929049 | -4.715610 |
| C | 2.967998  | -2.841699 | -2.274317 |
| C | 2.987887  | -4.435756 | 2.584885  |
| H | 4.099885  | -6.183125 | -2.517031 |
| C | 2.085414  | -4.269733 | -0.550796 |
| C | 3.519195  | -5.802036 | -3.380682 |
| C | 2.976200  | 0.223908  | -2.832292 |
| H | 1.642895  | -5.233067 | -0.248946 |
| C | -2.021296 | 0.886411  | 4.619066  |
| H | 5.768954  | 0.185503  | -2.628127 |
| H | 5.910447  | -1.277546 | -1.598028 |
| C | 3.210013  | -1.818784 | -1.340090 |
| C | 0.543341  | -4.203584 | 2.022961  |
| C | 2.305773  | -3.279287 | 0.426481  |
| H | 3.990687  | -3.966585 | 2.578337  |
| H | 3.076272  | -5.422050 | 2.082778  |
| C | 3.857090  | -0.518923 | -1.812309 |
| C | 2.878583  | -2.039919 | 0.024596  |
| C | 1.932014  | -3.560907 | 1.882571  |
| H | 1.975535  | 0.441313  | -2.408631 |
| H | -0.194403 | -3.684443 | 1.385769  |
| H | 2.839758  | -0.368290 | -3.761623 |

|    |           |           |           |
|----|-----------|-----------|-----------|
| H  | 0.386058  | -4.282872 | -3.810406 |
| H  | 0.534990  | -5.268779 | 1.711780  |
| H  | 4.148112  | -5.049918 | -3.901563 |
| H  | 3.964991  | 0.143314  | -0.929608 |
| H  | 1.892732  | -2.582626 | 2.403589  |
| H  | 3.237220  | -2.667317 | -3.328632 |
| Zn | -1.733799 | 0.161763  | -2.042443 |
| Br | -2.447806 | 1.993256  | -3.407417 |
| C  | -3.381864 | -1.766017 | -7.388618 |
| C  | -3.824374 | -1.730238 | -3.115811 |
| C  | -2.485574 | -0.997066 | -6.624681 |
| C  | -4.541990 | -2.416482 | -5.360211 |
| C  | -3.649597 | -1.644742 | -4.580582 |
| C  | -4.420132 | -2.468440 | -6.752588 |
| C  | -2.618952 | -0.922657 | -5.232386 |
| O  | -3.438303 | -0.931895 | -2.236553 |
| H  | -3.270025 | -1.820665 | -8.482467 |
| H  | -5.344543 | -2.973917 | -4.850823 |
| H  | -1.675567 | -0.441442 | -7.122304 |
| H  | -5.134030 | -3.061130 | -7.343247 |
| H  | -1.916157 | -0.305710 | -4.656051 |
| H  | -3.940933 | -4.690770 | -3.249167 |
| Br | -3.698789 | -2.168410 | 3.242874  |
| Zn | -2.076094 | -2.022871 | 1.658627  |
| C  | -2.066344 | -3.518546 | -3.171899 |
| C  | -2.907944 | -4.696897 | -2.835561 |
| C  | -1.536385 | -2.965809 | -2.019664 |
| C  | -0.663179 | -1.841152 | -1.850849 |
| C  | -2.245914 | -3.673827 | -0.920994 |
| O  | -3.010966 | -4.670436 | -1.398380 |
| O  | -2.229603 | -3.489289 | 0.306836  |
| H  | -2.429493 | -5.652943 | -3.138926 |
| H  | 0.056863  | -1.720181 | -2.680584 |
| H  | -0.145041 | -1.834261 | -0.874824 |
| H  | -1.754171 | -3.274523 | -4.190718 |
| H  | -4.517180 | -2.542632 | -2.785155 |

|   |            |            |            |
|---|------------|------------|------------|
| H | -0.4819215 | 5.0865971  | 87.6713020 |
| H | -0.7220521 | 8.2564528  | 85.6394917 |
| C | 0.1004124  | 0.9429652  | 89.2186440 |
| C | 0.8582977  | -0.1559957 | 89.6425513 |
| C | 0.2912297  | -1.0098400 | 90.6580090 |
| C | 1.0309991  | -2.0517609 | 91.2943984 |
| C | -1.0712296 | -0.7836714 | 91.0796575 |
| C | -1.6518535 | -1.6490726 | 92.0556178 |
| C | -1.7976283 | 0.3256115  | 90.5590151 |
| H | -2.8293704 | 0.4900576  | 90.9044235 |
| C | -1.2214184 | 1.2338440  | 89.6776576 |
| C | 4.4129790  | 0.5877437  | 88.3814200 |
| C | 4.8119766  | -0.6621618 | 87.9221031 |
| H | 5.8094982  | -0.7748374 | 87.4706581 |
| C | 3.9342574  | -1.7843686 | 87.9354604 |
| C | 4.3365162  | -3.0351288 | 87.3766714 |
| C | 2.5901301  | -1.6377212 | 88.4444939 |
| C | 1.6889606  | -2.7340164 | 88.2877655 |
| C | 2.2085957  | -0.3837533 | 89.0517080 |
| C | 3.1295587  | 0.6685881  | 89.0027085 |
| O | 0.6434487  | 1.8153262  | 88.2758260 |
| O | 2.7972740  | 1.8841735  | 89.6012237 |
| P | 1.7577694  | 2.8833114  | 88.8351823 |
| O | 1.1715295  | 3.7809060  | 89.9483487 |
| O | 2.3445580  | 3.5632130  | 87.5930977 |
| C | -0.9144001 | -2.6738107 | 92.6293232 |
| C | 0.4433698  | -2.8626017 | 92.2558596 |
| H | -2.6961149 | -1.4732050 | 92.3583593 |
| H | -1.3718978 | -3.3292286 | 93.3860221 |
| H | 2.0845696  | -2.2033672 | 91.0214584 |
| H | 1.0372864  | -3.6550044 | 92.7363967 |
| C | 2.1060854  | -3.9310463 | 87.7211184 |
| C | 3.4458546  | -4.0934658 | 87.2782217 |
| H | 0.6461029  | -2.6231440 | 88.6146845 |
| H | 1.3889492  | -4.7586552 | 87.6093861 |
| H | 3.7676665  | -5.0501037 | 86.8391799 |
| H | 5.3682488  | -3.1348950 | 87.0044198 |
| C | -2.1480256 | 3.5258517  | 90.2258876 |
| C | -1.9079660 | 2.4992589  | 89.2611979 |
| C | -2.7886189 | 4.7067149  | 89.8090118 |
| C | -2.2956337 | 2.7011749  | 87.9086266 |
| C | -2.9472511 | 3.8990889  | 87.5509619 |
| C | -3.2146047 | 4.9136561  | 88.4834813 |
| H | -2.9713216 | 5.5010539  | 90.5506195 |
| C | -2.0690899 | 1.6489699  | 86.8250639 |
| H | -3.2558566 | 4.0315980  | 86.5037729 |
| C | -1.2258901 | 2.1977280  | 85.6595238 |
| H | -1.7558773 | 3.0085094  | 85.1170960 |
| H | -1.0095466 | 1.3949372  | 84.9249360 |
| H | -0.2584899 | 2.5966217  | 86.0224865 |
| C | -3.4072599 | 1.0656538  | 86.3334412 |
| H | -1.5011921 | 0.8113159  | 87.2764749 |
| H | -4.0361048 | 1.8428162  | 85.8506093 |
| H | -3.9902379 | 0.6345621  | 87.1725712 |
| H | -3.2337147 | 0.2631365  | 85.5870059 |
| C | -3.9839285 | 6.1839561  | 88.1303621 |
| C | -4.0133349 | 6.5085217  | 86.6317325 |
| H | -4.4842589 | 7.4978886  | 86.4595420 |
| H | -4.6102128 | 5.7638930  | 86.0651936 |
| H | -2.9953090 | 6.5301220  | 86.1936155 |
| C | -5.4165234 | 6.1119602  | 88.6986816 |
| H | -3.4707886 | 7.0239784  | 88.6523926 |
| H | -5.9678185 | 7.0560246  | 88.5080681 |
| H | -5.4118291 | 5.9311806  | 89.7920173 |
| H | -5.9803017 | 5.2824999  | 88.2227631 |
| C | -1.7813925 | 3.3748550  | 91.7037721 |
| C | -1.0219857 | 4.5824958  | 92.2782148 |
| H | -0.7798509 | 4.4069670  | 93.3461754 |
| H | -1.6073788 | 5.5224693  | 92.2213796 |
| H | -0.0645450 | 4.7352326  | 91.7455782 |
| C | -3.0452369 | 3.0891825  | 92.5403549 |

## 7.3 Complexes 13

### 13d-ma; COSMO

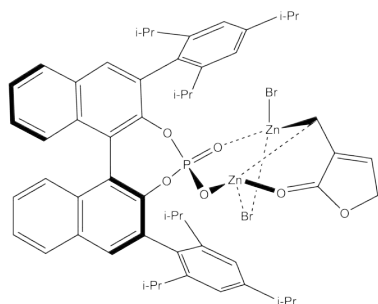

Energy (Hartree)= -11625.10064996

|    |            |            |            |
|----|------------|------------|------------|
| Zn | 1.0115538  | 5.6711736  | 89.4376570 |
| Br | 3.3295690  | 6.4730539  | 89.5533698 |
| H  | -0.8891327 | 10.2812114 | 87.4934327 |
| Br | 3.3767881  | 6.4631744  | 85.3417603 |
| H  | 0.4892130  | 5.6893725  | 86.3352500 |
| Zn | 2.5361342  | 5.5456524  | 87.3041254 |
| C  | -0.7984686 | 8.2181062  | 86.7344107 |
| C  | -1.4157972 | 9.3041488  | 87.5537813 |
| C  | -0.3944529 | 7.2103413  | 87.5579080 |
| C  | 0.2426013  | 5.8911447  | 87.3975971 |
| C  | -0.6875894 | 7.6770712  | 88.9255463 |
| O  | -1.3213416 | 8.8503802  | 88.9286449 |
| O  | -0.3602323 | 7.0966077  | 89.9843908 |
| H  | -2.4885013 | 9.4770378  | 87.3167412 |

|   |            |           |            |   |            |            |            |
|---|------------|-----------|------------|---|------------|------------|------------|
| H | -1.1077309 | 2.4997883 | 91.7956948 | H | -2.3834961 | 9.5415187  | 87.2941746 |
| H | -2.7813904 | 2.9070731 | 93.6026329 | H | -0.4753925 | 5.1098365  | 87.6274308 |
| H | -3.5963456 | 2.2027017 | 92.1674873 | H | -0.5615921 | 8.3214986  | 85.6686837 |
| H | -3.7444077 | 3.9510681 | 92.5065788 | C | 0.1019021  | 0.9273518  | 89.2343831 |
| H | 7.3007357  | 5.6650536 | 86.1265168 | C | 0.8568084  | -0.1720894 | 89.6630000 |
| H | 7.8580258  | 2.5030782 | 91.0800544 | C | 0.2805063  | -1.0284950 | 90.6706786 |
| H | 5.2143102  | 0.3143672 | 83.9125936 | C | 1.0153198  | -2.0711826 | 91.3109541 |
| C | 7.3270334  | 5.5451909 | 87.2317960 | C | -1.0858893 | -0.8049430 | 91.0802476 |
| H | 5.0527800  | 2.7401082 | 92.5931277 | C | -1.6735487 | -1.6735275 | 92.0484461 |
| H | 7.1950090  | 7.7065848 | 87.5765446 | C | -1.8082556 | 0.3044891  | 90.5549733 |
| H | 3.2362111  | 1.9134474 | 83.9300234 | H | -2.8432036 | 0.4686745  | 90.8909354 |
| C | 6.5687520  | 4.2619882 | 87.5491654 | C | -1.2249641 | 1.2149868  | 89.6810223 |
| C | 7.1428951  | 1.6538287 | 91.0874879 | C | 4.4071137  | 0.5904970  | 88.4054207 |
| C | 6.6429233  | 6.7807039 | 87.8413596 | C | 4.8120245  | -0.6556221 | 87.9420027 |
| H | 6.6036135  | 6.7154056 | 88.9489372 | H | 5.8065251  | -0.7578696 | 87.4815284 |
| C | 6.4652062  | 3.7746130 | 88.8645683 | C | 3.9432728  | -1.7844917 | 87.9589667 |
| C | 5.6830153  | 0.8854904 | 84.7409795 | C | 4.3515728  | -3.0316836 | 87.3979319 |
| H | 9.3025214  | 4.5737769 | 87.1969136 | C | 2.5993224  | -1.6470284 | 88.4707674 |
| C | 5.9507252  | 3.5233090 | 86.5276141 | C | 1.7048862  | -2.7483006 | 88.3126156 |
| C | 8.8035101  | 5.4509589 | 87.6567846 | C | 2.2117452  | -0.3966590 | 89.0816031 |
| H | 9.3591708  | 6.3625734 | 87.3536433 | C | 3.1281839  | 0.6598298  | 89.0377375 |
| H | 6.0019187  | 3.9102553 | 85.4977004 | O | 0.6522526  | 1.8043587  | 88.3009757 |
| C | 5.1371054  | 3.1480974 | 91.5645158 | O | 2.7921908  | 1.8690578  | 89.6459846 |
| H | 7.1034265  | 1.2550771 | 92.1226550 | P | 1.7582647  | 2.8723761  | 88.8793508 |
| H | 7.5555851  | 0.8625107 | 90.4289944 | O | 1.1596288  | 3.7690713  | 89.9842064 |
| C | 5.7867993  | 2.5813776 | 89.1691886 | O | 2.3561176  | 3.5554877  | 87.6429367 |
| C | 3.7340618  | 2.5085246 | 84.7236327 | C | -0.9407456 | -2.6987718 | 92.6259236 |
| C | 5.2578474  | 2.3231345 | 86.7741196 | C | 0.4199585  | -2.8852079 | 92.2642531 |
| H | 6.2894382  | 0.1796445 | 85.3439338 | H | -2.7206009 | -1.4993344 | 92.3424153 |
| H | 6.3809888  | 1.6231407 | 84.2920446 | H | -1.4045708 | -3.3564386 | 93.3767214 |
| C | 5.7449173  | 2.0985124 | 90.6173921 | H | 2.0711387  | -2.2200069 | 91.0456329 |
| C | 5.1911724  | 1.8386463 | 88.1133895 | H | 1.0103583  | -3.6783613 | 92.7477392 |
| C | 4.6124296  | 1.5929849 | 85.5942529 | C | 2.1286735  | -3.9417872 | 87.7444321 |
| H | 4.1267718  | 3.4525053 | 91.2288618 | C | 3.4681595  | -4.0954133 | 87.2996980 |
| H | 2.9542821  | 3.0035959 | 85.3320851 | H | 0.6619929  | -2.6436047 | 88.6410182 |
| H | 5.7646753  | 4.0618126 | 91.6202703 | H | 1.4163259  | -4.7734610 | 87.6326935 |
| H | 5.6040107  | 6.8801740 | 87.4696380 | H | 3.7955291  | -5.0492979 | 86.8589183 |
| H | 4.3217030  | 3.3042277 | 84.2219350 | H | 5.3830647  | -3.1239687 | 87.0231492 |
| H | 8.9009909  | 5.3537452 | 88.7586061 | C | -2.1563091 | 3.5063841  | 90.2225332 |
| H | 5.0920622  | 1.2022547 | 90.6550847 | C | -1.9069649 | 2.4810206  | 89.2594400 |
| H | 3.9445576  | 0.8101067 | 86.0062638 | C | -2.7849149 | 4.6090983  | 89.7984935 |
| H | 6.9314390  | 4.3421770 | 89.6856821 | C | -2.2759578 | 2.6863100  | 87.9022004 |

### 13d-ma

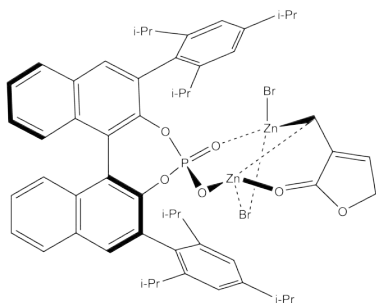

Energy (Hartree) = -11625.08953435

|    |            |            |            |
|----|------------|------------|------------|
| Zn | 1.0053004  | 5.6538401  | 89.4309026 |
| Br | 3.3277909  | 6.4430925  | 89.6414624 |
| H  | -0.7814333 | 10.3173914 | 87.5558929 |
| Br | 3.4218278  | 6.4700514  | 85.4036419 |
| H  | 0.6206820  | 5.7311981  | 86.3858893 |
| Zn | 2.6784274  | 5.5138500  | 87.3751821 |
| C  | -0.6897894 | 8.2653967  | 86.7579296 |
| C  | -1.3243099 | 9.3467330  | 87.5741505 |
| C  | -0.3428008 | 7.2327768  | 87.5765501 |
| C  | 0.2781057  | 5.9083536  | 87.4247087 |
| C  | -0.6778170 | 7.6828223  | 88.9441344 |
| O  | -1.2964769 | 8.8683400  | 88.9408094 |
| O  | -0.3890916 | 7.0855985  | 90.0002194 |

|   |            |            |            |
|---|------------|------------|------------|
| H | -2.3834961 | 9.5415187  | 87.2941746 |
| H | -0.4753925 | 5.1098365  | 87.6274308 |
| H | -0.5615921 | 8.3214986  | 85.6686837 |
| C | 0.1019021  | 0.9273518  | 89.2343831 |
| C | 0.8568084  | -0.1720894 | 89.6630000 |
| C | 0.2805063  | -1.0284950 | 90.6706786 |
| C | 1.0153198  | -2.0711826 | 91.3109541 |
| C | -1.0858893 | -0.8049430 | 91.0802476 |
| C | -1.6735487 | -1.6735275 | 92.0484461 |
| C | -1.8082556 | 0.3044891  | 90.5549733 |
| H | -2.8432036 | 0.4686745  | 90.8909354 |
| C | -1.2249641 | 1.2149868  | 89.6810223 |
| C | 4.4071137  | 0.5904970  | 88.4054207 |
| C | 4.8120245  | -0.6556221 | 87.9420027 |
| H | 5.8065251  | -0.7578696 | 87.4815284 |
| C | 3.9432728  | -1.7844917 | 87.9589667 |
| C | 4.3515728  | -3.0316836 | 87.3979319 |
| C | 2.5993224  | -1.6470284 | 88.4707674 |
| C | 1.7048862  | -2.7483006 | 88.3126156 |
| C | 2.2117452  | -0.3966590 | 89.0816031 |
| C | 3.1281839  | 0.6598298  | 89.0377375 |
| O | 0.6522526  | 1.8043587  | 88.3009757 |
| O | 2.7921908  | 1.8690578  | 89.6459846 |
| P | 1.7582647  | 2.8723761  | 88.8793508 |
| O | 1.1596288  | 3.7690713  | 89.9842064 |
| O | 2.3561176  | 3.5554877  | 87.6429367 |
| C | -0.9407456 | -2.6987718 | 92.6259236 |
| C | 0.4199585  | -2.8852079 | 92.2642531 |
| H | -2.7206009 | -1.4993344 | 92.3424153 |
| H | -1.4045708 | -3.3564386 | 93.3767214 |
| H | 2.0711387  | -2.2200069 | 91.0456329 |
| H | 1.0103583  | -3.6783613 | 92.7477392 |
| C | 2.1286735  | -3.9417872 | 87.7444321 |
| C | 3.4681595  | -4.0954133 | 87.2996980 |
| H | 0.6619929  | -2.6436047 | 88.6410182 |
| H | 1.4163259  | -4.7734610 | 87.6326935 |
| H | 3.7955291  | -5.0492979 | 86.8589183 |
| H | 5.3830647  | -3.1239687 | 87.0231492 |
| C | -2.1563091 | 3.5063841  | 90.2225332 |
| C | -1.9069649 | 2.4810206  | 89.2594400 |
| C | -2.7849149 | 4.6090983  | 89.7984935 |
| C | -2.2759578 | 2.6863100  | 87.9022004 |
| C | -2.9161238 | 3.8878530  | 87.5375589 |
| C | -3.1897004 | 4.9026595  | 88.4676991 |
| H | -2.9720365 | 5.4856913  | 90.5385447 |
| C | -2.0405506 | 1.6338743  | 86.8207235 |
| H | -3.2097778 | 4.0231548  | 86.4863993 |
| C | -1.1847593 | 2.1796393  | 85.6631880 |
| H | -1.7082753 | 2.9885879  | 85.1117756 |
| H | -0.9597839 | 1.3754647  | 84.9329025 |
| H | -0.2213014 | 2.5796905  | 86.0347680 |
| C | -3.3752676 | 1.0529795  | 86.3173741 |
| H | -1.4787189 | 0.7954540  | 87.2781907 |
| H | -3.9990861 | 1.8310673  | 85.8296550 |
| H | -3.9666602 | 0.6231142  | 87.1509942 |
| H | -3.1975097 | 0.2505368  | 85.5719307 |
| C | -3.9457287 | 6.1783711  | 88.1056828 |
| C | -3.9261885 | 6.5211921  | 86.6107517 |
| H | -4.3907655 | 7.5130478  | 86.4344812 |
| H | -4.5060839 | 5.7855091  | 86.0157405 |
| H | -2.8943927 | 6.5457873  | 86.2064642 |
| C | -5.3955483 | 6.1015514  | 88.6271347 |
| H | -3.4475359 | 7.0117198  | 88.6525465 |
| H | -5.9416568 | 7.0477109  | 88.4315512 |
| H | -5.4252085 | 5.9060894  | 89.7174146 |
| H | -5.9441428 | 5.2779074  | 88.1245655 |
| C | -1.8111565 | 3.3519301  | 91.7051958 |
| C | -1.0458215 | 4.5510026  | 92.2898364 |
| H | -0.8281207 | 4.3765418  | 93.3632222 |
| H | -1.6150823 | 5.4998329  | 92.2180963 |
| H | -0.0761121 | 4.6856266  | 91.7756121 |

|   |            |           |            |    |            |            |            |
|---|------------|-----------|------------|----|------------|------------|------------|
| C | -3.0896564 | 3.0782807 | 92.5230559 | Zn | 2.6500220  | 4.9054746  | 86.3618272 |
| H | -1.1479686 | 2.4699672 | 91.8060565 | Br | 0.3393130  | 5.9118937  | 86.4035398 |
| H | -2.8437423 | 2.8917877 | 93.5888250 | C  | -0.1146959 | 0.8224577  | 88.9447067 |
| H | -3.6450870 | 2.1984776 | 92.1407949 | C  | 0.6564896  | -0.2570848 | 89.3898679 |
| H | -3.7803420 | 3.9465537 | 92.4811698 | C  | 0.0833974  | -1.1225981 | 90.3966371 |
| H | 7.1006934  | 5.7507750 | 86.1051120 | C  | 0.8223707  | -2.1512101 | 91.0560050 |
| H | 7.8781855  | 2.5534595 | 91.0301229 | C  | -1.2921950 | -0.9200285 | 90.7883327 |
| H | 5.1482945  | 0.3180583 | 83.9282571 | C  | -1.8859421 | -1.8021177 | 91.7410213 |
| C | 7.2241986  | 5.5889067 | 87.1981914 | C  | -2.0085072 | 0.2066053  | 90.2917430 |
| H | 5.1068317  | 2.7413196 | 92.6088127 | H  | -3.0291906 | 0.3906312  | 90.6607911 |
| H | 7.1814468  | 7.7361835 | 87.6297729 | C  | -1.4206093 | 1.1303971  | 89.4358475 |
| H | 3.1442513  | 1.8834087 | 83.9657055 | C  | 4.3270315  | 0.5579745  | 88.5840327 |
| C | 6.4791531  | 4.3027209 | 87.5343700 | C  | 4.8123211  | -0.6993919 | 88.2395579 |
| C | 7.1765167  | 1.6934277 | 91.0508609 | H  | 5.8826917  | -0.8193221 | 88.0127240 |
| C | 6.6285933  | 6.8151804 | 87.9084591 | C  | 3.9538640  | -1.8275172 | 88.1042100 |
| H | 6.6803535  | 6.7135961 | 89.0127181 | C  | 4.4547872  | -3.0828880 | 87.6438020 |
| C | 6.4116974  | 3.8124186 | 88.8509626 | C  | 2.5448630  | -1.6909600 | 88.3870024 |
| C | 5.6173662  | 0.8998811 | 84.7488417 | C  | 1.6921744  | -2.8045704 | 88.1211650 |
| H | 9.1646120  | 4.5793040 | 86.9468748 | C  | 2.0517247  | -0.4327567 | 88.8944571 |
| C | 5.8584471  | 3.5505140 | 86.5241748 | C  | 2.9410163  | 0.6504221  | 88.9237604 |
| C | 8.7303133  | 5.4460063 | 87.4850943 | O  | 0.3972351  | 1.6544313  | 87.9515208 |
| H | 9.2804867  | 6.3580031 | 87.1731266 | O  | 2.4880600  | 1.8937085  | 89.3523871 |
| H | 5.8823985  | 3.9390180 | 85.4941329 | P  | 1.5294222  | 2.7685253  | 88.3496456 |
| C | 5.1577569  | 3.1531540 | 91.5796369 | O  | 0.9803275  | 3.8945584  | 89.2313967 |
| H | 7.1678977  | 1.2903065 | 92.0849815 | O  | 2.2246289  | 3.1067446  | 87.0204508 |
| H | 7.5867028  | 0.9118979 | 90.3795501 | C  | -1.1497980 | -2.8201828 | 92.3279812 |
| C | 5.7646449  | 2.6051189 | 89.1675699 | C  | 0.2217420  | -2.9789636 | 91.9952945 |
| C | 3.6416607  | 2.4895321 | 84.7510237 | H  | -2.9396712 | -1.6411275 | 92.0181112 |
| C | 5.1969245  | 2.3355407 | 86.7825921 | H  | -1.6179004 | -3.4888673 | 93.0663913 |
| H | 6.2441198  | 0.2069168 | 85.3457486 | H  | 1.8871773  | -2.2828103 | 90.8216483 |
| H | 6.2972802  | 1.6474062 | 84.2891071 | H  | 0.8178118  | -3.7607489 | 92.4904654 |
| C | 5.7614343  | 2.1179051 | 90.6148199 | C  | 2.2072121  | -4.0051421 | 87.6514322 |
| C | 5.1649411  | 1.8506353 | 88.1230160 | C  | 3.6021999  | -4.1548816 | 87.4268961 |
| C | 4.5462431  | 1.5921198 | 85.6138067 | H  | 0.6103427  | -2.7000959 | 88.2834717 |
| H | 4.1334175  | 3.4387848 | 91.2716961 | H  | 1.5271838  | -4.8460822 | 87.4465457 |
| H | 2.8600615  | 2.9732024 | 85.3661898 | H  | 4.0001195  | -5.1148447 | 87.0640925 |
| H | 5.7681940  | 4.0789603 | 91.6233920 | H  | 5.5340904  | -3.1764284 | 87.4449857 |
| H | 5.5667638  | 6.9567321 | 87.6274372 | C  | -2.0596538 | 3.4173998  | 90.2396249 |
| H | 4.2073160  | 3.2943429 | 84.2391217 | C  | -2.0212664 | 2.4753139  | 89.1696819 |
| H | 8.9198968  | 5.2959346 | 88.5687770 | C  | -2.5784577 | 4.7012246  | 89.9851337 |
| H | 5.1235997  | 1.2112150 | 90.6626438 | C  | -2.4738049 | 2.8493176  | 87.8753576 |
| H | 3.8969739  | 0.7993296 | 86.0365911 | C  | -2.9862994 | 4.1444108  | 87.6794213 |
| H | 6.8833265  | 4.3884745 | 89.6629551 | C  | -3.0579474 | 5.0864899  | 88.7217793 |

### 13d-mi; COSMO

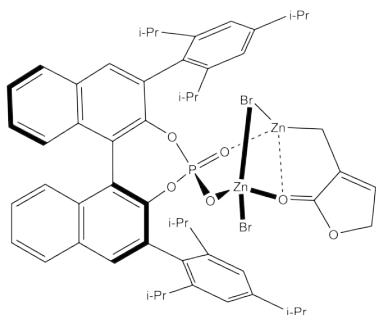

Energy (Hartree) = -11625.11129514

|    |            |           |            |   |            |           |            |
|----|------------|-----------|------------|---|------------|-----------|------------|
| Zn | 0.6727321  | 5.7989401 | 88.8812118 | C | -1.5736702 | 3.0930642 | 91.6544127 |
| Br | -0.0305957 | 7.5080770 | 90.2704416 | C | -0.5617240 | 4.1167370 | 92.1975605 |
| C  | 4.9066865  | 8.2906214 | 86.9844831 | H | -0.2111666 | 3.8063872 | 93.2037734 |
| C  | 4.3460666  | 7.0489026 | 86.9397103 | H | -0.9963881 | 5.1323303 | 92.2934401 |
| C  | 3.5957387  | 6.9173377 | 88.2089142 | H | 0.3191138  | 4.1916442 | 91.5320679 |
| O  | 3.7578798  | 7.9850141 | 88.9960125 | C | -2.7690017 | 2.9351859 | 92.6141832 |
| C  | 4.5717867  | 8.9456463 | 88.2840587 |   |            |           |            |
| O  | 2.8478861  | 5.9684383 | 88.5157940 |   |            |           |            |
| C  | 4.3029319  | 5.9482769 | 85.9469337 |   |            |           |            |
| H  | 5.4631780  | 9.1789086 | 88.9067868 |   |            |           |            |
| H  | 3.9725307  | 9.8766146 | 88.1824268 |   |            |           |            |

|   |            |           |            |    |            |            |            |
|---|------------|-----------|------------|----|------------|------------|------------|
| H | -1.0483767 | 2.1182646 | 91.6176938 | H  | 3.9265517  | 9.8755948  | 88.1801636 |
| H | -2.4243391 | 2.6460599 | 93.6288618 | Zn | 2.6271678  | 4.9133759  | 86.3871293 |
| H | -3.4799574 | 2.1613693 | 92.2597553 | Br | 0.3222982  | 5.8808400  | 86.3866880 |
| H | -3.3327401 | 3.8872439 | 92.7066719 | C  | -0.1117934 | 0.8146995  | 88.9351249 |
| H | 7.3253176  | 5.9021524 | 87.2953580 | C  | 0.6562884  | -0.2661360 | 89.3825209 |
| H | 6.8209711  | 2.5150801 | 92.1456927 | C  | 0.0797482  | -1.1297782 | 90.3887710 |
| H | 6.5715485  | 0.1741123 | 84.5663567 | C  | 0.8140926  | -2.1617511 | 91.0475174 |
| C | 7.5979364  | 5.4274771 | 88.2656468 | C  | -1.2947810 | -0.9215490 | 90.7807975 |
| H | 3.6610922  | 2.8643369 | 92.7151088 | C  | -1.8913581 | -1.8018601 | 91.7325978 |
| H | 7.8928935  | 7.4031217 | 89.1494655 | C  | -2.0057093 | 0.2086874  | 90.2853335 |
| H | 4.6694010  | 1.7622093 | 83.9595469 | H  | -3.0244946 | 0.3996863  | 90.6560546 |
| C | 6.7396065  | 4.1715882 | 88.3846840 | C  | -1.4153655 | 1.1294062  | 89.4282892 |
| C | 6.1073296  | 1.6837718 | 91.9655708 | C  | 4.3275951  | 0.5528732  | 88.5870883 |
| C | 7.3492954  | 6.4621891 | 89.3711969 | C  | 4.8157028  | -0.7034596 | 88.2437980 |
| H | 7.7100092  | 6.1039145 | 90.3577637 | H  | 5.8868544  | -0.8200796 | 88.0187271 |
| C | 6.1879509  | 3.7379507 | 89.5998291 | C  | 3.9598940  | -1.8330760 | 88.1068469 |
| C | 6.7637770  | 0.7629653 | 85.4870644 | C  | 4.4629026  | -3.0877734 | 87.6483421 |
| H | 9.2920966  | 4.3463627 | 87.3615118 | C  | 2.5501749  | -1.6983794 | 88.3861573 |
| C | 6.5012084  | 3.3813821 | 87.2450798 | C  | 1.7000067  | -2.8131900 | 88.1186819 |
| C | 9.0920061  | 5.0536424 | 88.1912581 | C  | 2.0532978  | -0.4412651 | 88.8919814 |
| H | 9.7216974  | 5.9542073 | 88.0355625 | C  | 2.9407902  | 0.6433275  | 88.9241060 |
| H | 6.9324435  | 3.7019815 | 86.2818495 | O  | 0.4025994  | 1.6431108  | 87.9408649 |
| C | 4.1017775  | 3.2419926 | 91.7695966 | O  | 2.4858719  | 1.8858886  | 89.3510065 |
| H | 5.7448689  | 1.3309582 | 92.9533948 | P  | 1.5302565  | 2.7587838  | 88.3424365 |
| H | 6.6698811  | 0.8548394 | 91.4895473 | O  | 0.9771061  | 3.8854149  | 89.2204424 |
| C | 5.4224965  | 2.5602074 | 89.7016031 | O  | 2.2369334  | 3.0995814  | 87.0197582 |
| C | 4.8955236  | 2.3607863 | 84.8656386 | C  | -1.1603020 | -2.8236870 | 92.3181091 |
| C | 5.7185961  | 2.2134747 | 87.2802804 | C  | 0.2098707  | -2.9879980 | 91.9851906 |
| H | 7.1693776  | 0.0743995 | 86.2557924 | H  | -2.9442083 | -1.6361066 | 92.0101336 |
| H | 7.5578455  | 1.5035133 | 85.2547740 | H  | -1.6315242 | -3.4910133 | 93.0556757 |
| C | 4.9280955  | 2.1387072 | 91.0841018 | H  | 1.8781965  | -2.2970093 | 90.8125381 |
| C | 5.1779486  | 1.7882696 | 88.5318041 | H  | 0.8026564  | -3.7729867 | 92.4791189 |
| C | 5.4781104  | 1.4609475 | 85.9693982 | C  | 2.2177413  | -4.0129630 | 87.6512633 |
| H | 3.2749319  | 3.5864787 | 91.1188650 | C  | 3.6128840  | -4.1608271 | 87.4300506 |
| H | 3.9530625  | 2.8342546 | 85.2026411 | H  | 0.6180141  | -2.7089529 | 88.2792970 |
| H | 4.7271470  | 4.1222608 | 92.0273019 | H  | 1.5392921  | -4.8548637 | 87.4454273 |
| H | 6.2723121  | 6.7021607 | 89.4794913 | H  | 4.0132034  | -5.1202455 | 87.0686119 |
| H | 5.5978783  | 3.1653033 | 84.5637889 | H  | 5.5427850  | -3.1796951 | 87.4518984 |
| H | 9.4175554  | 4.5658825 | 89.1339232 | C  | -2.0310970 | 3.4227540  | 90.2315008 |
| H | 4.2662364  | 1.2594079 | 90.9585929 | C  | -2.0072277 | 2.4783270  | 89.1633620 |
| H | 4.7230347  | 0.6745721 | 86.1652183 | C  | -2.5355934 | 4.7118099  | 89.9755882 |
| H | 6.3593142  | 4.3279898 | 90.5119614 | C  | -2.4607220 | 2.8541536  | 87.8701920 |
| H | 4.4491417  | 6.3057810 | 84.9105597 | C  | -2.9599855 | 4.1541093  | 87.6734084 |
| H | 5.1049958  | 5.2134813 | 86.1778003 | C  | -3.0167581 | 5.0995469  | 88.7133561 |
| H | 5.5185942  | 8.7727046 | 86.2096319 | H  | -2.5547165 | 5.4509507  | 90.7911782 |
|   |            |           |            | C  | -2.4666816 | 1.8675453  | 86.7046839 |
|   |            |           |            | H  | -3.3243114 | 4.4350487  | 86.6724497 |
|   |            |           |            | C  | -1.6913820 | 2.3955764  | 85.4854192 |
|   |            |           |            | H  | -2.1645413 | 3.3049948  | 85.0605340 |
|   |            |           |            | H  | -1.6627901 | 1.6297746  | 84.6827535 |
|   |            |           |            | H  | -0.6487783 | 2.6525153  | 85.7546209 |
|   |            |           |            | C  | -3.9081126 | 1.4722151  | 86.3322320 |
|   |            |           |            | H  | -1.9557638 | 0.9436211  | 87.0455609 |
|   |            |           |            | H  | -4.4871461 | 2.3501511  | 85.9765369 |
|   |            |           |            | H  | -4.4465614 | 1.0480134  | 87.2038736 |
|   |            |           |            | H  | -3.9134168 | 0.7144136  | 85.5212791 |
|   |            |           |            | C  | -3.6377712 | 6.4772385  | 88.5139308 |
|   |            |           |            | C  | -2.9656631 | 7.2869596  | 87.3945743 |
|   |            |           |            | H  | -3.4535234 | 8.2775556  | 87.2848135 |
|   |            |           |            | H  | -3.0320101 | 6.7710097  | 86.4139721 |
|   |            |           |            | H  | -1.8951953 | 7.4590020  | 87.6198696 |
|   |            |           |            | C  | -5.1565136 | 6.3543442  | 88.2866258 |
|   |            |           |            | H  | -3.4790057 | 7.0359430  | 89.4617795 |
|   |            |           |            | H  | -5.6283514 | 7.3563453  | 88.2143966 |
|   |            |           |            | H  | -5.6457889 | 5.8006183  | 89.1133223 |
|   |            |           |            | H  | -5.3767059 | 5.8103901  | 87.3438654 |
|   |            |           |            | C  | -1.5464319 | 3.0963204  | 91.6462583 |
|   |            |           |            | C  | -0.5254476 | 4.1113290  | 92.1889210 |
|   |            |           |            | H  | -0.1840371 | 3.8032227  | 93.1988159 |
|   |            |           |            | H  | -0.9459403 | 5.1335173  | 92.2764054 |
|   |            |           |            | H  | 0.3611586  | 4.1710095  | 91.5296727 |

### 13d-mi

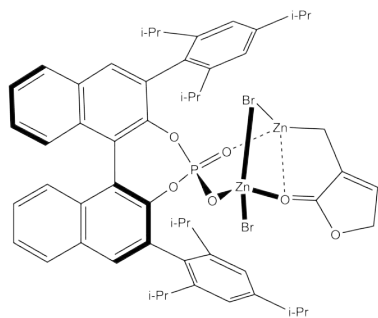

Energy (Hartree) = -11625.09896279

|    |            |           |            |
|----|------------|-----------|------------|
| Zn | 0.6005934  | 5.7780268 | 88.8785758 |
| Br | -0.0514144 | 7.5220044 | 90.2339835 |
| C  | 4.8712435  | 8.2980234 | 86.9723900 |
| C  | 4.3258602  | 7.0500567 | 86.9336186 |
| C  | 3.5783147  | 6.9138403 | 88.2081726 |
| O  | 3.7397094  | 7.9846443 | 88.9940369 |
| C  | 4.5365125  | 8.9503542 | 88.2760716 |
| O  | 2.8351121  | 5.9648627 | 88.5127142 |
| C  | 4.2870126  | 5.9423841 | 85.9515303 |
| H  | 5.4311456  | 9.1927098 | 88.8916569 |

|   |            |           |            |
|---|------------|-----------|------------|
| C | -2.7439305 | 2.9513117 | 92.6053727 |
| H | -1.0306130 | 2.1163379 | 91.6114058 |
| H | -2.4034809 | 2.6592107 | 93.6205187 |
| H | -3.4633539 | 2.1854700 | 92.2508978 |
| H | -3.2982308 | 3.9087918 | 92.6968387 |
| H | 7.3225815  | 5.8998572 | 87.2994963 |
| H | 6.8142861  | 2.5099465 | 92.1501997 |
| H | 6.5802998  | 0.1844381 | 84.5665256 |
| C | 7.5865935  | 5.4300280 | 88.2747020 |
| H | 3.6495571  | 2.8532415 | 92.7177233 |
| H | 7.8701786  | 7.4108350 | 89.1521374 |
| H | 4.6635555  | 1.7593831 | 83.9662520 |
| C | 6.7293330  | 4.1731711 | 88.3917313 |
| C | 6.1012730  | 1.6785483 | 91.9684947 |
| C | 7.3248277  | 6.4703112 | 89.3721726 |
| H | 7.6765032  | 6.1182017 | 90.3640856 |
| C | 6.1776052  | 3.7375961 | 89.6058037 |
| C | 6.7691698  | 0.7742189 | 85.4872694 |
| H | 9.2911337  | 4.3459084 | 87.3951798 |
| C | 6.4947043  | 3.3829201 | 87.2517873 |
| C | 9.0817691  | 5.0582453 | 88.2180325 |
| H | 9.7134449  | 5.9578283 | 88.0644179 |
| H | 6.9261593  | 3.7050214 | 86.2890208 |
| C | 4.0923175  | 3.2335464 | 91.7744499 |
| H | 5.7397512  | 1.3238291 | 92.9558692 |
| H | 6.6653237  | 0.8515847 | 91.4912528 |
| C | 5.4163575  | 2.5572971 | 89.7063792 |
| C | 4.8838364  | 2.3567312 | 84.8745242 |
| C | 5.7162033  | 2.2123824 | 87.2856198 |
| H | 7.1834031  | 0.0888469 | 86.2541417 |
| H | 7.5571032  | 1.5207932 | 85.2537004 |
| C | 4.9215373  | 2.1333693 | 91.0878674 |
| C | 5.1758299  | 1.7850343 | 88.5361462 |
| C | 5.4789436  | 1.4600590 | 85.9740782 |
| H | 3.2660521  | 3.5791230 | 91.1238133 |
| H | 3.9358909  | 2.8149695 | 85.2162107 |
| H | 4.7148272  | 4.1144196 | 92.0368324 |
| H | 6.2464185  | 6.7084163 | 89.4691812 |
| H | 5.5755337  | 3.1710574 | 84.5739411 |
| H | 9.3975404  | 4.5748536 | 89.1660152 |
| H | 4.2614373  | 1.2531380 | 90.9600862 |
| H | 4.7312325  | 0.6670086 | 86.1707009 |
| H | 6.3451253  | 4.3277548 | 90.5185764 |
| H | 4.4473111  | 6.2842698 | 84.9124138 |
| H | 5.0769050  | 5.2011697 | 86.2041748 |
| H | 5.4741700  | 8.7835683 | 86.1927530 |

### 13j-ma; COSMO

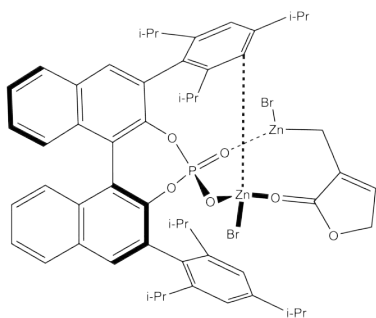

Energy (Hartree) = -11625.11623981

|    |            |           |            |
|----|------------|-----------|------------|
| Zn | -0.4750064 | 5.4619337 | 89.2400403 |
| Br | -0.3139477 | 7.5854665 | 90.2068190 |
| H  | 3.3743472  | 6.6396805 | 86.5363238 |
| Br | 0.9550399  | 0.3763036 | 85.0691777 |
| H  | -0.8976536 | 4.4238358 | 84.5807698 |
| Zn | 0.8671441  | 2.6943410 | 85.3073544 |
| C  | 2.0123103  | 6.2004523 | 84.8897520 |
| C  | 2.4040836  | 6.9739023 | 86.1024146 |
| C  | 0.8844081  | 5.4705745 | 85.1502213 |

|   |            |            |            |
|---|------------|------------|------------|
| C | 0.2002420  | 4.3919308  | 84.4307255 |
| C | 0.5126753  | 5.8165308  | 86.5362109 |
| O | 1.3757133  | 6.6860170  | 87.0732592 |
| O | -0.4627871 | 5.3866853  | 87.1865857 |
| H | 2.4498491  | 8.0762820  | 85.9683323 |
| H | 0.4342671  | 4.3729482  | 83.3495140 |
| H | 2.6043586  | 6.1917951  | 83.9648943 |
| C | -0.2004085 | 0.9202660  | 89.2444542 |
| C | 0.6646709  | -0.1342165 | 89.5471001 |
| C | 0.2689414  | -1.0395598 | 90.6015185 |
| C | 1.1322783  | -2.0562600 | 91.1103425 |
| C | -1.0413398 | -0.8999339 | 91.1956718 |
| C | -1.4509872 | -1.8199122 | 92.2072575 |
| C | -1.8812830 | 0.1874270  | 90.8133667 |
| H | -2.8585694 | 0.3041642  | 91.3063712 |
| C | -1.4583032 | 1.1312295  | 89.8886627 |
| C | 4.1024214  | 0.8021295  | 88.1027759 |
| C | 4.5213239  | -0.4203781 | 87.5916214 |
| H | 5.5230615  | -0.5011226 | 87.1440213 |
| C | 3.6713664  | -1.5623240 | 87.5762430 |
| C | 4.0824403  | -2.7758733 | 86.9474501 |
| C | 2.3541985  | -1.4802749 | 88.1583503 |
| C | 1.4813987  | -2.5995317 | 88.0131457 |
| C | 1.9586356  | -0.2604325 | 88.8188541 |
| C | 2.8178401  | 0.8408430  | 88.7271205 |
| O | 0.1293526  | 1.8156880  | 88.2390406 |
| O | 2.4305176  | 2.0550463  | 89.3018188 |
| P | 1.3220785  | 2.9335565  | 88.4725010 |
| O | 0.8974422  | 4.0432145  | 89.4481279 |
| O | 1.7660845  | 3.3115998  | 87.0598266 |
| C | -0.5979621 | -2.8186574 | 92.6525493 |
| C | 0.7101681  | -2.9231596 | 92.1092814 |
| H | -2.4570638 | -1.7086845 | 92.6415049 |
| H | -0.9248304 | -3.5175588 | 93.4374388 |
| H | 2.1497209  | -2.1450529 | 90.7058278 |
| H | 1.3986509  | -3.6948545 | 92.4862046 |
| C | 1.9027683  | -3.7580842 | 87.3753513 |
| C | 3.2198291  | -3.8573659 | 86.8523985 |
| H | 0.4546328  | -2.5321219 | 88.3982160 |
| H | 1.2064521  | -4.6036952 | 87.2667428 |
| H | 3.5451218  | -4.7840687 | 86.3554525 |
| H | 5.0952390  | -2.8275471 | 86.5176974 |
| C | -2.0664203 | 3.4831781  | 90.5301070 |
| C | -2.1572841 | 2.4194142  | 89.5918118 |
| C | -2.5475380 | 4.7642852  | 90.1458568 |
| C | -2.7582435 | 2.6329747  | 88.3193251 |
| C | -3.2513231 | 3.9095582  | 87.9943703 |
| C | -3.1548499 | 4.9946623  | 88.8813638 |
| H | -2.5608040 | 5.5776521  | 90.8894987 |
| C | -2.9005106 | 1.4821847  | 87.3290990 |
| H | -3.7085632 | 4.0677497  | 87.0085863 |
| C | -2.7418835 | 1.9071879  | 85.8638598 |
| H | -3.5915578 | 2.5246592  | 85.5054166 |
| H | -2.6775542 | 1.0147392  | 85.2108254 |
| H | -1.8109714 | 2.4903926  | 85.7183225 |
| C | -4.2370166 | 0.7517250  | 87.5685497 |
| H | -2.0881965 | 0.7584286  | 87.5417721 |
| H | -5.0968365 | 1.4305150  | 87.3886855 |
| H | -4.3109723 | 0.3783770  | 88.6100217 |
| H | -4.3346794 | -0.1159286 | 86.8844163 |
| C | -3.7257542 | 6.3706628  | 88.5679386 |
| C | -3.6915757 | 6.7295139  | 87.0766012 |
| H | -3.9935651 | 7.7861209  | 86.9324236 |
| H | -4.3938831 | 6.1062631  | 86.4844083 |
| H | -2.6753870 | 6.5964686  | 86.6559712 |
| C | -5.1515387 | 6.4864701  | 89.1442311 |
| H | -3.0835510 | 7.1030063  | 89.1071954 |
| H | -5.5543331 | 7.5074707  | 88.9838022 |
| H | -5.1693605 | 6.2782472  | 90.2329850 |
| H | -5.8355745 | 5.7655401  | 88.6492333 |
| C | -1.5338712 | 3.2797126  | 91.9461758 |

|   |            |           |            |   |            |            |            |
|---|------------|-----------|------------|---|------------|------------|------------|
| C | -0.5681640 | 4.3737832 | 92.4269751 | C | 0.9185065  | 5.4741667  | 85.1750320 |
| H | -0.2241291 | 4.1416547 | 93.4551250 | C | 0.2157181  | 4.4199742  | 84.4408496 |
| H | -1.0345714 | 5.3795987 | 92.4568618 | C | 0.5399670  | 5.8142372  | 86.5621249 |
| H | 0.3278942  | 4.4290016 | 91.7781398 | O | 1.4249469  | 6.6480829  | 87.1209988 |
| C | -2.7254144 | 3.1259869 | 92.9144878 | O | -0.4554121 | 5.4095208  | 87.1954708 |
| H | -0.9713207 | 2.3250783 | 91.9532283 | H | 2.5777747  | 8.0081499  | 86.0631467 |
| H | -2.3653592 | 2.9006123 | 93.9390854 | H | 0.4542290  | 4.4038864  | 83.3606794 |
| H | -3.4073856 | 2.3100243 | 92.6014021 | H | 2.6743922  | 6.1540799  | 84.0211396 |
| H | -3.3213483 | 4.0615857 | 92.9611713 | C | -0.2063959 | 0.9167743  | 89.2411044 |
| H | 7.2212348  | 6.0183205 | 86.5348848 | C | 0.6592281  | -0.1370383 | 89.5448113 |
| H | 7.4096570  | 2.3856265 | 91.1711612 | C | 0.2620999  | -1.0444245 | 90.5968044 |
| H | 5.1029694  | 0.7860613 | 83.7419474 | C | 1.1247532  | -2.0616526 | 91.1050753 |
| C | 7.1477200  | 5.7922076 | 87.6217787 | C | -1.0491355 | -0.9068821 | 91.1888673 |
| H | 4.5016927  | 2.5101415 | 92.5030338 | C | -1.4593421 | -1.8291912 | 92.1974326 |
| H | 6.8920463  | 7.9133001 | 88.1421438 | C | -1.8883612 | 0.1806526  | 90.8066010 |
| H | 3.2517709  | 2.6047737 | 83.7283587 | H | -2.8658911 | 0.2981812  | 91.2992672 |
| C | 6.3907221  | 4.4758746 | 87.7480349 | C | -1.4656332 | 1.1260210  | 89.8834684 |
| C | 6.6914258  | 1.5479364 | 91.0477261 | C | 4.0971007  | 0.8088524  | 88.1077674 |
| C | 6.3698709  | 6.9444806 | 88.2845152 | C | 4.5218079  | -0.4137665 | 87.6021979 |
| H | 6.2588091  | 6.7772644 | 89.3762412 | H | 5.5250479  | -0.4906414 | 87.1574369 |
| C | 6.1967804  | 3.8614234 | 88.9976157 | C | 3.6762998  | -1.5585928 | 87.5859794 |
| C | 5.5616693  | 1.2568691 | 84.6360404 | C | 4.0926914  | -2.7719533 | 86.9613920 |
| H | 9.1480530  | 4.8803509 | 87.6807528 | C | 2.3563517  | -1.4787369 | 88.1616124 |
| C | 5.8368099  | 3.8514212 | 86.6187371 | C | 1.4867376  | -2.5997095 | 88.0128957 |
| C | 8.5806968  | 5.6954563 | 88.1736450 | C | 1.9553765  | -0.2595336 | 88.8200673 |
| H | 9.1306861  | 6.6456150 | 88.0121861 | C | 2.8113645  | 0.8445159  | 88.7299883 |
| H | 5.9800479  | 4.3255155 | 85.6341386 | O | 0.1243354  | 1.8127545  | 88.2377055 |
| C | 4.6616452  | 3.0119785 | 91.5262699 | O | 2.4211806  | 2.0575569  | 89.3038150 |
| H | 6.5786678  | 1.0532978 | 92.0348638 | P | 1.3117051  | 2.9355488  | 88.4755097 |
| H | 7.1446935  | 0.8177524 | 90.3467076 | O | 0.8794134  | 4.0393359  | 89.4530986 |
| C | 5.4711218  | 2.6655282 | 89.1389674 | O | 1.7554902  | 3.3187263  | 87.0638996 |
| C | 3.8516352  | 3.1055269 | 84.5174472 | C | -0.6073114 | -2.8284497 | 92.6417607 |
| C | 5.0971741  | 2.6559786 | 86.7026082 | C | 0.7011962  | -2.9310393 | 92.1005896 |
| H | 6.0177444  | 0.4528750 | 85.2459961 | H | -2.4662145 | -1.7192969 | 92.6302072 |
| H | 6.3829695  | 1.9206886 | 84.2920058 | H | -0.9355327 | -3.5293021 | 93.4242715 |
| C | 5.3302138  | 2.0488214 | 90.5292852 | H | 2.1424388  | -2.1485215 | 90.7011097 |
| C | 4.9169898  | 2.0529398 | 87.9805254 | H | 1.3893399  | -3.7034865 | 92.4764162 |
| C | 4.5084324  | 2.0541054 | 85.4279964 | C | 1.9140664  | -3.7578399 | 87.3792868 |
| H | 3.6778496  | 3.3516437 | 91.1475987 | C | 3.2334883  | -3.8551591 | 86.8637145 |
| H | 3.1974495  | 3.7855566 | 85.1000612 | H | 0.4577553  | -2.5326662 | 88.3916640 |
| H | 5.2895515  | 3.9079669 | 91.7139337 | H | 1.2196348  | -4.6043991 | 87.2671526 |
| H | 5.3492146  | 7.0383770 | 87.8598055 | H | 3.5631867  | -4.7813921 | 86.3690182 |
| H | 4.5970187  | 3.7428788 | 83.9968404 | H | 5.1072383  | -2.8213355 | 86.5356564 |
| H | 8.5807711  | 5.4934636 | 89.2651501 | C | -2.0834316 | 3.4731050  | 90.5338333 |
| H | 4.6738073  | 1.1595973 | 90.4404723 | C | -2.1648742 | 2.4143837  | 89.5890522 |
| H | 3.7064328  | 1.3496946 | 85.7291653 | C | -2.5641526 | 4.7543707  | 90.1537081 |
| H | 6.6223733  | 4.3308660 | 89.8991708 | C | -2.7541410 | 2.6345881  | 88.3120183 |
|   |            |           |            | C | -3.2443508 | 3.9127500  | 87.9909742 |
|   |            |           |            | C | -3.1583835 | 4.9924018  | 88.8858995 |
|   |            |           |            | H | -2.5744844 | 5.5668090  | 90.8982541 |
|   |            |           |            | C | -2.8843971 | 1.4891213  | 87.3132609 |
|   |            |           |            | H | -3.6898581 | 4.0775275  | 87.0010838 |
|   |            |           |            | C | -2.7555103 | 1.9278314  | 85.8492555 |
|   |            |           |            | H | -3.6294246 | 2.5181878  | 85.5028760 |
|   |            |           |            | H | -2.6659944 | 1.0424756  | 85.1898946 |
|   |            |           |            | H | -1.8463636 | 2.5429790  | 85.6970627 |
|   |            |           |            | C | -4.1995516 | 0.7248712  | 87.5639096 |
|   |            |           |            | H | -2.0522053 | 0.7829142  | 87.5067602 |
|   |            |           |            | H | -5.0779195 | 1.3846539  | 87.4043650 |
|   |            |           |            | H | -4.2493829 | 0.3386495  | 88.6019740 |
|   |            |           |            | H | -4.2876445 | -0.1378608 | 86.8723350 |
|   |            |           |            | C | -3.7250669 | 6.3709041  | 88.5749723 |
|   |            |           |            | C | -3.6948255 | 6.7305938  | 87.0839757 |
|   |            |           |            | H | -3.9894939 | 7.7894176  | 86.9411837 |
|   |            |           |            | H | -4.4041600 | 6.1137350  | 86.4931886 |
|   |            |           |            | H | -2.6812257 | 6.5914358  | 86.6593566 |
|   |            |           |            | C | -5.1477870 | 6.4943800  | 89.1565743 |
|   |            |           |            | H | -3.0760776 | 7.0999165  | 89.1109524 |
|   |            |           |            | H | -5.5467462 | 7.5173671  | 88.9992222 |
|   |            |           |            | H | -5.1630491 | 6.2854649  | 90.2451487 |
|   |            |           |            | H | -5.8385320 | 5.7774609  | 88.6650347 |

### 13j-ma

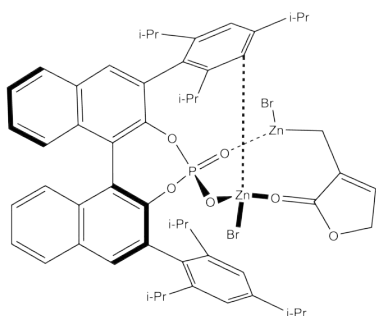

Energy (Hartree) = -11625.10530852

|    |            |           |            |
|----|------------|-----------|------------|
| Zn | -0.4599761 | 5.4856233 | 89.2582311 |
| Br | -0.3693748 | 7.5955169 | 90.2335968 |
| H  | 3.4246856  | 6.5149611 | 86.6128407 |
| Br | 0.9266918  | 0.3921391 | 85.0621158 |
| H  | -0.8817928 | 4.4712707 | 84.5865925 |
| Zn | 0.8492767  | 2.6995952 | 85.3089846 |
| C  | 2.0709902  | 6.1730754 | 84.9383082 |
| C  | 2.4785210  | 6.9060892 | 86.1720541 |



|   |            |           |            |    |            |            |            |
|---|------------|-----------|------------|----|------------|------------|------------|
| C | -1.5559966 | 3.2666416 | 91.9518715 | O  | 3.4767375  | 6.4835811  | 88.3510380 |
| C | -0.5696047 | 4.3455129 | 92.4260700 | C  | 3.2692925  | 6.0966454  | 85.3488584 |
| H | -0.2357183 | 4.1189038 | 93.4588631 | H  | -0.1568053 | 8.2569642  | 87.4688078 |
| H | -1.0117188 | 5.3625979 | 92.4403042 | H  | -0.5525389 | 6.5093961  | 87.6196667 |
| H | 0.3308442  | 4.3733951 | 91.7817584 | Zn | 2.8928477  | 4.1145100  | 85.4120766 |
| C | -2.7497157 | 3.1379920 | 92.9206060 | Br | 1.5578871  | 2.6105276  | 84.2337456 |
| H | -1.0108776 | 2.3020814 | 91.9641645 | H  | 4.2871182  | 6.2982089  | 85.7342774 |
| H | -2.3952739 | 2.9113471 | 93.9469201 | H  | 3.1596009  | 6.4600840  | 84.3102206 |
| H | -3.4457355 | 2.3324665 | 92.6108762 | H  | 0.3729229  | 6.9612649  | 85.0963895 |
| H | -3.3307262 | 4.0830516 | 92.9636016 | C  | 0.3905627  | 1.5146701  | 88.9077935 |
| H | 7.1494198  | 6.0532685 | 86.5074026 | C  | 0.9490515  | 0.2553709  | 89.1705344 |
| H | 7.3905486  | 2.4308749 | 91.1619795 | C  | 0.2492964  | -0.6098959 | 90.0938710 |
| H | 5.1254471  | 0.7561232 | 83.7536141 | C  | 0.8031063  | -1.8324802 | 90.5829890 |
| C | 7.1200299  | 5.8087067 | 87.5927026 | C  | -1.0471251 | -0.2106939 | 90.5869767 |
| H | 4.4802745  | 2.5562281 | 92.4977865 | C  | -1.7568626 | -1.0725893 | 91.4764054 |
| H | 6.9184652  | 7.9240643 | 88.1574841 | C  | -1.5850429 | 1.0509636  | 90.2063130 |
| C | 3.2535843  | 2.5525300 | 83.7134315 | H  | -2.5825714 | 1.3361695  | 90.5743689 |
| C | 6.3582488  | 4.4959771 | 87.7282222 | C  | -0.8765339 | 1.9415075  | 89.4089279 |
| C | 6.6735967  | 1.5910718 | 91.0464527 | C  | 4.7123345  | 0.3357343  | 88.3775970 |
| C | 6.3907090  | 6.9597837 | 88.3094012 | C  | 4.9027079  | -0.9311363 | 87.8368587 |
| H | 6.3295436  | 6.7789879 | 89.4026603 | H  | 5.9208228  | -1.2749287 | 87.5984763 |
| C | 6.1645465  | 3.8915062 | 88.9822831 | C  | 3.8059774  | -1.7966928 | 87.5456360 |
| C | 5.5742957  | 1.2422095 | 84.6443062 | C  | 4.0132723  | -3.0505416 | 86.8953307 |
| H | 9.1081492  | 4.8708243 | 87.5417941 | C  | 2.4589857  | -1.3960817 | 87.8812542 |
| C | 5.8138717  | 3.8565810 | 86.6029829 | C  | 1.3803175  | -2.2434881 | 87.4909397 |
| C | 8.5749382  | 5.6813582 | 88.0778238 | C  | 2.2599872  | -0.1512949 | 88.5826470 |
| H | 9.1316455  | 6.6276430 | 87.9163490 | C  | 3.3700575  | 0.6780002  | 88.7465114 |
| H | 5.9596692  | 4.3206983 | 85.6138956 | O  | 1.0535184  | 2.4101252  | 88.0695882 |
| C | 4.6397639  | 3.0525810 | 91.5182719 | O  | 3.1831885  | 1.8984991  | 89.3831518 |
| H | 6.5648202  | 1.1035934 | 92.0375268 | P  | 2.4468833  | 3.1090275  | 88.5693988 |
| H | 7.1275351  | 0.8573802 | 90.3498600 | O  | 2.1887271  | 4.1645173  | 89.6703060 |
| C | 5.4487164  | 2.6913333 | 89.1323070 | O  | 3.2053371  | 3.5687634  | 87.3353872 |
| C | 3.8446897  | 3.0690185 | 84.4985115 | C  | -1.2023253 | -2.2692764 | 91.9037598 |
| C | 5.0841592  | 2.6556989 | 86.6948633 | C  | 0.0966726  | -2.6395170 | 91.4643918 |
| H | 6.0375021  | 0.4505070 | 85.2646034 | H  | -2.7511043 | -0.7573016 | 91.8301201 |
| H | 6.3901685  | 1.9112867 | 84.2977956 | H  | -1.7563291 | -2.9225100 | 92.5949635 |
| C | 5.3101940  | 2.0849274 | 90.5272523 | H  | 1.8112244  | -2.1310183 | 90.2658870 |
| C | 4.9040028  | 2.0636024 | 87.9777003 | H  | 0.5522865  | -3.5723214 | 91.8303232 |
| C | 4.5082817  | 2.0350090 | 85.4232690 | C  | 1.6157867  | -3.4464943 | 86.8387827 |
| H | 3.6557011  | 3.3894262 | 91.1383906 | C  | 2.9429099  | -3.8632804 | 86.5512182 |
| H | 3.1799312  | 3.7465677 | 85.0720301 | H  | 0.3494289  | -1.9274781 | 87.7048857 |
| H | 5.2656385  | 3.9507015 | 91.7022214 | H  | 0.7667133  | -4.0792786 | 86.5384694 |
| H | 5.3515830  | 7.0740455 | 87.9382729 | H  | 3.1184428  | -4.8230236 | 86.0417873 |
| H | 4.5855908  | 3.7098215 | 83.9752229 | H  | 5.0446881  | -3.3529640 | 86.6547299 |
| H | 8.6184981  | 5.4504902 | 89.1626361 | C  | -1.3755448 | 4.3624432  | 89.9783597 |
| H | 4.6563242  | 1.1932639 | 90.4450712 | C  | -1.4540961 | 3.2809324  | 89.0572718 |
| H | 3.7109446  | 1.3257373 | 85.7254521 | C  | -2.0419673 | 5.5617885  | 89.6642977 |
| H | 6.5838254  | 4.3717757 | 89.8810425 | C  | -2.1260547 | 3.4452951  | 87.8156364 |
|   |            |           |            | C  | -2.7680453 | 4.6695668  | 87.5466815 |
|   |            |           |            | C  | -2.7579339 | 5.7344908  | 88.4647654 |
|   |            |           |            | H  | -1.9948547 | 6.4032449  | 90.3740388 |
|   |            |           |            | C  | -2.2053660 | 2.3033297  | 86.8039100 |
|   |            |           |            | H  | -3.2957244 | 4.7879170  | 86.5897267 |
|   |            |           |            | C  | -2.1308797 | 2.7749427  | 85.3444900 |
|   |            |           |            | H  | -3.0312665 | 3.3507701  | 85.0437892 |
|   |            |           |            | H  | -2.0624924 | 1.9006068  | 84.6662331 |
|   |            |           |            | H  | -1.2321673 | 3.3982887  | 85.1671014 |
|   |            |           |            | C  | -3.4667429 | 1.4524185  | 87.0511313 |
|   |            |           |            | H  | -1.3238880 | 1.6505362  | 86.9724694 |
|   |            |           |            | H  | -4.3843022 | 2.0609397  | 86.9070796 |
|   |            |           |            | H  | -3.4888983 | 1.0461600  | 88.0822633 |
|   |            |           |            | H  | -3.5089892 | 0.5970397  | 86.3454066 |
|   |            |           |            | C  | -3.5152355 | 7.0354018  | 88.2152758 |
|   |            |           |            | C  | -3.6006111 | 7.4369454  | 86.7355858 |
|   |            |           |            | H  | -4.0544131 | 8.4432388  | 86.6320929 |
|   |            |           |            | H  | -4.2335124 | 6.7341561  | 86.1550908 |
|   |            |           |            | H  | -2.6022959 | 7.4618020  | 86.2520561 |
|   |            |           |            | C  | -4.9210389 | 6.9582387  | 88.8445636 |
|   |            |           |            | H  | -2.9571723 | 7.8359401  | 88.7519681 |
|   |            |           |            | H  | -5.4639558 | 7.9191237  | 88.7277067 |
|   |            |           |            | H  | -4.8657051 | 6.7213203  | 89.9259658 |

### 13j-mi; COSMO

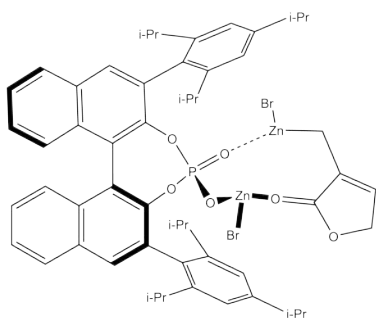

Energy (Hartree)= -11625.09011035

|    |           |           |            |
|----|-----------|-----------|------------|
| Zn | 3.3979718 | 5.5988692 | 90.1368026 |
| Br | 4.4994508 | 6.1537737 | 92.0523581 |
| C  | 0.9115704 | 6.9497564 | 86.0537385 |
| C  | 2.2294733 | 6.6151840 | 86.2481193 |
| C  | 2.4297516 | 6.7085228 | 87.7052752 |
| O  | 1.3066671 | 7.0701087 | 88.3388570 |
| C  | 0.2560082 | 7.2301840 | 87.3589398 |

|   |            |            |            |
|---|------------|------------|------------|
| H | -5.5220394 | 6.1626068  | 88.3563139 |
| C | -0.5890435 | 4.2509063  | 91.2843108 |
| C | 0.1749793  | 5.5418358  | 91.6327052 |
| H | 0.9361059  | 5.3427411  | 92.4144252 |
| H | -0.4980729 | 6.3321053  | 92.0260477 |
| H | 0.6872027  | 5.9573640  | 90.7420874 |
| C | -1.4956476 | 3.8339160  | 92.4582992 |
| H | 0.1690370  | 3.4546696  | 91.1374203 |
| H | -0.9083830 | 3.7519788  | 93.3963428 |
| H | -1.9810329 | 2.8554224  | 92.2758922 |
| H | -2.2975301 | 4.5844569  | 92.6214443 |
| H | 8.6962955  | 5.1928222  | 88.1157424 |
| H | 7.4782445  | 1.2478893  | 92.0954960 |
| H | 7.4469322  | 0.9471500  | 84.2214464 |
| C | 7.9221696  | 5.1625131  | 88.9151960 |
| H | 4.4053131  | 1.5998072  | 92.9668545 |
| H | 7.3471695  | 7.2574851  | 88.5494228 |
| H | 4.9479178  | 1.5095042  | 84.2483611 |
| C | 7.2620989  | 3.7916917  | 88.8340322 |
| C | 6.6998783  | 0.5235348  | 91.7759436 |
| C | 6.8791489  | 6.2520195  | 88.5907850 |
| H | 6.0975851  | 6.2795793  | 89.3784583 |
| C | 6.7205472  | 3.1436185  | 89.9565406 |
| C | 7.5441741  | 1.5271641  | 85.1616316 |
| H | 9.3313188  | 4.6545491  | 90.5285868 |
| C | 7.1243224  | 3.1591962  | 87.5856022 |
| C | 8.6116794  | 5.4525904  | 90.2551559 |
| H | 9.1644840  | 6.4125429  | 90.2052094 |
| H | 7.5875768  | 3.6351139  | 86.7070056 |
| C | 4.8039454  | 2.1822217  | 92.1109514 |
| H | 6.3690249  | -0.0385585 | 92.6740951 |
| H | 7.1748272  | -0.1930814 | 91.0753886 |
| C | 5.9843622  | 1.9499800  | 89.8420739 |
| C | 5.0463785  | 1.9420698  | 85.2644134 |
| C | 6.3976419  | 1.9681107  | 87.4122429 |
| H | 8.4393442  | 1.1598567  | 85.7031182 |
| H | 7.7328792  | 2.5816505  | 84.8715429 |
| C | 5.5100672  | 1.2490370  | 91.1149855 |
| C | 5.7612583  | 1.3893983  | 88.5515194 |
| C | 6.2687308  | 1.3764886  | 86.0057327 |
| H | 3.9569415  | 2.7110746  | 91.6333404 |
| H | 4.1095564  | 1.7268896  | 85.8117812 |
| H | 5.4894888  | 2.9487979  | 92.5266182 |
| H | 6.3706644  | 6.0604190  | 87.6249449 |
| H | 5.1520541  | 3.0468052  | 85.1487443 |
| H | 7.8731221  | 5.5468018  | 91.0784036 |
| H | 4.7822106  | 0.4649889  | 90.8223130 |
| H | 6.0874042  | 0.2897138  | 86.1142305 |
| H | 6.8624038  | 3.5819405  | 90.9549316 |

|    |            |            |            |
|----|------------|------------|------------|
| C  | 0.2931709  | 6.9768142  | 87.4964923 |
| O  | 3.6540374  | 6.2925130  | 87.8477867 |
| C  | 2.7612119  | 5.4794610  | 85.0293336 |
| H  | -0.1041709 | 8.0152879  | 87.5305409 |
| H  | -0.4226058 | 6.3247038  | 88.0468185 |
| Zn | 2.5735031  | 3.5065579  | 85.4301459 |
| Br | 1.4873600  | 1.5723235  | 84.7389612 |
| H  | 3.8341575  | 5.7408980  | 85.1125357 |
| H  | 2.3882960  | 5.6915002  | 84.0098981 |
| H  | -0.1195014 | 6.3430117  | 85.3462856 |
| C  | 0.3896237  | 1.5686132  | 88.9167709 |
| C  | 0.9311023  | 0.2922100  | 89.1374636 |
| C  | 0.1664737  | -0.6214963 | 89.9598358 |
| C  | 0.6873731  | -1.8697352 | 90.4193937 |
| C  | -1.1653065 | -0.2546556 | 90.3776992 |
| C  | -1.9351963 | -1.1681094 | 91.1581226 |
| C  | -1.6772194 | 1.0285213  | 90.0372900 |
| H  | -2.6967935 | 1.2991078  | 90.3526833 |
| C  | -0.9108527 | 1.9623197  | 89.3525117 |
| C  | 4.7363116  | 0.3714828  | 88.5303872 |
| C  | 4.9415102  | -0.8992682 | 87.9947447 |
| H  | 5.9667620  | -1.2468525 | 87.8029892 |
| C  | 3.8551808  | -1.7435399 | 87.6242764 |
| C  | 4.0866519  | -2.9831610 | 86.9558073 |
| C  | 2.4949553  | -1.3277242 | 87.8738924 |
| C  | 1.4332083  | -2.1338701 | 87.3702648 |
| C  | 2.2705248  | -0.1072778 | 88.6095044 |
| C  | 3.3796008  | 0.6992806  | 88.8607061 |
| O  | 1.0747834  | 2.5289407  | 88.1827624 |
| O  | 3.1610307  | 1.9047258  | 89.5206391 |
| P  | 2.5371898  | 3.1157493  | 88.6269338 |
| O  | 2.4064784  | 4.2850612  | 89.6317260 |
| O  | 3.2964644  | 3.3995711  | 87.3377273 |
| C  | -1.4092551 | -2.3872165 | 91.5550334 |
| C  | -0.0789166 | -2.7279435 | 91.1953745 |
| H  | -2.9546642 | -0.8741640 | 91.4536147 |
| H  | -2.0107014 | -3.0806747 | 92.1621832 |
| H  | 1.7183359  | -2.1476706 | 90.1640864 |
| H  | 0.3541408  | -3.6793677 | 91.5399452 |
| C  | 1.6943327  | -3.3200936 | 86.6987030 |
| C  | 3.0302768  | -3.7602868 | 86.5053085 |
| H  | 0.3968244  | -1.7959661 | 87.5095525 |
| H  | 0.8588828  | -3.9203448 | 86.3075422 |
| H  | 3.2253576  | -4.7076503 | 85.9801529 |
| H  | 5.1272391  | -3.2997144 | 86.7820622 |
| C  | -1.3922219 | 4.3366625  | 90.0771513 |
| C  | -1.4617522 | 3.3302461  | 89.0757649 |
| C  | -2.0875414 | 5.5435038  | 89.8673981 |
| C  | -2.1190895 | 3.5913069  | 87.8443276 |
| C  | -2.7990342 | 4.8141220  | 87.6842160 |
| C  | -2.8225868 | 5.7930773  | 88.6934170 |
| H  | -2.0550666 | 6.3231622  | 90.6453568 |
| C  | -2.1230362 | 2.5644923  | 86.7144556 |
| H  | -3.3309988 | 5.0002425  | 86.7393502 |
| C  | -1.8553113 | 3.1985547  | 85.3405740 |
| H  | -2.6838064 | 3.8615424  | 85.0136598 |
| H  | -1.7297536 | 2.4112758  | 84.5715135 |
| H  | -0.9152071 | 3.7860324  | 85.3523837 |
| C  | -3.4295843 | 1.7493558  | 86.7181207 |
| H  | -1.2886673 | 1.8573810  | 86.9010418 |
| H  | -4.3085288 | 2.4059723  | 86.5463841 |
| H  | -3.5792530 | 1.2325965  | 87.6876147 |
| H  | -3.4158941 | 0.9802853  | 85.9186940 |
| C  | -3.6352484 | 7.0760125  | 88.5560760 |
| C  | -3.5734546 | 7.7030181  | 87.1546131 |
| H  | -4.1007169 | 8.6784044  | 87.1393924 |
| H  | -4.0610261 | 7.0593790  | 86.3935106 |
| H  | -2.5290288 | 7.8777446  | 86.8244637 |
| C  | -5.0954834 | 6.8263343  | 88.9828990 |
| H  | -3.1999177 | 7.8084960  | 89.2722692 |
| H  | -5.6890886 | 7.7634126  | 88.9473536 |

### 13j-mi

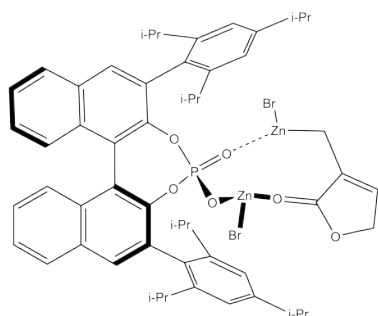

Energy (Hartree) = -11625.08015561

|    |           |           |            |
|----|-----------|-----------|------------|
| Zn | 3.7568345 | 5.6781159 | 89.7684787 |
| Br | 4.7543614 | 6.5939998 | 91.5968856 |
| C  | 0.6308895 | 6.4757978 | 86.1373514 |
| C  | 1.9614754 | 6.1432607 | 86.0683832 |
| C  | 2.4964419 | 6.4594643 | 87.4081502 |
| O  | 1.5444014 | 6.9586702 | 88.2131469 |

|   |            |           |            |    |            |            |            |
|---|------------|-----------|------------|----|------------|------------|------------|
| H | -5.1488226 | 6.4214926 | 90.0131608 | O  | 2.0583405  | 6.8486667  | 88.0799609 |
| H | -5.5787162 | 6.0888663 | 88.3083602 | C  | 0.7213949  | 6.9679591  | 87.5611970 |
| C | -0.5823649 | 4.1322661 | 91.3567279 | O  | 3.9665844  | 5.8097230  | 87.5103005 |
| C | 0.2230127  | 5.3823979 | 91.7522910 | C  | 2.5710389  | 5.0032607  | 84.8900861 |
| H | 0.9573513  | 5.1342167 | 92.5449787 | H  | 0.4438624  | 8.0444335  | 87.5572181 |
| H | -0.4281967 | 6.1889186 | 92.1492841 | H  | 0.0372475  | 6.4387869  | 88.2648395 |
| H | 0.7865273  | 5.7845565 | 90.8886751 | Zn | 2.3579407  | 3.0666142  | 85.4021241 |
| C | -1.4756479 | 3.6618588 | 92.5199112 | Br | 1.3884320  | 1.0033678  | 84.8815277 |
| H | 0.1522029  | 3.3260002 | 91.1498168 | H  | 3.6603233  | 5.1698663  | 84.7674263 |
| H | -0.8732786 | 3.5037553 | 93.4381255 | H  | 2.0498631  | 5.2006390  | 83.9341525 |
| H | -1.9886634 | 2.7092238 | 92.2820332 | H  | -0.0938380 | 6.2455953  | 85.5563398 |
| H | -2.2550397 | 4.4186642 | 92.7491078 | C  | 0.2872823  | 1.4097126  | 88.9031441 |
| H | 8.8816411  | 5.0770144 | 88.1268251 | C  | 0.8474891  | 0.1371001  | 89.1162501 |
| H | 7.4310740  | 1.5505776 | 92.2271806 | C  | 0.0539066  | -0.8062481 | 89.8796576 |
| H | 7.5941821  | 0.7914839 | 84.3946615 | C  | 0.5730038  | -2.0539937 | 90.3439079 |
| C | 8.0251194  | 5.1915737 | 88.8293103 | C  | -1.3060168 | -0.4738647 | 90.2358555 |
| H | 4.3481225  | 1.9763725 | 93.0515487 | C  | -2.1004973 | -1.4227703 | 90.9470733 |
| H | 7.6639305  | 7.2481479 | 88.1317253 | C  | -1.8195244 | 0.8179002  | 89.9265283 |
| H | 5.0623492  | 1.1427628 | 84.3965074 | H  | -2.8498001 | 1.0704657  | 90.2211389 |
| C | 7.2942160  | 3.8536935 | 88.8298843 | C  | -1.0284561 | 1.7795981  | 89.3167253 |
| C | 6.6507978  | 0.8101430 | 91.9530440 | C  | 4.6658241  | 0.4164132  | 88.6389195 |
| C | 7.1106115  | 6.2945991 | 88.2576730 | C  | 4.9715400  | -0.8442697 | 88.1348987 |
| H | 6.2699755  | 6.4943598 | 88.9541240 | H  | 6.0184348  | -1.1325635 | 87.9598255 |
| C | 6.6917517  | 3.3048900 | 89.9733861 | C  | 3.9486516  | -1.7670243 | 87.7574939 |
| C | 7.6416016  | 1.4478732 | 85.2870843 | C  | 4.2833208  | -2.9972442 | 87.1143936 |
| H | 9.2238756  | 4.8108677 | 90.6350484 | C  | 2.5546071  | -1.4322679 | 87.9431076 |
| C | 7.1928789  | 3.1259983 | 87.6309516 | C  | 1.5676682  | -2.2978230 | 87.3893291 |
| C | 8.5858971  | 5.6044223 | 90.1961757 | C  | 2.2275313  | -0.2256109 | 88.6632246 |
| H | 9.1988623  | 6.5233395 | 90.1003428 | C  | 3.2837234  | 0.6324599  | 88.9609377 |
| H | 7.7032598  | 3.5238636 | 86.7406476 | O  | 0.9455665  | 2.4185281  | 88.2114509 |
| C | 4.7628222  | 2.4977545 | 92.1647523 | O  | 2.9734400  | 1.8201590  | 89.6038099 |
| H | 6.3126589  | 0.3114277 | 92.8851589 | P  | 2.4348355  | 2.9813143  | 88.5867798 |
| H | 7.1262729  | 0.0462639 | 91.3051200 | O  | 2.4431383  | 4.2597969  | 89.4459894 |
| C | 5.9563820  | 2.1033403 | 89.9241418 | O  | 3.1999884  | 3.0344279  | 87.2679233 |
| C | 5.1211595  | 1.6551412 | 85.3779256 | C  | -1.5742436 | -2.6429245 | 91.3425941 |
| C | 6.4594839  | 1.9338780 | 87.5176520 | C  | -0.2177855 | -2.9471133 | 91.0543179 |
| H | 8.5692449  | 1.2061309 | 85.8441420 | H  | -3.1398305 | -1.1542625 | 91.1935644 |
| H | 7.7319911  | 2.4889046 | 84.9132495 | H  | -2.1953892 | -3.3631891 | 91.8964791 |
| C | 5.4671812  | 1.4939971 | 91.2379702 | H  | 1.6232482  | -2.3058715 | 90.1473702 |
| C | 5.7756171  | 1.4416745 | 88.6751480 | H  | 0.2161954  | -3.8968547 | 91.4026488 |
| C | 6.3860148  | 1.2465589 | 86.1496027 | C  | 1.9290223  | -3.4709856 | 86.7408655 |
| H | 3.9266450  | 3.0062131 | 91.6475309 | C  | 3.2959910  | -3.8371902 | 86.6205411 |
| H | 4.2064959  | 1.3945499 | 85.9413958 | H  | 0.5083974  | -2.0173388 | 87.4712602 |
| H | 5.4538498  | 3.2800810 | 92.5401554 | H  | 1.1497011  | -4.1190089 | 86.3117307 |
| H | 6.6765367  | 6.0082540 | 87.2792329 | H  | 3.5703023  | -4.7757690 | 86.1152698 |
| H | 5.1246385  | 2.7531807 | 85.1921638 | H  | 5.3475052  | -3.2537932 | 86.9920072 |
| H | 7.7712503  | 5.8317835 | 90.9146891 | C  | -1.3512003 | 4.1194492  | 90.1934666 |
| H | 4.7381993  | 0.6945405 | 90.9952285 | C  | -1.4951106 | 3.1917345  | 89.1247289 |
| H | 6.3025964  | 0.1572296 | 86.3267099 | C  | -1.8541666 | 5.4226431  | 90.0244140 |
| H | 6.8061059  | 3.8130020 | 90.9413920 | C  | -2.0524485 | 3.6067716  | 87.8889054 |
|   |            |           |            | C  | -2.5540965 | 4.9183882  | 87.7745182 |
|   |            |           |            | C  | -2.4824334 | 5.8386160  | 88.8343770 |
|   |            |           |            | H  | -1.7546987 | 6.1466998  | 90.8493932 |
|   |            |           |            | C  | -2.1160113 | 2.6674499  | 86.6879498 |
|   |            |           |            | H  | -3.0090604 | 5.2262767  | 86.8211869 |
|   |            |           |            | C  | -1.5297783 | 3.3128386  | 85.4215955 |
|   |            |           |            | H  | -2.1331347 | 4.1777548  | 85.0740922 |
|   |            |           |            | H  | -1.4804725 | 2.5757394  | 84.5958839 |
|   |            |           |            | H  | -0.4934319 | 3.6638450  | 85.6038146 |
|   |            |           |            | C  | -3.5496243 | 2.1566399  | 86.4562693 |
|   |            |           |            | H  | -1.4835124 | 1.7848605  | 86.9156698 |
|   |            |           |            | H  | -4.2416460 | 2.9946355  | 86.2276537 |
|   |            |           |            | H  | -3.9384827 | 1.6349903  | 87.3545669 |
|   |            |           |            | H  | -3.5827375 | 1.4458987  | 85.6048166 |
|   |            |           |            | C  | -3.0884609 | 7.2361724  | 88.7493975 |
|   |            |           |            | C  | -3.0776172 | 7.8428213  | 87.3391035 |
|   |            |           |            | H  | -3.4280855 | 8.8943274  | 87.3667998 |
|   |            |           |            | H  | -3.7526235 | 7.2939492  | 86.6500419 |
|   |            |           |            | H  | -2.0634006 | 7.8355175  | 86.8903306 |
|   |            |           |            | C  | -4.5175588 | 7.2272024  | 89.3294572 |
|   |            |           |            | H  | -2.4697586 | 7.8909091  | 89.4037216 |

### 13j-mod-mi; COSMO

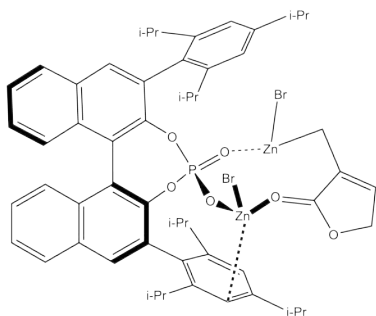

Energy (Hartree) = -11625.09029917

|    |           |           |            |
|----|-----------|-----------|------------|
| Zn | 4.2206298 | 5.2199534 | 89.4698913 |
| Br | 4.5555618 | 6.7233250 | 91.2203053 |
| C  | 0.7782082 | 6.3277553 | 86.2187954 |
| C  | 2.0298367 | 5.8174067 | 85.9917786 |
| C  | 2.8000580 | 6.1409588 | 87.2138186 |

|   |            |           |            |    |            |            |            |
|---|------------|-----------|------------|----|------------|------------|------------|
| H | -4.9524569 | 8.2483024 | 89.3354473 | C  | 2.7795330  | 6.1605283  | 87.2393942 |
| H | -4.5280121 | 6.8407742 | 90.3682941 | O  | 2.0286360  | 6.8547904  | 88.1097144 |
| H | -5.1795599 | 6.5752409 | 88.7216530 | C  | 0.6895354  | 6.9537095  | 87.5959432 |
| C | -0.6767543 | 3.7232969 | 91.5066688 | O  | 3.9492097  | 5.8443144  | 87.5358138 |
| C | 0.3034075  | 4.7885984 | 92.0266385 | C  | 2.5603383  | 5.0227422  | 84.9152828 |
| H | 0.8554080  | 4.3994263 | 92.9068600 | H  | 0.3926883  | 8.0254705  | 87.6014149 |
| H | -0.2191723 | 5.7114478 | 92.3541086 | H  | 0.0155779  | 6.4087167  | 88.2974694 |
| H | 1.0482237  | 5.0587022 | 91.2535108 | Zn | 2.3410268  | 3.0828573  | 85.4278822 |
| C | -1.7282416 | 3.3622087 | 92.5733573 | Br | 1.3771247  | 1.0277069  | 84.9091155 |
| H | -0.0823502 | 2.8066896 | 91.3061644 | H  | 3.6495661  | 5.1924990  | 84.7991318 |
| H | -1.2388752 | 3.0415351 | 93.5163195 | H  | 2.0433447  | 5.2199301  | 83.9571817 |
| H | -2.3883066 | 2.5391270 | 92.2334736 | H  | -0.1200365 | 6.2270741  | 85.5902434 |
| H | -2.3719065 | 4.2374721 | 92.8030594 | C  | 0.2993036  | 1.4289959  | 88.9100788 |
| H | 8.5745253  | 5.2173621 | 87.9928391 | C  | 0.8564658  | 0.1548057  | 89.1207100 |
| H | 7.2401201  | 2.2406385 | 92.1644975 | C  | 0.0599440  | -0.7897489 | 89.8793388 |
| H | 7.6583791  | 0.7962337 | 84.5793595 | C  | 0.5766198  | -2.0390438 | 90.3412135 |
| C | 7.6993134  | 5.4681835 | 88.6329706 | C  | -1.3005989 | -0.4577687 | 90.2320775 |
| H | 4.1705627  | 2.3084770 | 93.0843938 | C  | -2.0970120 | -1.4078434 | 90.9384745 |
| H | 7.6630167  | 7.4763049 | 87.7680257 | C  | -1.8122146 | 0.8339571  | 89.9214408 |
| H | 5.1265946  | 0.7883866 | 84.4621187 | H  | -2.8441286 | 1.0871138  | 90.2098766 |
| C | 6.8751394  | 4.1813388 | 88.6718348 | C  | -1.0191891 | 1.7967683  | 89.3163239 |
| C | 6.5642782  | 1.3826282 | 91.9665136 | C  | 4.6760548  | 0.4142237  | 88.6410873 |
| C | 6.9645313  | 6.6319899 | 87.9386049 | C  | 4.9721525  | -0.8486606 | 88.1373159 |
| H | 6.1349498  | 7.0113054 | 88.5706104 | H  | 6.0178676  | -1.1426568 | 87.9637632 |
| C | 6.2246004  | 3.7034106 | 89.8384538 | C  | 3.9442003  | -1.7640819 | 87.7575666 |
| C | 7.5793749  | 1.5451870 | 85.3928451 | C  | 4.2691014  | -2.9956482 | 87.1131277 |
| H | 8.7796824  | 5.0741470 | 90.5112371 | C  | 2.5530391  | -1.4187641 | 87.9425858 |
| C | 6.8561500  | 3.3438183 | 87.5435740 | C  | 1.5599316  | -2.2748255 | 87.3856961 |
| C | 8.2346282  | 5.8973143 | 90.0061513 | C  | 2.2345031  | -0.2114905 | 88.6656345 |
| H | 8.9339168  | 6.7497392 | 89.8909103 | C  | 3.2957418  | 0.6401778  | 88.9635981 |
| H | 7.3819014  | 3.6901700 | 86.6420571 | O  | 0.9614721  | 2.4403565  | 88.2271437 |
| C | 4.4704085  | 2.8125576 | 92.1434811 | O  | 2.9938018  | 1.8281830  | 89.6109967 |
| H | 6.3236708  | 0.9082828 | 92.9401290 | P  | 2.4536128  | 2.9962662  | 88.6041119 |
| H | 7.1210559  | 0.6467410 | 91.3518105 | O  | 2.4532865  | 4.2687020  | 89.4734794 |
| C | 5.6425573  | 2.4046342 | 89.8889672 | O  | 3.2143360  | 3.0640357  | 87.2839478 |
| C | 5.0549423  | 1.4019040 | 85.3827505 | C  | -1.5731303 | -2.6290120 | 91.3319833 |
| C | 6.2450901  | 2.0779217 | 87.5260287 | C  | -0.2167471 | -2.9332777 | 91.0463906 |
| H | 8.5078317  | 1.4944510 | 85.9969492 | H  | -3.1368162 | -1.1391920 | 91.1827309 |
| H | 7.5403353  | 2.5424129 | 84.9074370 | H  | -2.1964150 | -3.3501862 | 91.8821342 |
| C | 5.2708232  | 1.8436274 | 91.2598623 | H  | 1.6270636  | -2.2905195 | 90.1457819 |
| C | 5.5795364  | 1.6088116 | 88.7088900 | H  | 0.2156130  | -3.8843791 | 91.3927993 |
| C | 6.3263479  | 1.2573306 | 86.2350812 | C  | 1.9126170  | -3.4492795 | 86.7357432 |
| H | 3.5499239  | 3.1578841 | 91.6342851 | C  | 3.2760957  | -3.8264965 | 86.6168483 |
| H | 4.1552584  | 1.0743946 | 85.9345056 | H  | 0.5034376  | -1.9841568 | 87.4658315 |
| H | 5.0578970  | 3.7097432 | 92.4278050 | H  | 1.1286062  | -4.0890601 | 86.3031120 |
| H | 6.5337019  | 6.3271131 | 86.9653512 | H  | 3.5436075  | -4.7659974 | 86.1098171 |
| H | 4.9182279  | 2.4622843 | 85.0746283 | H  | 5.3313188  | -3.2604021 | 86.9909652 |
| H | 7.4137018  | 6.2341610 | 90.6722330 | C  | -1.3599181 | 4.1381574  | 90.1833004 |
| H | 4.6530715  | 0.9377097 | 91.1018337 | C  | -1.4930111 | 3.2055132  | 89.1178833 |
| H | 6.3885830  | 0.1925723 | 86.5270727 | C  | -1.8802235 | 5.4339219  | 90.0102080 |
| H | 6.3638967  | 4.2449680 | 90.7864579 | C  | -2.0550510 | 3.6091270  | 87.8804412 |
|   |            |           |            | C  | -2.5734838 | 4.9136952  | 87.7623839 |
|   |            |           |            | C  | -2.5145823 | 5.8375341  | 88.8195391 |
|   |            |           |            | H  | -1.7896914 | 6.1612856  | 90.8333129 |
|   |            |           |            | C  | -2.1079219 | 2.6639838  | 86.6835058 |
|   |            |           |            | H  | -3.0333984 | 5.2118236  | 86.8082939 |
|   |            |           |            | C  | -1.5407456 | 3.3129594  | 85.4105904 |
|   |            |           |            | H  | -2.1638163 | 4.1622203  | 85.0584821 |
|   |            |           |            | H  | -1.4767223 | 2.5713321  | 84.5902803 |
|   |            |           |            | H  | -0.5109912 | 3.6857217  | 85.5862590 |
|   |            |           |            | C  | -3.5329531 | 2.1256354  | 86.4628811 |
|   |            |           |            | H  | -1.4575088 | 1.7942958  | 86.9100731 |
|   |            |           |            | H  | -4.2427272 | 2.9490603  | 86.2359620 |
|   |            |           |            | H  | -3.9063708 | 1.6001848  | 87.3652723 |
|   |            |           |            | H  | -3.5577994 | 1.4111151  | 85.6145551 |
|   |            |           |            | C  | -3.1415427 | 7.2255307  | 88.7307563 |
|   |            |           |            | C  | -3.1205242 | 7.8370921  | 87.3226154 |
|   |            |           |            | H  | -3.4875334 | 8.8830186  | 87.3468907 |
|   |            |           |            | H  | -3.7774790 | 7.2805094  | 86.6225069 |
|   |            |           |            | H  | -2.1002839 | 7.8458364  | 86.8875763 |
|   |            |           |            | C  | -4.5777815 | 7.1926201  | 89.2913319 |

### 13j-mod-mi

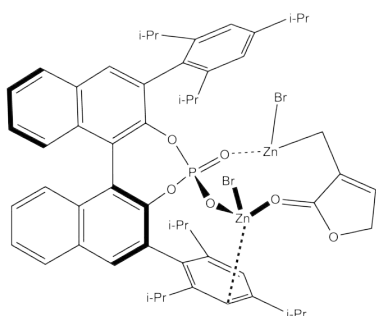

Energy (Hartree)= -11625.08021221

|    |           |           |            |
|----|-----------|-----------|------------|
| Zn | 4.1936107 | 5.2759319 | 89.5045774 |
| Br | 4.6443728 | 6.7033508 | 91.2712383 |
| C  | 0.7535222 | 6.3236383 | 86.2484759 |
| C  | 2.0114123 | 5.8303200 | 86.0166054 |

|   |            |           |            |    |            |            |            |
|---|------------|-----------|------------|----|------------|------------|------------|
| H | -2.5418605 | 7.8882542 | 89.3949780 | Zn | 0.7457337  | 0.6744614  | 2.4559060  |
| H | -5.0300727 | 8.2061214 | 89.2951398 | Br | 2.1157674  | 2.4478117  | 3.1053432  |
| H | -4.5958263 | 6.8016092 | 90.3281030 | H  | -1.9211287 | 4.5722224  | 0.0055792  |
| H | -5.2208113 | 6.5314954 | 88.6735243 | Br | -4.5142642 | 1.0025709  | -2.1538973 |
| C | -0.6792422 | 3.7548294 | 91.4969212 | H  | -4.9927774 | 0.8570844  | 1.3329843  |
| C | 0.2852575  | 4.8353144 | 92.0143183 | Zn | -3.2139984 | 0.1217995  | -0.3904645 |
| H | 0.8457642  | 4.4561256 | 92.8932378 | C  | -3.5169297 | 3.3625350  | 0.8956769  |
| H | -0.2499616 | 5.7502706 | 92.3434550 | C  | -2.3031975 | 4.2277424  | 0.9923273  |
| H | 1.0250400  | 5.1173114 | 91.2408984 | C  | -3.2243236 | 2.1136422  | 1.3790855  |
| C | -1.7248496 | 3.3803298 | 92.5646207 | C  | -3.8912099 | 0.8107865  | 1.3970076  |
| H | -0.0717863 | 2.8465391 | 91.2977096 | C  | -1.8103389 | 2.1762094  | 1.7798926  |
| H | -1.2305850 | 3.0702177 | 93.5083797 | O  | -1.2797798 | 3.3852721  | 1.5795546  |
| H | -2.3715888 | 2.5457315 | 92.2278118 | O  | -1.1670541 | 1.2145754  | 2.2334773  |
| H | -2.3825502 | 4.2455177 | 92.7922015 | H  | -2.4172765 | 5.1229574  | 1.6419383  |
| H | 8.6006197  | 5.2016106 | 87.9724996 | H  | -3.5438628 | 0.1826866  | 2.2363706  |
| H | 7.2737579  | 2.2039390 | 92.1684750 | H  | -4.4625852 | 3.6940135  | 0.4475548  |
| H | 7.6430681  | 0.7773614 | 84.5635583 | C  | 0.1555856  | -3.6470867 | 1.0009248  |
| C | 7.7351482  | 5.4458683 | 88.6287669 | C  | 0.6938609  | -4.4843367 | 0.0227180  |
| H | 4.2070809  | 2.2971938 | 93.0904004 | C  | 1.5803285  | -5.5457932 | 0.4551788  |
| H | 7.6754214  | 7.4591391 | 87.7736790 | C  | 2.3365377  | -6.3500318 | -0.4503063 |
| H | 5.1065416  | 0.8074584 | 84.4583818 | C  | 1.7393825  | -5.7930900 | 1.8690939  |
| C | 6.9134274  | 4.1577179 | 88.6743448 | C  | 2.5595905  | -6.8763957 | 2.3063421  |
| C | 6.5900546  | 1.3527610 | 91.9684161 | C  | 1.1449892  | -4.9037400 | 2.8095380  |
| C | 6.9839379  | 6.6111064 | 87.9547247 | H  | 1.3267402  | -5.0658703 | 3.8832642  |
| H | 6.1680428  | 6.9864647 | 88.6065543 | C  | 0.4190026  | -3.7943964 | 2.3988757  |
| C | 6.2721102  | 3.6795714 | 89.8430102 | C  | 0.7123320  | -2.7683130 | -3.4067775 |
| C | 7.5766332  | 1.5227076 | 85.3814866 | C  | 0.4842548  | -3.8640337 | -4.2334862 |
| H | 8.8457932  | 5.0444559 | 90.4873668 | H  | 0.5799691  | -3.7386917 | -5.3231964 |
| C | 6.8834869  | 3.3234152 | 87.5438371 | C  | 0.0758822  | -5.1264153 | -3.7199188 |
| C | 8.2918365  | 5.8694334 | 89.9951539 | C  | -0.2950316 | -6.1987744 | -4.5861260 |
| H | 8.9883287  | 6.7233797 | 89.8740582 | C  | 0.0164237  | -5.3185518 | -2.2927144 |
| H | 7.4054743  | 3.6696757 | 86.6399049 | C  | -0.4681808 | -6.5667684 | -1.7981812 |
| C | 4.5091750  | 2.8003445 | 92.1496536 | C  | 0.4229847  | -4.2420222 | -1.4201863 |
| H | 6.3468808  | 0.8776377 | 92.9410616 | C  | 0.6322290  | -2.9761261 | -1.9915035 |
| H | 7.1408544  | 0.6144138 | 91.3514293 | O  | -0.7249759 | -2.6388000 | 0.6225840  |
| C | 5.6774332  | 2.3892441 | 89.8928015 | O  | 0.9086691  | -1.8768904 | -1.1868850 |
| C | 5.0502502  | 1.4145116 | 85.3842814 | P  | -0.1441246 | -1.2636216 | -0.0808490 |
| C | 6.2623401  | 2.0630118 | 87.5249276 | O  | 0.7779771  | -0.4761123 | 0.8607503  |
| H | 8.5075848  | 1.4587126 | 85.9803837 | O  | -1.3643871 | -0.5880336 | -0.7102577 |
| H | 7.5482540  | 2.5221462 | 84.8998579 | C  | 3.2428674  | -7.6664633 | 1.3945244  |
| C | 5.3013542  | 1.8276360 | 91.2628364 | C  | 3.1450263  | -7.3823717 | 0.0067789  |
| C | 5.6009419  | 1.5972481 | 88.7105555 | H  | 2.6556969  | -7.0581774 | 3.3883764  |
| C | 6.3239167  | 1.2481804 | 86.2286837 | H  | 3.8772022  | -8.4953467 | 1.7436674  |
| C | 3.5897208  | 3.1526994 | 91.6436689 | H  | 2.2845415  | -6.1421182 | -1.5270478 |
| H | 4.1495370  | 1.0927876 | 85.9376693 | H  | 3.7195810  | -7.9817310 | -0.7158263 |
| H | 5.1012441  | 3.6942010 | 92.4344815 | C  | -0.8447910 | -7.5827592 | -2.6660715 |
| H | 6.5331956  | 6.3109581 | 86.9889768 | C  | -0.7445909 | -7.4061061 | -4.0723794 |
| H | 4.9235201  | 2.4790621 | 85.0870558 | H  | -0.5578656 | -6.7138636 | -0.7125206 |
| H | 7.4811707  | 6.2026285 | 90.6752443 | H  | -1.2304419 | -8.5304224 | -2.2601082 |
| H | 4.6755549  | 0.9275240 | 91.1018867 | H  | -1.0394221 | -8.2214550 | -4.7503543 |
| H | 6.3723467  | 0.1807172 | 86.5138347 | H  | -0.2357972 | -6.0397008 | -5.6743189 |
| H | 6.4007919  | 4.2299590 | 90.7868810 | C  | 1.0532288  | -1.8107794 | 3.8002101  |
|   |            |           |            | C  | 0.0328015  | -2.6751721 | 3.3073623  |
|   |            |           |            | C  | 0.6607947  | -0.6279275 | 4.4802331  |
|   |            |           |            | C  | -1.3325734 | -2.3986157 | 3.5776761  |
|   |            |           |            | C  | -1.6729542 | -1.2375120 | 4.2994264  |
|   |            |           |            | C  | -0.7038094 | -0.3290701 | 4.7487718  |
|   |            |           |            | H  | 1.4376634  | 0.0087995  | 4.9357990  |
|   |            |           |            | C  | -2.4236783 | -3.3749188 | 3.1489683  |
|   |            |           |            | H  | -2.7340251 | -1.0359334 | 4.5037814  |
|   |            |           |            | C  | -3.5561331 | -2.7124307 | 2.3503174  |
|   |            |           |            | H  | -4.1438643 | -2.0033583 | 2.9688817  |
|   |            |           |            | H  | -4.2602700 | -3.4819430 | 1.9740862  |
|   |            |           |            | H  | -3.1562288 | -2.1581526 | 1.4788834  |
|   |            |           |            | C  | -2.9621362 | -4.1351427 | 4.3766451  |
|   |            |           |            | H  | -1.9500629 | -4.1263563 | 2.4855256  |
|   |            |           |            | H  | -3.4489092 | -3.4441422 | 5.0962584  |
|   |            |           |            | H  | -2.1473530 | -4.6630519 | 4.9123442  |
|   |            |           |            | H  | -3.7154598 | -4.8884060 | 4.0671296  |
|   |            |           |            | C  | -1.0440516 | 0.9266685  | 5.5410482  |
|   |            |           |            | C  | -2.4983098 | 1.3886401  | 5.3908120  |

## 7.4 Agglomeration to Complexes 13

### 7.4.1 Pathways starting from 13j-ma

TS-7-d-ma; COSMO

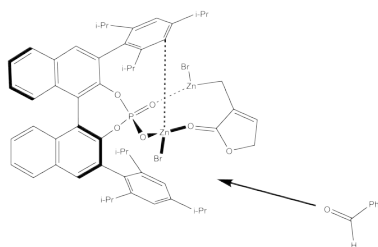

Energy (Hartree) = -11969.99527747

|   |            |            |            |
|---|------------|------------|------------|
| H | -2.6369030 | 2.3759191  | 5.8743684  |
| H | -3.2045957 | 0.6845869  | 5.8785368  |
| H | -2.7936608 | 1.4817407  | 4.3278321  |
| C | -0.6843602 | 0.7306967  | 7.0286415  |
| H | -0.3829509 | 1.7293887  | 5.1404613  |
| H | -0.8655451 | 1.6647321  | 7.5985501  |
| H | 0.3793310  | 0.4502903  | 7.1633789  |
| H | -1.3069983 | -0.0713204 | 7.4776523  |
| C | 2.5384126  | -2.1564642 | 3.7012613  |
| C | 3.4143944  | -1.0412025 | 3.1138325  |
| H | 4.4667304  | -1.3846267 | 3.0475819  |
| H | 3.4077450  | -0.1165821 | 3.7255475  |
| H | 3.0887457  | -0.7775078 | 2.0863126  |
| C | 3.0473854  | -2.6018023 | 5.0878171  |
| H | 2.6322407  | -3.0236350 | 3.0205810  |
| H | 4.1020070  | -2.9391732 | 5.0235873  |
| H | 2.4428609  | -3.4369603 | 5.4968054  |
| H | 3.0024564  | -1.7674084 | 5.8186553  |
| H | 0.7467112  | 3.0187759  | -5.7871450 |
| H | 4.9621940  | -0.9062793 | -4.4275329 |
| H | -2.5140551 | -1.9855794 | -6.8178546 |
| C | 1.7094406  | 2.6653539  | -5.3564296 |
| H | 4.7265452  | -1.3195243 | -1.2647604 |
| H | 2.1488052  | 4.6523302  | -4.5367107 |
| H | -3.4490697 | -1.1016648 | -4.5636287 |
| C | 1.4795733  | 1.2338557  | -4.8885285 |
| C | 4.5161742  | -1.8313361 | -4.0055186 |
| C | 2.0672319  | 3.6018160  | -4.1888839 |
| H | 3.0411307  | 3.3277641  | -3.7319103 |
| C | 2.4620000  | 0.5301932  | -4.1671983 |
| C | -1.5473479 | -1.4856484 | -6.6008261 |
| H | 2.4829716  | 2.0891416  | -7.3331590 |
| C | 0.2793485  | 0.5676659  | -5.1777706 |
| C | 2.7672655  | 2.7291700  | -6.4735045 |
| H | 2.8912187  | 3.7684741  | -6.8430011 |
| H | -0.4944718 | 1.1014208  | -5.7537904 |
| C | 3.9416231  | -0.7283413 | -1.7804983 |
| H | 5.3307768  | -2.4095302 | -3.5216702 |
| H | 4.1252509  | -2.4303215 | -4.8533969 |
| C | 2.2526724  | -0.7773611 | -3.6980436 |
| C | -2.4694225 | -0.6112701 | -4.3902533 |
| C | 0.0192041  | -0.7461067 | -4.7413780 |
| H | -0.7397402 | -2.0740636 | -7.0837008 |
| H | -1.5722500 | -0.4890163 | -7.0888827 |
| C | 3.3997607  | -1.5018519 | -2.9945960 |
| C | 1.0051016  | -1.4127679 | -3.9620381 |
| C | -1.3318152 | -1.3702660 | -5.0821380 |
| H | 3.1344845  | -0.5173226 | -1.0518184 |
| H | -2.3044471 | -0.5667550 | -3.2974135 |
| H | 4.4010891  | 0.2368887  | -2.0794983 |
| H | 1.2996480  | 3.5615378  | -3.3898430 |
| H | -2.5554634 | 0.4361916  | -4.7451418 |
| H | 3.7561131  | 2.3814051  | -6.1073178 |
| H | 3.0133365  | -2.4712623 | -2.6200671 |
| H | -1.3475469 | -2.3989040 | -4.6737116 |
| H | 3.4283148  | 1.0175214  | -3.9604660 |
| C | -0.4122251 | 12.0313469 | -0.5590679 |
| C | 0.3456341  | 10.8753538 | -0.3453092 |
| C | 1.7276028  | 10.8733210 | -0.6384092 |
| C | 2.3407409  | 12.0379794 | -1.1458850 |
| C | 1.5795864  | 13.1963648 | -1.3603586 |
| C | 0.2046400  | 13.1918556 | -1.0670091 |
| H | -1.4893179 | 12.0363957 | -0.3316254 |
| H | -0.1038053 | 9.9513014  | 0.0500547  |
| C | 2.5315908  | 9.6456151  | -0.4135203 |
| H | 3.4199166  | 12.0282441 | -1.3718103 |
| H | 2.0556071  | 14.1061015 | -1.7569614 |
| H | -0.3938876 | 14.1006793 | -1.2352083 |
| O | 2.0856274  | 8.5916635  | 0.0159892  |
| H | 3.6270357  | 9.7514968  | -0.6758262 |

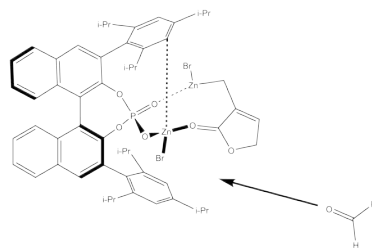

Energy (Hartree) = -11969.97711671  
number of imaginary frequencies: 6

|    |            |            |            |
|----|------------|------------|------------|
| Zn | 0.7562891  | 0.6845488  | 2.4455502  |
| Br | 2.1141176  | 2.4436229  | 3.1121336  |
| H  | -1.9199999 | 4.5716206  | 0.0059057  |
| Br | -4.5157237 | 0.9963190  | -2.1490658 |
| H  | -4.9920361 | 0.8544909  | 1.3308191  |
| Zn | -3.2128470 | 0.1438699  | -0.4021592 |
| C  | -3.5189409 | 3.3617938  | 0.8965309  |
| C  | -2.3028119 | 4.2255991  | 0.9923555  |
| C  | -3.2266059 | 2.1129349  | 1.3815315  |
| C  | -3.8909978 | 0.8113077  | 1.3998960  |
| C  | -1.8110544 | 2.1750994  | 1.7808941  |
| O  | -1.2803886 | 3.3848664  | 1.5783453  |
| O  | -1.1672943 | 1.2145072  | 2.2327622  |
| H  | -2.4146176 | 5.1218127  | 1.6421665  |
| H  | -3.5412838 | 0.1817151  | 2.2368062  |
| H  | -4.4640537 | 3.6892321  | 0.4447318  |
| C  | 0.1556021  | -3.6468721 | 1.0005720  |
| C  | 0.6941299  | -4.4845776 | 0.0225069  |
| C  | 1.5805045  | -5.5458888 | 0.4554782  |
| C  | 2.3365890  | -6.3503259 | -0.4496734 |
| C  | 1.7396198  | -5.7933064 | 1.8692331  |
| C  | 2.5596238  | -6.8764098 | 2.3058207  |
| C  | 1.1449596  | -4.9039066 | 2.8090085  |
| H  | 1.3268436  | -5.0648343 | 3.8829483  |
| C  | 0.4192851  | -3.7944272 | 2.3987448  |
| C  | 0.7129127  | -2.7680174 | -3.4069284 |
| C  | 0.4846521  | -3.8642190 | -4.2327855 |
| H  | 0.5800031  | -3.7374214 | -5.3223517 |
| C  | 0.0760578  | -5.1265352 | -3.7198345 |
| C  | -0.2952124 | -6.1988993 | -4.5851614 |
| C  | 0.0169671  | -5.3188765 | -2.2928313 |
| C  | -0.4678608 | -6.5668587 | -1.7986792 |
| C  | 0.4235351  | -4.2423777 | -1.4204893 |
| C  | 0.6321624  | -2.9761830 | -1.9916243 |
| O  | -0.7242708 | -2.6394432 | 0.6241377  |
| O  | 0.9068472  | -1.8772297 | -1.1867316 |
| P  | -0.1461104 | -1.2630412 | -0.0815046 |
| O  | 0.7760198  | -0.4752365 | 0.8594422  |
| O  | -1.3699679 | -0.5901039 | -0.7043730 |
| C  | 3.2427127  | -7.6663854 | 1.3946328  |
| C  | 3.1446445  | -7.3824176 | 0.0074554  |
| H  | 2.6556975  | -7.0579501 | 3.3879279  |
| H  | 3.8769551  | -8.4951644 | 1.7440551  |
| H  | 2.2833298  | -6.1419469 | -1.5261814 |
| H  | 3.7189837  | -7.9818208 | -0.7151951 |
| C  | -0.8446409 | -7.5825029 | -2.6662515 |
| C  | -0.7446894 | -7.4059127 | -4.0719629 |
| H  | -0.5570278 | -6.7130628 | -0.7129409 |
| H  | -1.2306739 | -8.5298908 | -2.2601379 |
| H  | -1.0399261 | -8.2209138 | -4.7500962 |
| H  | -0.2365507 | -6.0394195 | -5.6732961 |
| C  | 1.0527673  | -1.8114797 | 3.8024081  |
| C  | 0.0328451  | -2.6756708 | 3.3078548  |
| C  | 0.6602722  | -0.6311669 | 4.4849418  |
| C  | -1.3323630 | -2.3988316 | 3.5775018  |
| C  | -1.6725380 | -1.2380677 | 4.2992270  |

TS-7-d-ma

|   |            |            |            |
|---|------------|------------|------------|
| C | -0.7035294 | -0.3305320 | 4.7503160  |
| H | 1.4368759  | 0.0109567  | 4.9329911  |
| C | -2.4236984 | -3.3749411 | 3.1485598  |
| H | -2.7337598 | -1.0354404 | 4.5018260  |
| C | -3.5560906 | -2.7127264 | 2.3499653  |
| H | -4.1444976 | -2.0036124 | 2.9679043  |
| H | -4.2608342 | -3.4814285 | 1.9733147  |
| H | -3.1557343 | -2.1584977 | 1.4789937  |
| C | -2.9618349 | -4.1355856 | 4.3758348  |
| H | -1.9495822 | -4.1256525 | 2.4846305  |
| H | -3.4482446 | -3.4452082 | 5.0962520  |
| H | -2.1471372 | -4.6629874 | 4.9119036  |
| H | -3.7154855 | -4.8891100 | 4.0678257  |
| C | -1.0436797 | 0.9264526  | 5.5408676  |
| C | -2.4978842 | 1.3886334  | 5.3901200  |
| H | -2.6377229 | 2.3755588  | 5.8741668  |
| H | -3.2049605 | 0.6853656  | 5.8780940  |
| H | -2.7939800 | 1.4819495  | 4.3274511  |
| C | -0.6852897 | 0.7311100  | 7.0285632  |
| H | -0.3820944 | 1.7283517  | 5.1390802  |
| H | -0.8661190 | 1.6643763  | 7.5997822  |
| H | 0.3780326  | 0.4502222  | 7.1639654  |
| H | -1.3074336 | -0.0713499 | 7.4774681  |
| C | 2.5383026  | -2.1561587 | 3.7017575  |
| C | 3.4145734  | -1.0407001 | 3.1150579  |
| H | 4.4669929  | -1.3840452 | 3.0488637  |
| H | 3.4082601  | -0.1145409 | 3.7244348  |
| H | 3.0905258  | -0.7764740 | 2.0874235  |
| C | 3.0472240  | -2.6023748 | 5.0877886  |
| H | 2.6314217  | -3.0231371 | 3.0205901  |
| H | 4.1019406  | -2.9396798 | 5.0251706  |
| H | 2.4423087  | -3.4370736 | 5.4972029  |
| H | 3.0020519  | -1.7686818 | 5.8193246  |
| H | 0.7462975  | 3.0182527  | -5.7863630 |
| H | 4.9621948  | -0.9069149 | -4.4288539 |
| H | -2.5140870 | -1.9855121 | -6.8177029 |
| C | 1.7094126  | 2.6648253  | -5.3560993 |
| H | 4.7274875  | -1.3196018 | -1.2654277 |
| H | 2.1489129  | 4.6523589  | -4.5360147 |
| H | -3.4495292 | -1.1007524 | -4.5623408 |
| C | 1.4796601  | 1.2331433  | -4.8886875 |
| C | 4.5162439  | -1.8315933 | -4.0062248 |
| C | 2.0670371  | 3.6016019  | -4.1890131 |
| H | 3.0406267  | 3.3280744  | -3.7314205 |
| C | 2.4618838  | 0.5297493  | -4.1677471 |
| C | -1.5471524 | -1.4863487 | -6.6003777 |
| H | 2.4827125  | 2.0891495  | -7.3329849 |
| C | 0.2799532  | 0.5670089  | -5.1776473 |
| C | 2.7664150  | 2.7295426  | -6.4736851 |
| H | 2.8910004  | 3.7687584  | -6.8432477 |
| H | -0.4946886 | 1.1008284  | -5.7522946 |
| C | 3.9420682  | -0.7289795 | -1.7810062 |
| H | 5.3314413  | -2.4095697 | -3.5231307 |
| H | 4.1253300  | -2.4297424 | -4.8544614 |
| C | 2.2529851  | -0.7774183 | -3.6985959 |
| C | -2.4695678 | -0.6110386 | -4.3903666 |
| C | 0.0195546  | -0.7465437 | -4.7419357 |
| H | -0.7394909 | -2.0738819 | -7.0842231 |
| H | -1.5719293 | -0.4902498 | -7.0892389 |
| C | 3.4001310  | -1.5018800 | -2.9952565 |
| C | 1.0056266  | -1.4127411 | -3.9626888 |
| C | -1.3318601 | -1.3701741 | -5.0817984 |
| H | 3.1356344  | -0.5165906 | -1.0522186 |
| H | -2.3047635 | -0.5660993 | -3.2977455 |
| H | 4.4013241  | 0.2365271  | -2.0790037 |
| H | 1.3005670  | 3.5606592  | -3.3893636 |
| H | -2.5566824 | 0.4364428  | -4.7443480 |
| H | 3.7553709  | 2.3814579  | -6.1084690 |
| H | 3.0137307  | -2.4715138 | -2.6210188 |
| H | -1.3477816 | -2.3988479 | -4.6732181 |
| H | 3.4278148  | 1.0173089  | -3.9601570 |

|   |            |            |            |
|---|------------|------------|------------|
| C | -0.4113515 | 12.0315519 | -0.5592879 |
| C | 0.3467773  | 10.8760713 | -0.3455953 |
| C | 1.7279680  | 10.8742785 | -0.6386051 |
| C | 2.3394789  | 12.0386251 | -1.1457951 |
| C | 1.5786285  | 13.1967725 | -1.3603983 |
| C | 0.2043243  | 13.1920241 | -1.0670973 |
| H | -1.4884799 | 12.0363952 | -0.3317902 |
| H | -0.0985267 | 9.9499870  | 0.0497174  |
| C | 2.5309092  | 9.6432258  | -0.4124183 |
| H | 3.4188228  | 12.0282569 | -1.3715509 |
| H | 2.0544937  | 14.1065405 | -1.7570883 |
| H | -0.3944331 | 14.1006650 | -1.2352896 |
| O | 2.0837826  | 8.5927067  | 0.0158741  |
| H | 3.6282515  | 9.7502999  | -0.6753310 |

### TS-7-d-mi; COSMO

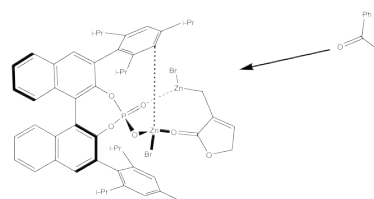

Energy (Hartree)= -11969.99213878

|    |            |            |            |
|----|------------|------------|------------|
| Zn | 2.8476744  | -0.3728417 | 0.2853597  |
| Br | 4.9119162  | -0.9540836 | 1.0857516  |
| H  | 4.3185421  | 3.8638152  | 3.4152745  |
| Br | -2.4413180 | 1.6004209  | 2.4540807  |
| H  | 0.0409569  | 4.8315682  | 1.2041700  |
| Zn | -0.7972464 | 2.3516425  | 0.9803326  |
| C  | 2.1915969  | 4.1236648  | 2.9440578  |
| C  | 3.3520556  | 3.3132923  | 3.4156003  |
| C  | 1.6664336  | 3.5645742  | 1.8103634  |
| C  | 0.5211047  | 3.8685398  | 0.9477859  |
| C  | 2.4781898  | 2.3564521  | 1.5725574  |
| O  | 3.4587701  | 2.2230715  | 2.4692795  |
| O  | 2.2749158  | 1.5151947  | 0.6750590  |
| H  | 3.2193491  | 2.8620355  | 4.4233736  |
| H  | 0.8144943  | 3.8644035  | -0.1216636 |
| H  | 1.8356011  | 5.0235631  | 3.4633695  |
| C  | -1.0179882 | -2.4075991 | -2.1135333 |
| C  | -1.4261190 | -2.2175604 | -3.4377784 |
| C  | -1.3721419 | -3.3589147 | -4.3253183 |
| C  | -1.5879731 | -3.2623536 | -5.7332217 |
| C  | -1.0549905 | -4.6571373 | -3.7767873 |
| C  | -1.0645781 | -5.7996947 | -4.6323877 |
| C  | -0.6565442 | -4.7699397 | -2.4130820 |
| H  | -0.3512986 | -5.7554292 | -2.0289119 |
| C  | -0.5581958 | -3.6569792 | -1.5889966 |
| C  | -1.3067570 | 1.5633655  | -4.1535654 |
| C  | -2.4065740 | 1.7099066  | -4.9923296 |
| H  | -2.6152548 | 2.6950511  | -5.4381790 |
| C  | -3.3179767 | 0.6420340  | -5.2300273 |
| C  | -4.5065494 | 0.8452201  | -5.9946695 |
| C  | -3.0711537 | -0.6506194 | -4.6371796 |
| C  | -4.0753077 | -1.6560560 | -4.7733917 |
| C  | -1.8427999 | -0.8654721 | -3.9074844 |
| C  | -1.0366561 | 0.2522917  | -3.6479205 |
| O  | -1.0826552 | -1.3408583 | -1.2234314 |
| O  | 0.1325889  | 0.0995260  | -2.9103895 |
| P  | 0.0476659  | -0.1538692 | -1.2893430 |
| O  | 1.4491393  | -0.7129803 | -0.9561869 |
| O  | -0.5147907 | 1.0175248  | -0.5126897 |
| C  | -1.3262109 | -5.6748126 | -5.9885638 |
| C  | -1.5665588 | -4.3899243 | -6.5434355 |
| H  | -0.8381882 | -6.7843516 | -4.1938494 |

|   |            |            |            |
|---|------------|------------|------------|
| H | -1.3255107 | -6.5634948 | -6.6379224 |
| H | -1.7661627 | -2.2761602 | -6.1824988 |
| H | -1.7326567 | -4.2838865 | -7.6263785 |
| C | -5.2334438 | -1.4191521 | -5.5013326 |
| C | -5.4452701 | -0.1657121 | -6.1356032 |
| H | -3.9300779 | -2.6273665 | -4.2808475 |
| H | -5.9964410 | -2.2084083 | -5.5813217 |
| H | -6.3625337 | 0.0069569  | -6.7188771 |
| H | -4.6737007 | 1.8329619  | -6.4524797 |
| C | 1.5685817  | -3.7569239 | -0.2596418 |
| C | 0.1460592  | -3.6511291 | -0.2696994 |
| C | 2.2464868  | -3.5459696 | 0.9549592  |
| C | -0.5580983 | -3.3846814 | 0.9330521  |
| C | 0.1684359  | -3.1870955 | 2.1234060  |
| C | 1.5719987  | -3.2480256 | 2.1581020  |
| H | 3.3449945  | -3.6228758 | 0.9742292  |
| C | -2.0836547 | -3.3578740 | 0.9712308  |
| H | -0.3886153 | -2.9765710 | 3.0480046  |
| C | -2.6448771 | -2.0790684 | 1.6103418  |
| H | -2.3779215 | -1.9965916 | 2.6842626  |
| H | -3.7525759 | -2.0680464 | 1.5491044  |
| H | -2.2688799 | -1.1691107 | 1.1060479  |
| C | -2.6193897 | -4.6232496 | 1.6700348  |
| H | -2.4427220 | -3.3914544 | -0.0784759 |
| H | -2.2972171 | -4.6591950 | 2.7320702  |
| H | -2.2529869 | -5.5462854 | 1.1758880  |
| H | -3.7289589 | -4.6398224 | 1.6540173  |
| C | 2.3814360  | -3.0672782 | 3.4387543  |
| C | 1.6407796  | -2.3085802 | 4.5467199  |
| H | 2.3217309  | -2.1104876 | 5.3989830  |
| H | 0.7836075  | -2.8921939 | 4.9436650  |
| H | 1.2469807  | -1.3350948 | 4.1888187  |
| C | 2.8903766  | -4.4309644 | 3.9492286  |
| H | 3.2762913  | -2.4671988 | 3.1562177  |
| H | 3.5464113  | -4.3024391 | 4.8350961  |
| H | 3.4703843  | -4.9655364 | 3.1703277  |
| C | 2.0403625  | -5.0826770 | 4.2422698  |
| C | 2.3751572  | -4.1164072 | -1.5086374 |
| C | 3.5706820  | -3.1871983 | -1.7705514 |
| H | 4.0934347  | -3.4906550 | -2.7007374 |
| H | 4.3164216  | -3.2066100 | -0.9503309 |
| H | 3.2320301  | -2.1404092 | -1.9042577 |
| C | 2.8250232  | -5.5892870 | -1.4377120 |
| H | 1.7029242  | -4.0193791 | -2.3835521 |
| H | 3.3545768  | -5.8851305 | -2.3671504 |
| H | 1.9620213  | -6.2722737 | -1.3013641 |
| H | 3.5164009  | -5.7532338 | -0.5845736 |
| H | 1.2853857  | 6.5334150  | -1.3495853 |
| H | 2.6544022  | 3.3223382  | -6.1408124 |
| H | -4.3721641 | 4.9604786  | -2.8092178 |
| C | 1.9251895  | 6.0020060  | -2.0883946 |
| H | 3.2581375  | 0.3964544  | -4.9762594 |
| H | 3.7219355  | 6.3587048  | -0.8852984 |
| H | -3.8937940 | 3.5477066  | -0.7686237 |
| C | 1.0886675  | 4.8583849  | -2.6500857 |
| C | 1.9305195  | 2.4919046  | -6.2792308 |
| C | 3.1790715  | 5.5077232  | -1.3457889 |
| H | 3.8858773  | 4.9977646  | -2.0328324 |
| C | 1.6576937  | 3.8693158  | -3.4712890 |
| C | -3.2830043 | 5.0111264  | -3.0142849 |
| H | 1.3917629  | 7.3988871  | -3.7036731 |
| C | -0.2885556 | 4.7741341  | -2.3884348 |
| C | 2.2957611  | 7.0077690  | -3.1948436 |
| H | 2.8579687  | 7.8688333  | -2.7773156 |
| H | -0.7495925 | 5.5459693  | -1.7501331 |
| C | 2.8374012  | 1.1706424  | -4.3020565 |
| H | 2.3829906  | 1.7632911  | -6.9835719 |
| H | 1.0229378  | 2.9141581  | -6.7565829 |
| C | 0.9036175  | 2.8077998  | -3.9999282 |
| C | -2.8152055 | 3.4970364  | -1.0215075 |
| C | -1.0945034 | 3.7330182  | -2.8896432 |

|   |            |            |            |
|---|------------|------------|------------|
| H | -3.1448177 | 5.1510215  | -4.1060960 |
| H | -2.8906274 | 5.9183665  | -2.5095123 |
| C | 1.5924304  | 1.8160819  | -4.9359678 |
| C | -0.4855334 | 2.7263017  | -3.6955906 |
| C | -2.5812552 | 3.7319593  | -2.5235945 |
| H | 2.5861441  | 0.6850833  | -3.3390320 |
| H | -2.4753416 | 2.4799926  | -0.7378614 |
| H | 3.6386247  | 1.9165131  | -4.1177268 |
| H | 2.9161734  | 4.7935872  | -0.5402583 |
| H | -2.2966494 | 4.2530334  | -0.3938339 |
| H | 2.9350511  | 6.5287680  | -3.9661345 |
| H | 0.8747228  | 1.0011942  | -5.1578356 |
| H | -3.0616453 | 2.8818987  | -3.0437473 |
| H | 2.7306165  | 3.9263097  | -3.7140027 |
| C | -3.6451898 | 0.4834836  | 11.9221010 |
| C | -3.2926365 | 0.7474695  | 10.5943154 |
| C | -2.3276991 | -0.0569269 | 9.9478203  |
| C | -1.7225395 | -1.1247900 | 10.6428059 |
| C | -2.0750116 | -1.3868353 | 11.9747462 |
| C | -3.0357124 | -0.5827570 | 12.6127596 |
| H | -4.3977079 | 1.1071827  | 12.4287353 |
| H | -3.7489754 | 1.5731073  | 10.0265533 |
| C | -1.9461976 | 0.2236259  | 8.5402429  |
| H | -0.9712608 | -1.7479188 | 10.1298929 |
| H | -1.6022108 | -2.2184145 | 12.5192179 |
| H | -3.3137969 | -0.7876674 | 13.6583501 |
| O | -2.3977776 | 1.1363753  | 7.8651797  |
| H | -1.1769112 | -0.4905337 | 8.1165414  |

### TS-7-d-mi

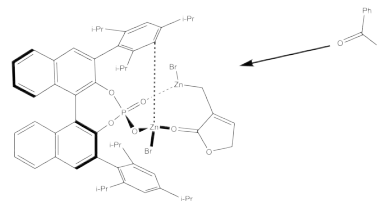

Energy (Hartree) = -11969.9769833  
 number of imaginary frequencies: 6

|    |            |            |            |
|----|------------|------------|------------|
| Zn | 2.8315455  | -0.4313330 | 0.3102224  |
| Br | 4.8924547  | -0.9750108 | 1.1385705  |
| H  | 4.3403050  | 3.8687729  | 3.4026841  |
| Br | -2.5135601 | 1.5553569  | 2.3975863  |
| H  | 0.0304452  | 4.7918029  | 1.2229897  |
| Zn | -0.8148835 | 2.3101968  | 1.0177201  |
| C  | 2.2067535  | 4.1244116  | 2.9457082  |
| C  | 3.3721201  | 3.3200292  | 3.4201260  |
| C  | 1.6654788  | 3.5415164  | 1.8312954  |
| C  | 0.5125406  | 3.8270287  | 0.9769539  |
| C  | 2.4778494  | 2.3278693  | 1.6044925  |
| O  | 3.4701227  | 2.2146947  | 2.4951588  |
| O  | 2.2697997  | 1.4729629  | 0.7255489  |
| H  | 3.2496845  | 2.8871773  | 4.4380828  |
| H  | 0.7945551  | 3.8040474  | -0.0956149 |
| H  | 1.8597539  | 5.0375670  | 3.4475560  |
| C  | -1.0191826 | -2.3987690 | -2.1156342 |
| C  | -1.4307620 | -2.2147358 | -3.4398028 |
| C  | -1.3800747 | -3.3596377 | -4.3228835 |
| C  | -1.5943103 | -3.2672039 | -5.7310867 |
| C  | -1.0654236 | -4.6564797 | -3.7704016 |
| C  | -1.0740305 | -5.8006504 | -4.6230054 |
| C  | -0.6676138 | -4.7643584 | -2.4065145 |
| H  | -0.3656466 | -5.7486317 | -2.0167218 |
| C  | -0.5628915 | -3.6482199 | -1.5882015 |
| C  | -1.3054332 | 1.5631984  | -4.1610780 |
| C  | -2.4078299 | 1.7117339  | -4.9956761 |
| H  | -2.6169092 | 2.6986641  | -5.4373551 |



|   |            |            |            |   |            |            |            |
|---|------------|------------|------------|---|------------|------------|------------|
| C | -3.3205473 | 0.6453431  | -5.2333200 | H | 3.8805155  | 4.9812220  | -2.0102673 |
| C | -4.5094109 | 0.8492395  | -5.9964513 | C | 1.6596608  | 3.8640271  | -3.4693207 |
| C | -3.0739032 | -0.6477578 | -4.6417974 | C | -3.2798298 | 5.0019873  | -3.0263929 |
| C | -4.0785174 | -1.6523647 | -4.7788138 | H | 1.3988739  | 7.3865816  | -3.7029953 |
| C | -1.8447565 | -0.8640094 | -3.9140602 | C | -0.2859500 | 4.7642343  | -2.3829178 |
| C | -1.0345331 | 0.2514063  | -3.6580748 | C | 2.3007987  | 6.9967143  | -3.1899452 |
| O | -1.0742732 | -1.3289722 | -1.2296692 | H | 2.8629003  | 7.8587165  | -2.7742991 |
| O | 0.1381168  | 0.0964242  | -2.9275592 | H | -0.7470836 | 5.5333944  | -1.7414626 |
| P | 0.0629829  | -0.1482055 | -1.3036810 | C | 2.8378287  | 1.1656532  | -4.3098666 |
| O | 1.4650538  | -0.7144392 | -0.9807557 | H | 2.3853180  | 1.7692209  | -6.9893684 |
| O | -0.4771121 | 1.0335989  | -0.5283339 | H | 1.0260137  | 2.9200199  | -6.7584685 |
| C | -1.3316523 | -5.6795071 | -5.9797270 | C | 0.9058350  | 2.8050660  | -4.0026137 |
| C | -1.5712536 | -4.3966034 | -6.5379725 | C | -2.8145636 | 3.4996918  | -1.0229962 |
| H | -0.8480767 | -6.7839975 | -4.1813266 | C | -1.0923752 | 3.7268745  | -2.8899177 |
| H | -1.3278341 | -6.5697612 | -6.6268342 | H | -3.1437617 | 5.1327449  | -4.1195615 |
| H | -1.7717387 | -2.2818307 | -6.1822745 | H | -2.8834384 | 5.9132625  | -2.5322074 |
| H | -1.7347897 | -4.2931761 | -7.6214984 | C | 1.5943633  | 1.8158081  | -4.9416740 |
| C | -5.2357970 | -1.4148270 | -5.5071248 | C | -0.4836038 | 2.7241016  | -3.7002643 |
| C | -5.4477526 | -0.1610211 | -6.1392855 | C | -2.5792708 | 3.7262760  | -2.5254424 |
| H | -3.9325921 | -2.6239562 | -4.2873247 | H | 2.5853836  | 0.6733781  | -3.3508034 |
| H | -5.9983115 | -2.2043108 | -5.5888451 | H | -2.4585558 | 2.4916716  | -0.7291703 |
| H | -6.3647407 | 0.0125605  | -6.7226434 | H | 3.6397640  | 1.9091693  | -4.1192507 |
| H | -4.6766724 | 1.8378357  | -6.4523557 | H | 2.9031828  | 4.7949654  | -0.5204718 |
| C | 1.5674585  | -3.7375326 | -0.2659219 | H | -2.3110711 | 4.2671530  | -0.3972665 |
| C | 0.1449593  | -3.6378772 | -0.2714522 | H | 2.9408407  | 6.5153203  | -3.9588803 |
| C | 2.2470473  | -3.5232400 | 0.9470718  | H | 0.8755773  | 1.0027003  | -5.1663786 |
| C | -0.5580500 | -3.3712977 | 0.9315733  | H | -3.0579093 | 2.8722801  | -3.0408514 |
| C | 0.1703019  | -3.1661503 | 2.1196021  | H | 2.7326112  | 3.9216738  | -3.7118719 |
| C | 1.5738665  | -3.2259786 | 2.1518355  | C | -3.6485868 | 0.4836191  | 11.9260586 |
| H | 3.3453023  | -3.6010561 | 0.9655762  | C | -3.3001105 | 0.7419640  | 10.5964493 |
| C | -2.0836576 | -3.3544641 | 0.9709701  | C | -2.3338695 | -0.0607569 | 9.9513608  |
| H | -0.3858955 | -2.9525812 | 3.0440195  | C | -1.7239365 | -1.1219650 | 10.6506310 |
| C | -2.6545169 | -2.0760850 | 1.6006752  | C | -2.0735764 | -1.3800738 | 11.9839541 |
| H | -2.3840121 | -1.9776914 | 2.6722311  | C | -3.0352365 | -0.5770356 | 12.6204409 |
| H | -3.7623507 | -2.0755531 | 1.5453980  | H | -4.4016625 | 1.1077985  | 12.4313025 |
| H | -2.2935001 | -1.1669370 | 1.0848730  | H | -3.7586515 | 1.5619502  | 10.0223574 |
| C | -2.6078959 | -4.6203180 | 1.6773210  | C | -1.9619401 | 0.2210213  | 8.5384211  |
| H | -2.4427793 | -3.3976941 | -0.0784812 | H | -0.9709987 | -1.7450681 | 10.1397888 |
| H | -2.2759541 | -4.6530877 | 2.7362796  | H | -1.5978285 | -2.2082209 | 12.5311265 |
| H | -2.2425723 | -5.5433373 | 1.1825873  | H | -3.3109137 | -0.7785112 | 13.6673684 |
| H | -3.7173947 | -4.6408619 | 1.6722597  | O | -2.4307617 | 1.1226529  | 7.8654128  |
| C | 2.3887225  | -3.0489341 | 3.4294218  | H | -1.1814239 | -0.4832096 | 8.1132326  |
| C | 1.6526332  | -2.2997831 | 4.5463165  |   |            |            |            |
| H | 2.3369525  | -2.1118259 | 5.3982612  |   |            |            |            |
| H | 0.7950630  | -2.8841748 | 4.9411598  |   |            |            |            |
| H | 1.2604665  | -1.3217217 | 4.1996071  |   |            |            |            |
| C | 2.9085060  | -4.4124596 | 3.9287178  |   |            |            |            |
| H | 3.2790364  | -2.4432727 | 3.1451527  |   |            |            |            |
| H | 3.5742139  | -4.2846501 | 4.8074301  |   |            |            |            |
| H | 3.4826810  | -4.9410926 | 3.1417579  |   |            |            |            |
| H | 2.0657068  | -5.0704315 | 4.2279764  |   |            |            |            |
| C | 2.3720031  | -4.0984457 | -1.5161170 |   |            |            |            |
| C | 3.5733094  | -3.1767242 | -1.7794191 |   |            |            |            |
| H | 4.1035809  | -3.4954335 | -2.7002090 |   |            |            |            |
| H | 4.3129367  | -3.1862181 | -0.9534738 |   |            |            |            |
| H | 3.2403198  | -2.1309947 | -1.9329738 |   |            |            |            |
| C | 2.8144276  | -5.5734706 | -1.4447214 |   |            |            |            |
| H | 1.6995254  | -3.9978334 | -2.3906108 |   |            |            |            |
| H | 3.3413479  | -5.8734412 | -2.3742806 |   |            |            |            |
| H | 1.9487385  | -6.2522035 | -1.3055795 |   |            |            |            |
| H | 3.5057771  | -5.7401494 | -0.5922991 |   |            |            |            |
| H | 1.2821043  | 6.5282403  | -1.3480348 |   |            |            |            |
| H | 2.6570146  | 3.3254149  | -6.1423654 |   |            |            |            |
| H | -4.3685339 | 4.9574484  | -2.8178028 |   |            |            |            |
| C | 1.9252020  | 5.9943213  | -2.0823930 |   |            |            |            |
| H | 3.2597048  | 0.3956995  | -4.9880857 |   |            |            |            |
| H | 3.7198413  | 6.3525740  | -0.8754168 |   |            |            |            |
| H | -3.8943059 | 3.5320427  | -0.7727569 |   |            |            |            |
| C | 1.0905171  | 4.8499441  | -2.6447415 |   |            |            |            |
| C | 1.9330346  | 2.4955022  | -6.2825710 |   |            |            |            |
| C | 3.1736421  | 5.5008639  | -1.3306769 |   |            |            |            |

### TS-7-j-ma; COSMO

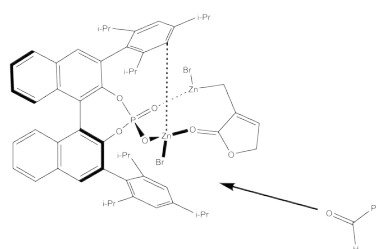

Energy (Hartree) = -11970.02379982

|    |            |            |           |
|----|------------|------------|-----------|
| Zn | 2.3822799  | -1.7614568 | 1.3878802 |
| Br | 4.6462080  | -1.1780497 | 1.3897986 |
| H  | 1.6991851  | 2.9929973  | 1.9441972 |
| Br | -4.3308079 | -0.6091440 | 1.7173899 |
| H  | -0.9946845 | -0.5718963 | 4.6307912 |
| Zn | -2.2119989 | 0.0197935  | 2.4592027 |
| C  | 0.4828343  | 2.3451963  | 3.6428841 |
| C  | 1.7737566  | 2.4314443  | 2.9026979 |
| C  | 0.0713835  | 1.0416603  | 3.7112966 |
| C  | -1.1768480 | 0.4098361  | 4.1488068 |
| C  | 1.1284062  | 0.2674611  | 3.0304218 |
| O  | 2.1046874  | 1.0642534  | 2.5801662 |
| O  | 1.1725558  | -0.9680066 | 2.8525997 |
| H  | 2.6196836  | 2.8607495  | 3.4825174 |
| H  | -1.7747911 | 1.0546925  | 4.8202291 |

|   |            |            |            |   |            |            |            |
|---|------------|------------|------------|---|------------|------------|------------|
| H | -0.0551255 | 3.2249850  | 4.0207412  | H | 2.8125257  | -6.1850926 | -2.1663683 |
| C | -1.4803839 | -3.3304109 | -0.3913366 | H | 1.7953178  | -6.7368861 | -0.7943568 |
| C | -2.3593970 | -3.1767873 | -1.4664801 | H | 3.4739994  | -6.1907273 | -0.4983871 |
| C | -2.5499142 | -4.3100083 | -2.3422871 | H | 0.3409453  | 6.0021120  | -1.3361074 |
| C | -3.2998986 | -4.2318100 | -3.5546738 | H | -0.3903567 | 2.3118146  | -5.8822691 |
| C | -1.9348730 | -5.5733183 | -2.0038671 | H | -4.9919658 | 3.3847502  | 0.6530138  |
| C | -2.1575010 | -6.7060681 | -2.8435154 | C | 0.6135311  | 5.3930657  | -2.2263539 |
| C | -1.0644073 | -5.6577955 | -0.8778212 | H | 0.8478427  | -0.4738250 | -4.9492713 |
| H | -0.5692071 | -6.6159493 | -0.6584210 | H | 2.7142289  | 6.0184489  | -2.1119318 |
| C | -0.7830243 | -4.5430009 | -0.1010616 | H | -3.0734138 | 2.6804526  | 2.2395374  |
| C | -2.7585715 | 0.5947644  | -2.0736192 | C | -0.2363327 | 4.1296426  | -2.1718146 |
| C | -4.1216164 | 0.6822339  | -2.3326774 | C | -1.0539540 | 1.4687321  | -5.5968102 |
| H | -4.5525779 | 1.6551717  | -2.6126956 | C | 2.1179230  | 5.0827138  | -2.1339321 |
| C | -4.9896572 | -0.4374942 | -2.1979159 | H | 2.4625126  | 4.4892741  | -3.0065441 |
| C | -6.4005865 | -0.2987502 | -2.3613256 | C | -0.0975586 | 3.1129146  | -3.1333168 |
| C | -4.4433889 | -1.7251048 | -1.8465143 | C | -4.2592184 | 3.5412980  | -0.1656467 |
| C | -5.3495367 | -2.8004722 | -1.6059257 | H | -0.7897756 | 6.4844215  | -3.5221880 |
| C | -3.0150111 | -1.8603039 | -1.7038135 | C | -1.1943681 | 3.9470955  | -1.1617430 |
| C | -2.2364655 | -0.6983565 | -1.7663286 | C | 0.2886332  | 6.2304301  | -3.4773805 |
| O | -1.2714507 | -2.2752890 | 0.4843193  | H | 0.8675015  | 7.1774053  | -3.4834707 |
| O | -0.8580949 | -0.7926605 | -1.5505889 | H | -1.3037176 | 4.7299691  | -0.3935135 |
| P | -0.3837102 | -0.9625617 | 0.0107940  | C | 0.7425476  | 0.3313283  | -4.1927138 |
| O | 1.1185519  | -1.2788477 | -0.0687808 | H | -0.9550176 | 0.6857089  | -6.3770987 |
| O | -0.8598715 | 0.1716446  | 0.9172586  | H | -2.0981166 | 1.8421534  | -5.6146842 |
| C | -2.9224328 | -6.6018299 | -3.9955975 | C | -0.8900283 | 1.9513943  | -3.1162568 |
| C | -3.4819956 | -5.3481111 | -4.3597070 | C | -2.3790329 | 2.9806796  | 1.4249003  |
| H | -1.6921648 | -7.6649147 | -2.5656210 | C | -2.0114120 | 2.8023190  | -1.0933674 |
| H | -3.0812161 | -7.4819601 | -4.6371220 | H | -4.7644690 | 3.3024483  | -1.1220855 |
| H | -3.7326837 | -3.2676976 | -3.8543391 | H | -3.9937519 | 4.6195680  | -0.1883350 |
| H | -4.0615279 | -5.2578616 | -5.2911501 | C | -0.6857542 | 0.9059897  | -4.2115372 |
| C | -6.7190693 | -2.6282532 | -1.7513845 | C | -1.8701851 | 1.8003626  | -2.0955773 |
| C | -7.2517169 | -1.3724400 | -2.1483129 | C | -3.0093422 | 2.6699998  | 0.0552163  |
| H | -4.9533303 | -3.7726832 | -1.2817732 | H | 0.9829579  | -0.0958504 | -3.1996959 |
| H | -7.3983917 | -3.4702292 | -1.5481800 | H | -1.4164877 | 2.4465503  | 1.5532240  |
| H | -8.3391764 | -1.2497832 | -2.2665258 | H | 1.4985496  | 1.1095216  | -4.4282245 |
| H | -6.8023048 | 0.6883293  | -2.6394438 | H | 2.3556571  | 4.5015912  | -1.2198324 |
| C | 1.6382453  | -4.3567281 | 0.5411037  | H | -2.1773567 | 4.0636714  | 1.5635062  |
| C | 0.2815274  | -4.4820222 | 0.9481757  | H | 0.5413975  | 5.6763645  | -4.4056919 |
| C | 2.6218323  | -4.1217388 | 1.5393104  | H | -1.3805441 | 0.0652866  | -4.0127153 |
| C | -0.0640273 | -4.4086316 | 2.3255204  | H | -3.3408549 | 1.6124659  | 0.0901547  |
| C | 0.9470607  | -4.2033777 | 3.2823086  | H | 0.6530029  | 3.2282077  | -3.9319992 |
| C | 2.2964111  | -4.0524533 | 2.9205088  | C | 4.5463176  | 10.3601429 | 1.3665068  |
| H | 3.6852105  | -4.1059664 | 1.2524479  | C | 4.9985214  | 9.0399557  | 1.4621824  |
| C | -1.5083539 | -4.5799072 | 2.7816362  | C | 6.3819633  | 8.7742412  | 1.5695089  |
| H | 0.6708109  | -4.1525644 | 4.3462918  | C | 7.3044976  | 9.8413994  | 1.5791412  |
| C | -1.9738285 | -3.4460648 | 3.7062073  | C | 6.8497663  | 11.1647061 | 1.4841653  |
| H | -1.4409022 | -3.4507426 | 4.6796766  | C | 5.4718314  | 11.4225845 | 1.3781129  |
| H | -3.0589774 | -3.5326101 | 3.9138696  | H | 3.4691582  | 10.5711250 | 1.2823260  |
| H | -1.8047490 | -2.4616930 | 3.2296665  | H | 4.3027967  | 8.1865724  | 1.4564983  |
| C | -1.7017596 | -5.9642274 | 3.4299986  | C | 6.8646887  | 7.3743564  | 1.6745556  |
| H | -2.1491329 | -4.5484303 | 1.8770995  | H | 8.3824650  | 9.6251682  | 1.6625542  |
| H | -1.0792477 | -6.0699057 | 4.3432582  | H | 7.5678733  | 11.9988194 | 1.4925137  |
| H | -1.4191491 | -6.7786483 | 2.7324845  | H | 5.1136276  | 12.4611539 | 1.3034483  |
| H | -2.7614573 | -6.1125634 | 3.7223488  | O | 6.1427029  | 6.3879212  | 1.6864623  |
| C | 3.3999594  | -3.8989438 | 3.9587529  | H | 7.9894929  | 7.2751173  | 1.7469204  |
| C | 3.1716349  | -2.7118700 | 4.9083498  |   |            |            |            |
| H | 3.9925052  | -2.6537842 | 5.6515334  |   |            |            |            |
| H | 2.2168383  | -2.8042208 | 5.4661377  |   |            |            |            |
| H | 3.1506569  | -1.7571317 | 4.3479538  |   |            |            |            |
| C | 3.5835293  | -5.2197598 | 4.7304213  |   |            |            |            |
| H | 4.3373243  | -3.6946108 | 3.3976270  |   |            |            |            |
| H | 4.4378892  | -5.1425158 | 5.4335722  |   |            |            |            |
| H | 3.7783696  | -6.0676964 | 4.0431331  |   |            |            |            |
| H | 2.6780934  | -5.4661210 | 5.3237931  |   |            |            |            |
| C | 2.0740531  | -4.5470672 | -0.9098557 |   |            |            |            |
| C | 3.1317998  | -3.5449664 | -1.3972349 |   |            |            |            |
| H | 3.3770387  | -3.7506530 | -2.4587302 |   |            |            |            |
| H | 4.0799604  | -3.6058021 | -0.8250733 |   |            |            |            |
| H | 2.7572038  | -2.5046819 | -1.3359221 |   |            |            |            |
| C | 2.5623257  | -5.9984628 | -1.1020294 |   |            |            |            |
| H | 1.1759784  | -4.4069766 | -1.5442147 |   |            |            |            |

### TS-7-j-ma

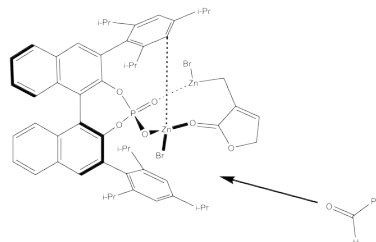

Energy (Hartree) = -11970.00887926  
number of imaginary frequencies: 5

|    |           |            |           |
|----|-----------|------------|-----------|
| Zn | 2.4062038 | -1.7361342 | 1.3724952 |
| Br | 4.6720759 | -1.2180246 | 1.4127007 |

|    |            |            |            |   |            |            |            |
|----|------------|------------|------------|---|------------|------------|------------|
| H  | 1.6973043  | 3.0036291  | 1.9532763  | H | 3.1552448  | -1.7523229 | 4.3386721  |
| Br | -4.3284844 | -0.5917797 | 1.7242816  | C | 3.5857430  | -5.2129070 | 4.7301647  |
| H  | -0.9783444 | -0.5866992 | 4.6139617  | H | 4.3356750  | -3.6872495 | 3.3935111  |
| Zn | -2.2120938 | 0.0166222  | 2.4569850  | H | 4.4394290  | -5.1342677 | 5.4340036  |
| C  | 0.4844538  | 2.3468812  | 3.6532312  | H | 3.7816467  | -6.0622480 | 4.0450156  |
| C  | 1.7750939  | 2.4397626  | 2.9105282  | H | 2.6806832  | -5.4610579 | 5.3233946  |
| C  | 0.0754381  | 1.0421313  | 3.7140038  | C | 2.0734112  | -4.5553677 | -0.9100008 |
| C  | -1.1670594 | 0.4007618  | 4.1467545  | C | 3.1316264  | -3.5535239 | -1.3973568 |
| C  | 1.1363601  | 0.2737982  | 3.0293611  | H | 3.3798397  | -3.7608367 | -2.4578951 |
| O  | 2.1105783  | 1.0769021  | 2.5833736  | H | 4.0789198  | -3.6095557 | -0.8233960 |
| O  | 1.1858864  | -0.9590394 | 2.8476769  | H | 2.7564788  | -2.5133199 | -1.3401653 |
| H  | 2.6218715  | 2.8697657  | 3.4896763  | C | 2.5595379  | -6.0068906 | -1.1045518 |
| H  | -1.7676389 | 1.0320341  | 4.8283839  | H | 1.1750090  | -4.4138029 | -1.5436746 |
| H  | -0.0574930 | 3.2219653  | 4.0360481  | H | 2.8102580  | -6.1937666 | -2.1687479 |
| C  | -1.4834377 | -3.3306498 | -0.3887247 | H | 1.7915826  | -6.7448429 | -0.7981077 |
| C  | -2.3629470 | -3.1773714 | -1.4636890 | H | 3.4704155  | -6.2025801 | -0.5009099 |
| C  | -2.5537908 | -4.3103462 | -2.3397277 | H | 0.3368404  | 6.0054671  | -1.3406232 |
| C  | -3.3059306 | -4.2325114 | -3.5505576 | H | -0.3769944 | 2.3048366  | -5.8740048 |
| C  | -1.9367480 | -5.5730528 | -2.0036145 | H | -4.9948563 | 3.3926712  | 0.6459994  |
| C  | -2.1583379 | -6.7044228 | -2.8445558 | C | 0.6077569  | 5.3971879  | -2.2322628 |
| C  | -1.0656364 | -5.6567985 | -0.4785226 | H | 0.8600027  | -0.4813894 | -4.9369643 |
| H  | -0.5680542 | -6.6140690 | -0.6603271 | H | 2.7050300  | 6.0387710  | -2.1348347 |
| C  | -0.7844859 | -4.5430674 | -0.1004087 | H | -3.0811202 | 2.6831135  | 2.2346782  |
| C  | -2.7547170 | 0.5940690  | -2.0710669 | C | -0.2346984 | 4.1291963  | -2.1713788 |
| C  | -4.1173623 | 0.6834640  | -2.3306922 | C | -1.0405681 | 1.4618414  | -5.5884923 |
| H  | -4.5449877 | 1.6580103  | -2.6100595 | C | 2.1148894  | 5.0990509  | -2.1503613 |
| C  | -4.9880191 | -0.4338023 | -2.1965710 | H | 2.4582899  | 4.5063455  | -3.0237045 |
| C  | -6.3981678 | -0.2927633 | -2.3603959 | C | -0.0891451 | 3.1080231  | -3.1263708 |
| C  | -4.4444824 | -1.7223084 | -1.8448937 | C | -4.2591640 | 3.5507242  | -0.1694418 |
| C  | -5.3528159 | -2.7957972 | -1.6054450 | H | -0.8144374 | 6.4748723  | -3.5182597 |
| C  | -3.0164906 | -1.8600317 | -1.7011532 | C | -1.1971033 | 3.9497535  | -1.1655402 |
| C  | -2.2351476 | -0.6997942 | -1.7630776 | C | 0.2663647  | 6.2309713  | -3.4812579 |
| O  | -1.2744688 | -2.2761139 | 0.4866347  | H | 0.8371613  | 7.1827375  | -3.4944675 |
| O  | -0.8571971 | -0.7962926 | -1.5473991 | H | -1.3134058 | 4.7371740  | -0.4028492 |
| P  | -0.3796624 | -0.9669860 | 0.0129411  | C | 0.7539788  | 0.3244891  | -4.1813550 |
| O  | 1.1194680  | -1.2945448 | -0.0695327 | H | -0.9410448 | 0.6791441  | -6.3689738 |
| O  | -0.8469829 | 0.1688494  | 0.9219219  | H | -2.0841578 | 1.8362366  | -5.6075595 |
| C  | -2.9246057 | -6.6005391 | -3.9950869 | C | -0.8809939 | 1.9466244  | -3.1093306 |
| C  | -3.4873195 | -5.3480053 | -4.3561340 | C | -2.3832604 | 2.9810532  | 1.4223356  |
| H  | -1.6903873 | -7.6625712 | -2.5685448 | C | -2.0120258 | 2.8040279  | -1.0948674 |
| H  | -3.0820359 | -7.4801837 | -4.6375458 | H | -4.7624052 | 3.3165246  | -1.1279386 |
| H  | -3.7413867 | -3.2687251 | -3.8469137 | H | -3.9912117 | 4.6284063  | -0.1892641 |
| H  | -4.0690213 | -5.2577189 | -5.2861537 | C | -0.6738569 | 0.8997355  | -4.2026203 |
| C  | -6.7214001 | -2.6208785 | -1.7524762 | C | -1.8654537 | 1.7986979  | -2.0925990 |
| C  | -7.2512392 | -1.3644099 | -2.1488227 | C | -3.0129615 | 2.6746637  | 0.0513891  |
| H  | -4.9581021 | -3.7682028 | -1.2804988 | H | 0.9943728  | -0.1013852 | -3.1880066 |
| H  | -7.4023550 | -3.4614305 | -1.5493647 | H | -1.4239281 | 2.4410485  | 1.5512422  |
| H  | -8.3383538 | -1.2391443 | -2.2666528 | H | 1.5112261  | 1.1013729  | -4.4168368 |
| H  | -6.7976610 | 0.6956190  | -2.6367998 | H | 2.3647411  | 4.5207024  | -1.2380209 |
| C  | 1.6381153  | -4.3650173 | 0.5415159  | H | -2.1758763 | 4.0630547  | 1.5619086  |
| C  | 0.2806112  | -4.4833806 | 0.9480251  | H | 0.5151891  | 5.6772806  | -4.4106927 |
| C  | 2.6213302  | -4.1329882 | 1.5389391  | H | -1.3693006 | 0.0594624  | -4.0043519 |
| C  | -0.0657087 | -4.4032139 | 2.3246167  | H | -3.3493266 | 1.6186745  | 0.0871137  |
| C  | 0.9456351  | -4.1949290 | 3.2799210  | H | 0.6655342  | 3.2201093  | -3.9215081 |
| C  | 2.2957730  | -4.0515932 | 2.9181361  | C | 4.5435239  | 10.3542128 | 1.3619969  |
| H  | 3.6843947  | -4.1119818 | 1.2518831  | C | 4.9972108  | 9.0344250  | 1.4504793  |
| C  | -1.5103916 | -4.5764449 | 2.7802304  | C | 6.3794632  | 8.7697624  | 1.5651201  |
| H  | 0.6689444  | -4.1357369 | 4.3433966  | C | 7.2992050  | 9.8378724  | 1.5887481  |
| C  | -1.9803028 | -3.4498600 | 3.7106988  | C | 6.8434736  | 11.1610700 | 1.5011025  |
| H  | -1.4429922 | -3.4524982 | 4.6819054  | C | 5.4664811  | 11.4177891 | 1.3881072  |
| H  | -3.0636839 | -3.5444777 | 3.9234231  | H | 3.4665875  | 10.5641447 | 1.2721339  |
| H  | -1.8236956 | -2.4628178 | 3.2360036  | H | 4.3065610  | 8.1771042  | 1.4333995  |
| C  | -1.7015098 | -5.9654170 | 3.4191291  | C | 6.8584247  | 7.3657575  | 1.6644175  |
| H  | -2.1512280 | -4.5401916 | 1.8759275  | H | 8.3769806  | 9.6221386  | 1.6776550  |
| H  | -1.0791384 | -6.0765479 | 4.3318240  | H | 7.5600783  | 11.9962916 | 1.5206989  |
| H  | -1.4156255 | -6.7744272 | 2.7168118  | H | 5.1071692  | 12.4563552 | 1.3193089  |
| H  | -2.7607692 | -6.1197297 | 3.7099234  | O | 6.1344870  | 6.3840531  | 1.6671823  |
| C  | 3.3996221  | -3.8942441 | 3.9558786  | H | 7.9845911  | 7.2643684  | 1.7421074  |
| C  | 3.1724334  | -2.7048209 | 4.9024825  |   |            |            |            |
| H  | 3.9933301  | -2.6451812 | 5.6454851  |   |            |            |            |
| H  | 2.2177121  | -2.7932120 | 5.4612157  |   |            |            |            |

TS-7-j-mi; COSMO

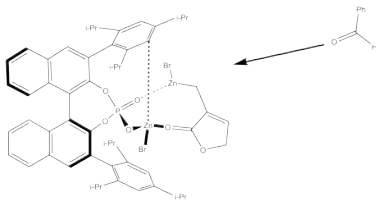

Energy (Hartree)= -11969.98388185

|    |            |            |            |
|----|------------|------------|------------|
| Zn | 2.5901485  | 0.3360388  | -1.1177340 |
| Br | 4.3836381  | 0.4623954  | -2.5267977 |
| C  | 2.8969197  | 5.2082006  | 0.0321124  |
| C  | 1.9441705  | 4.2588528  | 0.2650446  |
| C  | 2.6505784  | 2.9749926  | 0.1038383  |
| O  | 3.9483131  | 3.1426645  | -0.1554446 |
| C  | 4.2091270  | 4.5606986  | -0.2420062 |
| O  | 2.1372694  | 1.8320316  | 0.1457861  |
| C  | 0.4882044  | 4.3423658  | 0.5543686  |
| H  | 4.6055295  | 4.7645443  | -1.2606861 |
| H  | 5.0033311  | 4.8157225  | 0.4925324  |
| Zn | -0.5335811 | 2.6189688  | 0.6132374  |
| Br | -2.0092025 | 2.0259695  | 2.3564835  |
| H  | 0.0135385  | 5.0834241  | -0.1234466 |
| H  | 0.3452258  | 4.7469452  | 1.5815026  |
| H  | 2.7489372  | 6.2970698  | 0.0208480  |
| C  | -1.5432171 | -2.5665492 | -0.5230389 |
| C  | -2.3986025 | -2.8492930 | -1.5956496 |
| C  | -2.5459236 | -4.2275269 | -2.0011755 |
| C  | -3.2541892 | -4.6183854 | -3.1780462 |
| C  | -1.9189221 | -5.2593623 | -1.2112493 |
| C  | -2.0854861 | -6.6264524 | -1.5866255 |
| C  | -1.1165987 | -4.8971849 | -0.0921745 |
| H  | -0.6553681 | -5.6958372 | 0.5081671  |
| C  | -0.8745619 | -3.5711333 | 0.2455473  |
| C  | -2.8210808 | 0.3612433  | -3.6590415 |
| C  | -4.1699372 | 0.2998883  | -3.9921392 |
| H  | -4.5985547 | 1.0647520  | -4.6583580 |
| C  | -5.0333679 | -0.6967095 | -3.4480908 |
| C  | -6.4361108 | -0.6812710 | -3.7132858 |
| C  | -4.4959028 | -1.7124227 | -2.5729566 |
| C  | -5.4019837 | -2.6243368 | -1.9540741 |
| C  | -3.0734548 | -1.7464709 | -2.3372426 |
| C  | -2.3054600 | -0.6954605 | -2.8424777 |
| O  | -1.3552650 | -1.2363089 | -0.1343913 |
| O  | -0.9385204 | -0.6927765 | -2.5854851 |
| P  | -0.4203030 | -0.2851364 | -1.0846363 |
| O  | 1.0474916  | -0.7775679 | -1.0577644 |
| O  | -0.6857188 | 1.1771174  | -0.7726481 |
| C  | -2.8097671 | -6.9728727 | -2.7173297 |
| C  | -3.3832420 | -5.9559268 | -3.5264802 |
| H  | -1.6113053 | -7.4023578 | -0.9652330 |
| H  | -2.9265762 | -8.0304204 | -2.9989926 |
| H  | -3.6940327 | -3.8450513 | -3.8221862 |
| H  | -3.9306726 | -6.2284379 | -4.4417633 |
| C  | -6.7642984 | -2.5672282 | -2.2154273 |
| C  | -7.2866322 | -1.5990274 | -3.1142311 |
| H  | -5.0091504 | -3.3725974 | -1.2512607 |
| H  | -7.4448017 | -3.2741883 | -1.7167381 |
| H  | -8.3675468 | -1.5681155 | -3.3195915 |
| H  | -6.8344007 | 0.0908133  | -4.3903682 |
| C  | 1.4385754  | -3.2717681 | 1.2512568  |
| C  | 0.0231872  | -3.1900410 | 1.3829794  |
| C  | 2.2361563  | -2.8839209 | 2.3431249  |
| C  | -0.5564619 | -2.7427564 | 2.6006896  |
| C  | 0.2884850  | -2.3679351 | 3.6615434  |
| C  | 1.6880646  | -2.4259056 | 3.5548802  |
| H  | 3.3332521  | -2.9421790 | 2.2534787  |
| C  | -2.0701420 | -2.7626551 | 2.8037534  |
| H  | -0.1675538 | -2.0223129 | 4.6001180  |

|   |            |            |            |
|---|------------|------------|------------|
| C | -2.6069079 | -1.5622473 | 3.5934655  |
| H | -2.2637377 | -1.5683667 | 4.6493166  |
| H | -3.7159052 | -1.5852958 | 3.6145213  |
| H | -2.2926080 | -0.6045595 | 3.1331789  |
| C | -2.4857425 | -4.0987837 | 3.4514139  |
| H | -2.5441460 | -2.7258252 | 1.8015824  |
| H | -2.0290819 | -4.2037352 | 4.4582242  |
| H | -2.1584466 | -4.9654558 | 2.8414036  |
| H | -3.5880727 | -4.1558233 | 3.5680951  |
| C | 2.6138356  | -2.0779317 | 4.7163375  |
| C | 2.0466215  | -1.0187885 | 5.6716893  |
| H | 2.8156389  | -0.7113776 | 6.4094116  |
| H | 1.1817695  | -1.4089796 | 6.2481532  |
| H | 1.7072668  | -0.1149168 | 5.1264184  |
| C | 3.0077867  | -3.3580196 | 5.4818872  |
| H | 3.5441014  | -1.6630787 | 4.2669528  |
| H | 3.7303605  | -3.1322037 | 6.2937342  |
| H | 3.4703496  | -4.1064244 | 4.8070608  |
| H | 2.1123472  | -3.8283441 | 5.9401991  |
| C | 2.1060745  | -3.8245632 | -0.0084821 |
| C | 3.3713852  | -3.0620944 | -0.4298190 |
| H | 3.7323615  | -3.4174150 | -1.4158278 |
| H | 4.2039529  | -3.1886087 | 0.2920982  |
| H | 3.1783518  | -1.9758906 | -0.5273454 |
| C | 2.4453974  | -5.3185073 | 0.1776058  |
| H | 1.3758785  | -3.7361126 | -0.8392687 |
| H | 2.8935743  | -5.7429691 | -0.7447294 |
| H | 1.5489691  | -5.9179194 | 0.4290625  |
| H | 3.1751681  | -5.4507452 | 1.0041195  |
| H | 0.8725737  | 5.4019525  | -3.6666953 |
| H | 0.0003877  | 0.8604604  | -7.4356243 |
| H | -5.0597536 | 4.5755623  | -2.8502124 |
| C | 1.2292640  | 4.5152855  | -4.2363180 |
| H | 0.9549967  | -1.6904709 | -5.7325288 |
| H | 3.2602856  | 4.7180726  | -3.4135972 |
| H | -4.0828927 | 3.7395094  | -0.6741744 |
| C | 0.1013033  | 3.4932803  | -4.2210384 |
| C | -0.7336801 | 0.1407624  | -7.0159534 |
| C | 2.4612276  | 3.9524888  | -3.5042872 |
| H | 2.8917019  | 3.0779752  | -4.0335927 |
| C | 0.2524243  | 2.2463163  | -4.8538168 |
| C | -4.0902552 | 4.3610116  | -3.3454089 |
| H | 0.7012683  | 5.4119790  | -6.1728982 |
| C | -1.1005370 | 3.7426075  | -3.5425125 |
| C | 1.5840586  | 4.9817524  | -5.6585395 |
| H | 2.3804667  | 5.7542879  | -5.6349360 |
| H | -1.2411704 | 4.7264409  | -3.0647013 |
| C | 0.8789738  | -0.7013625 | -5.2360474 |
| H | -0.6280965 | -0.8142971 | -7.5714727 |
| H | -1.7481795 | 0.5435215  | -7.2123544 |
| C | -0.7196797 | 1.2392899  | -4.7562744 |
| C | -3.1534532 | 3.4045135  | -1.1783952 |
| C | -2.1204961 | 2.7761425  | -3.4285646 |
| H | -4.2875543 | 4.1670331  | -4.4197468 |
| H | -3.4734655 | 5.2817640  | -3.2803454 |
| C | -0.4988668 | -0.0729670 | -5.5072093 |
| C | -1.9035063 | 1.4901902  | -4.0021402 |
| C | -3.3969118 | 3.1590413  | -2.6767241 |
| H | 1.0458934  | -0.8485125 | -4.1514184 |
| H | -2.8280143 | 2.4735878  | -0.6751121 |
| H | 1.7070845  | -0.0745434 | -5.6272202 |
| H | 2.1835081  | 3.6106224  | -2.4879439 |
| H | -2.3845179 | 4.1883571  | -1.0074101 |
| H | 1.9570821  | 4.1386910  | -6.2768073 |
| H | -1.2659329 | -0.7960709 | -5.1628197 |
| H | -4.0998429 | 2.3066701  | -2.7395095 |
| H | 1.1707799  | 2.0415273  | -5.4262140 |
| C | 3.1563467  | 3.9648630  | 9.0921405  |
| C | 4.2166130  | 3.3219333  | 8.4446865  |
| C | 5.5227304  | 3.4051918  | 8.9772134  |
| C | 5.7543753  | 4.1358054  | 10.1616852 |

|   |           |           |            |
|---|-----------|-----------|------------|
| C | 4.6905902 | 4.7800225 | 10.8097635 |
| C | 3.3934360 | 4.6941438 | 10.2743266 |
| H | 2.1373953 | 3.9019795 | 8.6803740  |
| H | 4.0656768 | 2.7439360 | 7.5196841  |
| C | 6.6511532 | 2.7268954 | 8.2924496  |
| H | 6.7766059 | 4.1948965 | 10.5708028 |
| H | 4.8692043 | 5.3505117 | 11.7339844 |
| H | 2.5573031 | 5.1995163 | 10.7822533 |
| O | 6.5528266 | 2.0781268 | 7.2608588  |
| H | 7.6506267 | 2.8547565 | 8.8076497  |

### TS-7-j-mi

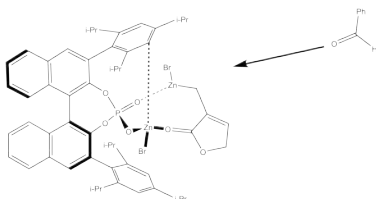

Energy (Hartree) = -11969.96576458  
 number of imaginary frequencies: 7

|    |            |            |            |
|----|------------|------------|------------|
| Zn | 2.5769574  | 0.3347451  | -1.1440070 |
| Br | 4.3984779  | 0.4747715  | -2.5007944 |
| C  | 2.8937827  | 5.2052027  | 0.0305525  |
| C  | 1.9417477  | 4.2556759  | 0.2641148  |
| C  | 2.6536334  | 2.9695056  | 0.1091722  |
| O  | 3.9537113  | 3.1432464  | -0.1461846 |
| C  | 4.2091935  | 4.5583101  | -0.2403660 |
| O  | 2.1481258  | 1.8269070  | 0.1523644  |
| C  | 0.4859071  | 4.3368870  | 0.5478944  |
| H  | 4.6044810  | 4.7567226  | -1.2610292 |
| H  | 5.0038435  | 4.8190711  | 0.4924808  |
| Zn | -0.5573546 | 2.6200076  | 0.6251438  |
| Br | -2.0075051 | 2.0255885  | 2.3620895  |
| H  | 0.0155851  | 5.0838333  | -0.1266845 |
| H  | 0.3402354  | 4.7381141  | 1.5762744  |
| H  | 2.7416157  | 6.2935490  | 0.0178114  |
| C  | -1.5435923 | -2.5643132 | -0.5231921 |
| C  | -2.3987583 | -2.8482029 | -1.5957390 |
| C  | -2.5458176 | -4.2263902 | -2.0013896 |
| C  | -3.2543446 | -4.6173689 | -3.1777828 |
| C  | -1.9185938 | -5.2580347 | -1.2118740 |
| C  | -2.0856097 | -6.6245283 | -1.5875222 |
| C  | -1.1163702 | -4.8947819 | -0.0934607 |
| H  | -0.6539828 | -5.6922746 | 0.5075916  |
| C  | -0.8741918 | -3.5689960 | 0.2450222  |
| C  | -2.8212932 | 0.3615198  | -3.6596441 |
| C  | -4.1700514 | 0.2997075  | -3.9921852 |
| H  | -4.5977583 | 1.0654250  | -4.6580346 |
| C  | -5.0336081 | -0.6963478 | -3.4481663 |
| C  | -6.4360306 | -0.6815169 | -3.7122996 |
| C  | -4.4958895 | -1.7117287 | -2.5732062 |
| C  | -5.4014956 | -2.6234746 | -1.9540286 |
| C  | -3.0736166 | -1.7459098 | -2.3378727 |
| C  | -2.3054471 | -0.6951722 | -2.8432330 |
| O  | -1.3565951 | -1.2339249 | -0.1347531 |
| O  | -0.9389774 | -0.6919889 | -2.5860021 |
| P  | -0.4224584 | -0.2834012 | -1.0840378 |
| O  | 1.0450191  | -0.7819336 | -1.0564196 |
| O  | -0.6737901 | 1.1824241  | -0.7793314 |
| C  | -2.8100414 | -6.9711104 | -2.7174297 |
| C  | -3.3835848 | -5.9545231 | -3.5259055 |
| H  | -1.6110797 | -7.4004437 | -0.9664134 |
| H  | -2.9268428 | -8.0286782 | -2.9989084 |
| H  | -3.6944576 | -3.8434379 | -3.8208617 |

|   |            |            |            |
|---|------------|------------|------------|
| H | -3.9313841 | -6.2268612 | -4.4409730 |
| C | -6.7633944 | -2.5665669 | -2.2149936 |
| C | -7.2860477 | -1.5988443 | -3.1131978 |
| H | -5.0070849 | -3.3710067 | -1.2515088 |
| H | -7.4435478 | -3.2733298 | -1.7156912 |
| H | -8.3669950 | -1.5676627 | -3.3180153 |
| H | -6.8346246 | 0.0907313  | -4.3890034 |
| C | 1.4391820  | -3.2727822 | 1.2514625  |
| C | 0.0239143  | -3.1894887 | 1.3826197  |
| C | 2.2363126  | -2.8854293 | 2.3434515  |
| C | -0.5559832 | -2.7426186 | 2.6001739  |
| C | 0.2891142  | -2.3687475 | 3.6609824  |
| C | 1.6883325  | -2.4273046 | 3.5549037  |
| H | 3.3334588  | -2.9440085 | 2.2541824  |
| C | -2.0695759 | -2.7616213 | 2.8034579  |
| H | -0.1676612 | -2.0220274 | 4.5986547  |
| C | -2.6060574 | -1.5604180 | 3.5917502  |
| H | -2.2637207 | -1.5651578 | 4.6478390  |
| H | -3.7148401 | -1.5830352 | 3.6128344  |
| H | -2.2939540 | -0.6025735 | 3.1306420  |
| C | -2.4845322 | -4.0977294 | 3.4516533  |
| H | -2.5436054 | -2.7251105 | 1.8013147  |
| H | -2.0277663 | -4.2026987 | 4.4582796  |
| H | -2.1575753 | -4.9652107 | 2.8427290  |
| H | -3.5866946 | -4.1549499 | 3.5691361  |
| C | 2.6139032  | -2.0794772 | 4.7165411  |
| C | 2.0467363  | -1.0206939 | 5.6721847  |
| H | 2.8156459  | -0.7125627 | 6.4096543  |
| H | 1.1824966  | -1.4113912 | 6.2490958  |
| H | 1.7054044  | -0.1174629 | 5.1274131  |
| C | 3.0088283  | -3.3592821 | 5.4816992  |
| H | 3.5438142  | -1.6633105 | 4.2673483  |
| H | 3.7314013  | -3.1339163 | 6.2936138  |
| H | 3.4707085  | -4.1078393 | 4.8068461  |
| H | 2.1137914  | -3.8305535 | 5.9393686  |
| C | 2.1070653  | -3.8267999 | -0.0076666 |
| C | 3.3716766  | -3.0641802 | -0.4305322 |
| H | 3.7344565  | -3.4202220 | -1.4155089 |
| H | 4.2047526  | -3.1875172 | 0.2913386  |
| C | 3.1773169  | -1.9787742 | -0.5326746 |
| H | 2.4478207  | -5.3200246 | 0.1802032  |
| H | 1.3770619  | -3.7400771 | -0.8387879 |
| H | 2.8959143  | -5.7461742 | -0.7413545 |
| H | 1.5520820  | -5.9196498 | 0.4329632  |
| H | 3.1771211  | -5.4512619 | 1.0071177  |
| H | 0.8719644  | 5.4014553  | -3.6668256 |
| H | -0.0007984 | 0.8617349  | -7.4366880 |
| H | -5.0600932 | 4.5768560  | -2.8512276 |
| C | 1.2289629  | 4.5147360  | -4.2366721 |
| H | 0.9543631  | -1.6903019 | -5.7328347 |
| H | 3.2609613  | 4.7167864  | -3.4149563 |
| H | -4.0832805 | 3.7378577  | -0.6734234 |
| C | 0.1005215  | 3.4931155  | -4.2217404 |
| C | -0.7344074 | 0.1419168  | -7.0167112 |
| C | 2.4606242  | 3.9518314  | -3.5041421 |
| H | 2.8920219  | 3.0765622  | -4.0312516 |
| C | 0.2517432  | 2.2463560  | -4.8540264 |
| C | -4.0908438 | 4.3613143  | -3.3463652 |
| H | 0.7015237  | 5.4115999  | -6.1728234 |
| C | -1.1013026 | 3.7425819  | -3.5440647 |
| C | 1.5842548  | 4.9821484  | -5.6582709 |
| H | 2.3808425  | 5.7545920  | -5.6356953 |
| H | -1.2426287 | 4.7266223  | -3.0668502 |
| C | 0.8780024  | -0.7011186 | -5.2369268 |
| H | -0.6287828 | -0.8126669 | -7.5729089 |
| H | -1.7484183 | 0.5452932  | -7.2132345 |
| C | -0.7204587 | 1.2396979  | -4.7570777 |
| C | -3.1545272 | 3.4041380  | -1.1792911 |
| C | -2.1212860 | 2.7765621  | -3.4299482 |
| H | -4.2875352 | 4.1689085  | -4.4209946 |
| H | -3.4746716 | 5.2824747  | -3.2819149 |

|   |            |            |            |
|---|------------|------------|------------|
| C | -0.4994842 | -0.0723365 | -5.5081756 |
| C | -1.9040681 | 1.4906443  | -4.0029997 |
| C | -3.3974585 | 3.1594276  | -2.6776432 |
| H | 1.0451311  | -0.8497025 | -4.1526777 |
| H | -2.8302085 | 2.4736761  | -0.6744502 |
| H | 1.7073192  | -0.0757977 | -5.6278299 |
| H | 2.1828250  | 3.6106653  | -2.4875884 |
| H | -2.3865035 | 4.1887877  | -1.0076567 |
| H | 1.9567764  | 4.1395495  | -6.2771425 |
| H | -1.2667815 | -0.7951325 | -5.1637262 |
| H | -4.1001562 | 2.3068527  | -2.7405448 |
| H | 1.1699897  | 2.0409441  | -5.4263213 |
| C | 3.1572910  | 3.9657599  | 9.0934872  |
| C | 4.2173912  | 3.3228117  | 8.4462842  |
| C | 5.5229397  | 3.4065518  | 8.9783148  |
| C | 5.7536988  | 4.1373457  | 10.1617655 |
| C | 4.6904332  | 4.7815791  | 10.8099287 |
| C | 3.3937607  | 4.6953561  | 10.2748812 |
| H | 2.1382664  | 3.9021365  | 8.6819681  |
| H | 4.0696344  | 2.7426552  | 7.5221259  |
| C | 6.6507758  | 2.7261488  | 8.2900815  |
| H | 6.7763221  | 4.1961659  | 10.5703689 |
| H | 4.8689662  | 5.3522081  | 11.7340912 |
| H | 2.5575507  | 5.2005143  | 10.7828616 |
| O | 6.5504429  | 2.0791421  | 7.2608355  |
| H | 7.6520951  | 2.8547683  | 8.8061192  |

|   |            |            |            |
|---|------------|------------|------------|
| C | 4.1947712  | -2.6537404 | 86.8158663 |
| C | 2.3486135  | -1.4400387 | 87.9344038 |
| C | 1.4912867  | -2.5287191 | 87.5948887 |
| C | 1.8880720  | -0.2761927 | 88.6517186 |
| C | 2.7585173  | 0.8155723  | 88.7528850 |
| O | 0.1459112  | 1.8713521  | 88.0600657 |
| O | 2.3162387  | 1.9808262  | 89.3860254 |
| P | 1.3130175  | 2.9457119  | 88.5194607 |
| O | 0.7899099  | 3.9737460  | 89.5358602 |
| O | 1.9135133  | 3.4361530  | 87.2024920 |
| C | -1.0947175 | -3.1169726 | 91.9405335 |
| C | 0.2635034  | -3.1975840 | 91.5330771 |
| H | -2.9332709 | -1.9785053 | 91.8255063 |
| H | -1.5105683 | -3.8749655 | 92.6215884 |
| H | 1.8528850  | -2.3276509 | 90.3652591 |
| H | 0.9001898  | -4.0121900 | 91.9107351 |
| C | 1.9750788  | -3.6346456 | 86.9096905 |
| C | 3.3422268  | -3.7096213 | 86.5312193 |
| H | 0.4283209  | -2.4784218 | 87.8678561 |
| H | 1.2905853  | -4.4569372 | 86.6511973 |
| H | 3.7163800  | -4.5958794 | 85.9961964 |
| H | 5.2492831  | -2.6846534 | 86.4995283 |
| C | -2.2811172 | 3.3704853  | 90.2316814 |
| C | -2.2733579 | 2.3915841  | 89.2011327 |
| C | -2.7081676 | 4.6871161  | 89.9083180 |
| C | -2.7297764 | 2.7213448  | 87.8939660 |
| C | -3.1744187 | 4.0288559  | 87.6271537 |
| C | -3.1680579 | 5.0338704  | 88.6085940 |
| H | -2.7989995 | 5.4348266  | 90.7131358 |
| C | -2.7726200 | 1.6597439  | 86.8001364 |
| H | -3.5182186 | 4.2767850  | 86.6142177 |
| C | -2.4407080 | 2.1992617  | 85.4032095 |
| H | -3.2319613 | 2.8680400  | 85.0054082 |
| H | -2.3188508 | 1.3618583  | 84.6882523 |
| H | -1.4883414 | 2.7657753  | 85.4129485 |
| C | -4.1378303 | 0.9435879  | 86.8243209 |
| H | -1.9999760 | 0.9023958  | 87.0419416 |
| H | -4.9616099 | 1.6554299  | 86.6072554 |
| H | -4.3359041 | 0.4866830  | 87.8151635 |
| H | -4.1690304 | 0.1385160  | 86.0618659 |
| C | -3.6854345 | 6.4424719  | 88.3516293 |
| C | -3.4936081 | 6.9164507  | 86.9051642 |
| H | -3.7627818 | 7.9878038  | 86.8162065 |
| H | -4.1418566 | 6.3584391  | 86.1975253 |
| H | -2.4420501 | 6.7928601  | 86.5790515 |
| C | -5.1611321 | 6.5446857  | 88.7878123 |
| H | -3.0917417 | 7.1157018  | 89.0105083 |
| H | -5.5296217 | 7.5844441  | 88.6717283 |
| H | -5.2943881 | 6.2511014  | 89.8485625 |
| H | -5.8011377 | 5.8817848  | 88.1683115 |
| C | -1.9109790 | 3.0386168  | 91.6748376 |
| C | -0.9979469 | 4.0722242  | 92.3516417 |
| H | -0.7705757 | 3.7476299  | 93.3871166 |
| H | -1.4582773 | 5.0791651  | 92.4168987 |
| H | -0.0355859 | 4.1686285  | 91.8118447 |
| C | -3.2037667 | 2.8220816  | 92.4890529 |
| H | -1.3588707 | 2.0778205  | 91.6610711 |
| H | -2.9601040 | 2.5061591  | 93.5239754 |
| H | -3.8514727 | 2.0458078  | 92.0341334 |
| H | -3.7955851 | 3.7595985  | 92.5494807 |
| H | 7.4158846  | 6.0835844  | 87.4848364 |
| H | 7.0552334  | 2.0918366  | 91.8100022 |
| H | 5.5910897  | 1.1427125  | 84.0553726 |
| C | 7.2212319  | 5.7738839  | 88.5354610 |
| H | 4.0175395  | 2.1663849  | 92.8150090 |
| H | 6.9258015  | 7.8513273  | 89.1933203 |
| H | 3.7547551  | 2.9753115  | 83.9972545 |
| C | 6.4449924  | 4.4643932  | 88.4721993 |
| C | 6.3473198  | 1.2801741  | 91.5399683 |
| C | 6.3838982  | 6.8829621  | 89.1988243 |
| H | 6.1500684  | 6.6314990  | 90.2542387 |

### agg-7-d-ma; COSMO

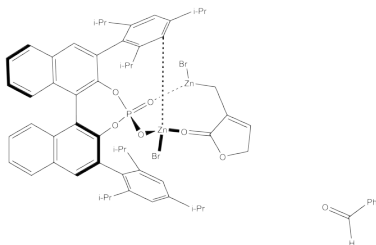

Energy (Hartree) = -11970.02412029

|    |            |            |            |
|----|------------|------------|------------|
| Zn | -0.5414530 | 5.4268370  | 89.3021863 |
| Br | -0.4755604 | 7.4517854  | 90.4712247 |
| H  | 3.5882830  | 6.7660201  | 87.1550709 |
| Br | 1.3141890  | 0.6900711  | 84.8936367 |
| H  | 1.0072230  | 4.8297110  | 83.4753460 |
| Zn | 1.2095059  | 2.9816019  | 85.3148697 |
| C  | 2.4167435  | 6.4917290  | 85.3354089 |
| C  | 2.6750049  | 7.1518077  | 86.6469204 |
| C  | 1.2618209  | 5.7607256  | 85.4040592 |
| C  | 0.6546904  | 4.7590854  | 84.5218204 |
| C  | 0.7396740  | 5.9921736  | 86.7650487 |
| O  | 1.5425632  | 6.7975948  | 87.4687006 |
| O  | -0.3054635 | 5.5236705  | 87.2632237 |
| H  | 2.7424633  | 8.2607891  | 86.6162402 |
| H  | -0.4529718 | 4.7966250  | 84.5522046 |
| H  | 3.1091189  | 6.5532367  | 84.4852576 |
| C  | -0.2983142 | 0.8975009  | 88.9405128 |
| C  | 0.5213683  | -0.1935125 | 89.2409171 |
| C  | 0.0049615  | -1.1812862 | 90.1605762 |
| C  | 0.7987633  | -2.2549141 | 90.6657129 |
| C  | -1.3611638 | -1.0712037 | 90.6200636 |
| C  | -1.8862455 | -2.0687171 | 91.4956085 |
| C  | -2.1463114 | 0.0593298  | 90.2470794 |
| H  | -3.1709892 | 0.1488001  | 90.6394119 |
| C  | -1.6182132 | 1.0722989  | 89.4599191 |
| C  | 4.1042239  | 0.8117050  | 88.2724069 |
| C  | 4.5712745  | -0.3686016 | 87.7066002 |
| H  | 5.6165085  | -0.4248129 | 87.3678500 |
| C  | 3.7224497  | -1.4921702 | 87.4977561 |

|   |           |            |            |
|---|-----------|------------|------------|
| C | 6.1053674 | 3.7576988  | 89.6393189 |
| C | 5.9490754 | 1.5300053  | 85.0317546 |
| H | 9.1960828 | 4.8293338  | 88.7364112 |
| C | 6.0179862 | 3.9392569  | 87.2419615 |
| C | 8.5839745 | 5.6105143  | 89.2305025 |
| H | 9.1543082 | 6.5622603  | 89.2091524 |
| H | 6.2774508 | 4.4851614  | 86.3203662 |
| C | 4.2913902 | 2.7404394  | 91.9056484 |
| H | 6.1190827 | 0.7110707  | 92.4650795 |
| H | 6.8694334 | 0.5988648  | 90.8375390 |
| C | 5.3590052 | 2.5667493  | 89.6028026 |
| C | 4.2658264 | 3.4009620  | 84.8863883 |
| C | 5.2631866 | 2.7543415  | 87.1469785 |
| H | 6.3346084 | 0.6722732  | 85.6167435 |
| H | 6.8043118 | 2.2116517  | 84.8384732 |
| C | 5.0577568 | 1.8457002  | 90.9153086 |
| C | 4.9344625 | 2.0559965  | 88.3444348 |
| C | 4.8165313 | 2.2682952  | 85.7694700 |
| H | 3.3601900 | 3.1280000  | 91.4482401 |
| H | 3.5538972 | 4.0369019  | 85.4511475 |
| H | 4.9035542 | 3.6066686  | 92.2333598 |
| H | 5.4177420 | 7.0269479  | 88.6730033 |
| H | 5.0648457 | 4.0719149  | 84.5065874 |
| H | 8.4627187 | 5.3198345  | 90.2949306 |
| H | 4.4068808 | 0.9784217  | 90.6842741 |
| H | 3.9846201 | 1.5502205  | 85.9197077 |
| H | 6.4293925 | 4.1480056  | 90.6174639 |
| C | 6.1105733 | 18.4629305 | 86.3190562 |
| C | 6.2034022 | 17.1989803 | 86.9110569 |
| C | 6.7305783 | 17.0682384 | 88.2154339 |
| C | 7.1621600 | 18.2130295 | 88.9174985 |
| C | 7.0691485 | 19.4794790 | 88.3224547 |
| C | 6.5436873 | 19.6030500 | 87.0243193 |
| H | 5.6999341 | 18.5691909 | 85.3032240 |
| H | 5.8750881 | 16.2884421 | 86.3866323 |
| C | 6.8315079 | 15.7297049 | 88.8487859 |
| H | 7.5720618 | 18.1017409 | 89.9350142 |
| H | 7.4059452 | 20.3737038 | 88.8684776 |
| H | 6.4705541 | 20.5967323 | 86.5556435 |
| O | 6.4860627 | 14.6815226 | 88.3232586 |
| H | 7.2666983 | 15.7423730 | 89.8932177 |

|   |            |            |            |
|---|------------|------------|------------|
| C | -0.2990059 | 0.8925520  | 88.9485258 |
| C | 0.5188566  | -0.1949758 | 89.2653279 |
| C | 0.0031970  | -1.1670184 | 90.2017156 |
| C | 0.7965485  | -2.2328822 | 90.7230815 |
| C | -1.3618608 | -1.0481769 | 90.6612842 |
| C | -1.8860838 | -2.0317876 | 91.5522167 |
| C | -2.1445790 | 0.0783362  | 90.2723280 |
| H | -3.1672811 | 0.1786642  | 90.6674465 |
| C | -1.6169705 | 1.0784638  | 89.4686000 |
| C | 4.0993946  | 0.7895107  | 88.2707477 |
| C | 4.5630841  | -0.4016833 | 87.7259574 |
| H | 5.6071441  | -0.4646572 | 87.3850760 |
| C | 3.7127375  | -1.5274470 | 87.5380942 |
| C | 4.1808719  | -2.7008600 | 86.8750092 |
| C | 2.3399246  | -1.4651334 | 87.9756414 |
| C | 1.4797038  | -2.5571936 | 87.6555974 |
| C | 1.8834663  | -0.2886062 | 88.6743054 |
| C | 2.7550189  | 0.8040098  | 88.7548339 |
| O | 0.1455741  | 1.8506705  | 88.0524491 |
| O | 2.3176958  | 1.9799373  | 89.3701344 |
| P | 1.3111637  | 2.9337620  | 88.4950455 |
| O | 0.7863792  | 3.9717111  | 89.4990116 |
| O | 1.9068510  | 3.4089855  | 87.1700697 |
| C | -1.0963880 | -3.0750798 | 92.0102603 |
| C | 0.2609214  | -3.1626645 | 91.6033233 |
| H | -2.9319275 | -1.9345878 | 91.8837991 |
| H | -1.5129268 | -3.8234141 | 92.7014580 |
| H | 1.8503963  | -2.3093403 | 90.4229837 |
| H | 0.8973438  | -3.9719453 | 91.9925799 |
| C | 1.9602816  | -3.6751938 | 86.9888768 |
| C | 3.3260528  | -3.7591562 | 86.6096366 |
| H | 0.4170078  | -2.4984436 | 87.9274417 |
| H | 1.2731530  | -4.4992145 | 86.7433736 |
| H | 3.6972102  | -4.6538686 | 86.0870485 |
| H | 5.2343348  | -2.7378797 | 86.5559336 |
| C | -2.2777800 | 3.3838364  | 90.2181403 |
| C | -2.2680043 | 2.3964923  | 89.1958508 |
| C | -2.7034971 | 4.6966762  | 89.8831610 |
| C | -2.7148167 | 2.7171932  | 87.8827893 |
| C | -3.1543633 | 4.0235448  | 87.6047016 |
| C | -3.1547546 | 5.0349772  | 88.5798661 |
| H | -2.7854202 | 5.4543517  | 90.6792596 |
| C | -2.7501061 | 1.6474891  | 86.7959856 |
| H | -3.4880977 | 4.2665205  | 86.5873878 |
| C | -2.4626970 | 2.1853701  | 85.3887218 |
| H | -3.2886767 | 2.8145259  | 84.9962671 |
| H | -2.3138941 | 1.3468562  | 84.6806140 |
| H | -1.5356900 | 2.7927151  | 85.3764192 |
| C | -4.0922131 | 0.8910877  | 86.8517977 |
| H | -1.9503912 | 0.9146243  | 87.0243736 |
| H | -4.9417874 | 1.5760589  | 86.6484982 |
| H | -4.2560011 | 0.4339743  | 87.8485889 |
| H | -4.1153381 | 0.0805436  | 86.0949335 |
| C | -3.6703640 | 6.4421966  | 88.3115136 |
| C | -3.4778693 | 6.9060004  | 86.8620156 |
| H | -3.7442183 | 7.9775171  | 86.7659321 |
| H | -4.1267421 | 6.3455491  | 86.1565872 |
| H | -2.4263094 | 6.7788809  | 86.5376975 |
| C | -5.1453790 | 6.5502770  | 88.7476848 |
| H | -3.0742468 | 7.1194117  | 88.9641620 |
| H | -5.5144210 | 7.5888878  | 88.6231932 |
| H | -5.2784455 | 6.2656632  | 89.8108313 |
| H | -5.7875516 | 5.8823359  | 88.1359674 |
| C | -1.9055779 | 3.0686383  | 91.6651455 |
| C | -0.9638414 | 4.0935789  | 92.3165056 |
| H | -0.7434100 | 3.7890372  | 93.3596891 |
| H | -1.3940817 | 5.1150234  | 92.3569064 |
| H | -0.0000990 | 4.1504627  | 91.7737661 |
| C | -3.1963611 | 2.8935301  | 92.4916609 |
| H | -1.3748186 | 2.0959424  | 91.6653105 |
| H | -2.9546345 | 2.5889732  | 93.5304294 |

### agg-7-d-ma

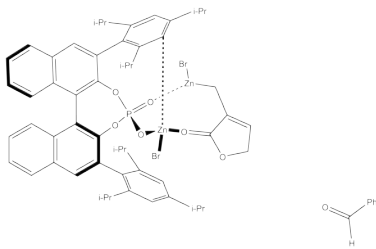

Energy (Hartree) = -11970.009468

|    |            |           |            |
|----|------------|-----------|------------|
| Zn | -0.5059046 | 5.4553302 | 89.2695865 |
| Br | -0.5050551 | 7.4819178 | 90.4108622 |
| H  | 3.6472616  | 6.6008286 | 87.1300300 |
| Br | 1.2733460  | 0.6448564 | 84.8890320 |
| H  | 1.0208487  | 4.7764404 | 83.4387777 |
| Zn | 1.1884955  | 2.9309784 | 85.2885711 |
| C  | 2.4761418  | 6.4011571 | 85.3020759 |
| C  | 2.7570993  | 7.0382989 | 86.6214188 |
| C  | 1.2983208  | 5.7071855 | 85.3648112 |
| C  | 0.6680806  | 4.7195636 | 84.4858757 |
| C  | 0.7775607  | 5.9550757 | 86.7250623 |
| O  | 1.6060239  | 6.7315246 | 87.4328956 |
| O  | -0.2838545 | 5.5242964 | 87.2190996 |
| H  | 2.8779433  | 8.1433819 | 86.6035420 |
| H  | -0.4382028 | 4.7800513 | 84.5169488 |
| H  | 3.1733415  | 6.4367484 | 84.4545654 |

|   |            |            |            |   |            |            |            |
|---|------------|------------|------------|---|------------|------------|------------|
| H | -3.8641661 | 2.1244388  | 92.0536472 | C | 3.5850644  | 5.9780852  | 85.0723587 |
| H | -3.7686115 | 3.8436201  | 92.5413873 | C | 3.8803014  | 6.7085338  | 86.3377831 |
| H | 7.3578928  | 6.0785565  | 87.3826833 | C | 2.3598711  | 5.3748241  | 85.1604256 |
| H | 7.0667223  | 2.1329157  | 91.7634305 | C | 1.6719577  | 4.3787217  | 84.3332886 |
| H | 5.5838447  | 1.0250339  | 84.0561495 | C | 1.8346729  | 5.7600066  | 86.4851503 |
| C | 7.2109011  | 5.7585905  | 88.4384011 | O | 2.7010570  | 6.5320024  | 87.1507544 |
| H | 4.0329923  | 2.2148890  | 92.7914581 | O | 0.7369016  | 5.4384887  | 86.9860905 |
| H | 6.9714093  | 7.8322405  | 89.1292096 | H | 4.0579175  | 7.7998544  | 86.2242033 |
| H | 3.7471340  | 2.8533770  | 83.9492041 | H | 2.0559696  | 4.3350810  | 83.2965682 |
| C | 6.4262446  | 4.4530963  | 88.3979383 | H | 4.2974633  | 5.9053683  | 84.2397974 |
| C | 6.3576160  | 1.3161365  | 91.5129432 | C | 0.1792373  | 0.9797770  | 88.9846424 |
| C | 6.4213271  | 6.8689011  | 89.1554623 | C | 0.8610800  | -0.1718325 | 89.3848266 |
| H | 6.2428356  | 6.6127492  | 90.2203996 | C | 0.2181049  | -1.0233344 | 90.3590887 |
| C | 6.0939411  | 3.7651767  | 89.5778374 | C | 0.8744122  | -2.1383135 | 90.9625257 |
| C | 5.9411905  | 1.4389311  | 85.0215855 | C | -1.1346300 | -0.7253325 | 90.7720472 |
| H | 9.1837325  | 4.7916239  | 88.5292636 | C | -1.7864264 | -1.5880443 | 91.7038157 |
| C | 5.9987023  | 3.9040404  | 87.1784702 | C | -1.7772782 | 0.4556475  | 90.2966417 |
| C | 8.6047779  | 5.5715594  | 89.0632829 | H | -2.7919946 | 0.6901224  | 90.6533122 |
| H | 9.1847623  | 6.5170634  | 89.0300065 | C | -1.1211340 | 1.3410565  | 89.4538350 |
| H | 6.2539875  | 4.4336777  | 86.2461685 | C | 4.5550290  | 0.3417444  | 88.4540619 |
| C | 4.2998631  | 2.7761398  | 91.8721872 | C | 4.8908259  | -0.9207301 | 87.9799394 |
| H | 6.1392528  | 0.7620039  | 92.4493724 | H | 5.9288979  | -1.1225524 | 87.6764117 |
| H | 6.8756317  | 0.6254379  | 90.8170462 | C | 3.9198095  | -1.9495648 | 87.8208827 |
| C | 5.3540772  | 2.5703322  | 89.5647908 | C | 4.2652404  | -3.2017183 | 87.2294365 |
| C | 4.2563189  | 3.3026177  | 84.8273495 | C | 2.5537065  | -1.7093318 | 88.2165726 |
| C | 5.2510090  | 2.7129712  | 87.1062325 | C | 1.5812980  | -2.7131629 | 87.9295619 |
| H | 6.3278419  | 0.5972788  | 85.6284223 | C | 2.2192703  | -0.4524486 | 88.8401148 |
| H | 6.7962461  | 2.1157238  | 84.8114477 | C | 3.2087463  | 0.5364105  | 88.8911786 |
| C | 5.0619857  | 1.8692373  | 90.8899952 | O | 0.7510405  | 1.8291351  | 88.0499246 |
| C | 4.9286548  | 2.0355091  | 88.3170297 | O | 2.8922093  | 1.7876894  | 89.4282317 |
| C | 4.8071929  | 2.1941198  | 85.7396076 | P | 2.0241934  | 2.7944328  | 88.4682507 |
| H | 3.3649671  | 3.1558867  | 91.4163110 | O | 1.6000079  | 3.9465093  | 89.3937978 |
| H | 3.5408826  | 3.9493528  | 85.3750167 | O | 2.7068501  | 3.1181731  | 87.1399000 |
| H | 4.9112633  | 3.6483323  | 92.1848608 | C | -1.1290697 | -2.6832058 | 92.2440736 |
| H | 5.4286195  | 7.0273380  | 88.6866139 | C | 0.2183133  | -2.9471640 | 91.8805977 |
| H | 5.0548657  | 3.9662774  | 84.4334276 | H | -2.8212728 | -1.3545514 | 91.9999381 |
| H | 8.5306602  | 5.2640080  | 90.1272293 | H | -1.6418452 | -3.3366372 | 92.9662065 |
| H | 4.4117497  | 0.9971242  | 90.6755066 | H | 1.9190800  | -2.3510987 | 90.6976265 |
| H | 3.9748420  | 1.4796965  | 85.9042519 | H | 0.7503110  | -3.7974959 | 92.3339250 |
| H | 6.4199756  | 4.1734171  | 90.5479283 | C | 1.9448317  | -3.9121147 | 87.3320983 |
| C | 6.0793447  | 18.6431732 | 86.4649501 | C | 3.3003145  | -4.1692674 | 86.9935788 |
| C | 5.8190345  | 17.4723344 | 87.1841573 | H | 0.5266009  | -2.5223020 | 88.1708985 |
| C | 6.4316643  | 17.2651545 | 88.4393983 | H | 1.1738365  | -4.6660277 | 87.1109211 |
| C | 7.3030162  | 18.2407789 | 88.9653221 | H | 3.5776726  | -5.1267341 | 86.5267881 |
| C | 7.5637943  | 19.4142153 | 88.2434014 | H | 5.3144013  | -3.3753664 | 86.9427061 |
| C | 6.9521750  | 19.6137007 | 86.9940187 | C | -1.5320424 | 3.7484433  | 90.0447178 |
| H | 5.6034086  | 18.8083999 | 85.4860539 | C | -1.6148126 | 2.7032455  | 89.0848814 |
| H | 5.1425069  | 16.6914975 | 86.8035143 | C | -1.8015049 | 5.0775430  | 89.6191112 |
| C | 6.1588673  | 16.0179637 | 89.2013044 | C | -2.0030514 | 2.9870909  | 87.7453806 |
| H | 7.7762032  | 18.0711341 | 89.9468335 | C | -2.2939643 | 4.3131314  | 87.3770568 |
| H | 8.2440776  | 20.1768415 | 88.6523162 | C | -2.1956016 | 5.3788078  | 88.2868764 |
| H | 7.1570105  | 20.5338480 | 86.4250622 | H | -1.8223364 | 5.8867189  | 90.3671663 |
| O | 5.4304259  | 15.1163785 | 88.8218176 | C | -2.1378589 | 1.8631576  | 86.7237598 |
| H | 6.6954250  | 15.9582220 | 90.1980702 | H | -2.5872643 | 4.5245099  | 86.3401683 |

### agg-7-d-mi; COSMO

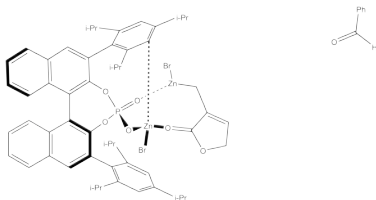

Energy (Hartree)= -11970.02399418

|    |           |           |            |
|----|-----------|-----------|------------|
| Zn | 0.4466487 | 5.5183189 | 89.0190546 |
| Br | 0.7172204 | 7.6089779 | 90.0324188 |
| H  | 4.7402378 | 6.2776403 | 86.8999481 |
| Br | 1.8675383 | 0.3028419 | 84.9984020 |
| H  | 0.5743750 | 4.5337257 | 84.3245248 |
| Zn | 2.0096139 | 2.6151059 | 85.2650142 |

|   |            |            |            |
|---|------------|------------|------------|
| C | 3.5850644  | 5.9780852  | 85.0723587 |
| C | 3.8803014  | 6.7085338  | 86.3377831 |
| C | 2.3598711  | 5.3748241  | 85.1604256 |
| C | 1.6719577  | 4.3787217  | 84.3332886 |
| C | 1.8346729  | 5.7600066  | 86.4851503 |
| O | 2.7010570  | 6.5320024  | 87.1507544 |
| O | 0.7369016  | 5.4384887  | 86.9860905 |
| H | 4.0579175  | 7.7998544  | 86.2242033 |
| H | 2.0559696  | 4.3350810  | 83.2965682 |
| H | 4.2974633  | 5.9053683  | 84.2397974 |
| C | 0.1792373  | 0.9797770  | 88.9846424 |
| C | 0.8610800  | -0.1718325 | 89.3848266 |
| C | 0.2181049  | -1.0233344 | 90.3590887 |
| C | 0.8744122  | -2.1383135 | 90.9625257 |
| C | -1.1346300 | -0.7253325 | 90.7720472 |
| C | -1.7864264 | -1.5880443 | 91.7038157 |
| C | -1.7772782 | 0.4556475  | 90.2966417 |
| H | -2.7919946 | 0.6901224  | 90.6533122 |
| C | -1.1211340 | 1.3410565  | 89.4538350 |
| C | 4.5550290  | 0.3417444  | 88.4540619 |
| C | 4.8908259  | -0.9207301 | 87.9799394 |
| H | 5.9288979  | -1.1225524 | 87.6764117 |
| C | 3.9198095  | -1.9495648 | 87.8208827 |
| C | 4.2652404  | -3.2017183 | 87.2294365 |
| C | 2.5537065  | -1.7093318 | 88.2165726 |
| C | 1.5812980  | -2.7131629 | 87.9295619 |
| C | 2.2192703  | -0.4524486 | 88.8401148 |
| C | 3.2087463  | 0.5364105  | 88.8911786 |
| O | 0.7510405  | 1.8291351  | 88.0499246 |
| O | 2.8922093  | 1.7876894  | 89.4282317 |
| P | 2.0241934  | 2.7944328  | 88.4682507 |
| O | 1.6000079  | 3.9465093  | 89.3937978 |
| O | 2.7068501  | 3.1181731  | 87.1399000 |
| C | -1.1290697 | -2.6832058 | 92.2440736 |
| C | 0.2183133  | -2.9471640 | 91.8805977 |
| H | -2.8212728 | -1.3545514 | 91.9999381 |
| H | -1.6418452 | -3.3366372 | 92.9662065 |
| H | 1.9190800  | -2.3510987 | 90.6976265 |
| H | 0.7503110  | -3.7974959 | 92.3339250 |
| C | 1.9448317  | -3.9121147 | 87.3320983 |
| C | 3.3003145  | -4.1692674 | 86.9935788 |
| H | 0.5266009  | -2.5223020 | 88.1708985 |
| H | 1.1738365  | -4.6660277 | 87.1109211 |
| H | 3.5776726  | -5.1267341 | 86.5267881 |
| H | 5.3144013  | -3.3753664 | 86.9427061 |
| C | -1.5320424 | 3.7484433  | 90.0447178 |
| C | -1.6148126 | 2.7032455  | 89.0848814 |
| C | -1.8015049 | 5.0775430  | 89.6191112 |
| C | -2.0030514 | 2.9870909  | 87.7453806 |
| C | -2.2939643 | 4.3131314  | 87.3770568 |
| C | -2.1956016 | 5.3788078  | 88.2868764 |
| H | -1.8223364 | 5.8867189  | 90.3671663 |
| C | -2.1378589 | 1.8631576  | 86.7237598 |
| H | -2.5872643 | 4.5245099  | 86.3401683 |
| C | -1.7062394 | 2.2651813  | 85.3077105 |
| H | -2.4074771 | 2.9851353  | 84.8370424 |
| H | -1.6540644 | 1.3722661  | 84.6542386 |
| H | -0.6989040 | 2.7267983  | 85.3166184 |
| C | -3.5761744 | 1.3083565  | 86.7454759 |
| H | -1.4648497 | 1.0418874  | 87.0420667 |
| H | -4.3071758 | 2.0909168  | 86.4527576 |
| H | -3.8529902 | 0.9462019  | 87.7563930 |
| H | -3.6772940 | 0.4608771  | 86.0369506 |
| C | -2.5511845 | 6.8131636  | 87.9208596 |
| C | -2.2696386 | 7.1649934  | 86.4542428 |
| H | -2.4219179 | 8.2499809  | 86.2868394 |
| H | -2.9520713 | 6.6296097  | 85.7613156 |
| H | -1.2279301 | 6.9117996  | 86.1749248 |
| C | -4.0189997 | 7.0984581  | 88.2987123 |
| H | -1.9071466 | 7.4635670  | 88.5547144 |
| H | -4.2716775 | 8.1603204  | 88.1015134 |



|   |            |            |            |
|---|------------|------------|------------|
| H | -4.2111974 | 6.8936936  | 89.3712064 |
| H | -4.7089170 | 6.4646031  | 87.7028635 |
| C | -1.2301258 | 3.4833541  | 91.5173773 |
| C | -0.2164999 | 4.4530659  | 92.1441450 |
| H | -0.0486986 | 4.1822577  | 93.2061689 |
| H | -0.5580441 | 5.5081557  | 92.1249662 |
| H | 0.7610939  | 4.3981546  | 91.6260720 |
| C | -2.5543667 | 3.4752370  | 92.3092555 |
| H | -0.7920460 | 2.4680333  | 91.5869130 |
| H | -2.3696908 | 3.2085645  | 93.3699347 |
| H | -3.2791908 | 2.7474651  | 91.8920861 |
| H | -3.0345339 | 4.4759874  | 92.2884176 |
| H | 8.5258380  | 5.1041206  | 87.4798365 |
| H | 7.5476845  | 1.4733479  | 92.0062218 |
| H | 6.1592070  | 0.2339879  | 84.2760534 |
| C | 8.2389594  | 4.9053106  | 88.5362146 |
| H | 4.5159497  | 1.9641208  | 92.9046021 |
| H | 8.1501874  | 7.0499640  | 89.0171646 |
| H | 4.5713824  | 2.2737503  | 84.0529362 |
| C | 7.3162414  | 3.6928424  | 88.5213195 |
| C | 6.7554197  | 0.7354752  | 91.7599981 |
| C | 7.4998847  | 6.1515856  | 89.0589748 |
| H | 7.1792760  | 6.0134713  | 90.1127078 |
| C | 6.8646559  | 3.1022410  | 89.7145664 |
| C | 6.5425805  | 0.6360438  | 85.2367591 |
| H | 10.0744964 | 3.7635768  | 88.9403528 |
| C | 6.8574217  | 3.1522273  | 87.3091446 |
| C | 9.5325878  | 4.6496163  | 89.3283609 |
| H | 10.2120093 | 5.5247140  | 89.2662671 |
| H | 7.2014567  | 3.6092640  | 86.3671091 |
| C | 4.8784562  | 2.4455326  | 91.9727395 |
| H | 6.4368742  | 0.2549602  | 92.7083783 |
| H | 7.2109824  | -0.0437069 | 91.1155094 |
| C | 5.9796714  | 2.0097128  | 89.7208005 |
| C | 5.1082842  | 2.6876669  | 84.9325922 |
| C | 5.9664421  | 2.0630641  | 87.2564399 |
| H | 6.8056807  | -0.2239743 | 85.8831320 |
| H | 7.4799198  | 1.1936780  | 85.0266184 |
| C | 5.5595135  | 1.4092857  | 91.0611493 |
| C | 5.5271338  | 1.4806433  | 88.4799916 |
| C | 5.4949540  | 1.5524380  | 85.8961242 |
| H | 4.0109275  | 2.9087391  | 91.4635974 |
| H | 4.4644984  | 3.4375259  | 85.4358810 |
| H | 5.5795700  | 3.2534811  | 92.2693570 |
| H | 6.5885083  | 6.3587527  | 88.4610303 |
| H | 5.9925628  | 3.2325631  | 84.5402564 |
| H | 9.3209780  | 4.4709288  | 90.4032517 |
| H | 4.8163035  | 0.6119979  | 90.8574598 |
| H | 4.5777843  | 0.9516864  | 86.0631251 |
| H | 7.2098205  | 3.5078179  | 90.6791249 |
| C | -1.5819940 | 15.4826739 | 73.2315976 |
| C | -1.4523482 | 14.8357683 | 74.4650793 |
| C | -2.6039530 | 14.3913620 | 75.1525070 |
| C | -3.8819282 | 14.6012270 | 74.5932964 |
| C | -4.0104395 | 15.2497719 | 73.3565662 |
| C | -2.8607902 | 15.6896147 | 72.6772979 |
| H | -0.6871323 | 15.8304543 | 72.6929311 |
| H | -0.4682553 | 14.6583915 | 74.9258356 |
| C | -2.4723217 | 13.7039610 | 76.4613731 |
| H | -4.7750442 | 14.2510916 | 75.1368525 |
| H | -5.0067252 | 15.4141631 | 72.9185710 |
| H | -2.9603311 | 16.1989890 | 71.7061651 |
| O | -1.4123941 | 13.4745232 | 77.0255440 |
| H | -3.4575997 | 13.3927324 | 76.9227598 |

### agg-7-d-mi

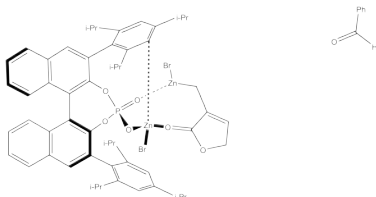

Energy (Hartree)= -11970.00948401

|    |            |            |            |   |            |            |            |
|----|------------|------------|------------|---|------------|------------|------------|
| Zn | 0.4730734  | 5.5387876  | 89.0470574 | H | -2.3809055 | 8.2593963  | 86.2911976 |
| Br | 0.6750520  | 7.6167860  | 90.0721779 | H | -2.9249558 | 6.6472948  | 85.7570430 |
| H  | 4.7951843  | 6.0897442  | 87.0066186 | H | -1.1993078 | 6.9115249  | 86.1775413 |
| Br | 1.8314098  | 0.3184926  | 84.9967124 | C | -3.9941979 | 7.1126217  | 88.2933180 |
| H  | 0.6125218  | 4.5887808  | 84.3456660 | H | -1.8797787 | 7.4606910  | 88.5563984 |
| Zn | 1.9954607  | 2.6182439  | 85.2731050 | H | -4.2396560 | 8.1767231  | 88.0991193 |
| C  | 3.6663543  | 5.9182990  | 85.1493140 | H | -4.1917493 | 6.9060465  | 89.3643712 |
| C  | 3.9765496  | 6.5939857  | 86.4426195 | H | -4.6879133 | 6.4857408  | 87.6945433 |
| C  | 2.4161674  | 5.3644517  | 85.2050234 | C | -1.2617186 | 3.4668733  | 91.5134257 |
| C  | 1.7052971  | 4.4046598  | 84.3575324 | C | -0.2314672 | 4.4164299  | 92.1447266 |
| C  | 1.8848069  | 5.7459167  | 86.5298173 | H | -0.0803214 | 4.1494858  | 93.2103265 |
| O  | 2.7736833  | 6.4643787  | 87.2258947 | H | -0.5446789 | 5.4800674  | 92.1146452 |
| O  | 0.7667611  | 5.4647308  | 87.0059728 | H | 0.7494166  | 4.3348065  | 91.6368773 |
| H  | 4.2221570  | 7.6759616  | 86.3702844 | C | -2.5897512 | 3.4837966  | 92.2981066 |
| H  | 2.0936898  | 4.3619614  | 83.3225178 | H | -0.8444475 | 2.4430424  | 91.5857153 |
| H  | 4.3890272  | 5.8282543  | 84.3275379 | H | -2.4176376 | 3.2140948  | 93.3601681 |
| C  | 0.1729029  | 0.9728544  | 88.9805579 | H | -3.3259317 | 2.7698638  | 91.8765785 |
| C  | 0.8519076  | -0.1789347 | 89.3856475 | H | -3.0520423 | 4.4928122  | 92.2750850 |
| C  | 0.2000552  | -1.0322043 | 90.3524022 | H | 8.4129780  | 5.1757986  | 87.4293919 |
| C  | 0.8507568  | -2.1480296 | 90.9597246 | H | 7.5381093  | 1.5452504  | 92.0012706 |
| C  | -1.1567302 | -0.7361603 | 90.7527109 | H | 6.1841926  | 0.1685339  | 84.3137956 |
| C  | -1.8169853 | -1.6026823 | 91.6742379 | C | 8.1973667  | 4.9354925  | 88.4944247 |
| C  | -1.7941970 | 0.4462456  | 90.2746641 | H | 4.5018849  | 2.0243149  | 92.9073669 |
| H  | -2.8111803 | 0.6820779  | 90.6243641 | H | 8.1728602  | 7.0590084  | 89.0637461 |
| C  | -1.1313779 | 1.3337678  | 89.4394917 | H | 4.5695737  | 2.1810068  | 84.0394300 |
| C  | 4.5505160  | 0.3416023  | 88.4754719 | C | 7.2712853  | 3.7254067  | 88.4944013 |
| C  | 4.8932198  | -0.9230921 | 88.0130462 | C | 6.7492364  | 0.7996185  | 91.7681822 |
| H  | 5.9336302  | -1.1217360 | 87.7157881 | C | 7.5162069  | 6.1662256  | 89.1203497 |
| C  | 3.9270203  | -1.9560065 | 87.8537363 | H | 7.2760124  | 5.9931024  | 90.1898794 |
| C  | 4.2798339  | -3.2103129 | 87.2724481 | C | 6.8262916  | 3.1476641  | 89.6960202 |
| C  | 2.5569540  | -1.7162186 | 88.2352496 | C | 6.5550932  | 0.5955466  | 85.2683810 |
| C  | 1.5890722  | -2.7222321 | 87.9418373 | H | 10.0437867 | 3.7616663  | 88.7120958 |
| C  | 2.2149795  | -0.4580431 | 88.8523758 | C | 6.8227586  | 3.1584615  | 87.2907444 |
| C  | 3.2019336  | 0.5333256  | 88.9070626 | C | 9.5404947  | 4.6307967  | 89.1810327 |
| O  | 0.7509730  | 1.8226138  | 88.0517540 | H | 10.2249069 | 5.5021054  | 89.1191024 |
| O  | 2.8818115  | 1.7841100  | 89.4412682 | H | 7.1654323  | 3.6022524  | 86.3417858 |
| P  | 2.0183364  | 2.7917100  | 88.4782785 | C | 4.8602297  | 2.4984627  | 91.9703206 |
| O  | 1.5850734  | 3.9389167  | 89.4039766 | H | 6.4397569  | 0.3281871  | 92.7240266 |
| O  | 2.7052311  | 3.1184457  | 87.1525786 | H | 7.2072359  | 0.0165657  | 91.1304681 |
| C  | -1.1653688 | -2.6993616 | 92.2169453 | C | 5.9567024  | 2.0437449  | 89.7189035 |
| C  | 0.1855665  | -2.9605746 | 91.8672523 | C | 5.0983943  | 2.6205837  | 84.9108775 |
| H  | -2.8551069 | -1.3709077 | 91.9601559 | C | 5.9478355  | 2.0556172  | 87.2540898 |
| H  | -1.6857310 | -3.3560164 | 92.9306226 | H | 6.8249515  | -0.2472309 | 85.9340187 |
| H  | 1.8981978  | -2.3581701 | 90.7044012 | H | 7.4874080  | 1.1600283  | 85.0546670 |
| H  | 0.7134943  | -3.8121408 | 92.3228447 | C | 5.5452052  | 1.4571765  | 91.0678279 |
| C  | 1.9606533  | -3.9230898 | 87.3542624 | C | 5.5133282  | 1.4885311  | 88.4863855 |
| C  | 3.3193631  | -4.1802391 | 87.0317848 | C | 5.4913116  | 1.5118188  | 85.9014168 |
| H  | 0.5318051  | -2.5302599 | 88.1700067 | H | 3.9896584  | 2.9533479  | 91.4593243 |
| H  | 1.1927208  | -4.6782493 | 87.1273307 | H | 4.4439305  | 3.3735693  | 85.3954450 |
| H  | 3.6029571  | -5.1391039 | 86.5719067 | H | 5.5567454  | 3.3131431  | 92.2590354 |
| H  | 5.3318452  | -3.3827932 | 86.9958536 | H | 6.5632633  | 6.4069117  | 88.6060273 |
| C  | -1.5492368 | 3.7378699  | 90.0384972 | H | 5.9791060  | 3.1669084  | 84.5118610 |
| C  | -1.6198956 | 2.6981777  | 89.0720074 | H | 9.3982787  | 4.3951150  | 90.2563616 |
| C  | -1.8119983 | 5.0686962  | 89.6175174 | H | 4.8071814  | 0.6522707  | 90.8757810 |
| C  | -1.9868839 | 2.9903038  | 87.7279468 | H | 4.5789171  | 0.9048491  | 86.0724852 |
| C  | -2.2673196 | 4.3191971  | 87.3638547 | H | 7.1657222  | 3.5718724  | 90.6546219 |
| C  | -2.1826648 | 5.3791740  | 88.2821393 | C | -1.6376311 | 15.5137048 | 73.1811294 |
| H  | -1.8320101 | 5.8754736  | 90.3680630 | C | -1.4876899 | 14.9378759 | 74.4467921 |
| C  | -2.1085151 | 1.8705815  | 86.6993386 | C | -2.6222395 | 14.4798362 | 75.1517447 |
| H  | -2.5404842 | 4.5384956  | 86.3232962 | C | -3.9036745 | 14.6058059 | 74.5777293 |
| C  | -1.7169220 | 2.2918691  | 85.2775506 | C | -4.0531177 | 15.1831209 | 73.3087813 |
| H  | -2.4537957 | 2.9848077  | 84.8203810 | C | -2.9200413 | 15.6361336 | 72.6118216 |
| H  | -1.6400844 | 1.4029889  | 84.6214046 | H | -0.7553782 | 15.8715589 | 72.6284044 |
| H  | -0.7277599 | 2.7915471  | 85.2690344 | H | -0.5015692 | 14.8258505 | 74.9235187 |
| C  | -3.5287156 | 1.2725749  | 86.7440193 | C | -2.4629804 | 13.8645233 | 76.4956434 |
| H  | -1.4047102 | 1.0676559  | 86.9970331 | H | -4.7840797 | 14.2463940 | 75.1361013 |
| H  | -4.2885386 | 2.0350143  | 86.4726605 | H | -5.0529688 | 15.2815732 | 72.8592491 |
| H  | -3.7747319 | 0.8938782  | 87.7566459 | H | -3.0358374 | 16.0895197 | 71.6150627 |
| H  | -3.6191711 | 0.4279642  | 86.0307138 | O | -1.3976084 | 13.7111830 | 77.0691223 |
| C  | -2.5277176 | 6.8171450  | 87.9192285 | H | -3.4375583 | 13.5333407 | 76.9707150 |
| C  | -2.2394484 | 7.1724361  | 86.4549821 |   |            |            |            |

agg-7-j-ma; COSMO

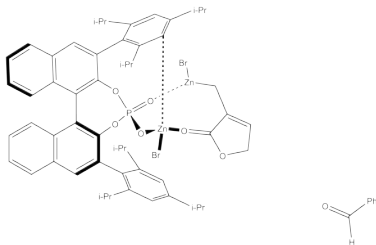

Energy (Hartree)= -11970.02399916

|    |            |            |            |
|----|------------|------------|------------|
| Zn | -0.4795405 | 5.4607878  | 89.2432474 |
| Br | -0.3230267 | 7.5830224  | 90.2133419 |
| H  | 3.3886852  | 6.6169541  | 86.5614187 |
| Br | 0.9468725  | 0.3796026  | 85.0717335 |
| H  | -0.8881240 | 4.4366430  | 84.5827338 |
| Zn | 0.8677980  | 2.6980452  | 85.3109747 |
| C  | 2.0311794  | 6.1966064  | 84.9069210 |
| C  | 2.4235401  | 6.9620915  | 86.1245144 |
| C  | 0.8974629  | 5.4731625  | 85.1600493 |
| C  | 0.2099902  | 4.3999966  | 84.4354748 |
| C  | 0.5219216  | 5.8169727  | 86.5454678 |
| O  | 1.3881210  | 6.6789356  | 87.0893474 |
| O  | -0.4591672 | 5.3909476  | 87.1899104 |
| H  | 2.4796819  | 8.0645685  | 85.9954666 |
| H  | 0.4470653  | 4.3821233  | 83.3549202 |
| H  | 2.6274461  | 6.1871671  | 83.9847929 |
| C  | -0.2036357 | 0.9181614  | 89.2442343 |
| C  | 0.6612111  | -0.1358108 | 89.5495557 |
| C  | 0.2616349  | -1.0421671 | 90.6017963 |
| C  | 1.1234798  | -2.0585626 | 91.1136995 |
| C  | -1.0512743 | -0.9040560 | 91.1905860 |
| C  | -1.4645328 | -1.8249093 | 92.1999037 |
| C  | -1.8903455 | 0.1830716  | 90.8058607 |
| H  | -2.8695804 | 0.2990770  | 91.2951436 |
| C  | -1.4641538 | 1.1278827  | 89.8837548 |
| C  | 4.1031800  | 0.8029799  | 88.1149778 |
| C  | 4.5256566  | -0.4202624 | 87.6084893 |
| H  | 5.5291374  | -0.5007214 | 87.1648114 |
| C  | 3.6768079  | -1.5629938 | 87.5913906 |
| C  | 4.0912476  | -2.7767142 | 86.9650876 |
| C  | 2.3569881  | -1.4810475 | 88.1675133 |
| C  | 1.4852157  | -2.6006055 | 88.0185187 |
| C  | 1.9580593  | -0.2610646 | 88.8259220 |
| C  | 2.8168889  | 0.8408302  | 88.7360343 |
| O  | 0.1288698  | 1.8142242  | 88.2404938 |
| O  | 2.4272960  | 2.0550218  | 89.3089120 |
| P  | 1.3200491  | 2.9328189  | 88.4772670 |
| O  | 0.8923175  | 4.0415578  | 89.4525827 |
| O  | 1.7667290  | 3.3113521  | 87.0655535 |
| C  | -0.6126585 | -2.8232732 | 92.6481810 |
| C  | 0.6977694  | -2.9264567 | 92.1102595 |
| H  | -2.4724658 | -1.7146365 | 92.6301071 |
| H  | -0.9422228 | -3.5226305 | 93.4315350 |
| H  | 2.1427628  | -2.1462623 | 90.7136277 |
| H  | 1.3852927  | -3.6977930 | 92.4896353 |
| C  | 1.9098474  | -3.7592815 | 87.3831043 |
| C  | 3.2293736  | -3.8584606 | 86.8663999 |
| H  | 0.4565755  | -2.5332712 | 88.3985036 |
| H  | 1.2141778  | -4.6050080 | 87.2712945 |
| H  | 3.5571746  | -4.7851547 | 86.3711105 |
| H  | 5.1060045  | -2.8281920 | 86.5399298 |
| C  | -2.0744846 | 3.4788333  | 90.5259869 |
| C  | -2.1622299 | 2.4163356  | 89.5860497 |
| C  | -2.5545054 | 4.7603847  | 90.1418999 |
| C  | -2.7592031 | 2.6314065  | 88.3119129 |
| C  | -3.2509419 | 3.9084672  | 87.9869231 |
| C  | -3.1574241 | 4.9924516  | 88.8756804 |
| H  | -2.5705423 | 5.5727360  | 90.8865487 |

|   |            |            |            |
|---|------------|------------|------------|
| C | -2.8994382 | 1.4811998  | 87.3207060 |
| H | -3.7050545 | 4.0680820  | 86.9999553 |
| C | -2.7442419 | 1.9076753  | 85.8555722 |
| H | -3.5953078 | 2.5245707  | 85.4994314 |
| H | -2.6805190 | 1.0158976  | 85.2015950 |
| H | -1.8140405 | 2.4917202  | 85.7084348 |
| C | -4.2338457 | 0.7472096  | 87.5614259 |
| H | -2.0848165 | 0.7594301  | 87.5316114 |
| H | -5.0954977 | 1.4237886  | 87.3819311 |
| H | -4.3061564 | 0.3741288  | 88.6031020 |
| H | -4.3296794 | -0.1210265 | 86.8777658 |
| C | -3.7283164 | 6.3685280  | 88.5625172 |
| C | -3.6842533 | 6.7319301  | 87.0724829 |
| H | -3.9884412 | 7.7880151  | 86.9291373 |
| H | -4.3801752 | 6.1082608  | 86.4732450 |
| H | -2.6646344 | 6.6031433  | 86.6589202 |
| C | -5.1584052 | 6.4795434  | 89.1290786 |
| H | -3.0913491 | 7.1004473  | 89.1085382 |
| H | -5.5622833 | 7.5001938  | 88.9692098 |
| H | -5.1835758 | 6.2676672  | 90.2170059 |
| H | -5.8373705 | 5.7588611  | 88.6267932 |
| C | -1.5464560 | 3.2732696  | 91.9433950 |
| C | -0.5847128 | 4.3682303  | 92.4299435 |
| H | -0.2436258 | 4.1345151  | 93.4587236 |
| H | -1.0534318 | 5.3729374  | 92.4604994 |
| H | 0.3134109  | 4.4268739  | 91.7842377 |
| C | -2.7409428 | 3.1146965  | 92.9073128 |
| H | -0.9820053 | 2.3197642  | 91.9501676 |
| H | -2.3838464 | 2.8863053  | 93.9322667 |
| H | -3.4208161 | 2.2988706  | 92.5893949 |
| H | -3.3383384 | 4.0492928  | 92.9552091 |
| H | 7.1896744  | 6.0294459  | 86.5193295 |
| H | 7.4045907  | 2.4221885  | 91.1799928 |
| H | 5.0977442  | 0.7643617  | 83.7561885 |
| C | 7.1418284  | 5.7950498  | 87.6059163 |
| H | 4.4958176  | 2.5383802  | 92.5054945 |
| H | 6.9138736  | 7.9135831  | 88.1468387 |
| H | 3.2491692  | 2.5830215  | 83.7308011 |
| C | 6.3824953  | 4.4808876  | 87.7402689 |
| C | 6.6925481  | 1.5787588  | 91.0599106 |
| C | 6.3895565  | 6.9471973  | 88.2973230 |
| H | 6.3076398  | 6.7744705  | 89.3907522 |
| C | 6.1912990  | 3.8725061  | 88.9932074 |
| C | 5.5566537  | 1.2389702  | 84.6481494 |
| H | 9.1370807  | 4.8704174  | 87.6040455 |
| C | 5.8292123  | 3.8489498  | 86.6148860 |
| C | 8.5876970  | 5.6831327  | 88.1206284 |
| H | 9.1401097  | 6.6315295  | 87.9568888 |
| H | 5.9706963  | 4.3180372  | 85.6276812 |
| C | 4.6537473  | 3.0338581  | 91.5251452 |
| H | 6.5813130  | 1.0894319  | 92.0498481 |
| H | 7.1525383  | 0.8477171  | 90.3642017 |
| C | 5.4683363  | 2.6757842  | 89.1416806 |
| C | 3.8490586  | 3.0885108  | 84.5167721 |
| C | 5.0926833  | 2.6520854  | 86.7057617 |
| H | 6.0104511  | 0.4372058  | 85.2626563 |
| H | 6.3796601  | 1.8992809  | 84.3015463 |
| C | 5.3290528  | 2.0673965  | 90.5357889 |
| C | 4.9147782  | 2.0554177  | 87.9871179 |
| C | 4.5041206  | 2.0424884  | 85.4347028 |
| H | 3.6684561  | 3.3652522  | 91.1431358 |
| H | 3.1955610  | 3.7735195  | 85.0945282 |
| H | 5.2764737  | 3.9347505  | 91.7065647 |
| H | 5.3582377  | 7.0506674  | 87.9015826 |
| H | 4.5953700  | 3.7217114  | 83.9924537 |
| H | 8.6127655  | 5.4672304  | 89.2092239 |
| H | 4.6779808  | 1.1736918  | 90.4518317 |
| H | 3.7011564  | 1.3409307  | 85.7398985 |
| H | 6.6172117  | 4.3475542  | 89.8917288 |
| C | 21.6239101 | 28.3697317 | 79.9929562 |
| C | 20.5193391 | 28.0502637 | 80.7896570 |

|   |            |            |            |
|---|------------|------------|------------|
| C | 19.9762939 | 29.0191263 | 81.6629705 |
| C | 20.5497615 | 30.3062748 | 81.7297201 |
| C | 21.6569847 | 30.6252165 | 80.9303342 |
| C | 22.1925850 | 29.6570282 | 80.0629792 |
| H | 22.0497863 | 27.6175915 | 79.3111994 |
| H | 20.0513525 | 27.0541444 | 80.7586516 |
| C | 18.8035632 | 28.6863301 | 82.5097867 |
| H | 20.1196589 | 31.0559649 | 82.4143615 |
| H | 22.1053442 | 31.6291428 | 80.9808152 |
| H | 23.0617726 | 29.9061971 | 79.4345545 |
| O | 18.2374484 | 27.6029871 | 82.5228895 |
| H | 18.4523893 | 29.5356992 | 83.1698968 |

### agg-7-j-ma

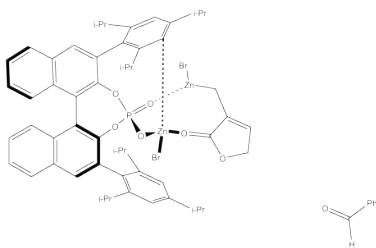

Energy (Hartree) = -11970.00942525

|    |            |            |            |
|----|------------|------------|------------|
| Zn | -0.4639477 | 5.4857679  | 89.2524440 |
| Br | -0.3748100 | 7.5965591  | 90.2255320 |
| H  | 3.4221923  | 6.5169136  | 86.6107450 |
| Br | 0.9289192  | 0.3890378  | 85.0629522 |
| H  | -0.8801086 | 4.4665703  | 84.5811716 |
| Zn | 0.8509916  | 2.6967006  | 85.3076034 |
| C  | 2.0708835  | 6.1707240  | 84.9350201 |
| C  | 2.4758908  | 6.9058173  | 86.1683335 |
| C  | 0.9187627  | 5.4709950  | 85.1710026 |
| C  | 0.2176044  | 4.4156667  | 84.4368973 |
| C  | 0.5383006  | 5.8119090  | 86.5573463 |
| O  | 1.4216474  | 6.6473377  | 87.1164074 |
| O  | -0.4573611 | 5.4066212  | 87.1899421 |
| H  | 2.5736053  | 8.0078900  | 86.0580888 |
| H  | 0.4574247  | 4.3987097  | 83.3570322 |
| H  | 2.6756437  | 6.1512343  | 84.0187633 |
| C  | -0.2075799 | 0.9159502  | 89.2385965 |
| C  | 0.6580523  | -0.1372763 | 89.5444833 |
| C  | 0.2591117  | -1.0444964 | 90.5960523 |
| C  | 1.1211766  | -2.0607654 | 91.1072994 |
| C  | -1.0535797 | -0.9075485 | 91.1850175 |
| C  | -1.4657137 | -1.8294831 | 92.1931114 |
| C  | -1.8923088 | 0.1796577  | 90.8009575 |
| H  | -2.8707377 | 0.2971783  | 91.2917535 |
| C  | -1.4678073 | 1.1252077  | 89.8789299 |
| C  | 4.0977247  | 0.8105598  | 88.1127664 |
| C  | 4.5245788  | -0.4121987 | 87.6093682 |
| H  | 5.5286458  | -0.4884965 | 87.1663510 |
| C  | 3.6804189  | -1.5579421 | 87.5932609 |
| C  | 4.0995154  | -2.7715768 | 86.9710410 |
| C  | 2.3593836  | -1.4788275 | 88.1664866 |
| C  | 1.4914550  | -2.6010929 | 88.0175502 |
| C  | 1.9558137  | -0.2591660 | 88.8225478 |
| C  | 2.8109306  | 0.8456774  | 88.7327845 |
| O  | 0.1241071  | 1.8114461  | 88.2351359 |
| O  | 2.4188218  | 2.0589295  | 89.3047332 |
| P  | 1.3100112  | 2.9355629  | 88.4740959 |
| O  | 0.8754477  | 4.0395501  | 89.4504570 |
| O  | 1.7555135  | 3.3182115  | 87.0628660 |
| C  | -0.6140591 | -2.8276630 | 92.6404538 |
| C  | 0.6958748  | -2.9295214 | 92.1026544 |
| H  | -2.4736311 | -1.7198327 | 92.6234869 |

|   |            |            |            |
|---|------------|------------|------------|
| H | -0.9436869 | -3.5279844 | 93.4228494 |
| H | 2.1399370  | -2.1473813 | 90.7060277 |
| H | 1.3838313  | -3.7007787 | 92.4812421 |
| C | 1.9213569  | -3.7594854 | 87.3861576 |
| C | 3.2418732  | -3.8559781 | 86.8732451 |
| H | 0.4616961  | -2.5349966 | 88.3943310 |
| H | 1.2280420  | -4.6069076 | 87.2736488 |
| H | 3.5736230  | -4.7824921 | 86.3804574 |
| H | 5.1149654  | -2.8202614 | 86.5473692 |
| C | -2.0840224 | 3.4723286  | 90.5295946 |
| C | -2.1665190 | 2.4138915  | 89.5845807 |
| C | -2.5668858 | 4.7531964  | 90.1509702 |
| C | -2.7570744 | 2.6341998  | 88.3082474 |
| C | -3.2482079 | 3.9122826  | 87.9881667 |
| C | -3.1626252 | 4.9913522  | 88.8839013 |
| H | -2.5771158 | 5.5653939  | 90.8957450 |
| C | -2.8877792 | 1.4884879  | 87.3098684 |
| H | -3.6946490 | 4.0775147  | 86.9987253 |
| C | -2.7597520 | 1.9266472  | 85.8456463 |
| H | -3.6331529 | 2.5185312  | 85.5005037 |
| H | -2.6730789 | 1.0408512  | 85.1864277 |
| H | -1.8495572 | 2.5399759  | 85.6922063 |
| C | -4.2029820 | 0.7245769  | 87.5613700 |
| H | -2.0555681 | 0.7822686  | 87.5034111 |
| H | -5.0811191 | 1.3847374  | 87.4021262 |
| H | -4.2526111 | 0.3384421  | 88.5994874 |
| H | -4.2916735 | -0.1382565 | 86.8700030 |
| C | -3.7328335 | 6.3687970  | 88.5748219 |
| C | -3.6930623 | 6.7353424  | 87.0856498 |
| H | -3.9914653 | 7.7935008  | 86.9455695 |
| H | -4.3949897 | 6.1179926  | 86.4866313 |
| H | -2.6756696 | 6.6027059  | 86.6681476 |
| C | -5.1604274 | 6.4825934  | 89.1463301 |
| H | -3.0911008 | 7.0983792  | 89.1185406 |
| H | -5.5642571 | 7.5036582  | 88.9887947 |
| H | -5.1823216 | 6.2704427  | 90.2341821 |
| H | -5.8432453 | 5.7628681  | 88.6478570 |
| C | -1.5526132 | 3.2648813  | 91.9460387 |
| C | -0.5754406 | 4.3504749  | 92.4238738 |
| H | -0.2377639 | 4.1217289  | 93.4549650 |
| H | -1.0270705 | 5.3632474  | 92.4442691 |
| H | 0.3238756  | 4.3900742  | 91.7786263 |
| C | -2.7433695 | 3.1218739  | 92.9164481 |
| H | -0.9988413 | 2.3051269  | 91.9531389 |
| H | -2.3849615 | 2.8935166  | 93.9410129 |
| H | -3.4334321 | 2.3121392  | 92.6046029 |
| H | -3.3318552 | 4.0620428  | 92.9646929 |
| H | 7.1717796  | 6.0404206  | 86.5067208 |
| H | 7.3820379  | 2.4393635  | 91.1736918 |
| H | 5.1302583  | 0.7548048  | 83.7571644 |
| C | 7.1288865  | 5.8049633  | 87.5935459 |
| H | 4.4676006  | 2.5724818  | 92.4991762 |
| H | 6.9217219  | 7.9246954  | 88.1397262 |
| H | 3.2571885  | 2.5512914  | 83.7179132 |
| C | 6.3643537  | 4.4940585  | 87.7304793 |
| C | 6.6647080  | 1.5998020  | 91.0588297 |
| C | 6.3908394  | 6.9620779  | 88.2914085 |
| H | 6.3139451  | 6.7889783  | 89.3849317 |
| C | 6.1655949  | 3.8934960  | 88.9855790 |
| C | 5.5787338  | 1.2400975  | 84.6484940 |
| H | 9.1166034  | 4.8650535  | 87.5772943 |
| C | 5.8208536  | 3.8534334  | 86.6055566 |
| C | 8.5775296  | 5.6817797  | 88.0978235 |
| H | 9.1367937  | 6.6259062  | 87.9328102 |
| H | 5.9697854  | 4.3150957  | 85.6157794 |
| C | 4.6310624  | 3.0649850  | 91.5183995 |
| H | 6.5519190  | 1.1163252  | 92.0514132 |
| H | 7.1203762  | 0.8629890  | 90.3666911 |
| C | 5.4471480  | 2.6950357  | 89.1367689 |
| C | 3.8494614  | 3.0675234  | 84.5023031 |
| C | 5.0882159  | 2.6544548  | 86.6986123 |

|   |            |            |            |   |           |           |           |
|---|------------|------------|------------|---|-----------|-----------|-----------|
| H | 6.0409723  | 0.4477652  | 85.2687555 | C | 3.628787  | -3.239677 | 87.244377 |
| H | 6.3953004  | 1.9088435  | 84.3029517 | C | 2.114964  | -1.555339 | 88.245770 |
| C | 5.3036176  | 2.0930198  | 90.5330874 | C | 1.059960  | -2.509935 | 88.139301 |
| C | 4.9044744  | 2.0653124  | 87.9823026 | C | 1.920007  | -0.230752 | 88.782783 |
| C | 4.5127114  | 2.0332233  | 85.4271067 | C | 2.968267  | 0.687964  | 88.653735 |
| H | 3.6487366  | 3.4018540  | 91.1341046 | O | 0.525445  | 2.076111  | 87.932009 |
| H | 3.1857502  | 3.7459079  | 85.0760345 | O | 2.783450  | 1.998087  | 89.105415 |
| H | 5.2577189  | 3.9628054  | 91.7010623 | P | 1.889891  | 2.981200  | 88.144662 |
| H | 5.3572616  | 7.0745772  | 87.9045732 | O | 1.631586  | 4.231796  | 89.001249 |
| H | 4.5907397  | 3.7071319  | 83.9780872 | O | 2.456327  | 3.146361  | 86.734840 |
| H | 8.6080362  | 5.4629558  | 89.1855555 | C | -1.223708 | -1.942878 | 92.651414 |
| H | 4.6491437  | 1.2017352  | 90.4517996 | C | 0.065902  | -2.326149 | 92.196059 |
| H | 3.7151089  | 1.3242767  | 85.7292721 | H | -2.847333 | -0.525592 | 92.442532 |
| H | 6.5832735  | 4.3753718  | 89.8842038 | H | -1.706123 | -2.499813 | 93.469023 |
| C | 21.6268429 | 28.3772956 | 79.9858981 | H | 1.682764  | -1.944264 | 90.822311 |
| C | 20.5264425 | 28.0453921 | 80.7827282 | H | 0.585170  | -3.171492 | 92.672799 |
| C | 19.9784255 | 29.0044603 | 81.6624164 | C | 1.290329  | -3.776898 | 87.621254 |
| C | 20.5426422 | 30.2943209 | 81.7349139 | C | 2.588568  | -4.154726 | 87.185568 |
| C | 21.6459642 | 30.6261300 | 80.9358706 | H | 0.047114  | -2.226858 | 88.457001 |
| C | 22.1868212 | 29.6673668 | 80.0623011 | H | 0.456935  | -4.491334 | 87.539535 |
| H | 22.0566074 | 27.6322447 | 79.2987881 | H | 2.760772  | -5.164864 | 86.783686 |
| H | 20.0625220 | 27.0474209 | 80.7501220 | H | 4.632761  | -3.508515 | 86.879858 |
| C | 18.8083823 | 28.6525536 | 82.5092783 | C | -1.433115 | 4.303783  | 89.945810 |
| H | 20.1078412 | 31.0366774 | 82.4248242 | C | -1.672179 | 3.192485  | 89.092544 |
| H | 22.0873674 | 31.6328739 | 80.9914943 | C | -1.658133 | 5.609679  | 89.431573 |
| H | 23.0533568 | 29.9263204 | 79.4341793 | C | -2.166948 | 3.392848  | 87.773070 |
| O | 18.2553212 | 27.5656526 | 82.5148526 | C | -2.406396 | 4.701697  | 87.317190 |
| H | 18.4501100 | 29.4963352 | 83.1762450 | C | -2.156094 | 5.828368  | 88.118120 |
|   |            |            |            | H | -1.558028 | 6.476385  | 90.105011 |
|   |            |            |            | C | -2.469460 | 2.200718  | 86.871754 |
|   |            |            |            | H | -2.781899 | 4.848378  | 86.295836 |
|   |            |            |            | C | -2.172590 | 2.458809  | 85.389228 |
|   |            |            |            | H | -2.881715 | 3.180078  | 84.932517 |
|   |            |            |            | H | -2.239513 | 1.514011  | 84.814778 |
|   |            |            |            | H | -1.146876 | 2.855779  | 85.253203 |
|   |            |            |            | C | -3.924446 | 1.739589  | 87.089316 |
|   |            |            |            | H | -1.810244 | 1.368048  | 87.189493 |
|   |            |            |            | H | -4.639959 | 2.539436  | 86.805202 |
|   |            |            |            | H | -4.110101 | 1.479224  | 88.151135 |
|   |            |            |            | H | -4.145673 | 0.844987  | 86.471999 |
|   |            |            |            | C | -2.454928 | 7.249377  | 87.660602 |
|   |            |            |            | C | -2.290042 | 7.459899  | 86.149807 |
|   |            |            |            | H | -2.392447 | 8.535194  | 85.901640 |
|   |            |            |            | H | -3.064506 | 6.916552  | 85.568967 |
|   |            |            |            | H | -1.295709 | 7.115030  | 85.803891 |
|   |            |            |            | C | -3.860830 | 7.665460  | 88.138901 |
|   |            |            |            | H | -1.715822 | 7.903146  | 88.176243 |
|   |            |            |            | H | -4.065400 | 8.722405  | 87.871884 |
|   |            |            |            | H | -3.964412 | 7.563074  | 89.237920 |
|   |            |            |            | H | -4.640646 | 7.033875  | 87.663906 |
|   |            |            |            | C | -1.009475 | 4.138339  | 91.402870 |
|   |            |            |            | C | 0.117230  | 5.082614  | 91.849357 |
|   |            |            |            | H | 0.368378  | 4.887422  | 92.911509 |
|   |            |            |            | H | -0.159299 | 6.153757  | 91.769582 |
|   |            |            |            | H | 1.035835  | 4.918476  | 91.252482 |
|   |            |            |            | C | -2.250345 | 4.287101  | 92.307818 |
|   |            |            |            | H | -0.630948 | 3.103711  | 91.520825 |
|   |            |            |            | H | -1.982689 | 4.095137  | 93.366949 |
|   |            |            |            | H | -3.055305 | 3.580334  | 92.022253 |
|   |            |            |            | H | -2.667020 | 5.314033  | 92.242396 |
|   |            |            |            | H | 8.339678  | 4.774616  | 86.312199 |
|   |            |            |            | H | 7.652155  | 1.607731  | 91.230496 |
|   |            |            |            | H | 5.422574  | -0.219765 | 83.829239 |
|   |            |            |            | C | 8.173491  | 4.669568  | 87.407285 |
|   |            |            |            | H | 4.761927  | 2.368622  | 92.373968 |
|   |            |            |            | H | 8.281907  | 6.842318  | 87.728134 |
|   |            |            |            | H | 3.934828  | 1.888708  | 83.561897 |
|   |            |            |            | C | 7.184398  | 3.525875  | 87.595145 |
|   |            |            |            | C | 6.799106  | 0.903763  | 91.133378 |
|   |            |            |            | C | 7.586240  | 5.998707  | 87.917714 |
|   |            |            |            | H | 7.392994  | 5.957890  | 89.009968 |

### agg-7-j-mi; COSMO

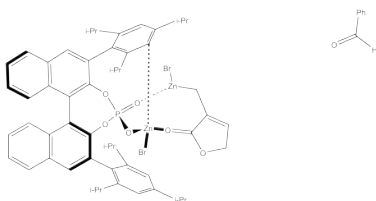

Energy (Hartree) = -11970.02405556

|    |           |           |           |
|----|-----------|-----------|-----------|
| Zn | 0.546364  | 5.844301  | 88.598401 |
| Br | 1.042778  | 7.985872  | 89.396308 |
| C  | 3.316814  | 5.741789  | 84.359712 |
| C  | 2.065331  | 5.247609  | 84.609292 |
| C  | 1.700126  | 5.775687  | 85.938443 |
| O  | 2.680498  | 6.524752  | 86.455212 |
| C  | 3.786547  | 6.539532  | 85.528122 |
| O  | 0.635076  | 5.583256  | 86.561220 |
| C  | 1.230774  | 4.246079  | 83.938512 |
| H  | 4.660121  | 6.080337  | 86.045138 |
| H  | 4.036105  | 7.600275  | 85.309309 |
| Zn | 1.539959  | 2.543452  | 84.987640 |
| Br | 1.218892  | 0.234143  | 84.942721 |
| H  | 1.506227  | 4.088947  | 82.878536 |
| H  | 0.151082  | 4.484172  | 84.018827 |
| H  | 3.938573  | 5.546569  | 83.475904 |
| C  | -0.005110 | 1.346734  | 88.984680 |
| C  | 0.640290  | 0.187338  | 89.421484 |
| C  | 0.040996  | -0.535751 | 90.519630 |
| C  | 0.681883  | -1.640318 | 91.157877 |
| C  | -1.246853 | -0.113669 | 91.022333 |
| C  | -1.860539 | -0.852217 | 92.078413 |
| C  | -1.858176 | 1.066375  | 90.504907 |
| H  | -2.818730 | 1.397892  | 90.928278 |
| C  | -1.231144 | 1.833544  | 89.533901 |
| C  | 4.249945  | 0.366288  | 88.110042 |
| C  | 4.460827  | -0.951742 | 87.723143 |
| H  | 5.449232  | -1.248754 | 87.342025 |
| C  | 3.418880  | -1.921477 | 87.749617 |

|   |           |           |           |   |            |            |            |
|---|-----------|-----------|-----------|---|------------|------------|------------|
| C | 6.825361  | 3.073012  | 88.876836 | C | 0.2663568  | -0.8856644 | 90.4684025 |
| C | 5.920514  | 0.240607  | 84.707607 | C | 0.9812954  | -1.9834290 | 91.0350455 |
| H | 9.969555  | 3.429038  | 87.673808 | C | -1.0371551 | -0.5722688 | 91.0081729 |
| C | 6.576830  | 2.909483  | 86.489280 | C | -1.5895165 | -1.4058219 | 92.0260160 |
| C | 9.536439  | 4.374816  | 88.057350 | C | -1.7245927 | 0.5959001  | 90.5659520 |
| H | 10.256957 | 5.193223  | 87.851377 | H | -2.6961930 | 0.8462226  | 91.0193599 |
| H | 6.848787  | 3.257905  | 85.479624 | C | -1.1596680 | 1.4537529  | 89.6335373 |
| C | 5.052019  | 2.743318  | 91.370499 | C | 4.3791473  | 0.4119349  | 88.0732864 |
| H | 6.554931  | 0.528672  | 92.148968 | C | 4.6679476  | -0.8682660 | 87.6165553 |
| H | 7.141334  | 0.043879  | 90.522146 | H | 5.6684500  | -1.0799053 | 87.2109628 |
| C | 5.888027  | 2.043286  | 89.071326 | C | 3.6901072  | -1.9023046 | 87.5995963 |
| C | 4.579734  | 2.344287  | 84.342815 | C | 3.9755479  | -3.1757008 | 87.0227782 |
| C | 5.627764  | 1.878145  | 86.625712 | C | 2.3713922  | -1.6455544 | 88.1240777 |
| H | 6.197551  | -0.573513 | 85.405407 | C | 1.3767075  | -2.6568789 | 87.9732753 |
| H | 6.862083  | 0.715770  | 84.359542 | C | 2.1006871  | -0.3671115 | 88.7348574 |
| C | 5.576119  | 1.590178  | 90.496365 | C | 3.0874529  | 0.6220294  | 88.6471425 |
| C | 5.283359  | 1.436125  | 87.935479 | O | 0.5560157  | 1.8918648  | 88.0296709 |
| C | 4.995676  | 1.278350  | 85.371015 | O | 2.8285426  | 1.8902925  | 89.1735702 |
| H | 4.163717  | 3.216179  | 90.908246 | P | 1.8632516  | 2.8693201  | 88.2803389 |
| H | 4.034081  | 3.177854  | 84.830190 | O | 1.5363350  | 4.0483330  | 89.2097206 |
| H | 5.823630  | 3.527197  | 91.521181 | O | 2.3985998  | 3.1490469  | 86.8761648 |
| H | 6.621745  | 6.230188  | 87.420619 | C | -0.8807070 | -2.4862201 | 92.5281168 |
| H | 5.449799  | 2.792390  | 83.818460 | C | 0.4224040  | -2.7634741 | 92.0376977 |
| H | 9.447011  | 4.281563  | 89.159830 | H | -2.5890451 | -1.1612483 | 92.4188665 |
| H | 4.772724  | 0.827998  | 90.441599 | H | -1.3173054 | -3.1172260 | 93.3171112 |
| H | 4.067295  | 0.755797  | 85.679837 | H | 1.9934932  | -2.2057020 | 90.6708088 |
| H | 7.288400  | 3.539471  | 89.761174 | H | 0.9983422  | -3.6014886 | 92.4589906 |
| C | -4.568630 | 17.921449 | 80.882738 | C | 1.6800859  | -3.8771590 | 87.3865892 |
| C | -5.871773 | 17.467798 | 80.653112 | C | 2.9941248  | -4.1493023 | 86.9223319 |
| C | -6.597717 | 17.943949 | 79.538423 | H | 0.3517663  | -2.4537394 | 88.3121935 |
| C | -6.006496 | 18.875687 | 78.659663 | H | 0.8915424  | -4.6363628 | 87.2714922 |
| C | -4.699980 | 19.329605 | 78.891076 | H | 3.2243984  | -5.1233037 | 86.4644780 |
| C | -3.982718 | 18.852221 | 80.001983 | H | 4.9899041  | -3.3606022 | 86.6356487 |
| H | -3.999787 | 17.553094 | 81.750278 | C | -1.5073048 | 3.8766038  | 90.1994225 |
| H | -6.358805 | 16.741213 | 81.321775 | C | -1.6861455 | 2.8077316  | 89.2799212 |
| C | -7.981004 | 17.466484 | 79.290391 | C | -1.8154189 | 5.1946198  | 89.7691898 |
| H | -6.580535 | 19.241973 | 77.792457 | C | -2.2014050 | 3.0592821  | 87.9769085 |
| H | -4.237139 | 20.056691 | 78.206535 | C | -2.5203462 | 4.3772977  | 87.6049904 |
| H | -2.956823 | 19.207957 | 80.184960 | C | -2.3332652 | 5.4648572  | 88.4746140 |
| O | -8.578737 | 16.663978 | 79.992610 | H | -1.7510109 | 6.0243914  | 90.4913910 |
| H | -8.467445 | 17.911964 | 78.370896 | C | -2.4394572 | 1.9081034  | 87.0049714 |
|   |           |           |           | H | -2.9087721 | 4.5653828  | 86.5954095 |
|   |           |           |           | C | -2.2093774 | 2.2813043  | 85.5352426 |
|   |           |           |           | H | -2.9901358 | 2.9653921  | 85.1421235 |
|   |           |           |           | H | -2.2113661 | 1.3715207  | 84.9035526 |
|   |           |           |           | H | -1.2252949 | 2.7724817  | 85.3989383 |
|   |           |           |           | C | -3.8468979 | 1.3200546  | 87.2282083 |
|   |           |           |           | H | -1.7082040 | 1.1112617  | 87.2478043 |
|   |           |           |           | H | -4.6307802 | 2.0776535  | 87.0185971 |
|   |           |           |           | H | -3.9784699 | 0.9763268  | 88.2740636 |
|   |           |           |           | H | -4.0186287 | 0.4531551  | 86.5579598 |
|   |           |           |           | C | -2.7172645 | 6.8921247  | 88.1089257 |
|   |           |           |           | C | -2.5942832 | 7.2031086  | 86.6117295 |
|   |           |           |           | H | -2.7516925 | 8.2857310  | 86.4340733 |
|   |           |           |           | H | -3.3543317 | 6.6611150  | 86.0106198 |
|   |           |           |           | H | -1.5918988 | 6.9299111  | 86.2273165 |
|   |           |           |           | C | -4.1326450 | 7.2033732  | 88.6357471 |
|   |           |           |           | H | -2.0024552 | 7.5524746  | 88.6501521 |
|   |           |           |           | H | -4.3983308 | 8.2620490  | 88.4386573 |
|   |           |           |           | H | -4.2089097 | 7.0295489  | 89.7279854 |
|   |           |           |           | H | -4.8891230 | 6.5611893  | 88.1376758 |
|   |           |           |           | C | -1.0555183 | 3.6505820  | 91.6402991 |
|   |           |           |           | C | 0.0386921  | 4.6162459  | 92.1214868 |
|   |           |           |           | H | 0.3101984  | 4.3811189  | 93.1705330 |
|   |           |           |           | H | -0.2770914 | 5.6791219  | 92.0948319 |
|   |           |           |           | H | 0.9556689  | 4.5169123  | 91.5082684 |
|   |           |           |           | C | -2.2868298 | 3.6957539  | 92.5685407 |
|   |           |           |           | H | -0.6321695 | 2.6283002  | 91.6968643 |
|   |           |           |           | H | -1.9960024 | 3.4592227  | 93.6124745 |
|   |           |           |           | H | -3.0651386 | 2.9708505  | 92.2553171 |
|   |           |           |           | H | -2.7498883 | 4.7047129  | 92.5658381 |

### agg-7-j-mi

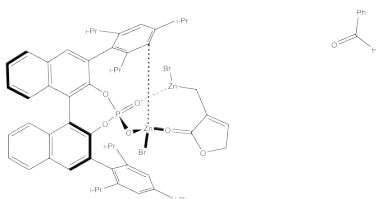

Energy (Hartree)= -11970.00944759

|    |           |            |            |
|----|-----------|------------|------------|
| Zn | 0.3900738 | 5.6395671  | 88.9305567 |
| Br | 0.7034285 | 7.7478024  | 89.8618542 |
| C  | 3.1314590 | 5.8764236  | 84.6916763 |
| C  | 1.8943333 | 5.3312916  | 84.9040619 |
| C  | 1.5142563 | 5.7582784  | 86.2664609 |
| O  | 2.4764629 | 6.4937024  | 86.8357533 |
| C  | 3.5850213 | 6.5912842  | 85.9199850 |
| O  | 0.4553432 | 5.4992356  | 86.8724447 |
| C  | 1.0915909 | 4.3486415  | 84.1728276 |
| H  | 4.4601871 | 6.1004268  | 86.4053665 |
| H  | 3.8234901 | 7.6689797  | 85.7859929 |
| Zn | 1.4810066 | 2.5906353  | 85.1068213 |
| Br | 1.2836787 | 0.2841051  | 84.9253171 |
| H  | 1.3607930 | 4.2714321  | 83.1025433 |
| H  | 0.0046228 | 4.5375300  | 84.2782604 |
| H  | 3.7581077 | 5.7558228  | 83.7981764 |
| C  | 0.0853248 | 1.0740901  | 89.0438767 |
| C  | 0.8057021 | -0.0663168 | 89.4076752 |

|   |            |            |            |    |            |            |            |
|---|------------|------------|------------|----|------------|------------|------------|
| H | 8.1020664  | 5.1914075  | 86.4369529 | H  | -1.1078887 | 5.9025158  | 1.3253191  |
| H | 7.7438068  | 1.7226351  | 91.1984147 | Br | 1.5136125  | 2.2604950  | -2.6566506 |
| H | 5.5358345  | 0.0935034  | 83.7621243 | H  | -2.4663552 | 1.9431869  | -1.3624044 |
| C | 8.0073427  | 4.9881086  | 87.5270283 | Zn | -0.1062689 | 1.2212803  | -1.3690116 |
| H | 4.8288122  | 2.2435862  | 92.4232695 | C  | -2.0023917 | 4.3519637  | 0.0519068  |
| H | 8.0501896  | 7.1295271  | 88.0232171 | C  | -1.9321978 | 5.1560526  | 1.3027615  |
| H | 3.9009793  | 2.1006406  | 83.6031641 | C  | -1.8025303 | 3.0293942  | 0.3401845  |
| C | 7.0857970  | 3.7832810  | 87.6721246 | C  | -1.8163313 | 1.8107685  | -0.4723881 |
| C | 6.9335828  | 0.9726893  | 91.0812946 | C  | -1.5631882 | 2.9858915  | 1.7943514  |
| C | 7.4025980  | 6.2427305  | 88.1833521 | O  | -1.6737956 | 4.1969711  | 2.3511158  |
| H | 7.2838767  | 6.1068639  | 89.2783626 | O  | -1.2971285 | 2.0034590  | 2.5204218  |
| C | 6.7778036  | 3.2486755  | 88.9350587 | H  | -2.8789611 | 5.6866740  | 1.5466977  |
| C | 6.0116959  | 0.5499777  | 84.6544105 | H  | -2.2326761 | 0.9662960  | 0.1124382  |
| H | 9.8651137  | 3.8130873  | 87.5755819 | H  | -2.2127083 | 4.7876689  | -0.9339902 |
| C | 6.5050975  | 3.1777190  | 86.5463352 | C  | -2.7667547 | -3.2213124 | 0.0628251  |
| C | 9.4188940  | 4.7000627  | 88.0682390 | C  | -2.2860394 | -4.5335885 | -0.0340306 |
| H | 10.0929897 | 5.5653297  | 87.8998392 | C  | -2.9271195 | -5.5455120 | 0.7715194  |
| H | 6.7397986  | 3.5874905  | 85.5503482 | C  | -2.4170824 | -6.8731226 | 0.8957418  |
| C | 5.0790615  | 2.6844676  | 91.4362431 | C  | -4.1160749 | -5.1995561 | 1.5137475  |
| H | 6.7335313  | 0.5352410  | 92.0814230 | C  | -4.7816228 | -6.2074162 | 2.2753597  |
| H | 7.3167861  | 0.1665025  | 90.4233733 | C  | -4.5770666 | -3.8521202 | 1.5173521  |
| C | 5.9158854  | 2.1497887  | 89.0928923 | H  | -5.4751581 | -3.6017081 | 2.1025802  |
| C | 4.5239988  | 2.5672803  | 84.3947226 | C  | -3.8938657 | -2.8382268 | 0.8542087  |
| C | 5.6310246  | 2.0781202  | 86.6456084 | C  | -1.1779064 | -4.2391832 | -1.6797334 |
| H | 6.3539714  | -0.2716565 | 85.3131686 | C  | 1.1620214  | -5.3210448 | -2.5520890 |
| H | 6.9144661  | 1.1031813  | 84.3191263 | H  | 2.0400940  | -5.5104436 | -3.1882693 |
| C | 5.6584921  | 1.6106698  | 90.4985963 | C  | 0.0087567  | -6.1430314 | -2.7104160 |
| C | 5.3370166  | 1.5549835  | 87.9374668 | C  | -0.0152098 | -7.1931137 | -3.6772694 |
| C | 5.0258317  | 1.4908973  | 85.3716687 | C  | -1.1808299 | -5.8677251 | -1.9384197 |
| H | 4.1562813  | 3.1246784  | 91.0112229 | C  | -2.3633655 | -6.6098004 | -2.2363646 |
| H | 3.9277785  | 3.3383469  | 84.9241649 | C  | -1.1323618 | -4.8354786 | -0.9291403 |
| H | 5.8030766  | 3.5063682  | 91.6168396 | C  | 0.0321846  | -4.0659280 | -0.8442491 |
| H | 6.3983323  | 6.4711621  | 87.7714252 | O  | -2.1392522 | -2.2129407 | -0.6710237 |
| H | 5.3543961  | 3.0971698  | 83.8820365 | O  | 0.1071156  | -3.0670543 | 0.1269343  |
| H | 9.3982969  | 4.5017361  | 89.1601302 | P  | -0.6950045 | -1.6665722 | -0.1161573 |
| H | 4.9035388  | 0.8026510  | 90.4181658 | O  | -0.8781870 | -1.0727523 | 1.2982989  |
| H | 4.1384305  | 0.8932581  | 85.6644460 | O  | -0.0822517 | -0.7926239 | -1.2064831 |
| H | 7.2226499  | 3.7038044  | 89.8345160 | C  | -4.2787257 | -7.4979041 | 2.3439709  |
| C | -5.3993179 | 17.9531311 | 77.5686553 | C  | -3.0755936 | -7.8246106 | 1.6625526  |
| C | -5.2763694 | 18.2137475 | 78.9371909 | H  | -5.6965204 | -5.9330432 | 2.8238240  |
| C | -5.7335792 | 19.4411830 | 79.4647319 | H  | -4.7979660 | -8.2642273 | 2.9394291  |
| C | -6.3130257 | 20.4007385 | 78.6098625 | H  | -1.4829511 | -7.1378927 | 0.3815575  |
| C | -6.4360568 | 20.1385933 | 77.2380116 | H  | -2.6578537 | -8.8394729 | 1.7465348  |
| C | -5.9790765 | 18.9152207 | 76.7189709 | C  | -2.3587986 | -7.6116987 | -3.1976425 |
| H | -5.0439933 | 16.9973677 | 77.1537045 | C  | -1.1714180 | -7.9218091 | -3.9127573 |
| H | -4.8288479 | 17.4861296 | 79.6318088 | H  | -3.2930804 | -6.3761862 | -1.6997948 |
| C | -5.6030306 | 19.7188279 | 80.9193541 | H  | -3.2859754 | -8.1656517 | -3.4099684 |
| H | -6.6670979 | 21.3564020 | 79.0310597 | H  | -1.1768810 | -8.7246409 | -4.6656103 |
| H | -6.8883262 | 20.8868566 | 76.5693992 | H  | 0.9033159  | -7.3996579 | -4.2487542 |
| H | -6.0749305 | 18.7078220 | 75.6418119 | C  | -4.0952924 | -0.7437175 | 2.2587171  |
| O | -5.1177792 | 18.9514461 | 81.7335656 | C  | -4.2707200 | -1.3960499 | 1.0004834  |
| H | -6.0010407 | 20.7326392 | 81.2339589 | C  | -4.4431046 | 0.6139435  | 2.3678601  |
|   |            |            |            | C  | -4.7819582 | -0.6652150 | -0.1060109 |
|   |            |            |            | C  | -5.1356807 | 0.6872191  | 0.0683565  |
|   |            |            |            | C  | -4.9753357 | 1.3511127  | 1.2942323  |
|   |            |            |            | H  | -4.2979853 | 1.1232895  | 3.3346800  |
|   |            |            |            | C  | -4.9958277 | -1.3030972 | -1.4776961 |
|   |            |            |            | H  | -5.5420574 | 1.2350080  | -0.7943564 |
|   |            |            |            | C  | -4.1931405 | -0.5852777 | -2.5784319 |
|   |            |            |            | H  | -4.5334244 | 0.4627038  | -2.7156110 |
|   |            |            |            | H  | -4.3178583 | -1.1038390 | -3.5512227 |
|   |            |            |            | H  | -3.1126757 | -0.5716636 | -2.3365305 |
|   |            |            |            | C  | -6.4937692 | -1.3780707 | -1.8279310 |
|   |            |            |            | H  | -4.6254823 | -2.3467263 | -1.4292592 |
|   |            |            |            | H  | -6.9425164 | -0.3661535 | -1.9128712 |
|   |            |            |            | H  | -7.0602669 | -1.9332965 | -1.0530007 |
|   |            |            |            | H  | -6.6433832 | -1.8935923 | -2.7991480 |
|   |            |            |            | C  | -5.3863044 | 2.8049048  | 1.5132514  |
|   |            |            |            | C  | -5.5491645 | 3.6154941  | 0.2219815  |
|   |            |            |            | H  | -5.7278896 | 4.6844902  | 0.4567408  |
|   |            |            |            | H  | -6.4174607 | 3.2636512  | -0.3731082 |

## 7.4.2 Pathways starting from 13d-ma

### TS-7-d-ma; COSMO

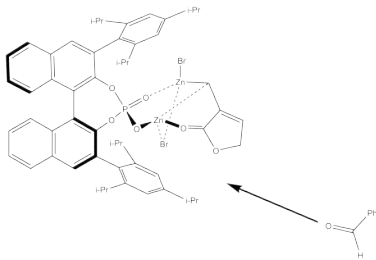

Energy (Hartree) = -11969.99562111

|    |            |           |           |
|----|------------|-----------|-----------|
| Zn | -0.1162907 | 0.4629670 | 2.1432668 |
| Br | 2.0928694  | 0.8095196 | 2.6243543 |

|   |            |            |            |
|---|------------|------------|------------|
| H | -4.6482728 | 3.5510208  | -0.4200999 |
| C | -6.6709685 | 2.8760396  | 2.3643568  |
| H | -4.5709527 | 3.2762528  | 2.1097896  |
| H | -6.9425393 | 3.9284014  | 2.5887642  |
| H | -6.5536225 | 2.3389570  | 3.3267290  |
| H | -7.5201407 | 2.4105679  | 1.8214543  |
| C | -3.6018776 | -1.4729918 | 3.5111131  |
| C | -2.4168710 | -0.7835297 | 4.2101040  |
| H | -2.1728580 | -1.2991323 | 5.1608790  |
| H | -2.6124150 | 0.2816915  | 4.4446444  |
| H | -1.5073579 | -0.8484172 | 3.5774298  |
| C | -4.7691247 | -1.6708663 | 4.5001980  |
| H | -3.2499188 | -2.4778373 | 3.2052795  |
| H | -4.4495778 | -2.2739561 | 5.3750922  |
| H | -5.6237930 | -2.1887567 | 4.0201158  |
| H | -5.1436174 | -0.6961540 | 4.8772089  |
| H | 4.9343847  | 0.6882007  | -2.5708029 |
| H | 5.2246596  | -4.1607239 | 0.8282989  |
| H | 1.6525012  | -3.1947004 | -6.1140700 |
| C | 5.0416353  | 0.1592604  | -1.5984557 |
| H | 2.7337268  | -3.9114192 | 2.8214998  |
| H | 5.3390799  | 2.0340747  | -0.4997507 |
| H | 0.0830684  | -1.3553516 | -5.3271474 |
| C | 4.0826629  | -1.0233804 | -1.6347290 |
| C | 4.3209445  | -4.7918234 | 0.6949181  |
| C | 4.6612771  | 1.1548864  | -0.4881112 |
| H | 4.7284181  | 0.6878419  | 0.5163605  |
| C | 3.9778833  | -1.9102704 | -0.5481962 |
| C | 2.2911474  | -3.0314361 | -5.2208670 |
| H | 6.7849263  | -0.9980108 | -2.2841689 |
| C | 3.2594242  | -1.2510549 | -2.7483500 |
| C | 6.5059507  | -0.2976496 | -1.4706611 |
| H | 7.1955239  | 0.5710898  | -1.5116178 |
| H | 3.3217979  | -0.5518251 | -3.5967237 |
| C | 2.8236577  | -3.1884529 | 1.9843478  |
| H | 4.2852635  | -5.5139085 | 1.5372139  |
| H | 4.4486854  | -5.3648674 | -0.2460497 |
| C | 3.0749632  | -2.9864457 | -0.5464394 |
| C | 0.7492904  | -1.1667154 | -4.4597279 |
| C | 2.3342393  | -2.3102830 | -2.8008767 |
| H | 2.7670099  | -3.9979572 | -4.9571709 |
| H | 3.1023996  | -2.3297667 | -5.5076292 |
| C | 3.0444248  | -3.9297207 | 0.6545918  |
| C | 2.2435588  | -3.1894106 | -1.6824619 |
| C | 1.4641970  | -2.4657870 | -4.0502457 |
| H | 1.9019329  | -2.5760233 | 1.9547505  |
| H | 0.1365155  | -0.7768962 | -3.6253371 |
| H | 3.6664925  | -2.5077085 | 2.2231472  |
| H | 3.6227440  | 1.5167885  | -0.6222941 |
| H | 1.4590326  | -0.3660828 | -4.7507725 |
| H | 6.6823849  | -0.8166821 | -0.5050140 |
| H | 2.1903612  | -4.6247548 | 0.5173140  |
| H | 0.6702733  | -3.2039618 | -3.8198396 |
| H | 4.6152502  | -1.7524120 | 0.3361942  |
| C | 9.6585983  | 15.9555757 | 0.6886400  |
| C | 9.1995156  | 14.7258223 | 1.1720965  |
| C | 9.9776059  | 13.9981616 | 2.1001316  |
| C | 11.2160110 | 14.5136274 | 2.5368857  |
| C | 11.6747747 | 15.7469781 | 2.0518760  |
| C | 10.8959138 | 16.4663688 | 1.1286218  |
| H | 9.0552585  | 16.5251537 | -0.0348552 |
| H | 8.2375887  | 14.2985979 | 0.8489909  |
| C | 9.4937680  | 12.6933098 | 2.6167404  |
| H | 11.8169379 | 13.9389488 | 3.2609999  |
| H | 12.6405217 | 16.1509188 | 2.3919213  |
| H | 11.2550172 | 17.4347876 | 0.7469008  |
| O | 8.4354025  | 12.1683324 | 2.3028264  |
| H | 10.1964570 | 12.1951954 | 3.3506009  |

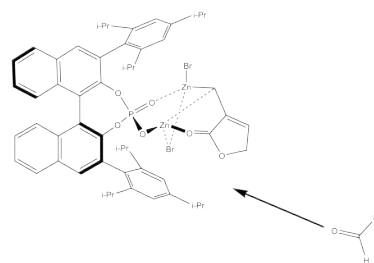

Energy (Hartree)= -11969.97924776  
number of imaginary frequencies: 3

|    |            |            |            |
|----|------------|------------|------------|
| Zn | -0.0941626 | 0.4521327  | 2.1409925  |
| Br | 2.0925701  | 0.8035425  | 2.6717278  |
| H  | -1.1037230 | 5.9006275  | 1.3255252  |
| Br | 1.4952708  | 2.2677105  | -2.6584528 |
| H  | -2.4799030 | 1.9400959  | -1.3616087 |
| Zn | -0.1035335 | 1.2272633  | -1.3682321 |
| C  | -2.0052411 | 4.3519830  | 0.0507337  |
| C  | -1.9280960 | 5.1532429  | 1.3047889  |
| C  | -1.8072468 | 3.0284025  | 0.3356898  |
| C  | -1.8248990 | 1.8109877  | -0.4748093 |
| C  | -1.5593901 | 2.9811553  | 1.7910973  |
| O  | -1.6666356 | 4.1944665  | 2.3495281  |
| O  | -1.2915237 | 1.9979289  | 2.5099833  |
| H  | -2.8740942 | 5.6842617  | 1.5539827  |
| H  | -2.2320818 | 0.9654051  | 0.1144364  |
| H  | -2.2184675 | 4.7878933  | -0.9343051 |
| C  | -2.7676589 | -3.2210369 | 0.0630962  |
| C  | -2.2860969 | -4.5329070 | -0.0331936 |
| C  | -2.9272589 | -5.5447430 | 0.7721978  |
| C  | -2.4170685 | -6.8720613 | 0.8962468  |
| C  | -4.1167798 | -5.1996795 | 1.5135817  |
| C  | -4.7820209 | -6.2081907 | 2.2736382  |
| C  | -4.5778479 | -3.8525508 | 1.5172055  |
| H  | -5.4760332 | -3.6014861 | 2.1020039  |
| C  | -3.8948089 | -2.8384831 | 0.8547237  |
| C  | 1.1784175  | -4.2375846 | -1.6776745 |
| C  | 1.1619246  | -5.3202983 | -2.5488821 |
| H  | 2.0407077  | -5.5083284 | -3.1844739 |
| C  | 0.0091274  | -6.1420994 | -2.7082633 |
| C  | -0.0157996 | -7.1916263 | -3.6750745 |
| C  | -1.1802366 | -5.8666655 | -1.9364623 |
| C  | -2.3626959 | -6.6081974 | -2.2348944 |
| C  | -1.1317660 | -4.8341452 | -0.9274965 |
| C  | 0.0322258  | -4.0634553 | -0.8429130 |
| O  | -2.1422094 | -2.2123649 | -0.6704363 |
| O  | 0.1058427  | -3.0626731 | 0.1265701  |
| P  | -0.6982939 | -1.6645587 | -0.1149489 |
| O  | -0.8878938 | -1.0673379 | 1.2979300  |
| O  | -0.0898900 | -0.7854057 | -1.2032861 |
| C  | -4.2791862 | -7.4981139 | 2.3420485  |
| C  | -3.0758810 | -7.8238378 | 1.6616416  |
| H  | -5.6973701 | -5.9341130 | 2.8214837  |
| H  | -4.7988679 | -8.2646973 | 2.9366811  |
| H  | -1.4828107 | -7.1351223 | 0.3816403  |
| H  | -2.6578516 | -8.8385435 | 1.7453108  |
| C  | -2.3584199 | -7.6094755 | -3.1962178 |
| C  | -1.1716721 | -7.9196722 | -3.9111270 |
| H  | -3.2919104 | -6.3737698 | -1.6979765 |
| H  | -3.2859773 | -8.1625357 | -3.4089941 |
| H  | -1.1772725 | -8.7219438 | -4.6645207 |
| H  | 0.9026118  | -7.3978827 | -4.2467996 |
| C  | -4.0966278 | -0.7435569 | 2.2587798  |
| C  | -4.2718527 | -1.3963242 | 1.0009111  |
| C  | -4.4443679 | 0.6139340  | 2.3672762  |
| C  | -4.7823981 | -0.6655821 | -0.1057974 |
| C  | -5.1367839 | 0.6864396  | 0.0684677  |

TS-7-d-ma



|   |            |            |            |
|---|------------|------------|------------|
| C | -4.9767708 | 1.3505796  | 1.2938280  |
| H | -4.2983336 | 1.1237222  | 3.3337984  |
| C | -4.9939275 | -1.3028736 | -1.4781441 |
| H | -5.5436524 | 1.2333720  | -0.7945274 |
| C | -4.1896171 | -0.5849038 | -2.5774732 |
| H | -4.5298871 | 0.4629787  | -2.7161096 |
| H | -4.3121467 | -1.1027989 | -3.5507133 |
| H | -3.1094881 | -0.5722991 | -2.3347782 |
| C | -6.4911265 | -1.3785471 | -1.8304456 |
| H | -4.6227538 | -2.3460983 | -1.4293502 |
| H | -6.9409830 | -0.3672431 | -1.9158562 |
| H | -7.0586288 | -1.9335808 | -1.0564304 |
| H | -6.6396906 | -1.8937122 | -2.8019117 |
| C | -5.3874783 | 2.8045930  | 1.5126679  |
| C | -5.5497458 | 3.6149920  | 0.2211698  |
| H | -5.7286831 | 4.6844143  | 0.4543264  |
| H | -6.4185757 | 3.2641289  | -0.3735219 |
| H | -4.6491881 | 3.5492365  | -0.4210715 |
| C | -6.6721292 | 2.8772177  | 2.3632025  |
| H | -4.5711958 | 3.2760830  | 2.1082801  |
| H | -6.9444673 | 3.9293805  | 2.5877439  |
| H | -6.5560090 | 2.3396934  | 3.3252482  |
| H | -7.5210088 | 2.4112419  | 1.8207597  |
| C | -3.6030821 | -1.4726202 | 3.5113898  |
| C | -2.4186487 | -0.7832137 | 4.2114632  |
| H | -2.1766255 | -1.2972834 | 5.1635792  |
| H | -2.6125994 | 0.2826966  | 4.4444484  |
| H | -1.5094725 | -0.8494826 | 3.5794188  |
| C | -4.7705680 | -1.6718365 | 4.4995185  |
| H | -3.2500821 | -2.4768071 | 3.2045779  |
| H | -4.4517742 | -2.2747586 | 5.3747707  |
| H | -5.6247741 | -2.1897532 | 4.0190516  |
| H | -5.1470247 | -0.6980073 | 4.8766278  |
| H | 4.9367151  | 0.6859348  | -2.5741274 |
| H | 5.2274479  | -4.1613460 | 0.8270593  |
| H | 1.6482994  | -3.1957355 | -6.1138598 |
| C | 5.0433313  | 0.1579177  | -1.6012445 |
| H | 2.7365950  | -3.9100478 | 2.8214941  |
| H | 5.3362981  | 2.0344154  | -0.5042967 |
| H | 0.0801200  | -1.3552863 | -5.3241098 |
| C | 4.0851549  | -1.0251592 | -1.6374399 |
| C | 4.3234672  | -4.7919666 | 0.6945320  |
| C | 4.6600938  | 1.1542534  | -0.4926190 |
| H | 4.7267272  | 0.6893935  | 0.5128870  |
| C | 3.9807855  | -1.9115022 | -0.5507071 |
| C | 2.2880687  | -3.0326649 | -5.2214688 |
| H | 6.7886270  | -0.9984111 | -2.2841789 |
| C | 3.2607425  | -1.2525986 | -2.7499288 |
| C | 6.5077133  | -0.2978969 | -1.4716878 |
| H | 7.1967591  | 0.5712357  | -1.5112558 |
| H | 3.3227237  | -0.5533403 | -3.5982260 |
| C | 2.8267961  | -3.1879796 | 1.9837093  |
| H | 4.2885151  | -5.5137134 | 1.5371326  |
| H | 4.4516602  | -5.3648263 | -0.2462503 |
| C | 3.0774353  | -2.9867851 | -0.5471433 |
| C | 0.7486428  | -1.1673637 | -4.4584235 |
| C | 2.3351419  | -2.3111459 | -2.8013576 |
| H | 2.7647185  | -3.9989836 | -4.9587833 |
| H | 3.0995701  | -2.3321353 | -5.5094766 |
| C | 3.0472352  | -3.9296063 | 0.6542588  |
| C | 2.2448082  | -3.1890382 | -1.6821076 |
| C | 1.4633778  | -2.4666151 | -4.0496207 |
| H | 1.9051219  | -2.5757211 | 1.9551806  |
| H | 0.1376198  | -0.7768599 | -3.6232893 |
| H | 3.6691293  | -2.5070789 | 2.2232622  |
| H | 3.6221237  | 1.5166308  | -0.6289834 |
| H | 1.4567082  | -0.3659560 | -4.7507304 |
| H | 6.6841496  | -0.8168017 | -0.5060738 |
| H | 2.1930087  | -4.6246992 | 0.5173695  |
| H | 0.6692323  | -3.2044280 | -3.8185194 |
| H | 4.6190651  | -1.7533995 | 0.3329099  |

|   |            |            |            |
|---|------------|------------|------------|
| C | 9.6593620  | 15.9547895 | 0.6891200  |
| C | 9.2012123  | 14.7250378 | 1.1726411  |
| C | 9.9791998  | 13.9982688 | 2.1002649  |
| C | 11.2162874 | 14.5147929 | 2.5362562  |
| C | 11.6745636 | 15.7481036 | 2.0515802  |
| C | 10.8957017 | 16.4666793 | 1.1286207  |
| H | 9.0557258  | 16.5238912 | -0.0345562 |
| H | 8.2403049  | 14.2935278 | 0.8521839  |
| C | 9.4916784  | 12.6915688 | 2.6155172  |
| H | 11.8170909 | 13.9399073 | 3.2605390  |
| H | 12.6400328 | 16.1527146 | 2.3916405  |
| H | 11.2542470 | 17.4352648 | 0.7468414  |
| O | 8.4349991  | 12.1704380 | 2.3008486  |
| H | 10.1959202 | 12.1922914 | 3.3503237  |

### TS-7-d-mi; COSMO

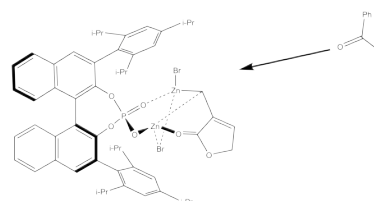

Energy (Hartree)= -11969.98879804

|    |            |            |            |
|----|------------|------------|------------|
| Zn | 2.9594765  | -0.6303436 | -1.2136126 |
| Br | 4.7002746  | -1.3118868 | -2.5143805 |
| C  | 2.9589051  | 4.6838574  | -0.4197994 |
| C  | 2.2291387  | 3.6438459  | -0.9302829 |
| C  | 3.0209685  | 2.4407683  | -0.6292071 |
| O  | 4.1747003  | 2.7279111  | -0.0183419 |
| C  | 4.2304608  | 4.1647041  | 0.1635508  |
| O  | 2.6668950  | 1.2717008  | -0.8610488 |
| C  | 0.9195301  | 3.5100217  | -1.5843523 |
| H  | 5.1457783  | 4.5346165  | -0.3498497 |
| H  | 4.3443120  | 4.3652126  | 1.2512176  |
| Zn | -0.3676302 | 2.5214368  | -0.3877719 |
| Br | -1.6815889 | 3.3733117  | 1.3532916  |
| C  | -0.9204609 | -2.8559168 | 1.0802993  |
| C  | -1.7709136 | -3.6858484 | 0.3401325  |
| C  | -1.7427285 | -5.1035900 | 0.6288528  |
| C  | -2.3985682 | -6.0776965 | -0.1832508 |
| C  | -0.9924042 | -5.5699701 | 1.7703056  |
| C  | -1.0068927 | -6.9587552 | 2.1003541  |
| C  | -0.1910770 | -4.6529296 | 2.5071347  |
| H  | 0.4077121  | -5.0297319 | 3.3504305  |
| C  | -0.0784829 | -3.3177949 | 2.1394133  |
| C  | -2.8564840 | -1.7627214 | -2.8137103 |
| C  | -4.1698809 | -2.1943479 | -2.9535403 |
| H  | -4.7586634 | -1.8564362 | -3.8205453 |
| C  | -4.8015522 | -3.0020216 | -1.9645497 |
| C  | -6.1808579 | -3.3544313 | -2.0734069 |
| C  | -4.0535712 | -3.4248601 | -0.8043603 |
| C  | -4.7545850 | -4.1095660 | 0.2337708  |
| C  | -2.6421540 | -3.1196942 | -0.7277836 |
| C  | -2.1107691 | -2.2663933 | -1.7029892 |
| O  | -0.9061409 | -1.4862983 | 0.8222090  |
| O  | -0.7636071 | -1.9288391 | -1.6668074 |
| P  | -0.1471213 | -0.9323387 | -0.5180969 |
| O  | 1.3457026  | -1.3269215 | -0.4917290 |
| O  | -0.5350440 | 0.5265169  | -0.6900521 |
| C  | -1.6909312 | -7.8718445 | 1.3124786  |
| C  | -2.3725572 | -7.4257349 | 0.1489272  |
| H  | -0.4421262 | -7.2929820 | 2.9849486  |
| H  | -1.6881477 | -8.9411923 | 1.5731155  |
| H  | -2.9232671 | -5.7536414 | -1.0921209 |
| H  | -2.8809804 | -8.1550310 | -0.5000215 |

|   |            |            |            |   |            |            |            |
|---|------------|------------|------------|---|------------|------------|------------|
| C | -6.1025184 | -4.4173078 | 0.1084699  | C | -2.2321168 | -0.7304023 | -3.6961572 |
| C | -6.8202915 | -4.0569405 | -1.0630308 | C | -3.9078938 | 1.0245274  | -2.7792982 |
| H | -4.2165878 | -4.3876083 | 1.1503130  | H | 1.1402569  | -2.2757485 | -3.3939497 |
| H | -6.6189993 | -4.9404703 | 0.9277035  | H | -2.7950911 | 1.7028106  | -1.0239321 |
| H | -7.8856101 | -4.3172094 | -1.1568140 | H | 1.4981980  | -2.0663762 | -5.1394694 |
| H | -6.7335786 | -3.0385510 | -2.9721719 | H | 1.4960138  | 2.5923686  | -4.6411535 |
| C | 2.3320345  | -2.6707602 | 2.4449553  | H | -3.1571928 | 3.0228789  | -2.1916038 |
| C | 0.9569691  | -2.4116980 | 2.7232810  | H | -0.1362569 | 1.3110184  | -7.8853821 |
| C | 3.2957787  | -1.7698035 | 2.9329926  | H | -1.1549865 | -3.1172843 | -3.9426952 |
| C | 0.5873187  | -1.2740779 | 3.4902425  | H | -4.2475744 | 0.1357364  | -2.2129428 |
| C | 1.5949498  | -0.4111209 | 3.9601215  | H | 0.3596528  | -0.2845906 | -5.8992488 |
| C | 2.9557440  | -0.6361461 | 3.6919873  | H | 0.4864505  | 4.4894771  | -1.8608589 |
| H | 4.3618298  | -1.9627375 | 2.7261466  | H | 0.9954716  | 2.8596440  | -2.4812236 |
| C | -0.8654041 | -0.9889270 | 3.8647160  | H | 2.6895258  | 5.7479456  | -0.3962160 |
| H | 1.2990979  | 0.4616740  | 4.5620980  | C | 1.8896430  | 10.9335614 | 3.7380420  |
| C | -1.3184854 | 0.4071688  | 3.4129383  | C | 1.9427555  | 9.6485339  | 3.1872137  |
| H | -0.7613849 | 1.2155842  | 3.9301218  | C | 2.0747588  | 8.5224766  | 4.0309228  |
| H | -2.3952242 | 0.5630755  | 3.6295514  | C | 2.1459390  | 8.6995935  | 5.4298462  |
| H | -1.1767406 | 0.5517071  | 2.3265121  | C | 2.1081378  | 9.9895939  | 5.9794816  |
| C | -1.0937902 | -1.1954858 | 5.3741175  | C | 1.9807122  | 11.1051304 | 5.1335132  |
| H | -1.5008139 | -1.7306523 | 3.3391883  | H | 1.7805475  | 11.8119563 | 3.0835262  |
| H | -0.4946314 | -0.4782813 | 5.9736068  | H | 1.8818873  | 9.4833704  | 2.1005850  |
| H | -0.8113511 | -2.2198500 | 5.6919442  | C | 2.1734897  | 7.1587170  | 3.4509799  |
| H | -2.1617225 | -1.0361162 | 5.6307310  | H | 2.2428231  | 7.8182762  | 6.0851217  |
| C | 4.0570945  | 0.2434235  | 4.2722140  | H | 2.1797721  | 10.1301902 | 7.0689446  |
| C | 3.7025878  | 1.7367970  | 4.3185832  | H | 1.9517357  | 12.1184894 | 5.5638847  |
| H | 4.5709064  | 2.3303625  | 4.6709999  | O | 2.2516744  | 6.9090254  | 2.2550342  |
| H | 2.8653260  | 1.9400764  | 5.0182966  | H | 2.1845940  | 6.3290233  | 4.2194094  |
| H | 3.4074335  | 2.1155257  | 3.3182687  |   |            |            |            |
| C | 4.4596574  | -0.2811253 | 5.6661826  |   |            |            |            |
| H | 4.9416135  | 0.1284792  | 3.6066224  |   |            |            |            |
| H | 5.3028224  | 0.3038931  | 6.0891898  |   |            |            |            |
| H | 4.7674749  | -1.3453161 | 5.6188385  |   |            |            |            |
| H | 3.6049696  | -0.2123955 | 6.3716312  |   |            |            |            |
| C | 2.8075839  | -3.9058076 | 1.6763857  |   |            |            |            |
| C | 3.7204497  | -3.5728001 | 0.4870107  |   |            |            |            |
| H | 4.0772868  | -4.4996252 | -0.0068966 |   |            |            |            |
| H | 4.6186124  | -2.9907908 | 0.7793572  |   |            |            |            |
| H | 3.1664655  | -2.9991256 | -0.2804832 |   |            |            |            |
| C | 3.4878408  | -4.9042803 | 2.6335234  |   |            |            |            |
| H | 1.9160694  | -4.4089508 | 1.2542525  |   |            |            |            |
| H | 3.7665117  | -5.8354466 | 2.0979329  |   |            |            |            |
| H | 2.8205436  | -5.1790721 | 3.4755701  |   |            |            |            |
| H | 4.4130236  | -4.4742793 | 3.0711990  |   |            |            |            |
| H | -0.6690785 | 3.3735542  | -5.6430380 |   |            |            |            |
| H | -0.5041069 | -2.4528539 | -6.8849456 |   |            |            |            |
| H | -5.9742427 | 1.7058536  | -3.0570982 |   |            |            |            |
| C | -0.2350261 | 2.4073539  | -5.9829588 |   |            |            |            |
| H | 1.1909087  | -3.6974426 | -4.4795901 |   |            |            |            |
| H | 1.7444563  | 3.3072802  | -6.2681019 |   |            |            |            |
| H | -4.4391058 | 2.3721892  | -1.1311367 |   |            |            |            |
| C | -0.9231274 | 1.3104901  | -5.1804587 |   |            |            |            |
| C | -0.9997808 | -3.0328579 | -6.0783239 |   |            |            |            |
| C | 1.2797544  | 2.4613295  | -5.7210606 |   |            |            |            |
| H | 1.7861617  | 1.5318840  | -6.0549204 |   |            |            |            |
| C | -0.4942973 | -0.0278303 | -5.2523082 |   |            |            |            |
| C | -5.0827427 | 1.4652297  | -3.6725167 |   |            |            |            |
| H | -1.6342085 | 2.2693117  | -7.6743399 |   |            |            |            |
| C | -2.0314520 | 1.6005354  | -4.3695785 |   |            |            |            |
| C | -0.5415582 | 2.2644050  | -7.4858431 |   |            |            |            |
| H | -0.0871314 | 3.0944746  | -8.0657393 |   |            |            |            |
| H | -2.3829597 | 2.6440045  | -4.3115387 |   |            |            |            |
| C | 0.8834953  | -2.6337445 | -4.4102417 |   |            |            |            |
| H | -0.6906323 | -4.0934658 | -6.1852717 |   |            |            |            |
| H | -2.0943221 | -2.9750995 | -6.2480049 |   |            |            |            |
| C | -1.1198808 | -1.0533726 | -4.5237622 |   |            |            |            |
| C | -3.5509669 | 2.0914433  | -1.7333868 |   |            |            |            |
| C | -2.7040161 | 0.6107820  | -3.6262477 |   |            |            |            |
| H | -5.3658311 | 0.6668414  | -4.3891541 |   |            |            |            |
| H | -4.8277418 | 2.3687715  | -4.2649171 |   |            |            |            |
| C | -0.6233566 | -2.4891419 | -4.6860510 |   |            |            |            |

### TS-7-d-mi

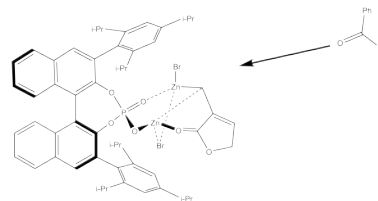

Energy (Hartree) = -11969.97519629  
number of imaginary frequencies: 5

|    |            |            |            |
|----|------------|------------|------------|
| Zn | 2.9604216  | -0.6362812 | -1.2156488 |
| Br | 4.7087467  | -1.3038040 | -2.5025586 |
| C  | 2.9624673  | 4.6854934  | -0.4236234 |
| C  | 2.2304446  | 3.6459960  | -0.9326654 |
| C  | 3.0206162  | 2.4404922  | -0.6293917 |
| O  | 4.1776650  | 2.7285418  | -0.0200831 |
| C  | 4.2341468  | 4.1634651  | 0.1595768  |
| O  | 2.6663550  | 1.2728866  | -0.8569566 |
| C  | 0.9216461  | 3.5111800  | -1.5832149 |
| H  | 5.1502039  | 4.5312698  | -0.3557005 |
| H  | 4.3492508  | 4.3657645  | 1.2470910  |
| Zn | -0.3694208 | 2.5277629  | -0.3774868 |
| Br | -1.6808187 | 3.3707256  | 1.3506826  |
| C  | -0.9204983 | -2.8551729 | 1.0793998  |
| C  | -1.7711333 | -3.6860066 | 0.3400828  |
| C  | -1.7427945 | -5.1036448 | 0.6291649  |
| C  | -2.3982653 | -6.0780994 | -0.1825654 |
| C  | -0.9926619 | -5.5699350 | 1.7705630  |
| C  | -1.0074099 | -6.9583684 | 2.1002078  |
| C  | -0.1919066 | -4.6523749 | 2.5068781  |
| H  | 0.4074394  | -5.0281838 | 3.3502749  |
| C  | -0.0788118 | -3.3175123 | 2.1389616  |
| C  | -2.8565370 | -1.7634519 | -2.8139258 |
| C  | -4.1696730 | -2.1954715 | -2.9533435 |
| H  | -4.7578791 | -1.8566445 | -3.8204271 |
| C  | -4.8017177 | -3.0027842 | -1.9646743 |
| C  | -6.1805984 | -3.3552961 | -2.0727379 |
| C  | -4.0535957 | -3.4254482 | -0.8047236 |

|   |            |            |            |   |            |            |            |
|---|------------|------------|------------|---|------------|------------|------------|
| C | -4.7547346 | -4.1099119 | 0.2332333  | H | -1.6347958 | 2.2688950  | -7.6739556 |
| C | -2.6422211 | -3.1204129 | -0.7282048 | C | -2.0319132 | 1.5993393  | -4.3697967 |
| C | -2.1102948 | -2.2669245 | -1.7031415 | C | -0.5423432 | 2.2648126  | -7.4856503 |
| O | -0.9051938 | -1.4866878 | 0.8213476  | H | -0.0880184 | 3.0945275  | -8.0661147 |
| O | -0.7641471 | -1.9290954 | -1.6672832 | H | -2.3835734 | 2.6427389  | -4.3113084 |
| P | -0.1465625 | -0.9310825 | -0.5190673 | C | 0.8829501  | -2.6340403 | -4.4109323 |
| O | 1.3460433  | -1.3273437 | -0.4906055 | H | -0.6913878 | -4.0937944 | -6.1859445 |
| O | -0.5310504 | 0.5275721  | -0.6948702 | H | -2.0949786 | -2.9753145 | -6.2483095 |
| C | -1.6909047 | -7.8715659 | 1.3129168  | C | -1.1205755 | -1.0538597 | -4.5242182 |
| C | -2.3722173 | -7.4256812 | 0.1498187  | C | -3.5515192 | 2.0904925  | -1.7335979 |
| H | -0.4425066 | -7.2922264 | 2.9848642  | C | -2.7047101 | 0.6098950  | -3.6267179 |
| H | -1.6878505 | -8.9408175 | 1.5738164  | H | -5.3662722 | 0.6663746  | -4.3899759 |
| H | -2.9229143 | -5.7533701 | -1.0911308 | H | -4.8289550 | 2.3672555  | -4.2654214 |
| H | -2.8804796 | -8.1549896 | -0.4991825 | C | -0.6237299 | -2.4894689 | -4.6864871 |
| C | -6.1022632 | -4.4176082 | 0.1080286  | C | -2.2326567 | -0.7310322 | -3.6966724 |
| C | -6.8200151 | -4.0574167 | -1.0628169 | C | -3.9081836 | 1.0237860  | -2.7793692 |
| H | -4.2158940 | -4.3876357 | 1.1492648  | H | 1.1406870  | -2.2765134 | -3.3949663 |
| H | -6.6185581 | -4.9404915 | 0.9274982  | H | -2.7960142 | 1.7035497  | -1.0232315 |
| H | -7.8853861 | -4.3173372 | -1.1565440 | H | 1.4984605  | -2.0676708 | -5.1401792 |
| H | -6.7333684 | -3.0391589 | -2.9713902 | H | 1.4958901  | 2.5918077  | -4.6415182 |
| C | 2.3316306  | -2.6707951 | 2.4448360  | H | -3.1585089 | 3.0226177  | -2.1909714 |
| C | 0.9567776  | -2.4116635 | 2.7231481  | H | -0.1379042 | 1.3114470  | -7.8856881 |
| C | 3.2951302  | -1.7699034 | 2.9328087  | H | -1.1552310 | -3.1172488 | -3.9427375 |
| C | 0.5869528  | -1.2743466 | 3.4901560  | H | -4.2475201 | 0.1348612  | -2.2129884 |
| C | 1.5947749  | -0.4116925 | 3.9597391  | H | 0.3588921  | -0.2851338 | -5.8990383 |
| C | 2.9552294  | -0.6364982 | 3.6917006  | H | 0.4866022  | 4.4903924  | -1.8571839 |
| H | 4.3611734  | -1.9630298 | 2.7256837  | H | 0.9948300  | 2.8597271  | -2.4793645 |
| C | -0.8656147 | -0.9882259 | 3.8638423  | H | 2.6927863  | 5.7493267  | -0.3965808 |
| H | 1.2981597  | 0.4613276  | 4.5609077  | C | 1.8892528  | 10.9339689 | 3.7395679  |
| C | -1.3180258 | 0.4077478  | 3.4117662  | C | 1.9405706  | 9.6489693  | 3.1893641  |
| H | -0.7621141 | 1.2171270  | 3.9285530  | C | 2.0722155  | 8.5235835  | 4.0329691  |
| H | -2.3945564 | 0.5648442  | 3.6268577  | C | 2.1453304  | 8.7020615  | 5.4308696  |
| H | -1.1774511 | 0.5529690  | 2.3254929  | C | 2.1095516  | 9.9918030  | 5.9801944  |
| C | -1.0942510 | -1.1950065 | 5.3730798  | C | 1.9819982  | 11.1065493 | 5.1342031  |
| H | -1.5007621 | -1.7301108 | 3.3382426  | H | 1.7799467  | 11.8121170 | 3.0847612  |
| H | -0.4956041 | -0.4779543 | 5.9731402  | H | 1.8788876  | 9.4802504  | 2.1034067  |
| H | -0.8120212 | -2.2189536 | 5.6919486  | C | 2.1708295  | 7.1590994  | 3.4513645  |
| H | -2.1619755 | -1.0346544 | 5.6294797  | H | 2.2421526  | 7.8206438  | 6.0862024  |
| C | 4.0567449  | 0.2426367  | 4.2726444  | H | 2.1824180  | 10.1328144 | 7.0694978  |
| C | 3.7028931  | 1.7361452  | 4.3196169  | H | 1.9540894  | 12.1200958 | 5.5641317  |
| H | 4.5709873  | 2.3296204  | 4.6731087  | O | 2.2533639  | 6.9108076  | 2.2573661  |
| H | 2.8658618  | 1.9392771  | 5.0195500  | H | 2.1797117  | 6.3287888  | 4.2212146  |
| H | 3.4067512  | 2.1155859  | 3.3200017  |   |            |            |            |
| C | 4.4598426  | -0.2822883 | 5.6660542  |   |            |            |            |
| H | 4.9412456  | 0.1287509  | 3.6065324  |   |            |            |            |
| H | 5.3030072  | 0.3019442  | 6.0902110  |   |            |            |            |
| H | 4.7666976  | -1.3465231 | 5.6183146  |   |            |            |            |
| H | 3.6051458  | -0.2149392 | 6.3713380  |   |            |            |            |
| C | 2.8070280  | -3.9057123 | 1.6759555  |   |            |            |            |
| C | 3.7195395  | -3.5731773 | 0.4865341  |   |            |            |            |
| H | 4.0776454  | -4.4993223 | -0.0074370 |   |            |            |            |
| H | 4.6179882  | -2.9908277 | 0.7771197  |   |            |            |            |
| H | 3.1663479  | -3.0005141 | -0.2818235 |   |            |            |            |
| C | 3.4869809  | -4.9043591 | 2.6328115  |   |            |            |            |
| H | 1.9151351  | -4.4084163 | 1.2540577  |   |            |            |            |
| H | 3.7657858  | -5.8356538 | 2.0975923  |   |            |            |            |
| H | 2.8204901  | -5.1788303 | 3.4754493  |   |            |            |            |
| H | 4.4122059  | -4.4751720 | 3.0709916  |   |            |            |            |
| H | -0.6693559 | 3.3729767  | -5.6424360 |   |            |            |            |
| H | -0.5057312 | -2.4536327 | -6.8855477 |   |            |            |            |
| H | -5.9746364 | 1.7049712  | -3.0573997 |   |            |            |            |
| C | -0.2355514 | 2.4066487  | -5.9829319 |   |            |            |            |
| H | 1.1910626  | -3.6974236 | -4.4799653 |   |            |            |            |
| H | 1.7444385  | 3.3067528  | -6.2682886 |   |            |            |            |
| H | -4.4384497 | 2.3717849  | -1.1302680 |   |            |            |            |
| C | -0.9237977 | 1.3097709  | -5.1804499 |   |            |            |            |
| C | -1.0006845 | -3.0333301 | -6.0783862 |   |            |            |            |
| C | 1.2791396  | 2.4611502  | -5.7212036 |   |            |            |            |
| H | 1.7859537  | 1.5320577  | -6.0551454 |   |            |            |            |
| C | -0.4951560 | -0.0282541 | -5.2523044 |   |            |            |            |
| C | -5.0831307 | 1.4639067  | -3.6725191 |   |            |            |            |

### TS-7-j-ma; COSMO

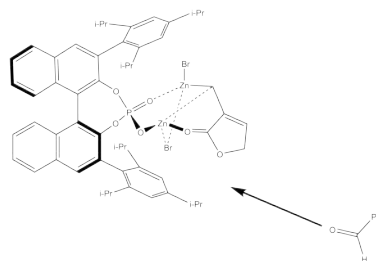

Energy (Hartree) = -11969.98827396

|    |            |            |           |
|----|------------|------------|-----------|
| Zn | 2.1908047  | 0.1464833  | 1.2692725 |
| Br | 3.5824235  | 1.4883476  | 0.0605297 |
| H  | -0.0898621 | 4.1342966  | 4.1079242 |
| Br | -3.5965980 | 2.0962936  | 1.0178020 |
| H  | -2.0699514 | -0.4454843 | 3.6040648 |
| Zn | -1.9899490 | 0.4188282  | 1.2407193 |
| C  | -1.1397997 | 2.2130724  | 4.2086829 |
| C  | -0.0548489 | 3.1455264  | 4.6173676 |
| C  | -0.5972935 | 1.1020527  | 3.6150914 |
| C  | -1.1955433 | -0.0979458 | 3.0208661 |
| C  | 0.8565793  | 1.3455872  | 3.6061841 |
| O  | 1.1698692  | 2.4979545  | 4.2103635 |
| O  | 1.7693817  | 0.6322378  | 3.1316543 |
| H  | 0.0003591  | 3.3326425  | 5.7123609 |
| H  | -0.4647622 | -0.9237277 | 2.9362638 |

|   |            |            |            |   |            |            |            |
|---|------------|------------|------------|---|------------|------------|------------|
| H | -2.2082281 | 2.4233949  | 4.3508537  | H | 4.4045188  | -5.3156581 | 2.7523226  |
| C | -0.2921914 | -4.1294403 | 0.0478346  | H | 2.8453849  | -6.0394141 | 3.2658302  |
| C | -0.1920790 | -4.6704766 | -1.2377688 | H | 3.6707813  | -4.8584230 | 4.3242790  |
| C | 0.4381516  | -5.9628346 | -1.3792883 | H | 0.7319611  | 4.3282323  | -3.9676454 |
| C | 0.7300982  | -6.5525276 | -2.6463349 | H | 3.6747513  | -0.4984217 | -5.7638874 |
| C | 0.8192705  | -6.6873000 | -0.1896531 | H | -4.2003908 | 0.4632402  | -4.7937527 |
| C | 1.3943178  | -7.9879785 | -0.3151362 | C | 1.5962458  | 3.6528682  | -4.1525455 |
| C | 0.6571598  | -6.0795001 | 1.0868856  | H | 4.1983934  | -2.1497856 | -3.0754135 |
| H | 0.9698767  | -6.6360735 | 1.9836235  | H | 2.9574080  | 5.0064726  | -3.0927423 |
| C | 0.1559636  | -4.7905431 | 1.2304551  | H | -3.9536490 | 1.1781356  | -2.3122864 |
| C | -0.4789092 | -1.8170658 | -3.7946971 | C | 1.0637586  | 2.2281436  | -4.0691591 |
| C | -1.2500566 | -2.4176013 | -4.7826897 | C | 3.0944081  | -1.4178469 | -5.5395252 |
| H | -1.4390966 | -1.8746336 | -5.7205836 | C | 2.6512520  | 3.9400230  | -3.0700247 |
| C | -1.8462512 | -3.6981198 | -4.5978713 | H | 3.5649616  | 3.3282683  | -3.2216214 |
| C | -2.7325671 | -4.2454371 | -5.5737753 | C | 1.9262998  | 1.1197609  | -4.1318270 |
| C | -1.5798966 | -4.4442884 | -3.3911208 | C | -3.1138531 | 0.6221766  | -4.9555688 |
| C | -2.2614806 | -5.6832431 | -3.1964446 | H | 1.3594009  | 3.7991194  | -6.3353595 |
| C | -0.6686448 | -3.8935224 | -2.4171955 | C | -0.3107035 | 1.9817244  | -3.9236952 |
| C | -0.2196384 | -2.5833619 | -2.6188456 | C | 2.1353527  | 3.9654305  | -5.5607882 |
| O | -0.9061989 | -2.8872842 | 0.2078403  | H | 2.4733870  | 5.0203113  | -5.6316304 |
| O | 0.5869599  | -1.9827856 | -1.6513555 | H | -0.9944536 | 2.8428663  | -3.8569224 |
| P | -0.0890874 | -1.5379781 | -0.2324598 | C | 3.5269381  | -1.2670516 | -3.0332977 |
| O | 1.1028511  | -1.3240258 | 0.7192347  | H | 3.7882486  | -2.2807846 | -5.6165345 |
| O | -1.1299808 | -0.4230118 | -0.3732743 | H | 2.3208871  | -1.5264550 | -6.3269910 |
| C | 1.6254316  | -8.5477365 | -1.5622591 | C | 1.4536191  | -0.2013274 | -4.0510622 |
| C | 1.3065098  | -7.8123881 | -2.7351602 | C | -2.9162693 | 1.4631276  | -2.5802884 |
| H | 1.6639883  | -8.5331022 | 0.6031715  | C | -0.8393535 | 0.6800306  | -3.8324152 |
| H | 2.0708729  | -9.5506785 | -1.6460876 | H | -2.7703217 | -0.1125081 | -5.7103895 |
| H | 0.4988728  | -5.9952836 | -3.5640548 | H | -2.9800828 | 1.6347361  | -5.3910706 |
| H | 1.5216699  | -8.2425144 | -3.7251500 | C | 2.4583395  | -1.3491574 | -4.1383080 |
| C | -3.1339991 | -6.1779689 | -4.1563829 | C | 0.0551077  | -0.4237150 | -3.9104292 |
| C | -3.3634563 | -5.4621984 | -5.3620993 | C | -2.3426911 | 0.4968898  | -3.6277123 |
| H | -2.0997533 | -6.2423902 | -2.2641111 | H | 3.0611524  | -1.2306935 | -2.0295310 |
| H | -3.6572111 | -7.1298007 | -3.9780167 | H | -2.3210715 | 1.4510166  | -1.6493077 |
| H | -4.0536580 | -5.8667407 | -6.1179447 | H | 4.1592027  | -0.3613684 | -3.1395113 |
| H | -2.9208204 | -3.6686158 | -6.4928411 | H | 2.2675249  | 3.7073554  | -2.0564625 |
| C | 1.3159506  | -3.7417391 | 3.2171547  | H | -2.9527493 | 2.5091552  | -2.9496416 |
| C | 0.1059385  | -4.1188539 | 2.5661553  | H | 3.0019497  | 3.3167248  | -5.8082674 |
| C | 1.2447040  | -3.2125365 | 4.5219885  | H | 1.9051826  | -2.2992725 | -3.9910204 |
| C | -1.1445856 | -3.8976066 | 3.2053529  | H | -2.4977410 | -0.5307250 | -3.2387964 |
| C | -1.1559383 | -3.3633197 | 4.5029787  | H | 3.0098147  | 1.2877840  | -4.2378967 |
| C | 0.0237987  | -3.0424688 | 5.1948217  | C | -1.7681143 | 14.4838539 | -1.0115087 |
| H | 2.1771918  | -2.9428301 | 5.0452137  | C | -1.3195039 | 13.5766805 | -0.0458693 |
| C | -2.4765251 | -4.2749261 | 2.5610824  | C | 0.0077796  | 13.6544747 | 0.4320330  |
| H | -2.1259892 | -3.2149419 | 5.0032220  | C | 0.8777918  | 14.6471097 | -0.0659348 |
| C | -3.3780622 | -3.0451101 | 2.3506992  | C | 0.4265497  | 15.5562509 | -1.0337459 |
| H | -3.6495221 | -2.5667340 | 3.3148591  | C | -0.8953278 | 15.4736663 | -1.5053522 |
| H | -4.3208605 | -3.3305860 | 1.8410149  | H | -2.8014757 | 14.4259934 | -1.3865539 |
| H | -2.8671218 | -2.2871621 | 1.7242162  | H | -1.9752573 | 12.7913714 | 0.3608849  |
| C | -3.1908707 | -5.3688501 | 3.3765878  | C | 0.4872340  | 12.6938340 | 1.4569080  |
| H | -2.2649882 | -4.7036117 | 1.5609471  | H | 1.9120996  | 14.7004171 | 0.3122900  |
| H | -3.4607294 | -5.0077888 | 4.3910394  | H | 1.1036951  | 16.3315498 | -1.4234746 |
| H | -2.5436791 | -6.2608369 | 3.5005102  | H | -1.2506855 | 16.1867056 | -2.2654930 |
| H | -4.1274163 | -5.6878446 | 2.8748154  | O | -0.1905943 | 11.8039145 | 1.9499902  |
| C | -0.0421268 | -2.5598711 | 6.6379800  | H | 1.5653999  | 12.8441735 | 1.7658494  |
| C | -0.6990021 | -1.1718530 | 6.7412206  |   |            |            |            |
| H | -0.7228776 | -0.8196697 | 7.7932839  |   |            |            |            |
| H | -1.7446793 | -1.1949976 | 6.3690081  |   |            |            |            |
| H | -0.1509695 | -0.4223829 | 6.1356367  |   |            |            |            |
| C | -0.7587103 | -3.5945932 | 7.5274665  |   |            |            |            |
| H | 1.0041619  | -2.4676433 | 7.0037784  |   |            |            |            |
| H | -0.7774650 | -3.2696476 | 8.5879821  |   |            |            |            |
| H | -0.2574448 | -4.5825193 | 7.4767346  |   |            |            |            |
| H | -1.8114138 | -3.7409565 | 7.2067837  |   |            |            |            |
| C | 2.6891136  | -3.9536711 | 2.5741145  |   |            |            |            |
| C | 3.5627842  | -2.6873862 | 2.5451966  |   |            |            |            |
| H | 4.5550797  | -2.9093603 | 2.1028509  |   |            |            |            |
| H | 3.7287561  | -2.2507959 | 3.5503913  |   |            |            |            |
| H | 3.0933124  | -1.9135253 | 1.9035790  |   |            |            |            |
| C | 3.4436921  | -5.1064579 | 3.2664385  |   |            |            |            |
| H | 2.5237839  | -4.2488561 | 1.5185472  |   |            |            |            |

### TS-7-j-ma

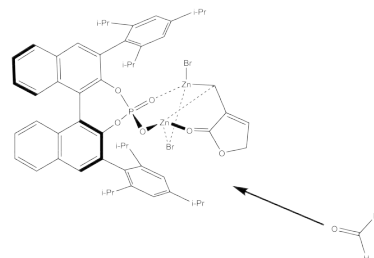

Energy (Hartree)= -11969.97104871  
number of imaginary frequencies: 4

Zn 2.1897554 0.1481269 1.2549525

|    |            |            |            |   |            |            |            |
|----|------------|------------|------------|---|------------|------------|------------|
| Br | 3.5850161  | 1.4903174  | 0.0658133  | H | -1.7445469 | -1.1941452 | 6.3681020  |
| H  | -0.0895502 | 4.1343736  | 4.1073324  | H | -0.1509307 | -0.4239638 | 6.1332149  |
| Br | -3.5939672 | 2.0898452  | 1.0152987  | C | -0.7591445 | -3.5953780 | 7.5274403  |
| H  | -2.0713685 | -0.4448482 | 3.5979089  | H | 1.0030838  | -2.4679550 | 7.0050407  |
| Zn | -1.9925785 | 0.4308305  | 1.2441101  | H | -0.7795754 | -3.2717621 | 8.5882574  |
| C  | -1.1414514 | 2.2120658  | 4.2087957  | H | -0.2574031 | -4.5827547 | 7.4759979  |
| C  | -0.0543174 | 3.1446940  | 4.6161681  | H | -1.8112255 | -3.7438160 | 7.2061423  |
| C  | -0.5976922 | 1.1004356  | 3.6172623  | C | 2.6892138  | -3.9532295 | 2.5743995  |
| C  | -1.1918841 | -0.0981813 | 3.0219814  | C | 3.5637164  | -2.6875379 | 2.5444250  |
| C  | 0.8581459  | 1.3443024  | 3.6062480  | H | 4.5558719  | -2.9103739 | 2.1021484  |
| O  | 1.1699962  | 2.4990518  | 4.2112170  | H | 3.7309259  | -2.2500296 | 3.5490499  |
| O  | 1.7667820  | 0.6320655  | 3.1288419  | H | 3.0946320  | -1.9142996 | 1.9025412  |
| H  | 0.0011747  | 3.3329229  | 5.7116223  | C | 3.4434246  | -5.1063162 | 3.2659854  |
| H  | -0.4615819 | -0.9238398 | 2.9356468  | H | 2.5228260  | -4.2480666 | 1.5188934  |
| H  | -2.2107931 | 2.4220497  | 4.3440344  | H | 4.4044326  | -5.3159013 | 2.7524485  |
| C  | -0.2926936 | -4.1294866 | 0.0482951  | H | 2.8452319  | -6.0391173 | 3.2650561  |
| C  | -0.1924717 | -4.6706372 | -1.2373631 | H | 3.6700611  | -4.8599706 | 4.3242151  |
| C  | 0.4381075  | -5.9628425 | -1.3786454 | H | 0.7318694  | 4.3275665  | -3.9676292 |
| C  | 0.7300251  | -6.5522937 | -2.6455827 | H | 3.6744551  | -0.4987398 | -5.7645509 |
| C  | 0.8192124  | -6.6876076 | -0.1893817 | H | -4.2003062 | 0.4633423  | -4.7935726 |
| C  | 1.3939007  | -7.9878337 | -0.3157524 | C | 1.5963013  | 3.6522752  | -4.1527764 |
| C  | 0.6571097  | -6.0796403 | 1.0867994  | H | 4.1986977  | -2.1496437 | -3.0750750 |
| H  | 0.9695602  | -6.6352934 | 1.9842050  | H | 2.9575894  | 5.0060027  | -3.0926318 |
| C  | 0.1562726  | -4.7908041 | 1.2307043  | H | -3.9534348 | 1.1788505  | -2.3110970 |
| C  | -0.4783108 | -1.8167182 | -3.7939140 | C | 1.0634714  | 2.2276574  | -4.0697901 |
| C  | -1.2491607 | -2.4181618 | -4.7814757 | C | 3.0943891  | -1.4180487 | -5.5396485 |
| H  | -1.4377625 | -1.8736958 | -5.7185719 | C | 2.6509180  | 3.9397322  | -3.0701548 |
| C  | -1.8458756 | -3.6982144 | -4.5974264 | H | 3.5650534  | 3.3286039  | -3.2211332 |
| C  | -2.7320704 | -4.2456302 | -5.5727771 | C | 1.9258553  | 1.1195208  | -4.1323309 |
| C  | -1.5796745 | -4.4445580 | -3.3909903 | C | -3.1138206 | 0.6220865  | -4.9552283 |
| C  | -2.2613681 | -5.6833055 | -3.1969435 | H | 1.3597866  | 3.7986232  | -6.3357021 |
| C  | -0.6688188 | -3.8936356 | -2.4168714 | C | -0.3105005 | 1.9810954  | -3.9241241 |
| C  | -0.2200823 | -2.5831780 | -2.6178686 | C | 2.1350570  | 3.9654958  | -5.5608630 |
| O  | -0.9069768 | -2.8888013 | 0.2099006  | H | 2.4735775  | 5.0201901  | -5.6319344 |
| O  | 0.5849621  | -1.9825687 | -1.6489536 | H | -0.9943924 | 2.8418028  | -3.8559540 |
| P  | -0.0911465 | -1.5383297 | -0.2301542 | C | 3.5269496  | -1.2671889 | -3.0336171 |
| O  | 1.1005602  | -1.3277138 | 0.7240915  | H | 3.7886623  | -2.2805730 | -5.6171316 |
| O  | -1.1310051 | -0.4226411 | -0.3655560 | H | 2.3211969  | -1.5258678 | -6.3272716 |
| C  | 1.6249757  | -8.5472656 | -1.5624260 | C | 1.4536726  | -0.2013497 | -4.0513951 |
| C  | 1.3061020  | -7.8118158 | -2.7345690 | C | -2.9162852 | 1.4627798  | -2.5801383 |
| H  | 1.6637119  | -8.5330837 | 0.6024466  | C | -0.8393938 | 0.6798707  | -3.8329196 |
| H  | 2.0704508  | -9.5501390 | -1.6462962 | H | -2.7706343 | -0.1119066 | -5.7108852 |
| H  | 0.4979883  | -5.9941086 | -3.5624162 | H | -2.9800974 | 1.6342971  | -5.3911633 |
| H  | 1.5212651  | -8.2415310 | -3.7246806 | C | 2.4584493  | -1.3491103 | -4.1385374 |
| C  | -3.1335947 | -6.1776300 | -4.1567908 | C | 0.0553850  | -0.4234349 | -3.9104742 |
| C  | -3.3630047 | -5.4618936 | -5.3618291 | C | -2.3426461 | 0.4968319  | -3.6274997 |
| H  | -2.0990635 | -6.2420746 | -2.2645739 | H | 3.0620406  | -1.2305891 | -2.0296000 |
| H  | -3.6570289 | -7.1293062 | -3.9784518 | H | -2.3213992 | 1.4519864  | -1.6492370 |
| H  | -4.0533931 | -5.8658482 | -6.1177696 | H | 4.1596419  | -0.3618167 | -3.1385863 |
| H  | -2.9205497 | -3.6682575 | -6.4914303 | H | 2.2680564  | 3.7072228  | -2.0564475 |
| C  | 1.3160480  | -3.7412805 | 3.2176292  | H | -2.9529694 | 2.5090510  | -2.9483355 |
| C  | 0.1064076  | -4.1190941 | 2.5665096  | H | 3.0014101  | 3.3169256  | -5.8089857 |
| C  | 1.2445078  | -3.2120925 | 4.5221949  | H | 1.9051397  | -2.2992957 | -3.9915080 |
| C  | -1.1439759 | -3.8977407 | 3.2055856  | H | -2.4980948 | -0.5307743 | -3.2386118 |
| C  | -1.1551299 | -3.3636262 | 4.5029993  | H | 3.0093602  | 1.2876017  | -4.2380055 |
| C  | 0.0239714  | -3.0426777 | 5.1951144  | C | -1.7673678 | 14.4843546 | -1.0114625 |
| H  | 2.1768171  | -2.9416964 | 5.0453679  | C | -1.3187899 | 13.5773356 | -0.0460254 |
| C  | -2.4760789 | -4.2745632 | 2.5613919  | C | 0.0078052  | 13.6550923 | 0.4316094  |
| H  | -2.1252929 | -3.2160437 | 5.0032712  | C | 0.8765156  | 14.6473562 | -0.0665540 |
| C  | -3.3774441 | -3.0448726 | 2.3507008  | C | 0.4258539  | 15.5565047 | -1.0341087 |
| H  | -3.6501062 | -2.5662660 | 3.3144648  | C | -0.8954469 | 15.4739783 | -1.5054973 |
| H  | -4.3201905 | -3.3293341 | 1.8407385  | H | -2.8007388 | 14.4264113 | -1.3865566 |
| H  | -2.8672762 | -2.2877649 | 1.7231132  | H | -1.9715254 | 12.7906693 | 0.3629734  |
| C  | -3.1903501 | -5.3684827 | 3.3766277  | C | 0.4854387  | 12.6917354 | 1.4580713  |
| H  | -2.2642332 | -4.7027017 | 1.5611734  | H | 1.9108349  | 14.6999857 | 0.3121682  |
| H  | -3.4602834 | -5.0084311 | 4.3913544  | H | 1.1030733  | 16.3317337 | -1.4238497 |
| H  | -2.5434144 | -6.2603251 | 3.5009240  | H | -1.2507843 | 16.1869588 | -2.2656762 |
| H  | -4.1271765 | -5.6874361 | 2.8755245  | O | -0.1921241 | 11.8045081 | 1.9491814  |
| C  | -0.0430233 | -2.5602836 | 6.6383227  | H | 1.5657788  | 12.8433212 | 1.7667093  |
| C  | -0.6989906 | -1.1719180 | 6.7405042  |   |            |            |            |
| H  | -0.7233702 | -0.8172812 | 7.7917010  |   |            |            |            |

TS-7-j-mi; COSMO

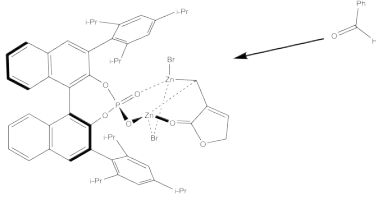

Energy (Hartree)= -11969.9790145

|    |            |            |            |
|----|------------|------------|------------|
| Zn | 1.6774132  | 0.8489409  | 2.6149685  |
| Br | 3.8181721  | 0.9160488  | 3.5384576  |
| C  | 0.1661544  | 4.6439724  | 3.2800779  |
| C  | 0.5198142  | 3.3807097  | 2.9262610  |
| C  | 0.1259189  | 2.5194123  | 4.0579421  |
| O  | -0.4788180 | 3.2314200  | 5.0228803  |
| C  | -0.4845207 | 4.6170814  | 4.6236136  |
| O  | 0.3250495  | 1.3024947  | 4.1567611  |
| C  | 1.1255344  | 2.8731427  | 1.6461500  |
| H  | 0.0579426  | 5.2033365  | 5.3973169  |
| H  | -1.5376058 | 4.9755944  | 4.5996122  |
| Zn | 1.6453581  | 1.6232781  | -0.0711036 |
| Br | 1.4805237  | 3.0294201  | -1.9047473 |
| H  | 2.0008617  | 3.5195395  | 1.4190150  |
| H  | 0.3602203  | 3.1350424  | 0.8750107  |
| H  | 0.2886204  | 5.5589401  | 2.6847207  |
| C  | -1.0499053 | -2.8220776 | 0.2315408  |
| C  | -0.5781233 | -4.1162386 | -0.0252689 |
| C  | -1.3560551 | -5.2179730 | 0.4925214  |
| C  | -0.8866492 | -6.5658905 | 0.4841820  |
| C  | -2.6497356 | -4.9498270 | 1.0761414  |
| C  | -3.4421927 | -6.0408368 | 1.5454372  |
| C  | -3.0903275 | -3.6040874 | 1.2338275  |
| H  | -4.0683537 | -3.4171459 | 1.7034424  |
| C  | -2.2855778 | -2.5252013 | 0.8848687  |
| C  | 3.0309173  | -3.5899692 | -1.2666094 |
| C  | 3.1201897  | -4.5459324 | -2.2711047 |
| H  | 4.0526729  | -4.6305680 | -2.8507182 |
| C  | 2.0038306  | -5.3507506 | -2.6421291 |
| C  | 2.0914373  | -6.2565125 | -3.7419197 |
| C  | 0.7375738  | -5.1764300 | -1.9681827 |
| C  | -0.4025747 | -5.8476226 | -2.5038201 |
| C  | 0.6752700  | -4.3083553 | -0.8114155 |
| C  | 1.8217966  | -3.5706321 | -0.4997633 |
| O  | -0.3097115 | -1.7217396 | -0.1982889 |
| O  | 1.8173603  | -2.7593029 | 0.6389832  |
| P  | 1.0580649  | -1.3228044 | 0.6036100  |
| O  | 0.8437889  | -0.8777652 | 2.0561985  |
| O  | 1.7526010  | -0.2830204 | -0.3033995 |
| C  | -2.9695725 | -7.3432516 | 1.4884230  |
| C  | -1.6723464 | -7.6018760 | 0.9705599  |
| H  | -4.4322143 | -5.8226646 | 1.9758745  |
| H  | -3.5876924 | -8.1737590 | 1.8620245  |
| H  | 0.1182608  | -6.7785454 | 0.0940179  |
| H  | -1.2827737 | -8.6312551 | 0.9598735  |
| C  | -0.2889951 | -6.7038194 | -3.5913302 |
| C  | 0.9713948  | -6.9312262 | -4.2038858 |
| H  | -1.3881996 | -5.6762910 | -2.0512027 |
| H  | -1.1870562 | -7.2046456 | -3.9840561 |
| H  | 1.0522816  | -7.6211487 | -5.0576469 |
| H  | 3.0677620  | -6.3893495 | -4.2340725 |
| C  | -2.6234417 | -0.7493472 | 2.6415507  |
| C  | -2.5945430 | -1.1095388 | 1.2602846  |
| C  | -2.8191133 | 0.6021375  | 2.9798015  |
| C  | -2.7636235 | -0.1073490 | 0.2637007  |
| C  | -2.9548689 | 1.2291840  | 0.6616856  |
| C  | -2.9875259 | 1.6092400  | 2.0135024  |
| H  | -2.8297387 | 0.8846990  | 4.0455591  |
| C  | -2.8063838 | -0.4316258 | -1.2290447 |
| H  | -3.0942191 | 1.9920296  | -0.1185677 |

|   |            |            |            |
|---|------------|------------|------------|
| C | -1.8100985 | 0.4115254  | -2.0438890 |
| H | -2.0701203 | 1.4902670  | -2.0372778 |
| H | -1.7959926 | 0.0849117  | -3.1038354 |
| H | -0.7795676 | 0.3109083  | -1.6526240 |
| C | -4.2418286 | -0.2862115 | -1.7707656 |
| H | -2.5230981 | -1.4955855 | -1.3565050 |
| H | -4.6006094 | 0.7610142  | -1.6856676 |
| H | -4.9502202 | -0.9301487 | -1.2110344 |
| H | -4.2882863 | -0.5721668 | -2.8420370 |
| C | -3.2640602 | 3.0429745  | 2.4549064  |
| C | -2.8445516 | 4.1078311  | 1.4328004  |
| H | -2.9414839 | 5.1254863  | 1.8629912  |
| H | -3.4855694 | 4.0829452  | 0.5275124  |
| H | -1.7953445 | 3.9738178  | 1.1003041  |
| C | -4.7491641 | 3.2062622  | 2.8374580  |
| H | -2.6714290 | 3.2023288  | 3.3837729  |
| H | -4.9544819 | 4.2273970  | 3.2213021  |
| H | -5.0476066 | 2.4764289  | 3.6163009  |
| H | -5.3976293 | 3.0367634  | 1.9526389  |
| C | -2.4601260 | -1.7659173 | 3.7732375  |
| C | -1.2947902 | -1.4324840 | 4.7188141  |
| H | -1.2021965 | -2.2171427 | 5.4981763  |
| H | -1.4340866 | -0.4614486 | 5.2352107  |
| H | -0.3411207 | -1.3779414 | 4.1613294  |
| C | -3.7827477 | -1.9338145 | 4.5452633  |
| H | -2.2214102 | -2.7459131 | 3.3166191  |
| H | -3.6858038 | -2.7186285 | 5.3238245  |
| H | -4.6176272 | -2.2183000 | 3.8720415  |
| H | -4.0752020 | -0.9910286 | 5.0537277  |
| H | 6.4154433  | 1.6981120  | -1.2692919 |
| H | 6.9170453  | -3.3450383 | 1.4143553  |
| H | 3.8056122  | -1.5136355 | -5.5991091 |
| C | 5.9812919  | 1.3424642  | -0.3079942 |
| H | 4.3717286  | -3.7508343 | 3.3279753  |
| H | 5.2616833  | 3.3468075  | 0.2736353  |
| H | 1.6370343  | -0.7522853 | -4.5152674 |
| C | 5.3799125  | -0.0318354 | -0.5817769 |
| C | 6.1080307  | -4.0595158 | 1.1542175  |
| C | 4.8607136  | 2.3297358  | 0.0801357  |
| H | 4.3545946  | 1.9890283  | 1.0095768  |
| C | 5.3288774  | -1.0472370 | 0.3891686  |
| C | 4.3258195  | -1.3385687 | -4.6348186 |
| H | 7.8979699  | 0.6133735  | 0.4858808  |
| C | 4.7796310  | -0.2837255 | -1.8266876 |
| C | 7.1004730  | 1.3399971  | 0.7416361  |
| H | 7.5618719  | 2.3454907  | 0.8180640  |
| H | 4.8214779  | 0.5024204  | -2.5985291 |
| C | 4.3991880  | -2.8904537 | 2.6280428  |
| H | 6.1561820  | -4.9041327 | 1.8729189  |
| H | 6.3235524  | -4.4552739 | 0.1407844  |
| C | 4.6664711  | -2.2652066 | 0.1552237  |
| C | 2.1346890  | -0.6613537 | -3.5272885 |
| C | 4.0777907  | -1.4699629 | -2.1057500 |
| H | 5.2045002  | -2.0142192 | -4.5894415 |
| H | 4.7056653  | -0.2958828 | -4.6529428 |
| C | 4.7293304  | -3.3710807 | 1.2066734  |
| C | 3.9989033  | -2.4646839 | -1.0845870 |
| C | 3.3666491  | -1.5829877 | -3.4567020 |
| H | 3.4169733  | -2.3819459 | 2.6683868  |
| H | 1.3974941  | -0.9180999 | -2.7425967 |
| H | 5.1545644  | -2.1759076 | 3.0138048  |
| H | 4.1177286  | 2.4273075  | -0.7394717 |
| H | 2.4057956  | 0.4042062  | -3.3773202 |
| H | 6.7100814  | 1.0844313  | 1.7484296  |
| H | 3.9762358  | -4.1381653 | 0.9303767  |
| H | 2.9925739  | -2.6188215 | -3.5639171 |
| H | 5.8105285  | -0.8878393 | 1.3639091  |
| C | -4.4312286 | 8.9780955  | -5.5618374 |
| C | -4.2640379 | 8.7907371  | -4.1858959 |
| C | -4.9059196 | 9.6577956  | -3.2732130 |
| C | -5.7141285 | 10.7099608 | -3.7518482 |

|   |            |            |            |
|---|------------|------------|------------|
| C | -5.8818202 | 10.8959246 | -5.1315967 |
| C | -5.2401445 | 10.0303497 | -6.0346678 |
| H | -3.9321349 | 8.3053084  | -6.2760561 |
| H | -3.6396502 | 7.9793677  | -3.7808594 |
| C | -4.7288346 | 9.4606738  | -1.8122894 |
| H | -6.2108917 | 11.3816298 | -3.0321197 |
| H | -6.5125117 | 11.7160025 | -5.5072569 |
| H | -5.3704264 | 10.1759169 | -7.1183193 |
| O | -4.0577523 | 8.5733431  | -1.3056698 |
| H | -5.2800708 | 10.2155631 | -1.1728473 |

### TS-7-j-mi

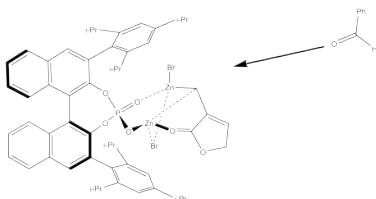

Energy (Hartree) = -11969.96339448  
 number of imaginary frequencies: 5

|    |            |            |            |
|----|------------|------------|------------|
| Zn | 1.6817197  | 0.8471047  | 2.6156395  |
| Br | 3.8213104  | 0.9119720  | 3.5375599  |
| C  | 0.1792525  | 4.6448009  | 3.2828883  |
| C  | 0.5287188  | 3.3816340  | 2.9263911  |
| C  | 0.1326682  | 2.5193035  | 4.0595623  |
| O  | -0.4691423 | 3.2347379  | 5.0268781  |
| C  | -0.4696616 | 4.6185560  | 4.6285866  |
| O  | 0.3287317  | 1.3047922  | 4.1568660  |
| C  | 1.1320568  | 2.8715929  | 1.6467541  |
| H  | 0.0760705  | 5.2022195  | 5.4025978  |
| H  | -1.5218614 | 4.9807395  | 4.6063609  |
| Zn | 1.6563300  | 1.6229978  | -0.0712213 |
| Br | 1.4959130  | 3.0334806  | -1.8996564 |
| H  | 2.0063582  | 3.5184901  | 1.4174297  |
| H  | 0.3653586  | 3.1315588  | 0.8762423  |
| H  | 0.3006725  | 5.5604856  | 2.6883133  |
| C  | -1.0507438 | -2.8128740 | 0.2246913  |
| C  | -0.5829696 | -4.1084063 | -0.0325772 |
| C  | -1.3653562 | -5.2077044 | 0.4832457  |
| C  | -0.9006568 | -6.5569788 | 0.4734581  |
| C  | -2.6585358 | -4.9359572 | 1.0658730  |
| C  | -3.4544888 | -6.0250137 | 1.5327298  |
| C  | -3.0943936 | -3.5889822 | 1.2244353  |
| H  | -4.0719264 | -3.3988980 | 1.6937929  |
| C  | -2.2860064 | -2.5125146 | 0.8771981  |
| C  | 3.0298531  | -3.5917756 | -1.2661160 |
| C  | 3.1180364  | -4.5473565 | -2.2708179 |
| H  | 4.0516670  | -4.6340525 | -2.8482423 |
| C  | 2.0004958  | -5.3488726 | -2.6449865 |
| C  | 2.0871897  | -6.2543605 | -3.7446013 |
| C  | 0.7334078  | -5.1714311 | -1.9737424 |
| C  | -0.4071894 | -5.8393424 | -2.5119088 |
| C  | 0.6710832  | -4.3039337 | -0.8166929 |
| C  | 1.8190977  | -3.5698295 | -0.5020446 |
| O  | -0.3068687 | -1.7149348 | -0.2030679 |
| O  | 1.8154195  | -2.7598016 | 0.6366489  |
| P  | 1.0614160  | -1.3211354 | 0.6017299  |
| O  | 0.8452933  | -0.8772162 | 2.0541227  |
| O  | 1.7602832  | -0.2832588 | -0.3038744 |
| C  | -2.9864810 | -7.3285400 | 1.4744385  |
| C  | -1.6900989 | -7.5906846 | 0.9575447  |
| H  | -4.4441115 | -5.8041596 | 1.9626839  |
| H  | -3.6077543 | -8.1573990 | 1.8463820  |
| H  | 0.1037927  | -6.7721206 | 0.0836831  |

|   |            |            |            |
|---|------------|------------|------------|
| H | -1.3039728 | -8.6212986 | 0.9457610  |
| C | -0.2937643 | -6.6952749 | -3.5992000 |
| C | 0.9667648  | -6.9257700 | -4.2090888 |
| H | -1.3930884 | -5.6654563 | -2.0609461 |
| H | -1.1923600 | -7.1935498 | -3.9938361 |
| H | 1.0476126  | -7.6155390 | -5.0629393 |
| H | 3.0640875  | -6.3897153 | -4.2348879 |
| C | -2.6189627 | -0.7374275 | 2.6354481  |
| C | -2.5904243 | -1.0961853 | 1.2539241  |
| C | -2.8109846 | 0.6141897  | 2.9746459  |
| C | -2.7558082 | -0.0926719 | 0.2582368  |
| C | -2.9436216 | 1.2438309  | 0.6573242  |
| C | -2.9763643 | 1.6224506  | 2.0093134  |
| H | -2.8209251 | 0.8956904  | 4.0407502  |
| C | -2.7981103 | -0.4153257 | -1.2348062 |
| H | -3.0798576 | 2.0077301  | -0.1224185 |
| C | -1.7983420 | 0.4250600  | -2.0484167 |
| H | -2.0544463 | 1.5046633  | -2.0418875 |
| H | -1.7841367 | 0.0990370  | -3.1083927 |
| H | -0.7685160 | 0.3210442  | -1.6567046 |
| C | -4.2328063 | -0.2656243 | -1.7772735 |
| H | -2.5179669 | -1.4800807 | -1.3625081 |
| H | -4.5889428 | 0.7823873  | -1.6917015 |
| H | -4.9433834 | -0.9077908 | -1.2185065 |
| H | -4.2794782 | -0.5505345 | -2.8487526 |
| C | -3.2515789 | 3.0561800  | 2.4520991  |
| C | -2.8300929 | 4.1222079  | 1.4317832  |
| H | -2.9267326 | 5.1397958  | 1.8624503  |
| H | -3.4703281 | 4.0993217  | 0.5261536  |
| H | -1.7810429 | 3.9875379  | 1.0993615  |
| C | -4.7368355 | 3.2209590  | 2.8334491  |
| H | -2.6593155 | 3.2135818  | 3.3818477  |
| H | -4.9419907 | 4.2418470  | 3.2183374  |
| H | -5.0370032 | 2.4902618  | 3.6106069  |
| H | -5.3844362 | 3.0531292  | 1.9479374  |
| C | -2.4591873 | 1.7554998  | 3.7662599  |
| C | -1.2933159 | -1.4272978 | 4.7131494  |
| H | -1.2039100 | -2.2133121 | 5.4912830  |
| H | -1.4292041 | -0.4567690 | 5.2313309  |
| H | -0.3389227 | -1.3756839 | 4.1569194  |
| C | -3.7830416 | -1.9201076 | 4.5368973  |
| H | -2.2233887 | -2.7356674 | 3.3085406  |
| H | -3.6892961 | -2.7059368 | 5.3147228  |
| H | -4.6184340 | -2.2009652 | 3.8628584  |
| H | -4.0731489 | -0.9771601 | 5.0462149  |
| H | 6.4253173  | 1.6878557  | -1.2570718 |
| H | 6.9110161  | -3.3558522 | 1.4222660  |
| H | 3.8190697  | -1.5127093 | -5.5953388 |
| C | 5.9869586  | 1.3336186  | -0.2970181 |
| H | 4.3610930  | -3.7611882 | 3.3308078  |
| H | 5.2720980  | 3.3401074  | 0.2823957  |
| H | 1.6486464  | -0.7492297 | -4.5156639 |
| C | 5.3832498  | -0.0392456 | -0.5728137 |
| C | 6.1016554  | -4.0688902 | 1.1598453  |
| C | 4.8681582  | 2.3244074  | 0.0876225  |
| H | 4.3587897  | 1.9854365  | 1.0160049  |
| C | 5.3281514  | -1.0551234 | 0.3970732  |
| C | 4.3370711  | -1.3398701 | -4.6294831 |
| H | 7.8990564  | 0.5993093  | 0.5027261  |
| C | 4.7859095  | -0.2891698 | -1.8191975 |
| H | 7.1028353  | 1.3280909  | 0.7560173  |
| C | 7.5668683  | 2.3322177  | 0.8340851  |
| H | 4.8308381  | 0.4976198  | -2.5901359 |
| C | 4.3911618  | -2.8998668 | 2.6322860  |
| H | 6.1476448  | -4.9144922 | 1.8775050  |
| H | 6.3187112  | -4.4633493 | 0.1463463  |
| C | 4.6647014  | -2.2717340 | 0.1604645  |
| C | 2.1442764  | -0.6600773 | -3.5266044 |
| C | 4.0829737  | -1.4736880 | -2.1013060 |
| H | 5.2146042  | -2.0167866 | -4.5826926 |
| H | 4.7188544  | -0.2980005 | -4.6455968 |

|   |            |            |            |
|---|------------|------------|------------|
| C | 4.7237642  | -3.3788126 | 1.2108275  |
| C | 3.9999691  | -2.4689218 | -1.0811380 |
| C | 3.3746227  | -1.5838409 | -3.4539920 |
| H | 3.4096296  | -2.3904361 | 2.6718333  |
| H | 1.4048081  | -0.9167141 | -2.7441412 |
| H | 5.1463062  | -2.1869317 | 3.0211570  |
| H | 4.1279381  | 2.4247270  | -0.7342029 |
| H | 2.4161367  | 0.4050148  | -3.3750787 |
| H | 6.7083983  | 1.0738826  | 1.7614631  |
| H | 3.9702814  | -4.1446360 | 0.9317627  |
| H | 2.9990646  | -2.6189700 | -3.5634139 |
| H | 5.8069316  | -0.8969946 | 1.3733568  |
| C | -4.4563043 | 8.9357109  | -5.5477812 |
| C | -4.2848656 | 8.7563937  | -4.1714921 |
| C | -4.9289499 | 9.6240099  | -3.2621243 |
| C | -5.7435387 | 10.6686927 | -3.7446110 |
| C | -5.9156639 | 10.8469323 | -5.1245414 |
| C | -5.2716800 | 9.9805671  | -6.0243880 |
| H | -3.9550961 | 8.2619297  | -6.2595583 |
| H | -3.6553770 | 7.9508625  | -3.7628311 |
| C | -4.7468672 | 9.4336184  | -1.7998949 |
| H | -6.2422570 | 11.3412700 | -3.0269824 |
| H | -6.5516845 | 11.6616623 | -5.5028550 |
| H | -5.4052492 | 10.1197329 | -7.1084672 |
| O | -4.0708070 | 8.5542557  | -1.2919415 |
| H | -5.3015361 | 10.1891800 | -1.1620630 |

### agg-7-d-ma; COSMO

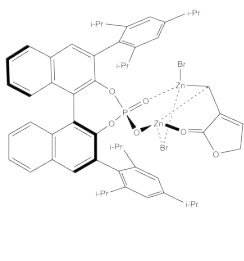

Energy (Hartree)= -11970.00839061

|    |            |            |            |
|----|------------|------------|------------|
| Zn | 0.9981830  | 5.6613228  | 89.4316834 |
| Br | 3.3144363  | 6.4692410  | 89.5586675 |
| H  | -0.8707586 | 10.2741652 | 87.4670856 |
| Br | 3.3754983  | 6.4565637  | 85.3437330 |
| H  | 0.4921927  | 5.6702632  | 86.3278227 |
| Zn | 2.5365100  | 5.5375220  | 87.3064756 |
| C  | -0.7838920 | 8.2094138  | 86.7119130 |
| C  | -1.4022279 | 9.2995426  | 87.5251284 |
| C  | -0.3908756 | 7.2010021  | 87.5399938 |
| C  | 0.2416235  | 5.8789125  | 87.3878207 |
| C  | -0.6918875 | 7.6710984  | 88.9047679 |
| O  | -1.3199779 | 8.8474417  | 88.9013785 |
| O  | -0.3753094 | 7.0902647  | 89.9667455 |
| H  | -2.4723538 | 9.4768168  | 87.2800123 |
| H  | -0.4869492 | 5.0783752  | 87.6627548 |
| H  | -0.6993490 | 8.2459956  | 85.6175260 |
| C  | 0.1030894  | 0.9319734  | 89.2187463 |
| C  | 0.8606063  | -0.1661522 | 89.6461098 |
| C  | 0.2899206  | -1.0203013 | 90.6594430 |
| C  | 1.0277605  | -2.0609928 | 91.3001571 |
| C  | -1.0748286 | -0.7957821 | 91.0745854 |
| C  | -1.6594264 | -1.6617612 | 92.0476342 |
| C  | -1.7994457 | 0.3137116  | 90.5521992 |
| H  | -2.8322443 | 0.4782101  | 90.8944727 |
| C  | -1.2198494 | 1.2230807  | 89.6742611 |
| C  | 4.4151058  | 0.5859198  | 88.3896255 |
| C  | 4.8194623  | -0.6635185 | 87.9340366 |
| H  | 5.8168812  | -0.7729398 | 87.4815992 |
| C  | 3.9468234  | -1.7896079 | 87.9517798 |

|   |            |            |            |
|---|------------|------------|------------|
| C | 4.3557652  | -3.0412274 | 87.3998469 |
| C | 2.6011783  | -1.6464544 | 88.4578858 |
| C | 1.7050331  | -2.7471976 | 88.3034723 |
| C | 2.2137040  | -0.3920327 | 89.0607489 |
| C | 3.1317763  | 0.6629854  | 89.0116857 |
| O | 0.6478813  | 1.8040089  | 88.2767527 |
| O | 2.7960320  | 1.8782936  | 89.6090138 |
| P | 1.7577479  | 2.8753063  | 88.8385270 |
| O | 1.1658855  | 3.7732195  | 89.9483978 |
| O | 2.3467926  | 3.5551085  | 87.5975645 |
| C | -0.9235463 | -2.6851560 | 92.6256174 |
| C | 0.4363807  | -2.8721055 | 92.2591105 |
| H | -2.7054629 | -1.4870261 | 92.3448658 |
| H | -1.3839681 | -3.3406923 | 93.3804434 |
| H | 2.0828283  | -2.2115749 | 91.0325411 |
| H | 1.0289763  | -3.6633924 | 92.7430914 |
| C | 2.1288845  | -3.9454837 | 87.7445178 |
| C | 3.4704107  | -4.1043843 | 87.3057841 |
| H | 0.6608193  | -2.6392389 | 88.6268512 |
| H | 1.4157100  | -4.7769030 | 87.6358123 |
| H | 3.7977450  | -5.0621333 | 86.8733197 |
| H | 5.3885775  | -3.1380648 | 87.0298395 |
| C | -2.1468503 | 3.5115666  | 90.2330945 |
| C | -1.9042672 | 2.4911059  | 89.2623361 |
| C | -2.7900121 | 4.6933070  | 89.8231095 |
| C | -2.2894511 | 2.7015497  | 87.9103542 |
| C | -2.9431114 | 3.9005423  | 87.5595915 |
| C | -3.2153873 | 4.9077163  | 88.4986684 |
| H | -2.9756707 | 5.4823333  | 90.5696482 |
| C | -2.0588144 | 1.6574911  | 86.8197450 |
| H | -3.2500429 | 4.0395791  | 86.5127289 |
| C | -1.2108636 | 2.2150921  | 85.6617793 |
| H | -1.7377766 | 3.0316633  | 85.1250669 |
| H | -0.9935481 | 1.4185372  | 84.9207083 |
| H | -0.2438170 | 2.6089607  | 86.0310147 |
| C | -3.3952322 | 1.0789807  | 86.3178925 |
| H | -1.4930748 | 0.8161325  | 87.2669971 |
| H | -4.0219971 | 1.8607198  | 85.8397701 |
| H | -3.9814855 | 0.6406331  | 87.1509458 |
| H | -3.2191353 | 0.2832353  | 85.5648490 |
| C | -3.9905875 | 6.1768486  | 88.1547111 |
| C | -4.0197231 | 6.5140104  | 86.6588946 |
| H | -4.4972675 | 7.5015394  | 86.4946313 |
| H | -4.6104739 | 5.7701980  | 86.0849594 |
| H | -3.0011811 | 6.5464124  | 86.2226790 |
| C | -5.4238394 | 6.0914654  | 88.7196848 |
| H | -3.4831224 | 7.0153137  | 88.6847391 |
| H | -5.9804206 | 7.0338074  | 88.5361370 |
| H | -5.4203096 | 5.9010890  | 89.8114010 |
| H | -5.9816103 | 5.2627896  | 88.2353757 |
| C | -1.7796897 | 3.3550097  | 91.7103572 |
| C | -1.0140134 | 4.5583496  | 92.2861624 |
| H | -0.7737294 | 4.3808826  | 93.3542458 |
| H | -1.5947103 | 5.5013108  | 92.2295925 |
| H | -0.0552896 | 4.7059734  | 91.7543592 |
| C | -3.0438955 | 3.0734756  | 92.5477766 |
| H | -1.1099820 | 2.4767115  | 91.7999617 |
| H | -2.7794509 | 2.8851746  | 93.6088242 |
| H | -3.6011305 | 2.1920548  | 92.1719167 |
| H | -3.7378053 | 3.9398040  | 92.5191388 |
| H | 7.2426608  | 5.6832505  | 86.1048870 |
| H | 7.8648985  | 2.5286360  | 91.0554224 |
| H | 5.1993064  | 0.2968750  | 83.9213702 |
| C | 7.2900068  | 5.5585518  | 87.2088514 |
| H | 5.0709233  | 2.7532584  | 92.5939445 |
| H | 7.1661672  | 7.7179697  | 87.5660338 |
| H | 3.2100590  | 1.8843382  | 83.9398054 |
| C | 6.5397846  | 4.2728152  | 87.5347364 |
| C | 7.1542449  | 1.6757661  | 91.0723439 |
| C | 6.6182705  | 6.7913457  | 87.8366697 |
| H | 6.5988589  | 6.7214719  | 88.9444516 |



|   |            |            |            |   |            |            |            |
|---|------------|------------|------------|---|------------|------------|------------|
| C | 6.4451912  | 3.7900704  | 88.8525051 | H | -0.5985276 | 8.2897228  | 85.6483027 |
| C | 5.6676697  | 0.8747919  | 84.7452225 | C | 0.1060916  | 0.9265844  | 89.2373990 |
| H | 9.2641115  | 4.5870524  | 87.1313372 | C | 0.8618419  | -0.1722056 | 89.6661765 |
| C | 5.9244731  | 3.5246393  | 86.5184365 | C | 0.2876197  | -1.0276264 | 90.6758287 |
| C | 8.7742618  | 5.4617130  | 87.6055083 | C | 1.0236054  | -2.0696391 | 91.3158603 |
| H | 9.3246253  | 6.3748520  | 87.2972817 | C | -1.0779722 | -0.8037310 | 91.0877100 |
| H | 5.9687467  | 3.9078516  | 85.4868553 | C | -1.6635936 | -1.6705898 | 92.0586828 |
| C | 5.1439761  | 3.1598263  | 91.5639126 | C | -1.8015067 | 0.3046137  | 90.5619888 |
| H | 7.1266302  | 1.2797380  | 92.1089139 | H | -2.8359943 | 0.4688109  | 90.8993063 |
| H | 7.5647174  | 0.8847900  | 90.4120309 | C | -1.2199940 | 1.2142776  | 89.6859299 |
| C | 5.7787344  | 2.5920004  | 89.1643005 | C | 4.4108122  | 0.5885157  | 88.4041183 |
| C | 3.7087882  | 2.4865141  | 84.7274870 | C | 4.8145289  | -0.6580544 | 87.9407292 |
| C | 5.2420466  | 2.3201265  | 86.7726127 | H | 5.8083713  | -0.7608229 | 87.4789224 |
| H | 6.2799987  | 0.1752905  | 85.3496026 | C | 3.9450912  | -1.7863452 | 87.9586047 |
| H | 6.3600746  | 1.6140322  | 84.2903519 | C | 4.3515595  | -3.0337110 | 87.3965710 |
| C | 5.7498237  | 2.1121113  | 90.6136637 | C | 2.6019488  | -1.6479540 | 88.4721919 |
| C | 5.1848762  | 1.8403945  | 88.1139888 | C | 1.7064520  | -2.7485191 | 88.3152968 |
| C | 4.5962877  | 1.5805344  | 85.5988931 | C | 2.2158242  | -0.3972059 | 89.0830098 |
| H | 4.1289982  | 3.4575732  | 91.2362690 | C | 3.1323846  | 0.6590533  | 89.0372939 |
| H | 2.9295359  | 2.9806484  | 85.3374017 | O | 0.6546585  | 1.8023795  | 88.3018595 |
| H | 5.7664087  | 4.0774398  | 91.6128137 | O | 2.7966678  | 1.8692533  | 89.6437957 |
| H | 5.5731814  | 6.8932752  | 87.4838458 | P | 1.7618600  | 2.8712877  | 88.8766665 |
| H | 4.2896180  | 3.2825881  | 84.2185254 | O | 1.1644040  | 3.7702198  | 89.9803358 |
| H | 8.8918226  | 5.3576432  | 88.7047070 | O | 2.3581670  | 3.5519908  | 87.6382229 |
| H | 5.1019984  | 1.2124692  | 90.6578832 | C | -0.9296062 | -2.6948970 | 92.6362778 |
| H | 3.9346709  | 0.7958267  | 86.0174692 | C | 0.4301780  | -2.8822501 | 92.2715664 |
| H | 6.9094607  | 4.3650428  | 89.6695590 | H | -2.7100249 | -1.4957966 | 92.3545140 |
| C | 10.3276257 | 32.6993901 | 82.7746847 | H | -1.3916911 | -3.3511272 | 93.3894193 |
| C | 10.0704569 | 31.6003769 | 83.6010708 | H | 2.0787532  | -2.2191798 | 91.0483207 |
| C | 10.7930457 | 31.4388425 | 84.8044529 | H | 1.0215378  | -3.6749714 | 92.7545983 |
| C | 11.7731047 | 32.3857185 | 85.1690356 | C | 2.1284342  | -3.9421890 | 87.7462040 |
| C | 12.0300571 | 33.4869085 | 84.3395350 | C | 3.4670855  | -4.0966548 | 87.2992529 |
| C | 11.3069950 | 33.6427746 | 83.1439283 | H | 0.6641598  | -2.6430895 | 88.6453553 |
| H | 9.7663299  | 32.8289928 | 81.8365926 | H | 1.4153096  | -4.7733326 | 87.6354993 |
| H | 9.3121491  | 30.8454029 | 83.3418024 | H | 3.7928769  | -5.0506503 | 86.8575533 |
| C | 10.5221585 | 30.2763238 | 85.6867375 | H | 5.3823923  | -3.1268381 | 87.0201796 |
| H | 12.3323650 | 32.2514488 | 86.1097224 | C | -2.1552984 | 3.5032945  | 90.2289960 |
| H | 12.7942120 | 34.2267528 | 84.6226194 | C | -1.9049340 | 2.4789216  | 89.2650596 |
| H | 11.5072304 | 34.5074619 | 82.4922350 | C | -2.7938952 | 4.6834910  | 89.8079511 |
| O | 9.6936510  | 29.4065971 | 85.4600138 | C | -2.2795149 | 2.6825320  | 87.9091086 |
| H | 11.1581165 | 30.2461024 | 86.6222856 | C | -2.9292152 | 3.8799263  | 87.5474749 |
|   |            |            |            | C | -3.2068689 | 4.8921719  | 88.4791822 |
|   |            |            |            | H | -2.9829110 | 5.4770025  | 90.5489137 |
|   |            |            |            | C | -2.0396173 | 1.6329616  | 86.8257882 |
|   |            |            |            | H | -3.2280708 | 4.0135270  | 86.4975547 |
|   |            |            |            | C | -1.1869408 | 2.1857230  | 85.6691553 |
|   |            |            |            | H | -1.7139178 | 2.9948289  | 85.1212401 |
|   |            |            |            | H | -0.9595872 | 1.3849715  | 84.9358162 |
|   |            |            |            | H | -0.2245815 | 2.5879553  | 86.0412454 |
|   |            |            |            | C | -3.3712082 | 1.0457501  | 86.3216193 |
|   |            |            |            | H | -1.4731595 | 0.7967422  | 87.2815185 |
|   |            |            |            | H | -3.9991611 | 1.8210663  | 85.8348108 |
|   |            |            |            | H | -3.9603000 | 0.6115940  | 87.1546709 |
|   |            |            |            | H | -3.1889948 | 0.2452761  | 85.5751171 |
|   |            |            |            | C | -3.9769736 | 6.1607064  | 88.1217073 |
|   |            |            |            | C | -3.9680661 | 6.5048652  | 86.6270031 |
|   |            |            |            | H | -4.4457488 | 7.4909759  | 86.4535864 |
|   |            |            |            | H | -4.5411782 | 5.7625036  | 86.0337293 |
|   |            |            |            | H | -2.9383098 | 6.5424285  | 86.2184636 |
|   |            |            |            | C | -5.4235980 | 6.0685484  | 88.6496513 |
|   |            |            |            | H | -3.4846492 | 6.9985915  | 88.6669251 |
|   |            |            |            | H | -5.9805032 | 7.0088442  | 88.4562652 |
|   |            |            |            | H | -5.4463638 | 5.8730206  | 89.7400881 |
|   |            |            |            | H | -5.9656955 | 5.2390239  | 88.1496538 |
|   |            |            |            | C | -1.7999427 | 3.3520357  | 91.7096347 |
|   |            |            |            | C | -1.0373792 | 4.5559630  | 92.2879086 |
|   |            |            |            | H | -0.8120139 | 4.3840840  | 93.3601228 |
|   |            |            |            | H | -1.6120741 | 5.5016518  | 92.2183608 |
|   |            |            |            | H | -0.0716587 | 4.6951543  | 91.7675350 |
|   |            |            |            | C | -3.0710131 | 3.0723282  | 92.5368207 |
|   |            |            |            | H | -1.1312185 | 2.4738677  | 91.8068826 |

### agg-7-d-ma

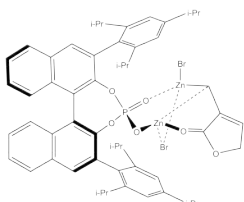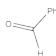

Energy (Hartree)= -11969.99364428

|    |            |            |            |
|----|------------|------------|------------|
| Zn | 1.0020875  | 5.6527251  | 89.4202034 |
| Br | 3.3207906  | 6.4520279  | 89.6240674 |
| H  | -0.8310587 | 10.2926735 | 87.5263946 |
| Br | 3.4140169  | 6.4600709  | 85.3875316 |
| H  | 0.6111699  | 5.7150484  | 86.3743105 |
| Zn | 2.6703138  | 5.5110901  | 87.3621175 |
| C  | -0.7226595 | 8.2377497  | 86.7382302 |
| C  | -1.3648341 | 9.3171323  | 87.5510628 |
| C  | -0.3633089 | 7.2124853  | 87.5607875 |
| C  | 0.2693732  | 5.8930063  | 87.4133123 |
| C  | -0.6986330 | 7.6660468  | 88.9271457 |
| O  | -1.3285399 | 8.8456213  | 88.9198959 |
| O  | -0.4013463 | 7.0767986  | 89.9852732 |
| H  | -2.4265607 | 9.5006345  | 87.2731981 |
| H  | -0.4771158 | 5.0889316  | 87.6202160 |

|   |            |            |            |    |            |            |            |
|---|------------|------------|------------|----|------------|------------|------------|
| H | -2.8161286 | 2.8867808  | 93.6006493 | O  | -1.0330006 | 8.9805318  | 88.9460884 |
| H | -3.6251402 | 2.1899844  | 92.1586496 | C  | -1.0088235 | 9.4859640  | 87.5859129 |
| H | -3.7659693 | 3.9374025  | 92.5002966 | O  | -0.2258322 | 7.1491395  | 89.9996357 |
| H | 7.1067856  | 5.7429984  | 86.0934803 | C  | 0.5148693  | 6.0117594  | 87.4173069 |
| H | 7.8787850  | 2.5617937  | 91.0292301 | H  | -0.4393976 | 10.4405628 | 87.5994362 |
| H | 5.1515854  | 0.3093273  | 83.9250382 | H  | -2.0534132 | 9.7131519  | 87.2796793 |
| C | 7.2276615  | 5.5847013  | 87.1874115 | Zn | 2.7872972  | 5.5655345  | 87.4845822 |
| H | 5.1051769  | 2.7515174  | 92.6027920 | Br | 3.8329697  | 6.5296780  | 85.6476964 |
| H | 7.1794787  | 7.7331899  | 87.6131620 | C  | -0.0055315 | 1.0162752  | 88.9997167 |
| H | 3.1455983  | 1.8722194  | 83.9646327 | C  | 0.6678276  | -0.1366511 | 89.4221370 |
| C | 6.4837231  | 4.2984080  | 87.5256971 | C  | -0.0074140 | -1.0036865 | 90.3564859 |
| C | 7.1779929  | 1.7010826  | 91.0517698 | C  | 0.6370044  | -2.1074818 | 90.9920623 |
| C | 6.6275288  | 6.8118175  | 87.8925120 | C  | -1.3830017 | -0.7266246 | 90.6968376 |
| H | 6.6759639  | 6.7131168  | 88.9972094 | C  | -2.0690077 | -1.6014513 | 91.5927256 |
| C | 6.4147953  | 3.8115706  | 88.8435175 | C  | -2.0187333 | 0.4385693  | 90.1794450 |
| C | 5.6214260  | 0.8920696  | 84.7445471 | H  | -3.0631388 | 0.6389525  | 90.4620493 |
| H | 9.1706046  | 4.5785951  | 86.9431853 | C  | -1.3410301 | 1.3534144  | 89.3808744 |
| C | 5.8641619  | 3.5435399  | 86.5168237 | C  | 4.3341883  | 0.4809053  | 88.4458489 |
| C | 8.7333017  | 5.4455518  | 87.4785594 | C  | 4.7002966  | -0.7630924 | 87.9443284 |
| H | 9.2824223  | 6.3580241  | 87.1661178 | H  | 5.7199307  | -0.9053862 | 87.5548936 |
| H | 5.8889367  | 3.9293911  | 85.4857557 | C  | 3.7689012  | -1.8357930 | 87.8361386 |
| C | 5.1567964  | 3.1599600  | 91.5722806 | C  | 4.1436332  | -3.0734052 | 87.2308960 |
| H | 7.1677575  | 1.3018885  | 92.0874128 | C  | 2.4029775  | -1.6456248 | 88.2663136 |
| H | 7.5904548  | 0.9174485  | 90.3843312 | C  | 1.4603968  | -2.6820890 | 87.9912670 |
| C | 5.7677492  | 2.6050074  | 89.1628239 | C  | 2.0434975  | -0.4056653 | 88.9132501 |
| C | 3.6436886  | 2.4795538  | 84.7486274 | C  | 3.0152750  | 0.5986969  | 88.9810922 |
| C | 5.2021478  | 2.3293874  | 86.7778878 | O  | 0.6446183  | 1.9000108  | 88.1390725 |
| H | 6.2494423  | 0.1998889  | 85.3410763 | O  | 2.6980419  | 1.8000737  | 89.6154708 |
| H | 6.3002023  | 1.6396694  | 84.2832405 | P  | 1.7663381  | 2.8834922  | 88.8249857 |
| C | 5.7631410  | 2.1222608  | 90.6116672 | O  | 1.1423276  | 3.7613207  | 89.9332155 |
| C | 5.1690276  | 1.8478305  | 88.1195700 | O  | 2.4757997  | 3.5835655  | 87.6607179 |
| C | 4.5509676  | 1.5839649  | 85.6105663 | C  | -1.4212903 | -2.6838419 | 92.1689508 |
| H | 4.1324404  | 3.4431628  | 91.2622373 | C  | -0.0518434 | -2.9254670 | 91.8772828 |
| H | 2.8625477  | 2.9624898  | 85.3649606 | H  | -3.1223004 | -1.3866449 | 91.8323240 |
| H | 5.7659433  | 4.0867399  | 91.6135735 | H  | -1.9594680 | -3.3451119 | 92.8651216 |
| H | 5.5662638  | 6.9503442  | 87.6077571 | H  | 1.6978735  | -2.3009872 | 90.7808046 |
| H | 4.2072377  | 3.2848868  | 84.2351897 | H  | 0.4701278  | -3.7651822 | 92.3608905 |
| H | 8.9206441  | 5.2980746  | 88.5629919 | C  | 1.8531431  | -3.8661729 | 87.3817592 |
| H | 5.1264343  | 1.2148846  | 90.6614539 | C  | 3.2091812  | -4.0748628 | 87.0139798 |
| H | 3.9033606  | 0.7907115  | 86.0349738 | H  | 0.4051826  | -2.5328564 | 88.2578429 |
| H | 6.8852066  | 4.3900850  | 89.6544545 | H  | 1.1040708  | -4.6458525 | 87.1751415 |
| C | 10.3369953 | 32.7119044 | 82.7760597 | H  | 3.5103696  | -5.0206124 | 86.5382640 |
| C | 10.0779166 | 31.6156763 | 83.6049890 | H  | 5.1908553  | -3.2072088 | 86.9172398 |
| C | 10.8003722 | 31.4549312 | 84.8076010 | C  | -2.1976422 | 3.6649176  | 89.9637029 |
| C | 11.7810802 | 32.4007638 | 85.1694147 | C  | -1.9366192 | 2.6673233  | 88.9744020 |
| C | 12.0401653 | 33.4995761 | 84.3378510 | C  | -2.7496802 | 4.8924690  | 89.5551370 |
| C | 11.3180364 | 33.6538452 | 83.1421614 | C  | -2.2154633 | 2.9431489  | 87.6081690 |
| H | 9.7759511  | 32.8402624 | 81.8376200 | C  | -2.7838081 | 4.1849739  | 87.2587722 |
| H | 9.3189375  | 30.8592654 | 83.3519520 | C  | -3.0691440 | 5.1736295  | 88.2134684 |
| C | 10.5249841 | 30.2892687 | 85.6883397 | H  | -2.9468348 | 5.6654011  | 90.3155301 |
| H | 12.3401675 | 32.2669892 | 86.1104549 | C  | -1.9571216 | 1.9282599  | 86.4965506 |
| H | 12.8057338 | 34.2387011 | 84.6190777 | C  | -3.0096500 | 4.3743196  | 86.1992922 |
| H | 11.5206103 | 34.5159861 | 82.4878409 | H  | -1.0044491 | 2.4848050  | 85.4225524 |
| O | 9.6973635  | 29.4237240 | 85.4578472 | H  | -1.4534081 | 3.3449036  | 84.8828735 |
| H | 11.1612109 | 30.2572945 | 86.6261327 | H  | -0.7723032 | 1.7052954  | 84.6680598 |

### agg-7-d-mi; COSMO

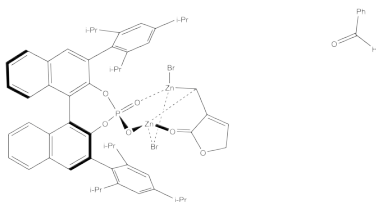

Energy (Hartree)=-11970.00885505

|    |            |           |            |
|----|------------|-----------|------------|
| Zn | 1.1141666  | 5.6782732 | 89.5002523 |
| Br | 3.4535717  | 6.3447228 | 89.8310856 |
| C  | -0.3790387 | 8.4033912 | 86.7718712 |
| C  | -0.0767696 | 7.3513496 | 87.5833337 |
| C  | -0.4495081 | 7.7814832 | 88.9432007 |

|    |            |            |            |
|----|------------|------------|------------|
| O  | -1.0330006 | 8.9805318  | 88.9460884 |
| C  | -1.0088235 | 9.4859640  | 87.5859129 |
| O  | -0.2258322 | 7.1491395  | 89.9996357 |
| C  | 0.5148693  | 6.0117594  | 87.4173069 |
| H  | -0.4393976 | 10.4405628 | 87.5994362 |
| H  | -2.0534132 | 9.7131519  | 87.2796793 |
| Zn | 2.7872972  | 5.5655345  | 87.4845822 |
| Br | 3.8329697  | 6.5296780  | 85.6476964 |
| C  | -0.0055315 | 1.0162752  | 88.9997167 |
| C  | 0.6678276  | -0.1366511 | 89.4221370 |
| C  | -0.0074140 | -1.0036865 | 90.3564859 |
| C  | 0.6370044  | -2.1074818 | 90.9920623 |
| C  | -1.3830017 | -0.7266246 | 90.6968376 |
| C  | -2.0690077 | -1.6014513 | 91.5927256 |
| C  | -2.0187333 | 0.4385693  | 90.1794450 |
| H  | -3.0631388 | 0.6389525  | 90.4620493 |
| C  | -1.3410301 | 1.3534144  | 89.3808744 |
| C  | 4.3341883  | 0.4809053  | 88.4458489 |
| C  | 4.7002966  | -0.7630924 | 87.9443284 |
| H  | 5.7199307  | -0.9053862 | 87.5548936 |
| C  | 3.7689012  | -1.8357930 | 87.8361386 |
| C  | 4.1436332  | -3.0734052 | 87.2308960 |
| C  | 2.4029775  | -1.6456248 | 88.2663136 |
| C  | 1.4603968  | -2.6820890 | 87.9912670 |
| C  | 2.0434975  | -0.4056653 | 88.9132501 |
| C  | 3.0152750  | 0.5986969  | 88.9810922 |
| O  | 0.6446183  | 1.9000108  | 88.1390725 |
| O  | 2.6980419  | 1.8000737  | 89.6154708 |
| P  | 1.7663381  | 2.8834922  | 88.8249857 |
| O  | 1.1423276  | 3.7613207  | 89.9332155 |
| O  | 2.4757997  | 3.5835655  | 87.6607179 |
| C  | -1.4212903 | -2.6838419 | 92.1689508 |
| C  | -0.0518434 | -2.9254670 | 91.8772828 |
| H  | -3.1223004 | -1.3866449 | 91.8323240 |
| H  | -1.9594680 | -3.3451119 | 92.8651216 |
| H  | 1.6978735  | -2.3009872 | 90.7808046 |
| H  | 0.4701278  | -3.7651822 | 92.3608905 |
| C  | 1.8531431  | -3.8661729 | 87.3817592 |
| C  | 3.2091812  | -4.0748628 | 87.0139798 |
| H  | 0.4051826  | -2.5328564 | 88.2578429 |
| H  | 1.1040708  | -4.6458525 | 87.1751415 |
| H  | 3.5103696  | -5.0206124 | 86.5382640 |
| H  | 5.1908553  | -3.2072088 | 86.9172398 |
| C  | -2.1976422 | 3.6649176  | 89.9637029 |
| C  | -1.9366192 | 2.6673233  | 88.9744020 |
| C  | -2.7496802 | 4.8924690  | 89.5551370 |
| C  | -2.2154633 | 2.9431489  | 87.6081690 |
| C  | -2.7838081 | 4.1849739  | 87.2587722 |
| C  | -3.0691440 | 5.1736295  | 88.2134684 |
| H  | -2.9468348 | 5.6654011  | 90.3155301 |
| C  | -1.9571216 | 1.9282599  | 86.4965506 |
| C  | -3.0096500 | 4.3743196  | 86.1992922 |
| H  | -1.0044491 | 2.4848050  | 85.4225524 |
| H  | -1.4534081 | 3.3449036  | 84.8828735 |
| H  | -0.7723032 | 1.7052954  | 84.6680598 |
| H  | -0.0493107 | 2.8179778  | 85.8733547 |
| C  | -3.2792931 | 1.4327119  | 85.8811989 |
| H  | -1.4635758 | 1.0450535  | 86.9485593 |
| H  | -3.8331132 | 2.2591380  | 85.3884038 |
| H  | -3.9441558 | 0.9963917  | 86.6541690 |
| H  | -3.0859037 | 0.6542230  | 85.1144455 |
| C  | -3.7471803 | 6.4953492  | 87.8625704 |
| C  | -3.6528045 | 6.8791841  | 86.3808497 |
| H  | -4.0548347 | 7.9002455  | 86.2196196 |
| H  | -4.2482378 | 6.1934240  | 85.7429286 |
| H  | -2.6066536 | 6.8585396  | 86.0152629 |
| C  | -5.2186159 | 6.4790758  | 88.3260844 |
| H  | -3.2306847 | 7.2856297  | 88.4542439 |
| H  | -5.7049624 | 7.4584972  | 88.1370397 |
| H  | -5.3022033 | 6.2573322  | 89.4086526 |
| H  | -5.7886822 | 5.7001603  | 87.7777287 |

|   |            |            |            |
|---|------------|------------|------------|
| C | -1.9450683 | 3.4366599  | 91.4551873 |
| C | -1.1737534 | 4.5820412  | 92.1318714 |
| H | -1.0068648 | 4.3486271  | 93.2030450 |
| H | -1.7146636 | 5.5487417  | 92.0833666 |
| H | -0.1790684 | 4.7153136  | 91.6667035 |
| C | -3.2769974 | 3.1806029  | 92.1891910 |
| H | -1.3209589 | 2.5264108  | 91.5551287 |
| H | -3.0984661 | 2.9475920  | 93.2592521 |
| H | -3.8383253 | 2.3350995  | 91.7435552 |
| H | -3.9334946 | 4.0748113  | 92.1408232 |
| H | 7.7113121  | 5.4660937  | 86.7204183 |
| H | 7.6460251  | 2.0433676  | 91.5089850 |
| H | 5.5075154  | 0.4100094  | 84.0345711 |
| C | 7.5981892  | 5.3128289  | 87.8160651 |
| H | 4.7518778  | 2.3772406  | 92.8129005 |
| H | 7.5114826  | 7.4682027  | 88.2140345 |
| H | 3.6074235  | 2.0938587  | 83.9940948 |
| C | 6.7495236  | 4.0599459  | 87.9955638 |
| C | 6.8858816  | 1.2402894  | 91.4084380 |
| C | 6.8967199  | 6.5594098  | 88.3827626 |
| H | 6.7259883  | 6.4624957  | 89.4755049 |
| C | 6.5066194  | 3.5137229  | 89.2684696 |
| C | 5.9317014  | 0.9076617  | 84.9315784 |
| H | 9.5199364  | 4.2517095  | 87.9893843 |
| C | 6.1804502  | 3.4126685  | 86.8872678 |
| C | 9.0067459  | 5.1396288  | 88.4115968 |
| H | 9.6333145  | 6.0319143  | 88.2048260 |
| H | 6.3416120  | 3.8471140  | 85.8879305 |
| C | 4.9396465  | 2.8309265  | 91.8176326 |
| H | 6.7411086  | 0.7851785  | 92.4104791 |
| H | 7.3050327  | 0.4647030  | 90.7353667 |
| C | 5.7406111  | 2.3490638  | 89.4499937 |
| C | 4.0593343  | 2.6174123  | 84.8621224 |
| C | 5.4041462  | 2.2446195  | 87.0090925 |
| H | 6.4556212  | 0.1390038  | 85.5352604 |
| H | 6.6953433  | 1.6356195  | 84.5854601 |
| C | 5.5568825  | 1.7953354  | 90.8612282 |
| C | 5.1962382  | 1.6975837  | 88.3093812 |
| C | 4.8262684  | 1.6136803  | 85.7404583 |
| H | 3.9782166  | 3.2151888  | 91.4249987 |
| H | 3.2506784  | 3.1072339  | 85.4361553 |
| H | 5.6135510  | 3.6994163  | 91.9704647 |
| H | 5.9123756  | 6.7138510  | 87.8982174 |
| H | 4.7168556  | 3.4162958  | 84.4625020 |
| H | 8.9666747  | 5.0117657  | 89.5137849 |
| H | 4.8523439  | 0.9407427  | 90.7995179 |
| H | 4.0958665  | 0.8398269  | 86.0504105 |
| H | 6.9326415  | 4.0101266  | 90.1547749 |
| H | -0.2617442 | 5.2306478  | 87.6019168 |
| H | 0.8315147  | 5.8400356  | 86.3682186 |
| H | -0.2246890 | 8.4760729  | 85.6869095 |
| C | -0.8680771 | 14.6941939 | 77.0211696 |
| C | -1.3756594 | 14.1433688 | 78.2028352 |
| C | -2.7622277 | 13.9010458 | 78.3284725 |
| C | -3.6311695 | 14.2154727 | 77.2622113 |
| C | -3.1209256 | 14.7674929 | 76.0781852 |
| C | -1.7403156 | 15.0059706 | 75.9590388 |
| H | 0.2114811  | 14.8843499 | 76.9186116 |
| H | -0.7214739 | 13.8877546 | 79.0509226 |
| C | -3.3078644 | 13.3157069 | 79.5782656 |
| H | -4.7116281 | 14.0226592 | 77.3694779 |
| H | -3.7974664 | 15.0127528 | 75.2451355 |
| H | -1.3377104 | 15.4383613 | 75.0296580 |
| O | -2.6402877 | 13.0074223 | 80.5554691 |
| H | -4.4297455 | 13.1664582 | 79.5682224 |

Energy (Hartree)= -11969.99390449

|    |            |            |            |
|----|------------|------------|------------|
| Zn | 1.0488342  | 5.6191897  | 89.5542179 |
| Br | 3.3782814  | 6.2985158  | 89.9635386 |
| C  | -0.3679936 | 8.4256205  | 86.9153597 |
| C  | -0.1128534 | 7.3407451  | 87.6994513 |
| C  | -0.5243746 | 7.7331996  | 89.0636109 |
| O  | -1.0996545 | 8.9400865  | 89.0825812 |
| C  | -1.0176058 | 9.4880058  | 87.7442971 |
| O  | -0.3298245 | 7.0720109  | 90.1033142 |
| C  | 0.4711455  | 6.0029963  | 87.5185856 |
| H  | -0.4402341 | 10.4362033 | 87.8131854 |
| H  | -2.0476119 | 9.7384267  | 87.4059262 |
| Zn | 2.8488297  | 5.5187342  | 87.6089643 |
| Br | 3.7717105  | 6.5453526  | 85.7525592 |
| C  | -0.0063466 | 0.9453824  | 89.0502684 |
| C  | 0.6792253  | -0.2018043 | 89.4699767 |
| C  | 0.0070249  | -1.0843018 | 90.3920439 |
| C  | 0.6599961  | -2.1852331 | 91.0234177 |
| C  | -1.3750859 | -0.8288357 | 90.7225683 |
| C  | -2.0567052 | -1.7214885 | 91.6033435 |
| C  | -2.0210432 | 0.3325290  | 90.2100453 |
| H  | -3.0697570 | 0.5195795  | 90.4861229 |
| C  | -1.3489103 | 1.2620925  | 89.4244782 |
| C  | 4.3305257  | 0.4859826  | 88.4886003 |
| C  | 4.7218017  | -0.7502215 | 87.9883163 |
| H  | 5.7408547  | -0.8674992 | 87.5891534 |
| C  | 3.8148783  | -1.8442534 | 87.8891596 |
| C  | 4.2157496  | -3.0766070 | 87.2911874 |
| C  | 2.4452646  | -1.6808892 | 88.3186579 |
| C  | 1.5251997  | -2.7374307 | 88.0446700 |
| C  | 2.0615208  | -0.4486310 | 88.9673803 |
| C  | 3.0150233  | 0.5731367  | 89.0384354 |
| O  | 0.6357096  | 1.8446159  | 88.2005300 |
| O  | 2.6809358  | 1.7629147  | 89.6847060 |
| P  | 1.7358277  | 2.8411265  | 88.9045129 |
| O  | 1.0926871  | 3.7029920  | 90.0119584 |
| O  | 2.4389138  | 3.5618435  | 87.7476251 |
| C  | -1.4010081 | -2.8019961 | 92.1727702 |
| C  | -0.0264201 | -3.0224737 | 91.8915728 |
| H  | -3.1143915 | -1.5219531 | 91.8369973 |
| H  | -1.9372596 | -3.4781025 | 92.8558797 |
| H  | 1.7253420  | -2.3610643 | 90.8200657 |
| H  | 0.5018021  | -3.8611713 | 92.3701097 |
| C  | 1.9438541  | -3.9163541 | 87.4432398 |
| C  | 3.3040055  | -4.0991050 | 87.0795610 |
| H  | 0.4668978  | -2.6089148 | 88.3091003 |
| H  | 1.2117160  | -4.7130942 | 87.2413005 |
| H  | 3.6264328  | -5.0415835 | 86.6114110 |
| H  | 5.2661979  | -3.1897770 | 86.9801634 |
| C  | -2.2325152 | 3.5580722  | 90.0238564 |
| C  | -1.9554521 | 2.5733933  | 89.0264960 |
| C  | -2.7885838 | 4.7859076  | 89.6225081 |
| C  | -2.2243070 | 2.8608602  | 87.6607130 |
| C  | -2.7950913 | 4.1033004  | 87.3186081 |
| C  | -3.0947203 | 5.0799581  | 88.2810365 |
| H  | -2.9970606 | 5.5492209  | 90.3895249 |
| C  | -1.9540816 | 1.8556649  | 86.5429601 |
| H  | -3.0117812 | 4.3029109  | 86.2590417 |
| C  | -1.0037480 | 2.4252683  | 85.4740432 |
| H  | -1.4600930 | 3.2804306  | 84.9327269 |
| H  | -0.7587482 | 1.6506188  | 84.7187769 |
| H  | -0.0540377 | 2.7687094  | 85.9283260 |
| C  | -3.2716130 | 1.3528587  | 85.9236124 |
| H  | -1.4543292 | 0.9741142  | 86.9913194 |
| H  | -3.8334418 | 2.1780510  | 85.4379721 |
| H  | -3.9326019 | 0.9047214  | 86.6929292 |
| H  | -3.0724143 | 0.5826513  | 85.1500679 |
| C  | -3.7788709 | 6.4006423  | 87.9380628 |
| C  | -3.6468111 | 6.8170820  | 86.4677965 |
| H  | -4.0627180 | 7.8339766  | 86.3141673 |

### agg-7-d-mi

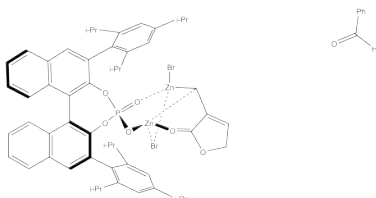

|   |            |            |            |
|---|------------|------------|------------|
| H | -4.2113169 | 6.1354679  | 85.7982356 |
| H | -2.5900285 | 6.8218291  | 86.1336041 |
| C | -5.2622688 | 6.3540757  | 88.3590939 |
| H | -3.2892380 | 7.1854833  | 88.5592768 |
| H | -5.7602146 | 7.3292710  | 88.1780920 |
| H | -5.3720697 | 6.1057854  | 89.4334155 |
| H | -5.8045658 | 5.5783540  | 87.7793563 |
| C | -1.9935712 | 3.3164558  | 91.5157774 |
| C | -1.2269575 | 4.4540582  | 92.2113269 |
| H | -1.0885237 | 4.2177491  | 93.2860310 |
| H | -1.7558544 | 5.4268217  | 92.1523588 |
| H | -0.2205863 | 4.5764687  | 91.7695064 |
| C | -3.3330613 | 3.0526328  | 92.2329999 |
| H | -1.3705809 | 2.4053447  | 91.6135516 |
| H | -3.1661925 | 2.8037948  | 93.3013644 |
| H | -3.8925795 | 2.2153010  | 91.7698133 |
| H | -3.9880670 | 3.9481928  | 92.1916633 |
| H | 7.3541520  | 5.6467426  | 86.6440765 |
| H | 7.6849361  | 2.1785387  | 91.4332539 |
| H | 5.3620823  | 0.4090661  | 84.0613438 |
| C | 7.3982041  | 5.4251232  | 87.7327405 |
| H | 4.8214395  | 2.3943222  | 92.8357632 |
| H | 7.4024099  | 7.5479080  | 88.2732373 |
| H | 3.4168231  | 2.0468226  | 84.0497264 |
| C | 6.5872952  | 4.1534426  | 87.9511502 |
| C | 6.9533328  | 1.3464644  | 91.3633847 |
| C | 6.8000527  | 6.6361616  | 88.4666791 |
| H | 6.7744835  | 6.4772287  | 89.5650873 |
| C | 6.4138634  | 3.6008484  | 89.2328735 |
| C | 5.7951151  | 0.9305436  | 84.9402709 |
| H | 9.3142643  | 4.3549534  | 87.5556180 |
| C | 6.0099452  | 3.4772861  | 86.8643841 |
| C | 8.8756245  | 5.2095806  | 88.1094311 |
| H | 9.4773083  | 6.1141735  | 87.8827253 |
| H | 6.1170899  | 3.9157070  | 85.8600019 |
| C | 4.9565034  | 2.8550843  | 91.8353202 |
| H | 6.8613660  | 0.8930050  | 92.3723546 |
| H | 7.3796020  | 0.5840794  | 90.6801887 |
| C | 5.7043539  | 2.4054277  | 89.4426454 |
| C | 3.8808075  | 2.5931439  | 84.8969154 |
| C | 5.2895934  | 2.2777319  | 87.0147934 |
| H | 6.3555373  | 0.1848290  | 85.5396245 |
| H | 6.5302598  | 1.6733315  | 84.5657644 |
| C | 5.5866308  | 1.8468571  | 90.8589170 |
| C | 5.1498888  | 1.7281834  | 88.3229360 |
| C | 4.6932596  | 1.6194260  | 85.7686053 |
| H | 3.9662277  | 3.1957098  | 91.4761742 |
| H | 3.0766906  | 3.0745147  | 85.4842119 |
| H | 5.5951148  | 3.7529664  | 91.9675746 |
| H | 5.7650961  | 6.8327307  | 88.1251003 |
| H | 4.5073337  | 3.4006124  | 84.4663947 |
| H | 8.9865025  | 4.9978269  | 89.1937658 |
| H | 4.9152858  | 0.9644044  | 90.8172193 |
| H | 3.9896271  | 0.8321246  | 86.1058496 |
| H | 6.8499528  | 4.1169951  | 90.1030545 |
| H | -0.3209816 | 5.2240934  | 87.6293260 |
| H | 0.8753716  | 5.8659577  | 86.4958991 |
| H | -0.1646752 | 8.5322745  | 85.8413855 |
| C | -1.0906988 | 15.1991419 | 76.0802918 |
| C | -0.9416128 | 14.6236858 | 77.3462828 |
| C | -2.0770640 | 14.1662243 | 78.0503902 |
| C | -3.3580084 | 14.2923546 | 77.4752018 |
| C | -3.5065916 | 14.8701706 | 76.2064802 |
| C | -2.3727622 | 15.3226076 | 75.5103450 |
| H | -0.2081018 | 15.5560290 | 75.5275547 |
| H | 0.0444228  | 14.5115926 | 77.8231038 |
| C | -1.9215373 | 13.5521066 | 79.3947799 |
| H | -4.2388603 | 13.9328397 | 78.0327867 |
| H | -4.5061262 | 14.9694676 | 75.7565356 |
| H | -2.4877447 | 15.7760715 | 74.5135790 |
| O | -0.8594123 | 13.4019169 | 79.9750310 |

H -2.8981246 13.2184154 79.8644734

### agg-7-j-ma; COSMO

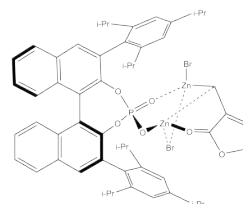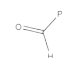

Energy (Hartree) = -11970.00840331

|    |            |            |            |
|----|------------|------------|------------|
| Zn | 0.8839143  | 5.6338212  | 89.1691146 |
| Br | 3.2051406  | 6.4299361  | 89.2960556 |
| H  | -1.0013672 | 10.2401635 | 87.2017295 |
| Br | 3.2694765  | 6.4008859  | 85.0827881 |
| H  | 0.3833619  | 5.6448892  | 86.0697579 |
| Zn | 2.4250616  | 5.4926008  | 87.0475368 |
| C  | -0.9108297 | 8.1736936  | 86.4520818 |
| C  | -1.5295144 | 9.2640809  | 87.2646960 |
| C  | -0.5108120 | 7.1690617  | 87.2812515 |
| C  | 0.1255864  | 5.8483671  | 87.1291128 |
| C  | -0.8086807 | 7.6418215  | 88.6458839 |
| O  | -1.4405363 | 8.8161917  | 88.6417597 |
| O  | -0.4868716 | 7.0647718  | 89.7081984 |
| H  | -2.6012226 | 9.4374149  | 87.0234926 |
| H  | -0.6027479 | 5.0453139  | 87.3967229 |
| H  | -0.8308798 | 8.2075298  | 85.3573134 |
| C  | -0.0164389 | 0.8981120  | 88.9946438 |
| C  | 0.7455490  | -0.1910156 | 89.4361288 |
| C  | 0.1788338  | -1.0336477 | 90.4610374 |
| C  | 0.9221828  | -2.0619621 | 91.1150633 |
| C  | -1.1868822 | -0.8097206 | 90.8734433 |
| C  | -1.7661564 | -1.6644948 | 91.8596128 |
| C  | -1.9177713 | 0.2875241  | 90.3334817 |
| H  | -2.9524722 | 0.4498032  | 90.6709555 |
| C  | -1.3423910 | 1.1873058  | 89.4429054 |
| C  | 4.2929241  | 0.5534823  | 88.1561670 |
| C  | 4.6981750  | -0.7005015 | 87.7141393 |
| H  | 5.6937087  | -0.8133067 | 87.2584073 |
| C  | 3.8280188  | -1.8281354 | 87.7493002 |
| C  | 4.2360890  | -3.0848524 | 87.2084399 |
| C  | 2.4844388  | -1.6815152 | 88.2598515 |
| C  | 1.5888140  | -2.7846919 | 88.1206330 |
| C  | 2.0976449  | -0.4210627 | 88.8503631 |
| C  | 3.0130762  | 0.6351833  | 88.7847779 |
| O  | 0.5259371  | 1.7618078  | 88.0435578 |
| O  | 2.6774681  | 1.8563681  | 89.3700793 |
| P  | 1.6319365  | 2.8423529  | 88.5947469 |
| O  | 1.0391494  | 3.7474040  | 89.6983236 |
| O  | 2.2153759  | 3.5145250  | 87.3469011 |
| C  | -1.0246503 | -2.6760920 | 92.4512691 |
| C  | 0.3356904  | -2.8623033 | 92.0859558 |
| H  | -2.8125447 | -1.4906605 | 92.1562227 |
| H  | -1.4809744 | -3.3225804 | 93.2163191 |
| H  | 1.9777198  | -2.2109590 | 90.8482576 |
| H  | 0.9323546  | -3.6440724 | 92.5803631 |
| C  | 2.0113450  | -3.9877058 | 87.5709069 |
| C  | 3.3511646  | -4.1495264 | 87.1279769 |
| H  | 0.5458990  | -2.6746432 | 88.4475978 |
| H  | 1.2983049  | -4.8205560 | 87.4725202 |
| H  | 3.6774169  | -5.1108674 | 86.7026786 |

|   |            |            |            |   |            |            |            |
|---|------------|------------|------------|---|------------|------------|------------|
| H | 5.2674404  | -3.1842554 | 86.8349747 | H | 5.4612846  | 6.8715948  | 87.2599510 |
| C | -2.2796202 | 3.4838008  | 89.9537546 | H | 4.1296468  | 3.2007954  | 83.9467534 |
| C | -2.0309034 | 2.4445196  | 89.0050176 | H | 8.8119651  | 5.2737218  | 88.3031804 |
| C | -2.9144820 | 4.6599090  | 89.5152503 | H | 5.0064218  | 1.2025527  | 90.4077861 |
| C | -2.4064971 | 2.6286153  | 87.6464688 | H | 3.7702049  | 0.7478335  | 85.7908820 |
| C | -3.0527228 | 3.8225998  | 87.2666846 | H | 6.7985361  | 4.3484425  | 89.3667702 |
| C | -3.3262386 | 4.8504807  | 88.1827853 | C | 8.7596920  | 11.4328402 | 70.7009289 |
| H | -3.1030705 | 5.4641790  | 90.2445478 | C | 7.6037998  | 11.1907805 | 71.4506784 |
| C | -2.1727003 | 1.5609503  | 86.5796913 | C | 7.0684175  | 12.2101499 | 72.2694963 |
| H | -3.3507663 | 3.9414295  | 86.2148033 | C | 7.7009169  | 13.4696967 | 72.3289335 |
| C | -1.3246260 | 2.0924658  | 85.4097210 | C | 8.8594407  | 13.7110517 | 71.5764690 |
| H | -1.8549019 | 2.8906695  | 84.8491831 | C | 9.3874070  | 12.6927571 | 70.7635565 |
| H | -1.1006201 | 1.2774679  | 84.6910713 | H | 9.1800810  | 10.6411678 | 70.0618923 |
| H | -0.3610721 | 2.5021929  | 85.7708284 | H | 7.0892390  | 10.2177775 | 71.4241354 |
| C | -3.5079115 | 0.9690763  | 86.0902240 | C | 5.8421313  | 11.9588315 | 73.0671250 |
| H | -1.6064781 | 0.7307270  | 87.0466862 | H | 7.2763827  | 14.2592669 | 72.9708792 |
| H | -4.1347176 | 1.7387181  | 85.5929251 | H | 9.3539842  | 14.6933088 | 71.6213882 |
| H | -4.0948447 | 0.5498371  | 86.9325995 | H | 10.2970467 | 12.8808836 | 70.1722713 |
| H | -3.3300598 | 0.1559680  | 85.3563866 | O | 5.2231897  | 10.9048290 | 73.0816143 |
| C | -4.0846843 | 6.1200409  | 87.8041490 | H | 5.5028590  | 12.8428039 | 73.6868297 |
| C | -4.0980026 | 6.4222346  | 86.3007012 |   |            |            |            |
| H | -4.5611487 | 7.4116528  | 86.1089934 |   |            |            |            |
| H | -4.6939835 | 5.6727003  | 85.7397404 |   |            |            |            |
| H | -3.0757688 | 6.4313174  | 85.8720772 |   |            |            |            |
| C | -5.5224382 | 6.0673221  | 88.3612704 |   |            |            |            |
| H | -3.5701998 | 6.9643111  | 88.3179761 |   |            |            |            |
| H | -6.0647383 | 7.0126204  | 88.1518332 |   |            |            |            |
| H | -5.5280856 | 5.9034392  | 89.4572690 |   |            |            |            |
| H | -6.0889290 | 5.2351549  | 87.8934103 |   |            |            |            |
| C | -1.9269617 | 3.3518445  | 91.4367496 |   |            |            |            |
| C | -1.1779699 | 4.5691910  | 92.0041665 |   |            |            |            |
| H | -0.9410184 | 4.4053634  | 93.0750967 |   |            |            |            |
| H | -1.7682351 | 5.5052718  | 91.9350161 |   |            |            |            |
| H | -0.2185206 | 4.7228613  | 91.4754333 |   |            |            |            |
| C | -3.1977666 | 3.0702963  | 92.2641770 |   |            |            |            |
| H | -1.2507082 | 2.4806990  | 91.5453854 |   |            |            |            |
| H | -2.9436676 | 2.9016251  | 93.3310661 |   |            |            |            |
| H | -3.7411456 | 2.1770924  | 91.8959652 |   |            |            |            |
| H | -3.9004456 | 3.9285297  | 92.2133655 |   |            |            |            |
| H | 7.0448435  | 5.6540582  | 85.7898936 |   |            |            |            |
| H | 7.7624990  | 2.5415366  | 90.7761095 |   |            |            |            |
| H | 5.0112468  | 0.2104089  | 83.6895231 |   |            |            |            |
| C | 7.1445410  | 5.5178110  | 86.8889752 |   |            |            |            |
| H | 4.9780315  | 2.7672903  | 92.3257667 |   |            |            |            |
| H | 7.0669936  | 7.6746385  | 87.2690439 |   |            |            |            |
| H | 3.0329610  | 1.8094049  | 83.7055703 |   |            |            |            |
| C | 6.3984978  | 4.2358411  | 87.2384225 |   |            |            |            |
| C | 7.0578885  | 1.6840038  | 90.8052599 |   |            |            |            |
| C | 6.5209994  | 6.7530563  | 87.5598219 |   |            |            |            |
| H | 6.5561731  | 6.6758481  | 88.6667928 |   |            |            |            |
| C | 6.3241803  | 3.7648112  | 88.5617233 |   |            |            |            |
| C | 5.4919939  | 0.7955915  | 84.5010299 |   |            |            |            |
| H | 9.1002760  | 4.5240875  | 86.7022026 |   |            |            |            |
| C | 5.7718444  | 3.4763051  | 86.2374854 |   |            |            |            |
| C | 8.6450552  | 5.3972513  | 87.2123710 |   |            |            |            |
| H | 9.1922045  | 6.3082757  | 86.8921153 |   |            |            |            |
| H | 5.8006932  | 3.8501909  | 85.2020767 |   |            |            |            |
| C | 5.0414207  | 3.1611814  | 91.2901642 |   |            |            |            |
| H | 7.0377823  | 1.2993349  | 91.8462875 |   |            |            |            |
| H | 7.4709792  | 0.8885947  | 90.1519541 |   |            |            |            |
| C | 5.6634919  | 2.5688944  | 88.8939559 |   |            |            |            |
| C | 3.5460702  | 2.4206410  | 84.4768435 |   |            |            |            |
| C | 5.0956488  | 2.2729308  | 86.5121021 |   |            |            |            |
| H | 6.1049554  | 0.0996367  | 85.1086545 |   |            |            |            |
| H | 6.1850985  | 1.5237265  | 84.0295180 |   |            |            |            |
| C | 5.6482839  | 2.1057104  | 90.3489907 |   |            |            |            |
| C | 5.0572649  | 1.8063702  | 87.8588448 |   |            |            |            |
| C | 4.4339925  | 1.5212891  | 85.3547793 |   |            |            |            |
| H | 4.0223924  | 3.4480800  | 90.9655881 |   |            |            |            |
| H | 2.7783412  | 2.9339166  | 85.0853771 |   |            |            |            |
| H | 5.6578292  | 4.0835915  | 91.3228432 |   |            |            |            |

### agg-7-j-ma

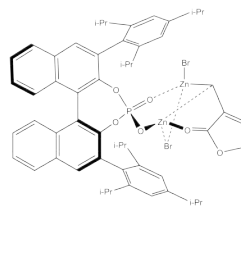

Energy (Hartree) = -11969.99362197

|    |            |            |            |
|----|------------|------------|------------|
| Zn | 0.8783184  | 5.6216602  | 89.1344160 |
| Br | 3.1992649  | 6.4183434  | 89.3309210 |
| H  | -0.9229387 | 10.2568248 | 87.2039699 |
| Br | 3.2859030  | 6.3914084  | 85.0930205 |
| H  | 0.4873659  | 5.6595700  | 86.0894128 |
| Zn | 2.5471782  | 5.4590908  | 87.0773072 |
| C  | -0.8282882 | 8.1951155  | 86.4320344 |
| C  | -1.4635906 | 9.2852789  | 87.2357898 |
| C  | -0.4771895 | 7.1738207  | 87.2629877 |
| C  | 0.1465851  | 5.8490243  | 87.1266566 |
| C  | -0.8104593 | 7.6403588  | 88.6254308 |
| O  | -1.4317849 | 8.8243934  | 88.6083809 |
| O  | -0.5183881 | 7.0571681  | 89.6884206 |
| H  | -2.5237956 | 9.4740823  | 86.9556079 |
| H  | -0.6046559 | 5.0513929  | 87.3409746 |
| H  | -0.7024958 | 8.2376141  | 85.3418823 |
| C  | -0.0155838 | 0.8909232  | 89.0001750 |
| C  | 0.7426441  | -0.2013100 | 89.4411549 |
| C  | 0.1703409  | -1.0460814 | 90.4608387 |
| C  | 0.9087607  | -2.0789904 | 91.1127091 |
| C  | -1.1956744 | -0.8202840 | 90.8704613 |
| C  | -1.7793503 | -1.6777110 | 91.8509354 |
| C  | -1.9215977 | 0.2808021  | 90.3326561 |
| H  | -2.9561890 | 0.4470659  | 90.6687023 |
| C  | -1.3421476 | 1.1813382  | 89.4459416 |
| C  | 4.2885832  | 0.5530445  | 88.1664674 |
| C  | 4.6952330  | -0.6979609 | 87.7179527 |
| H  | 5.6889112  | -0.8038131 | 87.2565302 |
| C  | 3.8290428  | -1.8284253 | 87.7510913 |
| C  | 4.2389101  | -3.0817237 | 87.2050019 |
| C  | 2.4859072  | -1.6874564 | 88.2640560 |
| C  | 1.5935779  | -2.7925968 | 88.1217805 |
| C  | 2.0968573  | -0.4302884 | 88.8598143 |
| C  | 3.0108604  | 0.6275826  | 88.8006505 |

|   |            |            |            |   |            |            |            |
|---|------------|------------|------------|---|------------|------------|------------|
| O | 0.5308533  | 1.7571741  | 88.0545892 | H | 9.1467736  | 6.3148265  | 86.8504445 |
| O | 2.6733868  | 1.8436763  | 89.3942442 | H | 5.7505196  | 3.8672557  | 85.2096631 |
| P | 1.6356795  | 2.8349562  | 88.6169818 | C | 5.0403399  | 3.1572458  | 91.3063097 |
| O | 1.0372861  | 3.7444062  | 89.7114988 | H | 7.0556564  | 1.3054199  | 91.8308573 |
| O | 2.2293228  | 3.5035704  | 87.3707299 | H | 7.4717309  | 0.9063763  | 90.1294663 |
| C | -1.0430990 | -2.6939659 | 92.4398067 | C | 5.6433360  | 2.5800758  | 88.9000399 |
| C | 0.3172217  | -2.8821091 | 92.0775662 | C | 3.5115139  | 2.4038998  | 84.4897567 |
| H | -2.8261475 | -1.5020382 | 92.1449128 | C | 5.0712411  | 2.2789176  | 86.5198758 |
| H | -1.5038967 | -3.3430237 | 93.1999039 | H | 6.1200111  | 0.1344260  | 85.1079424 |
| H | 1.9643195  | -2.2289069 | 90.8469632 | H | 6.1679273  | 1.5615365  | 84.0329892 |
| H | 0.9103641  | -3.6678263 | 92.5697550 | C | 5.6442716  | 2.1112353  | 90.3533406 |
| C | 2.0188008  | -3.9922542 | 87.5678382 | C | 5.0430796  | 1.8110925  | 87.8664468 |
| C | 3.3576649  | -4.1485553 | 87.1221695 | C | 4.4197378  | 1.5193767  | 85.3619753 |
| H | 0.5511548  | -2.6860294 | 88.4510420 | H | 4.0147129  | 3.4367046  | 90.9969943 |
| H | 1.3080490  | -4.8268174 | 87.4681498 | H | 2.7301825  | 2.8937191  | 85.1003704 |
| H | 3.6861975  | -5.1072000 | 86.6927270 | H | 5.6487734  | 4.0849078  | 91.3370066 |
| H | 5.2697829  | -3.1764469 | 86.8291320 | H | 5.4327185  | 6.9111992  | 87.3050959 |
| C | -2.2771832 | 3.4774557  | 89.9602166 | H | 4.0744027  | 3.2033123  | 83.9665140 |
| C | -2.0277120 | 2.4404572  | 89.0097043 | H | 8.7914629  | 5.2697293  | 88.2602272 |
| C | -2.9091575 | 4.6551863  | 89.5225157 | H | 5.0085616  | 1.2038364  | 90.4139935 |
| C | -2.3999053 | 2.6277445  | 87.6507491 | H | 3.7730306  | 0.7306100  | 85.7961033 |
| C | -3.0433655 | 3.8232224  | 87.2722446 | H | 6.7590996  | 4.3720420  | 89.3703341 |
| C | -3.3171835 | 4.8491662  | 88.1900122 | C | 8.7595708  | 11.4389238 | 70.6951073 |
| H | -3.0963086 | 5.4589436  | 90.2527925 | C | 7.6067112  | 11.1861265 | 71.4454139 |
| C | -2.1645094 | 1.5622240  | 86.5821534 | C | 7.0645839  | 12.1983988 | 72.2672111 |
| H | -3.3393802 | 3.9445277  | 86.2200514 | C | 7.6875044  | 13.4615195 | 72.3287674 |
| C | -1.3123697 | 2.0951388  | 85.4159694 | C | 8.8434350  | 13.7140108 | 71.5764769 |
| H | -1.8387481 | 2.8958953  | 84.8554008 | C | 9.3782109  | 12.7025017 | 70.7605623 |
| H | -1.0871834 | 1.2822553  | 84.6954801 | H | 9.1847684  | 10.6523073 | 70.0529967 |
| H | -0.3489907 | 2.5019368  | 85.7803590 | H | 7.0962340  | 10.2109718 | 71.4194176 |
| C | -3.4990781 | 0.9721988  | 86.0890956 | C | 5.8388672  | 11.9303969 | 73.0647212 |
| H | -1.5998776 | 0.7308453  | 87.0489265 | H | 7.2563858  | 14.2459033 | 72.9729415 |
| H | -4.1255783 | 1.7427367  | 85.5929037 | H | 9.3307457  | 14.6997695 | 71.6239339 |
| H | -4.0877629 | 0.5516889  | 86.9293845 | H | 10.2858739 | 12.8992071 | 70.1690256 |
| H | -3.3212115 | 0.1607716  | 85.3534815 | O | 5.2327269  | 10.8722591 | 73.0744971 |
| C | -4.0767402 | 6.1185337  | 87.8133881 | H | 5.4913219  | 12.8110057 | 73.6884135 |
| C | -4.0611499 | 6.4422901  | 86.3141718 |   |            |            |            |
| H | -4.5281747 | 7.4308473  | 86.1262455 |   |            |            |            |
| H | -4.6407654 | 5.6978678  | 85.7298611 |   |            |            |            |
| H | -3.0302975 | 6.4638511  | 85.9073195 |   |            |            |            |
| C | -5.5252757 | 6.0452750  | 88.3389182 |   |            |            |            |
| H | -3.5791983 | 6.9598378  | 88.3485385 |   |            |            |            |
| H | -6.0738759 | 6.9876640  | 88.1324060 |   |            |            |            |
| H | -5.5521930 | 5.8637019  | 89.4316748 |   |            |            |            |
| H | -6.0731311 | 5.2140781  | 87.8481126 |   |            |            |            |
| C | -1.9285997 | 3.3425519  | 91.4439862 |   |            |            |            |
| C | -1.1646662 | 4.5505731  | 92.0117867 |   |            |            |            |
| H | -0.9442108 | 4.3901341  | 93.0868134 |   |            |            |            |
| H | -1.7362349 | 5.4971298  | 91.9293313 |   |            |            |            |
| H | -0.1964324 | 4.6808650  | 91.4936986 |   |            |            |            |
| C | -3.2047782 | 3.0765400  | 92.2679547 |   |            |            |            |
| H | -1.2632623 | 2.4633763  | 91.5546020 |   |            |            |            |
| H | -2.9562338 | 2.9041327  | 93.3354874 |   |            |            |            |
| H | -3.7590568 | 2.1907593  | 91.8980437 |   |            |            |            |
| H | -3.8974423 | 3.9427203  | 92.2164957 |   |            |            |            |
| H | 6.9659740  | 5.6893278  | 85.7949686 |   |            |            |            |
| H | 7.7609112  | 2.5566951  | 90.7585896 |   |            |            |            |
| H | 5.0210228  | 0.2254070  | 83.6914322 |   |            |            |            |
| C | 7.0922189  | 5.5416656  | 86.8897244 |   |            |            |            |
| H | 4.9925530  | 2.7583564  | 92.3407245 |   |            |            |            |
| H | 7.0456494  | 7.6941561  | 87.2939738 |   |            |            |            |
| H | 3.0137487  | 1.7868845  | 83.7132054 |   |            |            |            |
| C | 6.3507490  | 4.2582418  | 87.2438656 |   |            |            |            |
| C | 7.0612154  | 1.6954401  | 90.7917046 |   |            |            |            |
| C | 6.4954425  | 6.7755790  | 87.5856313 |   |            |            |            |
| H | 6.5498058  | 6.6881918  | 88.6909853 |   |            |            |            |
| C | 6.2870814  | 3.7846431  | 88.5667478 |   |            |            |            |
| C | 5.4905743  | 0.8184840  | 84.5036220 |   |            |            |            |
| H | 9.0342658  | 4.5331699  | 86.6469706 |   |            |            |            |
| C | 5.7296088  | 3.4918956  | 86.2446327 |   |            |            |            |
| C | 8.5992497  | 5.4056730  | 87.1751382 |   |            |            |            |

### agg-7-j-mi; COSMO

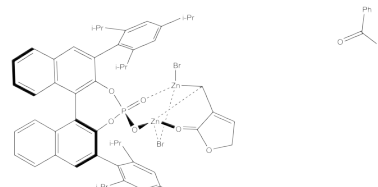

Energy (Hartree) = -11970.00847474

|    |            |            |            |
|----|------------|------------|------------|
| Zn | 0.9266293  | 5.8036272  | 88.8455392 |
| Br | 3.2690051  | 6.4963375  | 89.0937470 |
| C  | -0.4704791 | 8.1966083  | 85.7761951 |
| C  | -0.2092264 | 7.2448052  | 86.7158471 |
| C  | -0.5891519 | 7.8485724  | 88.0060655 |
| O  | -1.1396478 | 9.0533559  | 87.8515826 |
| C  | -1.0818312 | 9.3869132  | 86.4405330 |
| O  | -0.3968168 | 7.3458347  | 89.1356870 |
| C  | 0.3498880  | 5.8819519  | 86.7279736 |
| H  | -0.4857660 | 10.3207093 | 86.3482364 |
| H  | -2.1151398 | 9.6034657  | 86.0909878 |
| Zn | 2.6138513  | 5.4228681  | 86.8641131 |
| Br | 3.6597321  | 6.1359898  | 84.9154743 |
| H  | 0.6634664  | 5.5648022  | 85.7124849 |
| H  | -0.4436690 | 5.1493173  | 87.0119467 |
| H  | -0.2966370 | 8.1311744  | 84.6937159 |
| C  | -0.1938829 | 1.1103964  | 88.9520725 |
| C  | 0.4747296  | 0.0272723  | 89.5365479 |
| C  | -0.2122091 | -0.7033530 | 90.5739604 |
| C  | 0.4232640  | -1.7098505 | 91.3619014 |
| C  | -1.5917251 | -0.3837492 | 90.8570440 |
| C  | -2.2897596 | -1.1299531 | 91.8544219 |

|   |            |            |            |   |            |            |            |
|---|------------|------------|------------|---|------------|------------|------------|
| C | -2.2202943 | 0.7002634  | 90.1790627 | H | 4.6302641  | 3.0225896  | 92.5171873 |
| H | -3.2671366 | 0.9381473  | 90.4208451 | H | 7.3283424  | 7.4165783  | 87.2903633 |
| C | -1.5326248 | 1.4970322  | 89.2702646 | H | 3.2752752  | 1.4401268  | 83.8703519 |
| C | 4.1417425  | 0.5112521  | 88.4897040 | C | 6.4729031  | 4.0215369  | 87.4506252 |
| C | 4.5171570  | -0.7904555 | 88.1788288 | C | 6.7588600  | 1.7377516  | 91.2413177 |
| H | 5.5370216  | -0.9821178 | 87.8118417 | C | 6.7158736  | 6.5479419  | 87.6101791 |
| C | 3.5922977  | -1.8730487 | 88.2322514 | H | 6.6877693  | 6.5469553  | 88.7199963 |
| C | 3.9775751  | -3.1855817 | 87.8232727 | C | 6.2819304  | 3.6623379  | 88.7970850 |
| C | 2.2227597  | -1.6281209 | 88.6220774 | C | 5.6272777  | 0.4129961  | 84.9266188 |
| C | 1.2870399  | -2.6992294 | 88.4970534 | H | 9.2077455  | 4.1343017  | 87.0453305 |
| C | 1.8548511  | -0.3087518 | 89.0812727 | C | 5.8890995  | 3.2069422  | 86.4673492 |
| C | 2.8239314  | 0.6981284  | 89.0077998 | C | 8.7757183  | 5.0620497  | 87.4726111 |
| O | 0.4632394  | 1.8673075  | 87.9825836 | H | 9.3885016  | 5.9200482  | 87.1257816 |
| O | 2.5056615  | 1.9758839  | 89.4687974 | H | 6.0099614  | 3.4939676  | 85.4110633 |
| P | 1.5752639  | 2.9406586  | 88.5358856 | C | 4.7843785  | 3.3300705  | 91.4620086 |
| O | 0.9431138  | 3.9560626  | 89.5142605 | H | 6.6478207  | 1.4379954  | 92.3042966 |
| O | 2.2870617  | 3.4836147  | 87.2921879 | H | 7.1792653  | 0.8767488  | 90.6826988 |
| C | -1.6508532 | -2.1255181 | 92.5782787 | C | 5.5463706  | 2.5236107  | 89.1703129 |
| C | -0.2779489 | -2.4028657 | 92.3393865 | C | 3.7504368  | 2.0930437  | 84.6317238 |
| H | -3.3454333 | -0.8848106 | 92.0506483 | C | 5.1427956  | 2.0561505  | 86.7826003 |
| H | -2.1988771 | -2.6882377 | 93.3492328 | H | 6.1678627  | -0.2514419 | 85.6307602 |
| H | 1.4868104  | -1.9284903 | 91.1933849 | H | 6.3798500  | 1.0786104  | 84.4540629 |
| H | 0.2366995  | -3.1701751 | 92.9374906 | C | 5.4060164  | 2.1792811  | 90.6513759 |
| C | 1.6900775  | -3.9594358 | 88.0761070 | C | 4.9842666  | 1.7031453  | 88.1548439 |
| C | 3.0498837  | -4.2139368 | 87.7544783 | C | 4.5380540  | 1.2376433  | 85.6397527 |
| H | 0.2291059  | -2.5180897 | 88.7306355 | H | 3.8052780  | 3.6318555  | 91.0421563 |
| H | 0.9462413  | -4.7658234 | 87.9851037 | H | 2.9581820  | 2.6734391  | 85.1404108 |
| H | 3.3595580  | -5.2194017 | 87.4308360 | H | 5.4391267  | 4.2261346  | 91.4693709 |
| H | 5.0280842  | -3.3592409 | 87.5416230 | H | 5.6823494  | 6.7018454  | 87.2426815 |
| C | -2.3816185 | 3.8690848  | 89.5275700 | H | 4.3985601  | 2.8136718  | 84.0923355 |
| C | -2.1171866 | 2.7463684  | 88.6839990 | H | 8.8776598  | 5.0026012  | 88.5768170 |
| C | -2.9148668 | 5.0357812  | 88.9503295 | H | 4.7201940  | 1.3107024  | 90.7310681 |
| C | -2.3747766 | 2.8391613  | 87.2890830 | H | 3.8156034  | 0.5225610  | 86.0821089 |
| C | -2.9226008 | 4.0288643  | 86.7680224 | H | 6.7223829  | 4.2904204  | 89.5879229 |
| C | -3.2100637 | 5.1387164  | 87.5779536 | C | -0.5876642 | 4.9371613  | 69.8270149 |
| H | -3.1158569 | 5.9041143  | 89.5983094 | C | -0.5989563 | 5.3962712  | 71.1483436 |
| C | -2.1175612 | 1.6797872  | 86.3285309 | C | -0.7862292 | 6.7710139  | 71.4152305 |
| H | -3.1303755 | 4.0781879  | 85.6891607 | C | -0.9613866 | 7.6772556  | 70.3484264 |
| C | -1.1557766 | 2.0760897  | 85.1931701 | C | -0.9502829 | 7.2155710  | 69.0243018 |
| H | -1.5977409 | 2.8517738  | 84.5332071 | C | -0.7633325 | 5.8465046  | 68.7651326 |
| H | -0.9216888 | 1.1969646  | 84.5582584 | H | -0.4417949 | 3.8668715  | 69.6148024 |
| H | -0.2020309 | 2.4669517  | 85.5984400 | H | -0.4645454 | 4.7122459  | 72.0005507 |
| C | -3.4417619 | 1.1149757  | 85.7804803 | C | -0.7994978 | 7.2642377  | 72.8150940 |
| H | -1.6333955 | 0.8634878  | 86.9006392 | H | -1.1064725 | 8.7483714  | 70.5660836 |
| H | -3.9875518 | 1.8718155  | 85.1788836 | H | -1.0871227 | 7.9211949  | 68.1907520 |
| H | -4.1119334 | 0.7920692  | 86.6029237 | H | -0.7542479 | 5.4825338  | 67.7259359 |
| H | -3.2527933 | 0.2388981  | 85.1262641 | O | -0.6605621 | 6.5601605  | 73.8046380 |
| C | -3.8689822 | 6.4072151  | 87.0428026 | H | -0.9532233 | 8.3812723  | 72.9113208 |
| C | -3.7305722 | 6.5999102  | 85.5275428 |   |            |            |            |
| H | -4.1237297 | 7.5924549  | 85.2267344 |   |            |            |            |
| H | -4.3105849 | 5.8392661  | 84.9648278 |   |            |            |            |
| H | -2.6746226 | 6.5327476  | 85.1973582 |   |            |            |            |
| C | -5.3529608 | 6.4507589  | 87.4627477 |   |            |            |            |
| H | -3.3648994 | 7.2652691  | 87.5440302 |   |            |            |            |
| H | -5.8307823 | 7.3981608  | 87.1377412 |   |            |            |            |
| H | -5.4673597 | 6.3668904  | 88.5618966 |   |            |            |            |
| H | -5.9099479 | 5.6087083  | 87.0011977 |   |            |            |            |
| C | -2.1539836 | 3.8399589  | 91.0403036 |   |            |            |            |
| C | -1.3789649 | 5.0572776  | 91.5721708 |   |            |            |            |
| H | -1.2445543 | 4.9729508  | 92.6698393 |   |            |            |            |
| H | -1.9002408 | 6.0157696  | 91.3750075 |   |            |            |            |
| H | -0.3699849 | 5.1097077  | 91.1214618 |   |            |            |            |
| C | -3.5001953 | 3.6964815  | 91.7789313 |   |            |            |            |
| H | -1.5424745 | 2.9452948  | 91.2716846 |   |            |            |            |
| H | -3.3412101 | 3.6017668  | 92.8730183 |   |            |            |            |
| H | -4.0664002 | 2.8071782  | 91.4366093 |   |            |            |            |
| H | -4.1431911 | 4.5847346  | 91.6044059 |   |            |            |            |
| H | 7.2678711  | 5.3026586  | 85.9495300 |   |            |            |            |
| H | 7.5028798  | 2.5608093  | 91.1988230 |   |            |            |            |
| H | 5.1852300  | -0.2193459 | 84.1286291 |   |            |            |            |
| C | 7.3029103  | 5.2381634  | 87.0589903 |   |            |            |            |

agg-7-j-mi

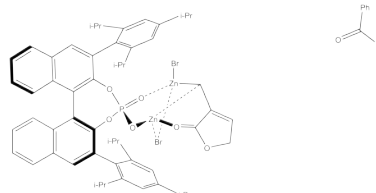

Energy (Hartree) = -11969.99370613

|    |            |            |            |
|----|------------|------------|------------|
| Zn | 0.9327415  | 5.7912564  | 88.7918632 |
| Br | 3.2699387  | 6.4930680  | 89.1116906 |
| C  | -0.4319689 | 8.2106807  | 85.7699180 |
| C  | -0.1958004 | 7.2463043  | 86.7032322 |
| C  | -0.6055491 | 7.8371563  | 87.9947704 |
| O  | -1.1622641 | 9.0427117  | 87.8366519 |
| C  | -1.0686794 | 9.3904672  | 86.4338518 |
| O  | -0.4240845 | 7.3300184  | 89.1197061 |
| C  | 0.3683942  | 5.8881581  | 86.7197881 |
| H  | -0.4782917 | 10.3308710 | 86.3682457 |
| H  | -2.0941910 | 9.6031077  | 86.0579095 |
| Zn | 2.7405528  | 5.3865119  | 86.8924172 |

|    |            |            |            |   |            |            |            |
|----|------------|------------|------------|---|------------|------------|------------|
| Br | 3.6824467  | 6.1127743  | 84.9081725 | H | -0.3610092 | 5.0942523  | 91.1259718 |
| H  | 0.7752774  | 5.5999338  | 85.7300651 | C | -3.4996412 | 3.7010706  | 91.7823969 |
| H  | -0.4359933 | 5.1445611  | 86.9356256 | H | -1.5450943 | 2.9424981  | 91.2747190 |
| H  | -0.2239255 | 8.1579129  | 84.6928983 | H | -3.3412068 | 3.6056438  | 92.8764610 |
| C  | -0.1921219 | 1.1106630  | 88.9557891 | H | -4.0700824 | 2.8144070  | 91.4403222 |
| C  | 0.4737846  | 0.0253935  | 89.5398885 | H | -4.1403127 | 4.5911052  | 91.6088711 |
| C  | -0.2157626 | -0.7057971 | 90.5747407 | H | 7.2479473  | 5.3098113  | 85.9464432 |
| C  | 0.4176817  | -1.7140275 | 91.3616956 | H | 7.5060957  | 2.5620368  | 91.1867172 |
| C  | -1.5950850 | -0.3853880 | 90.8566083 | H | 5.1864203  | -0.2145185 | 84.1292605 |
| C  | -2.2939079 | -1.1322489 | 91.8522195 | C | 7.2843330  | 5.2464213  | 87.0558766 |
| C  | -2.2210040 | 0.6997261  | 90.1787268 | H | 4.6414654  | 3.0186733  | 92.5253050 |
| H  | -3.2678192 | 0.9398813  | 90.4184628 | H | 7.3190346  | 7.4245574  | 87.2862888 |
| C  | -1.5313484 | 1.4971698  | 89.2722411 | H | 3.2668267  | 1.4327756  | 83.8719752 |
| C  | 4.1396429  | 0.5114575  | 88.4940117 | C | 6.4533806  | 4.0311560  | 87.4496284 |
| C  | 4.5137611  | -0.7893438 | 88.1784822 | C | 6.7623967  | 1.7389993  | 91.2320862 |
| H  | 5.5325400  | -0.9778089 | 87.8068287 | C | 6.7019527  | 6.5588797  | 87.6046997 |
| C  | 3.5903755  | -1.8728082 | 88.2312981 | H | 6.6695240  | 6.5595845  | 88.7143264 |
| C  | 3.9746817  | -3.1839958 | 87.8189670 | C | 6.2658340  | 3.6713835  | 88.7963840 |
| C  | 2.2215369  | -1.6294819 | 88.6240195 | C | 5.6244538  | 0.4203243  | 84.9273556 |
| C  | 1.2864556  | -2.7007821 | 88.4986206 | H | 9.1843768  | 4.1341380  | 87.0458026 |
| C  | 1.8542708  | -0.3114147 | 89.0868459 | C | 5.8708898  | 3.2138707  | 86.4676138 |
| C  | 2.8232824  | 0.6957025  | 89.0171981 | C | 8.7568144  | 5.0657623  | 87.4685473 |
| O  | 0.4675144  | 1.8697070  | 87.9903913 | H | 9.3732017  | 5.9195391  | 87.1180245 |
| O  | 2.5048510  | 1.9705250  | 89.4844328 | H | 5.9886969  | 3.5015169  | 85.4113042 |
| P  | 1.5804580  | 2.9395787  | 88.5518893 | C | 4.7871260  | 3.3285859  | 91.4697769 |
| O  | 0.9475873  | 3.9609044  | 89.5210269 | H | 6.6591365  | 1.4363517  | 92.2949855 |
| O  | 2.3001299  | 3.4769365  | 87.3085243 | H | 7.1801379  | 0.8804980  | 90.6680159 |
| C  | -1.6571278 | -2.1291353 | 92.5750531 | C | 5.5377133  | 2.5286834  | 89.1711636 |
| C  | -0.2849317 | -2.4076832 | 92.3369448 | C | 3.7369571  | 2.0880446  | 84.6342554 |
| H  | -3.3494036 | -0.8858790 | 92.0481900 | C | 5.1319459  | 2.0588138  | 86.7842623 |
| H  | -2.2064114 | -2.6920493 | 93.3449394 | H | 6.1705154  | -0.2407237 | 85.6303552 |
| H  | 1.4810031  | -1.9327343 | 91.1924005 | H | 6.3727569  | 1.0906742  | 84.4551560 |
| H  | 0.2286193  | -3.1763474 | 92.9343145 | C | 5.4055264  | 2.1813244  | 90.6522628 |
| C  | 1.6894559  | -3.9598713 | 88.0754775 | C | 4.9783247  | 1.7051768  | 88.1568689 |
| C  | 3.0481780  | -4.2128374 | 87.7505226 | C | 4.5304248  | 1.2374271  | 85.6416774 |
| H  | 0.2292314  | -2.5200129 | 88.7351479 | H | 3.8035933  | 3.6284990  | 91.0595309 |
| H  | 0.9460074  | -4.7665721 | 87.9854310 | H | 2.9390576  | 2.6617168  | 85.1416611 |
| H  | 3.3580503  | -5.2173902 | 87.4246159 | H | 5.4389542  | 4.2267213  | 91.4752023 |
| H  | 5.0245741  | -3.3561012 | 87.5341652 | H | 5.6714600  | 6.7194129  | 87.2321932 |
| C  | -2.3821992 | 3.8680083  | 89.5306601 | H | 4.3779149  | 2.8151528  | 84.0953652 |
| C  | -2.1162890 | 2.7464549  | 88.6866236 | H | 8.8603627  | 5.0102694  | 88.5727223 |
| C  | -2.9178169 | 5.0334851  | 88.9539064 | H | 4.7210681  | 1.3118040  | 90.7337269 |
| C  | -2.3750091 | 2.8388178  | 87.2920603 | H | 3.8129720  | 0.5172759  | 86.0838848 |
| C  | -2.9251863 | 4.0275022  | 86.7717214 | H | 6.7054193  | 4.3011397  | 89.5861972 |
| C  | -3.2139333 | 5.1363681  | 87.5822150 | C | -0.5890182 | 4.9390793  | 69.8243669 |
| H  | -3.1177180 | 5.9018269  | 89.6022950 | C | -0.5970932 | 5.3959793  | 71.1461886 |
| C  | -2.1158853 | 1.6795823  | 86.3318929 | C | -0.7834687 | 6.7694824  | 71.4158767 |
| H  | -3.1344391 | 4.0758111  | 85.6930898 | C | -0.9606650 | 7.6764201  | 70.3512583 |
| C  | -1.1526234 | 2.0758077  | 85.1980427 | C | -0.9538856 | 7.2173454  | 69.0265253 |
| H  | -1.5932111 | 2.8511316  | 84.5367402 | C | -0.7682449 | 5.8492570  | 68.7646050 |
| H  | -0.9168922 | 1.1971447  | 84.5633116 | H | -0.4424815 | 3.8692693  | 69.6100215 |
| H  | -0.1993953 | 2.4666722  | 85.6040737 | H | -0.4610455 | 4.7140716  | 71.9998463 |
| C  | -3.4387808 | 1.1127331  | 85.7832545 | C | -0.7936081 | 7.2561065  | 72.8205223 |
| H  | -1.6314478 | 0.8642738  | 86.9051707 | H | -1.1045315 | 8.7473147  | 70.5714450 |
| H  | -3.9859447 | 1.8678525  | 85.1808560 | H | -1.0927785 | 7.9243258  | 68.1944385 |
| H  | -4.1094078 | 0.7896867  | 86.6050599 | H | -0.7634375 | 5.4870449  | 67.7247617 |
| H  | -3.2487019 | 0.2367117  | 85.1293959 | O | -0.6530519 | 6.5482952  | 73.8036006 |
| C  | -3.8764752 | 6.4039781  | 87.0489162 | H | -0.9476433 | 8.3748670  | 72.9206819 |
| C  | -3.7322241 | 6.6024975  | 85.5348462 |   |            |            |            |
| H  | -4.1315717 | 7.5926969  | 85.2337715 |   |            |            |            |
| H  | -4.3046557 | 5.8401194  | 84.9668286 |   |            |            |            |
| H  | -2.6742211 | 6.5431546  | 85.2097733 |   |            |            |            |
| C  | -5.3620678 | 6.4404624  | 87.4631111 |   |            |            |            |
| H  | -3.3772184 | 7.2627114  | 87.5539201 |   |            |            |            |
| H  | -5.8439012 | 7.3868719  | 87.1408172 |   |            |            |            |
| H  | -5.4801257 | 6.3507721  | 88.5612437 |   |            |            |            |
| H  | -5.9140988 | 5.5977169  | 86.9973679 |   |            |            |            |
| C  | -2.1533224 | 3.8393266  | 91.0433152 |   |            |            |            |
| C  | -1.3715897 | 5.0533122  | 91.5731126 |   |            |            |            |
| H  | -1.2429959 | 4.9729515  | 92.6717797 |   |            |            |            |
| H  | -1.8837559 | 6.0154072  | 91.3697026 |   |            |            |            |

### 7.4.3 Pathways starting from 13d-mi TS-7-d-ma; COSMO

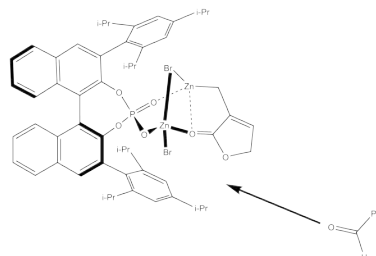



Energy (Hartree)= -11969.99959026

|    |            |            |            |
|----|------------|------------|------------|
| Zn | 2.4200409  | 0.3329882  | 0.9445263  |
| Br | 4.2744712  | 0.7066379  | -0.3367154 |
| C  | 1.2344552  | 5.1545799  | 1.5305136  |
| C  | 0.6137904  | 4.0025365  | 1.9319216  |
| C  | 1.6517178  | 2.9668132  | 1.8322030  |
| O  | 2.8295180  | 3.4665989  | 1.4576963  |
| C  | 2.6644575  | 4.8842212  | 1.2262201  |
| O  | 1.4947014  | 1.7348847  | 2.0169066  |
| C  | -0.7658442 | 3.6764315  | 2.3311883  |
| H  | 2.9503420  | 5.1114874  | 0.1764696  |
| H  | 3.3739238  | 5.4279781  | 1.8878964  |
| Zn | -1.5916174 | 1.9162037  | 1.8048467  |
| Br | -3.6008675 | 1.2986502  | 2.8771553  |
| C  | -0.9454651 | -3.3389528 | 1.0565531  |
| C  | -1.2041346 | -4.0091452 | -0.1422920 |
| C  | -0.7152096 | -5.3625728 | -0.2738653 |
| C  | -0.7680136 | -6.0879702 | -1.5021765 |
| C  | -0.1058167 | -6.0008616 | 0.8690632  |
| C  | 0.3556509  | -7.3465296 | 0.7524670  |
| C  | 0.0555748  | -5.2734046 | 2.0845738  |
| H  | 0.5064243  | -5.7830604 | 2.9490903  |
| C  | -0.3166683 | -3.9406786 | 2.1946385  |
| C  | -2.0169752 | -1.3535356 | -2.8002406 |
| C  | -3.0731620 | -1.9504902 | -3.4768063 |
| H  | -3.5108080 | -1.4429967 | -4.3505126 |
| C  | -3.6449130 | -3.1796076 | -3.0354289 |
| C  | -4.7872686 | -3.7352767 | -3.6867055 |
| C  | -3.0916270 | -3.8557242 | -1.8848172 |
| C  | -3.7559339 | -5.0241876 | -1.4044801 |
| C  | -1.9163228 | -3.3088074 | -1.2488528 |
| C  | -1.4568905 | -2.0655255 | -1.6939243 |
| O  | -1.3421567 | -2.0027734 | 1.1841714  |
| O  | -0.3447658 | -1.4927331 | -1.0910357 |
| P  | -0.3958056 | -0.8951443 | 0.4352520  |
| O  | 1.0671609  | -1.0195750 | 0.1655505  |
| O  | -1.0575955 | 0.4751221  | 0.5132837  |
| C  | 0.2597078  | -8.0336444 | -0.4486126 |
| C  | -0.2924465 | -7.3897781 | -1.5877290 |
| H  | 0.8054794  | -7.8251144 | 1.6366294  |
| H  | 0.6249310  | -9.0691017 | -0.5255339 |
| H  | -1.1829002 | -5.6003858 | -2.3949357 |
| H  | -0.3397037 | -7.9239922 | -2.5489752 |
| C  | -4.8768730 | -5.5284133 | -2.0502517 |
| C  | -5.3901070 | -4.8902724 | -3.2108867 |
| H  | -3.3760418 | -5.5226935 | -0.5018198 |
| H  | -5.3751036 | -6.4265649 | -1.6543625 |
| H  | -6.2748070 | -5.3032273 | -3.7190791 |
| H  | -5.1922929 | -3.2154428 | -4.5692374 |
| C  | 1.1780336  | -2.5748573 | 3.7306090  |
| C  | -0.1117503 | -3.0791111 | 3.4002913  |
| C  | 1.2682177  | -1.5626705 | 4.7037378  |
| C  | -1.2580165 | -2.6370574 | 4.1161287  |
| C  | -1.1144860 | -1.6114442 | 5.0653681  |
| C  | 0.1349411  | -1.0317510 | 5.3452900  |
| H  | 2.2539817  | -1.1392021 | 4.9539051  |
| C  | -2.6181402 | -3.3027210 | 3.9141224  |
| H  | -2.0126137 | -1.2395360 | 5.5810031  |
| C  | -3.7662153 | -2.3123055 | 3.6821236  |
| H  | -3.9553622 | -1.6766827 | 4.5717552  |
| H  | -4.7064524 | -2.8591652 | 3.4621306  |
| H  | -3.5466949 | -1.6311467 | 2.8380920  |
| C  | -2.9091385 | -4.2454765 | 5.0991852  |
| H  | -2.5485714 | -3.9410466 | 3.0094375  |
| H  | -2.9866916 | -3.6756430 | 6.0491068  |
| H  | -2.1048829 | -4.9993113 | 5.2244202  |
| H  | -3.8675531 | -4.7843265 | 4.9471382  |
| C  | 0.2630570  | 0.1970105  | 6.2354640  |
| C  | -0.1193330 | 1.4514267  | 5.4221620  |
| H  | 0.0215813  | 2.3771861  | 6.0188584  |

|   |            |            |            |
|---|------------|------------|------------|
| H | -1.1822040 | 1.4050363  | 5.1015589  |
| H | 0.4985488  | 1.5297273  | 4.5045480  |
| C | -0.5444852 | 0.1043922  | 7.5387837  |
| H | 1.3379054  | 0.2886999  | 6.5090133  |
| H | -0.3542678 | 0.9901119  | 8.1790674  |
| H | -0.2787083 | -0.8032524 | 8.1177143  |
| H | -1.6362528 | 0.0740824  | 7.3419537  |
| C | 2.4442055  | -3.1399603 | 3.0876460  |
| C | 3.5587151  | -2.1144124 | 2.8471201  |
| H | 4.4277869  | -2.5850735 | 2.3462249  |
| H | 3.9255784  | -1.6442420 | 3.7813794  |
| H | 3.2210796  | -1.2965127 | 2.1746085  |
| C | 2.9995078  | -4.2983312 | 3.9441112  |
| H | 2.1595070  | -3.5513599 | 2.0972780  |
| H | 3.8711983  | -4.7763323 | 3.4509672  |
| H | 2.2340574  | -5.0785859 | 4.1226116  |
| H | 3.3269638  | -3.9263412 | 4.9375242  |
| H | -0.5011647 | 4.7155293  | -3.1721402 |
| H | 1.4713318  | -0.1413801 | -5.8246074 |
| H | -5.7245650 | 1.5100736  | -3.1436096 |
| C | 0.3230516  | 3.9685470  | -3.1910618 |
| H | 2.6290805  | -2.0126110 | -3.5240490 |
| H | 1.4831948  | 5.0980194  | -1.6932535 |
| H | -5.0287403 | 1.6424266  | -0.6878787 |
| C | -0.3254120 | 2.5950981  | -3.2798598 |
| C | 0.9109292  | -1.0395782 | -5.4895971 |
| C | 1.0740938  | 4.0791591  | -1.8495201 |
| H | 1.9165807  | 3.3548723  | -1.8045298 |
| C | 0.4165696  | 1.4493215  | -3.6162749 |
| C | -4.6623725 | 1.6203944  | -3.4454058 |
| H | 0.6944774  | 4.2058329  | -5.3458242 |
| C | -1.6675544 | 2.4245557  | -2.9066980 |
| C | 1.2318396  | 4.3090975  | -4.3815534 |
| H | 1.5990812  | 5.3535331  | -4.3062762 |
| H | -2.2614694 | 3.3185817  | -2.6543562 |
| C | 2.0691535  | -1.1025748 | -3.2250613 |
| H | 1.4816237  | -1.9345770 | -5.8139232 |
| H | -0.0645039 | -1.0426013 | -6.0174549 |
| C | -0.1325830 | 0.1589487  | -3.5374140 |
| C | -3.9698620 | 1.7519138  | -0.9992098 |
| C | -2.2661369 | 1.1548981  | -2.8003446 |
| H | -4.5206592 | 1.0883398  | -4.4086391 |
| H | -4.4748279 | 2.6990894  | -3.6303714 |
| C | 0.7197888  | -1.0367263 | -3.9602072 |
| C | -1.4785915 | 0.0079273  | -3.0983877 |
| C | -3.7255145 | 1.0689117  | -2.3543795 |
| H | 1.9270873  | -1.1346230 | -2.1280505 |
| H | -3.3496190 | 1.2896956  | -0.2080980 |
| H | 2.7137060  | -0.2294997 | -3.4557978 |
| H | 0.3968088  | 3.8478362  | -1.0026718 |
| H | -3.7449273 | 2.8387291  | -1.0287505 |
| H | 2.1238869  | 3.6489952  | -4.4193839 |
| H | 0.1593266  | -1.9594693 | -3.7051562 |
| H | -3.9761261 | -0.0014088 | -2.2171068 |
| H | 1.4660142  | 1.5584747  | -3.9315156 |
| H | -1.4584329 | 4.5131089  | 2.1123735  |
| H | -0.7988892 | 3.5167476  | 3.4335500  |
| H | 0.7810566  | 6.1470916  | 1.4046115  |
| C | 5.9724656  | 9.6875109  | -2.9133172 |
| C | 5.1066408  | 8.7821803  | -2.2923452 |
| C | 4.7764847  | 7.5685428  | -2.9382824 |
| C | 5.3199107  | 7.2735027  | -4.2076542 |
| C | 6.1875829  | 8.1830727  | -4.8276942 |
| C | 6.5126357  | 9.3879018  | -4.1800817 |
| H | 6.2332422  | 10.6336808 | -2.4150542 |
| H | 4.6686079  | 8.9871307  | -1.3034803 |
| C | 3.8636518  | 6.6022153  | -2.2957607 |
| H | 5.0566077  | 6.3247085  | -4.7034024 |
| H | 6.6130585  | 7.9556354  | -5.8167351 |
| H | 7.1943575  | 10.1029122 | -4.6662111 |
| O | 3.3351359  | 6.7601517  | -1.1981909 |

H 3.6686096 5.6673974 -2.8968846

### TS-7-d-ma

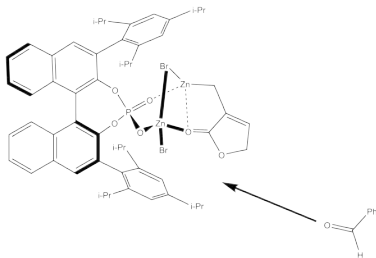

Energy (Hartree)= -11969.98520766  
number of imaginary frequencies: 4

|    |            |            |            |
|----|------------|------------|------------|
| Zn | 2.4491676  | 0.3081680  | 0.9292661  |
| Br | 4.3356808  | 0.6737956  | -0.2952001 |
| C  | 1.3005628  | 5.1361689  | 1.5413384  |
| C  | 0.6785463  | 3.9882908  | 1.9531547  |
| C  | 1.7118640  | 2.9464777  | 1.8412352  |
| O  | 2.8874816  | 3.4415011  | 1.4507247  |
| C  | 2.7252620  | 4.8571856  | 1.2154053  |
| O  | 1.5527349  | 1.7171703  | 2.0301528  |
| C  | -0.6976149 | 3.6658780  | 2.3592806  |
| H  | 2.9943919  | 5.0775341  | 0.1598840  |
| H  | 3.4498427  | 5.4008782  | 1.8611463  |
| Zn | -1.5517416 | 1.9141665  | 1.8305597  |
| Br | -3.5425206 | 1.3073083  | 2.9161432  |
| C  | -0.9310450 | -3.3328971 | 1.0473127  |
| C  | -1.1843065 | -4.0037347 | -0.1523986 |
| C  | -0.6938451 | -5.3567535 | -0.2809155 |
| C  | -0.7393416 | -6.0819513 | -1.5092783 |
| C  | -0.0910922 | -5.9949033 | 0.8653008  |
| C  | 0.3713358  | -7.3398336 | 0.7504237  |
| C  | 0.0612066  | -5.2677355 | 2.0818881  |
| H  | 0.5045665  | -5.7773709 | 2.9503053  |
| C  | -0.3109715 | -3.9350718 | 2.1900646  |
| C  | -2.0104651 | -1.3447530 | -2.8033457 |
| C  | -3.0643381 | -1.9443341 | -3.4805728 |
| H  | -3.5064059 | -1.4335526 | -4.3501477 |
| C  | -3.6282034 | -3.1786706 | -3.0446168 |
| C  | -4.7670951 | -3.7387387 | -3.6970911 |
| C  | -3.0700360 | -3.8563047 | -1.8973958 |
| C  | -3.7272298 | -5.0305715 | -1.4221674 |
| C  | -1.8972192 | -3.3056331 | -1.2600285 |
| C  | -1.4443168 | -2.0588368 | -1.7017652 |
| O  | -1.3265356 | -1.9973305 | 1.1739957  |
| O  | -0.3335257 | -1.4834336 | -1.1010801 |
| P  | -0.3789839 | -0.8898784 | 0.4270439  |
| O  | 1.0861372  | -1.0270450 | 0.8992911  |
| O  | -1.0344646 | 0.4825652  | 0.5143595  |
| C  | 0.2828187  | -8.0267568 | -0.4507426 |
| C  | -0.2629604 | -7.3831668 | -1.5923153 |
| H  | 0.8165023  | -7.8181871 | 1.6370775  |
| H  | 0.6492044  | -9.0619160 | -0.5255384 |
| H  | -1.1500936 | -5.5934470 | -2.4033612 |
| H  | -0.3047217 | -7.9171128 | -2.5539100 |
| C  | -4.8448242 | -5.5387678 | -2.0696216 |
| C  | -5.3624633 | -4.8991283 | -3.2266917 |
| H  | -3.3434969 | -5.5297896 | -0.5217302 |
| H  | -5.3371108 | -6.4416666 | -1.6772703 |
| H  | -6.2448091 | -5.3150800 | -3.7364135 |
| H  | -5.1758316 | -3.2171365 | -4.5768524 |

|   |            |            |            |
|---|------------|------------|------------|
| C | 1.1638195  | -2.5749678 | 3.7516505  |
| C | -0.1213907 | -3.0756756 | 3.3997953  |
| C | 1.2410360  | -1.5686841 | 4.7313934  |
| C | -1.2777516 | -2.6334030 | 4.0993423  |
| C | -1.1465068 | -1.6112516 | 5.0537977  |
| C | 0.0997798  | -1.0377118 | 5.3575432  |
| H | 2.2238620  | -1.1506705 | 5.0015293  |
| C | -2.6359832 | -3.2965028 | 3.8765227  |
| H | -2.0523730 | -1.2364343 | 5.5532069  |
| C | -3.7807310 | -2.3061058 | 3.6287785  |
| H | -3.9841598 | -1.6707488 | 4.5152034  |
| H | -4.7173192 | -2.8531243 | 3.3947411  |
| H | -3.5516700 | -1.6235393 | 2.7886857  |
| C | -2.9432847 | -4.2399498 | 5.0569270  |
| H | -2.5538010 | -3.9348644 | 2.9728833  |
| H | -3.0335119 | -3.6709431 | 6.0060217  |
| H | -2.1411677 | -4.9938906 | 5.1936712  |
| H | -3.8998540 | -4.7781179 | 4.8918996  |
| C | 0.2195262  | 0.1824327  | 6.2605224  |
| C | -0.1458133 | 1.4468272  | 5.4555804  |
| H | -0.0080557 | 2.3656245  | 6.0638461  |
| H | -1.2039301 | 1.4105311  | 5.1184955  |
| H | 0.4870078  | 1.5306249  | 4.5484762  |
| C | -0.6059304 | 0.0790384  | 7.5516106  |
| H | 1.2908913  | 0.2660289  | 6.5508079  |
| H | -0.4227920 | 0.9573638  | 8.2040014  |
| H | -0.3513554 | -0.8355223 | 8.1242739  |
| H | -1.6947003 | 0.0545559  | 7.3390859  |
| C | 2.4391296  | -3.1383465 | 3.1252210  |
| C | 3.5562867  | -2.1110691 | 2.9041629  |
| H | 4.4351502  | -2.5783358 | 2.4173768  |
| H | 3.9068974  | -1.6411366 | 3.8448098  |
| H | 3.2279906  | -1.2938554 | 2.2263261  |
| C | 2.9822092  | -4.2994047 | 3.9855165  |
| H | 2.1689061  | -3.5455790 | 2.1290079  |
| H | 3.8609293  | -4.7770472 | 3.5045103  |
| H | 2.2136691  | -5.0792687 | 4.1510555  |
| H | 3.2942761  | -3.9314002 | 4.9852445  |
| H | -0.5422809 | 4.7370197  | -3.1428970 |
| H | 1.4617747  | -0.0885014 | -5.8268767 |
| H | -5.7406208 | 1.4897189  | -3.0998360 |
| C | 0.2877824  | 3.9965560  | -3.1693255 |
| H | 2.6415872  | -1.9618948 | -3.5361480 |
| H | 1.4477294  | 5.1282943  | -1.6710736 |
| H | -5.0282998 | 1.6121994  | -0.6466021 |
| C | -0.3503606 | 2.6185817  | -3.2625037 |
| C | 0.9103935  | -0.9931772 | -5.4946578 |
| C | 1.0455127  | 4.1072171  | -1.8315485 |
| H | 1.8937145  | 3.3889132  | -1.7952451 |
| C | 0.3996536  | 1.4811024  | -3.6073254 |
| C | -4.6814781 | 1.6101785  | -3.4080390 |
| H | 0.6443412  | 4.2465702  | -5.3249535 |
| C | -1.6890419 | 2.4353932  | -2.8847825 |
| C | 1.1863677  | 4.3504880  | -4.3635884 |
| H | 1.5463210  | 5.3974836  | -4.2864528 |
| H | -2.2893507 | 3.3228976  | -2.6247379 |
| C | 2.0741541  | -1.0583287 | -3.2324055 |
| H | 1.4882012  | -1.8811212 | -5.8255361 |
| H | -0.0660060 | -1.0012642 | -6.0202668 |
| C | -0.1387429 | 0.1862054  | -3.5344954 |
| C | -3.9730639 | 1.7320927  | -0.9654769 |
| C | -2.2772985 | 1.1608290  | -2.7833583 |
| H | -4.5420060 | 1.0862783  | -4.3759918 |
| H | -4.5045479 | 2.6913311  | -3.5885740 |
| C | 0.7230326  | -0.9998680 | -3.9649569 |
| C | -1.4820979 | 0.0223894  | -3.0927157 |
| C | -3.7325015 | 1.0601739  | -2.3269164 |
| H | 1.9352120  | -1.0986501 | -2.1354288 |
| H | -3.3450397 | 1.2713465  | -0.1798327 |
| H | 2.7126858  | -0.1797348 | -3.4588295 |
| H | 0.3751634  | 3.8646529  | -0.9824044 |

|   |            |            |            |
|---|------------|------------|------------|
| H | -3.7584974 | 2.8211689  | -0.9892945 |
| H | 2.0827143  | 3.6967416  | -4.4102922 |
| H | 0.1706098  | -1.9283891 | -3.7134279 |
| H | -3.9730161 | -0.0130691 | -2.1945435 |
| H | 1.4473651  | 1.5996648  | -3.9249065 |
| H | -1.3875934 | 4.5099396  | 2.1626832  |
| H | -0.7224853 | 3.4849005  | 3.4582763  |
| H | 0.8513362  | 6.1308407  | 1.4198191  |
| C | 5.9757846  | 9.6506233  | -2.9821639 |
| C | 5.1191867  | 8.7466940  | -2.3472586 |
| C | 4.7753909  | 7.5348004  | -2.9878243 |
| C | 5.2957673  | 7.2403209  | -4.2661752 |
| C | 6.1541791  | 8.1483171  | -4.9005428 |
| C | 6.4930202  | 9.3513929  | -4.2579190 |
| H | 6.2471709  | 10.5958219 | -2.4877522 |
| H | 4.6967278  | 8.9484798  | -1.3510465 |
| C | 3.8707498  | 6.5710919  | -2.3269934 |
| H | 5.0206344  | 6.2925580  | -4.7575736 |
| H | 6.5617641  | 7.9211101  | -5.8971197 |
| H | 7.1676716  | 10.0653378 | -4.7552909 |
| O | 3.3637085  | 6.7334165  | -1.2216147 |
| H | 3.6609191  | 5.6357978  | -2.9236831 |

|   |            |            |            |
|---|------------|------------|------------|
| C | -1.0413763 | 4.0840721  | -0.2339873 |
| C | -0.6752709 | 3.5899279  | 1.0530803  |
| C | -2.4007763 | 4.0709311  | -0.5945642 |
| C | -1.6657654 | 3.0653180  | 1.9249997  |
| C | -3.0102328 | 3.0731329  | 1.5097242  |
| C | -3.4034244 | 3.5819359  | 0.2598943  |
| C | -1.3185176 | 2.5394659  | 3.3156807  |
| H | -3.7768289 | 2.6784247  | 2.1952392  |
| C | -1.7404129 | 1.0728185  | 3.4994226  |
| H | -2.8403096 | 0.9467990  | 3.4240379  |
| H | -1.4316022 | 0.6991675  | 4.4977381  |
| H | -1.2848227 | 0.4163369  | 2.7345057  |
| C | -1.9167061 | 3.4412049  | 4.4117354  |
| H | -0.2154485 | 2.5843475  | 3.4258422  |
| H | -3.0263219 | 3.4384115  | 4.3739884  |
| H | -1.5788365 | 4.4918984  | 4.3014879  |
| H | -1.6153639 | 3.0851811  | 5.4188190  |
| C | -4.8691514 | 3.6649053  | -0.1457792 |
| C | -5.6085165 | 2.3255594  | 0.0007206  |
| H | -6.6550205 | 2.4179506  | -0.3571455 |
| H | -5.6487854 | 1.9921596  | 1.0585840  |
| H | -5.1104363 | 1.5310620  | -0.5901716 |
| C | -5.5756033 | 4.7914754  | 0.6339753  |
| H | -4.8856832 | 3.9382206  | -1.2235802 |
| H | -6.6279994 | 4.9093997  | 0.3010617  |
| H | -5.0589191 | 5.7628637  | 0.4938470  |
| H | -5.5866868 | 4.5732587  | 1.7228484  |
| C | -0.0228652 | 4.6537159  | -1.2260273 |
| C | -0.1261467 | 4.0377885  | -2.6321972 |
| H | 0.6366543  | 4.4831050  | -3.3037292 |
| H | -1.1189016 | 4.2004310  | -3.0984442 |
| H | 0.0642648  | 2.9470348  | -2.5975008 |
| C | -0.1365476 | 6.1889777  | -1.3015755 |
| H | 0.9907417  | 4.4119690  | -0.8485350 |
| H | 0.6382119  | 6.6101336  | -1.9755340 |
| H | -0.0138749 | 6.6572024  | -0.3044429 |
| H | -1.1297304 | 6.4944382  | -1.6923286 |
| H | 1.5804103  | -5.4748605 | -3.1536900 |
| H | 5.5198494  | -1.1252293 | -4.2829169 |
| C | 4.2920652  | -5.1904495 | 2.4040004  |
| C | 2.2613904  | -4.7968463 | -3.7151763 |
| H | 3.7256226  | 1.4933594  | -3.7627157 |
| H | 0.9504668  | -4.9048576 | -5.4637770 |
| H | 1.9010366  | -4.3777709 | 2.6564780  |
| C | 2.8093546  | -3.8018548 | -2.6986477 |
| C | 5.6638964  | -0.5000724 | -3.3767477 |
| C | 1.4350945  | -4.1352346 | -4.8289745 |
| H | 2.0662910  | -3.5122466 | -5.4961663 |
| C | 3.2853680  | -2.5339263 | -3.0713571 |
| C | 4.2646054  | -4.9037044 | 1.3324987  |
| H | 3.9570394  | -6.1812647 | -3.4975056 |
| C | 2.8684600  | -4.1457942 | -1.3373007 |
| C | 3.3967374  | -5.6594164 | -4.2992065 |
| H | 2.9984007  | -6.4249502 | -4.9973110 |
| H | 2.5027167  | -5.1398865 | -1.0308893 |
| C | 3.3229559  | 0.4934213  | -3.4998558 |
| H | 6.0994770  | 0.4682996  | -3.6997969 |
| H | 6.4054680  | -1.0121197 | -2.7303159 |
| C | 3.7764305  | -1.6114289 | -2.1301601 |
| C | 1.8832768  | -4.0446059 | 1.5986646  |
| C | 3.3331064  | -3.2579315 | -0.3495198 |
| H | 5.2978099  | -4.6501878 | 1.0178559  |
| H | 3.9513193  | -5.7975580 | 0.7533509  |
| C | 4.3322849  | -0.2799699 | -2.6327485 |
| C | 3.7848148  | -1.9667678 | -0.7517432 |
| C | 3.3058375  | -3.7196458 | 1.1091543  |
| H | 2.3664812  | 0.6399248  | -2.9611856 |
| H | 1.2467457  | -3.1383713 | 1.5458730  |
| H | 3.1094830  | -0.0351661 | -4.4525364 |
| H | 0.6401057  | -3.4841349 | -4.4120457 |
| H | 1.4061422  | -4.8488215 | 1.0014169  |

### TS-7-d-mi; COSMO

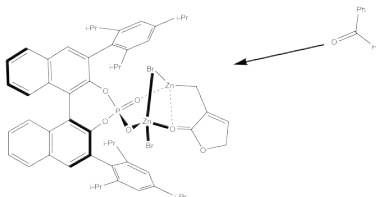

Energy (Hartree) = -11969.9929571

|   |           |            |            |
|---|-----------|------------|------------|
| C | 1.5522419 | 2.4314738  | 1.4762472  |
| C | 2.9490400 | 2.4203578  | 1.5678516  |
| C | 3.6329702 | 3.6934889  | 1.6325287  |
| C | 5.0526103 | 3.8261024  | 1.5523618  |
| C | 2.8487685 | 4.8995649  | 1.7533043  |
| C | 3.5099681 | 6.1578504  | 1.8843337  |
| C | 1.4307572 | 4.8274346  | 1.6586940  |
| H | 0.8484220 | 5.7609123  | 1.6887595  |
| C | 0.7681860 | 3.6253403  | 1.4423629  |
| C | 4.2020949 | -0.9805216 | 0.2907763  |
| C | 5.2835162 | -1.2009663 | 1.1377104  |
| H | 5.9225962 | -2.0828256 | 0.9746735  |
| C | 5.5479470 | -0.3588928 | 2.2551340  |
| C | 6.5898449 | -0.6663865 | 3.1818647  |
| C | 4.7173231 | 0.7986416  | 2.4852709  |
| C | 4.9259269 | 1.5518993  | 3.6798125  |
| C | 3.6951657 | 1.1321099  | 1.5211581  |
| C | 3.4314159 | 0.2057689  | 0.5028492  |
| O | 0.8656763 | 1.2198104  | 1.4489579  |
| O | 2.4118624 | 0.4603435  | -0.4095722 |
| P | 0.8438123 | 0.3373186  | 0.0679445  |
| O | 0.0723604 | 1.0967576  | -1.0329879 |
| O | 0.4362687 | -1.0733491 | 0.4553897  |
| C | 4.8932863 | 6.2436229  | 1.8504173  |
| C | 5.6660996 | 5.0672144  | 1.6601336  |
| H | 2.8934274 | 7.0641819  | 1.9920092  |
| H | 5.3913160 | 7.2203337  | 1.9472884  |
| H | 5.6687587 | 2.9308466  | 1.3951002  |
| H | 6.7623829 | 5.1386234  | 1.5918513  |
| C | 5.9319633 | 1.2127726  | 4.5742619  |
| C | 6.7849757 | 0.1059015  | 4.3171625  |
| H | 4.2685216 | 2.4057113  | 3.8949356  |
| H | 6.0650885 | 1.8039530  | 5.4931280  |
| H | 7.5856542 | -0.1470759 | 5.0287932  |
| H | 7.2244664 | -1.5450463 | 2.9861796  |

|    |             |            |            |   |            |            |            |
|----|-------------|------------|------------|---|------------|------------|------------|
| H  | 4.1193300   | -5.0287851 | -4.8585580 | O | 0.4418695  | -1.0816887 | 0.4360585  |
| H  | 4.5591988   | 0.3506410  | -1.7501243 | C | 4.8906467  | 6.2427415  | 1.8516307  |
| H  | 3.6668799   | -2.8841144 | 1.7389516  | C | 5.6637117  | 5.0671880  | 1.6616313  |
| H  | 3.2730978   | -2.2452718 | -4.1334663 | H | 2.8908775  | 7.0619423  | 1.9925748  |
| Zn | -1.3685685  | 0.7445037  | -2.2197398 | H | 5.3879766  | 7.2197828  | 1.9484577  |
| Br | -3.2375624  | 1.5639802  | -3.2343475 | H | 5.6670958  | 2.9308463  | 1.3962554  |
| C  | -10.6086237 | -5.4380676 | 1.5465278  | H | 6.7599386  | 5.1389660  | 1.5935027  |
| C  | -9.6734327  | -4.6466945 | 0.8714690  | C | 5.9316147  | 1.2133929  | 4.5734615  |
| C  | -9.6568942  | -3.2481848 | 1.0710711  | C | 6.7845053  | 0.1069533  | 4.3172969  |
| C  | -10.5842260 | -2.6529776 | 1.9518498  | H | 4.2682458  | 2.4057514  | 3.8920657  |
| C  | -11.5242969 | -3.4470868 | 2.6248877  | H | 6.0641191  | 1.8049147  | 5.4921190  |
| C  | -11.5353917 | -4.8381893 | 2.4219928  | H | 7.5847549  | -0.1460804 | 5.0292931  |
| H  | -10.6221931 | -6.5284146 | 1.3951715  | H | 7.2244404  | -1.5439996 | 2.9872357  |
| C  | -8.6695579  | -2.4061627 | 0.3487428  | C | -1.0415290 | 4.0832499  | -0.2351982 |
| H  | -10.5641660 | -1.5610761 | 2.1034182  | C | -0.6758171 | 3.5878875  | 1.0513950  |
| H  | -12.2510302 | -2.9842003 | 3.3098487  | C | -2.4008336 | 4.0712444  | -0.5954391 |
| H  | -12.2723130 | -5.4627225 | 2.9506873  | C | -1.6661953 | 3.0645601  | 1.9239344  |
| O  | -7.8533174  | -2.8284011 | -0.4572318 | C | -3.0104338 | 3.0745788  | 1.5088300  |
| C  | -2.4583342  | -4.2674696 | -3.0323438 | C | -3.4036502 | 3.5839323  | 0.2595196  |
| C  | -1.5158064  | -3.5611172 | -2.3354362 | C | -1.3190284 | 2.5369034  | 3.3139116  |
| C  | -1.6006806  | -2.1906539 | -2.8684804 | H | -3.7769136 | 2.6802887  | 2.1945930  |
| O  | -2.4818863  | -2.0862800 | -3.8633302 | C | -1.7405187 | 1.0700124  | 3.4958678  |
| C  | -3.1177379  | -3.3769585 | -4.0315818 | H | -2.8401175 | 0.9422884  | 3.4205521  |
| O  | -0.9621509  | -1.2084553 | -2.4332353 | H | -1.4321799 | 0.6946229  | 4.4933686  |
| C  | -0.5991713  | -3.8568984 | -1.2300647 | H | -1.2837641 | 0.4127133  | 2.7325925  |
| H  | -2.9758024  | -3.6954771 | -5.0875779 | C | -1.9169042 | 3.4377194  | 4.4108941  |
| H  | -4.2070355  | -3.2277754 | -3.8640683 | H | -0.2159211 | 2.5821906  | 3.4240626  |
| Zn | -0.9317591  | -2.5615650 | 0.2687639  | H | -3.0264508 | 3.4353470  | 4.3740920  |
| Br | -2.6743666  | -2.1451037 | 1.7567305  | H | -1.5799252 | 4.4887273  | 4.3022932  |
| H  | 0.4406768   | -3.5862287 | -1.5062952 | H | -1.6159875 | 3.0803503  | 5.4175446  |
| H  | -0.6404516  | -4.9149148 | -0.9115240 | C | -4.8694220 | 3.6694009  | -0.1453151 |
| H  | -8.9365843  | -5.0830241 | 0.1795309  | C | -5.6106397 | 2.3311711  | 0.0001391  |
| H  | -2.7252696  | -5.3244952 | -2.9003436 | H | -6.6572739 | 2.4252935  | -0.3566362 |
| H  | -8.7256210  | -1.3043005 | 0.5997139  | H | -5.6507623 | 1.9959055  | 1.0573591  |
| H  | -2.6982679  | 4.4537887  | -1.5835129 | H | -5.1156420 | 1.5362154  | -0.5923248 |
|    |             |            |            | C | -5.5733470 | 4.7969269  | 0.6351546  |
|    |             |            |            | H | -4.8859521 | 3.9428671  | -1.2231117 |
|    |             |            |            | H | -6.6257158 | 4.9173879  | 0.3031438  |
|    |             |            |            | H | -5.0547124 | 5.7672489  | 0.4963673  |
|    |             |            |            | H | -5.5844369 | 4.5788381  | 1.7239297  |
|    |             |            |            | C | -0.0227002 | 4.6531263  | -1.2269730 |
|    |             |            |            | C | -0.1260958 | 4.0376284  | -2.6332839 |
|    |             |            |            | H | 0.6366206  | 4.4824323  | -3.3051695 |
|    |             |            |            | H | -1.1185852 | 4.1992294  | -3.1002650 |
|    |             |            |            | H | 0.0641328  | 2.9470350  | -2.5985815 |
|    |             |            |            | C | -0.1356260 | 6.1883422  | -1.3025783 |
|    |             |            |            | H | 0.9909304  | 4.4113209  | -0.8495192 |
|    |             |            |            | H | 0.6390371  | 6.6096821  | -1.9764951 |
|    |             |            |            | H | -0.0128690 | 6.6568738  | -0.3057388 |
|    |             |            |            | H | -1.1286290 | 6.4950715  | -1.6923532 |
|    |             |            |            | H | 1.5777727  | -5.4716213 | -3.1541422 |
|    |             |            |            | H | 5.5216969  | -1.1256378 | -4.2824878 |
|    |             |            |            | H | 4.2943338  | -5.1899000 | 2.4028922  |
|    |             |            |            | C | 2.2607705  | -4.7950286 | -3.7152196 |
|    |             |            |            | H | 3.7262601  | 1.4943499  | -3.7624654 |
|    |             |            |            | H | 0.9505708  | -4.9026541 | -5.4650569 |
|    |             |            |            | H | 1.9020800  | -4.3779116 | 2.6566599  |
|    |             |            |            | C | 2.8087302  | -3.8000878 | -2.6985624 |
|    |             |            |            | C | 5.6648473  | -0.5000302 | -3.3766021 |
|    |             |            |            | C | 1.4354388  | -4.1335369 | -4.8297518 |
|    |             |            |            | H | 2.0671264  | -3.5117632 | -5.4974856 |
|    |             |            |            | C | 3.2850464  | -2.5326233 | -3.0709487 |
|    |             |            |            | C | 4.2656502  | -4.9022512 | 1.3317087  |
|    |             |            |            | H | 3.9552144  | -6.1800891 | -3.4957844 |
|    |             |            |            | C | 2.8681068  | -4.1439437 | -1.3375513 |
|    |             |            |            | C | 3.3954031  | -5.6589937 | -4.2980260 |
|    |             |            |            | H | 2.9982390  | -6.4247647 | -4.9965426 |
|    |             |            |            | H | 2.5017644  | -5.1378112 | -1.0309244 |
|    |             |            |            | C | 3.3240954  | 0.4942846  | -3.4998677 |
|    |             |            |            | H | 6.1009158  | 0.4678376  | -3.7002373 |
|    |             |            |            | H | 6.4059631  | -1.0123528 | -2.7302398 |

### TS-7-d-mi

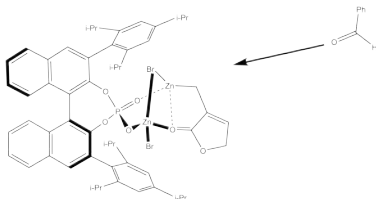

Energy (Hartree)= -11969.97612107  
number of imaginary frequencies: 5

|   |           |            |            |
|---|-----------|------------|------------|
| C | 1.5518665 | 2.4278020  | 1.4734462  |
| C | 2.9487716 | 2.4189879  | 1.5669528  |
| C | 3.6317676 | 3.6925312  | 1.6329052  |
| C | 5.0511430 | 3.8261542  | 1.5533307  |
| C | 2.8470820 | 4.8979178  | 1.7539143  |
| C | 3.5079106 | 6.1559128  | 1.8852334  |
| C | 1.4295689 | 4.8236176  | 1.6589853  |
| H | 0.8449482 | 5.7556776  | 1.6894378  |
| C | 0.7674658 | 3.6216954  | 1.4407106  |
| C | 4.2045565 | -0.9802498 | 0.2900665  |
| C | 5.2850539 | -1.2005503 | 1.1377976  |
| H | 5.9230595 | -2.0831765 | 0.9747662  |
| C | 5.5490605 | -0.3586088 | 2.2550894  |
| C | 6.5899501 | -0.6651691 | 3.1824740  |
| C | 4.7181763 | 0.7986195  | 2.4846123  |
| C | 4.9261081 | 1.5519521  | 3.6789140  |
| C | 3.6968055 | 1.1321401  | 1.5200021  |
| C | 3.4344798 | 0.2065269  | 0.5010077  |
| O | 0.8662372 | 1.2158001  | 1.4435410  |
| O | 2.4167075 | 0.4612332  | -0.4125693 |
| P | 0.8485149 | 0.3323235  | 0.0642492  |
| O | 0.0793559 | 1.0934607  | -1.0397176 |

|    |             |            |            |    |            |            |            |
|----|-------------|------------|------------|----|------------|------------|------------|
| C  | 3.7774696   | -1.6108228 | -2.1302420 | H  | 3.3309600  | 2.8093321  | -0.8071715 |
| C  | 1.8842211   | -4.0430245 | 1.5994612  | H  | 4.1992374  | 3.4141351  | 0.6438570  |
| C  | 3.3337789   | -3.2569178 | -0.3498767 | Zn | -0.7812931 | 0.9947559  | 2.4916919  |
| H  | 5.2984753   | -4.6493735 | 1.0157202  | Br | -1.6148780 | 0.2009136  | 4.5360874  |
| H  | 3.9533725   | -5.7964723 | 0.7526968  | C  | -1.3757339 | -4.0014745 | 0.4437065  |
| C  | 4.3332647   | -0.2794953 | -2.6331210 | C  | -2.2202208 | -4.1989817 | -0.6512032 |
| C  | 3.7866775   | -1.9664215 | -0.7521207 | C  | -2.2953938 | -5.5304582 | -1.2140335 |
| C  | 3.3064486   | -3.7186173 | 1.1088683  | C  | -3.0012376 | -5.8299486 | -2.4185676 |
| H  | 2.3678066   | 0.6409958  | -2.9613076 | C  | -1.6062257 | -6.6126822 | -0.5494565 |
| H  | 1.2480123   | -3.1366758 | 1.5487697  | C  | -1.7318675 | -7.9410978 | -1.0559233 |
| H  | 3.1100184   | -0.0331130 | -4.4530416 | C  | -0.7516070 | -6.3317474 | 0.5555918  |
| H  | 0.6416889   | -3.4806961 | -4.4135836 | H  | -0.1800157 | -7.1552380 | 1.0101425  |
| H  | 1.4059639   | -4.8467485 | 1.0022962  | C  | -0.5755660 | -5.0370938 | 1.0196712  |
| H  | 4.1195417   | -5.0293200 | -4.8560822 | C  | -2.8217292 | -0.7997324 | -2.3289552 |
| H  | 4.5600555   | 0.3510255  | -1.7504792 | C  | -4.1478598 | -0.9326987 | -2.7255969 |
| H  | 3.6675340   | -2.8827160 | 1.7381879  | H  | -4.6058536 | -0.1446890 | -3.3418059 |
| H  | 3.2718631   | -2.2429464 | -4.1326922 | C  | -4.9533083 | -2.0299957 | -2.3076921 |
| Zn | -1.3949349  | 0.7428883  | -2.1770038 | C  | -6.3463612 | -2.0860629 | -2.6154256 |
| Br | -3.2251235  | 1.5529625  | -3.2488011 | C  | -4.3613495 | -3.0867214 | -1.5245966 |
| C  | -10.6081764 | -5.4373116 | 1.5481877  | C  | -5.2135287 | -4.1170573 | -1.0246787 |
| C  | -9.6730684  | -4.6449543 | 0.8748624  | C  | -2.9455676 | -3.0439790 | -1.2466279 |
| C  | -9.6584875  | -3.2471426 | 1.0735975  | C  | -2.2478476 | -1.8737484 | -1.5796629 |
| C  | -10.5878083 | -2.6539417 | 1.9520783  | O  | -1.3196163 | -2.7506146 | 1.0482296  |
| C  | -11.5281921 | -3.4485248 | 2.6235713  | O  | -0.9021707 | -1.7485495 | -1.2422071 |
| C  | -11.5372656 | -4.8391188 | 2.4213349  | P  | -0.4938368 | -1.5144222 | 0.3339271  |
| H  | -10.6198348 | -6.5277973 | 1.3973988  | O  | 1.0262489  | -1.7531581 | 0.3543723  |
| C  | -8.6680642  | -2.4070298 | 0.3483287  | O  | -1.0633977 | -0.2255981 | 0.9114793  |
| H  | -10.5688131 | -1.5618214 | 2.1031787  | C  | -2.4693180 | -8.2019531 | -2.2008358 |
| H  | -12.2567916 | -2.9864636 | 3.3071344  | C  | -3.0886150 | -7.1305834 | -2.8972450 |
| H  | -12.2742895 | -5.4644147 | 2.9489722  | H  | -1.2142934 | -8.7554992 | -0.5249101 |
| O  | -7.8567123  | -2.8321653 | -0.4570297 | H  | -2.5575213 | -9.2307642 | -2.5817982 |
| C  | -2.4596765  | -4.2665255 | -3.0268680 | H  | -3.4798208 | -5.0151944 | -2.9777848 |
| C  | -1.5126553  | -3.5612258 | -2.3340536 | H  | -3.6406506 | -7.3302875 | -3.8283199 |
| C  | -1.5927382  | -2.1908836 | -2.8749579 | C  | -6.5699676 | -4.1294096 | -1.3194568 |
| O  | -2.4758293  | -2.0905648 | -3.8709260 | C  | -7.1411659 | -3.1167159 | -2.1361749 |
| C  | -3.1168180  | -3.3767027 | -4.0300145 | H  | -4.7860593 | -4.9010334 | -0.3839595 |
| O  | -0.9535427  | -1.2074072 | -2.4494826 | H  | -7.2086617 | -4.9271794 | -0.9105303 |
| C  | -0.6001053  | -3.8545625 | -1.2277962 | H  | -8.2162880 | -3.1423713 | -2.3704916 |
| H  | -2.9773106  | -3.7008714 | -5.0853248 | H  | -6.7827058 | -1.2794406 | -3.2253257 |
| H  | -4.2057487  | -3.2205093 | -3.8630059 | C  | 1.8118395  | -4.4644877 | 1.5129115  |
| Zn | -0.9471996  | -2.5623102 | 0.2793266  | C  | 0.4815731  | -4.6087517 | 1.9832270  |
| Br | -2.6675568  | -2.1679766 | 1.7743832  | C  | 2.7585421  | -3.8461457 | 2.3686239  |
| H  | 0.4400002   | -3.5785431 | -1.4969716 | C  | 0.1237300  | -4.1999794 | 3.2974644  |
| H  | -0.6415484  | -4.9125932 | -0.9088921 | C  | 1.0817897  | -3.5529244 | 4.0963270  |
| H  | -8.9323591  | -5.0760357 | 0.1837991  | C  | 2.4086401  | -3.3669639 | 3.6590887  |
| H  | -2.7307000  | -5.3214182 | -2.8873296 | H  | 3.8197400  | -3.8297570 | 2.0747867  |
| H  | -8.7218849  | -1.3033818 | 0.5998669  | C  | -1.2570903 | -4.5252316 | 3.8560794  |
| H  | -2.6985800  | 4.4543679  | -1.5842023 | H  | 0.7963884  | -3.2181148 | 5.1054524  |

### TS-7-j-ma; COSMO

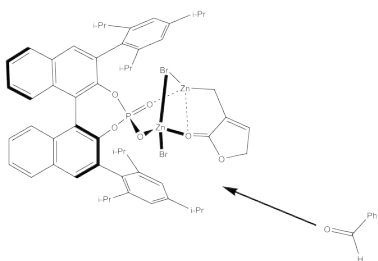

Energy (Hartree) = -11969.99664762

|    |           |            |           |
|----|-----------|------------|-----------|
| Zn | 2.5636764 | -1.4943832 | 1.5264064 |
| Br | 4.8838695 | -1.2431614 | 1.3335646 |
| C  | 2.0241398 | 3.5786263  | 0.7887120 |
| C  | 1.3376422 | 2.7240842  | 1.6040329 |
| C  | 2.1191710 | 1.4688208  | 1.5923372 |
| O  | 3.2279319 | 1.5871068  | 0.8593427 |
| C  | 3.2658661 | 2.9177068  | 0.2972901 |
| O  | 1.7946548 | 0.3864679  | 2.1357738 |
| C  | 0.0666572 | 2.8139839  | 2.3401891 |

|    |            |            |            |
|----|------------|------------|------------|
| H  | 3.3309600  | 2.8093321  | -0.8071715 |
| H  | 4.1992374  | 3.4141351  | 0.6438570  |
| Zn | -0.7812931 | 0.9947559  | 2.4916919  |
| Br | -1.6148780 | 0.2009136  | 4.5360874  |
| C  | -1.3757339 | -4.0014745 | 0.4437065  |
| C  | -2.2202208 | -4.1989817 | -0.6512032 |
| C  | -2.2953938 | -5.5304582 | -1.2140335 |
| C  | -3.0012376 | -5.8299486 | -2.4185676 |
| C  | -1.6062257 | -6.6126822 | -0.5494565 |
| C  | -1.7318675 | -7.9410978 | -1.0559233 |
| C  | -0.7516070 | -6.3317474 | 0.5555918  |
| H  | -0.1800157 | -7.1552380 | 1.0101425  |
| C  | -0.5755660 | -5.0370938 | 1.0196712  |
| C  | -2.8217292 | -0.7997324 | -2.3289552 |
| C  | -4.1478598 | -0.9326987 | -2.7255969 |
| H  | -4.6058536 | -0.1446890 | -3.3418059 |
| C  | -4.9533083 | -2.0299957 | -2.3076921 |
| C  | -6.3463612 | -2.0860629 | -2.6154256 |
| C  | -4.3613495 | -3.0867214 | -1.5245966 |
| C  | -5.2135287 | -4.1170573 | -1.0246787 |
| C  | -2.9455676 | -3.0439790 | -1.2466279 |
| C  | -2.2478476 | -1.8737484 | -1.5796629 |
| O  | -1.3196163 | -2.7506146 | 1.0482296  |
| O  | -0.9021707 | -1.7485495 | -1.2422071 |
| P  | -0.4938368 | -1.5144222 | 0.3339271  |
| O  | 1.0262489  | -1.7531581 | 0.3543723  |
| O  | -1.0633977 | -0.2255981 | 0.9114793  |
| C  | -2.4693180 | -8.2019531 | -2.2008358 |
| C  | -3.0886150 | -7.1305834 | -2.8972450 |
| H  | -1.2142934 | -8.7554992 | -0.5249101 |
| H  | -2.5575213 | -9.2307642 | -2.5817982 |
| H  | -3.4798208 | -5.0151944 | -2.9777848 |
| H  | -3.6406506 | -7.3302875 | -3.8283199 |
| C  | -6.5699676 | -4.1294096 | -1.3194568 |
| C  | -7.1411659 | -3.1167159 | -2.1361749 |
| H  | -4.7860593 | -4.9010334 | -0.3839595 |
| H  | -7.2086617 | -4.9271794 | -0.9105303 |
| H  | -8.2162880 | -3.1423713 | -2.3704916 |
| H  | -6.7827058 | -1.2794406 | -3.2253257 |
| C  | 1.8118395  | -4.4644877 | 1.5129115  |
| C  | 0.4815731  | -4.6087517 | 1.9832270  |
| C  | 2.7585421  | -3.8461457 | 2.3686239  |
| C  | 0.1237300  | -4.1999794 | 3.2974644  |
| C  | 1.0817897  | -3.5529244 | 4.0963270  |
| C  | 2.4086401  | -3.3669639 | 3.6590887  |
| H  | 3.8197400  | -3.8297570 | 2.0747867  |
| C  | -1.2570903 | -4.5252316 | 3.8560794  |
| H  | 0.7963884  | -3.2181148 | 5.1054524  |
| C  | -2.0065640 | -3.2950347 | 4.3771666  |
| H  | -1.4900017 | -2.8253430 | 5.2384758  |
| H  | -3.0254558 | -3.5770698 | 4.7131031  |
| H  | -2.0990278 | -2.5171902 | 3.5970681  |
| C  | -1.1388368 | -5.6192830 | 4.9359865  |
| H  | -1.8527530 | -4.9531066 | 3.0232033  |
| H  | -0.5508071 | -5.2604752 | 5.8068054  |
| H  | -0.6425308 | -6.5304301 | 4.5441005  |
| H  | -2.1452157 | -5.9051953 | 5.3052484  |
| C  | 3.4785055  | -2.8005450 | 4.5846534  |
| C  | 3.1250875  | -1.3962336 | 5.0996522  |
| H  | 3.9178729  | -1.0212722 | 5.7782488  |
| H  | 2.1652283  | -1.3841672 | 5.6562307  |
| H  | 3.0329624  | -0.6746032 | 4.2616962  |
| C  | 3.7576560  | -3.7851809 | 5.7367810  |
| H  | 4.4079465  | -2.7099718 | 3.9819674  |
| H  | 4.5978724  | -3.4229439 | 6.3638512  |
| H  | 4.0250749  | -4.7902622 | 5.3518655  |
| H  | 2.8700328  | -3.9002602 | 6.3932507  |
| C  | 2.2523141  | -5.0084043 | 0.1553166  |
| C  | 3.1784661  | -4.0751549 | -0.6384692 |
| H  | 3.4223828  | -4.5349590 | -1.6177325 |
| H  | 4.1385028  | -3.8765839 | -0.1202422 |

|   |            |            |            |
|---|------------|------------|------------|
| H | 2.6868447  | -3.1028885 | -0.8398992 |
| C | 2.8980176  | -6.3969720 | 0.3421656  |
| H | 1.3370697  | -5.1470811 | -0.4541353 |
| H | 3.1568353  | -6.8403528 | -0.6413145 |
| H | 2.2190928  | -7.0983020 | 0.8672453  |
| H | 3.8310046  | -6.3233011 | 0.9392012  |
| H | 0.1657545  | 4.7015390  | -2.5930722 |
| H | -0.1128760 | -0.0418332 | -6.1946363 |
| H | -5.6095424 | 2.5332878  | -1.0937927 |
| C | 0.3360637  | 4.0126262  | -3.4506675 |
| H | 1.1734901  | -2.3450136 | -4.3796471 |
| H | 2.3863764  | 4.7500424  | -3.6631740 |
| H | -4.0265695 | 2.4978302  | 0.9545975  |
| C | -0.4504728 | 2.7421475  | -3.1498515 |
| C | -0.7485497 | -0.8303629 | -5.7397873 |
| C | 1.8500450  | 3.7838500  | -3.5691602 |
| H | 2.1071774  | 3.1797239  | -4.4637266 |
| C | -0.1414194 | 1.5107821  | -3.7521244 |
| C | -4.7311943 | 2.4719867  | -1.7692843 |
| H | -1.3023584 | 4.9156608  | -4.6100520 |
| C | -1.5574642 | 2.7889093  | -2.2857803 |
| C | -0.2196570 | 4.7010272  | -4.7133272 |
| C | 0.3057353  | 5.6584357  | -4.9120925 |
| H | -1.8071115 | 3.7477489  | -1.8031778 |
| C | 0.9451734  | -1.3643348 | -3.9129792 |
| H | -0.5123994 | -1.7877105 | -6.2493150 |
| H | -1.8058803 | -0.5765003 | -5.9579841 |
| C | -0.8944208 | 0.3476857  | -3.5074659 |
| C | -3.1866569 | 2.5532635  | 0.2325857  |
| C | -2.3480942 | 1.6588627  | -2.0088135 |
| H | -5.0382456 | 1.9178693  | -2.6786962 |
| H | -4.4709835 | 3.5044629  | -2.0842984 |
| C | -0.5031043 | -0.9445187 | -4.2231903 |
| C | -2.0123907 | 0.4220514  | -2.6311151 |
| C | -3.5383778 | 1.8066729  | -1.0601796 |
| H | 1.1046503  | -1.4575656 | -2.8209181 |
| H | -2.2884578 | 2.1179330  | 0.7109819  |
| H | 1.6778462  | -0.6310544 | -4.3103766 |
| H | 2.2490204  | 3.2507705  | -2.6822815 |
| H | -2.9788818 | 3.6283125  | 0.0509927  |
| H | -0.0902371 | 4.0485489  | -5.6024479 |
| H | -1.1651384 | -1.7529850 | -3.8528074 |
| H | -3.8502066 | 0.7794799  | -0.7619695 |
| H | 0.7168200  | 1.4463459  | -4.4388105 |
| H | 0.2649091  | 2.9992587  | 3.4200704  |
| H | -0.5694094 | 3.6391188  | 1.9669128  |
| H | 1.7455521  | 4.6100255  | 0.5324111  |
| C | 2.9451458  | 15.0490692 | 1.0489752  |
| C | 3.3109334  | 13.7274932 | 1.3253793  |
| C | 4.6733142  | 13.3941977 | 1.4961733  |
| C | 5.6613841  | 14.3953282 | 1.3879268  |
| C | 5.2933037  | 15.7196248 | 1.1099018  |
| C | 3.9360872  | 16.0449598 | 0.9407717  |
| H | 1.8847195  | 15.3129445 | 0.9158350  |
| H | 2.5616195  | 12.9259438 | 1.4161743  |
| C | 5.0680661  | 11.9935215 | 1.7873872  |
| H | 6.7220554  | 14.1262950 | 1.5231332  |
| H | 6.0629405  | 16.5017817 | 1.0242710  |
| H | 3.6456745  | 17.0844452 | 0.7225234  |
| O | 4.2902191  | 11.0561046 | 1.8922366  |
| H | 6.1827137  | 11.8423016 | 1.9106413  |

number of imaginary frequencies: 5

|    |            |            |            |
|----|------------|------------|------------|
| Zn | 2.5682506  | -1.4887632 | 1.5158470  |
| Br | 4.8805034  | -1.2461725 | 1.3428262  |
| C  | 2.0225169  | 3.5896203  | 0.7991920  |
| C  | 1.3315563  | 2.7322935  | 1.6082328  |
| C  | 2.1170083  | 1.4768154  | 1.5986155  |
| O  | 3.2316141  | 1.6012396  | 0.8719576  |
| C  | 3.2688642  | 2.9303303  | 0.3127156  |
| O  | 1.7935358  | 0.3940805  | 2.1352432  |
| C  | 0.0570774  | 2.8162568  | 2.3343070  |
| H  | 3.3385701  | 2.8232286  | -0.7920561 |
| H  | 4.2009168  | 3.4277038  | 0.6635428  |
| Zn | -0.8038794 | 0.9971370  | 2.4973317  |
| Br | -1.6343125 | 0.2090968  | 4.5271055  |
| C  | -1.3729990 | -3.9972700 | 0.4431474  |
| C  | -2.2189421 | -4.1974788 | -0.6506706 |
| C  | -2.2955468 | -5.5296842 | -1.2116966 |
| C  | -3.0018102 | -5.8302200 | -2.4155938 |
| C  | -1.6071938 | -6.6117444 | -0.5466878 |
| C  | -1.7334678 | -7.9398641 | -1.0525174 |
| C  | -0.7534047 | -6.3291900 | 0.5580264  |
| H  | -0.1817649 | -7.1517341 | 1.0143667  |
| C  | -0.5751762 | -5.0343795 | 1.0204146  |
| C  | -2.8211863 | -0.8011801 | -2.3315015 |
| C  | -4.1473839 | -0.9345919 | -2.7268942 |
| H  | -4.6046844 | -0.1459635 | -3.3427852 |
| C  | -4.9529283 | -2.0310513 | -2.3080549 |
| C  | -6.3458671 | -2.0876354 | -2.6140015 |
| C  | -4.3603081 | -3.0868774 | -1.5246977 |
| C  | -5.2121506 | -4.1167110 | -1.0238179 |
| C  | -2.9444366 | -3.0439082 | -1.2478328 |
| C  | -2.2459631 | -1.8746878 | -1.5824090 |
| O  | -1.3129480 | -2.7464992 | 1.0449411  |
| O  | -0.9003748 | -1.7503529 | -1.2478278 |
| P  | -0.4896843 | -1.5094706 | 0.3284533  |
| O  | 1.0310941  | -1.7511644 | 0.3461286  |
| O  | -1.0519799 | -0.2151785 | 0.8970740  |
| C  | -2.4706599 | -8.2015709 | -2.1967363 |
| C  | -3.0897388 | -7.1308111 | -2.8930996 |
| H  | -1.2158209 | -8.7539386 | -0.5210324 |
| H  | -2.5587818 | -9.2306135 | -2.5770029 |
| H  | -3.4803825 | -5.0152720 | -2.9743529 |
| H  | -3.6421342 | -7.3308069 | -3.8238524 |
| C  | -6.5683465 | -4.1293970 | -1.3176556 |
| C  | -7.1402189 | -3.1174623 | -2.1338126 |
| H  | -4.7832098 | -4.8999162 | -0.3833537 |
| H  | -7.2065384 | -4.9269063 | -0.9075816 |
| H  | -8.2156031 | -3.1426847 | -2.3667332 |
| H  | -6.7826854 | -1.2808580 | -3.2233418 |
| C  | 1.8134614  | -4.4685615 | 1.5139822  |
| C  | 0.4826188  | -4.6094684 | 1.9843045  |
| C  | 2.7619410  | -3.8564488 | 2.3708273  |
| C  | 0.1256073  | -4.2015665 | 3.2986372  |
| C  | 1.0866105  | -3.5599146 | 4.0981177  |
| C  | 2.4137067  | -3.3779855 | 3.6611998  |
| H  | 3.8218822  | -3.8334940 | 2.0731683  |
| C  | -1.2571037 | -4.5196987 | 3.8567627  |
| H  | 0.8010617  | -3.2230593 | 5.1064962  |
| C  | -2.0011937 | -3.2854545 | 4.3758943  |
| H  | -1.4835352 | -2.8148604 | 5.2359776  |
| H  | -3.0209080 | -3.5616198 | 4.7137377  |
| H  | -2.0933763 | -2.5077128 | 3.5958148  |
| C  | -1.1442913 | -5.6137814 | 4.9372062  |
| H  | -1.8537289 | -4.9460290 | 3.0236252  |
| H  | -0.5552980 | -5.2576995 | 5.8084059  |
| H  | -0.6514261 | -6.5276400 | 4.5473172  |
| H  | -2.1516533 | -5.8951029 | 5.3071614  |
| C  | 3.4850763  | -2.8129840 | 4.5858674  |
| C  | 3.1352596  | -1.4075493 | 5.0999658  |
| H  | 3.9286866  | -1.0341638 | 5.7787080  |

### TS-7-j-ma

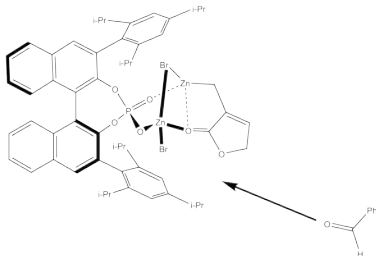

Energy (Hartree) = -11969.98096675

|   |            |            |            |
|---|------------|------------|------------|
| H | 2.1746902  | -1.3898285 | 5.6550611  |
| H | 3.0479519  | -0.6868571 | 4.2610333  |
| C | 3.7626351  | -3.7979303 | 5.7379364  |
| H | 4.4138545  | -2.7228847 | 3.9819515  |
| H | 4.6039162  | -3.4391694 | 6.3655574  |
| H | 4.0263539  | -4.8041496 | 5.3536010  |
| H | 2.8752822  | -3.9115629 | 6.3949861  |
| C | 2.2521421  | -5.0101691 | 0.1544664  |
| C | 3.1791972  | -4.0770248 | -0.6385562 |
| H | 3.4237707  | -4.5360634 | -1.6180519 |
| H | 4.1390878  | -3.8762220 | -0.1210097 |
| H | 2.6879829  | -3.1049557 | -0.8407109 |
| C | 2.8955652  | -6.3999593 | 0.3382542  |
| H | 1.3361188  | -5.1463741 | -0.4544845 |
| H | 3.1538389  | -6.8432654 | -0.6454003 |
| H | 2.2161199  | -7.1010255 | 0.8629323  |
| H | 3.8287117  | -6.3294239 | 0.9352519  |
| H | 0.1645160  | 4.6996898  | -2.5940472 |
| H | -0.1144008 | -0.0428508 | -6.1971964 |
| H | -5.6118322 | 2.5315927  | -1.0999022 |
| C | 0.3340003  | 4.0116909  | -3.4528168 |
| H | 1.1746054  | -2.3457834 | -4.3809526 |
| H | 2.3851209  | 4.7495786  | -3.6660453 |
| H | -4.0286637 | 2.4955237  | 0.9511084  |
| C | -0.4517594 | 2.7406967  | -3.1521461 |
| C | -0.7488901 | -0.8316184 | -5.7413067 |
| C | 1.8480680  | 3.7837772  | -3.5716014 |
| H | 2.1056141  | 3.1804149  | -4.4664568 |
| C | -0.1419717 | 1.5096551  | -3.7538329 |
| C | -4.7328295 | 2.4698908  | -1.7743611 |
| H | -1.3052728 | 4.9145206  | -4.6096050 |
| C | -1.5591489 | 2.7872500  | -2.2892036 |
| C | -0.2226139 | 4.7014499  | -4.7140319 |
| H | 0.3015720  | 5.6593648  | -4.9134586 |
| H | -1.8096934 | 3.7459589  | -1.8067046 |
| C | 0.9457220  | -1.3651171 | -3.9147974 |
| H | -0.5124637 | -1.7884770 | -6.2514690 |
| H | -1.8060918 | -0.5777633 | -5.9590723 |
| C | -0.8945776 | 0.3465470  | -3.5096623 |
| C | -3.1898010 | 2.5523434  | 0.2282070  |
| C | -2.3496590 | 1.6574459  | -2.0124997 |
| H | -5.0392497 | 1.9160444  | -2.6840130 |
| H | -4.4732055 | 3.5020872  | -2.0904400 |
| C | -0.5024883 | -0.9455751 | -4.2250091 |
| C | -2.0129072 | 0.4208670  | -2.6341970 |
| C | -3.5403623 | 1.7992142  | -1.0643863 |
| H | 1.1060876  | -1.4582588 | -2.8230358 |
| H | -2.2910793 | 2.1184606  | 0.7065285  |
| H | 1.6790806  | -0.6326420 | -4.3123207 |
| H | 2.2467901  | 3.2490695  | -2.6854880 |
| H | -2.9847562 | 3.6281156  | 0.0473218  |
| H | -0.0951645 | 4.0495868  | -5.6036241 |
| H | -1.1642553 | -1.7539933 | -3.8541702 |
| H | -3.8515228 | 0.7780962  | -0.7654716 |
| H | 0.7165561  | 1.4447201  | -4.4400689 |
| H | 0.2471651  | 2.9863717  | 3.4181033  |
| H | -0.5740009 | 3.6483976  | 1.9683242  |
| H | 1.7431055  | 4.6214889  | 0.5460203  |
| C | 2.9463326  | 15.0494712 | 1.0493946  |
| C | 3.3126372  | 13.7284608 | 1.3262309  |
| C | 4.6743444  | 13.3956035 | 1.4967629  |
| C | 5.6609376  | 14.3967766 | 1.3878426  |
| C | 5.2929048  | 15.7206568 | 1.1092432  |
| C | 3.9361613  | 16.0455064 | 0.9403308  |
| H | 1.8857527  | 15.3129618 | 0.9165248  |
| H | 2.5669643  | 12.9237026 | 1.4184636  |
| C | 5.0653234  | 11.9915273 | 1.7881610  |
| H | 6.7217033  | 14.1275283 | 1.5231169  |
| H | 6.0622256  | 16.5030660 | 1.0230058  |
| H | 3.6454449  | 17.0847952 | 0.7216436  |
| O | 4.2864812  | 11.0583500 | 1.8905956  |

H 6.1817751 11.8393013 1.9128988

### TS-7-j-mi; COSMO

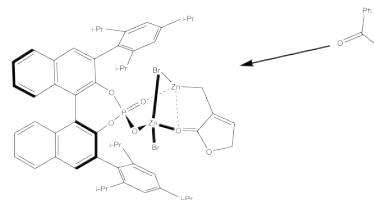

Energy (Hartree) = -11969.99218699

|    |            |            |            |
|----|------------|------------|------------|
| Zn | 2.5727322  | 1.4037960  | -0.4587100 |
| Br | 4.5126902  | 2.3006365  | -1.2525462 |
| C  | 0.4891964  | 5.1846506  | 2.6447598  |
| C  | 0.1044175  | 4.2063235  | 1.7685688  |
| C  | 1.3410845  | 3.4753481  | 1.4505931  |
| O  | 2.4104043  | 3.9909451  | 2.0575832  |
| C  | 1.9612448  | 5.0989879  | 2.8777552  |
| O  | 1.3996756  | 2.4604331  | 0.7289973  |
| C  | -1.1588332 | 3.7765521  | 1.1638954  |
| H  | 2.5215641  | 6.0062176  | 2.5621515  |
| H  | 2.2490622  | 4.8696785  | 3.9273231  |
| Zn | -1.4842374 | 1.8003833  | 1.3858360  |
| Br | -2.3058189 | 0.4399348  | 3.0877729  |
| H  | -1.0694225 | 3.8037667  | 0.0576797  |
| H  | -2.0186732 | 4.3940624  | 1.4840758  |
| H  | -0.1503241 | 5.9440895  | 3.1143893  |
| C  | -0.1844865 | -2.7512525 | -1.7180671 |
| C  | -0.7281868 | -2.7665519 | -3.0086552 |
| C  | -0.2876069 | -3.8085142 | -3.9114151 |
| C  | -0.6150657 | -3.8263853 | -5.3014941 |
| C  | 0.5576219  | -4.8630567 | -3.4034642 |
| C  | 0.9588786  | -5.9214137 | -4.2736106 |
| C  | 1.0350117  | -4.7988282 | -2.0635931 |
| H  | 1.7053786  | -5.5927745 | -1.7010216 |
| C  | 0.7370531  | -3.7292904 | -1.2287571 |
| C  | -2.0412132 | 0.7471921  | -3.8471016 |
| C  | -3.1636396 | 0.4420065  | -4.6088090 |
| H  | -3.7215180 | 1.2534468  | -5.1015621 |
| C  | -3.6454329 | -0.8942733 | -4.7312174 |
| C  | -4.8615839 | -1.1780307 | -5.4232322 |
| C  | -2.9170686 | -1.9782886 | -4.1149243 |
| C  | -3.4834663 | -3.2871699 | -4.1629615 |
| C  | -1.6615547 | -1.6950761 | -3.4601819 |
| C  | -1.3092613 | -0.3516270 | -3.2923135 |
| O  | -0.5810643 | -1.7634125 | -0.8164848 |
| O  | -0.1349592 | -0.0414173 | -2.6196299 |
| P  | -0.0469659 | -0.2276826 | -0.9889623 |
| O  | 1.4705690  | -0.1328592 | -0.7036590 |
| O  | -1.0035546 | 0.6756563  | -0.2324793 |
| C  | 0.5867749  | -5.9279158 | -5.6093342 |
| C  | -0.1896558 | -4.8578833 | -6.1280486 |
| H  | 1.5911398  | -6.7247953 | -3.8638881 |
| H  | 0.9090281  | -6.7458299 | -6.2716494 |
| H  | -1.2040029 | -3.0027597 | -5.7265097 |
| H  | -0.4525150 | -4.8406098 | -7.1968564 |
| C  | -4.6812980 | -3.5257314 | -4.8232745 |
| C  | -5.3697032 | -2.4676967 | -5.4749406 |
| H  | -2.9626569 | -4.1129223 | -3.6581047 |
| H  | -5.1023407 | -4.5426271 | -4.8372894 |
| H  | -6.3131553 | -2.6704078 | -6.0043989 |
| H  | -5.4005836 | -0.3447545 | -5.9010489 |
| C  | 2.7755611  | -3.1408631 | 0.1301533  |

|   |            |            |           |   |            |            |            |
|---|------------|------------|-----------|---|------------|------------|------------|
| C | 1.4035681  | -3.5248221 | 0.0949929 | H | 0.0945198  | 7.0579331  | -3.6601838 |
| C | 3.3647631  | -2.8756205 | 1.3800074 | H | 0.1039225  | 0.7837531  | -5.0343530 |
| C | 0.6644358  | -3.6450381 | 1.3018295 | H | -4.1460572 | 1.7353812  | -2.8920842 |
| C | 1.3034797  | -3.3669498 | 2.5233366 | H | 1.2513967  | 4.0575250  | -3.6208736 |
| C | 2.6508856  | -2.9726285 | 2.5875972 | C | -3.5925383 | -1.4395976 | 9.2258969  |
| H | 4.4249825  | -2.5756408 | 1.4194107 | C | -2.3503926 | -1.4006505 | 8.5829758  |
| C | -0.7871185 | -4.1181137 | 1.3100965 | C | -1.2233275 | -0.8818187 | 9.2591083  |
| H | 0.7248462  | -3.4584904 | 3.4552061 | C | -1.3549361 | -0.4013801 | 10.5794365 |
| C | -1.7213744 | -3.1381353 | 2.0358402 | C | -2.5999975 | -0.4439637 | 11.2234529 |
| H | -1.4739197 | -3.0501201 | 3.1139866 | C | -3.7171572 | -0.9636333 | 10.5462487 |
| H | -2.7750120 | -3.4797671 | 1.9660708 | H | -4.4733462 | -1.8413041 | 8.7018945  |
| H | -1.6613912 | -2.1212442 | 1.6038000 | H | -2.2206384 | -1.7630100 | 7.5514106  |
| C | -0.8853593 | -5.5398161 | 1.8958761 | C | 0.1008382  | -0.8464919 | 8.5882031  |
| H | -1.1271142 | -4.1803555 | 0.2557073 | H | -0.4709474 | 0.0038524  | 11.0992667 |
| H | -0.5587097 | -5.5580070 | 2.9568335 | H | -2.7034099 | -0.0727283 | 12.2545966 |
| H | -0.2468472 | -6.2530986 | 1.3353969 | H | -4.6955428 | -0.9978934 | 11.0505869 |
| H | -1.9312705 | -5.9095042 | 1.8584494 | O | 0.3283867  | -1.2727741 | 7.4654773  |
| C | 3.3511260  | -2.7180313 | 3.9175575 | H | 0.9223092  | -0.3810273 | 9.2127556  |

### TS-7-j-mi

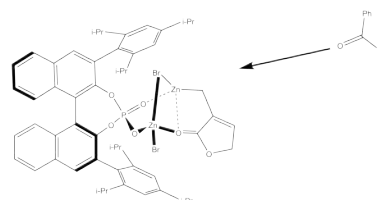

Energy (Hartree) = -11969.97475853  
number of imaginary frequencies: 4

|   |            |            |            |    |            |            |            |
|---|------------|------------|------------|----|------------|------------|------------|
| C | 1.4035681  | -3.5248221 | 0.0949929  | H  | 0.0945198  | 7.0579331  | -3.6601838 |
| C | 3.3647631  | -2.8756205 | 1.3800074  | H  | 0.1039225  | 0.7837531  | -5.0343530 |
| C | 0.6644358  | -3.6450381 | 1.3018295  | H  | -4.1460572 | 1.7353812  | -2.8920842 |
| C | 1.3034797  | -3.3669498 | 2.5233366  | H  | 1.2513967  | 4.0575250  | -3.6208736 |
| C | 2.6508856  | -2.9726285 | 2.5875972  | C  | -3.5925383 | -1.4395976 | 9.2258969  |
| H | 4.4249825  | -2.5756408 | 1.4194107  | C  | -2.3503926 | -1.4006505 | 8.5829758  |
| C | -0.7871185 | -4.1181137 | 1.3100965  | C  | -1.2233275 | -0.8818187 | 9.2591083  |
| H | 0.7248462  | -3.4584904 | 3.4552061  | C  | -1.3549361 | -0.4013801 | 10.5794365 |
| C | -1.7213744 | -3.1381353 | 2.0358402  | C  | -2.5999975 | -0.4439637 | 11.2234529 |
| H | -1.4739197 | -3.0501201 | 3.1139866  | C  | -3.7171572 | -0.9636333 | 10.5462487 |
| H | -2.7750120 | -3.4797671 | 1.9660708  | H  | -4.4733462 | -1.8413041 | 8.7018945  |
| H | -1.6613912 | -2.1212442 | 1.6038000  | H  | -2.2206384 | -1.7630100 | 7.5514106  |
| C | -0.8853593 | -5.5398161 | 1.8958761  | C  | 0.1008382  | -0.8464919 | 8.5882031  |
| H | -1.1271142 | -4.1803555 | 0.2557073  | H  | -0.4709474 | 0.0038524  | 11.0992667 |
| H | -0.5587097 | -5.5580070 | 2.9568335  | H  | -2.7034099 | -0.0727283 | 12.2545966 |
| H | -0.2468472 | -6.2530986 | 1.3353969  | H  | -4.6955428 | -0.9978934 | 11.0505869 |
| H | -1.9312705 | -5.9095042 | 1.8584494  | O  | 0.3283867  | -1.2727741 | 7.4654773  |
| C | 3.3511260  | -2.7180313 | 3.9175575  | H  | 0.9223092  | -0.3810273 | 9.2127556  |
| C | 2.4876523  | -1.9479785 | 4.9280264  |    |            |            |            |
| H | 3.0708524  | -1.6988425 | 5.8376399  |    |            |            |            |
| H | 1.6103019  | -2.5331564 | 5.2699508  |    |            |            |            |
| H | 2.0987615  | -1.0023351 | 4.4993635  |    |            |            |            |
| C | 3.8560415  | -4.0485089 | 4.5120208  |    |            |            |            |
| H | 4.2467213  | -2.0967289 | 3.6912537  |    |            |            |            |
| H | 4.4221375  | -3.8775267 | 5.4514472  |    |            |            |            |
| H | 4.5191933  | -4.5819641 | 3.8008546  |    |            |            |            |
| H | 3.0034987  | -4.7207626 | 4.7448747  |    |            |            |            |
| C | 3.6300231  | -3.0398662 | -1.1350187 |    |            |            |            |
| C | 4.4673896  | -1.7543630 | -1.2133864 |    |            |            |            |
| H | 5.0055912  | -1.6998125 | -2.1817581 |    |            |            |            |
| H | 5.2306708  | -1.6935399 | -0.4106070 |    |            |            |            |
| H | 3.8264135  | -0.8562018 | -1.1431152 |    |            |            |            |
| C | 4.5332090  | -4.2814679 | -1.2762534 |    |            |            |            |
| H | 2.9420549  | -3.0254735 | -2.0043838 |    |            |            |            |
| H | 5.1125486  | -4.2449400 | -2.2223748 |    |            |            |            |
| H | 3.9444661  | -5.2205615 | -1.2711807 |    |            |            |            |
| H | 5.2565290  | -4.3398591 | -0.4358576 |    |            |            |            |
| H | -0.4393925 | 5.9061950  | -0.8452561 |    |            |            |            |
| H | 1.0247836  | 3.4948323  | -6.1797322 |    |            |            |            |
| H | -5.8665967 | 3.4137349  | -2.3890989 |    |            |            |            |
| C | 0.0437453  | 5.8257154  | -1.8450810 | Zn | 2.5909993  | 1.3630406  | -0.3837826 |
| H | 2.5624882  | 0.8864673  | -5.1099838 | Br | 4.5897278  | 2.2472831  | -0.9973288 |
| H | 1.9007810  | 6.5990361  | -0.9826980 | C  | 0.4692752  | 5.2042964  | 2.6245033  |
| H | -4.9608233 | 1.9015572  | -0.5510169 | C  | 0.0984695  | 4.2079363  | 1.7616581  |
| C | -0.5272187 | 4.5671478  | -2.4902311 | C  | 1.3375596  | 3.4536720  | 1.5007946  |
| C | 0.5657535  | 2.4863183  | -6.2495972 | O  | 2.3944936  | 3.9764533  | 2.1261565  |
| C | 1.5613480  | 5.7549962  | -1.6167923 | C  | 1.9344136  | 5.1084671  | 2.9014194  |
| H | 2.1260611  | 5.8179215  | -2.5702796 | O  | 1.4076695  | 2.4169180  | 0.8149861  |
| C | 0.2272126  | 3.7568476  | -3.3551189 | C  | -1.1479977 | 3.7722186  | 1.1343676  |
| C | -4.8291680 | 3.7432417  | -2.6032931 | H  | 2.5144497  | 6.0010970  | 2.5775688  |
| H | -1.4452663 | 7.1687032  | -2.7511323 | H  | 2.1926367  | 4.9046451  | 3.9645385  |
| C | -1.8532392 | 4.1793646  | -2.2258146 | Zn | -1.4789317 | 1.7946706  | 1.3962923  |
| C | -0.3451372 | 7.0860163  | -2.6413128 | Br | -2.2639409 | 0.4534724  | 3.1075192  |
| H | 0.0198382  | 8.0040797  | -2.1353456 | H  | -1.0299598 | 3.7635109  | 0.0306867  |
| H | -2.4702238 | 4.8235358  | -1.5780675 | H  | -2.0132862 | 4.4008902  | 1.4154592  |
| C | 2.0119863  | 1.5260117  | -4.3900860 | H  | -0.1761954 | 5.9814929  | 3.0550345  |
| H | 1.1382095  | 1.9035643  | -7.0009163 | C  | -0.1891234 | -2.7416768 | -1.7246666 |
| H | -0.4690209 | 2.6133751  | -6.6278517 | C  | -0.7320627 | -2.7615507 | -3.0155364 |
| C | -0.2787754 | 2.5567471  | -3.8848483 | C  | -0.2904422 | -3.8043465 | -3.9164689 |
| C | -3.9200596 | 2.1765366  | -0.8186685 | C  | -0.6170066 | -3.8247949 | -5.3064695 |
| C | -2.4054639 | 2.9776996  | -2.7090602 | C  | 0.5555878  | -4.8567261 | -3.4064971 |
| H | -4.7774684 | 4.0487704  | -3.6682496 | C  | 0.9598755  | -5.9143905 | -4.2752286 |
| H | -4.6381280 | 4.6454028  | -1.9853976 | C  | 1.0308754  | -4.7889069 | -2.0666072 |
| C | 0.5765825  | 1.7748850  | -4.8814987 | H  | 1.7022897  | -5.5803686 | -1.7007217 |
| C | -1.5886938 | 2.1332364  | -3.5175356 | C  | 0.7334521  | -3.7179160 | -1.2335688 |
| C | -3.8333959 | 2.6118342  | -2.2935966 | C  | -2.0471434 | 0.7483169  | -3.8624166 |
| H | 2.0153798  | 1.0070058  | -3.4116124 | C  | -3.1705648 | 0.4400030  | -4.6212602 |
| H | -3.2767503 | 1.2946205  | -0.6301434 | H  | -3.7295331 | 1.2507914  | -5.1140021 |
| H | 2.5903046  | 2.4662978  | -4.2800227 | C  | -3.6515727 | -0.8966328 | -4.7405062 |
| H | 1.8625292  | 4.8076709  | -1.1242904 | C  | -4.8673540 | -1.1849698 | -5.4304244 |
| H | -3.6083924 | 2.9960442  | -0.1365660 | C  | -2.9209655 | -1.9778512 | -4.1226194 |
|   |            |            |            | C  | -3.4844348 | -3.2878251 | -4.1677582 |
|   |            |            |            | C  | -1.6653591 | -1.6919098 | -3.4699702 |
|   |            |            |            | C  | -1.3127826 | -0.3482632 | -3.3060677 |
|   |            |            |            | O  | -0.5860208 | -1.7502789 | -0.8273088 |
|   |            |            |            | O  | -0.1372479 | -0.0357944 | -2.6367436 |
|   |            |            |            | P  | -0.0477249 | -0.2175805 | -1.0049472 |



|   |            |            |            |   |            |            |            |
|---|------------|------------|------------|---|------------|------------|------------|
| O | 1.4726470  | -0.1341115 | -0.7250102 | H | 1.1192489  | 1.9011243  | -7.0266705 |
| O | -0.9898937 | 0.7017577  | -0.2509412 | H | -0.4909221 | 2.6004862  | -6.6476106 |
| C | 0.5897164  | -5.9231376 | -5.6108969 | C | -0.2857454 | 2.5575008  | -3.9057613 |
| C | -0.1888169 | -4.8561245 | -6.1310630 | C | -3.9146293 | 2.1606306  | -0.8309319 |
| H | 1.5941174  | -6.7153657 | -3.8639200 | C | -2.4071079 | 2.9776939  | -2.7211699 |
| H | 0.9153369  | -6.7405932 | -6.2720342 | H | -4.7818938 | 4.0632078  | -3.6575831 |
| H | -1.2078141 | -3.0028634 | -5.7319961 | H | -4.6364550 | 4.6412535  | -1.9699215 |
| H | -0.4510021 | -4.8405725 | -7.2000052 | C | 0.5684860  | 1.7760204  | -4.9033728 |
| C | -4.6813999 | -3.5303381 | -4.8270693 | C | -1.5945456 | 2.1348046  | -3.5353373 |
| C | -5.3724584 | -2.4753759 | -5.4796676 | C | -3.8336326 | 2.6103920  | -2.3016982 |
| H | -2.9601453 | -4.1104786 | -3.6617398 | H | 2.0172514  | 1.0263658  | -3.4329999 |
| H | -5.0996529 | -4.5483448 | -4.8392568 | H | -3.2681365 | 1.2796496  | -0.6507444 |
| H | -6.3157871 | -2.6810538 | -6.0080967 | H | 2.5854880  | 2.4775369  | -4.3210124 |
| H | -5.4089649 | -0.3539806 | -5.9092664 | H | 1.9028593  | 4.7782120  | -1.1955954 |
| C | 2.7794855  | -3.1368807 | 0.1161135  | H | -3.6033163 | 2.9744702  | -0.1418546 |
| C | 1.4049337  | -3.5121973 | 0.0870283  | H | 0.0485414  | 7.0800604  | -3.6269791 |
| C | 3.3743960  | -2.8734312 | 1.3634237  | H | 0.0998810  | 0.7819887  | -5.0496558 |
| C | 0.6696814  | -3.6277357 | 1.2962741  | H | -4.1498026 | 1.7398281  | -2.9070093 |
| C | 1.3151142  | -3.3524495 | 2.5147792  | H | 1.2475582  | 4.0532568  | -3.6414594 |
| C | 2.6649794  | -2.9670839 | 2.5739411  | C | -3.6174418 | -1.4328259 | 9.2698951  |
| H | 4.4369553  | -2.5809648 | 1.3986004  | C | -2.3775857 | -1.3822473 | 8.6239162  |
| C | -0.7822916 | -4.0989547 | 1.3102989  | C | -1.2528028 | -0.8592909 | 9.2993483  |
| H | 0.7398890  | -3.4414513 | 3.4488730  | C | -1.3853475 | -0.3854176 | 10.6211808 |
| C | -1.7140873 | -3.1193630 | 2.0390463  | C | -2.6278834 | -0.4395709 | 11.2684401 |
| H | -1.4623815 | -3.0282618 | 3.1158192  | C | -3.7424910 | -0.9644467 | 10.5922287 |
| H | -2.7675092 | -3.4620741 | 1.9755325  | H | -4.4967077 | -1.8380471 | 8.7460165  |
| H | -1.6605968 | -2.1031598 | 1.6049868  | H | -2.2450473 | -1.7372863 | 7.5902239  |
| C | -0.8769479 | -5.5209078 | 1.8961357  | C | 0.0705481  | -0.8170544 | 8.6232889  |
| H | -1.1260264 | -4.1617948 | 0.2571074  | H | -0.5026577 | 0.0238923  | 11.1403477 |
| H | -0.5467628 | -5.5392517 | 2.9558494  | H | -2.7314881 | -0.0736671 | 12.3015066 |
| H | -0.2391999 | -6.2336555 | 1.3343606  | H | -4.7191760 | -1.0085374 | 11.0991457 |
| H | -1.9224803 | -5.8917927 | 1.8626516  | O | 0.2975427  | -1.2422844 | 7.5026304  |
| C | 3.3737421  | -2.7258145 | 3.9018664  | H | 0.8913504  | -0.3462933 | 9.2481464  |
| C | 2.5194573  | -1.9655051 | 4.9275755  |   |            |            |            |
| H | 3.1113479  | -1.7234606 | 5.8333849  |   |            |            |            |
| H | 1.6463861  | -2.5543342 | 5.2744893  |   |            |            |            |
| H | 2.1250659  | -1.0166011 | 4.5119620  |   |            |            |            |
| C | 3.8812481  | -4.0640175 | 4.4766957  |   |            |            |            |
| H | 4.2686818  | -2.1031634 | 3.6757310  |   |            |            |            |
| H | 4.4534178  | -3.9062257 | 5.4146683  |   |            |            |            |
| H | 4.5380909  | -4.5902321 | 3.7545655  |   |            |            |            |
| H | 3.0294771  | -4.7381266 | 4.7060808  |   |            |            |            |
| C | 3.6308857  | -3.0473359 | -1.1522853 |   |            |            |            |
| C | 4.4710132  | -1.7649411 | -1.2439007 |   |            |            |            |
| H | 5.0133824  | -1.7226447 | -2.2105222 |   |            |            |            |
| H | 5.2319515  | -1.6934096 | -0.4399355 |   |            |            |            |
| H | 3.8326964  | -0.8640943 | -1.1872886 |   |            |            |            |
| C | 4.5301555  | -4.2923707 | -1.2870429 |   |            |            |            |
| H | 2.9409478  | -3.0378893 | -2.0200851 |   |            |            |            |
| H | 5.1048122  | -4.2662999 | -2.2363319 |   |            |            |            |
| H | 3.9394649  | -5.2299873 | -1.2700309 |   |            |            |            |
| H | 5.2574740  | -4.3464476 | -0.4500550 |   |            |            |            |
| H | -0.3984423 | 5.8595122  | -0.8261181 |   |            |            |            |
| H | 0.9975508  | 3.4942393  | -6.2109080 |   |            |            |            |
| H | -5.8667042 | 3.4152596  | -2.3810891 |   |            |            |            |
| C | 0.0583810  | 5.8066254  | -1.8400881 |   |            |            |            |
| H | 2.5552951  | 0.8896629  | -5.1330445 |   |            |            |            |
| H | 1.9328532  | 6.5639220  | -1.0002303 |   |            |            |            |
| H | -4.9535857 | 1.8803659  | -0.5620486 |   |            |            |            |
| C | -0.5239163 | 4.5604170  | -2.4995001 |   |            |            |            |
| C | 0.5464193  | 2.4818384  | -6.2741296 |   |            |            |            |
| C | 1.5815873  | 5.7376656  | -1.6511642 |   |            |            |            |
| H | 2.1225595  | 5.8353540  | -2.6154396 |   |            |            |            |
| C | 0.2237427  | 3.7543253  | -3.3731936 |   |            |            |            |
| C | -4.8296737 | 3.7453759  | -2.5961945 |   |            |            |            |
| H | -1.4588929 | 7.1694440  | -2.6657231 |   |            |            |            |
| C | -1.8502213 | 4.1749915  | -2.2332584 |   |            |            |            |
| C | -0.3559244 | 7.0845630  | -2.5935323 |   |            |            |            |
| H | 0.0256751  | 7.9915989  | -2.0799273 |   |            |            |            |
| H | -2.4628476 | 4.8153756  | -1.5776845 |   |            |            |            |
| C | 2.0074851  | 1.5352776  | -4.4167089 |   |            |            |            |

### agg-7-d-ma; COSMO

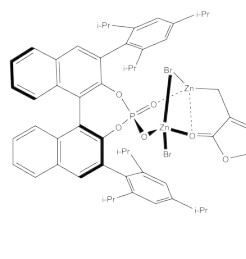

Energy (Hartree) = -11970.01919702

|    |            |            |            |
|----|------------|------------|------------|
| Zn | 0.6725774  | 5.7968535  | 88.8730247 |
| Br | -0.0304822 | 7.5079003  | 90.2605205 |
| C  | 4.8951329  | 8.2948982  | 86.9675058 |
| C  | 4.3400690  | 7.0505808  | 86.9271836 |
| C  | 3.5905034  | 6.9199815  | 88.1968645 |
| O  | 3.7477334  | 7.9912215  | 88.9801874 |
| C  | 4.5574028  | 8.9528258  | 88.2647826 |
| O  | 2.8471679  | 5.9687071  | 88.5074477 |
| C  | 4.3014689  | 5.9471921  | 85.9372649 |
| H  | 5.4476671  | 9.1920935  | 88.8867811 |
| H  | 3.9543311  | 9.8809137  | 88.1595421 |
| Zn | 2.6526385  | 4.8998807  | 86.3552725 |
| Br | 0.3404567  | 5.9057819  | 86.3953714 |
| C  | -0.1146943 | 0.8205433  | 88.9387370 |
| C  | 0.6556192  | -0.2597485 | 89.3835100 |
| C  | 0.0817954  | -1.1252413 | 90.3898386 |
| C  | 0.8201400  | -2.1543441 | 91.0491056 |
| C  | -1.2937384 | -0.9220272 | 90.7813259 |
| C  | -1.8883740 | -1.8046888 | 91.7329108 |
| C  | -2.0088425 | 0.2059549  | 90.2860172 |
| H  | -3.0290568 | 0.3909584  | 90.6558409 |
| C  | -1.4199557 | 1.1298149  | 89.4309285 |
| C  | 4.3277899  | 0.5539921  | 88.5840944 |

|   |            |            |            |   |            |            |            |
|---|------------|------------|------------|---|------------|------------|------------|
| C | 4.8131932  | -0.7034548 | 88.2400713 | C | 6.0994770  | 1.6780063  | 91.9698812 |
| H | 5.8840674  | -0.8240905 | 88.0159863 | C | 7.3280593  | 6.4677522  | 89.3785414 |
| C | 3.9542654  | -1.8309803 | 88.1021819 | H | 7.6822013  | 6.1130255  | 90.3687731 |
| C | 4.4554061  | -3.0864488 | 87.6424162 | C | 6.1799698  | 3.7366073  | 89.6070063 |
| C | 2.5447522  | -1.6939717 | 88.3822897 | C | 6.7754983  | 0.7588283  | 85.4998847 |
| C | 1.6920681  | -2.8071766 | 88.1148912 | H | 9.2920826  | 4.3528371  | 87.3884646 |
| C | 2.0512038  | -0.4357880 | 88.8892200 | C | 6.5008279  | 3.3820859  | 87.2529536 |
| C | 2.9409349  | 0.6469260  | 88.9204215 | C | 9.0839532  | 5.0615326  | 88.2150233 |
| O | 0.3977528  | 1.6521946  | 87.9456259 | H | 9.7122052  | 5.9635104  | 88.0617301 |
| O | 2.4876363  | 1.8902862  | 89.3481554 | H | 6.9338890  | 3.7044435  | 86.2911419 |
| P | 1.5309527  | 2.7654824  | 88.3438131 | C | 4.0919748  | 3.2336871  | 91.7726899 |
| O | 0.9826868  | 3.8927241  | 89.2244272 | H | 5.7359716  | 1.3233669  | 92.9566877 |
| O | 2.2277216  | 3.1016615  | 87.0149439 | H | 6.6638923  | 0.8504930  | 91.4935602 |
| C | -1.1530907 | -2.8238077 | 92.3191206 | C | 5.4177006  | 2.5566237  | 89.7061084 |
| C | 0.2186460  | -2.9826619 | 91.9873130 | C | 4.9128101  | 2.3583023  | 84.8659790 |
| H | -2.9420768 | -1.6432985 | 92.0098150 | C | 5.7215738  | 2.2118452  | 87.2854818 |
| H | -1.6220232 | -3.4933467 | 93.0562137 | H | 7.1756968  | 0.0704325  | 86.2716007 |
| H | 1.8851541  | -2.2858389 | 90.8156442 | H | 7.5717120  | 1.4984923  | 85.2721159 |
| H | 0.8141988  | -3.7648870 | 92.4823708 | C | 4.9210851  | 2.1325924  | 91.0870689 |
| C | 2.2074682  | -4.0079211 | 87.6459861 | C | 5.1782949  | 1.7847177  | 88.5351587 |
| C | 3.6027773  | -4.1580902 | 87.4238514 | C | 5.4876724  | 1.4586727  | 85.9738868 |
| H | 0.6100316  | -2.7022337 | 88.2755618 | H | 3.2668565  | 3.5790720  | 91.1202439 |
| H | 1.5275183  | -4.8486729 | 87.4400151 | H | 3.9703033  | 2.8354144  | 85.1977881 |
| H | 4.0009998  | -5.1180725 | 87.0614650 | H | 4.7159063  | 4.1138111  | 92.0343018 |
| H | 5.5350569  | -3.1804080 | 87.4456649 | H | 6.2495711  | 6.7048629  | 89.4778758 |
| C | -2.0499490 | 3.4177220  | 90.2385623 | H | 5.6189136  | 3.1601747  | 84.5659308 |
| C | -2.0179888 | 2.4764721  | 89.1676179 | H | 9.4039594  | 4.5768873  | 89.1612002 |
| C | -2.5639639 | 4.7038380  | 89.9862875 | H | 4.2606493  | 1.2525460  | 90.9591816 |
| C | -2.4729817 | 2.8531003  | 87.8750180 | H | 4.7304734  | 0.6734206  | 86.1660797 |
| C | -2.9811289 | 4.1503046  | 87.6814257 | H | 6.3470570  | 4.3268006  | 90.5198465 |
| C | -3.0449598 | 5.0922218  | 88.7244032 | H | 4.4442746  | 6.3035019  | 84.9000206 |
| H | -2.5885284 | 5.4403102  | 90.8043212 | H | 5.1078217  | 5.2172450  | 86.1683648 |
| C | -2.4685657 | 1.8711382  | 86.7055316 | H | 5.5043242  | 8.7770903  | 86.1905680 |
| H | -3.3453929 | 4.4321433  | 86.6806099 | C | 9.2140222  | 15.6087313 | 75.5982930 |
| C | -1.6934760 | 2.4113703  | 85.4912176 | C | 8.9398468  | 14.5595222 | 76.4819014 |
| H | -2.1748126 | 3.3175331  | 85.0683626 | C | 9.6405228  | 14.4671570 | 77.7053771 |
| H | -1.6539712 | 1.6485994  | 84.6859979 | C | 10.6148686 | 15.4333516 | 78.0328500 |
| H | -0.6549846 | 2.6788849  | 85.7667217 | C | 10.8886912 | 16.4846282 | 77.1460749 |
| C | -3.9055029 | 1.4665338  | 86.3252280 | C | 10.1882571 | 16.5710886 | 75.9301571 |
| H | -1.9519292 | 0.9494727  | 87.0438267 | H | 8.6701918  | 15.6843198 | 74.6441650 |
| H | -4.4895916 | 2.3419555  | 85.9711943 | H | 8.1849608  | 13.7914734 | 76.2527828 |
| H | -4.4437698 | 1.0328193  | 87.1925164 | C | 9.3539472  | 13.3565980 | 78.6471896 |
| H | -3.9008134 | 0.7126405  | 85.5105671 | H | 11.1566284 | 15.3533060 | 78.9898207 |
| C | -3.6643046 | 6.4705048  | 88.5241060 | H | 11.6484869 | 17.2394182 | 77.3999750 |
| C | -2.9756935 | 7.2822305  | 87.4158377 | H | 10.4023988 | 17.3959595 | 75.2328686 |
| H | -3.4533662 | 8.2782216  | 87.3088032 | O | 8.5305579  | 12.4734701 | 78.4559288 |
| H | -3.0395668 | 6.7723382  | 86.4318744 | H | 9.9729942  | 13.3810426 | 79.5943425 |
| H | -1.9046171 | 7.4396711  | 87.6494626 |   |            |            |            |
| C | -5.1802218 | 6.3527603  | 88.2764412 |   |            |            |            |
| H | -3.5175328 | 7.0250562  | 89.4764210 |   |            |            |            |
| H | -5.6475419 | 7.3566357  | 88.1999064 |   |            |            |            |
| H | -5.6818493 | 5.7998709  | 89.0965240 |   |            |            |            |
| H | -5.3891982 | 5.8112023  | 87.3296658 |   |            |            |            |
| C | -1.5613878 | 3.0905140  | 91.6518035 |   |            |            |            |
| C | -0.5457595 | 4.1110555  | 92.1940878 |   |            |            |            |
| H | -0.1947735 | 3.7991411  | 93.1996640 |   |            |            |            |
| H | -0.9773477 | 5.1278802  | 92.2911113 |   |            |            |            |
| H | 0.3343557  | 4.1837005  | 91.5274010 |   |            |            |            |
| C | -2.7550012 | 2.9345493  | 92.6140542 |   |            |            |            |
| H | -1.0385982 | 2.1144195  | 91.6127452 |   |            |            |            |
| H | -2.4088027 | 2.6438128  | 93.6277492 |   |            |            |            |
| H | -3.4684847 | 2.1626286  | 92.2606015 |   |            |            |            |
| H | -3.3163088 | 3.8878613  | 92.7085727 |   |            |            |            |
| H | 7.3213691  | 5.9023942  | 87.3040184 |   |            |            |            |
| H | 6.8116744  | 2.5101069  | 92.1520958 |   |            |            |            |
| H | 6.5883344  | 0.1694632  | 84.5784541 |   |            |            |            |
| C | 7.5882651  | 5.4310533  | 88.2774841 |   |            |            |            |
| H | 3.6486826  | 2.8535601  | 92.7159992 |   |            |            |            |
| H | 7.8706778  | 7.4096795  | 89.1585641 |   |            |            |            |
| H | 4.6891967  | 1.7589228  | 83.9598276 |   |            |            |            |
| C | 6.7333210  | 4.1726305  | 88.3934505 |   |            |            |            |

agg-7-d-ma

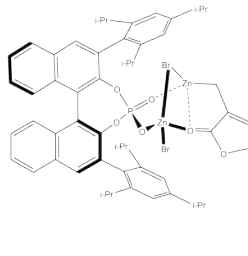

Energy (Hartree) = -11970.00326968

|    |            |           |            |
|----|------------|-----------|------------|
| Zn | 0.6027377  | 5.7786053 | 88.8785374 |
| Br | -0.0516630 | 7.5206692 | 90.2354595 |
| C  | 4.8713198  | 8.2979861 | 86.9714136 |
| C  | 4.3260577  | 7.0499271 | 86.9330697 |
| C  | 3.5788369  | 6.9138414 | 88.2076945 |
| O  | 3.7402035  | 7.9847920 | 88.9934110 |
| C  | 4.5367354  | 8.9504776 | 88.2750023 |
| O  | 2.8358318  | 5.9647873 | 88.5128309 |
| C  | 4.2872911  | 5.9423680 | 85.9508069 |
| H  | 5.4313952  | 9.1930863 | 88.8904483 |

|    |            |            |            |   |            |            |            |
|----|------------|------------|------------|---|------------|------------|------------|
| H  | 3.9265973  | 9.8755801  | 88.1789280 | C | -2.7439483 | 2.9511696  | 92.6055668 |
| Zn | 2.6276650  | 4.9131965  | 86.3859258 | H | -1.0308333 | 2.1161840  | 91.6113221 |
| Br | 0.3224111  | 5.8808356  | 86.3874041 | H | -2.4033037 | 2.6591041  | 93.6206715 |
| C  | -0.1117748 | 0.8148442  | 88.9351688 | H | -3.4634005 | 2.1852902  | 92.2512287 |
| C  | 0.6562544  | -0.2660311 | 89.3825950 | H | -3.2982564 | 3.9086418  | 92.6971029 |
| C  | 0.0796714  | -1.1297088 | 90.3887749 | H | 7.3225856  | 5.8998005  | 87.2995146 |
| C  | 0.8139860  | -2.1617244 | 91.0474895 | H | 6.8142101  | 2.5099850  | 92.1501820 |
| C  | -1.2949180 | -0.9215668 | 90.7806988 | H | 6.5801853  | 0.1841844  | 84.5667141 |
| C  | -1.8914540 | -1.8019061 | 91.7325134 | C | 7.5866261  | 5.4299744  | 88.2746959 |
| C  | -2.0058166 | 0.2086655  | 90.2852264 | H | 3.6496185  | 2.8532114  | 92.7178490 |
| H  | -3.0246137 | 0.3997005  | 90.6559452 | H | 7.8703007  | 7.4107401  | 89.1520556 |
| C  | -1.4154309 | 1.1294276  | 89.4282720 | H | 4.6638576  | 1.7593129  | 83.9662098 |
| C  | 4.3275802  | 0.5529374  | 88.5871693 | C | 6.7293983  | 4.1730968  | 88.3917896 |
| C  | 4.8156497  | -0.7034166 | 88.2438599 | C | 6.1012265  | 1.6785423  | 91.9685504 |
| H  | 5.8867836  | -0.8200115 | 88.0187342 | C | 7.3248625  | 6.4702738  | 89.3721347 |
| C  | 3.9598267  | -1.8330030 | 88.1068898 | H | 7.6764293  | 6.1181433  | 90.3640975 |
| C  | 4.4628265  | -3.0876686 | 87.6483011 | C | 6.1776310  | 3.7375699  | 89.6058782 |
| C  | 2.5501115  | -1.6983201 | 88.3862265 | C | 6.7691240  | 0.7739649  | 85.4874295 |
| C  | 1.6999594  | -2.8131256 | 88.1187076 | H | 9.2911017  | 4.3459023  | 87.3950878 |
| C  | 2.0532871  | -0.4412040 | 88.8921103 | C | 6.4948257  | 3.3828177  | 87.2518654 |
| C  | 2.9407500  | 0.6434056  | 88.9241942 | C | 9.0818040  | 5.0582636  | 88.2179275 |
| O  | 0.4025922  | 1.6432899  | 87.9410572 | H | 9.7133574  | 5.9578839  | 88.0640410 |
| O  | 2.4858361  | 1.8858585  | 89.3511478 | H | 6.9263056  | 3.7049080  | 86.2891197 |
| P  | 1.5303616  | 2.7590797  | 88.3425558 | C | 4.0922957  | 3.2334920  | 91.7745145 |
| O  | 0.9770638  | 3.8854907  | 89.2207541 | H | 5.7397344  | 1.3238364  | 92.9559514 |
| O  | 2.2370894  | 3.0996822  | 87.0199952 | H | 6.6653210  | 0.8515938  | 91.4913164 |
| C  | -1.1603951 | -2.8236905 | 92.3180541 | C | 5.4163328  | 2.5573182  | 89.7064358 |
| C  | 0.2097786  | -2.9880019 | 91.9851309 | C | 4.8840992  | 2.3566786  | 84.8744730 |
| H  | -2.9443068 | -1.6361356 | 92.0100737 | C | 5.7162782  | 2.2123232  | 87.2856806 |
| H  | -1.6315835 | -3.4909766 | 93.0557020 | H | 7.1833304  | 0.0886219  | 86.2543638 |
| H  | 1.8780884  | -2.2969511 | 90.8124555 | H | 7.5570565  | 1.5204923  | 85.2537372 |
| H  | 0.8025743  | -3.7730124 | 92.4790354 | C | 4.9215038  | 2.1333369  | 91.0879075 |
| C  | 2.2176762  | -4.0128744 | 87.6512283 | C | 5.1758474  | 1.7850446  | 88.5362116 |
| C  | 3.6128193  | -4.1607437 | 87.4299942 | C | 5.4789547  | 1.4600098  | 85.9741483 |
| H  | 0.6179600  | -2.7088906 | 88.2793363 | H | 3.2659947  | 3.5790276  | 91.1239111 |
| H  | 1.5392126  | -4.8547637 | 87.4453378 | H | 3.9361502  | 2.8150768  | 85.2159181 |
| H  | 4.0131556  | -5.1201312 | 87.0685082 | H | 4.7148308  | 4.1143838  | 92.0367720 |
| H  | 5.5427090  | -3.1795287 | 87.4518191 | H | 6.2464744  | 6.7085306  | 89.4690503 |
| C  | -2.0314321 | 3.4226463  | 90.2315694 | H | 5.5758503  | 3.1708899  | 84.5738101 |
| C  | -2.0074124 | 2.4782858  | 89.1633874 | H | 9.3977178  | 4.5750092  | 89.1659497 |
| C  | -2.5360705 | 4.7116419  | 89.9757196 | H | 4.2614197  | 1.9230914  | 90.9601002 |
| C  | -2.4608345 | 2.8541550  | 87.8701966 | H | 4.7311440  | 0.6670594  | 86.1708148 |
| C  | -2.9602081 | 4.1540606  | 87.6734831 | H | 6.3451493  | 4.3277794  | 90.5186214 |
| C  | -3.0171845 | 5.0993963  | 88.7134873 | H | 4.4471476  | 6.2846075  | 84.9117477 |
| H  | -2.5549870 | 5.4508625  | 90.7912380 | H | 5.0776046  | 5.2014591  | 86.2029232 |
| C  | -2.4665774 | 1.8676138  | 86.7046499 | H | 5.4736173  | 8.7835365  | 86.1912770 |
| H  | -3.3243352 | 4.4350720  | 86.6724602 | C | 9.2210973  | 15.6192631 | 75.6020616 |
| C  | -1.6913414 | 2.3957282  | 85.4854072 | C | 8.9398970  | 14.5677641 | 76.4802186 |
| H  | -2.1645500 | 3.3050934  | 85.0604861 | C | 9.6360473  | 14.4667820 | 77.7046794 |
| H  | -1.6626670 | 1.6299311  | 84.6827401 | C | 10.6119863 | 15.4276782 | 78.0391932 |
| H  | -0.6487553 | 2.6527318  | 85.7545831 | C | 10.8928857 | 16.4818085 | 77.1584055 |
| C  | -3.9079774 | 1.4721566  | 86.3321759 | C | 10.1976472 | 16.5759755 | 75.9407692 |
| H  | -1.9556172 | 0.9437068  | 87.0455002 | H | 8.6806708  | 15.7012692 | 74.6464639 |
| H  | -4.4870704 | 2.3500575  | 85.9765025 | H | 8.1832391  | 13.8018129 | 76.2498499 |
| H  | -4.4464168 | 1.0478740  | 87.2037952 | C | 9.3389022  | 13.3481507 | 78.6372079 |
| H  | -3.9131992 | 0.7144092  | 85.5211684 | H | 11.1501815 | 15.3412789 | 78.9977950 |
| C  | -3.6380292 | 6.4771570  | 88.5140485 | H | 11.6541211 | 17.2331892 | 77.4182078 |
| C  | -2.9657140 | 7.2868371  | 87.3947920 | H | 10.4181712 | 17.4023204 | 75.2472802 |
| H  | -3.4533852 | 8.2775289  | 87.2850576 | O | 8.5144740  | 12.4724829 | 78.4345411 |
| H  | -3.0320680 | 6.7709856  | 86.4141523 | H | 9.9549936  | 13.3640479 | 79.5889750 |
| H  | -1.8952334 | 7.4586749  | 87.6201495 |   |            |            |            |
| C  | -5.1567582 | 6.3543838  | 88.2865931 |   |            |            |            |
| H  | -3.4793023 | 7.0357992  | 89.4619410 |   |            |            |            |
| H  | -5.6284939 | 7.3564245  | 88.2141583 |   |            |            |            |
| H  | -5.6461616 | 5.8007897  | 89.1133065 |   |            |            |            |
| H  | -5.3768776 | 5.8103262  | 87.3438723 |   |            |            |            |
| C  | -1.5466090 | 3.0961814  | 91.6462736 |   |            |            |            |
| C  | -0.5254940 | 4.1111135  | 92.1888431 |   |            |            |            |
| H  | -0.1840355 | 3.8029710  | 93.1987145 |   |            |            |            |
| H  | -0.9459162 | 5.1333377  | 92.2763008 |   |            |            |            |
| H  | 0.3610026  | 4.1707744  | 91.5294669 |   |            |            |            |

### agg-7-d-mi; COSMO

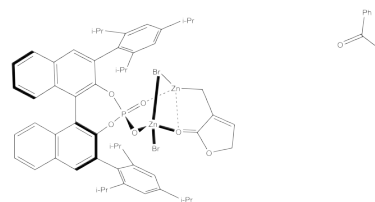

Energy (Hartree)= -11970.01901241

Zn 1.2047435 5.9236478 89.0955862

|    |            |            |            |   |            |            |            |
|----|------------|------------|------------|---|------------|------------|------------|
| Br | 0.5835716  | 7.6775665  | 90.4685471 | H | -2.9096555 | 7.3170197  | 89.7221230 |
| C  | 5.5012153  | 8.2648225  | 87.1645086 | H | -5.0418973 | 7.7180796  | 88.4690066 |
| C  | 4.9065956  | 7.0386356  | 87.1318057 | H | -5.1229789 | 6.1709622  | 89.3789988 |
| C  | 4.1592192  | 6.9372442  | 88.4054266 | H | -4.8520415 | 6.1570805  | 87.6087034 |
| O  | 4.3545239  | 8.0059058  | 89.1837354 | C | -1.0943382 | 3.3220891  | 91.9099337 |
| C  | 5.1915762  | 8.9380758  | 88.4609212 | C | -0.0335158 | 4.3040374  | 92.4368547 |
| O  | 3.3863951  | 6.0120006  | 88.7225214 | H | 0.3133296  | 3.9844528  | 93.4414490 |
| C  | 4.8277630  | 5.9321584  | 86.1476047 | H | -0.4226775 | 5.3381560  | 92.5309145 |
| H  | 6.0926282  | 9.1497284  | 89.0772959 | H | 0.8430574  | 4.3365446  | 91.7623539 |
| H  | 4.6186819  | 9.8851541  | 88.3561959 | C | -2.2858353 | 3.2218226  | 92.8821572 |
| Zn | 3.1459511  | 4.9427711  | 86.5771149 | H | -0.6122002 | 2.3252357  | 91.8740709 |
| Br | 0.8719517  | 6.0329351  | 86.6177660 | H | -1.9439794 | 2.9244459  | 93.8954022 |
| C  | 0.2437969  | 0.9815563  | 89.2001073 | H | -3.0329389 | 2.4771915  | 92.5396107 |
| C  | 0.9762195  | -0.1239296 | 89.6470441 | H | -2.8071158 | 4.1978768  | 92.9737845 |
| C  | 0.3768969  | -0.9612095 | 90.6625563 | H | 7.8503343  | 5.7791748  | 87.4911682 |
| C  | 1.0794911  | -2.0144088 | 91.3229444 | H | 7.2446772  | 2.4366967  | 92.3629065 |
| C  | -0.9870315 | -0.7032112 | 91.0624322 | H | 6.8893991  | 0.0699579  | 84.7974397 |
| C  | -1.6085996 | -1.5567484 | 92.0233930 | C | 8.1039997  | 5.3048348  | 88.4666743 |
| C  | -1.6619244 | 0.4485872  | 90.5656539 | H | 4.0999816  | 2.8954873  | 92.9418056 |
| H  | -2.6713240 | 0.6748962  | 90.9421310 | H | 8.4596533  | 7.2782658  | 89.3327882 |
| C  | -1.0447366 | 1.3438583  | 89.7002272 | H | 5.0402565  | 1.7171504  | 84.1872447 |
| C  | 4.6699830  | 0.5513504  | 88.8195661 | C | 7.2046044  | 4.0788608  | 88.5941935 |
| C  | 5.1079283  | -0.7249504 | 88.4812848 | C | 6.5024293  | 1.6293974  | 92.1890865 |
| H  | 6.1723481  | -0.8850391 | 88.2512464 | C | 7.8857334  | 6.3573502  | 89.5619247 |
| C  | 4.2084479  | -1.8220998 | 88.3570725 | H | 8.2323460  | 5.9971639  | 90.5528350 |
| C  | 4.6614502  | -3.0981794 | 87.9038492 | C | 6.6438411  | 3.6692172  | 89.8135474 |
| C  | 2.8065094  | -1.6325897 | 88.6447067 | C | 7.1042116  | 0.6575269  | 85.7140006 |
| C  | 1.9128917  | -2.7163318 | 88.3901126 | H | 9.7650239  | 4.1611270  | 87.5782921 |
| C  | 2.3613660  | -0.3539267 | 89.1454764 | C | 6.9355022  | 3.2919007  | 87.4592412 |
| C  | 3.2895254  | 0.6965074  | 89.1634751 | C | 9.5853250  | 4.8818333  | 88.4011526 |
| O  | 0.7795853  | 1.7861033  | 88.1967742 | H | 10.2444916 | 5.7601032  | 88.2400807 |
| O  | 2.8843468  | 1.9584799  | 89.5850238 | H | 7.3738200  | 3.5933751  | 86.4930012 |
| P  | 1.9536529  | 2.8612878  | 88.5807227 | C | 4.5500229  | 3.2538706  | 91.9931771 |
| O  | 1.4507324  | 4.0123519  | 89.4574109 | H | 6.1318586  | 1.2934395  | 93.1797809 |
| O  | 2.6536509  | 3.1652226  | 87.2458043 | H | 7.0347069  | 0.7797957  | 91.7147255 |
| C  | -0.9091420 | -2.6002524 | 92.6105412 | C | 5.8394162  | 2.5185800  | 89.9235786 |
| C  | 0.4530303  | -2.8137901 | 92.2699940 | C | 5.2873017  | 2.3126505  | 85.0899283 |
| H  | -2.6533729 | -1.3530553 | 92.3063134 | C | 6.1141457  | 2.1510577  | 87.5027579 |
| H  | -1.3984736 | -3.2469310 | 93.3548228 | H | 7.4898528  | -0.0393007 | 86.4855647 |
| H  | 2.1369579  | -2.1883376 | 91.0830908 | H | 7.9212611  | 1.3702605  | 85.4744654 |
| H  | 1.0213049  | -3.6160405 | 92.7650996 | C | 5.3360226  | 2.1201923  | 91.3097364 |
| C  | 2.3819716  | -3.9382291 | 87.9272665 | C | 5.5640637  | 1.7502830  | 88.7581302 |
| C  | 3.7696480  | -4.1401232 | 87.6983436 | C | 5.8439937  | 1.4002066  | 86.1967217 |
| H  | 0.8362811  | -2.5713890 | 88.5562008 | H | 3.7331582  | 3.6234914  | 91.3436141 |
| H  | 1.6710070  | -4.7554094 | 87.7314744 | H | 4.3606856  | 2.8166949  | 85.4267179 |
| H  | 4.1309293  | -5.1166622 | 87.3414322 | H | 5.2058610  | 4.1134552  | 92.2448120 |
| H  | 5.7357519  | -3.2325890 | 87.7014648 | H | 6.8167708  | 6.6327324  | 89.6650566 |
| C  | -1.5802493 | 3.6590798  | 90.4980775 | H | 6.0137294  | 3.0933902  | 84.7827528 |
| C  | -1.5924433 | 2.7109083  | 89.4329004 | H | 9.8915802  | 4.3921925  | 89.3493162 |
| C  | -2.0458965 | 4.9625337  | 90.2412538 | H | 4.6443306  | 1.2631884  | 91.1904699 |
| C  | -2.0417959 | 3.0970503  | 88.1411650 | H | 5.0642156  | 0.6401098  | 86.3995804 |
| C  | -2.4999373 | 4.4120020  | 87.9426973 | H | 6.8387445  | 4.2572198  | 90.7222867 |
| C  | -2.5200276 | 5.3619211  | 88.9801548 | H | 4.9788033  | 6.2779490  | 85.1079514 |
| H  | -2.0369174 | 5.7041410  | 91.0549500 | H | 5.6101212  | 5.1770369  | 86.3801877 |
| C  | -2.0861563 | 2.1079802  | 86.9786254 | H | 6.1221700  | 8.7245345  | 86.3834013 |
| H  | -2.8599632 | 4.7017792  | 86.9426739 | C | -1.9610689 | 17.6473366 | 76.4063520 |
| C  | -1.2999309 | 2.6078684  | 85.7543042 | C | -1.7685545 | 17.1866277 | 77.7130692 |
| H  | -1.7484546 | 3.5290898  | 85.3278884 | C | -2.8725797 | 16.7387277 | 78.4725083 |
| H  | -1.2971477 | 1.8379851  | 84.9549156 | C | -4.1665634 | 16.7574574 | 77.9110285 |
| H  | -0.2495224 | 2.8361941  | 86.0195980 | C | -4.3581343 | 17.2198352 | 76.6010053 |
| C  | -3.5414513 | 1.7595666  | 86.6126793 | C | -3.2556300 | 17.6640411 | 75.8502798 |
| H  | -1.6044659 | 1.1685748  | 87.3195445 | H | -1.1033675 | 17.9969495 | 75.8113996 |
| H  | -4.0917028 | 2.6555953  | 86.2560368 | C | -2.6742814 | 16.2488626 | 79.8595961 |
| H  | -4.0902050 | 1.3552080  | 87.4875958 | H | -5.0224819 | 16.4062838 | 78.5108570 |
| H  | -3.5742454 | 0.9998375  | 85.8040904 | H | -5.3670794 | 17.2352583 | 76.1614832 |
| C  | -3.0890405 | 6.7611721  | 88.7761694 | H | -3.4047028 | 18.0272164 | 74.8215107 |
| C  | -2.3850174 | 7.5380779  | 87.6528403 | O | -1.5959643 | 16.1960305 | 80.4330267 |
| H  | -2.8263649 | 8.5504882  | 87.5440459 | H | -0.7704578 | 17.1607373 | 78.1771024 |
| H  | -2.4806253 | 7.0235887  | 86.6738809 | H | -3.6250385 | 15.9135794 | 80.3733715 |
| H  | -1.3058845 | 7.6571060  | 87.8716144 |   |            |            |            |
| C  | -4.6113647 | 6.6981095  | 88.5482050 |   |            |            |            |

agg-7-d-mi

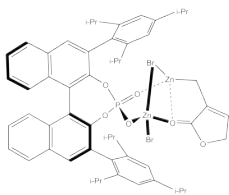

Energy (Hartree)= -11970.00314945

|    |            |            |            |
|----|------------|------------|------------|
| Zn | 1.1398579  | 5.9121875  | 89.1092076 |
| Br | 0.5630831  | 7.6858319  | 90.4596836 |
| C  | 5.4873015  | 8.2634116  | 87.1627110 |
| C  | 4.8959873  | 7.0362393  | 87.1339007 |
| C  | 4.1519208  | 6.9342815  | 88.4135524 |
| O  | 4.3573893  | 8.0023423  | 89.1927122 |
| C  | 5.1843651  | 8.9345921  | 88.4645642 |
| O  | 3.3762876  | 6.0146573  | 88.7275492 |
| C  | 4.8099810  | 5.9256714  | 86.1579375 |
| H  | 6.0907968  | 9.1478438  | 89.0735775 |
| H  | 4.6076557  | 9.8807133  | 88.3666764 |
| Zn | 3.1151694  | 4.9620600  | 86.6085737 |
| Br | 0.8467512  | 6.0112121  | 86.6189580 |
| C  | 0.2461429  | 0.9787108  | 89.1977113 |
| C  | 0.9768404  | -0.1271230 | 89.6466345 |
| C  | 0.3754426  | -0.9634484 | 90.6614069 |
| C  | 1.0754214  | -2.0182556 | 91.3214672 |
| C  | -0.9880001 | -0.7027331 | 91.0606397 |
| C  | -1.6106023 | -1.5554275 | 92.0208830 |
| C  | -1.6599902 | 0.4502534  | 90.5633005 |
| H  | -2.6686464 | 0.6806243  | 90.9393033 |
| C  | -1.0417067 | 1.3439727  | 89.6974097 |
| C  | 4.6706057  | 0.5517232  | 88.8237476 |
| C  | 5.1101225  | -0.7236609 | 88.4851868 |
| H  | 6.1749074  | -0.8809630 | 88.2547348 |
| C  | 4.2124166  | -1.8216914 | 88.3598128 |
| C  | 4.6659658  | -3.0964988 | 87.9052830 |
| C  | 2.8104093  | -1.6336193 | 88.6470317 |
| C  | 1.9181323  | -2.7178418 | 88.3912204 |
| C  | 2.3632316  | -0.3562093 | 89.1483643 |
| C  | 3.2900867  | 0.6953162  | 89.1680715 |
| O  | 0.7839327  | 1.7816725  | 88.1950453 |
| O  | 2.8841320  | 1.9563397  | 89.5895938 |
| P  | 1.9540045  | 2.8582071  | 88.5825095 |
| O  | 1.4484288  | 4.0085249  | 89.4582820 |
| O  | 2.6628494  | 3.1663847  | 87.2531400 |
| C  | -0.9140511 | -2.6004282 | 92.6075614 |
| C  | 0.4470715  | -2.8167910 | 92.2672983 |
| H  | -2.6548682 | -1.3494473 | 92.3038930 |
| H  | -1.4049504 | -3.2460375 | 93.3516005 |
| H  | 2.1323385  | -2.1938314 | 91.0808355 |
| H  | 1.0136904  | -3.6204549 | 92.7618907 |
| C  | 2.3883499  | -3.9383470 | 87.9272511 |
| C  | 3.7756658  | -4.1386701 | 87.6981739 |
| H  | 0.8417544  | -2.5730451 | 88.5580873 |
| H  | 1.6780700  | -4.7557479 | 87.7302648 |
| H  | 4.1380980  | -5.1140944 | 87.3396086 |
| H  | 5.7404735  | -3.2291803 | 87.7026988 |
| C  | -1.5679895 | 3.6624435  | 90.4918315 |
| C  | -1.5854434 | 2.7122240  | 89.4287441 |
| C  | -2.0266501 | 4.9677328  | 90.2319863 |
| C  | -2.0331685 | 3.0975362  | 88.1363879 |
| C  | -2.4857801 | 4.4138141  | 87.9355718 |
| C  | -2.5013548 | 5.3661537  | 88.9706423 |
| H  | -2.0134378 | 5.7114427  | 91.0435260 |
| C  | -2.0827810 | 2.1056657  | 86.9764228 |
| H  | -2.8457537 | 4.7027226  | 86.9353079 |
| C  | -1.2966251 | 2.5984298  | 85.7494306 |
| H  | -1.7388204 | 3.5223233  | 85.3223936 |
| H  | -1.3013390 | 1.8278289  | 84.9508760 |

|   |            |            |            |
|---|------------|------------|------------|
| H | -0.2436105 | 2.8183531  | 86.0106498 |
| C | -3.5401318 | 1.7614555  | 86.6152952 |
| H | -1.6038122 | 1.1654913  | 87.3191435 |
| H | -4.0888501 | 2.6581343  | 86.2583385 |
| H | -4.0881272 | 1.3618928  | 87.4926491 |
| H | -3.5785085 | 1.0000196  | 85.8086191 |
| C | -3.0725764 | 6.7646436  | 88.7673589 |
| C | -2.3781290 | 7.5431829  | 87.6395763 |
| H | -2.8296582 | 8.5505709  | 87.5273559 |
| H | -2.4694455 | 7.0248851  | 86.6622637 |
| H | -1.3006745 | 7.6767915  | 87.8574562 |
| C | -4.5961925 | 6.6963230  | 88.5498889 |
| H | -2.8875543 | 7.3221196  | 89.7111484 |
| H | -5.0313520 | 7.7145803  | 88.4748846 |
| H | -5.1002906 | 6.1654033  | 89.3826388 |
| H | -4.8419322 | 6.1556790  | 87.6115734 |
| C | -1.0865496 | 3.3259561  | 91.9053359 |
| C | -0.0254288 | 4.3055221  | 92.4359299 |
| H | 0.3111191  | 3.9902329  | 93.4452394 |
| H | -0.4074068 | 5.3429714  | 92.5206644 |
| H | 0.8583354  | 4.3292263  | 91.7706361 |
| C | -2.2824194 | 3.2302923  | 92.8726288 |
| H | -0.6073251 | 2.3275226  | 91.8727173 |
| H | -1.9465212 | 2.9315638  | 93.8873673 |
| H | -3.0317289 | 2.4893838  | 92.5270784 |
| H | -2.8006948 | 4.2079477  | 92.9619299 |
| H | 7.8513773  | 5.7782053  | 87.4885242 |
| H | 7.2494838  | 2.4355865  | 92.3609866 |
| H | 6.8826920  | 0.0788482  | 84.7921248 |
| C | 8.1043204  | 5.3042473  | 88.4646270 |
| H | 4.1028520  | 2.8971977  | 92.9454217 |
| H | 8.4656061  | 7.2779835  | 89.3292618 |
| H | 5.0213179  | 1.7196981  | 84.1945520 |
| C | 7.2024658  | 4.0801935  | 88.5938844 |
| C | 6.5054233  | 1.6298234  | 92.1883277 |
| C | 7.8876059  | 6.3592757  | 89.5578587 |
| H | 8.2322961  | 5.9998055  | 90.5495981 |
| C | 6.6426989  | 3.6716245  | 89.8136833 |
| C | 7.0989148  | 0.6665867  | 85.7081703 |
| H | 9.7625444  | 4.1540865  | 87.5804705 |
| C | 6.9318557  | 3.2930493  | 87.4597948 |
| C | 9.5845460  | 4.8778506  | 88.4007454 |
| H | 10.2475707 | 5.7530004  | 88.2383159 |
| H | 7.3688689  | 3.5939710  | 86.4926773 |
| C | 4.5532614  | 3.2559420  | 91.9973268 |
| H | 6.1373180  | 1.2940080  | 93.1798778 |
| H | 7.0359743  | 0.7802490  | 91.7124127 |
| C | 5.8392172  | 2.5206656  | 89.9253539 |
| C | 5.2686628  | 2.3136120  | 85.0981159 |
| C | 6.1110587  | 2.1521469  | 87.5047902 |
| H | 7.4928866  | -0.0289209 | 86.4765918 |
| H | 7.9119980  | 1.3825621  | 85.4651757 |
| C | 5.3376653  | 2.1225196  | 91.3120857 |
| C | 5.5632274  | 1.7515754  | 88.7608776 |
| C | 5.8378918  | 1.4019819  | 86.1990458 |
| H | 3.7360825  | 3.6278847  | 91.3497191 |
| H | 4.3398590  | 2.8074296  | 85.4429316 |
| H | 5.2091554  | 4.1148678  | 92.2509314 |
| H | 6.8192680  | 6.6373089  | 89.6600035 |
| H | 5.9874234  | 3.1007443  | 84.7888150 |
| H | 9.8885652  | 4.3882260  | 89.3493807 |
| H | 4.6451958  | 1.2661999  | 91.1931340 |
| H | 5.0630279  | 0.6378872  | 86.4050328 |
| H | 6.8373800  | 4.2600794  | 90.7221345 |
| H | 4.9766086  | 6.2562080  | 85.1161549 |
| H | 5.5732541  | 5.1568099  | 86.4096979 |
| H | 6.1026858  | 8.7225713  | 86.3768577 |
| C | -1.9615283 | 17.6461231 | 76.4103736 |
| C | -1.7697800 | 17.1828119 | 77.7159159 |
| C | -2.8736020 | 16.7357641 | 78.4745914 |
| C | -4.1668179 | 16.7595291 | 77.9139221 |

|   |            |            |            |
|---|------------|------------|------------|
| C | -4.3582942 | 17.2247049 | 76.6051214 |
| C | -3.2555251 | 17.6669721 | 75.8546790 |
| H | -1.1031576 | 17.9944944 | 75.8155542 |
| C | -2.6690057 | 16.2402297 | 79.8612621 |
| H | -5.0231528 | 16.4097068 | 78.5142084 |
| H | -5.3673742 | 17.2436801 | 76.1660533 |
| H | -3.4043519 | 18.0319871 | 74.8265239 |
| O | -1.5902742 | 16.1845588 | 80.4275172 |
| H | -0.7736233 | 17.1523848 | 78.1839089 |
| H | -3.6203965 | 15.9036039 | 80.3773839 |

### agg-7-j-ma; COSMO

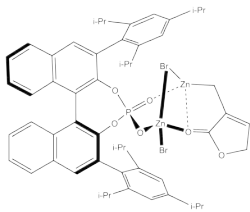

Energy (Hartree)= -11970.01905984

|    |            |            |            |
|----|------------|------------|------------|
| Zn | 0.6591928  | 5.7900513  | 88.8651144 |
| Br | -0.0322599 | 7.5097421  | 90.2478094 |
| C  | 4.8864989  | 8.2988435  | 86.9782295 |
| C  | 4.3356208  | 7.0526925  | 86.9346557 |
| C  | 3.5809635  | 6.9186464  | 88.2010191 |
| O  | 3.7302522  | 7.9904852  | 88.9852331 |
| C  | 4.5392063  | 8.9557338  | 88.2736237 |
| O  | 2.8398147  | 5.9644465  | 88.5077430 |
| C  | 4.3040090  | 5.9494206  | 85.9442311 |
| H  | 5.4250680  | 9.2002777  | 88.8998908 |
| H  | 3.9316676  | 9.8805579  | 88.1645192 |
| Zn | 2.6565123  | 4.8970854  | 86.3568854 |
| Br | 0.3416107  | 5.8970986  | 86.3850674 |
| C  | -0.1145664 | 0.8160854  | 88.9382149 |
| C  | 0.6546502  | -0.2644108 | 89.3845914 |
| C  | 0.0790005  | -1.1289522 | 90.3908987 |
| C  | 0.8146873  | -2.1602711 | 91.0499620 |
| C  | -1.2961602 | -0.9225234 | 90.7825560 |
| C  | -1.8928933 | -1.8036295 | 91.7342077 |
| C  | -2.0090860 | 0.2070813  | 90.2876306 |
| H  | -3.0284375 | 0.3950830  | 90.6586262 |
| C  | -1.4188324 | 1.1285750  | 89.4310299 |
| C  | 4.3261362  | 0.5533777  | 88.5857921 |
| C  | 4.8138166  | -0.7034604 | 88.2429152 |
| H  | 5.8848223  | -0.8221408 | 88.0184240 |
| C  | 3.9568909  | -1.8326314 | 88.1065158 |
| C  | 4.4603025  | -3.0876407 | 87.6477799 |
| C  | 2.5471139  | -1.6975801 | 88.3864089 |
| C  | 1.6964298  | -2.8123467 | 88.1191648 |
| C  | 2.0510964  | -0.4397922 | 88.8921285 |
| C  | 2.9393336  | 0.6443571  | 88.9228454 |
| O  | 0.3986251  | 1.6455119  | 87.9433903 |
| O  | 2.4844292  | 1.8876712  | 89.3495311 |
| P  | 1.5291486  | 2.7613049  | 88.3422771 |
| O  | 0.9769778  | 3.8884151  | 89.2204942 |
| O  | 2.2275620  | 3.0984041  | 87.0145282 |
| C  | -1.1602890 | -2.8247858 | 92.3202265 |
| C  | 0.2109687  | -2.9873706 | 91.9879640 |
| H  | -2.9461662 | -1.6391129 | 92.0109615 |
| H  | -1.6310274 | -3.4928977 | 93.0574969 |
| H  | 1.8793024  | -2.2948477 | 90.8161836 |
| H  | 0.8043809  | -3.7715158 | 92.4826260 |
| C  | 2.2137636  | -4.0124470 | 87.6507092 |

|   |            |            |            |
|---|------------|------------|------------|
| C | 3.6094220  | -4.1606674 | 87.4293119 |
| H | 0.6141753  | -2.7092192 | 88.2792768 |
| H | 1.5351892  | -4.8543083 | 87.4448041 |
| H | 4.0092440  | -5.1202157 | 87.0675053 |
| H | 5.5402077  | -3.1800142 | 87.4515924 |
| C | -2.0402861 | 3.4200111  | 90.2351896 |
| C | -2.0128830 | 2.4765955  | 89.1661357 |
| C | -2.5486570 | 4.7078425  | 89.9804426 |
| C | -2.4665070 | 2.8526501  | 87.8729075 |
| C | -2.9685103 | 4.1518669  | 87.6766152 |
| C | -3.0282030 | 5.0960280  | 88.7178135 |
| H | -2.5705311 | 5.4458452  | 90.7971186 |
| C | -2.4688808 | 1.8673990  | 86.7062732 |
| H | -3.3321797 | 4.4330946  | 86.6755000 |
| C | -1.6923399 | 2.3988885  | 85.4890748 |
| H | -2.1695927 | 3.3056573  | 85.0629018 |
| H | -1.6574045 | 1.6325458  | 84.6870391 |
| H | -0.6522023 | 2.6621841  | 85.7624209 |
| C | -3.9089392 | 1.4704042  | 86.3297346 |
| H | -1.9572950 | 0.9437475  | 87.0467960 |
| H | -4.4876683 | 2.3482402  | 85.9729553 |
| H | -4.4487674 | 1.0442692  | 87.1998228 |
| H | -3.9105652 | 0.7130743  | 85.5182621 |
| C | -3.6474185 | 6.4743278  | 88.5171332 |
| C | -2.9703114 | 7.2821062  | 87.3991290 |
| H | -3.4509156 | 8.2766765  | 87.2921975 |
| H | -3.0422945 | 6.7680519  | 86.4178936 |
| H | -1.8975276 | 7.4429441  | 87.6222614 |
| C | -5.1656524 | 6.3548688  | 88.2842012 |
| H | -3.4916534 | 7.0326191  | 89.4658222 |
| H | -5.6344706 | 7.3581701  | 88.2093291 |
| H | -5.6589843 | 5.8036281  | 89.1104069 |
| H | -5.3827780 | 5.8104271  | 87.3408950 |
| C | -1.5531584 | 3.0934724  | 91.6490783 |
| C | -0.5319198 | 4.1095928  | 92.1892674 |
| H | -0.1838793 | 3.7986139  | 93.1961556 |
| H | -0.9575234 | 5.1292787  | 92.2826596 |
| H | 0.3494357  | 4.1747642  | 91.5234582 |
| C | -2.7477269 | 2.9465046  | 92.6115204 |
| H | -1.0359340 | 2.1143695  | 91.6123914 |
| H | -2.4033649 | 2.6551628  | 93.6256605 |
| H | -3.4661448 | 2.1786605  | 92.2591739 |
| H | -3.3028655 | 3.9035566  | 92.7044399 |
| H | 7.3223713  | 5.8996769  | 87.3000310 |
| H | 6.8127180  | 2.5111099  | 92.1513440 |
| H | 6.5826766  | 0.1796267  | 84.5696489 |
| C | 7.5866557  | 5.4300407  | 88.2750323 |
| H | 3.6513869  | 2.8541345  | 92.7176017 |
| H | 7.8663315  | 7.4106976  | 89.1526847 |
| H | 4.6737154  | 1.7576909  | 83.9620403 |
| C | 6.7310978  | 4.1720902  | 88.3914302 |
| C | 6.1007242  | 1.6787435  | 91.9696555 |
| C | 7.3240709  | 6.4688145  | 89.3736591 |
| H | 7.6766738  | 6.1162642  | 90.3652198 |
| C | 6.1794999  | 3.7360765  | 89.6057917 |
| C | 6.7710802  | 0.7690545  | 85.4907960 |
| H | 9.2921590  | 4.3494999  | 87.3922319 |
| C | 6.4963994  | 3.3819833  | 87.2511062 |
| C | 9.0823443  | 5.0598409  | 88.2169536 |
| H | 9.7112452  | 5.9613520  | 88.0635942 |
| H | 6.9283903  | 3.7043463  | 86.2887664 |
| C | 4.0925954  | 3.2335063  | 91.7730286 |
| H | 5.7378133  | 1.3243426  | 92.9567568 |
| H | 6.6652142  | 0.8512025  | 91.4935256 |
| C | 5.4168487  | 2.5564767  | 89.7058363 |
| C | 4.8940714  | 2.3564034  | 84.8694704 |
| C | 5.7168190  | 2.2119077  | 87.2845429 |
| H | 7.1804650  | 0.0826471  | 86.2594791 |
| H | 7.5606791  | 1.5145182  | 85.2589914 |
| C | 4.9216778  | 2.1324863  | 91.0873225 |
| C | 5.1753596  | 1.7848806  | 88.5350994 |

|   |            |            |            |
|---|------------|------------|------------|
| C | 5.4810876  | 1.4591122  | 85.9729562 |
| H | 3.2659647  | 3.5771026  | 91.1215818 |
| H | 3.9476000  | 2.8223679  | 85.2055271 |
| H | 4.7159788  | 4.1146755  | 92.0323750 |
| H | 6.2452829  | 6.7054946  | 89.4705226 |
| H | 5.5912665  | 3.1663298  | 84.5702144 |
| H | 9.3997756  | 4.5767430  | 89.1647957 |
| H | 4.2615447  | 1.2520889  | 90.9601630 |
| H | 4.7305376  | 0.6682068  | 86.1677834 |
| H | 6.3487167  | 4.3259937  | 90.5184458 |
| H | 4.4507083  | 6.3067418  | 84.9078702 |
| H | 5.1114614  | 5.2216298  | 86.1781620 |
| H | 5.4989666  | 8.7832885  | 86.2052350 |
| C | 14.5422654 | 18.3904597 | 78.3571326 |
| C | 13.3290852 | 18.0892229 | 78.9850432 |
| C | 12.6391856 | 19.0914345 | 79.7033616 |
| C | 13.1757138 | 20.3935798 | 79.7854782 |
| C | 14.3920353 | 20.6942000 | 79.1556049 |
| C | 15.0737371 | 19.6926791 | 78.4423272 |
| H | 15.0828558 | 17.6124497 | 77.7963870 |
| H | 12.8867484 | 17.0820978 | 78.9374896 |
| C | 11.3517331 | 18.7780515 | 80.3720267 |
| H | 12.6305322 | 21.1694627 | 80.3480799 |
| H | 14.8120442 | 21.7096409 | 79.2187421 |
| H | 16.0288286 | 19.9273658 | 77.9470986 |
| O | 10.8074540 | 17.6834259 | 80.3602804 |
| H | 10.8868115 | 19.6542600 | 80.9165293 |

|   |            |            |            |
|---|------------|------------|------------|
| C | 1.6999254  | -2.8131963 | 88.1187194 |
| C | 2.0532811  | -0.4412777 | 88.8920932 |
| C | 2.9407331  | 0.6433404  | 88.9241650 |
| O | 0.4026234  | 1.6431778  | 87.9409277 |
| O | 2.4858339  | 1.8858239  | 89.3510990 |
| P | 1.5303364  | 2.7589607  | 88.3424866 |
| O | 0.9770114  | 3.8854619  | 89.2205246 |
| O | 2.2371826  | 3.0995982  | 87.0199317 |
| C | -1.1604333 | -2.8236486 | 92.3181009 |
| C | 0.2097475  | -2.9879885 | 91.9851825 |
| H | -2.9443206 | -1.6360272 | 92.0100851 |
| H | -1.6316512 | -3.4909045 | 93.0557289 |
| H | 1.8780741  | -2.2970104 | 90.8125146 |
| H | 0.8025266  | -3.7729723 | 92.4791181 |
| C | 2.2176318  | -4.0129731 | 87.6512778 |
| C | 3.6127724  | -4.1608393 | 87.4300482 |
| H | 0.6179263  | -2.7089298 | 88.2793297 |
| H | 1.5391556  | -4.8548365 | 87.4453965 |
| H | 4.0130843  | -5.1202568 | 87.0685859 |
| H | 5.5426759  | -3.1796984 | 87.4518967 |
| C | -2.0313609 | 3.4226456  | 90.2315441 |
| C | -2.0073689 | 2.4782961  | 89.1633583 |
| C | -2.5359889 | 4.7116511  | 89.9757008 |
| C | -2.4608049 | 2.8541581  | 87.8701754 |
| C | -2.9601719 | 4.1540710  | 87.6734513 |
| C | -3.0171174 | 5.0994236  | 88.7134679 |
| H | -2.5549155 | 5.4508554  | 90.7912250 |
| C | -2.4666055 | 1.8675883  | 86.7046302 |
| H | -3.3243456 | 4.4350755  | 86.6724563 |
| C | -1.6913658 | 2.3956939  | 85.4853813 |
| H | -2.1645677 | 3.3050780  | 85.0604831 |
| H | -1.6627030 | 1.6298925  | 84.6827084 |
| H | -0.6487749 | 2.6526827  | 85.7545837 |
| C | -3.9080235 | 1.4721485  | 86.3321771 |
| H | -1.9556498 | 0.9436700  | 87.0454819 |
| H | -4.4871192 | 2.3500635  | 85.9765224 |
| H | -4.4464420 | 1.0479053  | 87.2038181 |
| H | -3.9132932 | 0.7143708  | 85.5211858 |
| C | -3.6379758 | 6.4771721  | 88.5140041 |
| C | -2.9656763 | 7.2868604  | 87.3947279 |
| H | -3.4533437 | 8.2775603  | 87.2850264 |
| H | -3.0320756 | 6.7710124  | 86.4140786 |
| H | -1.8951942 | 7.4586965  | 87.6200764 |
| C | -5.1567094 | 6.3543988  | 88.2865640 |
| H | -3.4792419 | 7.0358551  | 89.4618691 |
| H | -5.6284340 | 7.3564416  | 88.2141535 |
| H | -5.6461050 | 5.8008308  | 89.1133114 |
| H | -5.3768681 | 5.8103383  | 87.3438578 |
| C | -1.5465626 | 3.0962184  | 91.6462668 |
| C | -0.5254597 | 4.1111573  | 92.1888332 |
| H | -0.1839995 | 3.8030261  | 93.1987056 |
| H | -0.9458609 | 5.1333764  | 92.2762965 |
| H | 0.3610698  | 4.1708165  | 91.5294913 |
| C | -2.7439176 | 2.9512199  | 92.6055344 |
| H | -1.0307698 | 2.1162248  | 91.6113400 |
| H | -2.4033165 | 2.6591597  | 93.6206382 |
| H | -3.4633904 | 2.1853584  | 92.2511791 |
| H | -3.2982164 | 3.9086986  | 92.6970554 |
| H | 7.3226340  | 5.8997664  | 87.2995487 |
| H | 6.8142382  | 2.5099656  | 92.1501557 |
| H | 6.5801535  | 0.1840131  | 84.5667146 |
| C | 7.5866697  | 5.4299069  | 88.2747206 |
| H | 3.6496397  | 2.8532134  | 92.7178429 |
| H | 7.8703425  | 7.4106726  | 89.1520829 |
| H | 4.6637221  | 1.7591722  | 83.9662675 |
| C | 6.7294125  | 4.1730524  | 88.3917682 |
| C | 6.1012503  | 1.6785248  | 91.9685267 |
| C | 7.3249181  | 6.4702129  | 89.3721592 |
| H | 7.6765320  | 6.1181123  | 90.3641074 |
| C | 6.1776054  | 3.7375231  | 89.6058393 |
| C | 6.7690833  | 0.7738506  | 85.4874157 |

### agg-7-j-ma

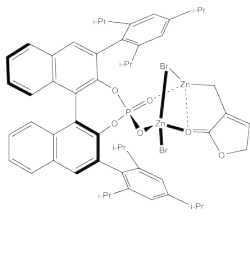

Energy (Hartree)= -11970.00324804

|    |            |            |            |
|----|------------|------------|------------|
| Zn | 0.6022769  | 5.7784818  | 88.8785681 |
| Br | -0.0517826 | 7.5208894  | 90.2349731 |
| C  | 4.8715591  | 8.2981801  | 86.9719507 |
| C  | 4.3261127  | 7.0502279  | 86.9332752 |
| C  | 3.5786982  | 6.9140565  | 88.2077756 |
| O  | 3.7399210  | 7.9848474  | 88.9935643 |
| C  | 4.5367643  | 8.9505897  | 88.2755143 |
| O  | 2.8356456  | 5.9648728  | 88.5126014 |
| C  | 4.2873978  | 5.9425822  | 85.9510183 |
| H  | 5.4313490  | 9.1930279  | 88.8911292 |
| H  | 3.9268197  | 9.8758026  | 88.1794337 |
| Zn | 2.6278346  | 4.9133688  | 86.3867463 |
| Br | 0.3225540  | 5.8806917  | 86.3870126 |
| C  | -0.1117856 | 0.8147848  | 88.9351193 |
| C  | 0.6562556  | -0.2660857 | 89.3825613 |
| C  | 0.0796761  | -1.1297175 | 90.3887862 |
| C  | 0.8139789  | -2.1617307 | 91.0475209 |
| C  | -1.2948880 | -0.9215472 | 90.7807186 |
| C  | -1.8914786 | -1.8018293 | 91.7325365 |
| C  | -2.0057911 | 0.2086871  | 90.2852377 |
| H  | -3.0245520 | 0.3997505  | 90.6559940 |
| C  | -1.4154052 | 1.1294262  | 89.4282276 |
| C  | 4.3275723  | 0.5528458  | 88.5871732 |
| C  | 4.8156402  | -0.7035175 | 88.2438977 |
| H  | 5.8867892  | -0.8201298 | 88.0188101 |
| C  | 3.9598209  | -1.8331058 | 88.1069119 |
| C  | 4.4627943  | -3.0878003 | 87.6483606 |
| C  | 2.5500994  | -1.6984066 | 88.3862304 |

|   |            |            |            |   |            |            |            |
|---|------------|------------|------------|---|------------|------------|------------|
| H | 9.2911638  | 4.3457700  | 87.3951447 | C | -1.1403834 | -0.8319919 | 90.7841995 |
| C | 6.4948166  | 3.3827308  | 87.2518690 | C | -1.7641872 | -1.6888351 | 91.7407758 |
| C | 9.0818451  | 5.0581749  | 88.2179533 | C | -1.8124755 | 0.3237127  | 90.2925541 |
| H | 9.7133991  | 5.9577850  | 88.0641125 | H | -2.8213914 | 0.5513481  | 90.6697103 |
| H | 6.9263655  | 3.7047903  | 86.2891315 | C | -1.1929623 | 1.2210689  | 89.4309484 |
| C | 4.0923087  | 3.2334933  | 91.7745185 | C | 4.5200974  | 0.4228671  | 88.5491171 |
| H | 5.7397823  | 1.3238271  | 92.9559323 | C | 4.9563939  | -0.8525258 | 88.2057683 |
| H | 6.6653247  | 0.8515729  | 91.4912790 | H | 6.0206282  | -1.0135067 | 87.9756551 |
| C | 5.4163166  | 2.5572668  | 89.7064269 | C | 4.0552381  | -1.9475396 | 88.0762037 |
| C | 4.8839917  | 2.3565470  | 84.8745222 | C | 4.5068402  | -3.2219330 | 87.6172190 |
| C | 5.7162726  | 2.2122463  | 87.2856964 | C | 2.6534587  | -1.7573284 | 88.3639932 |
| H | 7.1832666  | 0.0885175  | 86.2543569 | C | 1.7584657  | -2.8386240 | 88.1039769 |
| H | 7.5570526  | 1.5203608  | 85.2537894 | C | 2.2098637  | -0.4804103 | 88.8702706 |
| C | 4.9214959  | 2.1333160  | 91.0879087 | C | 3.1397483  | 0.5684547  | 88.8930488 |
| C | 5.1758348  | 1.7849589  | 88.5362156 | O | 0.6323268  | 1.6649756  | 87.9289603 |
| C | 5.4789347  | 1.4599000  | 85.9741724 | O | 2.7364243  | 1.8293948  | 89.3192148 |
| H | 3.2659914  | 3.5790429  | 91.1239185 | P | 1.8074002  | 2.7371569  | 88.3178174 |
| H | 3.9360662  | 2.8149402  | 85.2160691 | O | 1.3054768  | 3.8851408  | 89.1990746 |
| H | 4.7148452  | 4.1143742  | 92.0367975 | O | 2.5083148  | 3.0458347  | 86.9844495 |
| H | 6.2465292  | 6.7084315  | 89.4691062 | C | -1.0673014 | -2.7367645 | 92.3230462 |
| H | 5.5757564  | 3.1707994  | 84.5739289 | C | 0.2944658  | -2.9517936 | 91.9820422 |
| H | 9.3977367  | 4.5749454  | 89.1659850 | H | -2.8086642 | -1.4846377 | 92.0244362 |
| H | 4.2614038  | 1.2530675  | 90.9601448 | H | -1.5583214 | -3.3862314 | 93.0637348 |
| H | 4.7311304  | 0.6669504  | 86.1708578 | H | 1.9802484  | -2.3247283 | 90.7986432 |
| H | 6.3451210  | 4.3277533  | 90.5185670 | H | 0.8607684  | -3.7577861 | 92.4733137 |
| H | 4.4470790  | 6.2848747  | 84.9119504 | C | 2.2261691  | -4.0588360 | 87.6352861 |
| H | 5.0779180  | 5.2018333  | 86.2030112 | C | 3.6137281  | -4.2616091 | 87.4062041 |
| H | 5.4743841  | 8.7837975  | 86.1922618 | H | 0.6818875  | -2.6932673 | 88.2698176 |
| C | 14.5430723 | 18.3929914 | 78.3571583 | H | 1.5143260  | -4.8740626 | 87.4346992 |
| C | 13.3301899 | 18.0907685 | 78.9843955 | H | 3.9739962  | -5.2365374 | 87.0439911 |
| C | 12.6400022 | 19.0912114 | 79.7032404 | H | 5.5811485  | -3.3561509 | 87.4145289 |
| C | 13.1760079 | 20.3924456 | 79.7862226 | C | -1.7221729 | 3.5342938  | 90.2382640 |
| C | 14.3925069 | 20.6943127 | 79.1579240 | C | -1.7369970 | 2.5905614  | 89.1692164 |
| C | 15.0746947 | 19.6943279 | 78.4441765 | C | -2.1836731 | 4.8402207  | 89.9865600 |
| H | 15.0834757 | 17.6160227 | 77.7949004 | C | -2.1847755 | 2.9832171  | 87.8789303 |
| H | 12.8844392 | 17.0851171 | 78.9378983 | C | -2.6389750 | 4.3003033  | 87.6856203 |
| C | 11.3511699 | 18.7709584 | 80.3711184 | C | -2.6564117 | 5.2460419  | 88.7269420 |
| H | 12.6292265 | 21.1673694 | 80.3489033 | H | -2.1726313 | 5.5784951  | 90.8032446 |
| H | 14.8122615 | 21.7097094 | 79.2225437 | C | -2.2320536 | 1.9987855  | 86.7125950 |
| H | 16.0299746 | 19.9298336 | 77.9497888 | H | -2.9981856 | 4.5949831  | 86.6867386 |
| O | 10.8135179 | 17.6762828 | 80.3581627 | C | -1.4441962 | 2.5008118  | 85.4902017 |
| H | 10.8826806 | 19.6476819 | 80.9160934 | H | -1.8901338 | 3.4246648  | 85.0668274 |
|   |            |            |            | H | -1.4432493 | 1.7337227  | 84.6881366 |
|   |            |            |            | H | -0.3932308 | 2.7252951  | 85.7565602 |
|   |            |            |            | C | -3.6884477 | 1.6561713  | 86.3455584 |
|   |            |            |            | H | -1.7533436 | 1.0565794  | 87.0499845 |
|   |            |            |            | H | -4.2361681 | 2.5549917  | 85.9921069 |
|   |            |            |            | H | -4.2382286 | 1.2504238  | 87.2191822 |
|   |            |            |            | H | -3.7236456 | 0.8994145  | 85.5343161 |
|   |            |            |            | C | -3.2236838 | 6.6468525  | 88.5292846 |
|   |            |            |            | C | -2.5207963 | 7.4278460  | 87.4081670 |
|   |            |            |            | H | -2.9625040 | 8.4405265  | 87.3036220 |
|   |            |            |            | H | -2.6172840 | 6.9171039  | 86.4273652 |
|   |            |            |            | H | -1.4414670 | 7.5462800  | 87.6263170 |
|   |            |            |            | C | -4.7464332 | 6.5857485  | 88.3033155 |
|   |            |            |            | H | -3.0422797 | 7.1984993  | 89.4773067 |
|   |            |            |            | H | -5.1766591 | 7.6062704  | 88.2296931 |
|   |            |            |            | H | -5.2568188 | 6.0547035  | 89.1323980 |
|   |            |            |            | H | -4.9887318 | 6.0493099  | 87.3615977 |
|   |            |            |            | C | -1.2381540 | 3.1900511  | 91.6490470 |
|   |            |            |            | C | -0.1753302 | 4.1669034  | 92.1813710 |
|   |            |            |            | H | 0.1689070  | 3.8425234  | 93.1853416 |
|   |            |            |            | H | -0.5618097 | 5.2017152  | 92.2788060 |
|   |            |            |            | H | 0.7024930  | 4.1995996  | 91.5084906 |
|   |            |            |            | C | -2.4306758 | 3.0889838  | 92.6199293 |
|   |            |            |            | H | -0.7586841 | 2.1920553  | 91.6094706 |
|   |            |            |            | H | -2.0905352 | 2.7859796  | 93.6320876 |
|   |            |            |            | H | -3.1798301 | 2.3482425  | 92.2735281 |
|   |            |            |            | H | -2.9489898 | 4.0662291  | 92.7155381 |
|   |            |            |            | H | 7.7109946  | 5.6500233  | 87.2442802 |
|   |            |            |            | H | 7.0982614  | 2.2866440  | 92.1011722 |

### agg-7-j-mi; COSMO

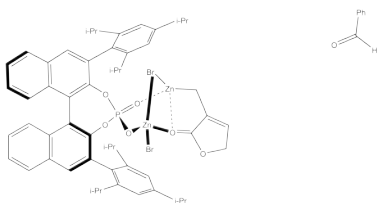

Energy (Hartree)= -11970.01891972

|    |           |            |            |
|----|-----------|------------|------------|
| Zn | 1.0608789 | 5.7978075  | 88.8467122 |
| Br | 0.4443828 | 7.5467833  | 90.2281598 |
| C  | 5.3675932 | 8.1392661  | 86.9318708 |
| C  | 4.7698045 | 6.9146782  | 86.8924892 |
| C  | 4.0194401 | 6.8096890  | 88.1642321 |
| O  | 4.2154130 | 7.8747552  | 88.9474598 |
| C  | 5.0553942 | 8.8085417  | 88.2300953 |
| O  | 3.2433590 | 5.8853640  | 88.4755400 |
| C  | 4.6880627 | 5.8133241  | 85.9027871 |
| H  | 5.9542568 | 9.0187266  | 88.8503393 |
| H  | 4.4830386 | 9.7561466  | 88.1259186 |
| Zn | 3.0023811 | 4.8270632  | 86.3250610 |
| Br | 0.7297597 | 5.9185878  | 86.3691265 |
| C  | 0.0946721 | 0.8579169  | 88.9293001 |
| C  | 0.8247833 | -0.2506576 | 89.3721256 |
| C  | 0.2232187 | -1.0912455 | 90.3836507 |
| C  | 0.9231917 | -2.1492468 | 91.0391933 |



|   |            |            |            |    |            |            |            |
|---|------------|------------|------------|----|------------|------------|------------|
| H | 6.7389305  | -0.0415612 | 84.5232384 | O  | 3.2366093  | 5.8879525  | 88.4813279 |
| C | 7.9632256  | 5.1710642  | 88.2179058 | C  | 4.6706038  | 5.8078105  | 85.9115069 |
| H | 3.9544892  | 2.7491963  | 92.6819113 | H  | 5.9576668  | 9.0135945  | 88.8419465 |
| H | 8.3218338  | 7.1403165  | 89.0927824 | H  | 4.4760855  | 9.7531449  | 88.1387989 |
| H | 4.8899307  | 1.6092816  | 83.9228878 | Zn | 2.9734074  | 4.8457351  | 86.3566281 |
| C | 7.0614125  | 3.9463349  | 88.3398215 | Br | 0.7076669  | 5.9000534  | 86.3714749 |
| C | 6.3543481  | 1.4817223  | 91.9235271 | C  | 0.0974132  | 0.8556014  | 88.9271952 |
| C | 7.7462326  | 6.2193399  | 89.3175496 | C  | 0.8260241  | -0.2535285 | 89.3713255 |
| H | 8.0914339  | 5.8541892  | 90.3071598 | C  | 0.2228057  | -1.0933736 | 90.3821002 |
| C | 6.5000958  | 3.5321826  | 89.5574216 | C  | 0.9206741  | -2.1524336 | 91.0375630 |
| C | 6.9547922  | 0.5413167  | 85.4425321 | C  | -1.1402691 | -0.8319723 | 90.7821261 |
| H | 9.6222822  | 4.0274806  | 87.3257559 | C  | -1.7646952 | -1.6878931 | 91.7383165 |
| C | 6.7904193  | 3.1653057  | 87.2012385 | C  | -1.8100131 | 0.3245149  | 90.2898531 |
| C | 9.4436681  | 4.7451552  | 88.1514971 | H  | -2.8183835 | 0.5550069  | 90.6665381 |
| H | 10.1049685 | 5.6225490  | 87.9945206 | C  | -1.1898758 | 1.2209919  | 89.4281800 |
| H | 7.2292075  | 3.4701961  | 86.2362904 | C  | 4.5212932  | 0.4224013  | 88.5527758 |
| C | 4.4050170  | 3.1108310  | 91.7347722 | C  | 4.9586529  | -0.8522498 | 88.2087432 |
| H | 5.9830269  | 1.1418987  | 92.9126026 | H  | 6.0232504  | -1.0104798 | 87.9780307 |
| H | 6.8849365  | 0.6332533  | 91.4452925 | C  | 4.0590330  | -1.9480862 | 88.0781424 |
| C | 5.6932538  | 2.3827567  | 89.6621302 | C  | 4.5104680  | -3.2216848 | 87.6181016 |
| C | 5.1376684  | 2.2000535  | 84.8284640 | C  | 2.6572420  | -1.7587208 | 88.3655514 |
| C | 5.9667419  | 2.0259719  | 87.2395828 | C  | 1.7630825  | -2.8401250 | 88.1044070 |
| H | 7.3410017  | -0.1594205 | 86.2102814 | C  | 2.2121787  | -0.4827690 | 88.8724503 |
| H | 7.7717723  | 1.2550597  | 85.2057508 | C  | 3.1408820  | 0.5670124  | 88.8971386 |
| C | 5.1890348  | 1.9788672  | 91.0463410 | O  | 0.6369339  | 1.6620788  | 87.9282615 |
| C | 5.4161451  | 1.6205492  | 88.4931623 | O  | 2.7370935  | 1.8269650  | 89.3240569 |
| C | 5.6951634  | 1.2818273  | 85.9300446 | P  | 1.8085482  | 2.7348360  | 88.3209268 |
| H | 3.5886992  | 3.4845227  | 91.0868586 | O  | 1.3048257  | 3.8820486  | 89.2019439 |
| H | 4.2112101  | 2.7020134  | 85.1686432 | O  | 2.5182262  | 3.0481677  | 86.9931932 |
| H | 5.0622803  | 3.9682556  | 91.9899625 | C  | -1.0702025 | -2.7368187 | 92.3204389 |
| H | 6.6776499  | 6.4961424  | 89.4209984 | C  | 0.2906056  | -2.9541149 | 91.9795784 |
| H | 5.8637673  | 2.9825107  | 84.5249049 | H  | -2.8086662 | -1.4813528 | 92.0219332 |
| H | 9.7482220  | 4.2507744  | 89.0977454 | H  | -1.5625126 | -3.3849417 | 93.0613574 |
| H | 4.4957772  | 1.1237325  | 90.9229319 | H  | 1.9773428  | -2.3288638 | 90.7964451 |
| H | 4.9153215  | 0.5209382  | 86.1295548 | H  | 0.8555864  | -3.7610862 | 92.4706484 |
| H | 6.6965151  | 4.1152817  | 90.4689896 | C  | 2.2312780  | -4.0593832 | 87.6351591 |
| H | 4.8418813  | 6.1633621  | 84.8649784 | C  | 3.6183239  | -4.2612357 | 87.4058562 |
| H | 5.4664290  | 5.0532147  | 86.1324308 | H  | 0.6868856  | -2.6940404 | 88.2713052 |
| H | 5.9907351  | 8.6008534  | 86.1534313 | H  | 1.5195856  | -4.8745825 | 87.4341674 |
| C | -5.0121961 | 6.3420103  | 70.6951359 | H  | 3.9791067  | -5.2356747 | 87.0429495 |
| C | -4.9260102 | 6.6810381  | 72.0495745 | H  | 5.5848113  | -3.3554182 | 87.4154003 |
| C | -5.0808938 | 8.0268855  | 72.4506395 | C  | -1.7119771 | 3.5368355  | 90.2328599 |
| C | -5.3225161 | 9.0255926  | 71.4841116 | C  | -1.7309279 | 2.5914784  | 89.1655002 |
| C | -5.4085214 | 8.6843946  | 70.1265869 | C  | -2.1680152 | 4.8441860  | 89.9787563 |
| C | -5.2532531 | 7.3434629  | 69.7336900 | C  | -2.1774563 | 2.9834126  | 87.8747113 |
| H | -4.8920734 | 5.2945157  | 70.3785916 | C  | -2.6275964 | 4.3014249  | 87.6797043 |
| H | -4.7385197 | 5.9233228  | 72.8260647 | C  | -2.6416967 | 5.2491067  | 88.7190529 |
| C | -4.9898482 | 8.3922722  | 73.8865045 | H  | -2.1538521 | 5.5841480  | 90.7936882 |
| H | -5.4422788 | 10.0732788 | 71.8061749 | C  | -2.2286464 | 1.9968811  | 86.7103027 |
| H | -5.5966590 | 9.4624427  | 69.3711374 | H  | -2.9869234 | 4.5953721  | 86.6806873 |
| H | -5.3205557 | 7.0742861  | 68.6681178 | C  | -1.4412853 | 2.4937074  | 85.4857285 |
| O | -4.7836400 | 7.6017404  | 74.7957147 | H  | -1.8816650 | 3.4202785  | 85.0627013 |
| H | -5.1294394 | 9.4959183  | 74.0937409 | H  | -1.4473208 | 1.7267596  | 84.6837121 |
|   |            |            |            | H  | -0.3878823 | 2.7103786  | 85.7481045 |
|   |            |            |            | C  | -3.6865540 | 1.6570929  | 86.3472318 |
|   |            |            |            | H  | -1.7515737 | 1.0542697  | 87.0489928 |
|   |            |            |            | H  | -4.2333991 | 2.5563081  | 85.9938353 |
|   |            |            |            | H  | -4.2356224 | 1.2547409  | 87.2226389 |
|   |            |            |            | H  | -3.7260181 | 0.8993185  | 85.5372046 |
|   |            |            |            | C  | -3.2106926 | 6.6493911  | 88.5220000 |
|   |            |            |            | C  | -2.5146539 | 7.4319111  | 87.3979586 |
|   |            |            |            | H  | -2.9647783 | 8.4404091  | 87.2900579 |
|   |            |            |            | H  | -2.6064694 | 6.9181707  | 86.4183169 |
|   |            |            |            | H  | -1.4370682 | 7.5628928  | 87.6168476 |
|   |            |            |            | C  | -4.7343338 | 6.5844291  | 88.3036359 |
|   |            |            |            | H  | -3.0250910 | 7.2022525  | 89.4683989 |
|   |            |            |            | H  | -5.1678556 | 7.6036941  | 88.2330292 |
|   |            |            |            | H  | -5.2395730 | 6.0506400  | 89.1338418 |
|   |            |            |            | H  | -4.9806305 | 6.0484126  | 87.3628405 |
|   |            |            |            | C  | -1.2317672 | 3.1930219  | 91.6450262 |
|   |            |            |            | C  | -0.1690608 | 4.1682057  | 92.1804844 |

### agg-7-j-mi

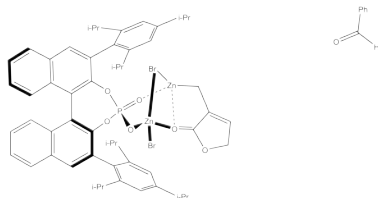

Energy (Hartree)= -11970.00302823

|    |           |           |            |
|----|-----------|-----------|------------|
| Zn | 0.9977782 | 5.7871658 | 88.8611385 |
| Br | 0.4265712 | 7.5572391 | 90.2188992 |
| C  | 5.3522236 | 8.1395952 | 86.9269574 |
| C  | 4.7586163 | 6.9136695 | 86.8924638 |
| C  | 4.0141272 | 6.8072283 | 88.1716487 |
| O  | 4.2217670 | 7.8714412 | 88.9557639 |
| C  | 5.0506881 | 8.8052476 | 88.2320424 |

|   |            |            |            |
|---|------------|------------|------------|
| H | 0.1665468  | 3.8477096  | 93.1884645 |
| H | -0.5492526 | 5.2059307  | 92.2698243 |
| H | 0.7150203  | 4.1933299  | 91.5156530 |
| C | -2.4281814 | 3.0951709  | 92.6114221 |
| H | -0.7544155 | 2.1938395  | 91.6080689 |
| H | -2.0932084 | 2.7912717  | 93.6249257 |
| H | -3.1786846 | 2.3571831  | 92.2622504 |
| H | -2.9447217 | 4.0733536  | 92.7049415 |
| H | 7.7120192  | 5.6490777  | 87.2425911 |
| H | 7.1021686  | 2.2851607  | 92.0997532 |
| H | 6.7342765  | -0.0361383 | 84.5200223 |
| C | 7.9635821  | 5.1703158  | 88.2166950 |
| H | 3.9559087  | 2.7499154  | 92.6847699 |
| H | 8.3279417  | 7.1395244  | 89.0903361 |
| H | 4.8759051  | 1.6106025  | 83.9291204 |
| C | 7.0594518  | 3.9473318  | 88.3400074 |
| C | 6.3566148  | 1.4816411  | 91.9230286 |
| C | 7.7481989  | 6.2208183  | 89.3145370 |
| H | 8.0917188  | 5.8562730  | 90.3048341 |
| C | 6.4986028  | 3.5341678  | 89.5577426 |
| C | 6.9511454  | 0.5470673  | 85.4388038 |
| H | 9.6202305  | 4.0211506  | 87.3283455 |
| C | 6.7878965  | 3.1658948  | 87.2022106 |
| C | 9.4430750  | 4.7415801  | 88.1517314 |
| H | 10.1077506 | 5.6162602  | 87.9935557 |
| H | 7.2258465  | 3.4704198  | 86.2366435 |
| C | 4.4074660  | 3.1121993  | 91.7385639 |
| H | 5.9873883  | 1.1419797  | 92.9128509 |
| H | 6.8857446  | 0.6332368  | 91.4434643 |
| C | 5.6930581  | 2.3841159  | 89.6638342 |
| C | 5.1239473  | 2.1999645  | 84.8354438 |
| C | 5.9651047  | 2.0262103  | 87.2416862 |
| H | 7.3435732  | -0.1526287 | 86.2042039 |
| H | 7.7655758  | 1.2627356  | 85.1993932 |
| C | 5.1901765  | 1.9805183  | 91.0485090 |
| C | 5.4161217  | 1.6208986  | 88.4957257 |
| C | 5.6911672  | 1.2824086  | 85.9324723 |
| H | 3.5912970  | 3.4886100  | 91.0922367 |
| H | 4.1958288  | 2.6937962  | 85.1820930 |
| H | 5.0648204  | 3.9687124  | 91.9965127 |
| H | 6.6803018  | 6.5002589  | 89.4174151 |
| H | 5.8442166  | 2.9872267  | 84.5299902 |
| H | 9.7456917  | 4.2471990  | 89.0983534 |
| H | 4.4962420  | 1.1259877  | 90.9253026 |
| H | 4.9149177  | 0.5187211  | 86.1347013 |
| H | 6.6940992  | 4.1180067  | 90.4690026 |
| H | 4.8388811  | 6.1424464  | 84.8713009 |
| H | 5.4316924  | 5.0358830  | 86.1605612 |
| H | 5.9687065  | 8.6009870  | 86.1432804 |
| C | -5.0140909 | 6.3448218  | 70.6957641 |
| C | -4.9277318 | 6.6836416  | 72.0499558 |
| C | -5.0812535 | 8.0286804  | 72.4513936 |
| C | -5.3197963 | 9.0268684  | 71.4851106 |
| C | -5.4063543 | 8.6864217  | 70.1276503 |
| C | -5.2536827 | 7.3458287  | 69.7345019 |
| H | -4.8954930 | 5.2970796  | 70.3792415 |
| H | -4.7419481 | 5.9288128  | 72.8295510 |
| C | -4.9919701 | 8.3885452  | 73.8912321 |
| H | -5.4367053 | 10.0748020 | 71.8079240 |
| H | -5.5930784 | 9.4648058  | 69.3722432 |
| H | -5.3218183 | 7.0763732  | 68.6689916 |
| O | -4.7858043 | 7.5957260  | 74.7945545 |
| H | -5.1347440 | 9.4933352  | 74.1016574 |

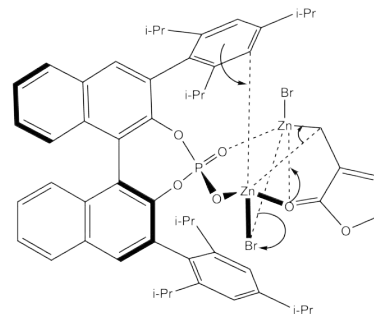

Energy (Hartree) = -11625.0703854

|    |            |            |            |
|----|------------|------------|------------|
| Zn | 1.6043875  | 1.4769200  | 2.0211921  |
| Br | 3.8650111  | 1.7657327  | 2.0062855  |
| C  | 1.8704952  | 6.0672279  | 1.4530647  |
| C  | 0.8836998  | 5.1289087  | 1.3069274  |
| C  | 1.0948031  | 4.1866887  | 2.4234353  |
| O  | 2.0682758  | 4.5998379  | 3.2444441  |
| C  | 2.6751776  | 5.7743274  | 2.6730493  |
| O  | 0.5482323  | 3.0750880  | 2.6021135  |
| C  | -0.1826442 | 4.9731873  | 0.3109644  |
| H  | 3.7373617  | 5.5137885  | 2.4649737  |
| H  | 2.6624917  | 6.5866322  | 3.4327653  |
| Zn | -0.6087656 | 3.3415058  | -0.8004040 |
| Br | -2.2623237 | 3.5831439  | -2.4374102 |
| C  | -1.9895437 | -1.5783220 | 0.3710503  |
| C  | -1.6958999 | -2.6807547 | -0.4354275 |
| C  | -2.0044119 | -3.9930009 | 0.0863014  |
| C  | -1.6159036 | -5.2012988 | -0.5666295 |
| C  | -2.7029487 | -4.0954377 | 1.3464089  |
| C  | -3.0477730 | -5.3855273 | 1.8497038  |
| C  | -2.9821332 | -2.9188232 | 2.1000400  |
| H  | -3.4820573 | -3.0210712 | 3.0749769  |
| C  | -2.5877924 | -1.6587519 | 1.6685314  |
| C  | 1.0136232  | -1.6410811 | -2.9589460 |
| C  | 0.5864707  | -2.3049455 | -4.1033978 |
| H  | 1.2122749  | -2.2702679 | -5.0082559 |
| C  | -0.6629439 | -2.9872227 | -4.1558868 |
| C  | -1.1300231 | -3.5784216 | -5.3679788 |
| C  | -1.4893594 | -3.0606574 | -2.9741474 |
| C  | -2.7741133 | -3.6718365 | -3.0833381 |
| C  | -1.0015172 | -2.4893616 | -1.7423804 |
| C  | 0.1856767  | -1.7494526 | -1.8005200 |
| O  | -1.6823737 | -0.3012270 | -0.1107889 |
| O  | 0.6610442  | -1.1229054 | -0.6504799 |
| P  | -0.1214172 | 0.1576269  | -0.0135529 |
| O  | 0.3405158  | 0.1811692  | 1.4650209  |
| O  | 0.0545597  | 1.4491243  | -0.8095590 |
| C  | -2.6879727 | -6.5382754 | 1.1690642  |
| C  | -1.9496401 | -6.4412468 | -0.0394724 |
| H  | -3.5924633 | -5.4464334 | 2.8050179  |
| H  | -2.9556968 | -7.5267076 | 1.5723700  |
| H  | -1.0360539 | -5.1448937 | -1.4975310 |
| H  | -1.6333614 | -7.3566561 | -0.5623707 |
| C  | -3.2057504 | -4.2204859 | -4.2827448 |
| C  | -2.3731026 | -4.1886262 | -5.4326633 |
| H  | -3.4309619 | -3.6943520 | -2.2024881 |
| H  | -4.2050933 | -4.6776737 | -4.3437585 |
| H  | -2.7234395 | -4.6328472 | -6.3767022 |
| H  | -0.4860474 | -3.5238330 | -6.2597447 |
| C  | -1.7769175 | -0.2727885 | 3.6225633  |
| C  | -2.6582020 | -0.4227558 | 2.5102052  |
| C  | -1.7401140 | 0.9666881  | 4.2829228  |
| C  | -3.5039147 | 0.6511715  | 2.1248583  |
| C  | -3.4163110 | 1.8741425  | 2.8159387  |
| C  | -2.5251348 | 2.0625178  | 3.8839471  |
| H  | -1.0485406 | 1.1021094  | 5.1303422  |

## 7.5 Interconversion of Complexes 13

### 7.5.1 Pathway 13d-ma ↔ 13d-mi

TS1-dma-dmi; COSMO

|   |            |            |            |
|---|------------|------------|------------|
| C | -4.5462395 | 0.4926565  | 1.0205192  |
| H | -4.0668706 | 2.7030928  | 2.4988916  |
| C | -4.4528661 | 1.5821545  | -0.0570552 |
| H | -4.6757188 | 2.5918399  | 0.3465182  |
| H | -5.1818933 | 1.3917855  | -0.8708528 |
| H | -3.4484269 | 1.6201584  | -0.5187884 |
| C | -5.9575399 | 0.4199024  | 1.6359620  |
| H | -4.3625107 | -0.4815546 | 0.5221292  |
| H | -6.2153912 | 1.3656152  | 2.1572290  |
| H | -6.0348775 | -0.4022348 | 2.3763535  |
| H | -6.7211629 | 0.2497502  | 0.8489378  |
| C | -2.4140858 | 3.3827436  | 4.6373846  |
| C | -2.6391457 | 4.6168731  | 3.7533460  |
| H | -2.4233678 | 5.5470702  | 4.3174044  |
| H | -3.6888794 | 4.6886228  | 3.4008815  |
| H | -1.9855616 | 4.5944896  | 2.8583230  |
| C | -3.3596302 | 3.3911136  | 5.8547018  |
| H | -1.3707096 | 3.4338265  | 5.0216485  |
| H | -3.2427165 | 4.3221654  | 6.4477855  |
| H | -3.1637185 | 2.5288798  | 6.5232334  |
| H | -4.4181512 | 3.3249957  | 5.5266210  |
| C | -0.8950789 | -1.4139040 | 4.1332803  |
| C | 0.5402460  | -0.9955792 | 4.4955609  |
| H | 1.1284065  | -1.8796927 | 4.8152863  |
| H | 0.5728612  | -0.2657981 | 5.3304851  |
| H | 1.0630457  | -0.5568704 | 3.6233184  |
| C | -1.5645364 | -2.0952540 | 5.3444850  |
| H | -0.8142232 | -2.1657182 | 3.3223036  |
| H | -0.9746891 | -2.9710800 | 5.6862415  |
| H | -2.5887767 | -2.4434912 | 5.1048883  |
| H | -1.6500944 | -1.3871488 | 6.1952248  |
| H | 5.6459529  | 2.5775509  | -3.2373328 |
| H | 5.3657285  | -3.1382458 | -1.7337432 |
| H | 0.7615429  | 1.0453725  | -6.7104096 |
| C | 5.8665679  | 1.6414427  | -2.6776752 |
| H | 3.4518719  | -3.1866843 | 0.8392402  |
| H | 7.1025254  | 2.7201147  | -1.2236594 |
| H | -0.0307378 | 2.6406150  | -4.8661717 |
| C | 4.6096033  | 0.7837804  | -2.7465672 |
| C | 4.3248959  | -3.5181811 | -1.8014120 |
| C | 6.2292452  | 2.0354081  | -1.2361362 |
| H | 6.4969872  | 1.1480425  | -0.6258318 |
| C | 4.4852266  | -0.3964465 | -1.9933158 |
| C | 1.6023791  | 0.7221774  | -6.0626519 |
| H | 6.7980399  | 0.7040462  | -4.4376167 |
| C | 3.5399590  | 1.1396149  | -3.5808908 |
| C | 7.0462146  | 0.9478742  | -3.3850849 |
| H | 7.9487727  | 1.5939951  | -3.3826721 |
| H | 3.6209449  | 2.0658469  | -4.1729121 |
| C | 3.5543706  | -2.2431475 | 0.2643988  |
| H | 4.2776039  | -4.4736446 | -1.2386197 |
| H | 4.1176190  | -3.7363663 | -2.8686462 |
| C | 3.3405155  | -1.2079465 | -2.0543800 |
| C | 0.8321244  | 2.3213048  | -4.2482671 |
| C | 2.3617309  | 0.3735961  | -3.6721158 |
| H | 1.8504892  | -0.3279928 | -6.3194058 |
| H | 2.4861224  | 1.3420790  | -6.3223849 |
| C | 3.3187656  | -2.4980572 | -1.2351708 |
| C | 2.2643476  | -0.8212312 | -2.9050497 |
| C | 1.2350045  | 0.8746433  | -4.5747789 |
| H | 2.8225201  | -1.5161358 | 0.6658974  |
| H | 0.5167447  | 2.4108147  | -3.1921297 |
| H | 4.5701362  | -1.8426280 | 0.4618583  |
| H | 5.3823875  | 2.5365457  | -0.7260269 |
| H | 1.6594471  | 3.0384878  | -4.4297850 |
| H | 7.3103442  | -0.0024334 | -2.8751736 |
| H | 2.3136421  | -2.9540883 | -1.3371231 |
| H | 0.3415374  | 0.2469136  | -4.3844883 |
| H | 5.3120347  | -0.7000159 | -1.3321019 |
| H | -1.1692719 | 5.0145114  | 0.8289302  |
| H | -0.1712820 | 5.8080019  | -0.4173237 |

H 2.0639790 6.9211102 0.7897179

### TS1-dma-dmi

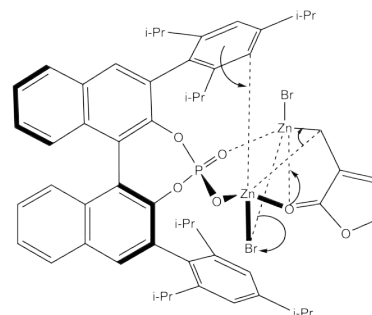

Energy (Hartree) = -11625.05780991  
number of imaginary frequencies: 3

|    |            |            |            |
|----|------------|------------|------------|
| Zn | 1.6047122  | 1.4753400  | 2.0223212  |
| Br | 3.8658090  | 1.7609451  | 2.0080787  |
| C  | 1.8743493  | 6.0658790  | 1.4507657  |
| C  | 0.8866498  | 5.1284152  | 1.3054007  |
| C  | 1.0974651  | 4.1862086  | 2.4218541  |
| O  | 2.0717613  | 4.5985523  | 3.2422181  |
| C  | 2.6794315  | 5.7725175  | 2.6703072  |
| O  | 0.5498064  | 3.0751010  | 2.6009883  |
| C  | -0.1805419 | 4.9735147  | 0.3101211  |
| H  | 3.7412934  | 5.5111562  | 2.4616992  |
| H  | 2.6677913  | 6.5849463  | 3.4298728  |
| Zn | -0.6080361 | 3.3416953  | -0.8003745 |
| Br | -2.2626217 | 3.5832503  | -2.4366693 |
| C  | -1.9901926 | -1.5785779 | 0.3710856  |
| C  | -1.6963739 | -2.6809260 | -0.4354346 |
| C  | -2.0047532 | -3.9932462 | 0.0862165  |
| C  | -1.6160349 | -5.2014874 | -0.5667293 |
| C  | -2.7033325 | -4.0958221 | 1.3463054  |
| C  | -3.0480228 | -5.3859804 | 1.8495802  |
| C  | -2.9826744 | -2.9192781 | 2.1000110  |
| H  | -3.4826002 | -3.0216450 | 3.0749354  |
| C  | -2.5884464 | -1.6591489 | 1.6685430  |
| C  | 1.0134147  | -1.6409695 | -2.9585574 |
| C  | 0.5864943  | -2.3048997 | -4.1030774 |
| H  | 1.2124184  | -2.2702178 | -5.0078552 |
| C  | -0.6628756 | -2.9872656 | -4.1557389 |
| C  | -1.1297103 | -3.5784996 | -5.3679355 |
| C  | -1.4894810 | -3.0607280 | -2.9741276 |
| C  | -2.7742067 | -3.6719692 | -3.0835174 |
| C  | -1.0018432 | -2.4894025 | -1.7422863 |
| C  | 0.1853192  | -1.7494066 | -1.8002097 |
| O  | -1.6830900 | -0.3013626 | -0.1106253 |
| O  | 0.6604213  | -1.1229550 | -0.6500058 |
| P  | -0.1221384 | 0.1575403  | -0.0130371 |
| O  | 0.3396881  | 0.1809338  | 1.4655375  |
| O  | 0.0542334  | 1.4489712  | -0.8090661 |
| C  | -2.6880185 | -6.5386801 | 1.1689082  |
| C  | -1.9496232 | -6.4415179 | -0.0396136 |
| H  | -3.5927525 | -5.4469842 | 2.8048666  |
| H  | -2.9556218 | -7.5271638 | 1.5721730  |
| H  | -1.0361279 | -5.1450051 | -1.4975938 |
| H  | -1.6331822 | -7.3568721 | -0.5625160 |
| C  | -3.2056356 | -4.2206566 | -4.2830087 |
| C  | -2.3727805 | -4.1887691 | -5.4328136 |
| H  | -3.4312131 | -3.6945143 | -2.2027793 |
| H  | -4.2049493 | -4.6778937 | -4.3441828 |

|   |            |            |            |
|---|------------|------------|------------|
| H | -2.7229436 | -4.6330222 | -6.3769045 |
| H | -0.4855826 | -3.5239031 | -6.2595933 |
| C | -1.7773719 | -0.2732445 | 3.6224794  |
| C | -2.6588257 | -0.4231893 | 2.5102516  |
| C | -1.7402922 | 0.9663166  | 4.2827055  |
| C | -3.5045080 | 0.6507783  | 2.1249504  |
| C | -3.4166608 | 1.8738260  | 2.8158727  |
| C | -2.5252296 | 2.0622215  | 3.8836903  |
| H | -1.0485919 | 1.1017326  | 5.1300215  |
| C | -4.5470365 | 0.4922029  | 1.0208055  |
| H | -4.0671944 | 2.7028203  | 2.4988749  |
| C | -4.4537991 | 1.5816255  | -0.0568423 |
| H | -4.6765298 | 2.5913367  | 0.3467413  |
| H | -5.1829871 | 1.3912229  | -0.8705099 |
| H | -3.4493930 | 1.6195514  | -0.5186703 |
| C | -5.9582576 | 0.4195664  | 1.6364472  |
| H | -4.3634273 | -0.4820476 | 0.5224463  |
| H | -6.2159828 | 1.3653424  | 2.1576738  |
| H | -6.0355136 | -0.4025206 | 2.3769107  |
| H | -6.7220023 | 0.2493699  | 0.8495421  |
| C | -2.4137988 | 3.3825965  | 4.6367969  |
| C | -2.6387111 | 4.6165219  | 3.7524342  |
| H | -2.4226561 | 5.5468216  | 4.3162137  |
| H | -3.6884757 | 4.6883788  | 3.4000612  |
| H | -1.9851986 | 4.5937300  | 2.8573616  |
| C | -3.3592131 | 3.3914703  | 5.8542152  |
| H | -1.3703752 | 3.4335517  | 5.0209273  |
| H | -3.2420225 | 4.3226585  | 6.4470273  |
| H | -3.1633968 | 2.5293733  | 6.5229688  |
| H | -4.4177938 | 3.3255095  | 5.5262604  |
| C | -0.8956162 | -1.4144516 | 4.1331255  |
| C | 0.5398251  | -0.9963451 | 4.4951685  |
| H | 1.1278728  | -1.8805513 | 4.8148581  |
| H | 0.5726894  | -0.2665035 | 5.3300268  |
| H | 1.0626097  | -0.5577917 | 3.6228361  |
| C | -1.5650232 | -2.0956609 | 5.3444426  |
| H | -0.8149963 | -2.1663164 | 3.3221740  |
| H | -0.9752478 | -2.9715577 | 5.6861421  |
| H | -2.5893489 | -2.4437687 | 5.1049804  |
| H | -1.6503481 | -1.3875050 | 6.1951717  |
| H | 5.6444553  | 2.5791311  | -3.2365160 |
| H | 5.3659666  | -3.1366891 | -1.7327259 |
| H | 0.7616453  | 1.0448986  | -6.7105785 |
| C | 5.8653042  | 1.6431992  | -2.6766660 |
| H | 3.4517897  | -3.1858613 | 0.8399242  |
| H | 7.1004243  | 2.7225958  | -1.2224981 |
| H | -0.0316116 | 2.6400922  | -4.8667607 |
| C | 4.6087016  | 0.7850168  | -2.7457623 |
| C | 4.3252785  | -3.5170061 | -1.8005714 |
| C | 6.2274393  | 2.0375131  | -1.2350864 |
| H | 6.4953895  | 1.1503349  | -0.6245926 |
| C | 4.4845845  | -0.3952278 | -1.9924532 |
| C | 1.6023984  | 0.7220318  | -6.0625410 |
| H | 6.7976591  | 0.7059613  | -4.4362329 |
| C | 3.5391069  | 1.1404003  | -3.5803647 |
| C | 7.0454382  | 0.9500242  | -3.3836521 |
| H | 7.9477063  | 1.5965489  | -3.3810795 |
| H | 3.6199077  | 2.0665946  | -4.1724805 |
| C | 3.5540204  | -2.2422669 | 0.2651233  |
| H | 4.2782280  | -4.4724838 | -1.2377816 |
| H | 4.1182347  | -3.7352737 | -2.8678437 |
| C | 3.3401371  | -1.2071345 | -2.0536937 |
| C | 0.8311512  | 2.3210967  | -4.2485320 |
| C | 2.3611553  | 0.3739540  | -3.6717457 |
| H | 1.8508971  | -0.3280960 | -6.3191067 |
| H | 2.4860238  | 1.3421987  | -6.3220635 |
| C | 3.3186950  | -2.4972424 | -1.2344749 |
| C | 2.2639649  | -0.8208323 | -2.9045722 |
| C | 1.2345301  | 0.8745183  | -4.5747888 |
| H | 2.8218557  | -1.5155251 | 0.6665450  |
| H | 0.5154586  | 2.4106179  | -3.1924777 |

|   |            |            |            |
|---|------------|------------|------------|
| H | 4.5696209  | -1.8413791 | 0.4627020  |
| H | 5.3802375  | 2.5383697  | -0.7252593 |
| H | 1.6583194  | 3.0384975  | -4.4298795 |
| H | 7.3098445  | -0.0000975 | -2.8735212 |
| H | 2.3137409  | -2.9536157 | -1.3365745 |
| H | 0.3412108  | 0.2465204  | -4.3846949 |
| H | 5.3113716  | -0.6984729 | -1.3310629 |
| H | -1.1668493 | 5.0159033  | 0.8286288  |
| H | -0.1687644 | 5.8081182  | -0.4184126 |
| H | 2.0682771  | 6.9194491  | 0.7871404  |

## TS2-dma-dmi; COSMO

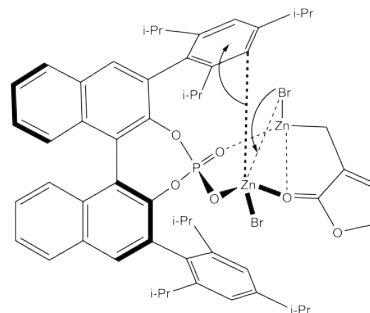

Energy (Hartree) = -11625.093002

|    |            |            |            |
|----|------------|------------|------------|
| Zn | 2.4097082  | 0.5180607  | 2.1700913  |
| Br | 4.6925084  | 0.5401065  | 2.6122846  |
| C  | 2.4396885  | 5.8581582  | 1.5950083  |
| C  | 1.7280498  | 4.8032504  | 1.0969475  |
| C  | 2.4611828  | 3.6017988  | 1.5506210  |
| O  | 3.5630265  | 3.9092066  | 2.2332766  |
| C  | 3.6313444  | 5.3520859  | 2.3401912  |
| O  | 2.0684020  | 2.4297511  | 1.3769730  |
| C  | 0.4515035  | 4.6273678  | 0.3859629  |
| H  | 4.6060989  | 5.6844541  | 1.9210005  |
| H  | 3.6260533  | 5.5986532  | 3.4247237  |
| Zn | -0.3856420 | 3.0634447  | 1.3482592  |
| Br | -0.3574677 | 2.5750515  | 3.6693466  |
| C  | -1.3106367 | -2.3598995 | 0.7110270  |
| C  | -1.7567679 | -2.8273421 | -0.5288657 |
| C  | -1.6792188 | -4.2501173 | -0.7779742 |
| C  | -1.9529146 | -4.8357366 | -2.0509333 |
| C  | -1.2692313 | -5.1264763 | 0.2957540  |
| C  | -1.2445235 | -6.5368784 | 0.0773480  |
| C  | -0.7991979 | -4.5702993 | 1.5213349  |
| H  | -0.3993174 | -5.2461888 | 2.2933291  |
| C  | -0.7398387 | -3.1974017 | 1.7204231  |
| C  | -1.6378217 | 0.1643313  | -2.9389947 |
| C  | -2.7675714 | -0.0696864 | -3.7157431 |
| H  | -2.9823344 | 0.5947329  | -4.5663165 |
| C  | -3.6942570 | -1.1059608 | -3.4065108 |
| C  | -4.9027641 | -1.2599263 | -4.1511620 |
| C  | -3.4350995 | -1.9868025 | -2.2927131 |
| C  | -4.4407542 | -2.9339034 | -1.9327528 |
| C  | -2.1929278 | -1.8535707 | -1.5700648 |
| C  | -1.3714554 | -0.7595037 | -1.8801358 |
| O  | -1.4194068 | -1.0038476 | 1.0024286  |
| O  | -0.1963952 | -0.5598787 | -1.1604062 |
| P  | -0.3243747 | 0.0415050  | 0.3643373  |
| O  | 1.0740647  | -0.1644465 | 0.9594662  |
| O  | -0.9897899 | 1.4153039  | 0.3931285  |
| C  | -1.5634751 | -7.0741553 | -1.1607704 |
| C  | -1.8989860 | -6.2108565 | -2.2370740 |
| H  | -0.9435507 | -7.1909558 | 0.9108127  |
| H  | -1.5344297 | -8.1632489 | -1.3171384 |
| H  | -2.2034621 | -4.1845212 | -2.8989035 |

|   |            |            |            |
|---|------------|------------|------------|
| H | -2.1126001 | -6.6330476 | -3.2309349 |
| C | -5.6158847 | -3.0436844 | -2.6637791 |
| C | -5.8443101 | -2.2134312 | -3.7939514 |
| H | -4.2804882 | -3.5762339 | -1.0555761 |
| H | -6.3791089 | -3.7766273 | -2.3606537 |
| H | -6.7755878 | -2.3161148 | -4.3715681 |
| H | -5.0811362 | -0.5896429 | -5.0067377 |
| C | 1.4845782  | -2.6168920 | 2.7066921  |
| C | 0.0670438  | -2.5414247 | 2.7947315  |
| C | 2.2516766  | -1.8390712 | 3.6026533  |
| C | -0.5498850 | -1.7187200 | 3.7801583  |
| C | 0.2566494  | -0.9522233 | 4.6381703  |
| C | 1.6653715  | -0.9971092 | 4.5753779  |
| H | 3.3493018  | -1.9227346 | 3.5799620  |
| C | -2.0646434 | -1.7322900 | 3.9665978  |
| H | -0.2261198 | -0.3178704 | 5.3965800  |
| C | -2.6946811 | -0.3331688 | 4.0167727  |
| H | -2.3544963 | 0.2465653  | 4.8990976  |
| H | -3.7993480 | -0.4159657 | 4.0782834  |
| H | -2.4356403 | 0.2573314  | 3.1177140  |
| C | -2.4242080 | -2.5609695 | 5.2162467  |
| H | -2.4989507 | -2.2604584 | 3.0926621  |
| H | -2.0147166 | -2.0923739 | 6.1357469  |
| H | -2.0145554 | -3.5896698 | 5.1518461  |
| H | -3.5251933 | -2.6343990 | 5.3344689  |
| C | 2.5459719  | -0.3120506 | 5.6160229  |
| C | 2.2848046  | 1.1930146  | 5.7601802  |
| H | 2.9624410  | 1.6292007  | 6.5224485  |
| H | 1.2414526  | 1.4116307  | 6.0653426  |
| H | 2.4640563  | 1.7300966  | 4.8060077  |
| C | 2.4121391  | -1.0382511 | 6.9689559  |
| H | 3.5946350  | -0.4318823 | 5.2682529  |
| H | 3.1104322  | -0.6060960 | 7.7151162  |
| H | 2.6372900  | -2.1195368 | 6.8712311  |
| H | 1.3825669  | -0.9429917 | 7.3733717  |
| C | 2.2241671  | -3.4919531 | 1.6942087  |
| C | 3.1751575  | -2.6897848 | 0.7881384  |
| H | 3.6774800  | -3.3669500 | 0.0670884  |
| H | 3.9687848  | -2.1689045 | 1.3633364  |
| C | 2.6167526  | -1.9279460 | 0.2099360  |
| C | 2.9601859  | -4.6399729 | 2.4113194  |
| H | 1.4693711  | -3.9540067 | 1.0295689  |
| H | 3.4423172  | -5.3144954 | 1.6740019  |
| H | 2.2644267  | -5.2450240 | 3.0281525  |
| H | 3.7552104  | -4.2548904 | 3.0836471  |
| H | 1.2274200  | 5.7376590  | -3.3023410 |
| H | 2.2616174  | 0.4237559  | -5.6658519 |
| H | -4.6045138 | 3.6228289  | -3.3908752 |
| C | 1.8314696  | 4.8524742  | -3.6008484 |
| H | 2.8226074  | -1.4985203 | -3.1370054 |
| H | 3.6695004  | 5.7135716  | -2.7687957 |
| H | -3.9058988 | 3.9296981  | -0.9593264 |
| C | 0.9323700  | 3.6324632  | -3.4415646 |
| C | 1.5077793  | -0.3183494 | -5.3287821 |
| C | 3.0571895  | 4.7931607  | -2.6714268 |
| H | 3.7113708  | 3.9309324  | -2.9174640 |
| C | 1.4206857  | 2.3319361  | -3.6567652 |
| C | -3.5407134 | 3.4870695  | -3.6764158 |
| H | 1.3686673  | 5.1281006  | -5.7340458 |
| C | -0.4177722 | 3.7702024  | -3.0817547 |
| C | 2.2522397  | 5.0488083  | -5.0690481 |
| H | 2.8588871  | 5.9704594  | -5.1884184 |
| H | -0.8138857 | 4.7841967  | -2.9099244 |
| C | 2.4695383  | -0.4592262 | -2.9744683 |
| H | 1.9036576  | -1.3293972 | -5.5588512 |
| H | 0.5903769  | -0.1626160 | -5.9322542 |
| C | 0.6095556  | 1.1926851  | -3.5168852 |
| C | -2.8449178 | 3.8382390  | -1.2694239 |
| C | -1.2739532 | 2.6643926  | -2.9127089 |
| H | -3.5060782 | 2.8189718  | -4.5604286 |
| H | -3.1461105 | 4.4751169  | -3.9939184 |

|   |            |            |            |
|---|------------|------------|------------|
| C | 1.2166876  | -0.1757220 | -3.8226392 |
| C | -0.7545403 | 1.3564076  | -3.1395365 |
| C | -2.7239671 | 2.9213077  | -2.4983942 |
| H | 2.2549611  | -0.3351089 | -1.8952442 |
| H | -2.2738418 | 3.4276454  | -0.4150145 |
| H | 3.3076105  | 0.2184855  | -3.2402622 |
| H | 2.7541415  | 4.6945347  | -1.6098172 |
| H | -2.4685744 | 4.8628113  | -1.4686879 |
| H | 2.8653577  | 4.1946398  | -5.4257987 |
| H | 0.4648125  | -0.9488745 | -3.5681258 |
| H | -3.1700564 | 1.9478418  | -2.2134309 |
| H | 2.4740300  | 2.1963069  | -3.9498103 |
| H | -0.1266880 | 5.5630926  | 0.2830987  |
| H | 0.6075924  | 4.1772609  | -0.6187632 |
| H | 2.1995379  | 6.9257054  | 1.4997324  |

## TS2-dma-dmi

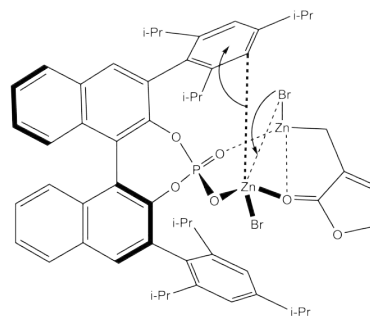

Energy (Hartree)= -11625.08156703  
number of imaginary frequencies: 1

|    |            |            |            |
|----|------------|------------|------------|
| Zn | 2.4258488  | 0.5076644  | 2.1620886  |
| Br | 4.6978523  | 0.5252627  | 2.6273468  |
| C  | 2.4498079  | 5.8516167  | 1.6020017  |
| C  | 1.7436706  | 4.7982904  | 1.0935818  |
| C  | 2.4758710  | 3.5944147  | 1.5487277  |
| O  | 3.5728840  | 3.9021245  | 2.2409867  |
| C  | 3.6365044  | 5.3418051  | 2.3555263  |
| O  | 2.0847599  | 2.4251712  | 1.3696641  |
| C  | 0.4725785  | 4.6205312  | 0.3776017  |
| H  | 4.6154056  | 5.6781977  | 1.9479824  |
| H  | 3.6206121  | 5.5814663  | 3.4420161  |
| Zn | -0.3652285 | 3.0595643  | 1.3488599  |
| Br | -0.3556230 | 2.5826174  | 3.6646143  |
| C  | -1.3021367 | -2.3589650 | 0.7074316  |
| C  | -1.7493446 | -2.8279271 | -0.5316215 |
| C  | -1.6767639 | -4.2512971 | -0.7780071 |
| C  | -1.9520802 | -4.8382074 | -2.0497552 |
| C  | -1.2710569 | -5.1271570 | 0.2974056  |
| C  | -1.2520437 | -6.5374743 | 0.0810035  |
| C  | -0.8009108 | -4.5698988 | 1.5220949  |
| H  | -0.4044513 | -5.2451084 | 2.2964902  |
| C  | -0.7363814 | -3.1971789 | 1.7193309  |
| C  | -1.6331074 | 0.1629503  | -2.9426046 |
| C  | -2.7643705 | -0.0709817 | -3.7167057 |
| H  | -2.9804339 | 0.5948435  | -4.5658401 |
| C  | -3.6903387 | -1.1070827 | -3.4064675 |
| C  | -4.9003426 | -1.2613054 | -4.1477422 |
| C  | -3.4285095 | -1.9876855 | -2.2934656 |
| C  | -4.4334886 | -2.9343294 | -1.9313590 |
| C  | -2.1847545 | -1.8549758 | -1.5735683 |
| C  | -1.3632705 | -0.7614080 | -1.8850713 |
| O  | -1.4057383 | -1.0032362 | 0.9964038  |
| O  | -0.1866013 | -0.5622538 | -1.1687723 |
| P  | -0.3096307 | 0.0396091  | 0.3571257  |
| O  | 1.0890990  | -0.1714028 | 0.9504349  |

|   |            |            |            |   |            |            |            |
|---|------------|------------|------------|---|------------|------------|------------|
| O | -0.9686934 | 1.4159057  | 0.3872665  | H | 0.5851807  | -0.1489995 | -5.9421132 |
| C | -1.5724488 | -7.0758501 | -1.1556764 | C | 0.6094678  | 1.1990267  | -3.5239163 |
| C | -1.9038350 | -6.2134625 | -2.2332149 | C | -2.8486159 | 3.8228315  | -1.2570021 |
| H | -0.9540212 | -7.1911450 | 0.9158460  | C | -1.2764562 | 2.6630872  | -2.9099754 |
| H | -1.5476912 | -8.1653205 | -1.3097898 | H | -3.5109552 | 2.8190479  | -4.5525498 |
| H | -2.1997315 | -4.1868702 | -2.8983948 | H | -3.1564212 | 4.4728590  | -3.9793825 |
| H | -2.1188947 | -6.6364463 | -3.2263692 | C | 1.2191731  | -0.1668910 | -3.8349919 |
| C | -5.6098969 | -3.0440784 | -2.6594788 | C | -0.7536962 | 1.3576887  | -3.1424870 |
| C | -5.8409232 | -2.2142907 | -3.7887361 | C | -2.7264140 | 2.9136015  | -2.4912669 |
| H | -4.2705236 | -3.5761946 | -1.0545188 | H | 2.2641734  | -0.3300074 | -1.9111328 |
| H | -6.3723418 | -3.7769047 | -2.3543280 | H | -2.2761489 | 3.4065303  | -0.4065058 |
| H | -6.7734930 | -2.3167241 | -4.3642084 | H | 3.3114431  | 0.2293463  | -3.2572700 |
| H | -5.0806346 | -0.5907493 | -5.0026989 | H | 2.7536493  | 4.7094127  | -1.6218447 |
| C | 1.4854356  | -2.6233153 | 2.7155014  | H | -2.4762059 | 4.8501731  | -1.4495018 |
| C | 0.0677882  | -2.5429871 | 2.7964402  | H | 2.8430451  | 4.2092892  | -5.4388827 |
| C | 2.2504223  | -1.8465634 | 3.6136321  | H | 0.4696286  | -0.9421220 | -3.5799562 |
| C | -0.5514295 | -1.7166934 | 3.7771555  | H | -3.1685856 | 1.9373452  | -2.2101284 |
| C | 0.2537584  | -0.9514775 | 4.6373646  | H | 2.4690339  | 2.2092196  | -3.9598500 |
| C | 1.6622622  | -1.0011930 | 4.5816293  | H | -0.1053543 | 5.5551822  | 0.2657640  |
| C | 3.3480639  | -1.9304764 | 3.5940212  | H | 0.6315625  | 4.1602760  | -0.6219690 |
| C | -2.0672054 | -1.7240031 | 3.9560662  | H | 2.2074730  | 6.9187778  | 1.5094553  |
| H | -0.2307228 | -0.3124843 | 5.3907515  |   |            |            |            |
| C | -2.6929035 | -0.3227440 | 3.9997484  |   |            |            |            |
| H | -2.3562832 | 0.2591151  | 4.8818926  |   |            |            |            |
| H | -3.7980578 | -0.4016997 | 4.0558214  |   |            |            |            |
| H | -2.4287682 | 0.2652212  | 3.1007921  |   |            |            |            |
| C | -2.4353012 | -2.5492424 | 5.2054377  |   |            |            |            |
| H | -2.4987623 | -2.2527718 | 3.0810744  |   |            |            |            |
| H | -2.0286210 | -2.0807001 | 6.1260863  |   |            |            |            |
| H | -2.0286757 | -3.5793076 | 5.1454860  |   |            |            |            |
| H | -3.5369417 | -2.6188799 | 5.3193965  |   |            |            |            |
| C | 2.5404977  | -0.3135784 | 5.6225104  |   |            |            |            |
| C | 2.2818781  | 1.1925959  | 5.7590325  |   |            |            |            |
| H | 2.9580674  | 1.6307634  | 6.5214300  |   |            |            |            |
| H | 1.2382747  | 1.4165265  | 6.0592435  |   |            |            |            |
| H | 2.4667850  | 1.7246839  | 4.8035104  |   |            |            |            |
| C | 2.4008502  | -1.0342294 | 6.9776998  |   |            |            |            |
| H | 3.5899686  | -0.4355551 | 5.2777965  |   |            |            |            |
| H | 3.0970835  | -0.6009257 | 7.7251167  |   |            |            |            |
| H | 2.6237823  | -2.1163340 | 6.8852469  |   |            |            |            |
| H | 1.3702560  | -0.9361684 | 7.3786480  |   |            |            |            |
| C | 2.2271178  | -3.5018018 | 1.7073267  |   |            |            |            |
| C | 3.1841816  | -2.7036733 | 0.8040631  |   |            |            |            |
| H | 3.6875747  | -3.3830008 | 0.0858127  |   |            |            |            |
| H | 3.9769628  | -2.1829377 | 1.3804430  |   |            |            |            |
| H | 2.6299658  | -1.9419565 | 0.2218644  |   |            |            |            |
| C | 2.9569317  | -4.6504864 | 2.4295120  |   |            |            |            |
| H | 1.4738714  | -3.9631817 | 1.0403241  |   |            |            |            |
| H | 3.4410466  | -5.3278737 | 1.6961504  |   |            |            |            |
| H | 2.2574864  | -5.2526246 | 3.0449648  |   |            |            |            |
| H | 3.7498681  | -4.2666739 | 3.1047919  |   |            |            |            |
| H | 1.2126175  | 5.7455378  | -3.3049422 |   |            |            |            |
| H | 2.2553936  | 0.4400555  | -5.6809781 |   |            |            |            |
| H | -4.6108760 | 3.6131520  | -3.3780223 |   |            |            |            |
| C | 1.8185121  | 4.8627248  | -3.6072929 |   |            |            |            |
| H | 2.8299496  | -1.4881859 | -3.1577185 |   |            |            |            |
| H | 3.6580499  | 5.7319722  | -2.7862336 |   |            |            |            |
| H | -3.9091481 | 3.9088937  | -0.9441640 |   |            |            |            |
| C | 0.9247687  | 3.6393193  | -3.4433539 |   |            |            |            |
| C | 1.5048904  | -0.3046452 | -5.3425019 |   |            |            |            |
| C | 3.0498324  | 4.8092450  | -2.6851158 |   |            |            |            |
| H | 3.7064684  | 3.9499604  | -2.9344730 |   |            |            |            |
| C | 1.4162585  | 2.3410983  | -3.6631818 |   |            |            |            |
| C | -3.5469232 | 3.4822749  | -3.6651045 |   |            |            |            |
| H | 1.3413831  | 5.1356995  | -5.7373146 |   |            |            |            |
| C | -0.4241947 | 3.7716766  | -3.0781608 |   |            |            |            |
| C | 2.2292620  | 5.0609901  | -5.0779320 |   |            |            |            |
| H | 2.8315464  | 5.9848353  | -5.2020829 |   |            |            |            |
| H | -0.8229603 | 4.7839684  | -2.9022349 |   |            |            |            |
| C | 2.4749993  | -0.4502748 | -2.9913879 |   |            |            |            |
| H | 1.9024081  | -1.3138764 | -5.5773017 |   |            |            |            |

### int-dma-dmi; COSMO

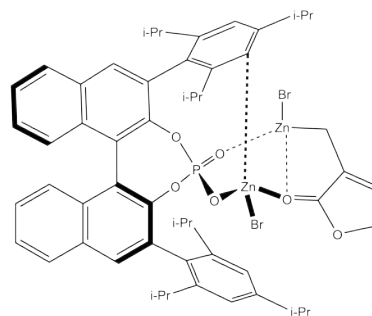

Energy (Hartree) = -11625.10260872

|    |            |            |            |
|----|------------|------------|------------|
| Zn | 2.8775263  | -0.4287284 | 1.5164407  |
| Br | 5.1737923  | -0.1663599 | 1.0941152  |
| C  | 3.9310289  | 4.4967366  | 2.2324814  |
| C  | 2.9813582  | 3.6709655  | 1.6974712  |
| C  | 3.1224735  | 2.4005343  | 2.4326679  |
| O  | 4.1198214  | 2.4373042  | 3.3168205  |
| C  | 4.7034122  | 3.7604038  | 3.2765871  |
| O  | 2.3797895  | 1.4007768  | 2.3119795  |
| C  | 1.9157713  | 3.8000527  | 0.6919589  |
| H  | 5.7838559  | 3.6509078  | 3.0371046  |
| H  | 4.6204951  | 4.1867489  | 4.3004174  |
| Zn | 0.3063488  | 2.9162637  | 1.5222852  |
| Br | -0.7592818 | 3.1278677  | 3.6049037  |
| C  | -1.1813585 | -2.3553448 | 0.3975802  |
| C  | -1.9074504 | -2.6421526 | -0.7631621 |
| C  | -2.0045909 | -4.0269337 | -1.1642443 |
| C  | -2.5663331 | -4.4339944 | -2.4116328 |
| C  | -1.4829649 | -5.0505192 | -0.2870929 |
| C  | -1.6225113 | -6.4226879 | -0.6550371 |
| C  | -0.7700181 | -4.6802795 | 0.8914534  |
| H  | -0.3361606 | -5.4734459 | 1.5198515  |
| C  | -0.5510917 | -3.3480404 | 1.2147746  |
| C  | -2.1893387 | 0.7111451  | -2.6318291 |
| C  | -3.4930394 | 0.6511825  | -3.1097250 |
| H  | -3.8823368 | 1.4809279  | -3.7194521 |
| C  | -4.3691196 | -0.4207815 | -2.7726960 |
| C  | -5.7324429 | -0.4134322 | -3.1964907 |
| C  | -3.8951217 | -1.4986125 | -1.9360390 |
| C  | -4.8407870 | -2.4742886 | -1.4976064 |
| C  | -2.5039806 | -1.5215736 | -1.5469884 |
| C  | -1.7148714 | -0.4139918 | -1.8866144 |

|   |            |            |            |   |            |            |            |
|---|------------|------------|------------|---|------------|------------|------------|
| O | -1.0691739 | -1.0404307 | 0.8222534  | H | 1.5931406  | 7.1666547  | -4.1775006 |
| O | -0.3748131 | -0.3930089 | -1.5121705 | H | -1.0155639 | 5.1212650  | -1.5636356 |
| P | -0.0084898 | -0.0392671 | 0.0490316  | C | 1.6818614  | 0.1059194  | -3.9956104 |
| O | 1.4472941  | -0.5119724 | 0.1910634  | H | 0.3600340  | 0.0155711  | -6.4440132 |
| O | -0.4142107 | 1.3641274  | 0.4650715  | H | -0.8990163 | 1.2476286  | -6.0926965 |
| C | -2.2104807 | -6.7835076 | -1.8582151 | C | -0.1073331 | 1.8585710  | -3.5155388 |
| C | -2.6670019 | -5.7768789 | -2.7499568 | C | -2.7618182 | 3.7730734  | 0.1578838  |
| H | -1.2329789 | -7.1920406 | 0.0301677  | C | -1.6564005 | 3.1115122  | -2.0633338 |
| H | -2.3052543 | -7.8451776 | -2.1324766 | H | -4.1168747 | 3.8131207  | -3.0818735 |
| H | -2.9164411 | -3.6671890 | -3.1161338 | H | -3.5236389 | 5.2152804  | -2.1450886 |
| H | -3.0999945 | -6.0619825 | -3.7209420 | C | 0.2760047  | 0.6294605  | -4.3374249 |
| C | -6.1656443 | -2.4270166 | -1.9104396 | C | -1.3161335 | 1.9192715  | -2.7686317 |
| C | -6.6147807 | -1.4002041 | -2.7830121 | C | -2.9616812 | 3.2718466  | -1.2814040 |
| H | -4.5136122 | -3.2685810 | -0.8128688 | H | 1.7762208  | -0.1013653 | -2.9117225 |
| H | -6.8744352 | -3.1891151 | -1.5520419 | H | -2.1857979 | 3.0429362  | 0.7578139  |
| H | -7.6650471 | -1.3781225 | -3.1114962 | H | 2.4714597  | 0.8328969  | -4.2787397 |
| H | -6.0752142 | 0.4078636  | -3.8453833 | H | 3.0888292  | 4.4507268  | -1.9684507 |
| C | 1.8101747  | -3.0255627 | 2.0265994  | H | -2.2428923 | 4.7530500  | 0.2012792  |
| C | 0.4145092  | -2.8559328 | 2.2464455  | H | 1.1977889  | 5.6629806  | -5.0754995 |
| C | 2.7206022  | -2.3088882 | 2.8539627  | H | -0.4442513 | -0.1782875 | -4.0959859 |
| C | -0.0412129 | -2.0541609 | 3.3318512  | H | -3.4367666 | 2.2739582  | -1.2040569 |
| C | 0.8935243  | -1.3727680 | 4.1334218  | H | 1.6692257  | 2.9264848  | -4.1275500 |
| C | 2.2775537  | -1.4705805 | 3.9188960  | H | 1.7894838  | 4.8341283  | 0.3236112  |
| H | 3.8005448  | -2.5154301 | 2.7598954  | H | 2.1022390  | 3.1262756  | -0.1730386 |
| C | -1.5223083 | -1.9593567 | 3.6782173  | H | 4.1404827  | 5.5381218  | 1.9530292  |
| H | 0.5218811  | -0.7385293 | 4.9490631  |   |            |            |            |
| C | -2.0006015 | -0.5193421 | 3.9159951  |   |            |            |            |
| H | -1.5591311 | -0.0755634 | 4.8316598  |   |            |            |            |
| H | -3.1020240 | -0.5015571 | 4.0436642  |   |            |            |            |
| H | -1.7396219 | 0.1439176  | 3.0697602  |   |            |            |            |
| C | -1.8209207 | -2.8677490 | 4.8888907  |   |            |            |            |
| H | -2.0933082 | -2.3669610 | 2.8198079  |   |            |            |            |
| H | -1.2715740 | -2.5240022 | 5.7903694  |   |            |            |            |
| H | -1.5255706 | -3.9184823 | 4.6920616  |   |            |            |            |
| H | -2.9046005 | -2.8520077 | 5.1254872  |   |            |            |            |
| C | 3.3004619  | -0.7740673 | 4.8099360  |   |            |            |            |
| C | 2.7221828  | 0.3994168  | 5.6097925  |   |            |            |            |
| H | 3.5407932  | 0.9674679  | 6.0939530  |   |            |            |            |
| H | 2.0431593  | 0.0487491  | 6.4149935  |   |            |            |            |
| H | 2.1552889  | 1.0977586  | 4.9633540  |   |            |            |            |
| C | 3.9792862  | -1.8019317 | 5.7384948  |   |            |            |            |
| H | 4.0872920  | -0.3700180 | 4.1323174  |   |            |            |            |
| H | 4.7646762  | -1.3117043 | 6.3489620  |   |            |            |            |
| H | 4.4560775  | -2.6236379 | 5.1673710  |   |            |            |            |
| H | 3.2382495  | -2.2534338 | 6.4307835  |   |            |            |            |
| C | 2.3672726  | -3.9696321 | 0.9645051  |   |            |            |            |
| C | 3.4023736  | -3.3235199 | 0.0317591  |   |            |            |            |
| H | 3.7206324  | -4.0535314 | -0.7398319 |   |            |            |            |
| H | 4.3155546  | -2.9887477 | 0.5645069  |   |            |            |            |
| H | 2.9707989  | -2.4478163 | -0.4937399 |   |            |            |            |
| C | 2.9287242  | -5.2349747 | 1.6436680  |   |            |            |            |
| H | 1.5199797  | -4.2850456 | 0.3264568  |   |            |            |            |
| H | 3.2683929  | -5.9644077 | 0.8803588  |   |            |            |            |
| H | 2.1667399  | -5.7303403 | 2.2794903  |   |            |            |            |
| H | 3.7981908  | -4.9921028 | 2.2898262  |   |            |            |            |
| H | 1.0949534  | 6.0068516  | -2.0066335 |   |            |            |            |
| H | 0.8258762  | 1.7244190  | -6.1658844 |   |            |            |            |
| H | -4.9098289 | 4.2557825  | -1.5323557 |   |            |            |            |
| C | 1.3352806  | 5.3916545  | -2.9026921 |   |            |            |            |
| H | 1.8891208  | -0.8348422 | -4.5463541 |   |            |            |            |
| H | 3.4336024  | 5.9999005  | -2.8081263 |   |            |            |            |
| H | -3.7406967 | 3.9019014  | 0.6636193  |   |            |            |            |
| C | 0.4391219  | 4.1601678  | -2.8374225 |   |            |            |            |
| C | 0.1310628  | 0.9205844  | -5.8436428 |   |            |            |            |
| C | 2.8359311  | 5.0665328  | -2.8544569 |   |            |            |            |
| H | 3.1661763  | 4.5140501  | -3.7586183 |   |            |            |            |
| C | 0.7404528  | 2.9806896  | -3.5390769 |   |            |            |            |
| C | -3.9327279 | 4.1870925  | -2.0540515 |   |            |            |            |
| H | -0.0820305 | 6.5159269  | -4.1585207 |   |            |            |            |
| C | -0.7648850 | 4.1994105  | -2.1138865 |   |            |            |            |
| C | 0.9903875  | 6.2350104  | -4.1466352 |   |            |            |            |
| H | 1.5931406  | 7.1666547  | -4.1775006 |   |            |            |            |
| H | -1.0155639 | 5.1212650  | -1.5636356 |   |            |            |            |
| C | 1.6818614  | 0.1059194  | -3.9956104 |   |            |            |            |
| H | 0.3600340  | 0.0155711  | -6.4440132 |   |            |            |            |
| H | -0.8990163 | 1.2476286  | -6.0926965 |   |            |            |            |
| C | -0.1073331 | 1.8585710  | -3.5155388 |   |            |            |            |
| C | -2.7618182 | 3.7730734  | 0.1578838  |   |            |            |            |
| C | -1.6564005 | 3.1115122  | -2.0633338 |   |            |            |            |
| H | -4.1168747 | 3.8131207  | -3.0818735 |   |            |            |            |
| H | -3.5236389 | 5.2152804  | -2.1450886 |   |            |            |            |
| C | 0.2760047  | 0.6294605  | -4.3374249 |   |            |            |            |
| C | -1.3161335 | 1.9192715  | -2.7686317 |   |            |            |            |
| C | -2.9616812 | 3.2718466  | -1.2814040 |   |            |            |            |
| H | 1.7762208  | -0.1013653 | -2.9117225 |   |            |            |            |
| H | -2.1857979 | 3.0429362  | 0.7578139  |   |            |            |            |
| H | 2.4714597  | 0.8328969  | -4.2787397 |   |            |            |            |
| H | 3.0888292  | 4.4507268  | -1.9684507 |   |            |            |            |
| H | -2.2428923 | 4.7530500  | 0.2012792  |   |            |            |            |
| H | 1.1977889  | 5.6629806  | -5.0754995 |   |            |            |            |
| H | -0.4442513 | -0.1782875 | -4.0959859 |   |            |            |            |
| H | -3.4367666 | 2.2739582  | -1.2040569 |   |            |            |            |
| H | 1.6692257  | 2.9264848  | -4.1275500 |   |            |            |            |
| H | 1.7894838  | 4.8341283  | 0.3236112  |   |            |            |            |
| H | 2.1022390  | 3.1262756  | -0.1730386 |   |            |            |            |
| H | 4.1404827  | 5.5381218  | 1.9530292  |   |            |            |            |

### int-dma-dmi



Energy (Hartree) = -11625.09088273

|    |            |            |            |
|----|------------|------------|------------|
| Zn | 2.9023289  | -0.4354724 | 1.4888830  |
| Br | 5.2027791  | -0.2099491 | 1.1341840  |
| C  | 3.8628945  | 4.5433043  | 2.2578319  |
| C  | 2.9260640  | 3.7123636  | 1.7081324  |
| C  | 3.1133924  | 2.4194431  | 2.3966936  |
| O  | 4.1256293  | 2.4524594  | 3.2658851  |
| C  | 4.6721753  | 3.7894854  | 3.2631603  |
| O  | 2.3933054  | 1.4095566  | 2.2544335  |
| C  | 1.8365361  | 3.8452833  | 0.7334022  |
| H  | 5.7515669  | 3.7160148  | 3.0036444  |
| H  | 4.5951180  | 4.1753300  | 4.3040725  |
| Zn | 0.2732329  | 2.8942616  | 1.5926463  |
| Br | -0.7248580 | 3.0179916  | 3.7004748  |
| C  | -1.1758972 | -2.3644959 | 0.3922604  |
| C  | -1.9052824 | -2.6456843 | -0.7678385 |
| C  | -2.0057349 | -4.0284135 | -1.1745024 |
| C  | -2.5729191 | -4.4290004 | -2.4212512 |
| C  | -1.4830949 | -5.0568320 | -0.3039080 |
| C  | -1.6268064 | -6.4263778 | -0.6781119 |
| C  | -0.7679319 | -4.6925420 | 0.8749213  |
| H  | -0.3358709 | -5.4888394 | 1.5008580  |
| C  | -0.5464466 | -3.3624794 | 1.2047114  |
| C  | -2.1872111 | 0.7185099  | -2.6160481 |
| C  | -3.4934961 | 0.6651826  | -3.0867698 |
| H  | -3.8825254 | 1.5004803  | -3.6890446 |
| C  | -4.3707001 | -0.4064636 | -2.7529118 |
| C  | -5.7356605 | -0.3935577 | -3.1695603 |
| C  | -3.8947955 | -1.4916616 | -1.9272254 |

|   |            |            |            |
|---|------------|------------|------------|
| C | -4.8403419 | -2.4689705 | -1.4929147 |
| C | -2.5022610 | -1.5200477 | -1.5440337 |
| C | -1.7119442 | -0.4118378 | -1.8792177 |
| O | -1.0610440 | -1.0528260 | 0.8216111  |
| O | -0.3714049 | -0.3947776 | -1.5099125 |
| P | 0.0012555  | -0.0492361 | 0.0523096  |
| O | 1.4540838  | -0.5326492 | 0.1884596  |
| O | -0.3953750 | 1.3539465  | 0.4743800  |
| C | -2.2194343 | -6.7809133 | -1.8802734 |
| C | -2.6776112 | -5.7697386 | -2.7650392 |
| H | -1.2366019 | -7.1995451 | 0.0024226  |
| H | -2.3172736 | -7.8411988 | -2.1586011 |
| H | -2.9247838 | -3.6574985 | -3.1195914 |
| H | -3.1152445 | -6.0495091 | -3.7354028 |
| C | -6.1664915 | -2.4161492 | -1.8994501 |
| C | -6.6178339 | -1.3816354 | -2.7607100 |
| H | -4.5105684 | -3.2691565 | -0.8165078 |
| H | -6.8748221 | -3.1800246 | -1.5440894 |
| H | -7.6695391 | -1.3545657 | -3.0840418 |
| H | -6.0797710 | 0.4340771  | -3.8095974 |
| C | 1.8120669  | -3.0424236 | 2.0303308  |
| C | 0.4154111  | -2.8726748 | 2.2406733  |
| C | 2.7157934  | -2.3148266 | 2.8543352  |
| C | -0.0477960 | -2.0644221 | 3.3184646  |
| C | 0.8805010  | -1.3658474 | 4.1118104  |
| C | 2.2659508  | -1.4607803 | 3.9027783  |
| H | 3.7972656  | -2.5145014 | 2.7642631  |
| C | -1.5299905 | -1.9865991 | 3.6655187  |
| H | 0.5025339  | -0.7192018 | 4.9147456  |
| C | -2.0312028 | -0.5544973 | 3.8993128  |
| H | -1.5943225 | -0.0968281 | 4.8100663  |
| H | -3.1322215 | -0.5537001 | 4.0308042  |
| H | -1.7850266 | 0.1096130  | 3.0498307  |
| C | -1.8125548 | -2.8961502 | 4.8792893  |
| H | -2.0953223 | -2.4064302 | 2.8090625  |
| H | -1.2676435 | -2.5405682 | 5.7787807  |
| H | -1.4999710 | -3.9426641 | 4.6867059  |
| H | -2.8957220 | -2.8975523 | 5.1186532  |
| C | 3.2829029  | -0.7438179 | 4.7850479  |
| C | 2.6947977  | 0.4355159  | 5.5690287  |
| H | 3.5089954  | 1.0190144  | 6.0422972  |
| H | 2.0224481  | 0.0907756  | 6.3824095  |
| H | 2.1157804  | 1.1193128  | 4.9176976  |
| C | 3.9706226  | -1.7524123 | 5.7277614  |
| H | 4.0672444  | -0.3429632 | 4.1024763  |
| H | 4.7526342  | -1.2481036 | 6.3310765  |
| H | 4.4541699  | -2.5783149 | 5.1686564  |
| H | 3.2346141  | -2.2010045 | 6.4273073  |
| C | 2.3781461  | -3.9923448 | 0.9775256  |
| C | 3.3727261  | -3.3318653 | 0.0106454  |
| H | 3.7040341  | -4.0668724 | -0.7508116 |
| H | 4.2826060  | -2.9513003 | 0.5179683  |
| H | 2.8999477  | -2.4845035 | -0.5253096 |
| C | 2.9915249  | -5.2261339 | 1.6687862  |
| H | 1.5286549  | -4.3467849 | 0.3633261  |
| H | 3.3383786  | -5.9609525 | 0.9138549  |
| H | 2.2581005  | -5.7311916 | 2.3302360  |
| H | 3.8667021  | -4.9466777 | 2.2919413  |
| H | 1.0967984  | 6.0242576  | -2.0566335 |
| H | 0.8018981  | 1.7188483  | -6.1764811 |
| H | -4.8755977 | 4.2738988  | -1.4760640 |
| C | 1.3627132  | 5.3769888  | -2.9224464 |
| H | 1.8592767  | -0.8508190 | -4.5704707 |
| H | 3.4646764  | 5.9691535  | -2.7809375 |
| H | -3.6839819 | 3.9236316  | 0.7032035  |
| C | 0.4563298  | 4.1536498  | -2.8460849 |
| C | 0.1040044  | 0.9197608  | -5.8495202 |
| C | 2.8577757  | 5.0408755  | -2.8076425 |
| H | 3.2132503  | 4.4462013  | -3.6745471 |
| C | 0.7439728  | 2.9725302  | -3.5505638 |
| C | -3.9043875 | 4.2014918  | -2.0080187 |

|   |            |            |            |
|---|------------|------------|------------|
| H | 0.0020412  | 6.4669488  | -4.2670668 |
| C | -0.7388086 | 4.1988687  | -2.1094846 |
| C | 1.0707438  | 6.1792056  | -4.2059562 |
| H | 1.6824775  | 7.1045166  | -4.2479265 |
| H | -0.9785884 | 5.1219657  | -1.5565053 |
| C | 1.6624988  | 0.0890496  | -4.0146298 |
| H | 0.3214003  | 0.0146125  | -6.4538524 |
| H | -0.9250020 | 1.2557832  | -6.0899870 |
| C | -0.1088630 | 1.8552582  | -3.5183249 |
| C | -2.7117110 | 3.7777717  | 0.1899163  |
| C | -1.6342407 | 3.1147497  | -2.0468927 |
| H | -4.1008978 | 3.8312416  | -3.0347686 |
| H | -3.4923634 | 5.2280574  | -2.1023695 |
| C | 0.2587162  | 0.6246978  | -4.3452372 |
| C | -1.3085979 | 1.9221075  | -2.7572571 |
| C | -2.9290185 | 3.2801550  | -1.2483044 |
| H | 1.7627060  | -0.1244954 | -2.9327537 |
| H | -2.1484811 | 3.0356374  | 0.7873894  |
| H | 2.4564605  | 0.8104237  | -4.2996303 |
| H | 3.0733080  | 4.4614537  | -1.8880812 |
| H | -2.1752535 | 4.7482438  | 0.2317414  |
| H | 1.3058516  | 5.5743526  | -5.1068134 |
| H | -0.4660259 | -0.1777039 | -4.0995127 |
| H | -3.4080676 | 2.2843940  | -1.1672765 |
| H | 1.6661962  | 2.9137077  | -4.1491007 |
| H | 1.6774545  | 4.8841972  | 0.3929560  |
| H | 2.0059568  | 3.1903265  | -0.1487340 |
| H | 4.0388523  | 5.5989269  | 2.0113222  |

## 7.5.2 Pathway 13j-ma ↔ 13d-ma

### TS1-jma-dma; COSMO

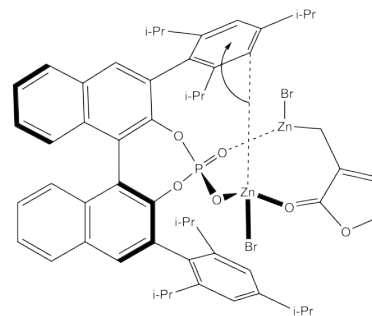

Energy (Hartree) = -11625.08150008

|    |            |            |            |
|----|------------|------------|------------|
| Zn | 2.0783431  | 1.1084939  | 2.1637319  |
| Br | 4.3332053  | 0.7375324  | 2.1648052  |
| H  | 2.3336499  | 6.5554247  | 2.0020080  |
| Br | -1.0011853 | 5.4876658  | -1.4580488 |
| H  | -2.1691980 | 4.3460697  | 2.0529449  |
| Zn | -0.9966177 | 3.5989336  | -0.0831854 |
| C  | 0.2597026  | 5.9269259  | 2.3113006  |
| C  | 1.6610231  | 6.1251671  | 2.7769844  |
| C  | -0.0518253 | 4.5920071  | 2.3441727  |
| C  | -1.2128730 | 3.8064839  | 1.9165772  |
| C  | 1.1661551  | 3.9251795  | 2.8351874  |
| O  | 2.1472511  | 4.7994589  | 3.0902893  |
| O  | 1.3212675  | 2.7046836  | 3.0365882  |
| H  | 1.7620518  | 6.7472079  | 3.6937338  |
| H  | -1.2446476 | 2.8229862  | 2.4205637  |
| H  | -0.3834226 | 6.7441374  | 1.9591287  |
| C  | -1.9521747 | -1.4166818 | 0.4278606  |
| C  | -1.9881242 | -2.2782664 | -0.6730358 |
| C  | -2.2444573 | -3.6811657 | -0.4220635 |
| C  | -2.1480278 | -4.6874992 | -1.4309683 |
| C  | -2.5719066 | -4.1028906 | 0.9205070  |



|   |            |            |            |   |            |            |            |
|---|------------|------------|------------|---|------------|------------|------------|
| C | -2.8767837 | -5.4747545 | 1.1713037  | C | 5.3561461  | 1.8604197  | -3.4138215 |
| C | -2.5000270 | -3.1660613 | 1.9909763  | H | 2.9286827  | -3.3401241 | -0.5527142 |
| H | -2.6766336 | -3.5183207 | 3.0190838  | H | 6.8002704  | 2.5491221  | -1.9120243 |
| C | -2.1294697 | -1.8444219 | 1.7806605  | H | -0.6343997 | 3.7443373  | -4.5336448 |
| C | 0.1625758  | -0.8527475 | -3.5046134 | C | 4.0211879  | 1.1317303  | -3.4967320 |
| C | -0.5600703 | -1.2527353 | -4.6230062 | C | 3.3627222  | -3.2428819 | -3.3259055 |
| H | -0.1268275 | -1.1084873 | -5.6245520 | C | 5.8701240  | 1.9463401  | -1.9652388 |
| C | -1.8675077 | -1.8097956 | -4.5116816 | H | 6.1019488  | 0.9415465  | -1.5548200 |
| C | -2.6445672 | -2.1104204 | -5.6708896 | C | 3.8710738  | -0.1685319 | -2.9826079 |
| C | -2.4256681 | -2.0702277 | -3.2056567 | C | 0.5962717  | 1.9251526  | -6.2777042 |
| C | -3.7580330 | -2.5744672 | -3.1241764 | H | 6.0460080  | 1.1923430  | -5.3937604 |
| C | -1.6310306 | -1.7872833 | -2.0352742 | C | 2.8972802  | 1.7375169  | -4.0785369 |
| C | -0.4285031 | -1.0947230 | -2.2264224 | C | 6.4034936  | 1.2213462  | -4.3445811 |
| O | -1.7501175 | -0.0526049 | 0.2148719  | H | 7.3568156  | 1.7892029  | -4.3196674 |
| O | 0.3141391  | -0.6873496 | -1.1230286 | H | 3.0010107  | 2.7544375  | -4.4908026 |
| P | -0.2482368 | 0.5008564  | -0.1478765 | C | 3.0709982  | -2.3217798 | -0.9700783 |
| O | 0.6742840  | 0.4314916  | 1.0722008  | H | 3.2809963  | -4.2799267 | -2.9388133 |
| O | -0.4391319 | 1.8409358  | -0.8615851 | H | 2.9764214  | -3.2315537 | -4.3654755 |
| C | -2.8193922 | -6.4165321 | 0.1553684  | C | 2.6405734  | -0.8444247 | -3.0000205 |
| C | -2.4298245 | -6.0179620 | -1.1505504 | C | 0.2801439  | 3.2585841  | -4.1365423 |
| H | -3.1387997 | -5.7737283 | 2.1984458  | C | 1.6371000  | 1.1080151  | -4.1233215 |
| H | -3.0510828 | -7.4722745 | 0.3629917  | H | 0.6723933  | 0.9139489  | -6.7276177 |
| H | -1.8365248 | -4.4054555 | -2.4449931 | H | 1.5062323  | 2.4881487  | -6.5744532 |
| H | -2.3431033 | -6.7703887 | -1.9492441 | C | 2.5835254  | -2.2617184 | -2.4294006 |
| C | -4.4943471 | -2.8376021 | -4.2713795 | C | 1.5044713  | -0.1944928 | -3.5670482 |
| C | -3.9309209 | -2.6169105 | -5.5568783 | C | 0.4621066  | 1.8602202  | -4.7447256 |
| H | -4.2042542 | -2.7428398 | -2.1334826 | H | 2.5133823  | -1.6067700 | -0.3358101 |
| H | -5.5246253 | -3.2149713 | -4.1835021 | H | 0.1759847  | 3.2064503  | -3.0366994 |
| H | -4.5213754 | -2.8357841 | -6.4595954 | H | 4.1498201  | -2.0762411 | -0.8842744 |
| H | -2.2052292 | -1.9168368 | -6.6621218 | H | 5.1186026  | 2.4067195  | -1.2923183 |
| C | -0.5236608 | -1.1003140 | 3.5664890  | H | 1.1325507  | 3.9317319  | -4.3647175 |
| C | -1.7670551 | -0.9119365 | 2.8928734  | H | 6.6257250  | 0.1778944  | -4.0364198 |
| C | -0.1203163 | -0.1357653 | 4.5073552  | H | 1.5260173  | -2.5948167 | -2.4374308 |
| C | -2.5877735 | 0.1990086  | 3.2103459  | H | -0.4608495 | 1.2912439  | -4.5142425 |
| C | -2.1516986 | 1.1173821  | 4.1867166  | H | 4.7429602  | -0.6716369 | -2.5354698 |
| C | -0.9129592 | 0.9827917  | 4.8342129  |   |            |            |            |
| H | 0.8401527  | -0.2698528 | 5.0344183  |   |            |            |            |
| C | -3.9519956 | 0.3865633  | 2.5507989  |   |            |            |            |
| H | -2.8016071 | 1.9694981  | 4.4345975  |   |            |            |            |
| C | -4.0990741 | 1.7488873  | 1.8534525  |   |            |            |            |
| H | -4.0459053 | 2.5905024  | 2.5745699  |   |            |            |            |
| H | -5.0784506 | 1.8154534  | 1.3369012  |   |            |            |            |
| H | -3.3023258 | 1.8939878  | 1.0977075  |   |            |            |            |
| C | -5.0816554 | 0.1470980  | 3.5704189  |   |            |            |            |
| H | -4.0506903 | -0.3940626 | 1.7684258  |   |            |            |            |
| H | -5.0437175 | 0.8895255  | 4.3950611  |   |            |            |            |
| H | -5.0063556 | -0.8621941 | 4.0236766  |   |            |            |            |
| H | -6.0755825 | 0.2337263  | 3.0845780  |   |            |            |            |
| C | -0.4224087 | 1.9551145  | 5.9020773  |   |            |            |            |
| C | -1.0688458 | 3.3441875  | 5.8344897  |   |            |            |            |
| H | -0.5800388 | 4.0320917  | 6.5535168  |   |            |            |            |
| H | -2.1459535 | 3.3081325  | 6.1011432  |   |            |            |            |
| H | -0.9893726 | 3.7881827  | 4.8226518  |   |            |            |            |
| C | -0.5955686 | 1.3399947  | 7.3057482  |   |            |            |            |
| H | 0.6687228  | 2.0837663  | 5.7229823  |   |            |            |            |
| H | -0.1779019 | 2.0088482  | 8.0865430  |   |            |            |            |
| H | -0.0869560 | 0.3583916  | 7.3869408  |   |            |            |            |
| H | -1.6710717 | 1.1801678  | 7.5304953  |   |            |            |            |
| C | 0.3547141  | -2.3329778 | 3.3426942  |   |            |            |            |
| C | 1.8192739  | -2.0021104 | 3.0218525  |   |            |            |            |
| H | 2.4298104  | -2.9261445 | 2.9609205  |   |            |            |            |
| H | 2.2968239  | -1.3614556 | 3.7932032  |   |            |            |            |
| H | 1.9053801  | -1.5010124 | 2.0379969  |   |            |            |            |
| C | 0.2509861  | -3.2765876 | 4.5577452  |   |            |            |            |
| H | -0.0438966 | -2.8802605 | 2.4661064  |   |            |            |            |
| H | 0.8197410  | -4.2123038 | 4.3789104  |   |            |            |            |
| H | -0.8027355 | -3.5492657 | 4.7702759  |   |            |            |            |
| H | 0.6610672  | -2.7987030 | 5.4721788  |   |            |            |            |
| H | 5.1786597  | 2.8985699  | -3.7718733 |   |            |            |            |
| H | 4.4410616  | -2.9819074 | -3.3656929 |   |            |            |            |
| H | -0.2791921 | 2.4375168  | -6.7279648 |   |            |            |            |

### TS1-jma-dma

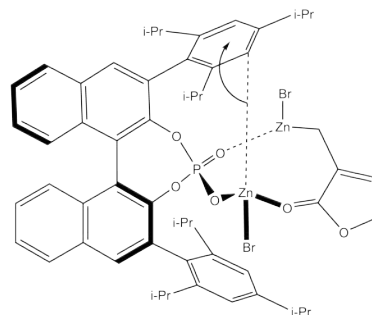

Energy (Hartree) = -11625.06627597  
number of imaginary frequencies: 3

|    |            |            |            |
|----|------------|------------|------------|
| Zn | 2.0948243  | 1.0890489  | 2.1555732  |
| Br | 4.3444612  | 0.7280639  | 2.1306760  |
| H  | 2.3539190  | 6.5233575  | 1.9437301  |
| Br | -0.9316180 | 5.4958995  | -1.4380348 |
| H  | -2.1584330 | 4.3364403  | 2.0431315  |
| Zn | -0.9736553 | 3.6011205  | -0.0911919 |
| C  | 0.2781750  | 5.9107152  | 2.2762516  |
| C  | 1.6849584  | 6.1055630  | 2.7292988  |
| C  | -0.0393744 | 4.5773899  | 2.3276282  |
| C  | -1.2034145 | 3.7942751  | 1.9107152  |
| C  | 1.1804139  | 3.9095549  | 2.8157283  |
| O  | 2.1678192  | 4.7831826  | 3.0540252  |
| O  | 1.3329064  | 2.6906670  | 3.0227349  |
| H  | 1.7977575  | 6.7376390  | 3.6384206  |
| H  | -1.2356825 | 2.8100877  | 2.4129683  |
| H  | -0.3629912 | 6.7243073  | 1.9128903  |
| C  | -1.9518060 | -1.4167968 | 0.4283414  |

|   |            |            |            |   |            |            |            |
|---|------------|------------|------------|---|------------|------------|------------|
| C | -1.9907338 | -2.2786427 | -0.6724710 | H | 0.6594850  | -2.7988982 | 5.4783607  |
| C | -2.2489427 | -3.6810831 | -0.4206538 | H | 5.1565453  | 2.9195666  | -3.7406455 |
| C | -2.1560036 | -4.6871065 | -1.4298595 | H | 4.4528646  | -2.9645117 | -3.3614514 |
| C | -2.5752352 | -4.1027286 | 0.9219682  | H | -0.2747955 | 2.4341902  | -6.7344623 |
| C | -2.8820630 | -5.4737641 | 1.1721557  | C | 5.3386632  | 1.8809140  | -3.3859639 |
| C | -2.5012163 | -3.1657192 | 1.9916627  | H | 2.9279157  | -3.3471762 | -0.5591945 |
| H | -2.6774122 | -3.5167376 | 3.0202872  | H | 6.7707655  | 2.5723094  | -1.8732850 |
| C | -2.1292641 | -1.8446916 | 1.7811871  | H | -0.6548309 | 3.7352500  | -4.5399134 |
| C | 0.1605465  | -0.8565833 | -3.5052531 | C | 4.0085623  | 1.1448157  | -3.4792065 |
| C | -0.5629978 | -1.2565981 | -4.6227936 | C | 3.3761696  | -3.2324894 | -3.3286650 |
| H | -0.1299398 | -1.1107402 | -5.6241496 | C | 5.8445129  | 1.9643924  | -1.9344946 |
| C | -1.8706423 | -1.8127805 | -4.5114103 | H | 6.0800491  | 0.9600294  | -1.5255439 |
| C | -2.6482313 | -2.1134789 | -5.6696670 | C | 3.8634034  | -0.1577872 | -2.9704647 |
| C | -2.4293040 | -2.0718111 | -3.2055123 | C | 0.5995529  | 1.9256106  | -6.2779704 |
| C | -3.7618433 | -2.5746324 | -3.1240894 | H | 6.0418816  | 1.2247536  | -5.3650514 |
| C | -1.6343392 | -1.7894351 | -2.0354493 | C | 2.8846467  | 1.7455795  | -4.0649688 |
| C | -0.4309245 | -1.0990095 | -2.2273256 | C | 6.3943682  | 1.2525059  | -4.3143620 |
| O | -1.7464575 | -0.0532431 | 0.2161889  | H | 7.3443648  | 1.8255582  | -4.2829325 |
| O | 0.3131256  | -0.6939213 | -1.1243909 | H | 2.9841797  | 2.7646283  | -4.4725963 |
| P | -0.2431388 | 0.4941397  | -0.1473801 | C | 3.0654151  | -2.3256155 | -0.9702751 |
| O | 0.6827431  | 0.4176018  | 1.0712582  | H | 3.2993675  | -4.2720588 | -2.9474390 |
| O | -0.4239180 | 1.8372638  | -0.8575995 | H | 2.9964046  | -3.2181458 | -4.3703818 |
| C | -2.8280498 | -6.4149965 | 0.1563065  | C | 2.6372737  | -0.8404511 | -2.9962262 |
| C | -2.4399039 | -6.0166450 | -1.1494681 | C | 0.2584762  | 3.2528350  | -4.1364650 |
| H | -3.1430443 | -5.7725704 | 2.1995971  | C | 1.6284049  | 1.1098370  | -4.1186306 |
| H | -3.0614031 | -7.4703019 | 0.3639877  | H | 0.6857789  | 0.9159878  | -6.7296899 |
| H | -1.8456075 | -4.4044879 | -2.4439483 | H | 1.5085945  | 2.4938449  | -6.5668439 |
| H | -2.3558697 | -6.7687385 | -1.9486661 | C | 2.5857099  | -2.2606378 | -2.4320466 |
| C | -4.4980774 | -2.8378769 | -4.2708241 | C | 1.5005048  | -0.1945848 | -3.5660129 |
| C | -3.9345902 | -2.6185979 | -5.5558689 | C | 0.4535948  | 1.8571318  | -4.7462312 |
| H | -4.2075483 | -2.7419863 | -2.1330962 | H | 2.5001876  | -1.6179565 | -0.3347989 |
| H | -5.5286285 | -3.2142534 | -4.1826522 | H | 0.1460671  | 3.983130   | -3.0379627 |
| H | -4.5249981 | -2.8372485 | -6.4585942 | H | 4.1417990  | -2.0733591 | -0.8757199 |
| H | -2.2087086 | -1.9202901 | -6.6608495 | H | 5.0870905  | 2.4172799  | -1.2635186 |
| C | -0.5237744 | -1.1033744 | 3.5688746  | H | 1.1086443  | 3.9318524  | -4.3543204 |
| C | -1.7658154 | -0.9129493 | 2.8935377  | H | 6.6214769  | 0.2092158  | -4.0097669 |
| C | -0.1204328 | -0.1389163 | 4.5093820  | H | 1.5302810  | -2.6004491 | -2.4481144 |
| C | -2.5843257 | 0.2000598  | 3.2085772  | H | -0.4679920 | 1.2825367  | -4.5244625 |
| C | -2.1475758 | 1.1184686  | 4.1842081  | H | 4.7357368  | -0.6573776 | -2.5203801 |
| C | -0.9105534 | 0.9815619  | 4.8339559  |   |            |            |            |
| H | 0.8395498  | -0.2740017 | 5.0371591  |   |            |            |            |
| C | -3.9481481 | 0.3881973  | 2.5482905  |   |            |            |            |
| H | -2.7956716 | 1.9725639  | 4.4298725  |   |            |            |            |
| C | -4.0952979 | 1.7499012  | 1.8501774  |   |            |            |            |
| H | -4.0436067 | 2.5924686  | 2.5703043  |   |            |            |            |
| H | -5.0737850 | 1.8161871  | 1.3321637  |   |            |            |            |
| H | -3.2982379 | 1.8939790  | 1.0948254  |   |            |            |            |
| C | -5.0778995 | 0.1478163  | 3.5674019  |   |            |            |            |
| H | -4.0461742 | -0.3923523 | 1.7658442  |   |            |            |            |
| H | -5.0403681 | 0.8889209  | 4.3931105  |   |            |            |            |
| H | -5.0022871 | -0.8615311 | 4.0199684  |   |            |            |            |
| H | -6.0720217 | 0.2346390  | 3.0821378  |   |            |            |            |
| C | -0.4190686 | 1.9536349  | 5.9016498  |   |            |            |            |
| C | -1.0590195 | 3.3454369  | 5.8295691  |   |            |            |            |
| H | -0.5709851 | 4.0323974  | 6.5500164  |   |            |            |            |
| H | -2.1371136 | 3.3144690  | 6.0924790  |   |            |            |            |
| H | -0.9741704 | 3.7880437  | 4.8176128  |   |            |            |            |
| C | -0.5993434 | 1.3418122  | 7.3057589  |   |            |            |            |
| H | 0.6731942  | 2.0778253  | 5.7253877  |   |            |            |            |
| H | -0.1816155 | 2.0094427  | 8.0875163  |   |            |            |            |
| H | -0.0962213 | 0.3578482  | 7.3901366  |   |            |            |            |
| H | -1.6760269 | 1.1864430  | 7.5269689  |   |            |            |            |
| C | 0.3532870  | -2.3374997 | 3.3474389  |   |            |            |            |
| C | 1.8182961  | -2.0101829 | 3.0239806  |   |            |            |            |
| H | 2.4281744  | -2.9347572 | 2.9667989  |   |            |            |            |
| H | 2.2990240  | -1.3668757 | 3.7912004  |   |            |            |            |
| H | 1.9054614  | -1.5150835 | 2.0373911  |   |            |            |            |
| C | 0.2487682  | -3.2778314 | 4.5648861  |   |            |            |            |
| H | -0.0470044 | -2.8864091 | 2.4726082  |   |            |            |            |
| H | 0.8156784  | -4.2151178 | 4.3887945  |   |            |            |            |
| H | -0.8051267 | -3.5479543 | 4.7791733  |   |            |            |            |

### TS2-jma-dma; COSMO

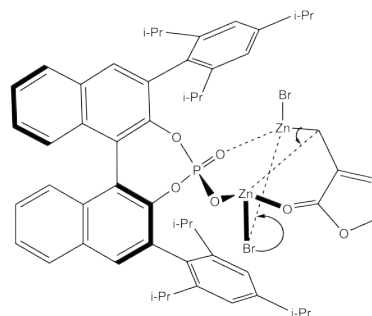

Energy (Hartree) = -11625.0876182

|    |            |           |            |
|----|------------|-----------|------------|
| Zn | 2.5064520  | 0.7019142 | 1.8979441  |
| Br | 4.7580047  | 0.5250211 | 1.5324489  |
| H  | 1.9890337  | 5.8961170 | 4.3248992  |
| Br | 0.5308838  | 5.2546141 | -1.1932064 |
| H  | -1.5292078 | 3.3391308 | 1.9044381  |
| Zn | 0.0635795  | 3.3016610 | -0.0246528 |
| C  | 0.2118773  | 4.9102446 | 3.4898780  |
| C  | 1.2667186  | 5.0742908 | 4.5265517  |
| C  | 0.3136073  | 3.6721577 | 2.9136805  |
| C  | -0.4788401 | 2.9826837 | 1.8935555  |
| C  | 1.4775519  | 3.0400671 | 3.5661253  |
| O  | 2.0031352  | 3.8338802 | 4.5098134  |
| O  | 1.9848066  | 1.9165410 | 3.3737941  |
| H  | 0.8652171  | 5.2222418 | 5.5538277  |
| H  | -0.4835049 | 1.8917750 | 2.0794068  |

|   |            |            |            |   |            |            |            |
|---|------------|------------|------------|---|------------|------------|------------|
| H | -0.5385673 | 5.6793141  | 3.2630630  | H | 1.1392141  | -3.9879248 | 4.7808743  |
| C | -1.4303454 | -1.8415350 | 0.1772387  | H | -0.6050716 | -3.5741501 | 4.8834485  |
| C | -1.3011696 | -2.7563706 | -0.8761852 | H | 0.6021478  | -2.5655432 | 5.7325994  |
| C | -1.3855740 | -4.1632904 | -0.5582345 | H | 3.4954779  | 4.5045491  | -2.9314719 |
| C | -1.1020898 | -5.1918217 | -1.5074141 | H | 5.1558186  | -1.1277509 | -4.1856698 |
| C | -1.7302685 | -4.5582979 | 0.7875431  | H | -1.1161656 | 2.4534359  | -6.6021347 |
| C | -1.8573509 | -5.9458875 | 1.0988542  | C | 4.0220088  | 3.5749454  | -2.6242394 |
| C | -1.8752924 | -3.5657295 | 1.7985624  | H | 4.2345632  | -2.7397752 | -1.5513615 |
| H | -2.1024553 | -3.8852919 | 2.8274805  | H | 4.6687410  | 4.4530813  | -0.7152591 |
| C | -1.6742610 | -2.2154280 | 1.5359027  | H | -2.0957487 | 3.1067270  | -4.3470530 |
| C | 0.4543247  | -0.8725828 | -3.7347106 | C | 3.1766636  | 2.4052893  | -3.1100638 |
| C | -0.2216597 | -1.3576042 | -4.8473421 | C | 4.2665093  | -1.7925872 | -4.1934882 |
| H | 0.0775921  | -1.0191090 | -5.8513469 | C | 4.0958394  | 3.5770803  | -1.0847881 |
| C | -1.3423745 | -2.2314461 | -4.7217284 | H | 4.5837626  | 2.6596597  | -0.6951580 |
| C | -2.0801356 | -2.6461608 | -5.8713621 | C | 3.6024530  | 1.0761991  | -2.9252051 |
| C | -1.7802983 | -2.6605654 | -3.4130502 | C | -0.1332979 | 2.2701256  | -6.1197317 |
| C | -2.9815437 | -3.4253209 | -3.3198206 | H | 5.3711982  | 3.6071921  | -4.3606914 |
| C | -1.0087828 | -2.2700270 | -2.2563017 | C | 1.9198952  | 2.6176181  | -3.6974766 |
| C | 0.0488663  | -1.3790061 | -2.4589893 | C | 5.4255154  | 3.5929586  | -3.2531744 |
| O | -1.3385553 | -0.4754519 | -0.0911674 | H | 5.9927944  | 4.4882169  | -2.9243627 |
| O | 0.7917048  | -0.9613643 | -1.3551720 | H | 1.5851711  | 3.6540218  | -3.8585891 |
| P | 0.1509197  | 0.1616352  | -0.3565359 | C | 3.9611450  | -1.6712450 | -1.6723867 |
| O | 0.9924055  | 0.0711804  | 0.9270781  | H | 4.6237431  | -2.8396998 | -4.1028536 |
| O | -0.0540994 | 1.5340088  | -0.9937298 | H | 3.7727935  | -1.6796267 | -5.1801043 |
| C | -1.6137420 | -6.9176101 | 0.1401900  | C | 2.7755704  | -0.0162016 | -3.2280586 |
| C | -1.2141364 | -6.5331816 | -1.1675732 | C | -1.1040618 | 2.9542612  | -3.8727062 |
| H | -2.1354594 | -6.2296831 | 2.1261018  | C | 1.0471127  | 1.5589391  | -4.0169453 |
| H | -1.7089791 | -7.9841442 | 0.3948164  | H | 0.3878671  | 1.4730139  | -6.6890093 |
| H | -0.7808110 | -4.9130595 | -2.5200424 | H | 0.4709904  | 3.1964504  | -6.2180712 |
| H | -0.9845637 | -7.3047804 | -1.9182280 | C | 3.3051465  | -1.4370078 | -3.0420168 |
| C | -3.6864743 | -3.7958238 | -4.4573997 | C | 1.4668153  | 0.2273798  | -3.7358078 |
| C | -3.2251262 | -3.4192485 | -5.7467457 | C | -0.3114849 | 1.8829151  | -4.6384816 |
| H | -3.3545331 | -3.7160094 | -2.3278668 | H | 3.2773290  | -1.3932579 | -0.8476035 |
| H | -4.6132215 | -4.3812121 | -4.3570656 | H | -1.2619178 | 2.6467615  | -2.8213496 |
| H | -3.7865923 | -3.7256827 | -6.6424631 | H | 4.8904320  | -1.0788785 | -1.5466527 |
| H | -1.7293308 | -2.3222320 | -6.8638559 | H | 3.0773531  | 3.6378854  | -0.6477016 |
| C | -0.5326042 | -1.1864146 | 3.5429570  | H | -0.5873505 | 3.9350123  | -3.8545487 |
| C | -1.6248889 | -1.1872930 | 2.6238478  | H | 6.0155867  | 2.7007975  | -2.9558221 |
| C | -0.4766679 | -0.1799219 | 4.5226329  | H | 2.4418755  | -2.1304519 | -3.1190558 |
| C | -2.6289878 | -0.1878103 | 2.7247278  | H | -0.9239897 | 0.9598188  | -4.6132841 |
| C | -2.5376247 | 0.7785598  | 3.7455071  | H | 4.5995115  | 0.8845884  | -2.4987427 |
| C | -1.4673507 | 0.8104890  | 4.6525460  |   |            |            |            |
| H | 0.3753097  | -0.1647949 | 5.2225680  |   |            |            |            |
| C | -3.8282176 | -0.1438321 | 1.7799629  |   |            |            |            |
| H | -3.3290029 | 1.5388021  | 3.8162175  |   |            |            |            |
| C | -3.9213762 | 1.1941065  | 1.0240693  |   |            |            |            |
| H | -4.0967335 | 2.0444004  | 1.7161599  |   |            |            |            |
| H | -4.7650805 | 1.1753005  | 0.3039187  |   |            |            |            |
| H | -2.9922148 | 1.3942257  | 0.4559016  |   |            |            |            |
| C | -5.1342009 | -0.4616706 | 2.5321250  |   |            |            |            |
| H | -3.6909994 | -0.9408084 | 1.0214838  |   |            |            |            |
| H | -5.3518750 | 0.3026079  | 3.3074625  |   |            |            |            |
| H | -5.0767230 | -1.4466201 | 3.0385849  |   |            |            |            |
| H | -5.9950658 | -0.4842481 | 1.8323017  |   |            |            |            |
| C | -1.3556894 | 1.8395155  | 5.7747172  |   |            |            |            |
| C | -2.2360993 | 3.0801384  | 5.5829524  |   |            |            |            |
| H | -2.0203345 | 3.8314864  | 6.3695545  |   |            |            |            |
| H | -3.3148346 | 2.8301893  | 5.6599942  |   |            |            |            |
| H | -2.0651711 | 3.5568153  | 4.5974517  |   |            |            |            |
| C | -1.6369347 | 1.1792179  | 7.1400864  |   |            |            |            |
| H | -0.2934311 | 2.1777235  | 5.7867408  |   |            |            |            |
| H | -1.4896299 | 1.9014898  | 7.9696149  |   |            |            |            |
| H | -0.9717662 | 0.3110239  | 7.3192489  |   |            |            |            |
| H | -2.6843839 | 0.8141577  | 7.1845723  |   |            |            |            |
| C | 0.5551314  | -2.2642234 | 3.5497326  |   |            |            |            |
| C | 1.9860286  | -1.7063179 | 3.4320513  |   |            |            |            |
| H | 2.7456427  | -2.4789379 | 3.6662563  |   |            |            |            |
| H | 2.1739640  | -0.8545112 | 4.1192776  |   |            |            |            |
| H | 2.1920103  | -1.4140354 | 2.3794480  |   |            |            |            |
| C | 0.4154165  | -3.1473745 | 4.8059189  |   |            |            |            |
| H | 0.3985968  | -2.9174019 | 2.6693398  |   |            |            |            |

### TS2-jma-dma

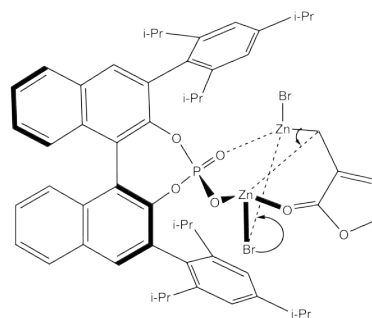

Energy (Hartree) = -11625.07555976  
number of imaginary frequencies: 1

|    |            |           |            |
|----|------------|-----------|------------|
| Zn | 2.5135883  | 0.7101123 | 1.8939107  |
| Br | 4.7592957  | 0.5385328 | 1.5234910  |
| H  | 1.9604695  | 5.9059413 | 4.3106575  |
| Br | 0.5508904  | 5.2487198 | -1.1832227 |
| H  | -1.5426412 | 3.3209902 | 1.8927939  |
| Zn | 0.0720167  | 3.3012432 | -0.0264581 |
| C  | 0.1872426  | 4.9087009 | 3.4760065  |
| C  | 1.2415727  | 5.0806656 | 4.5135600  |
| C  | 0.2954359  | 3.6689964 | 2.9044936  |
| C  | -0.4896146 | 2.9725194 | 1.8866871  |
| C  | 1.4646135  | 3.0443245 | 3.5599676  |

|   |            |            |            |   |            |            |            |
|---|------------|------------|------------|---|------------|------------|------------|
| O | 1.9841241  | 3.8462997  | 4.5027657  | H | 2.1726987  | -0.8625210 | 4.1304328  |
| O | 1.9796103  | 1.9268351  | 3.3695396  | H | 2.1941376  | -1.4197303 | 2.3920801  |
| H | 0.8383113  | 5.2296242  | 5.5406129  | C | 0.4069491  | -3.1537132 | 4.8116297  |
| H | -0.4850523 | 1.8814903  | 2.0710048  | H | 0.3952921  | -2.9203193 | 2.6753887  |
| H | -0.5660200 | 5.6730765  | 3.2433550  | H | 1.1287165  | -3.9960497 | 4.7880126  |
| C | -1.4274340 | -1.8402301 | 0.1806429  | H | -0.6145744 | -3.5781073 | 4.8865239  |
| C | -1.2990291 | -2.7551818 | -0.8729667 | H | 0.5919013  | -2.5741414 | 5.7400099  |
| C | -1.3844792 | -4.1619796 | -0.5554954 | H | 3.5101422  | 4.5046078  | -2.9486629 |
| C | -1.1025115 | -5.1896707 | -1.5056358 | H | 5.1532980  | -1.1289533 | -4.1930520 |
| C | -1.7292887 | -4.5578437 | 0.7897631  | H | -1.1177046 | 2.4588572  | -6.5923094 |
| C | -1.8568108 | -5.9453031 | 1.0993630  | C | 4.0368769  | 3.5748617  | -2.6422653 |
| C | -1.8746065 | -3.5654826 | 1.8004766  | H | 4.2388794  | -2.7395694 | -1.5539337 |
| H | -2.1029080 | -3.8846100 | 2.8293079  | H | 4.7053440  | 4.4605135  | -0.7451275 |
| C | -1.6728366 | -2.2152550 | 1.5387795  | H | -2.0929800 | 3.1152687  | -4.3357454 |
| C | 0.4552051  | -0.8688212 | -3.7300264 | C | 3.1838772  | 2.4058237  | -3.1158729 |
| C | -0.2228841 | -1.3517233 | -4.8421365 | C | 4.2636434  | -1.7930453 | -4.1972717 |
| H | 0.0758553  | -1.0106466 | -5.8453805 | C | 4.1259400  | 3.5844095  | -1.1038167 |
| C | -1.3435025 | -2.2254245 | -4.7174671 | H | 4.6151910  | 2.6680092  | -0.7135167 |
| C | -2.0825391 | -2.6383772 | -5.8663250 | C | 3.6076253  | 1.0764283  | -2.9304053 |
| C | -1.7799922 | -2.6573124 | -3.4094149 | C | -0.1347380 | 2.2736274  | -6.1108723 |
| C | -2.9801986 | -3.4232163 | -3.3167233 | H | 5.3685735  | 3.5944024  | -4.3924945 |
| C | -1.0074649 | -2.2684788 | -2.2530037 | C | 1.9240487  | 2.6195967  | -3.6955471 |
| C | 0.0505219  | -1.3779652 | -2.4553359 | C | 5.4338097  | 3.5853326  | -3.2856783 |
| O | -1.3339690 | -0.4747821 | -0.0866837 | H | 6.0077429  | 4.4798118  | -2.9666109 |
| O | 0.7952459  | -0.9625319 | -1.3519465 | H | 1.5903464  | 3.6564199  | -3.8556156 |
| P | 0.1569763  | 0.1601233  | -0.3528269 | C | 3.9661624  | -1.6709346 | -1.6749076 |
| O | 0.9975771  | 0.0697256  | 0.9317091  | H | 4.6205787  | -2.8403750 | -4.1080803 |
| O | -0.0450053 | 1.5321885  | -0.9913986 | C | 3.7669306  | -1.6791944 | -5.1820676 |
| C | -1.6141267 | -6.9160426 | 0.1402671  | H | 2.7778842  | -0.0149509 | -3.2277909 |
| C | -1.2152482 | -6.5307668 | -1.1668831 | C | -1.1004957 | 2.9620214  | -3.8635660 |
| H | -2.1347784 | -6.2298738 | 2.1264375  | C | 1.0484815  | 1.5623381  | -4.0105817 |
| H | -1.7097622 | -7.9826639 | 0.3941599  | H | 0.3848427  | 1.4758580  | -6.6805422 |
| H | -0.7822425 | -4.9091654 | -2.5179943 | H | 0.4714753  | 3.1982387  | -6.2108880 |
| H | -0.9867675 | -7.3017613 | -1.9183912 | C | 3.3065810  | -1.4362409 | -3.0427897 |
| C | -3.6857499 | -3.7919428 | -4.4539999 | C | 1.4681084  | 0.2304679  | -3.7312382 |
| C | -3.2264004 | -3.4123165 | -5.7424919 | C | -0.3112107 | 1.8880259  | -4.6290487 |
| H | -3.3513280 | -3.7161120 | -2.3248115 | H | 3.2855718  | -1.3923123 | -0.8478580 |
| H | -4.6117173 | -4.3784975 | -4.3538228 | H | -1.2577346 | 2.6562153  | -2.8118640 |
| H | -3.7884863 | -3.7170883 | -6.6383220 | H | 4.8964502  | -1.0800304 | -1.5509744 |
| H | -1.7331166 | -2.3118836 | -6.8584306 | H | 3.1122061  | 3.6516518  | -0.6573201 |
| C | -0.5342113 | -1.1894659 | 3.5491799  | H | -0.5832559 | 3.9423592  | -3.8471397 |
| C | -1.6242800 | -1.1883230 | 2.6277372  | H | 6.0240836  | 2.6927344  | -2.9904803 |
| C | -0.4797855 | -0.1844341 | 4.5300705  | H | 2.4424882  | -2.1291111 | -3.1171986 |
| C | -2.6276954 | -0.1883525 | 2.7277267  | H | -0.9256392 | 0.9661530  | -4.6016292 |
| C | -2.5376314 | 0.7765325  | 3.7497357  | H | 4.6063948  | 0.8838925  | -2.5085342 |
| C | -1.4697342 | 0.8063361  | 4.6591925  |   |            |            |            |
| H | 0.3709059  | -0.1707747 | 5.2317158  |   |            |            |            |
| C | -3.8254445 | -0.1435019 | 1.7811865  |   |            |            |            |
| H | -3.3288828 | 1.5369312  | 3.8197170  |   |            |            |            |
| C | -3.9173950 | 1.1939388  | 1.0245864  |   |            |            |            |
| H | -4.0945823 | 2.0449037  | 1.7155138  |   |            |            |            |
| H | -4.7595325 | 1.1750546  | 0.3028840  |   |            |            |            |
| H | -2.9878847 | 1.3930840  | 0.4569965  |   |            |            |            |
| C | -5.1321335 | -0.4621137 | 2.5315990  |   |            |            |            |
| H | -3.6867603 | -0.9402573 | 1.0228610  |   |            |            |            |
| H | -5.3514792 | 0.3013247  | 3.3071734  |   |            |            |            |
| H | -5.0748744 | -1.4468856 | 3.0379749  |   |            |            |            |
| H | -5.9923458 | -0.4847996 | 1.8311121  |   |            |            |            |
| C | -1.3604819 | 1.8323503  | 5.7845003  |   |            |            |            |
| C | -2.2393988 | 3.0741538  | 5.5935074  |   |            |            |            |
| H | -2.0266247 | 3.8235848  | 6.3828729  |   |            |            |            |
| H | -3.3184031 | 2.8248703  | 5.6670833  |   |            |            |            |
| H | -2.0655336 | 3.5531851  | 4.6097209  |   |            |            |            |
| C | -1.6468624 | 1.1688696  | 7.1471784  |   |            |            |            |
| H | -0.2979280 | 2.1701904  | 5.8003403  |   |            |            |            |
| H | -1.5019741 | 1.8879061  | 7.9799635  |   |            |            |            |
| H | -0.9839243 | 0.2991367  | 7.3259246  |   |            |            |            |
| H | -2.6943988 | 0.8042153  | 7.1868624  |   |            |            |            |
| C | 0.5518700  | -2.2689334 | 3.5571481  |   |            |            |            |
| C | 1.9842498  | -1.7138913 | 3.4429257  |   |            |            |            |
| H | 2.7416792  | -2.4882449 | 3.6788088  |   |            |            |            |

### int-jma-dma; COSMO

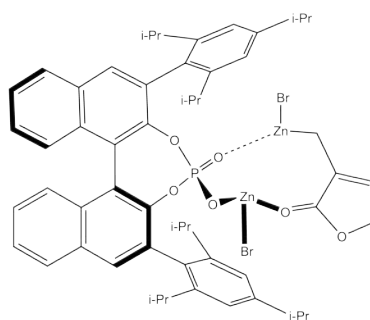

Energy (Hartree) = -11625.08859186

|    |            |           |            |
|----|------------|-----------|------------|
| Zn | 2.1376165  | 1.0205745 | 1.9289833  |
| Br | 4.2556638  | 0.2865830 | 2.4011377  |
| H  | 3.3883861  | 6.3138750 | 0.7849092  |
| Br | 0.5937641  | 4.4308213 | -3.1295383 |
| H  | -1.2538192 | 4.4691595 | 0.4354587  |
| Zn | 0.0686734  | 3.1200143 | -1.2573126 |
| C  | 1.2426048  | 5.8809981 | 0.7612969  |
| C  | 2.5293157  | 6.1267730 | 1.4674864  |
| C  | 0.7993683  | 4.6135667 | 1.0353028  |

|   |            |            |            |   |            |            |            |
|---|------------|------------|------------|---|------------|------------|------------|
| C | -0.3559412 | 3.8360901  | 0.5755628  | C | 1.1031078  | -1.6457285 | 3.6418449  |
| C | 1.8175870  | 4.0348725  | 1.9314920  | H | 1.5833596  | -2.6087699 | 3.9101158  |
| O | 2.8034738  | 4.9049153  | 2.1862668  | H | 1.5525729  | -0.8709104 | 4.2984300  |
| O | 1.8349037  | 2.9046385  | 2.4618432  | H | 1.3843679  | -1.4284410 | 2.5928153  |
| H | 2.4985500  | 6.9579946  | 2.2058972  | C | -0.8232582 | -2.2380946 | 5.1899437  |
| H | -0.5896453 | 3.0035342  | 1.2661124  | H | -0.7653816 | -2.4937234 | 3.0589539  |
| H | 0.7585544  | 6.6203920  | 0.1094755  | H | -0.3602547 | -3.2242349 | 5.4006327  |
| C | -1.9884347 | -1.5136714 | 0.2957431  | H | -1.9231811 | -2.3478217 | 5.2808103  |
| C | -1.8975610 | -2.6655645 | -0.4962281 | H | -0.4929034 | -1.5325062 | 5.9808748  |
| C | -2.3604664 | -3.9088535 | 0.0817906  | H | 4.6950805  | 2.9386527  | -2.7856338 |
| C | -2.1755606 | -5.1773306 | -0.5472812 | H | 5.3220628  | -2.8408433 | -2.1848208 |
| C | -3.0035557 | -3.8841055 | 1.3758654  | H | 0.7006954  | 1.4940549  | -6.8712498 |
| C | -3.5123443 | -5.0980220 | 1.9287344  | C | 4.5455039  | 2.2552369  | -1.9205001 |
| C | -3.0364467 | -2.6730391 | 2.1261879  | H | 3.5026007  | -3.6689278 | 0.3398894  |
| H | -3.4503976 | -2.6911190 | 3.1464262  | H | 4.2470843  | 3.9049494  | -0.4841763 |
| C | -2.4724803 | -1.4999298 | 1.6412692  | H | -1.2022067 | 0.8787659  | -5.3177646 |
| C | 0.7895871  | -1.9472635 | -3.1614283 | C | 3.7566182  | 1.0535982  | -2.4312406 |
| C | 0.2856842  | -2.6361887 | -4.2569073 | C | 4.3613206  | -3.3823149 | -2.3135730 |
| H | 0.8704636  | -2.6845477 | -5.1877704 | C | 3.7004706  | 3.0243024  | -0.8820527 |
| C | -1.0132761 | -3.2265908 | -4.2350511 | H | 3.4676643  | 2.3652460  | -0.0167966 |
| C | -1.5632647 | -3.8273083 | -5.4075175 | C | 3.8821602  | -0.2197894 | -1.8501433 |
| C | -1.8158999 | -3.1678566 | -3.0348338 | C | 1.3857865  | 1.4846280  | -5.9990583 |
| C | -3.1596012 | -3.6433282 | -3.0948729 | H | 6.5243334  | 1.3042665  | -2.0506836 |
| C | -1.2386473 | -2.6078884 | -1.8349221 | C | 2.8173926  | 1.2177278  | -3.4671852 |
| C | 0.0114043  | -1.9928321 | -1.9563377 | C | 5.9228791  | 1.9060027  | -1.3399300 |
| O | -1.5934142 | -0.2844404 | -0.2326265 | H | 6.4893978  | 2.8299835  | -1.1053862 |
| O | 0.5769519  | -1.3957281 | -0.8282466 | H | 2.7442033  | 2.2000424  | -3.9566418 |
| P | 0.0010349  | 0.0619786  | -0.3674148 | C | 3.4623695  | -2.6343928 | -0.0586092 |
| O | 0.6270860  | 0.3318687  | 1.0105026  | H | 4.4948629  | -4.4115341 | -1.9197554 |
| O | 0.1245409  | 1.1438943  | -1.4367708 | H | 4.1579320  | -3.4514250 | -3.4015132 |
| C | -3.3574199 | -6.3056419 | 1.2651886  | C | 3.0142301  | -1.2723035 | -2.1910272 |
| C | -2.6627281 | -6.3437703 | 0.0273266  | C | -0.4966443 | 0.8104552  | -4.4639095 |
| H | -4.0128709 | -5.0578829 | 2.9090207  | C | 1.9260787  | 0.1983025  | -3.8490154 |
| H | -3.7489283 | -7.2352199 | 1.7056318  | H | 2.4086618  | 1.2666345  | -6.3680052 |
| H | -1.6300583 | -5.2311820 | -1.4985992 | H | 1.3814676  | 2.5084744  | -5.5717339 |
| H | -2.5017835 | -7.3070619 | -0.4803650 | C | 3.2195590  | -2.6549089 | -1.5748316 |
| C | -3.6722333 | -4.1991529 | -4.2596227 | C | 1.9789719  | -1.0388518 | -3.1372882 |
| C | -2.8635698 | -4.3104608 | -5.4217858 | C | 0.9110265  | 0.4420588  | -4.9737771 |
| H | -3.7965050 | -3.5576346 | -2.2031803 | H | 2.6528811  | -2.0940157 | 0.4684054  |
| H | -4.7147431 | -4.5515810 | -4.2823707 | H | -0.8943004 | 0.0664106  | -3.7482650 |
| H | -3.2761692 | -4.7621305 | -6.3367810 | H | 4.4199025  | -2.1426274 | 0.2078263  |
| H | -0.9376523 | -3.8794242 | -6.3124606 | H | 2.7507217  | 3.3861122  | -1.3270854 |
| C | -1.1383895 | -0.4184090 | 3.4735624  | H | -0.4768002 | 1.7919100  | -3.9515262 |
| C | -2.1796526 | -0.3104739 | 2.5026580  | H | 5.8313819  | 1.3320573  | -0.3943045 |
| C | -0.7537389 | 0.7363865  | 4.1767020  | H | 2.2952218  | -3.2426633 | -1.7559410 |
| C | -2.8144247 | 0.9394021  | 2.2838261  | H | 0.8147688  | -0.5175496 | -5.5221580 |
| C | -2.4092071 | 2.0583423  | 3.0388291  | H | 4.6517028  | -0.3954331 | -1.0848233 |
| C | -1.3707902 | 1.9864808  | 3.9815112  |   |            |            |            |
| H | 0.0588906  | 0.6625498  | 4.9193441  |   |            |            |            |
| C | -3.9491989 | 1.0943839  | 1.2739818  |   |            |            |            |
| H | -2.9168749 | 3.0187146  | 2.8665506  |   |            |            |            |
| C | -3.6733785 | 2.1975172  | 0.2369321  |   |            |            |            |
| H | -3.6167540 | 3.2008747  | 0.7078499  |   |            |            |            |
| H | -4.4855247 | 2.2316970  | -0.5177995 |   |            |            |            |
| H | -2.7204006 | 2.0143112  | -0.2971488 |   |            |            |            |
| C | -5.2911485 | 1.3243914  | 1.9949819  |   |            |            |            |
| H | -4.0370279 | 0.1365705  | 0.7212678  |   |            |            |            |
| H | -5.2808006 | 2.2734563  | 2.5711589  |   |            |            |            |
| H | -5.5110676 | 0.5022207  | 2.7058436  |   |            |            |            |
| H | -6.1254139 | 1.3818040  | 1.2655072  |   |            |            |            |
| C | -0.9165309 | 3.1780351  | 4.8194922  |   |            |            |            |
| C | -1.3087257 | 4.5437937  | 4.2429521  |   |            |            |            |
| H | -0.8475130 | 5.3587980  | 4.8364999  |   |            |            |            |
| H | -2.4073998 | 4.7005105  | 4.2731182  |   |            |            |            |
| H | -0.9813314 | 4.6566696  | 3.1906394  |   |            |            |            |
| C | -1.4188028 | 3.0346192  | 6.2706296  |   |            |            |            |
| H | 0.1956860  | 3.1301928  | 4.8430354  |   |            |            |            |
| H | -1.0336626 | 3.8581638  | 6.9069421  |   |            |            |            |
| H | -1.0979904 | 2.0742071  | 6.7216344  |   |            |            |            |
| H | -2.5282162 | 3.0665644  | 6.3025836  |   |            |            |            |
| C | -0.4242914 | -1.7346122 | 3.7893186  |   |            |            |            |

### int-jma-dma

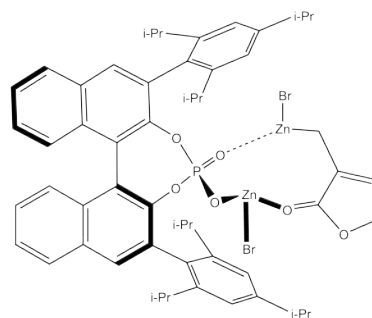

Energy (Hartree) = -11625.0782243

|    |            |           |            |
|----|------------|-----------|------------|
| Zn | 2.1713419  | 1.0177143 | 1.9010998  |
| Br | 4.2754183  | 0.2854229 | 2.3985624  |
| H  | 3.3685408  | 6.2798463 | 0.6628387  |
| Br | 0.6372508  | 4.4533960 | -3.1060969 |
| H  | -1.2881591 | 4.4656301 | 0.4022921  |
| Zn | 0.0654564  | 3.1181632 | -1.2774225 |
| C  | 1.2178413  | 5.8768462 | 0.6948956  |
| C  | 2.5240415  | 6.1151569 | 1.3699169  |

|   |            |            |            |   |            |            |            |
|---|------------|------------|------------|---|------------|------------|------------|
| C | 0.7691948  | 4.6163696  | 0.9924064  | C | -0.4274059 | -1.7428736 | 3.8014641  |
| C | -0.3896630 | 3.8368341  | 0.5540755  | C | 1.1007887  | -1.6533111 | 3.6634230  |
| C | 1.8026562  | 4.0359855  | 1.8728482  | H | 1.5787109  | -2.6197778 | 3.9230369  |
| O | 2.8012518  | 4.9025233  | 2.0986988  | H | 1.5487736  | -0.8868103 | 4.3303998  |
| O | 1.8220597  | 2.9094917  | 2.4046980  | H | 1.3894647  | -1.4230205 | 2.6195386  |
| H | 2.5237110  | 6.9575472  | 2.0971082  | C | -0.8344874 | -2.2510466 | 5.1979700  |
| H | -0.6181338 | 3.0077464  | 1.2500900  | H | -0.7640794 | -2.4996500 | 3.0664711  |
| H | 0.7314031  | 6.6065120  | 0.0342910  | H | -0.3721331 | -3.2372476 | 5.4096924  |
| C | -1.9872347 | -1.5157344 | 0.3057605  | H | -1.9347173 | -2.3614097 | 5.2828459  |
| C | -1.8979159 | -2.6644191 | -0.4912743 | H | -0.5104903 | -1.5474765 | 5.9932205  |
| C | -2.3628599 | -3.9094649 | 0.0811627  | H | 4.7225873  | 2.9287998  | -2.7875117 |
| C | -2.1799739 | -5.1749553 | -0.5540031 | H | 5.3201198  | -2.8365150 | -2.1758402 |
| C | -3.0061748 | -3.8903121 | 1.3749991  | H | 0.7104496  | 1.5174048  | -6.8542963 |
| C | -3.5164927 | -5.1061196 | 1.9210203  | C | 4.5704846  | 2.2511610  | -1.9182004 |
| C | -3.0381513 | -2.6825627 | 2.1300767  | H | 3.4995305  | -3.6711675 | 0.3451824  |
| H | -3.4524691 | -2.7034456 | 3.1501255  | H | 4.2973911  | 3.9089460  | -0.4870524 |
| C | -2.4731250 | -1.5079721 | 1.6508137  | H | -1.1963272 | 0.9050851  | -5.3015471 |
| C | 0.7898120  | -1.9349803 | -3.1525525 | C | 3.7679154  | 1.0553555  | -2.4210957 |
| C | 0.2847457  | -2.6187689 | -4.2505956 | C | 4.3591999  | -3.3768030 | -2.3066346 |
| H | 0.8706544  | -2.6624095 | -5.1809835 | C | 3.7384376  | 3.0333085  | -0.8794459 |
| C | -1.0139751 | -3.2090233 | -4.2323068 | H | 3.5069787  | 2.3808286  | -0.0089272 |
| C | -1.5644428 | -3.8043588 | -5.4067215 | C | 3.8873675  | -0.2179711 | -1.8391937 |
| C | -1.8164704 | -3.1559350 | -3.0319903 | C | 1.3943772  | 1.5041476  | -5.9813425 |
| C | -3.1598538 | -3.6311434 | -3.0943600 | H | 6.5373959  | 1.2766644  | -2.0518838 |
| C | -1.2388640 | -2.6020984 | -1.8296301 | C | 2.8264647  | 1.2252415  | -3.4536405 |
| C | 0.0116743  | -1.9876096 | -1.9477754 | C | 5.9466945  | 1.8899941  | -1.3422315 |
| O | -1.5901355 | -0.2846313 | -0.2144097 | H | 6.5259275  | 2.8083595  | -1.1166867 |
| O | 0.5769736  | -1.3979346 | -0.8161053 | H | 2.7571086  | 2.2080424  | -3.9424953 |
| P | 0.0047533  | 0.0602455  | -0.3527715 | C | 3.4584110  | -2.6355141 | -0.0501510 |
| O | 0.6336137  | 0.3286966  | 1.0247997  | H | 4.4922376  | -4.4074184 | -1.9164051 |
| O | 0.1278208  | 1.1412862  | -1.4222335 | H | 4.1572719  | -3.4414598 | -3.3949256 |
| C | -3.3637571 | -6.3102398 | 1.2517728  | C | 3.0146314  | -1.2663365 | -2.1796395 |
| C | -2.6693493 | -6.3430241 | 0.0142709  | C | -0.4905093 | 0.8339348  | -4.4483498 |
| H | -4.0169721 | -5.0700017 | 2.9014842  | C | 1.9304459  | 0.2102397  | -3.8351286 |
| H | -3.7569120 | -7.2412395 | 1.6875867  | H | 2.4170449  | 1.2843294  | -6.3493648 |
| H | -1.6346330 | -5.2236459 | -1.5055779 | H | 1.3908452  | 2.5271642  | -5.5523917 |
| H | -2.5099900 | -7.3037832 | -0.4985652 | C | 3.2174590  | -2.6508297 | -1.5666885 |
| C | -3.6722177 | -4.1820051 | -4.2610681 | C | 1.9800691  | -1.0281412 | -3.1253228 |
| C | -2.8640356 | -4.2877812 | -5.4233444 | C | 0.9156573  | 0.4608799  | -4.9586578 |
| H | -3.7956930 | -3.5494690 | -2.2016516 | H | 2.6475850  | -2.0990371 | 0.4785630  |
| H | -4.7145914 | -4.5345599 | -4.2851043 | H | -0.8915798 | 0.0921573  | -3.7324081 |
| H | -3.2763556 | -4.7352118 | -6.3404685 | H | 4.4144446  | -2.1437066 | 0.2209969  |
| H | -0.9390255 | -3.8519680 | -6.3120437 | H | 2.7897933  | 3.4029631  | -1.3204504 |
| C | -1.1421844 | -0.4269377 | 3.4861006  | H | -0.4671373 | 1.8169696  | -3.9390604 |
| C | -2.1831568 | -0.3202750 | 2.5152543  | H | 5.8535821  | 1.3243717  | -0.3918591 |
| C | -0.7595537 | 0.7285064  | 4.1884713  | H | 2.2928176  | -3.2372605 | -1.7509259 |
| C | -2.8206268 | 0.9280918  | 2.2969201  | H | 0.8152193  | -0.4971654 | -5.5092148 |
| C | -2.4152320 | 2.0480729  | 3.0494840  | H | 4.6577816  | -0.3977947 | -1.0757799 |
| C | -1.3757070 | 1.9780437  | 3.9907335  |   |            |            |            |
| H | 0.0540538  | 0.6559162  | 4.9301579  |   |            |            |            |
| C | -3.9591321 | 1.0787287  | 1.2905567  |   |            |            |            |
| H | -2.9239102 | 3.0078084  | 2.8768065  |   |            |            |            |
| C | -3.6917495 | 2.1813346  | 0.2510995  |   |            |            |            |
| H | -3.6357342 | 3.1855654  | 0.7203780  |   |            |            |            |
| H | -4.5079068 | 2.2132726  | -0.4993178 |   |            |            |            |
| H | -2.7415756 | 1.9995576  | -0.2879913 |   |            |            |            |
| C | -5.2990506 | 1.3030457  | 2.0167734  |   |            |            |            |
| H | -4.0446821 | 0.1201399  | 0.7388046  |   |            |            |            |
| H | -5.2906878 | 2.2516887  | 2.5935107  |   |            |            |            |
| H | -5.5123441 | 0.4805702  | 2.7289966  |   |            |            |            |
| H | -6.1371433 | 1.3571948  | 1.2914989  |   |            |            |            |
| C | -0.9190134 | 3.1719257  | 4.8241938  |   |            |            |            |
| C | -1.3061584 | 4.5361365  | 4.2406565  |   |            |            |            |
| H | -0.8433474 | 5.3531538  | 4.8302335  |   |            |            |            |
| H | -2.4041882 | 4.6971971  | 4.2704649  |   |            |            |            |
| H | -0.9786643 | 4.6426957  | 3.1877330  |   |            |            |            |
| C | -1.4230619 | 3.0367605  | 6.2752546  |   |            |            |            |
| H | 0.1932624  | 3.1219429  | 4.8479416  |   |            |            |            |
| H | -1.0364967 | 3.8611149  | 6.9096331  |   |            |            |            |
| H | -1.1073745 | 2.0767999  | 6.7304396  |   |            |            |            |
| H | -2.5322327 | 3.0717550  | 6.3057455  |   |            |            |            |

### 7.5.3 Pathway 13j-ma ↔ 13d-mi

#### TS-jma-dmi; COSMO

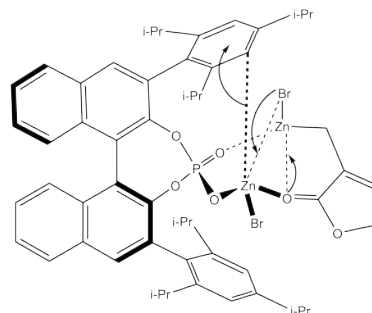

Energy (Hartree) = -11625.1017488

|    |           |            |           |
|----|-----------|------------|-----------|
| Zn | 1.2105627 | -0.6217820 | 2.9544295 |
| Br | 2.7564704 | -0.2481003 | 4.6812551 |
| C  | 0.5996615 | 4.1189861  | 1.4192477 |

|    |            |            |            |   |            |            |            |
|----|------------|------------|------------|---|------------|------------|------------|
| C  | -0.2652434 | 3.3346812  | 2.1305729  | H | -0.6455426 | -4.1002947 | 6.0371598  |
| C  | 0.5103726  | 2.1409864  | 2.5024404  | H | -2.3323900 | -3.6041665 | 5.6824167  |
| O  | 1.7780557  | 2.2200346  | 2.0831205  | C | 2.4643735  | -3.8219430 | 1.6911504  |
| C  | 1.9280335  | 3.4467363  | 1.3283125  | C | 3.5008156  | -2.7143455 | 1.9316929  |
| O  | 0.0644525  | 1.1199504  | 3.0698343  | H | 4.5029746  | -3.0575836 | 1.6032261  |
| C  | -1.7054720 | 3.3553700  | 2.3967768  | H | 3.5857657  | -2.4285554 | 2.9997080  |
| H  | 2.2027583  | 3.1651923  | 0.2867228  | H | 3.2512647  | -1.8057907 | 1.3465431  |
| H  | 2.7749286  | 4.0186422  | 1.7652083  | C | 2.8456984  | -5.1230606 | 2.4253736  |
| Zn | -2.3721203 | 1.5982671  | 1.6548039  | H | 2.4827713  | -4.0395383 | 0.6062444  |
| Br | -4.2809425 | 0.3449924  | 2.1045836  | H | 3.8571130  | -5.4590346 | 2.1176513  |
| C  | -0.0748611 | -2.6055837 | -1.1323614 | H | 2.1281223  | -5.9398094 | 2.2055617  |
| C  | 0.3231570  | -2.4750099 | -2.4624598 | H | 2.8600048  | -4.9757027 | 3.5256481  |
| C  | 1.0917947  | -3.5519230 | -3.0451027 | H | 1.0319776  | 7.0448522  | -1.1058160 |
| C  | 1.6881540  | -3.4702258 | -4.3390757 | H | 4.6466106  | 3.1760016  | -3.7659224 |
| C  | 1.2981340  | -4.7578046 | -2.2758943 | H | -3.5654599 | 3.7290879  | -3.7678548 |
| C  | 2.0141716  | -5.8450969 | -2.8609418 | C | 1.9106971  | 6.5622518  | -1.5893823 |
| C  | 0.8488199  | -4.8235251 | -0.9236608 | H | 4.6473051  | 0.6471783  | -1.8598256 |
| H  | 1.0520391  | -5.7355391 | -0.3413798 | H | 3.2934056  | 7.6834714  | -0.3188076 |
| C  | 0.2210033  | -3.7453848 | -0.3150352 | H | -3.5610966 | 3.2348585  | -1.2248941 |
| C  | 0.2205244  | 1.2507290  | -3.3932500 | C | 1.4887015  | 5.1415890  | -1.9483847 |
| C  | -0.2865436 | 1.1875656  | -4.6864834 | C | 4.0786398  | 2.2673401  | -4.0557296 |
| H  | -0.3470488 | 2.1100400  | -5.2839973 | C | 3.0831513  | 6.6313313  | -0.5988972 |
| C  | -0.7640266 | -0.0290383 | -5.2494939 | H | 4.0161599  | 6.2177854  | -1.0346857 |
| C  | -1.3763261 | -0.0578340 | -6.5387488 | C | 2.4279661  | 4.1321878  | -2.2260818 |
| C  | -0.6462393 | -1.2527319 | -4.4946560 | C | -2.4829459 | 3.9690529  | -3.7272262 |
| C  | -1.2099089 | -2.4425042 | -5.0476117 | H | 1.3631083  | 7.3554964  | -3.5685476 |
| C  | 0.0005877  | -1.2237708 | -3.2045109 | C | 0.1265545  | 4.8157642  | -2.0664324 |
| C  | 0.3305605  | 0.0284952  | -2.6619609 | C | 2.2250387  | 7.3591083  | -2.8715813 |
| O  | -0.8214477 | -1.5801235 | -0.5608887 | H | 2.4747946  | 8.4140530  | -2.6341837 |
| O  | 0.8797889  | 0.1200194  | -1.3888027 | H | -0.6228638 | 5.5873800  | -1.8246448 |
| P  | -0.0119797 | -0.2391722 | -0.0482549 | C | 3.8981423  | 1.4388782  | -1.6515705 |
| O  | 1.0614731  | -0.5927616 | 0.9926941  | H | 4.8178166  | 1.4737837  | -4.2899971 |
| O  | -1.0705511 | 0.8111534  | 0.2643743  | H | 3.5199159  | 2.5016580  | -4.9845627 |
| C  | 2.5479306  | -5.7447742 | -4.1372380 | C | 2.0438182  | 2.8451852  | -2.6507217 |
| C  | 2.3976677  | -4.5387244 | -4.8715737 | C | -2.5118913 | 3.5952804  | -1.2180126 |
| H  | 2.1513858  | -6.7628631 | -2.2677219 | C | -0.3117934 | 3.5431037  | -2.4790732 |
| H  | 3.1031445  | -6.5888909 | -4.5737592 | H | -2.0313538 | 3.6729828  | -4.6951662 |
| H  | 1.5885881  | -2.5418903 | -4.9177500 | H | -2.3836005 | 5.0710317  | -3.6344003 |
| H  | 2.8511732  | -4.4464869 | -5.8702442 | C | 3.1290507  | 1.8082930  | -2.9345295 |
| C  | -1.8177134 | -2.4341285 | -6.2955652 | C | 0.6597612  | 2.5584626  | -2.8095337 |
| C  | -1.8895312 | -1.2369914 | -7.0574724 | C | -1.8104020 | 3.2523478  | -2.5424515 |
| H  | -1.1719219 | -3.3740487 | -4.4658876 | H | 3.2100870  | 1.0576518  | -0.8713560 |
| H  | -2.2537175 | -3.3627112 | -6.6945371 | H | -1.9847885 | 3.1191697  | -0.3693218 |
| H  | -2.3667280 | -1.2450132 | -8.0492470 | H | 4.4454010  | 2.3135887  | -1.2406985 |
| H  | -1.4476576 | 0.8826544  | -7.1074720 | H | 2.8694162  | 6.0716248  | 0.3339643  |
| C  | 1.0329198  | -3.4339843 | 2.0505629  | H | -2.5378059 | 4.6879450  | -1.0249163 |
| C  | -0.0480422 | -3.5936388 | 1.1463639  | H | 3.0909250  | 6.9144053  | -3.4058187 |
| C  | 0.7509434  | -2.9233445 | 3.3491430  | H | 2.6303133  | 0.8857895  | -3.2940752 |
| C  | -1.3897009 | -3.3844263 | 1.5836569  | H | -1.9285738 | 2.1600940  | -2.6945536 |
| C  | -1.6226908 | -2.8420488 | 2.8575345  | H | 3.5021337  | 4.3539419  | -2.1261299 |
| C  | -0.5690088 | -2.5807414 | 3.7560902  | H | -1.9251982 | 3.2473582  | 3.4802563  |
| H  | 1.5516858  | -2.9116109 | 4.1076739  | H | -2.2160491 | 4.2518579  | 1.9999173  |
| C  | -2.5495035 | -3.8459485 | 0.7080957  | H | 0.3749881  | 5.0725972  | 0.9254290  |
| H  | -2.6572909 | -2.6326165 | 3.1666805  |   |            |            |            |
| C  | -3.6989899 | -2.8422348 | 0.5830214  |   |            |            |            |
| H  | -4.2183336 | -2.6747625 | 1.5478587  |   |            |            |            |
| H  | -4.4536704 | -3.2187673 | -0.1373105 |   |            |            |            |
| H  | -3.3388457 | -1.8575707 | 0.2313710  |   |            |            |            |
| C  | -3.0430826 | -5.2114937 | 1.2326193  |   |            |            |            |
| H  | -2.1442231 | -4.0208185 | -0.3097941 |   |            |            |            |
| H  | -3.4585079 | -5.1149328 | 2.2576432  |   |            |            |            |
| H  | -2.2216085 | -5.9556803 | 1.2692474  |   |            |            |            |
| H  | -3.8436951 | -5.6112358 | 0.5768097  |   |            |            |            |
| C  | -0.8325785 | -2.0818167 | 5.1720955  |   |            |            |            |
| C  | -1.7847786 | -0.8755561 | 5.2170627  |   |            |            |            |
| H  | -1.9219899 | -0.5383420 | 6.2642335  |   |            |            |            |
| H  | -2.7876994 | -1.1164729 | 4.8091975  |   |            |            |            |
| H  | -1.3899700 | -0.0208519 | 4.6333282  |   |            |            |            |
| C  | -1.3478419 | -3.2423892 | 6.0459454  |   |            |            |            |
| H  | 0.1476956  | -1.7562267 | 5.5860302  |   |            |            |            |
| H  | -1.4736516 | -2.9102546 | 7.0967068  |   |            |            |            |

### TS-jma-dmi

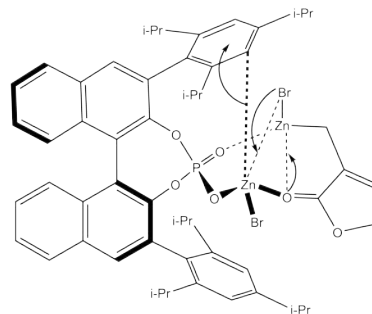

Energy (Hartree) = -11625.09116739  
number of imaginary frequencies: 1

Zn 1.2291078 -0.6152222 2.9635535

|    |            |            |            |   |            |            |            |
|----|------------|------------|------------|---|------------|------------|------------|
| Br | 2.7632441  | -0.2876250 | 4.6944183  | H | 0.1483390  | -1.7588738 | 5.5802896  |
| C  | 0.5976653  | 4.1193795  | 1.4089801  | H | -1.4783642 | -2.9047510 | 7.0948404  |
| C  | -0.2612585 | 3.3372504  | 2.1298049  | H | -0.6554000 | -4.0997957 | 6.0376251  |
| C  | 0.5201773  | 2.1462122  | 2.5031884  | H | -2.3394073 | -3.5976193 | 5.6821571  |
| O  | 1.7859236  | 2.2272116  | 2.0752848  | C | 2.4590133  | -3.8415844 | 1.6950268  |
| C  | 1.9270132  | 3.4479123  | 1.3127419  | C | 3.4991646  | -2.7374520 | 1.9352252  |
| O  | 0.0804737  | 1.1277262  | 3.0755681  | H | 4.5003374  | -3.0835057 | 1.6064396  |
| C  | -1.6981085 | 3.3520084  | 2.4052805  | H | 3.5855627  | -2.4483980 | 3.0021918  |
| H  | 2.1957131  | 3.1613649  | 0.2709749  | H | 3.2525194  | -1.8289056 | 1.3490880  |
| H  | 2.7764600  | 4.0245566  | 1.7396349  | C | 2.8351057  | -5.1437029 | 2.4299269  |
| Zn | -2.3709959 | 1.5893823  | 1.6728066  | H | 2.4770639  | -4.0604374 | 0.6102350  |
| Br | -4.2618120 | 0.3323566  | 2.1370503  | H | 3.8457304  | -5.4845334 | 2.1247007  |
| C  | -0.0673918 | -2.6062691 | -1.1279623 | H | 2.1145745  | -5.9581619 | 2.2111135  |
| C  | 0.3320424  | -2.4747010 | -2.4576380 | H | 2.8489316  | -4.9962574 | 3.5300904  |
| C  | 1.0961061  | -3.5535350 | -3.0425745 | H | 1.0245189  | 7.0506876  | -1.1080547 |
| C  | 1.6941491  | -3.4708993 | -4.3354518 | H | 4.6469315  | 3.1854610  | -3.7674324 |
| C  | 1.2950573  | -4.7629841 | -2.2774646 | H | -3.5706113 | 3.7046293  | -3.7531285 |
| C  | 2.0055378  | -5.8513683 | -2.8660493 | C | 1.9015251  | 6.5728218  | -1.6000358 |
| C  | 0.8428918  | -4.8303150 | -0.9264939 | H | 4.6539454  | 0.6603849  | -1.8522374 |
| H  | 1.0393984  | -5.7451339 | -0.3461848 | H | 3.2884390  | 7.7051258  | -0.3423681 |
| C  | 0.2207914  | -3.7510601 | -0.3144923 | H | -3.5535282 | 3.2238992  | -1.2052742 |
| C  | 0.2269320  | 1.2514414  | -3.3852922 | C | 1.4846316  | 5.1489841  | -1.9525916 |
| C  | -0.2790849 | 1.1882926  | -4.6786603 | C | 4.0799225  | 2.2748178  | -4.0527324 |
| H  | -0.3394046 | 2.1118961  | -5.2744611 | C | 3.0825769  | 6.6517647  | -0.6208198 |
| C  | -0.7545626 | -0.0278605 | -5.2432186 | H | 4.0148037  | 6.2458930  | -1.0652198 |
| C  | -1.3658991 | -0.0572784 | -6.5323637 | C | 2.4264786  | 4.1416104  | -2.2271964 |
| C  | -0.6355427 | -1.2512505 | -4.4886471 | C | -2.4891459 | 3.9495839  | -3.7180215 |
| C  | -1.1979247 | -2.4409676 | -5.0424755 | H | 1.3286902  | 7.3586493  | -3.5744491 |
| C  | 0.0108822  | -1.2225187 | -3.1982553 | C | 0.1237041  | 4.8182241  | -2.0677322 |
| C  | 0.3391648  | 0.0294391  | -2.6535755 | C | 2.1971748  | 7.3702418  | -2.8861309 |
| O  | -0.8101060 | -1.5816937 | -0.5542432 | H | 2.4423538  | 8.4274141  | -2.6541731 |
| O  | 0.8872170  | 0.1215527  | -1.3810848 | H | -0.6283234 | 5.5880799  | -1.8280291 |
| P  | -0.0058577 | -0.2387518 | -0.0385534 | C | 3.9039978  | 1.4516469  | -1.6458468 |
| O  | 1.0698842  | -0.5883590 | 1.0013627  | H | 4.8207752  | 1.4827641  | -4.2864207 |
| O  | -1.0671878 | 0.8083221  | 0.2717844  | H | 3.5193995  | 2.5058455  | -4.9810738 |
| C  | 2.5407102  | -5.7501165 | -4.1411282 | C | 2.0459688  | 2.8520839  | -2.6469578 |
| C  | 2.3977548  | -4.5412048 | -4.8710346 | C | -2.5073879 | 3.5929116  | -1.2061122 |
| H  | 2.1372967  | -6.7718701 | -2.2758011 | C | -0.3113915 | 3.5429476  | -2.4745211 |
| H  | 3.0915253  | -6.5959171 | -4.5798151 | H | -2.0404711 | 3.6487193  | -4.6856384 |
| H  | 1.5989981  | -2.5398223 | -4.9103290 | H | -2.3947488 | 5.0526992  | -3.6346278 |
| H  | 2.8522787  | -4.4479505 | -5.8690895 | C | 3.1332975  | 1.8169721  | -2.9287799 |
| C  | -1.8045978 | -2.4328285 | -6.2904648 | C | 0.6629601  | 2.5608599  | -2.8035358 |
| C  | -1.8772447 | -1.2361847 | -7.0519505 | C | -1.8088702 | 3.2448775  | -2.5306794 |
| H  | -1.1591286 | -3.3719947 | -4.4602857 | H | 3.2179687  | 1.0708300  | -0.8638176 |
| H  | -2.2394768 | -3.3617753 | -6.6896288 | H | -1.9740025 | 3.1273370  | -0.3556478 |
| H  | -2.3538980 | -1.2441712 | -8.0439100 | H | 4.4514984  | 2.3274135  | -1.2374142 |
| H  | -1.4384170 | 0.8835479  | -7.1003704 | H | 2.8824158  | 6.0898465  | 0.3137190  |
| C  | 1.0282005  | -3.4485969 | 2.0529247  | H | -2.5428878 | 4.6869626  | -1.0219778 |
| C  | -0.0516355 | -3.6022553 | 1.1464004  | H | 3.0597206  | 6.9300635  | -3.4290347 |
| C  | 0.7459591  | -2.9366953 | 3.3498908  | H | 2.6356166  | 0.8927561  | -3.2851621 |
| C  | -1.3932667 | -3.3842048 | 1.5794343  | H | -1.9217123 | 2.1509624  | -2.6743233 |
| C  | -1.6254791 | -2.8391289 | 2.8521142  | H | 3.5001640  | 4.3664955  | -2.1292431 |
| C  | -0.5718747 | -2.5856083 | 3.7533106  | H | -1.9110168 | 3.2369658  | 3.4891374  |
| H  | 1.5469312  | -2.9206923 | 4.1079007  | H | -2.2161907 | 4.2477206  | 2.0167350  |
| C  | -2.5532136 | -3.8372378 | 0.6991698  | H | 0.3682783  | 5.0686048  | 0.9093873  |
| H  | -2.6589811 | -2.6173566 | 3.1563588  |   |            |            |            |
| C  | -3.6972325 | -2.8279376 | 0.5703424  |   |            |            |            |
| H  | -4.2205686 | -2.6572429 | 1.5322449  |   |            |            |            |
| H  | -4.4512410 | -3.2000459 | -0.1529237 |   |            |            |            |
| H  | -3.3329384 | -1.8443100 | 0.2205592  |   |            |            |            |
| C  | -3.0554007 | -5.2012024 | 1.2194261  |   |            |            |            |
| H  | -2.1444943 | -4.0131446 | -0.3173362 |   |            |            |            |
| H  | -3.4739986 | -5.1045058 | 2.2430419  |   |            |            |            |
| H  | -2.2382496 | -5.9499729 | 1.2586452  |   |            |            |            |
| H  | -3.8560934 | -5.5965073 | 0.5610441  |   |            |            |            |
| C  | -0.8336847 | -2.0818740 | 5.1681262  |   |            |            |            |
| C  | -1.7801192 | -0.8712501 | 5.2110744  |   |            |            |            |
| H  | -1.9126017 | -0.5292943 | 6.2573188  |   |            |            |            |
| H  | -2.7857680 | -1.1049121 | 4.8059487  |   |            |            |            |
| H  | -1.3819165 | -0.0200866 | 4.6249134  |   |            |            |            |
| C  | -1.3534870 | -3.2384494 | 6.0444599  |   |            |            |            |

## 7.6 Complexes 12

### 12d-ma

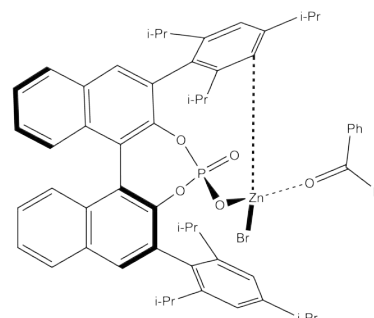



Energy (Hartree)= -7274.225802936

|    |            |            |            |
|----|------------|------------|------------|
| Zn | 0.0618904  | 5.4624951  | 89.9937078 |
| Br | 0.2038715  | 7.2823801  | 91.4756080 |
| C  | 3.7942543  | 6.8283841  | 85.3173127 |
| C  | 2.7940644  | 6.5625353  | 86.2572704 |
| C  | 2.3492315  | 7.6085678  | 87.1046571 |
| C  | 2.9194878  | 8.9015457  | 87.0131994 |
| C  | 3.9099463  | 9.1576662  | 86.0596108 |
| C  | 4.3441756  | 8.1202714  | 85.2129586 |
| H  | 4.1600921  | 6.0164555  | 84.6721309 |
| H  | 2.3883181  | 5.5478011  | 86.4083558 |
| C  | 1.3467693  | 7.3412251  | 88.1272182 |
| H  | 2.5791973  | 9.6965379  | 87.6960160 |
| H  | 4.3558169  | 10.1602157 | 85.9787640 |
| H  | 5.1338499  | 8.3189390  | 84.4715230 |
| O  | 0.6925256  | 6.2827261  | 88.1788627 |
| C  | 0.0676347  | 0.9859379  | 89.0037883 |
| C  | 0.8449383  | -0.1404326 | 89.3053501 |
| C  | 0.2898330  | -1.1172273 | 90.2143564 |
| C  | 1.0479583  | -2.2075963 | 90.7381606 |
| C  | -1.0822777 | -0.9787865 | 90.6461779 |
| C  | -1.6516848 | -1.9731257 | 91.4968489 |
| C  | -1.8197519 | 0.1875959  | 90.2891286 |
| H  | -2.8426273 | 0.3090024  | 90.6790798 |
| C  | -1.2444102 | 1.2041297  | 89.5391220 |
| C  | 4.4225017  | 0.8013545  | 88.2548234 |
| C  | 4.8818265  | -0.4005724 | 87.7319056 |
| H  | 5.9132335  | -0.4626860 | 87.3519724 |
| C  | 4.0299148  | -1.5337929 | 87.5929234 |
| C  | 4.4913617  | -2.7260724 | 86.9587812 |
| C  | 2.6571128  | -1.4528225 | 88.0332409 |
| C  | 1.7924176  | -2.5482603 | 87.7316952 |
| C  | 2.2096892  | -0.2617774 | 88.7183559 |
| C  | 3.0922212  | 0.8276116  | 88.7861267 |
| O  | 0.5414358  | 1.9330642  | 88.1269019 |
| O  | 2.6970820  | 1.9878854  | 89.4235869 |
| P  | 1.6931787  | 3.0420570  | 88.6192464 |
| O  | 1.1297500  | 3.8699099  | 89.8075996 |
| O  | 2.2479239  | 3.6802029  | 87.3834230 |
| C  | -0.8964362 | -3.0431770 | 91.9513992 |
| C  | 0.4708084  | -3.1456982 | 91.5828618 |
| H  | -2.7033440 | -1.8598928 | 91.8045341 |
| H  | -1.3466072 | -3.7987473 | 92.6130840 |
| H  | 2.1093368  | -2.2960831 | 90.4696947 |
| H  | 1.0822232  | -3.9730094 | 91.9744648 |
| C  | 2.2670542  | -3.6858967 | 87.0932226 |
| C  | 3.6329204  | -3.7882300 | 86.7197833 |
| H  | 0.7300555  | -2.4809282 | 88.0029168 |
| H  | 1.5750459  | -4.5121949 | 86.8693689 |
| H  | 4.0013662  | -4.6988184 | 86.2232148 |
| H  | 5.5451761  | -2.7757549 | 86.6420291 |
| C  | -1.8689042 | 3.4148356  | 90.5524762 |
| C  | -1.8150971 | 2.5791712  | 89.4002167 |
| C  | -2.1713989 | 4.7913141  | 90.3793931 |
| C  | -2.1222229 | 3.1196179  | 88.1190373 |
| C  | -2.4344361 | 4.4867743  | 87.9971943 |
| C  | -2.4635602 | 5.3508443  | 89.1042847 |
| H  | -2.2839633 | 5.4296518  | 91.2711103 |
| C  | -2.1627186 | 2.2445127  | 86.8712150 |
| H  | -2.6587347 | 4.8881505  | 86.9992684 |
| C  | -1.3524917 | 2.8316664  | 85.7030950 |
| H  | -1.8124405 | 3.7607467  | 85.3057768 |
| H  | -1.3123377 | 2.1057045  | 84.8657258 |
| H  | -0.3137902 | 3.0587600  | 86.0119685 |
| C  | -3.6267345 | 1.9727219  | 86.4719228 |
| H  | -1.7091585 | 1.2684464  | 87.1345068 |
| H  | -4.1515150 | 2.9131220  | 86.2014246 |
| H  | -4.1912969 | 1.4982932  | 87.2999498 |
| H  | -3.6713030 | 1.2966076  | 85.5934638 |
| C  | -2.8672914 | 6.8172352  | 89.0071204 |

|   |            |           |            |
|---|------------|-----------|------------|
| C | -2.6459000 | 7.4313613 | 87.6196978 |
| H | -2.8197365 | 8.5253834 | 87.6535230 |
| H | -3.3472274 | 7.0146528 | 86.8668895 |
| H | -1.6140061 | 7.2558425 | 87.2569326 |
| C | -4.3290877 | 6.9906302 | 89.4667051 |
| H | -2.2220326 | 7.3653648 | 89.7315247 |
| H | -4.6144576 | 8.0624328 | 89.4654110 |
| H | -4.4851723 | 6.5979535 | 90.4912753 |
| H | -5.0213087 | 6.4500052 | 88.7877664 |
| C | -1.6184415 | 2.9028879 | 91.9693321 |
| C | -0.5103040 | 3.6693365 | 92.7102293 |
| H | -0.3534839 | 3.2285259 | 93.7156795 |
| H | -0.7508103 | 4.7428037 | 92.8559529 |
| H | 0.4485072  | 3.6009479 | 92.1583683 |
| C | -2.9374160 | 2.8947483 | 92.7662358 |
| H | -1.2761913 | 1.8542805 | 91.8871136 |
| H | -2.7790752 | 2.4551589 | 93.7721761 |
| H | -3.7222725 | 2.3030574 | 92.2521047 |
| H | -3.3323982 | 3.9225938 | 92.9082965 |
| H | 7.0404689  | 6.2991210 | 86.8046728 |
| H | 7.5432568  | 2.5579775 | 91.4013434 |
| H | 5.8262163  | 0.9342194 | 83.9017544 |
| C | 7.0042200  | 6.0426336 | 87.8871141 |
| H | 4.6040165  | 2.5004088 | 92.6932956 |
| H | 6.4854448  | 8.1069583 | 88.4360073 |
| C | 3.7089969  | 2.3941564 | 83.8262950 |
| C | 6.4145375  | 4.6415584 | 87.9868576 |
| C | 6.8732408  | 1.6830763 | 91.2653938 |
| C | 6.0944166  | 7.0773191 | 88.5746927 |
| H | 6.0253233  | 6.8880601 | 89.6662599 |
| C | 6.2335376  | 4.0122596 | 89.2311266 |
| C | 6.1510198  | 1.4558473 | 84.8262445 |
| H | 9.1020766  | 5.3832319 | 87.9119618 |
| C | 6.0011115  | 3.9503052 | 86.8384186 |
| C | 8.4419688  | 6.1072498 | 88.4306556 |
| H | 8.8714611  | 7.1223895 | 88.3004543 |
| H | 6.1420502  | 4.4320253 | 85.8573037 |
| C | 4.7599527  | 3.0271479 | 91.7291338 |
| H | 6.7759737  | 1.1767125 | 92.2483876 |
| H | 7.3748024  | 0.9839647 | 90.5657837 |
| C | 5.6308341  | 2.7485974 | 89.3484130 |
| C | 4.1036583  | 2.9539964 | 84.6992584 |
| C | 5.3865030  | 2.6856545 | 86.8965079 |
| H | 6.7262568  | 0.7354447 | 85.4422802 |
| H | 6.8496017  | 2.2669460 | 84.5304828 |
| C | 5.4943981  | 2.1152476 | 90.7312256 |
| C | 5.1936741  | 2.0807541 | 88.1712894 |
| C | 4.9410906  | 2.0230704 | 85.5923596 |
| H | 3.7689153  | 3.3268041 | 91.3364502 |
| H | 3.2507895  | 3.3656928 | 85.2720773 |
| H | 5.3397711  | 3.9479017 | 91.9492332 |
| H | 5.0663949  | 7.0409369 | 88.1631336 |
| H | 4.7086000  | 3.7935389 | 84.2949168 |
| H | 8.4724023  | 5.8701819 | 89.5146714 |
| H | 4.8875171  | 1.1937297 | 90.6198465 |
| H | 4.2840321  | 1.1713661 | 85.8574044 |
| H | 6.5613697  | 4.5284580 | 90.1477801 |
| H | 1.1898921  | 8.1208914 | 88.9186242 |

### 12d-mi; COSMO

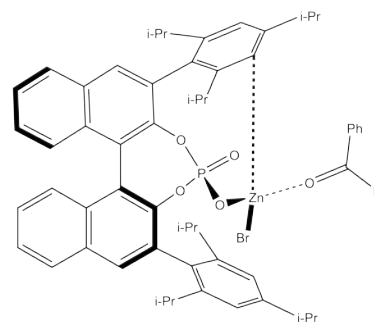

Energy (Hartree)= -7274.240410484

|    |            |            |            |
|----|------------|------------|------------|
| Zn | -0.3180046 | 5.3540990  | 89.7280385 |
| Br | -0.0439425 | 7.3514818  | 90.9147784 |
| C  | 0.9042078  | 6.0829757  | 83.5603897 |
| C  | 0.5399812  | 5.9445493  | 84.9028071 |
| C  | 1.5248254  | 6.0579174  | 85.9107893 |
| C  | 2.8715075  | 6.3011995  | 85.5628765 |
| C  | 3.2302878  | 6.4474488  | 84.2178251 |
| C  | 2.2474745  | 6.3376839  | 83.2185506 |
| H  | 0.1442382  | 5.9910855  | 82.7697700 |
| H  | -0.5000280 | 5.7381358  | 85.1967414 |
| C  | 1.1774168  | 5.9053780  | 87.3212378 |
| H  | 3.6345151  | 6.3511561  | 86.3552033 |
| H  | 4.2791720  | 6.6349674  | 83.9432795 |
| H  | 2.5301395  | 6.4453373  | 82.1598891 |
| O  | 0.0009397  | 5.7618929  | 87.7208048 |
| C  | -0.1795714 | 0.8797773  | 89.1255184 |
| C  | 0.5982174  | -0.2330641 | 89.4706855 |
| C  | 0.0434484  | -1.1756809 | 90.4141992 |
| C  | 0.8014041  | -2.2478341 | 90.9750723 |
| C  | -1.3272491 | -1.0170268 | 90.8434421 |
| C  | -1.8958773 | -1.9748262 | 91.7363225 |
| C  | -2.0673341 | 0.1309427  | 90.4350308 |
| H  | -3.0911961 | 0.2649904  | 90.8169579 |
| C  | -1.4953185 | 1.1147037  | 89.6396070 |
| C  | 4.1664869  | 0.6862979  | 88.3747258 |
| C  | 4.6217502  | -0.5242977 | 87.8676403 |
| H  | 5.6470785  | -0.5919995 | 87.4729881 |
| C  | 3.7721109  | -1.6635385 | 87.7668896 |
| C  | 4.2301930  | -2.8682296 | 87.1528296 |
| C  | 2.4050906  | -1.5783876 | 88.2248919 |
| C  | 1.5404309  | -2.6841699 | 87.9622997 |
| C  | 1.9627769  | -0.3730956 | 88.8874152 |
| C  | 2.8456212  | 0.7161465  | 88.9263876 |
| O  | 0.3080163  | 1.8025622  | 88.2237668 |
| O  | 2.4512966  | 1.8899669  | 89.5488441 |
| P  | 1.4465183  | 2.9166340  | 88.7219464 |
| O  | 0.8643523  | 3.7992860  | 89.8568391 |
| O  | 2.0221507  | 3.5475397  | 87.4825144 |
| C  | -1.1404550 | -3.0279653 | 92.2300075 |
| C  | 0.2251641  | -3.1503470 | 91.8588912 |
| H  | -2.9461118 | -1.8474694 | 92.0431212 |
| H  | -1.5892829 | -3.7552557 | 92.9235896 |
| H  | 1.8613954  | -2.3509776 | 90.7053675 |
| H  | 0.8352013  | -3.9643079 | 92.2796577 |
| C  | 2.0110171  | -3.8343231 | 87.3426724 |
| C  | 3.3722474  | -3.9390707 | 86.9508220 |
| H  | 0.4818287  | -2.6162691 | 88.2481093 |
| H  | 1.3200394  | -4.6690048 | 87.1485280 |
| H  | 3.7370826  | -4.8593478 | 86.4695982 |
| H  | 5.2795099  | -2.9213353 | 86.8220734 |
| C  | -2.1445860 | 3.3791544  | 90.5121385 |
| C  | -2.0952414 | 2.4673287  | 89.4175296 |
| C  | -2.5161523 | 4.7261739  | 90.2562586 |
| C  | -2.4617733 | 2.9061501  | 88.1140172 |
| C  | -2.8652739 | 4.2409247  | 87.9160736 |
| C  | -2.8956345 | 5.1767124  | 88.9615644 |
| H  | -2.6207962 | 5.4230296  | 91.1040232 |
| C  | -2.4472172 | 1.9637877  | 86.9155048 |
| H  | -3.1449289 | 4.5634741  | 86.9034409 |
| C  | -1.6252987 | 2.5251351  | 85.7411153 |
| H  | -2.1022358 | 3.4246233  | 85.2982360 |
| H  | -1.5450604 | 1.7674170  | 84.9350931 |
| H  | -0.6011808 | 2.7965290  | 86.0632961 |
| C  | -3.8875682 | 1.6175610  | 86.4909271 |
| H  | -1.9652424 | 1.0193764  | 87.2381082 |
| H  | -4.4378305 | 2.5218742  | 86.1557945 |
| H  | -4.4581068 | 1.1658147  | 87.3275959 |
| H  | -3.8812729 | 0.8950721  | 85.6490684 |
| C  | -3.3706476 | 6.6120673  | 88.7829072 |
| C  | -3.1129007 | 7.1824907  | 87.3824986 |
| H  | -3.3696968 | 8.2603210  | 87.3579880 |

|   |            |           |            |
|---|------------|-----------|------------|
| H | -3.7349930 | 6.6818645 | 86.6110898 |
| H | -2.0486927 | 7.0714553 | 87.0957941 |
| C | -4.8597394 | 6.7177523 | 89.1705188 |
| H | -2.7878612 | 7.2230258 | 89.5088911 |
| H | -5.2027046 | 7.7710378 | 89.1134067 |
| H | -5.0403031 | 6.3540630 | 90.2021489 |
| H | -5.4884254 | 6.1139477 | 88.4828696 |
| C | -1.8455374 | 2.9688316 | 91.9522192 |
| C | -0.8651018 | 3.9040047 | 92.6787860 |
| H | -0.6933121 | 3.5366682 | 93.7108304 |
| H | -1.2389796 | 4.9453563 | 92.7597259 |
| H | 0.1142962  | 3.9268004 | 92.1615523 |
| C | -3.1700944 | 2.8313002 | 92.7304387 |
| H | -1.3699590 | 1.9696781 | 91.9212344 |
| H | -2.9782742 | 2.4588158 | 93.7573820 |
| H | -3.8680746 | 2.1271950 | 92.2336686 |
| H | -3.6866906 | 3.8103880 | 92.8158830 |
| H | 6.8319586  | 6.1328569 | 86.8026040 |
| H | 7.3626932  | 2.4620069 | 91.4457344 |
| H | 5.3987724  | 0.7336372 | 84.0073590 |
| C | 6.8292256  | 5.8809958 | 87.8866254 |
| H | 4.4489456  | 2.4357234 | 92.7806711 |
| H | 6.4218317  | 7.9646624 | 88.4563642 |
| H | 3.3516348  | 2.2837263 | 83.9374079 |
| C | 6.1962016  | 4.5011166 | 88.0165858 |
| C | 6.6884379  | 1.5875345 | 91.3287297 |
| C | 5.9937295  | 6.9526036 | 88.6112862 |
| H | 5.9606602  | 6.7653305 | 89.7047716 |
| C | 6.0402857  | 3.8856976 | 89.2716596 |
| C | 5.7644026  | 1.2581865 | 84.9148640 |
| H | 8.8997723  | 5.1428469 | 87.8257522 |
| C | 5.7277081  | 3.8132139 | 86.8863000 |
| C | 8.2903995  | 5.8924625 | 88.3697593 |
| H | 8.7513845  | 6.8902672 | 88.2162678 |
| H | 5.8430921  | 4.2858005 | 85.8972353 |
| C | 4.5875497  | 2.9463756 | 91.8051605 |
| H | 6.6027080  | 1.0930731 | 92.3188139 |
| H | 7.1777131  | 0.8779501 | 90.6306811 |
| C | 5.4175157  | 2.6341834 | 89.4166893 |
| C | 3.7877380  | 2.8446680 | 84.7901165 |
| C | 5.0932534  | 2.5593975 | 86.9732353 |
| H | 6.3209069  | 0.5251565 | 85.5331472 |
| H | 6.4889665  | 2.0343416 | 84.5890088 |
| C | 5.3034352  | 2.0174975 | 90.8090040 |
| C | 4.9367891  | 1.9643991 | 88.2580496 |
| C | 4.5938930  | 1.8934107 | 85.6902447 |
| H | 3.5897988  | 3.2402954 | 91.4246749 |
| H | 2.9675998  | 3.3163576 | 85.3633052 |
| H | 5.1723949  | 3.8701029 | 91.9977749 |
| H | 4.9453112  | 6.9641667 | 88.2482615 |
| H | 4.4198535  | 3.6485367 | 84.3586715 |
| H | 8.3565370  | 5.6573919 | 89.4527535 |
| H | 4.6917835  | 1.0965867 | 90.7192250 |
| H | 3.9051131  | 1.0770891 | 85.9862449 |
| H | 6.4077114  | 4.4016215 | 90.1734390 |
| H | 2.0155713  | 6.0040986 | 88.0505143 |

|    |            |            |            |
|----|------------|------------|------------|
| Zn | -0.3206902 | 5.3646652  | 89.7492136 |
| Br | -0.1160477 | 7.3475738  | 90.9488143 |
| C  | 0.9626698  | 6.1412166  | 83.5909044 |
| C  | 0.5816538  | 5.9904114  | 84.9272307 |
| C  | 1.5579993  | 6.0638653  | 85.9460451 |
| C  | 2.9132088  | 6.2780290  | 85.6153139 |
| C  | 3.2887616  | 6.4369995  | 84.2764381 |
| C  | 2.3143958  | 6.3685009  | 83.2660503 |
| H  | 0.2086927  | 6.0799104  | 82.7916185 |
| H  | -0.4653773 | 5.8045122  | 85.2096144 |
| C  | 1.1910037  | 5.8999859  | 87.3521599 |
| H  | 3.6697565  | 6.2904979  | 86.4152175 |
| H  | 4.3452636  | 6.6007867  | 84.0161294 |
| H  | 2.6103126  | 6.4857571  | 82.2120446 |
| O  | 0.0081269  | 5.7760327  | 87.7363061 |
| C  | -0.1883119 | 0.8715506  | 89.1220060 |
| C  | 0.5930023  | -0.2376802 | 89.4709378 |
| C  | 0.0392015  | -1.1809063 | 90.4143715 |
| C  | 0.7999546  | -2.2485978 | 90.9792760 |
| C  | -1.3334638 | -1.0281977 | 90.8388501 |
| C  | -1.9001152 | -1.9878884 | 91.7302017 |
| C  | -2.0760935 | 0.1166452  | 90.4275102 |
| H  | -3.1011156 | 0.2487555  | 90.8074167 |
| C  | -1.5059076 | 1.1025170  | 89.6335254 |
| C  | 4.1588373  | 0.6937638  | 88.3777076 |
| C  | 4.6207577  | -0.5175081 | 87.8789474 |
| H  | 5.6470848  | -0.5805365 | 87.4861046 |
| C  | 3.7775254  | -1.6613771 | 87.7824436 |
| C  | 4.2422295  | -2.8670786 | 87.1766220 |
| C  | 2.4089977  | -1.5797639 | 88.2357872 |
| C  | 1.5503184  | -2.6904526 | 87.9758867 |
| C  | 1.9596114  | -0.3735144 | 88.8917538 |
| C  | 2.8373037  | 0.7200051  | 88.9275096 |
| O  | 0.2966987  | 1.7950330  | 88.2202602 |
| O  | 2.4386015  | 1.8946716  | 89.5446457 |
| P  | 1.4279298  | 2.9145743  | 88.7193725 |
| O  | 0.8412534  | 3.7948955  | 89.8531600 |
| O  | 1.9996235  | 3.5519248  | 87.4800984 |
| C  | -1.1421265 | -3.0368412 | 92.2272369 |
| C  | 0.2248334  | -3.1528703 | 91.8612723 |
| H  | -2.9519510 | -1.8649365 | 92.0333280 |
| H  | -1.5902171 | -3.7655687 | 92.9196936 |
| H  | 1.8610947  | -2.3461796 | 90.7126076 |
| H  | 0.8373352  | -3.9634517 | 92.2847965 |
| C  | 2.0280297  | -3.8416365 | 87.3647151 |
| C  | 3.3903596  | -3.9426402 | 86.9780149 |
| H  | 0.4907091  | -2.6249253 | 88.2580180 |
| H  | 1.3412151  | -4.6802366 | 87.1730379 |
| H  | 3.7610004  | -4.8638066 | 86.5031248 |
| H  | 5.2926881  | -2.9168681 | 86.8490741 |
| C  | -2.1677625 | 3.3602710  | 90.5135492 |
| C  | -2.1079569 | 2.4544547  | 89.4144516 |
| C  | -2.5397574 | 4.7068779  | 90.2622514 |
| C  | -2.4638333 | 2.9003552  | 88.1104482 |
| C  | -2.8647459 | 4.2361376  | 87.9171558 |
| C  | -2.9057992 | 5.1658206  | 88.9677908 |
| H  | -2.6424882 | 5.4016517  | 91.1117774 |
| C  | -2.4422420 | 1.9639911  | 86.9069351 |
| H  | -3.1341444 | 4.5647798  | 86.9037118 |
| C  | -1.6182192 | 2.5317636  | 85.7373501 |
| H  | -2.0957467 | 3.4317648  | 85.2957788 |
| H  | -1.5330950 | 1.7780075  | 84.9282643 |
| H  | -0.5953171 | 2.8030926  | 86.0627993 |
| C  | -3.8801693 | 1.6149562  | 86.4769925 |
| H  | -1.9581055 | 1.0197805  | 87.2266622 |
| H  | -4.4335906 | 2.5188665  | 86.1460743 |
| H  | -4.4513509 | 1.1571128  | 87.3097267 |
| H  | -3.8708273 | 0.8972740  | 85.6310589 |
| C  | -3.3768325 | 6.6032511  | 88.7936036 |
| C  | -3.1142998 | 7.1785014  | 87.3962263 |
| H  | -3.3661812 | 8.2575144  | 87.3752418 |

## 12d-mi

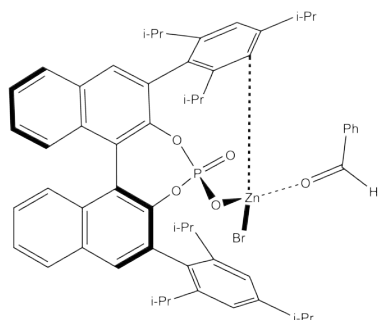

Energy (Hartree) = -7274.231097117

|   |            |           |            |    |            |            |            |
|---|------------|-----------|------------|----|------------|------------|------------|
| H | -3.7371626 | 6.6847654 | 86.6207215 | Zn | 0.1144447  | 5.4220625  | 90.0457877 |
| H | -2.0496927 | 7.0654311 | 87.1122099 | Br | 0.3756433  | 7.2705382  | 91.4913783 |
| C | -4.8658842 | 6.7135784 | 89.1789009 | C  | 0.0027338  | 0.9233097  | 89.2046662 |
| H | -2.7912424 | 7.2093862 | 89.5216106 | C  | 0.7544260  | -0.2140884 | 89.5293557 |
| H | -5.2055547 | 7.7681699 | 89.1264730 | C  | 0.1863607  | -1.1483795 | 90.4744297 |
| H | -5.0502308 | 6.3459464 | 90.2083781 | C  | 0.9223274  | -2.2431737 | 91.0207858 |
| H | -5.4968845 | 6.1152689 | 88.4885694 | C  | -1.1753342 | -0.9589987 | 90.9203548 |
| C | -1.8732726 | 2.9464633 | 91.9539998 | C  | -1.7597698 | -1.9110310 | 91.8091474 |
| C | -0.8710814 | 3.8639601 | 92.6739822 | C  | -1.8871342 | 0.2158157  | 90.5381293 |
| H | -0.7075293 | 3.5013783 | 93.7090893 | H  | -2.9007096 | 0.3755224  | 90.9380515 |
| H | -1.2172022 | 4.9155828 | 92.7458318 | C  | -1.2955166 | 1.1932484  | 89.7495539 |
| H | 0.1083027  | 3.8589950 | 92.1566550 | C  | 4.3377728  | 0.6050533  | 88.3964841 |
| C | -3.1970135 | 2.8343759 | 92.7369950 | C  | 4.7586534  | -0.6220940 | 87.8999399 |
| H | -1.4172895 | 1.9383102 | 91.9237599 | H  | 5.7806604  | -0.7217672 | 87.5028938 |
| H | -3.0096553 | 2.4600437 | 93.7640966 | C  | 3.8763300  | -1.7372635 | 87.8086185 |
| H | -3.9097295 | 2.1425840 | 92.2435750 | C  | 4.2980030  | -2.9581139 | 87.2004945 |
| H | -3.6967773 | 3.8219931 | 92.8237996 | C  | 2.5132741  | -1.6096326 | 88.2688550 |
| H | 6.8015608  | 6.1367307 | 86.7591165 | C  | 1.6165204  | -2.6910316 | 88.0121503 |
| H | 7.3457473  | 2.5024835 | 91.4321647 | C  | 2.1070932  | -0.3888181 | 88.9270950 |
| H | 5.3923845  | 0.7167819 | 84.0042733 | C  | 3.0185098  | 0.6785791  | 88.9508904 |
| C | 6.8259690  | 5.8820273 | 87.8425900 | O  | 0.4911572  | 1.8309881  | 88.2937789 |
| H | 4.4317859  | 2.4877272 | 92.7701068 | O  | 2.6628192  | 1.8646964  | 89.5638272 |
| H | 6.4718398  | 7.9711839 | 88.4277318 | P  | 1.6760796  | 2.9244085  | 88.7425828 |
| H | 3.3273521  | 2.2464819 | 83.9352423 | O  | 1.1508811  | 3.7977550  | 89.9152319 |
| C | 6.1799376  | 4.5094170 | 87.9863715 | O  | 2.2327665  | 3.5106920  | 87.4825036 |
| C | 6.6708317  | 1.6275648 | 91.3235622 | C  | -1.0267912 | -2.9874978 | 92.2862230 |
| C | 6.0315463  | 6.9661703 | 88.5935106 | C  | 0.3322173  | -3.1901026 | 91.9023058 |
| H | 6.0278394  | 6.7790111 | 89.6872802 | H  | -2.8034041 | -1.7596905 | 92.1275247 |
| C | 6.0200205  | 3.9076317 | 89.2472015 | H  | -1.4874685 | -3.7099552 | 92.9771129 |
| C | 5.7560570  | 1.2499617 | 84.9073858 | H  | 1.9771890  | -2.3698683 | 90.7414807 |
| H | 8.8807724  | 5.1100562 | 87.7167013 | H  | 0.9263753  | -3.9707940 | 92.3110104 |
| C | 5.7145282  | 3.8095636 | 86.8625152 | C  | 2.0519430  | -3.8576381 | 87.3974233 |
| C | 8.3011346  | 5.8673431 | 88.2816208 | C  | 3.4089998  | -4.0046531 | 87.0049211 |
| H | 8.7751934  | 6.8578456 | 88.1206862 | O  | 0.5605725  | -2.5905303 | 88.2982907 |
| H | 5.8342770  | 4.2700604 | 85.8681843 | H  | 1.3360858  | -4.6721523 | 87.2076131 |
| C | 4.5693608  | 2.9897901 | 91.7901766 | H  | 3.7461385  | -4.9376362 | 86.5279248 |
| H | 6.5867631  | 1.1417310 | 92.3179684 | H  | 5.3448376  | -3.0433662 | 86.8684572 |
| H | 7.1596365  | 0.9126345 | 90.6309856 | C  | -1.8445544 | 3.4508377  | 90.7012114 |
| C | 5.3993003  | 2.6568690 | 89.4039863 | C  | -1.8318052 | 2.5784466  | 89.5752017 |
| C | 3.7631241  | 2.8161396 | 84.7820651 | C  | -2.1139774 | 4.8295520  | 90.4896828 |
| C | 5.0804468  | 2.5566102 | 86.9608690 | C  | -2.1471169 | 3.0865524  | 88.2827609 |
| H | 6.3221881  | 0.5261316 | 85.5275993 | C  | -2.4292497 | 4.4566376  | 88.1227293 |
| H | 6.4729137  | 2.0301621 | 84.5746485 | C  | -2.4171447 | 5.3555573  | 89.2020361 |
| C | 5.2852969  | 2.0530266 | 90.8018259 | H  | -2.2028243 | 5.4959601  | 91.3635220 |
| C | 4.9228911  | 1.9744940 | 88.2511493 | C  | -2.2278032 | 2.1754685  | 87.0631588 |
| C | 4.5827708  | 1.8781726 | 85.6837542 | H  | -2.6633304 | 4.8318817  | 87.1169788 |
| C | 3.5707415  | 3.2797958 | 91.4096043 | C  | -1.4171188 | 2.7065519  | 85.8685082 |
| H | 2.9410823  | 3.2831031 | 85.3564192 | H  | -1.8587012 | 3.6351182  | 85.4498930 |
| H | 5.1527089  | 3.9159254 | 91.9752848 | H  | -1.4064537 | 1.9549384  | 85.0529871 |
| H | 4.9726383  | 6.9972559 | 88.2640671 | H  | -0.3696276 | 2.9169838  | 86.1596732 |
| H | 4.3852809  | 3.6230949 | 84.3418523 | C  | -3.7035151 | 1.9323548  | 86.6887243 |
| H | 8.3945557  | 5.6233393 | 89.3604894 | H  | -1.7978508 | 1.1953279  | 87.3500794 |
| H | 4.6737427  | 1.1313679 | 90.7202567 | H  | -4.2048132 | 2.8785048  | 86.3946926 |
| H | 3.9027367  | 1.0572202 | 85.9864613 | H  | -4.2706055 | 1.4989079  | 87.5373945 |
| H | 6.3852566  | 4.4324736 | 90.1446222 | H  | -3.7757924 | 1.2308858  | 85.8322397 |
| H | 2.0224765  | 5.9794472 | 88.0916022 | C  | -2.7893426 | 6.8271079  | 89.0650693 |
|   |            |           |            | C  | -2.5921924 | 7.3892110  | 87.6522107 |
|   |            |           |            | H  | -2.7421776 | 8.4872190  | 87.6542217 |
|   |            |           |            | H  | -3.3225221 | 6.9619789  | 86.9337549 |
|   |            |           |            | H  | -1.5744496 | 7.1797134  | 87.2681117 |
|   |            |           |            | C  | -4.2346030 | 7.0490550  | 89.5560920 |
|   |            |           |            | H  | -2.1142709 | 7.3845751  | 89.7543341 |
|   |            |           |            | H  | -4.4950044 | 8.1266597  | 89.5236702 |
|   |            |           |            | H  | -4.3721084 | 6.6957910  | 90.5976339 |
|   |            |           |            | H  | -4.9551379 | 6.5014229  | 88.9131958 |
|   |            |           |            | C  | -1.5915701 | 2.9740528  | 92.1294222 |
|   |            |           |            | C  | -0.4763914 | 3.7504655  | 92.8484418 |
|   |            |           |            | H  | -0.3174606 | 3.3294676  | 93.8620035 |
|   |            |           |            | H  | -0.7125783 | 4.8274604  | 92.9726957 |
|   |            |           |            | H  | 0.4792727  | 3.6664599  | 92.2929438 |
|   |            |           |            | C  | -2.9087614 | 2.9974327  | 92.9295319 |

## 12j-ma; COSMO

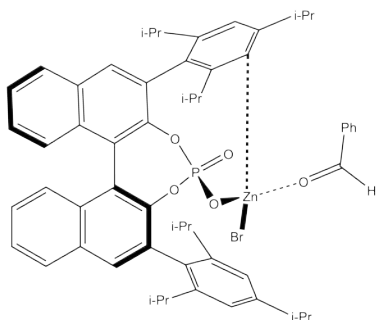

Energy (Hartree) = -7274.235090686

|   |            |           |            |    |            |            |            |
|---|------------|-----------|------------|----|------------|------------|------------|
| H | -1.2574223 | 1.9210922 | 92.0733361 | Zn | 0.0989982  | 5.4261790  | 90.0568008 |
| H | -2.7502023 | 2.5837724 | 93.9463945 | Br | 0.3007913  | 7.2906501  | 91.4761170 |
| H | -3.6989298 | 2.3977146 | 92.4332318 | C  | -0.0060158 | 0.9237497  | 89.2055843 |
| H | -3.2942754 | 4.0323968 | 93.0431522 | C  | 0.7516645  | -0.2091923 | 89.5313378 |
| H | 7.0248149  | 6.0061286 | 86.7232760 | C  | 0.1900132  | -1.1443426 | 90.4791691 |
| H | 7.5570843  | 2.4027636 | 91.4259470 | C  | 0.9327641  | -2.2339402 | 91.0260561 |
| H | 5.6556033  | 0.5739114 | 84.0164823 | C  | -1.1719924 | -0.9624522 | 90.9265283 |
| C | 6.9882651  | 5.7921682 | 87.8147043 | C  | -1.7491822 | -1.9167675 | 91.8168461 |
| H | 4.6463435  | 2.4340562 | 92.7760842 | C  | -1.8901565 | 0.2075330  | 90.5428647 |
| H | 6.4783530  | 7.8779686 | 88.2835053 | H  | -2.9042985 | 0.3631051  | 90.9433184 |
| H | 3.5677091  | 2.0741822 | 83.9341836 | C  | -1.3050824 | 1.1870456  | 89.7522016 |
| C | 6.3893726  | 4.4000158 | 87.9698431 | C  | 4.3289452  | 0.6209325  | 88.3895772 |
| C | 6.8712294  | 1.5346770 | 91.3302174 | C  | 4.7530884  | -0.6064120 | 87.8968897 |
| C | 6.0823839  | 6.8563845 | 88.4619783 | H  | 5.7754443  | -0.7023035 | 87.4998696 |
| H | 6.0131158  | 6.7082561 | 89.5600757 | C  | 3.8753163  | -1.7249162 | 87.8097783 |
| C | 6.2269719  | 3.8108676 | 89.2365918 | C  | 4.2998091  | -2.9461661 | 87.2056652 |
| C | 6.0092789  | 1.1176736 | 84.9174413 | C  | 2.5129006  | -1.6004400 | 88.2717229 |
| H | 9.0839833  | 5.1258664 | 87.8664475 | C  | 1.6199495  | -2.6858531 | 88.0203723 |
| C | 5.9415224  | 3.6803866 | 86.8517180 | C  | 2.1034962  | -0.3791392 | 88.9267685 |
| C | 8.4262265  | 5.8726573 | 88.3555535 | C  | 3.0101733  | 0.6922653  | 88.9448841 |
| H | 8.8588763  | 6.8800510 | 88.1827026 | O  | 0.4749975  | 1.8325804  | 88.2927899 |
| H | 6.0657614  | 4.1314521 | 85.8539822 | O  | 2.6519691  | 1.8797437  | 89.5535933 |
| C | 4.7905151  | 2.9279606 | 91.7927354 | P  | 1.6563771  | 2.9313668  | 88.7357347 |
| H | 6.7849056  | 1.0606902 | 92.3303106 | O  | 1.1281027  | 3.8033647  | 89.9086779 |
| H | 7.3474965  | 0.8055001 | 90.6434476 | O  | 2.2039348  | 3.5233533  | 87.4740393 |
| C | 5.6070768  | 2.5609180 | 89.4048691 | C  | -1.0098962 | -2.9880670 | 92.2941275 |
| C | 3.9903188  | 2.6536761 | 84.7810829 | C  | 0.3489440  | -3.1320417 | 91.9087723 |
| C | 5.3095134  | 2.4275189 | 86.9615153 | H  | -2.7933259 | -1.7710662 | 92.1362484 |
| H | 6.5814943  | 0.4048975 | 85.5453453 | H  | -1.4657028 | -3.7123089 | 92.9862888 |
| H | 6.7170408  | 1.9052735 | 84.5821570 | H  | 1.9876617  | -2.3540618 | 90.7445269 |
| C | 5.4890342  | 1.9728196 | 90.8092932 | H  | 0.9485268  | -3.9597403 | 92.3174760 |
| C | 5.1338714  | 1.8646567 | 88.2582989 | C  | 2.0586915  | -3.8529314 | 87.4099867 |
| C | 4.8257843  | 1.7337326 | 85.6875894 | C  | 3.4149716  | -3.9964927 | 87.0157694 |
| H | 3.7966425  | 3.2316655 | 91.4099169 | H  | 0.5643588  | -2.5873581 | 88.3080725 |
| H | 3.1585983  | 3.1017741 | 85.3577917 | H  | 1.3454109  | -4.6706661 | 87.2247183 |
| H | 5.3906538  | 3.8447679 | 91.9709865 | H  | 3.7548908  | -4.9299259 | 86.5417843 |
| H | 5.0546602  | 6.8087721 | 88.0506622 | H  | 5.3463060  | -3.0284183 | 86.8719004 |
| H | 4.6036297  | 3.4678710 | 84.3397799 | C  | -1.8694695 | 3.4426594  | 90.7006705 |
| H | 8.4560906  | 5.6817113 | 89.4488148 | C  | -1.8489889 | 2.5686657  | 89.5760307 |
| H | 4.8652465  | 1.0584227 | 90.7388687 | C  | -2.1440407 | 4.8192181  | 90.4860763 |
| H | 4.1575706  | 0.9041884 | 85.9921943 | C  | -2.1621078 | 3.0735350  | 88.2818307 |
| H | 6.5817496  | 4.3499022 | 90.1298223 | C  | -2.4461804 | 4.4425480  | 88.1189364 |
| C | 3.7481531  | 6.5667761 | 85.2428557 | C  | -2.4409416 | 5.3429590  | 89.1969174 |
| C | 2.7679396  | 6.3487942 | 86.2153906 | H  | -2.2314459 | 5.4886040  | 91.3576678 |
| C | 2.3453332  | 7.4347849 | 87.0239480 | C  | -2.2388160 | 2.1593106  | 87.0640554 |
| C | 2.9175536  | 8.7203390 | 86.8608951 | H  | -2.6751962 | 4.8157639  | 87.1112392 |
| C | 3.8889691  | 8.9275116 | 85.8758134 | C  | -1.4330728 | 2.6904705  | 85.8664557 |
| C | 4.3012503  | 7.8504653 | 85.0682298 | H  | -1.8792928 | 3.6154513  | 85.4446454 |
| H | 4.0979235  | 5.7265665 | 84.6253598 | H  | -1.4196841 | 1.9367201  | 85.0531245 |
| H | 2.3616027  | 5.3442758 | 86.4211137 | H  | -0.3857514 | 2.9057140  | 86.1538970 |
| C | 1.3669944  | 7.2211729 | 88.0801005 | C  | -3.7138070 | 1.9064695  | 86.6937240 |
| H | 2.5937278  | 9.5477484 | 87.5122714 | H  | -1.8024246 | 1.1827108  | 87.3530324 |
| H | 4.3360927  | 9.9234312 | 85.7391868 | H  | -4.2222347 | 2.8487217  | 86.3994747 |
| H | 5.0750816  | 8.0111129 | 84.3013889 | H  | -4.2765482 | 1.4715760  | 87.5444024 |
| O | 0.7169362  | 6.1643356 | 88.2032134 | H  | -3.7851368 | 1.2032413  | 85.8386392 |
| H | 1.2263158  | 8.0434873 | 88.8286581 | C  | -2.8118150 | 6.8144542  | 89.0558264 |
|   |            |           |            | C  | -2.5986064 | 7.3755841  | 87.6449030 |
|   |            |           |            | H  | -2.7458518 | 8.4740428  | 87.6437526 |
|   |            |           |            | H  | -3.3219364 | 6.9507251  | 86.9178912 |
|   |            |           |            | H  | -1.5772640 | 7.1628999  | 87.2723407 |
|   |            |           |            | C  | -4.2614665 | 7.0387091  | 89.5315408 |
|   |            |           |            | H  | -2.1422943 | 7.3712856  | 89.7510645 |
|   |            |           |            | H  | -4.5212126 | 8.1164592  | 89.4977759 |
|   |            |           |            | H  | -4.4103989 | 6.6850567  | 90.5712834 |
|   |            |           |            | H  | -4.9771347 | 6.4922883  | 88.8822279 |
|   |            |           |            | C  | -1.6130293 | 2.9713010  | 92.1304416 |
|   |            |           |            | C  | -0.4830254 | 3.7394855  | 92.8356185 |
|   |            |           |            | H  | -0.3236840 | 3.3274888  | 93.8528212 |
|   |            |           |            | H  | -0.7017133 | 4.8213949  | 92.9499688 |
|   |            |           |            | H  | 0.4684724  | 3.6354207  | 92.2766716 |
|   |            |           |            | C  | -2.9234317 | 3.0135024  | 92.9402896 |

12j-ma

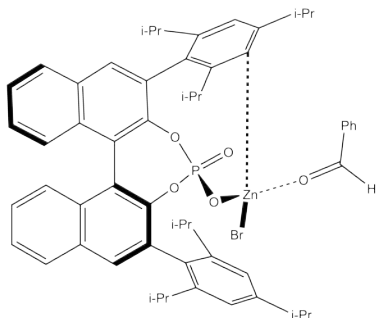

Energy (Hartree) = -7274.225769422

|   |            |           |            |    |            |            |            |
|---|------------|-----------|------------|----|------------|------------|------------|
| H | -1.2912138 | 1.9143393 | 92.0780857 | Zn | 1.3878586  | 5.3428809  | 90.1327029 |
| H | -2.7628735 | 2.6030016 | 93.9581036 | Br | 3.1233975  | 6.2254475  | 91.3454450 |
| H | -3.7246087 | 2.4209822 | 92.4529796 | C  | 2.4795674  | 6.3896147  | 85.9709432 |
| H | -3.2974577 | 4.0526973 | 93.0532473 | C  | 1.6505392  | 6.4351524  | 87.0931953 |
| H | 7.0305263  | 6.0110214 | 86.7070350 | C  | 1.1305144  | 7.6749832  | 87.5423339 |
| H | 7.5502495  | 2.4116572 | 91.4139367 | C  | 1.4293383  | 8.8635668  | 86.8294732 |
| H | 5.6404961  | 0.5836465 | 84.0063766 | C  | 2.2735388  | 8.8139781  | 85.7150958 |
| C | 7.0116838  | 5.7906022 | 87.7978571 | C  | 2.8003544  | 7.5795767  | 85.2897249 |
| H | 4.6381460  | 2.4587235 | 92.7654805 | H  | 2.8670628  | 5.4157042  | 85.6379985 |
| H | 6.5481991  | 7.8824083 | 88.2889606 | H  | 1.3682749  | 5.4875405  | 87.5736054 |
| C | 3.5527856  | 2.0863148 | 83.9284934 | C  | 0.2955226  | 7.7697645  | 88.7319896 |
| C | 6.3948612  | 4.4066444 | 87.9556546 | H  | 1.0104709  | 9.8236071  | 87.1705418 |
| C | 6.8596394  | 1.5472796 | 91.3201697 | H  | 2.5221786  | 9.7370960  | 85.1707765 |
| C | 6.1385860  | 6.8665594 | 88.4694334 | H  | 3.4608280  | 7.5439025  | 84.4095973 |
| H | 6.0885753  | 6.7144405 | 89.5678242 | O  | 0.1588858  | 6.8951673  | 89.6111131 |
| C | 6.2269577  | 3.8220155 | 89.2233501 | C  | -0.1542088 | 0.8095250  | 89.0362238 |
| C | 5.9962883  | 1.1277002 | 84.9062221 | C  | 0.6584770  | -0.2729237 | 89.3950799 |
| H | 9.0951697  | 5.0867446 | 87.8017066 | C  | 0.2161154  | -1.1211716 | 90.4780791 |
| C | 5.9426050  | 3.6878260 | 86.8392219 | C  | 1.0221945  | -2.1611163 | 91.0331042 |
| C | 8.4616139  | 5.8414822 | 88.3095890 | C  | -1.0853080 | -0.8885890 | 91.0622582 |
| H | 8.9096355  | 6.8422559 | 88.1373567 | C  | -1.5498105 | -1.7508129 | 92.1009559 |
| H | 6.0726937  | 4.1345552 | 85.8402110 | C  | -1.8522642 | 0.2408744  | 90.6523543 |
| C | 4.7844201  | 2.9502771 | 91.7814276 | H  | -2.8134351 | 0.4392497  | 91.1524064 |
| H | 6.7722591  | 1.0752661 | 92.3210272 | C  | -1.3844760 | 1.1333986  | 89.6956380 |
| H | 7.3321855  | 0.8154238 | 90.6340062 | C  | 4.2130314  | 0.5683841  | 88.2158671 |
| C | 5.6002189  | 2.5762688 | 89.3943334 | C  | 4.6603544  | -0.6635062 | 87.7569149 |
| C | 3.9784535  | 2.6651059 | 84.7741121 | H  | 5.7002204  | -0.7688752 | 87.4111506 |
| C | 5.3028633  | 2.4393823 | 86.9513178 | C  | 3.7930472  | -1.7937002 | 87.6830011 |
| H | 6.5697773  | 0.4152817 | 85.5330934 | C  | 4.2403865  | -3.0293947 | 87.1256868 |
| H | 6.7049575  | 1.9136079 | 84.5692842 | C  | 2.4305514  | -1.6863273 | 88.1520817 |
| C | 5.4792790  | 1.9911301 | 90.7996390 | C  | 1.5663115  | -2.8094273 | 87.9806863 |
| C | 5.1244420  | 1.8803298 | 88.2489672 | C  | 1.9860399  | -0.4441545 | 88.7361260 |
| C | 4.8155245  | 1.7452037 | 85.6789592 | C  | 2.8636978  | 0.6471853  | 88.6872743 |
| H | 3.7915341  | 3.2573407 | 91.3992878 | O  | 0.2261170  | 1.6139297  | 87.9762448 |
| H | 3.1474956  | 3.1136555 | 85.3514508 | O  | 2.4409592  | 1.8791307  | 89.1595398 |
| H | 5.3871284  | 3.8654635 | 91.9590048 | P  | 1.4091692  | 2.7519782  | 88.1898982 |
| H | 5.1015978  | 6.8391005 | 88.0803564 | O  | 0.8497289  | 3.8191574  | 89.1728601 |
| H | 4.5919011  | 3.4779083 | 84.3298832 | O  | 1.9272209  | 3.1810812  | 86.8521260 |
| H | 8.5098857  | 5.6391610 | 89.4000179 | C  | -0.7556569 | -2.7792402 | 92.5859577 |
| H | 4.8513882  | 1.0795434 | 90.7305960 | C  | 0.5488708  | -2.9698680 | 92.0578881 |
| H | 4.1467080  | 0.9168126 | 85.9852443 | H  | -2.5501201 | -1.5688480 | 92.5249738 |
| H | 6.5850864  | 4.3602628 | 90.1156719 | H  | -1.1244573 | -3.4327881 | 93.3912305 |
| C | 3.7659626  | 6.5665461 | 85.2661434 | H  | 2.0379382  | -2.3167128 | 90.6453963 |
| C | 2.7805367  | 6.3506509 | 86.2340712 | H  | 1.1945269  | -3.7618626 | 92.4674086 |
| C | 2.3766624  | 7.4306412 | 87.0590239 | C  | 2.0284369  | -3.9914270 | 87.4173875 |
| C | 2.9724238  | 8.7074653 | 86.9171062 | C  | 3.3806238  | -4.1107714 | 86.9987506 |
| C | 3.9473755  | 8.9135517 | 85.9358294 | H  | 0.5155385  | -2.7257064 | 88.2925933 |
| C | 4.3411318  | 7.8423337 | 85.1118264 | H  | 1.3391956  | -4.8402103 | 87.2895209 |
| H | 4.1005401  | 5.7281828 | 84.6379674 | H  | 3.7389066  | -5.0549358 | 86.5607688 |
| H | 2.3563063  | 5.3502042 | 86.4239857 | H  | 5.2846027  | -3.1021557 | 86.7826462 |
| C | 1.3913690  | 7.2157466 | 88.1102109 | C  | -1.9445731 | 3.4771034  | 90.4308391 |
| H | 2.6640383  | 9.5294628 | 87.5828844 | C  | -2.0115844 | 2.4650647  | 89.4288645 |
| H | 4.4127158  | 9.9032315 | 85.8157297 | C  | -2.3704967 | 4.7782316  | 90.1055654 |
| H | 5.1189325  | 8.0015095 | 84.3486246 | C  | -2.5377136 | 2.7774029  | 88.1451237 |
| O | 0.7151132  | 6.1743362 | 88.2068965 | C  | -2.9565892 | 4.0923961  | 87.8769557 |
| H | 1.2688511  | 8.0213069 | 88.8814659 | C  | -2.8602122 | 5.1168135  | 88.8337250 |
|   |            |           |            | H  | -2.2998240 | 5.5733431  | 90.8662951 |
|   |            |           |            | C  | -2.6942098 | 1.7150422  | 87.0597326 |
|   |            |           |            | H  | -3.3594712 | 4.3235988  | 86.8788076 |
|   |            |           |            | C  | -2.0510683 | 2.1313743  | 85.7255326 |
|   |            |           |            | H  | -2.5780258 | 2.9942422  | 85.2668228 |
|   |            |           |            | H  | -2.0977048 | 1.2952903  | 84.9976194 |
|   |            |           |            | H  | -0.9879062 | 2.4079666  | 85.8652718 |
|   |            |           |            | C  | -4.1791553 | 1.3440320  | 86.8815750 |
|   |            |           |            | H  | -2.1718338 | 0.8007679  | 87.4069377 |
|   |            |           |            | H  | -4.7720765 | 2.2172857  | 86.5364149 |
|   |            |           |            | H  | -4.6235002 | 0.9920834  | 87.8348714 |
|   |            |           |            | H  | -4.2962606 | 0.5371144  | 86.1285281 |
|   |            |           |            | C  | -3.3017686 | 6.5436475  | 88.5330703 |
|   |            |           |            | C  | -2.8291913 | 7.0400191  | 87.1565895 |
|   |            |           |            | H  | -3.0455426 | 8.1211278  | 87.0325878 |

## 12j-mi; COSMO

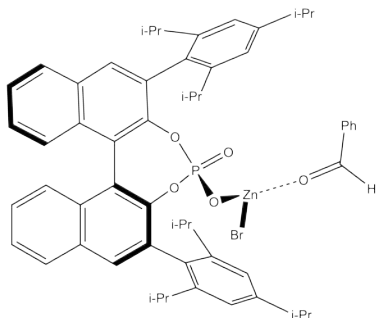

Energy (Hartree)= -7274.220915627

|   |            |           |            |    |            |            |            |
|---|------------|-----------|------------|----|------------|------------|------------|
| H | -3.3451488 | 6.5079323 | 86.3306008 | Zn | 1.4513559  | 5.3297808  | 90.1351440 |
| H | -1.7403476 | 6.8841001 | 87.0143425 | Br | 3.1238301  | 6.2523783  | 91.3887003 |
| C | -4.8289349 | 6.6871735 | 88.6793303 | C  | 2.4490116  | 6.3206815  | 85.8995455 |
| H | -2.8299360 | 7.1892826 | 89.3069655 | C  | 1.6524400  | 6.3903753  | 87.0442353 |
| H | -5.1506952 | 7.7362329 | 88.5111395 | C  | 1.1507497  | 7.6391386  | 87.4864179 |
| H | -5.1663879 | 6.3798773 | 89.6896257 | C  | 1.4360159  | 8.8138620  | 86.7462262 |
| H | -5.3546618 | 6.0466410 | 87.9403164 | C  | 2.2470250  | 8.7413657  | 85.6093392 |
| C | -1.4106178 | 3.2296481 | 91.8442940 | C  | 2.7547851  | 7.4968961  | 85.1897970 |
| C | -0.1755518 | 4.0866002 | 92.1825155 | H  | 2.8219893  | 5.3377704  | 85.5766230 |
| H | 0.1154342  | 3.9871220 | 93.2477506 | H  | 1.3843295  | 5.4525786  | 87.5507263 |
| H | -0.3602368 | 5.1712086 | 92.0112311 | C  | 0.3447354  | 7.7524811  | 88.6957176 |
| H | 0.6993409  | 3.7338504 | 91.5952461 | H  | 1.0318336  | 9.7819528  | 87.0830599 |
| C | -2.5235162 | 3.4249621 | 92.8911327 | H  | 2.4850554  | 9.6540432  | 85.0429542 |
| H | -1.0813636 | 2.1748449 | 91.9090623 | H  | 3.3899228  | 7.4428035  | 84.2920246 |
| H | -2.1572103 | 3.1745837 | 93.9081443 | O  | 0.2176945  | 6.8901783  | 89.5844049 |
| H | -3.3948037 | 2.7757696 | 92.6695907 | C  | -0.1485535 | 0.8089799  | 89.0312560 |
| H | -2.8861756 | 4.4738648 | 92.9112842 | C  | 0.6567411  | -0.2803186 | 89.3874206 |
| H | 7.5104265  | 5.8928009 | 87.4976975 | C  | 0.2005938  | -1.1362487 | 90.4587635 |
| H | 7.0968900  | 2.1662208 | 91.6927751 | C  | 0.9975815  | -2.1836657 | 91.0122677 |
| H | 6.1215633  | 0.8261519 | 84.0668205 | C  | -1.1055598 | -0.9051172 | 91.0323816 |
| C | 6.7731313  | 5.8259758 | 88.3300858 | C  | -1.5828432 | -1.7760155 | 92.0572275 |
| H | 4.0858233  | 1.8947422 | 92.7149354 | C  | -1.8630471 | 0.2319098  | 90.6271333 |
| H | 6.0083414  | 7.8590623 | 87.9717338 | H  | -2.8274409 | 0.4313479  | 91.1206038 |
| H | 4.1129285  | 2.3595435 | 83.7281074 | C  | -1.3822798 | 1.1322351  | 89.6846980 |
| C | 6.2356417  | 4.3978538 | 88.3247385 | C  | 4.2205821  | 0.5644197  | 88.2375556 |
| C | 6.4877058  | 1.2743621 | 91.4354771 | C  | 4.6706085  | -0.6657278 | 87.7771287 |
| C | 5.6313513  | 6.8156382 | 88.0163299 | H  | 5.7118480  | -0.7675826 | 87.4343909 |
| H | 4.8461648  | 6.7633209 | 88.7999011 | C  | 3.8046594  | -1.7960723 | 87.6943548 |
| C | 5.9611394  | 3.6866542 | 89.5040790 | C  | 4.2555862  | -3.0294385 | 87.1360757 |
| C | 6.3306914  | 1.3219089 | 85.0378032 | C  | 2.4385445  | -1.6905504 | 88.1527668 |
| H | 8.2934063  | 5.5044421 | 89.8906123 | C  | 1.5756524  | -2.8121842 | 87.9684823 |
| C | 5.9381160  | 3.7723820 | 87.0999296 | C  | 1.9900996  | -0.4513950 | 88.7400144 |
| C | 7.4916508  | 6.2233129 | 89.6257596 | C  | 2.8695542  | 0.6385598  | 88.7046102 |
| H | 7.9516019  | 7.2268605 | 89.5205600 | O  | 0.2397538  | 1.6220978  | 87.9816042 |
| H | 6.1702273  | 4.3092901 | 86.1654264 | O  | 2.4444425  | 1.8673513  | 89.1830591 |
| C | 4.2819325  | 2.4887952 | 91.7982652 | P  | 1.4283378  | 2.7496353  | 88.2071288 |
| H | 6.3292272  | 0.6936858 | 92.3681472 | O  | 0.8671756  | 3.8168026  | 89.1943028 |
| H | 7.0833938  | 0.6506411 | 90.7381486 | O  | 1.9601098  | 3.1905948  | 86.8795583 |
| C | 5.3665615  | 2.4118894 | 89.4849492 | C  | -0.7975626 | -2.8115190 | 92.5399149 |
| C | 4.3473699  | 2.8718622 | 84.6841871 | C  | 0.5111675  | -3.0007307 | 92.0235876 |
| C | 5.3294763  | 2.5069955 | 87.0229201 | H  | -2.5867928 | -1.5946559 | 92.4727973 |
| H | 6.8071234  | 0.5776042 | 85.7079909 | H  | -1.1768587 | -3.4717436 | 93.3347203 |
| H | 7.0744736  | 2.1263660 | 84.8557130 | H  | 2.0165277  | -2.3380325 | 90.6329344 |
| C | 5.1401602  | 1.6823212 | 90.8090303 | H  | 1.1503555  | -3.7985718 | 92.4317202 |
| C | 5.0238516  | 1.8259376 | 88.2358874 | C  | 2.0422423  | -3.9917573 | 87.4048818 |
| C | 5.0394049  | 1.8972732 | 85.6516314 | C  | 3.3973538  | -4.1099062 | 86.9977467 |
| H | 3.3093843  | 2.7593713 | 91.3442579 | H  | 0.5225438  | -2.7284012 | 88.2718980 |
| H | 3.4009557  | 3.2322086 | 85.1304021 | H  | 1.3536992  | -4.8395562 | 87.2675977 |
| H | 4.7787487  | 3.4306793 | 92.1086083 | H  | 3.7593746  | -5.0522740 | 86.5591137 |
| H | 5.1479523  | 6.5836300 | 87.0468709 | H  | 5.3024488  | -3.1006350 | 86.8009623 |
| H | 4.9891337  | 3.7437806 | 84.4375277 | C  | -1.9284134 | 3.4706991  | 90.4450695 |
| H | 6.7846318  | 6.2765043 | 90.4798811 | C  | -1.9976183 | 2.4718164  | 89.4302254 |
| H | 4.5925096  | 0.7432208 | 90.5884433 | C  | -2.3424676 | 4.7785201  | 90.1336765 |
| H | 4.3363436  | 1.0538762 | 85.8066549 | C  | -2.5127628 | 2.8042220  | 88.1475566 |
| H | 6.1992315  | 4.1393923 | 90.4773469 | C  | -2.9200424 | 4.1256008  | 87.8936080 |
| H | -0.2710576 | 8.7243475 | 88.8682839 | C  | -2.8231917 | 5.1365055  | 88.8638859 |
|   |            |           |            | H  | -2.2698106 | 5.5634312  | 90.9049524 |
|   |            |           |            | C  | -2.6710892 | 1.7564911  | 87.0484491 |
|   |            |           |            | H  | -3.3145901 | 4.3712958  | 86.8957595 |
|   |            |           |            | C  | -2.0175224 | 2.1828726  | 85.7227327 |
|   |            |           |            | H  | -2.5333169 | 3.0565057  | 85.2716111 |
|   |            |           |            | H  | -2.0697183 | 1.3566965  | 84.9841535 |
|   |            |           |            | H  | -0.9517983 | 2.4451726  | 85.8690277 |
|   |            |           |            | C  | -4.1579119 | 1.3989550  | 86.8597119 |
|   |            |           |            | H  | -2.1571087 | 0.8345994  | 87.3877819 |
|   |            |           |            | H  | -4.7433062 | 2.2802210  | 86.5223900 |
|   |            |           |            | H  | -4.6094239 | 1.0400312  | 87.8068015 |
|   |            |           |            | H  | -4.2783572 | 0.6018541  | 86.0969114 |
|   |            |           |            | C  | -3.2599224 | 6.5693296  | 88.5844982 |
|   |            |           |            | C  | -2.8261716 | 7.0735627  | 87.1985328 |
|   |            |           |            | H  | -3.0363558 | 8.1576501  | 87.0896900 |

## 12j-mi



Energy (Hartree) = -7274.21068739

|   |            |           |            |
|---|------------|-----------|------------|
| H | -3.3740158 | 6.5552962 | 86.3845129 |
| H | -1.7444635 | 6.9074589 | 87.0187735 |
| C | -4.7805103 | 6.7246557 | 88.7791531 |
| H | -2.7587789 | 7.2050704 | 89.3485884 |
| H | -5.1003605 | 7.7770712 | 88.6289976 |
| H | -5.0889464 | 6.4110071 | 89.7964672 |
| H | -5.3336157 | 6.0928505 | 88.0529986 |
| C | -1.4045529 | 3.2005186 | 91.8581658 |
| C | -0.1661777 | 4.0440100 | 92.2157265 |
| H | 0.1226898  | 3.9183122 | 93.2788770 |
| H | -0.3421211 | 5.1328461 | 92.0663994 |
| H | 0.7069534  | 3.7048296 | 91.6192919 |
| C | -2.5235174 | 3.3870998 | 92.8999997 |
| H | -1.0829186 | 2.1425161 | 91.9091736 |
| H | -2.1670154 | 3.1199836 | 93.9162726 |
| H | -3.3978972 | 2.7477777 | 92.6630285 |
| H | -2.8809419 | 4.4374645 | 92.9333212 |
| H | 7.4518892  | 5.9229522 | 87.4928760 |
| H | 7.0821454  | 2.2096070 | 91.7038232 |
| H | 6.1801367  | 0.8219832 | 84.0963350 |
| C | 6.7136294  | 5.8525030 | 88.3242408 |
| H | 4.0741553  | 1.9198980 | 92.7347015 |
| H | 5.9230577  | 7.8724079 | 87.9448064 |
| H | 4.1357950  | 2.3020368 | 83.7357011 |
| C | 6.1965373  | 4.4169056 | 88.3279386 |
| C | 6.4788986  | 1.3118704 | 91.4537424 |
| C | 5.5595697  | 6.8247949 | 88.0015306 |
| H | 4.7777498  | 6.7733734 | 88.7884764 |
| C | 5.9230331  | 3.7129138 | 89.5116045 |
| C | 6.3704286  | 1.3303654 | 85.0646124 |
| H | 8.2335753  | 5.5618874 | 89.8902560 |
| C | 5.9190693  | 3.7753257 | 87.1073615 |
| C | 7.4239725  | 6.2689499 | 89.6183384 |
| H | 7.8721250  | 7.2771418 | 89.5070440 |
| H | 6.1527930  | 4.3058379 | 86.1695095 |
| C | 4.2647291  | 2.5108159 | 91.8149896 |
| H | 6.3275872  | 0.7355261 | 92.3902277 |
| H | 7.0777874  | 0.6894596 | 90.7583556 |
| C | 5.3481913  | 2.4294521 | 89.4996276 |
| C | 4.3467276  | 2.8242927 | 84.6917642 |
| C | 5.3296732  | 2.5007529 | 87.0368357 |
| H | 6.8634615  | 0.6046853 | 85.7431124 |
| H | 7.0945832  | 2.1519293 | 84.8805555 |
| C | 5.1270387  | 1.7062864 | 90.8280388 |
| C | 5.0229282  | 1.8272254 | 88.2536131 |
| C | 5.0614566  | 1.8753234 | 85.6681107 |
| H | 3.2886714  | 2.7705499 | 91.3622415 |
| H | 3.3856742  | 3.1554024 | 85.1294186 |
| H | 4.7528676  | 3.4583079 | 92.1214802 |
| H | 5.0772853  | 6.5759014 | 87.0356469 |
| H | 4.9634836  | 3.7146665 | 84.4462265 |
| H | 6.7140562  | 6.3208086 | 90.4699376 |
| H | 4.5864057  | 0.7618221 | 90.6128923 |
| H | 4.3800847  | 1.0147946 | 85.8242734 |
| H | 6.1470780  | 4.1780330 | 90.4822584 |
| H | -0.2097148 | 8.7161880 | 88.8319848 |

## 7.7 Agglomeration to Complexes 12

### 7.7.1 Pathway 12d-ma → 14d-ma

TS-7-d-ma; woelfling data

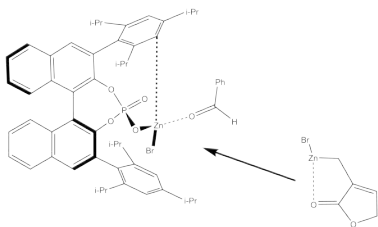

Energy (Hartree) = -11969.928995



|   |           |           |           |    |            |           |           |
|---|-----------|-----------|-----------|----|------------|-----------|-----------|
| C | 1.914707  | 2.314193  | 1.800735  | H  | -0.476303  | 6.664803  | 0.465374  |
| C | 3.316279  | 2.309259  | 1.794368  | H  | -1.614282  | 6.345047  | -0.875658 |
| C | 3.995976  | 3.584576  | 1.785391  | H  | 1.415254   | -6.036851 | -2.024880 |
| C | 5.404857  | 3.713947  | 1.594158  | H  | 5.446552   | -2.156344 | -3.867294 |
| C | 3.221141  | 4.793014  | 1.941464  | H  | 4.006580   | -4.922433 | 3.421408  |
| C | 3.889397  | 6.053224  | 1.981497  | C  | 1.717072   | -5.202135 | -2.695836 |
| C | 1.799990  | 4.716752  | 1.987848  | H  | 4.059636   | 0.715550  | -3.665014 |
| H | 1.221258  | 5.649720  | 2.072780  | H  | -0.184567  | -5.290767 | -3.807508 |
| C | 1.126242  | 3.509316  | 1.853451  | H  | 1.642518   | -3.853347 | 3.526622  |
| C | 4.365180  | -1.224489 | 0.692713  | C  | 2.482285   | -4.203317 | -1.837188 |
| C | 5.462576  | -1.454308 | 1.513090  | C  | 5.720003   | -1.448127 | -3.057033 |
| H | 6.013500  | -2.403281 | 1.421741  | C  | 0.425524   | -4.561533 | -3.234149 |
| C | 5.843198  | -0.533911 | 2.531797  | H  | 0.654439   | -3.708141 | -3.907957 |
| C | 6.906767  | -0.834828 | 3.434730  | C  | 3.119693   | -3.084129 | -2.401528 |
| C | 5.098005  | 0.691577  | 2.701272  | C  | 4.003603   | -4.790312 | 2.319430  |
| C | 5.411390  | 1.516748  | 3.823579  | H  | 3.483744   | -6.282342 | -3.429264 |
| C | 4.049635  | 1.011478  | 1.760325  | C  | 2.517740   | -4.341574 | -0.442542 |
| C | 3.700643  | 0.037761  | 0.813215  | C  | 2.568190   | -5.800245 | -3.826786 |
| O | 1.229388  | 1.113115  | 1.796188  | H  | 1.993402   | -6.563556 | -4.391370 |
| O | 2.694273  | 0.298555  | -0.093994 | H  | 2.013639   | -5.209178 | 0.013721  |
| P | 1.100641  | 0.256763  | 0.383459  | C  | 3.531108   | -0.156718 | -3.228478 |
| O | 0.478011  | 1.226970  | -0.680033 | H  | 6.268604   | -0.601398 | -3.519429 |
| O | 0.497634  | -1.085671 | 0.641811  | H  | 6.414718   | -1.976848 | -2.373295 |
| C | 5.264778  | 6.138190  | 1.830880  | C  | 3.766263   | -2.116480 | -1.613482 |
| C | 6.022784  | 4.956893  | 1.616459  | C  | 1.651226   | -3.808740 | 2.417562  |
| H | 3.282764  | 6.963126  | 2.114356  | C  | 3.143529   | -3.399657 | 0.394863  |
| H | 5.766167  | 7.117712  | 1.856567  | H  | 5.050547   | -4.625607 | 1.991508  |
| H | 6.004469  | 2.810677  | 1.417635  | H  | 3.663434   | -5.744973 | 1.865343  |
| H | 7.110240  | 5.026112  | 1.460586  | C  | 4.470917   | -0.951180 | -2.304427 |
| C | 6.438299  | 1.184717  | 4.696436  | C  | 3.779380   | -2.273303 | -0.199716 |
| C | 7.207540  | 0.008646  | 4.493265  | C  | 3.090472   | -3.621014 | 1.905984  |
| H | 4.818477  | 2.424383  | 4.000453  | H  | 2.655364   | 0.225251  | -2.667958 |
| H | 6.652010  | 1.836741  | 5.557204  | H  | 1.012455   | -2.966267 | 2.086098  |
| H | 8.024826  | -0.241110 | 5.186945  | H  | 3.162478   | -0.773430 | -4.074819 |
| H | 7.472398  | -1.767971 | 3.284408  | H  | -0.195148  | -4.173818 | -2.403000 |
| C | -0.925783 | 3.949512  | 0.453720  | H  | 1.200711   | -4.754332 | 2.048569  |
| C | -0.353510 | 3.425880  | 1.652614  | H  | 2.886034   | -5.022813 | -4.552379 |
| C | -2.299557 | 3.755044  | 0.223582  | H  | 4.821851   | -0.254412 | -1.516473 |
| C | -1.180748 | 2.760404  | 2.595825  | H  | 3.482208   | -2.707379 | 2.394405  |
| C | -2.555790 | 2.620369  | 2.326885  | H  | 3.110802   | -2.954375 | -3.495877 |
| C | -3.139166 | 3.099120  | 1.143993  | C  | -11.354491 | -1.698120 | -2.619440 |
| H | -2.743053 | 4.147882  | -0.707281 | C  | -10.103244 | -1.177470 | -2.672486 |
| C | -0.638109 | 2.236955  | 3.923892  | C  | -9.894932  | -0.663842 | -4.067049 |
| H | -3.183534 | 2.114826  | 3.075071  | O  | -11.052059 | -0.877434 | -4.783695 |
| C | -0.949946 | 0.745844  | 4.140176  | C  | -12.017316 | -1.520384 | -3.951962 |
| H | -2.040017 | 0.567006  | 4.253304  | O  | -8.909888  | -0.142038 | -4.540219 |
| H | -0.460158 | 0.379436  | 5.065897  | C  | -9.013937  | -1.071643 | -1.672720 |
| H | -0.583448 | 0.135757  | 3.292124  | H  | -9.399818  | -0.918751 | -0.644340 |
| C | -1.148883 | 3.099840  | 5.093769  | H  | -11.844661 | -2.177497 | -1.759786 |
| H | 0.464870  | 2.343380  | 3.903166  | H  | -12.317807 | -2.484918 | -4.423073 |
| H | -2.253962 | 3.041978  | 5.186001  | H  | -12.932129 | -0.886249 | -3.895375 |
| H | -0.880276 | 4.166801  | 4.955103  | Zn | -7.993509  | -2.739657 | -1.642005 |
| H | -0.713047 | 2.757118  | 6.055245  | H  | -8.331368  | -0.238892 | -1.938689 |
| C | -4.634884 | 2.994134  | 0.855179  | Br | -7.097361  | -4.808636 | -1.483660 |
| C | -5.365534 | 1.939637  | 1.696127  | Zn | -0.664150  | 0.888263  | -2.108221 |
| H | -6.418437 | 1.838790  | 1.362395  | Br | -1.053858  | 1.404487  | -4.311058 |
| H | -5.392918 | 2.223787  | 2.769107  | C  | -3.454487  | -4.705286 | -1.200501 |
| H | -4.882430 | 0.944207  | 1.624150  | C  | -2.885255  | -3.434010 | -1.280846 |
| C | -5.308353 | 4.373196  | 1.011002  | C  | -2.620921  | -2.873791 | -2.555431 |
| H | -4.731008 | 2.698249  | -0.214879 | C  | -2.920108  | -3.595792 | -3.734667 |
| H | -6.384656 | 4.325994  | 0.743863  | C  | -3.492171  | -4.867989 | -3.644458 |
| H | -4.828444 | 5.136162  | 0.366415  | C  | -3.758750  | -5.417789 | -2.378916 |
| H | -5.229513 | 4.726676  | 2.060420  | H  | -3.676252  | -5.151964 | -0.220352 |
| C | -0.122684 | 4.752825  | -0.572556 | H  | -2.613680  | -2.857059 | -0.383475 |
| C | -0.190102 | 4.177828  | -1.994278 | C  | -1.999910  | -1.569797 | -2.688891 |
| H | 0.314348  | 4.849222  | -2.718877 | H  | -2.689546  | -3.149056 | -4.714970 |
| H | -1.228827 | 4.034334  | -2.356843 | H  | -3.730936  | -5.434198 | -4.556671 |
| H | 0.340134  | 3.207751  | -2.041797 | H  | -4.217543  | -6.415318 | -2.306936 |
| C | -0.558514 | 6.230685  | -0.551772 | O  | -1.734512  | -0.826643 | -1.722379 |
| H | 0.942504  | 4.718564  | -0.273512 | H  | -1.752011  | -1.227529 | -3.727184 |
| H | 0.071478  | 6.834798  | -1.237086 |    |            |           |           |

agg-7-d-ma

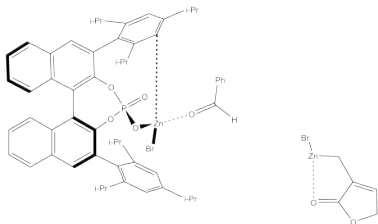

Energy (Hartree)=-11969.96497

|   |           |           |           |
|---|-----------|-----------|-----------|
| C | 2.952877  | 2.568828  | 2.244162  |
| C | 4.353657  | 2.568828  | 2.244162  |
| C | 5.026472  | 3.847942  | 2.244162  |
| C | 6.436497  | 3.983063  | 2.062582  |
| C | 4.247343  | 5.054653  | 2.401759  |
| C | 4.913040  | 6.315787  | 2.460953  |
| C | 2.823206  | 4.978905  | 2.409154  |
| H | 2.242302  | 5.913060  | 2.465398  |
| C | 2.164856  | 3.766275  | 2.258777  |
| C | 5.356295  | -0.975926 | 1.139926  |
| C | 6.464717  | -1.211688 | 1.942927  |
| H | 7.004781  | -2.165789 | 1.846944  |
| C | 6.872995  | -0.290161 | 2.949400  |
| C | 7.950637  | -0.597118 | 3.832454  |
| C | 6.140849  | 0.941493  | 3.129007  |
| C | 6.476561  | 1.762683  | 4.247387  |
| C | 5.082736  | 1.269111  | 2.201346  |
| C | 4.710406  | 0.298046  | 1.258462  |
| O | 2.265569  | 1.378571  | 2.267449  |
| O | 3.695956  | 0.570413  | 0.361046  |
| P | 2.118840  | 0.458489  | 0.877867  |
| O | 1.396471  | 1.295259  | -0.214949 |
| O | 1.648258  | -0.900450 | 1.295692  |
| C | 6.290034  | 6.403365  | 2.324023  |
| C | 7.052007  | 5.226595  | 2.101966  |
| H | 4.305416  | 7.223983  | 2.595836  |
| H | 6.789815  | 7.384042  | 2.364758  |
| H | 7.038167  | 3.082990  | 1.880545  |
| H | 8.139704  | 5.298884  | 1.954288  |
| C | 7.517487  | 1.424164  | 5.102283  |
| C | 8.277028  | 0.244791  | 4.884008  |
| H | 5.891861  | 2.672435  | 4.437749  |
| H | 7.749475  | 2.074107  | 5.959639  |
| H | 9.106646  | -0.008625 | 5.562134  |
| H | 8.507350  | -1.534352 | 3.672595  |
| C | 0.258583  | 4.071270  | 0.653053  |
| C | 0.712997  | 3.628698  | 1.928408  |
| C | -1.052175 | 3.717832  | 0.238948  |
| C | -0.167421 | 2.901456  | 2.779203  |
| C | -1.465532 | 2.588822  | 2.334160  |
| C | -1.938811 | 2.977538  | 1.070147  |
| H | -1.436830 | 4.115013  | -0.715531 |
| C | 0.245020  | 2.483748  | 4.186398  |
| H | -2.127120 | 2.018939  | 3.001207  |
| C | -0.027956 | 0.997070  | 4.472334  |
| H | -1.115175 | 0.776841  | 4.513455  |
| H | 0.397959  | 0.715397  | 5.456452  |
| H | 0.431735  | 0.351099  | 3.700422  |
| C | -0.434134 | 3.400406  | 5.223193  |
| H | 1.338916  | 2.645216  | 4.273850  |
| H | -1.539175 | 3.298893  | 5.188087  |
| H | -0.187238 | 4.466469  | 5.044741  |
| H | -0.104029 | 3.137539  | 6.249580  |
| C | -3.361606 | 2.712121  | 0.594586  |
| C | -4.030607 | 1.513494  | 1.276723  |
| H | -4.999206 | 1.287037  | 0.788063  |
| H | -4.246852 | 1.714025  | 2.346526  |
| H | -3.395503 | 0.607358  | 1.222280  |
| C | -4.213578 | 3.988598  | 0.749647  |

|    |            |           |           |
|----|------------|-----------|-----------|
| H  | -3.288546  | 2.490484  | -0.495129 |
| H  | -5.232994  | 3.829018  | 0.345195  |
| H  | -3.764169  | 4.847765  | 0.213726  |
| H  | -4.308450  | 4.269445  | 1.819552  |
| C  | 1.113851   | 4.910536  | -0.294131 |
| C  | 1.271934   | 4.288148  | -1.690955 |
| H  | 1.928871   | 4.925454  | -2.317489 |
| H  | 0.306314   | 4.184062  | -2.229105 |
| H  | 1.739924   | 3.285549  | -1.621840 |
| C  | 0.559910   | 6.346701  | -0.368891 |
| H  | 2.129150   | 4.971053  | 0.141279  |
| H  | 1.217402   | 6.983282  | -0.995832 |
| H  | 0.489902   | 6.811029  | 0.636280  |
| H  | -0.455014  | 6.367661  | -0.818834 |
| H  | 2.076880   | -5.616250 | -1.485259 |
| H  | 6.350590   | -1.958986 | -3.416771 |
| H  | 5.092245   | -4.640786 | 3.866381  |
| C  | 2.495189   | -4.856215 | -2.181611 |
| H  | 5.044616   | 0.965607  | -3.190001 |
| H  | 0.666173   | -4.855307 | -3.400423 |
| H  | 2.728056   | -3.647836 | 4.075313  |
| C  | 3.316132   | -3.891321 | -1.336195 |
| C  | 6.653078   | -1.255710 | -2.612464 |
| C  | 1.307103   | -4.137292 | -2.846573 |
| H  | 1.655185   | -3.370778 | -3.569099 |
| C  | 3.989455   | -2.801723 | -1.916359 |
| C  | 5.051466   | -4.502423 | 2.765897  |
| H  | 4.194818   | -6.138646 | -2.733347 |
| C  | 3.395848   | -4.041596 | 0.057183  |
| C  | 3.358275   | -5.596427 | -3.218443 |
| H  | 2.752199   | -6.332122 | -3.786633 |
| H  | 2.875817   | -4.894529 | 0.522615  |
| C  | 4.500386   | 0.096604  | -2.765741 |
| H  | 7.217236   | -0.425327 | -3.085655 |
| H  | 7.343207   | -1.799371 | -1.936189 |
| C  | 4.695357   | -1.863566 | -1.145638 |
| C  | 2.684600   | -3.603705 | 2.967204  |
| C  | 4.083989   | -3.129778 | 0.877670  |
| H  | 6.082335   | -4.305692 | 2.407409  |
| H  | 4.723681   | -5.463090 | 2.314675  |
| C  | 5.426169   | -0.721465 | -1.849135 |
| C  | 4.737006   | -2.022069 | 0.267034  |
| C  | 4.089123   | -3.359949 | 2.390443  |
| H  | 3.625098   | 0.478569  | -2.204947 |
| H  | 2.003402   | -2.782775 | 2.671042  |
| H  | 4.129050   | -0.506849 | -3.620715 |
| H  | 0.677295   | -3.625261 | -2.092267 |
| H  | 2.258158   | -4.570591 | 2.623539  |
| H  | 3.798351   | -4.889568 | -3.952471 |
| H  | 5.806505   | -0.034005 | -1.067772 |
| H  | 4.466500   | -2.434305 | 2.868496  |
| H  | 3.953104   | -2.666949 | -3.009325 |
| C  | -21.155475 | -3.913619 | -7.253424 |
| C  | -19.946960 | -3.323465 | -7.425118 |
| C  | -19.849094 | -3.005177 | -8.876018 |
| O  | -20.985779 | -3.345310 | -9.518802 |
| C  | -21.877598 | -3.954139 | -8.567916 |
| O  | -18.864254 | -2.534760 | -9.448538 |
| C  | -18.783977 | -2.982205 | -6.561835 |
| H  | -18.596043 | -3.743825 | -5.780918 |
| H  | -21.585224 | -4.305734 | -6.319623 |
| H  | -22.103641 | -4.984651 | -8.920594 |
| H  | -22.834242 | -3.387075 | -8.558432 |
| Zn | -17.269808 | -2.620141 | -7.816612 |
| H  | -18.972890 | -2.020330 | -6.030745 |
| Br | -15.171178 | -2.227274 | -8.600166 |
| Zn | -0.435661  | 1.638563  | -0.699798 |
| Br | -1.501415  | 1.800588  | -2.789473 |
| C  | -0.468591  | -4.330410 | 0.727781  |
| C  | -0.608276  | -2.952636 | 0.537959  |
| C  | -1.513700  | -2.479615 | -0.445750 |

|   |           |           |           |
|---|-----------|-----------|-----------|
| C | -2.256649 | -3.389115 | -1.236969 |
| C | -2.117515 | -4.765057 | -1.029054 |
| C | -1.224409 | -5.232226 | -0.045539 |
| H | 0.248536  | -4.704579 | 1.472790  |
| H | 0.014855  | -2.221679 | 1.081336  |
| C | -1.634463 | -1.050363 | -0.696636 |
| H | -2.937525 | -3.005306 | -2.013629 |
| H | -2.692968 | -5.478775 | -1.636450 |
| H | -1.105395 | -6.316182 | 0.108230  |
| O | -1.135602 | -0.183945 | 0.045135  |
| H | -2.178352 | -0.729095 | -1.624683 |

|   |           |           |           |
|---|-----------|-----------|-----------|
| H | -3.399432 | -6.577989 | 3.477488  |
| H | -4.842369 | -7.879428 | 1.902606  |
| H | -4.669244 | -4.634073 | -0.965911 |
| H | -5.427063 | -6.906622 | -0.344564 |
| C | -7.417148 | -2.254338 | -0.477586 |
| C | -7.748529 | -1.745869 | -1.761255 |
| H | -5.847657 | -2.787581 | 0.901559  |
| H | -8.217937 | -2.528936 | 0.226099  |
| H | -8.803998 | -1.642448 | -2.055995 |
| H | -6.983288 | -0.933763 | -3.616474 |
| C | 0.665459  | -2.978228 | 3.285209  |
| C | -0.603281 | -2.329830 | 3.377330  |
| C | 1.755957  | -2.427132 | 3.985480  |
| C | -0.729153 | -1.126919 | 4.123017  |
| C | 0.391083  | -0.631391 | 4.822912  |
| C | 1.640880  | -1.274914 | 4.787192  |
| H | 2.734716  | -2.928277 | 3.930864  |
| C | -2.055707 | -0.378283 | 4.227009  |
| H | 0.265789  | 0.274965  | 5.436932  |
| C | -1.937298 | 1.070018  | 3.719130  |
| H | -1.248028 | 1.673325  | 4.347943  |
| H | -2.926407 | 1.571857  | 3.744792  |
| H | -1.575036 | 1.096856  | 2.672410  |
| C | -2.619069 | -0.440612 | 5.658731  |
| H | -2.782822 | -0.895800 | 3.570443  |
| H | -1.952445 | 0.071634  | 6.384060  |
| H | -2.739737 | -1.489705 | 5.996855  |
| H | -3.611643 | 0.052698  | 5.710642  |
| C | 2.815760  | -0.858347 | 5.666915  |
| C | 3.053904  | 0.654998  | 5.754414  |
| H | 3.903251  | 0.876079  | 6.431776  |
| H | 2.169655  | 1.193350  | 6.157351  |
| H | 3.310985  | 1.078658  | 4.763271  |
| C | 2.643366  | -1.469145 | 7.072556  |
| H | 3.724999  | -1.304788 | 5.208897  |
| H | 3.520596  | -1.244404 | 7.714242  |
| H | 2.525502  | -2.569820 | 7.020774  |
| H | 1.739957  | -1.059947 | 7.572004  |
| C | 0.879681  | -4.273386 | 2.497887  |
| C | 2.074019  | -4.211846 | 1.531003  |
| H | 2.179425  | -5.178181 | 0.996964  |
| H | 3.035341  | -4.011044 | 2.046182  |
| H | 1.920254  | -3.429487 | 0.762670  |
| C | 1.018422  | -5.470424 | 3.459330  |
| H | -0.023204 | -4.442252 | 1.879001  |
| H | 1.112916  | -6.418896 | 2.891421  |
| H | 0.142938  | -5.562165 | 4.132738  |
| H | 1.920354  | -5.367304 | 4.098484  |
| H | 1.245327  | -2.940158 | -5.098055 |
| H | -0.172734 | -2.776975 | -6.117940 |
| H | -4.720969 | 3.232978  | -3.710309 |
| C | 1.414982  | 1.861886  | -5.313914 |
| H | 0.505135  | -4.186300 | -3.308360 |
| H | 3.586350  | 2.104429  | -5.118875 |
| H | -3.430181 | 3.549464  | -1.497687 |
| C | 0.255895  | 1.103013  | -4.680468 |
| C | -0.977650 | -3.102703 | -5.426154 |
| C | 2.772000  | 1.477832  | -4.699620 |
| H | 3.029735  | 0.419048  | -4.910773 |
| C | 0.242425  | -0.301675 | -4.615500 |
| C | -3.860154 | 2.659805  | -4.113876 |
| H | 0.454116  | 2.014073  | -7.284859 |
| C | -0.845232 | 1.790524  | -4.151244 |
| C | 1.417686  | 1.688358  | -6.843847 |
| H | 2.230157  | 2.281875  | -7.312909 |
| H | -0.846069 | 2.892117  | -4.192966 |
| C | 0.541885  | -3.079663 | -3.383466 |
| H | -0.985094 | -4.212706 | -5.413541 |
| H | -1.942196 | -2.756370 | -5.849692 |
| C | -0.812265 | -1.013205 | -4.019780 |
| C | -2.570180 | 3.004948  | -1.940699 |

## 7.7.2 Pathway 12d-mi → 14d-mi

### TS-7-d-mi; woelfling data

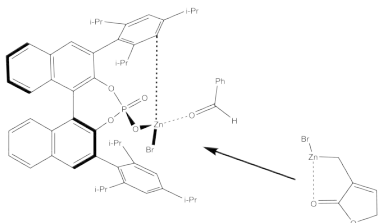

Energy (Hartree) = -11969.942882

|    |           |           |           |
|----|-----------|-----------|-----------|
| Zn | 2.089726  | -0.747437 | 1.237619  |
| Br | 4.292899  | -0.938841 | 1.830538  |
| C  | 0.470826  | 5.385330  | 1.773616  |
| C  | 0.770056  | 4.038681  | 1.545764  |
| C  | 1.252753  | 3.250323  | 2.618443  |
| C  | 1.421305  | 3.812646  | 3.905616  |
| C  | 1.126859  | 5.161693  | 4.122182  |
| C  | 0.651942  | 5.944481  | 3.055073  |
| H  | 0.091505  | 6.012210  | 0.952930  |
| H  | 0.625642  | 3.567326  | 0.561079  |
| C  | 1.591366  | 1.845854  | 2.447380  |
| H  | 1.796089  | 3.178233  | 4.723930  |
| H  | 1.266157  | 5.604326  | 5.119696  |
| H  | 0.416349  | 7.006386  | 3.225716  |
| O  | 1.603505  | 1.257423  | 1.352347  |
| C  | -2.265208 | -2.301141 | 1.463586  |
| C  | -3.186910 | -2.910536 | 0.600331  |
| C  | -3.624156 | -4.251631 | 0.913589  |
| C  | -4.407763 | -5.042735 | 0.019444  |
| C  | -3.228004 | -4.843888 | 2.169512  |
| C  | -3.699974 | -6.147432 | 2.509065  |
| C  | -2.311338 | -4.153147 | 3.012195  |
| H  | -1.977339 | -4.638357 | 3.942229  |
| C  | -1.765161 | -2.928783 | 2.647525  |
| C  | -2.996539 | -0.997501 | -2.726146 |
| C  | -4.331657 | -0.985128 | -3.112638 |
| H  | -4.608110 | -0.532620 | -4.077729 |
| C  | -5.365168 | -1.474984 | -2.262335 |
| C  | -6.739397 | -1.358965 | -2.630031 |
| C  | -5.025633 | -2.045818 | -0.980161 |
| C  | -6.090132 | -2.401566 | -0.098213 |
| C  | -3.633675 | -2.198094 | -0.629210 |
| C  | -2.677523 | -1.637075 | -1.486231 |
| O  | -1.830535 | -1.016985 | 1.214072  |
| O  | -1.337745 | -1.731753 | -1.158975 |
| P  | -0.731610 | -0.713160 | -0.002292 |
| O  | 0.601559  | -1.468146 | 0.341023  |
| O  | -0.739861 | 0.754061  | -0.284469 |
| C  | -4.493153 | -6.871191 | 1.632279  |
| C  | -4.830430 | -6.317733 | 0.368860  |

|    |           |           |           |
|----|-----------|-----------|-----------|
| C  | -1.932128 | 1.131381  | -3.547276 |
| H  | -4.250991 | 1.915512  | -4.838083 |
| H  | -3.221353 | 3.367361  | -4.683402 |
| C  | -0.756786 | -2.540476 | -4.009375 |
| C  | -1.912573 | -0.290781 | -3.475681 |
| C  | -3.067445 | 1.983367  | -2.979487 |
| H  | 0.691396  | -2.671095 | -2.365381 |
| H  | -2.012764 | 2.489036  | -1.134466 |
| H  | 1.431496  | -2.822783 | -3.995990 |
| H  | 2.768353  | 1.609894  | -3.599053 |
| H  | -1.899546 | 3.763568  | -2.396790 |
| H  | 1.571272  | 0.624632  | -7.122356 |
| H  | -1.596748 | -2.906234 | -3.385355 |
| H  | -3.765038 | 1.308224  | -2.446333 |
| H  | 1.090295  | -0.866845 | -5.034309 |
| H  | 1.858266  | 1.289583  | 3.377168  |
| C  | 9.495689  | 7.861025  | -3.180683 |
| C  | 8.401120  | 7.121922  | -3.487837 |
| C  | 8.651658  | 5.742527  | -2.977295 |
| O  | 9.923224  | 5.666802  | -2.481913 |
| C  | 10.517788 | 6.971234  | -2.537471 |
| O  | 7.852847  | 4.820868  | -2.939525 |
| C  | 7.103950  | 7.403822  | -4.133329 |
| H  | 7.011431  | 6.803641  | -5.066096 |
| H  | 9.652966  | 8.932430  | -3.367371 |
| H  | 11.467366 | 6.920654  | -3.117745 |
| H  | 10.783808 | 7.276054  | -1.499376 |
| Zn | 5.675985  | 6.661097  | -2.996079 |
| H  | 6.960267  | 8.472040  | -4.381564 |
| Br | 3.792193  | 6.280983  | -1.790036 |

|   |           |           |           |
|---|-----------|-----------|-----------|
| C | -5.932983 | -2.531294 | -3.019733 |
| C | -7.231880 | -2.485875 | -3.608408 |
| C | -5.750431 | -3.222148 | -1.764260 |
| C | -6.906151 | -3.757215 | -1.119613 |
| C | -4.423911 | -3.306517 | -1.198949 |
| C | -3.395759 | -2.586687 | -1.825038 |
| O | -3.068530 | -2.123227 | 0.965396  |
| O | -2.111278 | -2.640260 | -1.308381 |
| P | -1.757068 | -1.714449 | 0.019088  |
| O | -0.474018 | -2.391776 | 0.566727  |
| O | -1.802781 | -0.222926 | -0.184177 |
| C | -5.246746 | -8.175936 | 0.657817  |
| C | -5.413920 | -7.576241 | -0.618308 |
| H | -4.507462 | -7.910773 | 2.675344  |
| H | -5.550091 | -9.222175 | 0.818278  |
| H | -5.174087 | -5.807952 | -1.827122 |
| H | -5.831633 | -8.165574 | -1.448133 |
| C | -8.160889 | -3.677210 | -1.709629 |
| C | -8.326550 | -3.053959 | -2.974187 |
| H | -6.798626 | -4.232468 | -0.135850 |
| H | -9.034586 | -4.094573 | -1.186633 |
| H | -9.323717 | -3.004146 | -3.437512 |
| H | -7.351050 | -1.966863 | -4.573341 |
| C | -0.768941 | -3.922683 | 3.259209  |
| C | -2.103043 | -3.420753 | 3.207743  |
| C | 0.216258  | -3.158021 | 3.938141  |
| C | -2.426808 | -2.203230 | 3.870209  |
| C | -1.423111 | -1.500739 | 4.564487  |
| C | -0.092151 | -1.945180 | 4.611157  |
| H | 1.237916  | -3.562512 | 4.030438  |
| C | -3.842943 | -1.639037 | 3.867187  |
| H | -1.688848 | -0.561399 | 5.068255  |
| C | -3.889673 | -0.174334 | 3.395026  |
| H | -3.392222 | 0.506729  | 4.117277  |
| H | -4.941965 | 0.163045  | 3.299810  |
| H | -3.400474 | -0.056520 | 2.408600  |
| C | -4.488811 | -1.812969 | 5.255394  |
| H | -4.439764 | -2.238258 | 3.151284  |
| H | -3.937918 | -1.241617 | 6.032410  |
| H | -4.499842 | -2.877587 | 5.565468  |
| H | -5.536199 | -1.446612 | 5.247226  |
| C | 1.001250  | -1.227873 | 5.390261  |
| C | 0.794331  | 0.288868  | 5.499819  |
| H | 1.680838  | 0.761426  | 5.967756  |
| H | -0.081226 | 0.542320  | 6.133804  |
| H | 0.644456  | 0.743495  | 4.501527  |
| C | 1.163213  | -1.877016 | 6.779513  |
| H | 1.944757  | -1.397447 | 4.823126  |
| H | 2.004159  | -1.412086 | 7.332650  |
| H | 1.364055  | -2.964043 | 6.701141  |
| H | 0.241304  | -1.747418 | 7.384771  |
| C | -0.353142 | -5.254426 | 2.638267  |
| C | 0.888779  | -5.161093 | 1.736036  |
| H | 1.127548  | -6.162272 | 1.323508  |
| H | 1.791956  | -4.803495 | 2.272678  |
| H | 0.704146  | -4.480269 | 0.882731  |
| C | -0.161433 | -6.302611 | 3.753228  |
| H | -1.187471 | -5.598032 | 1.997396  |
| H | 0.065949  | -7.296253 | 3.316730  |
| H | -1.067375 | -6.403416 | 4.384095  |
| H | 0.681370  | -6.027654 | 4.422391  |
| H | 0.451423  | 2.850011  | -4.151109 |
| H | -0.188526 | -2.679701 | -6.238799 |
| H | -5.712583 | 2.193143  | -3.424727 |
| C | 0.795254  | 1.824262  | -4.416180 |
| H | 0.232840  | -4.551617 | -3.669733 |
| H | 2.846033  | 2.248549  | -3.748575 |
| H | -4.627061 | 2.460233  | -1.110195 |
| C | -0.358001 | 0.878950  | -4.101134 |
| C | -1.048526 | -3.181779 | -5.749443 |
| C | 2.036402  | 1.513546  | -3.560333 |

### agg-7-d-mi

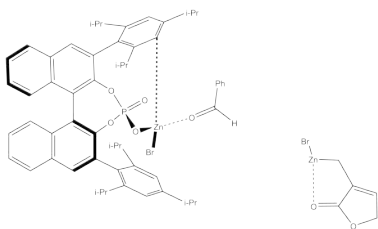

Energy (Hartree)= -11969.970164

|    |           |           |           |
|----|-----------|-----------|-----------|
| Zn | 0.707950  | -1.845365 | 2.026283  |
| Br | 3.034805  | -1.845365 | 2.026283  |
| C  | -1.693363 | 4.020215  | 2.026283  |
| C  | -1.166623 | 2.729891  | 2.128481  |
| C  | -0.492063 | 2.159700  | 1.025648  |
| C  | -0.361013 | 2.885771  | -0.177267 |
| C  | -0.882923 | 4.181185  | -0.272483 |
| C  | -1.547641 | 4.746971  | 0.829045  |
| H  | -2.223830 | 4.468749  | 2.879539  |
| H  | -1.270578 | 2.136563  | 3.049168  |
| C  | 0.060932  | 0.807980  | 1.099453  |
| H  | 0.128475  | 2.413586  | -1.043652 |
| H  | -0.784211 | 4.747413  | -1.210172 |
| H  | -1.965414 | 5.762745  | 0.752391  |
| O  | 0.049068  | 0.124618  | 2.145961  |
| C  | -3.432680 | -3.447540 | 1.085088  |
| C  | -4.129847 | -4.075235 | 0.044032  |
| C  | -4.495976 | -5.461152 | 0.218886  |
| C  | -5.047718 | -6.254898 | -0.832063 |
| C  | -4.267284 | -6.093802 | 1.497107  |
| C  | -4.675863 | -7.447600 | 1.690082  |
| C  | -3.568916 | -5.387577 | 2.519604  |
| H  | -3.351272 | -5.903277 | 3.467423  |
| C  | -3.087891 | -4.101858 | 2.312114  |
| C  | -3.585089 | -1.800836 | -3.007167 |
| C  | -4.834610 | -1.847717 | -3.613687 |
| H  | -5.000583 | -1.286819 | -4.545849 |

|    |           |           |           |   |           |           |           |
|----|-----------|-----------|-----------|---|-----------|-----------|-----------|
| H  | 2.440358  | 0.505830  | -3.786050 | C | -1.854908 | 1.911343  | 2.426595  |
| C  | -0.233965 | -0.508655 | -4.291047 | C | -3.115609 | 2.254699  | 2.900548  |
| C  | -4.760597 | 1.785064  | -3.823693 | H | -3.345509 | 2.108601  | 3.967029  |
| H  | 0.253413  | 2.082428  | -6.531502 | C | -4.138846 | 2.739163  | 2.037400  |
| C  | -1.573810 | 1.365917  | -3.600530 | C | -5.461047 | 2.978208  | 2.518318  |
| C  | 1.138817  | 1.824929  | -5.916349 | C | -3.846248 | 2.953394  | 0.640671  |
| H  | 1.942091  | 2.557670  | -6.141081 | C | -4.917884 | 3.339381  | -0.220280 |
| H  | -1.684441 | 2.452124  | -3.446619 | C | -2.504144 | 2.726325  | 0.162938  |
| C  | 0.167323  | -3.453192 | -3.527152 | C | -1.574520 | 2.154731  | 1.045121  |
| H  | -0.957484 | -4.270733 | -5.942221 | O | -1.300539 | 0.802056  | -1.486503 |
| H  | -1.972165 | -2.819916 | -6.245957 | O | -0.302412 | 1.847515  | 0.595467  |
| C  | -1.273828 | -1.400630 | -3.977466 | P | -0.123710 | 0.484985  | -0.350387 |
| C  | -3.666079 | 2.135284  | -1.561098 | O | 1.262734  | 0.781395  | -1.015850 |
| C  | -2.647038 | 0.518894  | -3.263560 | O | -0.413411 | -0.826347 | 0.303846  |
| H  | -5.007478 | 1.060158  | -4.626014 | C | -2.611590 | 6.920115  | -3.027063 |
| H  | -4.203918 | 2.621654  | -4.295843 | C | -2.928206 | 6.725659  | -1.656809 |
| C  | -1.077644 | -2.892854 | -4.236250 | H | -1.806252 | 6.015144  | -4.821553 |
| C  | -2.492442 | -0.883607 | -3.457736 | H | -2.764762 | 7.905282  | -3.493568 |
| C  | -3.928041 | 1.136488  | -2.701100 | H | -2.994518 | 5.353760  | 0.004026  |
| H  | 0.130570  | -3.249397 | -2.440135 | H | -3.312047 | 7.567038  | -1.059727 |
| H  | -3.044496 | 1.668990  | -0.774054 | C | -6.198225 | 3.543292  | 0.275046  |
| H  | 1.103331  | -3.013876 | -3.931669 | C | -6.473074 | 3.376466  | 1.658436  |
| H  | 1.799337  | 1.535226  | -2.476516 | H | -4.721306 | 3.460827  | -1.294569 |
| H  | -3.150457 | 3.051225  | -1.917337 | H | -7.008729 | 3.828869  | -0.412933 |
| H  | 1.495096  | 0.827353  | -6.245516 | H | -7.491301 | 3.545463  | 2.040903  |
| H  | -1.959503 | -3.423518 | -3.822927 | H | -5.666143 | 2.818317  | 3.588691  |
| H  | -4.531872 | 0.314765  | -2.267752 | C | 1.295395  | 1.446384  | -4.010911 |
| H  | 0.707861  | -0.916616 | -4.691950 | C | -0.113156 | 1.256344  | -3.948988 |
| H  | 0.583095  | 0.437225  | 0.186067  | C | 2.101430  | 0.360091  | -4.414645 |
| C  | 19.287639 | 15.613770 | 0.330938  | C | -0.686291 | 0.016091  | -4.338909 |
| C  | 18.360995 | 14.775376 | -0.199116 | C | 0.158881  | -1.034223 | -4.736524 |
| C  | 18.979143 | 13.421603 | -0.186358 | C | 1.557417  | -0.893699 | -4.768703 |
| O  | 20.201907 | 13.458198 | 0.384875  | H | 3.190464  | 0.497875  | -4.497592 |
| C  | 20.496188 | 14.823480 | 0.731769  | C | -2.199110 | -0.176317 | -4.382873 |
| O  | 18.488668 | 12.396641 | -0.662558 | H | -0.292232 | -1.991766 | -5.040853 |
| C  | 16.993262 | 14.905807 | -0.769502 | C | -2.664993 | -1.405093 | -3.589295 |
| H  | 16.861562 | 15.843670 | -1.344282 | H | -2.288950 | -2.352982 | -4.029478 |
| H  | 19.204301 | 16.699976 | 0.473845  | H | -3.772568 | -1.467411 | -3.581072 |
| H  | 21.423264 | 15.122043 | 0.192585  | H | -2.321463 | -1.353299 | -2.539065 |
| H  | 20.712414 | 14.876756 | 1.822846  | C | -2.689087 | -0.211239 | -5.843596 |
| Zn | 16.663758 | 13.207232 | -1.771774 | H | -2.660455 | 0.714336  | -3.909226 |
| H  | 16.239487 | 14.924948 | 0.049321  | H | -2.268252 | -1.081989 | -6.389313 |
| Br | 15.704241 | 11.672922 | -3.149588 | H | -2.389270 | 0.704534  | -6.392758 |

### 7.7.3 Pathway 12j-ma → 14j-ma

#### TS-7-j-ma-woelfling data

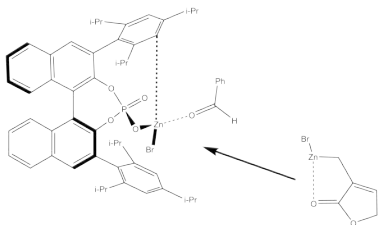

Energy (Hartree) = -11969.952429

|    |           |           |           |
|----|-----------|-----------|-----------|
| Zn | 2.628680  | -0.379542 | -1.601904 |
| Br | 4.776232  | -0.851088 | -2.321322 |
| C  | -1.447338 | 2.076358  | -1.996519 |
| C  | -2.084842 | 3.055562  | -1.226976 |
| C  | -2.254020 | 4.370714  | -1.800302 |
| C  | -2.752564 | 5.484860  | -1.059399 |
| C  | -1.875550 | 4.588550  | -3.177204 |
| C  | -2.086865 | 5.870908  | -3.766068 |
| C  | -1.241134 | 3.541849  | -3.906897 |
| H  | -0.916876 | 3.736422  | -4.940854 |
| C  | -0.966686 | 2.312222  | -3.325249 |

|   |           |           |           |
|---|-----------|-----------|-----------|
| C | -1.854908 | 1.911343  | 2.426595  |
| C | -3.115609 | 2.254699  | 2.900548  |
| H | -3.345509 | 2.108601  | 3.967029  |
| C | -4.138846 | 2.739163  | 2.037400  |
| C | -5.461047 | 2.978208  | 2.518318  |
| C | -3.846248 | 2.953394  | 0.640671  |
| C | -4.917884 | 3.339381  | -0.220280 |
| C | -2.504144 | 2.726325  | 0.162938  |
| C | -1.574520 | 2.154731  | 1.045121  |
| O | -1.300539 | 0.802056  | -1.486503 |
| O | -0.302412 | 1.847515  | 0.595467  |
| P | -0.123710 | 0.484985  | -0.350387 |
| O | 1.262734  | 0.781395  | -1.015850 |
| O | -0.413411 | -0.826347 | 0.303846  |
| C | -2.611590 | 6.920115  | -3.027063 |
| C | -2.928206 | 6.725659  | -1.656809 |
| H | -1.806252 | 6.015144  | -4.821553 |
| H | -2.764762 | 7.905282  | -3.493568 |
| H | -2.994518 | 5.353760  | 0.004026  |
| H | -3.312047 | 7.567038  | -1.059727 |
| C | -6.198225 | 3.543292  | 0.275046  |
| C | -6.473074 | 3.376466  | 1.658436  |
| H | -4.721306 | 3.460827  | -1.294569 |
| H | -7.008729 | 3.828869  | -0.412933 |
| H | -7.491301 | 3.545463  | 2.040903  |
| H | -5.666143 | 2.818317  | 3.588691  |
| C | 1.295395  | 1.446384  | -4.010911 |
| C | -0.113156 | 1.256344  | -3.948988 |
| C | 2.101430  | 0.360091  | -4.414645 |
| C | -0.686291 | 0.016091  | -4.338909 |
| C | 0.158881  | -1.034223 | -4.736524 |
| C | 1.557417  | -0.893699 | -4.768703 |
| H | 3.190464  | 0.497875  | -4.497592 |
| C | -2.199110 | -0.176317 | -4.382873 |
| H | -0.292232 | -1.991766 | -5.040853 |
| C | -2.664993 | -1.405093 | -3.589295 |
| H | -2.288950 | -2.352982 | -4.029478 |
| H | -3.772568 | -1.467411 | -3.581072 |
| H | -2.321463 | -1.353299 | -2.539065 |
| C | -2.689087 | -0.211239 | -5.843596 |
| H | -2.660455 | 0.714336  | -3.909226 |
| H | -2.268252 | -1.081989 | -6.389313 |
| H | -2.389270 | 0.704534  | -6.392758 |
| H | -3.795335 | -0.290217 | -5.884445 |
| C | 2.459556  | -2.017338 | -5.261531 |
| C | 2.213876  | -3.345444 | -4.527483 |
| H | 2.912199  | -4.126119 | -4.892538 |
| H | 1.183397  | -3.725358 | -4.688090 |
| H | 2.366247  | -3.249848 | -3.433232 |
| C | 2.324182  | -2.177221 | -6.789115 |
| H | 3.504249  | -1.706372 | -5.043970 |
| H | 3.031182  | -2.941653 | -7.173051 |
| H | 2.531778  | -1.222690 | -7.314026 |
| H | 1.297629  | -2.494546 | -7.069576 |
| C | 1.949606  | 2.795314  | -3.710981 |
| C | 3.197217  | 2.712637  | -2.818008 |
| H | 3.614822  | 3.726849  | -2.652932 |
| H | 4.005368  | 2.094113  | -3.258958 |
| H | 2.938867  | 2.302019  | -1.821844 |
| C | 2.272604  | 3.519596  | -5.033567 |
| H | 1.207067  | 3.410086  | -3.164689 |
| H | 2.683784  | 4.531642  | -4.838068 |
| H | 1.371606  | 3.631578  | -5.669513 |
| H | 3.025206  | 2.953847  | -5.621906 |
| H | 1.806086  | -1.582916 | 6.135490  |
| H | 1.414109  | 4.212237  | 5.069214  |
| H | -4.144051 | -1.561161 | 4.257377  |
| C | 2.116117  | -0.524324 | 5.988226  |
| H | 2.070301  | 4.535490  | 1.960430  |
| H | 4.239442  | -1.070019 | 6.081599  |
| H | -2.733344 | -2.825389 | 2.546605  |

|    |           |           |           |    |           |           |           |
|----|-----------|-----------|-----------|----|-----------|-----------|-----------|
| C  | 1.104363  | 0.101872  | 5.036610  | Br | 4.853945  | 1.180845  | -1.805576 |
| C  | 0.604271  | 4.423266  | 4.339459  | C  | -1.590190 | 3.244492  | -1.805576 |
| C  | 3.538763  | -0.539746 | 5.403807  | C  | -2.227373 | 4.280141  | -1.108947 |
| H  | 3.930536  | 0.489007  | 5.262711  | C  | -2.445083 | 5.525867  | -1.808608 |
| C  | 1.293597  | 1.392281  | 4.513231  | C  | -2.915533 | 6.707541  | -1.159249 |
| C  | -3.247369 | -0.986349 | 4.569428  | C  | -2.147476 | 5.603504  | -3.220791 |
| H  | 1.063580  | 0.135643  | 7.802332  | C  | -2.417322 | 6.814162  | -3.926857 |
| C  | -0.063014 | -0.585200 | 4.669521  | C  | -1.513114 | 4.503837  | -3.869007 |
| C  | 2.081438  | 0.166053  | 7.364436  | H  | -1.235986 | 4.601854  | -4.930047 |
| H  | 2.780258  | -0.321543 | 8.075941  | C  | -1.163827 | 3.357112  | -3.169469 |
| H  | -0.225653 | -1.598007 | 5.071962  | C  | -1.950425 | 3.307125  | 2.600790  |
| C  | 1.930413  | 3.510516  | 2.362111  | C  | -3.184304 | 3.718971  | 3.086861  |
| H  | 0.746884  | 5.460707  | 3.971909  | H  | -3.412154 | 3.588310  | 4.155651  |
| H  | -0.358665 | 4.381838  | 4.887875  | C  | -4.199435 | 4.227787  | 2.225922  |
| C  | 0.354826  | 2.000074  | 3.661719  | C  | -5.495435 | 4.549088  | 2.729329  |
| C  | -1.838191 | -2.276508 | 2.901467  | C  | -3.938577 | 4.351130  | 0.811412  |
| C  | -1.025660 | -0.035735 | 3.801682  | C  | -5.028371 | 4.708709  | -0.039951 |
| H  | -3.584959 | 0.010940  | 4.915992  | C  | -2.610522 | 4.071597  | 0.315345  |
| H  | -2.799270 | -1.505928 | 5.442873  | C  | -1.672585 | 3.541406  | 1.214886  |
| C  | 0.623288  | 3.421200  | 3.170116  | O  | -1.378936 | 2.032371  | -1.191301 |
| C  | -0.823612 | 1.284194  | 3.310688  | O  | -0.393981 | 3.252133  | 0.776859  |
| C  | -2.237764 | -0.881981 | 3.411594  | P  | -0.139669 | 1.851587  | -0.083093 |
| H  | 1.912435  | 2.805885  | 1.507868  | O  | 1.214031  | 2.176664  | -0.773673 |
| H  | -1.148678 | -2.182264 | 2.040843  | O  | -0.384551 | 0.567060  | 0.647262  |
| H  | 2.816094  | 3.277805  | 2.990227  | C  | -2.915280 | 7.928910  | -3.271073 |
| H  | 3.563629  | -1.047197 | 4.418995  | C  | -3.145008 | 7.877144  | -1.870940 |
| H  | -1.367620 | -2.892194 | 3.697892  | H  | -2.198772 | 6.850588  | -5.005705 |
| H  | 2.375421  | 1.233191  | 7.279383  | H  | -3.111025 | 8.858055  | -3.827258 |
| H  | -0.202518 | 3.706916  | 2.488276  | H  | -3.089599 | 6.686372  | -0.074984 |
| H  | -2.740242 | -0.372268 | 2.565064  | H  | -3.503857 | 8.773138  | -1.341355 |
| H  | 2.201730  | 1.954414  | 4.784036  | C  | -6.283972 | 4.994074  | 0.478440  |
| C  | 1.869750  | -3.586063 | 3.816072  | C  | -6.518595 | 4.934285  | 1.876933  |
| C  | 2.017369  | -2.870127 | 2.624417  | H  | -4.866819 | 4.748041  | -1.126334 |
| C  | 3.287686  | -2.823217 | 1.998852  | H  | -7.105480 | 5.262242  | -0.204456 |
| C  | 4.400916  | -3.465547 | 2.590201  | H  | -7.515908 | 5.172458  | 2.278508  |
| C  | 4.243060  | -4.176029 | 3.785890  | H  | -5.672117 | 4.462145  | 3.812662  |
| C  | 2.975547  | -4.241271 | 4.392064  | C  | 1.149008  | 2.658979  | -3.856196 |
| H  | 0.886885  | -3.629229 | 4.307501  | C  | -0.220947 | 2.312086  | -3.675155 |
| H  | 1.176285  | -2.328615 | 2.162785  | C  | 2.086703  | 1.619159  | -4.090104 |
| C  | 3.456080  | -2.129910 | 0.722547  | C  | -0.628058 | 0.952678  | -3.792139 |
| H  | 5.385688  | -3.408747 | 2.099342  | C  | 0.334685  | -0.043191 | -4.042626 |
| H  | 5.103890  | -4.682745 | 4.247597  | C  | 1.699048  | 0.254003  | -4.191907 |
| H  | 2.848964  | -4.803910 | 5.330375  | H  | 3.136526  | 1.884039  | -4.301186 |
| O  | 2.509182  | -1.619593 | 0.106496  | C  | -2.094956 | 0.546287  | -3.693564 |
| H  | 4.492985  | -2.070681 | 0.296848  | H  | 0.002664  | -1.087951 | -4.119191 |
| C  | 0.490073  | -8.250819 | 0.278139  | C  | -2.327439 | -0.620096 | -2.717712 |
| C  | 0.101267  | -7.247403 | -0.546970 | H  | -1.886297 | -1.566998 | -3.092604 |
| C  | 1.316873  | -6.430551 | -0.853027 | H  | -3.413833 | -0.796990 | -2.588890 |
| O  | 2.404016  | -7.018686 | -0.247349 | H  | -1.892516 | -0.400941 | -1.723422 |
| C  | 1.970056  | -8.161162 | 0.495996  | C  | -2.645441 | 0.234294  | -5.099318 |
| O  | 1.391189  | -5.404630 | -1.499674 | H  | -2.656941 | 1.419720  | -3.308409 |
| C  | -1.205450 | -6.889811 | -1.133477 | H  | -2.119339 | -0.632213 | -5.553974 |
| H  | -1.997945 | -7.610584 | -0.848065 | H  | -2.525120 | 1.097803  | -5.783197 |
| H  | -0.141949 | -9.037881 | 0.713866  | H  | -3.724742 | -0.016019 | -5.047172 |
| H  | 2.255718  | -8.022424 | 1.564143  | C  | 2.748466  | -0.797162 | -4.531201 |
| H  | 2.506989  | -9.066816 | 0.128905  | C  | 2.361139  | -2.220206 | -4.110439 |
| Zn | -1.863120 | -5.076111 | -0.753207 | H  | 3.218505  | -2.907599 | -4.250511 |
| H  | -1.124655 | -6.884625 | -2.243540 | H  | 1.523488  | -2.617436 | -4.720704 |
| Br | -3.214303 | -3.299085 | -0.430548 | H  | 2.055000  | -2.260762 | -3.045729 |
|    |           |           |           | C  | 3.089588  | -0.734168 | -6.033351 |
|    |           |           |           | H  | 3.666922  | -0.511777 | -3.968032 |
|    |           |           |           | H  | 3.900691  | -1.448125 | -6.280441 |
|    |           |           |           | H  | 3.422914  | 0.278179  | -6.335141 |
|    |           |           |           | H  | 2.202258  | -0.995865 | -6.648587 |
|    |           |           |           | C  | 1.658831  | 4.097294  | -3.815282 |
|    |           |           |           | C  | 2.790727  | 4.317658  | -2.797739 |
|    |           |           |           | H  | 3.091243  | 5.384879  | -2.791920 |
|    |           |           |           | H  | 3.698600  | 3.721561  | -3.026009 |
|    |           |           |           | H  | 2.452705  | 4.056408  | -1.775399 |
|    |           |           |           | C  | 2.069078  | 4.549595  | -5.229903 |
|    |           |           |           | H  | 0.817028  | 4.739055  | -3.494129 |

### agg-7-j-ma

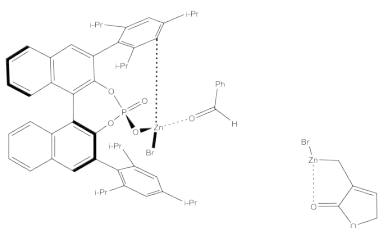

Energy (Hartree)= -11969.965166

|    |          |          |           |
|----|----------|----------|-----------|
| Zn | 2.501808 | 1.180845 | -1.805576 |
|----|----------|----------|-----------|

|    |           |            |           |
|----|-----------|------------|-----------|
| H  | 2.371077  | 5.617111   | -5.223237 |
| H  | 1.236224  | 4.433428   | -5.954384 |
| H  | 2.928943  | 3.960408   | -5.611543 |
| H  | 1.539983  | -0.973818  | 5.546243  |
| H  | 1.570566  | 4.970807   | 5.350648  |
| H  | -4.511940 | 0.049766   | 4.541833  |
| C  | 2.022090  | 0.013161   | 5.366027  |
| H  | 2.172780  | 5.653449   | 2.271944  |
| H  | 3.936385  | -0.931499  | 4.844762  |
| H  | -3.547304 | -1.175809  | 2.496093  |
| C  | 0.967061  | 0.906664   | 4.725981  |
| C  | 0.768751  | 5.341812   | 4.677892  |
| C  | 3.205067  | -0.220761  | 4.408960  |
| H  | 3.742462  | 0.727961   | 4.197221  |
| C  | 1.253144  | 2.236220   | 4.370789  |
| C  | -3.507086 | 0.466270   | 4.764220  |
| H  | 1.645194  | 0.694000   | 7.422454  |
| C  | -0.315705 | 0.415234   | 4.439713  |
| C  | 2.495137  | 0.557173   | 6.725220  |
| H  | 3.222926  | -0.134890  | 7.198502  |
| H  | -0.552792 | -0.624696  | 4.717268  |
| C  | 1.981003  | 4.600377   | 2.563328  |
| H  | 0.990830  | 6.403558   | 4.441467  |
| H  | -0.184957 | 5.306481   | 5.242150  |
| C  | 0.314517  | 3.054630   | 3.719592  |
| C  | -2.541350 | -0.814722  | 2.794833  |
| C  | -1.293420 | 1.187671   | 3.784316  |
| H  | -3.644868 | 1.460751   | 5.236437  |
| H  | -3.026291 | -0.192173  | 5.518758  |
| C  | 0.688492  | 4.498755   | 3.390456  |
| C  | -0.968965 | 2.524371   | 3.413810  |
| C  | -2.652877 | 0.555330   | 3.486333  |
| H  | 1.908777  | 3.995421   | 1.639726  |
| H  | -1.908616 | -0.735256  | 1.890170  |
| H  | 2.865665  | 4.254360   | 3.137919  |
| H  | 2.859135  | -0.632448  | 3.440296  |
| H  | -2.111855 | -1.584834  | 3.471261  |
| H  | 2.996667  | 1.540401   | 6.611506  |
| H  | -0.129389 | 4.924789   | 2.775132  |
| H  | -3.182240 | 1.219841   | 2.775720  |
| H  | 2.249190  | 2.651131   | 4.596156  |
| C  | 0.831114  | -2.832023  | 2.531226  |
| C  | 1.159231  | -2.059245  | 1.413620  |
| C  | 2.478561  | -2.118887  | 0.897831  |
| C  | 3.455721  | -2.936666  | 1.513254  |
| C  | 3.111767  | -3.715345  | 2.622838  |
| C  | 1.798524  | -3.660987  | 3.128627  |
| H  | -0.184210 | -2.773050  | 2.950943  |
| H  | 0.443672  | -1.351110  | 0.960589  |
| C  | 2.857457  | -1.281777  | -0.232961 |
| H  | 4.482809  | -2.952270  | 1.114577  |
| H  | 3.863561  | -4.356402  | 3.106076  |
| H  | 1.531900  | -4.263668  | 4.011084  |
| O  | 2.031729  | -0.651530  | -0.920784 |
| H  | 3.950383  | -1.182507  | -0.463178 |
| C  | 1.545201  | -17.884743 | 0.731767  |
| C  | 1.247261  | -16.966935 | -0.222617 |
| C  | 2.543098  | -16.343909 | -0.609504 |
| O  | 3.569288  | -16.918635 | 0.054211  |
| C  | 3.027776  | -17.905145 | 0.952278  |
| O  | 2.689006  | -15.403549 | -1.390817 |
| C  | 0.014896  | -16.468490 | -0.887530 |
| H  | -0.850243 | -16.422059 | -0.197272 |
| H  | 0.847742  | -18.538650 | 1.273638  |
| H  | 3.329258  | -17.627912 | 1.987539  |
| H  | 3.491403  | -18.890589 | 0.722636  |
| Zn | 0.532910  | -14.747618 | -1.762013 |
| H  | -0.275462 | -17.153050 | -1.715858 |
| Br | 0.382450  | -12.747724 | -2.837591 |

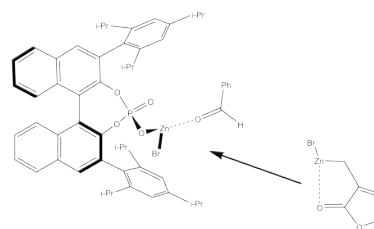

Energy (Hartree) = -11969.945713

|   |           |           |           |
|---|-----------|-----------|-----------|
| C | 1.165102  | 1.998690  | 2.307794  |
| C | 2.560844  | 2.002006  | 2.417187  |
| C | 3.219511  | 3.269754  | 2.634218  |
| C | 4.637968  | 3.425952  | 2.590009  |
| C | 2.415607  | 4.446640  | 2.867713  |
| C | 3.060408  | 5.692362  | 3.130306  |
| C | 0.997018  | 4.361729  | 2.766755  |
| H | 0.398817  | 5.275327  | 2.908969  |
| C | 0.357354  | 3.175092  | 2.431012  |
| C | 3.930642  | -1.144432 | 0.693485  |
| C | 4.986884  | -1.475670 | 1.533640  |
| H | 5.668438  | -2.291886 | 1.247424  |
| C | 5.192466  | -0.813178 | 2.779097  |
| C | 6.213242  | -1.236000 | 3.682108  |
| C | 4.338713  | 0.290235  | 3.151018  |
| C | 4.512190  | 0.874278  | 4.441291  |
| C | 3.331265  | 0.740706  | 2.221619  |
| C | 3.109857  | -0.032389 | 1.074393  |
| O | 0.505809  | 0.801422  | 2.107261  |
| O | 2.105348  | 0.332555  | 0.196794  |
| P | 0.516795  | 0.091306  | 0.609477  |
| O | -0.212125 | 1.083076  | -0.355090 |
| O | 0.031009  | -1.317427 | 0.731008  |
| C | 4.442702  | 5.798452  | 3.120939  |
| C | 5.233753  | 4.656764  | 2.827271  |
| H | 2.432456  | 6.576668  | 3.322903  |
| H | 4.926467  | 6.766989  | 3.319145  |
| H | 5.264332  | 2.555510  | 2.353659  |
| H | 6.329789  | 4.747004  | 2.780488  |
| C | 5.500666  | 0.423891  | 5.305548  |
| C | 6.370672  | -0.629904 | 4.919537  |
| H | 3.839494  | 1.686131  | 4.752045  |
| H | 5.606416  | 0.884554  | 6.299680  |
| H | 7.156889  | -0.973876 | 5.608779  |
| H | 6.865787  | -2.070764 | 3.381061  |
| C | -1.592177 | 3.700831  | 0.912924  |
| C | -1.102280 | 3.098442  | 2.109541  |
| C | -2.948895 | 3.536627  | 0.582095  |
| C | -1.987632 | 2.364773  | 2.943075  |
| C | -3.337715 | 2.236792  | 2.566993  |
| C | -3.842256 | 2.807360  | 1.387991  |
| H | -3.332000 | 3.995272  | -0.345069 |
| C | -1.531320 | 1.750355  | 4.264536  |
| H | -4.012700 | 1.669808  | 3.225029  |
| C | -1.802886 | 0.237649  | 4.333534  |
| H | -2.889331 | 0.012256  | 4.291849  |
| H | -1.415349 | -0.182185 | 5.284630  |
| H | -1.302523 | -0.288650 | 3.497833  |
| C | -2.161776 | 2.498260  | 5.455152  |
| H | -0.434171 | 1.891061  | 4.339899  |
| H | -3.267427 | 2.395874  | 5.458604  |
| H | -1.926751 | 3.581449  | 5.420061  |
| H | -1.784361 | 2.095455  | 6.417925  |
| C | -5.314613 | 2.718492  | 0.998298  |
| C | -6.041128 | 1.492096  | 1.566278  |
| H | -7.064842 | 1.418182  | 1.146346  |
| H | -6.149602 | 1.558434  | 2.668951  |
| H | -5.504267 | 0.550462  | 1.335393  |
| C | -6.048962 | 4.018767  | 1.385675  |

#### 7.7.4 Pathway 12j-mi → 14j-mi

TS-7-j-mi; woelfling data

|    |           |           |           |
|----|-----------|-----------|-----------|
| H  | -5.343703 | 2.642771  | -0.113976 |
| H  | -7.107875 | 3.996944  | 1.053414  |
| H  | -5.563981 | 4.908735  | 0.937210  |
| H  | -6.038609 | 4.153948  | 2.487498  |
| C  | -0.711475 | 4.556997  | -0.001125 |
| C  | -0.707017 | 4.106405  | -1.472655 |
| H  | -0.170916 | 4.834782  | -2.113663 |
| H  | -1.724190 | 3.977330  | -1.895513 |
| H  | -0.135350 | 3.157694  | -1.568457 |
| C  | -1.109676 | 6.041912  | 0.114042  |
| H  | 0.333173  | 4.468673  | 0.355604  |
| H  | -0.428977 | 6.682440  | -0.484150 |
| H  | -1.067402 | 6.386418  | 1.167021  |
| H  | -2.144757 | 6.213677  | -0.248410 |
| H  | 1.766851  | -4.810127 | -3.915360 |
| H  | 5.491201  | -0.331577 | -3.703607 |
| H  | 3.800103  | -5.941548 | 1.573077  |
| C  | 1.881259  | -3.724202 | -4.130881 |
| H  | 3.880131  | 2.224205  | -2.630918 |
| H  | -0.026545 | -3.594202 | -5.223865 |
| H  | 1.673912  | -4.676816 | 2.345317  |
| C  | 2.536713  | -3.099876 | -2.905094 |
| C  | 5.629826  | 0.041440  | -2.667139 |
| C  | 0.470159  | -3.137713 | -4.341132 |
| H  | 0.512564  | -2.040616 | -4.506154 |
| C  | 3.085218  | -1.805473 | -2.947061 |
| C  | 3.708435  | -5.420634 | 0.597512  |
| H  | 3.759327  | -4.004730 | -5.239313 |
| C  | 2.574722  | -3.787917 | -1.682524 |
| C  | 2.742254  | -3.592127 | -5.398186 |
| H  | 2.279619  | -4.133071 | -6.249272 |
| H  | 2.165804  | -4.810715 | -1.642381 |
| C  | 3.382098  | 1.232443  | -2.626954 |
| H  | 6.154957  | 1.017770  | -2.725454 |
| H  | 6.291842  | -0.675467 | -2.140231 |
| C  | 3.613356  | -1.184242 | -1.804707 |
| C  | 1.648497  | -4.140083 | 1.373425  |
| C  | 3.090746  | -3.213836 | -0.504214 |
| H  | 4.720501  | -5.347701 | 0.148764  |
| H  | 3.097164  | -6.071704 | -0.061910 |
| C  | 4.276338  | 0.186265  | -1.943849 |
| C  | 3.579626  | -1.878081 | -0.560579 |
| C  | 3.067177  | -4.033851 | 0.786199  |
| H  | 2.416564  | 1.332973  | -2.096054 |
| H  | 1.199265  | -3.139634 | 1.524442  |
| H  | 3.156790  | 0.970823  | -3.680860 |
| H  | -0.170664 | -3.311326 | -3.451519 |
| H  | 0.971834  | -4.697639 | 0.691729  |
| H  | 2.854280  | -2.532472 | -5.708019 |
| H  | 4.499746  | 0.561248  | -0.924422 |
| H  | 3.680930  | -3.496589 | 1.535044  |
| C  | 3.094178  | -1.253376 | -3.899386 |
| C  | -6.168756 | -5.434073 | -5.992406 |
| C  | -5.067598 | -5.018330 | -5.320225 |
| C  | -4.965769 | -3.541272 | -5.514635 |
| O  | -5.949464 | -3.141015 | -6.385705 |
| C  | -6.764767 | -4.269852 | -6.723143 |
| O  | -4.190196 | -2.770406 | -4.980570 |
| C  | -4.054697 | -5.736986 | -4.524177 |
| H  | -4.344232 | -6.788410 | -4.329615 |
| H  | -6.567150 | -6.457137 | -6.045475 |
| H  | -6.754191 | -4.421463 | -7.827698 |
| H  | -7.817219 | -4.046463 | -6.434808 |
| Zn | -3.471892 | -4.910377 | -2.842820 |
| H  | -3.090957 | -5.748542 | -5.083834 |
| Br | -2.512311 | -4.855376 | -0.789330 |
| Zn | -0.839439 | 1.166606  | -2.128579 |
| Br | -0.129946 | 0.958560  | -4.287883 |
| C  | -3.225491 | -1.650510 | 0.758598  |
| C  | -3.069660 | -0.577717 | -0.118978 |
| C  | -4.051851 | -0.316838 | -1.105212 |

|   |           |           |           |
|---|-----------|-----------|-----------|
| C | -5.205566 | -1.137348 | -1.190794 |
| C | -5.357435 | -2.209840 | -0.307900 |
| C | -4.369628 | -2.463581 | 0.664547  |
| H | -2.428134 | -1.859964 | 1.485957  |
| H | -2.194885 | 0.079583  | -0.031319 |
| C | -3.901128 | 0.795194  | -2.028307 |
| H | -5.964347 | -0.932383 | -1.962782 |
| H | -6.240664 | -2.862779 | -0.375463 |
| H | -4.485772 | -3.319316 | 1.346050  |
| O | -2.870358 | 1.472268  | -2.209799 |
| H | -4.807866 | 1.072637  | -2.624833 |

### agg-7-j-mi

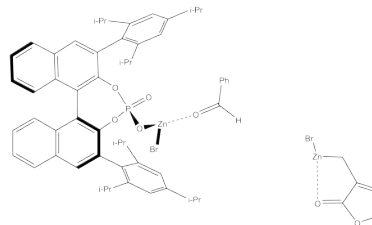

Energy (Hartree) = -11969.950117

|   |           |           |          |
|---|-----------|-----------|----------|
| C | 1.966380  | 2.711877  | 3.038038 |
| C | 3.367194  | 2.711877  | 3.038038 |
| C | 4.042711  | 3.989968  | 3.038038 |
| C | 5.456537  | 4.124074  | 2.888315 |
| C | 3.256735  | 5.197585  | 3.155635 |
| C | 3.919886  | 6.460330  | 3.205501 |
| C | 1.834347  | 5.118259  | 3.136982 |
| H | 1.250526  | 6.051826  | 3.160009 |
| C | 1.172047  | 3.903831  | 3.013559 |
| C | 4.469705  | -0.671383 | 1.598402 |
| C | 5.567669  | -0.975123 | 2.392205 |
| H | 6.158761  | -1.878319 | 2.176400 |
| C | 5.926762  | -0.168751 | 3.512271 |
| C | 7.002982  | -0.540704 | 4.371596 |
| C | 5.175820  | 1.030170  | 3.806078 |
| C | 5.503721  | 1.760379  | 4.987135 |
| C | 4.102679  | 1.419418  | 2.922557 |
| C | 3.752749  | 0.531026  | 1.896878 |
| O | 1.291586  | 1.505397  | 3.079729 |
| O | 2.674469  | 0.831398  | 1.081390 |
| P | 1.155407  | 0.586766  | 1.711553 |
| O | 0.253968  | 1.376586  | 0.716086 |
| O | 0.781434  | -0.813754 | 2.081832 |
| C | 5.299689  | 6.549951  | 3.101071 |
| C | 6.068651  | 5.370292  | 2.920658 |
| H | 3.307220  | 7.370046  | 3.309812 |
| H | 5.796744  | 7.531292  | 3.135182 |
| H | 6.066247  | 3.223519  | 2.736777 |
| H | 7.160368  | 5.441962  | 2.799842 |
| C | 6.546099  | 1.361270  | 5.812163 |
| C | 7.314033  | 0.209614  | 5.496648 |
| H | 4.909806  | 2.648692  | 5.244888 |
| H | 6.774659  | 1.938967  | 6.720588 |
| H | 8.143064  | -0.095022 | 6.153172 |
| H | 7.575662  | -1.449335 | 4.130881 |
| C | -0.767303 | 4.194563  | 1.432107 |
| C | -0.288905 | 3.784435  | 2.711186 |
| C | -2.101384 | 3.910504  | 1.087860 |
| C | -1.169123 | 3.135778  | 3.618610 |
| C | -2.495574 | 2.883621  | 3.225190 |
| C | -2.979201 | 3.241099  | 1.956045 |
| H | -2.473499 | 4.203085  | 0.092773 |
| C | -0.724867 | 2.736616  | 5.024511 |



|   |            |           |            |
|---|------------|-----------|------------|
| H | -3.166938  | 2.378235  | 3.936456   |
| C | -1.017827  | 1.261162  | 5.343188   |
| H | -2.108208  | 1.057579  | 5.389184   |
| H | -0.593421  | 0.988777  | 6.331509   |
| H | -0.571051  | 0.591682  | 4.582599   |
| C | -1.350697  | 3.679335  | 6.070247   |
| H | 0.373267   | 2.874836  | 5.079502   |
| H | -2.458079  | 3.599802  | 6.071072   |
| H | -1.090438  | 4.737416  | 5.865765   |
| H | -0.994060  | 3.427477  | 7.090613   |
| C | -4.415035  | 2.961979  | 1.531251   |
| C | -4.909888  | 1.568802  | 1.950498   |
| H | -5.901119  | 1.350202  | 1.502499   |
| H | -5.028590  | 1.491915  | 3.051520   |
| H | -4.203250  | 0.770157  | 1.644176   |
| C | -5.361899  | 4.064167  | 2.045463   |
| H | -4.426784  | 3.005125  | 0.418276   |
| H | -6.401389  | 3.897005  | 1.695500   |
| H | -5.036555  | 5.065402  | 1.699891   |
| H | -5.373268  | 4.081825  | 3.155354   |
| C | 0.102611   | 4.914163  | 0.398470   |
| C | 0.251134   | 4.129291  | -0.919040  |
| H | 0.785517   | 4.719714  | -1.690527  |
| H | -0.734841  | 3.858044  | -1.359115  |
| H | 0.865257   | 3.219549  | -0.749703  |
| C | -0.421021  | 6.339557  | 0.140466   |
| H | 1.123332   | 5.011158  | 0.816036   |
| H | 0.250156   | 6.888432  | -0.551808  |
| H | -0.487371  | 6.915635  | 1.084971   |
| H | -1.434313  | 6.326936  | -0.311318  |
| H | 1.973327   | -4.718734 | -2.536816  |
| H | 5.717091   | -0.546726 | -3.020702  |
| H | 4.343665   | -4.950570 | 3.251557   |
| C | 1.814305   | -3.627503 | -2.691811  |
| H | 4.473821   | -2.242550 | -2.088355  |
| H | -0.306705  | -3.894358 | -3.216933  |
| H | 1.925556   | -4.236426 | 3.626573   |
| C | 2.634199   | -2.911284 | -1.622143  |
| C | 6.004710   | -0.091861 | -2.049683  |
| C | 0.312857   | -3.343278 | -2.479592  |
| H | 0.103089   | -2.259327 | -2.593883  |
| C | 3.324732   | -1.713925 | -1.871198  |
| C | 4.304325   | -4.525053 | 2.226617   |
| H | 3.313077   | -3.453593 | -4.295195  |
| C | 2.663034   | -3.421472 | -0.310979  |
| C | 2.228276   | -3.292893 | -4.129948  |
| H | 1.674216   | -3.928092 | -4.850101  |
| H | 2.146748   | -4.373620 | -0.107167  |
| C | 3.890469   | 1.315264  | -1.909486  |
| H | 6.603482   | 0.816377  | -2.267028  |
| H | 6.656802   | -0.816742 | -1.519907  |
| C | 3.989023   | -1.009992 | -0.850116  |
| C | 1.884112   | -3.837568 | 2.592104   |
| C | 3.296756   | -2.751732 | 0.749553   |
| H | 5.323905   | -4.185596 | 1.955367   |
| H | 4.035689   | -5.346592 | 1.528001   |
| C | 4.761418   | 0.258696  | -1.209248  |
| C | 3.953367   | -1.517083 | 0.477331   |
| C | 3.280720   | -3.376264 | 2.145291   |
| H | 3.011655   | 1.573880  | -1.288053  |
| H | 1.184914   | -2.980306 | 2.575789   |
| H | 3.512821   | 0.963165  | -2.890296  |
| H | -0.016972  | -3.640088 | -1.463938  |
| H | 1.483363   | -4.648607 | 1.947542   |
| H | 1.995858   | -2.236955 | -4.382290  |
| H | 5.129365   | 0.709148  | -0.264927  |
| H | 3.597098   | -2.593690 | 2.863046   |
| H | 3.338638   | -1.299042 | -2.888533  |
| C | -12.399466 | -8.347426 | -12.583011 |
| C | -11.468330 | -7.928557 | -11.688667 |
| C | -11.054878 | -6.568989 | -12.134113 |

|    |            |           |            |
|----|------------|-----------|------------|
| O  | -11.762631 | -6.184745 | -13.217817 |
| C  | -12.636541 | -7.265466 | -13.592614 |
| O  | -10.163879 | -5.882015 | -11.632602 |
| C  | -10.803614 | -8.492085 | -10.483088 |
| H  | -11.455717 | -8.356567 | -9.590196  |
| H  | -12.927990 | -9.310958 | -12.598188 |
| H  | -12.384794 | -7.563337 | -14.635058 |
| H  | -13.684442 | -6.892119 | -13.596106 |
| Zn | -9.200205  | -7.342330 | -10.164088 |
| H  | -10.613704 | -9.580037 | -10.573808 |
| Br | -7.225312  | -6.587707 | -9.324407  |
| Zn | -0.347077  | 1.261836  | -1.056273  |
| Br | 0.217451   | 0.800853  | -3.221982  |
| C  | -1.619521  | -2.637496 | 0.701355   |
| C  | -1.841005  | -1.322770 | 0.287674   |
| C  | -2.987912  | -1.003627 | -0.479857  |
| C  | -3.925435  | -2.017415 | -0.800357  |
| C  | -3.691008  | -3.335427 | -0.395768  |
| C  | -2.538115  | -3.644289 | 0.350281   |
| H  | -0.722808  | -2.857076 | 1.299208   |
| H  | -1.137935  | -0.545957 | 0.617958   |
| C  | -3.232006  | 0.352149  | -0.958164  |
| H  | -4.824766  | -1.763603 | -1.383952  |
| H  | -4.407676  | -4.127762 | -0.658738  |
| H  | -2.358986  | -4.682546 | 0.670392   |
| O  | -2.409287  | 1.284748  | -0.991308  |
| H  | -4.266191  | 0.565201  | -1.333503  |

## 7.8 Interconversion of Complexes 14 - Mechanism 1

### 7.8.1 Pathway 14j-ma ↔ 14d-ma

#### jma-dma-TS1-mech1; COSMO

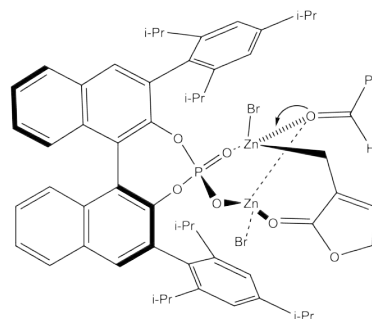

Energy (Hartree) = -11970.02355299

|    |            |           |            |
|----|------------|-----------|------------|
| Zn | 2.7431148  | 1.0438682 | 0.8458810  |
| Br | 4.9511147  | 0.7006529 | 0.2591669  |
| H  | 1.9313901  | 6.1220841 | 1.1186878  |
| Br | -2.3822538 | 4.3629694 | -0.4271883 |
| H  | -1.6128396 | 3.1750805 | 3.0614624  |
| Zn | -1.3065197 | 2.5499229 | 0.6268935  |
| C  | 0.3691691  | 5.1680936 | 2.3151355  |
| C  | 1.7701523  | 5.6367945 | 2.1086581  |
| C  | 0.3558020  | 3.8041408 | 2.4516012  |
| C  | -0.7126649 | 2.8077668 | 2.5331769  |
| C  | 1.7681005  | 3.3838790 | 2.3487881  |
| O  | 2.5799443  | 4.4429374 | 2.1452611  |
| O  | 2.2242733  | 2.2319514 | 2.4179671  |
| H  | 2.1512427  | 6.3301746 | 2.8915237  |
| H  | -0.3606170 | 1.8561612 | 2.9707554  |
| H  | -0.5046579 | 5.8322796 | 2.2904203  |
| C  | 0.5884218  | 6.0847711 | -2.3572570 |
| C  | 0.9842849  | 4.8985589 | -1.7358497 |

|   |            |            |            |   |            |            |            |
|---|------------|------------|------------|---|------------|------------|------------|
| C | 2.3617614  | 4.6108030  | -1.5848613 | H | 1.2199445  | 2.1069481  | 8.3391561  |
| C | 3.3368013  | 5.5188106  | -2.0634201 | H | 1.5752755  | 0.4353155  | 7.7853381  |
| C | 2.9335387  | 6.7054388  | -2.6853008 | H | -0.1182397 | 0.9411415  | 8.0637445  |
| C | 1.5613960  | 6.9850524  | -2.8332022 | C | 2.1991454  | -2.3875771 | 3.7113408  |
| H | -0.4855391 | 6.3008106  | -2.4623100 | C | 3.3910230  | -1.7018054 | 3.0310272  |
| H | 0.2274758  | 4.1930189  | -1.3622113 | H | 4.2042601  | -2.4301409 | 2.8350573  |
| C | 2.7908344  | 3.3777431  | -0.9385917 | H | 3.8273121  | -0.8845220 | 3.6406498  |
| H | 4.4059336  | 5.2806509  | -1.9455135 | H | 3.0945279  | -1.2799574 | 2.0526453  |
| H | 3.6849565  | 7.4157833  | -3.0611187 | C | 2.6458339  | -3.1690873 | 4.9632009  |
| H | 1.2472575  | 7.9179795  | -3.3268330 | H | 1.8035320  | -3.1254295 | 2.9861737  |
| O | 1.9968750  | 2.5684102  | -0.4234146 | H | 3.4172553  | -3.9231505 | 4.7027414  |
| C | -0.9590500 | -2.4737456 | 1.3925351  | H | 1.7951643  | -3.6967481 | 5.4409450  |
| C | -1.1420575 | -3.4453884 | 0.4023820  | H | 3.0812021  | -2.4890847 | 5.7252094  |
| C | -0.8665520 | -4.8215817 | 0.7492439  | H | 0.9974027  | 3.3300664  | -6.0462079 |
| C | -0.8325346 | -5.8736524 | -0.2150966 | H | 2.9735656  | -2.1893638 | -5.4441789 |
| C | -0.5787318 | -5.1528521 | 2.1243367  | H | -4.5035285 | 0.6593225  | -4.9750425 |
| C | -0.3452802 | -6.5144796 | 2.4823311  | C | 1.7417639  | 2.5282531  | -5.8440266 |
| C | -0.4770852 | -4.1129479 | 3.0910204  | H | 3.5131302  | -2.5684012 | -2.3188512 |
| H | -0.2357145 | -4.3766022 | 4.1323165  | H | 3.3315232  | 3.9993482  | -5.4739663 |
| C | -0.6016039 | -2.7731119 | 2.7447884  | H | -3.8877288 | 2.2154042  | -2.9905882 |
| C | -1.1488219 | -1.7536362 | -3.0574168 | C | 0.9984738  | 1.4124233  | -5.1204056 |
| C | -2.1500919 | -2.4781681 | -3.6954979 | C | 2.2836840  | -2.7940377 | -4.8190410 |
| H | -2.3482039 | -2.2904827 | -4.7612353 | C | 2.8485203  | 3.1386137  | -4.9660138 |
| C | -2.9640761 | -3.4183863 | -3.0031880 | H | 3.6425011  | 2.3961632  | -4.7400776 |
| C | -4.0540496 | -4.0715620 | -3.6532473 | C | 1.6658633  | 0.2620402  | -4.6680098 |
| C | -2.7072725 | -3.6928918 | -1.6104144 | C | -3.4258889 | 0.5132245  | -5.1950440 |
| C | -3.6022641 | -4.5624844 | -0.9175694 | H | 1.4848834  | 1.6569844  | -7.8458283 |
| C | -1.5778280 | -3.0606256 | -0.9710784 | C | -0.3783446 | 1.5016037  | -4.8773364 |
| C | -0.8890492 | -2.0741793 | -1.6884115 | C | 2.2936517  | 2.0545605  | -7.2005674 |
| O | -1.1827886 | -1.1359829 | 1.0764936  | H | 2.7911215  | 2.8861312  | -7.7418264 |
| O | 0.1677667  | -1.4078598 | -1.0801493 | H | -0.9152449 | 2.4020642  | -5.2158544 |
| P | -0.1139317 | -0.3292398 | 0.1191534  | C | 2.9901925  | -1.6500022 | -2.6563848 |
| O | 1.2493722  | -0.1920882 | 0.8047467  | H | 2.8238076  | -3.7157816 | -4.5184107 |
| O | -0.8661660 | 0.9087697  | -0.3803815 | H | 1.4265141  | -3.0899061 | -5.4572584 |
| C | -0.3526522 | -7.5158935 | 1.5240693  | C | 1.0049541  | -0.7781322 | -3.9920166 |
| C | -0.5810569 | -7.1854848 | 0.1622063  | C | -2.8397628 | 2.1230980  | -3.3357247 |
| H | -0.1383981 | -6.7503597 | 3.5381309  | C | -1.0924024 | 0.4983266  | -4.1949399 |
| H | -0.1630678 | -8.5609934 | 1.8125491  | H | -3.2980239 | -0.5039878 | -5.6160553 |
| H | -0.9975777 | -5.6343371 | -1.2742864 | H | -3.1412636 | 1.2365770  | -5.9879763 |
| H | -0.5525832 | -7.9751224 | -0.6040361 | C | 1.8121844  | -2.0087106 | -3.5805586 |
| C | -4.6660076 | -5.1655749 | -1.5737251 | C | -0.3955608 | -0.6642159 | -3.7565578 |
| C | -4.8872275 | -4.9335656 | -2.9572477 | C | -2.5782984 | 0.7298469  | -3.9272846 |
| H | -3.4479134 | -4.7444370 | 0.1549543  | H | 2.6453473  | -1.1079391 | -1.7544878 |
| H | -5.3470976 | -5.8245213 | -1.0138650 | H | -2.1964738 | 2.3087496  | -2.4548449 |
| H | -5.7293061 | -5.4241012 | -3.4686921 | H | 3.7404651  | -1.0161353 | -3.1737382 |
| H | -4.2309999 | -3.8604394 | -4.7196141 | H | 2.4395722  | 3.4975359  | -4.0005007 |
| C | 1.0633353  | -1.4297701 | 4.0748899  | H | -2.6590740 | 2.9316765  | -4.0746413 |
| C | -0.2909331 | -1.6616249 | 3.6954912  | H | 3.0425923  | 1.2459531  | -7.0675904 |
| C | 1.3518647  | -0.3037087 | 4.8648688  | H | 1.1425469  | -2.6838963 | -3.0118122 |
| C | -1.3196697 | -0.8054994 | 4.1694191  | H | -2.9040160 | -0.0090619 | -3.1671131 |
| C | -0.9763876 | 0.2899517  | 4.9851088  | H | 2.7434332  | 0.1667040  | -4.8652376 |
| C | 0.3566637  | 0.5759271  | 5.3248712  | H | 3.8902376  | 3.1607440  | -0.8998290 |
| H | 2.4000428  | -0.1003682 | 5.1405340  |   |            |            |            |
| C | -2.7921413 | -1.0846569 | 3.8701827  |   |            |            |            |
| H | -1.7808682 | 0.9434562  | 5.3553436  |   |            |            |            |
| C | -3.4955775 | 0.0863370  | 3.1661399  |   |            |            |            |
| H | -3.5110044 | 1.0024744  | 3.7914031  |   |            |            |            |
| H | -4.5465609 | -0.1686174 | 2.9222475  |   |            |            |            |
| H | -2.9859336 | 0.3331866  | 2.2142055  |   |            |            |            |
| C | -3.5353042 | -1.4965326 | 5.1554260  |   |            |            |            |
| H | -2.8339088 | -1.9535301 | 3.1815053  |   |            |            |            |
| H | -3.5453694 | -0.6712422 | 5.8977378  |   |            |            |            |
| H | -3.0518949 | -2.3715817 | 5.6351520  |   |            |            |            |
| H | -4.5896811 | -1.7623027 | 4.9338780  |   |            |            |            |
| C | 0.7510967  | 1.7471851  | 6.2187572  |   |            |            |            |
| C | -0.1721380 | 2.9676030  | 6.1041189  |   |            |            |            |
| H | 0.2316245  | 3.8148176  | 6.6950956  |   |            |            |            |
| H | -1.1873644 | 2.7541515  | 6.4991922  |   |            |            |            |
| H | -0.2868529 | 3.3007949  | 5.0540889  |   |            |            |            |
| C | 0.8677122  | 1.2825952  | 7.6844288  |   |            |            |            |
| H | 1.7652671  | 2.0628137  | 5.8854052  |   |            |            |            |

### jma-dma-TS1-mech1

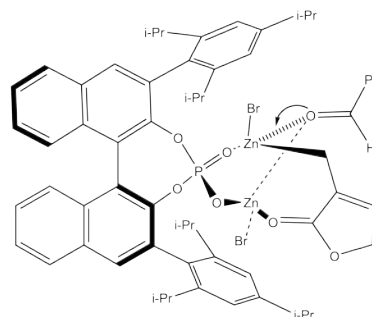

Energy (Hartree) = -11970.03844782  
number of imaginary frequencies: 2

|    |           |           |           |
|----|-----------|-----------|-----------|
| Zn | 1.9122575 | 1.2036967 | 1.4824326 |
| Br | 4.1562258 | 1.7501215 | 1.3481566 |

|    |            |            |            |   |            |            |            |
|----|------------|------------|------------|---|------------|------------|------------|
| H  | -0.6650778 | 5.4823545  | 2.6606033  | C | -3.7135800 | -2.0095644 | 2.0761034  |
| Br | -3.7586459 | 3.0081042  | -0.1847429 | H | -4.1180248 | -1.4001166 | 2.9106532  |
| H  | -3.1855421 | 1.1861757  | 3.0795231  | H | -4.5776117 | -2.4147233 | 1.5106726  |
| Zn | -2.3024244 | 1.3783856  | 0.7014908  | H | -3.1508211 | -1.3348936 | 1.4006576  |
| C  | -1.9409005 | 3.8096789  | 3.2579611  | C | -3.5948070 | -4.1433418 | 3.4606200  |
| C  | -0.7759218 | 4.7186457  | 3.4643890  | H | -2.4651843 | -3.7115730 | 1.6922275  |
| C  | -1.4963366 | 2.5239763  | 3.0899181  | H | -3.9892899 | -3.6525670 | 4.3749888  |
| C  | -2.1450494 | 1.2680556  | 2.7125662  | H | -2.9494102 | -4.9845156 | 3.7849669  |
| C  | -0.0262090 | 2.5980153  | 3.2029751  | H | -4.4586847 | -4.5650377 | 2.9061632  |
| O  | 0.3867599  | 3.8646349  | 3.4156350  | C | -0.8219308 | -0.4242409 | 6.4091862  |
| O  | 0.7854428  | 1.6638705  | 3.1101451  | C | -2.1010434 | 0.4233549  | 6.4236232  |
| H  | -0.7657008 | 5.2515885  | 4.4414618  | H | -2.1013374 | 1.1075387  | 7.2963530  |
| H  | -1.5496536 | 0.3869099  | 3.0142582  | H | -3.0107382 | -0.2073469 | 6.5086292  |
| H  | -2.9795212 | 4.1586768  | 3.1894141  | H | -2.1981264 | 1.0341937  | 5.5045545  |
| C  | -1.3601446 | 6.0562823  | -0.9951327 | C | -0.7225378 | -1.2923636 | 7.6797578  |
| C  | -0.6839808 | 4.9181886  | -0.5504758 | H | 0.0437540  | 0.2758939  | 6.4138662  |
| C  | 0.6756798  | 5.0142816  | -0.1696380 | H | -0.7715798 | -0.6682538 | 8.5963946  |
| C  | 1.3505766  | 6.2568382  | -0.2404259 | H | 0.2244439  | -1.8680145 | 7.7039968  |
| C  | 0.6675168  | 7.3928499  | -0.6880028 | H | -1.5579966 | -2.0225844 | 7.7170898  |
| C  | -0.6848998 | 7.2903460  | -1.0663687 | C | 2.3060984  | -2.8669542 | 3.2958251  |
| H  | -2.4185613 | 5.9710833  | -1.2842946 | C | 3.2118131  | -1.6487375 | 3.0595851  |
| H  | -1.2080097 | 3.9521579  | -0.4957289 | H | 4.2594758  | -1.9645984 | 2.8795362  |
| C  | 1.3990456  | 3.8360989  | 0.2887329  | H | 3.2232461  | -0.9472977 | 3.9187819  |
| H  | 2.4108603  | 6.3169492  | 0.0525510  | H | 2.8873492  | -1.0922897 | 2.1608844  |
| H  | 1.1854697  | 8.3616137  | -0.7484778 | C | 2.8878212  | -3.7936539 | 4.3815278  |
| H  | -1.2186827 | 8.1853267  | -1.4225126 | C | 2.2942634  | -3.4391360 | 2.3474593  |
| O  | 0.8649418  | 2.1797192  | 0.4306299  | H | 3.9070699  | -4.1337418 | 4.1043558  |
| C  | -0.2895989 | -3.2977321 | 0.3887669  | H | 2.2545824  | -4.6916077 | 4.5328907  |
| C  | 0.0217410  | -3.9708299 | -0.7978108 | H | 2.9602622  | -3.2727211 | 5.3592435  |
| C  | 0.7231898  | -5.2308075 | -0.6927478 | H | 0.4367379  | 4.6152877  | -5.0463566 |
| C  | 1.2634836  | -5.9159173 | -1.8227105 | H | 4.1849908  | 0.0966810  | -5.1312666 |
| C  | 0.9190097  | -5.8158254 | 0.6121298  | H | -3.7887519 | 0.1675110  | -5.8438624 |
| C  | 1.5706636  | -7.0809200 | 0.7212548  | C | 1.3837366  | 4.0712039  | -4.8342336 |
| C  | 0.5122029  | -5.0979686 | 1.7721685  | H | 4.3713168  | -0.9696607 | -2.1266334 |
| H  | 0.6905558  | -5.5434954 | 2.7630472  | H | 2.2590404  | 5.8344574  | -3.8592999 |
| C  | -0.0311230 | -3.8211069 | 1.6936675  | H | -4.1043528 | 1.1156587  | -3.4454570 |
| C  | -0.1086370 | -1.4949896 | -3.7414659 | C | 1.0008007  | 2.6313813  | -4.5139807 |
| C  | -0.6676828 | -2.2962934 | -4.7307357 | C | 3.6824590  | -0.8477818 | -4.8349726 |
| H  | -0.7621858 | -1.8976225 | -5.7518814 | C | 2.0547994  | 4.7661307  | -3.6378880 |
| C  | -1.1748137 | -3.5967610 | -4.4526067 | C | 3.0230652  | 4.2872258  | -3.3806971 |
| C  | -1.8437685 | -4.3583838 | -5.4574075 | H | 1.9736334  | 1.6750265  | -4.1738348 |
| C  | -1.0442697 | -4.1427878 | -3.1233771 | C | -2.7178752 | 0.4576429  | -5.8163544 |
| C  | -1.6555225 | -5.4031995 | -2.8495492 | H | 1.7552245  | 3.6907780  | -6.9682330 |
| C  | -0.3291969 | -3.3851750 | -2.1230924 | C | -0.3361719 | 2.2106744  | -4.5702497 |
| C  | 0.0453780  | -2.0744394 | -2.4443083 | C | 2.2607704  | 4.1526808  | -6.0965683 |
| O  | -0.9417677 | -2.0699204 | 0.3212689  | H | 2.4951953  | 5.2073135  | -6.3511902 |
| O  | 0.6775678  | -1.2902636 | -1.4887636 | H | -1.1121997 | 2.9532092  | -4.8171596 |
| P  | -0.1255960 | -0.7351818 | -0.1745980 | C | 3.5996340  | -0.2107959 | -2.3699953 |
| O  | 0.9894497  | -0.3638679 | 0.8065268  | H | 4.4737967  | -1.5969676 | -4.6248047 |
| O  | -1.2049977 | 0.2930949  | -0.5383848 | H | 3.0952231  | -1.2018857 | -5.7065314 |
| C  | 2.0527104  | -7.7350058 | -0.4017049 | C | 1.6487445  | 0.3326549  | -3.9127519 |
| C  | 1.9120385  | -7.1347540 | -1.6807245 | C | -3.0620551 | 1.4869436  | -3.5237110 |
| H  | 1.7010235  | -7.5181319 | 1.7237105  | C | -0.7214958 | 0.8809198  | -4.3128938 |
| H  | 2.5605893  | -8.7063956 | -0.3026269 | H | -2.1497864 | -0.2743799 | -6.4246942 |
| H  | 1.1727907  | -5.4613145 | -2.8184022 | H | -2.6229403 | 1.4449336  | -6.3155542 |
| H  | 2.3262563  | -7.6361479 | -2.5687213 | C | 2.7830112  | -0.6430048 | -3.6010540 |
| C  | -2.3181863 | -6.1092303 | -3.8438319 | C | 0.2860949  | -0.0741980 | -3.9965149 |
| C  | -2.4004293 | -5.5936604 | -5.1645355 | C | -2.2076804 | 0.5264999  | -4.3644638 |
| H  | -1.6060065 | -5.8113014 | -1.8305535 | H | 2.9556332  | -0.0909840 | -1.4780936 |
| H  | -2.7885872 | -7.0749430 | -3.6036360 | H | -2.6652593 | 1.5861546  | -2.4963243 |
| H  | -2.9209522 | -6.1667643 | -5.9468333 | H | 4.1271008  | 0.7510028  | -2.5378133 |
| H  | -1.9253475 | -3.9326919 | -6.4699412 | H | 1.4085946  | 4.7222117  | -2.7403822 |
| C  | 0.8632798  | -2.4900943 | 3.6375370  | H | -3.1120841 | 2.5043753  | -3.9643089 |
| C  | -0.2602949 | -2.9765992 | 2.9068182  | H | 3.2244021  | 3.6217040  | -5.9492163 |
| C  | 0.6324558  | -1.6480225 | 4.7388067  | H | 2.3332573  | -1.6289415 | -3.3685031 |
| C  | -1.5759836 | -2.6304903 | 3.3156491  | H | -2.3257453 | -0.4812719 | -3.9179399 |
| C  | -1.7478715 | -1.8103015 | 4.4469078  | H | 3.0310431  | 1.9805144  | -4.1204368 |
| C  | -0.6580428 | -1.2932986 | 5.1665355  | H | 2.4882173  | 3.9511539  | 0.5291309  |
| H  | 1.4974636  | -1.2470386 | 5.2926105  |   |            |            |            |
| C  | -2.8119752 | -3.1489431 | 2.5825343  |   |            |            |            |
| H  | -2.7713662 | -1.5559196 | 4.7610827  |   |            |            |            |

## 7.8.2 Pathway 14j-ma ↔ 14j-mi jma-jmi-TS1-mech1; COSMO

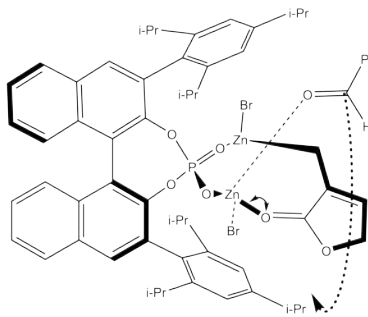

Energy (Hartree) = -11970.01367543

|    |            |            |            |
|----|------------|------------|------------|
| Zn | 2.4254352  | -1.6556915 | 0.8285053  |
| Br | 4.5606753  | -2.3170302 | 0.3815833  |
| Zn | -1.9353640 | 1.7909425  | 1.3906132  |
| Br | -3.0602313 | 2.7479010  | -0.4437508 |
| C  | -1.7869728 | -1.1117111 | -2.0559217 |
| C  | -1.6362576 | -0.3510432 | -3.2219694 |
| C  | -1.8763790 | -1.0120592 | -4.4860207 |
| C  | -1.5894554 | -0.4039559 | -5.7460556 |
| C  | -2.3927722 | -2.3605887 | -4.4881514 |
| C  | -2.6759553 | -3.0005728 | -5.7324879 |
| C  | -2.5534463 | -3.0555430 | -3.2554756 |
| H  | -2.9196077 | -4.0932974 | -3.2741668 |
| C  | -2.2013835 | -2.4802511 | -2.0415958 |
| C  | 0.6053659  | 2.6575462  | -2.3952282 |
| C  | 0.0095155  | 3.6628518  | -3.1454698 |
| H  | 0.4667959  | 4.6628784  | -3.1759149 |
| C  | -1.2190969 | 3.4520902  | -3.8370515 |
| C  | -1.8736189 | 4.5264133  | -4.5107778 |
| C  | -1.8418108 | 2.1500785  | -3.8198226 |
| C  | -3.1276610 | 2.0065828  | -4.4191799 |
| C  | -1.1635191 | 1.0617286  | -3.1600305 |
| C  | -0.0097675 | 1.3684336  | -2.4361284 |
| O  | -1.5715260 | -0.5255813 | -0.8084153 |
| O  | 0.6253412  | 0.3537587  | -1.7252226 |
| P  | -0.0628419 | -0.1399696 | -0.3199497 |
| O  | 0.7427943  | -1.4098501 | 0.0280025  |
| O  | -0.1868587 | 0.9567689  | 0.7351795  |
| C  | -2.4227123 | -2.3633581 | -6.9377420 |
| C  | -1.8559711 | -1.0611049 | -6.9397097 |
| H  | -3.0835194 | -4.0237106 | -5.7143945 |
| H  | -2.6398891 | -2.8706177 | -7.8901749 |
| H  | -1.1415994 | 0.5985412  | -5.7680899 |
| H  | -1.6196165 | -0.5685972 | -7.8953766 |
| C  | -3.7486415 | 3.0776753  | -5.0467755 |
| C  | -3.1114909 | 4.3456262  | -5.1096441 |
| H  | -3.6366524 | 1.0343724  | -4.3634716 |
| H  | -4.7467688 | 2.9446857  | -5.4914354 |
| H  | -3.6100341 | 5.1862948  | -5.6160226 |
| H  | -1.3836230 | 5.5127806  | -4.5259126 |
| C  | -1.1250928 | -4.1841364 | -0.5257731 |
| C  | -2.1672003 | -3.2419820 | -0.7539927 |
| C  | -1.0587446 | -4.8188341 | 0.7291927  |
| C  | -3.1172910 | -2.9660804 | 0.2656724  |
| C  | -3.0060513 | -3.6305732 | 1.4977440  |
| C  | -1.9750462 | -4.5495678 | 1.7584913  |
| H  | -0.2498770 | -5.5419978 | 0.9234729  |
| C  | -4.2563411 | -1.9745675 | 0.0446644  |
| H  | -3.7352744 | -3.4017296 | 2.2905021  |
| C  | -4.3508775 | -0.9384860 | 1.1751044  |
| H  | -4.7335132 | -1.3842074 | 2.1173017  |
| H  | -5.0272118 | -0.1061436 | 0.8936809  |
| H  | -3.3502912 | -0.5203978 | 1.3960611  |
| C  | -5.5914761 | -2.7101653 | -0.1717819 |
| H  | -4.0399780 | -1.4145086 | -0.8873221 |
| H  | -5.8651540 | -3.3090016 | 0.7225395  |

|   |            |            |            |
|---|------------|------------|------------|
| H | -5.5332133 | -3.4036280 | -1.0355662 |
| H | -6.4136777 | -1.9894593 | -0.3633225 |
| C | -1.8333225 | -5.2112355 | 3.1232600  |
| C | -1.5839863 | -4.1704268 | 4.2301348  |
| H | -1.3961658 | -4.6687893 | 5.2043793  |
| H | -2.4628601 | -3.5045068 | 4.3571149  |
| H | -0.7244354 | -3.5148125 | 3.9901454  |
| C | -3.0410917 | -6.1062824 | 3.4541221  |
| H | -0.9358682 | -5.8670463 | 3.0697513  |
| H | -2.8995401 | -6.6200006 | 4.4278752  |
| H | -3.1966363 | -6.8802298 | 2.6752646  |
| H | -3.9742871 | -5.5086991 | 3.5248640  |
| C | -0.0960686 | -4.5372825 | -1.6010665 |
| C | 1.3489789  | -4.5949763 | -1.0815057 |
| H | 2.0570386  | -4.7666045 | -1.9175053 |
| H | 1.5052566  | -5.4102618 | -0.3455347 |
| H | 1.6372316  | -3.6411816 | -0.6005837 |
| C | -0.4680258 | -5.8650238 | -2.2907862 |
| H | -0.1289846 | -3.7381069 | -2.3695425 |
| H | 0.2467205  | -6.1033291 | -3.1058364 |
| H | -1.4858801 | -5.8282999 | -2.7272904 |
| H | -0.4490215 | -6.7038002 | -1.5634367 |
| H | 4.6424154  | 3.3752941  | 2.3287353  |
| H | 5.2174955  | 2.1137164  | -3.4644486 |
| H | -0.3601406 | 6.4542897  | -0.2429949 |
| C | 5.0206916  | 2.8178101  | 1.4430835  |
| H | 3.6814145  | -0.6744341 | -3.7924665 |
| H | 6.0407738  | 1.3666227  | 2.7381518  |
| H | -1.0414872 | 4.7187410  | 1.5985400  |
| C | 3.9159942  | 2.8562104  | 0.3949338  |
| C | 4.2203152  | 2.0644627  | -3.9503560 |
| C | 5.3206847  | 1.3773865  | 1.8939669  |
| H | 5.7557893  | 0.7708937  | 1.0733832  |
| C | 4.0199855  | 2.1237449  | -0.8013908 |
| C | 0.5801241  | 5.8913141  | -0.4181407 |
| H | 6.0872231  | 4.5776936  | 0.6649029  |
| C | 2.7513682  | 3.6140758  | 0.5983549  |
| C | 6.2955718  | 3.5272750  | 0.9521673  |
| H | 7.0765680  | 3.5325858  | 1.7408348  |
| H | 2.6693859  | 4.2075788  | 1.5223145  |
| C | 3.6120232  | -0.1348107 | -2.8255162 |
| H | 4.3424178  | 1.5406659  | -4.9211769 |
| H | 3.8958261  | 3.1043818  | -4.1581755 |
| C | 2.9890427  | 2.1037280  | -1.7564695 |
| C | -0.0054377 | 4.3413382  | 1.4800937  |
| C | 1.6775650  | 3.6122927  | -0.3132246 |
| H | 0.8399166  | 5.9873202  | -1.4906124 |
| H | 1.3886752  | 6.3834562  | 0.1632842  |
| C | 3.2023252  | 1.3292093  | -3.0565486 |
| C | 1.7933321  | 2.8357189  | -1.5016232 |
| C | 0.4205434  | 4.4184738  | 0.0049165  |
| H | 2.8692379  | -0.6619658 | -2.1959260 |
| H | 0.0316685  | 3.2991095  | 1.8601055  |
| H | 4.5996830  | -0.2207993 | -2.3278493 |
| H | 4.3979164  | 0.8600544  | 2.2233214  |
| H | 0.6426623  | 4.9558814  | 2.1406104  |
| H | 6.7186360  | 3.0130300  | 0.0638345  |
| H | 2.2399894  | 1.3200684  | -3.6075620 |
| H | -0.4129389 | 3.9819426  | -0.5825136 |
| H | 4.9322363  | 1.5377635  | -0.9956923 |
| C | 2.1212273  | 2.8531761  | 4.2480621  |
| C | 2.0256219  | 1.5693759  | 3.7049275  |
| C | 2.5692170  | 0.4744867  | 4.4216431  |
| C | 3.2087522  | 0.6781517  | 5.6682357  |
| C | 3.3251564  | 1.9724264  | 6.1880211  |
| C | 2.7748219  | 3.0561878  | 5.4792913  |
| H | 1.6792124  | 3.7055477  | 3.7142845  |
| H | 1.5196970  | 1.3892936  | 2.7423420  |
| C | 2.4762977  | -0.8779557 | 3.8891981  |
| H | 3.6196256  | -0.1848013 | 6.2160568  |
| H | 3.8346796  | 2.1401784  | 7.1484285  |

|   |            |            |           |
|---|------------|------------|-----------|
| H | 2.8501368  | 4.0734184  | 5.8934084 |
| O | 2.1457606  | -1.1284189 | 2.7203746 |
| H | 2.7424266  | -1.7186373 | 4.5777641 |
| C | -1.2093822 | 1.2469709  | 5.4858596 |
| C | -1.6566607 | 0.9497774  | 4.2359950 |
| C | -1.0805130 | -0.3818681 | 3.8787749 |
| O | -0.3159760 | -0.8374441 | 4.9442775 |
| C | -0.3767177 | 0.1209469  | 6.0094536 |
| O | -1.1903618 | -1.0244076 | 2.8537214 |
| C | -2.5289616 | 1.6808037  | 3.3001734 |
| H | 0.6601327  | 0.4198615  | 6.2808515 |
| H | -0.8257482 | -0.3652661 | 6.9059047 |
| H | -2.7947120 | 2.6833354  | 3.6913098 |
| H | -3.4788301 | 1.1153797  | 3.1645080 |
| H | -1.4381215 | 2.1484369  | 6.0714312 |

### jma-jmi-TS1-mech1

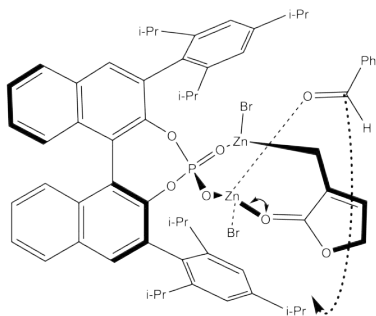

Energy (Hartree) = -11970.00008322  
number of imaginary frequencies: 1

|    |            |            |            |
|----|------------|------------|------------|
| Zn | 2.4282221  | -1.6576859 | 0.8173151  |
| Br | 4.5549606  | -2.3595472 | 0.4357475  |
| Zn | -1.9300288 | 1.7871084  | 1.3927802  |
| Br | -3.0387004 | 2.7656917  | -0.4254970 |
| C  | -1.7879429 | -1.1027558 | -2.0504787 |
| C  | -1.6421880 | -0.3416326 | -3.2168942 |
| C  | -1.8903931 | -1.0017017 | -4.4799468 |
| C  | -1.6106993 | -0.3932475 | -5.7411207 |
| C  | -2.4087168 | -2.3492245 | -4.4800275 |
| C  | -2.7003578 | -2.9872000 | -5.7228239 |
| C  | -2.5626105 | -3.0442798 | -3.2470136 |
| H  | -2.9300620 | -4.0815946 | -3.2628067 |
| C  | -2.2028612 | -2.4710912 | -2.0346663 |
| C  | 0.6141315  | 2.6594931  | -2.4044417 |
| C  | 0.0220888  | 3.6638709  | -3.1586550 |
| H  | 0.4853214  | 4.6608883  | -3.1945768 |
| C  | -1.2101164 | 3.4575363  | -3.8446703 |
| C  | -1.8613115 | 4.5317401  | -4.5208132 |
| C  | -1.8409476 | 2.1597398  | -3.8179134 |
| C  | -3.1306141 | 2.0213036  | -4.4094455 |
| C  | -1.1653945 | 1.0699240  | -3.1579506 |
| C  | -0.0075796 | 1.3736397  | -2.4396682 |
| O  | -1.5664856 | -0.5172661 | -0.8031958 |
| O  | 0.6273920  | 0.3582464  | -1.7299227 |
| P  | -0.0558776 | -0.1332296 | -0.3224905 |
| O  | 0.7507098  | -1.4062736 | 0.0162474  |
| O  | -0.1707667 | 0.9625262  | 0.7349068  |
| C  | -2.4541953 | -2.3497752 | -6.9287476 |
| C  | -1.8859601 | -1.0488812 | -6.9330768 |
| H  | -3.1089618 | -4.0098636 | -5.7027165 |
| H  | -2.6782632 | -2.8560620 | -7.8800369 |
| H  | -1.1620196 | 0.6086887  | -5.7644435 |
| H  | -1.6553361 | -0.5555406 | -7.8896387 |
| C  | -3.7473441 | 3.0927940  | -5.0394495 |
| C  | -3.1026401 | 4.3556572  | -5.1124677 |

|   |            |            |            |
|---|------------|------------|------------|
| H | -3.6449739 | 1.0526786  | -4.3444317 |
| H | -4.7489935 | 2.9640635  | -5.4770792 |
| H | -3.5985831 | 5.1970498  | -5.6199819 |
| H | -1.3657925 | 5.5151577  | -4.5423897 |
| C | -1.1154969 | -4.1748101 | -0.5262963 |
| C | -2.1611546 | -3.2354939 | -0.7488670 |
| C | -1.0429795 | -4.8116325 | 0.7268937  |
| C | -3.1081955 | -2.9644280 | 0.2742922  |
| C | -2.9906613 | -3.6311734 | 1.5043567  |
| C | -1.9567299 | -4.5479704 | 1.7595384  |
| H | -0.2323348 | -5.5339181 | 0.9165869  |
| C | -4.2508617 | -1.9763951 | 0.0575932  |
| H | -3.7187400 | -3.4070020 | 2.2995332  |
| C | -4.3434499 | -0.9403259 | 1.1876976  |
| H | -4.7192891 | -1.3858977 | 2.1327702  |
| H | -5.0219390 | -0.1089331 | 0.9092978  |
| H | -3.3426287 | -0.5190860 | 1.4008877  |
| C | -5.5842816 | -2.7158341 | -0.1545995 |
| H | -4.0396646 | -1.4151114 | -0.8748037 |
| H | -5.8534540 | -3.3164397 | 0.7397571  |
| H | -5.5263628 | -3.4090637 | -1.0183089 |
| H | -6.4093064 | -1.9978306 | -0.3433858 |
| C | -1.8129987 | -5.2182470 | 3.1199337  |
| C | -1.5718738 | -4.1862267 | 4.2364905  |
| H | -1.3826499 | -4.6915372 | 5.2067837  |
| H | -2.4549193 | -3.5268967 | 4.3692094  |
| H | -0.7147248 | -3.5247734 | 4.0046033  |
| C | -3.0155255 | -6.1240408 | 3.4398340  |
| H | -0.9111780 | -5.8679020 | 3.0629702  |
| H | -2.8743654 | -6.6451377 | 4.4096796  |
| H | -3.1641401 | -6.8915371 | 2.6536393  |
| H | -3.9529319 | -5.5335532 | 3.5120408  |
| C | -0.0915647 | -4.5246757 | -1.6075057 |
| C | 1.3555592  | -4.5892591 | -1.0953839 |
| H | 2.0605410  | -4.7551649 | -1.9349635 |
| H | 1.5151040  | -5.4104442 | -0.3667939 |
| H | 1.6492516  | -3.6398572 | -0.6090850 |
| C | -0.4697032 | -5.8482132 | -2.3017249 |
| H | -0.1259391 | -3.7216457 | -2.3719535 |
| H | 0.2401662  | -6.0849943 | -3.1213833 |
| H | -1.4894752 | -5.8074542 | -2.7327598 |
| H | -0.4503075 | -6.6902822 | -1.5784285 |
| H | 4.6394064  | 3.3756295  | 2.3305272  |
| H | 5.2299704  | 2.0784939  | -3.4512688 |
| H | -0.3352741 | 6.4731589  | -0.2866394 |
| C | 5.0163914  | 2.8101913  | 1.4490075  |
| H | 3.6778219  | -0.7033027 | -3.7664679 |
| H | 6.0202579  | 1.3569551  | 2.7561667  |
| H | -1.0345681 | 4.7582829  | 1.5652268  |
| C | 3.9155592  | 2.8511264  | 0.3968888  |
| C | 4.2349333  | 2.0317058  | -3.9415241 |
| C | 5.3035889  | 1.3700227  | 1.9090679  |
| H | 5.7368646  | 0.7541949  | 1.0946321  |
| C | 4.0196771  | 2.1125669  | -0.7951402 |
| C | 0.6024413  | 5.9034558  | -0.4525177 |
| H | 6.0987624  | 4.5569409  | 0.6643375  |
| C | 2.7554311  | 3.6177263  | 0.5910238  |
| C | 6.2982905  | 3.5070802  | 0.9589363  |
| H | 7.0776391  | 3.5108757  | 1.7492182  |
| H | 2.6741191  | 4.2179738  | 1.5108073  |
| C | 3.6066565  | -0.1557594 | -2.8042998 |
| H | 4.3590625  | 1.5007190  | -4.9080729 |
| H | 3.9186612  | 3.0722116  | -4.1577482 |
| C | 2.9932180  | 2.0946793  | -1.7547448 |
| C | 0.0001130  | 4.3750014  | 1.4563631  |
| C | 1.6855903  | 3.6187381  | -0.3248986 |
| H | 0.8673764  | 5.9886178  | -1.5244432 |
| H | 1.4123984  | 6.3964659  | 0.1261899  |
| C | 3.2076613  | 1.3093635  | -3.0480585 |
| C | 1.8011181  | 2.8353890  | -1.5088851 |
| C | 0.4328045  | 4.4354883  | -0.0173296 |

|   |            |            |            |
|---|------------|------------|------------|
| H | 2.8565007  | -0.6744287 | -2.1764947 |
| H | 0.0266679  | 3.3356049  | 1.8448085  |
| H | 4.5909853  | -0.2465742 | -2.3009501 |
| H | 4.3754321  | 0.8613103  | 2.2363346  |
| H | 0.6495028  | 4.9923035  | 2.1138402  |
| H | 6.7199104  | 2.9854738  | 0.0744746  |
| H | 2.2479045  | 1.3028853  | -3.6035588 |
| H | -0.4032225 | 3.9988363  | -0.6011915 |
| H | 4.9285021  | 1.5191505  | -0.9827022 |
| C | 2.0778664  | 2.8754082  | 4.2312720  |
| C | 1.9898943  | 1.5894778  | 3.6909292  |
| C | 2.5366011  | 0.4997675  | 4.4118878  |
| C | 3.1712643  | 0.7103034  | 5.6591414  |
| C | 3.2794843  | 2.0059342  | 6.1766577  |
| C | 2.7260508  | 3.0848978  | 5.4633830  |
| H | 1.6325629  | 3.7217873  | 3.6908966  |
| H | 1.4885058  | 1.4049259  | 2.7265035  |
| C | 2.4532903  | -0.8543654 | 3.8773695  |
| H | 3.5867880  | -0.1491443 | 6.2094263  |
| H | 3.7860889  | 2.1787552  | 7.1377673  |
| H | 2.7958064  | 4.1035582  | 5.8751583  |
| O | 2.1273087  | -1.1041297 | 2.7095761  |
| H | 2.7227226  | -1.6939749 | 4.5677418  |
| C | -1.2168309 | 1.2055649  | 5.5008641  |
| C | -1.6460310 | 0.9155259  | 4.2427635  |
| C | -1.0472321 | -0.4052153 | 3.8796449  |
| O | -0.2865095 | -0.8602280 | 4.9522022  |
| C | -0.3752687 | 0.0853347  | 6.0244118  |
| O | -1.1327735 | -1.0408384 | 2.8495727  |
| C | -2.5153676 | 1.6450183  | 3.3056877  |
| H | 0.6540516  | 0.3957851  | 6.3131797  |
| H | -0.8297013 | -0.4175735 | 6.9095341  |
| H | -2.8000167 | 2.6387157  | 3.7054539  |
| H | -3.4561284 | 1.0686172  | 3.1552311  |
| H | -1.4675910 | 2.0979109  | 6.0911503  |

### jma-jmi-TS2-mech1; COSMO

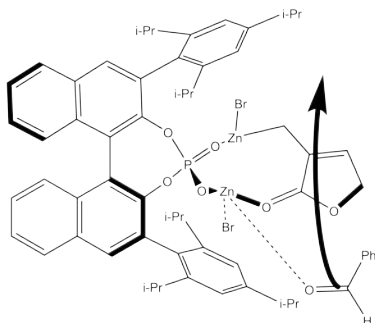

Energy (Hartree) = -11970.03225785

|    |            |            |            |
|----|------------|------------|------------|
| Zn | 1.6134665  | -0.6790572 | 1.8399508  |
| Br | 3.9143729  | -0.3311861 | 1.7725141  |
| Zn | -0.0836341 | 2.9326671  | 1.5181766  |
| Br | -1.9863105 | 3.4687864  | 2.7928336  |
| C  | -2.1344422 | -1.1235779 | -1.8679659 |
| C  | -1.8908664 | -0.8653527 | -3.2227787 |
| C  | -2.1940538 | -1.9149129 | -4.1704341 |
| C  | -1.8159791 | -1.8527335 | -5.5458421 |
| C  | -2.8821836 | -3.0980642 | -3.7099139 |
| C  | -3.2346686 | -4.1131447 | -4.6499016 |
| C  | -3.1291524 | -3.2718948 | -2.3176994 |
| H  | -3.6050519 | -4.2038561 | -1.9746971 |
| C  | -2.7017430 | -2.3420470 | -1.3777918 |
| C  | 0.5075560  | 2.1409200  | -3.3784320 |
| C  | 0.0144016  | 2.8213722  | -4.4865046 |
| H  | 0.5270609  | 3.7336556  | -4.8289474 |
| C  | -1.1794702 | 2.4169497  | -5.1492643 |
| C  | -1.7247009 | 3.1918839  | -6.2173295 |

|   |            |            |            |
|---|------------|------------|------------|
| C | -1.8857989 | 1.2423844  | -4.6958901 |
| C | -3.1534353 | 0.9516164  | -5.2846509 |
| C | -1.3020963 | 0.4365552  | -3.6479325 |
| C | -0.1568271 | 0.9289565  | -3.0094444 |
| O | -1.8738877 | -0.1437382 | -0.9206931 |
| O | 0.4011713  | 0.1971842  | -1.9635690 |
| P | -0.3507708 | 0.2961450  | -0.5056778 |
| O | 0.3321447  | -0.7545608 | 0.3834534  |
| O | -0.4732778 | 1.7329562  | -0.0164576 |
| C | -2.8872558 | -3.9999764 | -5.9877536 |
| C | -2.1534416 | -2.8677242 | -6.4312896 |
| H | -3.7717770 | -5.0024205 | -4.2839060 |
| H | -3.1588442 | -4.7934522 | -6.7006224 |
| H | -1.2394195 | -0.9893453 | -5.9046938 |
| H | -1.8429835 | -2.7952553 | -7.4848892 |
| C | -3.6681941 | 1.7388168  | -6.3059030 |
| C | -2.9412697 | 2.8577882  | -6.7929228 |
| H | -3.7329902 | 0.0955300  | -4.9129497 |
| H | -4.6515222 | 1.4957614  | -6.7367615 |
| H | -3.3542788 | 3.4683178  | -7.6103748 |
| H | -1.1663194 | 4.0767358  | -6.5615844 |
| C | -1.7405455 | -3.6140319 | 0.5570415  |
| C | -2.6506946 | -2.6227667 | 0.0893993  |
| C | -1.5841543 | -3.7780597 | 1.9460115  |
| C | -3.3900192 | -1.8383935 | 1.0187754  |
| C | -3.1718158 | -2.0277729 | 2.3936022  |
| C | -2.2576972 | -2.9789684 | 2.8819251  |
| H | -0.8771759 | -4.5389547 | 2.3142784  |
| C | -4.4468221 | -0.8346810 | 0.5626621  |
| H | -3.7304458 | -1.4027185 | 3.1076685  |
| C | -4.2715242 | 0.5545752  | 1.1970955  |
| H | -4.4189101 | 0.5330797  | 2.2966394  |
| H | -5.0159891 | 1.2656279  | 0.7833481  |
| H | -3.2640040 | 0.9708546  | 1.0063101  |
| C | -5.8579050 | -1.3996918 | 0.8196977  |
| H | -4.3441802 | -0.7138061 | -0.5352224 |
| H | -6.0360426 | -1.5493869 | 1.9055316  |
| H | -5.9983281 | -2.3792105 | 0.3184183  |
| H | -6.6358217 | -0.7039127 | 0.4419558  |
| C | -1.9946184 | -3.1338155 | 4.3744639  |
| C | -1.6375310 | -1.7929660 | 5.0387079  |
| H | -1.3092392 | -1.9486718 | 6.0873140  |
| H | -2.5094855 | -1.1065528 | 5.0614932  |
| H | -0.8249010 | -1.2720602 | 4.4952067  |
| C | -3.1730903 | -3.8232544 | 5.0864151  |
| H | -1.1106664 | -3.8037721 | 4.4751012  |
| H | -2.9548303 | -3.9730160 | 6.1644946  |
| H | -3.3940290 | -4.8124780 | 4.6368414  |
| H | -4.0935081 | -3.2068779 | 5.0107263  |
| C | -0.8929014 | -4.4764169 | -0.3801107 |
| C | 0.6166079  | -4.3117786 | -0.1326960 |
| H | 1.1939682  | -4.8554642 | -0.9088694 |
| H | 0.9218630  | -4.7222533 | 0.8519261  |
| H | 0.9081147  | -3.2442035 | -0.1575771 |
| C | -1.3190505 | -5.9541118 | -0.3144208 |
| H | -1.0764693 | -4.1308338 | -1.4155229 |
| H | -0.7313269 | -6.5663422 | -1.0296953 |
| H | -2.3940669 | -6.0778713 | -0.5586938 |
| H | -1.1587639 | -6.3760708 | 0.7003545  |
| H | 4.3302584  | 5.0519789  | 0.6573604  |
| H | 5.1713250  | 1.2560152  | -3.8058960 |
| H | -0.4383190 | 6.6851092  | -2.8123649 |
| C | 4.7934481  | 4.2617962  | 0.0246018  |
| H | 3.6603752  | -1.4109367 | -2.8669213 |
| H | 6.2126105  | 3.7245217  | 1.5995996  |
| H | -1.3671285 | 5.7352361  | -0.7044112 |
| C | 3.6762876  | 3.6770698  | -0.8317242 |
| C | 4.2029168  | 0.9591354  | -4.2606394 |
| C | 5.4463881  | 3.2354056  | 0.9632827  |
| H | 5.9561795  | 2.4290046  | 0.3967366  |
| C | 3.8411119  | 2.4787129  | -1.5463864 |

|   |            |            |            |
|---|------------|------------|------------|
| C | 0.4861751  | 6.0944029  | -2.6458298 |
| H | 5.3867130  | 5.7142881  | -1.5225017 |
| C | 2.4619365  | 4.3650376  | -0.9881699 |
| C | 5.8471686  | 4.9454964  | -0.8693623 |
| H | 6.6318170  | 5.4359474  | -0.2562262 |
| H | 2.3210261  | 5.3100300  | -0.4372737 |
| C | 3.5387468  | -0.4831395 | -2.2704511 |
| H | 4.3820343  | 0.0493821  | -4.8707579 |
| H | 3.8881736  | 1.7748920  | -4.9430930 |
| C | 2.8416493  | 1.9652542  | -2.3918015 |
| C | -0.5437641 | 4.9993571  | -0.5998738 |
| C | 1.4262001  | 3.9013831  | -1.8215812 |
| H | 0.9691386  | 5.9260964  | -3.6300808 |
| H | 1.1788356  | 6.7149701  | -2.0397339 |
| C | 3.1372546  | 0.6904743  | -3.1803284 |
| C | 1.6181634  | 2.6799457  | -2.5336985 |
| C | 0.1643482  | 4.7603181  | -1.9444302 |
| H | 2.7716421  | -0.6681699 | -1.4947178 |
| H | -1.0264078 | 4.0653787  | -0.2443171 |
| H | 4.4991020  | -0.2930510 | -1.7487416 |
| H | 4.7008733  | 2.7487255  | 1.6216272  |
| H | 0.1407110  | 5.3933157  | 0.1809580  |
| H | 6.3452252  | 4.2016529  | -1.5264326 |
| H | 2.2108425  | 0.3956678  | -3.7125474 |
| H | -0.5596412 | 4.2192434  | -2.5834294 |
| H | 4.7846994  | 1.9206849  | -1.4475780 |
| C | 2.2212585  | -1.7888775 | 6.7711869  |
| C | 1.9869381  | -1.9544545 | 5.4048796  |
| C | 1.9015246  | -3.2561426 | 4.8575106  |
| C | 2.0640157  | -4.3877503 | 5.6923901  |
| C | 2.3015044  | -4.2164566 | 7.0609297  |
| C | 2.3778735  | -2.9180821 | 7.5986741  |
| H | 2.2725155  | -0.7754557 | 7.1961235  |
| H | 1.8485992  | -1.0908582 | 4.7440176  |
| C | 1.6191134  | -3.4632720 | 3.4395722  |
| H | 1.9955070  | -5.3983856 | 5.2587270  |
| H | 2.4250104  | -5.0925752 | 7.7147541  |
| H | 2.5597682  | -2.7848007 | 8.6763616  |
| O | 1.3976228  | -2.5842710 | 2.5976166  |
| H | 1.5840915  | -4.5331710 | 3.1034848  |
| C | 1.7097444  | 3.4187363  | 4.7815612  |
| C | 1.6270225  | 2.6762027  | 3.6346326  |
| C | 1.0781825  | 1.3726763  | 4.0598664  |
| O | 0.8824949  | 1.3279603  | 5.3864092  |
| C | 1.2081916  | 2.6235049  | 5.9369988  |
| O | 0.7752839  | 0.3826279  | 3.3651613  |
| C | 1.8079593  | 2.9875322  | 2.2148432  |
| H | 1.9470145  | 2.4733709  | 6.7544687  |
| H | 0.2772037  | 3.0362783  | 6.3862769  |
| H | 2.3731427  | 2.2021879  | 1.6725434  |
| H | 2.2863626  | 3.9692445  | 2.0468284  |
| H | 2.0362959  | 4.4638289  | 4.8653628  |

|    |            |            |            |
|----|------------|------------|------------|
| Zn | -0.0854225 | 2.9283598  | 1.5261857  |
| Br | -1.9645226 | 3.4492117  | 2.8243436  |
| C  | -2.1276227 | -1.1230564 | -1.8657594 |
| C  | -1.8893754 | -0.8636759 | -3.2214552 |
| C  | -2.1997609 | -1.9112378 | -4.1688875 |
| C  | -1.8273396 | -1.8485828 | -5.5455414 |
| C  | -2.8897316 | -3.0927251 | -3.7073420 |
| C  | -3.2492374 | -4.1044670 | -4.6475175 |
| C  | -3.1310744 | -3.2673745 | -2.3145233 |
| H  | -3.6084245 | -4.1979450 | -1.9696841 |
| C  | -2.6967713 | -2.3405957 | -1.3751742 |
| C  | 0.5120598  | 2.1401581  | -3.3817751 |
| C  | 0.0173111  | 2.8209581  | -4.4886016 |
| H  | 0.5308463  | 3.7327234  | -4.8311856 |
| C  | -1.1784509 | 2.4184396  | -5.1486311 |
| C  | -1.7255753 | 3.1934182  | -6.2150574 |
| C  | -1.8850612 | 1.2448053  | -4.6937280 |
| C  | -3.1541183 | 0.9558752  | -5.2796567 |
| C  | -1.2999888 | 0.4376468  | -3.6476377 |
| C  | -0.1527850 | 0.9287738  | -3.0118540 |
| O  | -1.8622975 | -0.1468609 | -0.9177081 |
| O  | 0.4077104  | 0.1974506  | -1.9682395 |
| P  | -0.3389037 | 0.2941427  | -0.5075262 |
| O  | 0.3514813  | -0.7586620 | 0.3743171  |
| O  | -0.4588624 | 1.7280244  | -0.0119734 |
| C  | -2.9076280 | -3.9906247 | -5.9862374 |
| C  | -2.1721222 | -2.8606472 | -6.4308202 |
| H  | -3.7875620 | -4.9925337 | -4.2803754 |
| H  | -3.1851243 | -4.7821083 | -6.6989638 |
| H  | -1.2495270 | -0.9862670 | -5.9046380 |
| H  | -1.8658743 | -2.7873386 | -7.4855463 |
| C  | -3.6700678 | 1.7434764  | -6.2993911 |
| C  | -2.9433488 | 2.8611724  | -6.7878563 |
| H  | -3.7329496 | 0.1002474  | -4.9061344 |
| H  | -4.6546128 | 1.5014261  | -6.7278738 |
| H  | -3.3573817 | 3.4724368  | -7.6041703 |
| H  | -1.1669531 | 4.0777585  | -6.5602250 |
| C  | -1.7377508 | -3.6176870 | 0.5573023  |
| C  | -2.6437599 | -2.6221561 | 0.0916958  |
| C  | -1.5811874 | -3.7837101 | 1.9457155  |
| C  | -3.3783152 | -1.8349028 | 1.0222842  |
| C  | -3.1586765 | -2.0261032 | 2.3963671  |
| C  | -2.2494066 | -2.9822550 | 2.8829235  |
| H  | -0.8785786 | -4.5497216 | 2.3123022  |
| C  | -4.4318147 | -0.8265913 | 0.5689627  |
| H  | -3.7125827 | -1.3975039 | 3.1109686  |
| C  | -4.2502705 | 0.5619915  | 1.2028448  |
| H  | -4.3965681 | 0.5433985  | 2.3025034  |
| H  | -4.9918242 | 1.2762480  | 0.7901624  |
| H  | -3.2426133 | 0.9763080  | 1.0099294  |
| C  | -5.8438097 | -1.3877541 | 0.8289570  |
| H  | -4.3310390 | -0.7061547 | -0.5290961 |
| H  | -6.0202200 | -1.5376786 | 1.9149089  |
| H  | -5.9886388 | -2.3666944 | 0.3281264  |
| H  | -6.6205241 | -0.6893757 | 0.4538604  |
| C  | -1.9860924 | -3.1393295 | 4.3752148  |
| C  | -1.6134558 | -1.8023024 | 5.0386039  |
| H  | -1.2864930 | -1.9594551 | 6.0874589  |
| H  | -2.4769688 | -1.1055883 | 5.0611860  |
| H  | -0.7967131 | -1.2894555 | 4.4938934  |
| C  | -3.1702277 | -3.8163298 | 5.0892462  |
| H  | -1.1087540 | -3.8188750 | 4.4747877  |
| H  | -2.9530966 | -3.9682739 | 6.1672310  |
| H  | -3.4031270 | -4.8024720 | 4.6394463  |
| H  | -4.0841344 | -3.1907114 | 5.0142238  |
| C  | -0.8944989 | -4.4827106 | -0.3814375 |
| C  | 0.6159723  | -4.3172359 | -0.1414881 |
| H  | 1.1910087  | -4.8639459 | -0.9170806 |
| H  | 0.9254922  | -4.7235170 | 0.8437658  |
| H  | 0.9080789  | -3.2500942 | -0.1724895 |
| C  | -1.3205884 | -5.9599928 | -0.3109020 |

## TS2

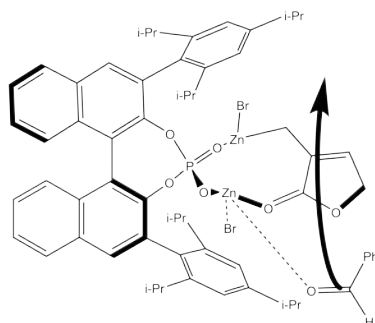

Energy (Hartree) = -11970.01802365  
number of imaginary frequencies: 1

|    |           |            |           |
|----|-----------|------------|-----------|
| Zn | 1.6340636 | -0.6848757 | 1.8275935 |
| Br | 3.9309330 | -0.3474501 | 1.7902684 |

|   |            |            |            |
|---|------------|------------|------------|
| H | -1.0822091 | -4.1393817 | -1.4168527 |
| H | -0.7369339 | -6.5744371 | -1.0275474 |
| H | -2.3968554 | -6.0839511 | -0.5487684 |
| H | -1.1566036 | -6.3807256 | 0.7037344  |
| H | 4.3283417  | 5.0411100  | 0.6671858  |
| H | 5.1768496  | 1.2557267  | -3.8024730 |
| H | -0.4341456 | 6.6842091  | -2.8117817 |
| C | 4.7931742  | 4.2540534  | 0.0310422  |
| H | 3.6632380  | -1.4136174 | -2.8675780 |
| H | 6.2121567  | 3.7135562  | 1.6053622  |
| H | -1.3690236 | 5.7273129  | -0.7067270 |
| C | 3.6769325  | 3.6714099  | -0.8279334 |
| C | 4.2094434  | 0.9585153  | -4.2588299 |
| C | 5.4479771  | 3.2254472  | 0.9659214  |
| H | 5.9615974  | 2.4233773  | 0.3969600  |
| C | 3.8421884  | 2.4741738  | -1.5436524 |
| C | 0.4897679  | 6.0929324  | -2.6439512 |
| H | 5.3827238  | 5.7138411  | -1.5106317 |
| C | 2.4637320  | 4.3603418  | -0.9868562 |
| C | 5.8449100  | 4.9436783  | -0.8605986 |
| H | 6.6299878  | 5.4324949  | -0.2467726 |
| H | 2.3223018  | 5.3050700  | -0.4354009 |
| C | 3.5415305  | -0.4859833 | -2.2711405 |
| H | 4.3906712  | 0.0495318  | -4.8693392 |
| H | 3.8961198  | 1.7748347  | -4.9409554 |
| C | 2.8448663  | 1.9626914  | -2.3923265 |
| C | -0.5447937 | 4.9924131  | -0.6027013 |
| C | 1.4295643  | 3.8987976  | -1.8229043 |
| H | 0.9759356  | 5.9272804  | -3.6269397 |
| H | 1.1810994  | 6.7131360  | -2.0360535 |
| C | 3.1419005  | 0.6883773  | -3.1809265 |
| C | 1.6223114  | 2.6782664  | -2.5360863 |
| C | 0.1673576  | 4.7573650  | -1.9458572 |
| H | 2.7734130  | -0.6718301 | -1.4968369 |
| H | -1.0266665 | 4.0575437  | -0.2489192 |
| H | 4.5009722  | -0.2984207 | -1.7470545 |
| H | 4.7047882  | 2.7321174  | 1.6217246  |
| H | 0.1366333  | 5.3861808  | 0.1809416  |
| H | 6.3428283  | 4.2035652  | -1.5215944 |
| H | 2.2164796  | 0.3943219  | -3.7152968 |
| H | -0.5545961 | 4.2169783  | -2.5878099 |
| H | 4.7842001  | 1.9141975  | -1.4420373 |
| C | 2.2417093  | -1.7788024 | 6.7518508  |
| C | 2.0081423  | -1.9519510 | 5.3862604  |
| C | 1.9113929  | -3.2562708 | 4.8489532  |
| C | 2.0640367  | -4.3820852 | 5.6923911  |
| C | 2.3015446  | -4.2035153 | 7.0596457  |
| C | 2.3876630  | -2.9021471 | 7.5878145  |
| H | 2.2989913  | -0.7621758 | 7.1679886  |
| H | 1.8802065  | -1.0924357 | 4.7180168  |
| C | 1.6227122  | -3.4691386 | 3.4315658  |
| H | 1.9869595  | -5.3953950 | 5.2659851  |
| H | 2.4173998  | -5.0758452 | 7.7199257  |
| H | 2.5687179  | -2.7626277 | 8.6649201  |
| O | 1.4051389  | -2.5954997 | 2.5864137  |
| H | 1.5805917  | -4.5419178 | 3.1013524  |
| C | 1.6460670  | 3.4276341  | 4.7729783  |
| C | 1.6083514  | 2.6744637  | 3.6304041  |
| C | 1.0629287  | 1.3667743  | 4.0514237  |
| O | 0.8312091  | 1.3305905  | 5.3742627  |
| C | 1.1174184  | 2.6359118  | 5.9193573  |
| O | 0.7899524  | 0.3684967  | 3.3593172  |
| C | 1.8137757  | 2.9788697  | 2.2152321  |
| H | 1.8272642  | 2.5068553  | 6.7664405  |
| H | 0.1618058  | 3.0377241  | 6.3261655  |
| H | 2.3761771  | 2.1868226  | 1.6803995  |
| H | 2.2965084  | 3.9580945  | 2.0468948  |
| H | 1.9543052  | 4.4781076  | 4.8550099  |

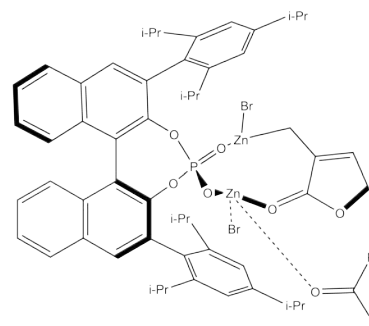

Energy (Hartree) = -11970.0437438799

|    |            |            |            |
|----|------------|------------|------------|
| Zn | 0.8176813  | -1.8180155 | 1.9086314  |
| Br | 0.1126555  | -1.9718211 | 4.1285971  |
| Zn | -3.0360270 | -0.6753512 | 0.7551751  |
| Br | -4.2158548 | 0.8367198  | -0.5739145 |
| C  | 0.1961458  | 1.1859418  | -2.0938532 |
| C  | -0.0514191 | 2.5632718  | -2.1278187 |
| C  | 0.6048186  | 3.3429111  | -3.1505597 |
| C  | 0.5605832  | 4.7700247  | -3.1829715 |
| C  | 1.3671028  | 2.6629220  | -4.1705936 |
| C  | 1.9913559  | 3.4260306  | -5.2031123 |
| C  | 1.5121267  | 1.2478152  | -4.1117417 |
| H  | 2.0889871  | 0.7386897  | -4.8990090 |
| C  | 0.9788603  | 0.4983924  | -3.0696360 |
| C  | -1.3785797 | 3.6577677  | 1.3052013  |
| C  | -2.3968106 | 4.5285940  | 0.9363849  |
| H  | -2.9411717 | 5.0808976  | 1.7168299  |
| C  | -2.7893815 | 4.6980452  | -0.4224699 |
| C  | -3.9063636 | 5.5155449  | -0.7696325 |
| C  | -2.0706643 | 4.0091950  | -1.4666811 |
| C  | -2.5447473 | 4.1257843  | -2.8068580 |
| C  | -0.9332506 | 3.1985339  | -1.1090399 |
| C  | -0.6726195 | 3.0053038  | 0.2488789  |
| O  | -0.3919207 | 0.4015870  | -1.1124145 |
| O  | 0.3618128  | 2.1362254  | 0.6143511  |
| P  | 0.0034858  | 0.5455234  | 0.4788387  |
| O  | 1.2903689  | -0.2182290 | 0.8482642  |
| O  | -1.2406766 | 0.1126761  | 1.2533052  |
| C  | 1.9035758  | 4.8098625  | -5.2201072 |
| C  | 1.1939150  | 5.4845465  | -4.1906656 |
| H  | 2.5593532  | 2.8909181  | -5.9804756 |
| H  | 2.3947026  | 5.3870583  | -6.0183692 |
| H  | 0.0233835  | 5.3072902  | -2.3893674 |
| H  | 1.1494795  | 6.5844238  | -4.1877108 |
| C  | -3.6472391 | 4.9131709  | -3.1091762 |
| C  | -4.3273189 | 5.6269121  | -2.0863747 |
| H  | -2.0351027 | 3.5679708  | -3.6048242 |
| H  | -4.0017122 | 4.9781565  | -4.1493216 |
| H  | -5.1969594 | 6.2527163  | -2.3388493 |
| H  | -4.4415456 | 6.0426981  | 0.0358539  |
| C  | 2.5027356  | -1.4535462 | -2.5844325 |
| C  | 1.2202376  | -0.9765193 | -2.9730164 |
| C  | 2.7449506  | -2.8387120 | -2.6236192 |
| C  | 0.1914537  | -1.8956992 | -3.3095309 |
| C  | 0.4875484  | -3.2718634 | -3.3343724 |
| C  | 1.7650959  | -3.7657659 | -3.0219559 |
| H  | 3.7453055  | -3.2134486 | -2.3483633 |
| C  | -1.2212401 | -1.4304958 | -3.6569181 |
| H  | -0.3089522 | -3.9763737 | -3.6172440 |
| C  | -2.2514062 | -1.9699347 | -2.6502806 |
| H  | -2.3387440 | -3.0749207 | -2.7092489 |
| H  | -3.2547820 | -1.5356430 | -2.8323270 |
| H  | -1.9586036 | -1.6986162 | -1.6168509 |
| C  | -1.6035501 | -1.7858581 | -5.1044820 |
| H  | -1.2442904 | -0.3250615 | -3.5779365 |
| H  | -1.6226032 | -2.8846594 | -5.2629262 |

int1; COSMO



|   |            |            |            |
|---|------------|------------|------------|
| H | -0.8807739 | -1.3546826 | -5.8266307 |
| H | -2.6119477 | -1.3941383 | -5.3511676 |
| C | 2.1408049  | -5.2355792 | -3.1820651 |
| C | 0.9872512  | -6.2147009 | -2.9285713 |
| H | 1.3539099  | -7.2614256 | -2.9568067 |
| H | 0.2009175  | -6.1267839 | -3.7074710 |
| H | 0.5170177  | -6.0321972 | -1.9439896 |
| C | 2.7677189  | -5.4680430 | -4.5720167 |
| H | 2.9330301  | -5.4434919 | -2.4269027 |
| H | 3.1080979  | -6.5184801 | -4.6869026 |
| H | 3.6373604  | -4.8014746 | -4.7401758 |
| H | 2.0258427  | -5.2585617 | -5.3711142 |
| C | 3.6195378  | -0.5060640 | -2.1467841 |
| C | 4.2553349  | -0.9238973 | -0.8102221 |
| H | 4.9936499  | -0.1625718 | -0.4840077 |
| H | 4.7990281  | -1.8889156 | -0.8945747 |
| H | 3.4875407  | -1.0235179 | -0.0205479 |
| C | 4.6868576  | -0.3572452 | -3.2473081 |
| H | 3.1611815  | 0.4916691  | -1.9870378 |
| H | 5.4760070  | 0.3586388  | -2.9367377 |
| H | 4.2489394  | 0.0091178  | -4.1973922 |
| H | 5.1770156  | -1.3311817 | -3.4586501 |
| H | -0.7088791 | 1.8738983  | 7.2848287  |
| H | 1.7995227  | 6.0561561  | 3.9791707  |
| H | -5.3573830 | 2.6364062  | 3.0600272  |
| C | 0.1787853  | 2.3361209  | 6.7990433  |
| H | 3.2449587  | 4.5176154  | 1.5712055  |
| H | 1.5488921  | 0.8958160  | 7.7382462  |
| H | -4.3551530 | 0.2324955  | 2.9172806  |
| C | -0.2533553 | 2.7514193  | 5.3988076  |
| C | 1.3667600  | 6.0663417  | 2.9567703  |
| C | 1.2788396  | 1.2593417  | 6.7246079  |
| H | 2.1990038  | 1.6678125  | 6.2556320  |
| C | 0.5930659  | 3.4980922  | 4.5610478  |
| C | -4.4012812 | 3.0105763  | 3.4817813  |
| H | -0.1835360 | 4.2961514  | 7.7305006  |
| C | -1.4904294 | 2.3392458  | 4.8789072  |
| C | 0.6149360  | 3.5293492  | 7.6653824  |
| H | 0.8600847  | 3.1982943  | 8.6958254  |
| H | -2.1560999 | 1.7434339  | 5.5232829  |
| C | 2.5837435  | 3.9416566  | 2.2515873  |
| H | 2.0367172  | 6.6746729  | 2.3139802  |
| H | 0.3850158  | 6.5793012  | 3.0133554  |
| C | 0.2430326  | 3.8180471  | 3.2376013  |
| C | -3.5020521 | 0.6516505  | 3.4950286  |
| C | -1.8902862 | 2.6274680  | 3.5606565  |
| H | -4.2637161 | 4.0534036  | 3.1346551  |
| H | -4.4992925 | 3.0369851  | 4.5878154  |
| C | 1.2191714  | 4.6393838  | 2.3966806  |
| C | -1.0117111 | 3.3788578  | 2.7298046  |
| C | -3.2324624 | 2.1024203  | 3.0570873  |
| H | 2.4620815  | 2.9222550  | 1.8362211  |
| H | -2.6067769 | 0.0147033  | 3.3515904  |
| H | 3.1048816  | 3.8578456  | 3.2282714  |
| H | 0.9516363  | 0.3917221  | 6.1160236  |
| H | -3.7880742 | 0.5789989  | 4.5652016  |
| H | 1.5211158  | 4.0210655  | 7.2535201  |
| H | 0.7913966  | 4.7379806  | 1.3781875  |
| H | -3.1939511 | 2.1039040  | 1.9482685  |
| H | 1.5701419  | 3.8328749  | 4.9449049  |
| C | 0.0221473  | -6.3905882 | 2.3447725  |
| C | 0.8358743  | -5.2626381 | 2.2149023  |
| C | 1.8865339  | -5.2600633 | 1.2642474  |
| C | 2.1348449  | -6.4152766 | 0.4868722  |
| C | 1.3098978  | -7.5391243 | 0.6138653  |
| C | 0.2497313  | -7.5229535 | 1.5369183  |
| H | -0.7952620 | -6.3922036 | 3.0814077  |
| H | 0.6650265  | -4.3820646 | 2.8552311  |
| C | 2.7199398  | -4.0802079 | 1.0329810  |
| H | 2.9660724  | -6.4145303 | -0.2356588 |
| H | 1.4903837  | -8.4289695 | -0.0072153 |

|   |            |            |            |
|---|------------|------------|------------|
| H | -0.3990204 | -8.4067292 | 1.6399111  |
| O | 2.5078756  | -2.9329593 | 1.4526551  |
| H | 3.6350811  | -4.2434242 | 0.4073976  |
| C | -3.2129012 | -4.6146823 | 0.0867415  |
| C | -2.5787483 | -3.5691738 | 0.7007321  |
| C | -1.1714635 | -3.6402604 | 0.2405547  |
| O | -0.9909785 | -4.6866570 | -0.5884802 |
| C | -2.2467464 | -5.3672273 | -0.7615997 |
| O | -0.2134545 | -2.9003532 | 0.5010097  |
| C | -3.0518628 | -2.5063815 | 1.5939191  |
| H | -2.1041595 | -6.4276345 | -0.4549859 |
| H | -2.4913517 | -5.3607690 | -1.8478393 |
| H | -2.3460322 | -2.3694851 | 2.4419294  |
| H | -4.0635054 | -2.7267605 | 1.9860440  |
| H | -4.2736736 | -4.8842395 | 0.1786756  |

### int1

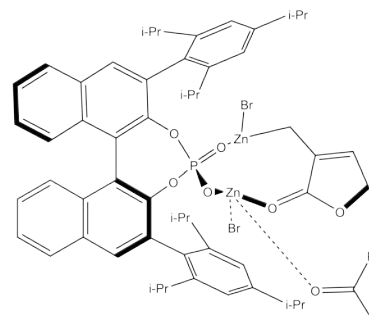

Energy (Hartree) = -11970.03006307

|    |            |            |            |
|----|------------|------------|------------|
| Zn | 0.7725342  | -1.7865785 | 1.9262389  |
| Br | 0.1212289  | -1.9883856 | 4.1496169  |
| Zn | -3.0322978 | -0.6687463 | 0.7546041  |
| Br | -4.2044485 | 0.8287145  | -0.5774991 |
| C  | 0.2035683  | 1.1854876  | -2.0967594 |
| C  | -0.0452754 | 2.5623517  | -2.1301517 |
| C  | 0.6116434  | 3.3425284  | -3.1519917 |
| C  | 0.5653038  | 4.7692444  | -3.1843070 |
| C  | 1.3759788  | 2.6637936  | -4.1710968 |
| C  | 2.0001866  | 3.4281645  | -5.2019863 |
| C  | 1.5217838  | 1.2490662  | -4.1125299 |
| H  | 2.0996514  | 0.7393519  | -4.8986793 |
| C  | 0.9875433  | 0.4987901  | -3.0718161 |
| C  | -1.3792478 | 3.6510398  | 1.3022078  |
| C  | -2.3963114 | 4.5222196  | 0.9316504  |
| H  | -2.9416837 | 5.0723858  | 1.7127869  |
| C  | -2.7864421 | 4.6940539  | -0.4272196 |
| C  | -3.9022324 | 5.5117185  | -0.7757729 |
| C  | -2.0658543 | 4.0068046  | -1.4709565 |
| C  | -2.5369981 | 4.1257270  | -2.8116968 |
| C  | -0.9292210 | 3.1955711  | -1.1120689 |
| C  | -0.6718529 | 3.0001369  | 0.2461267  |
| O  | -0.3841602 | 0.3996377  | -1.1160575 |
| O  | 0.3634177  | 2.1320926  | 0.6136465  |
| P  | 0.0186041  | 0.5408673  | 0.4730534  |
| O  | 1.3077764  | -0.2210298 | 0.8396616  |
| O  | -1.2150996 | 0.0805518  | 1.2524523  |
| C  | 1.9103499  | 4.8112688  | -5.2190801 |
| C  | 1.1984167  | 5.4843661  | -4.1910288 |
| H  | 2.5703395  | 2.8940047  | -5.9784027 |
| H  | 2.4017888  | 5.3891063  | -6.0166067 |
| H  | 0.0252808  | 5.3043923  | -2.3913672 |
| H  | 1.1517716  | 6.5840787  | -4.1881513 |
| C  | -3.6379724 | 4.9141357  | -3.1147379 |
| C  | -4.3199557 | 5.6257843  | -2.0926652 |
| H  | -2.0259003 | 3.5683052  | -3.6088057 |

|   |            |            |            |   |            |            |            |
|---|------------|------------|------------|---|------------|------------|------------|
| H | -3.9904186 | 4.9803127  | -4.1553873 | H | -2.6218028 | 0.0101544  | 3.3412124  |
| H | -5.1894724 | 6.2514053  | -2.3456132 | H | 3.1041214  | 3.8534419  | 3.2378724  |
| H | -4.4399481 | 6.0360327  | 0.0297523  | H | 0.9587782  | 0.3782515  | 6.1119983  |
| C | 2.5087431  | -1.4576126 | -2.5944353 | H | -3.8028400 | 0.5739169  | 4.5521363  |
| C | 1.2261913  | -0.9765388 | -2.9770179 | H | 1.4944682  | 4.0114637  | 7.2594037  |
| C | 2.7463920  | -2.8434445 | -2.6369626 | H | 0.7942354  | 4.7242366  | 1.3788697  |
| C | 0.1929543  | -1.8922102 | -3.3094352 | H | -3.2038881 | 2.1055326  | 1.9406234  |
| C | 0.4848449  | -3.2688645 | -3.3371406 | H | 1.5650307  | 3.8115818  | 4.9446596  |
| C | 1.7621693  | -3.7668750 | -3.0315015 | C | 0.0676824  | -6.3788133 | 2.3913155  |
| H | 3.7479324  | -3.2206434 | -2.3688300 | C | 0.8673913  | -5.2422322 | 2.2471882  |
| C | -1.2201508 | -1.4229899 | -3.6492626 | C | 1.8971929  | -5.2284969 | 1.2750186  |
| H | -0.3151507 | -3.9701098 | -3.6184973 | C | 2.1389337  | -6.3785773 | 0.4897391  |
| C | -2.2478117 | -1.9657579 | -2.6421253 | C | 1.3289292  | -7.5113036 | 0.6322226  |
| H | -2.3438434 | -3.0696673 | -2.7127497 | C | 0.2894071  | -7.5077263 | 1.5781665  |
| H | -3.2487575 | -1.5207910 | -2.8101589 | H | -0.7343076 | -6.3870629 | 3.1447139  |
| H | -1.9459806 | -1.7077123 | -1.6079944 | H | 0.6994181  | -4.3624234 | 2.8903027  |
| C | -1.6071579 | -1.7686358 | -5.0976840 | C | 2.7132897  | -4.0354306 | 1.0313453  |
| H | -1.2419716 | -0.3182402 | -3.5635144 | H | 2.9515959  | -6.3563405 | -0.2536617 |
| H | -1.6268554 | -2.8662478 | -5.2642488 | H | 1.5045594  | -8.3974628 | 0.0044030  |
| H | -0.8864802 | -1.3334340 | -5.8191922 | H | -0.3470290 | -8.3990005 | 1.6941499  |
| H | -2.6160841 | -1.3751405 | -5.3387426 | O | 2.4956679  | -2.8964936 | 1.4607612  |
| C | 2.1317448  | -5.2374856 | -3.1982994 | H | 3.6165111  | -4.1864795 | 0.3830567  |
| C | 0.9798301  | -6.2132719 | -2.9239479 | C | -3.2282538 | -4.6003065 | 0.0924489  |
| H | 1.3418486  | -7.2616543 | -2.9555290 | C | -2.5849571 | -3.5632966 | 0.7126053  |
| H | 0.1832652  | -6.1257831 | -3.6923552 | C | -1.1769456 | -3.6471646 | 0.2529544  |
| H | 0.5227775  | -6.0258011 | -1.9339649 | O | -1.0059363 | -4.6952122 | -0.5792128 |
| C | 2.7339247  | -5.4722338 | -4.5984401 | C | -2.2682395 | -5.3586346 | -0.7591682 |
| H | 2.9364545  | -5.4475433 | -2.4563976 | O | -0.2109172 | -2.9211816 | 0.5154464  |
| H | 3.0692583  | -6.5234540 | -4.7208604 | C | -3.0448957 | -2.4993919 | 1.6066062  |
| H | 3.6014930  | -4.8073477 | -4.7816502 | H | -2.1366408 | -6.4233174 | -0.4607181 |
| H | 1.9793849  | -5.2591096 | -5.3842738 | H | -2.5082043 | -5.3404252 | -1.8468961 |
| C | 3.6302673  | -0.5146522 | -2.1592928 | H | -2.3321395 | -2.3609051 | 2.4484184  |
| C | 4.2635852  | -0.9311430 | -0.8211245 | H | -4.0550635 | -2.7117682 | 2.0065193  |
| H | 5.0078574  | -0.1743360 | -0.4986471 | H | -4.2922880 | -4.8567418 | 0.1823418  |
| H | 4.8020415  | -1.8996990 | -0.9018812 |   |            |            |            |
| H | 3.4971959  | -1.0198831 | -0.0287293 |   |            |            |            |
| C | 4.6978140  | -0.3741950 | -3.2604685 |   |            |            |            |
| H | 3.1768982  | 0.4857171  | -2.0025499 |   |            |            |            |
| H | 5.4902261  | 0.3389562  | -2.9525055 |   |            |            |            |
| H | 4.2617136  | -0.0087023 | -4.2115688 |   |            |            |            |
| H | 5.1840053  | -1.3504260 | -3.4700343 |   |            |            |            |
| H | -0.7181611 | 1.8467571  | 7.2750849  |   |            |            |            |
| H | 1.7840144  | 6.0466325  | 3.9843624  |   |            |            |            |
| H | -5.3636000 | 2.6427123  | 3.0513962  |   |            |            |            |
| C | 0.1685150  | 2.3165192  | 6.7944689  |   |            |            |            |
| H | 3.2467623  | 4.5096334  | 1.5802835  |   |            |            |            |
| H | 1.5462777  | 0.8853391  | 7.7362220  |   |            |            |            |
| H | -4.3693810 | 0.2358870  | 2.9023389  |   |            |            |            |
| C | -0.2612709 | 2.7341778  | 5.3943590  |   |            |            |            |
| C | 1.3580606  | 6.0547977  | 2.9592040  |   |            |            |            |
| C | 1.2763481  | 1.2479553  | 6.7222602  |   |            |            |            |
| H | 2.1950775  | 1.6630346  | 6.2566602  |   |            |            |            |
| C | 0.5874714  | 3.4803693  | 4.5591546  |   |            |            |            |
| C | -4.4070493 | 3.0109792  | 3.4768304  |   |            |            |            |
| H | -0.2136543 | 4.2716240  | 7.7283712  |   |            |            |            |
| C | -1.4988104 | 2.3272509  | 4.8726523  |   |            |            |            |
| C | 0.5906966  | 3.5110582  | 7.6658676  |   |            |            |            |
| H | 0.8343855  | 3.1803687  | 8.6967494  |   |            |            |            |
| H | -2.1666648 | 1.7320347  | 5.5151837  |   |            |            |            |
| C | 2.5850166  | 3.9335037  | 2.2598934  |   |            |            |            |
| H | 2.0301086  | 6.6653779  | 2.3207693  |   |            |            |            |
| H | 0.3745721  | 6.5645387  | 3.0104723  |   |            |            |            |
| C | 0.2399211  | 3.8046035  | 3.2366412  |   |            |            |            |
| C | -3.5154999 | 0.6499176  | 3.4825742  |   |            |            |            |
| C | -1.8970273 | 2.6198659  | 3.5552168  |   |            |            |            |
| H | -4.2652233 | 4.0547716  | 3.1348094  |   |            |            |            |
| H | -4.5058369 | 3.0341389  | 4.5827626  |   |            |            |            |
| C | 1.2179770  | 4.6271368  | 2.3992253  |   |            |            |            |
| C | -1.0153403 | 3.3698437  | 2.7268720  |   |            |            |            |
| C | -3.2407700 | 2.1010735  | 3.0496137  |   |            |            |            |
| H | 2.4693754  | 2.9123845  | 1.8474688  |   |            |            |            |

### 7.8.3 Pathway 14j-ma ↔ 14d-mi TS1; COSMO

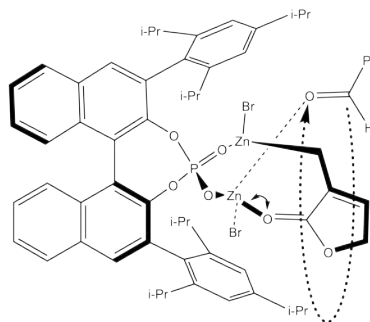

Energy (Hartree) = -11970.01411537

|    |            |            |            |
|----|------------|------------|------------|
| Zn | 1.5124422  | -2.3240965 | 0.4997260  |
| Br | 3.3546501  | -2.5446226 | 1.8370236  |
| Zn | -3.3800182 | 0.7616259  | -0.0830441 |
| Br | -3.3758428 | 3.0482898  | -0.5474694 |
| C  | 0.3818214  | 1.5928429  | -2.5633910 |
| C  | 0.7932018  | 2.8642682  | -2.1512788 |
| C  | 1.7619455  | 3.5525260  | -2.9759738 |
| C  | 2.3820554  | 4.7788448  | -2.5876119 |
| C  | 2.1567732  | 2.9634311  | -4.2348468 |
| C  | 3.0767583  | 3.6600265  | -5.0754276 |
| C  | 1.6844750  | 1.6661156  | -4.5870360 |
| H  | 2.0397813  | 1.2052679  | -5.5218628 |
| C  | 0.8530194  | 0.9394243  | -3.7443666 |
| C  | 0.1574017  | 3.1738288  | 1.6221514  |
| C  | -0.2726084 | 4.4896163  | 1.7258873  |

|   |            |            |            |   |            |            |            |
|---|------------|------------|------------|---|------------|------------|------------|
| H | -0.4525845 | 4.9249237  | 2.7204156  | C | 2.2567001  | -1.5737862 | 5.7417916  |
| C | -0.5212141 | 5.2870789  | 0.5711204  | H | 3.2363879  | -1.0527573 | 5.7519014  |
| C | -1.0682413 | 6.5995862  | 0.6888288  | C | 1.9284740  | 0.9930407  | 4.1873560  |
| C | -0.2483845 | 4.7541044  | -0.7418400 | C | -2.7013692 | 3.1309508  | 4.0312833  |
| C | -0.5990248 | 5.5411208  | -1.8782600 | H | 0.4426994  | 0.8127933  | 7.5641502  |
| C | 0.3160204  | 3.4319009  | -0.8580192 | C | -0.4463521 | 0.7419362  | 4.4962083  |
| C | 0.4220846  | 2.6732367  | 0.3115541  | C | 1.3015107  | 0.1488124  | 7.3392906  |
| O | -0.5689714 | 0.9032943  | -1.8155624 | H | 1.4225678  | -0.5604168 | 8.1847523  |
| O | 0.8653194  | 1.3516803  | 0.2323158  | H | -1.2912958 | 0.2681902  | 5.0219624  |
| P | -0.1887660 | 0.2442709  | -0.3713430 | C | 3.8174338  | 1.4533662  | 1.7896231  |
| O | 0.6750340  | -1.0182117 | -0.5605253 | H | 4.5910897  | 3.8963307  | 2.8849489  |
| O | -1.4927980 | 0.1004866  | 0.4033400  | H | 3.1086942  | 4.2165345  | 3.8471806  |
| C | 3.6275445  | 4.8709147  | -4.6837829 | C | 1.7196587  | 1.9194414  | 3.1499115  |
| C | 3.2892027  | 5.4217631  | -3.4193163 | C | -3.0965305 | 0.8084624  | 3.1194217  |
| H | 3.3557029  | 3.2031337  | -6.0380814 | C | -0.7114084 | 1.6704057  | 3.4715974  |
| H | 4.3398638  | 5.3944736  | -5.3395702 | H | -2.0664908 | 4.0381788  | 4.0064627  |
| H | 2.1402850  | 5.2155032  | -1.6094094 | H | -2.7483273 | 2.7843458  | 5.0855403  |
| H | 3.7533616  | 6.3643764  | -3.0910425 | C | 2.9335954  | 2.5269989  | 2.4486910  |
| C | -1.1505840 | 6.8061116  | -1.7303647 | C | 0.3879134  | 2.2638390  | 2.7899007  |
| C | -1.3742651 | 7.3493188  | -0.4371182 | C | -2.1528347 | 2.0220726  | 3.1137637  |
| H | -0.4468620 | 5.1239560  | -2.8834255 | H | 3.2279544  | 0.8293491  | 1.0904777  |
| H | -1.4261197 | 7.3881153  | -2.6231314 | H | -2.6671291 | -0.0430526 | 2.5563277  |
| H | -1.8076884 | 8.3556239  | -0.3316211 | H | 4.2721202  | 0.7747438  | 2.5406053  |
| H | -1.2640379 | 6.9980969  | 1.6967748  | H | 2.1676983  | -2.0683322 | 4.7534506  |
| C | 1.5877039  | -1.4645007 | -3.7329651 | H | -3.3250280 | 0.4546834  | 4.1468914  |
| C | 0.5484171  | -0.5120520 | -3.9345832 | H | 2.2120327  | 0.7824543  | 7.2920760  |
| C | 1.2612399  | -2.8334937 | -3.7779290 | H | 2.5609667  | 3.1880811  | 1.6401668  |
| C | -0.7815132 | -0.9503046 | -4.1842566 | H | -2.1456193 | 2.4225811  | 2.0783299  |
| C | -1.0498377 | -2.3282251 | -4.2196630 | H | 2.9626311  | 0.7295973  | 4.4570988  |
| C | -0.0461228 | -3.2895873 | -4.0060713 | C | -0.1541871 | -4.2384055 | 4.6037697  |
| H | 2.0557962  | -3.5803136 | -3.6121874 | C | 0.0787181  | -4.0542401 | 3.2379253  |
| C | -1.9163120 | 0.0413757  | -4.4288128 | C | -0.4405860 | -4.9820043 | 2.3040536  |
| H | -2.0840984 | -2.6615611 | -4.3963210 | C | -1.1906739 | -6.0926215 | 2.7598763  |
| C | -3.1367808 | -0.2320497 | -3.5344465 | C | -1.4214448 | -6.2729200 | 4.1281244  |
| H | -3.6820934 | -1.1485479 | -3.8416740 | C | -0.9042093 | -5.3444365 | 5.0489857  |
| H | -3.8502800 | 0.6161929  | -3.5735942 | H | 0.2525794  | -3.5191393 | 5.3287101  |
| H | -2.8275767 | -0.3886155 | -2.4831024 | H | 0.6728498  | -3.1931620 | 2.8970983  |
| C | -2.3007172 | 0.0749056  | -5.9198326 | C | -0.2748822 | -4.8292969 | 0.8610110  |
| H | -1.5423060 | 1.0523220  | -4.1697180 | H | -1.5999328 | -6.8047375 | 2.0260603  |
| H | -2.6742132 | -0.9148437 | -6.2574266 | H | -2.0065988 | -7.1349851 | 4.4810812  |
| H | -1.4300616 | 0.3399503  | -6.5538583 | H | -1.0859499 | -5.4814068 | 6.1259694  |
| H | -3.1014885 | 0.8210128  | -6.1045003 | O | 0.3539218  | -3.9380834 | 0.2646006  |
| C | -0.3630519 | -4.7792041 | -4.0001335 | H | -0.7603583 | -5.6130285 | 0.2310563  |
| C | -1.4197011 | -5.1255689 | -2.9367214 | C | -4.3732606 | -2.3234845 | 1.9832897  |
| H | -1.5402271 | -6.2253836 | -2.8435388 | C | -4.1983120 | -1.8506276 | 0.7178383  |
| H | -2.4100086 | -4.6976460 | -3.1946265 | C | -3.1596817 | -2.7087566 | 0.0751043  |
| H | -1.1461135 | -4.6974941 | -1.9532150 | O | -2.7723319 | -3.6854026 | 0.9811586  |
| C | -0.7788600 | -5.2776178 | -5.3959216 | C | -3.4698130 | -3.4909250 | 2.2194858  |
| H | 0.5785583  | -5.3039597 | -3.7234682 | O | -2.6769067 | -2.6487221 | -1.0371042 |
| H | -0.9630905 | -6.3722905 | -5.3888899 | C | -4.7539447 | -0.6983258 | 0.0018668  |
| H | 0.0042071  | -5.0641383 | -6.1514999 | H | -2.7196280 | -3.3115083 | 3.0249976  |
| H | -1.7141623 | -4.7824512 | -5.7319269 | H | -4.0092447 | -4.4303784 | 2.4781335  |
| C | 3.0406669  | -1.0684739 | -3.4610681 | H | -5.6717290 | -0.3000020 | 0.4764800  |
| C | 3.5913880  | -1.6651303 | -2.1545442 | H | -4.9603527 | -0.9467271 | -1.0600050 |
| H | 4.6464481  | -1.3631149 | -1.9934953 | H | -5.0537878 | -1.9257745 | 2.7487163  |
| H | 3.5616023  | -2.7747481 | -2.1470828 |   |            |            |            |
| H | 3.0134910  | -1.2878985 | -1.2876139 |   |            |            |            |
| C | 3.9375398  | -1.4270416 | -4.6611000 |   |            |            |            |
| H | 3.0778195  | 0.0321103  | -3.3420140 |   |            |            |            |
| H | 4.9806811  | -1.0881698 | -4.4913852 |   |            |            |            |
| H | 3.5690301  | -0.9527262 | -5.5934593 |   |            |            |            |
| H | 3.9613371  | -2.5235765 | -4.8337759 |   |            |            |            |
| H | 0.1627968  | -1.2002892 | 6.1056227  |   |            |            |            |
| H | 4.1605136  | 2.8244758  | 4.2539080  |   |            |            |            |
| H | -3.7247232 | 3.4244563  | 3.7178268  |   |            |            |            |
| C | 1.0967816  | -0.6008416 | 6.0083306  |   |            |            |            |
| H | 4.6445749  | 1.9260403  | 1.2203712  |   |            |            |            |
| H | 2.3013999  | -2.3567133 | 6.5268906  |   |            |            |            |
| H | -4.0692033 | 1.0815995  | 2.6563391  |   |            |            |            |
| C | 0.8617294  | 0.3836586  | 4.8686257  |   |            |            |            |
| C | 3.7412797  | 3.4158069  | 3.4127643  |   |            |            |            |

### TS1

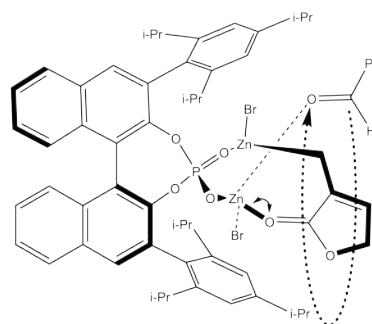

Energy (Hartree) = -11970.00155227  
number of imaginary frequencies: 1

|    |            |            |            |   |            |            |            |
|----|------------|------------|------------|---|------------|------------|------------|
| Zn | 1.5210956  | -2.3099902 | 0.5082119  | H | 3.0156853  | -1.2935600 | -1.2853314 |
| Br | 3.3542723  | -2.5567698 | 1.8472798  | C | 3.9347697  | -1.4363458 | -4.6596786 |
| Zn | -3.3785653 | 0.7633894  | -0.0890877 | H | 3.0787255  | 0.0248418  | -3.3402335 |
| Br | -3.3782372 | 3.0451587  | -0.5391413 | H | 4.9788174  | -1.0993328 | -4.4919888 |
| C  | 0.3829957  | 1.5925924  | -2.5594364 | H | 3.5655892  | -0.9626112 | -5.5918505 |
| C  | 0.7933202  | 2.8654875  | -2.1506961 | H | 3.9564835  | -2.5327159 | -4.8329247 |
| C  | 1.7611506  | 3.5522244  | -2.9776402 | H | 0.1421465  | -1.1914280 | 6.1034513  |
| C  | 2.3796178  | 4.7802242  | -2.5930725 | H | 4.1563067  | 2.8200003  | 4.2604060  |
| C  | 2.1561454  | 2.9602757  | -4.2348797 | H | -3.7240442 | 3.4515219  | 3.7138601  |
| C  | 3.0746982  | 3.6558514  | -5.0769762 | C | 1.0785992  | -0.5948757 | 6.0075515  |
| C  | 1.6846566  | 1.6619558  | -4.5831578 | H | 4.6401702  | 1.9226221  | 1.2251243  |
| H  | 2.0395671  | 1.1981939  | -5.5167024 | H | 2.2784223  | -2.3553608 | 6.5267865  |
| C  | 0.8540685  | 0.9364297  | -3.7389750 | H | -4.0782522 | 1.1122870  | 2.6526899  |
| C  | 0.1572407  | 3.1840433  | 1.6218944  | C | 0.8482060  | 0.3909123  | 4.8678216  |
| C  | -0.2708659 | 4.5004294  | 1.7223355  | C | 3.7400348  | 3.4133327  | 3.4193005  |
| H  | -0.4503195 | 4.9373073  | 2.7162071  | C | 2.2350248  | -1.5721807 | 5.7414649  |
| C  | -0.5191158 | 5.2955862  | 0.5662537  | H | 3.2165719  | -1.0550836 | 5.7524659  |
| C  | -1.0644348 | 6.6085372  | 0.6805085  | C | 1.9176880  | 0.9971197  | 4.1887556  |
| C  | -0.2478934 | 4.7591267  | -0.7454935 | C | -2.7030025 | 3.1529681  | 4.0292744  |
| C  | -0.5987001 | 5.5433472  | -1.8834138 | H | 0.4292794  | 0.8213823  | 7.5623494  |
| C  | 0.3158709  | 3.4364479  | -0.8588959 | C | -0.4577711 | 0.7543299  | 4.4944051  |
| C  | 0.4216969  | 2.6809095  | 0.3124903  | C | 1.2850193  | 0.1534260  | 7.3388482  |
| O  | -0.5671911 | 0.9041887  | -1.8102438 | H | 1.4032036  | -0.5551371 | 8.1854034  |
| O  | 0.8654065  | 1.3591528  | 0.2371729  | H | -1.3052539 | 0.2840706  | 5.0193894  |
| P  | -0.1876832 | 0.2506017  | -0.3643257 | C | 3.8107958  | 1.4528057  | 1.7932071  |
| O  | 0.6810654  | -1.0099309 | -0.5514288 | H | 4.5923650  | 3.8914591  | 2.8935485  |
| O  | -1.4909867 | 0.1030869  | 0.4098994  | H | 3.1099605  | 4.2154030  | 3.8543653  |
| C  | 3.6238729  | 4.8680757  | -4.6892464 | C | 1.7134393  | 1.9252504  | 3.1522543  |
| C  | 3.2852287  | 5.4217189  | -3.4267824 | C | -3.1077602 | 0.8333647  | 3.1165798  |
| H  | 3.3539098  | 3.1964864  | -6.0383545 | C | -0.7187392 | 1.6843871  | 3.4704814  |
| H  | 4.3352279  | 5.3905857  | -5.3468312 | H | -2.0642033 | 4.0571932  | 4.0050435  |
| H  | 2.1365561  | 5.2189908  | -1.6162431 | H | -2.7519637 | 2.8073754  | 5.0837507  |
| H  | 3.7478425  | 6.3659944  | -3.1013371 | C | 2.9304117  | 2.5288484  | 2.4530839  |
| C  | -1.1482782 | 6.8089660  | -1.7380069 | C | 0.3835352  | 2.2742402  | 2.7906422  |
| C  | -1.3701433 | 7.3555418  | -0.4465767 | C | -2.1583463 | 2.0423457  | 3.1118739  |
| H  | -0.4486076 | 5.1224403  | -2.8871519 | H | 3.2199539  | 0.8324999  | 1.0921095  |
| H  | -1.4245457 | 7.3885093  | -2.6319975 | H | -2.6823569 | -0.0198699 | 2.5528867  |
| H  | -1.8028788 | 8.3622537  | -0.3431696 | H | 4.2628938  | 0.7706839  | 2.5425274  |
| H  | -1.2601768 | 7.0092207  | 1.6875114  | H | 2.1472994  | -2.0653073 | 4.7523243  |
| C  | 1.5856244  | -1.4691550 | -3.7295135 | H | -3.3390842 | 0.4801433  | 4.1438746  |
| C  | 0.5478642  | -0.5148306 | -3.9286427 | H | 2.1972348  | 0.7842142  | 7.2915921  |
| C  | 1.2571231  | -2.8373009 | -3.7769068 | H | 2.5607316  | 3.1925540  | 1.6453607  |
| C  | -0.7826744 | -0.9507336 | -4.1780941 | H | -2.1508938 | 2.4428646  | 2.0763978  |
| C  | -1.0527906 | -2.3279863 | -4.2154111 | H | 2.9507397  | 0.7297857  | 4.4588286  |
| C  | -0.0507363 | -3.2911028 | -4.0047774 | C | -0.1079725 | -4.2961082 | 4.6043009  |
| H  | 2.0510756  | -3.5857256 | -3.6150480 | C | 0.1106666  | -4.0908794 | 3.2387255  |
| C  | -1.9162928 | 0.0425725  | -4.4207621 | C | -0.4338452 | -4.9933927 | 2.2956608  |
| H  | -2.0878574 | -2.6591147 | -4.3911721 | C | -1.1940612 | -6.1004685 | 2.7413736  |
| C  | -3.1363331 | -0.2306277 | -3.5260891 | C | -1.4105060 | -6.3024138 | 4.1086240  |
| H  | -3.6833282 | -1.1463095 | -3.8329447 | C | -0.8682632 | -5.3982982 | 5.0391830  |
| H  | -3.8483348 | 0.6187347  | -3.5625260 | H | 0.3203112  | -3.5948345 | 5.3345497  |
| H  | -2.8255299 | -0.3882014 | -2.4754650 | H | 0.7154873  | -3.2342922 | 2.9058196  |
| C  | -2.3007611 | 0.0786880  | -5.9115639 | C | -0.2804369 | -4.8164696 | 0.8517879  |
| H  | -1.5415526 | 1.0528187  | -4.1603674 | H | -1.6240879 | -6.7920527 | 1.9996262  |
| H  | -2.6751566 | -0.9099325 | -6.2511338 | H | -2.0036817 | -7.1623638 | 4.4534487  |
| H  | -1.4299398 | 0.3433497  | -6.5451818 | H | -1.0384205 | -5.5524973 | 6.1158487  |
| H  | -3.1005818 | 0.8258980  | -6.0951762 | O | 0.3513012  | -3.9230700 | 0.2660672  |
| C  | -0.3698903 | -4.7803070 | -4.0036415 | H | -0.7817974 | -5.5834713 | 0.2122535  |
| C  | -1.4268582 | -5.1295895 | -2.9414080 | C | -4.3642658 | -2.3213370 | 1.9860559  |
| H  | -1.5491455 | -6.2296479 | -2.8521720 | C | -4.1820238 | -1.8547029 | 0.7189614  |
| H  | -2.4171137 | -4.7001230 | -3.1964009 | C | -3.1301636 | -2.7086939 | 0.0911011  |
| H  | -1.1533051 | -4.7041255 | -1.9566891 | O | -2.7437454 | -3.6782128 | 1.0104703  |
| C  | -0.7861808 | -5.2733883 | -5.4009969 | C | -3.4534923 | -3.4798518 | 2.2395459  |
| H  | 0.5712904  | -5.3073358 | -3.7290184 | O | -2.6336986 | -2.6536455 | -1.0135701 |
| H  | -0.9722113 | -6.3677553 | -5.3987787 | C | -4.7395228 | -0.7120039 | -0.0071478 |
| H  | -0.0031944 | -5.0573549 | -6.1555343 | H | -2.7111378 | -3.2896655 | 3.0506089  |
| H  | -1.7203119 | -4.7754923 | -5.7355481 | H | -3.9878944 | -4.4224412 | 2.5002608  |
| C  | 3.0396136  | -1.0757567 | -3.4591242 | H | -5.6655806 | -0.3193949 | 0.4554451  |
| C  | 3.5910811  | -1.6727094 | -2.1530564 | H | -4.9320949 | -0.9670544 | -1.0697516 |
| H  | 4.6471016  | -1.3739914 | -1.9926806 | H | -5.0556115 | -1.9231406 | 2.7412903  |
| H  | 3.5597267  | -2.7824474 | -2.1451700 |   |            |            |            |

## TS2; COSMO

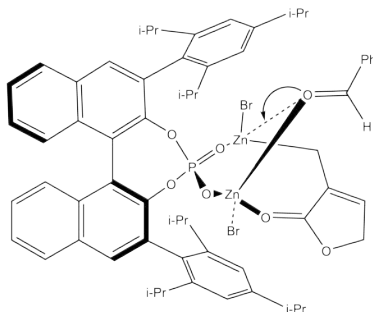

Energy (Hartree) = -11970.03920085

|    |            |            |            |
|----|------------|------------|------------|
| Zn | 2.9761004  | 0.6106141  | -0.1860845 |
| Br | 5.2003952  | 0.0236394  | -0.5314403 |
| Zn | -1.2754313 | 2.4075106  | 0.3320669  |
| Br | -3.5630486 | 2.0539859  | 0.0845950  |
| C  | -1.4954756 | -1.8953348 | 0.2986293  |
| C  | -2.3385194 | -2.3638457 | -0.7203191 |
| C  | -2.7887166 | -3.7339640 | -0.6462193 |
| C  | -3.4954698 | -4.3728973 | -1.7104791 |
| C  | -2.4905055 | -4.5110467 | 0.5325810  |
| C  | -2.9609962 | -5.8557544 | 0.6237737  |
| C  | -1.7108701 | -3.9317456 | 1.5727788  |
| H  | -1.5107932 | -4.5217849 | 2.4803793  |
| C  | -1.1714924 | -2.6551135 | 1.4625729  |
| C  | -1.9921753 | 0.0131346  | -3.7234081 |
| C  | -3.3137161 | 0.1209458  | -4.1389477 |
| H  | -3.5545023 | 0.7217907  | -5.0280469 |
| C  | -4.3852335 | -0.4691679 | -3.4063683 |
| C  | -5.7420689 | -0.2572053 | -3.7951020 |
| C  | -4.1072350 | -1.2437683 | -2.2205079 |
| C  | -5.2074597 | -1.7075926 | -1.4406710 |
| C  | -2.7319432 | -1.4814896 | -1.8561048 |
| C  | -1.7448731 | -0.8293223 | -2.5935755 |
| O  | -0.9853753 | -0.6056351 | 0.2534225  |
| O  | -0.4153663 | -1.0090123 | -2.2088151 |
| P  | 0.0607735  | -0.1123576 | -0.9294376 |
| O  | 1.5001721  | -0.5704483 | -0.6462817 |
| O  | -0.2191916 | 1.3800485  | -1.0818995 |
| C  | -3.6695710 | -6.4354816 | -0.4176712 |
| C  | -3.9232464 | -5.6888272 | -1.5995878 |
| H  | -2.7348012 | -6.4298363 | 1.5361557  |
| H  | -4.0212842 | -7.4754528 | -0.3383274 |
| H  | -3.6912054 | -3.8130591 | -2.6352454 |
| H  | -4.4589558 | -6.1588286 | -2.4385493 |
| C  | -6.5164619 | -1.4655790 | -1.8348769 |
| C  | -6.7896001 | -0.7494096 | -3.0306592 |
| H  | -5.0090380 | -2.2526081 | -0.5074466 |
| H  | -7.3487948 | -1.8259073 | -1.2110705 |
| H  | -7.8313627 | -0.5700500 | -3.3376325 |
| H  | -5.9414242 | 0.3266654  | -4.7075700 |
| C  | 1.0262946  | -2.5541462 | 2.7140757  |
| C  | -0.3158656 | -2.1069832 | 2.5648123  |
| C  | 1.7288349  | -2.2022377 | 3.8806012  |
| C  | -0.8767158 | -1.2220898 | 3.5205910  |
| C  | -0.1390541 | -0.9174429 | 4.6823555  |
| C  | 1.1483661  | -1.4310282 | 4.9077929  |
| H  | 2.7613336  | -2.5667388 | 4.0084396  |
| C  | -2.2738061 | -0.6315955 | 3.3459592  |
| H  | -0.6046551 | -0.2709918 | 5.4397341  |
| C  | -2.2865523 | 0.8896260  | 3.5679711  |
| H  | -2.0771316 | 1.1623174  | 4.6234183  |
| H  | -3.2718603 | 1.3151902  | 3.2919723  |
| H  | -1.5241035 | 1.3871352  | 2.9323719  |
| C  | -3.2979626 | -1.3480897 | 4.2445904  |
| H  | -2.5861828 | -0.7979441 | 2.2956518  |
| H  | -3.0434562 | -1.2248563 | 5.3184885  |

|   |            |            |            |
|---|------------|------------|------------|
| H | -3.3269228 | -2.4353200 | 4.0271756  |
| H | -4.3171386 | -0.9387107 | 4.0860288  |
| C | 1.9085736  | -1.2201747 | 6.2158346  |
| C | 1.2463647  | -0.2282870 | 7.1788978  |
| H | 1.9024480  | -0.0457381 | 8.0538404  |
| H | 0.2817569  | -0.6214287 | 7.5635009  |
| H | 1.0505278  | 0.7497766  | 6.6987409  |
| C | 2.1474587  | -2.5690087 | 6.9254205  |
| H | 2.9064130  | -0.8081211 | 5.9429436  |
| H | 2.7550677  | -2.4297393 | 7.8436312  |
| H | 2.6764584  | -3.2926463 | 6.2740231  |
| H | 1.1810104  | -3.0287588 | 7.2211758  |
| C | 1.7014252  | -3.4200220 | 1.6507585  |
| C | 3.1070768  | -2.9155385 | 1.2891193  |
| H | 3.5161948  | -3.4805946 | 0.4276071  |
| H | 3.8240203  | -3.0317307 | 2.1286737  |
| H | 3.0890014  | -1.8497143 | 0.9972465  |
| C | 1.7441666  | -4.9004164 | 2.0739348  |
| H | 1.0850095  | -3.3472802 | 0.7303938  |
| H | 2.2172665  | -5.5215697 | 1.2854025  |
| H | 0.7289043  | -5.3028312 | 2.2608210  |
| H | 2.3334477  | -5.0272837 | 3.0066449  |
| H | 2.6678045  | 4.0278204  | -4.8275655 |
| H | 0.9641495  | -1.1939291 | -7.2262092 |
| H | -3.7328185 | 4.0898805  | -4.2634374 |
| C | 2.8533865  | 2.9657088  | -5.1023700 |
| H | 1.3268340  | -3.2327596 | -4.7382765 |
| H | 4.8834890  | 3.0094907  | -4.2665056 |
| H | -2.4467144 | 4.5038710  | -2.0272220 |
| C | 1.5402719  | 2.2222174  | -4.8963759 |
| C | 0.0909025  | -1.6037860 | -6.6762051 |
| C | 3.9439318  | 2.4289903  | -4.1551993 |
| H | 4.1803107  | 1.3662772  | -4.3720731 |
| C | 1.4395782  | 0.8420240  | -5.1427794 |
| C | -2.8412748 | 3.5699032  | -4.6718767 |
| H | 2.5391332  | 3.3477412  | -7.2471622 |
| C | 0.4017473  | 2.8824131  | -4.4081798 |
| C | 3.3135985  | 2.9329755  | -6.5703320 |
| H | 4.2436331  | 3.5231054  | -6.7063595 |
| H | 0.4672713  | 3.9668554  | -4.2278082 |
| C | 1.4530251  | -2.1399571 | -4.5933023 |
| H | 0.0188240  | -2.6861092 | -6.9118708 |
| H | -0.8179065 | -1.1040337 | -7.0691749 |
| C | 0.2753463  | 0.1136939  | -4.8462536 |
| C | -1.5620475 | 4.1251084  | -2.5775051 |
| C | -0.7916407 | 2.2049445  | -4.0938492 |
| H | -3.1932394 | 2.7822251  | -5.3664243 |
| H | -2.2621290 | 4.3024878  | -5.2731130 |
| C | 0.2399282  | -1.3811602 | -5.1585487 |
| C | -0.8448063 | 0.7925799  | -4.2873908 |
| C | -1.9731025 | 2.9962434  | -3.5345410 |
| H | 1.5732614  | -1.9445901 | -3.5099127 |
| H | -0.8196241 | 3.7683675  | -1.8376944 |
| H | 2.3951244  | -1.8496441 | -5.1035424 |
| H | 3.6244807  | 2.4904138  | -3.0964777 |
| H | -1.1081481 | 4.9872620  | -3.1106340 |
| H | 3.5279750  | 1.8949439  | -6.9007881 |
| H | -0.6670237 | -1.8055160 | -4.6815167 |
| H | -2.5960287 | 2.2953425  | -2.9420856 |
| H | 2.3099006  | 0.3053485  | -5.5522345 |
| C | 2.6841779  | 2.7758299  | 5.7240411  |
| C | 2.6071008  | 2.2014515  | 4.4536077  |
| C | 3.6153350  | 1.3010841  | 4.0297435  |
| C | 4.6895179  | 0.9798100  | 4.8926081  |
| C | 4.7561544  | 1.5531983  | 6.1687146  |
| C | 3.7558400  | 2.4510043  | 6.5808313  |
| H | 1.9068387  | 3.4785293  | 6.0594686  |
| H | 1.7804886  | 2.4382957  | 3.7676151  |
| C | 3.5968564  | 0.7316165  | 2.6882680  |
| H | 5.4699153  | 0.2813903  | 4.5509230  |
| H | 5.5882149  | 1.3044610  | 6.8438709  |

|   |            |           |            |
|---|------------|-----------|------------|
| H | 3.8084420  | 2.9040283 | 7.5827935  |
| O | 2.7093475  | 0.9797747 | 1.8518107  |
| H | 4.4553918  | 0.0731164 | 2.3988475  |
| C | 0.7655866  | 5.4668967 | -0.1747492 |
| C | 0.9336818  | 4.1709309 | 0.2312370  |
| C | 1.9719762  | 3.6112785 | -0.6768553 |
| O | 2.3441367  | 4.5271585 | -1.5938719 |
| C | 1.6289197  | 5.7508171 | -1.3536610 |
| O | 2.5211128  | 2.5051997 | -0.6825688 |
| C | 0.2346870  | 3.3782035 | 1.2550205  |
| H | 1.0537403  | 6.0008463 | -2.2736060 |
| H | 2.3757149  | 6.5599629 | -1.1941103 |
| H | -0.1582422 | 4.0091338 | 2.0749632  |
| H | 0.8841352  | 2.5768657 | 1.6612980  |
| H | 0.0735978  | 6.2030294 | 0.2565550  |

## TS2

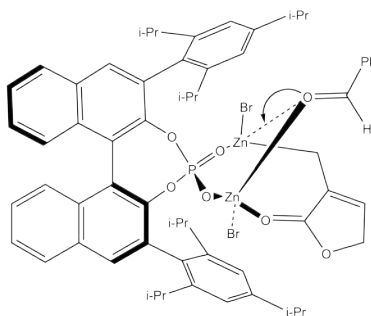

Energy (Hartree) = -11970.02557841  
number of imaginary frequencies: 1

|    |            |            |            |
|----|------------|------------|------------|
| Zn | 3.0050001  | 0.5922398  | -0.2141664 |
| Br | 5.2325858  | 0.0227138  | -0.4882423 |
| Zn | -1.2857301 | 2.3846944  | 0.3316792  |
| Br | -3.5657887 | 2.0448686  | 0.0870665  |
| C  | -1.4854208 | -1.8884829 | 0.2962961  |
| C  | -2.3293311 | -2.3594804 | -0.7207291 |
| C  | -2.7819152 | -3.7284734 | -0.6408186 |
| C  | -3.4889789 | -4.3701595 | -1.7027877 |
| C  | -2.4872944 | -4.5010669 | 0.5415077  |
| C  | -2.9610782 | -5.8437139 | 0.6374515  |
| C  | -1.7090660 | -3.9179733 | 1.5801670  |
| H  | -1.5120667 | -4.5022161 | 2.4922410  |
| C  | -1.1667232 | -2.6433139 | 1.4647206  |
| C  | -1.9882554 | 0.0105253  | -3.7299177 |
| C  | -3.3101288 | 0.1132251  | -4.1450672 |
| H  | -3.5514471 | 0.7119592  | -5.0353912 |
| C  | -4.3802505 | -0.4769111 | -3.4111148 |
| C  | -5.7373680 | -0.2694540 | -3.7994874 |
| C  | -4.1001766 | -1.2463591 | -2.2226256 |
| C  | -5.1989391 | -1.7085830 | -1.4402583 |
| C  | -2.7240706 | -1.4808503 | -1.8587703 |
| C  | -1.7386278 | -0.8292880 | -2.5987488 |
| O  | -0.9704797 | -0.6010894 | 0.2475207  |
| O  | -0.4082382 | -1.0073613 | -2.2161145 |
| P  | 0.0720685  | -0.1094278 | -0.9402210 |
| O  | 1.5115676  | -0.5688339 | -0.6600151 |
| O  | -0.2095594 | 1.3831453  | -1.0896292 |
| C  | -3.6697238 | -6.4260137 | -0.4017178 |
| C  | -3.9202238 | -5.6839580 | -1.5864614 |
| H  | -2.7369874 | -6.4144150 | 1.5524546  |
| H  | -4.0239543 | -7.4647351 | -0.3181567 |
| H  | -3.6822532 | -3.8127714 | -2.6293917 |
| H  | -4.4564370 | -6.1558820 | -2.4239247 |
| C  | -6.5080536 | -1.4708643 | -1.8350688 |
| C  | -6.7831638 | -0.7606028 | -3.0331143 |

|   |            |            |            |
|---|------------|------------|------------|
| H | -4.9984189 | -2.2482049 | -0.5045351 |
| H | -7.3391203 | -1.8293427 | -1.2087037 |
| H | -7.8252930 | -0.5838109 | -3.3400195 |
| H | -5.9380495 | 0.3114512  | -4.7134862 |
| C | 1.0253059  | -2.5352947 | 2.7254845  |
| C | -0.3163900 | -2.0903351 | 2.5684186  |
| C | 1.7210304  | -2.1786908 | 3.8946447  |
| C | -0.8842307 | -1.2040067 | 3.5187145  |
| C | -0.1538001 | -0.8968355 | 4.6841138  |
| C | 1.1332251  | -1.4072732 | 4.9171933  |
| H | 2.7531265  | -2.5423793 | 4.0288892  |
| C | -2.2815299 | -0.6171623 | 3.3340346  |
| H | -0.6261721 | -0.2518748 | 5.4384468  |
| C | -2.3065546 | 0.9011450  | 3.5732435  |
| H | -2.1187932 | 1.1634258  | 4.6355631  |
| H | -3.2882829 | 1.3248328  | 3.2827043  |
| H | -1.5358641 | 1.4104315  | 2.9573233  |
| C | -3.3132052 | -1.3498068 | 4.2105498  |
| H | -2.5800681 | -0.7715287 | 2.2779479  |
| H | -3.0726223 | -1.2396973 | 5.2890373  |
| H | -3.3344682 | -2.4341215 | 3.9791297  |
| H | -4.3319981 | -0.9430282 | 4.0441898  |
| C | 1.8843557  | -1.1948712 | 6.2303541  |
| C | 1.2150493  | -0.2023588 | 7.1879343  |
| H | 1.8648017  | -0.0167932 | 8.0670361  |
| H | 0.2491352  | -0.5965346 | 7.5676847  |
| H | 1.0190363  | 0.7743494  | 6.7050610  |
| C | 2.1170876  | -2.5425871 | 6.9437564  |
| H | 2.8844517  | -0.7829175 | 5.9650129  |
| H | 2.7180508  | -2.4040301 | 7.8664780  |
| H | 2.6487334  | -3.2681513 | 6.2969603  |
| H | 1.1482031  | -3.0013218 | 7.2320108  |
| C | 1.7050371  | -3.4058423 | 1.6689354  |
| C | 3.1121383  | -2.9047187 | 1.3096570  |
| H | 3.5253889  | -3.4742351 | 0.4533859  |
| H | 3.8268923  | -3.0164250 | 2.1518606  |
| H | 3.0974147  | -1.8412640 | 1.0096082  |
| C | 1.7444450  | -4.8841192 | 2.0993818  |
| H | 1.0923080  | -3.3373294 | 0.7458674  |
| H | 2.2204559  | -5.5094737 | 1.3161505  |
| H | 0.7281494  | -5.2849372 | 2.2828713  |
| H | 2.3287325  | -5.0078725 | 3.0355732  |
| H | 2.6572547  | 4.0425069  | -4.8269534 |
| H | 0.9674797  | -1.1767014 | -7.2351217 |
| H | -3.7468394 | 4.0771412  | -4.2755718 |
| C | 2.8471910  | 2.9809882  | -5.1018973 |
| H | 1.3393357  | -3.2251156 | -4.7541562 |
| H | 4.8778579  | 3.0325150  | -4.2667279 |
| H | -2.4683485 | 4.4935559  | -2.0338469 |
| C | 1.5366754  | 2.2326599  | -4.8971892 |
| C | 0.0968863  | -1.5915083 | -6.6848947 |
| C | 3.9403163  | 2.4491834  | -4.1551591 |
| H | 4.1815739  | 1.3874571  | -4.3708353 |
| C | 1.4415500  | 0.8523572  | -5.1435591 |
| C | -2.8511991 | 3.5627040  | -4.6817775 |
| H | 2.5303105  | 3.3616723  | -7.2465492 |
| C | 0.3944143  | 2.8880820  | -4.4121501 |
| C | 3.3069288  | 2.9511039  | -6.5699529 |
| H | 4.2346159  | 3.5446453  | -6.7066921 |
| H | 0.4546561  | 3.9732660  | -4.2340803 |
| C | 1.4632302  | -2.1326332 | -4.6058142 |
| H | 0.0275216  | -2.6729236 | -6.9252487 |
| H | -0.8134416 | -1.0922468 | -7.0743714 |
| C | 0.2795208  | 0.1196920  | -4.8507155 |
| C | -1.5805708 | 4.1222099  | -2.5840121 |
| C | -0.7967489 | 2.2063970  | -4.1000771 |
| H | -3.1962899 | 2.7741010  | -5.3784983 |
| H | -2.2744420 | 4.2979798  | -5.2818674 |
| C | 0.2480947  | -1.3743679 | -5.1667633 |
| C | -0.8438280 | 0.7940986  | -4.2935815 |
| C | -1.9830111 | 2.9921822  | -3.5431956 |

|   |            |            |            |
|---|------------|------------|------------|
| H | 1.5855996  | -1.9424723 | -3.5219145 |
| H | -0.8374617 | 3.7682681  | -1.8437072 |
| H | 2.4045753  | -1.8399116 | -5.1159516 |
| H | 3.6234923  | 2.5107044  | -3.0958192 |
| H | -1.1322126 | 4.9880599  | -3.1165537 |
| H | 3.5254909  | 1.9143583  | -6.9011877 |
| H | -0.6573167 | -1.8021676 | -4.6897912 |
| H | -2.6044272 | 2.2892798  | -2.9515142 |
| H | 2.3146605  | 0.3190179  | -5.5512327 |
| C | 2.7457523  | 2.7253249  | 5.7324178  |
| C | 2.6530083  | 2.1636107  | 4.4571146  |
| C | 3.6513669  | 1.2623739  | 4.0153181  |
| C | 4.7313257  | 0.9281741  | 4.8642515  |
| C | 4.8140710  | 1.4886631  | 6.1451518  |
| C | 3.8229901  | 2.3873162  | 6.5758209  |
| H | 1.9752151  | 3.4288387  | 6.0817544  |
| H | 1.8216111  | 2.4099435  | 3.7801296  |
| C | 3.6148213  | 0.7050100  | 2.6657377  |
| H | 5.5039808  | 0.2286902  | 4.5072316  |
| H | 5.6515170  | 1.2291861  | 6.8095874  |
| H | 3.8875757  | 2.8301955  | 7.5816317  |
| O | 2.7215582  | 0.9680757  | 1.8436442  |
| H | 4.4673737  | 0.0463532  | 2.3567075  |
| C | 0.7406359  | 5.4459940  | -0.1693072 |
| C | 0.9171205  | 4.1523914  | 0.2408475  |
| C | 1.9587228  | 3.5955762  | -0.6685904 |
| O | 2.3207462  | 4.5118409  | -1.5914249 |
| C | 1.5963785  | 5.7283592  | -1.3556897 |
| O | 2.5148732  | 2.4957590  | -0.6669391 |
| C | 0.2265045  | 3.3551856  | 1.2634842  |
| H | 1.0130774  | 5.9646125  | -2.2746666 |
| H | 2.3373976  | 6.5458210  | -1.2078914 |
| H | -0.1716297 | 3.9800821  | 2.0855276  |
| H | 0.8779922  | 2.5528868  | 1.6641139  |
| H | 0.0430566  | 6.1775052  | 0.2605885  |

|   |            |            |            |
|---|------------|------------|------------|
| C | -2.5463644 | 0.8299809  | 4.1211295  |
| C | -2.6174489 | 2.0469848  | 4.8623889  |
| C | -1.3684292 | 0.4191834  | 3.3954871  |
| C | -1.4790336 | -0.6896000 | 2.5511114  |
| O | 0.0031249  | 1.3279101  | 1.0731472  |
| O | -0.3621571 | -1.0792409 | 1.8124381  |
| P | -0.0302082 | -0.2031501 | 0.4696384  |
| O | 1.3592434  | -0.6829774 | 0.0254235  |
| O | -1.1741171 | -0.1743323 | -0.5458034 |
| C | 1.8676689  | 2.0965048  | 7.1912432  |
| C | 0.7499570  | 1.2200809  | 7.1729465  |
| H | 3.2308765  | 3.2838979  | 5.9992188  |
| H | 2.3588098  | 2.3413483  | 8.1454016  |
| H | -0.7439065 | 0.2249297  | 5.9783769  |
| H | 0.3871163  | 0.7765653  | 8.1128158  |
| C | -3.7663631 | 2.3960067  | 5.5589456  |
| C | -4.9035208 | 1.5447802  | 5.5507050  |
| H | -1.7517568 | 2.7231905  | 4.8662201  |
| H | -3.7980043 | 3.3452579  | 6.1154536  |
| H | -5.8060580 | 1.8277796  | 6.1137457  |
| H | -5.7677599 | -0.2791616 | 4.7657258  |
| C | 3.4914092  | 2.0717296  | 0.5345423  |
| C | 2.3279186  | 2.7591114  | 0.9708656  |
| C | 3.9214268  | 2.2560496  | -0.7959517 |
| C | 1.6461468  | 3.6520536  | 0.0918978  |
| C | 2.1144836  | 3.7913954  | -1.2231090 |
| C | 3.2342659  | 3.0804503  | -1.6975581 |
| H | 4.8117029  | 1.7107495  | -1.1474589 |
| C | 0.4560165  | 4.4730210  | 0.5874303  |
| H | 1.5796932  | 4.4625281  | -1.9110741 |
| C | -0.4875554 | 4.9483255  | -0.5240949 |
| H | -0.0159451 | 5.7097843  | -1.1801191 |
| H | -1.3975854 | 5.4002717  | -0.0832766 |
| H | -0.8208536 | 4.1043002  | -1.1620111 |
| C | 0.9479944  | 5.6658427  | 1.4319435  |
| H | -0.1476413 | 3.8214279  | 1.2532069  |
| H | 1.5629004  | 6.3549223  | 0.8156336  |
| H | 1.5686419  | 5.3294569  | 2.2864096  |
| H | 0.0899785  | 6.2403176  | 1.8383774  |
| C | 3.6618153  | 3.1867279  | -3.1559676 |
| C | 2.5305823  | 2.7433543  | -4.1030292 |
| H | 2.8841024  | 2.7003880  | -5.1543626 |
| H | 1.6792129  | 3.4549084  | -4.0674550 |
| H | 2.1365626  | 1.7453832  | -3.8252919 |
| C | 4.1712921  | 4.5953197  | -3.5088102 |
| H | 4.5140476  | 2.4831534  | -3.2918740 |
| H | 4.5176421  | 4.6409994  | -4.5624392 |
| H | 5.0142992  | 4.8950879  | -2.8540756 |
| H | 3.3667555  | 5.3506584  | -3.3881201 |
| C | 4.2994390  | 1.1652673  | 1.4632647  |
| C | 4.6186023  | -0.2137437 | 0.8641543  |
| H | 5.1708939  | -0.8299127 | 1.6032397  |
| H | 5.2486731  | -0.1439940 | -0.0460256 |
| H | 3.6878656  | -0.7470372 | 0.5947685  |
| C | 5.5836967  | 1.8869354  | 1.9170590  |
| H | 3.6856711  | 0.9837172  | 2.3681552  |
| H | 6.1521600  | 1.2649577  | 2.6394644  |
| H | 5.3561446  | 2.8577414  | 2.4028706  |
| H | 6.2486732  | 2.0962907  | 1.0524702  |
| H | -3.6154289 | -5.0686669 | -2.6511591 |
| H | -1.5335374 | -6.1008221 | 2.7734646  |
| H | -6.5639859 | -0.4459153 | 0.4054232  |
| C | -2.8427614 | -5.4289491 | -1.9348450 |
| H | 1.1226129  | -4.3158525 | 3.0113975  |
| H | -1.5451928 | -6.1109504 | -3.5702834 |
| H | -4.9006101 | 0.5222032  | -1.3521069 |
| C | -2.8202459 | -4.4348890 | -0.7808931 |
| C | -1.5219405 | -5.1711526 | 3.3804758  |
| C | -1.4936605 | -5.4560187 | -2.6752468 |
| H | -0.6838181 | -5.8395807 | -2.0212430 |
| C | -1.9691731 | -4.6087773 | 0.3238059  |

### int1; COSMO

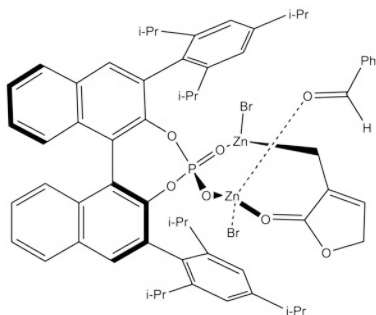

Energy (Hartree) = -11970.04431578

|    |            |            |            |
|----|------------|------------|------------|
| Zn | 1.8188225  | -1.4892491 | -1.6953394 |
| Br | 1.8790929  | -3.8035476 | -1.9448067 |
| Zn | -2.0551930 | 1.6015228  | -1.0915711 |
| Br | -3.2805423 | 2.5677880  | 0.6477291  |
| C  | 0.5512994  | 1.6176163  | 2.3137698  |
| C  | -0.0826392 | 1.1711616  | 3.4790363  |
| C  | 0.5624083  | 1.4608058  | 4.7388620  |
| C  | 0.1139464  | 0.9114425  | 5.9780747  |
| C  | 1.7298149  | 2.3118725  | 4.7544433  |
| C  | 2.3488851  | 2.6240856  | 6.0022468  |
| C  | 2.2707328  | 2.7938177  | 3.5267064  |
| H  | 3.1656851  | 3.4346915  | 3.5547601  |
| C  | 1.7301093  | 2.4268672  | 2.3016620  |
| C  | -2.6641121 | -1.4752105 | 2.3996555  |
| C  | -3.7399279 | -1.1473559 | 3.2165325  |
| H  | -4.6554772 | -1.7554298 | 3.1703703  |
| C  | -3.7235828 | -0.0026434 | 4.0635460  |
| C  | -4.8809780 | 0.3727098  | 4.8099520  |

|   |            |            |            |
|---|------------|------------|------------|
| C | -5.9511369 | -1.3684319 | 0.4774710  |
| H | -4.2455623 | -6.8233057 | -0.9698086 |
| C | -3.6343554 | -3.2920419 | -0.8019484 |
| C | -3.2590594 | -6.8375008 | -1.4759325 |
| H | -3.3231090 | -7.5321455 | -2.3391722 |
| H | -4.3058052 | -3.1437668 | -1.6634792 |
| C | 0.4669503  | -4.1941116 | 2.1244085  |
| H | -0.8811053 | -5.3555792 | 4.2677747  |
| H | -2.5569094 | -4.9888281 | 3.7353352  |
| C | -1.9150226 | -3.6835404 | 1.3813572  |
| C | -4.4517804 | -0.4919839 | -1.3466385 |
| C | -3.6099661 | -2.3235085 | 0.2194371  |
| H | -6.0278623 | -1.7462560 | 1.5156742  |
| H | -6.4037500 | -2.1337902 | -0.1881884 |
| C | -0.9923625 | -3.9774539 | 2.5627114  |
| C | -2.7428051 | -2.5258145 | 1.3338649  |
| C | -4.4924932 | -1.0843577 | 0.0724229  |
| H | 0.8386116  | -3.3358515 | 1.5323916  |
| H | -3.4094735 | -0.4266829 | -1.7199268 |
| H | 0.5793600  | -5.1052653 | 1.5010512  |
| H | -1.1781500 | -4.4425405 | -2.9945710 |
| H | -5.0140065 | -1.1070205 | -2.0806557 |
| H | -2.5206985 | -7.2604251 | -0.7630178 |
| H | -1.0094084 | -3.0960789 | 3.2349527  |
| H | -4.0946395 | -0.3023791 | 0.7502877  |
| H | -1.3151791 | -5.4941296 | 0.3631973  |
| C | 2.1621338  | -1.6687844 | -6.3517826 |
| C | 2.6133213  | -1.5339194 | -5.0364413 |
| C | 3.7119855  | -0.6846004 | -4.7553376 |
| C | 4.3643864  | -0.0030822 | -5.8121763 |
| C | 3.8990928  | -0.1330392 | -7.1253213 |
| C | 2.7950962  | -0.9626574 | -7.3932257 |
| H | 1.3118474  | -2.3325411 | -6.5689278 |
| H | 2.1356967  | -2.1135234 | -4.2325091 |
| C | 4.1974038  | -0.4485847 | -3.3973182 |
| H | 5.2268099  | 0.6452552  | -5.5886405 |
| H | 4.3957125  | 0.4085684  | -7.9439925 |
| H | 2.4298944  | -1.0686221 | -8.4264544 |
| O | 3.6315997  | -0.7436837 | -2.3340859 |
| H | 5.1841209  | 0.0769584  | -3.3244079 |
| C | -2.4637935 | -0.2906050 | -4.2640433 |
| C | -1.5206112 | 0.4548048  | -3.6074297 |
| C | -0.3885927 | -0.4684907 | -3.3853706 |
| O | -0.6511683 | -1.6929478 | -3.8719439 |
| C | -1.9788975 | -1.6892678 | -4.4367068 |
| O | 0.7021074  | -0.2164158 | -2.8430742 |
| C | -1.5408367 | 1.8072050  | -3.0383884 |
| H | -2.5838728 | -2.4383209 | -3.8770427 |
| H | -1.9024830 | -2.0329329 | -5.4915675 |
| H | -2.2645107 | 2.4749377  | -3.5430511 |
| H | -0.5312504 | 2.2661222  | -3.0391632 |
| H | -3.4621473 | 0.0417378  | -4.5786992 |

|   |            |            |            |
|---|------------|------------|------------|
| C | 0.5557356  | 1.6173622  | 2.3120278  |
| C | -0.0804127 | 1.1711467  | 3.4761070  |
| C | 0.5612138  | 1.4637573  | 4.7369215  |
| C | 0.1107919  | 0.9150255  | 5.9753654  |
| C | 1.7262928  | 2.3175108  | 4.7548332  |
| C | 2.3407318  | 2.6321626  | 6.0037265  |
| C | 2.2680448  | 2.7998943  | 3.5280709  |
| H | 3.1610861  | 3.4434630  | 3.5564343  |
| C | 1.7312732  | 2.4309959  | 2.3021216  |
| C | -2.6585886 | -1.4775427 | 2.3944863  |
| C | -3.7333868 | -1.1525733 | 3.2135111  |
| H | -4.6478001 | -1.7621314 | 3.1658083  |
| C | -3.7186879 | -0.0091032 | 4.0617368  |
| C | -4.8753483 | 0.3637024  | 4.8096232  |
| C | -2.5436475 | 0.8264671  | 4.1175242  |
| C | -2.6172473 | 2.0437742  | 4.8575143  |
| C | -1.3650786 | 0.4174861  | 3.3917101  |
| C | -1.4742066 | -0.6913375 | 2.5474884  |
| O | 0.0142743  | 1.3240765  | 1.0691646  |
| O | -0.3566115 | -1.0814168 | 1.8104383  |
| P | -0.0198638 | -0.2079772 | 0.4695024  |
| O | 1.3710684  | -0.6891679 | 0.0285955  |
| O | -1.1569899 | -0.1773208 | -0.5538948 |
| C | 1.8577022  | 2.1053285  | 7.1916184  |
| C | 0.7424224  | 1.2268371  | 7.1711549  |
| H | 3.2212496  | 3.2939145  | 6.0021215  |
| H | 2.3457411  | 2.3525217  | 8.1466987  |
| H | -0.7457855 | 0.2271607  | 5.9730742  |
| H | 0.3776056  | 0.7838303  | 8.1104184  |
| C | -3.7657877 | 2.3895025  | 5.5554212  |
| C | -4.8999908 | 1.5354509  | 5.5496800  |
| H | -1.7536326 | 2.7223985  | 4.8582184  |
| H | -3.7994468 | 3.3395426  | 6.1102483  |
| H | -5.8027124 | 1.8164302  | 6.1132693  |
| H | -5.7606471 | -0.2901262 | 4.7659448  |
| C | 3.4971046  | 2.0871426  | 0.5376688  |
| C | 3.3296827  | 2.7680119  | 0.9728137  |
| C | 3.9304523  | 2.2786065  | -0.7904436 |
| C | 1.6463658  | 3.6611341  | 0.0953164  |
| C | 2.1186745  | 3.8073983  | -1.2172911 |
| C | 3.2433246  | 3.1040123  | -1.6903706 |
| H | 4.8248927  | 1.7388283  | -1.1404290 |
| C | 0.4495395  | 4.4736681  | 0.5886236  |
| H | 1.5829818  | 4.4793525  | -1.9036812 |
| C | -0.4855961 | 4.9584820  | -0.5258604 |
| H | -0.0125667 | 5.7332266  | -1.1653529 |
| H | -1.4040235 | 5.3960069  | -0.0884976 |
| H | -0.8074675 | 4.1224286  | -1.1798899 |
| C | 0.9297665  | 5.6592687  | 1.4496354  |
| H | -0.1593450 | 3.8138882  | 1.2414977  |
| H | 1.5498707  | 6.3555241  | 0.8469758  |
| H | 1.5414177  | 5.3167200  | 2.3078319  |
| H | 0.0659182  | 6.2275027  | 1.8520349  |
| C | 3.6747147  | 3.2187528  | -3.1470196 |
| C | 2.5522433  | 2.7621102  | -4.0983028 |
| H | 2.9064927  | 2.7260055  | -5.1498197 |
| H | 1.6917645  | 3.4624263  | -4.0632961 |
| H | 2.1681408  | 1.7594620  | -3.8231723 |
| C | 4.1679271  | 4.6337700  | -3.4961636 |
| H | 4.5365635  | 2.5258170  | -3.2807728 |
| H | 4.5171230  | 4.6875162  | -4.5485281 |
| H | 5.0037762  | 4.9432416  | -2.8372048 |
| H | 3.3541348  | 5.3789025  | -3.3761032 |
| C | 4.3059342  | 1.1803650  | 1.4653204  |
| C | 4.6292656  | -0.1963421 | 0.8635649  |
| H | 5.1817730  | -0.8135472 | 1.6013860  |
| H | 5.2614524  | -0.1238956 | -0.0450595 |
| H | 3.7007435  | -0.7321339 | 0.5923245  |
| C | 5.5872453  | 1.9043984  | 1.9230486  |
| H | 3.6909053  | 0.9947668  | 2.3685025  |
| H | 6.1564599  | 1.2828948  | 2.6451410  |

int1

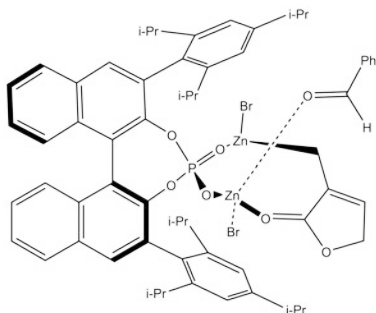

Energy (Hartree) = -11970.03111979

|    |            |            |            |
|----|------------|------------|------------|
| Zn | 1.8197191  | -1.5295719 | -1.6729264 |
| Br | 1.8990639  | -3.8289134 | -1.9654930 |
| Zn | -2.0277861 | 1.6149013  | -1.0800648 |
| Br | -3.2638657 | 2.5768151  | 0.6403064  |



|   |            |            |            |
|---|------------|------------|------------|
| H | 5.3565849  | 2.8739042  | 2.4096717  |
| H | 6.2535145  | 2.1183219  | 1.0607031  |
| H | -3.5969480 | -5.0222945 | -2.6918932 |
| H | -1.5311976 | -6.1022374 | 2.7293082  |
| H | -6.5773218 | -0.4590253 | 0.4280495  |
| C | -2.8388165 | -5.3995579 | -1.9680551 |
| H | 1.1298530  | -4.3284033 | 2.9866047  |
| H | -1.5394068 | -6.1073485 | -3.5912034 |
| H | -4.9256127 | 0.5409710  | -1.3217351 |
| C | -2.8117993 | -4.4102563 | -0.8100414 |
| C | -1.5177505 | -5.1771689 | 3.3430804  |
| C | -1.4831997 | -5.4556050 | -2.6941918 |
| H | -0.6883370 | -5.8598434 | -2.0345531 |
| C | -1.9553627 | -4.5888707 | 0.2893771  |
| C | -5.9578106 | -1.3778141 | 0.4869977  |
| H | -4.2832323 | -6.7634644 | -1.0214648 |
| C | -3.6336949 | -3.2731681 | -0.8163089 |
| C | -3.2915361 | -6.7990886 | -1.5156919 |
| H | -3.3589349 | -7.4932223 | -2.3790845 |
| H | -4.3139144 | -3.1234591 | -1.6709186 |
| C | 0.4770684  | -4.1959118 | 2.0992888  |
| H | -0.8797260 | -5.3707129 | 4.2303707  |
| H | -2.5530474 | -4.9948261 | 3.6963632  |
| C | -1.9042966 | -3.6748665 | 1.3563611  |
| C | -4.4700686 | -0.4699473 | -1.3303183 |
| C | -3.6108387 | -2.3134780 | 0.2132550  |
| H | -6.0289086 | -1.7689353 | 1.5205275  |
| H | -6.4070118 | -2.1393913 | -0.1851456 |
| C | -0.9824548 | -3.9789541 | 2.5356967  |
| C | -2.7381302 | -2.5210803 | 1.3221186  |
| C | -4.5023916 | -1.0789790 | 0.0816426  |
| H | 0.8549148  | -3.3326795 | 1.5189442  |
| H | -3.4286670 | -0.3904779 | -1.7032240 |
| H | 0.5907793  | -5.1004671 | 1.4668207  |
| H | -1.1388318 | -4.4497167 | -3.0073616 |
| H | -5.0292239 | -1.0815949 | -2.0699704 |
| H | -2.5719242 | -7.2364427 | -0.7926218 |
| H | -0.9988969 | -3.1027260 | 3.2145554  |
| H | -4.1085842 | -0.3000744 | 0.7654083  |
| H | -1.2958370 | -5.4703884 | 0.3181714  |
| C | 2.1853513  | -1.7844588 | -6.3315048 |
| C | 2.6300526  | -1.6080770 | -5.0185754 |
| C | 3.6927925  | -0.7097563 | -4.7549026 |
| C | 4.3148130  | -0.0203566 | -5.8240824 |
| C | 3.8556421  | -0.1926220 | -7.1341082 |
| C | 2.7876087  | -1.0724684 | -7.3859192 |
| H | 1.3630668  | -2.4871096 | -6.5335173 |
| H | 2.1780441  | -2.1936607 | -4.2033766 |
| C | 4.1713501  | -0.4347478 | -3.3996599 |
| H | 5.1484609  | 0.6685186  | -5.6121075 |
| H | 4.3286634  | 0.3548782  | -7.9628185 |
| H | 2.4275373  | -1.2121803 | -8.4170266 |
| O | 3.6229160  | -0.7361337 | -2.3324601 |
| H | 5.1374138  | 0.1325286  | -3.3397728 |
| C | -2.4650593 | -0.2998677 | -4.2185658 |
| C | -1.5047685 | 0.4448041  | -3.5858246 |
| C | -0.3779725 | -0.4885287 | -3.3682804 |
| O | -0.6630943 | -1.7174514 | -3.8346965 |
| C | -2.0015752 | -1.7091110 | -4.3685498 |
| O | 0.7242148  | -0.2442000 | -2.8492250 |
| C | -1.5043315 | 1.8011155  | -3.0312292 |
| H | -2.6020520 | -2.4354198 | -3.7742450 |
| H | -1.9526744 | -2.0815940 | -5.4157676 |
| H | -2.2188775 | 2.4759900  | -3.5391167 |
| H | -0.4885828 | 2.2454263  | -3.0331772 |
| H | -3.4653569 | 0.0400077  | -4.5182332 |

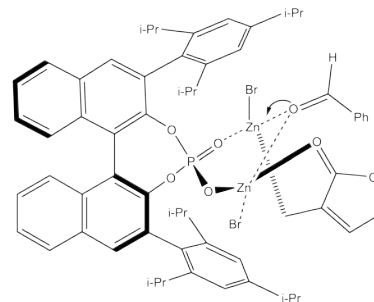

Energy (Hartree) = -11970.03980938

|   |            |            |            |
|---|------------|------------|------------|
| C | 1.1361115  | 2.1067103  | 1.2698800  |
| C | 2.5378307  | 2.1436206  | 1.3056603  |
| C | 3.1807508  | 3.4390592  | 1.3626151  |
| C | 4.5886004  | 3.6232890  | 1.2052199  |
| C | 2.3662227  | 4.6150270  | 1.5525195  |
| C | 2.9913302  | 5.8927750  | 1.6762875  |
| C | 0.9492796  | 4.4950248  | 1.5220182  |
| H | 0.3375252  | 5.4067071  | 1.6010068  |
| C | 0.3176017  | 3.2769048  | 1.2971176  |
| C | 3.8957255  | -1.1555799 | -0.1268629 |
| C | 5.0486990  | -1.3179306 | 0.6345757  |
| H | 5.7415534  | -2.1398208 | 0.3961324  |
| C | 5.3287337  | -0.4914230 | 1.7612052  |
| C | 6.4497222  | -0.7515098 | 2.6064104  |
| C | 4.4373817  | 0.5957456  | 2.0877020  |
| C | 4.6709010  | 1.3220225  | 3.2936875  |
| C | 3.3408764  | 0.8933099  | 1.1959122  |
| C | 3.0740628  | -0.0189468 | 0.1678945  |
| O | 0.4796560  | 0.8814350  | 1.2478350  |
| O | 1.9940492  | 0.2117129  | -0.6767480 |
| P | 0.4741909  | -0.0417998 | -0.1151007 |
| O | -0.4285248 | 0.5646567  | -1.2040574 |
| O | 0.2454638  | -1.4714205 | 0.3405224  |
| C | 4.3667221  | 6.0272459  | 1.5660211  |
| C | 5.1655674  | 4.8821805  | 1.3050534  |
| H | 2.3521331  | 6.7753844  | 1.8364624  |
| H | 4.8371840  | 7.0183585  | 1.6546756  |
| H | 5.2249294  | 2.7547513  | 0.9904444  |
| H | 6.2528741  | 4.9924266  | 1.1732735  |
| C | 5.7551261  | 1.0269117  | 4.1093198  |
| C | 6.6650646  | -0.0052717 | 3.7556902  |
| H | 3.9714758  | 2.1199184  | 3.5800152  |
| H | 5.9072362  | 1.5949337  | 5.0397864  |
| H | 7.5275071  | -0.2229876 | 4.4040053  |
| H | 7.1301278  | -1.5748774 | 2.3376042  |
| C | -1.5291062 | 3.7860412  | -0.3100854 |
| C | -1.1411103 | 3.2524172  | 0.9542682  |
| C | -2.8994171 | 3.9408373  | -0.5812606 |
| C | -2.1278747 | 2.7946624  | 1.8658696  |
| C | -3.4890864 | 2.9626185  | 1.5371849  |
| C | -3.8971547 | 3.5701775  | 0.3352607  |
| C | -1.7499736 | 2.1712806  | 3.2071003  |
| H | -4.2505845 | 2.6422472  | 2.2672540  |
| C | -2.2259731 | 0.7119079  | 3.3077316  |
| H | -3.3333956 | 0.6382362  | 3.2560318  |
| H | -1.9095812 | 0.2559276  | 4.2678760  |
| H | -1.8006328 | 0.0893592  | 2.4978489  |
| C | -2.2558651 | 3.0183311  | 4.3887975  |
| H | -0.6424217 | 2.1582097  | 3.2668637  |
| H | -3.3650695 | 3.0607066  | 4.4148159  |
| H | -1.8814043 | 4.0605102  | 4.3265454  |
| H | -1.9159919 | 2.5871868  | 5.3531085  |
| C | -5.3547500 | 3.9127837  | 0.0466577  |
| C | -6.3214031 | 2.7333791  | 0.2227345  |
| H | -7.3605691 | 3.0394904  | -0.0161770 |
| H | -6.3229411 | 2.3634180  | 1.2698508  |

## 7.8.4 Pathway 14j-mi ↔ 14d-mi

TS1; COSMO

|    |            |            |            |    |            |            |            |
|----|------------|------------|------------|----|------------|------------|------------|
| H  | -6.0534392 | 1.8979499  | -0.4557332 | O  | -4.0539159 | -2.6663050 | -2.3097567 |
| C  | -5.7916461 | 5.1202461  | 0.8992907  | C  | -4.7775584 | -3.8082763 | -1.8036189 |
| H  | -5.4020018 | 4.2182216  | -1.0211859 | O  | -1.9189839 | -1.9283683 | -2.2641201 |
| H  | -6.8275519 | 5.4311295  | 0.6493028  | C  | -1.1981950 | -4.3525998 | -0.6812084 |
| H  | -5.1215320 | 5.9885749  | 0.7380855  | H  | -5.2937788 | -4.2943355 | -2.6605673 |
| H  | -5.7625880 | 4.8713127  | 1.9811973  | H  | -5.5602239 | -3.4289242 | -1.1085056 |
| C  | -0.5124972 | 4.2091847  | -1.3737002 | Zn | -0.7964231 | -3.0901656 | 0.8409423  |
| C  | -0.7868776 | 3.5601528  | -2.7417630 | Br | -1.2273099 | -3.1212355 | 3.1598662  |
| H  | 0.0160953  | 3.8302868  | -3.4585156 | H  | -0.3880095 | -4.1167825 | -1.4005762 |
| H  | -1.7512403 | 3.8916553  | -3.1782054 | H  | -1.1088555 | -5.3968201 | -0.3260283 |
| H  | -0.8156752 | 2.4581586  | -2.6569030 | H  | -3.5045248 | -2.9330150 | 1.5287569  |
| C  | -0.4400993 | 5.7425585  | -1.5023675 | H  | -3.9815278 | -5.5987609 | -0.6252707 |
| H  | 0.4845686  | 3.8523137  | -1.0455462 | H  | -4.5759784 | 0.4661845  | 0.1260764  |
| H  | 0.3233750  | 6.0379832  | -2.2516437 | H  | -3.2089005 | 4.3712071  | -1.5465431 |
| H  | -0.1768517 | 6.2249810  | -0.5399213 |    |            |            |            |
| H  | -1.4152032 | 6.1599249  | -1.8306725 |    |            |            |            |
| H  | 0.9165832  | -5.6343847 | -3.2733171 |    |            |            |            |
| H  | 4.7349735  | -1.2625949 | -4.7898127 |    |            |            |            |
| H  | 4.3611985  | -5.6479097 | 1.6825244  |    |            |            |            |
| C  | 1.3472422  | -4.8224520 | -3.9007369 |    |            |            |            |
| H  | 3.0191133  | 1.3780120  | -4.0854001 |    |            |            |            |
| H  | -0.4426218 | -4.8252559 | -5.1666619 |    |            |            |            |
| H  | 2.2249073  | -4.5327025 | 2.5123818  |    |            |            |            |
| C  | 2.1091794  | -3.9007166 | -2.9572089 |    |            |            |            |
| C  | 4.9681584  | -0.6386898 | -3.9013353 |    |            |            |            |
| C  | 0.1788482  | -4.1033888 | -4.5978242 |    |            |            |            |
| H  | 0.5427470  | -3.3430467 | -5.3199961 |    |            |            |            |
| C  | 2.5559027  | -2.6331984 | -3.3700092 |    |            |            |            |
| C  | 4.1040455  | -5.3269977 | 0.6520589  |    |            |            |            |
| H  | 3.1064376  | -6.0389988 | -4.4197516 |    |            |            |            |
| C  | 2.4056387  | -4.3002310 | -1.6446452 |    |            |            |            |
| C  | 2.2940757  | -5.4774643 | -4.9238144 |    |            |            |            |
| H  | 1.7438774  | -6.1813109 | -5.5826197 |    |            |            |            |
| H  | 2.0870459  | -5.3036103 | -1.3169296 |    |            |            |            |
| C  | 2.6356576  | 0.3751784  | -3.8054784 |    |            |            |            |
| H  | 5.3769796  | 0.3276835  | -4.2632732 |    |            |            |            |
| H  | 5.7636673  | -1.1562884 | -3.3274241 |    |            |            |            |
| C  | 3.2051357  | -1.7477371 | -2.4943827 |    |            |            |            |
| C  | 2.0307458  | -4.1207675 | 1.5011886  |    |            |            |            |
| C  | 3.0661364  | -3.4610064 | -0.7260928 |    |            |            |            |
| H  | 5.0471417  | -5.2275778 | 0.0766838  |    |            |            |            |
| H  | 3.5143165  | -6.1455143 | 0.1891388  |    |            |            |            |
| C  | 3.7113260  | -0.4122632 | -3.0376581 |    |            |            |            |
| C  | 3.4252940  | -2.1454183 | -1.1434747 |    |            |            |            |
| C  | 3.3249936  | -4.0002739 | 0.6825914  |    |            |            |            |
| H  | 1.7264995  | 0.5141125  | -3.1891130 |    |            |            |            |
| H  | 1.5724972  | -3.1220507 | 1.6438315  |    |            |            |            |
| H  | 2.3435100  | -0.1361970 | -4.7465749 |    |            |            |            |
| H  | -0.4691271 | -3.5792864 | -3.8669109 |    |            |            |            |
| H  | 1.2987977  | -4.7973263 | 1.0087320  |    |            |            |            |
| H  | 2.7676487  | -4.7087585 | -5.5703076 |    |            |            |            |
| H  | 4.0240439  | 0.2100321  | -2.1750008 |    |            |            |            |
| H  | 3.9582600  | -3.2694586 | 1.2190667  |    |            |            |            |
| H  | 2.3790763  | -2.3138562 | -4.4087576 |    |            |            |            |
| Zn | -2.2183212 | 0.0347281  | -1.7154979 |    |            |            |            |
| Br | -3.9584763 | 1.1627477  | -2.7610881 |    |            |            |            |
| C  | -5.3205587 | -3.3559566 | 2.6408276  |    |            |            |            |
| C  | -4.5073084 | -2.5843582 | 1.8080871  |    |            |            |            |
| C  | -4.9629220 | -1.3245357 | 1.3491000  |    |            |            |            |
| C  | -6.2442608 | -0.8535119 | 1.7291608  |    |            |            |            |
| C  | -7.0570642 | -1.6343039 | 2.5579792  |    |            |            |            |
| C  | -6.5941316 | -2.8832816 | 3.0134758  |    |            |            |            |
| H  | -4.9551409 | -4.3248928 | 3.0121992  |    |            |            |            |
| C  | -4.1442876 | -0.5054272 | 0.4669267  |    |            |            |            |
| H  | -6.5918439 | 0.1254313  | 1.3664334  |    |            |            |            |
| H  | -8.0524370 | -1.2719694 | 2.8547989  |    |            |            |            |
| H  | -7.2323821 | -3.4944254 | 3.6703959  |    |            |            |            |
| O  | -3.0143487 | -0.8436047 | 0.0569728  |    |            |            |            |
| C  | -3.7462407 | -4.6566411 | -1.1384456 |    |            |            |            |
| C  | -2.5196241 | -4.0573043 | -1.2387739 |    |            |            |            |
| C  | -2.7577403 | -2.8019811 | -1.9804752 |    |            |            |            |

### TS1

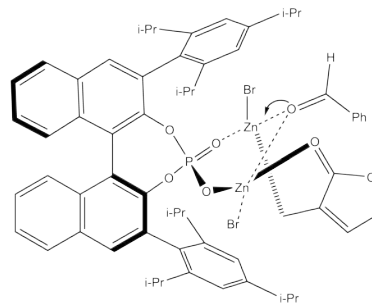

Energy (Hartree) = -11970.02631254  
number of imaginary frequencies: 1

|   |            |            |            |
|---|------------|------------|------------|
| C | 1.1324363  | 2.1053044  | 1.2655660  |
| C | 2.5342331  | 2.1444903  | 1.2978883  |
| C | 3.1756742  | 3.4405276  | 1.3552216  |
| C | 4.5825633  | 3.6266450  | 1.1937657  |
| C | 2.3607733  | 4.6150283  | 1.5505186  |
| C | 2.9852259  | 5.8925028  | 1.6746833  |
| C | 0.9443376  | 4.4926350  | 1.5250626  |
| H | 0.3302514  | 5.4023660  | 1.6082469  |
| C | 0.3130844  | 3.2747644  | 1.2989922  |
| C | 3.8908178  | -1.1565451 | -0.1308797 |
| C | 5.0450019  | -1.3165617 | 0.6287813  |
| H | 5.7354633  | -2.1407102 | 0.3909148  |
| C | 5.3282601  | -0.4869078 | 1.7517371  |
| C | 6.4512133  | -0.7429293 | 2.5947787  |
| C | 4.4369839  | 0.6003973  | 2.0769411  |
| C | 4.6731172  | 1.3299642  | 3.2801517  |
| C | 3.3385308  | 0.8953932  | 1.1868004  |
| C | 3.0699546  | -0.0188071 | 0.1610226  |
| O | 0.4770386  | 0.8803847  | 1.2414591  |
| O | 1.9902049  | 0.2100041  | -0.6839565 |
| P | 0.4689535  | -0.0392569 | -0.1230741 |
| O | -0.4310765 | 0.5763905  | -1.2101393 |
| O | 0.2320097  | -1.4699751 | 0.3234924  |
| C | 4.3595345  | 6.0288185  | 1.5603680  |
| C | 5.1582868  | 4.8855101  | 1.2947123  |
| H | 2.3454645  | 6.7740299  | 1.8384326  |
| H | 4.8290232  | 7.0202939  | 1.6494283  |
| H | 5.2182545  | 2.7586541  | 0.9753418  |
| H | 6.2450376  | 4.9969014  | 1.1598497  |
| C | 5.7596594  | 1.0386675  | 4.0932478  |
| C | 6.6693485  | 0.0067446  | 3.7405882  |
| H | 3.9733272  | 2.1278222  | 3.5650705  |
| H | 5.9135461  | 1.6098503  | 5.0213989  |
| H | 7.5338491  | -0.2082358 | 4.3869724  |
| H | 7.1314058  | -1.5666942 | 2.3266481  |
| C | -1.5384153 | 3.7918462  | -0.2993528 |

|   |            |            |            |    |            |            |            |
|---|------------|------------|------------|----|------------|------------|------------|
| C | -1.1465506 | 3.2513714  | 0.9608156  | H  | 4.0160648  | 0.1988369  | -2.1845876 |
| C | -2.9092946 | 3.9480839  | -0.5648828 | H  | 3.9386121  | -3.2538138 | 1.2328087  |
| C | -2.1299058 | 2.7891467  | 1.8736283  | H  | 2.3875776  | -2.3428630 | -4.4091832 |
| C | -3.4919944 | 2.9610547  | 1.5508656  | Zn | -2.2246057 | 0.0581679  | -1.7160483 |
| C | -3.9037469 | 3.5744355  | 0.3534264  | Br | -3.9759153 | 1.1817332  | -2.7307329 |
| C | -1.7472521 | 2.1571931  | 3.2095628  | C  | -5.3468931 | -3.3542045 | 2.6224320  |
| H | -4.2506536 | 2.6387768  | 2.2832052  | C  | -4.5294421 | -2.5897305 | 1.7865887  |
| C | -2.2223893 | 0.6972246  | 3.3041352  | C  | -4.9641762 | -1.3148293 | 1.3516155  |
| H | -3.3300702 | 0.6226727  | 3.2571036  | C  | -6.2287380 | -0.8216911 | 1.7572298  |
| H | -1.9019425 | 0.2342312  | 4.2592654  | C  | -7.0462054 | -1.5960156 | 2.5871018  |
| H | -1.7988242 | 0.0785423  | 2.4905552  | C  | -6.6037506 | -2.8602946 | 3.0197998  |
| C | -2.2472828 | 2.9981415  | 4.3979099  | H  | -4.9917298 | -4.3323274 | 2.9794185  |
| H | -0.6395603 | 2.1431137  | 3.2645166  | C  | -4.1354047 | -0.4978662 | 0.4740623  |
| H | -3.3562681 | 3.0417880  | 4.4298131  | H  | -6.5568816 | 0.1706491  | 1.4134570  |
| H | -1.8729699 | 4.0404176  | 4.3396973  | H  | -8.0288871 | -1.2162803 | 2.9041192  |
| H | -1.9040895 | 2.5616962  | 5.3585354  | H  | -7.2448923 | -3.4653567 | 3.6796997  |
| C | -5.3613423 | 3.9215550  | 0.0701782  | O  | -3.0180753 | -0.8546959 | 0.0493532  |
| C | -6.3309567 | 2.7446995  | 0.2455971  | C  | -3.7168525 | -4.6534664 | -1.1910095 |
| H | -7.3698445 | 3.0534873  | 0.0086758  | C  | -2.4928552 | -4.0466724 | -1.2831746 |
| H | -6.3323250 | 2.3752229  | 1.2931366  | C  | -2.7378853 | -2.7827006 | -2.0123972 |
| H | -6.0651236 | 1.9098370  | -0.4343953 | O  | -4.0360933 | -2.6518171 | -2.3405019 |
| C | -5.7924481 | 5.1289389  | 0.9254140  | C  | -4.7524664 | -3.8002605 | -1.8460108 |
| H | -5.4108371 | 4.2273115  | -0.9974343 | O  | -1.9056762 | -1.9020351 | -2.2837278 |
| H | -6.8279575 | 5.4444873  | 0.6795646  | C  | -1.1728333 | -4.3348278 | -0.7259970 |
| H | -5.1195382 | 5.9947938  | 0.7641402  | H  | -5.2699984 | -4.2777104 | -2.7078611 |
| H | -5.7602636 | 4.8793584  | 2.0069875  | H  | -5.5350162 | -3.4304389 | -1.1447061 |
| C | -0.5261099 | 4.2207398  | -1.3647878 | Zn | -0.8099954 | -3.0896031 | 0.8266114  |
| C | -0.8043970 | 3.5780506  | -2.7349382 | Br | -1.2935406 | -3.1599886 | 3.1221962  |
| H | -0.0048227 | 3.8530032  | -3.4534472 | H  | -0.3601473 | -4.0682187 | -1.4309558 |
| H | -1.7709940 | 3.9077317  | -3.1673856 | H  | -1.0686554 | -5.3829284 | -0.3872163 |
| H | -0.8297996 | 2.4756898  | -2.6566092 | H  | -3.5368773 | -2.9549829 | 1.4921950  |
| C | -0.4566653 | 5.7547403  | -1.4864445 | H  | -3.9457166 | -5.6024110 | -0.6878670 |
| H | 0.4727167  | 3.8642714  | -1.0417871 | H  | -4.5469434 | 0.4896092  | 0.1537443  |
| H | 0.3036534  | 6.0551742  | -2.2367439 | H  | -3.2219411 | 4.3808660  | -1.5279431 |
| H | -0.1908683 | 6.2336361  | -0.5230843 |    |            |            |            |
| H | -1.4332405 | 6.1726703  | -1.8092413 |    |            |            |            |
| H | 0.9294849  | -5.6595677 | -3.2605922 |    |            |            |            |
| H | 4.7393838  | -1.2865930 | -4.7887729 |    |            |            |            |
| H | 4.3490732  | -5.6282851 | 1.7165591  |    |            |            |            |
| C | 1.3666671  | -4.8540108 | -3.8919868 |    |            |            |            |
| H | 3.0125326  | 1.3539143  | -4.1036521 |    |            |            |            |
| H | -0.4097861 | -4.8734783 | -5.1770789 |    |            |            |            |
| H | 2.2014350  | -4.5147330 | 2.5256429  |    |            |            |            |
| C | 2.1177343  | -3.9220379 | -2.9497134 |    |            |            |            |
| C | 4.9674914  | -0.6567005 | -3.9033554 |    |            |            |            |
| C | 0.2049777  | -4.1447828 | -4.6097294 |    |            |            |            |
| H | 0.5748150  | -3.3925395 | -5.3371423 |    |            |            |            |
| C | 2.5613922  | -2.6557172 | -3.3680463 |    |            |            |            |
| C | 4.0969772  | -5.3149561 | 0.6825415  |    |            |            |            |
| H | 3.1333630  | -6.0729213 | -4.3779781 |    |            |            |            |
| C | 2.4078965  | -4.3113090 | -1.6328970 |    |            |            |            |
| C | 2.3256662  | -5.5187764 | -4.8970611 |    |            |            |            |
| H | 1.7848538  | -6.2303418 | -5.5553199 |    |            |            |            |
| H | 2.0901461  | -5.3132801 | -1.3000396 |    |            |            |            |
| C | 2.6316525  | 0.3515220  | -3.8191449 |    |            |            |            |
| H | 5.3750469  | 0.3083463  | -4.2700118 |    |            |            |            |
| H | 5.7624220  | -1.1692604 | -3.3245027 |    |            |            |            |
| C | 3.2038891  | -1.7626726 | -2.4955512 |    |            |            |            |
| C | 2.0133696  | -4.1109734 | 1.5101405  |    |            |            |            |
| C | 3.0608872  | -3.4643568 | -0.7166298 |    |            |            |            |
| H | 5.0427230  | -5.2167231 | 0.1115226  |    |            |            |            |
| H | 3.5146069  | -6.1398758 | 0.2217779  |    |            |            |            |
| C | 3.7076038  | -0.4288523 | -3.0448142 |    |            |            |            |
| C | 3.4199860  | -2.1515220 | -1.1418680 |    |            |            |            |
| C | 3.3118724  | -3.9916453 | 0.6981400  |    |            |            |            |
| H | 1.7202055  | 0.4917705  | -3.2066783 |    |            |            |            |
| H | 1.5502483  | -3.1133684 | 1.6444314  |    |            |            |            |
| H | 2.3425270  | -0.1647269 | -4.7584578 |    |            |            |            |
| H | -0.4515226 | -3.6120582 | -3.8930462 |    |            |            |            |
| H | 1.2862447  | -4.7936763 | 1.0191588  |    |            |            |            |
| H | 2.8064548  | -4.7565377 | -5.5455964 |    |            |            |            |

### 7.8.5 Pathway 14d-ma ↔ 14j-mi TS1; COSMO

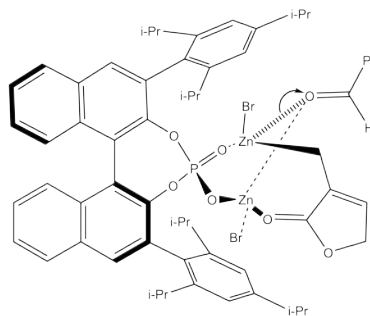

Energy (Hartree) = -11970.03216164

|   |            |            |           |
|---|------------|------------|-----------|
| C | 0.6269973  | 2.1645525  | 1.4127259 |
| C | 1.9765381  | 1.9830327  | 1.7391123 |
| C | 2.7339626  | 3.1487756  | 2.1277478 |
| C | 4.1521843  | 3.1210652  | 2.2887070 |
| C | 2.0460229  | 4.3985217  | 2.3431717 |
| C | 2.7925837  | 5.5461092  | 2.7457127 |
| C | 0.6338447  | 4.4577638  | 2.1633218 |
| H | 0.1040780  | 5.3908332  | 2.4095351 |
| C | -0.0868608 | 3.3728657  | 1.6809430 |
| C | 3.0981622  | -1.5037918 | 0.5594323 |
| C | 3.7889451  | -1.9503192 | 1.6801083 |
| H | 4.2834380  | -2.9329469 | 1.6485412 |
| C | 3.8335076  | -1.1997312 | 2.8885549 |
| C | 4.4623532  | -1.7258824 | 4.0567793 |
| C | 3.1951144  | 0.0922901  | 2.9512402 |
| C | 3.1565618  | 0.7644957  | 4.2091104 |

|   |            |            |            |    |            |            |            |
|---|------------|------------|------------|----|------------|------------|------------|
| C | 2.5829797  | 0.6223788  | 1.7564183  | C  | 4.0631851  | -5.6833118 | -4.3662684 |
| C | 2.5156867  | -0.2035937 | 0.6348399  | H  | 4.0056907  | -6.4075311 | -5.2056678 |
| O | -0.1267655 | 1.1139367  | 0.9149038  | H  | 1.5169168  | -5.2990262 | -1.6950476 |
| O | 1.8681358  | 0.2782361  | -0.5047890 | C  | 3.9168447  | 0.2094457  | -3.0812308 |
| P | 0.2338114  | 0.2941339  | -0.4848117 | H  | 6.5605666  | -0.1618795 | -2.2645556 |
| O | -0.1333060 | 1.0888589  | -1.7526953 | H  | 6.3372266  | -1.7342141 | -1.4261814 |
| O | -0.4149576 | -1.0674271 | -0.2356318 | C  | 3.6103692  | -2.0011412 | -1.8724530 |
| C | 4.1688872  | 5.4811995  | 2.9066534  | C  | -0.0942086 | -4.2572896 | 0.3429915  |
| C | 4.8524300  | 4.2595267  | 2.6640002  | C  | 2.1648986  | -3.5422326 | -0.6028208 |
| H | 2.2525613  | 6.4908114  | 2.9164292  | H  | 3.0952498  | -4.8855965 | 1.6620949  |
| H | 4.7339182  | 6.3754126  | 3.2111723  | H  | 2.0573006  | -6.0311236 | 0.7614241  |
| H | 4.6923420  | 2.1829288  | 2.0976302  | C  | 4.4609128  | -0.7383966 | -1.9969848 |
| H | 5.9472234  | 4.2154508  | 2.7698664  | C  | 2.9507445  | -2.3558466 | -0.6625959 |
| C | 3.7584106  | 0.2160547  | 5.3332521  | C  | 1.3806569  | -3.9398662 | 0.6466025  |
| C | 4.4330022  | -1.0316215 | 5.2566626  | H  | 2.8606161  | 0.4744890  | -2.8794051 |
| H | 2.6246033  | 1.7220404  | 4.2900916  | H  | -0.5593036 | -3.4240781 | -0.2192778 |
| H | 3.7038328  | 0.7498010  | 6.2944569  | H  | 3.9732691  | -0.2509606 | -4.0900207 |
| H | 4.9127918  | -1.4530227 | 6.1532659  | H  | 1.2383792  | -3.7951269 | -5.2522995 |
| H | 4.9548182  | -2.7088569 | 3.9899716  | H  | -0.2137129 | -5.1940893 | -0.2424042 |
| C | -2.2024512 | 3.8407472  | 0.3570979  | H  | 4.8504532  | -4.9407220 | -4.6145186 |
| C | -1.5801361 | 3.3961790  | 1.5540247  | H  | 4.4087862  | -0.1969936 | -1.0309629 |
| C | -3.6069096 | 3.8584623  | 0.2963280  | H  | 1.3705148  | -3.0694720 | 1.3326502  |
| C | -2.3652364 | 2.9414663  | 2.6471854  | H  | 4.0230682  | -2.5791456 | -3.9149227 |
| C | -3.7691506 | 2.9904282  | 2.5389776  | Zn | -1.7346239 | 0.6075398  | -2.7816803 |
| C | -4.4105866 | 3.4530743  | 1.3784669  | Br | -2.5465398 | 1.4190016  | -4.8099872 |
| C | -1.7166265 | 2.4475104  | 3.9409113  | Zn | -1.6302279 | -1.1196813 | 1.4136951  |
| H | -4.3734761 | 2.6487602  | 3.3910265  | Br | -0.2017460 | -1.5991093 | 3.2482777  |
| C | -2.4390836 | 1.2472653  | 4.5699965  | H  | -4.1018783 | 4.1950241  | -0.6280118 |
| H | -3.4550563 | 1.5093984  | 4.9326526  | C  | -0.9881311 | -5.6339492 | -3.5721631 |
| H | -1.8638835 | 0.8698338  | 5.4390005  | C  | -1.1394336 | -4.2647073 | -3.3421011 |
| H | -2.5230683 | 0.4097270  | 3.8506107  | C  | -1.4792142 | -3.4091989 | -4.4183070 |
| C | -1.5803407 | 3.6034053  | 4.9510994  | C  | -1.6548937 | -3.9349689 | -5.7202850 |
| H | -0.6919455 | 2.1016591  | 3.6906843  | C  | -1.4966651 | -5.3078564 | -5.9434449 |
| H | -2.5791349 | 3.9981362  | 5.2336652  | C  | -1.1656215 | -6.1544279 | -4.8696818 |
| H | -0.9925050 | 4.4436704  | 4.5305790  | H  | -0.7238177 | -6.3055424 | -2.7414091 |
| H | -1.0732745 | 3.2600894  | 5.8767241  | C  | -1.6447247 | -1.9769523 | -4.2015103 |
| C | -5.9275933 | 3.5762312  | 1.2701010  | H  | -1.9122935 | -3.2575642 | -6.5499898 |
| C | -6.7029170 | 2.6342356  | 2.2007019  | H  | -1.6284288 | -5.7231527 | -6.9535955 |
| H | -7.7876649 | 2.6647234  | 1.9715546  | H  | -1.0394557 | -7.2339081 | -5.0457503 |
| H | -6.5879175 | 2.9281062  | 3.2646819  | O  | -1.5378697 | -1.4449984 | -3.0822504 |
| H | -6.3556075 | 1.5855129  | 2.1062574  | H  | -0.9875788 | -3.8290095 | -2.3442680 |
| C | -6.3622705 | 5.0393831  | 1.4904142  | H  | -1.8851924 | -1.3422163 | -5.0937360 |
| H | -6.1886080 | 3.3129449  | 0.2189717  | C  | -5.8648083 | -0.4434770 | 0.3642001  |
| H | -7.4573507 | 5.1570222  | 1.3521200  | C  | -4.5060200 | -0.5122532 | 0.4501996  |
| H | -5.8496603 | 5.7239531  | 0.7853807  | C  | -4.0134608 | 0.2210117  | -0.7373442 |
| H | -6.1088434 | 5.3663940  | 2.5206433  | O  | -5.0292215 | 0.7062090  | -1.4741707 |
| C | -1.3656930 | 4.2991649  | -0.8350931 | C  | -6.2685701 | 0.3282990  | -0.8447247 |
| C | -2.0514026 | 4.0505014  | -2.1836528 | O  | -2.8353081 | 0.3898408  | -1.0775449 |
| H | -1.3290704 | 4.1444135  | -3.0181066 | C  | -3.6335317 | -1.1830831 | 1.4597664  |
| H | -2.8718008 | 4.7732546  | -2.3760247 | H  | -6.8647132 | -0.2631741 | -1.5736120 |
| H | -2.4986686 | 3.0392220  | -2.2381355 | H  | -6.8386017 | 1.2545560  | -0.6128534 |
| C | -0.9696260 | 5.7835244  | -0.7092815 | H  | -3.8886619 | -2.2672869 | 1.4783945  |
| H | -0.4333465 | 3.6947144  | -0.8243566 | H  | -3.9226748 | -0.8160434 | 2.4690242  |
| H | -0.3574667 | 6.0988983  | -1.5795221 | H  | -6.5888491 | -0.8902046 | 1.0602260  |
| H | -0.3812731 | 5.9797606  | 0.2072370  |    |            |            |            |
| H | -1.8751825 | 6.4251872  | -0.6770043 |    |            |            |            |
| H | 1.9629906  | -5.7806453 | -3.8917228 |    |            |            |            |
| H | 6.0878015  | -1.6169033 | -3.1960272 |    |            |            |            |
| H | 1.4940249  | -5.3447391 | 2.3226101  |    |            |            |            |
| C | 2.7061434  | -4.9910116 | -4.1392187 |    |            |            |            |
| H | 4.5082884  | 1.1480449  | -3.1107627 |    |            |            |            |
| H | 2.1057553  | -5.0086288 | -6.2481358 |    |            |            |            |
| H | -0.6535972 | -4.3852655 | 1.2925862  |    |            |            |            |
| C | 2.7650307  | -4.0519835 | -2.9405972 |    |            |            |            |
| C | 5.9429652  | -1.0835207 | -2.2331568 |    |            |            |            |
| C | 2.2188414  | -4.2843781 | -5.4150053 |    |            |            |            |
| H | 2.9357411  | -3.5050229 | -5.7477468 |    |            |            |            |
| C | 3.5008732  | -2.8549675 | -2.9846000 |    |            |            |            |
| C | 2.0458216  | -5.1135553 | 1.3879015  |    |            |            |            |
| H | 4.3928730  | -6.2301363 | -3.4598259 |    |            |            |            |
| C | 2.1058610  | -4.3687475 | -1.7415382 |    |            |            |            |

### TS1

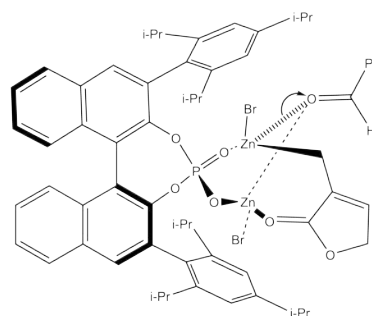

Energy (Hartree) = -11970.01716103  
number of imaginary frequencies: 2

|   |            |            |            |    |            |            |            |
|---|------------|------------|------------|----|------------|------------|------------|
| C | 0.6104381  | 2.1493564  | 1.3956222  | H  | -1.8695813 | 6.3915694  | -0.6990632 |
| C | 1.9596952  | 1.9709390  | 1.7248571  | H  | 1.9990113  | -5.8102984 | -3.8887804 |
| C | 2.7142729  | 3.1386342  | 2.1127826  | H  | 6.0982382  | -1.6264655 | -3.1853681 |
| C | 4.1319520  | 3.1133953  | 2.2763868  | H  | 1.4878781  | -5.3540808 | 2.3200980  |
| C | 2.0244036  | 4.3874987  | 2.3254807  | C  | 2.7423512  | -5.0193853 | -4.1329254 |
| C | 2.7686780  | 5.5360352  | 2.7277816  | H  | 4.5093867  | 1.1344308  | -3.1142552 |
| C | 0.6126519  | 4.4430016  | 2.1444592  | H  | 2.1655986  | -5.0518985 | -6.2492208 |
| H | 0.0789979  | 5.3741696  | 2.3898352  | H  | -0.6543731 | -4.3968095 | 1.2801694  |
| C | -0.1057155 | 3.3561564  | 1.6632010  | C  | 2.7853941  | -4.0734824 | -2.9390175 |
| C | 3.0918911  | -1.5149738 | 0.5544225  | C  | 5.9457315  | -1.0915383 | -2.2245669 |
| C | 3.7828114  | -1.9566034 | 1.6766152  | C  | 2.2668553  | -4.3229541 | -5.4185906 |
| H | 4.2796330  | -2.9380634 | 1.6462837  | H  | 2.9846509  | -3.5434476 | -5.7485921 |
| C | 3.8249321  | -1.2034075 | 2.8830491  | C  | 3.5144229  | -2.8727218 | -2.9836713 |
| C | 4.4553411  | -1.7237098 | 4.0523866  | C  | 2.0428446  | -5.1272456 | 1.3865578  |
| C | 3.1821039  | 0.0863904  | 2.9421300  | H  | 4.4249541  | -6.2475856 | -3.4261700 |
| C | 3.1414204  | 0.7616073  | 4.1980672  | C  | 2.1215641  | -4.3891207 | -1.7425800 |
| C | 2.5688198  | 0.6116481  | 1.7456545  | C  | 4.1038101  | -5.7089014 | -4.3401946 |
| C | 2.5046238  | -0.2169317 | 0.6258172  | H  | 4.0599077  | -6.4386188 | -5.1757192 |
| O | -0.1402725 | 1.0979584  | 0.8959262  | H  | 1.5395465  | -5.3238007 | -1.6941113 |
| O | 1.8600248  | 0.2600261  | -0.5168457 | C  | 3.9197299  | 0.1948364  | -3.0850713 |
| P | 0.2265844  | 0.2806942  | -0.5055763 | H  | 6.5614410  | -0.1686232 | -2.2545637 |
| O | -0.1309161 | 1.0834565  | -1.7709583 | H  | 6.3371655  | -1.7399723 | -1.4146672 |
| O | -0.4306179 | -1.0778352 | -0.2613764 | C  | 3.6149554  | -2.0151974 | -1.8738826 |
| C | 4.1441332  | 5.4734496  | 2.8916563  | C  | -0.0923453 | -4.2706215 | 0.3321250  |
| C | 4.8294213  | 4.2528594  | 2.6519372  | C  | 2.1703378  | -3.5586813 | -0.6064800 |
| H | 2.2268618  | 6.4801404  | 2.8960903  | H  | 3.0913318  | -4.8993340 | 1.6637335  |
| H | 4.7070908  | 6.3688492  | 3.1963374  | H  | 2.0571161  | -6.0467597 | 0.7630051  |
| H | 4.6725443  | 2.1751490  | 2.0879810  | C  | 4.4616290  | -0.7498364 | -1.9972101 |
| H | 5.9239402  | 4.2101157  | 2.7604578  | C  | 2.9514141  | -2.3695955 | -0.6663615 |
| C | 3.7459760  | 0.2185600  | 5.3227823  | C  | 1.3817152  | -3.9547971 | 0.6404436  |
| C | 4.4245466  | -1.0263709 | 5.2497019  | H  | 2.8628837  | 0.4600919  | -2.8877950 |
| H | 2.6054006  | -1.7169653 | 4.2764038  | H  | -0.5544004 | -3.4361602 | -0.2309024 |
| H | 3.6890516  | 0.7545645  | 6.2824875  | H  | 3.9807152  | -0.2664721 | -4.0931978 |
| H | 4.9052654  | -1.4440999 | 6.1474210  | H  | 1.2838721  | -3.8342145 | -5.2704775 |
| H | 4.9495869  | -2.7058845 | 3.9882593  | H  | -0.2115451 | -5.2077915 | -0.2533198 |
| C | -2.2335222 | 3.8178202  | 0.3538670  | H  | 4.8915723  | -4.9652104 | -4.5827456 |
| C | -1.5999275 | 3.3787002  | 1.5468640  | H  | 4.4029332  | -0.2071954 | -1.0323369 |
| C | -3.6383481 | 3.8502466  | 0.3128825  | H  | 1.3682353  | -3.0841935 | 1.3262468  |
| C | -2.3744264 | 2.9379441  | 2.6531251  | H  | 4.0402674  | -2.5970904 | -3.9119565 |
| C | -3.7790360 | 2.9995003  | 2.5633045  | Zn | -1.7362049 | 0.6479545  | -2.8058393 |
| C | -4.4309023 | 3.4630643  | 1.4094357  | Br | -2.5355123 | 1.4046522  | -4.8490695 |
| C | -1.7145879 | 2.4496831  | 3.9434310  | Zn | -1.6221927 | -1.1213519 | 1.4130119  |
| H | -4.3742036 | 2.6706248  | 3.4268964  | Br | -0.2027047 | -1.6188315 | 3.2322514  |
| C | -2.4211781 | 1.2421053  | 4.5763002  | H  | -4.1421327 | 4.1853455  | -0.6072329 |
| H | -3.4415222 | 1.4903953  | 4.9367456  | C  | -0.9518450 | -5.6082203 | -3.5925467 |
| H | -1.8424538 | 0.8754790  | 5.4473407  | C  | -1.1045124 | -4.2389066 | -3.3623580 |
| H | -2.4894494 | 0.3987440  | 3.8623705  | C  | -1.4410173 | -3.3840242 | -4.4393869 |
| C | -1.5844080 | 3.6077707  | 4.9516474  | C  | -1.6096039 | -3.9098514 | -5.7415704 |
| H | -0.6880260 | 2.1136116  | 3.6884939  | C  | -1.4498270 | -5.2823810 | -5.9648401 |
| H | -2.5849596 | 3.9938925  | 5.2394353  | C  | -1.1237391 | -6.1288581 | -4.8899340 |
| H | -1.0070211 | 4.4532319  | 4.5274364  | H  | -0.6894042 | -6.2777050 | -2.7595912 |
| H | -1.0692834 | 3.2704649  | 5.8748570  | C  | -1.6135001 | -1.9505956 | -4.2198875 |
| C | -5.9471089 | 3.6125931  | 1.3250320  | H  | -1.8633770 | -3.2318557 | -6.5720650 |
| C | -6.7245773 | 2.6743026  | 2.2576828  | H  | -1.5760478 | -5.6973640 | -6.9758193 |
| H | -7.8125606 | 2.7250694  | 2.0475209  | H  | -0.9961527 | -7.2081922 | -5.0658949 |
| H | -6.5887232 | 2.9555126  | 3.3224400  | O  | -1.5210480 | -1.4238659 | -3.0992434 |
| H | -6.3950934 | 1.6211841  | 2.1492357  | H  | -0.9559058 | -3.8034275 | -2.3637665 |
| C | -6.3532472 | 5.0804806  | 1.5660167  | H  | -1.8487366 | -1.3099733 | -5.1108535 |
| H | -6.2285951 | 3.3648057  | 0.2749504  | C  | -5.8619480 | -0.3846242 | 0.3810189  |
| H | -7.4479500 | 5.2202768  | 1.4463533  | C  | -4.5038490 | -0.4687667 | 0.4563086  |
| H | -5.8381090 | 5.7625288  | 0.8607406  | C  | -4.0134153 | 0.2540673  | -0.7418480 |
| H | -6.0770377 | 5.3926938  | 2.5947054  | O  | -5.0330793 | 0.7514796  | -1.4686843 |
| C | -1.4090048 | 4.2538941  | -0.8552507 | C  | -6.2676079 | 0.3947546  | -0.8243100 |
| C | -2.1236855 | 4.0149443  | -2.1905604 | O  | -2.8399966 | 0.4009388  | -1.0985398 |
| H | -1.4155667 | 4.0887593  | -3.0387818 | C  | -3.6301969 | -1.1387527 | 1.4636931  |
| H | -2.9305568 | 4.7553914  | -2.3730421 | H  | -6.8846433 | -0.1833397 | -1.5473276 |
| H | -2.5980019 | 3.0150912  | -2.2352369 | H  | -6.8171243 | 1.3309004  | -0.5808175 |
| C | -0.9792080 | 5.7300023  | -0.7454005 | H  | -3.9137484 | -2.2147393 | 1.5136719  |
| H | -0.4896151 | 3.6298467  | -0.8589623 | H  | -3.8956363 | -0.7411346 | 2.4681720  |
| H | -0.3776856 | 6.0271262  | -1.6291458 | H  | -6.5825835 | -0.8198545 | 1.0877657  |
| H | -0.3678214 | 5.9181641  | 0.1573158  |    |            |            |            |

## TS2; COSMO

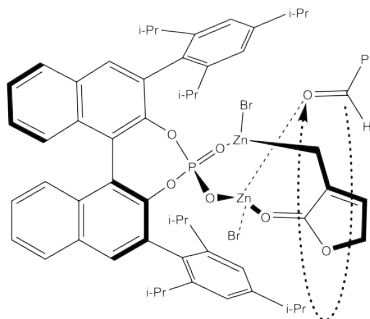

Energy (Hartree) = -11970.02141558

|   |            |            |           |
|---|------------|------------|-----------|
| C | 0.7375829  | 2.1222528  | 2.0458738 |
| C | 2.0909038  | 2.1001292  | 1.7056403 |
| C | 2.7120684  | 3.3544273  | 1.3528527 |
| C | 4.0341822  | 3.4472310  | 0.8256868 |
| C | 1.9467916  | 4.5705851  | 1.4936067 |
| C | 2.5619037  | 5.8201653  | 1.1816386 |
| C | 0.5733727  | 4.5089782  | 1.8708592 |
| H | 0.0039466  | 5.4478808  | 1.9360285 |
| C | -0.0755416 | 3.2999660  | 2.0884991 |
| C | 3.0125858  | -1.5018941 | 0.6902457 |
| C | 4.2706321  | -1.6312921 | 1.2629730 |
| H | 4.8620800  | -2.5400451 | 1.0730266 |
| C | 4.8092640  | -0.6270479 | 2.1187364 |
| C | 6.0607439  | -0.8156657 | 2.7787884 |
| C | 4.0661166  | 0.5896908  | 2.3473850 |
| C | 4.5892569  | 1.5318399  | 3.2843723 |
| C | 2.8191946  | 0.7981976  | 1.6492276 |
| C | 2.3087702  | -0.2744094 | 0.9031753 |
| O | 0.1231197  | 0.9122577  | 2.3630472 |
| O | 1.0877461  | -0.1565743 | 0.2550679 |
| P | -0.3390773 | -0.0062400 | 1.0918931 |
| O | -1.2233863 | 0.7713357  | 0.0982009 |
| O | -0.8109488 | -1.3245704 | 1.6802840 |
| C | 3.8637142  | 5.8776441  | 0.7066993 |
| C | 4.5964178  | 4.6769909  | 0.5107326 |
| H | 1.9703120  | 6.7410400  | 1.3055500 |
| H | 4.3223926  | 6.8479750  | 0.4621722 |
| H | 4.6079577  | 2.5263616  | 0.6545758 |
| H | 5.6164387  | 4.7196686  | 0.0988929 |
| C | 5.7999395  | 1.3093475  | 3.9261420 |
| C | 6.5529202  | 0.1340180  | 3.6616862 |
| H | 4.0134213  | 2.4414430  | 3.5046061 |
| H | 6.1759111  | 2.0482280  | 4.6502947 |
| H | 7.5156855  | -0.0278265 | 4.1700694 |
| H | 6.6216020  | -1.7434748 | 2.5843669 |
| C | -2.4018122 | 3.4254662  | 1.1118930 |
| C | -1.5589423 | 3.1416339  | 2.2277184 |
| C | -3.7630561 | 3.0758503  | 1.1897198 |
| C | -2.1129199 | 2.5421738  | 3.3955516 |
| C | -3.4720808 | 2.1852022  | 3.4041543 |
| C | -4.3124392 | 2.4210030  | 2.3023525 |
| C | -1.2793064 | 2.3060794  | 4.6533833 |
| H | -3.8821260 | 1.6865653  | 4.2960608 |
| C | -1.4204708 | 0.8803437  | 5.2118675 |
| H | -2.4409238 | 0.6853732  | 5.6015540 |
| H | -0.7137480 | 0.7253267  | 6.0531295 |
| H | -1.2116146 | 0.1199557  | 4.4350648 |
| C | -1.6211731 | 3.3671667  | 5.7180611 |
| H | -0.2132996 | 2.4539953  | 4.3855331 |
| H | -2.6825760 | 3.2853004  | 6.0340360 |
| H | -1.4646826 | 4.3942373  | 5.3294297 |
| H | -0.9876399 | 3.2391110  | 6.6205170 |
| C | -5.7553262 | 1.9339528  | 2.2864196 |
| C | -5.8208642 | 0.3997815  | 2.4012795 |
| H | -6.8630722 | 0.0357700  | 2.2845249 |

|    |            |            |            |
|----|------------|------------|------------|
| H  | -5.4452795 | 0.0432429  | 3.3819398  |
| H  | -5.1923210 | -0.0920214 | 1.6301077  |
| C  | -6.6101513 | 2.6188826  | 3.3672992  |
| H  | -6.1779624 | 2.2179730  | 1.2962956  |
| H  | -7.6656976 | 2.2800399  | 3.3131308  |
| H  | -6.5947470 | 3.7217865  | 3.2542498  |
| H  | -6.2348989 | 2.3789317  | 4.3841824  |
| C  | -1.8748537 | 4.0373879  | -0.1854967 |
| C  | -2.4860663 | 3.4093691  | -1.4513053 |
| H  | -1.8932106 | 3.6914289  | -2.3450307 |
| H  | -3.5298403 | 3.7439014  | -1.6293486 |
| H  | -2.5225000 | 2.3028513  | -1.3813588 |
| C  | -2.0799648 | 5.5643660  | -0.2131170 |
| H  | -0.7847677 | 3.8388463  | -0.2293719 |
| H  | -1.6389230 | 6.0046137  | -1.1317018 |
| H  | -1.6145265 | 6.0615009  | 0.6604017  |
| H  | -3.1617714 | 5.8154995  | -0.1980267 |
| H  | -0.4548068 | -5.9238830 | -2.0820218 |
| H  | 4.6118261  | -2.8090900 | -3.4066783 |
| H  | 2.6328575  | -4.5459541 | 3.6104194  |
| C  | 0.1695289  | -5.2894033 | -2.7492373 |
| H  | 3.3385899  | 0.1095770  | -3.8192833 |
| H  | -1.4403618 | -5.1537479 | -4.2382519 |
| H  | 0.0908483  | -4.3536484 | 3.4990174  |
| C  | 0.9893002  | -4.3746391 | -1.8477428 |
| C  | 4.7492429  | -2.0073480 | -2.6507234 |
| C  | -0.7856758 | -4.4797203 | -3.6473517 |
| H  | -0.2249481 | -3.8443258 | -4.3648826 |
| C  | 1.8226578  | -3.3846433 | -2.3919362 |
| C  | 2.6952677  | -4.4922918 | 2.5038957  |
| H  | 1.7310824  | -6.8277878 | -2.9328540 |
| C  | 0.9103078  | -4.4723199 | -0.4479495 |
| C  | 1.0631294  | -6.2260104 | -3.5816919 |
| H  | 0.4504896  | -6.9247149 | -4.1886595 |
| H  | 0.2710959  | -5.2577361 | -0.0166601 |
| C  | 2.7060694  | -0.7100030 | -3.4217391 |
| H  | 5.4119656  | -1.2325054 | -3.0891466 |
| H  | 5.2715113  | -2.4535654 | -1.7801248 |
| C  | 2.5102430  | -2.4634264 | -1.5834989 |
| C  | 0.1926901  | -4.4183438 | 2.3981020  |
| C  | 1.5896217  | -3.5850073 | 0.4092290  |
| H  | 3.6524409  | -4.0039113 | 2.2421963  |
| H  | 2.7266266  | -5.5302888 | 2.1111420  |
| C  | 3.3939721  | -1.4036873 | -2.2373372 |
| C  | 2.3787830  | -2.5534243 | -0.1719080 |
| C  | 1.4815092  | -3.7341662 | 1.9275153  |
| H  | 1.7503990  | -0.2562402 | -3.0970884 |
| H  | -0.7024212 | -3.9410682 | 1.9491652  |
| H  | 2.4948819  | -1.4086655 | -4.2577278 |
| H  | -1.4263271 | -3.8054683 | -3.0447130 |
| H  | 0.1580303  | -5.4916658 | 2.1198312  |
| H  | 1.7042903  | -5.6485089 | -4.2805645 |
| H  | 3.5969219  | -0.6183997 | -1.4800428 |
| H  | 1.4835367  | -2.7083573 | 2.3539110  |
| H  | 1.9141623  | -3.3036533 | -3.4862765 |
| Zn | -0.4695877 | 0.8894774  | -1.7596204 |
| Br | 1.2422696  | 2.4856460  | -2.0057551 |
| Zn | -2.4352999 | -2.5065378 | 1.6906572  |
| Br | -3.4201831 | -2.4646434 | 3.7996958  |
| H  | -4.4171425 | 3.2746160  | 0.3255059  |
| C  | -1.3688300 | -1.9291896 | -7.1443887 |
| C  | -1.3239562 | -1.0959513 | -6.0240899 |
| C  | -0.3022991 | -0.1207145 | -5.9158192 |
| C  | 0.6695495  | 0.0086396  | -6.9351246 |
| C  | 0.6144760  | -0.8245379 | -8.0593316 |
| C  | -0.4020559 | -1.7914212 | -8.1613337 |
| H  | -2.1534058 | -2.6957480 | -7.2318511 |
| C  | -0.2008205 | 0.7091143  | -4.7183215 |
| H  | 1.4671940  | 0.7615764  | -6.8327122 |
| H  | 1.3667319  | -0.7284622 | -8.8563519 |
| H  | -0.4398523 | -2.4514050 | -9.0417970 |

|   |            |            |            |
|---|------------|------------|------------|
| O | -1.0334731 | 0.6625679  | -3.7961934 |
| H | -2.0563380 | -1.1847057 | -5.2076784 |
| H | 0.6879341  | 1.3852766  | -4.6258805 |
| C | -4.6211545 | -1.5664316 | -0.9888936 |
| C | -3.3549780 | -2.0832526 | -0.8960645 |
| C | -2.4835165 | -1.1214612 | -1.6106321 |
| O | -3.2123598 | -0.0873294 | -2.0895394 |
| C | -4.5906006 | -0.2631659 | -1.7107883 |
| O | -1.2534456 | -1.1512455 | -1.7743066 |
| C | -2.8093260 | -3.2278883 | -0.1566695 |
| H | -5.2105439 | -0.2204898 | -2.6331606 |
| H | -4.8770335 | 0.6005183  | -1.0674949 |
| H | -1.8453605 | -3.5731426 | -0.5781684 |
| H | -3.5282000 | -4.0642942 | -0.0676913 |
| H | -5.5345396 | -1.9877585 | -0.5473711 |

## TS2

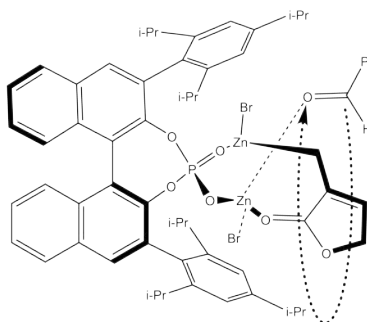

Energy (Hartree) = -11970.00805933  
 number of imaginary frequencies: 1

|   |            |            |           |
|---|------------|------------|-----------|
| C | 0.7347918  | 2.1211234  | 2.0385304 |
| C | 2.0871844  | 2.1007714  | 1.6942215 |
| C | 2.7070132  | 3.3561311  | 1.3433536 |
| C | 4.0272589  | 3.4507170  | 0.8124228 |
| C | 1.9424725  | 4.5716947  | 1.4918006 |
| C | 2.5572453  | 5.8217014  | 1.1831207 |
| C | 0.5705568  | 4.5079077  | 1.8730795 |
| H | 0.0003960  | 5.4458955  | 1.9440015 |
| C | -0.0784600 | 3.2984931  | 2.0873104 |
| C | 3.0022652  | -1.5026396 | 0.6789968 |
| C | 4.2594158  | -1.6348385 | 1.2525736 |
| H | 4.8463216  | -2.5470123 | 1.0647977 |
| C | 4.8021967  | -0.6304758 | 2.1050584 |
| C | 6.0533393  | -0.8203728 | 2.7642522 |
| C | 4.0629739  | 0.5889078  | 2.3310333 |
| C | 4.5900957  | 1.5319576  | 3.2644111 |
| C | 2.8155662  | 0.7991518  | 1.6344895 |
| C | 2.3022684  | -0.2727709 | 0.8898568 |
| O | 0.1219250  | 0.9109837  | 2.3551593 |
| O | 1.0803847  | -0.1537750 | 0.2433829 |
| P | -0.3432829 | -0.0070930 | 1.0864647 |
| O | -1.2328687 | 0.7718738  | 0.0964540 |
| O | -0.8168088 | -1.3252776 | 1.6712495 |
| C | 3.8570329  | 5.8808973  | 0.7045458 |
| C | 4.5884557  | 4.6814307  | 0.5012889 |
| H | 1.9659714  | 6.7420151  | 1.3121856 |
| H | 4.3148168  | 6.8521291  | 0.4623209 |
| H | 4.5994717  | 2.5299673  | 0.6360448 |
| H | 5.6069514  | 4.7253967  | 0.0860410 |
| C | 5.8008684  | 1.3080586  | 3.9044799 |
| C | 6.5496892  | 0.1301800  | 3.6429450 |
| H | 4.0165989  | 2.4434853  | 3.4819550 |
| H | 6.1799223  | 2.0482664  | 4.6255627 |
| H | 7.5125529  | -0.0332340 | 4.1505148 |

|   |            |            |            |
|---|------------|------------|------------|
| H | 6.6108351  | -1.7507395 | 2.5724083  |
| C | -2.4049103 | 3.4296390  | 1.1137717  |
| C | -1.5616066 | 3.1396121  | 2.2273254  |
| C | -3.7662939 | 3.0817911  | 1.1913987  |
| C | -2.1147074 | 2.5336963  | 3.3920520  |
| C | -3.4736810 | 2.1768914  | 3.3990840  |
| C | -4.3153058 | 2.4213673  | 2.3006224  |
| C | -1.2813286 | 2.2922054  | 4.6488847  |
| H | -3.8822909 | 1.6716055  | 4.2877518  |
| C | -1.4210866 | 0.8644918  | 5.2022735  |
| H | -2.4407623 | 0.6651438  | 5.5913854  |
| H | -0.7146948 | 0.7075008  | 6.0431953  |
| H | -1.2097677 | 0.1053590  | 4.4252818  |
| C | -1.6252325 | 3.3496881  | 5.7164414  |
| H | -0.2154129 | 2.4425913  | 4.3819158  |
| H | -2.6866762 | 3.2660631  | 6.0312593  |
| H | -1.4701926 | 4.3781948  | 5.3315235  |
| H | -0.9927717 | 3.2192631  | 6.6191961  |
| C | -5.7616634 | 1.9445515  | 2.2879324  |
| C | -5.8432684 | 0.4130559  | 2.4220713  |
| H | -6.8884241 | 0.0573070  | 2.3061984  |
| H | -5.4761015 | 0.0627140  | 3.4078980  |
| H | -5.2153595 | -0.0963750 | 1.6620805  |
| C | -6.6112291 | 2.6521993  | 3.3583121  |
| H | -6.1805453 | 2.2215844  | 1.2936826  |
| H | -7.6700248 | 2.3229723  | 3.3088621  |
| H | -6.5841542 | 3.7531379  | 3.2312341  |
| H | -6.2382332 | 2.4225413  | 4.3781748  |
| C | -1.8776895 | 4.0468979  | -0.1810739 |
| C | -2.4885053 | 3.4250370  | -1.4499636 |
| H | -1.8942495 | 3.7093030  | -2.3419813 |
| H | -3.5318270 | 3.7613809  | -1.6280695 |
| H | -2.5274093 | 2.3180723  | -1.3840436 |
| C | -2.0817124 | 5.5738804  | -0.2032139 |
| H | -0.7876808 | 3.8481589  | -0.2268669 |
| H | -1.6398695 | 6.0179933  | -1.1194347 |
| H | -1.6169475 | 6.0668463  | 0.6727558  |
| H | -3.1631201 | 5.8260824  | -0.1860569 |
| H | -0.4374989 | -5.9596373 | -2.0754324 |
| H | 4.6005187  | -2.7887972 | -3.3994740 |
| H | 2.6641503  | -4.5960847 | 3.5821020  |
| C | 0.1674070  | -5.3096985 | -2.7457602 |
| H | 3.2877021  | 0.1151630  | -3.8358659 |
| H | -1.4590476 | -5.1940065 | -4.2189238 |
| H | 0.1279040  | -4.3675048 | 3.5118550  |
| C | 0.9816477  | -4.3860488 | -1.8482545 |
| C | 4.7217507  | -1.9786784 | -2.6498533 |
| C | -0.8140358 | -4.5120957 | -3.6262430 |
| H | -0.2733079 | -3.8566269 | -4.3412548 |
| C | 1.7990175  | -3.3854530 | -2.3971063 |
| C | 2.7094262  | -4.5350677 | 2.4752433  |
| H | 1.7559695  | -6.8155011 | -2.9588362 |
| C | 0.9146797  | -4.4869927 | -0.4485889 |
| C | 1.0669877  | -6.2246933 | -3.5952190 |
| H | 0.4605479  | -6.9326551 | -4.1976338 |
| H | 0.2879299  | -5.2799945 | -0.0127750 |
| C | 2.6662763  | -0.7143998 | -3.4416930 |
| H | 5.3768465  | -1.1983727 | -3.0900061 |
| H | 5.2445785  | -2.4108873 | -1.7728485 |
| C | 2.4837503  | -2.4593513 | -1.5927136 |
| C | 0.2059099  | -4.4126888 | 2.4081513  |
| C | 1.5917656  | -3.5946190 | 0.4048539  |
| H | 3.6709100  | -4.0618069 | 2.2017184  |
| H | 2.7168412  | -5.5701694 | 2.0740724  |
| C | 3.3557571  | -1.3914206 | -2.2489824 |
| C | 2.3656583  | -2.5544753 | -0.1803609 |
| C | 1.5011046  | -3.7508049 | 1.9233865  |
| H | 1.7008155  | -0.2760929 | -3.1252221 |
| H | -0.6844818 | -3.9010469 | 1.9906334  |
| H | 2.4738543  | -1.4194246 | -4.2770748 |
| H | -1.4647326 | -3.8602509 | -3.0100112 |

|    |            |            |            |
|----|------------|------------|------------|
| H  | 0.1380990  | -5.4794285 | 2.1113164  |
| H  | 1.6878085  | -5.6321114 | -4.2996088 |
| H  | 3.5429490  | -0.5977058 | -1.4965096 |
| H  | 1.5288576  | -2.7283922 | 2.3567273  |
| H  | 1.8808195  | -3.3016871 | -3.4920060 |
| Zn | -0.4917629 | 0.9163217  | -1.7566475 |
| Br | 1.2247177  | 2.4908783  | -2.0425434 |
| Zn | -2.4523633 | -2.4968123 | 1.7056975  |
| Br | -3.4638500 | -2.4503773 | 3.7867859  |
| H  | -4.4219968 | 3.2898671  | 0.3304159  |
| C  | -1.2591736 | -1.9813804 | -7.1364640 |
| C  | -1.2523426 | -1.1389387 | -6.0221003 |
| C  | -0.2711099 | -0.1241360 | -5.9158783 |
| C  | 0.6995678  | 0.0346590  | -6.9307871 |
| C  | 0.6825848  | -0.8071498 | -8.0496817 |
| C  | -0.2946959 | -1.8131215 | -8.1500457 |
| H  | -2.0115844 | -2.7799862 | -7.2201860 |
| C  | -0.2091679 | 0.1760578  | -4.7196037 |
| H  | 1.4683986  | 0.8170378  | -6.8278101 |
| H  | 1.4349616  | -0.6878068 | -8.8435015 |
| H  | -0.3018889 | -2.4803653 | -9.0258635 |
| O  | -1.0478647 | 0.6441638  | -3.8075339 |
| H  | -1.9812544 | -1.2502976 | -5.2054145 |
| H  | 0.6558858  | 1.4222236  | -4.6182237 |
| C  | -4.6182477 | -1.5462116 | -0.9430727 |
| C  | -3.3548241 | -2.0755204 | -0.8745978 |
| C  | -2.4866733 | -1.1144817 | -1.5964406 |
| O  | -3.2166171 | -0.0706030 | -2.0573134 |
| C  | -4.5863747 | -0.2333339 | -1.6489065 |
| O  | -1.2610366 | -1.1486717 | -1.7804275 |
| C  | -2.8060832 | -3.2246291 | -0.1491070 |
| H  | -5.2265015 | -0.1674950 | -2.5567223 |
| H  | -4.8435716 | 0.6247518  | -0.9853107 |
| H  | -1.8396955 | -3.5630110 | -0.5696738 |
| H  | -3.5224280 | -4.0629589 | -0.0607240 |
| H  | -5.5251684 | -1.9614004 | -0.4831349 |

|   |            |            |            |
|---|------------|------------|------------|
| O | 0.3092685  | 0.8118241  | 1.3378708  |
| O | 2.0400171  | 0.0272762  | -0.3536135 |
| P | 0.4183126  | -0.0001665 | -0.0855173 |
| O | -0.1497764 | 0.8231014  | -1.2463572 |
| O | -0.1215842 | -1.3926486 | 0.1922983  |
| C | 4.2677154  | 5.8638586  | 1.9540141  |
| C | 5.0557788  | 4.6939327  | 1.7871287  |
| H | 2.2593612  | 6.6665453  | 2.0662468  |
| H | 4.7549298  | 6.8460944  | 2.0506043  |
| H | 5.0810549  | 2.5543068  | 1.5374526  |
| H | 6.1524317  | 4.7756891  | 1.7383301  |
| C | 5.1570999  | 0.9311471  | 4.8588144  |
| C | 6.0332096  | -0.1746030 | 4.6930831  |
| H | 3.5360829  | 2.0893107  | 4.0340835  |
| H | 5.2239289  | 1.5506196  | 5.7662642  |
| H | 6.7860904  | -0.3996662 | 5.4638447  |
| H | 6.5747906  | -1.8576875 | 3.4426350  |
| C | -1.8901009 | 3.6851893  | 0.1356125  |
| C | -1.3113195 | 3.1234726  | 1.3125557  |
| C | -3.2851413 | 3.6168380  | -0.0266772 |
| C | -2.1416533 | 2.4892608  | 2.2753634  |
| C | -3.5330454 | 2.4474904  | 2.0595459  |
| C | -4.1311344 | 3.0137360  | 0.9231934  |
| C | -1.5865130 | 1.8916247  | 3.5665963  |
| H | -4.1632843 | 1.9597771  | 2.8173971  |
| C | -1.9272566 | 0.3984062  | 3.7039781  |
| H | -3.0215383 | 0.2295155  | 3.7822975  |
| H | -1.4630981 | -0.0258211 | 4.6182393  |
| H | -1.5597697 | -0.1845922 | 2.8384646  |
| C | -2.0560679 | 2.7001164  | 4.7911546  |
| H | -0.4816933 | 1.9757922  | 3.5336823  |
| H | -3.1594059 | 2.6556754  | 4.9070616  |
| H | -1.7701123 | 3.7683286  | 4.7035361  |
| H | -1.6049024 | 2.2980070  | 5.7219728  |
| C | -5.6427377 | 3.0469790  | 0.7150451  |
| C | -6.4125330 | 2.0114948  | 1.5428388  |
| H | -7.4811941 | 1.9961127  | 1.2480430  |
| H | -6.3750816 | 2.2491596  | 2.6264628  |
| H | -6.0062906 | 0.9901690  | 1.4055570  |
| C | -6.1871203 | 4.4668905  | 0.9728027  |
| H | -5.8196346 | 2.8167657  | -0.3606870 |
| H | -7.2755435 | 4.5207609  | 0.7617150  |
| H | -5.6763333 | 5.2210074  | 0.3410082  |
| H | -6.0288620 | 4.7554747  | 2.0331061  |
| C | -1.0506892 | 4.3793315  | -0.9383164 |
| C | -1.4275677 | 3.9597014  | -2.3673027 |
| H | -0.7035852 | 4.3714213  | -3.0986990 |
| H | -2.4343827 | 4.3238003  | -2.6610971 |
| H | -1.4212924 | 2.8616555  | -2.4799303 |
| C | -1.1344979 | 5.9124404  | -0.7997799 |
| H | 0.0043474  | 4.0762595  | -0.7806900 |
| H | -0.4903377 | 6.4111931  | -1.5533889 |
| H | -0.8177019 | 6.2598496  | 0.2031861  |
| H | -2.1763483 | 6.2629453  | -0.9578032 |
| H | 1.2337560  | -5.7999977 | -3.1093850 |
| H | 5.4037267  | -1.6077793 | -3.9426946 |
| H | 3.3792418  | -5.8091486 | 2.5407294  |
| C | 1.8911146  | -5.0715675 | -3.6346756 |
| H | 3.7398332  | 1.0832453  | -3.5747027 |
| H | 0.5244781  | -5.0618968 | -5.3471265 |
| H | 1.2563315  | -4.4037428 | 2.8219860  |
| C | 2.4439491  | -4.1358767 | -2.5665542 |
| C | 5.5168191  | -0.9941829 | -3.0243207 |
| C | 1.0323307  | -4.3372640 | -4.6782996 |
| H | 1.6479868  | -3.6741086 | -5.3206821 |
| C | 3.0099609  | -2.8933094 | -2.8975401 |
| C | 3.3855065  | -5.5398661 | 1.4645555  |
| H | 3.6116198  | -6.4426486 | -3.5589148 |
| C | 2.4250993  | -4.5040201 | -1.2110224 |
| C | 3.0250538  | -5.8702437 | -4.3056112 |
| H | 2.6214592  | -6.5862716 | -5.0516389 |

### TS3; COSMO

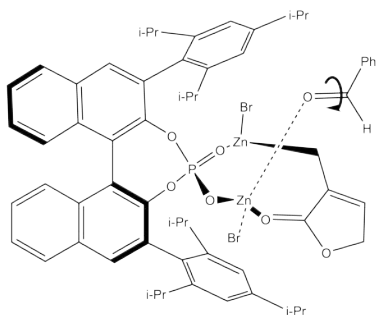

Energy (Hartree) = -11970.03967537

|   |           |            |           |
|---|-----------|------------|-----------|
| C | 0.9777491 | 2.0221985  | 1.4791741 |
| C | 2.3703254 | 2.0231855  | 1.6306461 |
| C | 3.0359524 | 3.3032431  | 1.7236785 |
| C | 4.4558596 | 3.4466795  | 1.6767307 |
| C | 2.2368566 | 4.4999400  | 1.8337070 |
| C | 2.8846384 | 5.7649502  | 1.9692773 |
| C | 0.8179462 | 4.4076886  | 1.7617578 |
| H | 0.2232401 | 5.3282741  | 1.8575552 |
| C | 0.1692697 | 3.2013686  | 1.5262120 |
| C | 3.7571194 | -1.3926627 | 0.5220592 |
| C | 4.7721090 | -1.5833522 | 1.4526968 |
| H | 5.4387295 | -2.4544743 | 1.3546214 |
| C | 4.9433814 | -0.7095809 | 2.5652851 |
| C | 5.9210317 | -0.9803544 | 3.5698003 |
| C | 4.0890466 | 0.4461780  | 2.7051098 |
| C | 4.2115280 | 1.2348027  | 3.8885663 |
| C | 3.1366854 | 0.7443356  | 1.6604677 |
| C | 2.9621740 | -0.2085468 | 0.6503140 |



|    |            |            |            |
|----|------------|------------|------------|
| H  | 1.9965457  | -5.4827735 | -0.9392576 |
| C  | 3.2490918  | 0.1233204  | -3.3132955 |
| H  | 6.0256731  | -0.0499660 | -3.3094203 |
| H  | 6.1812060  | -1.5480002 | -2.3299544 |
| C  | 3.4960986  | -2.0075427 | -1.9214525 |
| C  | 1.3428442  | -4.0588759 | 1.7714750  |
| C  | 2.9022509  | -3.6597017 | -0.1897580 |
| H  | 4.4327276  | -5.5897674 | 1.1030702  |
| H  | 2.8073043  | -6.3204259 | 0.9277436  |
| C  | 4.1480230  | -0.7027202 | -2.3776153 |
| C  | 3.4149035  | -2.3787781 | -0.5483226 |
| C  | 2.7910538  | -4.1362608 | 1.2606672  |
| H  | 2.2800563  | 0.3621631  | -2.8355610 |
| H  | 0.9753568  | -3.0126196 | 1.7447736  |
| H  | 3.0363140  | -0.4045094 | -4.2656458 |
| H  | 0.2617754  | -3.7033874 | -4.1958012 |
| H  | 0.6726245  | -4.7104382 | 1.1662766  |
| H  | 3.7253108  | -5.1885269 | -4.8326941 |
| H  | 4.3444271  | -0.0858031 | -1.4775344 |
| H  | 3.3771772  | -3.4433228 | 1.8934816  |
| H  | 3.0669647  | -2.5933093 | -3.9551189 |
| Zn | -0.8941984 | 0.3480273  | -2.9874880 |
| Br | -0.3006224 | 1.2017613  | -5.0474001 |
| Zn | -1.1090271 | -3.1113033 | 0.3718743  |
| Br | -2.3140803 | -3.2081349 | 2.3928088  |
| H  | -3.7367880 | 4.0552517  | -0.9319199 |
| C  | -5.1178576 | -1.6863634 | 0.3874141  |
| C  | -4.2995028 | -0.8517153 | -0.3778252 |
| C  | -4.8775724 | 0.0087406  | -1.3428948 |
| C  | -6.2801283 | 0.0400880  | -1.5189117 |
| C  | -7.0957909 | -0.8085566 | -0.7592617 |
| C  | -6.5135560 | -1.6704232 | 0.1882798  |
| H  | -4.6586884 | -2.3471057 | 1.1401401  |
| C  | -4.0228776 | 0.8257008  | -2.2045283 |
| H  | -6.7203241 | 0.7217727  | -2.2641736 |
| H  | -8.1870959 | -0.7962639 | -0.8984924 |
| H  | -7.1552330 | -2.3324735 | 0.7900202  |
| O  | -2.7986935 | 0.6833410  | -2.2542191 |
| H  | -3.2071965 | -0.8416543 | -0.2366985 |
| H  | -4.5293229 | 1.5872361  | -2.8545008 |
| C  | -3.5620078 | -4.0704552 | -2.4084657 |
| C  | -2.2758087 | -3.6837780 | -2.1422257 |
| C  | -2.1109360 | -2.3854528 | -2.8271173 |
| O  | -3.2318335 | -2.0262356 | -3.4772783 |
| C  | -4.2329857 | -3.0461326 | -3.2599857 |
| O  | -1.0954407 | -1.6709955 | -2.8245888 |
| C  | -1.2022664 | -4.2237973 | -1.3040395 |
| H  | -4.5610324 | -3.4182135 | -4.2554246 |
| H  | -5.1074505 | -2.5588132 | -2.7724547 |
| H  | -0.2088892 | -4.0718834 | -1.7692075 |
| H  | -1.3551201 | -5.2876196 | -1.0426637 |
| H  | -4.0654752 | -4.9788123 | -2.0515985 |

|   |            |            |            |
|---|------------|------------|------------|
| C | 3.0223060  | 3.2978799  | 1.7218162  |
| C | 4.4417523  | 3.4441260  | 1.6785404  |
| C | 2.2210916  | 4.4926766  | 1.8338916  |
| C | 2.8665558  | 5.7576568  | 1.9752448  |
| C | 0.8029186  | 4.3976464  | 1.7585056  |
| H | 0.2051049  | 5.3160016  | 1.8559788  |
| C | 0.1567681  | 3.1913349  | 1.5174364  |
| C | 3.7552928  | -1.3960286 | 0.5172681  |
| C | 4.7707343  | -1.5826947 | 1.4478870  |
| H | 5.4393677  | -2.4522245 | 1.3488514  |
| C | 4.9391282  | -0.7088000 | 2.5603834  |
| C | 5.9170880  | -0.9752925 | 3.5650385  |
| C | 4.0805653  | 0.4436195  | 2.6998515  |
| C | 4.1996796  | 1.2321025  | 3.8834158  |
| C | 3.1281976  | 0.7394398  | 1.6545352  |
| C | 2.9567458  | -0.2143138 | 0.6446096  |
| O | 0.3001226  | 0.8036236  | 1.3243464  |
| O | 2.0362196  | 0.0173441  | -0.3608845 |
| P | 0.4136333  | -0.0069278 | -0.0993635 |
| O | -0.1475099 | 0.8190297  | -1.2611295 |
| O | -0.1325700 | -1.3975163 | 0.1754177  |
| C | 4.2488993  | 5.8591863  | 1.9639859  |
| C | 5.0389121  | 4.6916242  | 1.7950706  |
| H | 2.2392624  | 6.6577210  | 2.0731927  |
| H | 4.7339719  | 6.8419590  | 2.0650827  |
| H | 5.0679937  | 2.5528525  | 1.5378752  |
| H | 6.1354922  | 4.7751849  | 1.7492804  |
| C | 5.1460734  | 0.9322098  | 4.8533599  |
| C | 6.0262140  | -0.1695848 | 4.6879397  |
| H | 3.5206926  | 2.0838263  | 4.0277799  |
| H | 5.2101324  | 1.5519888  | 5.7607139  |
| H | 6.7798731  | -0.3919112 | 5.4586441  |
| H | 6.5741242  | -1.8501842 | 3.4379408  |
| C | -1.9021862 | 3.6825182  | 0.1290403  |
| C | -1.3236454 | 3.1135231  | 1.3024184  |
| C | -3.2980639 | 3.6227571  | -0.0291638 |
| C | -2.1542634 | 2.4769071  | 2.2633646  |
| C | -3.5462521 | 2.4440640  | 2.0511632  |
| C | -4.1446671 | 3.0215645  | 0.9211102  |
| C | -1.5998675 | 1.8683965  | 3.5497277  |
| H | -4.1762243 | 1.9557848  | 2.8087377  |
| C | -1.9466988 | 0.3758385  | 3.6783390  |
| H | -3.0412534 | 0.2093185  | 3.7576417  |
| H | -1.4832593 | -0.0570820 | 4.5884950  |
| H | -1.5816868 | -0.2046539 | 2.8102180  |
| C | -2.0637517 | 2.6719414  | 4.7795699  |
| H | -0.4948647 | 1.9481067  | 3.5157046  |
| H | -3.1669197 | 2.6321942  | 4.8978433  |
| H | -1.7736739 | 3.7393252  | 4.6978721  |
| H | -1.6132633 | 2.2622136  | 5.7072291  |
| C | -5.6571887 | 3.0717683  | 0.7227820  |
| C | -6.4331532 | 2.0447449  | 1.5553452  |
| H | -7.5040112 | 2.0401141  | 1.2680282  |
| H | -6.3871711 | 2.2835822  | 2.6382310  |
| H | -6.0384793 | 1.0189927  | 1.4185062  |
| C | -6.1839733 | 4.4972262  | 0.9855170  |
| H | -5.8445985 | 2.8439439  | -0.3520994 |
| H | -7.2731992 | 4.5648958  | 0.7826303  |
| H | -5.6683204 | 5.2466049  | 0.3523882  |
| H | -6.0140892 | 4.7826396  | 2.0445964  |
| C | -1.0619970 | 4.3760156  | -0.9448346 |
| C | -1.4422464 | 3.9612594  | -2.3742787 |
| H | -0.7179690 | 4.3694894  | -3.1069061 |
| H | -2.4473566 | 4.3313283  | -2.6670766 |
| H | -1.4404522 | 2.8637815  | -2.4911407 |
| C | -1.1399131 | 5.9090224  | -0.8032185 |
| H | -0.0078944 | 4.0685864  | -0.7896033 |
| H | -0.4953909 | 6.4068924  | -1.5568921 |
| H | -0.8204175 | 6.2538952  | 0.1995992  |
| H | -2.1804604 | 6.2644355  | -0.9582365 |
| H | 1.2571906  | -5.8237066 | -3.1079122 |

### TS3

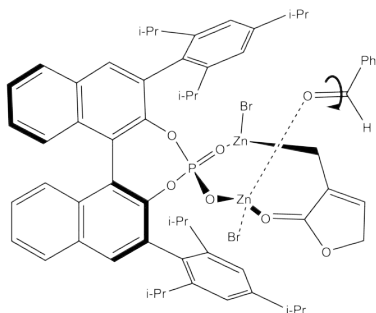

Energy (Hartree) = -11970.0260692  
number of imaginary frequencies: 1

|   |           |           |           |
|---|-----------|-----------|-----------|
| C | 0.9671795 | 2.0137080 | 1.4692892 |
| C | 2.3593658 | 2.0167968 | 1.6243815 |

|    |            |            |            |
|----|------------|------------|------------|
| H  | 5.4037530  | -1.6137804 | -3.9454968 |
| H  | 3.3859491  | -5.8035275 | 2.5501184  |
| C  | 1.9130276  | -5.0937163 | -3.6332955 |
| H  | 3.7264571  | 1.0728410  | -3.5859563 |
| H  | 0.5543279  | -5.0998974 | -5.3524033 |
| H  | 1.2529036  | -4.4035400 | 2.8196829  |
| C  | 2.4560773  | -4.1509576 | -2.5663236 |
| C  | 5.5128417  | -0.9971363 | -3.0288321 |
| C  | 1.0539755  | -4.3696033 | -4.6836004 |
| H  | 1.6670377  | -3.7046454 | -5.3263724 |
| C  | 3.0148950  | -2.9060362 | -2.8992390 |
| C  | 3.3939078  | -5.5373892 | 1.4731950  |
| H  | 3.6421683  | -6.4526930 | -3.5438865 |
| C  | 2.4365240  | -4.5153185 | -1.2100435 |
| C  | 3.0548722  | -5.8880302 | -4.2956057 |
| H  | 2.6604759  | -6.6098125 | -5.0409607 |
| H  | 2.0123124  | -5.4955483 | -0.9365932 |
| C  | 3.2408050  | 0.1112180  | -3.3224775 |
| H  | 6.0183493  | -0.0520334 | -3.3165313 |
| H  | 6.1786270  | -1.5468085 | -2.3327842 |
| C  | 3.4962619  | -2.0157247 | -1.9252254 |
| C  | 1.3434699  | -4.0643046 | 1.7677761  |
| C  | 2.9075295  | -3.6662241 | -0.1903689 |
| H  | 4.4419065  | -5.5847723 | 1.1140372  |
| H  | 2.8217228  | -6.3235174 | 0.9381006  |
| C  | 4.1423312  | -0.7091205 | -2.3844291 |
| C  | 3.4159968  | -2.3845914 | -0.5516052 |
| C  | 2.7934144  | -4.1376272 | 1.2615937  |
| H  | 2.2711226  | 0.3493866  | -2.8460366 |
| H  | 0.9712896  | -3.0198405 | 1.7356260  |
| H  | 3.0293408  | -0.4173695 | -4.2745764 |
| H  | 0.2764292  | -3.7392161 | -4.2080845 |
| H  | 0.6771015  | -4.7211055 | 1.1641820  |
| H  | 3.7536798  | -5.2041364 | -4.8213991 |
| H  | 4.3357072  | -0.0894441 | -1.4856015 |
| H  | 3.3744141  | -3.4392654 | 1.8932684  |
| H  | 3.0706806  | -2.6073148 | -3.9571710 |
| Zn | -0.8631042 | 0.3653847  | -3.0201903 |
| Br | -0.3066107 | 1.2220649  | -5.0748325 |
| Zn | -1.1090680 | -3.1226511 | 0.3696734  |
| Br | -2.3295425 | -3.2361329 | 2.3667074  |
| H  | -3.7493662 | 4.0707736  | -0.9300470 |
| C  | -5.0951223 | -1.6694135 | 0.4065380  |
| C  | -4.2769741 | -0.8357889 | -0.3609405 |
| C  | -4.8552443 | 0.0315368  | -1.3187729 |
| C  | -6.2580743 | 0.0704555  | -1.4866761 |
| C  | -7.0741068 | -0.7775242 | -0.7269893 |
| C  | -6.4911172 | -1.6455327 | 0.2144084  |
| H  | -4.6310620 | -2.3341925 | 1.1535789  |
| C  | -3.9980938 | 0.8479328  | -2.1819585 |
| H  | -6.6989302 | 0.7588317  | -2.2256798 |
| H  | -8.1661976 | -0.7584753 | -0.8598484 |
| H  | -7.1332304 | -2.3058187 | 0.8177700  |
| O  | -2.7798479 | 0.6875494  | -2.2528269 |
| H  | -3.1839781 | -0.8330027 | -0.2248862 |
| H  | -4.5037266 | 1.6275440  | -2.8135276 |
| C  | -3.5454773 | -4.0611308 | -2.3966525 |
| C  | -2.2550571 | -3.6764455 | -2.1471399 |
| C  | -2.0987447 | -2.3733288 | -2.8296124 |
| O  | -3.2325741 | -2.0111736 | -3.4603693 |
| C  | -4.2291493 | -3.0299629 | -3.2313358 |
| O  | -1.0852593 | -1.6605702 | -2.8407131 |
| C  | -1.1724219 | -4.2158506 | -1.3251282 |
| H  | -4.5750256 | -3.3949962 | -4.2241414 |
| H  | -5.0943474 | -2.5436927 | -2.7253824 |
| H  | -0.1815041 | -4.0377752 | -1.7852540 |
| H  | -1.3088883 | -5.2849191 | -1.0771876 |
| H  | -4.0424611 | -4.9705342 | -2.0339594 |

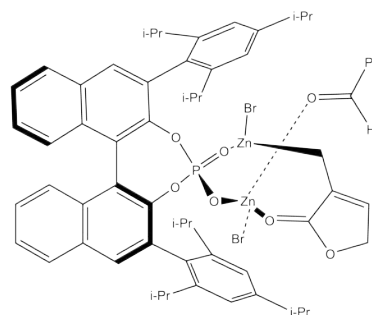

Energy (Hartree) = -11970.03532891

|   |            |            |            |
|---|------------|------------|------------|
| C | 1.0124667  | 2.1360800  | 1.6834219  |
| C | 2.3688352  | 1.9924854  | 1.3857381  |
| C | 3.1377785  | 3.1900485  | 1.1552212  |
| C | 4.4825288  | 3.1672239  | 0.6791246  |
| C | 2.5138648  | 4.4701137  | 1.3920161  |
| C | 3.2768124  | 5.6607782  | 1.1970241  |
| C | 1.1457889  | 4.5301862  | 1.7882348  |
| H | 0.6995873  | 5.5159025  | 1.9841840  |
| C | 0.3575846  | 3.3898501  | 1.8949606  |
| C | 2.9741142  | -1.6832245 | 0.4147001  |
| C | 4.1261906  | -1.9621405 | 1.1412668  |
| H | 4.6039602  | -2.9473970 | 1.0279082  |
| C | 4.6960986  | -1.0208398 | 2.0436056  |
| C | 5.8313094  | -1.3575691 | 2.8410973  |
| C | 4.0989101  | 0.2859819  | 2.1758910  |
| C | 4.6346914  | 1.1725674  | 3.1593759  |
| C | 2.9682008  | 0.6282850  | 1.3447548  |
| C | 2.4128211  | -0.3768028 | 0.5415337  |
| O | 0.2500775  | 0.9857459  | 1.8510420  |
| O | 1.2841849  | -0.0954324 | -0.2288510 |
| P | -0.1648493 | 0.1269750  | 0.5230584  |
| O | -1.0246508 | 0.9629867  | -0.4340584 |
| O | -0.7631202 | -1.1745562 | 1.0557040  |
| C | 4.5904228  | 5.6031081  | 0.7552056  |
| C | 5.1908628  | 4.3449244  | 0.4816239  |
| H | 2.7934377  | 6.6314927  | 1.3899010  |
| H | 5.1640273  | 6.5299015  | 0.6016775  |
| H | 4.9547195  | 2.1995679  | 0.4578283  |
| H | 6.2243288  | 4.3028567  | 0.1049502  |
| C | 5.7277425  | 0.8084239  | 3.9337439  |
| C | 6.3446167  | -0.4602261 | 3.7650889  |
| H | 4.1636731  | 2.1530172  | 3.3122550  |
| H | 6.1151384  | 1.5083083  | 4.6898883  |
| H | 7.2159380  | -0.7337948 | 4.3794463  |
| H | 6.2819429  | -2.3549653 | 2.7176355  |
| C | -2.0229007 | 3.9566411  | 1.2334061  |
| C | -1.1121647 | 3.4001834  | 2.1792214  |
| C | -3.4051074 | 3.8229586  | 1.4705168  |
| C | -1.6101071 | 2.7610603  | 3.3519496  |
| C | -2.9989731 | 2.6635547  | 3.5390699  |
| C | -3.9165806 | 3.1710590  | 2.6042238  |
| C | -0.6895118 | 2.2216489  | 4.4461875  |
| H | -3.3750694 | 2.1607642  | 4.4433043  |
| C | -0.9919836 | 0.7576310  | 4.8091164  |
| H | -1.9891284 | 0.6458827  | 5.2828377  |
| H | -0.2394382 | 0.3770849  | 5.5304302  |
| H | -0.9760088 | 0.1082865  | 3.9131707  |
| C | -0.7437206 | 3.1357947  | 5.6858991  |
| H | 0.3522378  | 2.2604394  | 4.0693106  |
| H | -1.7621888 | 3.1509042  | 6.1278161  |
| H | -0.4731708 | 4.1805119  | 5.4293505  |
| H | -0.0412899 | 2.7798292  | 6.4681989  |
| C | -5.4182313 | 3.0395406  | 2.8221864  |
| C | -5.8398147 | 1.5907654  | 3.1220637  |
| H | -6.9456459 | 1.4956236  | 3.1356442  |

int1; COSMO

|    |            |            |            |   |            |            |            |
|----|------------|------------|------------|---|------------|------------|------------|
| H  | -5.4677965 | 1.2561591  | 4.1119263  | O | -1.2407458 | -0.7192540 | -3.2908951 |
| H  | -5.4303649 | 0.8775015  | 2.3786051  | H | -2.7033043 | -2.7227374 | -3.9670832 |
| C  | -5.9080071 | 4.0030525  | 3.9195481  | H | 0.0293006  | -0.1998181 | -4.8017425 |
| H  | -5.9057386 | 3.3515681  | 1.8700038  | C | -5.7270603 | -0.0459658 | -0.3458304 |
| H  | -7.0089401 | 3.9375740  | 4.0456711  | C | -4.5052442 | -0.2685755 | -0.9224747 |
| H  | -5.6483484 | 5.0538294  | 3.6794004  | C | -4.1878991 | 0.9829043  | -1.6523478 |
| H  | -5.4406704 | 3.7551803  | 4.8956489  | O | -5.1652627 | 1.8939297  | -1.4944393 |
| C  | -1.5540644 | 4.7114747  | -0.0106598 | C | -6.2023218 | 1.3254126  | -0.6735762 |
| C  | -2.3825945 | 4.4060730  | -1.2664542 | O | -3.2197341 | 1.2611927  | -2.3794719 |
| H  | -1.9009578 | 4.8464122  | -2.1621167 | C | -3.6061689 | -1.4341710 | -0.8801425 |
| H  | -3.4117736 | 4.8165540  | -1.2048254 | H | -7.1528302 | 1.3542314  | -1.2510192 |
| H  | -2.4742928 | 3.3191562  | -1.4386125 | H | -6.3297916 | 1.9793991  | 0.2172850  |
| C  | -1.5451147 | 6.2319370  | 0.2492037  | H | -2.8371550 | -1.3909721 | -1.6736485 |
| H  | -0.5136942 | 4.3905340  | -0.2253577 | H | -4.1748037 | -2.3823535 | -0.9653344 |
| H  | -1.1434564 | 6.7791799  | -0.6288134 | H | -6.2903296 | -0.7484903 | 0.2833922  |
| H  | -0.9353653 | 6.5053643  | 1.1327494  |   |            |            |            |
| H  | -2.5765289 | 6.5981127  | 0.4369940  |   |            |            |            |
| H  | 0.7545766  | -6.7941043 | -2.4134581 |   |            |            |            |
| H  | 4.5789432  | -2.6874827 | -4.0804790 |   |            |            |            |
| H  | 1.6994292  | -4.6161551 | 3.4108825  |   |            |            |            |
| C  | 1.1513574  | -6.0044304 | -3.0889987 |   |            |            |            |
| H  | 3.2490029  | 0.1701939  | -3.8145943 |   |            |            |            |
| H  | -0.3323728 | -6.4452010 | -4.6532781 |   |            |            |            |
| H  | -0.7281257 | -3.9749718 | 2.6339999  |   |            |            |            |
| C  | 1.5706427  | -4.8391915 | -2.2004704 |   |            |            |            |
| C  | 4.8226733  | -2.0544461 | -3.2016062 |   |            |            |            |
| C  | 0.0127571  | -5.5899571 | -4.0352439 |   |            |            |            |
| H  | 0.3426451  | -4.7870069 | -4.7267558 |   |            |            |            |
| C  | 2.3135603  | -3.7569706 | -2.7048773 |   |            |            |            |
| C  | 2.0472260  | -4.6232610 | 2.3570258  |   |            |            |            |
| H  | 3.1531917  | -6.9122866 | -3.1848780 |   |            |            |            |
| C  | 1.1975139  | -4.8049430 | -0.8464580 |   |            |            |            |
| C  | 2.3324115  | -6.6096959 | -3.8660761 |   |            |            |            |
| H  | 2.0093433  | -7.5053727 | -4.4359602 |   |            |            |            |
| H  | 0.5879234  | -5.6322504 | -0.4491222 |   |            |            |            |
| C  | 2.6800061  | -0.6937205 | -3.4139537 |   |            |            |            |
| H  | 5.4253805  | -1.1979649 | -3.5680379 |   |            |            |            |
| H  | 5.4582710  | -2.6558630 | -2.5203025 |   |            |            |            |
| C  | 2.7412461  | -2.6989863 | -1.8813244 |   |            |            |            |
| C  | -0.3429196 | -4.2304629 | 1.6266535  |   |            |            |            |
| C  | 1.5777778  | -3.7587005 | 0.0152881  |   |            |            |            |
| H  | 3.0888814  | -4.2468040 | 2.3411840  |   |            |            |            |
| H  | 2.0629888  | -5.6780152 | 2.0099053  |   |            |            |            |
| C  | 3.5546997  | -1.5567496 | -2.4870527 |   |            |            |            |
| C  | 2.3954525  | -2.7180383 | -0.5033228 |   |            |            |            |
| C  | 1.1178864  | -3.7704826 | 1.4726080  |   |            |            |            |
| H  | 1.8034630  | -0.2898536 | -2.8710793 |   |            |            |            |
| H  | -0.9959581 | -3.7323306 | 0.8827202  |   |            |            |            |
| H  | 2.3147120  | -1.2870965 | -4.2796375 |   |            |            |            |
| H  | -0.8572430 | -5.2017562 | -3.4697195 |   |            |            |            |
| H  | -0.4520931 | -5.3272657 | 1.4941824  |   |            |            |            |
| H  | 2.7513811  | -5.8876079 | -4.5979123 |   |            |            |            |
| H  | 3.8880510  | -0.9040931 | -1.6543096 |   |            |            |            |
| H  | 1.1648638  | -2.7235539 | 1.8356565  |   |            |            |            |
| H  | 2.5891043  | -3.7426526 | -3.7717025 |   |            |            |            |
| Zn | -1.2002215 | 1.1399910  | -2.3594462 |   |            |            |            |
| Br | 0.1348781  | 2.5222904  | -3.6702861 |   |            |            |            |
| Zn | -2.7377698 | -1.5108784 | 0.9337897  |   |            |            |            |
| Br | -3.6825459 | -1.8248867 | 3.0478399  |   |            |            |            |
| H  | -4.1160700 | 4.2286057  | 0.7331424  |   |            |            |            |
| C  | -2.5004241 | -3.9668715 | -5.7498084 |   |            |            |            |
| C  | -2.1501838 | -2.9158064 | -4.8987070 |   |            |            |            |
| C  | -1.0697258 | -2.0666219 | -5.2428943 |   |            |            |            |
| C  | -0.3424931 | -2.2876778 | -6.4368141 |   |            |            |            |
| C  | -0.6867300 | -3.3552819 | -7.2743320 |   |            |            |            |
| C  | -1.7672009 | -4.1885955 | -6.9319847 |   |            |            |            |
| H  | -3.3425405 | -4.6267095 | -5.4927671 |   |            |            |            |
| C  | -0.7195792 | -0.9291305 | -4.4021736 |   |            |            |            |
| H  | 0.4917477  | -1.6168005 | -6.6966281 |   |            |            |            |
| H  | -0.1199889 | -3.5375923 | -8.1993419 |   |            |            |            |
| H  | -2.0431462 | -5.0227700 | -7.5953105 |   |            |            |            |

### int1

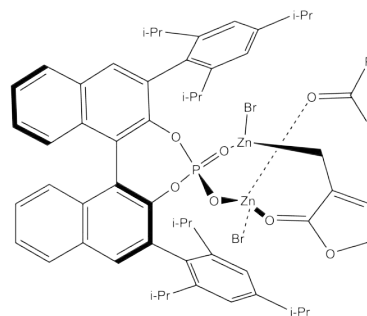

Energy (Hartree) = -11970.02149192

|   |            |            |            |
|---|------------|------------|------------|
| C | 1.0027634  | 2.1327823  | 1.6791915  |
| C | 2.3593710  | 1.9900365  | 1.3818682  |
| C | 3.1284701  | 3.1880178  | 1.1545808  |
| C | 4.4740206  | 3.1662438  | 0.6814438  |
| C | 2.5041179  | 4.4675248  | 1.3922716  |
| C | 3.2675093  | 5.6577729  | 1.2002796  |
| C | 1.1359196  | 4.5261233  | 1.7869567  |
| H | 0.6874885  | 5.5107097  | 1.9835668  |
| C | 0.3477335  | 3.3858916  | 1.8919757  |
| C | 2.9611725  | -1.6843325 | 0.4059590  |
| C | 4.1117378  | -1.9657359 | 1.1336882  |
| H | 4.5863275  | -2.9523957 | 1.0188108  |
| C | 4.6829559  | -1.0267590 | 2.0370560  |
| C | 5.8168714  | -1.3651479 | 2.8347597  |
| C | 4.0879067  | 0.2807462  | 2.1697790  |
| C | 4.6248391  | 1.1657869  | 3.1536328  |
| C | 2.9582275  | 0.6257334  | 1.3385750  |
| C | 2.4018379  | -0.3771771 | 0.5332333  |
| O | 0.2403924  | 0.9826496  | 1.8457881  |
| O | 1.2741894  | -0.0931627 | -0.2372230 |
| P | -0.1747061 | 0.1238475  | 0.5183703  |
| O | -1.0396426 | 0.9574699  | -0.4365224 |
| O | -0.7648839 | -1.1814324 | 1.0490014  |
| C | 4.5816545  | 5.6011395  | 0.7617831  |
| C | 5.1825610  | 4.3439230  | 0.4880493  |
| H | 2.7831777  | 6.6280465  | 1.3927841  |
| H | 5.1552205  | 6.5282909  | 0.6107292  |
| H | 4.9458724  | 2.1985341  | 0.4602215  |
| H | 6.2169002  | 4.3023337  | 0.1139051  |
| C | 5.7170328  | 0.7996894  | 3.9274204  |
| C | 6.3315242  | -0.4694325 | 3.7587207  |
| H | 4.1548703  | 2.1467319  | 3.3057090  |
| H | 6.1054160  | 1.4988346  | 4.6836517  |
| H | 7.2021020  | -0.7449254 | 4.3731772  |
| H | 6.2654514  | -2.3634741 | 2.7114103  |
| C | -2.0326801 | 3.9524936  | 1.2331993  |

|   |            |            |            |    |            |            |            |
|---|------------|------------|------------|----|------------|------------|------------|
| C | -1.1213169 | 3.3978242  | 2.1788641  | H  | 3.8881089  | -0.9073766 | -1.6561124 |
| C | -3.4141314 | 3.8321684  | 1.4797727  | H  | 1.1374139  | -2.7227075 | 1.8160570  |
| C | -1.6166869 | 2.7665940  | 3.3564791  | H  | 2.6033579  | -3.7466298 | -3.7800896 |
| C | -3.0049930 | 2.6800118  | 3.5513934  | Zn | -1.2079626 | 1.1525065  | -2.3600986 |
| C | -3.9237663 | 3.1926093  | 2.6211252  | Br | 0.1203551  | 2.4938724  | -3.7051360 |
| C | -0.6942501 | 2.2234366  | 4.4471316  | Zn | -2.7389991 | -1.5278211 | 0.9496607  |
| H | -3.3790389 | 2.1823192  | 4.4590516  | Br | -3.7388023 | -1.7672568 | 3.0354079  |
| C | -1.0019380 | 0.7609824  | 4.8117030  | H  | -4.1256250 | 4.2396633  | 0.7437684  |
| H | -1.9980129 | 0.6517068  | 5.2878936  | C  | -2.4585032 | -3.9649954 | -5.7844998 |
| H | -0.2491989 | 0.3769886  | 5.5307174  | C  | -2.1206630 | -2.9180661 | -4.9237235 |
| H | -0.9910127 | 0.1099037  | 3.9171430  | C  | -1.0454669 | -2.0586498 | -5.2545610 |
| C | -0.7386915 | 3.1390161  | 5.6860091  | C  | -0.3111671 | -2.2649456 | -6.4454988 |
| H | 0.3460946  | 2.2574210  | 4.0658064  | C  | -0.6424945 | -3.3280838 | -7.2938802 |
| H | -1.7549283 | 3.1601450  | 6.1324486  | C  | -1.7180188 | -4.1721452 | -6.9646703 |
| H | -0.4647222 | 4.1822021  | 5.4275441  | H  | -3.2967053 | -4.6334717 | -5.5376930 |
| H | -0.0351904 | 2.7803721  | 6.4660080  | C  | -0.7099286 | -0.9232979 | -4.3992912 |
| C | -5.4252285 | 3.0854318  | 2.8542420  | H  | 0.5197466  | -1.5854954 | -6.6938461 |
| C | -5.8656929 | 1.6547782  | 3.2086159  | H  | -0.0692739 | -3.4986362 | -8.2171904 |
| H | -6.9726709 | 1.5742514  | 3.2263757  | H  | -1.9838115 | -5.0031789 | -7.6360279 |
| H | -5.5006849 | 1.3538637  | 4.2117118  | O  | -1.2383725 | -0.7318477 | -3.2910062 |
| H | -5.4635045 | 0.9052189  | 2.4974616  | H  | -2.6778783 | -2.7344230 | -3.9924715 |
| C | -5.8935329 | 4.0952521  | 3.9189058  | H  | 0.0308811  | -0.1783127 | -4.7872690 |
| H | -5.9156392 | 3.3715211  | 1.8947335  | C  | -5.6968139 | -0.0846847 | -0.2835523 |
| H | -6.9939829 | 4.0497839  | 4.0576593  | C  | -4.4951520 | -0.3163626 | -0.8983991 |
| H | -5.6210155 | 5.1326184  | 3.6389599  | C  | -4.1864890 | 0.9358623  | -1.6327023 |
| H | -5.4197617 | 3.8770845  | 4.8987500  | O  | -5.1536275 | 1.8542196  | -1.4458253 |
| C | -1.5648008 | 4.6880602  | -0.0227698 | C  | -6.1658827 | 1.2943271  | -0.5915772 |
| C | -2.3975806 | 4.3655383  | -1.2715261 | C  | -3.2331190 | 1.2068403  | -2.3789883 |
| H | -1.9121568 | 4.7786897  | -2.1778205 | O  | -3.5985375 | -1.4820122 | -0.8753136 |
| H | -3.4225218 | 4.7876787  | -1.2191895 | H  | -7.1367576 | 1.3399083  | -1.1342173 |
| H | -2.5039357 | 3.2762930  | -1.4192132 | H  | -6.2507787 | 1.9445491  | 0.3074655  |
| C | -1.5503893 | 6.2121160  | 0.2128079  | H  | -2.8353155 | -1.4357972 | -1.6737772 |
| H | -0.5259781 | 4.3611961  | -0.2359129 | H  | -4.1660991 | -2.4314797 | -0.9489000 |
| H | -1.1526675 | 6.7445284  | -0.6759161 | H  | -6.2366018 | -0.7799765 | 0.3735565  |
| H | -0.9349100 | 6.4977937  | 1.0883802  |    |            |            |            |
| H | -2.5791865 | 6.5846224  | 0.4017985  |    |            |            |            |
| H | 0.7615045  | -6.7975735 | -2.4301680 |    |            |            |            |
| H | 4.5857552  | -2.6843808 | -4.0853393 |    |            |            |            |
| H | 1.6588092  | -4.6156302 | 3.3955303  |    |            |            |            |
| C | 1.1674190  | -6.0108519 | -3.1038523 |    |            |            |            |
| H | 3.2561660  | 0.1729065  | -3.8176884 |    |            |            |            |
| H | -0.2934570 | -6.4603841 | -4.6879685 |    |            |            |            |
| H | -0.7660155 | -3.9639354 | 2.5956648  |    |            |            |            |
| C | 1.5745142  | -4.8416478 | -2.2147874 |    |            |            |            |
| C | 4.8261186  | -2.0546688 | -3.2031578 |    |            |            |            |
| C | 0.0419744  | -5.6024838 | -4.0680735 |    |            |            |            |
| H | 0.3802252  | -4.8014924 | -4.7578685 |    |            |            |            |
| C | 2.3188626  | -3.7590834 | -2.7155507 |    |            |            |            |
| C | 2.0170076  | -4.6206881 | 2.3453435  |    |            |            |            |
| H | 3.1703679  | -6.9173058 | -3.1654089 |    |            |            |            |
| C | 1.1916309  | -4.8058460 | -0.8640308 |    |            |            |            |
| C | 2.3597297  | -6.6197752 | -3.8603501 |    |            |            |            |
| H | 2.0468250  | -7.5186340 | -4.4308789 |    |            |            |            |
| H | 0.5808347  | -5.6333924 | -0.4692004 |    |            |            |            |
| C | 2.6857189  | -0.6903407 | -3.4180356 |    |            |            |            |
| H | 5.4320576  | -1.1984210 | -3.5645723 |    |            |            |            |
| H | 5.4578827  | -2.6601678 | -2.5222563 |    |            |            |            |
| C | 2.7399233  | -2.6999855 | -1.8904783 |    |            |            |            |
| C | -0.3679588 | -4.2301764 | 1.5962061  |    |            |            |            |
| C | 1.5646885  | -3.7585763 | -0.0006799 |    |            |            |            |
| H | 3.0571864  | -4.2402845 | 2.3410522  |    |            |            |            |
| H | 2.0404049  | -5.6749756 | 1.9975060  |    |            |            |            |
| C | 3.5565371  | -1.5574721 | -2.4915261 |    |            |            |            |
| C | 2.3852005  | -2.7181555 | -0.5148549 |    |            |            |            |
| C | 1.0940007  | -3.7695562 | 1.4530889  |    |            |            |            |
| H | 1.8102158  | -0.2831383 | -2.8761411 |    |            |            |            |
| H | -1.0129348 | -3.7432733 | 0.8376569  |    |            |            |            |
| H | 2.3194129  | -1.2824068 | -4.2845723 |    |            |            |            |
| H | -0.8361735 | -5.2137475 | -3.5157722 |    |            |            |            |
| H | -0.4747096 | -5.3286633 | 1.4756781  |    |            |            |            |
| H | 2.7899970  | -5.9011320 | -4.5888750 |    |            |            |            |

### int2; COSMO

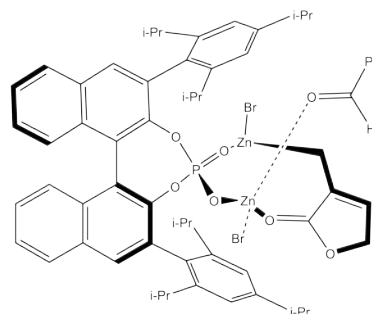

Energy (Hartree) = -11970.0434656

|   |           |            |           |
|---|-----------|------------|-----------|
| C | 1.0758725 | 2.0708232  | 1.5280401 |
| C | 2.4740100 | 2.0413110  | 1.5961552 |
| C | 3.1729677 | 3.3052702  | 1.5640291 |
| C | 4.5913365 | 3.4027572  | 1.4341467 |
| C | 2.4094969 | 4.5289650  | 1.6313194 |
| C | 3.0962208 | 5.7805753  | 1.6359776 |
| C | 0.9860090 | 4.4730452  | 1.6544172 |
| H | 0.4204202 | 5.4151582  | 1.7158199 |
| C | 0.2968703 | 3.2705098  | 1.5527655 |
| C | 3.6190940 | -1.5344591 | 0.7411287 |
| C | 4.6409194 | -1.7182985 | 1.6659293 |
| H | 5.2202543 | -2.6543043 | 1.6491239 |
| C | 4.9224369 | -0.7556846 | 2.6772487 |
| C | 5.9106535 | -1.0078660 | 3.6763957 |
| C | 4.1661442 | 0.4737262  | 2.7256191 |
| C | 4.3911490 | 1.3586899  | 3.8232965 |
| C | 3.1967800 | 0.7395119  | 1.6881024 |
| C | 2.9288125 | -0.2833441 | 0.7705784 |
| O | 0.3705034 | 0.8750163  | 1.5035906 |

|   |            |            |            |    |            |            |            |
|---|------------|------------|------------|----|------------|------------|------------|
| O | 1.9816736  | -0.0720939 | -0.2184363 | C  | 3.0350018  | -0.4784519 | -3.2118444 |
| P | 0.3788955  | -0.0531687 | 0.1524374  | H  | 5.8178722  | -0.6156545 | -3.2881339 |
| O | -0.2635172 | 0.6672085  | -1.0408533 | H  | 6.0240348  | -2.0107962 | -2.1757293 |
| O | -0.1303196 | -1.4193496 | 0.5994792  | C  | 3.3462014  | -2.4366502 | -1.6182339 |
| C | 4.4785909  | 5.8377039  | 1.5392149  | C  | 0.9223614  | -4.3830680 | 2.1106599  |
| C | 5.2277690  | 4.6366915  | 1.4203660  | C  | 2.6219569  | -3.8082432 | 0.2969684  |
| H | 2.5007826  | 6.7049801  | 1.7004854  | H  | 4.4001612  | -4.8744765 | 2.1529874  |
| H | 4.9944750  | 6.8100144  | 1.5363799  | H  | 3.1460704  | -6.1129932 | 1.8508914  |
| H | 5.1838367  | 2.4831560  | 1.3315120  | C  | 3.9831720  | -1.1901750 | -2.2314216 |
| H | 6.3220364  | 4.6832604  | 1.3103041  | C  | 3.1976827  | -2.6087313 | -0.2121480 |
| C | 5.3451260  | 1.0741204  | 4.7910200  | C  | 2.3895698  | -4.0476350 | 1.7901219  |
| C | 6.1261410  | -0.1097287 | 4.7107741  | H  | 2.0950173  | -0.1833467 | -2.7080946 |
| H | 3.7890658  | 2.2740022  | 3.9056598  | H  | 0.2584226  | -3.5681322 | 1.7637308  |
| H | 5.4923919  | 1.7704830  | 5.6307419  | H  | 2.7703842  | -1.1192464 | -4.0779208 |
| H | 6.8862608  | -0.3200001 | 5.4786132  | H  | 0.0081801  | -5.0298925 | -3.4438099 |
| H | 6.4881821  | -1.9439766 | 3.6180447  | H  | 0.5918401  | -5.3273331 | 1.6304596  |
| C | -1.8373565 | 3.6556885  | 0.2512714  | H  | 3.7177966  | -5.6048623 | -4.3199200 |
| C | -1.1925653 | 3.1844802  | 1.4323715  | H  | 4.2039672  | -0.4787333 | -1.4105978 |
| C | -3.2286442 | 3.4924675  | 0.1331978  | H  | 2.6208184  | -3.1042944 | 2.3229723  |
| C | -1.9601383 | 2.5739635  | 2.4612120  | H  | 3.0599885  | -3.3307904 | -3.5641840 |
| C | -3.3503962 | 2.4380861  | 2.2897971  | Zn | -0.7115428 | 0.0822727  | -2.8546455 |
| C | -4.0082498 | 2.8820297  | 1.1326133  | Br | -0.2612010 | 1.1553205  | -4.8572397 |
| C | -1.3336772 | 2.0959210  | 3.7700969  | Zn | -1.7604900 | -2.5423135 | 0.3363749  |
| H | -3.9299062 | 1.9532906  | 3.0884366  | Br | -3.6341188 | -1.5541869 | 1.3408854  |
| C | -1.6278948 | 0.6135184  | 4.0581513  | H  | -3.7314620 | 3.8446085  | -0.7829219 |
| H | -2.7094813 | 0.4340987  | 4.2288182  | C  | -6.8231802 | -0.0832101 | -1.2146350 |
| H | -1.0873264 | 0.2840137  | 4.9698668  | C  | -5.4760936 | -0.1097143 | -1.5828381 |
| H | -1.3145975 | -0.0274556 | 3.2122918  | C  | -4.9848712 | 0.8512042  | -2.5008504 |
| C | -1.7704767 | 2.9984250  | 4.9402287  | C  | -5.8480936 | 1.8387829  | -3.0329414 |
| H | -0.2335854 | 2.2019986  | 3.6796856  | C  | -7.1958552 | 1.8604381  | -2.6549606 |
| H | -2.8677514 | 2.9447057  | 5.1013037  | C  | -7.6813613 | 0.8975590  | -1.7505186 |
| H | -1.5105430 | 4.0598723  | 4.7498277  | H  | -7.2061249 | -0.8180845 | -0.4910074 |
| H | -1.2760118 | 2.6865068  | 5.8838487  | C  | -3.5816663 | 0.8479552  | -2.8918487 |
| C | -5.5156254 | 2.7567330  | 0.9368846  | H  | -5.4511288 | 2.5864570  | -3.7381079 |
| C | -6.1692081 | 1.6658935  | 1.7932242  | H  | -7.8719958 | 2.6276221  | -3.0605137 |
| H | -7.2330931 | 1.5385205  | 1.5069051  | H  | -8.7407206 | 0.9178811  | -1.4510905 |
| H | -6.1501441 | 1.9260882  | 2.8724554  | O  | -2.7606833 | 0.0141511  | -2.4701127 |
| H | -5.6577278 | 0.6905505  | 1.6672401  | H  | -4.7808818 | -0.8410909 | -1.1414641 |
| C | -6.2059795 | 4.1178832  | 1.1546839  | H  | -3.2461632 | 1.6389778  | -3.6100875 |
| H | -5.6673604 | 2.4787986  | -0.1299422 | C  | -3.0600658 | -4.3650027 | -2.8627115 |
| H | -7.2926988 | 4.0513023  | 0.9372978  | C  | -2.0106074 | -3.8620749 | -2.1423229 |
| H | -5.7727249 | 4.9032457  | 0.5028811  | C  | -1.5146410 | -2.7163575 | -2.9316120 |
| H | -6.0868962 | 4.4523440  | 2.2068541  | O  | -2.2021504 | -2.5664628 | -4.0732140 |
| C | -1.0736566 | 4.3411142  | -0.8815903 | C  | -3.2396076 | -3.5716181 | -4.1140761 |
| C | -1.4252722 | 3.7813413  | -2.2669989 | O  | -0.6058514 | -1.9310996 | -2.6062991 |
| H | -0.7737888 | 4.2211109  | -3.0486899 | H  | -1.4333848 | -4.1527049 | -0.8266722 |
| H | -2.4756576 | 3.9987150  | -2.5542927 | C  | -3.1142771 | -4.1580097 | -5.0508282 |
| H | -1.2747709 | 2.6870373  | -2.2962699 | H  | -4.2154576 | -3.0398785 | -4.1763296 |
| C | -1.2860972 | 5.8667731  | -0.8413817 | H  | -0.3250310 | -4.1810359 | -0.8757223 |
| H | 0.0061571  | 4.1450605  | -0.7250445 | H  | -1.8292024 | -5.0834516 | -0.3795849 |
| H | -0.6933400 | 6.3700434  | -1.6333650 | H  | -3.7066643 | -5.2089840 | -2.5876230 |
| H | -0.9901977 | 6.2988411  | 0.1357089  |    |            |            |            |
| H | -2.3552725 | 6.1194374  | -1.0036001 |    |            |            |            |
| H | 1.5721543  | -6.6138772 | -2.3322173 |    |            |            |            |
| H | 5.1960706  | -2.2312420 | -3.7487770 |    |            |            |            |
| H | 3.1989806  | -5.2636242 | 3.4287343  |    |            |            |            |
| C | 2.0060389  | -5.7993933 | -2.9534835 |    |            |            |            |
| H | 3.4997046  | 0.4456438  | -3.6120170 |    |            |            |            |
| H | 0.6565296  | -6.2003109 | -4.6362842 |    |            |            |            |
| H | 0.7808979  | -4.4974583 | 3.2049255  |    |            |            |            |
| C | 2.3946792  | -4.6755167 | -2.0002381 |    |            |            |            |
| C | 5.3301616  | -1.5323915 | -2.8966850 |    |            |            |            |
| C | 0.9289155  | -5.3621587 | -3.9618031 |    |            |            |            |
| H | 1.2822098  | -4.5227397 | -4.5961210 |    |            |            |            |
| C | 2.9365283  | -3.4698776 | -2.4782053 |    |            |            |            |
| C | 3.3371716  | -5.1324635 | 2.3354057  |    |            |            |            |
| H | 4.0066213  | -6.7151554 | -2.9451237 |    |            |            |            |
| C | 2.2471234  | -4.8182945 | -0.6113215 |    |            |            |            |
| C | 3.2430095  | -6.3708305 | -3.6714760 |    |            |            |            |
| H | 2.9656856  | -7.2310350 | -4.3156635 |    |            |            |            |
| H | 1.8155396  | -5.7550574 | -0.2217107 |    |            |            |            |

int2

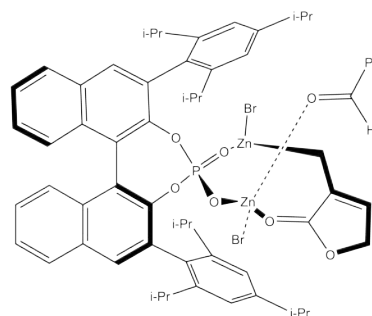

Energy (Hartree) = -11970.03005869

|   |           |           |           |
|---|-----------|-----------|-----------|
| C | 1.0703637 | 2.0719783 | 1.5306740 |
| C | 2.4681880 | 2.0400212 | 1.5991395 |
| C | 3.1686358 | 3.3031384 | 1.5683820 |
| C | 4.5869356 | 3.3991241 | 1.4400193 |

|   |            |            |            |    |             |            |            |
|---|------------|------------|------------|----|-------------|------------|------------|
| C | 2.4067277  | 4.5275743  | 1.6363974  | C  | 2.0091752   | -5.8039520 | -2.9539336 |
| C | 3.0954248  | 5.7775169  | 1.6430794  | H  | 3.4811121   | 0.4477910  | -3.6120611 |
| C | 0.9834122  | 4.4732296  | 1.6584660  | H  | 0.6574064   | -6.2132137 | -4.6336586 |
| H | 0.4179585  | 5.4153743  | 1.7199572  | H  | 0.7678394   | -4.4864288 | 3.2024256  |
| C | 0.2924149  | 3.2721482  | 1.5555995  | C  | 2.3917182   | -4.6782409 | -2.0003548 |
| C | 3.6106585  | -1.5363460 | 0.7414916  | C  | 5.3142051   | -1.5290236 | -2.9029028 |
| C | 4.6337936  | -1.7202389 | 1.6644680  | C  | 0.9206423   | -5.3762096 | -3.9540235 |
| H | 5.2124275  | -2.6566794 | 1.6450972  | H  | 1.2582165   | -4.5271651 | -4.5840386 |
| C | 4.9163822  | -0.7587358 | 2.6760480  | C  | 2.9285915   | -3.4705882 | -2.4779490 |
| C | 5.9055460  | -1.0103803 | 3.6736794  | C  | 3.3186129   | -5.1448004 | 2.3334671  |
| C | 4.1597937  | 0.4702161  | 2.7257271  | H  | 4.0195751   | -6.6965744 | -2.9592041 |
| C | 4.3861290  | 1.3545811  | 3.8232742  | C  | 2.2443397   | -4.8213067 | -0.6118460 |
| C | 3.1890653  | 0.7370046  | 1.6897236  | C  | 3.2473039   | -6.3614672 | -3.6803235 |
| C | 2.9191099  | -0.2860678 | 0.7728498  | H  | 2.9762937   | -7.2244401 | -4.3234435 |
| O | 0.3629442  | 0.8776117  | 1.5048267  | H  | 1.8159412   | -5.7595242 | -0.2221448 |
| O | 1.9711578  | -0.0775885 | -0.2151308 | C  | 3.0175239   | -0.4743609 | -3.2068715 |
| P | 0.3684339  | -0.0466563 | 0.1523385  | H  | 5.8010192   | -0.6116168 | -3.2936088 |
| O | -0.2675170 | 0.6774163  | -1.0420149 | H  | 6.0101772   | -2.0101424 | -2.1860899 |
| O | -0.1543301 | -1.4095248 | 0.5950167  | C  | 3.3361769   | -2.4365622 | -1.6183882 |
| C | 4.4774314  | 5.8332113  | 1.5482607  | C  | 0.9112138   | -4.3684279 | 2.1088497  |
| C | 5.2247664  | 4.6318536  | 1.4289609  | C  | 2.6165235   | -3.8106342 | 0.2964520  |
| H | 2.5009275  | 6.7025159  | 1.7074248  | H  | 4.3840527   | -4.8979328 | 2.1504184  |
| H | 4.9943526  | 6.8049097  | 1.5471732  | H  | 3.1187349   | -6.1234177 | 1.8488753  |
| H | 5.1774928  | 2.4784174  | 1.3373526  | C  | 3.9696793   | -1.1884530 | -2.2320505 |
| H | 6.3191958  | 4.6768655  | 1.3204694  | C  | 3.1893798   | -2.6099472 | -0.2124053 |
| C | 5.3414878  | 1.0701867  | 4.7890021  | C  | 2.3824502   | -4.0498873 | 1.7894050  |
| C | 6.1224023  | -0.1129141 | 4.7075824  | H  | 2.0842128   | -0.1733664 | -2.6943622 |
| H | 3.7835714  | 2.2694287  | 3.9056920  | H  | 0.2578039   | -3.5432871 | 1.7663151  |
| H | 5.4896182  | 1.7665449  | 5.6284904  | H  | 2.7420840   | -1.1138001 | -4.0704238 |
| H | 6.8835853  | -0.3233830 | 5.4742333  | H  | -0.0023748  | -5.0615473 | -3.4291989 |
| H | 6.4828754  | -1.9465359 | 3.6142931  | H  | 0.5689301   | -5.3064531 | 1.6245011  |
| C | -1.8407895 | 3.6612670  | 0.2540357  | H  | 3.7101398   | -5.5905164 | -4.3312119 |
| C | -1.1968575 | 3.1867029  | 1.4340227  | H  | 4.1934996   | -0.4787676 | -1.4105419 |
| C | -3.2317296 | 3.4981144  | 0.1349318  | H  | 2.6237878   | -3.1099139 | 2.3236051  |
| C | -1.9646274 | 2.5713807  | 2.4597484  | H  | 3.0510312   | -3.3303149 | -3.5638969 |
| C | -3.3542911 | 2.4347179  | 2.2864280  | Zn | -0.6647086  | 0.1045555  | -2.8703150 |
| C | -4.0115200 | 2.8840170  | 1.1314442  | Br | -0.3121436  | 1.1881277  | -4.8746677 |
| C | -1.3401724 | 2.0892471  | 3.7679886  | Zn | -1.7930029  | -2.5189736 | 0.3397980  |
| H | -3.9335487 | 1.9455231  | 3.0823906  | Br | -3.6823281  | -1.6085082 | 1.3690628  |
| C | -1.6377543 | 0.6071045  | 4.0534675  | H  | -3.7341201  | 3.8538593  | -0.7801137 |
| H | -2.7193584 | 0.4274634  | 4.2227887  | C  | -6.7830901  | -0.0998736 | -1.1903175 |
| H | -1.0986656 | 0.2745945  | 4.9647346  | C  | -5.4360874  | -0.1233842 | -1.5597074 |
| H | -1.3241863 | -0.0342850 | 3.2082394  | C  | -4.9540181  | 0.8209584  | -2.4985188 |
| C | -1.7763518 | 2.9916355  | 4.9383395  | C  | -5.8256945  | 1.7896117  | -3.0494206 |
| H | -0.2398044 | 2.1935813  | 3.6790429  | C  | -7.1734002  | 1.8076444  | -2.6716648 |
| H | -2.8738596 | 2.9409693  | 5.0978345  | C  | -7.6501113  | 0.8604790  | -1.7465511 |
| H | -1.5141854 | 4.0525990  | 4.7493838  | H  | -7.1549865  | -0.8206751 | -0.4470665 |
| H | -1.2844865 | 2.6775585  | 5.8825031  | C  | -3.5491076  | 0.8165060  | -2.8915908 |
| C | -5.5191796 | 2.7615645  | 0.9361053  | H  | -5.4343962  | 2.5263357  | -3.7693303 |
| C | -6.1737007 | 1.6703968  | 1.7913463  | H  | -7.8562423  | 2.5605655  | -3.0925665 |
| H | -7.2379157 | 1.5434956  | 1.5055839  | H  | -8.7091890  | 0.8793193  | -1.4458283 |
| H | -6.1562142 | 1.9311979  | 2.8702952  | O  | -2.7282550  | -0.0099582 | -2.4610522 |
| H | -5.6622825 | 0.6945914  | 1.6688153  | H  | -4.7354142  | -0.8381294 | -1.0990656 |
| C | -6.2065184 | 4.1235183  | 1.1575048  | H  | -3.2118583  | 1.5975627  | -3.6214293 |
| H | -5.6723223 | 2.4859108  | -0.1314508 | C  | -3.0402227  | -4.3234029 | -2.8726878 |
| H | -7.2938683 | 4.0609383  | 0.9418805  | C  | -1.9876001  | -3.8312700 | -2.1489886 |
| H | -5.7715797 | 4.9098677  | 0.5082867  | C  | -1.4712022  | -2.6944144 | -2.9424274 |
| H | -6.0846114 | 4.4554013  | 2.2098945  | O  | -2.1544203  | -2.5423468 | -4.0886673 |
| C | -1.0767389 | 4.3482364  | -0.8776381 | C  | -3.2034355  | -3.5310528 | -4.1281520 |
| C | -1.4291950 | 3.7911933  | -2.2637791 | O  | -0.5559064  | -1.9192180 | -2.6201404 |
| H | -0.7759217 | 4.2268504  | -3.0459799 | C  | -1.42411293 | -4.1213434 | -0.8305460 |
| H | -2.4785850 | 4.0132982  | -2.5520180 | H  | -3.0831121  | -4.1221386 | -5.0633831 |
| H | -1.2828088 | 2.6965602  | -2.2946015 | H  | -4.1717962  | -2.9850187 | -4.1958379 |
| C | -1.2873747 | 5.8738848  | -0.8347535 | H  | -0.3152341  | -4.1332570 | -0.8626606 |
| H | 0.0028817  | 4.1502303  | -0.7222300 | H  | -1.8165399  | -5.0562492 | -0.3894029 |
| H | -0.6950210 | 6.3783763  | -1.6261732 | H  | -3.6983364  | -5.1571346 | -2.5943534 |
| H | -0.9911617 | 6.3043142  | 0.1428299  |    |             |            |            |
| H | -2.3562999 | 6.1285971  | -0.9947896 |    |             |            |            |
| H | 1.5874457  | -6.6242943 | -2.3317852 |    |             |            |            |
| H | 5.1781635  | -2.2253418 | -3.7566229 |    |             |            |            |
| H | 3.1800358  | -5.2756693 | 3.4267018  |    |             |            |            |

## 7.8.6 Pathway 14d-ma ↔ 14d-mi

TS1; COSMO

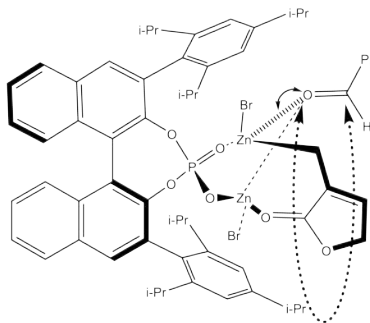

Energy (Hartree) = -11970.01402861

|   |            |            |            |
|---|------------|------------|------------|
| C | 1.1155062  | 1.9625288  | 1.5818221  |
| C | 2.4910830  | 1.9388135  | 1.8402251  |
| C | 3.1646703  | 3.1997831  | 2.0450190  |
| C | 4.5835439  | 3.3119398  | 2.1648917  |
| C | 2.3823101  | 4.4123119  | 2.0997623  |
| C | 3.0362438  | 5.6574940  | 2.3440651  |
| C | 0.9820770  | 4.3554511  | 1.8497714  |
| H | 0.4012120  | 5.2906612  | 1.8568854  |
| C | 0.3419978  | 3.1625921  | 1.5352645  |
| C | 3.8601001  | -1.4016865 | 0.5392608  |
| C | 4.7568899  | -1.7375497 | 1.5467345  |
| H | 5.3757117  | -2.6403568 | 1.4356243  |
| C | 4.8632799  | -0.9794392 | 2.7471871  |
| C | 5.7102909  | -1.4039339 | 3.8142563  |
| C | 4.0709462  | 0.2143702  | 2.9106301  |
| C | 4.1161539  | 0.8912904  | 4.1652107  |
| C | 3.2325128  | 0.6473148  | 1.8212947  |
| C | 3.1154844  | -0.1939387 | 0.7107076  |
| O | 0.4305141  | 0.7725020  | 1.3916615  |
| O | 2.2276629  | 0.1597889  | -0.3101702 |
| P | 0.6481200  | -0.1337814 | 0.0266103  |
| O | -0.1521166 | 0.4596626  | -1.1414497 |
| O | 0.3899267  | -1.5789038 | 0.4462403  |
| C | 4.4131468  | 5.7240810  | 2.4927054  |
| C | 5.1912058  | 4.5405872  | 2.3843462  |
| H | 2.4222190  | 6.5705977  | 2.3943307  |
| H | 4.9055012  | 6.6915209  | 2.6749432  |
| H | 5.2010420  | 2.4081922  | 2.0741914  |
| H | 6.2872933  | 4.5970222  | 2.4689465  |
| C | 4.9348656  | 0.4409485  | 5.1914063  |
| C | 5.7519173  | -0.7071838 | 5.0124578  |
| H | 3.4765641  | 1.7713551  | 4.3195750  |
| H | 4.9430967  | 0.9729797  | 6.1550438  |
| H | 6.4011481  | -1.0522802 | 5.8316394  |
| H | 6.3161311  | -2.3129724 | 3.6734926  |
| C | -1.3839523 | 3.6435010  | -0.2281387 |
| C | -1.0787670 | 3.1346739  | 1.0657613  |
| C | -2.7283197 | 3.6572537  | -0.6435809 |
| C | -2.1111819 | 2.6062255  | 1.8851638  |
| C | -3.4403114 | 2.6448153  | 1.4206939  |
| C | -3.7761401 | 3.1853147  | 0.1657456  |
| C | -1.8118478 | 2.0447731  | 3.2736964  |
| H | -4.2393408 | 2.2614323  | 2.0747927  |
| C | -2.2533356 | 0.5801658  | 3.4105170  |
| H | -3.3583580 | 0.4755914  | 3.3913715  |
| H | -1.8862789 | 0.1374671  | 4.3582682  |
| H | -1.8347988 | -0.0247844 | 2.5821099  |
| C | -2.4178248 | 2.9273080  | 4.3793411  |
| H | -0.7123254 | 2.0598318  | 3.4122487  |
| H | -3.5258700 | 2.9581857  | 4.3122416  |
| H | -2.0486562 | 3.9702173  | 4.3049568  |
| H | -2.1514485 | 2.5386898  | 5.3840680  |
| C | -5.2192009 | 3.3716492  | -0.2932948 |
| C | -6.1474729 | 2.1911199  | 0.0231777  |
| H | -7.1560880 | 2.3659581  | -0.4044799 |

|    |            |            |            |
|----|------------|------------|------------|
| H  | -6.2803280 | 2.0581241  | 1.1180038  |
| H  | -5.7488082 | 1.2443794  | -0.3879861 |
| C  | -5.7811425 | 4.6884727  | 0.2797840  |
| H  | -5.1866444 | 3.4800081  | -1.4005079 |
| H  | -6.8086862 | 4.8823314  | -0.0931231 |
| H  | -5.1433171 | 5.5518522  | 0.0032685  |
| H  | -5.8216516 | 4.6457327  | 1.3887128  |
| C  | -0.3121274 | 4.1974406  | -1.1679613 |
| C  | -0.3520308 | 3.5479932  | -2.5608436 |
| H  | 0.4744388  | 3.9385556  | -3.1900255 |
| H  | -1.2997110 | 3.7605540  | -3.0980511 |
| H  | -0.2372995 | 2.4503059  | -2.4936006 |
| C  | -0.4081698 | 5.7319302  | -1.2653210 |
| H  | 0.6759459  | 3.9527885  | -0.7287894 |
| H  | 0.4008959  | 6.1359191  | -1.9085075 |
| H  | -0.3258458 | 6.2132677  | -0.2697443 |
| H  | -1.3779589 | 6.0441618  | -1.7070332 |
| H  | 2.1304168  | -5.5647548 | -3.8196900 |
| H  | 6.0890639  | -1.1300918 | -3.6478721 |
| H  | 3.3674959  | -5.4671134 | 2.4030404  |
| C  | 2.6621816  | -4.6585389 | -4.1858784 |
| H  | 4.2626588  | 1.4824842  | -3.2235902 |
| H  | 1.3724153  | -4.5364618 | -5.9591137 |
| H  | 0.8857302  | -4.9267732 | 1.8935162  |
| C  | 3.0268834  | -3.8354745 | -2.9570918 |
| C  | 6.0513147  | -0.6077873 | -2.6686734 |
| C  | 1.6994726  | -3.8956031 | -5.1140783 |
| H  | 2.1845001  | -2.9964198 | -5.5478031 |
| C  | 3.6238951  | -2.5691260 | -3.0806086 |
| C  | 3.6476272  | -5.1236777 | 1.3856295  |
| H  | 4.5895813  | -5.7140744 | -4.2845806 |
| C  | 2.7574033  | -4.3076229 | -1.6629762 |
| C  | 3.9155961  | -5.1314875 | -4.9444811 |
| H  | 3.6409421  | -5.7702461 | -5.8097046 |
| H  | 2.2841612  | -5.2968632 | -1.5543550 |
| C  | 3.7962862  | 0.4781731  | -3.1511494 |
| H  | 6.5577148  | 0.3725153  | -2.7895556 |
| H  | 6.6366242  | -1.2109203 | -1.9450286 |
| C  | 3.9268078  | -1.7717818 | -1.9640790 |
| C  | 1.2144058  | -4.7198730 | 0.8529516  |
| C  | 3.0250887  | -3.5460025 | -0.5090378 |
| H  | 4.6682577  | -4.6965449 | 1.4409478  |
| H  | 3.6977920  | -6.0141571 | 0.7235815  |
| C  | 4.5985424  | -0.4186904 | -2.1919728 |
| C  | 3.6204926  | -2.2605730 | -0.6621294 |
| C  | 2.6238865  | -4.1021777 | 0.8565612  |
| H  | 2.7543474  | 0.6053868  | -2.7979710 |
| H  | 0.4889335  | -4.0360838 | 0.3701712  |
| H  | 3.7625631  | 0.0568156  | -4.1776201 |
| H  | 0.7969252  | -3.5497930 | -4.5701087 |
| H  | 1.1733660  | -5.6829940 | 0.3025445  |
| H  | 4.4943190  | -4.2682926 | -5.3355582 |
| H  | 4.6495004  | 0.1060998  | -1.2169935 |
| H  | 2.5941316  | -3.2527245 | 1.5691869  |
| H  | 3.8527577  | -2.1790380 | -4.0851066 |
| Zn | -1.7856151 | -0.2519946 | -1.9946459 |
| Br | -1.7091601 | 0.3189046  | -4.2507308 |
| Zn | -0.3832404 | -2.2933558 | 2.1760192  |
| Br | 1.0813469  | -1.9373209 | 3.9451470  |
| H  | -2.9741025 | 4.0644490  | -1.6383358 |
| C  | -7.5459538 | -3.2721205 | -1.9404150 |
| C  | -6.2645094 | -2.7170895 | -1.9852577 |
| C  | -5.8857367 | -1.9096675 | -3.0851390 |
| C  | -6.8014941 | -1.6670418 | -4.1332099 |
| C  | -8.0844744 | -2.2283583 | -4.0850738 |
| C  | -8.4549189 | -3.0280690 | -2.9899100 |
| H  | -7.8461114 | -3.9021374 | -1.0893304 |
| C  | -4.5506616 | -1.3029310 | -3.1379990 |
| H  | -6.4971749 | -1.0358147 | -4.9834678 |
| H  | -8.7997305 | -2.0434474 | -4.9004105 |
| H  | -9.4634147 | -3.4681427 | -2.9517099 |

|   |            |            |            |
|---|------------|------------|------------|
| O | -3.6949337 | -1.4888788 | -2.2634118 |
| H | -5.5318263 | -2.8939126 | -1.1830686 |
| H | -4.3103594 | -0.6419295 | -4.0120662 |
| C | -4.4997197 | -2.2027831 | 2.2459938  |
| C | -3.2974249 | -2.3052417 | 1.6021386  |
| C | -3.2960583 | -1.2089579 | 0.6054743  |
| O | -4.4601744 | -0.5366462 | 0.6193943  |
| C | -5.2867756 | -1.0717271 | 1.6725879  |
| O | -2.3677107 | -0.8952312 | -0.1463948 |
| C | -2.1442325 | -3.1989240 | 1.7512962  |
| H | -6.2605363 | -1.3739966 | 1.2265123  |
| H | -5.4901606 | -0.2442664 | 2.3894621  |
| H | -1.8904387 | -3.6460443 | 0.7655565  |
| H | -2.3451322 | -4.0094466 | 2.4776402  |
| H | -4.8637787 | -2.8381616 | 3.0645993  |

### TS1

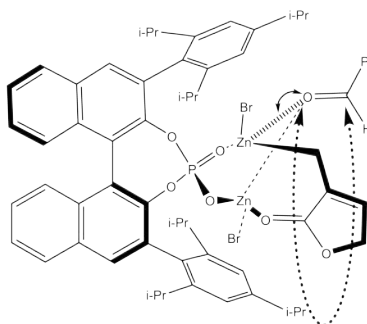

Energy (Hartree) = -11969.9988476  
number of imaginary frequencies: 4

|   |            |            |            |
|---|------------|------------|------------|
| C | 1.1171529  | 1.9678182  | 1.5788176  |
| C | 2.4927525  | 1.9409891  | 1.8368841  |
| C | 3.1689262  | 3.2003832  | 2.0420006  |
| C | 4.5878691  | 3.3090052  | 2.1613573  |
| C | 2.3894991  | 4.4145172  | 2.0975937  |
| C | 3.0465987  | 5.6576266  | 2.3420150  |
| C | 0.9891732  | 4.3604645  | 1.8489191  |
| H | 0.4099370  | 5.2966588  | 1.8573134  |
| C | 0.3460908  | 3.1693377  | 1.5346011  |
| C | 3.8541175  | -1.4031728 | 0.5371551  |
| C | 4.7496552  | -1.7404653 | 1.5450285  |
| H | 5.3657466  | -2.6451505 | 1.4344577  |
| C | 4.8580953  | -0.9821661 | 2.7450144  |
| C | 5.7036954  | -1.4077762 | 3.8123394  |
| C | 4.0688271  | 0.2136272  | 2.9077623  |
| C | 4.1156443  | 0.8910295  | 4.1617982  |
| C | 3.2316520  | 0.6480313  | 1.8180739  |
| C | 3.1128814  | -0.1933908 | 0.7079898  |
| O | 0.4293357  | 0.7795213  | 1.3876768  |
| O | 2.2260448  | 0.1620484  | -0.3131243 |
| P | 0.6463405  | -0.1275298 | 0.0232526  |
| O | -0.1515713 | 0.4659747  | -1.1472739 |
| O | 0.3838773  | -1.5718385 | 0.4431350  |
| C | 4.4232807  | 5.7208658  | 2.4900905  |
| C | 5.1982286  | 4.5358651  | 2.3810225  |
| H | 2.4348240  | 6.5721917  | 2.3927778  |
| H | 4.9179756  | 6.6870596  | 2.6724526  |
| H | 5.2028992  | 2.4036884  | 2.0702185  |
| H | 6.2944296  | 4.5896424  | 2.4652761  |
| C | 4.9330775  | 0.4392406  | 5.1879257  |
| C | 5.7470369  | -0.7106518 | 5.0097448  |
| H | 3.4780644  | 1.7725416  | 4.3155801  |
| H | 4.9424592  | 0.9716811  | 6.1512480  |
| H | 6.3952650  | -1.0569749 | 5.8291372  |

|   |            |            |            |
|---|------------|------------|------------|
| H | 6.3070569  | -2.3185081 | 3.6722717  |
| C | -1.3900057 | 3.6585632  | -0.2172019 |
| C | -1.0772887 | 3.1454552  | 1.0730649  |
| C | -2.7375375 | 3.6804959  | -0.6215164 |
| C | -2.1055960 | 2.6195006  | 1.8989844  |
| C | -3.4379775 | 2.6664273  | 1.4454159  |
| C | -3.7811168 | 3.2123085  | 0.1950512  |
| C | -1.7981774 | 2.0506576  | 3.2827172  |
| H | -4.2336156 | 2.2855374  | 2.1052291  |
| C | -2.2467769 | 0.5880375  | 3.4169072  |
| H | -3.3527191 | 0.4895215  | 3.4065669  |
| H | -1.8737385 | 0.1385557  | 4.3590053  |
| H | -1.8386843 | -0.0152778 | 2.5821697  |
| C | -2.3889720 | 2.9321557  | 4.3972482  |
| H | -0.6975795 | 2.0581603  | 3.4121720  |
| H | -3.4973513 | 2.9703955  | 4.3401704  |
| H | -2.0141272 | 3.9729565  | 4.3238177  |
| H | -2.1161569 | 2.5378141  | 5.3979466  |
| C | -5.2270283 | 3.4082548  | -0.2508778 |
| C | -6.1591961 | 2.2323358  | 0.0711973  |
| H | -7.1706482 | 2.4132607  | -0.3471220 |
| H | -6.2834096 | 2.0983409  | 1.1669517  |
| H | -5.7690756 | 1.2843498  | -0.3453483 |
| C | -5.7766394 | 4.7270629  | 0.3293832  |
| H | -5.2036932 | 3.5183680  | -1.3582036 |
| H | -6.8062354 | 4.9278541  | -0.0341597 |
| H | -5.1360903 | 5.5870198  | 0.0492136  |
| H | -5.8075625 | 4.6825974  | 1.4384351  |
| C | -0.3226716 | 4.2074186  | -1.1649493 |
| C | -0.3776108 | 3.5595707  | -2.5581767 |
| H | 0.4458737  | 3.9456244  | -3.1936866 |
| H | -1.3280511 | 3.7781930  | -3.0879585 |
| H | -0.2683239 | 2.4612865  | -2.4933350 |
| C | -0.4106538 | 5.7424844  | -1.2599713 |
| H | 0.6674432  | 3.9566800  | -0.7338598 |
| H | 0.3954606  | 6.1423941  | -1.9092063 |
| H | -0.3175914 | 6.2224530  | -0.2647626 |
| H | -1.3820236 | 6.0609864  | -1.6935342 |
| H | 2.1069438  | -5.5633361 | -3.8163419 |
| H | 6.0811892  | -1.1434532 | -3.6516953 |
| H | 3.3507468  | -5.4662719 | 2.4044709  |
| C | 2.6413824  | -4.6591760 | -4.1840063 |
| H | 4.2652580  | 1.4768147  | -3.2280567 |
| H | 1.3492354  | -4.5339960 | -5.9556214 |
| H | 0.8713199  | -4.9178575 | 1.8969943  |
| C | 3.0106073  | -3.8367755 | -2.9561500 |
| C | 6.0460908  | -0.6201921 | -2.6729852 |
| C | 1.6797515  | -3.8938515 | -5.1113784 |
| H | 2.1667787  | -2.9965344 | -5.5464514 |
| C | 3.6111850  | -2.5725337 | -3.0811518 |
| C | 3.6309847  | -5.1248471 | 1.3864806  |
| H | 4.5647156  | -5.7215868 | -4.2844354 |
| C | 2.7415729  | -4.3072362 | -1.6616864 |
| C | 3.8918997  | -5.1374533 | -4.9439412 |
| H | 3.6140039  | -5.7759486 | -5.8083495 |
| H | 2.2655841  | -5.2949836 | -1.5518869 |
| C | 3.7949721  | 0.4745162  | -3.1544417 |
| H | 6.5562989  | 0.3579494  | -2.7950770 |
| H | 6.6294798  | -1.2251258 | -1.9494698 |
| C | 3.9180145  | -1.7754567 | -1.9657799 |
| C | 1.1991632  | -4.7120146 | 0.8559717  |
| C | 3.0126404  | -3.5458633 | -0.5087032 |
| H | 4.6532307  | -4.7016375 | 1.4402548  |
| H | 3.6773970  | -6.0159364 | 0.7250335  |
| C | 4.5944624  | -0.4250225 | -2.1953978 |
| C | 3.6115254  | -2.2624068 | -0.6633416 |
| C | 2.6108566  | -4.0997631 | 0.8576868  |
| H | 2.7539405  | 0.6064849  | -2.8007332 |
| H | 0.4760181  | -4.0251366 | 0.3740457  |
| H | 3.7584339  | 0.0529016  | -4.1806534 |
| H | 0.7792173  | -3.5444165 | -4.5666088 |



|    |            |            |            |   |            |            |            |
|----|------------|------------|------------|---|------------|------------|------------|
| H  | 1.1534909  | -5.6747343 | 0.3051337  | H | -4.6950701 | 3.4670778  | 1.7600946  |
| H  | 4.4733005  | -4.2768158 | -5.3363788 | C | -2.9363098 | 2.5162794  | 0.9483828  |
| H  | 4.6483844  | 0.1001834  | -1.2207975 | C | -1.2092944 | -1.6329802 | -2.8268820 |
| H  | 2.5845420  | -3.2500981 | 1.5702133  | C | -1.5913817 | -1.4610226 | -4.1518197 |
| H  | 3.8399606  | -2.1837328 | -4.0861413 | H | -1.2186716 | -2.1615252 | -4.9141757 |
| Zn | -1.7789622 | -0.2513708 | -2.0055771 | C | -2.4112542 | -0.3729067 | -4.5633567 |
| Br | -1.7095253 | 0.3201793  | -4.2599084 | C | -2.6983719 | -0.1504904 | -5.9436011 |
| Zn | -0.3916468 | -2.2829455 | 2.1736174  | C | -2.9232016 | 0.5472547  | -3.5778886 |
| Br | 1.0716833  | -1.9333313 | 3.9424313  | C | -3.6363205 | 1.6953209  | -4.0350251 |
| H  | -2.9890565 | 4.0912435  | -1.6133749 | C | -2.6526394 | 0.2995948  | -2.1821930 |
| C  | -7.5052655 | -3.3340317 | -1.9794237 | C | -1.7631185 | -0.7343955 | -1.8651149 |
| C  | -6.2294077 | -2.7657826 | -2.0153117 | O | -1.0729404 | 1.5359577  | -0.1812436 |
| C  | -5.8464140 | -1.9660318 | -3.1187702 | O | -1.4187303 | -0.9609995 | -0.5309522 |
| C  | -6.7525544 | -1.7443598 | -4.1791949 | P | -0.3922329 | 0.0883055  | 0.1967010  |
| C  | -8.0299323 | -2.3186283 | -4.1400848 | O | -0.5285463 | -0.2577326 | 1.6874325  |
| C  | -8.4045308 | -3.1107178 | -3.0413239 | O | 1.0074948  | 0.1527674  | -0.4200751 |
| H  | -7.8085385 | -3.9586391 | -1.1254368 | C | -7.4795681 | 1.8551288  | -0.7530731 |
| C  | -4.5162423 | -1.3457838 | -3.1624569 | C | -6.9939083 | 0.9241535  | -1.7091876 |
| H  | -6.4449907 | -1.1187144 | -5.0324374 | H | -6.9568557 | 3.1945560  | 0.8659748  |
| H  | -8.7376175 | -2.1496953 | -4.9654212 | H | -8.5596651 | 2.0526163  | -0.6771522 |
| H  | -9.4086867 | -3.5611399 | -3.0101009 | H | -5.2740323 | -0.0534975 | -2.5652904 |
| O  | -3.6701038 | -1.5140199 | -2.2769842 | H | -7.7019541 | 0.3908046  | -2.3616997 |
| H  | -5.5036517 | -2.9256992 | -1.2032391 | C | -3.8789515 | 1.8970409  | -5.3866197 |
| H  | -4.2705580 | -0.6909826 | -4.0402752 | C | -3.4235522 | 0.9588117  | -6.3510929 |
| C  | -4.5085241 | -2.1782108 | 2.2366057  | H | -3.9787588 | 2.4400471  | -3.3037251 |
| C  | -3.3056071 | -2.2885859 | 1.5944109  | H | -4.4207693 | 2.7976792  | -5.7136715 |
| C  | -3.2995533 | -1.1954496 | 0.5938088  | H | -3.6287020 | 1.1256005  | -7.4195663 |
| O  | -4.4620724 | -0.5184218 | 0.6036348  | H | -2.3105003 | -0.8689673 | -6.6828235 |
| C  | -5.2906832 | -1.0457277 | 1.6580361  | C | -2.0208609 | 2.1362102  | 3.2579056  |
| O  | -2.3708583 | -0.8861084 | -0.1575344 | C | -1.9550059 | 2.8428439  | 2.0276480  |
| C  | -2.1559046 | -3.1838161 | 1.7479680  | C | -0.9251047 | 2.2455000  | 4.1609222  |
| H  | -6.2657422 | -1.3451247 | 1.2121744  | C | -0.8520096 | 3.7021082  | 1.7521370  |
| H  | -5.4902654 | -0.2135962 | 2.3708678  | C | 0.2027777  | 3.7917209  | 2.6780972  |
| H  | -1.9012710 | -3.6334144 | 0.7636372  | C | 0.2010410  | 3.0726876  | 3.8855480  |
| H  | -2.3601266 | -3.9922713 | 2.4755554  | H | -1.0116607 | 1.7903051  | 5.1622354  |
| H  | -4.8755993 | -2.8090674 | 3.0572588  | C | -0.8432982 | 4.5560647  | 0.4890322  |
|    |            |            |            | H | 1.0587668  | 4.4385746  | 2.4472328  |
|    |            |            |            | C | 0.5558803  | 4.8448221  | -0.0653340 |
|    |            |            |            | H | 1.1403032  | 5.5275922  | 0.5855943  |
|    |            |            |            | H | 0.4795361  | 5.3181499  | -1.0638499 |
|    |            |            |            | H | 1.1387692  | 3.9110482  | -0.1909047 |
|    |            |            |            | C | -1.6288811 | 5.8578846  | 0.7507896  |
|    |            |            |            | H | -1.3896701 | 3.9969879  | -0.2965905 |
|    |            |            |            | H | -1.1419562 | 6.4610597  | 1.5452875  |
|    |            |            |            | H | -2.6678654 | 5.6443573  | 1.0737679  |
|    |            |            |            | H | -1.6748874 | 6.4741789  | -0.1702097 |
|    |            |            |            | C | 1.3116529  | 3.1982298  | 4.9213863  |
|    |            |            |            | C | 2.6332370  | 3.7339097  | 4.3569927  |
|    |            |            |            | H | 3.4288646  | 3.6600481  | 5.1251210  |
|    |            |            |            | H | 2.5516407  | 4.8063373  | 4.0813107  |
|    |            |            |            | H | 2.9677768  | 3.1761274  | 3.4604047  |
|    |            |            |            | C | 0.8260836  | 4.0552218  | 6.1091471  |
|    |            |            |            | H | 1.4904860  | 2.1694120  | 5.3111808  |
|    |            |            |            | H | 1.6047924  | 4.0996304  | 6.8974801  |
|    |            |            |            | H | -0.0969773 | 3.6447251  | 6.5652864  |
|    |            |            |            | H | 0.6111767  | 5.0934950  | 5.7802099  |
|    |            |            |            | C | -3.2371602 | 1.3082570  | 3.6641948  |
|    |            |            |            | C | -2.9019610 | -0.1238919 | 4.1080226  |
|    |            |            |            | H | -3.8348432 | -0.6698407 | 4.3553745  |
|    |            |            |            | H | -2.2544695 | -0.1562792 | 5.0083115  |
|    |            |            |            | H | -2.3932815 | -0.6821289 | 3.2962935  |
|    |            |            |            | C | -4.0336229 | 2.0649338  | 4.7462090  |
|    |            |            |            | H | -3.8889927 | 1.2219583  | 2.7738162  |
|    |            |            |            | H | -4.9626633 | 1.5137074  | 4.9976787  |
|    |            |            |            | H | -4.3170284 | 3.0823478  | 4.4075345  |
|    |            |            |            | H | -3.4420359 | 2.1734957  | 5.6793470  |
|    |            |            |            | H | 3.5908871  | -5.4692234 | -1.5386442 |
|    |            |            |            | H | -2.2974198 | -6.1313936 | -1.5743285 |
|    |            |            |            | H | 2.2036403  | -0.8651536 | -5.6319196 |
|    |            |            |            | C | 2.5763945  | -5.8378123 | -1.2656499 |
|    |            |            |            | H | -3.3568322 | -4.0676086 | 0.6204725  |

## 7.9 Interconversion of Complexes 14 - Mechanism 2

### 7.9.1 Pathway 14j-ma $\leftrightarrow$ 14j-mi

TS1; COSMO

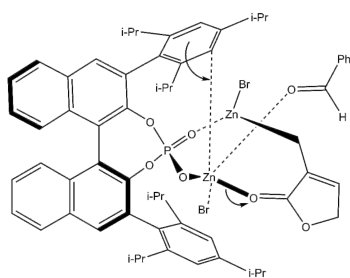

Energy (Hartree) = -11970.03154154

|    |            |            |            |
|----|------------|------------|------------|
| Zn | 0.2387804  | 0.4009241  | 3.3580557  |
| Br | 0.6522369  | -0.8505856 | 5.3040254  |
| Zn | 1.8280178  | 1.6459107  | -1.5311212 |
| Br | 0.3398210  | 2.2373768  | -3.2721884 |
| C  | -2.4481564 | 1.7048320  | -0.1233445 |
| C  | -3.2597996 | 1.1287722  | -1.1026904 |
| C  | -4.6856933 | 1.3425092  | -0.9923375 |
| C  | -5.6330193 | 0.6747533  | -1.8254915 |
| C  | -5.1878813 | 2.2445687  | 0.0194821  |
| C  | -6.5910011 | 2.4943179  | 0.0985694  |
| C  | -4.2900115 | 2.8193844  | 0.9671086  |

|   |            |            |            |
|---|------------|------------|------------|
| H | 3.3609509  | -6.8783118 | 0.4965059  |
| H | 3.2044052  | 0.1266830  | -3.4726135 |
| C | 1.5924254  | -4.7375356 | -1.6460976 |
| C | -2.7919445 | -5.1857186 | -1.8806149 |
| C | 2.5787528  | -6.1328407 | 0.2443216  |
| H | 1.6063322  | -6.5505136 | 0.5783865  |
| C | 0.2403376  | -4.7984319 | -1.2659279 |
| C | 1.8645475  | -1.7585885 | -5.0677011 |
| H | 2.3574896  | -6.9139965 | -3.1730076 |
| C | 2.0062902  | -3.6339647 | -2.4110293 |
| C | 2.3141649  | -7.1165797 | -2.0838637 |
| H | 3.0625499  | -7.9013488 | -1.8472696 |
| H | 3.0637042  | -3.5723794 | -2.7173802 |
| C | -2.2861886 | -4.0253573 | 0.3315469  |
| H | -3.8645026 | -5.2640450 | -1.6065055 |
| H | -2.7237567 | -5.1132920 | -2.9852206 |
| C | -0.6868905 | -3.8059396 | -1.6308171 |
| C | 2.9613612  | -0.8428160 | -2.9881975 |
| C | 1.1242051  | -2.6030057 | -2.7893023 |
| H | 0.9289151  | -2.1202407 | -5.5374599 |
| H | 2.6296864  | -2.5542070 | -5.1912626 |
| C | -2.1436307 | -3.9656762 | -1.2001048 |
| C | -0.2441355 | -2.6998603 | -2.4086730 |
| C | 1.6619610  | -1.4135053 | -3.5810879 |
| H | -1.8364083 | -3.1310224 | 0.8054604  |
| H | 2.8799935  | -0.6865971 | -1.8928742 |
| H | -1.7932477 | -4.9263343 | 0.7531763  |
| H | 2.7713171  | -5.2168046 | 0.8382768  |
| H | 3.8336597  | -1.5101758 | -3.1501903 |
| H | 1.3083051  | -7.5295272 | -1.8587979 |
| H | -2.6998548 | -3.0717257 | -1.5475402 |
| H | 0.9062012  | -0.6036364 | -3.5240673 |
| H | -0.1107862 | -5.6529601 | -0.6657391 |
| C | 3.9734189  | -2.4983267 | 0.6203331  |
| C | 3.3353591  | -1.4138149 | 1.2281856  |
| C | 3.9010695  | -0.8283407 | 2.3865172  |
| C | 5.1081100  | -1.3336885 | 2.9214669  |
| C | 5.7335832  | -2.4308372 | 2.3180056  |
| C | 5.1670355  | -3.0108941 | 1.1677645  |
| H | 3.5348931  | -2.9462585 | -0.2837143 |
| H | 2.4116517  | -0.9896328 | 0.8074530  |
| C | 3.2497044  | 0.3065374  | 3.0336507  |
| H | 5.5492999  | -0.8570464 | 3.8107177  |
| H | 6.6685594  | -2.8329299 | 2.7358937  |
| H | 5.6606471  | -3.8721193 | 0.6904246  |
| O | 2.1336489  | 0.7440214  | 2.6960753  |
| H | 3.7877256  | 0.7643898  | 3.9004366  |
| C | 5.5597072  | 0.8754686  | -1.4060952 |
| C | 4.7054703  | 1.6910117  | -0.7247898 |
| C | 5.1038166  | 1.6068005  | 0.7105797  |
| O | 6.1749704  | 0.7595466  | 0.8363859  |
| C | 6.5132726  | 0.2322985  | -0.4528767 |
| O | 4.6175656  | 2.1641541  | 1.6833630  |
| C | 3.5863696  | 2.5438063  | -1.1535005 |
| H | 6.4117637  | -0.8772326 | -0.4136657 |
| H | 7.5823430  | 0.4633293  | -0.6612818 |
| H | 3.8022533  | 3.0424056  | -2.1205672 |
| H | 3.3951580  | 3.3226666  | -0.3871583 |
| H | 5.5728244  | 0.6849662  | -2.4878950 |

number of imaginary frequencies: 1

|    |            |            |            |
|----|------------|------------|------------|
| Zn | 0.2346160  | 0.3859356  | 3.3713566  |
| Br | 0.6411749  | -0.8059116 | 5.3440522  |
| Zn | 1.8192712  | 1.6594911  | -1.5295343 |
| Br | 0.3386284  | 2.2349350  | -3.2666841 |
| C  | -2.4475286 | 1.7073188  | -0.1222059 |
| C  | -3.2584486 | 1.1302781  | -1.1017147 |
| C  | -4.6841486 | 1.3467129  | -0.9947573 |
| C  | -5.6304770 | 0.6789937  | -1.8286969 |
| C  | -5.1875131 | 2.2518220  | 0.0134468  |
| C  | -6.5900479 | 2.5035715  | 0.0878261  |
| C  | -4.2904591 | 2.8273453  | 0.9609697  |
| H  | -4.6953799 | 3.4773571  | 1.7522826  |
| C  | -2.9372953 | 2.5224422  | 0.9462956  |
| C  | -1.2074740 | -1.6352875 | -2.8178567 |
| C  | -1.5912993 | -1.4672383 | -4.1426035 |
| H  | -1.2178443 | -2.1704568 | -4.9020361 |
| C  | -2.4109576 | -0.3808640 | -4.5576237 |
| C  | -2.6990541 | -0.1622603 | -5.9377310 |
| C  | -2.9210014 | 0.5427533  | -3.5747804 |
| C  | -3.6323631 | 1.6903308  | -4.0350762 |
| C  | -2.6505762 | 0.2984011  | -2.1784914 |
| C  | -1.7614599 | -0.7349770 | -1.8579368 |
| O  | -1.0734196 | 1.5378880  | -0.1762995 |
| O  | -1.4181265 | -0.9589336 | -0.5235260 |
| P  | -0.3910892 | 0.0907947  | 0.2041718  |
| O  | -0.5335446 | -0.2511500 | 1.6952000  |
| O  | 1.0087738  | 0.1550800  | -0.4109272 |
| C  | -7.4773467 | 1.8644943  | -0.7643316 |
| C  | -6.9907545 | 0.9311368  | -1.7167739 |
| H  | -6.9567447 | 3.2062263  | 0.8526659  |
| H  | -8.5571961 | 2.0642563  | -0.6916134 |
| H  | -5.2695212 | -0.0505977 | -2.5660290 |
| H  | -7.6976979 | 0.3978359  | -2.3704197 |
| C  | -3.8760620 | 1.8874540  | -5.3866683 |
| C  | -3.4231931 | 0.9458745  | -6.3481143 |
| H  | -3.9712263 | 2.4382409  | -3.3055932 |
| H  | -4.4157161 | 2.7884133  | -5.7160553 |
| H  | -3.6281796 | 1.1097926  | -7.4169687 |
| H  | -2.3111997 | -0.8827852 | -6.6748780 |
| C  | -2.0255581 | 2.1465396  | 3.2578174  |
| C  | -1.9575253 | 2.8506245  | 2.0262956  |
| C  | -0.9311949 | 2.2557686  | 4.1611190  |
| C  | -0.8521505 | 3.7062096  | 1.7491221  |
| C  | 0.2022981  | 3.7937056  | 2.6752959  |
| C  | 0.1975225  | 3.0775492  | 3.8845276  |
| H  | -1.0156801 | 1.7967792  | 5.1606663  |
| C  | -0.8408004 | 4.5560917  | 0.4828796  |
| H  | 1.0622073  | 4.4344150  | 2.4420679  |
| C  | 0.5592515  | 4.8521769  | -0.0648468 |
| H  | 1.1352066  | 5.5431611  | 0.5852617  |
| H  | 0.4859506  | 5.3176734  | -1.0671022 |
| H  | 1.1497853  | 3.9224871  | -0.1820961 |
| C  | -1.6367601 | 5.8535042  | 0.7335070  |
| H  | -1.3770733 | 3.9901892  | -0.3048154 |
| H  | -1.1600156 | 6.4637514  | 1.5287615  |
| H  | -2.6764875 | 5.6346457  | 1.0500997  |
| H  | -1.6810822 | 6.4661385  | -0.1899692 |
| C  | 1.3096130  | 3.1988318  | 4.9194183  |
| C  | 2.6338259  | 3.7265033  | 4.3536959  |
| H  | 3.4300146  | 3.6505664  | 5.1210856  |
| H  | 2.5592724  | 4.7993033  | 4.0771337  |
| H  | 2.9674780  | 3.1670199  | 3.4579212  |
| C  | 0.8300843  | 4.0593228  | 6.1068359  |
| H  | 1.4820587  | 2.1690613  | 5.3099398  |
| H  | 1.6089017  | 4.1007155  | 6.8952277  |
| H  | -0.0947470 | 3.6546939  | 6.5644829  |
| H  | 0.6200615  | 5.0987098  | 5.7782653  |
| C  | -3.2427630 | 1.3189026  | 3.6635865  |
| C  | -2.9093529 | -0.1153826 | 4.1022852  |

TS1

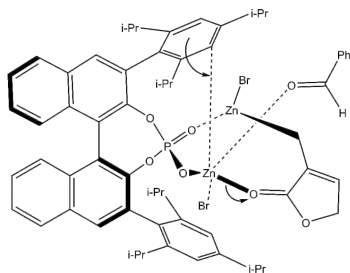

Energy (Hartree) = -11970.01879902

|   |            |            |            |
|---|------------|------------|------------|
| H | -3.8423956 | -0.6607539 | 4.3506033  |
| H | -2.2582803 | -0.1545276 | 4.9997716  |
| H | -2.4051230 | -0.6724116 | 3.2871720  |
| C | -4.0372294 | 2.0733225  | 4.7483899  |
| H | -3.8957440 | 1.2368399  | 2.7735422  |
| H | -4.9671164 | 1.5237371  | 5.0004999  |
| H | -4.3190624 | 3.0925740  | 4.4138691  |
| H | -3.4453182 | 2.1788486  | 5.6816225  |
| H | 3.5980509  | -5.4747205 | -1.5613238 |
| H | -2.2892334 | -6.1308373 | -1.5567665 |
| H | 2.1939203  | -0.8536287 | -5.6292425 |
| C | 2.5844331  | -5.8430805 | -1.2833923 |
| H | -3.3332555 | -4.0667255 | 0.6476856  |
| H | 3.3790343  | -6.8949098 | 0.4684777  |
| H | 3.1972349  | 0.1337072  | -3.4701328 |
| C | 1.6001707  | -4.7391075 | -1.6523310 |
| C | -2.7847550 | -5.1842658 | -1.8583923 |
| C | 2.5970845  | -6.1462972 | 0.2248272  |
| H | 1.6265864  | -6.5644862 | 0.5633628  |
| C | 0.2512143  | -4.7988074 | -1.2626394 |
| C | 1.8597828  | -1.7500414 | -5.0672014 |
| H | 2.3504398  | -6.9077359 | -3.1950438 |
| C | 2.0097719  | -3.6344046 | -2.4173723 |
| C | 2.3150152  | -7.1166672 | -2.1070451 |
| H | 3.0625781  | -7.9051289 | -1.8803640 |
| H | 3.0650553  | -3.5731600 | -2.7314439 |
| C | -2.2646376 | -4.0250582 | 0.3515854  |
| H | -3.8555826 | -5.2630600 | -1.5779343 |
| H | -2.7230086 | -5.1112819 | -2.9631438 |
| C | -0.6778065 | -3.8060125 | -1.6208124 |
| C | 2.9600077  | -0.8383552 | -2.9880467 |
| C | 1.1265379  | -2.6021303 | -2.7884556 |
| H | 0.9237142  | -2.1118216 | -5.5355578 |
| H | 2.6253649  | -2.5443030 | -5.1966437 |
| C | -2.1317049 | -3.9653261 | -1.1807888 |
| C | -0.2396190 | -2.6999669 | -2.4008156 |
| C | 1.6603667  | -1.4101845 | -3.5792449 |
| H | -1.8113751 | -3.1317724 | 0.8237111  |
| H | 2.8804829  | -0.6842624 | -1.8924097 |
| H | -1.7698776 | -4.9260340 | 0.7709076  |
| H | 2.7933657  | -5.2343341 | 0.8234171  |
| H | 3.8339671  | -1.5028385 | -3.1546130 |
| H | 1.3096368  | -7.5284144 | -1.8785259 |
| H | -2.6893577 | -3.0709043 | -1.5245598 |
| H | 0.9049341  | -0.6001824 | -3.5186480 |
| H | -0.0966183 | -5.6529567 | -0.6601495 |
| C | 3.9602199  | -2.5130996 | 0.6152360  |
| C | 3.3254750  | -1.4295715 | 1.2286406  |
| C | 3.8974226  | -0.8451133 | 2.3835186  |
| C | 5.1081442  | -1.3492469 | 2.9090427  |
| C | 5.7311632  | -2.4446502 | 2.3005798  |
| C | 5.1574394  | -3.0247202 | 1.1542479  |
| H | 3.5137501  | -2.9606331 | -0.2850956 |
| H | 2.3989330  | -1.0055441 | 0.8139766  |
| C | 3.2463646  | 0.2896657  | 3.0347453  |
| H | 5.5557467  | -0.8704576 | 3.7938428  |
| H | 6.6697142  | -2.8453664 | 2.7118494  |
| H | 5.6469897  | -3.8868464 | 0.6740667  |
| O | 2.1305868  | 0.7255286  | 2.6991326  |
| H | 3.7843078  | 0.7442575  | 3.9035736  |
| C | 5.5573072  | 0.8942499  | -1.3997593 |
| C | 4.6975701  | 1.6981631  | -0.7117139 |
| C | 5.0866749  | 1.5909387  | 0.7259989  |
| O | 6.1603352  | 0.7440474  | 0.8446160  |
| C | 6.5060384  | 0.2383364  | -0.4488194 |
| O | 4.5887303  | 2.1267485  | 1.7032291  |
| C | 3.5779505  | 2.5525445  | -1.1302747 |
| H | 6.4062348  | -0.8723389 | -0.4264079 |
| H | 7.5768040  | 0.4738643  | -0.6467294 |
| H | 3.7922820  | 3.0650184  | -2.0902349 |
| H | 3.3841389  | 3.3199083  | -0.3533026 |

H 5.5747044 0.7196812 -2.4841714

## TS2; COSMO

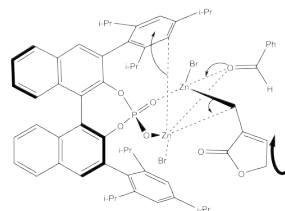

Energy (Hartree) = -11970.0132807

|    |            |            |            |
|----|------------|------------|------------|
| Zn | 2.4489305  | 1.3530832  | 0.9950541  |
| Br | 4.7123548  | 1.1641696  | 1.3510344  |
| Zn | -0.3539859 | 3.0146608  | 1.8426649  |
| Br | -2.0398418 | 4.5642164  | 2.2425361  |
| C  | -1.3734675 | -1.9520259 | 1.5243332  |
| C  | -2.1836331 | -2.5386842 | 0.5514575  |
| C  | -2.2825481 | -3.9792367 | 0.5425051  |
| C  | -2.9603705 | -4.7096605 | -0.4794197 |
| C  | -1.6353557 | -4.7234602 | 1.5993052  |
| C  | -1.7616872 | -6.1453185 | 1.6269303  |
| C  | -0.8201371 | -4.0446483 | 2.5517957  |
| H  | -0.2868893 | -4.6378722 | 3.3101572  |
| C  | -0.6183344 | -2.6697843 | 2.4994868  |
| C  | -2.5369195 | -0.0973663 | -2.3925739 |
| C  | -3.8807154 | -0.2473394 | -2.7136496 |
| H  | -4.2758114 | 0.2409574  | -3.6174719 |
| C  | -4.7643425 | -1.0185456 | -1.9044699 |
| C  | -6.1599014 | -1.0904199 | -2.1951981 |
| C  | -4.2431570 | -1.7427761 | -0.7695961 |
| C  | -5.1595365 | -2.4645433 | 0.0531069  |
| C  | -2.8299774 | -1.6817493 | -0.4851472 |
| C  | -2.0561873 | -0.7916089 | -1.2422942 |
| O  | -1.2979126 | -0.5628010 | 1.5597286  |
| O  | -0.7054957 | -0.5992533 | -0.9216151 |
| P  | -0.3838234 | 0.2177446  | 0.4617047  |
| O  | 1.1222368  | -0.0176880 | 0.7112527  |
| O  | -0.8861019 | 1.6628994  | 0.4537770  |
| C  | -2.4607927 | -6.8206349 | 0.6376951  |
| C  | -3.0485275 | -6.0946755 | -0.4322789 |
| H  | -1.2737318 | -6.6988508 | 2.4445406  |
| H  | -2.5452742 | -7.9175776 | 0.6693731  |
| H  | -3.4138030 | -4.1646433 | -1.3185799 |
| H  | -3.5749799 | -6.6336531 | -1.2347800 |
| C  | -6.5144153 | -2.4990599 | -0.2466201 |
| C  | -7.0199897 | -1.8184518 | -1.3867151 |
| H  | -4.7817798 | -2.9862689 | 0.9436895  |
| H  | -7.2031830 | -3.0532504 | 0.4090611  |
| H  | -8.0954100 | -1.8587552 | -1.6174241 |
| H  | -6.5431651 | -0.5421448 | -3.0700439 |
| C  | 1.8067437  | -2.2358578 | 2.9899605  |
| C  | 0.4392416  | -1.9619528 | 3.2887935  |
| C  | 2.8028128  | -1.5531498 | 3.7127658  |
| C  | 0.1086388  | -0.9703383 | 4.2553336  |
| C  | 1.1464876  | -0.2991841 | 4.9307301  |
| C  | 2.5034081  | -0.5950952 | 4.6953944  |
| H  | 3.8618126  | -1.7704354 | 3.5008492  |

|   |            |            |            |
|---|------------|------------|------------|
| C | -1.3405462 | -0.6614271 | 4.6311835  |
| H | 0.8840304  | 0.4733807  | 5.6704240  |
| C | -1.7091279 | 0.8171742  | 4.4174239  |
| H | -1.1031853 | 1.4979691  | 5.0466781  |
| H | -2.7784914 | 0.9931311  | 4.6538361  |
| H | -1.5638185 | 1.1082793  | 3.3573852  |
| C | -1.6303590 | -1.1017445 | 6.0794837  |
| H | -1.9962674 | -1.2689431 | 3.9739352  |
| H | -1.0233869 | -0.5209146 | 6.8045618  |
| H | -1.3976265 | -2.1760260 | 6.2277584  |
| H | -2.6991309 | -0.9415154 | 6.3312274  |
| C | 3.6208522  | 0.0498802  | 5.5084398  |
| C | 3.6987731  | 1.5736034  | 5.3181433  |
| H | 4.5322820  | 1.9975781  | 5.9157342  |
| H | 2.7617210  | 2.0671018  | 5.6459139  |
| H | 3.8779570  | 1.8319937  | 4.2554370  |
| C | 3.4953239  | -0.3187644 | 6.9986617  |
| H | 4.5742928  | -0.3825029 | 5.1329678  |
| H | 4.3536994  | 0.0820343  | 7.5767690  |
| H | 3.4641427  | -1.4178613 | 7.1432664  |
| H | 2.5686193  | 0.1061115  | 7.4379123  |
| C | 2.2425338  | -3.2351992 | 1.9153442  |
| C | 3.2520461  | -2.6361164 | 0.9192370  |
| H | 3.4743196  | -3.3668221 | 0.1136250  |
| H | 4.2149733  | -2.3711378 | 1.4015908  |
| H | 2.8487036  | -1.7163491 | 0.4560926  |
| C | 2.7989501  | -4.5234623 | 2.5510828  |
| H | 1.3445812  | -3.5142522 | 1.3284937  |
| H | 3.0716555  | -5.2640585 | 1.7706316  |
| H | 2.0615777  | -4.9970387 | 3.2302708  |
| H | 3.7099231  | -4.3094592 | 3.1484603  |
| H | 1.6681276  | 3.4556136  | -5.4750425 |
| H | -0.4021048 | -1.8721868 | -6.4492174 |
| H | -4.1516600 | 3.9641038  | -2.0997224 |
| C | 1.0193131  | 2.7747396  | -6.0740040 |
| H | 0.3094633  | -3.3677348 | -3.7859582 |
| H | 2.5897014  | 2.5323207  | -7.5701186 |
| H | -2.0224997 | 4.5275983  | -0.7716347 |
| C | 0.1660714  | 1.9968056  | -5.0737598 |
| C | -1.2187875 | -2.1096953 | -5.7359942 |
| C | 1.9325264  | 1.8996548  | -6.9399178 |
| H | 1.3418340  | 1.2560285  | -7.6249151 |
| C | 0.0301753  | 0.6009082  | -5.1090882 |
| C | -3.5560080 | 3.3845452  | -2.8348163 |
| H | -0.5047835 | 4.3481868  | -6.3698127 |
| C | -0.5589782 | 2.6981911  | -4.0894040 |
| C | 0.1288882  | 3.6633605  | -6.9674286 |
| H | 0.7462173  | 4.2797542  | -7.6532031 |
| H | -0.4516997 | 3.7932258  | -4.0340217 |
| C | 0.3848312  | -2.2606568 | -3.7641812 |
| H | -1.3506806 | -3.2112560 | -5.7426852 |
| H | -2.1500447 | -1.6497672 | -6.1244433 |
| C | -0.8266394 | -0.0907806 | -4.2287549 |
| C | -1.4564451 | 4.0700384  | -1.6071259 |
| C | -1.4358350 | 2.0601311  | -3.1935978 |
| H | -4.1828490 | 2.5447306  | -3.1937993 |
| H | -3.3469952 | 4.0440106  | -3.7035770 |
| C | -0.9018969 | -1.6151152 | -4.3141434 |
| C | -1.5825910 | 0.6471247  | -3.2797314 |
| C | -2.2431469 | 2.8891194  | -2.1966757 |
| H | 0.5709769  | -1.9468663 | -2.7181090 |
| H | -0.4808360 | 3.7391355  | -1.1994621 |
| H | 1.2683943  | -1.9667869 | -4.3691460 |
| H | 2.5778965  | 1.2400265  | -6.3275682 |
| H | -1.2693405 | 4.8658431  | -2.3584968 |
| H | -0.5464642 | 3.0352422  | -7.5853334 |
| H | -1.7376110 | -1.9477530 | -3.6655367 |
| H | -2.5054903 | 2.2249300  | -1.3499074 |
| H | 0.6000162  | 0.0185194  | -5.8470292 |
| C | 3.6393304  | -0.6087287 | -2.8409439 |
| C | 2.9269454  | 0.3429783  | -2.1082488 |

|   |           |            |            |
|---|-----------|------------|------------|
| C | 2.9672882 | 1.7055055  | -2.4951698 |
| C | 3.7109942 | 2.0924521  | -3.6363482 |
| C | 4.4467991 | 1.1382191  | -4.3471971 |
| C | 4.4094621 | -0.2109506 | -3.9501643 |
| H | 3.5937434 | -1.6681183 | -2.5482353 |
| H | 2.2953318 | 0.0247407  | -1.2665967 |
| C | 2.2905563 | 2.7466015  | -1.7319188 |
| H | 3.7264842 | 3.1499426  | -3.9431654 |
| H | 5.0465181 | 1.4412991  | -5.2179870 |
| H | 4.9787444 | -0.9629815 | -4.5176986 |
| O | 1.9270855 | 2.6689347  | -0.5411049 |
| H | 2.1046000 | 3.7122919  | -2.2636597 |
| C | 1.7162515 | 5.4310133  | 3.3514465  |
| C | 1.4097564 | 4.1322160  | 3.6011092  |
| C | 0.8500183 | 4.0750779  | 4.9866454  |
| O | 0.8223318 | 5.3441468  | 5.5015415  |
| O | 1.3294147 | 6.2655675  | 4.5290938  |
| O | 0.4821315 | 3.1081484  | 5.6293986  |
| C | 1.4661750 | 2.9200015  | 2.7431362  |
| H | 2.1758440 | 6.8306627  | 4.9800068  |
| H | 0.5281698 | 6.9984041  | 4.2796780  |
| H | 1.5711351 | 2.0199049  | 3.3865764  |
| H | 2.3789568 | 3.0629174  | 2.1101413  |
| H | 2.1316145 | 5.8506322  | 2.4245644  |

## T52

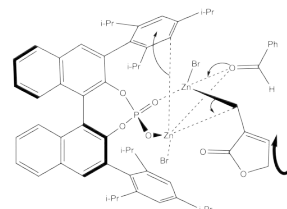

Energy (Hartree) = -11969.99861016  
number of imaginary frequencies: 1

|    |            |            |            |
|----|------------|------------|------------|
| Zn | 2.4457334  | 1.3604206  | 1.0244571  |
| Br | 4.7127750  | 1.1895248  | 1.3276800  |
| Zn | -0.3728297 | 3.0387380  | 1.8445102  |
| Br | -2.0393058 | 4.6005019  | 2.2213971  |
| C  | -1.3725069 | -1.9480615 | 1.5266709  |
| C  | -2.1791477 | -2.5348197 | 0.5508001  |
| C  | -2.2780880 | -3.9752660 | 0.5405485  |
| C  | -2.9548740 | -4.7051085 | -0.4821677 |
| C  | -1.6327425 | -4.7200542 | 1.5978652  |
| C  | -1.7597986 | -6.1413775 | 1.6238671  |
| C  | -0.8191413 | -4.0413935 | 2.5515068  |
| H  | -0.2852573 | -4.6340512 | 3.3098689  |
| C  | -0.6173717 | -2.6666383 | 2.5016133  |
| C  | -2.5213155 | -0.0873202 | -2.3888385 |
| C  | -3.8640651 | -0.2359485 | -2.7141205 |
| H  | -4.2547536 | 0.2561094  | -3.6178505 |
| C  | -4.7508513 | -1.0086343 | -1.9105393 |
| C  | -6.1452075 | -1.0793802 | -2.2049022 |
| C  | -4.2331695 | -1.7359670 | -0.7764220 |
| C  | -5.1521278 | -2.4597725 | 0.0411792  |
| C  | -2.8211169 | -1.6763208 | -0.4871364 |
| C  | -2.0434138 | -0.7849546 | -1.2392644 |
| O  | -1.3002026 | -0.5599376 | 1.5650019  |
| O  | -0.6946737 | -0.5938360 | -0.9128955 |
| P  | -0.3828208 | 0.2258180  | 0.4743641  |

|   |            |            |            |   |            |            |            |
|---|------------|------------|------------|---|------------|------------|------------|
| O | 1.1215886  | -0.0108178 | 0.7345204  | H | -1.3391022 | -3.1916287 | -5.7446806 |
| O | -0.8845077 | 1.6691446  | 0.4580532  | H | -2.1400196 | -1.6296513 | -6.1201338 |
| C | -2.4577390 | -6.8161145 | 0.6341037  | C | -0.8125315 | -0.0736783 | -4.2260269 |
| C | -3.0438712 | -6.0896995 | -0.4356061 | C | -1.4414295 | 4.0825635  | -1.5977907 |
| H | -1.2729016 | -6.6952995 | 2.4418386  | C | -1.4248155 | 2.0739152  | -3.1858970 |
| H | -2.5426501 | -7.9129811 | 0.6655598  | H | -4.1734389 | 2.5546386  | -3.1709800 |
| H | -3.4076622 | -4.1585954 | -1.3206235 | H | -3.3432393 | 4.0555204  | -3.6841738 |
| H | -3.5703336 | -6.6278904 | -1.2385814 | C | -0.8862171 | -1.5979509 | -4.3140152 |
| C | -6.5056465 | -2.4931397 | -0.2625895 | C | -1.5675177 | 0.6606587  | -3.2736355 |
| C | -7.0076914 | -1.8091878 | -1.4015443 | C | -2.2285531 | 2.9005679  | -2.1843393 |
| H | -4.7758690 | -2.9837091 | 0.9309356  | H | 0.5894033  | -1.9318656 | -2.7220379 |
| H | -7.1962976 | -3.0489388 | 0.3896349  | H | -0.4631738 | 3.7533286  | -1.1948829 |
| H | -8.0824531 | -1.8478762 | -1.6352973 | H | 1.2841741  | -1.9488784 | -4.3745983 |
| H | -6.5259005 | -0.5276787 | -3.0787168 | H | 2.5773237  | 1.2754246  | -6.3447506 |
| C | 1.8084983  | -2.2333715 | 2.9839711  | H | -1.2604090 | 4.8803955  | -2.3488609 |
| C | 0.4423766  | -1.9595058 | 3.2882088  | H | -0.5676108 | 3.0479985  | -7.5799999 |
| C | 2.8068316  | -1.5469350 | 3.6991695  | H | -1.7197325 | -1.9319043 | -3.6633795 |
| C | 0.1151150  | -0.9658206 | 4.2535794  | H | -2.4854977 | 2.2339268  | -1.3361173 |
| C | 1.1552177  | -0.2910197 | 4.9216654  | H | 0.6067073  | 0.0410554  | -5.8502767 |
| C | 2.5111816  | -0.5862134 | 4.6800590  | C | 3.6416158  | -0.6865665 | -2.7807435 |
| H | 3.8652122  | -1.7629046 | 3.4829504  | C | 2.9268471  | 0.2797133  | -2.0693819 |
| C | -1.3329963 | -0.6602113 | 4.6360757  | C | 2.9546688  | 1.6306453  | -2.4931368 |
| H | 0.8955054  | 0.4843179  | 5.6592575  | C | 3.6882500  | 1.9907717  | -3.6487161 |
| C | -1.7091061 | 0.8167139  | 4.4239217  | C | 4.4261926  | 1.0234955  | -4.3387627 |
| H | -1.1049513 | 1.5000996  | 5.0518056  | C | 4.4011054  | -0.3144221 | -3.9049848 |
| H | -2.7779635 | 0.9877958  | 4.6654370  | H | 3.6051143  | -1.7366575 | -2.4554714 |
| H | -1.5718368 | 1.1094701  | 3.3633442  | H | 2.3047191  | -0.0186410 | -1.2137374 |
| C | -1.6125253 | -1.1000659 | 6.0865298  | C | 2.2738597  | 2.6870426  | -1.7514410 |
| H | -1.9897826 | -1.2715439 | 3.9831073  | H | 3.6924672  | 3.0392991  | -3.9857269 |
| H | -1.0034181 | -0.5158564 | 6.8067409  | H | 5.0177969  | 1.3073157  | -5.2215912 |
| H | -1.3747934 | -2.1730654 | 6.2353958  | H | 4.9727977  | -1.0773075 | -4.4555155 |
| H | -2.6801044 | -0.9429686 | 6.3449787  | O | 1.9158674  | 2.6380312  | -0.5601603 |
| C | 3.6327805  | 0.0594952  | 5.4866724  | H | 2.0802450  | 3.6374480  | -2.3100100 |
| C | 3.7101046  | 1.5830754  | 5.2969517  | C | 1.6546394  | 5.4503742  | 3.3681058  |
| H | 4.5472530  | 2.0059971  | 5.8900813  | C | 1.3869060  | 4.1406584  | 3.6007939  |
| H | 2.7754443  | 2.0763058  | 5.6310471  | C | 0.8364671  | 4.0476050  | 4.9908908  |
| H | 3.8858015  | 1.8421389  | 4.2338907  | O | 0.7742642  | 5.3092967  | 5.5217949  |
| C | 3.5144228  | -0.3104678 | 6.9770720  | C | 1.2446288  | 6.2557673  | 4.5598287  |
| H | 4.5842135  | -0.3727650 | 5.1057165  | O | 0.5047043  | 3.0602072  | 5.6179998  |
| H | 4.3751329  | 0.0900512  | 7.5518196  | H | 1.4612174  | 2.9429325  | 2.7255352  |
| H | 3.4835504  | -1.4095002 | 7.1211062  | C | 2.0726506  | 6.8461793  | 5.0141386  |
| H | 2.5898487  | 0.1140608  | 7.4205845  | H | 0.4163339  | 6.9619400  | 4.3195386  |
| C | 2.2411289  | -3.2358860 | 1.9109313  | H | 1.5860351  | 2.0381505  | 3.3600767  |
| C | 3.2444182  | -2.6377352 | 0.9081190  | H | 2.3646401  | 3.1110245  | 2.0845101  |
| H | 3.4656300  | -3.3707284 | 0.1039493  | H | 2.0495329  | 5.8947622  | 2.4438856  |
| H | 4.2089991  | -2.3668296 | 1.3834877  |   |            |            |            |
| H | 2.8358743  | -1.7202864 | 0.4452256  |   |            |            |            |
| C | 2.8034924  | -4.5204222 | 2.5485230  |   |            |            |            |
| H | 1.3412904  | -3.5194535 | 1.3290777  |   |            |            |            |
| H | 3.0744655  | -5.2642811 | 1.7705367  |   |            |            |            |
| H | 2.0707083  | -4.9925067 | 3.2334916  |   |            |            |            |
| H | 3.7160681  | -4.3024712 | 3.1416855  |   |            |            |            |
| H | 1.6589400  | 3.4871456  | -5.4870503 |   |            |            |            |
| H | -0.3941869 | -1.8511412 | -6.4518639 |   |            |            |            |
| H | -4.1369514 | 3.9717126  | -2.0749965 |   |            |            |            |
| C | 1.0102591  | 2.8003619  | -6.0803517 |   |            |            |            |
| H | 0.3273009  | -3.3509184 | -3.7911556 |   |            |            |            |
| H | 2.5716952  | 2.5673048  | -7.5888165 |   |            |            |            |
| H | -2.0029065 | 4.5378033  | -0.7580782 |   |            |            |            |
| C | 0.1689492  | 2.0172731  | -5.0736545 |   |            |            |            |
| C | -1.2076785 | -2.0900884 | -5.7355209 |   |            |            |            |
| C | 1.9237253  | 1.9314591  | -6.9522963 |   |            |            |            |
| H | 1.3323074  | 1.2837407  | -7.6325270 |   |            |            |            |
| C | 0.0388103  | 0.6210929  | -5.1090140 |   |            |            |            |
| C | -3.5454124 | 3.3946394  | -2.8149179 |   |            |            |            |
| H | -0.5278464 | 4.3614410  | -6.3672638 |   |            |            |            |
| C | -0.5540239 | 2.7148177  | -4.0855964 |   |            |            |            |
| C | 0.1077125  | 3.6818114  | -6.9683958 |   |            |            |            |
| H | 0.7145796  | 4.3025052  | -7.6595775 |   |            |            |            |
| H | -0.4526291 | 3.8105353  | -4.0301816 |   |            |            |            |
| C | 0.4018171  | -2.2438465 | -3.7682847 |   |            |            |            |

### TS3; COSMO

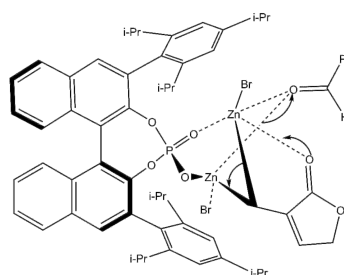

Energy (Hartree) = -11970.02767139

|    |            |            |            |
|----|------------|------------|------------|
| Zn | 1.3822826  | -0.1945068 | 2.4340739  |
| Br | 3.3076741  | -0.5482394 | 3.6830564  |
| Zn | -0.6086984 | 1.7128002  | 2.1603577  |
| Br | -0.9799023 | 3.8064214  | 3.1144949  |
| C  | -0.7543674 | -2.4628832 | -1.3651199 |
| C  | -0.8019826 | -2.2268566 | -2.7446769 |
| C  | -0.3545473 | -3.2810971 | -3.6232070 |
| C  | -0.1957364 | -3.1038897 | -5.0309550 |
| C  | -0.0174650 | -4.5656867 | -3.0556766 |
| C  | 0.3811101  | -5.6284443 | -3.9219541 |
| C  | -0.0181442 | -4.7348210 | -1.6413393 |

|   |            |            |            |   |            |            |            |
|---|------------|------------|------------|---|------------|------------|------------|
| H | 0.2867469  | -5.7068710 | -1.2244840 | H | 2.3201464  | 7.3723563  | 0.7634934  |
| C | -0.3142795 | -3.6874708 | -0.7757386 | H | -4.6474189 | 2.5980247  | 0.1230399  |
| C | -1.1270054 | 1.5890262  | -3.0835604 | C | 0.2003577  | 4.9798113  | -0.7105843 |
| C | -2.0430047 | 1.6957972  | -4.1237795 | C | 2.1256331  | 3.5131068  | -4.4146030 |
| H | -2.3482678 | 2.6943848  | -4.4706857 | C | 2.0843724  | 6.5502618  | 0.0581551  |
| C | -2.6613683 | 0.5514457  | -4.7039396 | H | 2.3715842  | 6.8926824  | -0.9583378 |
| C | -3.6688645 | 0.6912936  | -5.7059074 | C | 1.0861487  | 4.3157438  | -1.5746215 |
| C | -2.3218067 | -0.7670316 | -4.2226867 | C | -3.9249515 | 3.9772638  | -2.1314914 |
| C | -3.0740733 | -4.1735422 | -4.7135422 | H | -1.3422227 | 7.2209999  | -0.1469325 |
| C | -1.2686559 | -0.9018318 | -3.2439571 | C | -1.1205316 | 4.4956303  | -0.6353548 |
| C | -0.7198812 | 0.2710198  | -2.7114527 | C | -0.2576356 | 7.4237944  | -0.2435221 |
| O | -1.1734615 | -1.4597415 | -0.4940555 | H | -0.0151781 | 8.2840427  | 0.4140143  |
| O | 0.2959115  | 0.1683344  | -1.7566734 | H | -1.8195834 | 4.9794223  | 0.0632188  |
| P | -0.1587577 | -0.1978992 | -0.2274610 | C | 2.9260952  | 2.0254616  | -2.5089553 |
| O | 1.1260039  | -0.6307709 | 0.5018949  | H | 2.8270720  | 3.0129117  | -5.1144041 |
| O | -1.0287519 | 0.8966277  | 0.4056024  | H | 1.2460122  | 3.8566065  | -4.9960778 |
| C | 0.4876458  | -5.4319441 | -5.2905599 | C | 0.6843651  | 3.2129693  | -2.3572356 |
| C | 0.2139473  | -4.1522593 | -5.8436979 | C | -3.5861326 | 2.9204194  | 0.1354774  |
| H | 0.6223409  | -6.6062005 | -3.4760004 | C | -1.5806265 | 3.4180668  | -1.4076699 |
| H | 0.8022426  | -6.2580818 | -5.9462917 | H | -3.5943946 | 4.0375697  | -3.1875714 |
| H | -0.3949587 | -2.1176892 | -5.4723494 | H | -3.8759816 | 5.0037679  | -1.7108010 |
| H | 0.3327401  | -3.9874746 | -6.9255438 | C | 1.7066630  | 2.5565523  | -3.2828057 |
| C | -4.0627363 | -1.7049455 | -5.6729310 | C | -0.6611883 | 2.7717571  | -2.2910939 |
| C | -4.3523124 | -0.4138687 | -6.1899522 | C | -3.0524615 | 3.0101034  | -1.3041972 |
| H | -2.8703934 | -2.8805694 | -4.3162809 | H | 2.6120120  | 1.3138939  | -1.7211032 |
| H | -4.6311950 | -2.5771695 | -6.0302847 | H | -3.0246392 | 2.1843712  | 0.7390517  |
| H | -5.1322971 | -0.2912681 | -6.9568059 | H | 3.4964398  | 2.8454663  | -2.0242240 |
| H | -3.9077894 | 1.7022545  | -6.0718119 | H | 2.7360642  | 5.6910186  | 0.3102111  |
| C | 1.2730392  | -3.8606694 | 1.1700469  | H | -3.5477942 | 3.8940178  | 0.6651732  |
| C | -0.0709020 | -3.7707565 | 0.6996944  | H | -0.0639882 | 7.7291503  | -1.2934891 |
| C | 1.4975184  | -3.9292527 | 2.5588690  | H | 1.2162657  | 1.6844926  | -3.7617107 |
| C | -1.1471543 | -3.7198243 | 1.6291546  | H | -3.1533314 | 1.9990323  | -1.7481125 |
| C | -0.8633669 | -3.7945787 | 3.0059655  | H | 2.1271463  | 4.6609631  | -1.6579700 |
| C | 0.4501223  | -3.9191706 | 3.4958729  | C | 5.5626857  | 1.4375952  | 0.4881537  |
| H | 2.5317324  | -4.0051034 | 2.9304093  | C | 4.2146448  | 1.5388626  | 0.8349012  |
| C | -2.6064837 | -3.6629481 | 1.1781171  | C | 3.7069911  | 2.7665570  | 1.3336625  |
| H | -1.7032549 | -3.7750123 | 3.7188252  | C | 4.5679810  | 3.8822004  | 1.4850699  |
| C | -3.3541699 | -2.4385071 | 1.7348043  | C | 5.9187520  | 3.7707585  | 1.1410607  |
| H | -3.3707202 | -2.4280738 | 2.8443305  | C | 6.4125450  | 2.5507995  | 0.6412129  |
| H | -4.4087461 | -2.4394224 | 1.3906596  | H | 5.9585817  | 0.4889846  | 0.0963732  |
| H | -2.8941580 | -1.4926427 | 1.3899010  | H | 3.5331607  | 0.6856858  | 0.7123258  |
| C | -3.3325636 | -4.9761322 | 1.5292356  | C | 2.3068610  | 2.8933023  | 1.6868119  |
| H | -2.6143539 | -3.5780486 | 0.0722961  | H | 4.1692237  | 4.8277707  | 1.8837169  |
| H | -3.3867827 | -5.1282232 | 2.6276189  | H | 6.5924208  | 4.6320130  | 1.2606781  |
| H | -2.8106996 | -5.8528499 | 1.0944032  | H | 7.4752031  | 2.4662488  | 0.3659459  |
| H | -4.3717495 | -4.9654017 | 1.1402283  | O | 1.5190502  | 1.9208228  | 1.7014302  |
| C | 0.7414290  | -4.0626957 | 4.9862949  | H | 1.9059394  | 3.8985958  | 1.9618277  |
| C | 0.5021795  | -2.7503674 | 5.7537384  | C | -0.6047898 | 0.7060022  | 5.7806747  |
| H | 0.7205930  | -2.8800837 | 6.8340890  | C | -1.1039094 | 0.4318033  | 4.5503320  |
| H | -0.5518799 | -2.4126147 | 5.6654672  | C | -2.4928558 | 0.9796729  | 4.5028436  |
| H | 1.1619974  | -1.9449129 | 5.3717969  | O | -2.7966500 | 1.5220120  | 5.7184857  |
| C | -0.0428440 | -5.2292079 | 5.6122242  | C | -1.6474245 | 1.4318327  | 6.5736268  |
| H | 1.8241992  | -4.2999328 | 5.0742330  | O | -3.2632902 | 0.9739335  | 3.5576687  |
| H | 0.2522571  | -5.3754424 | 6.6717524  | C | -0.5680496 | -0.2116186 | 3.3300285  |
| H | 0.1405418  | -6.1780696 | 5.0687027  | H | -1.9380050 | 0.9096966  | 7.5123062  |
| H | -1.1363239 | -5.0384332 | 5.5971972  | H | -1.3305646 | 2.4645954  | 6.8451357  |
| C | 2.4804710  | -3.9273454 | 0.2316982  | H | -1.4102362 | -0.5544769 | 2.6954696  |
| C | 3.5636592  | -2.8846346 | 0.5577893  | H | -0.0598350 | -1.1639556 | 3.6211974  |
| H | 4.4015020  | -2.9703273 | -0.1649677 | H | 0.4020455  | 0.4825366  | 6.1592284  |
| H | 3.9858652  | -3.0137831 | 1.5750654  |   |            |            |            |
| C | 3.1510107  | -1.8607431 | 0.4914652  |   |            |            |            |
| C | 3.0741296  | -5.3497180 | 0.2168160  |   |            |            |            |
| H | 2.1245554  | -3.7042482 | -0.7934659 |   |            |            |            |
| H | 3.9090812  | -5.4199236 | -0.5109185 |   |            |            |            |
| H | 2.3147640  | -6.1094902 | -0.0583535 |   |            |            |            |
| H | 3.4720101  | -5.6255732 | 1.2159315  |   |            |            |            |
| H | 0.3500641  | 5.9283312  | 1.1832886  |   |            |            |            |
| H | 2.6359593  | 4.4141394  | -4.0141870 |   |            |            |            |
| H | -4.9872089 | 3.6561265  | -2.1222713 |   |            |            |            |
| C | 0.5954962  | 6.1938130  | 0.1278957  |   |            |            |            |
| H | 3.6232787  | 1.4958809  | -3.1909465 |   |            |            |            |

### TS3

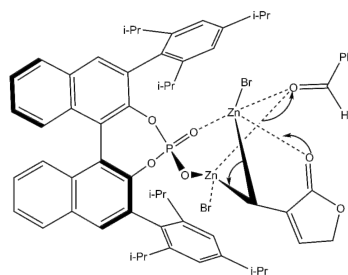

Energy (Hartree) = -11970.01452094

number of imaginary frequencies: 1

|    |            |            |            |
|----|------------|------------|------------|
| Zn | 1.3784777  | -0.2028665 | 2.4265776  |
| Br | 3.3047019  | -0.5563075 | 3.6686637  |
| Zn | -0.6117809 | 1.7081280  | 2.1562658  |
| Br | -0.9525283 | 3.8114562  | 3.0934815  |
| C  | -0.7623705 | -2.4679132 | -1.3720154 |
| C  | -0.8072279 | -2.2316015 | -2.7516959 |
| C  | -0.3585530 | -3.2858840 | -3.6293424 |
| C  | -0.1965498 | -3.1082903 | -5.0364052 |
| C  | -0.0243231 | -4.5710524 | -3.0619314 |
| C  | 0.3748593  | -5.6329323 | -3.9282119 |
| C  | -0.0286879 | -4.7403887 | -1.6478813 |
| H  | 0.2749464  | -5.7122600 | -1.2296961 |
| C  | -0.3245739 | -3.6933112 | -0.7822196 |
| C  | -1.1304169 | 1.5845832  | -3.0866334 |
| C  | -2.0434362 | 1.6928265  | -4.1289491 |
| H  | -2.3477122 | 2.6925525  | -4.4734135 |
| C  | -2.6597200 | 0.5498454  | -4.7134444 |
| C  | -3.6629561 | 0.6905005  | -5.7188558 |
| C  | -2.3219598 | -0.7692994 | -4.2331450 |
| C  | -3.0722825 | -1.8779767 | -4.7287570 |
| C  | -1.2720114 | -0.9061030 | -3.2514422 |
| C  | -0.7240765 | 0.2658684  | -2.7160316 |
| O  | -1.1807248 | -1.4653901 | -0.5016929 |
| O  | 0.2900640  | 0.1632081  | -1.7608635 |
| P  | -0.1649888 | -0.2053361 | -0.2322534 |
| O  | 1.1193491  | -0.6410835 | 0.4959209  |
| O  | -1.0330761 | 0.8887750  | 0.4027469  |
| C  | 0.4847843  | -5.4360710 | -5.2959646 |
| C  | 0.2137094  | -4.1562713 | -5.8486177 |
| H  | 0.6143096  | -6.6110844 | -3.4821666 |
| H  | 0.8001249  | -6.2622080 | -5.9512566 |
| H  | -0.3945613 | -2.1214178 | -5.4766128 |
| H  | 0.3348883  | -3.9908250 | -6.9300476 |
| C  | -4.0565727 | -1.7046052 | -5.6917500 |
| C  | -4.3440566 | -0.4133153 | -6.2077302 |
| H  | -2.8694478 | -2.8819102 | -4.3319438 |
| H  | -4.6232964 | -2.5763851 | -6.0527625 |
| H  | -5.1208299 | -0.2892880 | -6.9775307 |
| H  | -3.9007140 | 1.7021335  | -6.0836319 |
| C  | 1.2662962  | -3.8662637 | 1.1601007  |
| C  | -0.0786555 | -3.7752090 | 0.6928836  |
| C  | 1.4941009  | -3.9323325 | 2.5481876  |
| C  | -1.1521429 | -3.7188896 | 1.6249003  |
| C  | -0.8644680 | -3.7906254 | 3.0008552  |
| C  | 0.4494966  | -3.9182072 | 3.4877859  |
| H  | 2.5291422  | -4.0074328 | 2.9173537  |
| C  | -2.6125625 | -3.6588130 | 1.1779800  |
| H  | -1.7026313 | -3.7666643 | 3.7155736  |
| C  | -3.3554043 | -2.4304856 | 1.7324643  |
| H  | -3.3707193 | -2.4152490 | 2.8418604  |
| H  | -4.4106679 | -2.4285847 | 1.3910258  |
| H  | -2.8945846 | -1.4868520 | 1.3833053  |
| C  | -3.3408661 | -4.9692002 | 1.5345341  |
| H  | -2.6227397 | -3.5772586 | 0.0718880  |
| H  | -3.3927345 | -5.1188251 | 2.6332778  |
| H  | -2.8224577 | -5.8485550 | 1.1013242  |
| H  | -4.3812045 | -4.9573140 | 1.1488225  |
| C  | 0.7448587  | -4.0615517 | 4.9775262  |
| C  | 0.5178804  | -2.7473041 | 5.7451585  |
| H  | 0.7398159  | -2.8779180 | 6.8247290  |
| H  | -0.5340033 | -2.4017691 | 5.6613986  |
| H  | 1.1822139  | -1.9471622 | 5.3601094  |
| C  | -0.0433990 | -5.2233234 | 5.6069474  |
| H  | 1.8265695  | -4.3051922 | 5.0614742  |
| H  | 0.2539794  | -5.3712999 | 6.6655726  |
| H  | 0.1319558  | -6.1732068 | 5.0629593  |
| H  | -1.1358832 | -5.0271480 | 5.5959765  |
| C  | 2.4719832  | -3.9345346 | 0.2194620  |
| C  | 3.5551243  | -2.8904386 | 0.5412247  |

|   |            |            |            |
|---|------------|------------|------------|
| H | 4.3912531  | -2.9768172 | -0.1835127 |
| H | 3.9803293  | -3.0153116 | 1.5576898  |
| H | 3.1409058  | -1.8673485 | 0.4732744  |
| C | 3.0659164  | -5.3566444 | 0.2062694  |
| H | 2.1141181  | -3.7137587 | -0.8054927 |
| H | 3.8995459  | -5.4289488 | -0.5227243 |
| H | 2.3063587  | -6.1173937 | -0.0652376 |
| H | 3.4654025  | -5.6311389 | 1.2049604  |
| H | 0.3390861  | 5.9210327  | 1.1847944  |
| H | 2.6345020  | 4.4064599  | -4.0106287 |
| H | -4.9923705 | 3.6473941  | -2.1207148 |
| C | 0.5856069  | 6.1872738  | 0.1298026  |
| H | 3.6198716  | 1.4876695  | -3.1797524 |
| H | 2.3088608  | 7.3690017  | 0.7656234  |
| H | -4.6512852 | 2.5857930  | 0.1244195  |
| C | 0.1931546  | 4.9729921  | -0.7092860 |
| C | 2.1254619  | 3.5044923  | -4.4103236 |
| C | 2.0740673  | 6.5457877  | 0.0610359  |
| H | 2.3617812  | 6.8885101  | -0.9551732 |
| C | 1.0800132  | 4.3099903  | -1.5726666 |
| C | -3.9302397 | 3.9685748  | -2.1298991 |
| H | -1.3520915 | 7.2119940  | -0.1471473 |
| C | -1.1268376 | 4.4874486  | -0.6344276 |
| C | -0.2679591 | 7.4164113  | -0.2423859 |
| H | -0.0282141 | 8.2773019  | 0.4153133  |
| H | -1.8254713 | 4.9677123  | 0.0668302  |
| C | 2.9210901  | 2.0186828  | -2.5005388 |
| H | 2.8282871  | 3.0041212  | -5.1085988 |
| H | 1.2470430  | 3.8476444  | -4.9933773 |
| C | 0.6796143  | 3.2073492  | -2.3556741 |
| C | -3.5907732 | 2.9098344  | 0.1361004  |
| C | -1.5860149 | 3.4104241  | -1.4076459 |
| H | -3.6002631 | 4.0307577  | -3.1860289 |
| H | -3.8816716 | 4.9947849  | -1.7088334 |
| C | 1.7039753  | 2.5497739  | -3.2781664 |
| C | -0.6657446 | 2.7658464  | -2.2912590 |
| C | -3.0573634 | 3.0009496  | -1.3036748 |
| H | 2.6040940  | 1.3074767  | -1.7134893 |
| H | -3.0294157 | 2.1742323  | 0.7398029  |
| H | 3.4911470  | 2.8387840  | -2.0154108 |
| H | 2.7268993  | 5.6870634  | 0.3126004  |
| H | -3.5541479 | 3.8821942  | 0.6678389  |
| H | -0.0745679 | 7.7218260  | -1.2922050 |
| H | 1.2144833  | 1.6770868  | -3.7567340 |
| H | -3.1577523 | 1.9903472  | -1.7488572 |
| H | 2.1205888  | 4.6565662  | -1.6562708 |
| C | 5.5799733  | 1.4516824  | 0.5391978  |
| C | 4.2256183  | 1.5458502  | 0.8639084  |
| C | 3.7035090  | 2.7715363  | 1.3504516  |
| C | 4.5554860  | 3.8918097  | 1.5115378  |
| C | 5.9120719  | 3.7875904  | 1.1896414  |
| C | 6.4207576  | 2.5692081  | 0.7018501  |
| H | 5.9860601  | 0.5027723  | 0.1589990  |
| H | 3.5515984  | 0.6878694  | 0.7348845  |
| C | 2.2958672  | 2.8881850  | 1.6848474  |
| H | 4.1436802  | 4.8366541  | 1.8986966  |
| H | 6.5787305  | 4.6532866  | 1.3168673  |
| H | 7.4883357  | 2.4899802  | 0.4442536  |
| O | 1.5177472  | 1.9103500  | 1.6861411  |
| H | 1.8807678  | 3.8888553  | 1.9585403  |
| C | -0.5615765 | 0.7321740  | 5.7752487  |
| C | -1.0785327 | 0.4461474  | 4.5558858  |
| C | -2.4690588 | 0.9991347  | 4.5190500  |
| O | -2.7525735 | 1.5570072  | 5.7341395  |
| C | -1.5940001 | 1.4729368  | 6.5712335  |
| O | -3.2472868 | 0.9817200  | 3.5836240  |
| C | -0.5648320 | -0.2098633 | 3.3342117  |
| H | -1.8726292 | 0.9651329  | 7.5222311  |
| H | -1.2688181 | 2.5084902  | 6.8241003  |
| H | -1.4193415 | -0.5441953 | 2.7112339  |
| H | -0.0610894 | -1.1663208 | 3.6188292  |



H 0.4500193 0.5080024 6.1407749

int1; COSMO

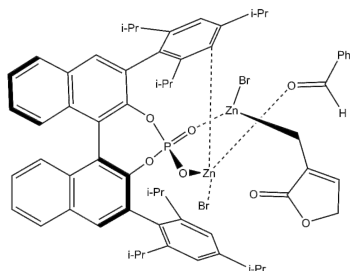

Energy (Hartree) = -11970.03195074

|    |            |            |            |
|----|------------|------------|------------|
| Zn | 3.2361673  | -0.6222103 | 0.7912492  |
| Br | 5.1719942  | -1.7112377 | -0.0008953 |
| Zn | -0.5938955 | 2.7170864  | -0.1794917 |
| Br | -2.7304805 | 2.6920565  | 0.8400029  |
| C  | -0.8675742 | -0.5672291 | 2.8134827  |
| C  | -2.1051578 | -1.2076834 | 2.7221739  |
| C  | -2.4899065 | -2.0686253 | 3.8177491  |
| C  | -3.6464138 | -2.9039847 | 3.7723643  |
| C  | -1.6618222 | -2.1177018 | 5.0015245  |
| C  | -2.0639374 | -2.9331264 | 6.1018276  |
| C  | -0.4259047 | -1.4063983 | 5.0334518  |
| H  | 0.2128174  | -1.4883863 | 5.9266867  |
| C  | 0.0109817  | -0.6777372 | 3.9367811  |
| C  | -3.1707172 | -1.0854355 | -0.9731332 |
| C  | -4.5281048 | -0.8138727 | -0.8498021 |
| H  | -5.1515278 | -0.7695964 | -1.7553446 |
| C  | -5.1295543 | -0.5349199 | 0.4094387  |
| C  | -6.5008219 | -0.1493753 | 0.4990946  |
| C  | -4.3316394 | -0.5919702 | 1.6093657  |
| C  | -4.9314070 | -0.1804899 | 2.8368253  |
| C  | -2.9545531 | -1.0119679 | 1.5131691  |
| C  | -2.4140000 | -1.1900322 | 0.2336981  |
| O  | -0.4470490 | 0.2666739  | 1.7893003  |
| O  | -1.0671961 | -1.5353980 | 0.1014414  |
| P  | 0.0520644  | -0.3646678 | 0.3515537  |
| O  | 1.3684223  | -1.1459473 | 0.4912079  |
| O  | -0.0361733 | 0.8106356  | -0.6243070 |
| C  | -3.2139876 | -3.7054014 | 6.0359029  |
| C  | -3.9993137 | -3.7015358 | 4.8526252  |
| H  | -1.4293204 | -2.9501851 | 7.0019000  |
| H  | -3.5090886 | -4.3341808 | 6.8896747  |
| H  | -4.2603719 | -2.9170888 | 2.8614833  |
| H  | -4.8938066 | -4.3397287 | 4.7879808  |
| C  | -6.2615725 | 0.2125021  | 2.8882300  |
| C  | -7.0617779 | 0.2118418  | 1.7145455  |
| H  | -4.3216421 | -0.1563866 | 3.7502045  |
| H  | -6.6964750 | 0.5366939  | 3.8460609  |
| H  | -8.1175466 | 0.5183313  | 1.7690150  |
| H  | -7.0999195 | -0.1221342 | -0.4247481 |
| C  | 2.4688408  | -0.9748528 | 3.5048218  |
| C  | 1.3783980  | -0.1018337 | 3.7561400  |
| C  | 3.6933027  | -0.4120300 | 3.0437321  |
| C  | 1.5436573  | 1.3093831  | 3.6337129  |
| C  | 2.7699843  | 1.8239125  | 3.1765358  |
| C  | 3.8600261  | 0.9913749  | 2.8653186  |
| H  | 4.5806099  | -1.0618718 | 2.9568698  |
| C  | 0.4142820  | 2.2450066  | 4.0514888  |
| H  | 2.8815140  | 2.9094062  | 3.0577233  |

|   |            |            |            |
|---|------------|------------|------------|
| C | 0.4128004  | 3.5977731  | 3.3334556  |
| H | 1.2751338  | 4.2342502  | 3.6213775  |
| H | -0.5114750 | 4.1565062  | 3.5788050  |
| H | 0.4326423  | 3.4680999  | 2.2340643  |
| C | 0.4450689  | 2.4208574  | 5.5843640  |
| H | -0.5429904 | 1.7468748  | 3.7968434  |
| H | 1.3904928  | 2.9045019  | 5.9073224  |
| H | 0.3650969  | 1.4457868  | 6.1058875  |
| H | -0.3993575 | 3.0582735  | 5.9170360  |
| C | 5.2167193  | 1.5351870  | 2.4346844  |
| C | 5.1555247  | 2.9254058  | 1.7906582  |
| H | 6.1477903  | 3.1929903  | 1.3754735  |
| H | 4.8979168  | 3.7077485  | 2.5351919  |
| H | 4.4167223  | 2.9839834  | 0.9675765  |
| C | 6.1879104  | 1.5161129  | 3.6337642  |
| H | 5.6149475  | 0.8184086  | 1.6795951  |
| H | 7.1975350  | 1.8489328  | 3.3181760  |
| H | 6.2835006  | 0.5019731  | 4.0710782  |
| H | 5.8349028  | 2.2004839  | 4.4333783  |
| C | 2.3903125  | -2.4775981 | 3.7584526  |
| C | 2.8745086  | -3.3414829 | 2.5842328  |
| H | 2.7556868  | -4.4153387 | 2.8334825  |
| H | 3.9440127  | -3.1778553 | 2.3397581  |
| H | 2.2762059  | -3.1423261 | 1.6723151  |
| C | 3.1481249  | -2.8141810 | 5.0587629  |
| H | 1.3244337  | -2.7282798 | 3.9218205  |
| H | 3.0384973  | -3.8907679 | 5.3016986  |
| H | 2.7665516  | -2.2257703 | 5.9179070  |
| H | 4.2324913  | -2.5984712 | 4.9584433  |
| H | -0.5487506 | -0.6231509 | -6.6585847 |
| H | -2.6846490 | -5.1282736 | -3.4872662 |
| H | -4.5621927 | 2.6346491  | -3.0665118 |
| C | -0.5907115 | -1.6432952 | -6.2150319 |
| H | -0.8831733 | -5.2408746 | -0.8537444 |
| H | 1.3424725  | -2.1873370 | -7.0978653 |
| H | -2.1420527 | 3.3345048  | -2.5238625 |
| C | -1.2557165 | -1.5029483 | -4.8511018 |
| C | -3.0820866 | -4.7691449 | -2.5147907 |
| C | 0.8544824  | -2.1607898 | -6.1015095 |
| H | 0.8831923  | -3.1913121 | -5.6903065 |
| C | -1.3816852 | -2.6016300 | -3.9829586 |
| C | -4.2009627 | 1.6473683  | -3.4218096 |
| H | -2.4585109 | -2.1289142 | -7.2722092 |
| C | -1.7691136 | -0.2688861 | -4.4197608 |
| C | -1.4289580 | -2.5245574 | -7.1593982 |
| H | -0.9665840 | -2.5789088 | -8.1669017 |
| H | -1.6876680 | 0.6000535  | -5.0936742 |
| C | -0.7618874 | -4.3750923 | -1.5372486 |
| H | -3.2189056 | -5.6547191 | -1.8600119 |
| H | -4.0800169 | -4.3236114 | -2.7037873 |
| C | -1.9982300 | -2.4956738 | -2.7236241 |
| C | -1.8263612 | 2.3916502  | -3.0181749 |
| C | -2.3764550 | -0.1001656 | -3.1604135 |
| H | -4.9876707 | 0.8996332  | -3.2008561 |
| H | -4.0906334 | 1.6989852  | -4.5259037 |
| C | -2.1303812 | -3.7496002 | -1.8612007 |
| C | -2.5065334 | -1.2333421 | -2.3074776 |
| C | -2.8634255 | 1.2876551  | -2.7492162 |
| H | -0.0973370 | -3.6383320 | -1.0451177 |
| H | -0.8204291 | 2.1115248  | -2.6434815 |
| H | -0.2535833 | -4.7446938 | -2.4523895 |
| H | 1.4639910  | -1.5167498 | -5.4361787 |
| H | -1.7104966 | 2.6165990  | -4.0992735 |
| H | -1.5082483 | -3.5611113 | -6.7696929 |
| H | -2.5920045 | -3.4519800 | -0.8982034 |
| H | -3.0299128 | 1.2742324  | -1.6529940 |
| H | -0.9899716 | -3.5821725 | -4.2980310 |
| C | 1.6976959  | 1.2429547  | -4.5129915 |
| C | 2.0820144  | 1.1450237  | -3.1731567 |
| C | 3.4382911  | 1.3555958  | -2.8219529 |
| C | 4.3933395  | 1.6679345  | -3.8160645 |



|   |            |           |            |
|---|------------|-----------|------------|
| C | 4.0003977  | 1.7613002 | -5.1558462 |
| C | 2.6539142  | 1.5483619 | -5.5028290 |
| H | 0.6471366  | 1.0733151 | -4.7892513 |
| H | 1.3563300  | 0.9014366 | -2.3808057 |
| C | 3.8664165  | 1.2309168 | -1.4341472 |
| H | 5.4415193  | 1.8409093 | -3.5262015 |
| H | 4.7399412  | 2.0028684 | -5.9337106 |
| H | 2.3444027  | 1.6163186 | -6.5575635 |
| O | 3.0824589  | 0.9529333 | -0.5058962 |
| H | 4.9610793  | 1.3386176 | -1.2329810 |
| C | 0.7239749  | 4.8634768 | -2.9961649 |
| C | 1.2088670  | 4.4984166 | -1.7755823 |
| C | 2.6757916  | 4.2841373 | -1.9552503 |
| O | 3.0110259  | 4.5190305 | -3.2651576 |
| C | 1.8335359  | 4.8837178 | -3.9955922 |
| O | 3.5184512  | 3.9578346 | -1.1337952 |
| C | 0.5709668  | 4.3310896 | -0.4592348 |
| H | 1.6923123  | 4.1482314 | -4.8210984 |
| H | 1.9992826  | 5.8814612 | -4.4616488 |
| H | -0.1348369 | 5.1604331 | -0.2458265 |
| H | 1.3519580  | 4.3221186 | 0.3284190  |
| H | -0.3167259 | 5.1082276 | -3.2494721 |

## int1

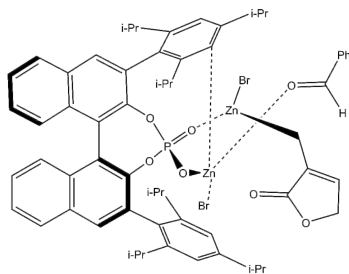

Energy (Hartree) = -11970.01909369

|    |            |            |            |
|----|------------|------------|------------|
| Zn | 3.2498188  | -0.6352824 | 0.7935632  |
| Br | 5.2170705  | -1.6875105 | 0.0602005  |
| Zn | -0.5811219 | 2.7215636  | -0.1546162 |
| Br | -2.7143160 | 2.6941862  | 0.8428574  |
| C  | -0.8655184 | -0.5670813 | 2.8177148  |
| C  | -2.1014363 | -1.2102144 | 2.7227588  |
| C  | -2.4886547 | -2.0708144 | 3.8174552  |
| C  | -3.6438601 | -2.9073612 | 3.7684814  |
| C  | -1.6654522 | -2.1176868 | 5.0044537  |
| C  | -2.0711333 | -2.9328539 | 6.1030372  |
| C  | -0.4319591 | -1.4029702 | 5.0403799  |
| H  | 0.2039620  | -1.4819991 | 5.9360624  |
| C  | 0.0081112  | -0.6737256 | 3.9454365  |
| C  | -3.1567777 | -1.0850867 | -0.9747800 |
| C  | -4.5149549 | -0.8172931 | -0.8534897 |
| H  | -5.1348266 | -0.7729518 | -1.7614343 |
| C  | -5.1205837 | -0.5412909 | 0.4038108  |
| C  | -6.4923979 | -0.1591219 | 0.4912897  |
| C  | -4.3250127 | -0.5974581 | 1.6050090  |
| C  | -4.9280767 | -0.1876427 | 2.8311572  |
| C  | -2.9470778 | -1.0152383 | 1.5112815  |
| C  | -2.4021211 | -1.1905825 | 0.2331196  |
| O  | -0.4430648 | 0.2656394  | 1.7950637  |
| O  | -1.0550294 | -1.5343513 | 0.1032034  |
| P  | 0.0647389  | -0.3645213 | 0.3590533  |
| O  | 1.3784671  | -1.1478165 | 0.5128925  |
| O  | -0.0154466 | 0.8113595  | -0.6157413 |
| C  | -3.2194821 | -3.7063681 | 6.0335262  |
| C  | -4.0000125 | -3.7039953 | 4.8477431  |
| H  | -1.4401194 | -2.9483770 | 7.0057111  |
| H  | -3.5169461 | -4.3347134 | 6.8867352  |

|   |            |            |            |
|---|------------|------------|------------|
| H | -4.2538956 | -2.9200955 | 2.8550911  |
| H | -4.8938294 | -4.3427306 | 4.7801722  |
| C | -6.2589760 | 0.2015153  | 2.8798993  |
| C | -7.0566507 | 0.1994675  | 1.7052679  |
| H | -4.3193068 | -0.1612104 | 3.7449489  |
| H | -6.6959620 | 0.5253019  | 3.8368025  |
| H | -8.1129579 | 0.5041525  | 1.7575278  |
| H | -7.0890009 | -0.1313955 | -0.4340776 |
| C | 2.4696588  | -0.9622675 | 3.5287439  |
| C | 1.3740556  | -0.0931226 | 3.7702308  |
| C | 3.6920991  | -0.3969548 | 3.0678664  |
| C | 1.5326954  | 1.3183848  | 3.6387429  |
| C | 2.7572395  | 1.8342724  | 3.1794958  |
| C | 3.8523799  | 1.0045547  | 2.8776500  |
| H | 4.5812012  | -1.0439287 | 2.9798818  |
| C | 0.3963458  | 2.2509802  | 4.0462566  |
| H | 2.8635968  | 2.9188929  | 3.0497070  |
| C | 0.4131550  | 3.6155582  | 3.3513558  |
| H | 1.2660976  | 4.2482267  | 3.6744431  |
| H | -0.5189044 | 4.1685662  | 3.5787977  |
| H | 0.4631080  | 3.5056369  | 2.2509933  |
| C | 0.3906156  | 2.4028753  | 5.5817996  |
| H | -0.5563278 | 1.7611050  | 3.7599570  |
| H | 1.3296940  | 2.8771865  | 5.9355424  |
| H | 0.2933353  | 1.4207816  | 6.0865625  |
| H | -0.4586709 | 3.0389334  | 5.9043832  |
| C | 5.2077668  | 1.5514651  | 2.4464812  |
| C | 5.1427865  | 2.9358148  | 1.7905920  |
| H | 6.1355385  | 3.2065627  | 1.3786984  |
| H | 4.8776671  | 3.7240471  | 2.5263492  |
| H | 4.4101677  | 2.9857747  | 0.9615455  |
| C | 6.1756492  | 1.5465062  | 3.6481684  |
| H | 5.6106774  | 0.8295671  | 1.6987405  |
| H | 7.1852938  | 1.8803251  | 3.3336936  |
| H | 6.2742472  | 0.5368203  | 4.0948819  |
| H | 5.8185839  | 2.2359320  | 4.4416347  |
| C | 2.3981517  | -2.4649279 | 3.7877308  |
| C | 2.8613216  | -3.3298634 | 2.6054073  |
| H | 2.7535410  | -4.4039923 | 2.8588042  |
| H | 3.9242380  | -3.1620701 | 2.3356621  |
| H | 2.2423254  | -3.1357271 | 1.7065587  |
| C | 3.1789444  | -2.7990870 | 5.0746393  |
| H | 1.3357236  | -2.7164183 | 3.9709763  |
| H | 3.0749169  | -3.8751060 | 5.3226867  |
| H | 2.8132611  | -2.2087827 | 5.9394577  |
| H | 4.2615894  | -2.5841296 | 4.9561994  |
| H | -0.5759169 | -0.6071153 | -6.6771369 |
| H | -2.6639305 | -5.1222675 | -3.4923798 |
| H | -4.5543629 | 2.6462701  | -3.0467407 |
| C | -0.6203604 | -1.6295787 | -6.2382624 |
| H | -0.8409222 | -5.2276737 | -0.8708935 |
| H | 1.2950767  | -2.1848748 | -7.1532926 |
| H | -2.1313155 | 3.3356703  | -2.5059195 |
| C | -1.2661357 | -1.4906717 | -4.8649312 |
| C | -3.0548570 | -4.7655628 | -2.5164670 |
| C | 0.8215831  | -2.1602462 | -6.1499175 |
| H | 0.8476835  | -3.1938710 | -5.7468701 |
| C | -1.3771697 | -2.5892986 | -3.9954504 |
| C | -4.1963363 | 1.6610941  | -3.4103655 |
| H | -2.5082403 | -2.0914970 | -7.2696713 |
| C | -1.7799554 | -0.2592496 | -4.4275347 |
| C | -1.4809949 | -2.4971372 | -7.1750588 |
| H | -1.0348524 | -2.5520622 | -8.1898254 |
| H | -1.7108559 | 0.6103939  | -5.1022038 |
| C | -0.7292506 | -4.3610503 | -1.5548249 |
| H | -3.1830868 | -5.6527066 | -1.8621569 |
| H | -4.0558857 | -4.3244221 | -2.6981044 |
| C | -1.9833038 | -2.4872646 | -2.7311311 |
| C | -1.8185454 | 2.3959351  | -3.0079052 |
| C | -2.3747387 | -0.0930390 | -3.1621489 |
| H | -4.9843630 | 0.9141991  | -3.1919471 |

|   |            |            |            |
|---|------------|------------|------------|
| H | -4.0902738 | 1.7187136  | -4.5145852 |
| C | -2.1029857 | -3.7425022 | -1.8689842 |
| C | -2.4939376 | -1.2278169 | -2.3100797 |
| C | -2.8585503 | 1.2936472  | -2.7432735 |
| H | -0.0642369 | -3.6219410 | -1.0673238 |
| H | -0.8135773 | 2.1108096  | -2.6348860 |
| H | -0.2247544 | -4.7279728 | -2.4730800 |
| H | 1.4468940  | -1.5280788 | -5.4882357 |
| H | -1.7038998 | 2.6270411  | -4.0881252 |
| H | -1.5656397 | -3.5343382 | -6.7886584 |
| H | -2.5592790 | -3.4476819 | -0.9026726 |
| H | -3.0223344 | 1.2773083  | -1.6466420 |
| H | -0.9832007 | -3.5677673 | -4.3138266 |
| C | 1.6827265  | 1.2098023  | -4.5253095 |
| C | 2.0755566  | 1.1103919  | -3.1878189 |
| C | 3.4329787  | 1.3216269  | -2.8445997 |
| C | 4.3806209  | 1.6371717  | -3.8434910 |
| C | 3.9800234  | 1.7323928  | -5.1805850 |
| C | 2.6322623  | 1.5176521  | -5.5200324 |
| H | 0.6306125  | 1.0365378  | -4.7931431 |
| H | 1.3544735  | 0.8663223  | -2.3912688 |
| C | 3.8666440  | 1.1979703  | -1.4564487 |
| H | 5.4292031  | 1.8147216  | -3.5582307 |
| H | 4.7146643  | 1.9774220  | -5.9620261 |
| H | 2.3167045  | 1.5844962  | -6.5731932 |
| O | 3.0842516  | 0.9232223  | -0.5279933 |
| H | 4.9626291  | 1.2990669  | -1.2583539 |
| C | 0.7468217  | 4.8621688  | -2.9713775 |
| C | 1.2392591  | 4.4804475  | -1.7590316 |
| C | 2.7000983  | 4.2353332  | -1.9596050 |
| O | 3.0230713  | 4.4727499  | -3.2732794 |
| C | 1.8454133  | 4.8642858  | -3.9845887 |
| O | 3.5432851  | 3.8802774  | -1.1528492 |
| C | 0.6164720  | 4.3138544  | -0.4368845 |
| H | 1.6789484  | 4.1352288  | -4.8118702 |
| H | 2.0261034  | 5.8608459  | -4.4491501 |
| H | -0.0712484 | 5.1536307  | -0.2065681 |
| H | 1.4084179  | 4.2841243  | 0.3391151  |
| H | -0.2926623 | 5.1270356  | -3.2089177 |

|   |            |            |            |
|---|------------|------------|------------|
| C | -4.6102617 | -2.2686772 | -2.0454941 |
| C | -5.9546233 | -2.6431659 | -2.3471679 |
| C | -3.9625871 | -2.8342392 | -0.8854783 |
| C | -4.7301374 | -3.6860073 | -0.0347598 |
| C | -2.5860868 | -2.4891031 | -0.6162342 |
| C | -1.9946581 | -1.5032650 | -1.4162168 |
| O | -1.2411884 | -0.9028356 | 1.2780622  |
| O | -0.6680933 | -1.1361302 | -1.1749382 |
| P | -0.3747647 | -0.1561197 | 0.1023240  |
| O | 1.1423743  | -0.2383085 | 0.3511611  |
| O | -1.0068749 | 1.2355132  | -0.0471513 |
| C | -1.4244480 | -7.3433808 | 1.0751714  |
| C | -2.0505199 | -6.8415792 | -0.0971787 |
| H | -0.3739020 | -6.8360805 | 2.8996818  |
| H | -1.3432488 | -8.4296565 | 1.2328799  |
| H | -2.6509558 | -5.1028794 | -1.2200546 |
| H | -2.4383516 | -7.5421438 | -0.8524375 |
| C | -6.0435145 | -4.0131565 | -0.3437788 |
| C | -6.6580095 | -3.5052652 | -1.5195843 |
| H | -4.2733589 | -4.0791222 | 0.8837408  |
| H | -6.6146248 | -4.6670469 | 0.3328551  |
| H | -7.6966776 | -3.7795666 | -1.7591263 |
| H | -6.4304176 | -2.2133949 | -3.2426703 |
| C | 2.0104155  | -1.9701871 | 2.9450724  |
| C | 0.6114821  | -1.8545798 | 3.2040232  |
| C | 2.8931203  | -1.1078395 | 3.6215856  |
| C | 0.1348637  | -0.8547754 | 4.0962493  |
| C | 1.0643901  | -0.0152699 | 4.7431236  |
| C | 2.4519800  | -0.1372395 | 4.5367880  |
| H | 3.9746286  | -1.1941130 | 3.4337017  |
| C | -1.3495309 | -0.7023290 | 4.4242840  |
| O | 0.6898690  | 0.7466309  | 5.4454368  |
| C | -1.8906468 | 0.6947754  | 4.0677265  |
| H | -1.3493872 | 1.5059685  | 4.5978457  |
| H | -2.9633333 | 0.7736749  | 4.3400770  |
| H | -1.8084677 | 0.8797703  | 2.9789319  |
| C | -1.6197050 | -1.0510853 | 5.9006727  |
| H | -1.9061056 | -1.4401890 | 3.8102111  |
| H | -1.1165366 | -0.3355728 | 6.5838945  |
| H | -1.2530262 | -2.0681562 | 6.1480053  |
| H | -2.7070660 | -1.0136780 | 6.1183597  |
| C | 3.4603026  | 0.6962129  | 5.3180792  |
| C | 3.2412670  | 2.2074731  | 5.1562965  |
| H | 4.0119373  | 2.7770925  | 5.7153736  |
| H | 2.2506127  | 2.5191896  | 5.5448806  |
| H | 3.3085689  | 2.5020290  | 4.0902127  |
| C | 3.4628175  | 0.2859005  | 6.8030428  |
| H | 4.4612098  | 0.4575542  | 4.8970995  |
| H | 4.2448092  | 0.8391082  | 7.3634276  |
| H | 3.6540186  | -0.7997707 | 6.9228951  |
| H | 2.4850700  | 0.5108895  | 7.2785458  |
| C | 2.5999963  | -3.0054146 | 1.9836336  |
| C | 3.5630355  | -2.3942754 | 0.9501015  |
| H | 3.9247220  | -3.1828544 | 0.2579509  |
| H | 4.4530810  | -1.9309055 | 1.4222559  |
| H | 3.0517232  | -1.6152074 | 0.3546988  |
| C | 3.2870189  | -4.1417064 | 2.7662624  |
| H | 1.7626876  | -3.4525533 | 1.4120651  |
| H | 3.6655699  | -4.9228048 | 2.0747324  |
| H | 2.5936255  | -4.6259964 | 3.4829913  |
| H | 4.1504303  | -3.7565244 | 3.3483229  |
| H | 0.0056694  | 4.6401169  | -3.9026283 |
| H | 0.0758678  | -0.6737191 | -6.4327155 |
| H | -5.9862967 | 2.1845162  | -2.2777937 |
| C | -0.2319615 | 3.9942455  | -4.7809295 |
| H | 1.6168251  | -2.1943304 | -4.0901357 |
| H | 1.4822777  | 4.7664890  | -5.8912745 |
| H | -4.6299199 | 2.9791023  | -0.2932187 |
| C | -0.8233433 | 2.7082122  | -4.2057460 |
| C | -0.4559461 | -1.4095126 | -5.7934680 |
| C | 1.0553919  | 3.7896417  | -5.5870275 |

## int2; COSMO

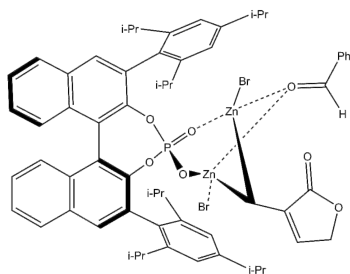

Energy (Hartree) = -11970.02986471

|    |            |            |            |
|----|------------|------------|------------|
| Zn | 2.1076671  | 1.3410717  | 1.1000156  |
| Br | 4.4159084  | 1.4974195  | 1.2947036  |
| Zn | 0.0698680  | 2.9046435  | 0.1310470  |
| Br | -0.3476339 | 5.0462455  | -0.6656454 |
| C  | -1.1273253 | -2.2860308 | 1.4027474  |
| C  | -1.8066250 | -3.1070294 | 0.4941836  |
| C  | -1.6756944 | -4.5366670 | 0.6520190  |
| C  | -2.1722615 | -5.4740166 | -0.3036071 |
| C  | -0.9824289 | -5.0491763 | 1.8106833  |
| C  | -0.8938675 | -6.4610585 | 2.0041289  |
| C  | -0.3278104 | -4.1468756 | 2.6973144  |
| H  | 0.2488065  | -4.5578235 | 3.5399496  |
| C  | -0.3197530 | -2.7742899 | 2.4751042  |
| C  | -2.6578507 | -0.8406660 | -2.4948220 |
| C  | -3.9296080 | -1.2922989 | -2.8278279 |
| H  | -4.4558452 | -0.8373319 | -3.6804588 |

|   |            |            |            |
|---|------------|------------|------------|
| H | 0.8637902  | 3.2083555  | -6.5134360 |
| C | -0.3055374 | 1.4307523  | -4.4762005 |
| C | -5.0577172 | 2.1074187  | -2.8807027 |
| H | -2.1946861 | 4.9713958  | -5.0641535 |
| C | -1.9525269 | 2.7879294  | -3.3674585 |
| C | -1.2709222 | 4.7502753  | -5.6337577 |
| H | -0.8573853 | 5.7149499  | -5.9935067 |
| H | -2.3538289 | 3.7813780  | -3.1165336 |
| C | 1.2119724  | -1.1821486 | -3.8824847 |
| H | -0.0572213 | -2.4163451 | -6.0366925 |
| H | -1.5279961 | -1.3863764 | -6.0761977 |
| C | -0.8820656 | 0.2592249  | -3.9427103 |
| C | -3.7099009 | 2.9437544  | -0.9120693 |
| C | -2.5801286 | 1.6542253  | -2.8285135 |
| H | -5.2019595 | 1.3042804  | -3.6309159 |
| H | -4.9324827 | 3.0604470  | -3.4365760 |
| C | -0.2668236 | -1.0925949 | -4.2981102 |
| C | -2.0355866 | 0.3668950  | -3.1254422 |
| C | -3.8371751 | 1.8414951  | -1.9762019 |
| H | 1.3291545  | -0.9822867 | -2.7999015 |
| H | -2.8517359 | 2.7510817  | -0.2424224 |
| H | 1.8412876  | -0.4544436 | -4.4364448 |
| H | 1.8310246  | 3.2452843  | -5.0138462 |
| H | -3.5733971 | 3.9503230  | -1.3572009 |
| H | -1.5580204 | 4.1478272  | -6.5212881 |
| H | -0.8159066 | -1.8716332 | -3.7305703 |
| H | -4.0201209 | 0.8925693  | -1.4332032 |
| H | 0.5753627  | 1.3266589  | -5.1265263 |
| C | 4.8840533  | -0.0168350 | -2.7545924 |
| C | 3.8118128  | 0.6526208  | -2.1630720 |
| C | 3.4586671  | 1.9509317  | -2.6148710 |
| C | 4.1962633  | 2.5669749  | -3.6570823 |
| C | 5.2729853  | 1.8917031  | -4.2397755 |
| C | 5.6127109  | 0.6013514  | -3.7898019 |
| H | 5.1582089  | -1.0252058 | -2.4108906 |
| H | 3.2244236  | 0.1856660  | -1.3606742 |
| C | 2.3419883  | 2.6544195  | -2.0171508 |
| C | 3.9227423  | 3.5786471  | -3.9945649 |
| H | 5.8520248  | 2.3658512  | -5.0458567 |
| H | 6.4575829  | 0.0690520  | -4.2535078 |
| O | 1.7275961  | 2.2219469  | -1.0165908 |
| H | 2.0150800  | 3.6251655  | -2.4630561 |
| C | 2.2587732  | 4.7124218  | 2.2613900  |
| C | 1.3306759  | 3.8536554  | 2.7404500  |
| C | 0.8763590  | 4.3754961  | 4.0627941  |
| O | 1.5608832  | 5.5383397  | 4.3284445  |
| C | 2.4536371  | 5.8212913  | 3.2439775  |
| O | 0.0615391  | 3.9062008  | 4.8348413  |
| C | 0.7746423  | 2.5920721  | 2.1793509  |
| H | 3.4950571  | 5.8702583  | 3.6347148  |
| H | 2.2065960  | 6.8200981  | 2.8192789  |
| H | -0.3380085 | 2.6087264  | 2.2895796  |
| H | 0.9513598  | 1.7628123  | 2.9190823  |
| H | 2.8083675  | 4.6334841  | 1.3131132  |

int2

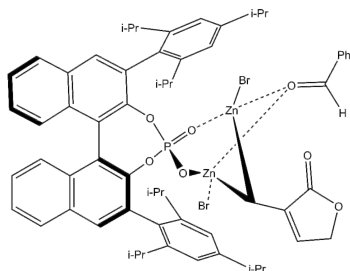

Energy (Hartree) = -11970.01648094

|    |           |           |           |
|----|-----------|-----------|-----------|
| Zn | 2.0818587 | 1.3459995 | 1.1310308 |
| Br | 4.3843493 | 1.5436408 | 1.2943824 |
| Zn | 0.0661310 | 2.9016234 | 0.1023722 |

|    |            |            |            |
|----|------------|------------|------------|
| Br | -0.2987595 | 5.0332521  | -0.7368226 |
| C  | -1.1437022 | -2.2803395 | 1.4115719  |
| C  | -1.8250602 | -3.1030346 | 0.5060042  |
| C  | -1.6972643 | -4.5323672 | 0.6683283  |
| C  | -2.1991648 | -5.4716720 | -0.2822663 |
| C  | -1.0016026 | -5.0429370 | 1.8262490  |
| C  | -0.9168104 | -6.4540297 | 2.0235010  |
| C  | -0.3408109 | -4.1391879 | 2.7064337  |
| H  | 0.2412547  | -4.5475765 | 3.5466209  |
| C  | -0.3312336 | -2.7674295 | 2.4809970  |
| C  | -2.6587184 | -0.8426202 | -2.4917565 |
| C  | -3.9316612 | -1.2895895 | -2.8260965 |
| H  | -4.4531650 | -0.8325598 | -3.6805281 |
| C  | -4.6188284 | -2.2608609 | -2.0436729 |
| C  | -5.9636177 | -2.6306285 | -2.3470704 |
| C  | -3.9765407 | -2.8263697 | -0.8808626 |
| C  | -4.7495692 | -3.6730818 | -0.0304853 |
| C  | -2.5996740 | -2.4863688 | -0.6085621 |
| C  | -2.0012236 | -1.5056854 | -1.4098957 |
| O  | -1.2568541 | -0.8979368 | 1.2844093  |
| O  | -0.6748980 | -1.1426837 | -1.1648762 |
| P  | -0.3888760 | -0.1544620 | 0.1081888  |
| O  | 1.1274106  | -0.2309014 | 0.3638150  |
| O  | -1.0222144 | 1.2348090  | -0.0546129 |
| C  | -1.4531682 | -7.3379366 | 1.1001685  |
| C  | -2.0814232 | -6.8384455 | -0.0712494 |
| H  | -0.3946578 | -6.8273514 | 2.9184871  |
| H  | -1.3747961 | -8.4237983 | 1.2617610  |
| H  | -2.6797690 | -5.1013547 | -1.1979095 |
| H  | -2.4742748 | -7.5402268 | -0.8227062 |
| C  | -6.0628820 | -3.9958725 | -0.3422662 |
| C  | -6.6723535 | -3.4879349 | -1.5199856 |
| H  | -4.2953824 | -4.0656341 | 0.8894290  |
| H  | -6.6380311 | -4.6462217 | 0.3342689  |
| H  | -7.7115443 | -3.7582201 | -1.7615693 |
| H  | -6.4355467 | -2.2003666 | -3.2443684 |
| C  | 2.0039487  | -1.9627855 | 2.9184396  |
| C  | 0.6091262  | -1.8475716 | 3.1977530  |
| C  | 2.8944287  | -1.0957440 | 3.5773051  |
| C  | 0.1443413  | -0.8452037 | 4.0929657  |
| C  | 1.0816448  | 0.0000603  | 4.7216456  |
| C  | 2.4660613  | -0.1212453 | 4.4946545  |
| H  | 3.9731517  | -1.1803652 | 3.3735417  |
| C  | -1.3354629 | -0.6984707 | 4.4434590  |
| H  | 0.7158332  | 0.7665110  | 5.4234426  |
| C  | -1.8915035 | 0.6933665  | 4.0899432  |
| H  | -1.3482869 | 1.5115287  | 4.6070178  |
| H  | -2.9599611 | 0.7657547  | 4.3799175  |
| H  | -1.8312228 | 0.8720646  | 2.9987385  |
| C  | -1.5788734 | -1.0424677 | 5.9255286  |
| H  | -1.8964898 | -1.4432104 | 3.8415783  |
| H  | -1.0705004 | -0.3198664 | 6.5970327  |
| H  | -1.2003349 | -2.0552111 | 6.1722321  |
| H  | -2.6626206 | -1.0119214 | 6.1612839  |
| C  | 3.4907878  | 0.7032737  | 5.2640374  |
| C  | 3.2465007  | 2.2158202  | 5.1740910  |
| H  | 4.0377004  | 2.7716056  | 5.7179748  |
| H  | 2.2734563  | 2.5028972  | 5.6209904  |
| H  | 3.2623712  | 2.5527611  | 4.1186075  |
| C  | 3.5583047  | 0.2326174  | 6.7297506  |
| H  | 4.4770665  | 0.4974627  | 4.7939275  |
| H  | 4.3517672  | 0.7762751  | 7.2833156  |
| H  | 3.7710072  | -0.8534327 | 6.7972429  |
| H  | 2.5956124  | 0.4195299  | 7.2501372  |
| C  | 2.5820597  | -3.0016524 | 1.9538235  |
| C  | 3.5271456  | -2.3938382 | 0.9016277  |
| H  | 3.8883057  | -3.1873970 | 0.2148332  |
| H  | 4.4181099  | -1.9152715 | 1.3566445  |
| H  | 2.9991115  | -1.6280979 | 0.3035798  |
| C  | 3.2840831  | -4.1306429 | 2.7334502  |
| H  | 1.7381329  | -3.4555677 | 1.3975911  |

|   |            |            |            |
|---|------------|------------|------------|
| H | 3.6545473  | -4.9160512 | 2.0424752  |
| H | 2.6029471  | -4.6113992 | 3.4640731  |
| H | 4.1545865  | -3.7399703 | 3.3008372  |
| H | 0.0077115  | 4.6301759  | -3.9252282 |
| H | 0.1001635  | -0.7038813 | -6.4116530 |
| H | -5.9823653 | 2.2017995  | -2.3080797 |
| C | -0.2233627 | 3.9766693  | -4.7996759 |
| H | 1.6315504  | -2.2021592 | -4.0449397 |
| H | 1.4961852  | 4.7427907  | -5.9075364 |
| H | -4.6328542 | 2.9963891  | -0.3202827 |
| C | -0.8146112 | 2.6941935  | -4.2170165 |
| C | -0.4327171 | -1.4354868 | -5.7686660 |
| C | 1.0685030  | 3.7679471  | -5.5974695 |
| H | 0.8827286  | 3.1802869  | -6.5210060 |
| C | -0.2947572 | 1.4152936  | -4.4745801 |
| C | -5.0506924 | 2.1189191  | -2.9052441 |
| H | -2.1862098 | 4.9457906  | -5.1021697 |
| C | -1.9463559 | 2.7798345  | -3.3835354 |
| C | -1.2589822 | 4.7226623  | -5.6648796 |
| H | -0.8470379 | 5.6857200  | -6.0307334 |
| H | -2.3471476 | 3.7751891  | -3.1396786 |
| C | 1.2234722  | -1.1889110 | -3.8493054 |
| H | -0.0306278 | -2.4432537 | -6.0021855 |
| H | -1.5029785 | -1.4165189 | -6.0575675 |
| C | -0.8727584 | 0.2478469  | -3.9343943 |
| C | -3.7078299 | 2.9495809  | -0.9306112 |
| C | -2.5767476 | 1.6503893  | -2.8396705 |
| H | -5.1952947 | 1.3166416  | -3.6562769 |
| H | -4.9175148 | 3.0703242  | -3.4617377 |
| C | -0.2529062 | -1.1056819 | -4.2751564 |
| C | -2.0311454 | 0.3608512  | -3.1248685 |
| C | -3.8368680 | 1.8464998  | -1.9938326 |
| H | 1.3330868  | -0.9799622 | -2.7676573 |
| H | -2.8594362 | 2.7476025  | -0.2516350 |
| H | 1.8554153  | -0.4655741 | -4.4061734 |
| H | 1.8412619  | 3.2270875  | -5.0169416 |
| H | -3.5550159 | 3.9543547  | -1.3741463 |
| H | -1.5406995 | 4.1118956  | -6.5482075 |
| H | -0.8034854 | -1.8810443 | -3.7042576 |
| H | -4.0289678 | 0.8997958  | -1.4502491 |
| H | 0.5884346  | 1.3061722  | -5.1210279 |
| C | 4.9431748  | 0.0215806  | -2.7228315 |
| C | 3.8500216  | 0.6721968  | -2.1479772 |
| C | 3.4748555  | 1.9586795  | -2.6131451 |
| C | 4.2114431  | 2.5826912  | -3.6500277 |
| C | 5.3080930  | 1.9263218  | -4.2166972 |
| C | 5.6697548  | 0.6467949  | -3.7540302 |
| H | 5.2342760  | -0.9769890 | -2.3648932 |
| H | 3.2657696  | 0.2013456  | -1.3457352 |
| C | 2.3375726  | 2.6421312  | -2.0253167 |
| H | 3.9187701  | 3.5853506  | -3.9985295 |
| H | 5.8860112  | 2.4069522  | -5.0198373 |
| H | 6.5312819  | 0.1297841  | -4.2044238 |
| O | 1.7205511  | 2.1906245  | -1.0382874 |
| H | 2.0006953  | 3.6134164  | -2.4651170 |
| C | 2.1737902  | 4.7365631  | 2.2890933  |
| C | 1.2730273  | 3.8472488  | 2.7617227  |
| O | 0.8506044  | 4.3092151  | 4.1192294  |
| O | 1.5293321  | 5.4724329  | 4.4085486  |
| C | 2.3819456  | 5.8084721  | 3.3117279  |
| O | 0.0697587  | 3.7945719  | 4.8935442  |
| C | 0.7175360  | 2.6001955  | 2.1698795  |
| H | 3.4353727  | 5.8548165  | 3.6714232  |
| H | 2.1115295  | 6.8206239  | 2.9337868  |
| H | -0.3979778 | 2.6301587  | 2.2497077  |
| H | 0.8601298  | 1.7631484  | 2.9081247  |
| H | 2.6938446  | 4.7000058  | 1.3219155  |

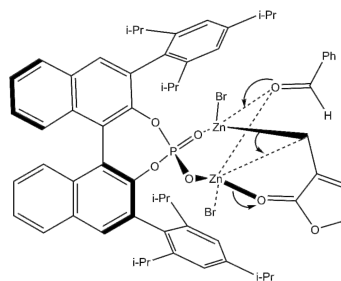

Energy (Hartree) = -11970.00808202

|    |            |            |            |
|----|------------|------------|------------|
| Zn | 3.3262936  | -0.0001498 | 0.7546997  |
| Br | 5.5747608  | 0.1627919  | 1.2048865  |
| Zn | -1.1357053 | 2.2099825  | 1.9269310  |
| Br | -3.3834886 | 1.7817716  | 1.4953109  |
| C  | -0.8836249 | -2.1805968 | 1.7152718  |
| C  | -1.9079601 | -2.6942235 | 0.9222621  |
| C  | -2.1770395 | -4.1106927 | 1.0051549  |
| C  | -3.1018067 | -4.7732218 | 0.1428292  |
| C  | -1.4606088 | -4.9040899 | 1.9773254  |
| C  | -1.7440088 | -6.2990716 | 2.0833328  |
| C  | -0.4556013 | -4.2961371 | 2.7854260  |
| H  | 0.0920218  | -4.9163197 | 3.5114720  |
| C  | -0.1248249 | -2.9553789 | 2.6448390  |
| C  | -2.6038570 | -0.2905082 | -1.9831260 |
| C  | -3.9957335 | -0.2823507 | -1.9878043 |
| H  | -4.5208147 | 0.2601077  | -2.7889061 |
| C  | -4.7614124 | -0.9225659 | -0.9758020 |
| C  | -6.1836230 | -0.8109509 | -0.9395985 |
| C  | -4.0871845 | -1.6885713 | 0.0419224  |
| C  | -4.8703606 | -2.2686992 | 1.0839720  |
| C  | -2.6513471 | -1.7971937 | -0.0041056 |
| C  | -1.9587928 | -1.0270214 | -0.9464792 |
| O  | -0.5898805 | -0.8180873 | 1.6368770  |
| O  | -0.5573077 | -1.0142241 | -0.9241060 |
| P  | 0.1785913  | -0.2238234 | 0.3133057  |
| O  | 1.6398720  | -0.7370447 | 0.2275743  |
| O  | -0.0402316 | 1.2839245  | 0.3376358  |
| C  | -2.6707774 | -6.9050866 | 1.2483060  |
| C  | -3.3423097 | -6.1354206 | 0.2612777  |
| H  | -1.1989518 | -6.8895397 | 2.8365145  |
| H  | -2.8762806 | -7.9826144 | 1.3383777  |
| H  | -3.6242536 | -4.1920568 | -0.6294338 |
| H  | -4.0571448 | -6.6228205 | -0.4191749 |
| C  | -6.2507370 | -2.1265301 | 1.1021756  |
| C  | -6.9174001 | -1.4029696 | 0.0768932  |
| H  | -4.3662673 | -2.8171098 | 1.8918971  |
| H  | -6.8328853 | -2.5702474 | 1.9242375  |
| H  | -8.0129983 | -1.3005942 | 0.1014385  |
| H  | -6.6855323 | -0.2276938 | -1.7275000 |
| C  | 2.3329886  | -2.4465770 | 2.8769849  |
| C  | 1.0012320  | -2.2606232 | 3.3371852  |
| C  | 3.3367833  | -1.5911619 | 3.3797334  |
| C  | 0.7115803  | -1.3003862 | 4.3445940  |
| C  | 1.7446973  | -0.4644997 | 4.8047617  |
| C  | 3.0607264  | -0.5735213 | 4.3178251  |
| H  | 4.3810361  | -1.7404666 | 3.0665292  |
| C  | -0.6725491 | -1.2392916 | 4.9900178  |
| H  | 1.5185440  | 0.2873274  | 5.5778266  |
| C  | -1.3289797 | 0.1475830  | 4.9516928  |
| H  | -0.7267806 | 0.9124728  | 5.4833486  |
| H  | -2.3272940 | 0.1155148  | 5.4332079  |
| H  | -1.4801271 | 0.4919448  | 3.9105466  |
| C  | -0.5904352 | -1.7805038 | 6.4316755  |
| H  | -1.3323618 | -1.9281017 | 4.4231352  |
| H  | 0.0493940  | -1.1330366 | 7.0671713  |
| H  | -0.1614202 | -2.8028685 | 6.4548896  |

## 7.9.2 Pathway 14j-ma ↔ 14d-mi

TS1; COSMO

|   |            |            |            |   |            |           |            |
|---|------------|------------|------------|---|------------|-----------|------------|
| H | -1.5985948 | -1.8173112 | 6.8935200  | O | 3.2451066  | 1.6225838 | -0.5710168 |
| C | 4.1687289  | 0.3473803  | 4.8108980  | H | 1.8265131  | 1.0492606 | -1.9425764 |
| C | 3.8869882  | 1.8115361  | 4.4352272  | C | 1.9299688  | 3.7173724 | 1.4703476  |
| H | 4.7305602  | 2.4685646  | 4.7294043  | C | 1.3542583  | 3.6503680 | 2.6956669  |
| H | 2.9763803  | 2.2002129  | 4.9348251  | C | 2.1387127  | 4.5599172 | 3.5911789  |
| H | 3.7465998  | 1.9211055  | 3.3401564  | O | 3.1712182  | 5.1149693 | 2.8615940  |
| C | 4.4103162  | 0.1903904  | 6.3227523  | C | 3.1222305  | 4.6186839 | 1.5209202  |
| H | 5.0971003  | 0.0416546  | 4.2824243  | O | 1.9702928  | 4.8152556 | 4.7667720  |
| H | 5.2633961  | 0.8202896  | 6.6485182  | C | 0.2346040  | 2.8271322 | 3.2168334  |
| H | 4.6365962  | -0.8618362 | 6.5893429  | H | 4.0702861  | 4.0731924 | 1.3028225  |
| H | 3.5221279  | 0.5053438  | 6.9093557  | H | 3.0596909  | 5.4772703 | 0.8142583  |
| C | 2.7092133  | -3.6050623 | 1.9525302  | H | -0.2142625 | 3.3303182 | 4.0985181  |
| C | 3.6763458  | -3.2424589 | 0.8153694  | H | 0.6633524  | 1.8772551 | 3.6134234  |
| H | 3.9395092  | -4.1495723 | 0.2340196  | H | 1.5937830  | 3.1847842 | 0.5736828  |
| H | 4.6273207  | -2.8031784 | 1.1794409  |   |            |           |            |
| H | 3.2028497  | -2.5366291 | 0.1024997  |   |            |           |            |
| C | 3.2786677  | -4.7608595 | 2.8017905  |   |            |           |            |
| H | 1.7764096  | -3.9693425 | 1.4768273  |   |            |           |            |
| H | 3.4840979  | -5.6503202 | 2.1709705  |   |            |           |            |
| H | 2.5742890  | -5.0613447 | 3.6033831  |   |            |           |            |
| H | 4.2292168  | -4.4609374 | 3.2906066  |   |            |           |            |
| H | -0.4446223 | 3.4837169  | -6.5058042 |   |            |           |            |
| H | -1.1448387 | -2.3348079 | -6.1269742 |   |            |           |            |
| H | -4.2554776 | 3.9843605  | -1.6697894 |   |            |           |            |
| C | -0.3936609 | 2.3867014  | -6.6884087 |   |            |           |            |
| H | 0.5993607  | -3.3376500 | -3.7094526 |   |            |           |            |
| H | 1.3590215  | 2.6228048  | -7.9804170 |   |            |           |            |
| H | -1.9031358 | 4.2125532  | -0.6667938 |   |            |           |            |
| C | -0.8411750 | 1.7043343  | -5.4005864 |   |            |           |            |
| C | -1.6434132 | -2.5895550 | -5.1685056 |   |            |           |            |
| C | 1.0517142  | 2.0438074  | -7.0855165 |   |            |           |            |
| H | 1.1605299  | 0.9688244  | -7.3388417 |   |            |           |            |
| C | -0.6706757 | 0.3218660  | -5.2050748 |   |            |           |            |
| C | -3.8258709 | 3.4281418  | -2.5280726 |   |            |           |            |
| H | -2.4111985 | 2.3579931  | -7.5674762 |   |            |           |            |
| C | -1.4756871 | 2.4339123  | -4.3797978 |   |            |           |            |
| C | -1.3747693 | 2.0686433  | -7.8336523 |   |            |           |            |
| H | -1.0916979 | 2.6070034  | -8.7619732 |   |            |           |            |
| H | -1.5854939 | 3.5251684  | -4.4969452 |   |            |           |            |
| C | 0.4857529  | -2.2385232 | -3.8121990 |   |            |           |            |
| H | -1.5696281 | -3.6889453 | -5.0381510 |   |            |           |            |
| H | -2.7161868 | -2.3265828 | -5.2667414 |   |            |           |            |
| C | -1.1752565 | -0.3454104 | -4.0729566 |   |            |           |            |
| C | -1.4946641 | 3.6732942  | -1.5472233 |   |            |           |            |
| C | -1.9637455 | 1.8234047  | -3.2077748 |   |            |           |            |
| H | -4.5985201 | 2.7212728  | -2.8929454 |   |            |           |            |
| H | -3.6278273 | 4.1583107  | -3.3413448 |   |            |           |            |
| C | -0.9981859 | -1.8600737 | -3.9761705 |   |            |           |            |
| C | -1.8615230 | 0.4093519  | -3.0793906 |   |            |           |            |
| C | -2.5469525 | 2.6922412  | -2.0968041 |   |            |           |            |
| H | 0.9156304  | -1.7672135 | -2.9064011 |   |            |           |            |
| H | -0.5869700 | 3.1302589  | -1.2191140 |   |            |           |            |
| H | 1.0848307  | -1.9204411 | -4.6913806 |   |            |           |            |
| H | 1.7671807  | 2.2705991  | -6.2693813 |   |            |           |            |
| H | -1.1926061 | 4.4324787  | -2.2993578 |   |            |           |            |
| H | -1.3768622 | 0.9813225  | -8.0582144 |   |            |           |            |
| H | -1.5271739 | -2.2079611 | -3.0666350 |   |            |           |            |
| H | -2.8173201 | 2.0270448  | -1.2531313 |   |            |           |            |
| H | -0.1564412 | -0.2697821 | -5.9788483 |   |            |           |            |
| C | 3.6059055  | 5.2551453  | -2.7298822 |   |            |           |            |
| C | 3.5811867  | 4.0571337  | -2.0141712 |   |            |           |            |
| C | 2.6306551  | 3.0594285  | -2.3490314 |   |            |           |            |
| C | 1.7195896  | 3.2701104  | -3.4082002 |   |            |           |            |
| C | 1.7447246  | 4.4782147  | -4.1155521 |   |            |           |            |
| C | 2.6844647  | 5.4669558  | -3.7771811 |   |            |           |            |
| H | 4.3419298  | 6.0336021  | -2.4790634 |   |            |           |            |
| H | 4.2908469  | 3.8617946  | -1.1966975 |   |            |           |            |
| C | 2.5536476  | 1.8218261  | -1.5868638 |   |            |           |            |
| H | 0.9799522  | 2.4945556  | -3.6592949 |   |            |           |            |
| H | 1.0277641  | 4.6511753  | -4.9316431 |   |            |           |            |
| H | 2.7035806  | 6.4157787  | -4.3351938 |   |            |           |            |

### TS1

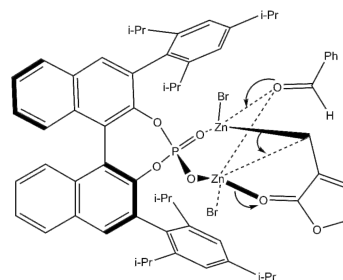

Energy (Hartree) = -11969.99371281  
number of imaginary frequencies: 1

|    |            |            |            |
|----|------------|------------|------------|
| Zn | 3.3223897  | 0.0092493  | 0.7722467  |
| Br | 5.5682057  | 0.1751842  | 1.2129471  |
| Zn | -1.1337008 | 2.2244038  | 1.9286472  |
| Br | -3.3765254 | 1.8138387  | 1.4805875  |
| C  | -0.8843768 | -2.1743025 | 1.7170115  |
| C  | -1.9067220 | -2.6889273 | 0.9220213  |
| C  | -2.1750477 | -4.1055806 | 1.0039883  |
| C  | -3.0976516 | -4.7683304 | 0.1399140  |
| C  | -1.4603756 | -4.8988278 | 1.9771471  |
| C  | -1.7434535 | -6.2935133 | 2.0816593  |
| C  | -0.4576979 | -4.2899401 | 2.7868741  |
| H  | 0.0895537  | -4.9093558 | 3.5138924  |
| C  | -0.1267748 | -2.9492030 | 2.6476871  |
| C  | -2.5985877 | -0.2885647 | -1.9860186 |
| C  | -3.9902873 | -0.2842824 | -1.9949104 |
| H  | -4.5131789 | 0.2565094  | -2.7984894 |
| C  | -4.7579612 | -0.9247141 | -0.9851110 |
| C  | -6.1801311 | -0.8172556 | -0.9535107 |
| C  | -4.0850386 | -1.6874185 | 0.0356293  |
| C  | -4.8699908 | -2.2684272 | 1.0754945  |
| C  | -2.6488807 | -1.7929317 | -0.0060645 |
| C  | -1.9546305 | -1.0223318 | -0.9468833 |
| O  | -0.5916806 | -0.8120623 | 1.6396415  |
| O  | -0.5533624 | -1.0078145 | -0.9213364 |
| P  | 0.1795953  | -0.2166243 | 0.3185010  |
| O  | 1.6408510  | -0.7330295 | 0.2379713  |
| O  | -0.0347216 | 1.2908182  | 0.3396924  |
| C  | -2.6678316 | -6.8997663 | 1.2450491  |
| C  | -3.3375575 | -6.1302767 | 0.2574845  |
| H  | -1.1994525 | -6.8838999 | 2.8356620  |
| H  | -2.8727634 | -7.9774089 | 1.3344473  |
| H  | -3.6189927 | -4.1864121 | -0.6323830 |
| H  | -4.0510191 | -6.6176170 | -0.4243671 |
| C  | -6.2503570 | -2.1303163 | 1.0884344  |
| C  | -6.9154138 | -1.4101396 | 0.0605635  |
| H  | -4.3665164 | -2.8138282 | 1.8856468  |
| H  | -6.8338639 | -2.5743553 | 1.9092192  |

|   |            |            |            |   |            |            |            |
|---|------------|------------|------------|---|------------|------------|------------|
| H | -8.0112283 | -1.3103569 | 0.0814902  | H | 1.1049286  | -1.9002817 | -4.6878290 |
| H | -6.6807691 | -0.2353391 | -1.7430960 | H | 1.7507297  | 2.2934362  | -6.2925817 |
| C | 2.3311217  | -2.4439624 | 2.8818108  | H | -1.2108344 | 4.4422838  | -2.3070112 |
| C | 0.9994418  | -2.2562801 | 3.3413796  | H | -1.3938139 | 0.9736565  | -8.0588878 |
| C | 3.3359614  | -1.5910927 | 3.3859920  | H | -1.5054480 | -2.2006976 | -3.0628057 |
| C | 0.7106453  | -1.2964517 | 4.3492497  | H | -2.8194693 | 2.0288427  | -1.2555530 |
| C | 1.7453838  | -0.4639867 | 4.8114336  | H | -0.1509810 | -0.2608794 | -5.9810954 |
| C | 3.0617240  | -0.5751511 | 4.3261906  | C | 3.5963014  | 5.2421478  | -2.7460657 |
| H | 4.3799999  | -1.7399760 | 3.0717711  | C | 3.5696828  | 4.0469276  | -2.0259387 |
| C | -0.6745421 | -1.2322631 | 4.9923161  | C | 2.6174967  | 3.0502042  | -2.3565197 |
| H | 1.5201690  | 0.2879638  | 5.5845604  | C | 1.7059775  | 3.2583956  | -3.4148731 |
| C | -1.3285448 | 0.1557713  | 4.9535195  | C | 1.7331350  | 4.4640292  | -4.1265803 |
| H | -0.7265002 | 0.9198146  | 5.4864292  | C | 2.6747503  | 5.4519081  | -3.7930887 |
| H | -2.3278504 | 0.1256809  | 5.4328023  | H | 4.3337549  | 6.0202975  | -2.4981907 |
| H | -1.4782594 | 0.5014088  | 3.9127860  | H | 4.2770035  | 3.8520022  | -1.2063102 |
| C | -0.5959907 | -1.7752476 | 6.4334658  | C | 2.5401727  | 1.8153720  | -1.5867010 |
| H | -1.3346455 | -1.9194835 | 4.4236836  | H | 0.9632228  | 2.4844815  | -3.6621978 |
| H | 0.0441417  | -1.1303017 | 7.0709961  | H | 1.0147978  | 4.6338788  | -4.9420368 |
| H | -0.1688562 | -2.7982769 | 6.4568445  | H | 2.6951421  | 6.3988272  | -4.3544477 |
| H | -1.6046796 | -1.8103885 | 6.8941741  | O | 3.2327564  | 1.6233904  | -0.5721495 |
| C | 4.1722068  | 0.3400540  | 4.8238181  | H | 1.8104910  | 1.0417676  | -1.9360602 |
| C | 3.8965314  | 1.8064097  | 4.4534080  | C | 1.9474733  | 3.7114030  | 1.4782123  |
| H | 4.7415193  | 2.4597961  | 4.7506852  | C | 1.3713942  | 3.6423608  | 2.7024155  |
| H | 2.9876299  | 2.1986265  | 4.9529546  | C | 2.1668801  | 4.5363286  | 3.6088141  |
| H | 3.7591315  | 1.9202589  | 3.3586068  | O | 3.2075593  | 5.0845117  | 2.8792850  |
| C | 4.4106078  | 0.1762505  | 6.3354276  | C | 3.1515524  | 4.5985559  | 1.5386479  |
| H | 5.1001203  | 0.0326026  | 4.2953498  | O | 2.0008256  | 4.7786706  | 4.7842057  |
| H | 5.2649201  | 0.8020900  | 6.6653424  | C | 0.2432348  | 2.8276166  | 3.2178922  |
| H | 4.6322960  | -0.8775742 | 6.5992258  | H | 4.0920913  | 4.0406982  | 1.3153548  |
| H | 3.5230279  | 0.4924973  | 6.9220303  | H | 3.1002034  | 5.4619678  | 0.8355811  |
| C | 2.7064523  | -3.6034831 | 1.9579676  | H | -0.2001233 | 3.3318896  | 4.1017393  |
| C | 3.6735589  | -3.2432618 | 0.8199898  | H | 0.6639804  | 1.8729831  | 3.6118491  |
| H | 3.9359362  | -4.1512861 | 0.2396073  | H | 1.6039813  | 3.1913136  | 0.5770996  |
| H | 4.6249062  | -2.8028359 | 1.1816518  |   |            |            |            |
| H | 3.1992314  | -2.5386679 | 0.1067629  |   |            |            |            |
| C | 3.2749780  | -4.7584813 | 2.8087779  |   |            |            |            |
| H | 1.7731969  | -3.9676885 | 1.4829849  |   |            |            |            |
| H | 3.4801630  | -5.6496730 | 2.1802556  |   |            |            |            |
| H | 2.5707483  | -5.0565960 | 3.6112157  |   |            |            |            |
| H | 4.2252997  | -4.4586884 | 3.2977774  |   |            |            |            |
| H | -0.4726187 | 3.4883047  | -6.5205246 |   |            |            |            |
| H | -1.1243785 | -2.3343341 | -6.1230839 |   |            |            |            |
| H | -4.2695126 | 3.9736979  | -1.6706555 |   |            |            |            |
| C | -0.4136690 | 2.3907586  | -6.6996904 |   |            |            |            |
| H | 0.6289469  | -3.3174814 | -3.7018570 |   |            |            |            |
| H | 1.3306903  | 2.6368311  | -8.0024744 |   |            |            |            |
| H | -1.9186713 | 4.2171300  | -0.6740543 |   |            |            |            |
| C | -0.8493719 | 1.7096451  | -5.4070557 |   |            |            |            |
| C | -1.6200216 | -2.5891157 | -5.1631459 |   |            |            |            |
| C | 1.0323271  | 2.0589906  | -7.1038120 |   |            |            |            |
| H | 1.1486966  | 0.9843099  | -7.3544732 |   |            |            |            |
| C | -0.6683253 | 0.3292171  | -5.2082100 |   |            |            |            |
| C | -3.8389169 | 3.4209011  | -2.5302659 |   |            |            |            |
| H | -2.4354626 | 2.3428117  | -7.5668215 |   |            |            |            |
| C | -1.4864383 | 2.4369700  | -4.3866350 |   |            |            |            |
| C | -1.3984693 | 2.0616115  | -7.8384417 |   |            |            |            |
| H | -1.1257021 | 2.5985397  | -8.7706471 |   |            |            |            |
| H | -1.6053715 | 3.5270910  | -4.5059853 |   |            |            |            |
| C | 0.5072447  | -2.2196917 | -3.8081662 |   |            |            |            |
| H | -1.5389806 | -3.6875974 | -5.0301540 |   |            |            |            |
| H | -2.6943233 | -2.3334757 | -5.2616456 |   |            |            |            |
| C | -1.1668866 | -0.3388396 | -4.0740637 |   |            |            |            |
| C | -1.5074226 | 3.6809205  | -1.5546611 |   |            |            |            |
| C | -1.9682736 | 1.8264405  | -3.2121796 |   |            |            |            |
| H | -4.6082192 | 2.7092607  | -2.8924189 |   |            |            |            |
| H | -3.6486547 | 4.1519020  | -3.3447032 |   |            |            |            |
| C | -0.9791135 | -1.8519088 | -3.9734091 |   |            |            |            |
| C | -1.8573670 | 0.4132886  | -3.0816895 |   |            |            |            |
| C | -2.5546068 | 2.6933350  | -2.1016414 |   |            |            |            |
| H | 0.9333392  | -1.7435282 | -2.9032097 |   |            |            |            |
| H | -0.5961677 | 3.1437004  | -1.2265218 |   |            |            |            |

### TS2; COSMO

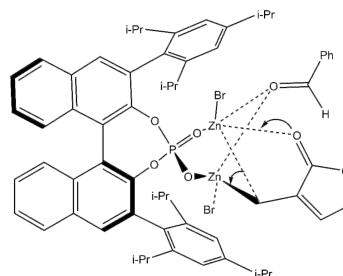

Energy (Hartree) = -11970.02803707

|    |            |            |            |
|----|------------|------------|------------|
| Zn | 2.4148590  | 0.1418338  | -1.8207402 |
| Br | 3.7542041  | -0.9365086 | -3.3914282 |
| Zn | 1.1376423  | 2.5540832  | -1.6472988 |
| Br | 0.7859429  | 4.4955383  | -2.8607763 |
| C  | 0.6373365  | -0.8273354 | 2.4558407  |
| C  | -0.5897239 | -1.1666052 | 3.0332243  |
| C  | -0.6575105 | -2.3673532 | 3.8328822  |
| C  | -1.8835091 | -2.9065012 | 4.3279447  |
| C  | 0.5645956  | -3.0775027 | 4.1246987  |
| C  | 0.5188429  | -4.2380428 | 4.9550979  |
| C  | 1.7833055  | -2.6521103 | 3.5247631  |
| H  | 2.7000256  | -3.2285857 | 3.7209064  |
| C  | 1.8349561  | -1.5824815 | 2.6376759  |
| C  | -3.3706356 | 0.6835404  | 1.1369436  |
| C  | -4.2089251 | 1.0399014  | 2.1887073  |
| H  | -5.1689650 | 1.5275507  | 1.9624389  |
| C  | -3.8454506 | 0.8404359  | 3.5491882  |
| C  | -4.6733320 | 1.3099795  | 4.6134300  |
| C  | -2.5992783 | 0.1846413  | 3.8587908  |
| C  | -2.2068431 | 0.0929419  | 5.2286109  |
| C  | -1.7899325 | -0.3245315 | 2.7777086  |



|   |            |            |            |   |            |            |            |
|---|------------|------------|------------|---|------------|------------|------------|
| C | -2.1651344 | -0.0073095 | 1.4651160  | C | -7.0259076 | 1.9388551  | -3.9575633 |
| O | 0.7130854  | 0.3302677  | 1.6810325  | H | -7.5697465 | 2.3195843  | -4.8469502 |
| O | -1.3650623 | -0.4343060 | 0.3999296  | H | -4.2837443 | 3.7745444  | -2.2564789 |
| P | 0.0779571  | 0.3075729  | 0.1665344  | C | -3.3186505 | -2.3070194 | -1.6407015 |
| O | 0.8826276  | -0.6147722 | -0.7701908 | H | -5.6837198 | -3.0592853 | -0.3645378 |
| O | -0.0825281 | 1.7785437  | -0.2494760 | H | -6.3290653 | -1.4117031 | -0.0597411 |
| C | -0.6861724 | -4.7132801 | 5.4497978  | C | -4.2189093 | 0.0192971  | -1.1584137 |
| C | -1.8971311 | -4.0496372 | 5.1156929  | C | -2.2236237 | 4.4309618  | -0.5168047 |
| H | 1.4620426  | -4.7610620 | 5.1782130  | C | -3.7357934 | 2.3896335  | -0.6807824 |
| H | -0.7093831 | -5.6130362 | 6.0832910  | H | -5.0451368 | 3.6901087  | 1.4311494  |
| H | -2.8302196 | -2.4112422 | 4.0726817  | H | -4.9545698 | 4.8233024  | 0.0496043  |
| H | -2.8567314 | -4.4475481 | 5.4796424  | C | -4.2424014 | -1.4541643 | -0.7544584 |
| C | -3.0236308 | 0.5788783  | 6.2402214  | C | -3.7503005 | 1.0270744  | -0.2711515 |
| C | -4.2757389 | 1.1776532  | 5.9351166  | C | -3.2052307 | 3.5062691  | 0.2183767  |
| H | -1.2374693 | -0.3593078 | 5.4798468  | H | -2.2813365 | -1.9184915 | -1.6272193 |
| H | -2.6943898 | 0.5048098  | 7.2878990  | H | -1.4088562 | 3.8600861  | -0.9971688 |
| H | -4.9179787 | 1.5511046  | 6.7471992  | H | -3.6654687 | -2.3210073 | -2.6942318 |
| H | -5.6277583 | 1.7980280  | 4.3607394  | H | -3.8866235 | 1.7650119  | -5.5170774 |
| C | 3.3756215  | -2.2185950 | 0.7610464  | H | -2.7222156 | 5.0308505  | -1.3061108 |
| C | 3.0556725  | -1.3114406 | 1.8146405  | H | -7.2488123 | 0.8552679  | -3.8625502 |
| C | 4.5479144  | -1.9912436 | 0.0164945  | H | -3.8543142 | -1.5220647 | 0.2819310  |
| C | 3.8895926  | -0.1900106 | 2.0722159  | H | -2.6424573 | 3.0256641  | 1.0444375  |
| C | 5.0470927  | -0.0053964 | 1.2874054  | H | -5.1263346 | -0.3793601 | -3.0824938 |
| C | 5.4080941  | -0.9079195 | 0.2683727  | C | -0.3092912 | -2.8969984 | -4.6563356 |
| H | 4.8131873  | -2.6906933 | -0.7909111 | C | 0.0828736  | -1.6692317 | -4.1208206 |
| C | 3.5957589  | 0.7801618  | 3.2156504  | C | -0.8184937 | -0.5742182 | -4.1487323 |
| H | 5.6917276  | 0.8640874  | 1.4912696  | C | -2.1038673 | -0.7284430 | -4.7214372 |
| C | 3.2934468  | 2.2055187  | 2.7175321  | C | -2.4833642 | -1.9570099 | -5.2702459 |
| H | 4.1291104  | 2.6259956  | 2.1205865  | C | -1.5881097 | -3.0411391 | -5.2324591 |
| H | 3.1144642  | 2.8837203  | 3.5773275  | H | 0.3848675  | -3.7501929 | -4.6308248 |
| H | 2.3798788  | 2.2140830  | 2.0909395  | H | 1.0867588  | -1.5425096 | -3.6891900 |
| C | 4.7388055  | 0.7765657  | 4.2483615  | C | -0.4684769 | 0.7129042  | -3.5789794 |
| H | 2.6879548  | 0.4112792  | 3.7372208  | H | -2.8004854 | 0.1207115  | -4.7197563 |
| H | 5.6796665  | 1.1739010  | 3.8141104  | H | -3.4810727 | -2.0772651 | -5.7183065 |
| H | 4.9444340  | -0.2482006 | 4.6193759  | H | -1.8888958 | -4.0121809 | -5.6553379 |
| H | 4.4792605  | 1.4135241  | 5.1189781  | O | 0.6435377  | 0.9807503  | -3.0757062 |
| C | 6.7183771  | -0.7823316 | -0.4993930 | H | -1.2533017 | 1.5100244  | -3.5896196 |
| C | 6.8953872  | 0.5824845  | -1.1798058 | C | 4.2832419  | 2.9221123  | -3.0732174 |
| H | 7.8393427  | 0.6077357  | -1.7621468 | C | 4.1219798  | 2.7427351  | -1.7423412 |
| H | 6.9396568  | 1.4062282  | -0.4392653 | C | 5.2270166  | 3.4718107  | -1.0544136 |
| H | 6.0587475  | 0.7838022  | -1.8778904 | O | 6.0207037  | 4.0589469  | -2.0110769 |
| C | 7.9104224  | -1.1073049 | 0.4213689  | C | 5.4953108  | 3.7621438  | -3.3105793 |
| H | 6.6881431  | -1.5521672 | -1.3009118 | O | 5.4633270  | 3.5687241  | 0.1356429  |
| H | 8.8640390  | -1.0877163 | -0.1460161 | C | 3.0984991  | 1.9818426  | -0.9711757 |
| H | 7.8036631  | -2.1094829 | 0.8838534  | H | 6.2738603  | 3.2324258  | -3.9046756 |
| H | 7.9907921  | -0.3639119 | 1.2422224  | H | 5.2605598  | 4.7147550  | -3.8362225 |
| C | 2.5351423  | -3.4615440 | 0.4552720  | H | 2.7642382  | 2.5987097  | -0.1019845 |
| C | 2.1903148  | -3.6246452 | -1.0350093 | H | 3.6300913  | 1.2000638  | -0.3600465 |
| H | 1.5708409  | -4.5337711 | -1.1806701 | H | 3.6497484  | 2.5247688  | -3.8784453 |
| H | 3.0930688  | -3.7311416 | -1.6701196 |   |            |            |            |
| H | 1.6133702  | -2.7566038 | -1.4036991 |   |            |            |            |
| C | 3.2385339  | -4.7257153 | 0.9886558  |   |            |            |            |
| H | 1.5729859  | -3.3586982 | 0.9959140  |   |            |            |            |
| H | 2.6078549  | -5.6244630 | 0.8270459  |   |            |            |            |
| H | 3.4565569  | -4.6514323 | 2.0727365  |   |            |            |            |
| H | 4.2042968  | -4.8901119 | 0.4662275  |   |            |            |            |
| H | -5.3546374 | 3.2777381  | -4.1890608 |   |            |            |            |
| H | -6.1366510 | -2.0056511 | -1.7386620 |   |            |            |            |
| H | -3.9559479 | 5.1113011  | 1.5103637  |   |            |            |            |
| C | -5.5097929 | 2.1808852  | -4.0923438 |   |            |            |            |
| H | -3.2956640 | -3.3570722 | -1.2824795 |   |            |            |            |
| H | -5.5051738 | 1.8973690  | -6.2633561 |   |            |            |            |
| H | -1.7612550 | 5.1466817  | 0.1934360  |   |            |            |            |
| C | -4.7919904 | 1.7506228  | -2.8161039 |   |            |            |            |
| C | -5.6774952 | -2.0107976 | -0.7279099 |   |            |            |            |
| C | -4.9600627 | 1.5290680  | -5.3702956 |   |            |            |            |
| H | -5.0771549 | 0.4247934  | -5.3501340 |   |            |            |            |
| C | -4.7272309 | 0.4020383  | -2.4150877 |   |            |            |            |
| C | -4.3551208 | 4.3230380  | 0.8391154  |   |            |            |            |
| H | -7.4345747 | 2.4446512  | -3.0598141 |   |            |            |            |
| C | -4.2606614 | 2.7174525  | -1.9456982 |   |            |            |            |

### TS2

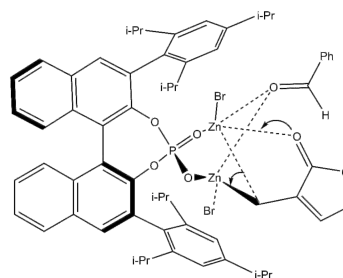

Energy (Hartree) = -11970.01404649  
number of imaginary frequencies: 1

|    |            |            |            |
|----|------------|------------|------------|
| Zn | 2.3968939  | 0.1176029  | -1.8306026 |
| Br | 3.7294057  | -0.9632889 | -3.4000417 |
| Zn | 1.1058387  | 2.5226701  | -1.6743457 |
| Br | 0.7432596  | 4.4651008  | -2.8692198 |
| C  | 0.6324782  | -0.8342460 | 2.4571648  |
| C  | -0.5917539 | -1.1760074 | 3.0398130  |

|   |            |            |            |   |            |            |            |
|---|------------|------------|------------|---|------------|------------|------------|
| C | -0.6522330 | -2.3730507 | 3.8453793  | H | -5.2742996 | 3.3254932  | -4.1812513 |
| C | -1.8743015 | -2.9142317 | 4.3471769  | H | -6.1466207 | -1.9655012 | -1.7711839 |
| C | 0.5733520  | -3.0767908 | 4.1372508  | H | -3.9646992 | 5.1019880  | 1.5495624  |
| C | 0.5338051  | -4.2327045 | 4.9735845  | C | -5.4437409 | 2.2298565  | -4.0942879 |
| C | 1.7883092  | -2.6487259 | 3.5322101  | H | -3.3247982 | -3.3512447 | -1.2874873 |
| H | 2.7086344  | -3.2195553 | 3.7279924  | H | -5.4110092 | 1.9621155  | -6.2681963 |
| C | 1.8338951  | -1.5833835 | 2.6400330  | H | -1.7488770 | 5.1441841  | 0.2716090  |
| C | -3.3751446 | 0.6748919  | 1.1474202  | C | -4.7480802 | 1.7828286  | -2.8115677 |
| C | -4.2117434 | 1.0319764  | 2.1998189  | C | -5.6983347 | -1.9802506 | -0.7556674 |
| H | -5.1689998 | 1.5250175  | 1.9735375  | C | -4.8836416 | 1.5818575  | -5.3695182 |
| C | -3.8482582 | 0.8300062  | 3.5596341  | H | -5.0146398 | 0.4789861  | -5.3595431 |
| C | -4.6737347 | 1.3000603  | 4.6248960  | C | -4.7023343 | 0.4312533  | -2.4188409 |
| C | -2.6023895 | 0.1730834  | 3.8675557  | C | -4.3538860 | 4.3197954  | 0.8657371  |
| C | -2.2086440 | 0.0817240  | 5.2367759  | H | -7.3787718 | 2.5082869  | -3.0869599 |
| C | -1.7949413 | -0.3376984 | 2.7857909  | C | -4.2201678 | 2.7385086  | -1.9274790 |
| C | -2.1724780 | -0.0220379 | 1.4735498  | C | -6.9641977 | 2.0051255  | -3.9831189 |
| O | 0.7028386  | 0.3187489  | 1.6769434  | H | -7.4921595 | 2.3984925  | -4.8765427 |
| O | -1.3775725 | -0.4535655 | 0.4073772  | H | -4.2284802 | 3.7978143  | -2.2309599 |
| P | 0.0644752  | 0.2899182  | 0.1644552  | C | -3.3322557 | -2.2996399 | -1.6414367 |
| O | 0.8659348  | -0.6362897 | -0.7716975 | H | -5.7214075 | -3.0302069 | -0.3974464 |
| O | -0.1027831 | 1.7568647  | -0.2594323 | H | -6.3508255 | -1.3766109 | -0.0928884 |
| C | -0.6672217 | -4.7098176 | 5.4746734  | C | -4.2128809 | 0.0353754  | -1.1589298 |
| C | -1.8811393 | -4.0526527 | 5.1410535  | C | -2.2003304 | 4.4360647  | -0.4527111 |
| H | 1.4796869  | -4.7510253 | 5.1962727  | C | -3.7154837 | 2.3982372  | -0.6579858 |
| H | -0.6847901 | -5.6061822 | 6.1130449  | H | -5.0553461 | 3.6843200  | 1.4413225  |
| H | -2.8230005 | -2.4228619 | 4.0921190  | H | -4.9395041 | 4.8276418  | 0.0708694  |
| H | -2.8381059 | -4.4517506 | 5.5104553  | C | -4.2569500 | -1.4398546 | -0.7631944 |
| C | -3.0236266 | 0.5681619  | 6.2489922  | C | -3.7452949 | 1.0324699  | -0.2595801 |
| C | -4.2751382 | 1.1676635  | 5.9456830  | C | -3.1949243 | 3.5061732  | 0.2577056  |
| H | -1.2392333 | -0.3712357 | 5.4858907  | H | -2.2908714 | -1.9234670 | -1.6133307 |
| H | -2.6929029 | 0.4939469  | 7.2961267  | H | -1.3780974 | 3.8702216  | -0.9251952 |
| H | -4.9160775 | 1.5420197  | 6.7582998  | H | -3.6663280 | -2.3666701 | -2.6992344 |
| H | -5.6276507 | 1.7895595  | 4.3731202  | H | -3.8052161 | 1.8048487  | -5.4989433 |
| C | 3.3735332  | -2.2180862 | 0.7624998  | H | -2.6833886 | 5.0453539  | -1.2443497 |
| C | 3.0513955  | -1.3090900 | 1.8135483  | H | -7.2015186 | 0.9238763  | -3.8982179 |
| C | 4.5409952  | -1.9851960 | 0.0125867  | H | -3.8818145 | -1.5162540 | 0.2773793  |
| C | 3.8782151  | -0.1808170 | 2.0637788  | H | -2.6465887 | 3.0179234  | 1.0887666  |
| C | 5.0309507  | 0.0091077  | 1.2734770  | H | -5.1031317 | -0.3419121 | -3.0949647 |
| C | 5.3945169  | -0.8951460 | 0.2570452  | C | -0.2826852 | -2.9475230 | -4.6778676 |
| H | 4.8074893  | -2.6847407 | -0.7942885 | C | 0.0904036  | -1.7138422 | -4.1418255 |
| C | 3.5822883  | 0.7912503  | 3.2051145  | C | -0.8286586 | -0.6343090 | -4.1683205 |
| H | 5.6684086  | 0.8856093  | 1.4696897  | C | -2.1111735 | -0.8082596 | -4.7405694 |
| C | 3.2669369  | 2.2130979  | 2.7049357  | C | -2.4707438 | -2.0426032 | -5.2899439 |
| H | 4.0959834  | 2.6402870  | 2.1036627  | C | -1.5585927 | -3.1122305 | -5.2530536 |
| H | 3.0867311  | 2.8917028  | 3.5640521  | H | 0.4268268  | -3.7879633 | -4.6520345 |
| H | 2.3489634  | 2.2129796  | 2.0848372  | H | 1.0938722  | -1.5711783 | -3.7131164 |
| C | 4.7305734  | 0.7988587  | 4.2319043  | C | -0.4953531 | 0.6583811  | -3.5956037 |
| H | 2.6800799  | 0.4164746  | 3.7323891  | H | -2.8216565 | 0.0293507  | -4.7367860 |
| H | 5.6660031  | 1.2021040  | 3.7919051  | H | -3.4667722 | -2.1779976 | -5.7375235 |
| H | 4.9462167  | -0.2230525 | 4.6047556  | H | -1.8442749 | -4.0878324 | -5.6762347 |
| H | 4.4714816  | 1.4366500  | 5.1019755  | O | 0.6115721  | 0.9359590  | -3.0915726 |
| C | 6.7016900  | -0.7649802 | -0.5152018 | H | -1.2899588 | 1.4467512  | -3.6038655 |
| C | 6.8696639  | 0.5974715  | -1.2023275 | C | 4.2463675  | 2.9190102  | -3.0803519 |
| H | 7.8118365  | 0.6244243  | -1.7874257 | C | 4.0844049  | 2.7343156  | -1.7513294 |
| H | 6.9120418  | 1.4259415  | -0.4671004 | C | 5.1828101  | 3.4702962  | -1.0556046 |
| H | 6.0307203  | 0.7899218  | -1.8999853 | O | 5.9720524  | 4.0701712  | -2.0108842 |
| C | 7.8974163  | -1.0798925 | 0.4041298  | C | 5.4519793  | 3.7734726  | -3.3089244 |
| H | 6.6730812  | -1.5381997 | -1.3135892 | O | 5.4149033  | 3.5567183  | 0.1336330  |
| H | 8.8499847  | -1.0575295 | -0.1648239 | C | 3.0662001  | 1.9640900  | -0.9835688 |
| H | 7.7969808  | -2.0802608 | 0.8715948  | H | 6.2368276  | 3.2537420  | -3.9047535 |
| H | 7.9757721  | -0.3330576 | 1.2218270  | H | 5.2069608  | 4.7255713  | -3.8321036 |
| C | 2.5409477  | -3.4685286 | 0.4652575  | H | 2.7289892  | 2.5770195  | -0.1117968 |
| C | 2.1899278  | -3.6400910 | -1.0225957 | H | 3.6039006  | 1.1856337  | -0.3733804 |
| H | 1.5765380  | -4.5544240 | -1.1616526 | H | 3.6172773  | 2.5176162  | -3.8869831 |
| H | 3.0896265  | -3.7413786 | -1.6627721 |   |            |            |            |
| H | 1.6045030  | -2.7776528 | -1.3909993 |   |            |            |            |
| C | 3.2565247  | -4.7250396 | 1.0001102  |   |            |            |            |
| H | 1.5806061  | -3.3713854 | 1.0101775  |   |            |            |            |
| H | 2.6327278  | -5.6297925 | 0.8456483  |   |            |            |            |
| H | 3.4796497  | -4.6446660 | 2.0826270  |   |            |            |            |
| H | 4.2213059  | -4.8840625 | 0.4745346  |   |            |            |            |

int1; COSMO



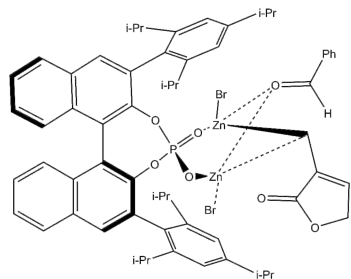

Energy (Hartree) = -11970.02936483

|    |            |            |            |
|----|------------|------------|------------|
| Zn | 0.5229804  | -0.1422220 | 3.1322804  |
| Br | 2.1298411  | -0.3461748 | 4.8134877  |
| Zn | -1.7905994 | 1.2606365  | 2.6719903  |
| Br | -3.4338456 | 2.6207985  | 3.5631172  |
| C  | -0.5207569 | -2.3142680 | -0.9236962 |
| C  | -0.5320453 | -2.0616179 | -2.2968688 |
| C  | 0.0916880  | -3.0242194 | -3.1734692 |
| C  | 0.2824333  | -2.7983440 | -4.5704098 |
| C  | 0.5720933  | -4.2641130 | -2.6119120 |
| C  | 1.1498145  | -5.2447092 | -3.4738052 |
| C  | 0.5160950  | -4.4655796 | -1.2035780 |
| H  | 0.9087743  | -5.4052052 | -0.7865327 |
| C  | 0.0364265  | -3.4896436 | -0.3374539 |
| C  | -1.0374636 | 1.6824905  | -2.9436275 |
| C  | -1.9244425 | 1.6443214  | -4.0151541 |
| H  | -2.1786398 | 2.5836379  | -4.5292775 |
| C  | -2.5241670 | 0.4338518  | -4.4610981 |
| C  | -3.5058549 | 0.4279291  | -5.4973930 |
| C  | -2.1331146 | -0.8124112 | -3.8510912 |
| C  | -2.7863426 | -2.0088738 | -4.2753609 |
| C  | -1.1252783 | -0.8005960 | -2.8193384 |
| C  | -0.6873293 | 0.4393882  | -2.3354865 |
| O  | -1.1273001 | -1.3888230 | -0.0753354 |
| O  | 0.1983949  | 0.4796891  | -1.2503391 |
| P  | -0.3907110 | 0.0484527  | 0.2193815  |
| O  | 0.8298331  | -0.1226439 | 1.1437249  |
| O  | -1.5055826 | 0.9966947  | 0.6961784  |
| C  | 1.2893222  | -5.0060071 | -4.8326043 |
| C  | 0.8666576  | -3.7642986 | -5.3785110 |
| H  | 1.5002253  | -6.1906524 | -3.0318446 |
| H  | 1.7422776  | -5.7674290 | -5.4856467 |
| H  | -0.0316970 | -1.8410033 | -5.0083371 |
| H  | 1.0073902  | -3.5629644 | -6.4514839 |
| C  | -3.7516724 | -1.9794878 | -5.2722694 |
| C  | -4.1070842 | -0.7550129 | -5.8999558 |
| H  | -2.5277675 | -2.9612542 | -3.7916903 |
| H  | -4.2503963 | -2.9129507 | -5.5745822 |
| H  | -4.8689087 | -0.7468748 | -6.6942615 |
| H  | -3.7868070 | 1.3863898  | -5.9614303 |
| C  | 1.4434217  | -3.3794563 | 1.7430477  |
| C  | 0.1707988  | -3.6212955 | 1.1479035  |
| C  | 1.5721748  | -3.5475381 | 3.1344477  |
| C  | -0.9397918 | -3.9958901 | 1.9501654  |
| C  | -0.7567266 | -4.1385137 | 3.3411085  |
| C  | 0.4962331  | -3.9390952 | 3.9515922  |
| H  | 2.5507399  | -3.3754497 | 3.6072777  |
| C  | -2.3075044 | -4.2853765 | 1.3332301  |
| H  | -1.6206258 | -4.4224992 | 3.9623311  |
| C  | -3.3597467 | -3.2293664 | 1.7208069  |
| H  | -3.4956746 | -3.1648628 | 2.8201236  |
| H  | -4.3417477 | -3.4794439 | 1.2685777  |
| H  | -3.0652553 | -2.2285355 | 1.3477794  |
| C  | -2.7884921 | -5.7072005 | 1.6767061  |
| H  | -2.1854029 | -4.2430106 | 0.2304719  |
| H  | -2.9855226 | -5.8202108 | 2.7629627  |
| H  | -2.0365106 | -6.4696268 | 1.3879713  |

|   |            |            |            |
|---|------------|------------|------------|
| H | -3.7343644 | -5.9361053 | 1.1439016  |
| C | 0.7185311  | -4.1978253 | 5.4369113  |
| C | -0.2152639 | -3.3757818 | 6.3377492  |
| H | 0.0101770  | -3.5640950 | 7.4076176  |
| H | -1.2796377 | -3.6383079 | 6.1708972  |
| H | -0.0887507 | -2.2916404 | 6.1477802  |
| C | 0.6093974  | -5.7037108 | 5.7434149  |
| H | 1.7601562  | -3.8797555 | 5.6598589  |
| H | 0.8387824  | -5.9067291 | 6.8100795  |
| H | 1.3099990  | -6.2957911 | 5.1203108  |
| H | -0.4172938 | -6.0757703 | 5.5427647  |
| C | 2.6785744  | -3.0303572 | 0.9084027  |
| C | 3.5526645  | -1.9193634 | 1.5131258  |
| H | 4.3928055  | -1.6878320 | 0.8263171  |
| H | 3.9944214  | -2.2127907 | 2.4872874  |
| H | 2.9745489  | -0.9899646 | 1.6653021  |
| C | 3.5251011  | -4.2953063 | 0.6583812  |
| H | 2.3216694  | -2.6612354 | -0.0751819 |
| H | 4.3947914  | -4.0643703 | 0.0088075  |
| H | 2.9387578  | -5.0982929 | 0.1702267  |
| H | 3.9127796  | -4.7008770 | 1.6164108  |
| H | 0.3887852  | 7.5763107  | -1.3518696 |
| H | 2.9073128  | 3.6668038  | -4.9991212 |
| H | -4.6918924 | 4.0015140  | -1.8619588 |
| C | 1.0884207  | 7.0537018  | -2.0406608 |
| H | 3.5249890  | 1.0459618  | -3.3234653 |
| H | 2.7850924  | 8.2672076  | -1.3783333 |
| H | -3.7893702 | 3.7375724  | 0.5138640  |
| C | 0.6091526  | 5.6088821  | -2.1400344 |
| C | 2.2354111  | 2.7875954  | -5.0874773 |
| C | 2.5034071  | 7.1973404  | -1.4578026 |
| H | 3.2633721  | 6.7080707  | -2.1027627 |
| C | 1.3725192  | 4.6179163  | -2.7860255 |
| C | -3.6772513 | 4.2580393  | -2.2301426 |
| H | -0.0459522 | 7.6801911  | -3.8196428 |
| C | -0.6567505 | 5.2433862  | -1.6492223 |
| C | 0.9846016  | 7.7421711  | -3.4159697 |
| H | 1.2655812  | 8.8135375  | -3.3462982 |
| H | -1.2585017 | 6.0046002  | -1.1265015 |
| C | 2.9431137  | 1.8499804  | -2.8267857 |
| H | 2.8012603  | 1.9922472  | -5.6148531 |
| H | 1.3783079  | 3.0810981  | -5.7270828 |
| C | 0.8851445  | 3.3135693  | -2.9927095 |
| C | -2.8056401 | 4.0793858  | 0.1361788  |
| C | -1.1947901 | 3.9537692  | -1.8343864 |
| H | -3.5931895 | 3.8978212  | -3.2744713 |
| H | -3.5922645 | 5.3649824  | -2.2489222 |
| C | 1.7614606  | 2.2886983  | -3.7114990 |
| C | -0.4250627 | 2.9907992  | -2.5407384 |
| C | -2.5983850 | 3.6396952  | -1.3200493 |
| H | 2.5899153  | 1.4678372  | -1.8488147 |
| H | -2.0430326 | 3.6345674  | 0.8031453  |
| H | 3.6349539  | 2.6960044  | -2.6330387 |
| H | 2.5770020  | 6.7543450  | -0.4444650 |
| H | -2.7697226 | 5.1821131  | 0.2553555  |
| H | 1.6627739  | 7.2599969  | -4.1512135 |
| H | 1.1403270  | 1.3885394  | -3.8947865 |
| H | -2.7190532 | 2.5370388  | -1.3446597 |
| H | 2.3746447  | 4.8727298  | -3.1660882 |
| C | 4.3654155  | 2.2542888  | 1.7026390  |
| C | 3.0572880  | 2.1949342  | 2.1829130  |
| C | 2.0577315  | 3.0145670  | 1.5970982  |
| C | 2.3896887  | 3.8910544  | 0.5341678  |
| C | 3.7041464  | 3.9435974  | 0.0607292  |
| C | 4.6891426  | 3.1266991  | 0.6430554  |
| H | 5.1419082  | 1.6174122  | 2.1519184  |
| H | 2.8002086  | 1.5211740  | 3.0150454  |
| C | 0.6738630  | 2.9547847  | 2.0148911  |
| H | 1.6031386  | 4.5028304  | 0.0653160  |
| H | 3.9601815  | 4.6155683  | -0.7704003 |
| H | 5.7227957  | 3.1662170  | 0.2658737  |

|   |            |            |           |
|---|------------|------------|-----------|
| O | 0.2059075  | 2.1371786  | 2.8441207 |
| H | -0.0251602 | 3.6812002  | 1.5328170 |
| C | -1.4693948 | 0.3605506  | 6.0012625 |
| C | -1.8806324 | -0.5086025 | 5.0500459 |
| C | -2.8815353 | -1.4193702 | 5.6784799 |
| O | -3.0272400 | -1.0595378 | 6.9970248 |
| C | -2.1747504 | 0.0559585  | 7.2817545 |
| O | -3.4948129 | -2.3484641 | 5.1870180 |
| C | -1.4880112 | -0.6549256 | 3.6196500 |
| H | -1.4756652 | -0.2211781 | 8.1027690 |
| H | -2.7957164 | 0.9075389  | 7.6398913 |
| H | -2.3997052 | -0.8760040 | 3.0131613 |
| H | -1.0028329 | -1.6604064 | 3.4838217 |
| H | -0.7333342 | 1.1690201  | 5.8897775 |

## int1

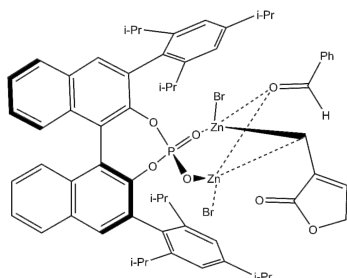

Energy (Hartree) = -11970.01606039

|    |            |            |            |
|----|------------|------------|------------|
| Zn | 0.4965767  | -0.1487641 | 3.1371432  |
| Br | 2.0933968  | -0.3200791 | 4.8256490  |
| Zn | -1.8145997 | 1.2737776  | 2.6617851  |
| Br | -3.4336339 | 2.6448100  | 3.5579957  |
| C  | -0.5259558 | -2.3046642 | -0.9170936 |
| O  | -0.5419937 | -2.0566494 | -2.2913951 |
| C  | 0.0747957  | -3.0237935 | -3.1678427 |
| C  | 0.2594365  | -2.8033842 | -4.5662944 |
| C  | 0.5535671  | -4.2634778 | -2.6050168 |
| C  | 1.1231634  | -5.2481138 | -3.4668959 |
| C  | 0.5033126  | -4.4595464 | -1.1960398 |
| H  | 0.8938266  | -5.3988658 | -0.7762250 |
| C  | 0.0311511  | -3.4800395 | -0.3302218 |
| C  | -1.0373039 | 1.6868887  | -2.9455458 |
| C  | -1.9252049 | 1.6491671  | -4.0159121 |
| H  | -2.1753437 | 2.5887687  | -4.5314878 |
| C  | -2.5299634 | 0.4401144  | -4.4580883 |
| C  | -3.5129246 | 0.4340515  | -5.4925097 |
| C  | -2.1425919 | -0.8055016 | -3.8448883 |
| C  | -2.8009551 | -2.0004750 | -4.2644900 |
| C  | -1.1324011 | -0.7950886 | -2.8155723 |
| C  | -0.6887454 | 0.4442384  | -2.3352766 |
| O  | -1.1272161 | -1.3767245 | -0.0694231 |
| O  | 0.2000443  | 0.4843065  | -1.2539004 |
| P  | -0.3919671 | 0.0625614  | 0.2197563  |
| O  | 0.8268063  | -0.1044445 | 1.1467859  |
| O  | -1.5035082 | 1.0180325  | 0.6859178  |
| C  | 1.2564135  | -5.0148566 | -4.8267196 |
| C  | 0.8353681  | -3.7739464 | -5.3740857 |
| H  | 1.4727606  | -6.1936693 | -3.0234834 |
| H  | 1.7031046  | -5.7801984 | -5.4793970 |
| H  | -0.0542411 | -1.8463238 | -5.0049223 |
| H  | 0.9706469  | -3.5766002 | -6.4484590 |
| C  | -3.7670506 | -1.9706264 | -5.2599963 |
| C  | -4.1188716 | -0.7473373 | -5.8906940 |
| H  | -2.5439756 | -2.9515237 | -3.7776438 |
| H  | -4.2694783 | -2.9032224 | -5.5585955 |
| H  | -4.8820659 | -0.7385370 | -6.6835954 |

|   |            |            |            |
|---|------------|------------|------------|
| H | -3.7917569 | 1.3922592  | -5.9583461 |
| C | 1.4423207  | -3.3439427 | 1.7451905  |
| C | 0.1721115  | -3.6083579 | 1.1548299  |
| C | 1.5771697  | -3.5061367 | 3.1363175  |
| C | -0.9294804 | -4.0014937 | 1.9602374  |
| C | -0.7409249 | -4.1356361 | 3.3514473  |
| C | 0.5100663  | -3.9131460 | 3.9574591  |
| H | 2.5533261  | -3.3158084 | 3.6067818  |
| C | -2.2925845 | -4.3158370 | 1.3449247  |
| H | -1.5993956 | -4.4277169 | 3.9760985  |
| C | -3.3551815 | -3.2599504 | 1.7041325  |
| H | -3.5002343 | -3.1775895 | 2.8010101  |
| H | -4.3318091 | -3.5260030 | 1.2494556  |
| H | -3.0655891 | -2.2646739 | 1.3129192  |
| C | -2.7652589 | -5.7326935 | 1.7181603  |
| H | -2.1645611 | -4.2972491 | 0.2419815  |
| H | -2.9739119 | -5.8206312 | 2.8043261  |
| H | -2.0047295 | -6.4963006 | 1.4565600  |
| H | -3.7039429 | -5.9823755 | 1.1821222  |
| C | 0.7445847  | -4.1666527 | 5.4417969  |
| C | -0.2056401 | -3.3722410 | 6.3496806  |
| H | 0.0340512  | -3.5546813 | 7.4174331  |
| H | -1.2637862 | -3.6632433 | 6.1924303  |
| H | -0.1093238 | -2.2849753 | 6.1602049  |
| C | 0.6775129  | -5.6757519 | 5.7445494  |
| H | 1.7782686  | -3.8206908 | 5.6603786  |
| H | 0.9164547  | -5.8761574 | 6.8095700  |
| H | 1.3904116  | -6.2474159 | 5.1165642  |
| H | -0.3394121 | -6.0747725 | 5.5467982  |
| C | 2.6693146  | -2.9804052 | 0.9044401  |
| C | 3.5473243  | -1.8757952 | 1.5149907  |
| H | 4.3754623  | -1.6280562 | 0.8192735  |
| H | 4.0065705  | -2.1837764 | 2.4764272  |
| H | 2.9682326  | -0.9520769 | 1.6940647  |
| C | 3.5175568  | -4.2394465 | 0.6319448  |
| H | 2.3028861  | -2.6000704 | -0.0715536 |
| H | 4.3834616  | -3.9979153 | -0.0187692 |
| H | 2.9313328  | -5.0370912 | 0.1355763  |
| H | 3.9105751  | -4.6576638 | 1.5821566  |
| H | 0.4374215  | 7.5611945  | -1.3199560 |
| H | 2.9024805  | 3.6660876  | -5.0267726 |
| H | -4.6742143 | 3.9987693  | -1.8477246 |
| C | 1.1232945  | 7.0425694  | -2.0256611 |
| H | 3.5060723  | 1.0261146  | -3.3730232 |
| H | 2.8375814  | 8.2351097  | -1.3670823 |
| H | -3.7691177 | 3.7559530  | 0.5304614  |
| C | 0.6327315  | 5.6023587  | -2.1358279 |
| C | 2.2214918  | 2.7940800  | -5.1168926 |
| C | 2.5470723  | 7.1687919  | -1.4603806 |
| H | 3.2950446  | 6.6863125  | -2.1242368 |
| C | 1.3832348  | 4.6134106  | -2.7989320 |
| C | -3.6605953 | 4.2489106  | -2.2225264 |
| H | -0.0317774 | 7.6994788  | -3.7793702 |
| C | -0.6304686 | 5.2398873  | -1.6362619 |
| C | 1.0046378  | 7.7496755  | -3.3900124 |
| H | 1.2944569  | 8.8180745  | -3.3122379 |
| H | -1.2231346 | 5.9998159  | -1.1015575 |
| C | 2.9340062  | 1.8316926  | -2.8678399 |
| H | 2.7767261  | 1.9985517  | -5.6549542 |
| H | 1.3636276  | 3.1014975  | -5.7485649 |
| C | 0.8872882  | 3.3132332  | -3.0098191 |
| C | -2.7909769 | 4.1037170  | 0.1446463  |
| C | -1.1781138 | 3.9550360  | -1.8260431 |
| H | -3.5804409 | 3.8723241  | -3.2611045 |
| H | -3.5754956 | 5.3553465  | -2.2592475 |
| C | 1.7515198  | 2.2879546  | -3.7424407 |
| C | -0.4191485 | 2.9933876  | -2.5458257 |
| C | -2.5800989 | 3.6447142  | -1.3047455 |
| H | 2.5830342  | 1.4451515  | -1.8909310 |
| H | -2.0250418 | 3.6776637  | 0.8198554  |
| H | 3.6353762  | 2.6695141  | -2.6719212 |

|   |            |            |            |   |            |            |            |
|---|------------|------------|------------|---|------------|------------|------------|
| H | 2.6334366  | 6.7074739  | -0.4563267 | O | 0.5712403  | 0.9355619  | 1.5483096  |
| H | -2.7691127 | 5.2083823  | 0.2489041  | O | 2.0031933  | 0.1166618  | -0.3822453 |
| H | 1.6673361  | 7.2715378  | -4.1415794 | P | 0.4423533  | 0.1262020  | 0.1222222  |
| H | 1.1219358  | 1.3945239  | -3.9294166 | O | -0.3030076 | 0.9897259  | -0.9058657 |
| H | -2.6977394 | 2.5415339  | -1.3139571 | O | -0.0781262 | -1.2732816 | 0.4418617  |
| H | 2.3823935  | 4.8659774  | -3.1883043 | C | 4.6448151  | 5.9343341  | 1.4275231  |
| C | 4.3669252  | 2.2605661  | 1.7736609  | C | 5.3813485  | 4.7453642  | 1.1774028  |
| C | 3.0516505  | 2.2134189  | 2.2364564  | H | 2.6895596  | 6.7807035  | 1.8159607  |
| C | 2.0595034  | 3.0058278  | 1.6042147  | H | 5.1568674  | 6.9086449  | 1.4246422  |
| C | 2.4037491  | 3.8428425  | 0.5148717  | H | 5.3328424  | 2.5982958  | 0.9855215  |
| C | 3.7253668  | 3.8836257  | 0.0600748  | H | 6.4599792  | 4.8047593  | 0.9660771  |
| C | 4.7040768  | 3.0935848  | 0.6876874  | C | 5.8336274  | 1.0392077  | 4.3406317  |
| H | 5.1366119  | 1.6415177  | 2.2582741  | C | 6.5862162  | -0.1501394 | 4.1469103  |
| H | 2.7823638  | 1.5662237  | 3.0864660  | H | 4.2140516  | 2.2830043  | 3.6539838  |
| C | 0.6670167  | 2.9494763  | 2.0019264  | H | 6.0738400  | 1.7073572  | 5.1817955  |
| H | 1.6225688  | 4.4314306  | 0.0085902  | H | 7.4164470  | -0.3924893 | 4.8277166  |
| H | 3.9893478  | 4.5256022  | -0.7921805 | H | 6.8054930  | -1.9569781 | 2.9729802  |
| H | 5.7432924  | 3.1228775  | 0.3247192  | C | -1.6927156 | 3.8661405  | 0.5235817  |
| O | 0.1932855  | 2.1543612  | 2.8451547  | C | -1.0068769 | 3.2902167  | 1.6355936  |
| H | -0.0283907 | 3.6556776  | 1.4835414  | C | -3.0946080 | 3.7742102  | 0.4776787  |
| C | -1.5479438 | 0.3498842  | 5.9690702  | C | -1.7479080 | 2.6577267  | 2.6703216  |
| C | -1.9201937 | -0.5346892 | 5.0174080  | C | -3.1532267 | 2.6198330  | 2.5837505  |
| C | -2.8833352 | -1.4906320 | 5.6427178  | C | -3.8513056 | 3.1653770  | 1.4951341  |
| O | -3.0481959 | -1.1346164 | 6.9621199  | C | -1.0773113 | 2.0583656  | 3.9055976  |
| C | -2.2470409 | 0.0140571  | 7.2468837  | H | -3.7121632 | 2.1355762  | 3.3975739  |
| O | -3.4476441 | -2.4462665 | 5.1491157  | C | -1.4092095 | 0.5657494  | 4.0836846  |
| C | -1.5192518 | -0.6595862 | 3.5874825  | H | -2.4934924 | 0.4060471  | 4.2615165  |
| H | -1.5387353 | -0.2315381 | 8.0709028  | H | -0.8661075 | 0.1495128  | 4.9571690  |
| H | -2.9042827 | 0.8406122  | 7.6006919  | H | -1.1141505 | -0.0159743 | 3.1891193  |
| H | -2.4288860 | -0.8618364 | 2.9705737  | C | -1.4267982 | 2.8702425  | 5.1673795  |
| H | -1.0449024 | -1.6682177 | 3.4378346  | H | 0.0199970  | 2.1361814  | 3.7688236  |
| H | -0.8455614 | 1.1876203  | 5.8571823  | H | -2.5146650 | 2.8315180  | 5.3860464  |
|   |            |            |            | H | -1.1459871 | 3.9366264  | 5.0493952  |
|   |            |            |            | H | -0.8917833 | 2.4691531  | 6.0531186  |
|   |            |            |            | C | -5.3750051 | 3.1555688  | 1.3929235  |
|   |            |            |            | C | -6.0646342 | 2.1704372  | 2.3441345  |
|   |            |            |            | H | -7.1535046 | 2.1315069  | 2.1370527  |
|   |            |            |            | H | -5.9455183 | 2.4776651  | 3.4041292  |
|   |            |            |            | H | -5.6584451 | 1.1449119  | 2.2387522  |
|   |            |            |            | C | -5.9379908 | 4.5786996  | 1.5855771  |
|   |            |            |            | H | -5.6180524 | 2.8466615  | 0.3496313  |
|   |            |            |            | H | -7.0386052 | 4.5939746  | 1.4435684  |
|   |            |            |            | H | -5.4901702 | 5.2963028  | 0.8695539  |
|   |            |            |            | H | -5.7189329 | 4.9457481  | 2.6102171  |
|   |            |            |            | C | -0.9796548 | 4.6247305  | -0.5988307 |
|   |            |            |            | C | -1.2451377 | 4.0450552  | -1.9979520 |
|   |            |            |            | H | -0.8140372 | 4.6993193  | -2.7827998 |
|   |            |            |            | H | -2.3253405 | 3.9257183  | -2.2178529 |
|   |            |            |            | H | -0.7487193 | 3.0614420  | -2.1067651 |
|   |            |            |            | C | -1.3390117 | 6.1228797  | -0.5402223 |
|   |            |            |            | H | 0.1113275  | 4.5428258  | -0.4283748 |
|   |            |            |            | H | -0.7610559 | 6.6950710  | -1.2950951 |
|   |            |            |            | H | -1.1218766 | 6.5538516  | 0.4587265  |
|   |            |            |            | H | -2.4175907 | 6.2885672  | -0.7446330 |
|   |            |            |            | H | 1.2756028  | -6.6594475 | -2.0549113 |
|   |            |            |            | H | 4.7626154  | -2.4299616 | -4.1344293 |
|   |            |            |            | H | 4.3628832  | -4.5788084 | 2.0691586  |
|   |            |            |            | C | 1.5460636  | -5.8611410 | -2.7801197 |
|   |            |            |            | H | 3.1324706  | 0.2953568  | -4.0078255 |
|   |            |            |            | H | -0.1392436 | -6.3542697 | -4.1044618 |
|   |            |            |            | H | 0.8223610  | -4.0130757 | 3.2970593  |
|   |            |            |            | C | 2.0620710  | -4.6830340 | -1.9633902 |
|   |            |            |            | C | 4.9858861  | -1.6814712 | -3.3453437 |
|   |            |            |            | C | 0.2652012  | -5.4853166 | -3.5440162 |
|   |            |            |            | H | 0.4740616  | -4.6783162 | -4.2795025 |
|   |            |            |            | C | 2.6005008  | -3.5392636 | -2.5802081 |
|   |            |            |            | C | 3.3080616  | -4.8000735 | 2.3295095  |
|   |            |            |            | H | 3.5350390  | -6.7164513 | -3.1662706 |
|   |            |            |            | C | 1.9971750  | -4.7021037 | -0.5620453 |
|   |            |            |            | C | 2.6198787  | -6.4303041 | -3.7230689 |
|   |            |            |            | H | 2.2429654  | -7.3297845 | -4.2527684 |

### 7.9.3 Pathway 14d-ma ↔ 14j-mi

TS1; COSMO

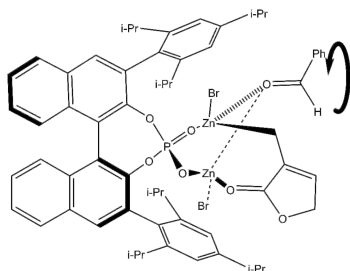

Energy (Hartree) = -11970.0377355

|   |           |            |           |
|---|-----------|------------|-----------|
| C | 1.2631781 | 2.1446050  | 1.5585037 |
| C | 2.6622217 | 2.1284844  | 1.4897337 |
| C | 3.3523925 | 3.3959249  | 1.4495937 |
| C | 4.7517224 | 3.5081528  | 1.1895633 |
| C | 2.5968132 | 4.6094735  | 1.6475584 |
| C | 3.2779860 | 5.8643385  | 1.6508834 |
| C | 1.1814056 | 4.5410436  | 1.7849770 |
| H | 0.6169468 | 5.4762010  | 1.9231094 |
| C | 0.4875856 | 3.3395175  | 1.6848892 |
| C | 3.6513001 | -1.4336392 | 0.4303937 |
| C | 4.7598158 | -1.6567506 | 1.2401981 |
| H | 5.2957761 | -2.6148411 | 1.1608258 |
| C | 5.1735280 | -0.7196054 | 2.2285620 |
| C | 6.2536624 | -1.0144104 | 3.1147547 |
| C | 4.4468320 | 0.5178783  | 2.3855009 |
| C | 4.7914543 | 1.3643836  | 3.4827945 |
| C | 3.3883947 | 0.8280475  | 1.4525116 |
| C | 3.0191837 | -0.1569609 | 0.5284740 |

|    |            |            |            |
|----|------------|------------|------------|
| H  | 1.5400302  | -5.5749444 | -0.0692141 |
| C  | 2.6889812  | -0.5953401 | -3.5168615 |
| H  | 5.7355254  | -2.1288333 | -2.6611289 |
| H  | 5.4508775  | -0.8027774 | -3.8386471 |
| C  | 3.1067239  | -2.4564063 | -1.8380589 |
| C  | 0.8947684  | -4.0283452 | 2.1895289  |
| C  | 2.4816535  | -3.6454910 | 0.2301712  |
| H  | 3.2300313  | -4.8393921 | 3.4360058  |
| H  | 3.0740894  | -5.8126294 | 1.9385344  |
| C  | 3.7117756  | -1.2689470 | -2.5844094 |
| C  | 3.0743992  | -2.5230296 | -0.4181157 |
| C  | 2.3428870  | -3.7483990 | 1.7505216  |
| H  | 1.7922680  | -0.2574897 | -2.9624109 |
| H  | 0.2074820  | -3.2652320 | 1.7799749  |
| H  | 2.3510748  | -1.2807529 | -4.3219743 |
| H  | -0.5173657 | -5.1280809 | -2.8440978 |
| H  | 0.5366918  | -5.0201124 | 1.8452583  |
| H  | 2.9147055  | -5.6896193 | -4.4956892 |
| H  | 4.0171703  | -0.5152065 | -1.8309511 |
| H  | 2.6219026  | -2.7661296 | 2.1814916  |
| H  | 2.6465327  | -3.4914563 | -3.6803776 |
| Zn | -1.5707753 | 0.7629559  | -2.3537762 |
| Br | -1.0143265 | 0.9843600  | -4.5980644 |
| Zn | -1.9826808 | -1.8966197 | 0.1092817  |
| Br | -2.1148199 | -4.1992627 | -0.4060063 |
| H  | -3.6238809 | 4.1975565  | -0.3918440 |
| C  | -5.3661164 | -2.8787333 | -4.4272107 |
| C  | -4.3491920 | -2.3364263 | -3.6415721 |
| C  | -3.0146814 | -2.7866030 | -3.8030290 |
| C  | -2.7166230 | -3.7810909 | -4.7655821 |
| C  | -3.7400991 | -4.3196613 | -5.5528429 |
| C  | -5.0620651 | -3.8713617 | -5.3818154 |
| H  | -6.4038189 | -2.5333051 | -4.3059003 |
| C  | -1.9446226 | -2.2160894 | -3.0044788 |
| H  | -1.6783281 | -4.1205205 | -4.8911046 |
| H  | -3.5112915 | -5.0908621 | -6.3030932 |
| H  | -5.8672824 | -4.2976438 | -5.9998473 |
| O  | -2.1290629 | -1.2698195 | -2.1967660 |
| H  | -4.5585364 | -1.5623461 | -2.8908574 |
| H  | -0.9157759 | -2.6261306 | -3.1468837 |
| C  | -5.6804024 | -0.6022860 | 0.0220695  |
| C  | -4.3859285 | -0.1689448 | -0.0840923 |
| O  | -4.3660373 | 0.7046387  | -1.2795666 |
| C  | -5.5951498 | 0.8091618  | -1.8236439 |
| C  | -6.5100953 | 0.0010660  | -1.0564609 |
| O  | -3.4235697 | 1.3241348  | -1.8019411 |
| C  | -3.1943285 | -0.4069539 | 0.7315313  |
| H  | -6.9770567 | -0.7330152 | -1.7513355 |
| H  | -7.3208866 | 0.6626140  | -0.6768273 |
| H  | -3.4683751 | -0.6597735 | 1.7749279  |
| H  | -2.5593291 | 0.5015285  | 0.7506978  |
| H  | -6.0884907 | -1.2655556 | 0.7964190  |

|   |            |            |            |
|---|------------|------------|------------|
| C | 4.7524837  | 3.4893960  | 1.2428701  |
| C | 2.5956020  | 4.5976126  | 1.6702094  |
| C | 3.2810079  | 5.8495515  | 1.6829198  |
| C | 1.1786956  | 4.5329438  | 1.7880238  |
| H | 0.6137172  | 5.4691064  | 1.9170353  |
| C | 0.4827414  | 3.3336280  | 1.6799364  |
| C | 3.6607628  | -1.4373091 | 0.4451920  |
| C | 4.7587503  | -1.6637307 | 1.2679137  |
| H | 5.2982823  | -2.6195145 | 1.1852166  |
| C | 5.1568877  | -0.7345935 | 2.2696415  |
| C | 6.2256117  | -1.0327839 | 3.1676269  |
| C | 4.4267851  | 0.5007445  | 2.4249821  |
| C | 4.7576279  | 1.3418277  | 3.5302913  |
| C | 3.3789576  | 0.8149417  | 1.4817263  |
| C | 3.0206804  | -0.1649383 | 0.5481301  |
| O | 0.5598813  | 0.9290495  | 1.5476171  |
| O | 2.0114127  | 0.1103768  | -0.3690357 |
| P | 0.4474949  | 0.1151756  | 0.1215371  |
| O | -0.3019483 | 0.9681938  | -0.9105029 |
| O | -0.0707612 | -1.2864398 | 0.4405581  |
| C | 4.6505832  | 5.9151449  | 1.4795275  |
| C | 5.3861557  | 4.7240602  | 1.2402119  |
| H | 2.6930382  | 6.7677515  | 1.8390794  |
| H | 5.1657157  | 6.8877654  | 1.4839449  |
| H | 5.3325145  | 2.5771515  | 1.0473994  |
| H | 6.4678693  | 4.7795129  | 1.0444735  |
| C | 5.7895481  | 1.0132321  | 4.3984140  |
| C | 6.5448066  | -0.1742466 | 4.2080209  |
| H | 4.1771892  | 2.2591402  | 3.6978342  |
| H | 6.0192157  | 1.6775036  | 5.2455039  |
| H | 7.3667829  | -0.4198082 | 4.8975545  |
| H | 6.7798409  | -1.9741457 | 3.0274112  |
| C | -1.6823403 | 3.8650511  | 0.4935310  |
| C | -1.0111541 | 3.2917101  | 1.6152697  |
| C | -3.0844662 | 3.7877989  | 0.4390363  |
| C | -1.7651779 | 2.6738300  | 2.6489361  |
| C | -3.1700048 | 2.6495524  | 2.5527534  |
| C | -3.8544314 | 3.1963688  | 1.4564021  |
| C | -1.1077542 | 2.0791911  | 3.8935701  |
| H | -3.7393584 | 2.1783540  | 3.3670753  |
| C | -1.4454109 | 0.5889172  | 4.0782561  |
| H | -2.5322592 | 0.4323108  | 4.2430685  |
| H | -0.9151596 | 0.1773586  | 4.9616134  |
| H | -1.1387457 | -0.0002735 | 3.1927212  |
| C | -1.4639822 | 2.9006892  | 5.1469843  |
| H | -0.0091203 | 2.1519535  | 3.7649595  |
| H | -2.5534390 | 2.8680465  | 5.3581488  |
| H | -1.1791119 | 3.9651895  | 5.0237632  |
| H | -0.9375337 | 2.5042519  | 6.0398338  |
| C | -5.3777554 | 3.2111622  | 1.3472647  |
| C | -6.0881482 | 2.2433238  | 2.3010531  |
| H | -7.1774924 | 2.2234268  | 2.0928355  |
| H | -5.9669704 | 2.5537379  | 3.3597692  |
| H | -5.7001461 | 1.2101178  | 2.2024864  |
| C | -5.9171518 | 4.6444184  | 1.5311837  |
| H | -5.6218939 | 2.9007048  | 0.3044941  |
| H | -7.0167700 | 4.6797718  | 1.3846234  |
| H | -5.4529830 | 5.3511678  | 0.8150800  |
| H | -5.6952337 | 5.0123378  | 2.5546558  |
| C | -0.9526370 | 4.6075570  | -0.6290358 |
| C | -1.2059718 | 4.0164902  | -2.0258553 |
| H | -0.7696724 | 4.6645215  | -2.8128037 |
| H | -2.2838913 | 3.8934498  | -2.2544671 |
| H | -0.7068581 | 3.0332596  | -2.1234731 |
| C | -1.3029073 | 6.1084046  | -0.5880663 |
| H | 0.1357962  | 4.5205653  | -0.4451457 |
| H | -0.7119654 | 6.6707074  | -1.3402164 |
| H | -1.0969551 | 6.5471338  | 0.4097784  |
| H | -2.3774400 | 6.2802325  | -0.8076769 |
| H | 1.3659324  | -6.6313616 | -2.1761456 |
| H | 4.8565464  | -2.3516015 | -4.1059406 |

### TS1



Energy (Hartree) = -11970.02370248  
number of imaginary frequencies: 1

|   |           |           |           |
|---|-----------|-----------|-----------|
| C | 1.2553799 | 2.1358238 | 1.5646116 |
| C | 2.6550216 | 2.1163616 | 1.5139855 |
| C | 3.3494936 | 3.3816264 | 1.4831079 |

|    |            |            |            |
|----|------------|------------|------------|
| H  | 4.3800501  | -4.6377571 | 2.0125962  |
| C  | 1.6057521  | -5.8028256 | -2.8780340 |
| H  | 3.2154300  | 0.3700435  | -3.9689479 |
| H  | -0.1084498 | -6.2729348 | -4.1747608 |
| H  | 0.8334490  | -4.0994964 | 3.2355489  |
| C  | 2.1194864  | -4.6455105 | -2.0308480 |
| C  | 5.0604264  | -1.6146992 | -3.3009627 |
| C  | 0.2981953  | -5.4193927 | -3.5920727 |
| H  | 0.4753752  | -4.5806275 | -4.3002102 |
| C  | 2.6610150  | -3.4878082 | -2.6169902 |
| C  | 3.3236025  | -4.8622232 | 2.2633769  |
| H  | 3.5972322  | -6.6067174 | -3.3477366 |
| C  | 2.0406001  | -4.6961475 | -0.6313104 |
| C  | 2.6614965  | -6.3208107 | -3.8687603 |
| H  | 2.2862933  | -7.2096011 | -4.4172567 |
| H  | 1.5820662  | -5.5812399 | -0.1622523 |
| C  | 2.7646888  | -0.5301857 | -3.5031270 |
| H  | 5.7964836  | -2.0713702 | -2.6084616 |
| H  | 5.5334089  | -0.7277094 | -3.7711383 |
| C  | 3.1545944  | -2.4194002 | -1.8468318 |
| C  | 0.9122746  | -4.0828344 | 2.1286062  |
| C  | 2.5124961  | -3.6556131 | 0.1888349  |
| H  | 3.2408880  | -4.9278791 | 3.3681874  |
| H  | 3.0904743  | -5.8649059 | 1.8476958  |
| C  | 3.7691928  | -1.2171677 | -2.5611670 |
| C  | 3.1042838  | -2.5160331 | -0.4292034 |
| C  | 2.3633028  | -3.7950995 | 1.7052215  |
| H  | 1.8553233  | -0.2033565 | -2.9633933 |
| H  | 0.2297724  | -3.3055356 | 1.7386610  |
| H  | 2.4452964  | -1.2005333 | -4.3280947 |
| H  | -0.4690733 | -5.1018848 | -2.8569320 |
| H  | 0.5503996  | -5.0619085 | 1.7538449  |
| H  | 2.9217220  | -5.5514843 | -4.6254576 |
| H  | 4.0572191  | -0.4752268 | -1.7893969 |
| H  | 2.6417268  | -2.8246179 | 2.1623742  |
| H  | 2.7200177  | -3.4159838 | -3.7151083 |
| Zn | -1.5422809 | 0.7417181  | -2.3840814 |
| Br | -0.9777623 | 0.9046136  | -4.6191635 |
| Zn | -1.9727140 | -1.9073405 | 0.1050251  |
| Br | -2.0954977 | -4.1935579 | -0.4537800 |
| H  | -3.6029393 | 4.2095147  | -0.4377411 |
| C  | -5.4948125 | -3.0153099 | -4.2807750 |
| C  | -4.4629099 | -2.4212316 | -3.5535980 |
| C  | -3.1290985 | -2.8627324 | -3.7311075 |
| C  | -2.8462141 | -3.8996988 | -4.6503659 |
| C  | -3.8847125 | -4.4917139 | -5.3772837 |
| C  | -5.2068515 | -4.0520782 | -5.1910049 |
| H  | -6.5328338 | -2.6746185 | -4.1477657 |
| C  | -2.0423279 | -2.2337774 | -2.9946592 |
| H  | -1.8079705 | -4.2352036 | -4.7854124 |
| H  | -3.6667077 | -5.2988396 | -6.0922667 |
| H  | -6.0237764 | -4.5194098 | -5.7623542 |
| O  | -2.2247588 | -1.2641455 | -2.2177384 |
| H  | -4.6577335 | -1.6093947 | -2.8396233 |
| H  | -1.0079856 | -2.6137543 | -3.1738384 |
| C  | -5.6608280 | -0.5805050 | 0.0460950  |
| C  | -4.3619362 | -0.1621405 | -0.0590998 |
| C  | -4.3303718 | 0.7172398  | -1.2544161 |
| O  | -5.5628013 | 0.8364220  | -1.7957765 |
| C  | -6.4839959 | 0.0399350  | -1.0295874 |
| O  | -3.3833762 | 1.3253561  | -1.7726241 |
| C  | -3.1740904 | -0.4172615 | 0.7537335  |
| H  | -6.9640826 | -0.6854391 | -1.7257896 |
| H  | -7.2842617 | 0.7119664  | -0.6441527 |
| H  | -3.4483738 | -0.6784762 | 1.7948896  |
| H  | -2.5294405 | 0.4839915  | 0.7784766  |
| H  | -6.0740363 | -1.2424427 | 0.8187833  |

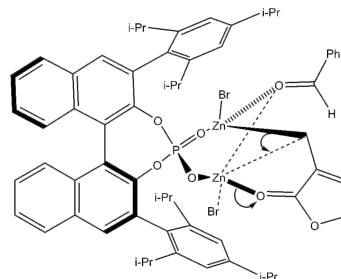

Energy (Hartree) = -11970.0286547

|   |            |            |            |
|---|------------|------------|------------|
| C | 0.8141822  | 2.0649627  | 1.7048977  |
| C | 2.2138875  | 2.0567497  | 1.6972351  |
| C | 2.8993923  | 3.3263662  | 1.7117686  |
| C | 4.3090657  | 3.4477955  | 1.5219248  |
| C | 2.1285418  | 4.5329179  | 1.8939005  |
| C | 2.8022725  | 5.7907336  | 1.9455096  |
| C | 0.7094223  | 4.4544116  | 1.9777877  |
| H | 0.1350848  | 5.3832436  | 2.1169253  |
| C | 0.0267533  | 3.2506042  | 1.8343213  |
| C | 3.2794841  | -1.4747046 | 0.6131234  |
| C | 4.3349437  | -1.7167548 | 1.4837453  |
| H | 4.8954647  | -2.6598288 | 1.3986115  |
| C | 4.6807339  | -0.8045746 | 2.5209286  |
| C | 5.7073281  | -1.1158381 | 3.4629289  |
| C | 3.9446414  | 0.4292488  | 2.6583016  |
| C | 4.2234776  | 1.2557996  | 3.7890457  |
| C | 2.9414331  | 0.7577917  | 1.6721956  |
| C | 2.6259713  | -0.2079833 | 0.7095021  |
| O | 0.1331162  | 0.8540969  | 1.6332864  |
| O | 1.6567663  | 0.0803625  | -0.2520473 |
| P | 0.0751659  | 0.0690510  | 0.1885508  |
| O | -0.6252418 | 0.9400772  | -0.8757307 |
| O | -0.4679588 | -1.3241756 | 0.4926308  |
| C | 4.1776233  | 5.8700005  | 1.7866919  |
| C | 4.9319311  | 4.6879837  | 1.5569356  |
| H | 2.2024198  | 6.7019988  | 2.0970873  |
| H | 4.6840595  | 6.8466291  | 1.8211008  |
| H | 4.9037401  | 2.5428320  | 1.3352497  |
| H | 6.0192923  | 4.7555408  | 1.3996754  |
| C | 5.2139784  | 0.9147223  | 4.7001524  |
| C | 5.9776765  | -0.2708685 | 4.5287595  |
| H | 3.6363395  | 2.1714065  | 3.9427603  |
| H | 5.4039474  | 1.5670727  | 5.5661816  |
| H | 6.7667005  | -0.5259206 | 5.2525700  |
| H | 6.2683575  | -2.0550246 | 3.3357189  |
| C | -2.1469460 | 3.8186198  | 0.6773750  |
| C | -1.4659928 | 3.1918795  | 1.7644444  |
| C | -3.5516779 | 3.7652138  | 0.6423862  |
| C | -2.2124111 | 2.5139081  | 2.7679073  |
| C | -3.6181580 | 2.4960694  | 2.6817227  |
| C | -4.3124981 | 3.1214709  | 1.6340343  |
| C | -1.5520613 | 1.8538710  | 3.9776001  |
| H | -4.1838510 | 1.9802784  | 3.4718294  |
| C | -1.9100468 | 0.3613251  | 4.0928161  |
| H | -2.9943013 | 0.2119588  | 4.2788280  |
| H | -1.3621356 | -0.1042023 | 4.9378964  |
| H | -1.6360775 | -0.1841234 | 3.1687683  |
| C | -1.8884805 | 2.6215633  | 5.2703755  |
| H | -0.4537431 | 1.9180718  | 3.8465299  |
| H | -2.9772180 | 2.5952610  | 5.4862882  |
| H | -1.5867774 | 3.6861120  | 5.1950075  |
| H | -1.3624475 | 2.1752135  | 6.1396535  |
| C | -5.8353064 | 3.1868161  | 1.5754334  |
| C | -6.5425650 | 2.0193884  | 2.2776141  |
| H | -7.6337448 | 2.0545002  | 2.0815164  |
| H | -6.4121471 | 2.0643126  | 3.3790096  |

TS2; COSMO



|    |            |            |            |
|----|------------|------------|------------|
| H  | -6.1578219 | 1.0379736  | 1.9356536  |
| C  | -6.3271107 | 4.5368420  | 2.1366668  |
| H  | -6.1148544 | 3.1540482  | 0.4983401  |
| H  | -7.4294772 | 4.6287885  | 2.0455008  |
| H  | -5.8644265 | 5.3900158  | 1.6011703  |
| H  | -6.0618107 | 4.6299931  | 3.2107435  |
| C  | -1.4241086 | 4.5782606  | -0.4383124 |
| C  | -1.7369278 | 4.0312993  | -1.8416530 |
| H  | -1.2659392 | 4.6638392  | -2.6216720 |
| H  | -2.8235204 | 3.9881633  | -2.0565495 |
| H  | -1.3103007 | 3.0166399  | -1.9714780 |
| C  | -1.7313815 | 6.0861350  | -0.3518387 |
| H  | -0.3341004 | 4.4535509  | -0.2867749 |
| H  | -1.1519844 | 6.6496090  | -1.1120979 |
| H  | -1.4780130 | 6.4964160  | 0.6470874  |
| H  | -2.8081211 | 6.2892543  | -0.5297730 |
| H  | 0.3965630  | -5.7771011 | -2.9436603 |
| H  | 5.2023715  | -2.3858508 | -3.6907976 |
| H  | 3.7222504  | -4.3921497 | 2.0860380  |
| C  | 1.4732694  | -5.5818914 | -3.1559451 |
| H  | 3.8534810  | 0.4924503  | -3.6114027 |
| H  | 1.1431175  | -6.0516661 | -5.2631183 |
| H  | 0.0427731  | -4.2679932 | 2.9331808  |
| C  | 1.8973277  | -4.4501877 | -2.2226972 |
| C  | 5.3424370  | -1.7262611 | -2.8086788 |
| C  | 1.6091257  | -5.2557114 | -4.6479601 |
| H  | 2.6754603  | -5.1906939 | -4.9513304 |
| C  | 2.6977255  | -3.3747272 | -2.6398661 |
| C  | 2.6770700  | -4.7365014 | 2.2096292  |
| H  | 2.1358527  | -7.1548453 | -1.7556924 |
| C  | 1.5337471  | -4.5117986 | -0.8625025 |
| C  | 2.2546377  | -6.8688913 | -2.8198621 |
| H  | 1.9085219  | -7.7184852 | -3.4446502 |
| H  | 0.8825632  | -5.3349025 | -0.5280293 |
| C  | 3.2378947  | -0.3741816 | -3.2927840 |
| H  | 5.8982312  | -2.3043013 | -2.0425840 |
| H  | 5.9786948  | -0.8738637 | -3.1256109 |
| C  | 3.1405707  | -2.3832143 | -1.7411016 |
| C  | 0.2322572  | -4.2532508 | 1.8402021  |
| C  | 1.9873135  | -3.5771824 | 0.0826546  |
| H  | 2.4800990  | -4.8462103 | 3.2964634  |
| H  | 2.6008997  | -5.7425814 | 1.7457850  |
| C  | 3.9936420  | -1.2273062 | -2.2590947 |
| C  | 2.8031904  | -2.4988318 | -0.3701162 |
| C  | 1.6625485  | -3.7689401 | 1.5650809  |
| H  | 2.2931082  | 0.0152599  | -2.8636495 |
| H  | -0.5185644 | -3.5951501 | 1.3692333  |
| H  | 2.9929959  | -0.9620194 | -4.2019698 |
| H  | 1.1260767  | -4.2966921 | -4.9114507 |
| H  | 0.0570460  | -5.2831921 | 1.4665145  |
| H  | 3.3386656  | -6.7220883 | -3.0099925 |
| H  | 4.2219837  | -0.5679808 | -1.3964858 |
| H  | 1.7729757  | -2.7805873 | 2.0579901  |
| H  | 2.9858665  | -3.2916125 | -3.6983989 |
| Zn | -2.3112979 | 0.7685887  | -1.8177801 |
| Br | -2.4482541 | 0.7434634  | -4.1482845 |
| Zn | -2.1610098 | -2.0072790 | -0.4257382 |
| Br | -2.9523148 | -4.2339229 | -0.3488201 |
| H  | -4.0814341 | 4.2409046  | -0.1986498 |
| C  | 0.5755827  | -1.5741754 | -6.1276697 |
| C  | 0.0293836  | -1.6418235 | -4.8443539 |
| C  | -0.9749985 | -2.5996899 | -4.5621114 |
| C  | -1.4300281 | -3.4770219 | -5.5744752 |
| C  | -0.8894954 | -3.3930978 | -6.8627224 |
| C  | 0.1142497  | -2.4454413 | -7.1351121 |
| H  | 1.3609945  | -0.8375918 | -6.3541483 |
| C  | -1.5565905 | -2.6904392 | -3.2347221 |
| H  | -2.2078019 | -4.2206146 | -5.3390705 |
| H  | -1.2407518 | -4.0692878 | -7.6561304 |
| H  | 0.5457142  | -2.3851349 | -8.1463172 |
| O  | -1.2826958 | -1.8936426 | -2.3145386 |

|   |            |            |            |
|---|------------|------------|------------|
| H | 0.3622430  | -0.9735183 | -4.0388461 |
| H | -2.2859314 | -3.5172214 | -3.0397746 |
| C | -6.0045317 | -0.9500427 | -0.0025089 |
| C | -4.7952010 | -0.3357169 | -0.1574073 |
| C | -5.0414662 | 0.8109696  | -1.0452628 |
| O | -6.3394963 | 0.9328595  | -1.3521263 |
| C | -7.0446181 | -0.1787318 | -0.7481797 |
| O | -4.1861188 | 1.5989931  | -1.4897593 |
| C | -3.4346299 | -0.5490422 | 0.3320257  |
| H | -7.5360728 | -0.7446833 | -1.5697554 |
| H | -7.8429672 | 0.2342416  | -0.0931278 |
| H | -3.4404695 | -1.1415891 | 1.2723965  |
| H | -2.9736952 | 0.4252437  | 0.6037443  |
| H | -6.2239564 | -1.8478324 | 0.5905342  |

## TS2

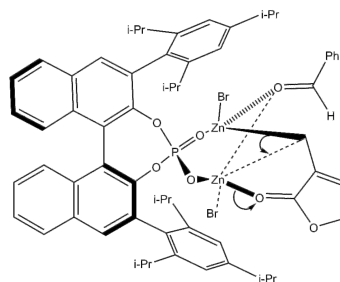

Energy (Hartree) = -11970.01360975  
number of imaginary frequencies: 2

|   |            |            |            |
|---|------------|------------|------------|
| C | 0.8542706  | 2.0828872  | 1.6909569  |
| C | 2.2540965  | 2.0841591  | 1.6813039  |
| C | 2.9304252  | 3.3581081  | 1.6973365  |
| C | 4.3385366  | 3.4890515  | 1.5049119  |
| C | 2.1518156  | 4.5590617  | 1.8822007  |
| C | 2.8177733  | 5.8204579  | 1.9339276  |
| C | 0.7333775  | 4.4709937  | 1.9653982  |
| H | 0.1519434  | 5.3955901  | 2.1029830  |
| C | 0.0585350  | 3.2632348  | 1.8202813  |
| C | 3.3006973  | -1.4651162 | 0.6336947  |
| C | 4.3480494  | -1.7061346 | 1.5140364  |
| H | 4.8903982  | -2.6614427 | 1.4505652  |
| C | 4.7032031  | -0.7820505 | 2.5368366  |
| C | 5.7235608  | -1.0903356 | 3.4857990  |
| C | 3.9810755  | 0.4617413  | 2.6535601  |
| C | 4.2671642  | 1.3014227  | 3.7725983  |
| C | 2.9851272  | 0.7868560  | 1.6590800  |
| C | 2.6660716  | -0.1860769 | 0.7043016  |
| O | 0.1814000  | 0.8672098  | 1.6236767  |
| O | 1.7024931  | 0.1025756  | -0.2624763 |
| P | 0.1211772  | 0.0855254  | 0.1764778  |
| O | -0.5916832 | 0.9450003  | -0.8873047 |
| O | -0.4053731 | -1.3151411 | 0.4801523  |
| C | 4.1918329  | 5.9091430  | 1.7733959  |
| C | 4.9532415  | 4.7327807  | 1.5414319  |
| H | 2.2118331  | 6.7275656  | 2.0862636  |
| H | 4.6915137  | 6.8891928  | 1.8078370  |
| H | 4.9374542  | 2.5871867  | 1.3169888  |
| H | 6.0398496  | 4.8075705  | 1.3826631  |
| C | 5.2514275  | 0.9628635  | 4.6906543  |
| C | 6.0015186  | -0.2332644 | 4.5391427  |
| H | 3.6898150  | 2.2254340  | 3.9108166  |
| H | 5.4470809  | 1.6264323  | 5.5467770  |
| H | 6.7862157  | -0.4864762 | 5.2681902  |
| H | 6.2736452  | -2.0378870 | 3.3739573  |
| C | -2.1200592 | 3.8153947  | 0.6671729  |
| C | -1.4335235 | 3.1928036  | 1.7525936  |

|   |            |            |             |    |            |            |            |
|---|------------|------------|-------------|----|------------|------------|------------|
| C | -3.5231495 | 3.7395239  | 0.6270600   | H  | 1.8292655  | -2.7140437 | 2.1575460  |
| C | -2.1728590 | 2.4990535  | 2.7503538   | H  | 2.8625085  | -3.3925789 | -3.6219109 |
| C | -3.5774252 | 2.4550714  | 2.6562061   | Zn | -2.3146494 | 0.7691962  | -1.7683310 |
| C | -4.2769605 | 3.0720092  | 1.6075693   | Br | -2.6269294 | 0.7532384  | -4.0766982 |
| C | -1.5062783 | 1.8481055  | 3.9615178   | Zn | -2.0395765 | -2.0630606 | -0.4680725 |
| H | -4.1375857 | 1.9209352  | 3.4382349   | Br | -2.7696787 | -4.2959896 | -0.4801111 |
| C | -1.8561313 | 0.3549851  | 4.0885168   | H  | -4.0579948 | 4.2054273  | -0.2157529 |
| H | -2.9378047 | 0.1997151  | 4.2842105   | C  | 0.5358607  | -1.2540906 | -6.1977314 |
| H | -1.2997028 | -0.1034678 | 4.9317007   | C  | 0.0228953  | -1.4134409 | -4.9089794 |
| H | -1.5853961 | -0.1950249 | 3.1661427   | C  | -0.9727391 | -2.3900684 | -4.6686015 |
| C | -1.8422212 | 2.6248901  | 5.2489119   | C  | -1.4479397 | -3.1985119 | -5.7265192 |
| H | -0.4087794 | 1.9163178  | 3.8268313   | C  | -0.9435432 | -3.0217595 | -7.0193567 |
| H | -2.9303893 | 2.5965494  | 5.4672646   | C  | 0.0476026  | -2.0508392 | -7.2518215 |
| H | -1.5459742 | 3.6899970  | 5.1635503   | H  | 1.3126390  | -0.4989385 | -6.3900852 |
| H | -1.3127144 | 2.1886512  | 6.1211638   | C  | -1.5057859 | -2.5777540 | -3.3288934 |
| C | -5.7995634 | 3.0889749  | 1.5254089   | H  | -2.2173297 | -3.9602467 | -5.5231104 |
| C | -6.4775209 | 1.8706961  | 2.1682029   | H  | -1.3165769 | -3.6398407 | -7.8494166 |
| H | -7.5658160 | 1.8764350  | 1.9532372   | H  | 0.4492677  | -1.9165353 | -8.2682628 |
| H | -6.3682181 | 1.8751304  | 3.2727856   | O  | -1.2297314 | -1.8185865 | -2.3806773 |
| H | -6.0553297 | 0.9156158  | 1.7968362   | H  | 0.3695933  | -0.7978155 | -4.0682897 |
| C | -6.3491988 | 4.3981647  | 2.1270058   | H  | -2.2008897 | -3.4383144 | -3.1513551 |
| H | -6.0575583 | 3.0865110  | 0.4427557   | C  | -5.8922754 | -1.1830527 | -0.1660122 |
| H | -7.4523308 | 4.4561831  | 2.0183507   | C  | -4.7302130 | -0.4727700 | -0.2438145 |
| H | -5.9068572 | 5.2861443  | 1.6328898   | C  | -5.0398106 | 0.7238831  | -1.0473820 |
| H | -6.1065792 | 4.4613816  | 3.2084614   | O  | -6.3405011 | 0.7729021  | -1.3767388 |
| C | -1.4066273 | 4.5831276  | -0.4489437  | C  | -6.9708233 | -0.4278514 | -0.8775429 |
| C | -1.7278799 | 4.0421802  | -1.8526638  | O  | -4.2345896 | 1.6038286  | -1.3891429 |
| H | -1.2599394 | 4.6764443  | -2.6331909  | C  | -3.3650145 | -0.6156009 | 0.2551612  |
| H | -2.8150591 | 4.0033707  | -2.0659175  | H  | -7.4071936 | -0.9626271 | -1.7505047 |
| H | -1.3056613 | 3.0269924  | -1.9907038  | H  | -7.8095304 | -0.1239957 | -0.2117164 |
| C | -1.7180562 | 6.0892820  | -0.3506736  | H  | -3.3449787 | -1.2291732 | 1.1826812  |
| H | -0.3152260 | 4.4603154  | -0.3048934  | H  | -2.9703743 | 0.3755154  | 0.5697542  |
| H | -1.1479390 | 6.6606103  | -1.1120663  | H  | -6.0504101 | -2.1428822 | 0.3433560  |
| H | -1.4593067 | 6.4950217  | 0.6485859   |    |            |            |            |
| H | -2.7969996 | 6.2894063  | -0.5180076  |    |            |            |            |
| H | 0.2454647  | -5.8406134 | -2.6683057  |    |            |            |            |
| H | 5.1408859  | -2.5904679 | -3.6507018  |    |            |            |            |
| H | 3.7170541  | -4.3967068 | 2.1478893   |    |            |            |            |
| C | 1.2934959  | -5.6208140 | -2.9760655  |    |            |            |            |
| H | 3.9177651  | 0.3464552  | -3.6544397  |    |            |            |            |
| H | 0.7948517  | -6.1133537 | -5.0467565  |    |            |            |            |
| H | 0.0748887  | -4.1180972 | 3.1133558   |    |            |            |            |
| C | 1.7685880  | -4.4723966 | -2.0901125  |    |            |            |            |
| C | 5.3140422  | -1.9097639 | -2.7908995  |    |            |            |            |
| C | 1.2931260  | -5.3032578 | -4.4764984  |    |            |            |            |
| H | 2.3272628  | -5.2196186 | -4.8724263  |    |            |            |            |
| C | 2.5963748  | -3.4373075 | -2.5549359  |    |            |            |            |
| C | 2.6645270  | -4.6998907 | 2.3112148   |    |            |            |            |
| H | 2.1241499  | -7.1577195 | -1.6294457  |    |            |            |            |
| C | 1.4435041  | -4.4909934 | -0.7199538  |    |            |            |            |
| C | 2.1380453  | -6.8820968 | -2.7028475  |    |            |            |            |
| H | 1.7623291  | -7.7483385 | -3.2863485  |    |            |            |            |
| H | 0.7729669  | -5.2825236 | -0.3498842  |    |            |            |            |
| C | 3.2676482  | -0.4838812 | -3.3085746  |    |            |            |            |
| H | 5.8476290  | -2.4877853 | -2.0095211  |    |            |            |            |
| H | 5.9855849  | -1.0966949 | -3.1371376  |    |            |            |            |
| C | 3.0965111  | -2.4410256 | -1.6921830  |    |            |            |            |
| C | 0.2282558  | -4.1310245 | 2.0148177   |    |            |            |            |
| C | 1.9532667  | -3.5508207 | 0.1897759   |    |            |            |            |
| H | 2.5002018  | -4.7870154 | 3.4054015   |    |            |            |            |
| H | 2.5371593  | -5.7086521 | 1.8653217   |    |            |            |            |
| C | 3.9905122  | -1.3364527 | -2.2525130  |    |            |            |            |
| C | 2.7885950  | -2.5084179 | -0.3109167  |    |            |            |            |
| C | 1.6659844  | -3.7045502 | 1.6844667   |    |            |            |            |
| H | 2.3435446  | -0.0413246 | -2.8863113  |    |            |            |            |
| H | -0.5131189 | -3.4540892 | 1.5559015   |    |            |            |            |
| H | 2.9937636  | -1.0863332 | -4.1997885  |    |            |            |            |
| H | 0.7736673  | -4.3549571 | -4.7042840  |    |            |            |            |
| H | 0.0009743  | -5.1594870 | 1.6668876   |    |            |            |            |
| H | 3.1959944  | -6.7068473 | -2.9900822  |    |            |            |            |
| H | 4.2506482  | -0.6607243 | -1.41117140 |    |            |            |            |

### TS3; COSMO

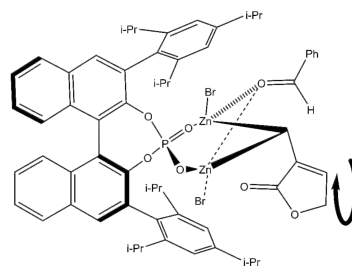

Energy (Hartree) = -11970.02533973

|   |           |            |           |
|---|-----------|------------|-----------|
| C | 0.8030431 | 2.1307741  | 1.9948133 |
| C | 2.2009499 | 2.1209484  | 2.0482056 |
| C | 2.8778727 | 3.3956632  | 2.1104861 |
| C | 4.2930145 | 3.5305662  | 1.9807331 |
| C | 2.0914025 | 4.5950366  | 2.2774952 |
| C | 2.7545503 | 5.8547735  | 2.3869283 |
| C | 0.6692023 | 4.5149374  | 2.2654421 |
| H | 0.0857792 | 5.4433637  | 2.3600437 |
| C | 0.0028607 | 3.3123808  | 2.0578802 |
| C | 3.3034230 | -1.3896836 | 0.9236683 |
| C | 4.3606736 | -1.6331552 | 1.7922844 |
| H | 4.9214584 | -2.5760782 | 1.7052762 |
| C | 4.6888334 | -0.7342017 | 2.8466651 |
| C | 5.7107473 | -1.0524208 | 3.7916229 |
| C | 3.9326282 | 0.4852568  | 3.0056740 |
| C | 4.1858134 | 1.2868172  | 4.1599751 |
| C | 2.9351673 | 0.8250327  | 2.0164750 |
| C | 2.6405557 | -0.1296988 | 1.0353752 |
| O | 0.1195569 | 0.9172402  | 1.9102330 |
| O | 1.6758853 | 0.1532342  | 0.0677686 |
| P | 0.0905121 | 0.1362177  | 0.4758833 |

|   |            |            |            |    |            |            |            |
|---|------------|------------|------------|----|------------|------------|------------|
| O | -0.6166646 | 0.9166122  | -0.6449507 | H  | 5.5590076  | -0.6663492 | -3.1099355 |
| O | -0.4501713 | -1.2673496 | 0.8096939  | C  | 2.9612912  | -2.2952753 | -1.4248187 |
| C | 4.1351824  | 5.9452575  | 2.2934501  | C  | 0.4401604  | -4.1151029 | 2.3963290  |
| C | 4.9059338  | 4.7731998  | 2.0694939  | C  | 2.0849813  | -3.5512172 | 0.5057349  |
| H | 2.1420731  | 6.7593789  | 2.5269439  | H  | 2.7665979  | -4.9399628 | 3.6366681  |
| H | 4.6330836  | 6.9237200  | 2.3718781  | H  | 2.6645676  | -5.8097254 | 2.0704177  |
| H | 4.9024163  | 2.6347802  | 1.7985251  | C  | 3.6952800  | -1.1054137 | -2.0388531 |
| H | 5.9984546  | 4.8499365  | 1.9592826  | C  | 2.7912562  | -2.4291943 | -0.0238884 |
| C | 5.1712715  | 0.9381295  | 5.0736215  | C  | 1.8843276  | -3.7584064 | 2.0087078  |
| C | 5.9560854  | -0.2302184 | 4.8809225  | H  | 1.8685824  | 0.0169012  | -2.4941352 |
| H | 3.5817905  | 2.1883074  | 4.3302746  | H  | -0.2671793 | -3.3423002 | 2.0427195  |
| H | 5.3404405  | 1.5706962  | 5.9583765  | H  | 2.5024669  | -0.9285422 | -3.8836621 |
| H | 6.7413318  | -0.4907938 | 5.6068241  | H  | 0.9378107  | -4.3214021 | -4.4790575 |
| H | 6.2872985  | -1.9797240 | 3.6480264  | H  | 0.1176434  | -5.0896466 | 1.9764283  |
| C | -1.9826453 | 3.7848363  | 0.5810973  | H  | 3.0163328  | -6.8551366 | -2.5221542 |
| C | -1.4665414 | 3.2290975  | 1.7914811  | H  | 3.9733423  | -0.4193458 | -1.2127081 |
| C | -3.3536136 | 3.6376025  | 0.3058811  | H  | 2.1232415  | -2.8009076 | 2.5140084  |
| C | -2.3342512 | 2.5417065  | 2.6818182  | H  | 2.6232124  | -3.1967411 | -3.3585102 |
| C | -3.7028767 | 2.4438188  | 2.3646683  | Zn | -2.2815824 | 0.2825844  | -1.5076290 |
| C | -4.2409854 | 2.9914633  | 1.1884629  | Br | -3.0412811 | 1.2022137  | -3.4981352 |
| C | -1.8460044 | 1.9546708  | 4.0047974  | Zn | -1.7022165 | -2.2070940 | -0.3806752 |
| H | -4.3701014 | 1.9305866  | 3.0726722  | Br | -2.1169689 | -4.5051474 | -0.4909764 |
| C | -2.1925716 | 0.4614767  | 4.1439271  | H  | -3.7573032 | 4.0534133  | -0.6316429 |
| H | -3.2892370 | 0.2991942  | 4.2001571  | C  | -0.0637891 | -0.0156761 | -6.1090398 |
| H | -1.7499733 | 0.0449874  | 5.0722723  | C  | -0.3221697 | -0.4761210 | -4.8162407 |
| H | -1.7999502 | -0.1204679 | 3.2870165  | C  | -0.7428035 | -1.8177737 | -4.6214341 |
| C | -2.3827872 | 2.7726919  | 5.1950448  | C  | -0.9082934 | -2.6815196 | -5.7352975 |
| H | -0.7409500 | 2.0408890  | 4.0292665  | C  | -0.6537579 | -2.2098170 | -7.0254832 |
| H | -3.4912109 | 2.7335627  | 5.2433782  | C  | -0.2293958 | -0.8791187 | -7.2090635 |
| H | -2.0880956 | 3.8388253  | 5.1147859  | H  | 0.2630605  | 1.0226149  | -6.2663643 |
| H | -1.9887512 | 2.3774955  | 6.1544521  | C  | -1.0168972 | -2.3256675 | -3.2965511 |
| C | -5.7314070 | 2.9725324  | 0.8726769  | H  | -1.2427959 | -3.7183770 | -5.5745589 |
| C | -6.5172308 | 1.8836007  | 1.6107156  | H  | -0.7838506 | -2.8730499 | -7.8932394 |
| H | -7.5600498 | 1.8474409  | 1.2370089  | H  | -0.0249587 | -0.5096702 | -8.2258985 |
| H | -6.5635183 | 2.0718249  | 2.7044539  | O  | -0.9984663 | -1.6097275 | -2.2639083 |
| H | -6.0721425 | 0.8822720  | 1.4466864  | H  | -0.2022297 | 0.1806518  | -3.9447411 |
| C | -6.3426930 | 4.3645599  | 1.1339533  | H  | -1.2675422 | -3.4090122 | -3.1841538 |
| H | -5.8180764 | 2.7563009  | -0.2120460 | C  | -4.8253639 | -2.5115557 | -2.0489258 |
| H | -7.4140227 | 4.3849734  | 0.8448281  | C  | -4.6331732 | -1.3664228 | -1.3468313 |
| H | -5.8185771 | 5.1547234  | 0.5592560  | C  | -5.7167343 | -0.4169486 | -1.7507285 |
| H | -6.2730658 | 4.6301938  | 2.2102982  | O  | -6.5095677 | -1.0286570 | -2.6884337 |
| C | -1.1134028 | 4.5658688  | -0.4067318 | C  | -6.0165020 | -2.3483920 | -2.9381306 |
| C | -1.2343836 | 4.0675625  | -1.8546483 | O  | -5.9349111 | 0.7060753  | -1.3437362 |
| H | -0.5652742 | 4.6547479  | -2.5173205 | C  | -3.5914276 | -0.9459938 | -0.3729156 |
| H | -2.2642418 | 4.1659368  | -2.2538368 | H  | -5.7577706 | -2.4383762 | -4.0180051 |
| H | -0.9487734 | 3.0019438  | -1.9330434 | H  | -6.8261759 | -3.0832717 | -2.7281846 |
| C | -1.4229301 | 6.0733580  | -0.3136650 | H  | -3.5483864 | -1.6501180 | 0.4948625  |
| H | -0.0548473 | 4.4256567  | -0.1113967 | H  | -3.9047301 | -0.0014801 | 0.1343935  |
| H | -0.7507898 | 6.6554789  | -0.9779715 | H  | -4.2228505 | -3.4302998 | -1.9974682 |
| H | -1.3005239 | 6.4564081  | 0.7200179  |    |            |            |            |
| H | -2.4688118 | 6.2829790  | -0.6216440 |    |            |            |            |
| H | 0.1726922  | -5.6488490 | -2.4387553 |    |            |            |            |
| H | 4.8104230  | -2.2262405 | -3.5728093 |    |            |            |            |
| H | 3.9201334  | -4.5604445 | 2.3155874  |    |            |            |            |
| C | 1.2587624  | -5.5521765 | -2.6742534 |    |            |            |            |
| H | 3.3189634  | 0.5831076  | -3.3863712 |    |            |            |            |
| H | 0.9135478  | -6.0884279 | -4.7621532 |    |            |            |            |
| H | 0.3520347  | -4.1847102 | 3.5001453  |    |            |            |            |
| C | 1.7817609  | -4.4282848 | -1.7815868 |    |            |            |            |
| C | 5.0053990  | -1.5447864 | -2.7181993 |    |            |            |            |
| C | 1.3987636  | -5.2817422 | -4.1764476 |    |            |            |            |
| H | 2.4653091  | -5.2465644 | -4.4834173 |    |            |            |            |
| C | 2.4630478  | -3.3037022 | -2.2755685 |    |            |            |            |
| C | 2.8663765  | -4.8227935 | 2.5375421  |    |            |            |            |
| H | 1.7947350  | -7.1529822 | -1.2474063 |    |            |            |            |
| C | 1.5919262  | -4.5147776 | -0.3881674 |    |            |            |            |
| C | 1.9258733  | -6.8959404 | -2.3168197 |    |            |            |            |
| H | 1.4946711  | -7.7223587 | -2.9187476 |    |            |            |            |
| H | 1.0305684  | -5.3707571 | 0.0160052  |    |            |            |            |
| C | 2.7931783  | -0.3163295 | -3.0043380 |    |            |            |            |
| H | 5.6672123  | -2.0794110 | -2.0068475 |    |            |            |            |

### TS3

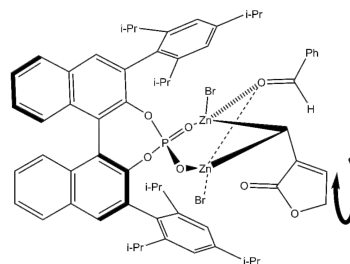

Energy (Hartree) = -11970.01245694  
number of imaginary frequencies: 1

|   |           |           |           |
|---|-----------|-----------|-----------|
| C | 0.7970066 | 2.1210729 | 1.9912857 |
| C | 2.1949927 | 2.1129799 | 2.0436657 |
| C | 2.8713081 | 3.3880558 | 2.1003942 |
| C | 4.2862845 | 3.5232300 | 1.9716387 |
| C | 2.0842866 | 4.5876313 | 2.2611141 |
| C | 2.7470704 | 5.8474917 | 2.3651061 |



|   |            |            |            |    |            |            |            |
|---|------------|------------|------------|----|------------|------------|------------|
| C | 0.6625712  | 4.5059813  | 2.2483809  | H  | 0.9390509  | -6.1067836 | -4.7672212 |
| H | 0.0773214  | 5.4338561  | 2.3364286  | H  | 0.3366811  | -4.1953775 | 3.4887133  |
| C | -0.0039126 | 3.3025972  | 2.0471134  | C  | 1.7908313  | -4.4393428 | -1.7856402 |
| C | 3.2991517  | -1.3973375 | 0.9219139  | C  | 5.0125914  | -1.5514327 | -2.7139824 |
| C | 4.3577143  | -1.6384720 | 1.7892149  | C  | 1.4191496  | -5.2979698 | -4.1799949 |
| H | 4.9186807  | -2.5811516 | 1.7009439  | H  | 2.4867492  | -5.2613686 | -4.4829241 |
| C | 4.6865722  | -0.7387807 | 2.8423361  | C  | 2.4732126  | -3.3150269 | -2.2779485 |
| C | 5.7099124  | -1.0537697 | 3.7860970  | C  | 2.8598697  | -4.8216542 | 2.5391803  |
| C | 3.9292572  | 0.4797988  | 3.0008121  | H  | 1.8086016  | -7.1623500 | -1.2468735 |
| C | 4.1837371  | 1.2834130  | 4.1530985  | C  | 1.5933953  | -4.5236998 | -0.3934893 |
| C | 2.9300289  | 0.8176332  | 2.0130407  | C  | 1.9426464  | -6.9074349 | -2.3161910 |
| C | 2.6345022  | -0.1381558 | 1.0331493  | H  | 1.5160707  | -7.7367928 | -2.9173770 |
| O | 0.1155526  | 0.9062835  | 1.9126897  | H  | 1.0285675  | -5.3782513 | 0.0086163  |
| O | 1.6686615  | 0.1418678  | 0.0669390  | C  | 2.7991705  | -0.3246293 | -3.0034205 |
| P | 0.0838976  | 0.1245281  | 0.4790678  | H  | 5.6724752  | -2.0868804 | -2.0017934 |
| O | -0.6288071 | 0.9040387  | -0.6382918 | H  | 5.5672293  | -0.6726766 | -3.1034595 |
| O | -0.4514123 | -1.2813787 | 0.8125042  | C  | 2.9661830  | -2.3051672 | -1.4261574 |
| C | 4.1272218  | 5.9384578  | 2.2730194  | C  | 0.4304823  | -4.1301274 | 2.3852557  |
| C | 4.8983639  | 4.7661234  | 2.0556633  | C  | 2.0814061  | -3.5590228 | 0.5015091  |
| H | 2.1337857  | 6.7523541  | 2.4997542  | H  | 2.7556048  | -4.9381023 | 3.6378640  |
| H | 4.6243386  | 6.9175731  | 2.3474669  | H  | 2.6670692  | -5.8104559 | 2.0725287  |
| H | 4.8954367  | 2.6263532  | 1.7946848  | C  | 3.7004579  | -1.1141956 | -2.0376746 |
| H | 5.9909929  | 4.8425563  | 1.9467931  | C  | 2.7897753  | -2.4376660 | -0.0261932 |
| C | 5.1710655  | 0.9375305  | 5.0650835  | C  | 1.8739218  | -3.7642605 | 2.0037651  |
| C | 5.9563998  | -0.2299140 | 4.8731986  | H  | 1.8743290  | 0.0077678  | -2.4933347 |
| H | 3.5787832  | 2.1845325  | 4.3214758  | H  | -0.2810354 | -3.3642085 | 2.0258767  |
| H | 5.3411946  | 1.5720251  | 5.9482010  | H  | 2.5102684  | -0.9354969 | -3.8844096 |
| H | 6.7430687  | -0.4887199 | 5.5981110  | H  | 0.9589209  | -4.3382565 | -4.4860361 |
| H | 6.2868417  | -1.9809447 | 3.6432163  | H  | 0.1158156  | -5.1086058 | 1.9688045  |
| C | -1.9881763 | 3.7711042  | 0.5671059  | H  | 3.0337561  | -6.8643693 | -2.5165539 |
| C | -1.4731176 | 3.2203000  | 1.7801458  | H  | 3.9754779  | -0.4287147 | -1.2100629 |
| C | -3.3601091 | 3.6289731  | 0.2951269  | H  | 2.1043439  | -2.8041650 | 2.5082046  |
| C | -2.3424982 | 2.5415313  | 2.6749513  | H  | 2.6400206  | -3.2098487 | -3.3601004 |
| C | -3.7122219 | 2.4508066  | 2.3615188  | Zn | -2.2979252 | 0.2714403  | -1.4955721 |
| C | -4.2501880 | 2.9958058  | 1.1841924  | Br | -3.0619992 | 1.1661562  | -3.4903286 |
| C | -1.8542740 | 1.9583330  | 3.9996295  | Zn | -1.6949157 | -2.2231458 | -0.3855101 |
| H | -4.3815687 | 1.9465310  | 3.0739415  | Br | -2.0974056 | -4.5170614 | -0.5463405 |
| C | -2.2095627 | 0.4682757  | 4.1475843  | H  | -3.7632437 | 4.0391701  | -0.6450349 |
| H | -3.3068675 | 0.3124789  | 4.2088199  | C  | -0.0702700 | 0.0501815  | -6.0811456 |
| H | -1.7662198 | 0.0527272  | 5.0758783  | C  | -0.3223979 | -0.4315540 | -4.7943865 |
| H | -1.8228177 | -0.1205409 | 3.2927571  | C  | -0.7066669 | -1.7857768 | -4.6169031 |
| C | -2.3813526 | 2.7870836  | 5.1865606  | C  | -0.8425245 | -2.6399736 | -5.7410642 |
| H | -0.7485978 | 2.0368757  | 4.0201743  | C  | -0.5933999 | -2.1478179 | -7.0243748 |
| H | -3.4897699 | 2.7569947  | 5.2384774  | C  | -0.2050578 | -0.8041237 | -7.1909939 |
| H | -2.0800138 | 3.8505273  | 5.0984359  | H  | 0.2254284  | 1.0998827  | -6.2233666 |
| H | -1.9877326 | 2.3955669  | 6.1476276  | H  | -0.9794661 | -2.3109654 | -3.2965485 |
| C | -5.7422459 | 2.9927361  | 0.8764934  | C  | -1.1493512 | -3.6872969 | -5.5930816 |
| C | -6.5375773 | 1.9195216  | 1.6268348  | H  | -0.6999889 | -2.8048107 | -7.9001304 |
| H | -7.5821811 | 1.8930231  | 1.2580582  | H  | -0.0059487 | -0.4179085 | -8.2027202 |
| H | -6.5763560 | 2.1162670  | 2.7194530  | O  | -0.9806587 | -1.6016056 | -2.2617202 |
| H | -6.1070150 | 0.9115967  | 1.4663793  | H  | -0.2259554 | 0.2182985  | -3.9149524 |
| C | -6.3335820 | 4.3941249  | 1.1333354  | H  | -1.2130819 | -3.3994566 | -3.1911748 |
| H | -5.8394616 | 2.7698316  | -0.2059789 | C  | -4.8480712 | -2.5236640 | -2.0202253 |
| H | -7.4062503 | 4.4266779  | 0.8508150  | C  | -4.6428632 | -1.3853973 | -1.3122770 |
| H | -5.8032558 | 5.1743733  | 0.5510329  | C  | -5.7313228 | -0.4272705 | -1.6898539 |
| H | -6.2532986 | 4.6661308  | 2.2072102  | O  | -6.5404676 | -1.0301521 | -2.6207145 |
| C | -1.1169747 | 4.5430983  | -0.4262916 | C  | -6.0533496 | -2.3444170 | -2.8902536 |
| C | -1.2422822 | 4.0392923  | -1.8718798 | O  | -5.9353934 | 0.6894484  | -1.2650696 |
| H | -0.5724803 | 4.6211597  | -2.5384185 | C  | -3.5889528 | -0.9718088 | -0.3497546 |
| H | -2.2718464 | 4.1378522  | -2.2713909 | H  | -5.8091742 | -2.4230597 | -3.9751302 |
| H | -0.9591749 | 2.9729222  | -1.9464438 | H  | -6.8613710 | -3.0817778 | -2.6787545 |
| C | -1.4202313 | 6.0522154  | -0.3398384 | H  | -3.5341331 | -1.6808450 | 0.5134294  |
| H | -0.0584184 | 4.3998210  | -0.1322035 | H  | -3.8963600 | -0.0287320 | 0.1644181  |
| H | -0.7473916 | 6.6291845  | -1.0078632 | H  | -4.2466191 | -3.4440335 | -1.9823652 |
| H | -1.2958323 | 6.4401338  | 0.6917066  |    |            |            |            |
| H | -2.4657394 | 6.2648747  | -0.6463915 |    |            |            |            |
| H | 0.1869204  | -5.6645304 | -2.4459182 |    |            |            |            |
| H | 4.8213556  | -2.2324079 | -3.5697190 |    |            |            |            |
| H | 3.9131587  | -4.5540214 | 2.3220924  |    |            |            |            |
| C | 1.2736322  | -5.5660193 | -2.6779317 |    |            |            |            |
| H | 3.3241769  | 0.5761334  | -3.3833538 |    |            |            |            |

TS4; COSMO

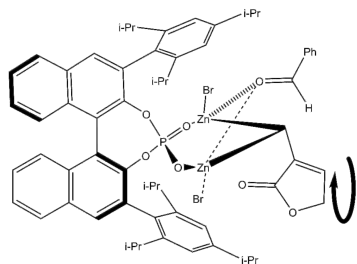

Energy (Hartree) = -11970.02529589

|   |            |            |            |
|---|------------|------------|------------|
| C | 0.8628174  | 2.1043847  | 2.0156506  |
| C | 2.2614715  | 2.1002900  | 2.0264133  |
| C | 2.9392743  | 3.3765883  | 2.0133316  |
| C | 4.3515773  | 3.5085733  | 1.8507741  |
| C | 2.1539002  | 4.5825097  | 2.1334118  |
| C | 2.8158706  | 5.8468623  | 2.1757793  |
| C | 0.7322045  | 4.5016884  | 2.1188907  |
| H | 0.1477292  | 5.4342705  | 2.1372727  |
| C | 0.0658857  | 3.2889002  | 1.9823709  |
| C | 3.3480469  | -1.3946018 | 0.8537255  |
| C | 4.4528697  | -1.6213676 | 1.6673802  |
| H | 5.0269172  | -2.5523416 | 1.5438482  |
| C | 4.8162734  | -0.7245708 | 2.7114605  |
| C | 5.8887480  | -1.0287002 | 3.6037493  |
| C | 4.0496612  | 0.4816186  | 2.9129632  |
| C | 4.3485969  | 1.2872512  | 4.0532995  |
| C | 2.9964923  | 0.8059447  | 1.9796965  |
| C | 2.6614603  | -0.1525073 | 1.0138127  |
| O | 0.1846827  | 0.8829894  | 2.0451512  |
| O | 1.6236734  | 0.1082174  | 0.1157237  |
| P | 0.0776205  | 0.0333139  | 0.6525797  |
| O | -0.7642727 | 0.7421326  | -0.4219963 |
| O | -0.3620811 | -1.3837369 | 1.0652901  |
| C | 4.1947760  | 5.9348669  | 2.0590543  |
| C | 4.9634278  | 4.7547126  | 1.8745410  |
| H | 2.2031334  | 6.7559641  | 2.2812190  |
| H | 4.6921238  | 6.9163545  | 2.0865687  |
| H | 4.9608351  | 2.6078077  | 1.6967739  |
| H | 6.0538627  | 4.8272028  | 1.7428656  |
| C | 5.3840260  | 0.9526697  | 4.9153619  |
| C | 6.1750135  | -0.2042680 | 4.6813408  |
| H | 3.7397410  | 2.1797643  | 4.2526505  |
| H | 5.5888213  | 1.5869207  | 5.7913151  |
| H | 6.9992467  | -0.4539785 | 5.3666891  |
| H | 6.4721776  | -1.9463454 | 3.4292801  |
| C | -1.8028336 | 3.6637466  | 0.3489866  |
| C | -1.3872207 | 3.2108970  | 1.6379159  |
| C | -3.1607693 | 3.5598300  | 0.0044944  |
| C | -2.3380237 | 2.6416393  | 2.5232251  |
| C | -3.6908090 | 2.5847388  | 2.1331808  |
| C | -4.1381320 | 3.0492292  | 0.8825825  |
| C | -1.9517051 | 2.1324055  | 3.9101001  |
| H | -4.4203088 | 2.1714140  | 2.8437892  |
| C | -2.3479011 | 0.6585550  | 4.1131196  |
| H | -3.4492423 | 0.5231460  | 4.0816422  |
| H | -1.9978509 | 0.2926697  | 5.1003943  |
| H | -1.8976734 | 0.0127749  | 3.3333531  |
| C | -2.5397196 | 3.0323241  | 5.0132028  |
| H | -0.8477207 | 2.1928952  | 3.9974089  |
| H | -3.6496051 | 3.0196329  | 4.9956321  |
| H | -2.2146444 | 4.0851068  | 4.8873549  |
| H | -2.2146509 | 2.6889863  | 6.0173067  |
| C | -5.6083474 | 3.0061736  | 0.4672997  |
| C | -6.5633808 | 2.6828921  | 1.6221139  |
| H | -7.6071036 | 2.6501264  | 1.2514213  |
| H | -6.5066448 | 3.4507828  | 2.4230459  |

|    |            |            |            |
|----|------------|------------|------------|
| H  | -6.3544052 | 1.6897616  | 2.0614844  |
| C  | -6.0485374 | 4.2972243  | -0.2479030 |
| H  | -5.6939823 | 2.1718092  | -0.2656779 |
| H  | -7.1150866 | 4.2261111  | -0.5435787 |
| H  | -5.4678487 | 4.4917239  | -1.1707447 |
| H  | -5.9365964 | 5.1803182  | 0.4166568  |
| C  | -0.8399277 | 4.2755986  | -0.6726461 |
| C  | -0.9051044 | 3.5981499  | -2.0532615 |
| H  | -0.1710662 | 4.0675970  | -2.7408388 |
| H  | -1.9067385 | 3.6850316  | -2.5210895 |
| H  | -0.6667622 | 2.5211812  | -1.9687077 |
| C  | -1.0751197 | 5.7939468  | -0.7927696 |
| H  | 0.1925211  | 4.1292366  | -0.2983876 |
| H  | -0.3408420 | 6.2538866  | -1.4864621 |
| H  | -0.9842124 | 6.3017824  | 0.1888924  |
| H  | -2.0919021 | 6.0090582  | -1.1833369 |
| H  | 0.2062923  | -5.7466609 | -2.3685005 |
| H  | 4.5622676  | -2.0576484 | -3.7357075 |
| H  | 4.2247572  | -4.7253783 | 2.0571975  |
| C  | 1.2597960  | -5.5795774 | -2.6945107 |
| H  | 2.9226242  | 0.6652736  | -3.4219294 |
| H  | 0.7608660  | -6.0728386 | -4.7621624 |
| H  | 0.7800270  | -4.4094217 | 3.5667235  |
| C  | 1.7936568  | -4.4527364 | -1.8125558 |
| C  | 4.7683460  | -1.3695869 | -2.8890160 |
| C  | 1.2474213  | -5.2557942 | -4.1923862 |
| H  | 2.2772759  | -5.1415080 | -4.5915910 |
| C  | 2.3509455  | -3.2688877 | -2.3238820 |
| C  | 3.1931482  | -4.9883596 | 2.3678303  |
| H  | 2.0135946  | -7.1877171 | -1.3784400 |
| C  | 1.7413858  | -4.5942012 | -0.4125332 |
| C  | 2.0321911  | -6.8909605 | -2.4454695 |
| H  | 1.5958303  | -7.7233913 | -3.0351540 |
| H  | 1.2780486  | -5.4988252 | 0.0099026  |
| C  | 2.4755150  | -0.2697875 | -3.0256734 |
| H  | 5.5034486  | -1.8670685 | -2.2241933 |
| H  | 5.2431517  | -0.4572136 | -3.3058563 |
| C  | 2.8588849  | -2.2548022 | -1.4858597 |
| C  | 0.7683839  | -4.2522100 | 2.4683299  |
| C  | 2.2451443  | -3.6245299 | 0.4687304  |
| H  | 3.1951492  | -5.1459483 | 3.4663813  |
| H  | 2.9398818  | -5.9568937 | 1.8875502  |
| C  | 3.4781478  | -1.0142035 | -2.1267418 |
| C  | 2.8217435  | -2.4386774 | -0.0794286 |
| C  | 2.1800434  | -3.8956511 | 1.9736688  |
| H  | 1.5641718  | 0.0012406  | -2.4584233 |
| H  | 0.0565555  | -3.4357288 | 2.2445349  |
| H  | 2.1692364  | -0.8844249 | -3.8980101 |
| H  | 0.7036514  | -4.3172285 | -4.4159961 |
| H  | 0.3781454  | -5.1794662 | 2.0019433  |
| H  | 3.0955986  | -6.7791354 | -2.7448466 |
| H  | 3.7667224  | -0.3202913 | -1.3114346 |
| H  | 2.4738636  | -2.9650133 | 2.4982470  |
| H  | 2.4092867  | -3.1207216 | -3.4122172 |
| Zn | -2.5712076 | 0.1079085  | -0.9363941 |
| Br | -3.7935207 | 1.0103571  | -2.6934769 |
| Zn | -1.6933634 | -2.3771502 | -0.0135803 |
| Br | -1.9248356 | -4.6884148 | -0.2655511 |
| H  | -3.4701767 | 3.8979801  | -0.9944490 |
| C  | -0.6937579 | 0.4843525  | -5.5748460 |
| C  | -0.8540933 | -0.1556619 | -4.3448358 |
| C  | -1.0139564 | -1.5655071 | -4.3022665 |
| C  | -1.0192230 | -2.3175608 | -5.5044586 |
| C  | -0.8610847 | -1.6679595 | -6.7320971 |
| C  | -0.6963671 | -0.2696673 | -6.7646634 |
| H  | -0.5697116 | 1.5767212  | -5.6113164 |
| C  | -1.1722925 | -2.2483488 | -3.0353738 |
| H  | -1.1556017 | -3.4093531 | -5.4636014 |
| H  | -0.8663380 | -2.2454845 | -7.6681948 |
| H  | -0.5688885 | 0.2398967  | -7.7322852 |
| O  | -1.2690569 | -1.6398127 | -1.9441357 |

|   |            |            |            |
|---|------------|------------|------------|
| H | -0.8539897 | 0.4141515  | -3.4060459 |
| H | -1.2152052 | -3.3650054 | -3.0267532 |
| C | -4.8835119 | -2.7730168 | -1.3537480 |
| C | -4.7525667 | -1.7472400 | -0.4771696 |
| C | -6.0684540 | -1.0416397 | -0.4291486 |
| O | -6.9321679 | -1.6603616 | -1.2971883 |
| C | -6.2648838 | -2.7595081 | -1.9241081 |
| O | -6.3975983 | -0.0892143 | 0.2503676  |
| C | -3.6001505 | -1.2593035 | 0.3319912  |
| H | -6.2630269 | -2.6002600 | -3.0266658 |
| H | -6.8350953 | -3.6941431 | -1.7222182 |
| H | -3.3924645 | -1.9564753 | 1.1834518  |
| H | -3.9141033 | -0.3515815 | 0.9040808  |
| H | -4.1192474 | -3.5152500 | -1.6257463 |

### TS4

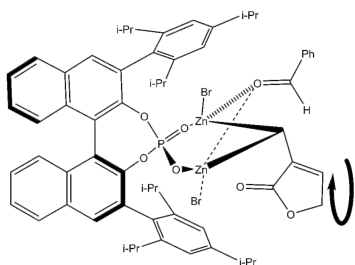

Energy (Hartree) = -11970.01243923  
number of imaginary frequencies: 1

|   |            |            |            |
|---|------------|------------|------------|
| C | 0.8631228  | 2.1011480  | 2.0175275  |
| C | 2.2618453  | 2.0984063  | 2.0292893  |
| C | 2.9387212  | 3.3750244  | 2.0154954  |
| C | 4.3510272  | 3.5078551  | 1.8558118  |
| C | 2.1524020  | 4.5803972  | 2.1324263  |
| C | 2.8138809  | 5.8445110  | 2.1742400  |
| C | 0.7310932  | 4.4979402  | 2.1158008  |
| H | 0.1450859  | 5.4296024  | 2.1308683  |
| C | 0.0651664  | 3.2849822  | 1.9808078  |
| C | 3.3496010  | -1.3954848 | 0.8558746  |
| C | 4.4539229  | -1.6223418 | 1.6697836  |
| H | 5.0268774  | -2.5539341 | 1.5459272  |
| C | 4.8174448  | -0.7260977 | 2.7139859  |
| C | 5.8894751  | -1.0294203 | 3.6063637  |
| C | 4.0508021  | 0.4798810  | 2.9154772  |
| C | 4.3498979  | 1.2855189  | 4.0554180  |
| C | 2.9977257  | 0.8045997  | 1.9825568  |
| C | 2.6630569  | -0.1533624 | 1.0160949  |
| O | 0.1863613  | 0.8796831  | 2.0475206  |
| O | 1.6260875  | 0.1069962  | 0.1178732  |
| P | 0.0800580  | 0.0308081  | 0.6552307  |
| O | -0.7635358 | 0.7390232  | -0.4181856 |
| O | -0.3570186 | -1.3879880 | 1.0650006  |
| C | 4.1924430  | 5.9335182  | 2.0604181  |
| C | 4.9618624  | 4.7540409  | 1.8793102  |
| H | 2.2002643  | 6.7533197  | 2.2769392  |
| H | 4.6889009  | 6.9154130  | 2.0876620  |
| H | 4.9605740  | 2.6068979  | 1.7046843  |
| H | 6.0525268  | 4.8268711  | 1.7501299  |
| C | 5.3851608  | 0.9512835  | 4.9171149  |
| C | 6.1758664  | -0.2052311 | 4.6834314  |
| H | 3.7408226  | 2.1780172  | 4.2536173  |
| H | 5.5899597  | 1.5858180  | 5.7927894  |
| H | 7.0000658  | -0.4549976 | 5.3687218  |
| H | 6.4727177  | -1.9472278 | 3.4321618  |
| C | -1.7996538 | 3.6549968  | 0.3419713  |
| C | -1.3869862 | 3.2058181  | 1.6329915  |

|   |            |            |            |
|---|------------|------------|------------|
| C | -3.1565048 | 3.5493958  | -0.0054918 |
| C | -2.3398082 | 2.6386060  | 2.5171056  |
| C | -3.6914335 | 2.5810712  | 2.1241086  |
| C | -4.1363803 | 3.0421354  | 0.8715843  |
| C | -1.9564579 | 2.1329548  | 3.9061336  |
| H | -4.4232461 | 2.1707729  | 2.8339793  |
| C | -2.3524712 | 0.6596202  | 4.1123745  |
| H | -3.4536753 | 0.5236124  | 4.0792164  |
| H | -2.0043774 | 0.2959540  | 5.1010702  |
| H | -1.8998519 | 0.0118615  | 3.3357923  |
| C | -2.5466908 | 3.0361276  | 5.0052351  |
| H | -0.8525852 | 2.1934668  | 3.9954925  |
| H | -3.6563894 | 3.0240596  | 4.9851636  |
| H | -2.2217506 | 4.0883938  | 4.8764998  |
| H | -2.2242078 | 2.6963681  | 6.0113823  |
| C | -5.6063591 | 3.0021142  | 0.4553003  |
| C | -6.5629832 | 2.6851855  | 1.6104307  |
| H | -7.6061649 | 2.6539660  | 1.2390070  |
| H | -6.5042934 | 3.4552801  | 2.4091273  |
| H | -6.3592815 | 1.6919590  | 2.0515084  |
| C | -6.0414204 | 4.2934132  | -0.2623273 |
| H | -5.6955267 | 2.1667949  | -0.2761473 |
| H | -7.1078023 | 4.2251006  | -0.5586078 |
| H | -5.4601898 | 4.4842434  | -1.1855314 |
| H | -5.9269918 | 5.1773317  | 0.4004978  |
| C | -0.8346166 | 4.2654712  | -0.6786820 |
| C | -0.8948284 | 3.5847913  | -2.0579067 |
| H | -0.1590866 | 4.0535439  | -2.7442787 |
| H | -1.8950098 | 3.6684931  | -2.5293461 |
| H | -0.6546132 | 2.5086125  | -1.9691970 |
| C | -1.0718047 | 5.7830604  | -0.8031260 |
| H | 0.1971613  | 4.1215400  | -0.3015961 |
| H | -0.3365721 | 6.2432322  | -1.4956509 |
| H | -0.9850777 | 6.2932673  | 0.1775432  |
| H | -2.0878698 | 5.9959921  | -1.1962562 |
| H | 0.2046112  | -5.7425030 | -2.3678180 |
| H | 4.5642622  | -2.0549535 | -3.7331306 |
| H | 4.2242360  | -4.7308754 | 2.0538656  |
| C | 1.2582325  | -5.5764035 | -2.6941646 |
| H | 2.9247001  | 0.6693891  | -3.4157664 |
| H | 0.7598504  | -6.0691428 | -4.7626726 |
| H | 0.7806764  | -4.4123556 | 3.5668293  |
| C | 1.7932835  | -4.4501487 | -1.8123208 |
| C | 4.7697991  | -1.3676400 | -2.8858135 |
| C | 1.2464078  | -5.2525279 | -4.1920591 |
| H | 2.2763273  | -5.1392055 | -4.5911954 |
| C | 2.3516008  | -3.2666553 | -2.3226821 |
| C | 3.1925140  | -4.9926102 | 2.3649321  |
| H | 2.0112939  | -7.1850392 | -1.3793981 |
| C | 1.7406413  | -4.5925266 | -0.4128011 |
| C | 2.0295931  | -6.8883977 | -2.4462038 |
| H | 1.5927948  | -7.7209156 | -3.0354528 |
| H | 1.2748140  | -5.4961355 | 0.0088646  |
| C | 2.4772722  | -0.2661144 | -3.0210431 |
| H | 5.5040375  | -1.8665512 | -2.2214792 |
| H | 5.2456821  | -0.4554249 | -3.3017011 |
| C | 2.8601218  | -2.2537866 | -1.4839252 |
| C | 0.7687065  | -4.2537399 | 2.4687945  |
| C | 2.2455581  | -3.6245942 | 0.4693061  |
| H | 3.1953020  | -5.1527629 | 3.4630201  |
| H | 2.9383084  | -5.9598818 | 1.8829320  |
| C | 3.4796242  | -1.0126591 | -2.1235680 |
| C | 2.8230815  | -2.4388895 | -0.0778305 |
| C | 2.1804594  | -3.8979041 | 1.9738094  |
| H | 1.5667684  | 0.0052748  | -2.4526896 |
| H | 0.0580368  | -3.4357941 | 2.2477970  |
| H | 2.1705364  | -0.8787506 | -3.8947768 |
| H | 0.7043094  | -4.3128257 | -4.4157014 |
| H | 0.3757460  | -5.1794911 | 2.0018995  |
| H | 3.0930410  | -6.7773488 | -2.7450514 |
| H | 3.7681377  | -0.3199302 | -1.3073001 |

|    |            |            |            |
|----|------------|------------|------------|
| H  | 2.4758388  | -2.9685823 | 2.4998125  |
| H  | 2.4113272  | -3.1179368 | -3.4109066 |
| Zn | -2.5706945 | 0.1058690  | -0.9336122 |
| Br | -3.7837849 | 0.9981234  | -2.6988000 |
| Zn | -1.6856280 | -2.3791379 | -0.0179661 |
| Br | -1.9130725 | -4.6858352 | -0.2911169 |
| H  | -3.4637013 | 3.8833964  | -1.0064588 |
| C  | -0.7172660 | 0.5033728  | -5.5704553 |
| C  | -0.8647624 | -0.1423514 | -4.3414682 |
| C  | -1.0097199 | -1.5533170 | -4.3032214 |
| C  | -1.0121583 | -2.3006245 | -5.5076918 |
| C  | -0.8667298 | -1.6456427 | -6.7337242 |
| C  | -0.7173240 | -0.2456961 | -6.7622453 |
| H  | -0.6067930 | 1.5972777  | -5.6018330 |
| C  | -1.1602476 | -2.2398445 | -3.0356886 |
| H  | -1.1347368 | -3.3942493 | -5.4693558 |
| H  | -0.8698388 | -2.2200511 | -7.6718223 |
| H  | -0.6002187 | 0.2684257  | -7.7288612 |
| O  | -1.2580677 | -1.6325299 | -1.9460044 |
| H  | -0.8663011 | 0.4243850  | -3.4009663 |
| H  | -1.1968074 | -3.3573335 | -3.0259503 |
| C  | -4.8896042 | -2.7779168 | -1.3380918 |
| C  | -4.7503474 | -1.7530759 | -0.4630577 |
| C  | -6.0655982 | -1.0426789 | -0.4023813 |
| O  | -6.9376254 | -1.6607835 | -1.2644759 |
| C  | -6.2777080 | -2.7576356 | -1.8961718 |
| O  | -6.3813578 | -0.0917206 | 0.2812389  |
| C  | -3.5929231 | -1.2657169 | 0.3381347  |
| H  | -6.2838447 | -2.5962114 | -2.9990183 |
| H  | -6.8484268 | -3.6924268 | -1.6927350 |
| H  | -3.3808928 | -1.9634922 | 1.1886092  |
| H  | -3.9047962 | -0.3577067 | 0.9114002  |
| H  | -4.1290549 | -3.5233741 | -1.6126267 |

## TS5; COSMO

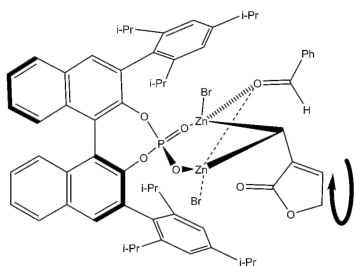

Energy (Hartree) = -11970.02872684

|   |           |            |            |
|---|-----------|------------|------------|
| C | 0.9846992 | 2.1011696  | 1.7852931  |
| C | 2.3848182 | 2.1024323  | 1.7981374  |
| C | 3.0538162 | 3.3821852  | 1.8137135  |
| C | 4.4656124 | 3.5223522  | 1.6546286  |
| C | 2.2629612 | 4.5817777  | 1.9618369  |
| C | 2.9203279 | 5.8474465  | 2.0269378  |
| C | 0.8407341 | 4.4952747  | 1.9647761  |
| H | 0.2536515 | 5.4243902  | 2.0242025  |
| C | 0.1803785 | 3.2824573  | 1.8082142  |
| C | 3.4037536 | -1.4373070 | 0.6860583  |
| C | 4.4834088 | -1.6887921 | 1.5244430  |
| H | 5.0143786 | -2.6492053 | 1.4436856  |
| C | 4.8718921 | -0.7746828 | 2.5455733  |
| C | 5.9207537 | -1.0983035 | 3.4585844  |
| C | 4.1469597 | 0.4632162  | 2.7122436  |
| C | 4.4566964 | 1.2765735  | 3.8441082  |
| C | 3.1209646 | 0.8061528  | 1.7548131  |
| C | 2.7850018 | -0.1534430 | 0.7916837  |
| O | 0.3104604 | 0.8825859  | 1.7624155  |
| O | 1.7941310 | 0.1427285  | -0.1466430 |
| P | 0.2345782 | 0.0646866  | 0.3411061  |

|   |            |            |            |
|---|------------|------------|------------|
| O | -0.5675374 | 0.8210377  | -0.7339557 |
| O | -0.2190923 | -1.3529040 | 0.7153947  |
| C | 4.2986328  | 5.9433019  | 1.9083234  |
| C | 5.0724000  | 4.7701602  | 1.7014734  |
| H | 2.3048321  | 6.7520301  | 2.1534070  |
| H | 4.7918344  | 6.9262023  | 1.9536794  |
| H | 5.0765975  | 2.6252256  | 1.4851734  |
| H | 6.1625224  | 4.8499327  | 1.5714581  |
| C | 5.4685174  | 0.9228805  | 4.7265370  |
| C | 6.2224345  | -0.2639617 | 4.5243421  |
| H | 3.8759102  | 2.1919664  | 4.0210582  |
| H | 5.6824815  | 1.5656511  | 5.5940617  |
| H | 7.0282839  | -0.5294455 | 5.2254302  |
| H | 6.4724051  | -2.0399604 | 3.3105848  |
| C | -1.7603033 | 3.6028044  | 0.2388183  |
| C | -1.2857266 | 3.1804163  | 1.5178594  |
| C | -3.1153357 | 3.3996219  | -0.0806623 |
| C | -2.1871667 | 2.5915292  | 2.4419451  |
| C | -3.5441342 | 2.4496089  | 2.0845184  |
| C | -4.0362651 | 2.8269879  | 0.8215283  |
| C | -1.7447314 | 2.1202022  | 3.8254642  |
| H | -4.2269243 | 2.0001964  | 2.8189446  |
| C | -2.0147024 | 0.6185280  | 4.0405155  |
| H | -3.0921291 | 0.3665102  | 3.9553272  |
| H | -1.6772729 | 0.3066694  | 5.0503637  |
| H | -1.4613523 | 0.0098798  | 3.2989977  |
| C | -2.3956324 | 2.9753285  | 4.9291895  |
| H | -0.6482414 | 2.2753644  | 3.8980924  |
| H | -3.4992689 | 2.8569243  | 4.9342622  |
| H | -2.1727753 | 4.0526880  | 4.7892680  |
| H | -2.0227767 | 2.6726233  | 5.9294210  |
| C | -5.4830745 | 2.5703997  | 0.3929510  |
| C | -6.4044704 | 2.1410535  | 1.5416855  |
| H | -7.4177198 | 1.9110828  | 1.1554939  |
| H | -6.5080124 | 2.9502676  | 2.2953078  |
| H | -6.0418192 | 1.2394704  | 2.0711491  |
| C | -6.0913657 | 3.7633293  | -0.3665002 |
| H | -5.4283094 | 1.7234275  | -0.3328309 |
| H | -7.1324313 | 3.5340781  | -0.6720404 |
| H | -5.5283708 | 4.0080213  | -1.2880925 |
| H | -6.1147143 | 4.6702709  | 0.2736395  |
| C | -0.8630913 | 4.3006006  | -0.7858750 |
| C | -0.9690756 | 3.7240203  | -2.2076582 |
| H | -0.2691775 | 4.2581732  | -2.8828817 |
| H | -1.9865695 | 3.8285394  | -2.6362000 |
| H | -0.7068939 | 2.6496126  | -2.2146171 |
| C | -1.1512333 | 5.8154721  | -0.7882981 |
| H | 0.1880880  | 4.1606174  | -0.4646195 |
| H | -0.4626584 | 6.3467954  | -1.4776384 |
| H | -1.0358364 | 6.2586979  | 0.2214177  |
| H | -2.1906724 | 6.0185755  | -1.1214547 |
| H | -0.1917750 | -5.5383609 | -2.3705585 |
| H | 4.6179964  | -2.4691763 | -3.8404555 |
| H | 4.0202006  | -4.5744871 | 2.0836173  |
| C | 0.8769814  | -5.5240972 | -2.6902738 |
| H | 3.2750707  | 0.4223244  | -3.6912064 |
| H | 0.3332938  | -6.0465612 | -4.7396335 |
| H | 0.5456466  | -4.1336019 | 3.5043473  |
| C | 1.5468501  | -4.4341803 | -1.8555296 |
| C | 4.8857118  | -1.7639527 | -3.0257283 |
| C | 0.9210300  | -5.2754400 | -4.2019240 |
| H | 1.9605199  | -5.3224253 | -4.5895092 |
| C | 2.2567501  | -3.3589605 | -2.4142209 |
| C | 2.9806198  | -4.8164829 | 2.3817797  |
| H | 1.3984767  | -7.1506463 | -1.2882144 |
| C | 1.4643308  | -4.4992797 | -0.4508802 |
| H | 1.4679245  | -6.9113220 | -2.3673745 |
| H | 0.9325076  | -7.7073708 | -2.9248559 |
| H | 0.8814405  | -5.3134950 | 0.0053760  |
| C | 2.7240771  | -0.4370491 | -3.2559746 |
| H | 5.5559340  | -2.3016108 | -2.3246445 |

|    |            |            |            |
|----|------------|------------|------------|
| H  | 5.4594917  | -0.9290643 | -3.4790752 |
| C  | 2.8756578  | -2.3737527 | -1.6170668 |
| C  | 0.5609950  | -4.0871080 | 2.3961035  |
| C  | 2.0814854  | -3.5607648 | 0.3904159  |
| H  | 2.9555986  | -4.9176521 | 3.4867074  |
| H  | 2.7328492  | -5.8061574 | 1.9434805  |
| C  | 3.6307043  | -1.2382116 | -2.3045557 |
| C  | 2.8047803  | -2.4818974 | -0.2052455 |
| C  | 1.9777941  | -3.7457770 | 1.9059230  |
| H  | 1.8414084  | -0.0408496 | -2.7176770 |
| H  | -0.1668915 | -3.3200920 | 2.0740616  |
| H  | 2.3612367  | -1.0590143 | -4.1009426 |
| H  | 0.5131173  | -4.2837328 | -4.4791418 |
| H  | 0.2071023  | -5.0691589 | 2.0214983  |
| H  | 2.5400881  | -6.9539003 | -2.6532015 |
| H  | 3.9788780  | -0.5399437 | -1.5160754 |
| H  | 2.2589072  | -2.7846059 | 2.3819305  |
| H  | 2.3411582  | -3.2714556 | -3.5073595 |
| Zn | -2.4521991 | 0.2942546  | -1.1108754 |
| Br | -3.7124996 | 1.0352429  | -2.9223324 |
| Zn | -1.8431693 | -2.1914902 | -0.0933239 |
| Br | -2.4351858 | -4.4246718 | -0.2930126 |
| H  | -3.4641761 | 3.7001973  | -1.0782628 |
| C  | -0.4427236 | 0.3705258  | -5.7244070 |
| C  | -0.7164986 | -0.2215494 | -4.4903408 |
| C  | -1.0748635 | -1.5934211 | -4.4343497 |
| C  | -1.1616377 | -2.3562094 | -5.6255454 |
| C  | -0.8908844 | -1.7537859 | -6.8580434 |
| C  | -0.5300103 | -0.3936764 | -6.9047036 |
| H  | -0.1615614 | 1.4328938  | -5.7726771 |
| C  | -1.3570438 | -2.2231370 | -3.1593265 |
| H  | -1.4489825 | -3.4178544 | -5.5728127 |
| H  | -0.9592910 | -2.3392161 | -7.7867642 |
| H  | -0.3130354 | 0.0778393  | -7.8756964 |
| O  | -1.4004044 | -1.5825061 | -2.0862377 |
| H  | -0.6512536 | 0.3525505  | -3.5557029 |
| H  | -1.5491747 | -3.3239141 | -3.1303826 |
| C  | -5.4573934 | -1.4681057 | -0.6406801 |
| C  | -4.6998855 | -1.1624704 | 0.4379104  |
| C  | -5.5512731 | -1.3499076 | 1.6505049  |
| O  | -6.7968403 | -1.7692804 | 1.2473428  |
| C  | -6.8233802 | -1.8662234 | -0.1809387 |
| O  | -5.2666346 | -1.1672081 | 2.8193264  |
| C  | -3.2913971 | -0.6993828 | 0.5686775  |
| H  | -7.6226584 | -1.1987085 | -0.5755298 |
| H  | -7.0852899 | -2.9086964 | -0.4708559 |
| H  | -2.8778014 | -1.1124894 | 1.5227158  |
| H  | -3.2908416 | 0.3725593  | 0.9078485  |
| H  | -5.1532011 | -1.4249233 | -1.6961583 |

|   |            |            |            |
|---|------------|------------|------------|
| C | 0.8398127  | 4.4935910  | 1.9639308  |
| H | 0.2512026  | 5.4216932  | 2.0239106  |
| C | 0.1801970  | 3.2804763  | 1.8081133  |
| C | 3.4035076  | -1.4368095 | 0.6832743  |
| C | 4.4839080  | -1.6877947 | 1.5204653  |
| H | 5.0131841  | -2.6491344 | 1.4398591  |
| C | 4.8750499  | -0.7730283 | 2.5396483  |
| C | 5.9254417  | -1.0951153 | 3.4507843  |
| C | 4.1510067  | 0.4652291  | 2.7061006  |
| C | 4.4637472  | 1.2799242  | 3.8358647  |
| C | 3.1234122  | 0.8076438  | 1.7503576  |
| C | 2.7858676  | -0.1523523 | 0.7881258  |
| O | 0.3132035  | 0.8816152  | 1.7619448  |
| O | 1.7944584  | 0.1429770  | -0.1491374 |
| P | 0.2352774  | 0.0648184  | 0.3405480  |
| O | -0.5683962 | 0.8226123  | -0.7324572 |
| O | -0.2176554 | -1.3532947 | 0.7123573  |
| C | 4.2958024  | 5.9454414  | 1.9030926  |
| C | 5.0701928  | 4.7735405  | 1.6951999  |
| H | 2.3019877  | 6.7518874  | 2.1505771  |
| H | 4.7878800  | 6.9288825  | 1.9479672  |
| H | 5.0759480  | 2.6286473  | 1.4788734  |
| H | 6.1600469  | 4.8543451  | 1.5639562  |
| C | 5.4772904  | 0.9273206  | 4.7161131  |
| C | 6.2300414  | -0.2596616 | 4.5141703  |
| H | 3.8835646  | 2.1956974  | 4.0122306  |
| H | 5.6935055  | 1.5714448  | 5.5820083  |
| H | 7.0374067  | -0.5244760 | 5.2136935  |
| H | 6.4762200  | -2.0373089 | 3.3030520  |
| C | -1.7602293 | 3.5985273  | 0.2385796  |
| C | -1.2857892 | 3.1767083  | 1.5177381  |
| C | -3.1143300 | 3.3924598  | -0.0820785 |
| C | -2.1866935 | 2.5855364  | 2.4408127  |
| C | -3.5429190 | 2.4413327  | 2.0822514  |
| C | -4.0347984 | 2.8182483  | 0.8192611  |
| C | -1.7446265 | 2.1133444  | 3.8241150  |
| H | -4.2253207 | 1.9897223  | 2.8156208  |
| C | -2.0125775 | 0.6109787  | 4.0377050  |
| H | -3.0893365 | 0.3561843  | 3.9523630  |
| H | -1.6750226 | 0.2987171  | 5.0472763  |
| H | -1.4571303 | 0.0038566  | 3.2966867  |
| C | -2.3975648 | 2.9668247  | 4.9278512  |
| H | -0.6483699 | 2.2703116  | 3.8975389  |
| H | -3.5009186 | 2.8471400  | 4.9320137  |
| H | -2.1763596 | 4.0445580  | 4.7890415  |
| H | -2.0255936 | 2.6639586  | 5.9283081  |
| C | -5.4811681 | 2.5601535  | 0.3901699  |
| C | -6.4023747 | 2.1306409  | 1.5391092  |
| H | -7.4157238 | 1.9003992  | 1.1534080  |
| H | -6.5064961 | 2.9403085  | 2.2920860  |
| H | -6.0404863 | 1.2292749  | 2.0692772  |
| C | -6.0898904 | 3.7526103  | -0.3695104 |
| H | -5.4256039 | 1.7132924  | -0.3356906 |
| H | -7.1306916 | 3.5229586  | -0.6755090 |
| H | -5.5271835 | 3.9973631  | -1.2911388 |
| H | -6.1140816 | 4.6595793  | 0.2703816  |
| C | -0.8638373 | 4.2988450  | -0.7852733 |
| C | -0.9662444 | 3.7219207  | -2.2071657 |
| H | -0.2668726 | 4.2579965  | -2.8814994 |
| H | -1.9831880 | 3.8223951  | -2.6377883 |
| H | -0.7004906 | 2.6484749  | -2.2130788 |
| C | -1.1565773 | 5.8127487  | -0.7881172 |
| H | 0.1874295  | 4.1621422  | -0.4628945 |
| H | -0.4690666 | 6.3467332  | -1.4764630 |
| H | -1.0442312 | 6.2562855  | 0.2216983  |
| H | -2.1962157 | 6.0128827  | -1.1219861 |
| H | -0.2058461 | -5.5368710 | -2.3560137 |
| H | 4.6110626  | -2.4838153 | -3.8407780 |
| H | 4.0155623  | -4.5745339 | 2.0845900  |
| C | 0.8625115  | -5.5262852 | -2.6774601 |
| H | 3.2776600  | 0.4136994  | -3.6956439 |

## TS5

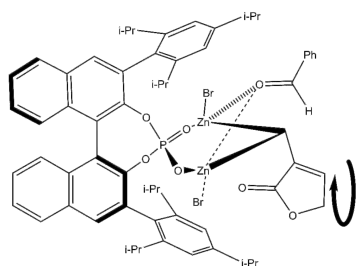

Energy (Hartree) = -11970.01546133  
number of imaginary frequencies: 1

|   |           |           |           |
|---|-----------|-----------|-----------|
| C | 0.9860620 | 2.1001661 | 1.7841519 |
| C | 2.3862634 | 2.1032554 | 1.7947716 |
| C | 3.0535913 | 3.3837193 | 1.8095689 |
| C | 4.4647963 | 3.5254756 | 1.6488507 |
| C | 2.2617110 | 4.5822463 | 1.9590047 |
| C | 2.9182419 | 5.8479310 | 2.0233539 |

|    |            |            |            |
|----|------------|------------|------------|
| H  | 0.3162758  | -6.0554119 | -4.7249025 |
| H  | 0.5453335  | -4.1214404 | 3.5130539  |
| C  | 1.5361278  | -4.4350006 | -1.8477189 |
| C  | 4.8813448  | -1.7776977 | -3.0277997 |
| C  | 0.9058536  | -5.2835068 | -4.1901041 |
| H  | 1.9447867  | -5.3344924 | -4.5785212 |
| C  | 2.2480106  | -3.3632704 | -2.4102332 |
| C  | 2.9760172  | -4.8128349 | 2.3856217  |
| H  | 1.3824372  | -7.1488069 | -1.2710978 |
| C  | 1.4551860  | -4.4962250 | -0.4431682 |
| C  | 1.4508299  | -6.9136209 | -2.3509790 |
| H  | 0.9130513  | -7.7108311 | -2.9045112 |
| H  | 0.8693494  | -5.3066980 | 0.0157594  |
| C  | 2.7242205  | -0.4431291 | -3.2585614 |
| H  | 5.5496467  | -2.3166156 | -2.3261790 |
| H  | 5.4582199  | -0.9460945 | -3.4832372 |
| C  | 2.8704741  | -2.3778522 | -1.6164348 |
| C  | 0.5584986  | -4.0769219 | 2.4048454  |
| C  | 2.0763258  | -3.5578908 | 0.3949082  |
| H  | 2.9535013  | -4.9127801 | 3.4906294  |
| H  | 2.7248823  | -5.8023018 | 1.9491261  |
| C  | 3.6286639  | -1.2462780 | -2.3069735 |
| C  | 2.8013542  | -2.4824508 | -0.2045307 |
| C  | 1.9750516  | -3.7399433 | 1.9109013  |
| H  | 1.8441641  | -0.0424275 | -2.7194277 |
| H  | -0.1681068 | -3.3086139 | 2.0838000  |
| H  | 2.3581160  | -1.0647128 | -4.1025094 |
| H  | 0.5008894  | -4.2914732 | -4.4707573 |
| H  | 0.2002159  | -5.0583207 | 2.0330645  |
| H  | 2.5225133  | -6.9595676 | -2.6375188 |
| H  | 3.9796593  | -0.5478429 | -1.5199101 |
| H  | 2.2598841  | -2.7788995 | 2.3849014  |
| H  | 2.3321444  | -3.2792173 | -3.5037144 |
| Zn | -2.4532641 | 0.2948687  | -1.1092247 |
| Br | -3.7080335 | 1.0305451  | -2.9247917 |
| Zn | -1.8407456 | -2.1928007 | -0.0979039 |
| Br | -2.4229405 | -4.4240453 | -0.3178961 |
| H  | -3.4628687 | 3.6914439  | -1.0802130 |
| C  | -0.4401056 | 0.3978858  | -5.7133462 |
| C  | -0.7139211 | -0.2020497 | -4.4829076 |
| C  | -1.0613321 | -1.5764021 | -4.4349166 |
| C  | -1.1374393 | -2.3334014 | -5.6297986 |
| C  | -0.8667571 | -1.7233910 | -6.8583626 |
| C  | -0.5164191 | -0.3605663 | -6.8971677 |
| H  | -0.1681587 | 1.4628912  | -5.7541426 |
| C  | -1.3440792 | -2.2127672 | -3.1615593 |
| H  | -1.4156357 | -3.3978069 | -5.5828211 |
| H  | -0.9270084 | -2.3049603 | -7.7901267 |
| H  | -0.2994678 | 0.1172558  | -7.8651545 |
| O  | -1.3933144 | -1.5753738 | -2.0891701 |
| H  | -0.6570843 | 0.3681833  | -3.5454401 |
| H  | -1.5309257 | -3.3151015 | -3.1343310 |
| C  | -5.4574278 | -1.4673691 | -0.6423954 |
| C  | -4.6995685 | -1.1656153 | 0.4359105  |
| C  | -5.5497951 | -1.3542129 | 1.6515342  |
| O  | -6.7971690 | -1.7733207 | 1.2466177  |
| C  | -6.8234909 | -1.8666471 | -0.1793162 |
| O  | -5.2620284 | -1.1693847 | 2.8166490  |
| C  | -3.2913702 | -0.7038923 | 0.5677383  |
| H  | -7.6235461 | -1.1982631 | -0.5724489 |
| H  | -7.0856369 | -2.9088722 | -0.4719624 |
| H  | -2.8794903 | -1.1190629 | 1.5220612  |
| H  | -3.2911783 | 0.3671247  | 0.9097819  |
| H  | -5.1540621 | -1.4188124 | -1.6979840 |

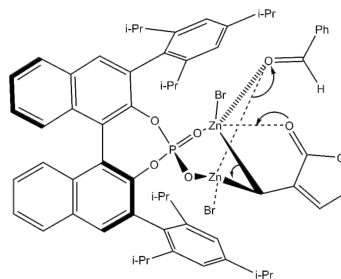

Energy (Hartree) = -11970.02927084

|   |            |            |            |
|---|------------|------------|------------|
| C | 0.7994821  | 2.2072768  | 1.4788122  |
| C | 2.2002079  | 2.2070193  | 1.4991337  |
| C | 2.8717792  | 3.4859043  | 1.4769060  |
| C | 4.2775164  | 3.6169564  | 1.2665561  |
| C | 2.0917243  | 4.6882579  | 1.6425051  |
| C | 2.7542873  | 5.9528315  | 1.6653461  |
| C | 0.6740009  | 4.5981259  | 1.7399694  |
| H | 0.0928780  | 5.5226264  | 1.8801037  |
| C | 0.0017146  | 3.3886578  | 1.6009781  |
| C | 3.3286665  | -1.3964198 | 0.7254415  |
| C | 4.3873160  | -1.5448724 | 1.6115253  |
| H | 4.9521915  | -2.4893847 | 1.6233262  |
| C | 4.7177543  | -0.5333801 | 2.5579656  |
| C | 5.7452350  | -0.7453946 | 3.5262032  |
| C | 3.9554356  | 0.6925712  | 2.5884585  |
| C | 4.2046354  | 1.6062874  | 3.6574986  |
| C | 2.9528993  | 0.9229385  | 1.5695523  |
| C | 2.6618651  | -0.1330250 | 0.6986521  |
| O | 0.1246609  | 0.9927183  | 1.4249086  |
| O | 1.7166724  | 0.0372312  | -0.3072226 |
| P | 0.1152195  | 0.1331114  | 0.0258919  |
| O | -0.4833593 | 0.8801887  | -1.1704499 |
| O | -0.4832703 | -1.2183572 | 0.4611921  |
| C | 4.1270371  | 6.0420055  | 1.4888735  |
| C | 4.8893257  | 4.8632424  | 1.2695495  |
| H | 2.1473026  | 6.8612641  | 1.8050853  |
| H | 4.6241264  | 7.0239841  | 1.4985285  |
| H | 4.8774172  | 2.7133547  | 1.0894937  |
| H | 5.9735410  | 4.9377933  | 1.0947264  |
| C | 5.1960274  | 1.3610312  | 4.5982583  |
| C | 5.9907270  | 0.1864857  | 4.5232180  |
| H | 3.5935562  | 2.5147441  | 3.7425641  |
| H | 5.3602209  | 2.0818882  | 5.4138072  |
| H | 6.7811322  | 0.0077184  | 5.2680602  |
| H | 6.3258470  | -1.6800479 | 3.4769729  |
| C | -2.1901857 | 3.8959092  | 0.4527363  |
| C | -1.4904763 | 3.3027092  | 1.5450033  |
| C | -3.5888103 | 3.7574887  | 0.3929753  |
| C | -2.2143687 | 2.6082758  | 2.5536090  |
| C | -3.6139499 | 2.5028743  | 2.4428189  |
| C | -4.3233430 | 3.0512508  | 1.3628125  |
| C | -1.5322294 | 2.0008402  | 3.7782970  |
| H | -4.1590128 | 1.9506224  | 3.2220875  |
| C | -1.8778264 | 0.5138759  | 3.9710360  |
| H | -2.9550168 | 0.3651756  | 4.1935619  |
| H | -1.3056723 | 0.0921248  | 4.8229353  |
| H | -1.6275388 | -0.0741547 | 3.0659695  |
| C | -1.8534217 | 2.8284798  | 5.0380571  |
| H | -0.4364121 | 2.0659684  | 3.6270905  |
| H | -2.9396918 | 2.8063796  | 5.2673717  |
| H | -1.5596869 | 3.8899612  | 4.9075783  |
| H | -1.3134923 | 2.4273136  | 5.9208436  |
| C | -5.8374964 | 2.9275424  | 1.2187705  |
| C | -6.4476376 | 1.7570820  | 2.0006009  |
| H | -7.5121366 | 1.6193419  | 1.7215387  |
| H | -6.4181059 | 1.9339667  | 3.0961910  |

TS6; COSMO



|    |            |            |            |   |            |            |            |
|----|------------|------------|------------|---|------------|------------|------------|
| H  | -5.9156420 | 0.8064414  | 1.7966803  | H | -0.2193437 | -0.0924269 | -4.0589335 |
| C  | -6.5261023 | 4.2557782  | 1.5905779  | H | -1.2905079 | -3.6200942 | -2.9902030 |
| H  | -6.0308072 | 2.7430633  | 0.1371495  | C | -5.9294708 | -0.4828504 | -0.9711265 |
| H  | -7.6211047 | 4.1998239  | 1.4182268  | C | -4.6822648 | -0.5976695 | -0.4235737 |
| H  | -6.1274204 | 5.1014281  | 0.9949015  | C | -4.6952824 | -1.8629859 | 0.3359001  |
| H  | -6.3594670 | 4.4924138  | 2.6624745  | O | -5.9164660 | -2.4223904 | 0.3329143  |
| C  | -1.4840489 | 4.6676833  | -0.6629255 | C | -6.7763310 | -1.6234976 | -0.5102651 |
| C  | -1.7829653 | 4.0954708  | -2.0566935 | O | -3.7443460 | -2.4014965 | 0.9339572  |
| H  | -1.2493630 | 4.6737976  | -2.8390593 | C | -3.4563280 | 0.1903915  | -0.4498673 |
| H  | -2.8630031 | 4.1213751  | -2.3077918 | H | -7.6584264 | -1.3095871 | 0.0911047  |
| H  | -1.4463012 | 3.0441992  | -2.1323191 | H | -7.1436237 | -2.2824305 | -1.3281399 |
| C  | -1.8198685 | 6.1692217  | -0.5836519 | H | -2.9290435 | 0.0978147  | 0.5209015  |
| H  | -0.3921725 | 4.5650432  | -0.5075775 | H | -3.6772895 | 1.2721764  | -0.5759418 |
| H  | -1.2533600 | 6.7398756  | -1.3484747 | H | -6.2951595 | 0.3219614  | -1.6228225 |
| H  | -1.5738065 | 6.5906179  | 0.4126839  |   |            |            |            |
| H  | -2.9010067 | 6.3494910  | -0.7614058 |   |            |            |            |
| H  | 0.1912493  | -5.8632741 | -2.3291664 |   |            |            |            |
| H  | 4.9489966  | -2.7037352 | -3.6135095 |   |            |            |            |
| H  | 3.8460812  | -4.3512578 | 2.4539131  |   |            |            |            |
| C  | 1.2902810  | -5.8403668 | -2.5180801 |   |            |            |            |
| H  | 3.5275702  | 0.1451778  | -3.7450883 |   |            |            |            |
| H  | 1.0204364  | -6.5691753 | -4.5575244 |   |            |            |            |
| H  | 0.2386474  | -3.8692583 | 3.4723519  |   |            |            |            |
| C  | 1.8233357  | -4.6556751 | -1.7149023 |   |            |            |            |
| C  | 5.1378926  | -1.9439239 | -2.8262669 |   |            |            |            |
| C  | 1.5114690  | -5.7263078 | -4.0303547 |   |            |            |            |
| H  | 2.5917214  | -5.7609801 | -4.2858003 |   |            |            |            |
| C  | 2.5441735  | -3.5977704 | -2.2931826 |   |            |            |            |
| C  | 2.7869018  | -4.5960562 | 2.6692865  |   |            |            |            |
| H  | 1.6731400  | -7.3143889 | -0.9158845 |   |            |            |            |
| C  | 1.5834048  | -4.5990888 | -0.3271344 |   |            |            |            |
| C  | 1.8701973  | -7.1705652 | -1.9964381 |   |            |            |            |
| H  | 1.4270454  | -8.0322416 | -2.5372029 |   |            |            |            |
| H  | 0.9850940  | -5.3965677 | 0.1379108  |   |            |            |            |
| C  | 2.9663489  | -0.6980535 | -3.2915519 |   |            |            |            |
| H  | 5.7689255  | -2.4182557 | -2.0472967 |   |            |            |            |
| H  | 5.7216325  | -1.1207971 | -3.2882715 |   |            |            |            |
| C  | 3.0412608  | -2.5226228 | -1.5285967 |   |            |            |            |
| C  | 0.3663175  | -3.9266558 | 2.3719359  |   |            |            |            |
| C  | 2.0718169  | -3.5624693 | 0.4835305  |   |            |            |            |
| H  | 2.6513628  | -4.5915038 | 3.7708746  |   |            |            |            |
| H  | 2.6043448  | -5.6298520 | 2.3074077  |   |            |            |            |
| C  | 3.8214507  | -1.4129758 | -2.2300276 |   |            |            |            |
| C  | 2.8279756  | -2.5188259 | -0.1278331 |   |            |            |            |
| C  | 1.8199351  | -3.6041649 | 1.9925419  |   |            |            |            |
| H  | 2.0413056  | -0.2898345 | -2.8403060 |   |            |            |            |
| H  | -0.3314158 | -3.2020463 | 1.9124969  |   |            |            |            |
| H  | 2.6762801  | -1.3846409 | -4.1141890 |   |            |            |            |
| H  | 1.1020554  | -4.7849277 | -4.4470177 |   |            |            |            |
| H  | 0.0575343  | -4.9429221 | 2.0537471  |   |            |            |            |
| H  | 2.9703220  | -7.2017327 | -2.1453012 |   |            |            |            |
| H  | 4.0937087  | -0.6580873 | -1.4640702 |   |            |            |            |
| H  | 2.0396202  | -2.5943167 | 2.3952417  |   |            |            |            |
| H  | 2.7371503  | -3.5991752 | -3.3759107 |   |            |            |            |
| Zn | -2.1974474 | 0.3191743  | -2.0625667 |   |            |            |            |
| Br | -2.9795551 | 1.1280092  | -4.1183136 |   |            |            |            |
| Zn | -1.8935698 | -2.3936560 | -0.1822110 |   |            |            |            |
| Br | -2.0475553 | -4.6998949 | -0.6259547 |   |            |            |            |
| H  | -4.1284378 | 4.1942897  | -0.4639244 |   |            |            |            |
| C  | 0.1052585  | -0.5391848 | -6.1580342 |   |            |            |            |
| C  | -0.2802351 | -0.8496297 | -4.8516874 |   |            |            |            |
| C  | -0.7370059 | -2.1569913 | -4.5459033 |   |            |            |            |
| C  | -0.7878991 | -3.1460558 | -5.5628230 |   |            |            |            |
| C  | -0.4092507 | -2.8246532 | -6.8688479 |   |            |            |            |
| C  | 0.0345697  | -1.5209124 | -7.1642409 |   |            |            |            |
| H  | 0.4561014  | 0.4753302  | -6.3970393 |   |            |            |            |
| C  | -1.1360341 | -2.5353146 | -3.2075423 |   |            |            |            |
| H  | -1.1397973 | -4.1594721 | -5.3148785 |   |            |            |            |
| H  | -0.4600162 | -3.5846813 | -7.6623663 |   |            |            |            |
| H  | 0.3353910  | -1.2687037 | -8.1928688 |   |            |            |            |
| O  | -1.3573420 | -1.7275431 | -2.2697986 |   |            |            |            |

### TS6

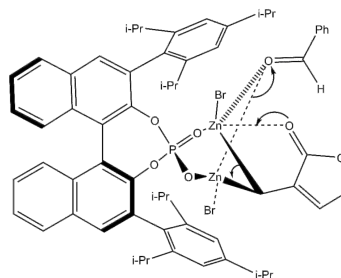

Energy (Hartree) = -11970.01519763  
number of imaginary frequencies: 1

|   |            |            |            |
|---|------------|------------|------------|
| C | 0.8298062  | 2.2377846  | 1.5168008  |
| C | 2.2304950  | 2.2307722  | 1.5333159  |
| C | 2.9071631  | 3.5073473  | 1.5208306  |
| C | 4.3120197  | 3.6346057  | 1.3047901  |
| C | 2.1331751  | 4.7113174  | 1.7001121  |
| C | 2.8019981  | 5.9718099  | 1.7313035  |
| C | 0.7151794  | 4.6271551  | 1.7971688  |
| H | 0.1380497  | 5.5528833  | 1.9461246  |
| C | 0.0374154  | 3.4227997  | 1.6470026  |
| C | 3.3435717  | -1.3731699 | 0.7350395  |
| C | 4.4079689  | -1.5282286 | 1.6125248  |
| H | 4.9677495  | -2.4758486 | 1.6171009  |
| C | 4.7482099  | -0.5224270 | 2.5610805  |
| C | 5.7819807  | -0.7412486 | 3.5202729  |
| C | 3.9899713  | 0.7056751  | 2.6024800  |
| C | 4.2523645  | 1.6143485  | 3.6723995  |
| C | 2.9797025  | 0.9438194  | 1.5925674  |
| C | 2.6791967  | -0.1083201 | 0.7196406  |
| O | 0.1492305  | 1.0279379  | 1.4580874  |
| O | 1.7270936  | 0.0654749  | -0.2771286 |
| P | 0.1267544  | 0.1695475  | 0.0588571  |
| O | -0.4627838 | 0.9188273  | -1.1389873 |
| O | -0.4847032 | -1.1753663 | 0.4996122  |
| C | 4.1737466  | 6.0571018  | 1.5497380  |
| C | 4.9292797  | 4.8776614  | 1.3160388  |
| H | 2.1992864  | 6.8815634  | 1.8805537  |
| H | 4.6747128  | 7.0369500  | 1.5656261  |
| H | 4.9063050  | 2.7297254  | 1.1164209  |
| H | 6.0128219  | 4.9487860  | 1.1361801  |
| C | 5.2500826  | 1.3619549  | 4.6037990  |
| C | 6.0390595  | 0.1851269  | 4.5185866  |
| H | 3.6453786  | 2.5245762  | 3.7650938  |
| H | 5.4240442  | 2.0797017  | 5.4199684  |
| H | 6.8348692  | 0.0005287  | 5.2561188  |
| H | 6.3587023  | -1.6777859 | 3.4626153  |
| C | -2.1535082 | 3.9218333  | 0.4940749  |
| C | -1.4544341 | 3.3345480  | 1.5894263  |

|   |            |            |            |    |            |            |            |
|---|------------|------------|------------|----|------------|------------|------------|
| C | -3.5472629 | 3.7532321  | 0.4157192  | H  | 2.0923012  | -2.5787772 | 2.4240276  |
| C | -2.1763329 | 2.6231009  | 2.5877573  | H  | 2.6761914  | -3.5562302 | -3.3649049 |
| C | -3.5714998 | 2.4891453  | 2.4584740  | Zn | -2.1649019 | 0.4065622  | 0.4065622  |
| C | -4.2782410 | 3.0254118  | 1.3709382  | Br | -2.8798823 | 1.2124652  | -4.1481072 |
| C | -1.4988696 | 2.0259713  | 3.8202265  | Zn | -1.9007219 | -2.3521414 | -0.1252860 |
| H | -4.1145680 | 1.9231593  | 3.2291254  | Br | -2.0295106 | -4.6649088 | -0.5226190 |
| C | -1.8072417 | 0.5287546  | 3.9996923  | H  | -4.0851914 | 4.1868413  | -0.4440461 |
| H | -2.8845534 | 0.3508611  | 4.1990146  | C  | -0.0023140 | -0.6838918 | -6.1799574 |
| H | -1.2432457 | 0.1190147  | 4.8626810  | C  | -0.3669288 | -0.9394237 | -4.8552252 |
| H | -1.5241586 | -0.0492097 | 3.0985764  | C  | -0.8801106 | -2.2128884 | -4.5019507 |
| C | -1.8656476 | 2.8345685  | 5.0797606  | C  | -1.0059602 | -3.2242692 | -5.4898325 |
| H | -0.4025322 | 2.1225597  | 3.6879087  | C  | -0.6473674 | -2.9575477 | -6.8130483 |
| H | -2.9544470 | 2.7799519  | 5.2898408  | C  | -0.1485287 | -1.6856838 | -7.1559467 |
| H | -1.6008753 | 3.9049932  | 4.9628578  | H  | 0.3870644  | 0.3070763  | -6.4549551 |
| H | -1.3306289 | 2.4418971  | 5.9692447  | C  | -1.2641782 | -2.5386342 | -3.1447277 |
| C | -5.7836247 | 2.8493674  | 1.1949401  | H  | -1.3992885 | -4.2123355 | -5.2039192 |
| C | -6.3650452 | 1.6495509  | 1.9534721  | H  | -0.7572388 | -3.7347032 | -7.5837305 |
| H | -7.4191240 | 1.4765678  | 1.6556241  | H  | 0.1352790  | -1.4756851 | -8.1988844 |
| H | -6.3605151 | 1.8148187  | 3.0511861  | O  | -1.4227629 | -1.7014792 | -2.2206340 |
| H | -5.7942994 | 0.7209564  | 1.7512095  | H  | -0.2473163 | -0.1655174 | -4.0861547 |
| C | -6.5299933 | 4.1480914  | 1.5587020  | H  | -1.4661306 | -3.6100001 | -2.8968542 |
| H | -5.9474553 | 2.6650660  | 0.1083177  | C  | -5.8450264 | -0.5756821 | -1.3006306 |
| H | -7.6180945 | 4.0528618  | 1.3615263  | C  | -4.6716152 | -0.5911666 | -0.5981305 |
| H | -6.1497525 | 5.0118806  | 0.9774888  | C  | -4.6957087 | -1.8420744 | 0.1904667  |
| H | -6.3962957 | 4.3847469  | 2.6349752  | O  | -5.8732211 | -2.4778173 | 0.0610008  |
| C | -1.4516811 | 4.7197918  | -0.6056609 | C  | -6.6674058 | -1.7606521 | -0.9065106 |
| C | -1.6982655 | 4.1392410  | -2.0064440 | O  | -3.7869623 | -2.3095798 | 0.9009745  |
| H | -1.1730105 | 4.7397148  | -2.7773328 | C  | -3.4919581 | 0.2581339  | -0.5237709 |
| H | -2.7727340 | 4.1225541  | -2.2812628 | H  | -7.6392971 | -1.4968085 | -0.4321476 |
| H | -1.3166285 | 3.1031973  | -2.0765391 | H  | -6.8821612 | -2.4650654 | -1.7416305 |
| C | -1.8427383 | 6.2079776  | -0.5304396 | H  | -3.0275750 | 0.1809418  | 0.4793403  |
| H | -0.3605283 | 4.6565406  | -0.4265226 | H  | -3.7519784 | 1.3283803  | -0.6678958 |
| H | -1.2799715 | 6.8009767  | -1.2808193 | H  | -6.1687259 | 0.1786583  | -2.0301145 |
| H | -1.6348475 | 6.6341404  | 0.4725364  |    |            |            |            |
| H | -2.9249315 | 6.3516207  | -0.7323649 |    |            |            |            |
| H | 0.1434334  | -5.8228495 | -2.2753860 |    |            |            |            |
| H | 4.8935903  | -2.6682350 | -3.6291494 |    |            |            |            |
| H | 3.8720932  | -4.3622460 | 2.4431465  |    |            |            |            |
| C | 1.2376970  | -5.7968222 | -2.4901309 |    |            |            |            |
| H | 3.4764280  | 0.1855327  | -3.7336268 |    |            |            |            |
| H | 0.9230326  | -6.5150293 | -4.5276016 |    |            |            |            |
| H | 0.2870387  | -3.8332603 | 3.5198593  |    |            |            |            |
| C | 1.7875105  | -4.6161080 | -1.6927722 |    |            |            |            |
| C | 5.0943595  | -1.9104290 | -2.8430445 |    |            |            |            |
| C | 1.4234906  | -5.6736974 | -4.0065516 |    |            |            |            |
| H | 2.4975642  | -5.7054491 | -4.2870344 |    |            |            |            |
| C | 2.5013042  | -3.5583167 | -2.2790516 |    |            |            |            |
| C | 2.8128775  | -4.5922038 | 2.6740950  |    |            |            |            |
| H | 1.6615447  | -7.2782706 | -0.9060051 |    |            |            |            |
| C | 1.5730831  | -4.5657276 | -0.3010298 |    |            |            |            |
| C | 1.8322768  | -7.1286166 | -1.9899697 |    |            |            |            |
| H | 1.3785726  | -7.9888543 | -2.5242866 |    |            |            |            |
| H | 0.9784036  | -5.3622154 | 0.1702125  |    |            |            |            |
| C | 2.9192983  | -0.6576764 | -3.2751217 |    |            |            |            |
| H | 5.7340777  | -2.3886275 | -2.0739434 |    |            |            |            |
| H | 5.6744083  | -1.0880064 | -3.3109294 |    |            |            |            |
| C | 3.0153295  | -2.4888335 | -1.5186657 |    |            |            |            |
| C | 0.3976107  | -3.8836566 | 2.4172812  |    |            |            |            |
| C | 2.0793756  | -3.5350966 | 0.5058359  |    |            |            |            |
| H | 2.6951719  | -4.5923187 | 3.7776532  |    |            |            |            |
| H | 2.6102843  | -5.6211663 | 2.3095758  |    |            |            |            |
| C | 3.7872297  | -1.3783196 | -2.2278911 |    |            |            |            |
| C | 2.8271853  | -2.4910566 | -0.1143607 |    |            |            |            |
| C | 1.8505125  | -3.5822568 | 2.0183303  |    |            |            |            |
| H | 2.0025125  | -0.2469826 | -2.8092122 |    |            |            |            |
| H | -0.2945741 | -3.1446655 | 1.9730247  |    |            |            |            |
| H | 2.6168649  | -1.3408997 | -4.0963859 |    |            |            |            |
| H | 1.0032589  | -4.7307065 | -4.4088302 |    |            |            |            |
| H | 0.0659416  | -4.8914616 | 2.0957511  |    |            |            |            |
| H | 2.9285628  | -7.1563213 | -2.1642234 |    |            |            |            |
| H | 4.0711504  | -0.6262940 | -1.4634525 |    |            |            |            |

### TS7; COSMO

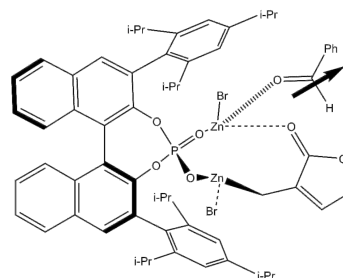

Energy (Hartree) = -11970.03965838

|   |            |           |            |
|---|------------|-----------|------------|
| C | -0.0957139 | 3.2645717 | 0.0307118  |
| C | 1.1549159  | 3.7393834 | -0.3813051 |
| C | 1.1857227  | 4.9524460 | -1.1654330 |
| C | 2.3670995  | 5.4260076 | -1.8117007 |
| C | -0.0306799 | 5.7138407 | -1.3265065 |
| C | 0.0048061  | 6.9393855 | -2.0580032 |
| C | -1.2525441 | 5.2133929 | -0.7905923 |
| H | -2.1696428 | 5.8107665 | -0.9124276 |
| C | -1.3243379 | 3.9729823 | -0.1668314 |
| C | 3.7233548  | 0.8937760 | 0.0224620  |
| C | 4.8160320  | 1.5952858 | 0.5187056  |
| H | 5.7651267  | 1.0641783 | 0.6860182  |
| C | 4.7324376  | 2.9727582 | 0.8688249  |
| C | 5.8371411  | 3.6452171 | 1.4736190  |
| C | 3.4998765  | 3.6912200 | 0.6499702  |
| C | 3.4139752  | 5.0359510 | 1.1224102  |
| C | 2.4007317  | 3.0136154 | -0.0001165 |
| C | 2.5298288  | 1.6388557 | -0.2350481 |
| O | -0.1708184 | 2.0904399 | 0.7592143  |
| O | 1.4721756  | 0.9451090 | -0.8104743 |
| P | 0.1414476  | 0.6191209 | 0.0948835  |



|   |            |            |            |    |            |            |            |
|---|------------|------------|------------|----|------------|------------|------------|
| O | -0.9203104 | 0.1629529  | -0.8909690 | H  | 4.8143950  | 0.4317266  | -4.4675627 |
| O | 0.4892899  | -0.2540342 | 1.3052530  | C  | 3.6839782  | -1.0992873 | -1.5388349 |
| C | 1.1781988  | 7.3856255  | -2.6476562 | C  | 3.0540902  | -1.7181676 | 3.2878935  |
| C | 2.3632720  | 6.6103764  | -2.5363023 | C  | 3.9024435  | -1.4787704 | 0.8859002  |
| H | -0.9278602 | 7.5163055  | -2.1606735 | H  | 5.5568429  | -0.6876393 | 3.8625931  |
| H | 1.1894030  | 8.3283009  | -3.2157878 | H  | 5.7908526  | -2.1646395 | 2.8720500  |
| H | 3.2898239  | 4.8335398  | -1.7401079 | C  | 3.5808788  | -0.1953912 | -2.7658188 |
| H | 3.2860862  | 6.9477365  | -3.0325327 | C  | 3.7699641  | -0.5835669 | -0.2171006 |
| C | 4.4992475  | 5.6552744  | 1.7276665  | C  | 4.0124281  | -0.9925789 | 2.3319213  |
| C | 5.7292864  | 4.9635785  | 1.8898620  | H  | 1.4050630  | -0.4180702 | -3.0078889 |
| H | 2.4673586  | 5.5828460  | 1.0153544  | H  | 2.0054281  | -1.6029165 | 2.9634394  |
| H | 4.4017570  | 6.6899623  | 2.0903959  | H  | 2.3619680  | -1.5265205 | -4.0350081 |
| H | 6.5858986  | 5.4682019  | 2.3621847  | H  | 2.5324461  | -5.0651621 | -2.4508732 |
| H | 6.7745942  | 3.0860267  | 1.6207133  | H  | 3.2704835  | -2.8044255 | 3.3600806  |
| C | -3.5455278 | 2.9231813  | -0.7518300 | H  | 6.1929294  | -4.8446756 | -1.3926510 |
| C | -2.6071235 | 3.3237678  | 0.2435218  | H  | 3.4913825  | 0.8513240  | -2.4125561 |
| C | -4.6662526 | 2.1676739  | -0.3557735 | H  | 3.7285646  | 0.0788863  | 2.3476191  |
| C | -2.8493459 | 3.0110328  | 1.6122459  | H  | 3.6916642  | -2.8748018 | -2.7661948 |
| C | -3.9881187 | 2.2605650  | 1.9491597  | Zn | -2.2876896 | -0.7500470 | -2.0150544 |
| C | -4.8984296 | 1.8040456  | 0.9811435  | Br | -1.4047031 | -1.3458669 | -4.1140486 |
| C | -1.9461806 | 3.5142639  | 2.7376581  | Zn | -0.5451257 | -1.4563826 | 2.4468408  |
| H | -4.1628246 | 2.0164549  | 3.0082656  | Br | -0.6656129 | -1.4608801 | 4.7501675  |
| C | -1.4676354 | 2.3899109  | 3.6718724  | H  | -5.3798794 | 1.8264285  | -1.1237640 |
| H | -2.3078458 | 1.9024419  | 4.2077348  | C  | -0.4240962 | -4.5807791 | -2.4332240 |
| H | -0.7782672 | 2.7923044  | 4.4421586  | C  | -0.0928489 | -3.9942992 | -1.2091344 |
| H | -0.9232712 | 1.6051963  | 3.1131645  | C  | 0.3947210  | -4.7999083 | -0.1511696 |
| C | -2.6553039 | 4.6355821  | 3.5228701  | C  | 0.5655227  | -6.1909407 | -0.3368438 |
| H | -1.0453970 | 3.9674745  | 2.2768066  | C  | 0.2170008  | -6.7772782 | -1.5606425 |
| H | -3.5712622 | 4.2574007  | 4.0236817  | C  | -0.2785299 | -5.9728223 | -2.6032026 |
| H | -2.9572065 | 5.4672130  | 2.8539445  | H  | -0.7947386 | -3.9436887 | -3.2521228 |
| H | -1.9876288 | 5.0487396  | 4.3072684  | C  | 0.6617805  | -4.2056353 | 1.1595180  |
| C | -6.1138758 | 0.9671026  | 1.3609225  | H  | 0.9557638  | -6.8070575 | 0.4889944  |
| C | -5.7718958 | -0.1572387 | 2.3533779  | H  | 0.3369999  | -7.8609890 | -1.7078874 |
| H | -6.6415427 | -0.8306845 | 2.4964737  | H  | -0.5449906 | -6.4329017 | -3.5672924 |
| H | -5.5022882 | 0.2465631  | 3.3512842  | O  | 0.3009567  | -3.0635790 | 1.4525680  |
| H | -4.9126576 | -0.7619853 | 2.0009771  | H  | -0.1932509 | -2.9085812 | -1.0534836 |
| C | -7.2489281 | 1.8598408  | 1.8983048  | H  | 1.1884980  | -4.8448659 | 1.9162666  |
| H | -6.4776108 | 0.4903750  | 0.4233064  | C  | -3.9336771 | -3.9029598 | -0.6286664 |
| H | -8.1526497 | 1.2589603  | 2.1314744  | C  | -3.6553236 | -2.5889964 | -0.3625139 |
| H | -7.5321440 | 2.6388274  | 1.1619733  | C  | -2.7830562 | -2.6103192 | 0.8294286  |
| H | -6.9340673 | 2.3758859  | 2.8297505  | O  | -2.5654240 | -3.8661577 | 1.2572376  |
| C | -3.3617313 | 3.2279246  | -2.2406341 | C  | -3.2585531 | -4.7766921 | 0.3740774  |
| C | -2.9023484 | 1.9844708  | -3.0198915 | O  | -2.2805008 | -1.6265564 | 1.3965169  |
| H | -2.7690507 | 2.1994715  | -4.0997626 | C  | -3.9533634 | -1.3259418 | -1.0425204 |
| H | -3.6559732 | 1.1679631  | -2.9480343 | H  | -3.9515073 | -5.3885290 | 0.9924815  |
| H | -1.9228557 | 1.6282547  | -2.6401405 | H  | -2.4982637 | -5.4613425 | -0.0654748 |
| C | -4.6174063 | 3.8546945  | -2.8696900 | H  | -4.1299580 | -0.5063496 | -0.3192834 |
| H | -2.5471578 | 3.9701942  | -2.3389133 | H  | -4.7952054 | -1.4095130 | -1.7551486 |
| H | -4.4160269 | 4.1519626  | -3.9193090 | H  | -4.5394921 | -4.2949076 | -1.4564850 |
| H | -4.9393901 | 4.7574573  | -2.3117031 |    |            |            |            |
| H | -5.4727176 | 3.1477207  | -2.8871227 |    |            |            |            |
| H | 3.4458653  | -5.3919918 | -0.0936800 |    |            |            |            |
| H | 5.0276588  | -1.2889177 | -4.0175290 |    |            |            |            |
| H | 6.1745460  | -0.5611739 | 2.1824502  |    |            |            |            |
| C | 4.0624615  | -4.8973531 | -0.8788967 |    |            |            |            |
| H | 2.2483979  | 0.2057374  | -4.4573279 |    |            |            |            |
| H | 3.5820276  | -6.5067159 | -2.2741489 |    |            |            |            |
| H | 3.1301765  | -1.2983786 | 4.3111930  |    |            |            |            |
| C | 3.9039852  | -3.3935340 | -0.6722000 |    |            |            |            |
| C | 4.8687134  | -0.2689742 | -3.6086055 |    |            |            |            |
| C | 3.5675737  | -5.3986292 | -2.2404194 |    |            |            |            |
| H | 4.2158305  | -5.0371880 | -3.0658512 |    |            |            |            |
| C | 3.7505548  | -2.4921152 | -1.7369603 |    |            |            |            |
| C | 5.4642712  | -1.1037163 | 2.8380015  |    |            |            |            |
| H | 5.8828715  | -5.0103617 | 0.3624786  |    |            |            |            |
| C | 3.9664567  | -2.8598191 | 0.6286229  |    |            |            |            |
| C | 5.5270958  | -5.3184012 | -0.6410881 |    |            |            |            |
| H | 5.6439145  | -6.4190465 | -0.7251177 |    |            |            |            |
| H | 4.0774123  | -3.5533937 | 1.4788904  |    |            |            |            |
| C | 2.3310443  | -0.5026771 | -3.6072744 |    |            |            |            |
| H | 5.7616893  | -0.0056801 | -3.0054739 |    |            |            |            |

### TS7

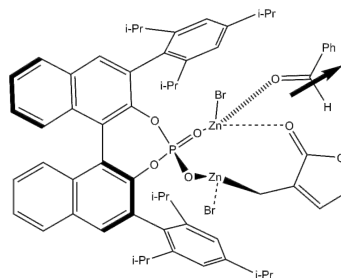

Energy (Hartree) = -11970.02595831  
number of imaginary frequencies: 1

|   |            |           |            |
|---|------------|-----------|------------|
| C | -0.0988400 | 3.2637604 | 0.0351944  |
| C | 1.1521769  | 3.7364310 | -0.3783385 |
| C | 1.1834047  | 4.9487575 | -1.1635643 |
| C | 2.3643554  | 5.4202198 | -1.8115744 |
| C | -0.0317063 | 5.7122546 | -1.3233438 |
| C | 0.0056990  | 6.9372285 | -2.0547457 |

|   |            |            |            |    |            |            |            |
|---|------------|------------|------------|----|------------|------------|------------|
| C | -1.2534179 | 5.2133756  | -0.7863752 | H  | 3.5971590  | -6.5129264 | -2.2732101 |
| H | -2.1708007 | 5.8105194  | -0.9077159 | H  | 3.1375393  | -1.3092000 | 4.3177634  |
| C | -1.3266472 | 3.9733992  | -0.1624571 | C  | 3.9048537  | -3.3978572 | -0.6697905 |
| C | 3.7179321  | 0.8883260  | 0.0266786  | C  | 4.8521279  | -0.2677880 | -3.6039075 |
| C | 4.8125836  | 1.5902187  | 0.5170943  | C  | 3.5715776  | -5.4050846 | -2.2364020 |
| H | 5.7614660  | 1.0578693  | 0.6810932  | H  | 4.2093645  | -5.0365532 | -3.0666318 |
| C | 4.7320479  | 2.9683703  | 0.8638507  | C  | 3.7441041  | -2.4966109 | -1.7332039 |
| C | 5.8389359  | 3.6415191  | 1.4626328  | C  | 5.4691709  | -1.0934263 | 2.8343160  |
| C | 3.4998081  | 3.6874635  | 0.6468607  | H  | 5.9067405  | -4.9968383 | 0.3449321  |
| C | 3.4174386  | 5.0335067  | 1.1153328  | C  | 3.9696419  | -2.8648673 | 0.6309297  |
| C | 2.3976649  | 3.0095713  | 0.0022165  | C  | 5.5439923  | -5.3089406 | -0.6546735 |
| C | 2.5242334  | 1.6338391  | -0.2285636 | H  | 5.6712740  | -6.4083114 | -0.7403695 |
| O | -0.1771059 | 2.0931802  | 0.7665740  | H  | 4.0872307  | -3.5580798 | 1.4807439  |
| O | 1.4645461  | 0.9384870  | -0.7970737 | C  | 2.3149447  | -0.5120212 | -3.6004946 |
| P | 0.1382987  | 0.6165133  | 0.1164508  | H  | 5.7443808  | -0.0011510 | -3.0014940 |
| O | -0.9246495 | 0.1461060  | -0.8616967 | H  | 4.7940676  | 0.4325159  | -4.4627905 |
| O | 0.4909384  | -0.2399730 | 1.3363089  | C  | 3.6740415  | -1.1042631 | -1.5341602 |
| C | 1.1785658  | 7.3815423  | -2.6455618 | C  | 3.0702318  | -1.7357503 | 3.2969762  |
| C | 2.3617568  | 6.6043394  | -2.5356923 | C  | 3.9019255  | -1.4843805 | 0.8896787  |
| H | -0.9261238 | 7.5157174  | -2.1562716 | H  | 5.5620794  | -0.6794071 | 3.8595933  |
| H | 1.1905541  | 8.3242382  | -3.2135229 | H  | 5.8088394  | -2.1502981 | 2.8636969  |
| H | 3.2855107  | 4.8255104  | -1.7404005 | C  | 3.5644627  | -0.2004099 | -2.7605033 |
| H | 3.2846526  | 6.9398410  | -3.0328814 | C  | 3.7639603  | -0.5892065 | -0.2124515 |
| C | 4.5053540  | 5.6531837  | 1.7144019  | C  | 4.0137008  | -0.9982992 | 2.3356226  |
| C | 5.7345564  | 4.9608625  | 1.8747370  | H  | 1.3889217  | -0.4320121 | -3.0006841 |
| H | 2.4708753  | 5.5804462  | 1.0092848  | H  | 2.0186016  | -1.6425651 | 2.9757479  |
| H | 4.4102020  | 6.6891526  | 2.0738922  | H  | 2.3485461  | -1.5343224 | -4.0316113 |
| H | 6.5934397  | 5.4656590  | 2.3425902  | H  | 2.5321806  | -5.0806726 | -2.4391648 |
| H | 6.7758552  | 3.0812098  | 1.6087863  | H  | 3.3076327  | -2.8172172 | 3.3772319  |
| C | -3.5457785 | 2.9253497  | -0.7538125 | H  | 6.1982496  | -4.8280126 | -1.4114136 |
| C | -2.6104023 | 3.3242471  | 0.2449050  | H  | 3.4711496  | 0.8455888  | -2.4064176 |
| C | -4.6704188 | 2.1742927  | -0.3617329 | H  | 3.7164359  | 0.0694978  | 2.3532297  |
| C | -2.8571776 | 3.0104641  | 1.6123934  | H  | 3.6824444  | -2.8781618 | -2.7626521 |
| C | -3.9992773 | 2.2632326  | 1.9445920  | Zn | -2.2854111 | -0.7558475 | -2.0018402 |
| C | -4.9088324 | 1.8117058  | 0.9740933  | Br | -1.4154396 | -1.3763681 | -4.0874786 |
| C | -1.9557347 | 3.5074179  | 2.7419336  | Zn | -0.5263309 | -1.4543690 | 2.4795030  |
| H | -4.1767418 | 2.0179194  | 3.0028816  | Br | -0.6423458 | -1.5194153 | 4.7704878  |
| C | -1.4811555 | 2.3788772  | 3.6733817  | H  | -5.3826041 | 1.8354779  | -1.1322052 |
| H | -2.3218728 | 1.8908489  | 4.2078458  | C  | -0.4223362 | -4.5800530 | -2.4479305 |
| H | -0.7919887 | 2.7764671  | 4.4459881  | C  | -0.0855876 | -3.9881073 | -1.2274993 |
| H | -0.9358500 | 1.5950646  | 3.1146481  | C  | 0.4013215  | -4.7887337 | -0.1661931 |
| C | -2.6650253 | 4.6272652  | 3.5288909  | C  | 0.5667049  | -6.1810036 | -0.3447060 |
| H | -1.0531897 | 3.9606759  | 2.2845840  | C  | 0.2146153  | -6.7732563 | -1.5643409 |
| H | -3.5831448 | 4.2497755  | 4.0259808  | C  | -0.2808562 | -5.9728873 | -2.6100974 |
| H | -2.9641123 | 5.4616441  | 2.8623924  | H  | -0.7935852 | -3.9420050 | -3.2664952 |
| H | -1.9992578 | 5.0363438  | 4.3169032  | C  | 0.6743884  | -4.1859956 | 1.1409266  |
| C | -6.1306576 | 0.9821776  | 1.3498066  | H  | 0.9580324  | -6.7934385 | 0.4836267  |
| C | -5.8021059 | -0.1398810 | 2.3491146  | H  | 0.3324716  | -7.8579873 | -1.7063108 |
| H | -6.6760536 | -0.8083949 | 2.4888775  | H  | -0.5498181 | -6.4376226 | -3.5713523 |
| H | -5.5381355 | 0.2654117  | 3.3477784  | O  | 0.3291412  | -3.0395442 | 1.4268358  |
| H | -4.9437527 | -0.7511366 | 2.0062148  | H  | -0.1824693 | -2.9009724 | -1.0798206 |
| C | -7.2644488 | 1.8835208  | 1.8749693  | H  | 1.1952489  | -4.8275024 | 1.9019401  |
| H | -6.4902101 | 0.5025922  | 0.4118134  | C  | -3.9250843 | -3.8914076 | -0.6213036 |
| H | -8.1735657 | 1.2897947  | 2.1053578  | C  | -3.6507617 | -2.5783738 | -0.3452524 |
| H | -7.5374470 | 2.6611412  | 1.1336451  | C  | -2.7666160 | -2.6065589 | 0.8403163  |
| H | -6.9528123 | 2.4028743  | 2.8054364  | O  | -2.5389390 | -3.8686818 | 1.2522381  |
| C | -3.3526301 | 3.2250057  | -2.2425405 | C  | -3.2348018 | -4.7716983 | 0.3667661  |
| C | -2.8947720 | 1.9772561  | -3.0156570 | O  | -2.2626379 | -1.6290050 | 1.4110508  |
| H | -2.7539861 | 2.1859228  | -4.0957336 | C  | -3.9529591 | -1.3123146 | -1.0120786 |
| H | -3.6512651 | 1.1633959  | -2.9454095 | H  | -3.9179909 | -5.3944850 | 0.9863828  |
| H | -1.9185635 | 1.6177456  | -2.6305251 | H  | -2.4741099 | -5.4471286 | -0.0874282 |
| C | -4.6014404 | 3.8567198  | -2.8799935 | H  | -4.1098261 | -0.4928635 | -0.2845745 |
| H | -2.5337136 | 3.9628995  | -2.3381657 | H  | -4.8020669 | -1.3858000 | -1.7167863 |
| H | -4.3943561 | 4.1500927  | -3.9295771 | H  | -4.5351199 | -4.2759448 | -1.4492688 |
| H | -4.9227033 | 4.7619853  | -2.3259121 |    |            |            |            |
| H | -5.4609917 | 3.1550114  | -2.9001312 |    |            |            |            |
| H | 3.4681181  | -5.4015238 | -0.0887266 |    |            |            |            |
| H | 5.0160187  | -1.2865683 | -4.0135544 |    |            |            |            |
| H | 6.1707645  | -0.5417486 | 2.1773866  |    |            |            |            |
| C | 4.0738790  | -4.9003157 | -0.8788450 |    |            |            |            |
| H | 2.2262739  | 0.1973698  | -4.4487218 |    |            |            |            |

int1; COSMO

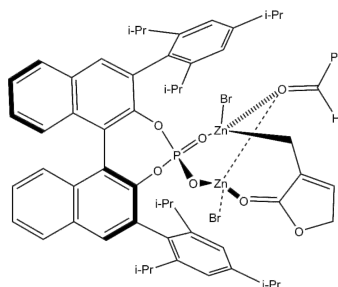

Energy (Hartree) = -11970.04535061

|   |            |            |            |
|---|------------|------------|------------|
| C | 1.0725436  | 2.0190479  | 1.7625406  |
| C | 2.4645732  | 2.0975531  | 1.9028890  |
| C | 3.0636957  | 3.4109722  | 1.9617196  |
| C | 4.4752122  | 3.6223007  | 1.9150604  |
| C | 2.2057283  | 4.5696608  | 2.0326099  |
| C | 2.7899947  | 5.8686798  | 2.1303970  |
| C | 0.7940661  | 4.4047665  | 1.9515990  |
| H | 0.1525440  | 5.2984418  | 1.9919805  |
| C | 0.2086809  | 3.1583355  | 1.7610345  |
| C | 3.9188264  | -1.3045617 | 0.8513722  |
| C | 4.9257448  | -1.4764528 | 1.7930452  |
| H | 5.5734357  | -2.3646339 | 1.7346166  |
| C | 5.1030303  | -0.5675251 | 2.8767862  |
| C | 6.0807543  | -0.8128599 | 3.8876428  |
| C | 4.2494148  | 0.5922654  | 2.9889337  |
| C | 4.3729179  | 1.4105961  | 4.1518243  |
| C | 3.2890337  | 0.8561958  | 1.9426454  |
| C | 3.1353467  | -0.1119572 | 0.9464087  |
| O | 0.4641221  | 0.7694059  | 1.6674896  |
| O | 2.1940382  | 0.0989407  | -0.0579619 |
| P | 0.6060139  | -0.0987135 | 0.2784121  |
| O | -0.1376954 | 0.5853816  | -0.8783012 |
| O | 0.2249919  | -1.5411211 | 0.6249485  |
| C | 4.1665813  | 6.0345044  | 2.1176221  |
| C | 5.0123265  | 4.9002333  | 1.9902560  |
| H | 2.1209989  | 6.7411311  | 2.1970785  |
| H | 4.6046539  | 7.0419486  | 2.1858236  |
| H | 5.1437375  | 2.7575307  | 1.8059108  |
| H | 6.1038788  | 5.0345732  | 1.9442098  |
| C | 5.3210440  | 1.1326791  | 5.1274127  |
| C | 6.1957892  | 0.0222943  | 4.9889793  |
| H | 3.6974994  | 2.2682462  | 4.2772312  |
| H | 5.3904889  | 1.7761347  | 6.0178361  |
| H | 6.9499131  | -0.1832338 | 5.7639792  |
| H | 6.7330092  | -1.6942454 | 3.7831430  |
| C | -1.8085668 | 3.4604445  | 0.2703206  |
| C | -1.2585858 | 3.0042122  | 1.5053124  |
| C | -3.1839650 | 3.2814058  | 0.0412993  |
| C | -2.1010928 | 2.3963177  | 2.4737561  |
| C | -3.4779171 | 2.2722534  | 2.2034929  |
| C | -4.0427596 | 2.6983296  | 0.9911179  |
| C | -1.5671496 | 1.8960556  | 3.8147855  |
| H | -4.1194718 | 1.8071357  | 2.9661504  |
| C | -1.8075415 | 0.3874741  | 4.0073225  |
| H | -2.8911060 | 0.1472752  | 4.0379097  |
| H | -1.3644908 | 0.0424199  | 4.9642481  |
| H | -1.3454811 | -0.1961323 | 3.1875527  |
| C | -2.1464624 | 2.7150164  | 4.9833639  |
| H | -0.4700072 | 2.0565328  | 3.8228315  |
| H | -3.2478430 | 2.5954140  | 5.0563319  |
| H | -1.9334416 | 3.7964168  | 4.8604221  |
| H | -1.7092472 | 2.3854681  | 5.9486665  |
| C | -5.5325578 | 2.5769911  | 0.6781971  |
| C | -6.2876885 | 1.5906606  | 1.5770986  |
| H | -7.3307476 | 1.4646331  | 1.2217196  |
| H | -6.3424695 | 1.9537830  | 2.6246481  |

|    |            |            |            |
|----|------------|------------|------------|
| H  | -5.8055710 | 0.5929036  | 1.5874001  |
| C  | -6.2058795 | 3.9642639  | 0.7079489  |
| H  | -5.6026795 | 2.2006677  | -0.3689565 |
| H  | -7.2732627 | 3.8960502  | 0.4114399  |
| H  | -5.7041587 | 4.6762585  | 0.0226469  |
| H  | -6.1603496 | 4.3940144  | 1.7305522  |
| C  | -0.9745093 | 4.1855494  | -0.7880918 |
| C  | -1.0850082 | 3.5701666  | -2.1921857 |
| H  | -0.5068320 | 4.1700775  | -2.9242075 |
| H  | -2.1311667 | 3.5160686  | -2.5562050 |
| H  | -0.6596819 | 2.5500648  | -2.2027111 |
| C  | -1.3391623 | 5.6835139  | -0.8133271 |
| H  | 0.0904387  | 4.1082857  | -0.4919358 |
| H  | -0.6883962 | 6.2353802  | -1.5228476 |
| H  | -1.2282899 | 6.1483028  | 0.1874587  |
| H  | -2.3920881 | 5.8325218  | -1.1327597 |
| H  | 1.6662157  | -5.9836978 | -2.6868494 |
| H  | 5.5984200  | -1.8019148 | -3.5537826 |
| H  | 4.9035181  | -4.7108328 | 1.7690782  |
| C  | 1.6903384  | -4.9571458 | -3.1158893 |
| H  | 4.0650865  | 1.0145259  | -3.2921907 |
| H  | -0.3550404 | -5.1193183 | -3.9204038 |
| H  | 1.3976779  | -4.6053819 | 3.2202387  |
| C  | 2.4278548  | -4.0764427 | -2.1145130 |
| C  | 5.7315426  | -1.1534133 | -2.6623333 |
| C  | 0.2304417  | -4.4721785 | -3.2333423 |
| H  | 0.1981799  | -3.4330774 | -3.6249012 |
| C  | 3.0827442  | -2.8946745 | -2.5011208 |
| C  | 3.8752419  | -5.0421298 | 2.0212246  |
| H  | 3.4237866  | -5.3445223 | -4.4145288 |
| C  | 2.3849722  | -4.3865815 | -0.7445243 |
| C  | 2.3606605  | -5.0393020 | -4.4940806 |
| H  | 1.8375868  | -5.7766890 | -5.1366800 |
| H  | 1.8807835  | -5.3148873 | -0.4305205 |
| C  | 3.5338499  | 0.0747064  | -3.0354107 |
| H  | 6.3545100  | -1.7099218 | -1.9326015 |
| H  | 6.2949919  | -0.2515029 | -2.9806992 |
| C  | 3.6373572  | -2.0094347 | -1.5605070 |
| C  | 1.4219113  | -4.3961579 | 2.1306075  |
| C  | 2.9217680  | -3.5371089 | 0.2397786  |
| H  | 3.8545475  | -5.3119356 | 3.0978240  |
| H  | 3.6720156  | -5.9638863 | 1.4363532  |
| C  | 4.3698734  | -0.7634225 | -2.0546310 |
| C  | 3.5349092  | -2.3196774 | -0.1764720 |
| C  | 2.8308026  | -3.9528161 | 1.7080771  |
| H  | 2.5506882  | 0.3406971  | -2.6026225 |
| H  | 0.6769414  | -3.6105637 | 1.9062614  |
| H  | 3.3433065  | -0.4649005 | -3.9859605 |
| H  | -0.2643757 | -4.4752969 | -2.2411309 |
| H  | 1.0937303  | -5.3195429 | 1.6111092  |
| H  | 2.3258743  | -4.0650372 | -5.0247489 |
| H  | 4.5839794  | -0.1250356 | -1.1728789 |
| H  | 3.0817593  | -3.0663546 | 2.3240105  |
| H  | 3.1485439  | -2.6371143 | -3.5687028 |
| Zn | -1.1233467 | 0.0229325  | -2.4560033 |
| Br | -0.1166935 | 0.2517757  | -4.5398894 |
| Zn | -1.6459764 | -2.1996311 | 0.2867631  |
| Br | -2.0214700 | -4.5203950 | 0.5078052  |
| H  | -3.6077238 | 3.6104791  | -0.9217042 |
| C  | -4.1624952 | -1.6152427 | -5.7633624 |
| C  | -3.2886372 | -1.6667296 | -4.6752378 |
| C  | -3.4456219 | -2.6806366 | -3.6961324 |
| C  | -4.4815757 | -3.6432150 | -3.8399782 |
| C  | -5.3586391 | -3.5764612 | -4.9266610 |
| C  | -5.1982145 | -2.5611872 | -5.8881289 |
| H  | -4.0348899 | -0.8321057 | -6.5253211 |
| C  | -2.6222631 | -2.8013889 | -2.5075230 |
| H  | -4.5900421 | -4.4351141 | -3.0818729 |
| H  | -6.1643488 | -4.3179656 | -5.0328357 |
| H  | -5.8841558 | -2.5099257 | -6.7477911 |
| O  | -1.7647322 | -1.9887854 | -2.0710003 |

|   |            |            |            |
|---|------------|------------|------------|
| H | -2.4680041 | -0.9378258 | -4.5982778 |
| H | -2.7888555 | -3.7151068 | -1.8855642 |
| C | -5.3296698 | -1.2963548 | -0.4733650 |
| C | -4.0935306 | -0.7001796 | -0.4606088 |
| C | -4.0090963 | 0.0288294  | -1.7482089 |
| O | -5.1690845 | -0.0436076 | -2.4261287 |
| C | -6.0717300 | -0.9031120 | -1.7017439 |
| O | -3.0495403 | 0.6403857  | -2.2525954 |
| C | -3.0072629 | -0.7014910 | 0.5128840  |
| H | -6.3266142 | -1.7516156 | -2.3776186 |
| H | -7.0090234 | -0.3391584 | -1.4979675 |
| H | -3.3925326 | -0.8480046 | 1.5407946  |
| H | -2.4494073 | 0.2537225  | 0.4741515  |
| H | -5.7552887 | -1.9370267 | 0.3106234  |

int1

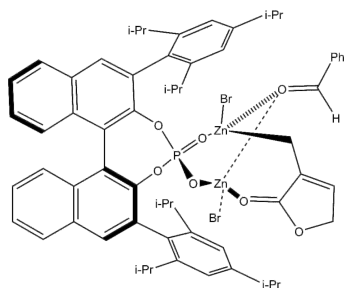

Energy (Hartree) = -11970.03245571

|   |            |            |            |
|---|------------|------------|------------|
| C | 1.0744621  | 2.0268018  | 1.7741053  |
| C | 2.4667473  | 2.1017593  | 1.9140616  |
| C | 3.0683985  | 3.4138452  | 1.9753234  |
| C | 4.4802050  | 3.6219598  | 1.9305180  |
| C | 2.2134315  | 4.5745268  | 2.0472506  |
| C | 2.8012403  | 5.8711435  | 2.1484648  |
| C | 0.8018158  | 4.4131451  | 1.9629114  |
| H | 0.1615169  | 5.3078262  | 2.0010114  |
| C | 0.2137799  | 3.1685467  | 1.7706326  |
| C | 3.9059659  | -1.3019233 | 0.8475612  |
| C | 4.9137686  | -1.4806465 | 1.7868067  |
| H | 5.5559689  | -2.3724559 | 1.7237895  |
| C | 5.0982314  | -0.5761060 | 2.8726475  |
| C | 6.0770843  | -0.8280639 | 3.8800949  |
| C | 4.2503715  | 0.5871187  | 2.9905450  |
| C | 4.3811767  | 1.4015005  | 4.1550739  |
| C | 3.2883013  | 0.8582098  | 1.9479369  |
| C | 3.1288902  | -0.1057883 | 0.9485772  |
| O | 0.4615811  | 0.7799017  | 1.6794531  |
| O | 2.1855190  | 0.1121614  | -0.0520017 |
| P | 0.6001894  | -0.0880698 | 0.2902068  |
| O | -0.1515671 | 0.5962611  | -0.8612802 |
| O | 0.2231518  | -1.5312457 | 0.6370669  |
| C | 4.1776775  | 6.0336716  | 2.1382742  |
| C | 5.0202266  | 4.8979177  | 2.0096875  |
| H | 2.1341982  | 6.7450548  | 2.2154813  |
| H | 4.6179934  | 7.0398861  | 2.2093119  |
| H | 5.1456306  | 2.7550773  | 1.8205047  |
| H | 6.1121540  | 5.0293004  | 1.9654180  |
| C | 5.3310036  | 1.1170474  | 5.1264864  |
| C | 6.1996665  | 0.0033313  | 4.9827740  |
| H | 3.7099145  | 2.2618368  | 4.2835355  |
| H | 5.4062384  | 1.7581973  | 6.0180401  |
| H | 6.9551397  | -0.2079522 | 5.7548339  |
| H | 6.7243472  | -1.7125848 | 3.7714430  |
| C | -1.7956547 | 3.4692654  | 0.2695083  |
| C | -1.2525979 | 3.0168166  | 1.5086621  |
| C | -3.1693876 | 3.2883401  | 0.0335002  |

|   |            |            |            |
|---|------------|------------|------------|
| C | -2.1000712 | 2.4115928  | 2.4741417  |
| C | -3.4749965 | 2.2857712  | 2.1965551  |
| C | -4.0329189 | 2.7077914  | 0.9799137  |
| C | -1.5728864 | 1.9169562  | 3.8198849  |
| H | -4.1205932 | 1.8235735  | 2.9575791  |
| C | -1.8133471 | 0.4093538  | 4.0184236  |
| H | -2.8968536 | 0.1680262  | 4.0441064  |
| H | -1.3764484 | 0.0687862  | 4.9796345  |
| H | -1.3448260 | -0.1783616 | 3.2055046  |
| C | -2.1575204 | 2.7420564  | 4.9812759  |
| H | -0.4758022 | 2.0774688  | 3.8319248  |
| H | -3.2592845 | 2.6239674  | 5.0497505  |
| H | -1.9441677 | 3.8226331  | 4.8535965  |
| H | -1.7257769 | 2.4178202  | 5.9507651  |
| C | -5.5213041 | 2.5877314  | 0.6597244  |
| C | -6.2799046 | 1.5946550  | 1.5484039  |
| H | -7.3224020 | 1.4717085  | 1.1898684  |
| H | -6.3390760 | 1.9499242  | 2.5982971  |
| H | -5.7977023 | 0.5969675  | 1.5530732  |
| C | -6.1949037 | 3.9745064  | 0.6971957  |
| H | -5.5873728 | 2.2181236  | -0.3902855 |
| H | -7.2613471 | 3.9104046  | 0.3962007  |
| H | -5.6894307 | 4.6917671  | 0.0204939  |
| H | -6.1524038 | 4.3967822  | 1.7228105  |
| C | -0.9566292 | 4.1928556  | -0.7860447 |
| C | -1.0562379 | 3.5742593  | -2.1895514 |
| H | -0.4817117 | 4.1776207  | -2.9213475 |
| H | -2.0999881 | 3.5083513  | -2.5584438 |
| H | -0.6195089 | 2.5590405  | -2.1981282 |
| C | -1.3249023 | 5.6897863  | -0.8162730 |
| H | 0.1065210  | 4.1191882  | -0.4826868 |
| H | -0.6707836 | 6.2427709  | -1.5217087 |
| H | -1.2232840 | 6.1564302  | 0.1845270  |
| H | -2.3757976 | 5.8365576  | -1.1430555 |
| H | 1.6705711  | -5.9787059 | -2.7029342 |
| H | 5.5695101  | -1.7881600 | -3.5641767 |
| H | 4.8852202  | -4.7128294 | 1.7496328  |
| C | 1.6789403  | -4.9497988 | -3.1270687 |
| H | 4.0429206  | 1.0302004  | -3.2917169 |
| H | -0.3653896 | -5.1381718 | -3.9279083 |
| H | 1.3838988  | -6.1123335 | 3.2111599  |
| C | 2.4085081  | -4.0648942 | -2.1234242 |
| C | 5.7064052  | -1.1422193 | -2.6716388 |
| C | 0.2120011  | -4.4855469 | -3.2389636 |
| H | 0.1651364  | -3.4457652 | -3.6270960 |
| C | 3.0599275  | -2.8808538 | -2.5074534 |
| C | 3.8573153  | -5.0426250 | 2.0049621  |
| H | 3.4144217  | -5.3036027 | -4.4320763 |
| C | 2.3650684  | -4.3772303 | -0.7542682 |
| C | 2.3461938  | -5.0163558 | -4.5074195 |
| H | 1.8340725  | -5.7599635 | -5.1516539 |
| H | 1.8620789  | -5.3066507 | -0.4418029 |
| C | 3.5099716  | 0.0919710  | -3.0333983 |
| H | 6.3303106  | -1.7026831 | -1.9460213 |
| H | 6.2709280  | -0.2409377 | -2.9896975 |
| C | 3.6151330  | -1.9977316 | -1.5655007 |
| C | 1.4052003  | -4.3955566 | 2.1231323  |
| C | 2.9022469  | -3.5304026 | 0.2316187  |
| H | 3.8400528  | -5.3165122 | 3.0805208  |
| H | 3.6518015  | -5.9620566 | 1.4175834  |
| C | 4.3476313  | -0.7511620 | -2.0584192 |
| C | 3.5157509  | -2.3124023 | -0.1823967 |
| C | 2.8131571  | -3.9511659 | 1.6986655  |
| H | 2.5308696  | 0.3631463  | -2.5950885 |
| H | 0.6602174  | -3.6073624 | 1.9093010  |
| H | 3.3112832  | -0.4438091 | -3.9843056 |
| H | -0.2801458 | -4.5018264 | -2.2455164 |
| H | 1.0717287  | -5.3144092 | 1.5993151  |
| H | 2.2931320  | -4.0411927 | -5.0347109 |
| H | 4.5663459  | -0.1159801 | -1.1754403 |
| H | 3.0659913  | -3.0673351 | 2.3176657  |

|    |            |            |            |   |            |            |            |
|----|------------|------------|------------|---|------------|------------|------------|
| H  | 3.1250319  | -2.6204069 | -3.5742692 | O | -0.4643697 | -1.2676987 | 0.4426764  |
| Zn | -1.1135219 | 0.0442836  | -2.4539924 | C | 3.6549680  | 6.2791810  | 1.3645395  |
| Br | -0.1470577 | 0.2374420  | -4.5510956 | C | 4.5087822  | 5.1692979  | 1.1242721  |
| Zn | -1.6362734 | -2.2102654 | 0.3007757  | H | 1.6287834  | 6.9267083  | 1.7699717  |
| Br | -2.0442409 | -4.5197092 | 0.4932525  | H | 4.0634749  | 7.3009929  | 1.3416154  |
| H  | -3.5875402 | 3.6135606  | -0.9332869 | H | 4.6784805  | 3.0237202  | 0.9667757  |
| C  | -4.1788215 | -1.6328852 | -5.7442718 | H | 5.5738635  | 5.3368713  | 0.9025227  |
| C  | -3.3029164 | -1.6686924 | -4.6564344 | C | 5.2959022  | 1.5824090  | 4.3961175  |
| C  | -3.4306523 | -2.6948968 | -3.6872381 | C | 6.1284899  | 0.4381074  | 4.2745942  |
| C  | -4.4393994 | -3.6836990 | -3.8392325 | H | 3.6074191  | 2.6766842  | 3.6305813  |
| C  | -5.3185097 | -3.6328125 | -4.9251354 | H | 5.4795128  | 2.3091348  | 5.2022233  |
| C  | -5.1869805 | -2.6055471 | -5.8781374 | H | 6.9644702  | 0.2891261  | 4.9748944  |
| H  | -4.0716289 | -0.8391222 | -6.4983697 | H | 6.4789989  | -1.4123733 | 3.2055036  |
| C  | -2.5983611 | -2.8065812 | -2.5003883 | C | -2.5091248 | 3.5133739  | 0.7090135  |
| H  | -4.5233015 | -4.4844145 | -3.0869717 | C | -1.6856324 | 3.0281313  | 1.7678195  |
| H  | -6.1023295 | -4.3966153 | -5.0384549 | C | -3.8799911 | 3.1938966  | 0.7200108  |
| H  | -5.8739745 | -2.5669373 | -6.7377520 | C | -2.2616309 | 2.2468704  | 2.8108651  |
| O  | -1.7625480 | -1.9763566 | -2.0613393 | C | -3.6393985 | 1.9666442  | 2.7739594  |
| H  | -2.5015357 | -0.9187075 | -4.5740889 | C | -4.4697077 | 2.4226584  | 1.7357688  |
| H  | -2.7401517 | -3.7290672 | -1.8837030 | C | -1.4505259 | 1.7443039  | 4.0049834  |
| C  | -5.3069805 | -1.3410875 | -0.4705796 | H | -4.0776462 | 1.3718465  | 3.5903570  |
| C  | -4.0833801 | -0.7191144 | -0.4429772 | C | -1.5684011 | 0.2211194  | 4.1950417  |
| C  | -4.0026848 | 0.0207365  | -1.7271623 | H | -2.6008378 | -0.0781730 | 4.4721657  |
| O  | -5.1608402 | -0.0657377 | -2.4109977 | H | -0.8971215 | -0.1207934 | 5.0098079  |
| C  | -6.0491885 | -0.9480332 | -1.7006258 | H | -1.2872314 | -0.3183317 | 3.2695305  |
| O  | -3.0507591 | 0.6458449  | -2.2222570 | C | -1.8427331 | 2.5058848  | 5.2857835  |
| C  | -3.0025827 | -0.7091223 | 0.5315450  | H | -0.3821385 | 1.9705728  | 3.8155410  |
| H  | -6.2838337 | -1.7936913 | -2.3882180 | H | -2.9055605 | 2.3262008  | 5.5515711  |
| H  | -6.9978030 | -0.4022027 | -1.4962290 | H | -1.7088568 | 3.5995697  | 5.1597591  |
| H  | -3.3825018 | -0.8671582 | 1.5595810  | H | -1.2199737 | 2.1791837  | 6.1445133  |
| H  | -2.4469635 | 0.2468832  | 0.4929175  | C | -5.9695367 | 2.1553926  | 1.7211338  |
| H  | -5.7210196 | -1.9988534 | 0.3053123  | C | -6.3386031 | 0.7185081  | 2.1210250  |
|    |            |            |            | H | -7.4261370 | 0.5461674  | 1.9865047  |
|    |            |            |            | H | -6.1040322 | 0.5105873  | 3.1860712  |
|    |            |            |            | H | -5.7973471 | -0.0281324 | 1.5060645  |
|    |            |            |            | C | -6.7034433 | 3.1826084  | 2.6054177  |
|    |            |            |            | H | -6.3032762 | 2.3059084  | 0.6726498  |
|    |            |            |            | H | -7.8026703 | 3.0354769  | 2.5574352  |
|    |            |            |            | H | -6.4806178 | 4.2204865  | 2.2853702  |
|    |            |            |            | H | -6.3919655 | 3.0841496  | 3.6670201  |
|    |            |            |            | C | -1.9793283 | 4.3920078  | -0.4255810 |
|    |            |            |            | C | -2.3310584 | 3.8534815  | -1.8213267 |
|    |            |            |            | H | -1.9634713 | 4.5443102  | -2.6078493 |
|    |            |            |            | H | -3.4220844 | 3.7265864  | -1.9719439 |
|    |            |            |            | H | -1.8521177 | 2.8726009  | -1.9996099 |
|    |            |            |            | C | -2.4732983 | 5.8419344  | -0.2512969 |
|    |            |            |            | H | -0.8733731 | 4.4060633  | -0.3593062 |
|    |            |            |            | H | -2.0385221 | 6.5028228  | -1.0297327 |
|    |            |            |            | H | -2.1984002 | 6.2526765  | 0.7418969  |
|    |            |            |            | H | -3.5786400 | 5.8985811  | -0.3377654 |
|    |            |            |            | H | 0.0883844  | -5.6220591 | -2.4417287 |
|    |            |            |            | H | 5.1316410  | -2.8898145 | -3.6205171 |
|    |            |            |            | H | 3.7089343  | -3.6710989 | 2.5102069  |
|    |            |            |            | C | 1.1947952  | -5.6750240 | -2.5737539 |
|    |            |            |            | H | 4.1179760  | 0.1083950  | -3.7313287 |
|    |            |            |            | H | 0.9777085  | -6.4733225 | -4.5936050 |
|    |            |            |            | H | 0.0140268  | -3.6261169 | 3.3081007  |
|    |            |            |            | C | 1.7692577  | -4.4968808 | -1.7884678 |
|    |            |            |            | C | 5.3879873  | -2.1923401 | -2.7956008 |
|    |            |            |            | C | 1.4986885  | -5.6436013 | -4.0753078 |
|    |            |            |            | H | 2.5851889  | -5.7590688 | -4.2724478 |
|    |            |            |            | C | 2.6462903  | -3.5505716 | -2.3437333 |
|    |            |            |            | C | 2.6898052  | -4.0676012 | 2.6780409  |
|    |            |            |            | H | 1.4010244  | -7.1005907 | -0.8973660 |
|    |            |            |            | C | 1.4306819  | -4.3580056 | -0.4259276 |
|    |            |            |            | C | 1.6600719  | -7.0165979 | -1.9710101 |
|    |            |            |            | H | 1.1885506  | -7.8701784 | -2.5002930 |
|    |            |            |            | H | 0.7294004  | -5.0806307 | 0.0162752  |
|    |            |            |            | C | 3.4282891  | -0.6484950 | -3.3031174 |
|    |            |            |            | H | 5.9105120  | -2.7772797 | -2.0114900 |
|    |            |            |            | H | 6.1020322  | -1.4462670 | -3.2016583 |

## int2; COSMO

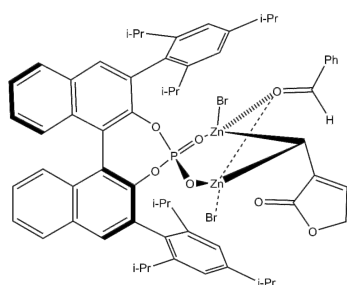

Energy (Hartree) = -11970.02786781

|   |            |            |            |
|---|------------|------------|------------|
| C | 0.6849083  | 2.1770570  | 1.5802783  |
| C | 2.0760082  | 2.2942878  | 1.4929923  |
| C | 2.6318851  | 3.6243352  | 1.4353899  |
| C | 4.0098222  | 3.8742199  | 1.1608406  |
| C | 1.7554234  | 4.7552740  | 1.6317423  |
| C | 2.3051340  | 6.0727478  | 1.6075834  |
| C | 0.3570153  | 4.5458223  | 1.8109509  |
| H | -0.2929917 | 5.4199029  | 1.9690120  |
| C | -0.2111347 | 3.2784272  | 1.7399609  |
| C | 3.3298713  | -1.2372387 | 0.6148084  |
| C | 4.4354290  | -1.3478423 | 1.4481804  |
| H | 5.0379395  | -2.2686094 | 1.4231892  |
| C | 4.7789792  | -0.3277392 | 2.3800853  |
| C | 5.8655572  | -0.5014750 | 3.2895131  |
| C | 3.9726292  | 0.8672283  | 2.4576523  |
| C | 4.2458785  | 1.7910487  | 3.5121993  |
| C | 2.9113098  | 1.0599650  | 1.4950319  |
| C | 2.6246180  | 0.0059718  | 0.6182295  |
| O | 0.1143433  | 0.9063428  | 1.5552824  |
| O | 1.6251131  | 0.1672250  | -0.3440344 |
| P | 0.0471594  | 0.1423788  | 0.1087453  |
| O | -0.7045001 | 0.9502682  | -0.9651449 |

|    |            |            |            |
|----|------------|------------|------------|
| C  | 3.1805148  | -2.4901224 | -1.5797439 |
| C  | 0.2282624  | -3.8318029 | 2.2396559  |
| C  | 1.9484321  | -3.3344570 | 0.3820001  |
| H  | 2.4786168  | -4.0121143 | 3.7661510  |
| H  | 2.6927744  | -5.1381666 | 2.3839738  |
| C  | 4.1365334  | -1.4951457 | -2.2333541 |
| C  | 2.8270496  | -2.3797917 | -0.2145621 |
| C  | 1.6209919  | -3.2948648 | 1.8763792  |
| H  | 2.5600432  | -0.1163111 | -2.8688298 |
| H  | -0.5669208 | -3.3596289 | 1.6356417  |
| H  | 3.0585975  | -1.2764261 | -4.1407164 |
| H  | 1.1778493  | -4.6954545 | -4.5497249 |
| H  | 0.1549156  | -4.9301392 | 2.0985767  |
| H  | 2.7617037  | -7.1226286 | -2.0614842 |
| H  | 4.4796818  | -0.7997759 | -1.4393012 |
| H  | 1.6580597  | -2.2311611 | 2.1939961  |
| H  | 2.9366409  | -3.6296723 | -3.4018572 |
| Zn | -2.3617668 | 0.2114335  | -1.8167104 |
| Br | -3.0264359 | 0.7125247  | -3.9835748 |
| Zn | -1.7937386 | -2.2176724 | -0.6838027 |
| Br | -2.3925423 | -4.4594969 | -0.8238434 |
| H  | -4.5183866 | 3.5419528  | -0.1061355 |
| C  | 0.8448961  | 0.5799978  | -5.6496325 |
| C  | 0.2938816  | -0.0841110 | -4.5522760 |
| C  | 0.0507231  | -1.4805743 | -4.6275334 |
| C  | 0.3616168  | -2.1936761 | -5.8126967 |
| C  | 0.9138714  | -1.5210240 | -6.9063602 |
| C  | 1.1554556  | -0.1360834 | -6.8217282 |
| H  | 1.0378513  | 1.6614212  | -5.5959285 |
| C  | -0.5215077 | -2.1871638 | -3.5021058 |
| H  | 0.1561018  | -3.2739218 | -5.8683870 |
| H  | 1.1558785  | -2.0692632 | -7.8287000 |
| H  | 1.5925415  | 0.3927886  | -7.6828540 |
| O  | -0.8896558 | -1.6047863 | -2.4554983 |
| H  | 0.0580387  | 0.4531304  | -3.6233002 |
| H  | -0.6517557 | -3.2933543 | -3.5759556 |
| C  | -5.5361357 | -2.1873572 | -1.1172916 |
| C  | -4.8259388 | -1.0517680 | -0.9042408 |
| C  | -5.6354911 | 0.0845155  | -1.4330180 |
| O  | -6.8116254 | -0.4066091 | -1.9330841 |
| C  | -6.8283135 | -1.8330650 | -1.7840050 |
| O  | -5.3592075 | 1.2707902  | -1.4333184 |
| C  | -3.4966241 | -0.7846406 | -0.3111708 |
| H  | -6.9389391 | -2.2963363 | -2.7904704 |
| H  | -7.7220732 | -2.1204976 | -1.1855062 |
| H  | -3.3168088 | -1.4475545 | 0.5676934  |
| H  | -3.4896691 | 0.2240686  | 0.1703942  |
| H  | -5.2359000 | -3.2149666 | -0.8674530 |

int2

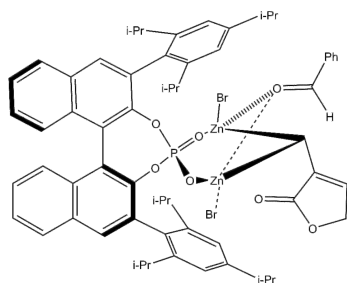

Energy (Hartree) = -11970.01481278

|   |            |           |           |
|---|------------|-----------|-----------|
| C | 0.6901649  | 2.1819882 | 1.6188019 |
| C | 2.0816714  | 2.2978781 | 1.5369222 |
| C | 2.6399014  | 3.6269550 | 1.4848019 |
| C | 4.0196797  | 3.8755176 | 1.2196350 |
| C | 1.7640118  | 4.7588314 | 1.6768995 |
| C | 2.3163501  | 6.0748003 | 1.6585411 |
| C | 0.3642336  | 4.5510170 | 1.8443901 |
| H | -0.2869720 | 5.4255376 | 1.9949272 |

|   |            |            |            |
|---|------------|------------|------------|
| C | -0.2056914 | 3.2848645  | 1.7694389  |
| C | 3.3276515  | -1.2286714 | 0.6319444  |
| C | 4.4325969  | -1.3479167 | 1.4647589  |
| H | 5.0324809  | -2.2701257 | 1.4305958  |
| C | 4.7784392  | -0.3370917 | 2.4054483  |
| C | 5.8640889  | -0.5195634 | 3.3134797  |
| C | 3.9749243  | 0.8588850  | 2.4922178  |
| C | 4.2508444  | 1.7743586  | 3.5529878  |
| C | 2.9140657  | 1.0616776  | 1.5316336  |
| C | 2.6246660  | 0.0158497  | 0.6456063  |
| O | 0.1195752  | 0.9118058  | 1.5933197  |
| O | 1.6257894  | 0.1865110  | -0.3138533 |
| P | 0.0491233  | 0.1524280  | 0.1437567  |
| O | -0.7130729 | 0.9594761  | -0.9211092 |
| O | -0.4508708 | -1.2628070 | 0.4759854  |
| C | 3.6676545  | 6.2798252  | 1.4257481  |
| C | 4.5209050  | 5.1694170  | 1.1894934  |
| H | 1.6398716  | 6.9293698  | 1.8170567  |
| H | 4.0776762  | 7.3010754  | 1.4076255  |
| H | 4.6874819  | 3.0237848  | 1.0288164  |
| H | 5.5877928  | 5.3354099  | 0.9756027  |
| C | 5.3005294  | 1.5570110  | 4.4344912  |
| C | 6.1296616  | 0.4117839  | 4.3049168  |
| H | 3.6142795  | 2.6606161  | 3.6762434  |
| H | 5.4863352  | 2.2777810  | 5.2453495  |
| H | 6.9652651  | 0.2553407  | 5.0039538  |
| H | 6.4750346  | -1.4315171 | 3.2229748  |
| C | -2.4903435 | 3.5237198  | 0.7107357  |
| C | -1.6808870 | 3.0383482  | 1.7804222  |
| C | -3.8616382 | 3.2076210  | 0.7061640  |
| C | -2.2709553 | 2.2600796  | 2.8171797  |
| C | -3.6488864 | 1.9836089  | 2.7644133  |
| C | -4.4657536 | 2.4409291  | 1.7166927  |
| C | -1.4751232 | 1.7581921  | 4.0217418  |
| H | -4.0981298 | 1.3917692  | 3.5769284  |
| C | -1.5991802 | 0.2360538  | 4.2146439  |
| H | -2.6351869 | -0.0604524 | 4.4811938  |
| H | -0.9384279 | -0.1060547 | 5.0377899  |
| H | -1.3090300 | -0.3071200 | 3.2942026  |
| C | -1.8791814 | 2.5250664  | 5.2954875  |
| H | -0.4040001 | 1.9806093  | 3.8434595  |
| H | -2.9456395 | 2.3508978  | 5.5496729  |
| H | -1.7406783 | 3.6177233  | 5.1673318  |
| H | -1.2681094 | 2.1993729  | 6.1629013  |
| C | -5.9669359 | 2.1830940  | 1.6853417  |
| C | -6.3533507 | 0.7568920  | 2.1056206  |
| H | -7.4395696 | 0.5895169  | 1.9554744  |
| H | -6.1400924 | 0.5667325  | 3.1784870  |
| H | -5.8073539 | -0.0056826 | 1.5148865  |
| C | -6.7051001 | 3.2317737  | 2.5402298  |
| H | -6.2843493 | 2.3164905  | 0.6295045  |
| H | -7.8047837 | 3.0932256  | 2.4795682  |
| H | -6.4688488 | 4.2616307  | 2.2050000  |
| H | -6.4091052 | 3.1514067  | 3.6076405  |
| C | -1.9459735 | 4.4002032  | -0.4188330 |
| C | -2.2804015 | 3.8619019  | -1.8191606 |
| H | -1.9133381 | 4.5586988  | -2.6005729 |
| H | -3.3682972 | 3.7240393  | -1.9820697 |
| H | -1.7880087 | 2.8876823  | -1.9970115 |
| C | -2.4416748 | 5.8502527  | -0.2503857 |
| H | -0.8409030 | 4.4138823  | -0.3389683 |
| H | -1.9961041 | 6.5121479  | -1.0217810 |
| H | -2.1820884 | 6.2602811  | 0.7471960  |
| H | -3.5455058 | 5.9081566  | -0.3520976 |
| H | 0.1344880  | -5.6239977 | -2.4655743 |
| H | 5.1361430  | -2.8014173 | -3.6181226 |
| H | 3.7160436  | -3.6820234 | 2.5158869  |
| C | 1.2417817  | -5.6615565 | -2.5957117 |
| H | 4.0499598  | 0.1761324  | -3.7159702 |
| H | 1.0374545  | -6.4439399 | -4.6240506 |
| H | 0.0146617  | -3.6627250 | 3.2908795  |



|    |            |            |            |
|----|------------|------------|------------|
| C  | 1.7986829  | -4.4813419 | -1.8013376 |
| C  | 5.3765554  | -2.0997889 | -2.7920292 |
| C  | 1.5492403  | -5.6144146 | -4.0960803 |
| H  | 2.6371802  | -5.7198103 | -4.2911553 |
| C  | 2.6590587  | -3.5162038 | -2.3492339 |
| C  | 2.6988699  | -4.0883150 | 2.6708105  |
| H  | 1.4629854  | -7.0963400 | -0.9302480 |
| C  | 1.4578435  | -4.3583292 | -0.4382435 |
| C  | 1.7237832  | -7.0010460 | -2.0022926 |
| H  | 1.2657237  | -7.8576439 | -2.5384924 |
| H  | 0.7650365  | -5.0930735 | -0.0027887 |
| C  | 3.3799663  | -0.6001518 | -3.2911376 |
| H  | 5.9133194  | -2.6749663 | -2.0106100 |
| H  | 6.0728941  | -1.3367295 | -3.1972319 |
| C  | 3.1771137  | -2.4543530 | -1.5769181 |
| C  | 0.2383296  | -3.8610252 | 2.2230807  |
| C  | 1.9624740  | -3.3355325 | 0.3786732  |
| H  | 2.4803286  | -4.0487147 | 3.7580695  |
| H  | 2.7124176  | -5.1547585 | 2.3628945  |
| C  | 4.1097009  | -1.4345973 | -2.2260244 |
| C  | 2.8283619  | -2.3641811 | -0.2092317 |
| C  | 1.6300628  | -3.3128787 | 1.8722134  |
| H  | 2.4993543  | -0.0922476 | -2.8525098 |
| H  | -0.5565692 | -3.3919213 | 1.6164237  |
| H  | 3.0262354  | -1.2323798 | -4.1322696 |
| H  | 1.2237764  | -4.6637863 | -4.5622199 |
| H  | 0.1724033  | -4.9588985 | 2.0756629  |
| H  | 2.8269424  | -7.0912680 | -2.0892965 |
| H  | 4.4371764  | -0.7350828 | -1.4290640 |
| H  | 1.6598864  | -2.2523354 | 2.2005801  |
| H  | 2.9492216  | -3.5808973 | -3.4083631 |
| Zn | -2.3830571 | 0.2452838  | -1.7622154 |
| Br | -2.9852104 | 0.6856003  | -3.9540027 |
| Zn | -1.7407615 | -2.2117826 | -0.6972951 |
| Br | -2.3434907 | -4.4454625 | -0.9070169 |
| H  | -4.4891784 | 3.5538693  | -0.1290327 |
| C  | 0.7734243  | 0.4692745  | -5.7870465 |
| C  | 0.2673845  | -0.1577869 | -4.6465203 |
| C  | -0.0003134 | -1.5505934 | -4.6741397 |
| C  | 0.2331539  | -2.2961793 | -5.8557709 |
| C  | 0.7415917  | -1.6610402 | -6.9922674 |
| C  | 1.0126700  | -0.2798729 | -6.9541403 |
| H  | 0.9819773  | 1.5490096  | -5.7710785 |
| C  | -0.5339701 | -2.2134046 | -3.5010893 |
| H  | 0.0045041  | -3.3731681 | -5.8731087 |
| H  | 0.9251036  | -2.2353180 | -7.9123387 |
| H  | 1.4137686  | 0.2199290  | -7.8495710 |
| O  | -0.8084207 | -1.5951529 | -2.4496361 |
| H  | 0.0759439  | 0.4044094  | -3.7223148 |
| H  | -0.7246868 | -3.3137623 | -3.5462749 |
| C  | -5.5199666 | -2.2043472 | -1.0966875 |
| C  | -4.7982019 | -1.0794504 | -0.8695082 |
| C  | -5.5841576 | 0.0710788  | -1.4059759 |
| O  | -6.7652058 | -0.3988233 | -1.9127883 |
| C  | -6.8007437 | -1.8235914 | -1.7750560 |
| O  | -5.2774269 | 1.2489523  | -1.4050199 |
| C  | -3.4735066 | -0.8236895 | -0.2665719 |
| H  | -6.9067120 | -2.2767027 | -2.7872580 |
| H  | -7.7056112 | -2.1048203 | -1.1893364 |
| H  | -3.2806233 | -1.5234291 | 0.5796130  |
| H  | -3.4708698 | 0.1666355  | 0.2513339  |
| H  | -5.2314270 | -3.2370946 | -0.8542621 |

Energy (Hartree) = -11970.02546206

|   |            |            |            |
|---|------------|------------|------------|
| C | 0.9137767  | 2.1621794  | 2.0962437  |
| C | 2.3116223  | 2.1260017  | 2.1185179  |
| C | 3.0129067  | 3.3896597  | 2.1534660  |
| C | 4.4275041  | 3.4992735  | 1.9963748  |
| C | 2.2511400  | 4.6054717  | 2.3191508  |
| C | 2.9383872  | 5.8538142  | 2.4074089  |
| C | 0.8273070  | 4.5545138  | 2.3091697  |
| H | 0.2627763  | 5.4971265  | 2.3743391  |
| C | 0.1383100  | 3.3618498  | 2.1237273  |
| C | 3.3314164  | -1.3845955 | 0.9182018  |
| C | 4.4237299  | -1.6440621 | 1.7384251  |
| H | 4.9737369  | -2.5897290 | 1.6167307  |
| C | 4.7995896  | -0.7623410 | 2.7912743  |
| C | 5.8565851  | -1.0996905 | 3.6900841  |
| C | 4.0577649  | 0.4587303  | 2.9983436  |
| C | 4.3619303  | 1.2427856  | 4.1522335  |
| C | 3.0222730  | 0.8178326  | 2.0566275  |
| C | 2.6778754  | -0.1248207 | 1.0788132  |
| O | 0.2044916  | 0.9597722  | 2.0638184  |
| O | 1.6668188  | 0.1686802  | 0.1630149  |
| P | 0.1043017  | 0.1522424  | 0.6485507  |
| O | -0.6616897 | 0.9030277  | -0.4518057 |
| O | -0.4175314 | -1.2470889 | 1.0323978  |
| C | 4.3188067  | 5.9188456  | 2.2921333  |
| C | 5.0640546  | 4.7314220  | 2.0642014  |
| H | 2.3441748  | 6.7705647  | 2.5471118  |
| H | 4.8353217  | 6.8887612  | 2.3545940  |
| H | 5.0185285  | 2.5924544  | 1.8095792  |
| H | 6.1556311  | 4.7872113  | 1.9339702  |
| C | 5.3809230  | 0.8755650  | 5.0207193  |
| C | 6.1501341  | -0.2944388 | 4.7801345  |
| H | 3.7702157  | 2.1450452  | 4.3584658  |
| H | 5.5893339  | 1.4943013  | 5.9068603  |
| H | 6.9620869  | -0.5698376 | 5.4702761  |
| H | 6.4213616  | -2.0279903 | 3.5106660  |
| C | -1.7466594 | 3.7885600  | 0.5185659  |
| C | -1.3181208 | 3.2965252  | 1.7897308  |
| C | -3.0915403 | 3.6129870  | 0.1510858  |
| C | -2.2454998 | 2.6541692  | 2.6505706  |
| C | -3.5881809 | 2.5315396  | 2.2425695  |
| C | -4.0390659 | 3.0035316  | 0.9984136  |
| C | -1.8437522 | 2.1350394  | 4.0291922  |
| H | -4.3023237 | 2.0521665  | 2.9275921  |
| C | -2.2232632 | 0.6574196  | 4.2324759  |
| H | -3.3240147 | 0.5143180  | 4.2410385  |
| H | -1.8361933 | 0.2871740  | 5.2041014  |
| H | -1.7984957 | 0.0218067  | 3.4306030  |
| C | -2.4331047 | 3.0268863  | 5.1387838  |
| H | -0.7398685 | 2.2073752  | 4.1093342  |
| H | -3.5430310 | 3.0067734  | 5.1225486  |
| H | -2.1150074 | 4.0822746  | 5.0169310  |
| H | -2.1031873 | 2.6807473  | 6.1404090  |
| C | -5.4958150 | 2.9222958  | 0.5551890  |
| C | -6.3687403 | 2.0081177  | 1.4201534  |
| H | -7.3761188 | 1.9108659  | 0.9702666  |
| H | -6.4936981 | 2.4089139  | 2.4486511  |
| H | -5.9486512 | 0.9854900  | 1.4928749  |
| C | -6.1120872 | 4.3335734  | 0.4680002  |
| H | -5.4873376 | 2.4898303  | -0.4688604 |
| H | -7.1490753 | 4.2843102  | 0.0764135  |
| H | -5.5286614 | 4.9983945  | -0.1999599 |
| H | -6.1462372 | 4.8103170  | 1.4706948  |
| C | -0.8088006 | 4.5198004  | -0.4444607 |
| C | -0.8367642 | 3.9644634  | -1.8769791 |
| H | -0.0950886 | 4.5007000  | -2.5047512 |
| H | -1.8282024 | 4.0827962  | -2.3588636 |
| H | -0.5904910 | 2.8860222  | -1.8877054 |
| C | -1.1106460 | 6.0315130  | -0.4327525 |
| H | 0.2269756  | 4.3866789  | -0.0751260 |

### int3; COSMO

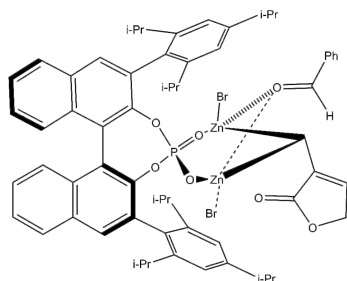

|    |            |            |            |
|----|------------|------------|------------|
| H  | -0.3961036 | 6.5815064  | -1.0800287 |
| H  | -1.0455286 | 6.4563389  | 0.5896739  |
| H  | -2.1352488 | 6.2330084  | -0.8101006 |
| H  | -0.0006348 | -5.6045105 | -2.2881014 |
| H  | 4.5061153  | -2.1064414 | -3.6750542 |
| H  | 4.0793638  | -4.7700121 | 2.1241846  |
| C  | 1.0619563  | -5.4941229 | -2.6099104 |
| H  | 2.9512072  | 0.6697383  | -3.3712154 |
| H  | 0.5555605  | -5.9815696 | -4.6766088 |
| H  | 0.6634066  | -4.2578244 | 3.6540182  |
| C  | 1.6500150  | -4.3901437 | -1.7327012 |
| C  | 4.7364304  | -1.4187373 | -2.8343423 |
| C  | 1.0753649  | -5.1822728 | -4.1107903 |
| H  | 2.1128291  | -5.1216216 | -4.5018145 |
| C  | 2.2539442  | -3.2327637 | -2.2508957 |
| C  | 3.0373119  | -4.9790299 | 2.4412755  |
| H  | 1.7198807  | -7.1320990 | -1.2784547 |
| C  | 1.6002099  | -4.5242978 | -0.3316087 |
| C  | 1.7612913  | -6.8432301 | -2.3469423 |
| H  | 1.2847615  | -7.6547472 | -2.9346949 |
| H  | 1.1023798  | -5.4070832 | 0.0977839  |
| C  | 2.4776521  | -0.2508688 | -2.9720143 |
| H  | 5.4588165  | -1.9330338 | -2.1683886 |
| H  | 5.2366705  | -0.5240201 | -3.2596138 |
| C  | 2.8052043  | -2.2360723 | -1.4199664 |
| C  | 0.6548686  | -4.1117494 | 2.5540239  |
| C  | 2.1496194  | -3.5732506 | 0.5431510  |
| H  | 3.0371390  | -5.1332037 | 3.5403257  |
| H  | 2.7314421  | -5.9346710 | 1.9657298  |
| C  | 3.4602678  | -1.0192863 | -2.0701474 |
| C  | 2.7699997  | -2.4130934 | -0.0124604 |
| C  | 2.0809177  | -3.8358592 | 2.0494523  |
| H  | 1.5731528  | 0.0463244  | -2.4064146 |
| H  | -0.0148482 | -3.2619554 | 2.3228302  |
| H  | 2.1574011  | -0.8615002 | -3.8422698 |
| H  | 0.5773311  | -4.2225190 | -4.3508680 |
| H  | 0.2148221  | -5.0221131 | 2.0988073  |
| H  | 2.8308446  | -6.7901384 | -2.6403267 |
| H  | 3.7721670  | -0.3293630 | -1.2600708 |
| H  | 2.4284962  | -2.9212130 | 2.5687858  |
| H  | 2.3093550  | -3.0896339 | -3.3399533 |
| Zn | -2.3801030 | 0.3005743  | -1.2197660 |
| Br | -3.2514029 | 1.3552355  | -3.1019067 |
| Zn | -1.6968344 | -2.2044706 | -0.1016288 |
| Br | -2.0781231 | -4.5114399 | -0.1093673 |
| H  | -3.4223263 | 3.9673437  | -0.8378675 |
| C  | -0.7247414 | -0.0567742 | -5.9960805 |
| C  | -0.8047694 | -0.4985529 | -4.6734682 |
| C  | -1.2032207 | -1.8338375 | -4.4042503 |
| C  | -1.5229403 | -2.7114830 | -5.4730498 |
| C  | -1.4495614 | -2.2572372 | -6.7920171 |
| C  | -1.0479640 | -0.9317909 | -7.0506729 |
| H  | -0.4157969 | 0.9766922  | -6.2108113 |
| C  | -1.2945419 | -2.3263780 | -3.0487302 |
| H  | -1.8318626 | -3.7456383 | -5.2536200 |
| H  | -1.7014413 | -2.9306219 | -7.6244404 |
| H  | -0.9851327 | -0.5764721 | -8.0908471 |
| O  | -1.1532137 | -1.5987411 | -2.0324708 |
| H  | -0.5569756 | 0.1681793  | -3.8371131 |
| H  | -1.4981622 | -3.4141110 | -2.8950904 |
| C  | -4.5707239 | -2.6404662 | -2.0461797 |
| C  | -4.5838136 | -1.5258212 | -1.2700392 |
| C  | -5.7711547 | -0.7150445 | -1.6921913 |
| O  | -6.3930182 | -1.3588143 | -2.7330191 |
| C  | -5.7034730 | -2.5778151 | -3.0198674 |
| O  | -6.1963741 | 0.3194842  | -1.2212909 |
| C  | -3.6722975 | -1.0402617 | -0.2011531 |
| H  | -5.3527845 | -2.5552977 | -4.0775069 |
| H  | -6.4146344 | -3.4289014 | -2.9230898 |
| H  | -3.6212100 | -1.7741549 | 0.6417470  |
| H  | -4.1162481 | -0.1527603 | 0.3072140  |

H -3.8738825 -3.4880977 -1.9784963

### int3

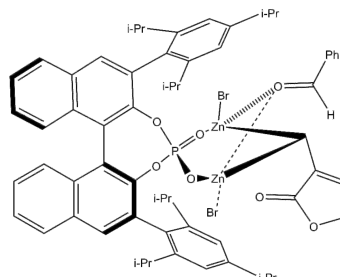

Energy (Hartree) = -11970.01264741

|   |            |            |            |
|---|------------|------------|------------|
| C | 0.9003844  | 2.1463183  | 2.0844295  |
| C | 2.2982475  | 2.1110708  | 2.1077097  |
| C | 2.9999621  | 3.3744899  | 2.1325354  |
| C | 4.4149100  | 3.4823248  | 1.9791472  |
| C | 2.2382496  | 4.5919222  | 2.2839239  |
| C | 2.9259487  | 5.8401755  | 2.3618607  |
| C | 0.8148993  | 4.5403136  | 2.2707128  |
| H | 0.2490780  | 5.4829316  | 2.3233268  |
| C | 0.1252867  | 3.3463292  | 2.0970143  |
| C | 3.3209658  | -1.4012584 | 0.9192353  |
| C | 4.4112842  | -1.6580879 | 1.7427074  |
| H | 4.9613729  | -2.6039011 | 1.6225496  |
| C | 4.7849831  | -0.7745541 | 2.7942811  |
| C | 5.8402546  | -1.1079510 | 3.6958569  |
| C | 4.0431800  | 0.4471676  | 2.9956837  |
| C | 4.3468748  | 1.2362800  | 4.1459598  |
| C | 3.0085280  | 0.8026961  | 2.0522886  |
| C | 2.6646120  | -0.1426036 | 1.0768021  |
| O | 0.1924452  | 0.9431704  | 2.0631773  |
| O | 1.6523559  | 0.1465504  | 0.1616785  |
| P | 0.0906473  | 0.1289121  | 0.6522068  |
| O | -0.6809678 | 0.8760711  | -0.4469121 |
| O | -0.4255771 | -1.2718182 | 1.0374889  |
| C | 4.3062470  | 5.9038915  | 2.2511032  |
| C | 5.0514895  | 4.7144334  | 2.0377742  |
| H | 2.3313081  | 6.7582874  | 2.4901540  |
| H | 4.8226647  | 6.8742625  | 2.3059586  |
| H | 5.0054301  | 2.5730403  | 1.8037172  |
| H | 6.1435643  | 4.7682940  | 1.9113684  |
| C | 5.3648537  | 0.8728123  | 5.0164465  |
| C | 6.1331482  | -0.2984462 | 4.7822328  |
| H | 3.7551883  | 2.1398799  | 4.3458909  |
| H | 5.5729709  | 1.4957801  | 5.8996158  |
| H | 6.9441651  | -0.5714134 | 5.4743558  |
| H | 6.4046093  | -2.0373857 | 3.5210834  |
| C | -1.7602228 | 3.7629178  | 0.4893065  |
| C | -1.3313202 | 3.2825365  | 1.7647232  |
| C | -3.1093189 | 3.6011596  | 0.1319439  |
| C | -2.2613447 | 2.6607597  | 2.6370775  |
| C | -3.6084534 | 2.5552701  | 2.2397709  |
| C | -4.0619666 | 3.0219858  | 0.9947482  |
| C | -1.8580158 | 2.1483171  | 4.0177803  |
| H | -4.3260389 | 2.0974495  | 2.9357264  |
| C | -2.2447514 | 0.6738869  | 4.2298937  |
| H | -3.3461519 | 0.5358309  | 4.2365893  |
| H | -1.8620999 | 0.3072423  | 5.2045550  |
| H | -1.8200152 | 0.0308148  | 3.4341460  |
| C | -2.4381256 | 3.0497664  | 5.1241549  |



|    |            |            |            |   |            |            |            |
|----|------------|------------|------------|---|------------|------------|------------|
| H  | -0.7534425 | 2.2141741  | 4.0938535  | C | -1.3024159 | -2.1547780 | -6.8114649 |
| H  | -3.5480551 | 3.0369542  | 5.1124194  | C | -0.9579975 | -0.8063502 | -7.0289902 |
| H  | -2.1150245 | 4.1024949  | 4.9944439  | H | -0.4439902 | 1.1093529  | -6.1270441 |
| H  | -2.1070051 | 2.7083080  | 6.1269517  | C | -1.2431532 | -2.3019404 | -3.0637297 |
| C  | -5.5250831 | 2.9696101  | 0.5689052  | H | -1.6566398 | -3.6946973 | -5.3173999 |
| C  | -6.4144181 | 2.1106536  | 1.4723317  | H | -1.5009324 | -2.8188787 | -7.6655982 |
| H  | -7.4293674 | 2.0304161  | 1.0369417  | H | -0.8867917 | -0.4233409 | -8.0588345 |
| H  | -6.5137794 | 2.5472153  | 2.4891142  | O | -1.1451432 | -1.5874274 | -2.0368477 |
| H  | -6.0268470 | 1.0776434  | 1.5681835  | H | -0.6025012 | 0.2360020  | -3.7787414 |
| C  | -6.1004194 | 4.3951931  | 0.4440127  | H | -1.4243341 | -3.3972151 | -2.9302279 |
| H  | -5.5420378 | 2.5047708  | -0.4407531 | C | -4.6337248 | -2.6492319 | -1.9732467 |
| H  | -7.1429110 | 4.3636760  | 0.0660149  | C | -4.6200536 | -1.5524376 | -1.1743297 |
| H  | -5.5072841 | 5.0222746  | -0.2510944 | C | -5.8283606 | -0.7363795 | -1.5274983 |
| H  | -6.1082911 | 4.9045824  | 1.4309549  | O | -6.4947689 | -1.3652614 | -2.5511515 |
| C  | -0.8190617 | 4.4718498  | -0.4874706 | C | -5.8107274 | -2.5685643 | -2.8944845 |
| C  | -0.8546796 | 3.8956137  | -1.9117068 | O | -6.2284321 | 0.2867333  | -1.0168694 |
| H  | -0.1174290 | 4.4233925  | -2.5516998 | C | -3.6693944 | -1.0812832 | -0.1327116 |
| H  | -1.8486528 | 4.0035583  | -2.3904886 | H | -5.5048805 | -2.5182948 | -3.9656635 |
| H  | -0.6048044 | 2.8180716  | -1.9070907 | H | -6.5110783 | -3.4286250 | -2.7893372 |
| C  | -1.1101554 | 5.9856070  | -0.4983268 | H | -3.5995527 | -1.8193883 | 0.7054174  |
| H  | 0.2168817  | 4.3370096  | -0.1190025 | H | -4.0935046 | -0.1929994 | 0.3928939  |
| H  | -0.3925460 | 6.5215297  | -1.1538805 | H | -3.9252356 | -3.4902039 | -1.9549227 |
| H  | -1.0424396 | 6.4252746  | 0.5175275  |   |            |            |            |
| H  | -2.1335364 | 6.1892575  | -0.8772874 |   |            |            |            |
| H  | 0.0556838  | -5.6549085 | -2.3109342 |   |            |            |            |
| H  | 4.5288528  | -2.1018026 | -3.6684091 |   |            |            |            |
| H  | 4.0735905  | -4.7883202 | 2.1284903  |   |            |            |            |
| C  | 1.1169063  | -5.5258849 | -2.6300216 |   |            |            |            |
| H  | 2.9517613  | 0.6621021  | -3.3640698 |   |            |            |            |
| H  | 0.6218131  | -6.0128390 | -4.7004658 |   |            |            |            |
| H  | 0.6415801  | -4.2986350 | 3.6269827  |   |            |            |            |
| C  | 1.6840654  | -4.4151554 | -1.7481272 |   |            |            |            |
| C  | 4.7487118  | -1.4153385 | -2.8240092 |   |            |            |            |
| C  | 1.1285165  | -5.2085126 | -4.1296479 |   |            |            |            |
| H  | 2.1654355  | -5.1320550 | -4.5192682 |   |            |            |            |
| C  | 2.2810496  | -3.2515924 | -2.2596974 |   |            |            |            |
| C  | 3.0296503  | -5.0009569 | 2.4366230  |   |            |            |            |
| H  | 1.8025198  | -7.1544983 | -1.3025871 |   |            |            |            |
| C  | 1.6213127  | -4.5507876 | -0.3481942 |   |            |            |            |
| C  | 1.8397569  | -6.8629659 | -2.3703068 |   |            |            |            |
| H  | 1.3792252  | -7.6822502 | -2.9600797 |   |            |            |            |
| H  | 1.1254103  | -5.4374751 | 0.0752853  |   |            |            |            |
| C  | 2.4822525  | -0.2621846 | -2.9686529 |   |            |            |            |
| H  | 5.4704387  | -1.9276483 | -2.1561697 |   |            |            |            |
| H  | 5.2457964  | -0.5161452 | -3.2434234 |   |            |            |            |
| C  | 2.8155480  | -2.2510774 | -1.4227804 |   |            |            |            |
| C  | 0.6424230  | -4.1442865 | 2.5282141  |   |            |            |            |
| C  | 2.1539301  | -3.5963057 | 0.5326233  |   |            |            |            |
| H  | 3.0208385  | -5.1567319 | 3.5353126  |   |            |            |            |
| H  | 2.7327005  | -5.9575160 | 1.9576267  |   |            |            |            |
| C  | 3.4658032  | -1.0276619 | -2.0654934 |   |            |            |            |
| C  | 2.7696637  | -2.4306828 | -0.0160893 |   |            |            |            |
| C  | 2.0721032  | -3.8612848 | 2.0378251  |   |            |            |            |
| H  | 1.5750868  | 0.0295104  | -2.4047651 |   |            |            |            |
| H  | -0.0267006 | -3.2936330 | 2.2996255  |   |            |            |            |
| H  | 2.1676644  | -0.8717621 | -3.8418497 |   |            |            |            |
| H  | 0.6187316  | -4.2540007 | -4.3661598 |   |            |            |            |
| H  | 0.2065326  | -5.0514074 | 2.0628543  |   |            |            |            |
| H  | 2.9087388  | -6.7900463 | -2.6608505 |   |            |            |            |
| H  | 3.7683973  | -0.3383764 | -1.2514394 |   |            |            |            |
| H  | 2.4108217  | -2.9459036 | 2.5618012  |   |            |            |            |
| H  | 2.3469631  | -3.1074407 | -3.3480893 |   |            |            |            |
| Zn | -2.4190704 | 0.2857558  | -1.1801603 |   |            |            |            |
| Br | -3.3298491 | 1.2952581  | -3.0621650 |   |            |            |            |
| Zn | -1.6966555 | -2.2283108 | -0.1122757 |   |            |            |            |
| Br | -2.0410546 | -4.5366722 | -0.2071017 |   |            |            |            |
| H  | -3.4409306 | 3.9467238  | -0.8597838 |   |            |            |            |
| C  | -0.7046585 | 0.0562355  | -5.9466817 |   |            |            |            |
| C  | -0.7951212 | -0.4211157 | -4.6368631 |   |            |            |            |
| C  | -1.1366508 | -1.7790917 | -4.4091771 |   |            |            |            |
| C  | -1.3893716 | -2.6428625 | -5.5055641 |   |            |            |            |

#### int4; COSMO

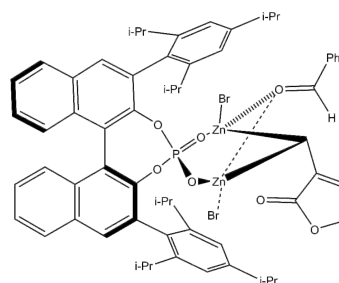

Energy (Hartree) = -11970.02947057

|   |            |            |            |
|---|------------|------------|------------|
| C | 0.8316463  | 2.0444264  | 1.8688302  |
| C | 2.2295684  | 2.0936183  | 1.9287999  |
| C | 2.8538977  | 3.3943772  | 1.9881785  |
| C | 4.2645918  | 3.5851077  | 1.8801607  |
| C | 2.0174081  | 4.5634214  | 2.1284742  |
| C | 2.6278422  | 5.8495251  | 2.2372828  |
| C | 0.5999952  | 4.4282497  | 2.0791987  |
| H | -0.0200852 | 5.3360571  | 2.1323489  |
| C | -0.0136821 | 3.1969427  | 1.8794030  |
| C | 3.4142678  | -1.3815536 | 0.7801348  |
| C | 4.4737870  | -1.6122283 | 1.6494800  |
| H | 5.0450920  | -2.5489092 | 1.5652101  |
| C | 4.7924722  | -0.7081481 | 2.7032261  |
| C | 5.8217439  | -1.0128738 | 3.6446204  |
| C | 4.0164586  | 0.4982070  | 2.8704310  |
| C | 4.2577191  | 1.2980456  | 4.0283137  |
| C | 3.0110232  | 0.8244905  | 1.8859228  |
| C | 2.7424824  | -0.1252182 | 0.8923800  |
| O | 0.2038852  | 0.8015894  | 1.8055749  |
| O | 1.7708881  | 0.1542188  | -0.0720120 |
| P | 0.2004841  | 0.0136969  | 0.3662603  |
| O | -0.5987668 | 0.7690745  | -0.7124228 |
| O | -0.2137349 | -1.4282304 | 0.6916548  |
| C | 4.0052576  | 5.9942455  | 2.1676604  |
| C | 4.8258101  | 4.8519602  | 1.9680977  |
| H | 1.9775289  | 6.7303018  | 2.3573506  |
| H | 4.4624743  | 6.9923752  | 2.2460673  |
| H | 4.9123764  | 2.7129442  | 1.7169466  |
| H | 5.9162678  | 4.9713000  | 1.8768518  |
| C | 5.2516265  | 0.9622940  | 4.9376855  |
| C | 6.0557741  | -0.1914694 | 4.7371163  |

|   |            |            |            |    |            |            |            |
|---|------------|------------|------------|----|------------|------------|------------|
| H | 3.6380492  | 2.1878845  | 4.2040517  | H  | -0.1403940 | -3.4362117 | 1.9908408  |
| H | 5.4124703  | 1.5934527  | 5.8249965  | H  | 2.5771170  | -0.9122420 | -4.0310942 |
| H | 6.8471678  | -0.4421198 | 5.4598354  | H  | 0.8279140  | -4.1858005 | -4.5665775 |
| H | 6.4135247  | -1.9297475 | 3.4960307  | H  | 0.3112213  | -5.1661235 | 1.9132329  |
| C | -1.9117724 | 3.5314489  | 0.2633052  | H  | 2.8442344  | -6.8447136 | -2.7125538 |
| C | -1.4638528 | 3.0591408  | 1.5319626  | H  | 4.0709611  | -0.4272031 | -1.3662857 |
| C | -3.2574701 | 3.3275648  | -0.1017825 | H  | 2.2492608  | -2.8062931 | 2.3969612  |
| C | -2.3778770 | 2.3975993  | 2.3965891  | H  | 2.5827358  | -3.1452516 | -3.4935788 |
| C | -3.7141307 | 2.2298735  | 1.9853736  | Zn | -2.4515614 | 0.1643035  | -1.1380693 |
| C | -4.1850215 | 2.6775004  | 0.7341095  | Br | -3.7048132 | 0.8720130  | -2.9626473 |
| C | -1.9711116 | 1.8945589  | 3.7805376  | Zn | -1.7702036 | -2.3192490 | -0.1964417 |
| H | -4.4057220 | 1.7056599  | 2.6596938  | Br | -2.2703821 | -4.5733741 | -0.4479882 |
| C | -2.2220821 | 0.3845751  | 3.9522088  | H  | -3.5844191 | 3.6896598  | -1.0849715 |
| H | -3.2921924 | 0.1230636  | 3.8176346  | C  | -0.1501249 | 0.6691352  | -5.5098690 |
| H | -1.9197206 | 0.0562437  | 4.9679340  | C  | -0.4927410 | -0.0386200 | -4.3569010 |
| H | -1.6292732 | -0.1978896 | 3.2200742  | C  | -0.7687290 | -1.4281058 | -4.4417745 |
| C | -2.6754045 | 2.7108734  | 4.8812774  | C  | -0.7025219 | -2.0921214 | -5.6922222 |
| H | -0.8809319 | 2.0665385  | 3.8953815  | C  | -0.3634624 | -1.3743345 | -6.8433468 |
| H | -3.7759875 | 2.5723393  | 4.8423445  | C  | -0.0859752 | 0.0029146  | -6.7496306 |
| H | -2.4681429 | 3.7950946  | 4.7739132  | H  | 0.0693531  | 1.7453434  | -5.4485771 |
| H | -2.3314881 | 2.3914907  | 5.8868126  | C  | -1.1175268 | -2.1768163 | -3.2510261 |
| C | -5.6291112 | 2.4176911  | 0.2942922  | H  | -0.9281513 | -3.1682125 | -5.7511760 |
| C | -6.6354310 | 2.5384647  | 1.4522790  | H  | -0.3138077 | -1.8827880 | -7.8174401 |
| H | -7.6641884 | 2.3506960  | 1.0833702  | H  | 0.1854196  | 0.5655457  | -7.6562786 |
| H | -6.6102917 | 3.5570333  | 1.8934827  | O  | -1.2998465 | -1.6306905 | -2.1409190 |
| H | -6.4435043 | 1.8028533  | 2.2564565  | H  | -0.5390725 | 0.4574241  | -3.3775833 |
| C | -6.0694138 | 3.2760900  | -0.9001634 | H  | -1.2317269 | -3.2857140 | -3.3259540 |
| H | -5.6512453 | 1.3572609  | -0.0556600 | C  | -5.3248648 | -1.8481320 | -0.7958618 |
| H | -7.1244278 | 3.0543788  | -1.1584471 | C  | -4.7102690 | -1.2924517 | 0.2735192  |
| H | -5.4614720 | 3.0726924  | -1.8033165 | C  | -5.7503415 | -1.0732297 | 1.3223036  |
| H | -5.9986473 | 4.3592263  | -0.6652819 | O  | -6.9623790 | -1.4916509 | 0.8265704  |
| C | -1.0007915 | 4.2738210  | -0.7173042 | C  | -6.7817249 | -1.9995101 | -0.5015213 |
| C | -1.0488214 | 3.7101854  | -2.1482622 | O  | -5.6315694 | -0.6013823 | 2.4383826  |
| H | -0.3377646 | 4.2632402  | -2.7963499 | C  | -3.2892465 | -0.9066203 | 0.4968638  |
| H | -2.0545636 | 3.7992077  | -2.6070528 | H  | -7.4206313 | -1.4169088 | -1.2029900 |
| H | -0.7672596 | 2.6406049  | -2.1554944 | H  | -7.1244434 | -3.0579282 | -0.5363746 |
| C | -1.3250367 | 5.7808880  | -0.7110264 | H  | -2.9143187 | -1.4325861 | 1.4121050  |
| H | 0.0430166  | 4.1553104  | -0.3650832 | H  | -3.2634184 | 0.1235595  | 0.9421905  |
| H | -0.6294641 | 6.3365798  | -1.3737108 | H  | -4.8608435 | -2.1374566 | -1.7489016 |
| H | -1.2488065 | 6.2137745  | 0.3068604  |    |            |            |            |
| H | -2.3584980 | 5.9648408  | -1.0727014 |    |            |            |            |
| H | 0.0676338  | -5.5040710 | -2.5183722 |    |            |            |            |
| H | 4.8545467  | -2.2801734 | -3.7084672 |    |            |            |            |
| H | 4.0932533  | -4.5149214 | 2.1181798  |    |            |            |            |
| C | 1.1485748  | -5.4556221 | -2.7904355 |    |            |            |            |
| H | 3.4442501  | 0.5752366  | -3.5481848 |    |            |            |            |
| H | 0.7093699  | -5.9460952 | -4.8722703 |    |            |            |            |
| H | 0.5585013  | -4.2516499 | 3.4271237  |    |            |            |            |
| C | 1.7539370  | -4.3689987 | -1.9033275 |    |            |            |            |
| C | 5.0704196  | -1.5920375 | -2.8642337 |    |            |            |            |
| C | 1.2516045  | -5.1718624 | -4.2930275 |    |            |            |            |
| H | 2.3079621  | -5.1811640 | -4.6350397 |    |            |            |            |
| C | 2.4561695  | -3.2617283 | -2.4072258 |    |            |            |            |
| C | 3.0551907  | -4.8066999 | 2.3736862  |    |            |            |            |
| H | 1.6497439  | -7.1019053 | -1.4034534 |    |            |            |            |
| C | 1.6189241  | -4.4726668 | -0.5048434 |    |            |            |            |
| C | 1.7600637  | -6.8352290 | -2.4727397 |    |            |            |            |
| H | 1.2695947  | -7.6303331 | -3.0713652 |    |            |            |            |
| H | 1.0444467  | -5.3155986 | -0.0922371 |    |            |            |            |
| C | 2.8925925  | -0.3046898 | -3.1571108 |    |            |            |            |
| H | 5.7205080  | -2.1340637 | -2.1477026 |    |            |            |            |
| H | 5.6450497  | -0.7332351 | -3.2692537 |    |            |            |            |
| C | 3.0152253  | -2.2806787 | -1.5618592 |    |            |            |            |
| C | 0.6087628  | -4.1786827 | 2.3213455  |    |            |            |            |
| C | 2.1746275  | -3.5385145 | 0.3829415  |    |            |            |            |
| H | 2.9966533  | -4.9366712 | 3.4743478  |    |            |            |            |
| H | 2.8633359  | -5.7939739 | 1.9030948  |    |            |            |            |
| C | 3.7732029  | -1.1115578 | -2.1871597 |    |            |            |            |
| C | 2.8875186  | -2.4244372 | -0.1574887 |    |            |            |            |
| C | 2.0252137  | -3.7660384 | 1.8887340  |    |            |            |            |
| H | 1.9805471  | 0.0614605  | -2.6476298 |    |            |            |            |

int4

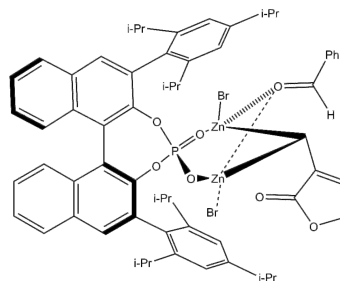

Energy (Hartree) = -11970.01665748

|   |            |            |           |
|---|------------|------------|-----------|
| C | 0.8340462  | 2.0446712  | 1.8873036 |
| C | 2.2319329  | 2.0931481  | 1.9487877 |
| C | 2.8569860  | 3.3934669  | 2.0072142 |
| C | 4.2680342  | 3.5829696  | 1.9047601 |
| C | 2.0210036  | 4.5635759  | 2.1405749 |
| C | 2.6326150  | 5.8486594  | 2.2484874 |
| C | 0.6039721  | 4.4291721  | 2.0846445 |
| H | -0.0165118 | 5.3372118  | 2.1290255 |
| C | -0.0104336 | 3.1979882  | 1.8880542 |
| C | 3.4102369  | -1.3801087 | 0.7890850 |
| C | 4.4687013  | -1.6157087 | 1.6581694 |
| H | 5.0366213  | -2.5541030 | 1.5702084 |
| C | 4.7899228  | -0.7161217 | 2.7146120 |
| C | 5.8183176  | -1.0251347 | 3.6548550 |
| C | 4.0173149  | 0.4917650  | 2.8852000 |
| C | 4.2618529  | 1.2884249  | 4.0442670 |

|   |            |            |            |    |            |            |            |
|---|------------|------------|------------|----|------------|------------|------------|
| C | 3.0118150  | 0.8230165  | 1.9028738  | C  | 1.7832251  | -6.8188521 | -2.4963539 |
| C | 2.7407436  | -0.1229749 | 0.9062728  | H  | 1.2982828  | -7.6150578 | -3.0980116 |
| O | 0.2059893  | 0.8024529  | 1.8279170  | H  | 1.0486827  | -5.3139839 | -0.1080001 |
| O | 1.7680127  | 0.1599280  | -0.0548078 | C  | 2.8732276  | -0.2790667 | -3.1397719 |
| P | 0.1991070  | 0.0155547  | 0.3885767  | H  | 5.7134146  | -2.0988282 | -2.1475207 |
| O | -0.6042937 | 0.7709250  | -0.6867779 | H  | 5.6288329  | -0.6918517 | -3.2604916 |
| O | -0.2112370 | -1.4277246 | 0.7118959  | C  | 3.0102642  | -2.2647032 | -1.5579453 |
| C | 4.0099364  | 5.9922004  | 2.1852845  | C  | 0.6064674  | -4.1885045 | 2.3112601  |
| C | 4.8298998  | 4.8490685  | 1.9926307  | C  | 2.1748414  | -3.5377005 | 0.3787127  |
| H | 1.9824445  | 6.7302786  | 2.3629712  | H  | 2.9932564  | -4.9626494 | 3.4584466  |
| H | 4.4674503  | 6.9901534  | 2.2634832  | H  | 2.8575412  | -5.8067288 | 1.8806121  |
| H | 4.9148634  | 2.7092301  | 1.7470463  | C  | 3.7606823  | -1.0874102 | -2.1771381 |
| H | 5.9208970  | 4.9668553  | 1.9065319  | C  | 2.8841140  | -2.4179624 | -0.1544722 |
| C | 5.2555215  | 0.9483791  | 4.9516012  | C  | 2.0243467  | -3.7763482 | 1.8826485  |
| C | 6.0556759  | -0.2070140 | 4.7484143  | H  | 1.9606672  | 0.0788256  | -2.6254064 |
| H | 3.6444296  | 2.1795640  | 4.2208107  | H  | -0.1391335 | -3.4381370 | 1.9913512  |
| H | 5.4189368  | 1.5775416  | 5.8397888  | H  | 2.5599737  | -0.8821860 | -4.0177056 |
| H | 6.8467662  | -0.4616920 | 5.4699707  | H  | 0.8326722  | -4.1625590 | -4.5723408 |
| H | 6.4070942  | -1.9435749 | 3.5040861  | H  | 0.3024386  | -5.1690624 | 1.8918383  |
| C | -1.8958429 | 3.5178475  | 0.2546746  | H  | 2.8671170  | -6.8186589 | -2.7367677 |
| C | -1.4582842 | 3.0589739  | 1.5315994  | H  | 4.0558631  | -0.4064894 | -1.3525956 |
| C | -3.2379248 | 3.3076499  | -0.1198084 | H  | 2.2508304  | -2.8214760 | 2.3988337  |
| C | -2.3789733 | 2.4057138  | 2.3952288  | H  | 2.5844253  | -3.1204049 | -3.4946150 |
| C | -3.7122680 | 2.2348281  | 1.9763108  | Zn | -2.4646466 | 0.1807385  | -1.0937063 |
| C | -4.1729544 | 2.6687576  | 0.7165848  | Br | -3.6990793 | 0.8246046  | -2.9501428 |
| C | -1.9823052 | 1.9150638  | 3.7864625  | Zn | -1.7534821 | -2.3186061 | -0.2035052 |
| H | -4.4098678 | 1.7194280  | 2.6511165  | Br | -2.2530097 | -4.5608121 | -0.5234885 |
| C | -2.2347997 | 0.4066519  | 3.9692155  | H  | -3.5576391 | 3.6595714  | -1.1090247 |
| H | -3.3036468 | 0.1433481  | 3.8284935  | C  | -0.2058062 | 0.6584595  | -5.5463686 |
| H | -1.9409252 | 0.0871690  | 4.9901815  | C  | -0.5189540 | -0.0431257 | -4.3809191 |
| H | -1.6342060 | -0.1819150 | 3.2484860  | C  | -0.7830486 | -1.4349497 | -4.4495248 |
| C | -2.6950558 | 2.7413033  | 4.8741089  | C  | -0.7369500 | -2.1072987 | -5.6952570 |
| H | -0.8928907 | 2.0883671  | 3.9074560  | C  | -0.4264044 | -1.3963527 | -6.8585316 |
| H | -3.7950844 | 2.6021904  | 4.8280916  | C  | -0.1593737 | -0.0163512 | -6.7812514 |
| H | -2.4877871 | 3.8245204  | 4.7583344  | H  | 0.0013224  | 1.7376120  | -5.4956642 |
| H | -2.3592769 | 2.4315940  | 5.8853493  | C  | -1.1074400 | -2.1727331 | -3.2421111 |
| C | -5.6164035 | 2.4136657  | 0.2718287  | H  | -0.9526550 | -3.1862052 | -5.7401939 |
| C | -6.6267858 | 2.5551493  | 1.4238611  | H  | -0.3913944 | -1.9121265 | -7.8294910 |
| H | -7.6558164 | 2.3766258  | 1.0514190  | H  | 0.0883850  | 0.5412059  | -7.6978626 |
| H | -6.5918943 | 3.5769110  | 1.8566231  | O  | -1.2558553 | -1.6125667 | -2.1371356 |
| H | -6.4488389 | 1.8229960  | 2.2342032  | H  | -0.5563125 | 0.4600965  | -3.4049845 |
| C | -6.0434987 | 3.2623379  | -0.9343063 | H  | -1.2362094 | -3.2820639 | -3.3018031 |
| H | -5.6455394 | 1.3497722  | -0.0668676 | C  | -5.3120217 | -1.8782584 | -0.7582937 |
| H | -7.0993809 | 3.0477110  | -1.1947206 | C  | -4.7015061 | -1.3039782 | 0.3024420  |
| H | -5.4347520 | 3.0429695  | -1.8331264 | C  | -5.7480689 | -1.0479973 | 1.3392739  |
| H | -5.9646912 | 4.3472922  | -0.7109877 | O  | -6.9612953 | -1.4675831 | 0.8414221  |
| C | -0.9789842 | 4.2546475  | -0.7248179 | C  | -6.7738503 | -2.0066884 | -0.4696848 |
| C | -1.0103360 | 3.6779091  | -2.1511709 | O  | -5.6304425 | -0.5490258 | 2.4410531  |
| H | -0.3029344 | 4.2352979  | -2.7996516 | C  | -3.2790472 | -0.9269829 | 0.5288983  |
| H | -2.0139219 | 3.7475406  | -2.6179135 | H  | -7.3992756 | -1.4332070 | -1.1915538 |
| H | -0.7127430 | 2.6127569  | -2.1457219 | H  | -7.1283384 | -3.0623904 | -0.4848199 |
| C | -1.3111134 | 5.7598849  | -0.7349305 | H  | -2.8993314 | -1.4792981 | 1.4268602  |
| H | 0.0621871  | 4.1450896  | -0.3620054 | H  | -3.2497983 | 0.0908313  | 1.0011892  |
| H | -0.6119955 | 6.3145490  | -1.3947105 | H  | -4.8406322 | -2.1929721 | -1.6994503 |
| H | -1.2484032 | 6.2015286  | 0.2800313  |    |            |            |            |
| H | -2.3418068 | 5.9359452  | -1.1078016 |    |            |            |            |
| H | 0.0805417  | -5.5001085 | -2.5308544 |    |            |            |            |
| H | 4.8469117  | -2.2406412 | -3.7070789 |    |            |            |            |
| H | 4.0901900  | -4.5334890 | 2.1050394  |    |            |            |            |
| C | 1.1606512  | -5.4422990 | -2.8045196 |    |            |            |            |
| H | 3.4186395  | 0.6068980  | -3.5258918 |    |            |            |            |
| H | 0.7217331  | -5.9224432 | -4.8895877 |    |            |            |            |
| H | 0.5559719  | -4.2744514 | 3.4159599  |    |            |            |            |
| C | 1.7593952  | -4.3565663 | -1.9121974 |    |            |            |            |
| C | 5.0593519  | -1.5558691 | -2.8593743 |    |            |            |            |
| C | 1.2601083  | -5.1489293 | -4.3055142 |    |            |            |            |
| H | 2.3158837  | -5.1514229 | -4.6493927 |    |            |            |            |
| C | 2.4565786  | -3.2433961 | -2.4091021 |    |            |            |            |
| C | 3.0513422  | -4.8237429 | 2.3589482  |    |            |            |            |
| H | 1.6768743  | -7.0920606 | -1.4285446 |    |            |            |            |
| C | 1.6225745  | -4.4679472 | -0.5149277 |    |            |            |            |

### int5; COSMO

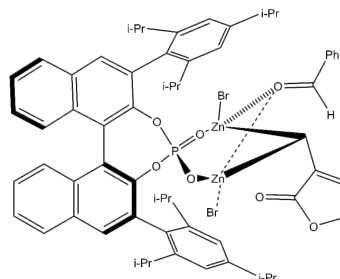

Energy (Hartree) = -11970.02929516

|   |           |           |           |
|---|-----------|-----------|-----------|
| C | 0.8216009 | 2.1065855 | 1.9013754 |
| C | 2.2169581 | 2.1233625 | 2.0136084 |
| C | 2.8644627 | 3.4104248 | 2.1124849 |

|   |            |            |            |    |            |            |            |
|---|------------|------------|------------|----|------------|------------|------------|
| C | 4.2815983  | 3.5726104  | 2.0548608  | H  | 3.8948823  | -4.5233614 | 2.2758802  |
| C | 2.0477504  | 4.5948715  | 2.2417255  | C  | 1.1177521  | -5.3995474 | -2.7469753 |
| C | 2.6808540  | 5.8661256  | 2.3886593  | H  | 3.5637038  | 0.5761297  | -3.4252107 |
| C | 0.6295771  | 4.4908033  | 2.1475686  | H  | 0.7451256  | -5.8827440 | -4.8433877 |
| H | 0.0270795  | 5.4104362  | 2.1989256  | H  | 0.3162826  | -4.1557505 | 3.4380048  |
| C | -0.0008439 | 3.2753829  | 1.9090270  | C  | 1.7166435  | -4.3267936 | -1.8389240 |
| C | 3.3573168  | -1.3798467 | 0.9014791  | C  | 5.1255486  | -1.6229018 | -2.6894748 |
| C | 4.3761774  | -1.6389720 | 1.8103398  | C  | 1.2849698  | -5.1214440 | -4.2448914 |
| H | 4.9243930  | -2.5909923 | 1.7476130  | H  | 2.3530137  | -5.1598711 | -4.5461861 |
| C | 4.6786257  | -0.7432792 | 2.8760750  | C  | 2.4630944  | -3.2377745 | -2.3180105 |
| C | 5.6627291  | -1.0760992 | 3.8554530  | C  | 2.8396448  | -4.7863902 | 2.4887459  |
| C | 3.9289404  | 0.4832461  | 3.0157581  | H  | 1.5236388  | -7.0548058 | -1.3398348 |
| C | 4.1462335  | 1.2742588  | 4.1843702  | C  | 1.5273051  | -4.4236379 | -0.4463184 |
| C | 2.9709553  | 0.8368504  | 1.9935742  | C  | 1.6812992  | -6.7935587 | -2.4044957 |
| C | 2.7172251  | -0.1052883 | 0.9890820  | H  | 1.1936910  | -7.5772377 | -3.0202758 |
| O | 0.1668778  | 0.8824034  | 1.7937626  | H  | 0.9153833  | -5.2497496 | -0.0540425 |
| O | 1.7950087  | 0.2002980  | -0.0141835 | C  | 2.9836420  | -0.2941544 | -3.0540775 |
| P | 0.2038048  | 0.1028846  | 0.3512074  | H  | 5.7415551  | -2.1761256 | -1.9517291 |
| O | -0.5166360 | 0.8812398  | -0.7656230 | H  | 5.7295744  | -0.7761166 | -3.0767118 |
| O | -0.2696087 | -1.3244843 | 0.6584318  | C  | 3.0149954  | -2.2690490 | -1.4541731 |
| C | 4.0625520  | 5.9826397  | 2.3665479  | C  | 0.4150812  | -4.0932207 | 2.3349560  |
| C | 4.8656372  | 4.8260544  | 2.1787586  | C  | 2.0741398  | -3.5022833 | 0.4602269  |
| H | 2.0453804  | 6.7588155  | 2.4998295  | H  | 2.7319364  | -4.9111302 | 3.5862785  |
| H | 4.5373310  | 6.9698139  | 2.4737990  | H  | 2.6408078  | -5.7697614 | 2.0129309  |
| H | 4.9159171  | 2.6887526  | 1.9017294  | C  | 3.8167917  | -1.1164456 | -2.0549497 |
| H | 5.9607630  | 4.9235654  | 2.1255333  | C  | 2.8357837  | -2.4084919 | -0.0548717 |
| C | 5.0953596  | 0.9112542  | 5.1304147  | C  | 1.8587108  | -3.7203783 | 1.9593863  |
| C | 5.8763727  | -0.2626514 | 4.9579958  | H  | 2.0609157  | 0.0872554  | -2.5755808 |
| H | 3.5435729  | 2.1794362  | 4.3393281  | H  | -0.3015547 | -3.3359789 | 1.9680205  |
| H | 5.2380494  | 1.5365441  | 6.0249679  | H  | 2.6888358  | -0.8966451 | -3.9387320 |
| H | 6.6325922  | -0.5350639 | 5.7099066  | H  | 0.8979661  | -4.1254787 | -4.5362031 |
| H | 6.2351470  | -2.0082596 | 3.7276319  | H  | 0.1097102  | -5.0762877 | 1.9221412  |
| C | -1.8488385 | 3.6287509  | 0.2364305  | H  | 2.7732233  | -6.8312829 | -2.6030030 |
| C | -1.4442193 | 3.1593145  | 1.5245600  | H  | 4.1012096  | -0.4366681 | -1.2256560 |
| C | -3.1754978 | 3.4084464  | -0.1741026 | H  | 2.0880557  | -2.7651226 | 2.4737952  |
| C | -2.3831527 | 2.5059307  | 2.3645960  | H  | 2.6302491  | -3.1257988 | -3.3993123 |
| C | -3.7121336 | 2.3505495  | 1.9194188  | Zn | -2.3190576 | 0.3163176  | -1.3823661 |
| C | -4.1317741 | 2.7775151  | 0.6485145  | Br | -3.4260748 | 1.1685718  | -3.2470576 |
| C | -2.0122487 | 1.9746565  | 3.7473584  | Zn | -1.8086561 | -2.1621018 | -0.2883006 |
| H | -4.4293088 | 1.8519045  | 2.5870491  | Br | -2.3675021 | -4.3999361 | -0.5420761 |
| C | -2.2806721 | 0.4631479  | 3.8778999  | H  | -3.4795819 | 3.7362807  | -1.1799141 |
| H | -3.3552862 | 0.2157827  | 3.7511785  | C  | 0.0200737  | 0.4701616  | -5.7743865 |
| H | -1.9743338 | 0.1005048  | 4.8805353  | C  | -0.3434919 | -0.1332684 | -4.5695948 |
| H | -1.7059619 | -0.1077182 | 3.1229842  | C  | -0.7288986 | -1.4991125 | -4.5567028 |
| C | -2.7285216 | 2.7738917  | 4.8525055  | C  | -0.7513069 | -2.2444635 | -5.7624451 |
| H | -0.9229270 | 2.1314831  | 3.8879275  | C  | -0.3927151 | -1.6299916 | -6.9659884 |
| H | -3.8303459 | 2.6546371  | 4.7884241  | C  | -0.0054171 | -0.2763161 | -6.9690920 |
| H | -2.5020372 | 3.8569237  | 4.7775361  | H  | 0.3245499  | 1.5269872  | -5.7901598 |
| H | -2.4117227 | 2.4238243  | 5.8566301  | C  | -1.0988401 | -2.1445132 | -3.3142026 |
| C | -5.5507827 | 2.5675668  | 0.1234578  | H  | -1.0593671 | -3.3013820 | -5.7437169 |
| C | -6.4176756 | 1.6560360  | 1.0000966  | H  | -0.4119972 | -2.2011489 | -7.9058039 |
| H | -7.3888909 | 1.4570267  | 0.5043576  | H  | 0.2822215  | 0.2044758  | -7.9168688 |
| H | -6.6377935 | 2.1242108  | 1.9823443  | O  | -1.2107748 | -1.5213479 | -2.2336019 |
| H | -5.9352877 | 0.6777801  | 1.1947486  | H  | -0.3254850 | 0.4267977  | -3.6243778 |
| C | -6.2552870 | 3.9180570  | -0.1144629 | H  | -1.2961195 | -3.2441301 | -3.3143407 |
| H | -5.4327156 | 2.0748658  | -0.8703583 | C  | -5.4261717 | -1.4445732 | -1.2749685 |
| H | -7.2568633 | 3.7645580  | -0.5662228 | C  | -4.6644747 | -1.3786302 | -0.1572953 |
| H | -5.6742317 | 4.5735946  | -0.7929779 | C  | -5.3530673 | -2.1762594 | 0.9020820  |
| H | -6.3913774 | 4.4604335  | 0.8447539  | O  | -6.5014273 | -2.7080996 | 0.3710957  |
| C | -0.9042847 | 4.3878239  | -0.6979520 | C  | -6.6261731 | -2.2930416 | -0.9947191 |
| C | -0.9054961 | 3.8707320  | -2.1456999 | C  | -5.0167040 | -2.3469955 | 2.0578838  |
| H | -0.1697254 | 4.4413059  | -2.7491790 | O  | -3.3782070 | -0.7072745 | 0.1594028  |
| H | -1.8932527 | 3.9807053  | -2.6374533 | H  | -7.5879731 | -1.7457489 | -1.1188122 |
| H | -0.6275216 | 2.8006847  | -2.1807905 | H  | -6.6705000 | -3.1968460 | -1.6437565 |
| C | -1.2250993 | 5.8955671  | -0.6556306 | H  | -3.0707654 | -1.0130437 | 1.1890274  |
| H | 0.1268337  | 4.2549025  | -0.3149783 | H  | -3.5496134 | 0.3821427  | 0.3686980  |
| H | -0.5049976 | 6.4691369  | -1.2754270 | H  | -5.2234078 | -0.9682647 | -2.2454476 |
| H | -1.1851432 | 6.2969503  | 0.3771220  |    |            |            |            |
| H | -2.2448899 | 6.0925378  | -1.0482042 |    |            |            |            |
| H | 0.0264131  | -5.4203001 | -2.5157515 |    |            |            |            |
| H | 4.9237008  | -2.3082470 | -3.5394118 |    |            |            |            |

int5

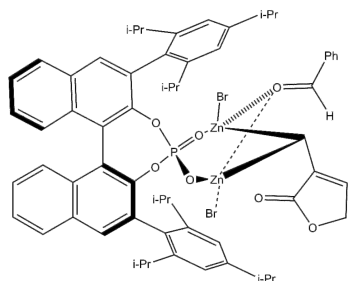

Energy (Hartree) = -11970.01592323

|   |            |            |            |
|---|------------|------------|------------|
| C | 0.8246382  | 2.1056028  | 1.9129911  |
| C | 2.2199453  | 2.1233020  | 2.0272826  |
| C | 2.8662275  | 3.4105170  | 2.1305962  |
| C | 4.2832281  | 3.5736695  | 2.0778809  |
| C | 2.0488148  | 4.5943325  | 2.2597722  |
| C | 2.6814282  | 5.8647610  | 2.4112481  |
| C | 0.6312720  | 4.4893389  | 2.1610070  |
| H | 0.0271798  | 5.4080901  | 2.2102119  |
| C | 0.0017560  | 3.2743116  | 1.9196268  |
| C | 3.3588554  | -1.3762905 | 0.9032492  |
| C | 4.3765914  | -1.6391533 | 1.8120348  |
| H | 4.9218387  | -2.5926639 | 1.7462192  |
| C | 4.6801476  | -0.7476515 | 2.8805744  |
| C | 5.6630932  | -1.0839524 | 3.8592385  |
| C | 3.9319650  | 0.4791965  | 3.0237987  |
| C | 4.1501921  | 1.2662115  | 4.1946362  |
| C | 2.9745571  | 0.8371344  | 2.0028319  |
| C | 2.7204822  | -0.1010660 | 0.9945649  |
| O | 0.1707813  | 0.8824015  | 1.8025927  |
| O | 1.7991757  | 0.2081137  | -0.0070870 |
| P | 0.2078670  | 0.1055607  | 0.3583181  |
| O | -0.5140776 | 0.8854095  | -0.7561339 |
| O | -0.2611414 | -1.3235384 | 0.6614142  |
| C | 4.0626039  | 5.9820684  | 2.3944218  |
| C | 4.8662780  | 4.8265574  | 2.2070386  |
| H | 2.0451713  | 6.7569685  | 2.5218523  |
| H | 4.5363992  | 6.9692230  | 2.5055961  |
| H | 4.9173734  | 2.6897098  | 1.9253893  |
| H | 5.9615424  | 4.9242243  | 2.1581375  |
| C | 5.0988355  | 0.8996607  | 5.1391460  |
| C | 5.8779570  | -0.2743457 | 4.9636937  |
| H | 3.5482549  | 2.1715085  | 4.3510068  |
| H | 5.2421852  | 1.5223815  | 6.0353182  |
| H | 6.6336564  | -0.5501537 | 5.7148063  |
| H | 6.2338837  | -2.0167574 | 3.7289442  |
| C | -1.8393952 | 3.6216473  | 0.2385637  |
| C | -1.4400957 | 3.1572321  | 1.5299679  |
| C | -3.1627986 | 3.3952583  | -0.1788072 |
| C | -2.3817590 | 2.5049253  | 2.3674322  |
| C | -3.7080984 | 2.3463622  | 1.9163345  |
| C | -4.1221698 | 2.7661606  | 0.6414499  |
| C | -2.0170429 | 1.9760705  | 3.7527401  |
| H | -4.4270683 | 1.8485153  | 2.5823481  |
| C | -2.2802933 | 0.4635431  | 3.8830423  |
| H | -3.3510602 | 0.2074745  | 3.7425889  |
| H | -1.9849988 | 0.1043159  | 4.8901407  |
| H | -1.6920909 | -0.1061971 | 3.1380290  |
| C | -2.7427195 | 2.7741935  | 4.8524376  |
| H | -0.9290629 | 2.1376276  | 3.8991337  |
| H | -3.8435728 | 2.6502317  | 4.7831911  |
| H | -2.5214714 | 3.8581329  | 4.7768939  |
| H | -2.4305630 | 2.4275078  | 5.8591172  |
| C | -5.5361010 | 2.5426678  | 0.1080079  |
| C | -6.4127476 | 1.6594749  | 1.0035607  |
| H | -7.3778809 | 1.4421065  | 0.5036817  |
| H | -6.6462373 | 2.1608254  | 1.9662168  |

|    |            |            |            |
|----|------------|------------|------------|
| H  | -5.9330859 | 0.6895381  | 1.2402068  |
| C  | -6.2375134 | 3.8847247  | -0.1793944 |
| H  | -5.4077429 | 2.0192984  | -0.8689203 |
| H  | -7.2350717 | 3.7175167  | -0.6350359 |
| H  | -5.6512279 | 4.5185720  | -0.8734612 |
| H  | -6.3819559 | 4.4580752  | 0.7602267  |
| C  | -0.8929448 | 4.3822918  | -0.6927558 |
| C  | -0.8804126 | 3.8598628  | -2.1386131 |
| H  | -0.1488399 | 4.4375414  | -2.7404707 |
| H  | -1.8663918 | 3.9541042  | -2.6370296 |
| H  | -0.5879382 | 2.7936093  | -2.1673213 |
| C  | -1.2238481 | 5.8879156  | -0.6576706 |
| H  | 0.1363755  | 4.2576495  | -0.3022707 |
| H  | -0.5032731 | 6.4650771  | -1.2735201 |
| H  | -1.1950512 | 6.2926402  | 0.3741042  |
| H  | -2.2419817 | 6.0776536  | -1.0576509 |
| H  | 0.0392541  | -5.4213641 | -2.5193226 |
| H  | 4.9198764  | -2.2818737 | -3.5437537 |
| H  | 3.8952181  | -4.5335107 | 2.2665885  |
| C  | 1.1298189  | -5.3931998 | -2.7536407 |
| H  | 3.5444527  | 0.5966473  | -3.4177742 |
| H  | 0.7555403  | -5.8726976 | -4.8513631 |
| H  | 0.3175249  | -4.1638060 | 3.4300277  |
| C  | 1.7240285  | -4.3189908 | -1.8445778 |
| C  | 5.1193024  | -1.5973451 | -2.6927138 |
| C  | 1.2923463  | -5.1103187 | -4.2511935 |
| H  | 2.3597267  | -5.1437106 | -4.5553613 |
| C  | 2.4664012  | -3.2264368 | -2.3209778 |
| C  | 2.8391409  | -4.7936302 | 2.4787468  |
| H  | 1.5508272  | -7.0482557 | -1.3520820 |
| C  | 1.5334427  | -4.4187984 | -0.4528010 |
| C  | 1.7036877  | -6.7840290 | -2.4164700 |
| H  | 1.2201482  | -7.5704622 | -3.0319619 |
| O  | 0.9210615  | -5.2457304 | -0.0631140 |
| C  | 2.9696999  | -0.2776651 | -3.0478854 |
| H  | 5.7392072  | -2.1499714 | -1.9581193 |
| H  | 5.7188728  | -0.7470712 | -3.0791868 |
| C  | 3.0143918  | -2.2577879 | -1.4549938 |
| C  | 0.4164789  | -4.0927031 | 2.3276454  |
| C  | 2.0781125  | -3.4989466 | 0.4561405  |
| H  | 2.7316381  | -4.9233290 | 3.5756270  |
| H  | 2.6382586  | -5.7743616 | 1.9987091  |
| C  | 3.8095493  | -1.0995661 | -2.0538867 |
| C  | 2.8371680  | -2.4020839 | -0.0560393 |
| C  | 1.8613737  | -3.7224293 | 1.9543114  |
| H  | 2.0471713  | 0.0986056  | -2.5650154 |
| H  | -0.2973369 | -3.3292568 | 1.9687392  |
| H  | 2.6755128  | -0.8783306 | -3.9341256 |
| H  | 0.9017136  | -4.1146664 | -4.5390068 |
| H  | 0.1049096  | -5.0705628 | 1.9075109  |
| H  | 2.7953483  | -6.8139123 | -2.6167574 |
| H  | 4.0922455  | -0.4209497 | -1.2231376 |
| H  | 2.0931993  | -2.7702463 | 2.4731918  |
| H  | 2.6344010  | -3.1117648 | -3.4019026 |
| Zn | -2.3239792 | 0.3277550  | -1.3608001 |
| Br | -3.4118836 | 1.1542202  | -3.2445865 |
| Zn | -1.7976866 | -2.1642525 | -0.2896265 |
| Br | -2.3454458 | -4.3929546 | -0.6040891 |
| H  | -3.4612583 | 3.7161344  | -1.1884193 |
| C  | -0.0312278 | 0.4515714  | -5.8149044 |
| C  | -0.3692450 | -0.1432656 | -4.5979558 |
| C  | -0.7425798 | -1.5112318 | -4.5659920 |
| C  | -0.7796254 | -2.2669539 | -5.7637480 |
| C  | -0.4458040 | -1.6617699 | -6.9789503 |
| C  | -0.0699410 | -0.3053814 | -7.0014553 |
| H  | 0.2611070  | 1.5115105  | -5.8435364 |
| C  | -1.0918227 | -2.1443839 | -3.3081573 |
| H  | -1.0770263 | -3.3266330 | -5.7289617 |
| H  | -0.4759206 | -2.2421102 | -7.9129286 |
| H  | 0.1971524  | 0.1685986  | -7.9587326 |
| O  | -1.1820231 | -1.5086746 | -2.2361019 |

|   |            |            |            |
|---|------------|------------|------------|
| H | -0.3435110 | 0.4260671  | -3.6586200 |
| H | -1.2951059 | -3.2438697 | -3.2905708 |
| C | -5.3903035 | -1.4703201 | -1.2751720 |
| C | -4.6607811 | -1.3622887 | -0.1409022 |
| C | -5.4059292 | -2.0723665 | 0.9455844  |
| O | -6.5553984 | -2.6019176 | 0.4077173  |
| C | -6.6233012 | -2.2682237 | -0.9801897 |
| O | -5.1087631 | -2.1757431 | 2.1171882  |
| C | -3.3630008 | -0.7128043 | 0.1750393  |
| H | -7.5647616 | -1.7036126 | -1.1712131 |
| H | -6.6717987 | -3.2080744 | -1.5767703 |
| H | -3.0542448 | -1.0400634 | 1.1984763  |
| H | -3.5233008 | 0.3723205  | 0.4161112  |
| H | -5.1440449 | -1.0537595 | -2.2631438 |

## int6; COSMO

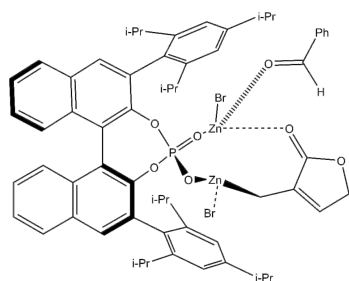

Energy (Hartree) = -11970.0428281

|   |            |            |            |
|---|------------|------------|------------|
| C | 0.7678386  | 2.2805654  | 1.9402338  |
| C | 2.1688243  | 2.3048900  | 1.9490717  |
| C | 2.8161480  | 3.5923357  | 2.0513793  |
| C | 4.2175529  | 3.7701363  | 1.8481456  |
| C | 2.0176012  | 4.7561209  | 2.3524267  |
| C | 2.6601441  | 6.0209516  | 2.5133156  |
| C | 0.6006156  | 4.6345566  | 2.4354709  |
| H | 0.0054726  | 5.5294162  | 2.6754203  |
| C | -0.0502837 | 3.4361786  | 2.1618175  |
| C | 3.3044378  | -1.2110952 | 0.8655992  |
| C | 4.3879469  | -1.4166090 | 1.7107741  |
| H | 4.9463959  | -2.3630284 | 1.6471985  |
| C | 4.7352561  | -0.4820033 | 2.7268062  |
| C | 5.7844775  | -0.7638984 | 3.6531248  |
| C | 3.9584723  | 0.7254669  | 2.8785834  |
| C | 4.2164509  | 1.5447830  | 4.0197606  |
| C | 2.9387605  | 1.0303130  | 1.8976901  |
| C | 2.6436472  | 0.0536977  | 0.9376928  |
| O | 0.1067243  | 1.0677507  | 1.7963787  |
| O | 1.6881491  | 0.3171339  | -0.0362078 |
| P | 0.0878125  | 0.3013635  | 0.3435625  |
| O | -0.5991410 | 1.0988568  | -0.7495561 |
| O | -0.4059716 | -1.1119262 | 0.6947483  |
| C | 4.0298892  | 6.1524310  | 2.3395496  |
| C | 4.8091127  | 5.0186937  | 1.9850659  |
| H | 2.0399000  | 6.8977704  | 2.7578153  |
| H | 4.5115540  | 7.1352005  | 2.4565772  |
| H | 4.8310275  | 2.9022425  | 1.5686105  |
| H | 5.8904767  | 5.1306711  | 1.8126146  |
| C | 5.2280675  | 1.2310238  | 4.9176693  |
| C | 6.0368561  | 0.0796588  | 4.7242558  |
| H | 3.5954953  | 2.4330766  | 4.1957442  |
| H | 5.3985120  | 1.8788500  | 5.7911485  |
| H | 6.8433337  | -0.1527328 | 5.4363694  |
| H | 6.3751453  | -1.6826550 | 3.5114475  |
| C | -2.1799426 | 4.0042989  | 0.9323813  |
| C | -1.5321416 | 3.3195479  | 2.0027331  |
| C | -3.5343960 | 3.7174861  | 0.6730341  |

|   |            |            |            |
|---|------------|------------|------------|
| C | -2.2822532 | 2.4411863  | 2.8371485  |
| C | -3.6343252 | 2.2048801  | 2.5389613  |
| C | -4.2739875 | 2.8019120  | 1.4390264  |
| C | -1.6807070 | 1.7957021  | 4.0845937  |
| H | -4.2040858 | 1.5170623  | 3.1827380  |
| C | -1.9174460 | 0.2769867  | 4.1505250  |
| H | -2.9926504 | 0.0328413  | 4.2795071  |
| H | -1.3779153 | -0.1594968 | 5.0161871  |
| H | -1.5552466 | -0.2237698 | 3.2318992  |
| C | -2.2050958 | 2.5038050  | 5.3494716  |
| H | -0.5845952 | 1.9584559  | 4.0580679  |
| H | -3.3051408 | 2.3874105  | 5.4459403  |
| H | -1.9833875 | 3.5902167  | 5.3243488  |
| H | -1.7379860 | 2.0774156  | 6.2615527  |
| C | -5.7248345 | 2.4879978  | 1.0957111  |
| C | -6.0042954 | 0.9748817  | 1.0673029  |
| H | -7.0250107 | 0.7719737  | 0.6830558  |
| H | -5.9407779 | 0.5303081  | 2.0822125  |
| H | -5.2761295 | 0.4388673  | 0.4258191  |
| C | -6.6908977 | 3.2172079  | 2.0483766  |
| H | -5.9017458 | 2.8822614  | 0.0702716  |
| H | -7.7476773 | 3.0234643  | 1.7695755  |
| H | -6.5238745 | 4.3131215  | 2.0304901  |
| H | -6.5476215 | 2.8722241  | 3.0940873  |
| C | -1.4640170 | 5.0034428  | 0.0196666  |
| C | -1.1699813 | 4.4066587  | -1.3653920 |
| H | -0.6569416 | 5.1347519  | -2.0261738 |
| H | -2.1092182 | 4.1103112  | -1.8832802 |
| H | -0.4977843 | 3.5294594  | -1.2733527 |
| C | -2.2239819 | 6.3365115  | -0.0890424 |
| H | -0.4793330 | 5.2316454  | 0.4683217  |
| H | -1.6324762 | 7.0711517  | -0.6731642 |
| H | -2.4208331 | 6.7707759  | 0.9123081  |
| H | -3.2012165 | 6.2192979  | -0.6019546 |
| H | 0.0915921  | -5.7761374 | -1.9918295 |
| H | 4.6292924  | -2.4154302 | -3.6059767 |
| H | 3.9236165  | -4.2953939 | 2.5168085  |
| C | 1.1719997  | -5.6965817 | -2.2592560 |
| H | 3.0811001  | 0.3673331  | -3.6283643 |
| H | 0.7982880  | -6.4538076 | -4.2725125 |
| H | 0.4184894  | -3.6906568 | 3.7765856  |
| C | 1.7046369  | -4.4839753 | -1.4977066 |
| C | 4.8417316  | -1.6518656 | -2.8282608 |
| C | 2.5912999  | -5.5847073 | -3.7841651 |
| H | 2.3449952  | -5.5720958 | -4.1102566 |
| C | 2.3580297  | -3.4082421 | -2.1194401 |
| C | 2.8699576  | -4.4953240 | 2.7974190  |
| H | 1.7420684  | -7.1390663 | -0.6844493 |
| C | 1.5482333  | -4.4308051 | -0.0978130 |
| C | 1.8532879  | -6.9935981 | -1.7768399 |
| H | 1.4164017  | -7.8796196 | -2.2822318 |
| H | 1.0024822  | -5.2436454 | 0.4050258  |
| C | 2.5912999  | -0.4974555 | -3.1355696 |
| H | 5.5447362  | -2.1025826 | -2.0982370 |
| H | 5.3573976  | -0.8038232 | -3.3246893 |
| C | 2.8667735  | -2.3146561 | -1.3886911 |
| C | 0.4677588  | -3.7041476 | 2.6681146  |
| C | 2.0642856  | -3.3829901 | 0.6818636  |
| H | 2.8065114  | -4.5056121 | 3.9054115  |
| H | 2.6158604  | -5.5129692 | 2.4330205  |
| C | 3.5493618  | -1.1752766 | -2.1400676 |
| C | 2.7489606  | -2.3165293 | 0.0230278  |
| C | 1.9100131  | -3.4453799 | 2.2039369  |
| H | 1.6823816  | -0.1191098 | -2.6305006 |
| H | -0.2163480 | -2.9226543 | 2.2873441  |
| H | 2.2709959  | -1.1967016 | -3.9365702 |
| H | 0.8069574  | -4.6677026 | -4.1825269 |
| H | 0.0814065  | -4.6863789 | 2.3285439  |
| H | 2.9397599  | -6.9696409 | -2.0048270 |
| H | 3.8426762  | -0.4103851 | -1.3921156 |
| H | 2.2019377  | -2.4577324 | 2.6126896  |



|    |            |            |            |
|----|------------|------------|------------|
| H  | 2.4799112  | -3.4033735 | -3.2124304 |
| Zn | -1.6562073 | 1.6255513  | -2.3522820 |
| Br | -0.2348854 | 2.0701826  | -4.1819171 |
| Zn | -1.4771010 | -2.3924242 | -0.2841515 |
| Br | -2.1742204 | -4.5876709 | 0.0492621  |
| H  | -4.0314819 | 4.2111255  | -0.1782680 |
| C  | -0.9145774 | -1.1992998 | -6.4141923 |
| C  | -0.8470862 | -1.4535136 | -5.0422249 |
| C  | -1.2233537 | -2.7244281 | -4.5457522 |
| C  | -1.6619197 | -3.7370302 | -5.4340551 |
| C  | -1.7225386 | -3.4765001 | -6.8078408 |
| C  | -1.3496548 | -2.2088417 | -7.2952924 |
| H  | -0.6308765 | -0.2056343 | -6.7926706 |
| C  | -1.2086450 | -2.9929755 | -3.1141524 |
| H  | -1.9514149 | -4.7226277 | -5.0359932 |
| H  | -2.0603542 | -4.2582539 | -7.5043956 |
| H  | -1.4002533 | -2.0056741 | -8.3763233 |
| O  | -0.8753764 | -2.1429204 | -2.2659711 |
| H  | -0.5146671 | -0.6670122 | -4.3475189 |
| H  | -1.5430736 | -4.0061141 | -2.7750858 |
| C  | -4.6612259 | -0.3404565 | -3.7466799 |
| C  | -4.0488626 | 0.1318136  | -2.6174177 |
| C  | -3.6509805 | -1.0691805 | -1.8543616 |
| O  | -4.0085319 | -2.1986609 | -2.4999019 |
| C  | -4.6715910 | -1.8321841 | -3.7306299 |
| O  | -3.0353313 | -1.0984731 | -0.7779477 |
| C  | -3.6540532 | 1.4643640  | -2.1543226 |
| H  | -5.6872049 | -2.2855562 | -3.7183970 |
| H  | -4.1041950 | -2.2947629 | -4.5698487 |
| H  | -3.7987207 | 1.5787283  | -1.0620949 |
| H  | -4.1644389 | 2.2789798  | -2.7017581 |
| H  | -5.0723183 | 0.2544800  | -4.5732347 |

|   |            |            |            |
|---|------------|------------|------------|
| O | -0.4246171 | -1.1148837 | 0.7148690  |
| C | 4.0317786  | 6.1423355  | 2.3337586  |
| C | 4.8063261  | 5.0070712  | 1.9763465  |
| H | 2.0455611  | 6.8928101  | 2.7576413  |
| H | 4.5163206  | 7.1236870  | 2.4502679  |
| H | 4.8202659  | 2.8906494  | 1.5586047  |
| H | 5.8874639  | 5.1158367  | 1.8009102  |
| C | 5.2307689  | 1.2236316  | 4.9009615  |
| C | 6.0376349  | 0.0722805  | 4.7038386  |
| H | 3.5948627  | 2.4260218  | 4.1869586  |
| H | 5.4058200  | 1.8716271  | 5.7733261  |
| H | 6.8474237  | -0.1607746 | 5.4118781  |
| H | 6.3684336  | -1.6899758 | 3.4897996  |
| C | -2.1818911 | 4.0105086  | 0.9335774  |
| C | -1.5377192 | 3.3260214  | 2.0059989  |
| C | -3.5370216 | 3.7286056  | 0.6745848  |
| C | -2.2913692 | 2.4525754  | 2.8417168  |
| C | -3.6438102 | 2.2206088  | 2.5428953  |
| C | -4.2807141 | 2.8180476  | 1.4420424  |
| C | -1.6928034 | 1.8087597  | 4.0913336  |
| H | -4.2160193 | 1.5359123  | 3.1876683  |
| C | -1.9356573 | 0.2914893  | 4.1633125  |
| H | -3.0114795 | 0.0510734  | 4.2937795  |
| H | -1.3978790 | -0.1442013 | 5.0302925  |
| H | -1.5759707 | -0.2151445 | 3.2470967  |
| C | -2.2136425 | 2.5249149  | 5.3529661  |
| H | -0.5960022 | 1.9665715  | 4.0636937  |
| H | -3.3142294 | 2.4153088  | 5.4499719  |
| H | -1.9870264 | 3.6099977  | 5.3230205  |
| H | -1.7493441 | 2.1004120  | 6.2672709  |
| C | -5.7337657 | 2.5123293  | 1.1005043  |
| C | -6.0274783 | 1.0019549  | 1.0860703  |
| H | -7.0504577 | 0.8047392  | 0.7049420  |
| H | -5.9679945 | 0.5654242  | 2.1046026  |
| H | -5.3053667 | 0.4524162  | 0.4493908  |
| C | -6.6936424 | 3.2601691  | 2.0447604  |
| H | -5.9061474 | 2.8974754  | 0.0706399  |
| H | -7.7524188 | 3.0743379  | 1.7682202  |
| H | -6.5154066 | 4.3539133  | 2.0170640  |
| H | -6.5537573 | 2.9250391  | 3.0939644  |
| C | -1.4605396 | 5.0035765  | 0.0183847  |
| C | -1.1651805 | 4.4012802  | -1.3638359 |
| H | -0.6482192 | 5.1237040  | -2.0276036 |
| H | -2.1040142 | 4.1062674  | -1.8832045 |
| H | -0.4962083 | 3.5220817  | -1.2684060 |
| C | -2.2150514 | 6.3391384  | -0.0959965 |
| H | -0.4759510 | 5.2294039  | 0.4686058  |
| H | -1.6197481 | 7.0710329  | -0.6796746 |
| H | -2.4156756 | 6.7761996  | 0.9032503  |
| H | -3.1909579 | 6.2253523  | -0.6121587 |
| H | 0.1225322  | -5.8218237 | -1.9919933 |
| H | 4.6095908  | -2.4008565 | -3.6200880 |
| H | 3.9180417  | -4.3091384 | 2.5043987  |
| C | 1.2007840  | -5.7240619 | -2.2624153 |
| H | 3.0374839  | 0.3681187  | -3.6333482 |
| H | 0.8382605  | -6.4919656 | -4.2745775 |
| H | 0.4147242  | -3.7188744 | 3.7692338  |
| C | 1.7144951  | -4.5012965 | -1.5042852 |
| C | 4.8172036  | -1.6377429 | -2.8407255 |
| C | 1.3084033  | -5.6135258 | -3.7876788 |
| H | 2.3687781  | -5.5842377 | -4.1154723 |
| C | 2.3568004  | -3.4194656 | -2.1263848 |
| C | 2.8649470  | -4.5091060 | 2.7868211  |
| H | 1.8003503  | -7.1519362 | -0.6863138 |
| C | 1.5526859  | -4.4469986 | -0.1054066 |
| C | 1.9062231  | -7.0076003 | -1.7791634 |
| H | 1.4847794  | -7.9032308 | -2.2808031 |
| H | 1.0118801  | -5.2634541 | 0.3968203  |
| C | 2.5565952  | -0.4999619 | -3.1381490 |
| H | 5.5254680  | -2.0855525 | -2.1142641 |
| H | 5.3250809  | -0.7847583 | -3.3364919 |

## int6



Energy (Hartree) = -11970.03012279

|   |            |            |            |
|---|------------|------------|------------|
| C | 0.7586505  | 2.2790022  | 1.9441930  |
| C | 2.1595875  | 2.3004602  | 1.9480870  |
| C | 2.8101149  | 3.5863950  | 2.0476000  |
| C | 4.2110508  | 3.7607363  | 1.8400463  |
| C | 2.0158376  | 4.7521736  | 2.3512587  |
| C | 2.6627081  | 6.0144047  | 2.5109798  |
| C | 0.5990848  | 4.6338419  | 2.4372023  |
| H | 0.0053794  | 5.5297392  | 2.6770845  |
| C | -0.0556779 | 3.4374229  | 2.1653120  |
| C | 3.2867148  | -1.2158228 | 0.8577637  |
| C | 4.3739212  | -1.4214641 | 1.6978744  |
| H | 4.9310099  | -2.3683474 | 1.6294886  |
| C | 4.7263330  | -0.4886605 | 2.7131828  |
| C | 5.7793432  | -0.7706843 | 3.6343999  |
| C | 3.9507803  | 0.7187527  | 2.8689036  |
| C | 4.2148580  | 1.5376273  | 4.0087240  |
| C | 2.9266576  | 1.0244641  | 1.8930565  |
| C | 2.6253747  | 0.0483848  | 0.9341153  |
| O | 0.0942620  | 1.0679080  | 1.8063966  |
| O | 1.6645684  | 0.3109117  | -0.0337313 |
| P | 0.0670074  | 0.2973837  | 0.3552801  |
| O | -0.6315147 | 1.0915387  | -0.7323441 |

|    |            |            |            |
|----|------------|------------|------------|
| C  | 2.8521086  | -2.3193138 | -1.3964630 |
| C  | 0.4620077  | -3.7201603 | 2.6606899  |
| C  | 2.0576125  | -3.3940120 | 0.6740456  |
| H  | 2.8038693  | -4.5207246 | 3.8948288  |
| H  | 2.6115357  | -5.5266860 | 2.4222113  |
| C  | 3.5231866  | -1.1730631 | -2.1478841 |
| C  | 2.7332394  | -2.3220185 | 0.0150678  |
| C  | 1.9037028  | -3.4588834 | 2.1961442  |
| H  | 1.6493996  | -0.1245485 | -2.6281952 |
| H  | -0.2213928 | -2.9323021 | 2.2922189  |
| H  | 2.2360449  | -1.2003868 | -3.9381617 |
| H  | 0.8168661  | -4.7050339 | -4.1876548 |
| H  | 0.0704737  | -4.6966341 | 2.3110665  |
| H  | 2.9916290  | -6.9644065 | -2.0085103 |
| H  | 3.8127120  | -0.4074236 | -1.3993270 |
| H  | 2.1953070  | -2.4720039 | 2.6069433  |
| H  | 2.4829838  | -3.4153291 | -3.2189472 |
| Zn | -1.6589536 | 1.6251310  | -2.3532273 |
| Br | -0.2712564 | 2.0678578  | -4.1942476 |
| Zn | -1.4754004 | -2.4146208 | -0.2582472 |
| Br | -2.1450708 | -4.6203641 | 0.0065558  |
| H  | -4.0319438 | 4.2223809  | -0.1779269 |
| C  | -0.9369734 | -1.1782049 | -6.3910119 |
| C  | -0.8526826 | -1.4372671 | -5.0205113 |
| C  | -1.1943077 | -2.7178260 | -4.5266030 |
| C  | -1.6139817 | -3.7365535 | -5.4161560 |
| C  | -1.6912113 | -3.4719952 | -6.7882652 |
| C  | -1.3535319 | -2.1934857 | -7.2730847 |
| H  | -0.6803764 | -0.1740055 | -6.7610811 |
| C  | -1.1689698 | -2.9872767 | -3.0928212 |
| H  | -1.8757298 | -4.7305758 | -5.0193749 |
| H  | -2.0139661 | -4.2592683 | -7.4859306 |
| H  | -1.4171860 | -1.9877315 | -8.3530586 |
| O  | -0.8625943 | -2.1276467 | -2.2471681 |
| H  | -0.5339413 | -0.6433384 | -4.3274593 |
| H  | -1.4754181 | -4.0088561 | -2.7503330 |
| C  | -4.6377060 | -0.3333917 | -3.7482406 |
| C  | -4.0413909 | 0.1288496  | -2.6059881 |
| C  | -3.6412061 | -1.0809522 | -1.8538316 |
| C  | -3.9818889 | -2.2047229 | -2.5223122 |
| O  | -4.6309856 | -1.8262415 | -3.7541803 |
| O  | -3.0397014 | -1.1209808 | -0.7725920 |
| C  | -3.6578182 | 1.4543740  | -2.1222702 |
| H  | -5.6414037 | -2.2928415 | -3.7627300 |
| H  | -4.0456334 | -2.2691956 | -4.5923424 |
| H  | -3.7832493 | 1.5472969  | -1.0260116 |
| H  | -4.1787646 | 2.2755588  | -2.6492351 |
| H  | -5.0425261 | 0.2712601  | -4.5705720 |

|   |            |            |            |
|---|------------|------------|------------|
| C | 2.6300717  | 4.7284876  | 1.6972704  |
| C | 3.3418717  | 5.9634983  | 1.7772203  |
| C | 1.2085908  | 4.6939032  | 1.7709750  |
| H | 0.6616271  | 5.6362329  | 1.9276651  |
| C | 0.4918115  | 3.5170364  | 1.5844889  |
| C | 3.5918613  | -1.3519580 | 0.4810755  |
| C | 4.6501971  | -1.5966333 | 1.3481723  |
| H | 5.1522879  | -2.5759667 | 1.3173532  |
| C | 5.0386247  | -0.6554242 | 2.3437162  |
| C | 6.0608336  | -0.9698897 | 3.2894179  |
| C | 4.3339931  | 0.6005091  | 2.4532256  |
| C | 4.6345622  | 1.4411034  | 3.5676839  |
| C | 3.3390797  | 0.9335361  | 1.4570920  |
| C | 3.0008186  | -0.0522496 | 0.5237794  |
| O | 0.5071868  | 1.1327386  | 1.3197722  |
| O | 2.0657985  | 0.2351183  | -0.4647798 |
| P | 0.4732373  | 0.3490003  | -0.1239685 |
| O | -0.1177245 | 1.1661664  | -1.2763330 |
| O | -0.1701714 | -1.0108258 | 0.2180580  |
| C | 4.7191859  | 6.0043424  | 1.6222072  |
| C | 5.4368708  | 4.8052096  | 1.3669572  |
| H | 2.7691193  | 6.8890973  | 1.9454183  |
| H | 5.2548577  | 6.9642311  | 1.6773698  |
| H | 5.3430347  | 2.6672095  | 1.0996137  |
| H | 6.5256077  | 4.8425763  | 1.2094774  |
| C | 5.6195042  | 1.0964193  | 4.4836295  |
| C | 6.3560201  | -0.1087247 | 4.3352902  |
| H | 4.0687941  | 2.3721390  | 3.7057350  |
| H | 5.8253813  | 1.7621379  | 5.3357047  |
| H | 7.1417596  | -0.3665859 | 5.0616050  |
| H | 6.5967062  | -1.9261268 | 3.1823772  |
| C | -1.6347537 | 4.1308480  | 0.3723108  |
| C | -1.0009688 | 3.4962555  | 1.4812443  |
| C | -3.0369390 | 4.0649002  | 0.2698375  |
| C | -1.7895046 | 2.8251936  | 2.4575010  |
| C | -3.1896957 | 2.8083537  | 2.3134839  |
| C | -3.8376445 | 3.4124066  | 1.2231389  |
| C | -1.1745882 | 2.1504607  | 3.6829024  |
| H | -3.7902886 | 2.2933501  | 3.0783504  |
| C | -1.5506669 | 0.6600212  | 3.7761646  |
| H | -2.6407801 | 0.5241801  | 3.9404513  |
| H | -1.0281830 | 0.1785831  | 4.6282061  |
| H | -1.2629488 | 0.1186705  | 2.8534230  |
| C | -1.5451140 | 2.9089229  | 4.9711562  |
| H | -0.0718203 | 2.2037352  | 3.5849938  |
| H | -2.6408446 | 2.8935409  | 5.1493433  |
| H | -1.2300015 | 3.9706321  | 4.9158845  |
| H | -1.0540331 | 2.4493049  | 5.8538011  |
| C | -5.3547178 | 3.4181930  | 1.0710063  |
| C | -6.0434766 | 2.1692427  | 1.6391680  |
| H | -7.1234727 | 2.1750880  | 1.3882167  |
| H | -5.9686325 | 2.1268884  | 2.7460358  |
| H | -5.6009748 | 1.2364407  | 1.2353016  |
| C | -5.9455693 | 4.7034914  | 1.6845831  |
| H | -5.5610938 | 3.4469956  | -0.0225429 |
| H | -7.0427296 | 4.7542857  | 1.5251818  |
| H | -5.4893459 | 5.6104561  | 1.2395022  |
| H | -5.7558356 | 4.7354399  | 2.7781945  |
| C | -0.8595966 | 4.8986306  | -0.6992731 |
| C | -1.1480891 | 4.3932627  | -2.1203520 |
| H | -0.5661052 | 4.9748419  | -2.8646051 |
| H | -2.2182194 | 4.4840201  | -2.3978997 |
| H | -0.8590965 | 3.3316184  | -2.2305099 |
| C | -1.1243837 | 6.4118073  | -0.5774468 |
| H | 0.2209578  | 4.7353232  | -0.5189764 |
| H | -0.5111325 | 6.9773587  | -1.3091374 |
| H | -0.8855331 | 6.7911312  | 0.4373351  |
| H | -2.1904099 | 6.6498961  | -0.7763918 |
| H | 0.6338617  | -6.3168542 | -1.9350713 |
| H | 4.7377760  | -2.6120100 | -3.9732945 |
| H | 2.9515326  | -4.8115079 | 3.4880886  |

## 7.9.4 Pathway 14d-ma ↔ 14d-mi

### TS1; COSMO

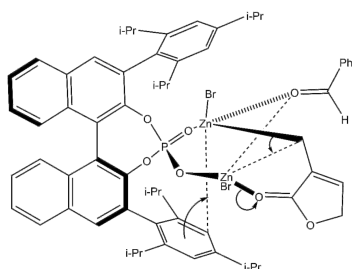

Energy (Hartree) = -11970.01623707

|   |           |           |           |
|---|-----------|-----------|-----------|
| C | 1.2424376 | 2.3100987 | 1.4325184 |
| C | 2.6424269 | 2.2514393 | 1.4545281 |
| C | 3.3637378 | 3.5024226 | 1.4932897 |
| C | 4.7765102 | 3.5856963 | 1.3062349 |



|    |            |            |            |
|----|------------|------------|------------|
| C  | 1.0075713  | -5.5668604 | -2.6661017 |
| H  | 3.3525385  | 0.2740338  | -4.0301039 |
| H  | -0.7537509 | -5.8043678 | -3.9656920 |
| H  | 0.6959711  | -3.6189833 | 3.4428861  |
| C  | 1.6965958  | -4.4728896 | -1.8605952 |
| C  | 4.9934159  | -1.8417259 | -3.2155753 |
| C  | -0.2149552 | -5.0074807 | -3.4118737 |
| H  | 0.0844290  | -4.2325213 | -4.1492090 |
| C  | 2.3602850  | -3.4074110 | -2.4948457 |
| C  | 2.9872251  | -4.7783214 | 2.3793154  |
| H  | 2.8473303  | -6.7013838 | -3.0761577 |
| C  | 1.6684102  | -4.4846350 | -0.4576813 |
| C  | 1.9761908  | -6.2848444 | -3.6211311 |
| H  | 1.4659834  | -7.1190368 | -4.1457492 |
| H  | 1.1282956  | -5.2994646 | 0.0502941  |
| C  | 2.8142191  | -0.5678959 | -3.5481506 |
| H  | 5.5542955  | -1.0344492 | -3.7308960 |
| H  | 5.6710975  | -2.3133687 | -2.4751812 |
| C  | 2.9952089  | -2.3831515 | -1.7714734 |
| C  | 0.7258563  | -3.6160800 | 2.3333382  |
| C  | 2.2872395  | -3.4865399 | 0.3185691  |
| H  | 4.0517887  | -4.7264688 | 2.0717800  |
| H  | 2.5791235  | -5.7388141 | 2.0005608  |
| C  | 3.7281204  | -1.2835618 | -2.5369236 |
| C  | 2.9716408  | -2.4295612 | -0.3500724 |
| C  | 2.1832790  | -3.5795424 | 1.8426150  |
| H  | 1.9109554  | -0.1550936 | -3.0572017 |
| H  | 0.1676015  | -2.7317215 | 1.9705386  |
| H  | 2.4851433  | -1.2525696 | -4.3578997 |
| H  | -0.9253444 | -4.5471342 | -2.6984830 |
| H  | 0.1847029  | -4.5174311 | 1.9803493  |
| H  | 2.3658871  | -5.5943003 | -4.3982641 |
| H  | 4.0642347  | -0.5249859 | -1.8017984 |
| H  | 2.6359729  | -2.6642237 | 2.2708006  |
| H  | 2.3923007  | -3.3741536 | -3.5958371 |
| Zn | -1.9298870 | 0.6906545  | -2.0416578 |
| Br | -2.3769862 | 1.4869167  | -4.1893337 |
| Zn | -1.7350755 | -1.8815622 | -0.5314520 |
| Br | -2.2659659 | -4.0901032 | -0.0052533 |
| H  | -3.5293352 | 4.5396774  | -0.5949852 |
| C  | -4.3828072 | -4.5047554 | -4.0617782 |
| C  | -3.4941956 | -3.5992635 | -3.4810710 |
| C  | -2.7140007 | -2.7538408 | -4.3101064 |
| C  | -2.8479765 | -2.8252722 | -5.7216733 |
| C  | -3.7408086 | -3.7339345 | -6.2947359 |
| C  | -4.5070903 | -4.5726095 | -5.4632348 |
| H  | -4.9893699 | -5.1597069 | -3.4192062 |
| C  | -1.7869550 | -1.7786453 | -3.7851499 |
| H  | -2.2512561 | -2.1503570 | -6.3552296 |
| H  | -3.8497666 | -3.7892058 | -7.3878716 |
| H  | -5.2143562 | -5.2862655 | -5.9137296 |
| O  | -1.5327260 | -1.5467089 | -2.5718868 |
| H  | -3.3838384 | -3.5546722 | -2.3889763 |
| H  | -1.2574854 | -1.1452681 | -4.5329673 |
| C  | -4.2027698 | -1.3275198 | 1.2472023  |
| C  | -3.9603073 | -0.7232341 | 0.0479308  |
| C  | -4.8564242 | -1.3775188 | -0.9611558 |
| O  | -5.6013251 | -2.3367176 | -0.3260432 |
| C  | -5.2339804 | -2.3925649 | 1.0593198  |
| O  | -4.9348349 | -1.1587485 | -2.1546293 |
| C  | -3.0555729 | 0.3763980  | -0.3376221 |
| H  | -4.8344951 | -3.4090004 | 1.2760484  |
| H  | -6.1416192 | -2.2318180 | 1.6833617  |
| H  | -2.5201274 | 0.7903740  | 0.5370755  |
| H  | -3.6964450 | 1.1998430  | -0.7384641 |
| H  | -3.7241945 | -1.0998733 | 2.2097839  |

TS1

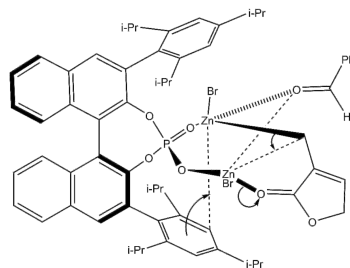

Energy (Hartree) = -11970.00313366  
number of imaginary frequencies: 2

|   |            |            |            |
|---|------------|------------|------------|
| C | 1.2438756  | 2.3091897  | 1.4343458  |
| C | 2.6438493  | 2.2519418  | 1.4573809  |
| C | 3.3639565  | 3.5034464  | 1.4948021  |
| C | 4.7767898  | 3.5871695  | 1.3102424  |
| C | 2.6293228  | 4.7293320  | 1.6952471  |
| C | 3.3405602  | 5.9643613  | 1.7738178  |
| C | 1.2079758  | 4.6934912  | 1.7673420  |
| H | 0.6596885  | 5.6355795  | 1.9207500  |
| C | 0.4922905  | 3.5158116  | 1.5830753  |
| C | 3.5939157  | -1.3508168 | 0.4849708  |
| C | 4.6512714  | -1.5956320 | 1.3529170  |
| H | 5.1525318  | -2.5753868 | 1.3224121  |
| C | 5.0395665  | -0.6547041 | 2.3485975  |
| C | 6.0608985  | -0.9685648 | 3.2949040  |
| C | 4.3352976  | 0.6013285  | 2.4574731  |
| C | 4.6356667  | 1.4421212  | 3.5715445  |
| C | 3.3410515  | 0.9345505  | 1.4609510  |
| C | 3.0032828  | -0.0508978 | 0.5271100  |
| O | 0.5096060  | 1.1315614  | 1.3223858  |
| O | 2.0695115  | 0.2358615  | -0.4618182 |
| P | 0.4765278  | 0.3480907  | -0.1224192 |
| O | -0.1176627 | 1.1634391  | -1.2730116 |
| O | -0.1617535 | -1.0144764 | 0.2198161  |
| C | 4.7176752  | 6.0057658  | 1.6211608  |
| C | 5.4361828  | 4.8068574  | 1.3697236  |
| H | 2.7670278  | 6.8899955  | 1.9390276  |
| H | 5.2526489  | 6.9660640  | 1.6753053  |
| H | 5.3438005  | 2.6683751  | 1.1067565  |
| H | 6.5251540  | 4.8444291  | 1.2142437  |
| C | 5.6199496  | 1.0975930  | 4.4877303  |
| C | 6.3559236  | -0.1074308 | 4.3402667  |
| H | 4.0700967  | 2.3733872  | 3.7085172  |
| H | 5.8257112  | 1.7636423  | 5.3395224  |
| H | 7.1412524  | -0.3653211 | 5.0669661  |
| H | 6.5964567  | -1.9250304 | 3.1885681  |
| C | -1.6325165 | 4.1248005  | 0.3658513  |
| C | -1.0001419 | 3.4935206  | 1.4773184  |
| C | -3.0342736 | 4.0564312  | 0.2613717  |
| C | -1.7893048 | 2.8233870  | 2.4533728  |
| C | -3.1889117 | 2.8041397  | 2.3068612  |
| C | -3.8357073 | 3.4049851  | 1.2143957  |
| C | -1.1752632 | 2.1524606  | 3.6812904  |
| H | -3.7901218 | 2.2899599  | 3.0717957  |
| C | -1.5486081 | 0.6616128  | 3.7777713  |
| H | -2.6386742 | 0.5242404  | 3.9416563  |
| H | -1.0261348 | 0.1828638  | 4.6312652  |
| H | -1.2590976 | 0.1186253  | 2.8566254  |
| C | -1.5481180 | 2.9137839  | 4.9671276  |
| H | -0.0724899 | 2.2070300  | 3.5844295  |
| H | -2.6439310 | 2.8977025  | 5.1443336  |
| H | -1.2346811 | 3.9756803  | 4.9091965  |
| H | -1.0574760 | 2.4574800  | 5.8517113  |
| C | -5.3525679 | 3.4085225  | 1.0597886  |
| C | -6.0407123 | 2.1589606  | 1.6273413  |
| H | -7.1203368 | 2.1631287  | 1.3749019  |

|    |            |            |            |
|----|------------|------------|------------|
| H  | -5.9678695 | 2.1175230  | 2.7343746  |
| H  | -5.5963685 | 1.2264661  | 1.2248926  |
| C  | -5.9464831 | 4.6935139  | 1.6709078  |
| H  | -5.5571283 | 3.4357375  | -0.0342075 |
| H  | -7.0434338 | 4.7429428  | 1.5096880  |
| H  | -5.4905262 | 5.6005539  | 1.2260716  |
| H  | -5.7585369 | 4.7270459  | 2.7646432  |
| C  | -0.8566299 | 4.8907425  | -0.7065069 |
| C  | -1.1408669 | 4.3812715  | -2.1271213 |
| H  | -0.5579192 | 4.9616866  | -2.8712855 |
| H  | -2.2101510 | 4.4696782  | -2.4084360 |
| H  | -0.8494951 | 3.3201479  | -2.2346185 |
| C  | -1.1240682 | 6.4037775  | -0.5885402 |
| H  | 0.2237562  | 4.7295760  | -0.5234052 |
| H  | -0.5106148 | 6.9686769  | -1.3204641 |
| H  | -0.8880118 | 6.7861868  | 0.4257269  |
| H  | -2.1899799 | 6.6399749  | -0.7898896 |
| H  | 0.6262017  | -6.3068813 | -1.9354978 |
| H  | 4.7402912  | -2.6113486 | -3.9699510 |
| H  | 2.9487775  | -4.8138231 | 3.4878836  |
| C  | 1.0032721  | -5.5581345 | -2.6660634 |
| H  | 3.3633027  | 0.2794760  | -4.0229551 |
| H  | -0.7575197 | -5.7915674 | -3.9673682 |
| H  | 0.6955110  | -3.6162500 | 3.4454846  |
| C  | 1.6944668  | -4.4664069 | -1.8592848 |
| C  | 4.9977378  | -1.8427156 | -3.2112829 |
| C  | -0.2170300 | -4.9960340 | -3.4132868 |
| H  | 0.0852732  | -4.2223283 | -4.1508382 |
| C  | 2.3611280  | -3.4022963 | -2.4921596 |
| C  | 2.9840139  | -4.7788717 | 2.3791956  |
| H  | 2.8403742  | -6.6976848 | -3.0729485 |
| C  | 1.6653216  | -4.4790070 | -0.4566829 |
| C  | 1.9712114  | -6.2792935 | -3.6193039 |
| H  | 1.4598135  | -7.1123074 | -4.1446195 |
| H  | 1.1225570  | -5.2925838 | 0.0503279  |
| C  | 2.8223757  | -0.5612787 | -3.5421544 |
| H  | 5.5612332  | -1.0366295 | -3.7255479 |
| H  | 5.6737164  | -2.3174940 | -2.4715417 |
| C  | 2.9979895  | -2.3801091 | -1.7680459 |
| C  | 0.7249300  | -3.6121891 | 2.3359949  |
| C  | 2.2861891  | -3.4832798 | 0.3206026  |
| H  | 4.0484524  | -4.7289230 | 2.0711872  |
| H  | 2.5742041  | -5.7379989 | 1.9991750  |
| C  | 3.7339699  | -1.2816995 | -2.5322259 |
| C  | 2.9733537  | -2.4275568 | -0.3469038 |
| C  | 2.1821809  | -3.5778180 | 1.8445525  |
| H  | 1.9207940  | -0.1455569 | -3.0509060 |
| H  | 0.1683577  | -2.7262623 | 1.9747517  |
| H  | 2.4912413  | -1.2435182 | -4.3532272 |
| H  | -0.9269127 | -4.5336945 | -2.7007845 |
| H  | 0.1813286  | -4.5117925 | 1.9825610  |
| H  | 2.3642988  | -5.5902919 | -4.3959971 |
| H  | 4.0721233  | -0.5251531 | -1.7959350 |
| H  | 2.6369533  | -2.6640010 | 2.2737751  |
| H  | 2.3943850  | -3.3685476 | -3.5931177 |
| Zn | -1.9291173 | 0.6825357  | -2.0390622 |
| Br | -2.3750742 | 1.4712808  | -4.1879416 |
| Zn | -1.7228435 | -1.8899599 | -0.5308066 |
| Br | -2.2543620 | -4.0989743 | -0.0108428 |
| H  | -3.5256142 | 4.5281122  | -0.6057206 |
| C  | -4.4061630 | -4.4761420 | -4.0563429 |
| C  | -3.5055191 | -3.5812938 | -3.4775761 |
| C  | -2.7236779 | -2.7396033 | -4.3077775 |
| C  | -2.8678806 | -2.8039131 | -5.7180581 |
| C  | -3.7720253 | -3.7020948 | -6.2892441 |
| C  | -4.5403052 | -4.5372495 | -5.4564390 |
| H  | -5.0144392 | -5.1273767 | -3.4117302 |
| C  | -1.7851465 | -1.7736514 | -3.7832444 |
| H  | -2.2704424 | -2.1302646 | -6.3523370 |
| H  | -3.8884990 | -3.7517710 | -7.3819259 |
| H  | -5.2570703 | -5.2425134 | -5.9053060 |

|   |            |            |            |
|---|------------|------------|------------|
| O | -1.5231601 | -1.5508470 | -2.5711502 |
| H | -3.3869497 | -3.5433576 | -2.3861240 |
| H | -1.2544640 | -1.1399264 | -4.5302438 |
| C | -4.1900914 | -1.3437194 | 1.2528445  |
| C | -3.9528033 | -0.7391202 | 0.0531239  |
| C | -4.8459481 | -1.4008434 | -0.9556718 |
| O | -5.5851071 | -2.3641872 | -0.3171278 |
| C | -5.2150448 | -2.4160880 | 1.0659981  |
| O | -4.9235307 | -1.1854946 | -2.1479861 |
| C | -3.0535907 | 0.3635685  | -0.3345821 |
| H | -4.8075702 | -3.4298076 | 1.2820821  |
| H | -6.1231421 | -2.2614669 | 1.6917523  |
| H | -2.5220346 | 0.7840496  | 0.5393792  |
| H | -3.6992284 | 1.1808404  | -0.7401334 |
| H | -3.7111969 | -1.1116883 | 2.2142780  |

## TS2; COSMO

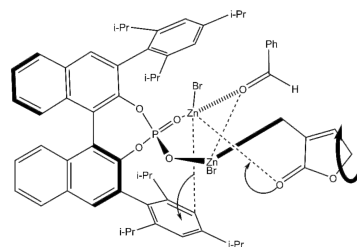

Energy (Hartree) = -11970.01103186

|   |            |            |            |
|---|------------|------------|------------|
| C | 0.2453651  | 3.3048926  | -0.1630926 |
| C | 1.4955627  | 3.6450020  | -0.6986467 |
| C | 1.5547804  | 4.7163780  | -1.6619174 |
| C | 2.7301875  | 5.0150880  | -2.4147317 |
| C | 0.3699808  | 5.5028401  | -1.9013294 |
| C | 0.4266328  | 6.5842881  | -2.8316948 |
| C | -0.8366018 | 5.1747793  | -1.2217638 |
| H | -1.7229660 | 5.8058932  | -1.3841655 |
| C | -0.9436284 | 4.0636334  | -0.3909475 |
| C | 3.8287443  | 0.7679435  | 0.2888193  |
| C | 4.9697322  | 1.4483090  | 0.6912007  |
| H | 5.8398890  | 0.8821073  | 1.0567932  |
| C | 5.0132995  | 2.8716028  | 0.7187446  |
| C | 6.1614278  | 3.5598444  | 1.2144351  |
| C | 3.8484700  | 3.6272602  | 0.3208272  |
| C | 3.8662480  | 5.0403563  | 0.5265780  |
| C | 2.7115959  | 2.9258667  | -0.2326399 |
| C | 2.7406972  | 1.5285309  | -0.2348452 |
| O | 0.1490483  | 2.2052153  | 0.6925024  |
| O | 1.6870117  | 0.8168076  | -0.7934954 |
| P | 0.2383482  | 0.7173748  | 0.0004777  |
| O | -0.8156966 | 0.4808849  | -1.0619055 |
| O | 0.3525113  | -0.2551222 | 1.1948083  |
| C | 1.5922899  | 6.8635998  | -3.5292183 |
| C | 2.7475199  | 6.0610176  | -3.3274166 |
| H | -0.4826242 | 7.1835135  | -2.9964480 |
| H | 1.6208581  | 7.6949478  | -4.2499686 |
| H | 3.6276674  | 4.3962580  | -2.2742649 |
| H | 3.6626445  | 6.2659672  | -3.9037745 |
| C | 4.9910069  | 5.6785640  | 1.0315395  |
| C | 6.1579255  | 4.9386494  | 1.3604611  |
| H | 2.9707881  | 5.6293916  | 0.2879127  |
| H | 4.9740848  | 6.7685659  | 1.1835850  |
| H | 7.0466380  | 5.4576748  | 1.7505133  |
| H | 7.0454434  | 2.9682258  | 1.5000872  |
| C | -3.3403836 | 3.2747919  | -0.5613851 |
| C | -2.2441358 | 3.6907838  | 0.2473688  |

|   |            |            |            |    |            |            |            |
|---|------------|------------|------------|----|------------|------------|------------|
| C | -4.5736379 | 3.0036863  | 0.0612544  | H  | 3.0608703  | 0.8504540  | 2.5980796  |
| C | -2.4016524 | 3.7924855  | 1.6587824  | H  | 3.8448534  | -3.7391071 | -1.0666695 |
| C | -3.6582416 | 3.5145096  | 2.2245989  | Zn | -2.1066582 | -1.0416447 | -1.5305296 |
| C | -4.7642257 | 3.1300421  | 1.4471713  | Br | -1.4325673 | -1.3958462 | -3.7652958 |
| C | -1.2688653 | 4.2406637  | 2.5821870  | Zn | 0.5882537  | -2.1673867 | 1.3579281  |
| H | -3.7795813 | 3.6126528  | 3.3148169  | Br | -0.1508680 | -3.6639989 | 2.9759374  |
| C | -0.9212944 | 3.1627339  | 3.6252822  | H  | -5.4284501 | 2.6863254  | -0.5578015 |
| H | -1.7684883 | 2.9783508  | 4.3183172  | C  | -2.0811720 | -5.3244321 | -3.4283670 |
| H | -0.0516265 | 3.4798975  | 4.2378443  | C  | -1.5311986 | -4.4693710 | -2.4724008 |
| H | -0.6644704 | 2.2048410  | 3.1326129  | C  | -0.1234573 | -4.3415259 | -2.3654789 |
| C | -1.5931184 | 5.5916696  | 3.2470112  | C  | 0.7183159  | -5.0629509 | -3.2495738 |
| H | -0.3633937 | 4.4013452  | 1.9633334  | C  | 0.1627151  | -5.9076773 | -4.2143896 |
| H | -2.4850733 | 5.5176807  | 3.9035649  | C  | -1.2361099 | -6.0406091 | -4.2981588 |
| H | -1.7992811 | 6.3735844  | 2.4878232  | H  | -3.1731662 | -5.4230737 | -3.5133562 |
| H | -0.7435574 | 5.9350419  | 3.8733712  | C  | 0.5094490  | -3.5009559 | -1.3729399 |
| C | -6.1418027 | 2.9280734  | 2.0657227  | H  | 1.8115865  | -4.9523209 | -3.1705518 |
| C | -6.1212541 | 2.0349879  | 3.3160394  | H  | 0.8137908  | -6.4660507 | -4.9028148 |
| H | -7.1554870 | 1.8572756  | 3.6775838  | H  | -1.6748685 | -6.7079491 | -5.0559747 |
| H | -5.5661167 | 2.5157972  | 4.1491671  | O  | -0.0898165 | -2.8139962 | -0.5093829 |
| H | -5.6553578 | 1.0540246  | 3.1044782  | H  | -2.1779193 | -3.8810295 | -1.8080092 |
| C | -6.7937077 | 4.2934904  | 2.3615766  | H  | 1.6213921  | -3.4917815 | -1.3806685 |
| H | -6.7640626 | 2.4172756  | 1.2979453  | C  | -3.2290478 | -3.5601519 | 0.8764466  |
| H | -7.8221323 | 4.1641150  | 2.7589716  | C  | -3.6672512 | -2.2781299 | 0.8165316  |
| H | -6.8515604 | 4.9231758  | 1.4503058  | C  | -4.4272548 | -2.0354680 | 2.0873240  |
| H | -6.2055404 | 4.8530724  | 3.1194620  | O  | -4.4286470 | -3.1885907 | 2.8379221  |
| C | -3.2297976 | 3.1215410  | -2.0792557 | C  | -3.7005441 | -4.2041722 | 2.1405731  |
| C | -3.7734822 | 1.7730515  | -2.5750470 | O  | -4.9781993 | -1.0214738 | 2.4677219  |
| H | -3.5381117 | 1.6205064  | -3.6471785 | C  | -3.5895953 | -1.2129930 | -0.2184109 |
| H | -4.8725329 | 1.6871930  | -2.4513892 | H  | -4.3730371 | -5.0738776 | 1.9596916  |
| H | -3.3101662 | 0.9410392  | -2.0119440 | H  | -2.8578022 | -4.5498871 | 2.7787998  |
| C | -3.9298762 | 4.2802510  | -2.8152360 | H  | -3.6774029 | -0.2266702 | 0.2895960  |
| H | -2.1526295 | 3.1470974  | -2.3412284 | H  | -4.5085673 | -1.2834941 | -0.8472057 |
| H | -3.8081252 | 4.1796876  | -3.9137517 | H  | -2.6074167 | -4.0898809 | 0.1439933  |
| H | -3.5255852 | 5.2676164  | -2.5157631 |    |            |            |            |
| H | -5.0176703 | 4.2870466  | -2.5932618 |    |            |            |            |
| H | 2.7390120  | -5.0219447 | 2.3673082  |    |            |            |            |
| H | 5.5338168  | -2.8502707 | -2.4485664 |    |            |            |            |
| H | 4.5087352  | 0.5072074  | 4.6057033  |    |            |            |            |
| C | 3.1418071  | -4.9601639 | 1.3339599  |    |            |            |            |
| H | 3.3366427  | -1.0771364 | -3.9557738 |    |            |            |            |
| H | 2.1235457  | -6.7998123 | 0.7470175  |    |            |            |            |
| H | 2.0290529  | 0.3238205  | 4.7805582  |    |            |            |            |
| C | 3.2365604  | -3.4763271 | 0.9991396  |    |            |            |            |
| C | 5.5529113  | -1.7425587 | -2.3737975 |    |            |            |            |
| C | 2.1727345  | -5.7381381 | 0.4313534  |    |            |            |            |
| H | 2.4902065  | -5.7284293 | -0.6323198 |    |            |            |            |
| C | 3.6363010  | -3.0099889 | -0.2666386 |    |            |            |            |
| C | 4.5128614  | -0.2296679 | 3.7769636  |    |            |            |            |
| H | 5.2310940  | -5.0569615 | 2.0218337  |    |            |            |            |
| C | 3.0215823  | -2.5131911 | 2.0180221  |    |            |            |            |
| C | 4.5477459  | -5.5899703 | 1.3306731  |    |            |            |            |
| H | 4.4984482  | -6.6524135 | 1.6454452  |    |            |            |            |
| H | 2.7699253  | -2.8722710 | 3.0272491  |    |            |            |            |
| C | 3.0845473  | -1.5078034 | -2.9656480 |    |            |            |            |
| H | 5.8374199  | -1.3474801 | -3.3702113 |    |            |            |            |
| H | 6.3494849  | -1.4663142 | -1.6537030 |    |            |            |            |
| C | 3.8113467  | -1.6357278 | -0.5370502 |    |            |            |            |
| C | 1.9992140  | -0.4205516 | 3.9595627  |    |            |            |            |
| C | 3.2517452  | -1.1315851 | 1.8142899  |    |            |            |            |
| H | 5.3802689  | -0.0068991 | 3.1255569  |    |            |            |            |
| H | 4.6704571  | -1.2370847 | 4.2158835  |    |            |            |            |
| C | 4.1873826  | -1.1787494 | -1.9426797 |    |            |            |            |
| C | 3.6429309  | -0.6983610 | 0.5141544  |    |            |            |            |
| C | 3.1776832  | -0.1746766 | 3.0039954  |    |            |            |            |
| H | 2.1029700  | -1.0936015 | -2.6603193 |    |            |            |            |
| H | 1.0262640  | -0.3052704 | 3.4452722  |    |            |            |            |
| H | 2.9750298  | -2.6036630 | -3.1111422 |    |            |            |            |
| H | 1.1452733  | -5.3284022 | 0.5060160  |    |            |            |            |
| H | 2.0310375  | -1.4242770 | 4.4307565  |    |            |            |            |
| H | 4.9994970  | -5.5578301 | 0.3171137  |    |            |            |            |
| H | 4.2832148  | -0.0741043 | -1.9090165 |    |            |            |            |

## TS2

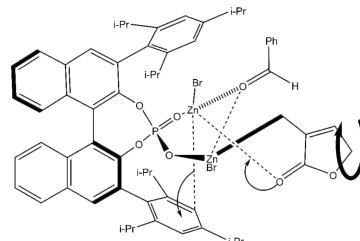

Energy (Hartree) = -11969.99547707  
number of imaginary frequencies: 2

|   |            |           |            |
|---|------------|-----------|------------|
| C | 0.2412209  | 3.3066821 | -0.1645050 |
| C | 1.4919326  | 3.6433500 | -0.7004708 |
| C | 1.5537886  | 4.7136577 | -1.6644835 |
| C | 2.7297982  | 5.0100506 | -2.4166963 |
| C | 0.3705119  | 5.5016565 | -1.9052685 |
| C | 0.4301569  | 6.5814512 | -2.8366382 |
| C | -0.8364618 | 5.1763355 | -1.2255927 |
| H | -1.7227195 | 5.8073974 | -1.3886006 |
| C | -0.9465197 | 4.0669459 | -0.3931559 |
| C | 3.8166299  | 0.7618988 | 0.2934939  |
| C | 4.9582586  | 1.4406976 | 0.6964818  |
| H | 5.8260454  | 0.8718988 | 1.0640557  |
| C | 5.0060736  | 2.8634832 | 0.7215638  |
| C | 6.1546233  | 3.5506830 | 1.2164257  |
| C | 3.8435589  | 3.6203860 | 0.3200059  |
| C | 3.8648169  | 5.0338946 | 0.5217249  |
| C | 2.7053042  | 2.9209902 | -0.2330809 |
| C | 2.7298802  | 1.5230746 | -0.2322349 |
| O | 0.1429140  | 2.2070464 | 0.6903998  |
| O | 1.6780045  | 0.8111758 | -0.7896648 |

|   |            |            |            |    |            |            |            |
|---|------------|------------|------------|----|------------|------------|------------|
| P | 0.2216909  | 0.7212778  | -0.0070310 | H  | 5.8030644  | -1.3296206 | -3.3856860 |
| O | -0.8278358 | 0.4926239  | -1.0731117 | H  | 6.3292352  | -1.4434896 | -1.6735415 |
| O | 0.3246639  | -0.2543439 | 1.1885947  | C  | 3.8025719  | -1.6399055 | -0.5349018 |
| C | 1.5962386  | 6.8587741  | -3.5332260 | C  | 1.9779144  | -0.4322119 | 3.9524439  |
| C | 2.7496502  | 6.0551083  | -3.3296981 | C  | 3.2515341  | -1.1418467 | 1.8195125  |
| H | -0.4784579 | 7.1811080  | -3.0031912 | H  | 5.3648865  | -0.0043850 | 3.1491041  |
| H | 1.6262275  | 7.6892528  | -4.2548358 | H  | 4.6525417  | -1.2367007 | 4.2346608  |
| H | 3.6256790  | 4.3895148  | -2.2742154 | C  | 4.1615988  | -1.1791817 | -1.9441915 |
| H | 3.6656420  | 6.2581092  | -3.9052799 | C  | 3.6334780  | -0.7047128 | 0.5177999  |
| C | 4.9903236  | 5.6706554  | 1.0255307  | C  | 3.1647521  | -0.1835179 | 3.0079082  |
| C | 6.1546743  | 4.9293826  | 1.3581136  | H  | 2.0706734  | -1.1115157 | -2.6468973 |
| H | 2.9706672  | 5.6232654  | 0.2795659  | H  | 1.0096437  | -0.3180169 | 3.4294370  |
| H | 4.9757206  | 6.7611441  | 1.1738797  | H  | 2.9514142  | -2.6151813 | -3.1015741 |
| H | 7.0442700  | 5.4472195  | 1.7475955  | H  | 1.1828167  | -5.3476485 | 0.5216209  |
| H | 7.0368510  | 2.9577672  | 1.5050656  | H  | 2.0052244  | -1.4358946 | 4.4238208  |
| C | -3.3443061 | 3.2824181  | -0.5624938 | H  | 5.0384026  | -5.5523914 | 0.3183459  |
| C | -2.2471614 | 3.6966820  | 0.2455519  | H  | 4.2460198  | -0.0736120 | -1.9104005 |
| C | -4.5770087 | 3.0131592  | 0.0614920  | H  | 3.0474621  | 0.8405538  | 2.5994743  |
| C | -2.4030563 | 3.7978969  | 1.6570745  | H  | 3.8533909  | -3.7423729 | -1.0636057 |
| C | -3.6590860 | 3.5210720  | 2.2233554  | Zn | -2.1221004 | -1.0335857 | -1.5445996 |
| C | -4.7666057 | 3.1392241  | 1.4472706  | Br | -1.4486656 | -0.3180169 | -3.7628619 |
| C | -1.2688986 | 4.2437598  | 2.5799733  | Zn | 0.5202209  | -2.1621784 | 1.3548866  |
| H | -3.7797139 | 3.6170210  | 3.3137801  | Br | -0.1167050 | -3.7065390 | 2.9586022  |
| C | -0.9226257 | 3.1651891  | 3.6227540  | H  | -5.4326795 | 2.6962912  | -0.5565998 |
| H | -1.7692125 | 2.9817122  | 4.3165178  | C  | -2.0655484 | -5.3137795 | -3.4744450 |
| H | -0.0519750 | 3.4802430  | 4.2350788  | C  | -1.5265046 | -4.4639717 | -2.5063673 |
| H | -0.6695018 | 2.2060914  | 3.1307871  | C  | -0.1200320 | -4.3568238 | -2.3668903 |
| C | -1.5904396 | 5.5953654  | 3.2445731  | C  | 0.7307568  | -5.0899836 | -3.2317251 |
| H | -0.3633259 | 4.4033118  | 1.9608324  | C  | 0.1865129  | -5.9274143 | -4.2084428 |
| H | -2.4827993 | 5.5237584  | 3.9006109  | C  | -1.2119067 | -6.0415193 | -4.3235878 |
| H | -1.7957795 | 6.3773652  | 2.4855173  | H  | -3.1566001 | -5.3953365 | -3.5851180 |
| H | -0.7408858 | 5.9377923  | 3.8714479  | C  | 0.4993689  | -3.5183240 | -1.3632096 |
| C | -6.1427773 | 2.9394862  | 2.0691624  | H  | 1.8229675  | -4.9904926 | -3.1273101 |
| C | -6.1235863 | 2.0305714  | 3.3079601  | H  | 0.8449658  | -6.4946312 | -4.8825956 |
| H | -7.1578170 | 1.8527455  | 3.6690030  | H  | -1.6421725 | -6.7030491 | -5.0914106 |
| H | -5.5664164 | 2.4998353  | 4.1463778  | O  | -0.1145260 | -2.8188282 | -0.5219199 |
| H | -5.6621444 | 1.0495927  | 3.0878061  | H  | -2.1785904 | -3.8687599 | -1.8536865 |
| C | -6.7825521 | 4.3063228  | 2.3838143  | H  | 1.6114415  | -3.5201590 | -1.3436126 |
| H | -6.7717201 | 2.4424483  | 1.2976726  | C  | -3.2238741 | -3.5374060 | 0.8704138  |
| H | -7.8100438 | 4.1803948  | 2.7844792  | C  | -3.6583770 | -2.2544394 | 0.8221198  |
| H | -6.8386561 | 4.9484766  | 1.4812896  | C  | -4.4106218 | -2.0150824 | 2.1019774  |
| H | -6.1872063 | 4.8521286  | 3.1459411  | O  | -4.4104048 | -3.1759791 | 2.8432872  |
| C | -3.2347231 | 3.1292351  | -2.0805754 | C  | -3.6887670 | -4.1851768 | 2.1373404  |
| C | -3.7778899 | 1.7808275  | -2.5768963 | O  | -4.9514756 | -1.0012437 | 2.4879793  |
| H | -3.5414120 | 1.6263855  | -3.6483900 | C  | -3.5811170 | -1.1812427 | -0.2038119 |
| H | -4.8769766 | 1.6942815  | -2.4539273 | H  | -4.3615728 | -5.0558186 | 1.9568545  |
| H | -3.3147651 | 0.9494387  | -2.0130284 | H  | -2.8400502 | -4.5343417 | 2.7666212  |
| C | -3.9356229 | 4.2877648  | -2.8157842 | H  | -3.6421900 | -0.1987979 | 0.3155419  |
| H | -2.1578734 | 3.1544571  | -2.3437653 | H  | -4.5164757 | -1.2274477 | -0.8104598 |
| H | -3.8140049 | 4.1888798  | -3.9144229 | H  | -2.6079103 | -4.0620639 | 0.1289890  |
| H | -3.5331690 | 5.2755355  | -2.5152673 |    |            |            |            |
| H | -5.0233156 | 4.2944828  | -2.5938503 |    |            |            |            |
| H | 2.7796292  | -5.0352446 | 2.3765303  |    |            |            |            |
| H | 5.5232444  | -2.8351432 | -2.4622353 |    |            |            |            |
| H | 4.4791527  | 0.5065839  | 4.6210577  |    |            |            |            |
| C | 3.1794101  | -4.9700066 | 1.3421316  |    |            |            |            |
| H | 3.2920131  | -1.0866007 | -3.9509029 |    |            |            |            |
| H | 2.1657184  | -6.8159161 | 0.7632158  |    |            |            |            |
| H | 1.9966244  | 0.3122879  | 4.7736777  |    |            |            |            |
| C | 3.2597901  | -3.4848780 | 1.0075717  |    |            |            |            |
| C | 5.5295814  | -1.7272305 | -2.3871443 |    |            |            |            |
| C | 2.2109924  | -5.7548014 | 0.4447949  |    |            |            |            |
| H | 2.5251543  | -5.7473624 | -0.6200838 |    |            |            |            |
| C | 3.6442600  | -3.0152932 | -0.2616129 |    |            |            |            |
| C | 4.4927517  | -0.2308669 | 3.7929289  |    |            |            |            |
| H | 5.2719135  | -5.0531836 | 2.0215064  |    |            |            |            |
| C | 3.0399211  | -2.5244803 | 2.0250444  |    |            |            |            |
| C | 4.5892867  | -5.5902634 | 1.3329436  |    |            |            |            |
| H | 4.5513527  | -6.6538801 | 1.6455915  |    |            |            |            |
| H | 2.7808262  | -2.8839332 | 3.0319971  |    |            |            |            |
| C | 3.0534321  | -1.5182166 | -2.9578412 |    |            |            |            |

### int1; COSMO

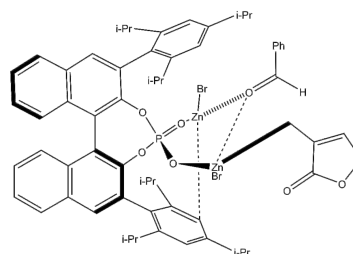

Energy (Hartree) = -11970.03810749

|   |           |           |           |
|---|-----------|-----------|-----------|
| C | 0.6913074 | 2.2096497 | 1.4829951 |
| C | 2.0843595 | 2.2835893 | 1.6281501 |
| C | 2.6923516 | 3.5904792 | 1.6950268 |
| C | 4.1046076 | 3.7896551 | 1.6339591 |
| C | 1.8429507 | 4.7512652 | 1.7997692 |
| C | 2.4371237 | 6.0451513 | 1.9042450 |

|   |            |            |            |    |            |            |            |
|---|------------|------------|------------|----|------------|------------|------------|
| C | 0.4294299  | 4.5886530  | 1.7670748  | H  | 0.4492227  | -6.2280634 | -4.2318530 |
| H | -0.2077900 | 5.4794309  | 1.8723433  | H  | 0.0619323  | -3.6462177 | 3.4780782  |
| C | -0.1679455 | 3.3503186  | 1.5569315  | C  | 2.0126474  | -4.5346025 | -1.5925770 |
| C | 3.3969092  | -1.2465887 | 0.8915593  | C  | 5.6147517  | -2.0668658 | -2.3769247 |
| C | 4.3627449  | -1.4002286 | 1.8769704  | C  | 0.7456849  | -5.3302382 | -3.6526584 |
| H | 4.9333719  | -2.3394584 | 1.9358517  | H  | 1.3295185  | -4.6741009 | -4.3319386 |
| C | 4.5767199  | -0.4032215 | 2.8711738  | C  | 2.8973468  | -3.5730257 | -2.1038222 |
| C | 5.5080220  | -0.6150836 | 3.9320680  | C  | 2.6189544  | -4.3402820 | 2.8077555  |
| C | 3.7799629  | 0.8010889  | 2.8550522  | H  | 3.3300896  | -6.9327615 | -1.8850324 |
| C | 3.8967383  | 1.6946101  | 3.9628128  | C  | 1.5724842  | -4.3806824 | -0.2516291 |
| C | 2.8836033  | 1.0335331  | 1.7443767  | C  | 2.7604575  | -6.6231553 | -2.7843252 |
| C | 2.7223118  | 0.0094701  | 0.8062642  | H  | 2.4178151  | -7.5388283 | -3.3079876 |
| O | 0.0834281  | 0.9655581  | 1.3354594  | H  | 0.9381895  | -5.1692203 | 0.1828001  |
| O | 1.8970665  | 0.2133615  | -0.2924360 | C  | 3.5838707  | -0.7226111 | -3.1356095 |
| P | 0.2577555  | 0.1618075  | -0.0950275 | H  | 6.2919549  | -1.7287471 | -2.7825629 |
| O | -0.3365400 | 0.9210575  | -1.2676801 | H  | 6.1211016  | -2.5483931 | -1.5158422 |
| O | -0.2164816 | -1.2660999 | 0.2309305  | C  | 3.3512155  | -2.4852160 | -1.3307983 |
| C | 3.8146201  | 6.2011187  | 1.8687805  | C  | 0.2206097  | -3.6620943 | 2.3810014  |
| C | 4.6514360  | 5.0629699  | 1.7159830  | C  | 2.0539157  | -3.3401524 | 0.5863167  |
| H | 1.7758922  | 6.9211868  | 1.9956883  | H  | 3.6896257  | -4.1168971 | 2.6338328  |
| H | 4.2607863  | 7.2046401  | 1.9414368  | H  | 2.4321645  | -5.3792481 | 2.4645502  |
| H | 4.7633963  | 2.9191311  | 1.5073622  | C  | 4.2689385  | -1.4452969 | -1.9616421 |
| H | 5.7429799  | 5.1916022  | 1.6560326  | C  | 2.9466573  | -2.3803517 | 0.0249112  |
| C | 4.7956039  | 1.4490880  | 4.9920105  | C  | 1.6929804  | -3.3478986 | 2.0724526  |
| C | 5.6253440  | 0.2965809  | 4.9701021  | H  | 2.6219551  | -0.2690205 | -2.8281102 |
| H | 3.2574900  | 2.5866265  | 4.0037093  | H  | -0.4561155 | -2.9063673 | 1.9379212  |
| H | 4.8603744  | 2.1531148  | 5.8356534  | H  | 3.3887070  | -1.4174459 | -3.9797241 |
| H | 6.3418040  | 0.1189282  | 5.7864650  | H  | -0.1827884 | -4.8000761 | -3.3632817 |
| H | 6.1176139  | -1.5323409 | 3.9201831  | H  | -0.0917334 | -4.6637067 | 2.0216401  |
| C | -2.2909537 | 3.7521924  | 0.2470266  | H  | 3.4608323  | -6.0915600 | -3.4619904 |
| C | -1.6498927 | 3.2105925  | 1.3983077  | H  | 4.4845762  | -0.6833070 | -1.1846100 |
| C | -3.6875991 | 3.6148307  | 0.1252178  | H  | 1.8984370  | -2.3329748 | 2.4675273  |
| C | -2.4210516 | 2.5489969  | 2.3963526  | H  | 3.2387385  | -3.6599176 | -3.1472989 |
| C | -3.8140041 | 2.4529096  | 2.2278841  | Zn | -1.5197495 | 0.6959974  | -2.9150914 |
| C | -4.4709883 | 2.9728996  | 1.0981299  | Br | 0.0237623  | 1.1255031  | -4.6522826 |
| C | -1.7915869 | 1.9727423  | 3.6643126  | Zn | -0.2523312 | -2.9112448 | -0.8354000 |
| H | -4.4068998 | 1.9480957  | 3.0075781  | Br | -1.9962721 | -4.4488604 | -0.7555497 |
| C | -2.0243827 | 0.4558224  | 3.7884120  | H  | -4.1910438 | 4.0277035  | -0.7639047 |
| H | -3.1042573 | 0.2142008  | 3.8785214  | C  | -3.3967603 | -2.8605420 | -4.7791583 |
| H | -1.5199396 | 0.0576250  | 4.6929671  | C  | -2.2696940 | -2.5923322 | -3.9973879 |
| H | -1.6178556 | -0.0797494 | 2.9086224  | C  | -1.0307194 | -2.3056937 | -4.6186582 |
| C | -2.2802683 | 2.7259311  | 4.9156577  | C  | -0.9351222 | -2.2888911 | -6.0326644 |
| H | -0.6959924 | 2.1313209  | 3.6025657  | C  | -2.0604617 | -2.5721905 | -6.8102249 |
| H | -3.3735555 | 2.6023585  | 5.0631406  | C  | -3.2898660 | -2.8549064 | -6.1824537 |
| H | -2.0728227 | 3.8124761  | 4.8369325  | H  | -4.3560759 | -3.0502802 | -4.2773059 |
| H | -1.7739040 | 2.3435262  | 5.8260509  | C  | 0.1644642  | -2.0064690 | -3.8444889 |
| C | -5.9826068 | 2.8661610  | 0.9393189  | H  | 0.0265309  | -2.0381838 | -6.5067536 |
| C | -6.4686623 | 1.4063340  | 0.9439682  | H  | -1.9904267 | -2.5614135 | -7.9081334 |
| H | -7.5610883 | 1.3555205  | 0.7581799  | H  | -4.1793072 | -3.0644288 | -6.7968447 |
| H | -6.2778660 | 0.9195179  | 1.9236444  | O  | 0.2621587  | -2.0475615 | -2.5983422 |
| H | -5.9561695 | 0.8088430  | 0.1642861  | H  | -2.3487706 | -2.6070625 | -2.9013799 |
| C | -6.7136096 | 3.7035181  | 2.0051543  | H  | 1.0782744  | -1.7412007 | -4.4254491 |
| H | -6.2306483 | 3.2974130  | -0.0554234 | C  | -3.2478647 | -0.1842582 | 0.0375177  |
| H | -7.8118229 | 3.6697108  | 1.8494701  | C  | -3.6545937 | -0.3792173 | -1.2447594 |
| H | -6.3928480 | 4.7644988  | 1.9755462  | C  | -4.4922006 | -1.6192102 | -1.2428834 |
| H | -6.5075387 | 3.3181473  | 3.0259453  | O  | -4.5603080 | -2.1082782 | 0.0390259  |
| C | -1.5224623 | 4.5075249  | -0.8385462 | C  | -3.7703600 | -1.2827167 | 0.9022572  |
| C | -1.8595575 | 4.0356495  | -2.2596269 | O  | -5.0692684 | -2.1618541 | -2.1689786 |
| H | -1.2056274 | 4.5305790  | -3.0049169 | C  | -3.4413971 | 0.4225463  | -2.4719436 |
| H | -2.9117845 | 4.2436269  | -2.5419185 | H  | -2.9558871 | -1.9044465 | 1.3402425  |
| H | -1.6956066 | 2.9452683  | -2.3540117 | H  | -4.4076477 | -0.9198237 | 1.7393660  |
| C | -1.7490754 | 6.0271456  | -0.7136266 | H  | -3.8173384 | 1.4588361  | -2.3267296 |
| H | -0.4427698 | 4.3094580  | -0.6847422 | H  | -3.9905357 | -0.0268322 | -3.3228459 |
| H | -1.1493489 | 6.5776348  | -1.4676428 | H  | -2.6458306 | 0.6486075  | 0.4215640  |
| H | -1.4695075 | 6.4062332  | 0.2894931  |    |            |            |            |
| H | -2.8174312 | 6.2806977  | -0.8773752 |    |            |            |            |
| H | 0.8836292  | -6.3293424 | -1.7595837 |    |            |            |            |
| H | 5.4822216  | -2.8370621 | -3.1654742 |    |            |            |            |
| H | 2.4340130  | -4.3031501 | 3.9006050  |    |            |            |            |
| C | 1.5588140  | -5.7351913 | -2.4122859 |    |            |            |            |
| H | 4.2356976  | 0.0866071  | -3.5230362 |    |            |            |            |

int1

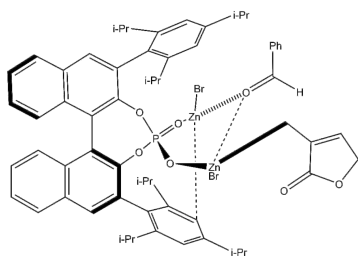

Energy (Hartree) = -11970.0242618

|   |            |            |            |
|---|------------|------------|------------|
| C | 0.7094639  | 2.2080191  | 1.5175628  |
| C | 2.1028202  | 2.2821811  | 1.6601493  |
| C | 2.7112176  | 3.5889820  | 1.7255100  |
| C | 4.1233195  | 3.7879877  | 1.6650497  |
| C | 1.8626885  | 4.7508927  | 1.8265494  |
| C | 2.4582202  | 6.0438277  | 1.9293739  |
| C | 0.4494563  | 4.5897480  | 1.7860246  |
| H | -0.1893929 | 5.4819259  | 1.8747518  |
| C | -0.1482274 | 3.3507858  | 1.5799202  |
| C | 3.4102888  | -1.2450203 | 0.8988811  |
| C | 4.3832427  | -1.4014576 | 1.8767441  |
| H | 4.9543787  | -2.3409978 | 1.9264232  |
| C | 4.6042554  | -0.4098680 | 2.8743453  |
| C | 5.5431012  | -0.6251056 | 3.9272629  |
| C | 3.8070846  | 0.7939880  | 2.8691195  |
| C | 3.9321932  | 1.6828459  | 3.9794776  |
| C | 2.9021963  | 1.0312172  | 1.7666769  |
| C | 2.7334457  | 0.0112130  | 0.8245505  |
| O | 0.1010619  | 0.9640931  | 1.3808087  |
| O | 1.8975677  | 0.2176186  | -0.2639001 |
| P | 0.2612803  | 0.1450388  | -0.0437493 |
| O | -0.3704453 | 0.8694724  | -1.2145177 |
| O | -0.1788974 | -1.2878812 | 0.3151735  |
| C | 3.8352852  | 6.1991220  | 1.8964354  |
| C | 4.6709350  | 5.0605299  | 1.7464592  |
| H | 1.7972920  | 6.9204457  | 2.0172768  |
| H | 4.2817700  | 7.2025017  | 1.9681720  |
| H | 4.7809611  | 2.9165626  | 1.5400968  |
| H | 5.7626250  | 5.1879239  | 1.6875695  |
| C | 4.8389736  | 1.4338078  | 5.0002211  |
| C | 5.6683947  | 0.2820073  | 4.9676312  |
| H | 3.2928858  | 2.5743883  | 4.0271590  |
| H | 4.9101952  | 2.1348301  | 5.8457754  |
| H | 6.3912153  | 0.1011597  | 5.7775901  |
| H | 6.1527796  | -1.5421979 | 3.9071372  |
| C | -2.2403840 | 3.7711721  | 0.2315441  |
| C | -1.6252150 | 3.2130112  | 1.3888641  |
| C | -3.6291515 | 3.6073956  | 0.0624651  |
| C | -2.4176391 | 2.5294642  | 2.3548897  |
| C | -3.8029581 | 2.4178244  | 2.1437727  |
| C | -4.4324186 | 2.9372214  | 0.9986538  |
| C | -1.8211572 | 1.9551626  | 3.6397787  |
| H | -4.4122589 | 1.8987129  | 2.9006485  |
| C | -2.0615636 | 0.4401383  | 3.7695560  |
| H | -3.1438527 | 0.2011770  | 3.8349257  |
| H | -1.5818621 | 0.0475919  | 4.6898153  |
| H | -1.6347864 | -0.1047489 | 2.9052906  |
| C | -2.3381236 | 2.7190958  | 4.8732477  |
| H | -0.7238905 | 2.1097049  | 3.6040982  |
| H | -3.4356054 | 2.6029402  | 4.9922808  |
| H | -2.1237974 | 3.8039495  | 4.7924347  |
| H | -1.8586272 | 2.3409487  | 5.7998395  |
| C | -5.9388179 | 2.8280060  | 0.7973783  |
| C | -6.4598505 | 1.3882444  | 0.9376691  |
| H | -7.5449620 | 1.3413506  | 0.7136076  |
| H | -6.3230932 | 1.0034797  | 1.9702339  |

|    |            |            |            |
|----|------------|------------|------------|
| H  | -5.9345008 | 0.6997157  | 0.2475683  |
| C  | -6.6826801 | 3.7879089  | 1.7455622  |
| H  | -6.1459828 | 3.1574627  | -0.2447698 |
| H  | -7.7771976 | 3.7559792  | 1.5652213  |
| H  | -6.3400771 | 4.8338341  | 1.6124872  |
| H  | -6.5069689 | 3.5108304  | 2.8063609  |
| C  | -1.4672952 | 4.5796413  | -0.8123812 |
| C  | -1.5856609 | 4.0060770  | -2.2322615 |
| H  | -1.0436922 | 4.6409339  | -2.9619599 |
| H  | -2.6372632 | 3.9244681  | -2.5760379 |
| H  | -1.1153944 | 3.0050431  | -2.2768981 |
| C  | -1.8913634 | 6.0605945  | -0.7715419 |
| H  | -0.3924227 | 4.5369096  | -0.5489382 |
| H  | -1.2799256 | 6.6639215  | -1.4738319 |
| H  | -1.7735272 | 6.4903428  | 0.2442127  |
| H  | -2.9560279 | 6.1846315  | -1.0598203 |
| H  | 0.8986671  | -6.3195540 | -1.7698885 |
| H  | 5.4498262  | -2.7657997 | -3.1961490 |
| H  | 2.5266113  | -4.3708092 | 3.8870534  |
| C  | 1.5597015  | -5.7132598 | -2.4260637 |
| H  | 4.1571469  | 0.1446598  | -3.5236870 |
| H  | 0.4216945  | -6.1944183 | -4.2318507 |
| H  | 0.1468187  | -3.7155615 | 3.5131433  |
| C  | 2.0179040  | -4.5192628 | -1.5984874 |
| C  | 5.5792805  | -1.9966147 | -2.4060691 |
| C  | 0.7217306  | -5.3013404 | -3.6471651 |
| H  | 1.2880409  | -4.6333063 | -4.3298564 |
| C  | 2.8797726  | -3.5395129 | -2.1142745 |
| C  | 2.6915121  | -4.3904705 | 2.7905082  |
| H  | 3.3481878  | -6.9042648 | -1.9425587 |
| C  | 1.6071060  | -4.3902990 | -0.2474803 |
| C  | 2.7611918  | -6.5879865 | -2.8281703 |
| H  | 2.4188493  | -7.4999497 | -3.3585217 |
| H  | 0.9787536  | -5.1843994 | 0.1850016  |
| C  | 3.5215720  | -0.6761031 | -3.1338563 |
| H  | 6.2410686  | -1.2067899 | -2.8164483 |
| H  | 6.1026783  | -2.4750060 | -1.5535936 |
| C  | 3.3355891  | -2.4561018 | -1.3370035 |
| C  | 0.2865499  | -3.7051697 | 2.4133315  |
| C  | 2.0901271  | -3.3553517 | 0.5937023  |
| H  | 3.7593831  | -4.1654890 | 2.6014870  |
| H  | 2.4994150  | -5.4245229 | 2.4356023  |
| C  | 4.2289410  | -1.3974957 | -1.9728552 |
| C  | 2.9585760  | -2.3754155 | 0.0283528  |
| C  | 1.7541241  | -3.3871100 | 2.0857122  |
| H  | 2.5575296  | -0.2357576 | -2.8147023 |
| H  | -0.3948846 | -2.9371096 | 2.0004136  |
| H  | 3.3274525  | -1.3668835 | -3.9817298 |
| H  | -0.2055709 | -4.7823027 | -3.3355998 |
| H  | -0.0376293 | -4.6959025 | 2.0350490  |
| H  | 3.4478483  | -6.0429404 | -3.5091917 |
| H  | 4.4422497  | -0.6374526 | -1.1933717 |
| H  | 1.9662211  | -2.3787038 | 2.4934770  |
| H  | 3.1999143  | -3.6072334 | -3.1659587 |
| Zn | -1.5890471 | 0.7248532  | -2.8587350 |
| Br | -0.0397436 | 1.0964806  | -4.5994563 |
| Zn | -0.2845748 | -2.8983893 | -0.7902172 |
| Br | -1.9680434 | -4.4877028 | -0.6955255 |
| H  | -4.1112498 | 4.0298381  | -0.8347219 |
| C  | -3.4602126 | -2.8703224 | -4.6901729 |
| C  | -2.3264028 | -2.5906010 | -3.9214657 |
| C  | -1.0985212 | -2.2885364 | -4.5556931 |
| C  | -1.0203578 | -2.2671230 | -5.9703573 |
| C  | -2.1503329 | -2.5629635 | -6.7351480 |
| C  | -3.3687243 | -2.8612831 | -6.0936884 |
| H  | -4.4114732 | -3.0661112 | -4.1754538 |
| C  | 0.1044660  | -1.9812843 | -3.7946516 |
| H  | -0.0687621 | -1.9973778 | -6.4542395 |
| H  | -2.0935557 | -2.5469450 | -7.8338330 |
| H  | -4.2630717 | -3.0788254 | -6.6982358 |
| O  | 0.2219305  | -2.0341378 | -2.5507531 |



|   |            |            |            |
|---|------------|------------|------------|
| H | -2.3918294 | -2.6085431 | -2.8244423 |
| H | 1.0101025  | -1.7119608 | -4.3863478 |
| C | -3.2633860 | -0.3030977 | 0.0958614  |
| C | -3.6997524 | -0.3913521 | -1.1881462 |
| C | -4.5653740 | -1.6131019 | -1.2629126 |
| O | -4.6239935 | -2.1912072 | -0.0173217 |
| C | -3.8050846 | -1.4478170 | 0.8882645  |
| O | -5.1629106 | -2.0718551 | -2.2182198 |
| C | -3.4987413 | 0.4946949  | -2.3571842 |
| H | -3.0037986 | -2.1196095 | 1.2749082  |
| H | -4.4244756 | -1.1244590 | 1.7558225  |
| H | -3.8180304 | 1.5314531  | -2.1129503 |
| H | -4.1015900 | 0.1355041  | -3.2146266 |
| H | -2.6392133 | 0.4877779  | 0.5289514  |

|   |            |            |            |
|---|------------|------------|------------|
| H | -3.7880714 | -6.5621542 | 4.3713280  |
| H | -4.3088186 | -3.7472281 | 1.1151170  |
| H | -4.9790390 | -5.8286261 | 2.2789076  |
| C | -6.5554797 | -0.8771903 | 1.9277792  |
| C | -7.2050516 | -0.5111923 | 0.7183274  |
| H | -4.7084411 | -1.4563572 | 2.8807486  |
| H | -7.1277109 | -0.9086420 | 2.8675628  |
| H | -8.2797095 | -0.2733012 | 0.7228581  |
| H | -6.9654309 | -0.1280192 | -1.3995266 |
| C | 2.1285107  | -1.6083273 | 3.5352689  |
| C | 0.8437814  | -1.0921488 | 3.8660622  |
| C | 3.2590352  | -0.8123064 | 3.8032696  |
| C | 0.7222794  | 0.1751956  | 4.4990601  |
| C | 1.8850639  | 0.9244154  | 4.7505477  |
| C | 3.1633848  | 0.4600437  | 4.3933648  |
| H | 4.2590205  | -1.1909737 | 3.5414255  |
| C | -0.6311241 | 0.7019651  | 4.9745380  |
| H | 1.7867072  | 1.9057527  | 5.2420909  |
| C | -0.9668686 | 2.0968897  | 4.4277873  |
| H | -0.2424282 | 2.8635718  | 4.7737425  |
| H | -1.9742189 | 2.4165065  | 4.7638817  |
| H | -0.9751672 | 2.1074662  | 3.3213103  |
| C | -0.7032073 | 0.6678953  | 6.5135946  |
| H | -1.4116308 | 0.0086812  | 4.5995354  |
| H | 0.0409840  | 1.3572960  | 6.9650172  |
| H | -0.4979948 | -0.3497213 | 6.9042995  |
| H | -1.7085429 | 0.9775264  | 6.8671075  |
| C | 4.4131642  | 1.2882030  | 4.6666599  |
| C | 4.3872900  | 2.6346611  | 3.9226132  |
| H | 5.3138089  | 3.2119426  | 4.1236794  |
| H | 3.5269704  | 3.2574155  | 4.2452107  |
| H | 4.3038521  | 2.4877030  | 2.8276696  |
| C | 4.6355944  | 1.4873556  | 6.1771850  |
| H | 5.2745939  | 0.7072947  | 4.2704285  |
| H | 5.5849868  | 2.0292874  | 6.3689218  |
| H | 4.6789926  | 0.5162670  | 6.7108084  |
| H | 3.8139172  | 2.0820951  | 6.6288806  |
| C | 2.3085446  | -3.0213318 | 2.9780652  |
| C | 3.3663500  | -3.1436141 | 1.8704342  |
| H | 3.4572327  | -4.2000500 | 1.5449076  |
| H | 4.3719674  | -2.8140872 | 2.2011645  |
| H | 3.0822935  | -2.5475411 | 0.9826269  |
| C | 2.6340834  | -3.9954924 | 4.1300721  |
| H | 1.3390212  | -3.3322356 | 2.5369707  |
| H | 2.6918386  | -5.0406687 | 3.7612226  |
| H | 1.8690034  | -3.9554394 | 4.9304398  |
| H | 3.6106416  | -3.7412971 | 4.5934398  |
| H | 0.2688251  | 1.1273247  | -6.7425081 |
| H | -1.8559053 | -4.0951047 | -4.9967310 |
| H | -4.2914037 | 3.3290529  | -3.0103894 |
| C | 0.1231010  | 0.0300829  | -6.6370135 |
| H | -0.3501026 | -4.7173501 | -2.2487673 |
| H | 2.0783845  | -0.3435026 | -7.5495260 |
| H | -1.9823571 | 3.9335862  | -2.0819371 |
| C | -0.6360306 | -0.1863631 | -5.3334918 |
| C | -2.3866744 | -3.9999112 | -4.0263154 |
| C | 1.5163387  | -0.6187846 | -6.6333439 |
| H | 1.4540286  | -1.7265510 | -6.6057062 |
| C | -0.7471902 | -1.4581166 | -4.7458072 |
| C | -3.8459708 | 2.4669669  | -3.5484676 |
| H | -1.6992824 | 0.0707986  | -7.8689210 |
| C | -1.2751066 | 0.8855748  | -4.6899817 |
| C | -0.7158001 | -0.4401135 | -7.8408362 |
| H | -0.1915112 | -0.2355578 | -8.7977729 |
| H | -1.1931985 | 1.8904654  | -5.1342853 |
| C | -0.2316930 | -3.7098755 | -2.6989746 |
| H | -2.5158698 | -5.0216470 | -3.6125579 |
| H | -3.3932372 | -3.5832023 | -4.2339415 |
| C | -1.4884991 | -1.6786233 | -3.5710503 |
| C | -1.5554886 | 3.1116012  | -2.6907767 |
| C | -1.9941795 | 0.7326870  | -3.4891359 |

## 7.10 Interconversion of Complexes 14 - Mechanism 3

### 7.10.1 Pathway 14j-ma ↔ 14d-mi

TS1; COSMO

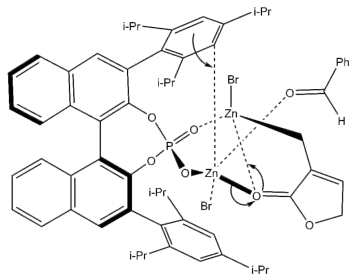

Energy (Hartree) = -11970.01414914

|    |            |            |            |
|----|------------|------------|------------|
| Zn | 2.9746581  | -0.0528695 | 0.0097531  |
| Br | 5.1222228  | 0.3940366  | 0.6693105  |
| Zn | -0.3085313 | 2.8030346  | 0.7887195  |
| Br | -2.6174024 | 3.1850070  | 0.8845075  |
| C  | -1.1502638 | -1.3853482 | 2.3585104  |
| C  | -2.3005997 | -2.0175017 | 1.8789791  |
| C  | -2.7128129 | -3.2433283 | 2.5201766  |
| C  | -3.7810433 | -4.0533147 | 2.0288745  |
| C  | -1.9946869 | -3.6969378 | 3.6883630  |
| C  | -2.4148374 | -4.8931351 | 4.3442687  |
| C  | -0.8582305 | -2.9696024 | 4.1468664  |
| H  | -0.3227585 | -3.3303200 | 5.0381567  |
| C  | -0.3942282 | -1.8417027 | 3.4825699  |
| C  | -2.9432686 | -0.7857966 | -1.7016562 |
| C  | -4.3208132 | -0.5962810 | -1.6788459 |
| H  | -4.8380982 | -0.3071932 | -2.6059767 |
| C  | -5.0816218 | -0.7275301 | -0.4822876 |
| C  | -6.4784988 | -0.4346180 | -0.4604059 |
| C  | -4.4304167 | -1.1407200 | 0.7375408  |
| C  | -5.2022404 | -1.1860642 | 1.9368425  |
| C  | -3.0240567 | -1.4545077 | 0.7032947  |
| C  | -2.3287322 | -1.2040796 | -0.4836316 |
| O  | -0.7149631 | -0.2183003 | 1.7362761  |
| O  | -0.9476387 | -1.4174686 | -0.5119349 |
| P  | -0.0182091 | -0.3094392 | 0.2490672  |
| O  | 1.3700158  | -1.0009842 | 0.3454727  |
| O  | -0.0444620 | 1.0905811  | -0.3377287 |
| C  | -3.4778547 | -5.6392552 | 3.8579280  |
| C  | -4.1543143 | -5.2205915 | 2.6811807  |
| H  | -1.8653116 | -5.2204178 | 5.2410311  |

|   |            |            |            |
|---|------------|------------|------------|
| H | -4.6193891 | 1.6763038  | -3.6234556 |
| H | -3.6072543 | 2.7965435  | -4.5821968 |
| C | -1.6064721 | -3.1079260 | -3.0425181 |
| C | -2.1275006 | -0.5739521 | -2.9388297 |
| C | -2.5822831 | 1.9736889  | -2.8192936 |
| H | 0.3086835  | -3.0706759 | -1.9738706 |
| H | -0.6324031 | 2.7699145  | -2.1849528 |
| H | 0.4013461  | -3.8236656 | -3.6040447 |
| H | 2.1092700  | -0.2891213 | -5.7558615 |
| H | -1.2742140 | 3.5381958  | -3.6772283 |
| H | -0.9074427 | -1.5325422 | -7.7852602 |
| H | -2.1950606 | -3.0790345 | -2.1037352 |
| H | -2.8704044 | 1.6979377  | -1.7844675 |
| H | -0.2565426 | -2.3180912 | -5.2287906 |
| C | 1.7333591  | 3.0946656  | -5.2575643 |
| C | 1.9611750  | 2.3380322  | -4.1065542 |
| C | 3.2881922  | 1.9679830  | -3.7734538 |
| C | 4.3710261  | 2.3489224  | -4.6035314 |
| C | 4.1284002  | 3.0859166  | -5.7670285 |
| C | 2.8105227  | 3.4626939  | -6.0876111 |
| H | 0.7107587  | 3.4087114  | -5.5136159 |
| H | 1.1411689  | 2.0373282  | -3.4403411 |
| C | 3.5595518  | 1.2287794  | -2.5553495 |
| H | 5.3975233  | 2.0606027  | -4.3262108 |
| H | 4.9622109  | 3.3796178  | -6.4217562 |
| H | 2.6200550  | 4.0559939  | -6.9954226 |
| O | 2.6583398  | 0.7851635  | -1.8147361 |
| H | 4.6330672  | 1.0770422  | -2.2724274 |
| C | 3.1142637  | 5.1336622  | 1.4339872  |
| C | 2.2735668  | 4.1527052  | 1.0106004  |
| C | 2.2509054  | 4.2310061  | -0.4769896 |
| O | 3.1249306  | 5.1947514  | -0.9023875 |
| C | 3.6937007  | 5.8407170  | 0.2482822  |
| O | 1.5500930  | 3.5950712  | -1.2497945 |
| C | 1.4425037  | 3.1524588  | 1.7075206  |
| H | 3.4352512  | 6.9230733  | 0.2028339  |
| H | 4.8033773  | 5.7626617  | 0.1968816  |
| H | 1.3443712  | 3.3755366  | 2.7862144  |
| H | 1.9275472  | 2.1482487  | 1.6393081  |
| H | 3.3689389  | 5.3878978  | 2.4722588  |

### TS1

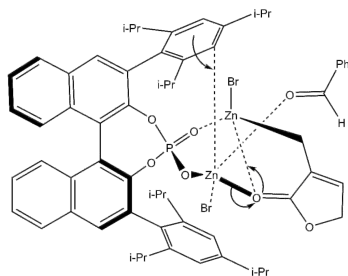

Energy (Hartree) = -11969.99840653  
 number of imaginary frequencies: 3

|    |            |            |            |
|----|------------|------------|------------|
| Zn | 3.0054133  | -0.0825962 | 0.1228664  |
| Br | 5.2165055  | 0.1903924  | 0.6339258  |
| Zn | -0.4052470 | 2.8621390  | 0.8068471  |
| Br | -2.7173080 | 3.1922835  | 0.8733357  |
| C  | -1.1811732 | -1.3851027 | 2.3871897  |
| C  | -2.3209526 | -2.0238542 | 1.8923925  |
| C  | -2.7292536 | -3.2558156 | 2.5246544  |
| C  | -3.7869934 | -4.0711869 | 2.0205944  |
| C  | -2.0187371 | -3.7094953 | 3.6975367  |
| C  | -2.4376111 | -4.9104688 | 4.3443817  |
| C  | -0.8874376 | -2.9803259 | 4.1657401  |
| H  | -0.3503734 | -3.3467164 | 5.0538005  |
| C  | -0.4253814 | -1.8476721 | 3.5091481  |
| C  | -2.9202123 | -0.7804624 | -1.6912960 |

|   |            |            |            |
|---|------------|------------|------------|
| C | -4.3001360 | -0.6095111 | -1.6893537 |
| H | -4.8048035 | -0.3222630 | -2.6238018 |
| C | -5.0788326 | -0.7550416 | -0.5066879 |
| C | -6.4788330 | -0.4792617 | -0.5060162 |
| C | -4.4425453 | -1.1649425 | 0.7216921  |
| C | -5.2328695 | -1.2239379 | 1.9079728  |
| C | -3.0323343 | -1.4621386 | 0.7087757  |
| C | -2.3203747 | -1.1978679 | -0.4658388 |
| O | -0.7533853 | -0.2065069 | 1.7832072  |
| O | -0.9360674 | -1.3943146 | -0.4725036 |
| P | -0.0388415 | -0.2698356 | 0.3042398  |
| O | 1.3564269  | -0.9455353 | 0.4199750  |
| O | -0.0921952 | 1.1300650  | -0.2765970 |
| C | -3.4909235 | -5.6613998 | 3.8459900  |
| C | -4.1586652 | -5.2428222 | 2.6650268  |
| H | -1.8937558 | -5.2378983 | 5.2445262  |
| H | -3.7997310 | -6.5880845 | 4.3532770  |
| H | -4.3078390 | -3.7642284 | 1.1033317  |
| H | -4.9757113 | -5.8543820 | 2.2527090  |
| C | -6.5890260 | -0.9317871 | 1.8778152  |
| C | -7.2232147 | -0.5692704 | 0.6598701  |
| H | -4.7502124 | -1.4908302 | 2.8584263  |
| H | -7.1755820 | -0.9729330 | 2.8082547  |
| H | -8.3003371 | -0.3434360 | 0.6479075  |
| H | -6.9535351 | -0.1732257 | -1.4514798 |
| C | 2.0956545  | -1.6271972 | 3.5060441  |
| C | 0.8228076  | -1.1050857 | 3.8714681  |
| C | 3.2334641  | -0.8237207 | 3.7144049  |
| C | 0.7217645  | 0.1720988  | 4.4868139  |
| C | 1.8905075  | 0.9302736  | 4.6756542  |
| C | 3.1556965  | 0.4621856  | 4.2785302  |
| H | 4.2248812  | -1.2078204 | 3.4290370  |
| C | -0.6154878 | 0.6998120  | 5.0049307  |
| H | 1.8075672  | 1.9216905  | 5.1494250  |
| C | -0.9997228 | 2.0683503  | 4.4244158  |
| H | -0.2704668 | 2.8563980  | 4.7056047  |
| H | -1.9929704 | 2.3880971  | 4.7993886  |
| H | -1.0662293 | 2.0394813  | 3.3202269  |
| C | -0.6149438 | 0.7225069  | 6.5458946  |
| H | -1.4005940 | -0.0193583 | 4.6930647  |
| H | 0.1359326  | 1.4406737  | 6.9372067  |
| H | -0.3727097 | -0.2754461 | 6.9645876  |
| H | -1.6080666 | 1.0289554  | 6.9345946  |
| C | 4.4133467  | 1.2967581  | 4.4898206  |
| C | 4.3618014  | 2.6269342  | 3.7190545  |
| H | 5.2954186  | 3.2068720  | 3.8738007  |
| H | 3.5130295  | 3.2583359  | 4.0544420  |
| H | 4.2445079  | 2.4582828  | 2.6303422  |
| C | 4.6869267  | 1.5271475  | 5.9872953  |
| H | 5.2608804  | 0.7082819  | 4.0756133  |
| H | 5.6423492  | 2.0718497  | 6.1359474  |
| H | 4.7473764  | 0.5675084  | 6.5391040  |
| H | 3.8815221  | 2.1314973  | 6.4549377  |
| C | 2.2582742  | -3.0547595 | 2.9815148  |
| C | 3.2733928  | -3.2114693 | 1.8390432  |
| H | 3.3546662  | -4.2777224 | 1.5447175  |
| H | 4.2908694  | -2.8700077 | 2.1172411  |
| H | 2.9498418  | -2.6489733 | 0.9422776  |
| C | 2.6260232  | -3.9918686 | 4.1512591  |
| H | 1.2738987  | -3.3799312 | 2.5866634  |
| H | 2.6715695  | -5.0484417 | 3.8147682  |
| H | 1.8898948  | -3.9250570 | 4.9765808  |
| H | 3.6176273  | -3.7232416 | 4.5722463  |
| H | 0.3152695  | 1.1892556  | -6.6960874 |
| H | -1.7546526 | -4.0652561 | -4.9795564 |
| H | -4.3012021 | 3.3205151  | -2.9557406 |
| C | 0.1492056  | 0.0927646  | -6.6136810 |
| H | -0.2494956 | -4.6650754 | -2.2224411 |
| H | 2.0835656  | -0.2895412 | -7.5659783 |
| H | -1.9989850 | 3.9544883  | -2.0441974 |
| C | -0.5969774 | -0.1379354 | -5.3050402 |



|   |            |            |            |
|---|------------|------------|------------|
| C | -2.2902878 | -3.9805029 | -4.0109351 |
| C | 1.5291056  | -0.5818367 | -6.6505313 |
| H | 1.4468669  | -1.6885215 | -6.6567922 |
| C | -0.6898647 | -1.4115429 | -4.7195116 |
| C | -3.8485535 | 2.4684672  | -3.5030453 |
| H | -1.6922087 | 0.1994386  | -7.8124679 |
| C | -1.2513090 | 0.9233868  | -4.6593060 |
| C | -0.7190467 | -0.3311677 | -7.8139933 |
| H | -0.2075084 | -0.1156259 | -8.7754637 |
| H | -1.1830421 | 1.9305485  | -5.1007603 |
| C | -0.1467502 | -3.6558065 | -2.6721817 |
| H | -2.4041143 | -5.0051311 | -3.5999803 |
| H | -3.3024844 | -3.5803152 | -4.2225458 |
| C | -1.4327709 | -1.6453169 | -3.5482852 |
| C | -1.5634719 | 3.1441323  | -2.6621162 |
| C | -1.9716124 | 0.7584341  | -3.4613266 |
| H | -4.6116039 | 1.6680153  | -3.5758976 |
| H | -3.6234255 | 2.8058094  | -4.5373509 |
| C | -1.5297153 | -3.0771167 | -3.0224557 |
| C | -2.0915138 | -0.5522398 | -2.9170885 |
| C | -2.5727998 | 1.9898373  | -2.7856555 |
| H | 0.3792542  | -3.0081420 | -1.9441341 |
| H | -0.6289617 | 2.8161954  | -2.1672183 |
| H | 0.4933116  | -3.7585082 | -3.5735953 |
| H | 2.1411416  | -0.2916967 | -5.7723669 |
| H | -1.2998364 | 3.5817776  | -3.6488485 |
| H | -0.9334285 | -1.4200191 | -7.7792677 |
| H | -2.1234018 | -3.0592876 | -2.0867387 |
| H | -2.8503538 | 1.7100939  | -1.7489392 |
| H | -0.1841369 | -2.2633039 | -5.2010416 |
| C | 1.7552595  | 3.0655115  | -5.1494287 |
| C | 1.9823537  | 2.2967019  | -4.0061839 |
| C | 3.2998211  | 1.8622362  | -3.7170295 |
| C | 4.3710836  | 2.1876846  | -4.5845556 |
| C | 4.1273110  | 2.9356966  | -5.7399959 |
| C | 2.8201639  | 3.3793755  | -6.0151841 |
| H | 0.7410766  | 3.4303094  | -5.3677166 |
| H | 1.1708608  | 2.0367446  | -3.3135510 |
| C | 3.5756496  | 1.1198108  | -2.5012203 |
| H | 5.3907719  | 1.8487440  | -4.3409586 |
| H | 4.9519633  | 3.1867032  | -6.4233775 |
| H | 2.6296050  | 3.9828256  | -6.9163369 |
| O | 2.6828417  | 0.7312223  | -1.7231270 |
| H | 4.6501938  | 0.9168470  | -2.2518738 |
| C | 3.0296315  | 5.2308635  | 1.4525432  |
| C | 2.1866839  | 4.2393960  | 1.0590661  |
| C | 2.2728152  | 4.1834885  | -0.4289236 |
| O | 3.2047071  | 5.0846057  | -0.8724703 |
| C | 3.7119696  | 5.8135088  | 0.2532081  |
| O | 1.6164387  | 3.4938042  | -1.1920083 |
| C | 1.2837741  | 3.3288883  | 1.7887011  |
| H | 3.4940978  | 6.8948845  | 0.0953533  |
| H | 4.8200039  | 5.7019516  | 0.2887114  |
| H | 1.1008243  | 3.6773070  | 2.8227945  |
| H | 1.7591981  | 2.3221442  | 1.8776491  |
| H | 3.2197719  | 5.5689470  | 2.4806779  |

|    |            |            |            |
|----|------------|------------|------------|
| Br | 5.1588471  | -0.7033107 | 1.4493551  |
| Zn | -0.6509456 | 1.5696266  | 2.4068113  |
| Br | -2.9877174 | 1.4372526  | 2.5780666  |
| C  | -1.4191752 | -2.5180569 | 0.6251546  |
| C  | -2.3544058 | -2.7338514 | -0.3915012 |
| C  | -2.6718025 | -4.0994266 | -0.7381861 |
| C  | -3.4841690 | -4.4467865 | -1.8599943 |
| C  | -2.1189138 | -5.1706370 | 0.0574717  |
| C  | -2.4611182 | -6.5212842 | -0.2531875 |
| C  | -1.1920946 | -4.8707128 | 1.0972751  |
| H  | -0.7479402 | -5.7014673 | 1.6666520  |
| C  | -0.7869237 | -3.5682305 | 1.3583599  |
| C  | -2.5670973 | 0.5103151  | -2.4377732 |
| C  | -3.9334477 | 0.5816595  | -2.6844471 |
| H  | -4.3221421 | 1.3910624  | -3.3201056 |
| C  | -4.8559707 | -0.3268018 | -2.0928841 |
| C  | -6.2634721 | -0.1717454 | -2.2744450 |
| C  | -4.3658594 | -1.3954120 | -1.2567897 |
| C  | -5.3187752 | -2.2157659 | -0.5813430 |
| C  | -2.9412601 | -1.5702323 | -1.1120440 |
| C  | -2.1009164 | -0.5938914 | -1.6611258 |
| O  | -1.0877586 | -1.2168574 | 0.9764442  |
| O  | -0.7197346 | -0.7117410 | -1.4937147 |
| P  | -0.1052911 | -0.3428959 | -0.0183683 |
| O  | 1.3017427  | -0.9976764 | -0.0495726 |
| O  | -0.2665898 | 1.1138004  | 0.3787304  |
| C  | -3.2837670 | -6.8200857 | -1.3288459 |
| C  | -3.7827680 | -5.7718107 | -2.1473907 |
| H  | -2.0419186 | -7.3256974 | 0.3716552  |
| H  | -3.5354999 | -7.8661868 | -1.5607844 |
| H  | -3.8710914 | -3.6489417 | -2.5083514 |
| H  | -4.4080029 | -6.0109247 | -3.0212305 |
| C  | -6.6819769 | -2.0257996 | -0.7614671 |
| C  | -7.1618652 | -1.0072558 | -1.6280787 |
| H  | -4.9622668 | -2.9991872 | 0.1016145  |
| H  | -7.3967123 | -2.6652053 | -0.2211350 |
| H  | -8.2450483 | -0.8710358 | -1.7683998 |
| H  | -6.6224845 | 0.6418497  | -2.9242765 |
| C  | 1.6771635  | -3.4534233 | 1.8396246  |
| C  | 0.3426700  | -3.2167943 | 2.2731039  |
| C  | 2.7377385  | -2.9996849 | 2.6555268  |
| C  | 0.0938165  | -2.5676604 | 3.5152420  |
| C  | 1.1867199  | -2.1651040 | 4.3044755  |
| C  | 2.5170524  | -2.3644116 | 3.8965497  |
| H  | 3.7754863  | -3.2109748 | 2.3551981  |
| C  | -1.3374783 | -2.3835003 | 4.0160960  |
| H  | 0.9920654  | -1.6790572 | 5.2706841  |
| C  | -1.5185626 | -1.2174425 | 4.9951823  |
| H  | -1.0087656 | -1.3984960 | 5.9646871  |
| H  | -2.5951758 | -1.0681773 | 5.2090813  |
| H  | -1.1423397 | -0.2689287 | 4.5652777  |
| C  | -1.8510413 | -3.7022893 | 4.6296503  |
| H  | -1.9677866 | -2.1543603 | 3.1319480  |
| H  | -1.2458611 | -3.9823074 | 5.5174233  |
| H  | -1.7985415 | -4.5388939 | 3.9046602  |
| H  | -2.9068304 | -3.5964204 | 4.9535433  |
| C  | 3.7009807  | -2.0193540 | 4.7904236  |
| C  | 3.5854225  | -0.6467026 | 5.4674620  |
| H  | 4.5042639  | -0.4224223 | 6.0463443  |
| H  | 2.7319201  | -0.6024808 | 6.1755860  |
| H  | 3.4417596  | 0.1583945  | 4.7213429  |
| C  | 3.9151904  | -3.1383278 | 5.8292083  |
| H  | 4.5957045  | -1.9914109 | 4.1314068  |
| H  | 4.8155028  | -2.9368666 | 6.4460377  |
| H  | 4.0462162  | -4.1244449 | 5.3395911  |
| H  | 3.0431177  | -3.2147499 | 6.5122359  |
| C  | 2.0002634  | -4.2646015 | 0.5834551  |
| C  | 3.1105591  | -3.6702370 | -0.2981597 |
| H  | 3.3220163  | -4.3484973 | -1.1497624 |
| H  | 4.0659790  | -3.5275510 | 0.2470900  |
| H  | 2.7964561  | -2.7006274 | -0.7340228 |

## TS2; COSMO

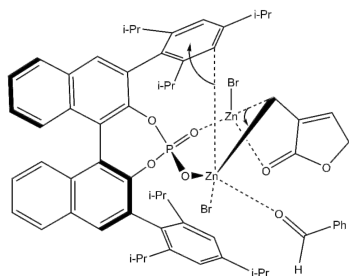

Energy (Hartree) = -11970.02049097

|    |           |            |           |
|----|-----------|------------|-----------|
| Zn | 2.8888126 | -0.6385870 | 0.9585587 |
|----|-----------|------------|-----------|

|   |            |            |            |
|---|------------|------------|------------|
| C | 2.3523936  | -5.7108332 | 0.9906334  |
| H | 1.0830585  | -4.3025153 | -0.0372037 |
| H | 2.5076538  | -6.3446155 | 0.0933460  |
| H | 1.5509615  | -6.1711120 | 1.6021887  |
| H | 3.2851332  | -5.7355594 | 1.5922943  |
| H | 0.9951998  | 5.5263187  | -3.6461722 |
| H | -0.2666812 | 0.5724748  | -6.6382171 |
| H | -4.5895023 | 4.2437513  | -1.0094879 |
| C | 1.1397477  | 4.6487367  | -4.3145385 |
| H | 0.8411111  | -1.7931232 | -4.8061477 |
| H | 3.2857212  | 5.0646417  | -4.4888864 |
| H | -2.7046820 | 4.1353529  | 0.7391581  |
| C | 0.1898646  | 3.5629887  | -3.8237653 |
| C | -0.9646133 | -0.0654023 | -6.0561162 |
| C | 2.6148995  | 4.2267980  | -4.2070287 |
| H | 2.8448622  | 3.3763537  | -4.8823391 |
| C | 0.2323823  | 2.2599520  | -4.3492810 |
| C | -3.8644870 | 4.0100366  | -1.8163881 |
| H | -0.2643876 | 5.4370492  | -5.8137821 |
| C | -0.7707882 | 3.8389890  | -2.8372614 |
| C | 0.7865157  | 5.0901548  | -5.7470963 |
| H | 1.4459538  | 5.9172794  | -6.0838435 |
| H | -0.8120985 | 4.8556399  | -2.4159770 |
| C | 0.8259052  | -0.7665402 | -4.3847318 |
| H | -0.9528889 | -1.0780355 | -6.5103829 |
| H | -1.9837678 | 0.3546113  | -6.1783857 |
| C | -0.6499906 | 1.2522293  | -3.9211347 |
| C | -2.0040083 | 4.0470309  | -0.1143503 |
| C | -1.6678818 | 2.8655853  | -2.3574035 |
| H | -4.3985512 | 3.4345231  | -2.5978362 |
| H | -3.5424901 | 4.9701707  | -2.2728228 |
| C | -0.5622862 | -0.1278202 | -4.5706776 |
| C | -1.6145720 | 1.5585495  | -2.9214252 |
| C | -2.6537825 | 3.2424856  | -1.2506300 |
| H | 1.0887438  | -0.8311296 | -3.3107299 |
| H | -1.0977802 | 3.5442982  | 0.2683402  |
| H | 1.6164629  | -0.1840762 | -4.9029312 |
| H | 2.8690431  | 3.9168757  | -3.1740642 |
| H | -1.7310302 | 5.0764046  | -0.4304559 |
| H | 0.9079489  | 4.2491815  | -6.4619809 |
| H | -1.2971026 | -0.7877551 | -4.0667887 |
| H | -3.0222637 | 2.3009151  | -0.7948083 |
| H | 0.9749060  | 2.0171591  | -5.1264496 |
| C | 1.6705112  | 5.3412974  | -0.5792105 |
| C | 1.9515260  | 3.9986607  | -0.3180573 |
| C | 3.2973525  | 3.5558511  | -0.3261867 |
| C | 4.3478294  | 4.4544948  | -0.6331623 |
| C | 4.0536766  | 5.7941434  | -0.9109935 |
| C | 2.7171430  | 6.2356881  | -0.8747709 |
| H | 0.6305237  | 5.6955164  | -0.5471496 |
| H | 1.1544735  | 3.2719532  | -0.0973734 |
| C | 3.6087794  | 2.1782324  | 0.0307681  |
| H | 5.3885402  | 4.0931053  | -0.6444750 |
| H | 4.8621083  | 6.5005065  | -1.1513477 |
| H | 2.4877517  | 7.2923757  | -1.0817393 |
| O | 2.7317584  | 1.3692788  | 0.3734874  |
| H | 4.6843586  | 1.8628034  | 0.0156064  |
| C | 3.2106989  | 2.8537648  | 3.3516337  |
| C | 1.9023004  | 2.4983125  | 3.2440292  |
| C | 1.1698835  | 3.7455884  | 2.8982994  |
| O | 2.0088813  | 4.8086008  | 2.8936297  |
| C | 3.3439284  | 4.3322349  | 3.1539649  |
| O | -0.0195813 | 3.8386037  | 2.5933416  |
| C | 1.1239228  | 1.2389819  | 3.3351527  |
| H | 3.7454256  | 4.8577153  | 4.0487187  |
| H | 3.9782921  | 4.6142314  | 2.2842114  |
| H | 0.8941325  | 1.0178881  | 4.4008453  |
| H | 1.7080036  | 0.3562407  | 2.9896425  |
| H | 4.0692831  | 2.1955918  | 3.5479216  |

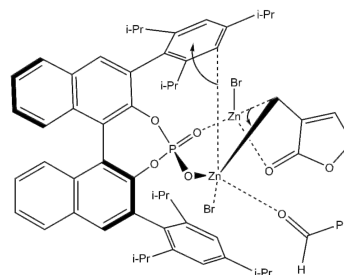

Energy (Hartree) = -11970.00666993  
number of imaginary frequencies: 1

|    |            |            |            |
|----|------------|------------|------------|
| Zn | 2.8833251  | -0.6676534 | 0.9814773  |
| Br | 5.1540056  | -0.6968485 | 1.4643372  |
| Zn | -0.6480236 | 1.5832610  | 2.4054065  |
| Br | -2.9724762 | 1.4354503  | 2.5712516  |
| C  | -1.4200982 | -2.5190119 | 0.6251316  |
| C  | -2.3519868 | -2.7362361 | -0.3941922 |
| C  | -2.6697028 | -4.1020145 | -0.7391694 |
| C  | -3.4799429 | -4.4501268 | -1.8619225 |
| C  | -2.1206333 | -5.1724987 | 0.0597061  |
| C  | -2.4645001 | -6.5225017 | -0.2495690 |
| C  | -1.1963015 | -4.8712609 | 1.1009701  |
| H  | -0.7531258 | -5.7009847 | 1.6727430  |
| C  | -0.7906169 | -3.5689503 | 1.3612265  |
| C  | -2.5560404 | 0.5090586  | -2.4381592 |
| C  | -3.9213836 | 0.5801982  | -2.6892772 |
| H  | -4.3062021 | 1.3918104  | -3.3243531 |
| C  | -4.8463575 | -0.3284391 | -2.1031245 |
| C  | -6.2527219 | -0.1734743 | -2.2892548 |
| C  | -4.3593392 | -1.3974419 | -1.2662696 |
| C  | -5.3146024 | -2.2176534 | -0.5945362 |
| C  | -2.9353116 | -1.5727932 | -1.1173538 |
| C  | -2.0921657 | -0.5968236 | -1.6629805 |
| O  | -1.0889265 | -1.2184163 | 0.9759117  |
| O  | -0.7110234 | -0.7165810 | -1.4930086 |
| P  | -0.0999184 | -0.3488885 | -0.0157357 |
| O  | 1.3026966  | -1.0164305 | -0.0385759 |
| O  | -0.2494505 | 1.1093462  | 0.3772096  |
| C  | -3.2849427 | -6.8219905 | -1.3259956 |
| C  | -3.7801530 | -5.7747501 | -2.1471428 |
| H  | -2.0480189 | -7.3264094 | 0.3777394  |
| H  | -3.5379178 | -7.8680990 | -1.5562802 |
| H  | -3.8640790 | -3.6519711 | -2.5113580 |
| H  | -4.4042317 | -6.0142203 | -3.0216321 |
| C  | -6.6766000 | -2.0275502 | -0.7797846 |
| C  | -7.1532086 | -1.0090168 | -1.6471897 |
| H  | -4.9599409 | -3.0002865 | 0.0900317  |
| H  | -7.3931093 | -2.6666531 | -0.2416242 |
| H  | -8.2357909 | -0.8720619 | -1.7908214 |
| H  | -6.6090580 | 0.6414430  | -2.9388175 |
| C  | 1.6728084  | -3.4549647 | 1.8439205  |
| C  | 0.3383248  | -3.2169049 | 2.2763446  |
| C  | 2.7336124  | -2.9980016 | 2.6580358  |
| C  | 0.0890749  | -2.5635673 | 3.5161774  |
| C  | 1.1821859  | -2.1600248 | 4.3045089  |
| C  | 2.5124384  | -2.3603811 | 3.8980923  |
| H  | 3.7716752  | -3.2097532 | 2.3587563  |
| C  | -1.3420938 | -2.3737662 | 4.0149607  |
| H  | 0.9864843  | -1.6707906 | 5.2688295  |
| C  | -1.5215988 | -1.2054626 | 4.9913644  |
| H  | -1.0153724 | -1.3860253 | 5.9630478  |
| H  | -2.5979491 | -1.0510650 | 5.2012805  |
| H  | -1.1448541 | -0.2580106 | 4.5601301  |
| H  | -1.8602860 | -3.6901828 | 4.6294786  |
| H  | -1.9706235 | -2.1428224 | 3.1301080  |
| H  | -1.2576763 | -3.9713954 | 5.5185317  |

TS2

|   |            |            |            |   |           |           |            |
|---|------------|------------|------------|---|-----------|-----------|------------|
| H | -1.8100762 | -4.5280657 | 3.9059592  | H | 2.4631245 | 7.2677883 | -1.0668052 |
| H | -2.9160258 | -3.5804020 | 4.9516702  | O | 2.7295382 | 1.3441814 | 0.3701689  |
| C | 3.6961424  | -2.0166435 | 4.7927623  | H | 4.6795573 | 1.8372162 | 0.0100852  |
| C | 3.5852356  | -0.6410210 | 5.4642996  | C | 3.2339413 | 2.8394116 | 3.3370277  |
| H | 4.5030771  | -0.4188295 | 6.0455320  | C | 1.9212434 | 2.4981473 | 3.2388214  |
| H | 2.7300415  | -0.5892571 | 6.1698495  | C | 1.1993136 | 3.7519837 | 2.8849888  |
| H | 3.4475675  | 0.1619159  | 4.7150882  | O | 2.0529203 | 4.8069259 | 2.8723551  |
| C | 3.9032912  | -3.1325076 | 5.8360749  | C | 3.3803651 | 4.3170978 | 3.1301815  |
| H | 4.5921248  | -1.9935584 | 4.1351936  | O | 0.0141998 | 3.8526967 | 2.5775122  |
| H | 4.8030840  | -2.9336633 | 6.4544342  | C | 1.1291942 | 1.2498819 | 3.3371774  |
| H | 4.0301866  | -4.1211395 | 5.3507932  | H | 3.7918441 | 4.8430682 | 4.0210664  |
| H | 3.0296364  | -3.2033776 | 6.5174497  | H | 4.0148916 | 4.5889043 | 2.2566246  |
| C | 1.9966243  | -4.2720044 | 0.5915793  | H | 0.8856736 | 1.0468059 | 4.4037288  |
| C | 3.1042354  | -3.6801835 | -0.2952557 | H | 1.7085699 | 0.3565676 | 3.0118455  |
| H | 3.3166460  | -4.3631303 | -1.1428428 | H | 4.0843674 | 2.1698762 | 3.5310410  |
| H | 4.0606489  | -3.5302597 | 0.2464790  |   |           |           |            |
| H | 2.7854374  | -2.7152654 | -0.7376098 |   |           |           |            |
| C | 2.3521029  | -5.7148335 | 1.0072475  |   |           |           |            |
| H | 1.0786076  | -4.3154936 | -0.0274144 |   |           |           |            |
| H | 2.5078042  | -6.3546838 | 0.1143776  |   |           |           |            |
| H | 1.5524405  | -6.1727492 | 1.6226904  |   |           |           |            |
| H | 3.2850463  | -5.7348860 | 1.6085979  |   |           |           |            |
| H | 0.9728480  | 5.5476424  | -3.6479489 |   |           |           |            |
| H | -0.2583118 | 0.5870281  | -6.6356719 |   |           |           |            |
| H | -4.5913926 | 4.2213317  | -0.9861648 |   |           |           |            |
| C | 1.1218094  | 4.6706314  | -4.3165335 |   |           |           |            |
| H | 0.8661309  | -1.7755883 | -4.8063888 |   |           |           |            |
| H | 3.2641932  | 5.1050317  | -4.5019413 |   |           |           |            |
| H | -2.6992431 | 4.1235427  | 0.7535712  |   |           |           |            |
| C | 0.1834748  | 3.5771974  | -3.8205555 |   |           |           |            |
| C | -0.9510149 | -0.0554084 | -6.0525040 |   |           |           |            |
| C | 2.6012238  | 4.2623420  | -4.2158359 |   |           |           |            |
| H | 2.8356291  | 3.4135113  | -4.8914647 |   |           |           |            |
| C | 0.2349764  | 2.2746862  | -4.3456392 |   |           |           |            |
| C | -3.8692841 | 3.9955520  | -1.7975315 |   |           |           |            |
| H | -0.2965241 | 5.4442761  | -5.8090870 |   |           |           |            |
| C | -0.7769672 | 3.8459988  | -2.8322420 |   |           |           |            |
| C | 0.7578917  | 5.1081395  | -5.7474161 |   |           |           |            |
| H | 1.4077852  | 5.9407180  | -6.0892392 |   |           |           |            |
| H | -0.8266699 | 4.8627296  | -2.4119323 |   |           |           |            |
| C | 0.8457520  | -0.7495055 | -4.3842675 |   |           |           |            |
| H | -0.9349254 | -1.0670506 | -6.5086983 |   |           |           |            |
| H | -1.9721705 | 0.3598551  | -6.1722026 |   |           |           |            |
| C | -0.6401218 | 1.2612482  | -3.9169956 |   |           |           |            |
| C | -2.0033009 | 4.0433958  | -0.1042468 |   |           |           |            |
| C | -1.6664264 | 2.8668261  | -2.3503454 |   |           |           |            |
| H | -4.4035570 | 3.4187409  | -2.5776584 |   |           |           |            |
| H | -3.5571636 | 4.9589612  | -2.2538269 |   |           |           |            |
| C | -0.5456343 | -0.1175528 | -4.5680639 |   |           |           |            |
| C | -1.6054663 | 1.5611629  | -2.9165427 |   |           |           |            |
| C | -2.6507251 | 3.2353168  | -1.2391899 |   |           |           |            |
| H | 1.1104100  | -0.8146785 | -3.3108525 |   |           |           |            |
| H | -1.0913763 | 3.5483381  | 0.2747231  |   |           |           |            |
| H | 1.6334966  | -0.1632053 | -4.9024122 |   |           |           |            |
| H | 2.8637001  | 3.9540590  | -3.1845809 |   |           |           |            |
| H | -1.7409590 | 5.0762593  | -0.4189037 |   |           |           |            |
| H | 0.8823174  | 4.2676564  | -6.4620587 |   |           |           |            |
| H | -1.2762498 | -0.7816661 | -4.0637189 |   |           |           |            |
| H | -3.0114379 | 2.2915669  | -0.7815685 |   |           |           |            |
| H | 0.9777332  | 2.0369162  | -5.1241405 |   |           |           |            |
| C | 1.6544911  | 5.3119945  | -0.5710757 |   |           |           |            |
| C | 1.9408707  | 3.9684266  | -0.3195763 |   |           |           |            |
| C | 3.2874287  | 3.5299963  | -0.3364306 |   |           |           |            |
| C | 4.3329707  | 4.4329115  | -0.6462269 |   |           |           |            |
| C | 4.0336661  | 5.7727045  | -0.9161257 |   |           |           |            |
| C | 2.6962274  | 6.2102853  | -0.8681841 |   |           |           |            |
| H | 0.6130291  | 5.6597717  | -0.5262113 |   |           |           |            |
| H | 1.1467302  | 3.2387790  | -0.0973924 |   |           |           |            |
| C | 3.6026090  | 2.1525702  | 0.0236860  |   |           |           |            |
| H | 5.3747284  | 4.0742357  | -0.6662005 |   |           |           |            |
| H | 4.8383980  | 6.4823338  | -1.1594157 |   |           |           |            |

### TS3; COSMO

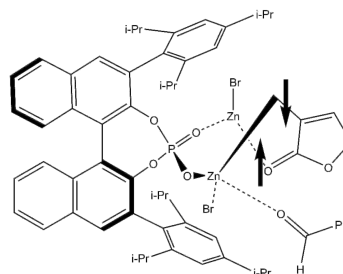

Energy (Hartree) = -11970.03825082

|    |            |            |            |
|----|------------|------------|------------|
| Zn | 2.7909245  | 0.0340330  | -0.8955508 |
| Br | 4.5606542  | -0.3406560 | -2.4216063 |
| Zn | 0.0441364  | 1.4766318  | 2.2129623  |
| Br | -1.3547046 | 0.9840136  | 3.9518261  |
| C  | -0.6436429 | -2.6140386 | 1.0090559  |
| C  | -2.0371354 | -2.7400917 | 0.9741008  |
| C  | -2.5959191 | -4.0709011 | 0.9339102  |
| C  | -3.9855084 | -4.3222388 | 0.7213402  |
| C  | -1.7159984 | -5.2039698 | 1.0894084  |
| C  | -2.2657458 | -6.5214143 | 1.0981040  |
| C  | -0.3113145 | -4.9928385 | 1.1827316  |
| H  | 0.3506813  | -5.8644698 | 1.2983698  |
| C  | 0.2493713  | -3.7252355 | 1.0843950  |
| C  | -3.5147716 | 0.6289246  | -0.1371269 |
| C  | -4.6199608 | 0.7195445  | 0.7031084  |
| H  | -5.3056760 | 1.5729075  | 0.5948874  |
| C  | -4.8569896 | -0.2171489 | 1.7474554  |
| C  | -5.9314747 | -0.0359859 | 2.6694744  |
| C  | -3.9642490 | -1.3367943 | 1.9149278  |
| C  | -4.1471019 | -2.1839155 | 3.0482378  |
| C  | -2.9049201 | -1.5305762 | 0.9551798  |
| C  | -2.6923718 | -0.5317766 | 0.0002500  |
| O  | -0.0718702 | -1.3425218 | 1.0329466  |
| O  | -1.6245319 | -0.6754393 | -0.8937768 |
| P  | -0.1423961 | -0.3471653 | -0.2859653 |
| O  | 0.8851354  | -0.6624928 | -1.3645795 |
| O  | -0.1023135 | 1.0720542  | 0.3337053  |
| C  | -3.6254611 | -6.7274999 | 0.9210939  |
| C  | -4.4867510 | -5.6166768 | 0.7143223  |
| H  | -1.5816799 | -7.3744549 | 1.2298390  |
| H  | -4.0364000 | -7.7485908 | 0.9220729  |
| H  | -4.6642979 | -3.4752444 | 0.5514771  |
| H  | -5.5610202 | -5.7828901 | 0.5411988  |
| C  | -5.1874378 | -1.9676031 | 3.9410842  |
| C  | -6.0997142 | -0.8964813 | 3.7434966  |
| H  | -3.4422750 | -3.0090345 | 3.2200294  |
| H  | -5.3015589 | -2.6282399 | 4.8140694  |

|   |            |            |            |   |            |            |            |
|---|------------|------------|------------|---|------------|------------|------------|
| H | -6.9256685 | -0.7408462 | 4.4542190  | H | -2.2624747 | 0.2297670  | -4.9066366 |
| H | -6.6123580 | 0.8171737  | 2.5224501  | H | 0.0748491  | 4.3714434  | -3.9626872 |
| C | 2.3958534  | -3.6165264 | -0.2299051 | H | -1.4248126 | 5.0766598  | 1.0638870  |
| C | 1.7312967  | -3.5155092 | 1.0258071  | H | -3.5037749 | 4.5595635  | -5.3684597 |
| C | 3.7883981  | -3.4148119 | -0.2674558 | H | -3.7289590 | -0.5376085 | -2.2960193 |
| C | 2.4614153  | -3.2252101 | 2.2069242  | H | -2.7766349 | 2.3323792  | 1.4741596  |
| C | 3.8559424  | -3.0520919 | 2.1156215  | H | -2.7382385 | 2.3930454  | -4.4250784 |
| C | 4.5403843  | -3.1444720 | 0.8904355  | C | 3.7741601  | 6.0253903  | -1.8774756 |
| H | 4.3142341  | -3.4696453 | -1.2321053 | C | 3.3493013  | 4.6948002  | -1.8196600 |
| C | 1.7664050  | -3.0982003 | 3.5620259  | C | 1.9924956  | 4.4027681  | -1.5417811 |
| H | 4.4232526  | -2.8326557 | 3.0343265  | C | 1.0717106  | 5.4516652  | -1.3276948 |
| C | 1.7206918  | -1.6366553 | 4.0429271  | C | 1.5029132  | 6.7835566  | -1.3813017 |
| H | 2.7413110  | -1.2155228 | 4.1583209  | C | 2.8519481  | 7.0687169  | -1.6556712 |
| H | 1.2002455  | -1.5548141 | 5.0189436  | H | 4.8259680  | 6.2606210  | -2.1008226 |
| H | 1.1675225  | -1.0012320 | 3.3243904  | H | 4.0402118  | 3.8548464  | -1.9935378 |
| C | 2.3942856  | -4.0174579 | 4.6242263  | C | 1.5438723  | 3.0052978  | -1.4574453 |
| H | 0.7154953  | -3.4287017 | 3.4263432  | H | 0.0200562  | 5.2068819  | -1.1171093 |
| H | 3.4360665  | -3.7187004 | 4.8641821  | H | 0.7888588  | 7.6031849  | -1.2107402 |
| H | 2.4175892  | -5.0719164 | 4.2814830  | H | 3.1907385  | 8.1152971  | -1.7012532 |
| H | 1.8134140  | -3.9743488 | 5.5685202  | O | 2.3306362  | 2.0580170  | -1.5414265 |
| C | 6.0494934  | -2.9412868 | 0.8015034  | H | 0.4499596  | 2.8261338  | -1.2904268 |
| C | 6.4310870  | -1.4581260 | 0.9673200  | C | 4.8113330  | 2.2214356  | 1.1064115  |
| H | 7.5299069  | -1.3233707 | 0.8850160  | C | 3.5856286  | 1.6497377  | 1.3426042  |
| H | 6.1184295  | -1.0723434 | 1.9612327  | C | 2.7483702  | 2.7541344  | 1.8531649  |
| H | 5.9486435  | -0.8430624 | 0.1808044  | O | 3.4211040  | 3.9103844  | 1.8948834  |
| C | 6.8178370  | -3.8345282 | 1.7900335  | C | 4.7669888  | 3.6719144  | 1.4304612  |
| H | 6.3484372  | -3.2399991 | -0.2267433 | O | 1.5623872  | 2.7465184  | 2.2531957  |
| H | 7.9125365  | -3.7344253 | 1.6388227  | C | 3.0711291  | 0.3019004  | 1.1114852  |
| H | 6.5488876  | -4.9029983 | 1.6644229  | H | 5.4624763  | 3.9894214  | 2.2385496  |
| H | 6.6046472  | -3.5555141 | 2.8433539  | H | 4.9405246  | 4.3364327  | 0.5540386  |
| C | 1.6391886  | -4.0164037 | -1.4984481 | H | 2.1498759  | 0.1001945  | 1.6912154  |
| C | 2.1680399  | -3.3651257 | -2.7841874 | H | 3.8025355  | -0.4845720 | 1.3723376  |
| H | 1.4846411  | -3.5928183 | -3.6275889 | H | 5.6969236  | 1.7160389  | 0.6991279  |
| H | 3.1707045  | -3.7496795 | -3.0632831 |   |            |            |            |
| H | 2.2447637  | -2.2671415 | -2.6896213 |   |            |            |            |
| C | 1.6330787  | -5.5514097 | -1.6548095 |   |            |            |            |
| H | 0.5867290  | -3.6844517 | -1.3711794 |   |            |            |            |
| H | 1.0587715  | -5.8499942 | -2.5563915 |   |            |            |            |
| H | 1.1829086  | -6.0608088 | -0.7813196 |   |            |            |            |
| H | 2.6699545  | -5.9316425 | -1.7687658 |   |            |            |            |
| H | -1.7807085 | 5.8560196  | -3.1505591 |   |            |            |            |
| H | -4.7864644 | 1.0479459  | -4.7216636 |   |            |            |            |
| H | -3.9238894 | 4.2846259  | 2.5119615  |   |            |            |            |
| C | -2.0340051 | 4.9801125  | -3.7888439 |   |            |            |            |
| H | -2.7567313 | -1.4078859 | -4.3893396 |   |            |            |            |
| H | -0.4801953 | 5.4862474  | -5.2526078 |   |            |            |            |
| H | -1.3292874 | 3.9820942  | 2.4642115  |   |            |            |            |
| C | -2.4262922 | 3.8470536  | -2.8487322 |   |            |            |            |
| C | -4.8834217 | 0.3407007  | -3.8713579 |   |            |            |            |
| C | -0.7832288 | 4.6303562  | -4.6149507 |   |            |            |            |
| H | -0.9701227 | 3.7646283  | -5.2836849 |   |            |            |            |
| C | -2.7576055 | 2.5713969  | -3.3380990 |   |            |            |            |
| C | -3.9641207 | 4.1261169  | 1.4145324  |   |            |            |            |
| H | -4.0982756 | 5.6756125  | -4.1000662 |   |            |            |            |
| C | -2.4716254 | 4.0417464  | -1.4585449 |   |            |            |            |
| C | -3.2076382 | 5.3919830  | -4.6963286 |   |            |            |            |
| H | -2.9293702 | 6.2556882  | -5.3350196 |   |            |            |            |
| H | -2.2369014 | 5.0425607  | -1.0596867 |   |            |            |            |
| C | -2.4522587 | -0.4077370 | -4.0178976 |   |            |            |            |
| H | -5.2176683 | -0.6350031 | -4.2810270 |   |            |            |            |
| H | -5.6813135 | 0.7249512  | -3.2037339 |   |            |            |            |
| C | -3.1295708 | 1.5134719  | -2.4894299 |   |            |            |            |
| C | -1.4472649 | 4.0072308  | 1.3608312  |   |            |            |            |
| C | -2.8049055 | 3.0109782  | -0.5587332 |   |            |            |            |
| H | -4.9224042 | 3.6238704  | 1.1778732  |   |            |            |            |
| H | -3.9811146 | 5.1228808  | 0.9254101  |   |            |            |            |
| C | -3.5492048 | 0.1853846  | -3.1164148 |   |            |            |            |
| C | -3.1518083 | 1.7305545  | -1.0823295 |   |            |            |            |
| C | -2.7512036 | 3.3045634  | 0.9408274  |   |            |            |            |
| H | -1.5002224 | -0.5230430 | -3.4641681 |   |            |            |            |
| H | -0.5578408 | 3.5386742  | 0.8926446  |   |            |            |            |

### TS3

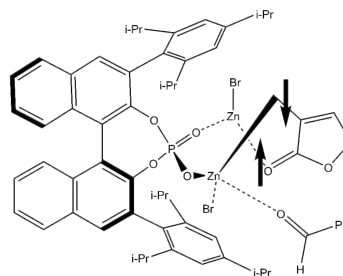

Energy (Hartree) = -11970.02514042  
number of imaginary frequencies: 1

|    |            |            |            |
|----|------------|------------|------------|
| Zn | 2.8054421  | 0.0177796  | -0.8903764 |
| Br | 4.6086430  | -0.3259236 | -2.3668227 |
| Zn | 0.0361982  | 1.4554275  | 2.2282258  |
| Br | -1.3675214 | 0.9767959  | 3.9602857  |
| C  | -0.6402291 | -2.6131212 | 1.0068231  |
| C  | -2.0336201 | -2.7393363 | 0.9688921  |
| C  | -2.5924859 | -4.0695541 | 0.9209104  |
| C  | -3.9821618 | -4.3194942 | 0.7091767  |
| C  | -1.7124010 | -5.2033771 | 1.0683306  |
| C  | -2.2625662 | -6.5201325 | 1.0682686  |
| C  | -0.3081712 | -4.9921442 | 1.1643389  |
| H  | 0.3551006  | -5.8635186 | 1.2744870  |
| C  | 0.2533041  | -3.7242654 | 1.0766047  |
| C  | -3.5068516 | 0.6352607  | -0.1292028 |
| C  | -4.6115071 | 0.7239652  | 0.7116692  |
| H  | -5.2954068 | 1.5790636  | 0.6056671  |
| C  | -4.8500602 | -0.2155936 | 1.7526932  |
| C  | -5.9230868 | -0.0367015 | 2.6761464  |
| C  | -3.9592920 | -1.3373801 | 1.9151255  |
| C  | -4.1435697 | -2.1891802 | 3.0444158  |

|   |            |            |            |   |            |            |            |
|---|------------|------------|------------|---|------------|------------|------------|
| C | -2.9002832 | -1.5288988 | 0.9548776  | C | -2.4782637 | 4.0537265  | -1.4475257 |
| C | -2.6855579 | -0.5268299 | 0.0036825  | C | -3.2471354 | 5.4099568  | -4.6718617 |
| O | -0.0699155 | -1.3417554 | 1.0376838  | H | -2.9811903 | 6.2766727  | -5.3117141 |
| O | -1.6187461 | -0.6684185 | -0.8903678 | H | -2.2463428 | 5.0548181  | -1.0473398 |
| P | -0.1348291 | -0.3447604 | -0.2812836 | C | -2.4452135 | -0.3917102 | -4.0111453 |
| O | 0.8922090  | -0.6636493 | -1.3573779 | H | -5.2108587 | -0.6283790 | -4.2729221 |
| O | -0.0975597 | 1.0734283  | 0.3422649  | H | -5.6782052 | 0.7285000  | -3.1936279 |
| C | -3.6219546 | -6.7252268 | 0.8918491  | C | -3.1289926 | 1.5250608  | -2.4802239 |
| C | -4.4832350 | -5.6134510 | 0.6945103  | C | -1.4394984 | 4.0150151  | 1.3683763  |
| H | -1.5782579 | -7.3740220 | 1.1929583  | C | -2.8027096 | 3.0199760  | -0.5481810 |
| H | -4.0325769 | -7.7463689 | 0.8862610  | H | -4.9145199 | 3.6274896  | 1.1977117  |
| H | -4.6603942 | -3.4706785 | 0.5469340  | H | -3.9777078 | 5.1279392  | 0.9450456  |
| H | -5.5578639 | -5.7782953 | 0.5226507  | C | -3.5440709 | 0.1963609  | -3.1087966 |
| C | -5.1827817 | -1.9745848 | 3.9382913  | C | -3.1466131 | 1.7392656  | -1.0727449 |
| C | -6.0924177 | -0.9009985 | 3.7462157  | C | -2.7438906 | 3.3113286  | 0.9516020  |
| H | -3.4397303 | -3.0159845 | 3.2112847  | H | -1.4924245 | -0.5057809 | -3.4588658 |
| H | -5.2974237 | -2.6385680 | 4.8085398  | H | -0.5507331 | 3.5470595  | 0.8991129  |
| H | -6.9171064 | -0.7460744 | 4.4584323  | H | -2.2569628 | 0.2474189  | -4.8990296 |
| H | -6.6017762 | 0.8189358  | 2.5336207  | H | 0.0481804  | 4.4034268  | -3.9766805 |
| C | 2.4086926  | -3.6085894 | -0.2245639 | H | -1.4193837 | 5.0850386  | 1.0726622  |
| C | 1.7355249  | -3.5142059 | 1.0270902  | H | -3.5471802 | 4.5781076  | -5.3427087 |
| C | 3.8014600  | -3.4076513 | -0.2510249 | H | -3.7204792 | -0.5280746 | -2.2890485 |
| C | 2.4573767  | -3.2313633 | 2.2148926  | H | -2.7657143 | 2.3387102  | 1.4843024  |
| C | 3.8524547  | -3.0598642 | 2.1341606  | H | -2.7505646 | 2.4098051  | -4.4152193 |
| C | 4.5454130  | -3.1457449 | 0.9136251  | C | 3.7736116  | 5.9942155  | -1.9612029 |
| H | 4.3335152  | -3.4538060 | -1.2126069 | C | 3.3433829  | 4.6671436  | -1.8706068 |
| C | 1.7531482  | -3.1108629 | 3.5659502  | C | 1.9890181  | 4.3881548  | -1.5708201 |
| H | 4.4137304  | -2.8476525 | 3.0582400  | C | 1.0758411  | 5.4447567  | -1.3680932 |
| C | 1.7070241  | -1.6525757 | 4.0562547  | C | 1.5131786  | 6.7730652  | -1.4543557 |
| H | 2.7276636  | -1.2343948 | 4.1819049  | C | 2.8595578  | 7.0463291  | -1.7501866 |
| H | 1.1789261  | -1.5740636 | 5.0282831  | H | 4.8233971  | 6.2198033  | -2.2038713 |
| H | 1.1607255  | -1.0112625 | 3.3378023  | H | 4.0246199  | 3.8173339  | -2.0366821 |
| C | 2.3707721  | -4.0389332 | 4.6263235  | C | 1.5375375  | 2.9911419  | -1.4568165 |
| H | 0.7023694  | -3.4378490 | 3.4209225  | H | 0.0255994  | 5.2086377  | -1.1406459 |
| H | 3.4117895  | -3.7455265 | 4.8756542  | H | 0.8046617  | 7.5993462  | -1.2925309 |
| H | 2.3944426  | -5.0908634 | 4.2765121  | H | 3.2024874  | 8.0901424  | -1.8219449 |
| H | 1.7842022  | -4.0009520 | 5.5672763  | O | 2.3248718  | 2.0458220  | -1.5294903 |
| C | 6.0552895  | -2.9436279 | 0.8366625  | H | 0.4444258  | 2.8156210  | -1.2803853 |
| C | 6.4366719  | -1.4612761 | 1.0088104  | C | 4.8009676  | 2.2030748  | 1.0953803  |
| H | 7.5361671  | -1.3271036 | 0.9348716  | C | 3.5787517  | 1.6292486  | 1.3479061  |
| H | 6.1169761  | -1.0773623 | 2.0013102  | C | 2.7415419  | 2.7351116  | 1.8587622  |
| H | 5.9616726  | -0.8460626 | 0.2177817  | O | 3.4124976  | 3.8948162  | 1.8866350  |
| C | 6.8151975  | -3.8414796 | 1.8272142  | C | 4.7520018  | 3.6567841  | 1.4087000  |
| H | 6.3611196  | -3.2382652 | -0.1906233 | O | 1.5600498  | 2.7260735  | 2.2659403  |
| H | 7.9111953  | -3.7425748 | 1.6851296  | C | 3.0635856  | 0.2834030  | 1.1253026  |
| H | 6.5454791  | -4.9089257 | 1.6963307  | H | 5.4556268  | 3.9869497  | 2.2055997  |
| H | 6.5951591  | -3.5668609 | 2.8802385  | H | 4.9099493  | 4.3153284  | 0.5240191  |
| C | 1.6618844  | -4.0013141 | -1.5011623 | H | 2.1402657  | 0.0837204  | 1.7016708  |
| C | 2.1995513  | -3.3427440 | -2.7796496 | H | 3.7939905  | -0.5055273 | 1.3808930  |
| H | 1.5230465  | -3.5671110 | -3.6292984 | H | 5.6794021  | 1.6951237  | 0.6761558  |
| H | 3.2046140  | -3.7239013 | -3.0540357 |   |            |            |            |
| H | 2.2749703  | -2.2450195 | -2.6826816 |   |            |            |            |
| C | 1.6597623  | -5.5353926 | -1.6658239 |   |            |            |            |
| H | 0.6078962  | -3.6718965 | -1.3798340 |   |            |            |            |
| H | 1.0928320  | -5.8303905 | -2.5731046 |   |            |            |            |
| H | 1.2041136  | -6.0508836 | -0.7988385 |   |            |            |            |
| H | 2.6979621  | -5.9132474 | -1.7738636 |   |            |            |            |
| H | -1.8063126 | 5.8757306  | -3.1396492 |   |            |            |            |
| H | -4.7871644 | 1.0562341  | -4.7116999 |   |            |            |            |
| H | -3.9121426 | 4.2854447  | 2.5294420  |   |            |            |            |
| C | -2.0619215 | 5.0005765  | -3.7785845 |   |            |            |            |
| H | -2.7463136 | -1.3919390 | -4.3847448 |   |            |            |            |
| H | -0.5250231 | 5.5205525  | -5.2563558 |   |            |            |            |
| H | -1.3180712 | 3.9876367  | 2.4712379  |   |            |            |            |
| C | -2.4396190 | 3.8627719  | -2.8381166 |   |            |            |            |
| C | -4.8795476 | 0.3477210  | -3.8620378 |   |            |            |            |
| C | -0.8177495 | 4.6611632  | -4.6186154 |   |            |            |            |
| H | -1.0063519 | 3.7972637  | -5.2890190 |   |            |            |            |
| C | -2.7661107 | 2.5865408  | -3.3279669 |   |            |            |            |
| C | -3.9559169 | 4.1301034  | 1.4318064  |   |            |            |            |
| H | -4.1328788 | 5.6862755  | -4.0653481 |   |            |            |            |

### TS4; COSMO

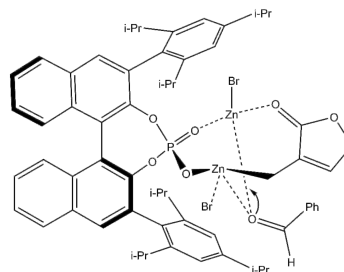

Energy (Hartree) = -11970.02991345

|    |            |            |            |
|----|------------|------------|------------|
| Zn | 2.3545085  | -0.5841435 | -1.9685920 |
| Br | 2.1739532  | -2.0812967 | -3.7899312 |
| Zn | 0.7046674  | 2.4821502  | 1.5636051  |
| Br | -0.0734026 | 3.9156418  | 3.1493555  |
| C  | -0.2288600 | -1.6631968 | 2.5577394  |
| C  | -1.5967013 | -1.9436661 | 2.6466528  |

|   |            |            |            |   |            |            |            |
|---|------------|------------|------------|---|------------|------------|------------|
| C | -1.9880869 | -3.2118589 | 3.2144075  | H | -2.5984277 | 3.5697900  | -5.1785993 |
| C | -3.3378401 | -3.6771828 | 3.2152274  | H | -4.8377759 | -1.7303403 | -3.8637526 |
| C | -0.9710374 | -4.0677640 | 3.7795291  | H | -3.8300884 | 4.8948579  | 0.8604264  |
| C | -1.3550130 | -5.3065463 | 4.3760872  | C | -3.1067349 | 2.5812100  | -5.2428872 |
| C | 0.4005795  | -3.6922644 | 3.6876364  | H | -2.3304403 | -3.2905872 | -2.6195321 |
| H | 1.1643258  | -4.3682639 | 4.1012072  | H | -2.2981421 | 2.2742711  | -7.2509534 |
| C | 0.8006561  | -2.5315669 | 3.0369122  | H | -1.3101634 | 4.7679337  | 0.4523333  |
| C | -3.4088464 | 0.4087689  | 0.2008128  | C | -3.0871800 | 1.9874037  | -3.8390093 |
| C | -4.5068498 | 0.7934996  | 0.9644010  | C | -4.7801218 | -1.9253794 | -2.7723417 |
| H | -5.2707910 | 1.4446222  | 0.5135007  | C | -2.3529538 | 1.7374600  | -6.2820411 |
| C | -4.6555467 | 0.4075665  | 2.3265731  | H | -2.8639407 | 0.7713027  | -6.4737871 |
| C | -5.7441820 | 0.8907371  | 3.1139511  | C | -3.2038364 | 0.6072379  | -3.6099515 |
| C | -3.6708182 | -0.4534452 | 2.9370690  | C | -4.0114674 | 4.2155053  | 0.0020866  |
| C | -3.7907058 | -0.7346173 | 4.3315731  | H | -5.0924805 | 3.4943700  | -4.9679496 |
| C | -2.5931531 | -0.9626734 | 2.1249327  | C | -2.9859478 | 2.8249340  | -2.7133137 |
| C | -2.4788155 | -0.4860846 | 0.8130576  | C | -4.5596123 | 2.8419564  | -5.6887711 |
| O | 0.1715761  | -0.4530049 | 1.9979593  | H | -4.5896646 | 3.3291054  | -6.6856283 |
| O | -1.4071161 | -0.9196886 | 0.0358216  | H | -2.8608861 | 3.9088779  | -2.8741701 |
| P | 0.0452458  | -0.2326250 | 0.3596710  | C | -2.2452430 | -2.2003292 | -2.8069225 |
| O | 1.0917758  | -1.0089682 | -0.4105224 | H | -4.9086967 | -3.0172127 | -2.6214927 |
| O | -0.0833535 | 1.3079659  | 0.2567782  | H | -5.6363900 | -1.4089279 | -2.2922904 |
| C | -2.6809608 | -5.7128321 | 4.3887569  | C | -3.2760314 | 0.0605600  | -2.3140151 |
| C | -3.6757218 | -4.8959109 | 3.7879368  | C | -1.5294543 | 4.1746257  | -0.4583045 |
| H | -0.5699204 | -5.9439662 | 4.8124124  | C | -3.0170490 | 2.3308566  | -1.3950480 |
| H | -2.9617873 | -6.6736748 | 4.8463732  | H | -4.9229049 | 3.6256411  | 0.2222198  |
| H | -4.1171632 | -3.0609321 | 2.7459905  | H | -4.2274316 | 4.8425674  | -0.8885582 |
| H | -4.7232170 | -5.2336851 | 3.7700809  | C | -3.4383545 | -1.4522222 | -2.1822322 |
| C | -4.8509265 | -0.2329237 | 5.0740591  | C | -3.2161271 | 0.9321672  | -1.1904226 |
| C | -5.8463640 | 0.5739768  | 4.4600718  | C | -2.7887173 | 3.3124199  | -0.2428280 |
| H | -3.0234192 | -1.3500022 | 4.8214339  | H | -1.2807398 | -1.8563159 | -2.3860292 |
| H | -4.9168257 | -0.4580827 | 6.1494898  | H | -0.6441643 | 3.5441842  | -0.6784369 |
| H | -6.6863238 | 0.9594371  | 5.0578558  | H | -2.2027588 | -2.0558343 | -3.9066819 |
| H | -6.4942206 | 1.5375126  | 2.6320441  | H | -1.3174014 | 1.5134309  | -5.9567835 |
| C | 2.9381470  | -2.9074707 | 1.7481808  | H | -1.6501267 | 4.8893314  | -1.2992112 |
| C | 2.2309455  | -2.1913651 | 2.7555326  | H | -5.1226922 | 1.8875494  | -5.7573168 |
| C | 4.2439908  | -2.4942751 | 1.4249874  | H | -3.4597359 | -1.7037738 | -1.1039350 |
| C | 2.8512199  | -1.1030686 | 3.4251740  | H | -2.6149463 | 2.7156534  | 0.6756736  |
| C | 4.1614766  | -0.7378805 | 3.0695886  | H | -3.2572220 | -0.0777562 | -4.4695995 |
| C | 4.8728548  | -1.4094155 | 2.0604291  | C | 2.5310190  | 2.1240496  | -6.2523297 |
| H | 4.7919055  | -3.0290329 | 0.6323281  | C | 1.9915912  | 1.6120465  | -5.0677078 |
| C | 2.1407593  | -0.3645329 | 4.5564105  | C | 0.9995467  | 2.3498755  | -4.3790454 |
| H | 4.6358196  | 0.1062133  | 3.5910572  | C | 0.5550245  | 3.5928032  | -4.8861829 |
| C | 2.3359262  | 1.1556858  | 4.4971699  | C | 1.1128564  | 4.1079407  | -6.0632948 |
| H | 3.3776545  | 1.4593250  | 4.7288794  | C | 2.0985420  | 3.3714675  | -6.7451946 |
| H | 1.6687824  | 1.6737937  | 5.2142178  | H | 3.2907244  | 1.5480439  | -6.8020526 |
| H | 2.1042298  | 1.5470476  | 3.4859061  | H | 2.3017348  | 0.6286942  | -4.6758387 |
| C | 2.5714515  | -0.9326795 | 5.9222585  | C | 0.4171718  | 1.8491717  | -3.1280726 |
| H | 1.0532566  | -0.5558778 | 4.4538054  | H | -0.2295658 | 4.1479858  | -4.3468946 |
| H | 3.6609288  | -0.7913853 | 6.0823830  | H | 0.7749259  | 5.0777330  | -6.4582927 |
| H | 2.3597898  | -2.0193923 | 5.9871269  | H | 2.5291132  | 3.7693500  | -7.6772024 |
| H | 2.0340108  | -0.4265984 | 6.7511016  | O | 0.8430177  | 0.8898578  | -2.4821359 |
| C | 6.2979506  | -1.0227193 | 1.6793693  | H | -0.4747588 | 2.4034944  | -2.7383293 |
| C | 6.5622944  | 0.4893963  | 1.7379236  | C | 3.8619093  | 2.8133426  | -2.3218678 |
| H | 7.5687433  | 0.7232783  | 1.3347636  | C | 3.6772819  | 1.8623067  | -1.3465286 |
| H | 6.5331394  | 0.8718362  | 2.7796111  | C | 2.8913367  | 2.5462004  | -0.3027933 |
| H | 5.8132209  | 1.0551965  | 1.1481632  | O | 2.5575918  | 3.7965722  | -0.6654733 |
| C | 7.3135538  | -1.7969397 | 2.5429522  | C | 3.1634837  | 4.0756912  | -1.9503637 |
| H | 6.4411498  | -1.3474499 | 0.6244034  | O | 2.5330382  | 2.0974079  | 0.8059569  |
| H | 8.3556469  | -1.5701345 | 2.2350110  | C | 3.9812547  | 0.4369719  | -1.2623842 |
| H | 7.1595990  | -2.8918698 | 2.4618303  | H | 3.8276484  | 4.9584293  | -1.8189916 |
| H | 7.2054233  | -1.5214104 | 3.6132881  | H | 2.3528034  | 4.3665626  | -2.6557979 |
| C | 2.3374999  | -4.1197943 | 1.0366720  | H | 4.0881727  | 0.0887860  | -0.2166770 |
| C | 2.5403417  | -4.1068563 | -0.4851098 | H | 4.8537358  | 0.1400483  | -1.8740813 |
| H | 2.0316537  | -4.9770036 | -0.9483160 | H | 4.3894417  | 2.6804937  | -3.2755382 |
| H | 3.6104928  | -4.1681551 | -0.7722202 |   |            |            |            |
| H | 2.1147002  | -3.1950444 | -0.9418196 |   |            |            |            |
| C | 2.8892812  | -5.4218604 | 1.6516399  |   |            |            |            |
| H | 1.2429578  | -4.1025726 | 1.2145119  |   |            |            |            |
| H | 2.4175575  | -6.3102777 | 1.1826717  |   |            |            |            |
| H | 2.7080078  | -5.4731236 | 2.7442348  |   |            |            |            |
| H | 3.9860470  | -5.4962645 | 1.4942246  |   |            |            |            |

TS4



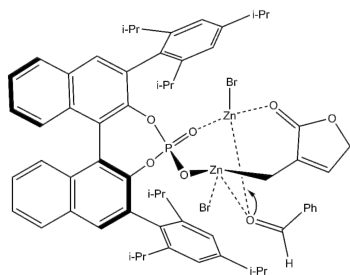

Energy (Hartree) = -11970.01723672  
 number of imaginary frequencies: 2

|    |            |            |            |
|----|------------|------------|------------|
| Zn | 2.3577539  | -0.5874946 | -1.9656331 |
| Br | 2.1815424  | -2.0561270 | -3.7996607 |
| Zn | 0.6962928  | 2.4876592  | 1.5708263  |
| Br | -0.0791378 | 3.9219415  | 3.1508049  |
| C  | -0.2283134 | -1.6591599 | 2.5601826  |
| C  | -1.5959317 | -1.9407808 | 2.6481736  |
| C  | -1.9863943 | -3.2093089 | 3.2154875  |
| C  | -3.3355949 | -3.6751777 | 3.2165849  |
| C  | -0.9690416 | -4.0647747 | 3.7802389  |
| C  | -1.3527718 | -5.3031896 | 4.3762174  |
| C  | 0.4019743  | -3.6884536 | 3.6879290  |
| H  | 1.1669248  | -4.3642622 | 4.0995805  |
| C  | 0.8017028  | -2.5273998 | 3.0381407  |
| C  | -3.4061968 | 0.4094797  | 0.1995883  |
| C  | -4.5066025 | 0.7914300  | 0.9606748  |
| H  | -5.2698384 | 1.4416066  | 0.5072588  |
| C  | -4.6585597 | 0.4047994  | 2.3219738  |
| C  | -5.7498970 | 0.8843805  | 3.1068734  |
| C  | -3.6735513 | -0.4541412 | 2.9345136  |
| C  | -3.7967691 | -0.7364723 | 4.3282271  |
| C  | -2.5928684 | -0.9610460 | 2.1251010  |
| C  | -2.4761624 | -0.4842990 | 0.8134129  |
| O  | 0.1725836  | -0.4487318 | 2.0016332  |
| O  | -1.4035709 | -0.9164045 | 0.0382808  |
| P  | 0.0480668  | -0.2287274 | 0.3633701  |
| O  | 1.0946158  | -1.0050530 | -0.4061163 |
| O  | -0.0834874 | 1.3120091  | 0.2591562  |
| C  | -2.6778832 | -5.7099060 | 4.3892928  |
| C  | -3.6726220 | -4.8935305 | 3.7890928  |
| H  | -0.5671703 | -5.9404532 | 4.8118492  |
| H  | -2.9579370 | -6.6708131 | 4.8467497  |
| H  | -4.1146490 | -3.0586344 | 2.7475589  |
| H  | -4.7199358 | -5.2313903 | 3.7714296  |
| C  | -4.8600278 | -0.2380921 | 5.0677199  |
| C  | -5.8552853 | 0.5665599  | 4.4519172  |
| H  | -3.0290941 | -1.3505875 | 4.8188005  |
| H  | -4.9282960 | -0.4642957 | 6.1427287  |
| H  | -6.6977546 | 0.9497830  | 5.0475002  |
| H  | -6.4997979 | 1.5301029  | 2.6233765  |
| C  | 2.9365211  | -2.9033895 | 1.7456260  |
| C  | 2.2316353  | -2.1876552 | 2.7547517  |
| C  | 4.2425962  | -2.4915008 | 1.4227508  |
| C  | 2.8536011  | -1.1011963 | 3.4253659  |
| C  | 4.1640681  | -0.7378584 | 3.0697239  |
| C  | 4.8738207  | -1.4093394 | 2.0597823  |
| H  | 4.7885704  | -3.0257268 | 0.6284167  |
| C  | 2.1445975  | -0.3627288 | 4.5576317  |
| H  | 4.6397081  | 0.1050989  | 3.5917704  |
| C  | 2.3394408  | 1.1575827  | 4.4990584  |
| H  | 3.3813490  | 1.4614000  | 4.7297607  |
| H  | 1.6733465  | 1.6763810  | 5.2164127  |
| H  | 2.1064808  | 1.5498323  | 3.4887461  |
| C  | 2.5760545  | -0.9321727 | 5.9225016  |
| H  | 1.0569541  | -0.5537293 | 4.4556500  |
| H  | 3.6656628  | -0.7921396 | 6.0819886  |

|   |            |            |            |
|---|------------|------------|------------|
| H | 2.3644374  | -2.0187330 | 5.9864121  |
| H | 2.0398551  | -0.4269761 | 6.7526363  |
| C | 6.3006523  | -1.0269135 | 1.6808867  |
| C | 6.5707753  | 0.4839865  | 1.7410509  |
| H | 7.5787337  | 0.7148698  | 1.3400363  |
| H | 6.5417880  | 0.8657815  | 2.7828647  |
| H | 5.8251312  | 1.0534003  | 1.1508116  |
| C | 7.3120490  | -1.8060971 | 2.5445984  |
| H | 6.4438194  | -1.3503422 | 0.6254543  |
| H | 8.3557686  | -1.5835554 | 2.2391044  |
| H | 7.1532659  | -2.9000171 | 2.4626790  |
| H | 7.2030868  | -1.5321003 | 3.6149958  |
| C | 2.3339830  | -4.1137496 | 1.0322151  |
| C | 2.5358487  | -4.1005134 | -0.4897756 |
| H | 2.0257136  | -4.9691109 | -0.9535918 |
| H | 3.6052109  | -4.1638773 | -0.7789951 |
| H | 2.1110079  | -3.1891738 | -0.9478087 |
| C | 2.8852690  | -5.4167388 | 1.6456184  |
| H | 1.2395700  | -4.0957521 | 1.2107746  |
| H | 2.4129322  | -6.3044023 | 1.1761082  |
| H | 2.7054967  | -5.4693335 | 2.7383320  |
| H | 3.9817757  | -5.4920341 | 1.4878128  |
| H | -2.6044356 | 3.5809012  | -5.1754767 |
| H | -4.8226189 | -1.7284935 | -3.8686842 |
| H | -3.8329039 | 4.8910238  | 0.8699361  |
| C | -3.1078489 | 2.5894172  | -5.2403961 |
| H | -2.3094845 | -3.2831243 | -2.6246640 |
| H | -2.3001761 | 2.2894953  | -7.2507012 |
| H | -1.3139775 | 4.7708538  | 0.4600453  |
| C | -3.0835515 | 1.9939441  | -3.8372114 |
| C | -4.7643087 | -1.9248001 | -2.7776021 |
| C | -2.3506092 | 1.7518257  | -6.2820344 |
| H | -2.8565664 | 0.7833920  | -6.4747762 |
| C | -3.1953309 | 0.6133953  | -3.6100000 |
| C | -4.0137406 | 4.2143573  | 0.0095954  |
| H | -5.0982219 | 3.4905731  | -4.9610113 |
| C | -2.9857385 | 2.8299300  | -2.7103830 |
| C | -4.5625029 | 2.8432464  | -5.6840203 |
| H | -4.5977847 | 3.3315266  | -6.6801642 |
| H | -2.8649165 | 3.9148042  | -2.8693116 |
| C | -2.2281854 | -2.1926361 | -2.8107742 |
| H | -4.8897328 | -3.0172268 | -2.6292255 |
| H | -5.6225294 | -1.4118089 | -2.2976369 |
| C | -3.2671205 | 0.0644312  | -2.3152055 |
| C | -1.5326769 | 4.1801937  | -0.4523710 |
| C | -3.0159575 | 2.3342887  | -1.3928800 |
| H | -4.9237283 | 3.6222752  | 0.2289409  |
| H | -4.2328655 | 4.8434816  | -0.8788267 |
| C | -3.4241169 | -1.4490473 | -2.1861392 |
| C | -3.2113134 | 0.9348210  | -1.1905947 |
| C | -2.7896530 | 3.3143509  | -0.2389348 |
| H | -1.2645552 | -1.8478041 | -2.3891415 |
| H | -0.6462137 | 3.5521113  | -0.6743837 |
| H | -2.1839285 | -2.0478841 | -3.9103289 |
| H | -1.3136690 | 1.5315647  | -5.9593220 |
| H | -1.6555263 | 4.8972726  | -1.2913010 |
| H | -5.1204130 | 1.8860631  | -5.7524487 |
| H | -3.4456770 | -1.7020354 | -1.1082476 |
| H | -2.6135213 | 2.7169028  | 0.6785818  |
| H | -3.2445168 | -0.0710682 | -4.4702254 |
| C | 2.5111156  | 2.0935379  | -6.2592089 |
| C | 1.9753899  | 1.5898113  | -5.0690235 |
| C | 0.9960964  | 2.3405179  | -4.3768675 |
| C | 0.5595786  | 3.5849827  | -4.8861102 |
| C | 1.1143937  | 4.0910474  | -6.0686107 |
| C | 2.0885123  | 3.3430735  | -6.7539121 |
| H | 3.2597515  | 1.5064009  | -6.8122981 |
| H | 2.2752330  | 0.6017140  | -4.6782280 |
| C | 0.4173964  | 1.8484519  | -3.1187657 |
| H | -0.2185080 | 4.1466129  | -4.3439727 |
| H | 0.7826010  | 5.0623305  | -6.4656637 |

|   |            |           |            |
|---|------------|-----------|------------|
| H | 2.5167815  | 3.7337008 | -7.6901891 |
| O | 0.8434172  | 0.8903109 | -2.4736829 |
| H | -0.4709544 | 2.4077478 | -2.7271608 |
| C | 3.8558892  | 2.8114804 | -2.3203611 |
| C | 3.6749094  | 1.8621380 | -1.3417491 |
| C | 2.8850479  | 2.5469091 | -0.2993689 |
| O | 2.5465649  | 3.7963603 | -0.6680101 |
| C | 3.1507523  | 4.0720805 | -1.9526262 |
| O | 2.5278410  | 2.1022300 | 0.8090581  |
| C | 3.9807164  | 0.4404410 | -1.2515134 |
| H | 3.8101261  | 4.9597056 | -1.8241092 |
| H | 2.3380766  | 4.3558700 | -2.6594975 |
| H | 4.0806922  | 0.0937064 | -0.2047152 |
| H | 4.8535971  | 0.1394323 | -1.8601908 |
| H | 4.3830269  | 2.6765558 | -3.2738000 |

## int1; COSMO

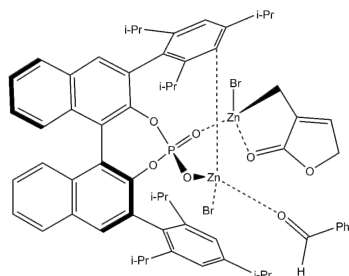

Energy (Hartree) = -11970.02919467

|    |            |            |            |
|----|------------|------------|------------|
| Zn | 3.0682736  | -0.7572067 | 0.7909675  |
| Br | 5.2097228  | -1.3369011 | -0.0349112 |
| Zn | -0.6565371 | 2.6109235  | 1.2923746  |
| Br | -2.9764038 | 2.2870078  | 1.5532027  |
| C  | -1.3028906 | -1.8064581 | 1.9367492  |
| C  | -2.4643373 | -2.3054916 | 1.3401197  |
| C  | -2.9279374 | -3.6098888 | 1.7614204  |
| C  | -4.0018583 | -4.2951818 | 1.1162212  |
| C  | -2.2624201 | -4.2775834 | 2.8568991  |
| C  | -2.7467467 | -5.5430657 | 3.3055913  |
| C  | -1.0892709 | -3.7019631 | 3.4264398  |
| H  | -0.5603410 | -4.2477059 | 4.2231034  |
| C  | -0.5690014 | -2.5104042 | 2.9443863  |
| C  | -2.9673050 | -0.4725772 | -1.9971309 |
| C  | -4.3511020 | -0.3441363 | -2.0242166 |
| H  | -4.8351304 | 0.0828029  | -2.9150120 |
| C  | -5.1615306 | -0.6845176 | -0.9038768 |
| C  | -6.5661869 | -0.4309198 | -0.9060948 |
| C  | -4.5506464 | -1.2529739 | 0.2724825  |
| C  | -5.3684644 | -1.4731521 | 1.4203282  |
| C  | -3.1375015 | -1.5393641 | 0.2545483  |
| C  | -2.3921431 | -1.0807754 | -0.8381274 |
| O  | -0.8217011 | -0.5558597 | 1.5827376  |
| O  | -1.0129041 | -1.2704984 | -0.8492212 |
| P  | -0.0797843 | -0.3291113 | 0.1196055  |
| O  | 1.2821216  | -1.0534482 | 0.0765530  |
| O  | -0.1655740 | 1.1635667  | -0.1643505 |
| C  | -3.8196178 | -6.1599363 | 2.6798370  |
| C  | -4.4365859 | -5.5357170 | 1.5634011  |
| H  | -2.2360431 | -6.0303161 | 4.1511468  |
| H  | -4.1798096 | -7.1384961 | 3.0321139  |
| H  | -4.4853592 | -3.8328460 | 0.2454746  |
| H  | -5.2642319 | -6.0410488 | 1.0425926  |
| C  | -6.7280675 | -1.1943178 | 1.3946216  |
| C  | -7.3387129 | -0.6849615 | 0.2173681  |
| H  | -4.9053471 | -1.8531217 | 2.3416682  |
| H  | -7.3356048 | -1.3608706 | 2.2973154  |

|   |            |            |            |
|---|------------|------------|------------|
| H | -8.4189959 | -0.4741070 | 0.2062428  |
| H | -7.0215046 | -0.0060343 | -1.8145589 |
| C | 1.9340050  | -2.5430955 | 2.7425990  |
| C | 0.7706381  | -1.9491283 | 3.2931759  |
| C | 3.1659928  | -1.8387214 | 2.8550218  |
| C | 0.8574580  | -0.7353484 | 4.0338625  |
| C | 2.0910280  | -0.0654168 | 4.1141418  |
| C | 3.2587642  | -0.5844937 | 3.5221792  |
| H | 4.1011570  | -2.3404688 | 2.5551402  |
| C | -0.3547792 | -0.2464032 | 4.8186582  |
| H | 2.1499045  | 0.8771597  | 4.6778656  |
| C | -0.5722188 | 1.2688787  | 4.8035284  |
| H | 0.2779061  | 1.8279930  | 5.2460518  |
| H | -1.4771336 | 1.5254997  | 5.3896131  |
| H | -0.7367363 | 1.6337624  | 3.7727276  |
| C | -0.2513712 | -0.7947269 | 6.2583461  |
| H | -1.2525041 | -0.7076085 | 4.3589127  |
| H | 0.6374980  | -0.3795821 | 6.7783650  |
| H | -0.1615949 | -1.9001157 | 6.2661376  |
| H | -1.1518483 | -0.5171790 | 6.8433891  |
| C | 4.6184481  | 0.0824517  | 3.6906415  |
| C | 4.5891425  | 1.5920749  | 3.4079231  |
| H | 5.6110071  | 2.0161826  | 3.4780428  |
| H | 3.9518033  | 2.1399741  | 4.1322018  |
| H | 4.1979362  | 1.7992655  | 2.3924796  |
| C | 5.1807049  | -0.2227693 | 5.0926149  |
| H | 5.2965265  | -0.3848244 | 2.9426242  |
| H | 6.2009586  | 0.1982968  | 5.2026109  |
| H | 5.2371785  | -1.3143802 | 5.2770249  |
| H | 4.5398757  | 0.2224970  | 5.8821706  |
| C | 1.9131021  | -3.9296380 | 2.1060782  |
| C | 2.6448124  | -4.0284983 | 0.7596405  |
| H | 2.5540576  | -5.0586329 | 0.3596968  |
| H | 3.7276856  | -3.8022228 | 0.8388238  |
| H | 2.1975596  | -3.3411353 | 0.0140283  |
| C | 2.4621765  | -4.9558924 | 3.1189355  |
| H | 0.8527150  | -4.1853890 | 1.9153743  |
| H | 2.3852409  | -5.9832445 | 2.7080649  |
| H | 1.9043535  | -4.9247555 | 4.0767987  |
| H | 3.5312344  | -4.7605066 | 3.3461152  |
| H | 0.7688967  | -2.7859557 | -5.8241392 |
| H | -1.3325087 | -2.7597064 | -5.8424416 |
| H | -4.7241293 | 3.6077955  | -2.8785507 |
| C | 0.8714306  | 1.6785200  | -5.8631025 |
| H | -0.1035042 | -4.0906844 | -3.1917707 |
| H | 3.0575293  | 1.8151081  | -6.0277377 |
| H | -2.7485475 | 4.2612798  | -1.3224037 |
| C | -0.1834170 | 1.1066924  | -4.9243642 |
| C | -1.9635711 | -2.9451695 | -4.9478552 |
| C | 2.2933751  | 1.3294690  | -5.3857147 |
| H | 2.4714858  | 0.2343890  | -5.4217707 |
| C | -0.3024800 | -0.2790812 | -4.7172242 |
| C | -4.0524066 | 2.9250137  | -3.4391215 |
| H | -0.3666204 | 1.5231045  | -7.6744308 |
| C | -1.0553785 | 1.9495351  | -4.2185309 |
| C | 0.6450223  | 1.2391017  | -7.3205219 |
| H | 1.3914589  | 1.7057066  | -7.9966504 |
| H | -0.9830803 | 3.0361171  | -4.3849546 |
| C | 0.0275444  | -3.0019258 | -3.3622611 |
| H | -2.0871742 | -4.0433103 | -4.8429144 |
| H | -2.9617221 | -2.5034597 | -5.1443140 |
| C | -1.2258130 | -0.8224097 | -3.8079791 |
| C | -2.1098977 | 3.6634659  | -2.0014289 |
| C | -1.9946297 | 1.4625866  | -3.2886225 |
| H | -4.6603320 | 2.0755851  | -3.8103681 |
| H | -3.6748820 | 3.4734412  | -4.3282826 |
| C | -1.3253694 | -2.3420736 | -3.6815229 |
| C | -2.0691847 | 0.0568441  | -3.0697243 |
| C | -2.8851935 | 2.4586729  | -2.5480845 |
| H | 0.4770640  | -2.5617805 | -2.4509649 |
| H | -1.2357800 | 3.3348111  | -1.4115144 |



|   |            |            |            |
|---|------------|------------|------------|
| H | 0.7491740  | -2.8858787 | -4.1979258 |
| H | 2.4589284  | 1.6630365  | -4.3419151 |
| H | -1.7548838 | 4.3421154  | -2.8060327 |
| H | 0.7411091  | 0.1380351  | -7.4265260 |
| H | -2.0093810 | -2.5693179 | -2.8391928 |
| H | -3.3090707 | 1.9419577  | -1.6639136 |
| H | 0.3537192  | -0.9645035 | -5.2773878 |
| C | 1.6480919  | 4.0933938  | -2.6957373 |
| C | 1.9906414  | 3.1167242  | -1.7576177 |
| C | 3.3501434  | 2.7466055  | -1.6045955 |
| C | 4.3497428  | 3.3355450  | -2.4177628 |
| C | 3.9955249  | 4.3118813  | -3.3559158 |
| C | 2.6466804  | 4.6928485  | -3.4879383 |
| H | 0.5969283  | 4.3918162  | -2.8082467 |
| H | 1.2296764  | 2.6081028  | -1.1452788 |
| C | 3.7377110  | 1.7335982  | -0.6349962 |
| H | 5.3995881  | 3.0222947  | -2.3025312 |
| H | 4.7657733  | 4.7768808  | -3.9889954 |
| H | 2.3673761  | 5.4616420  | -4.2247739 |
| O | 2.9510076  | 1.2481474  | 0.2022524  |
| H | 4.7938871  | 1.3630174  | -0.6763006 |
| C | 2.9477701  | 4.6818183  | 1.3680303  |
| C | 1.6717823  | 4.2364490  | 1.5270094  |
| C | 0.8418361  | 5.0386693  | 0.5900948  |
| O | 1.5933581  | 5.9861362  | -0.0253170 |
| C | 2.9652870  | 5.8056454  | 0.3778653  |
| O | -0.3455486 | 4.8587012  | 0.3271366  |
| C | 0.9978718  | 3.1841989  | 2.3121356  |
| H | 3.3458065  | 6.7616114  | 0.8010597  |
| H | 3.5565036  | 5.5825941  | -0.5393327 |
| H | 0.5660719  | 3.6331879  | 3.2349202  |
| H | 1.6854735  | 2.3741885  | 2.6185744  |
| H | 3.8519461  | 4.3140156  | 1.8728728  |

int1

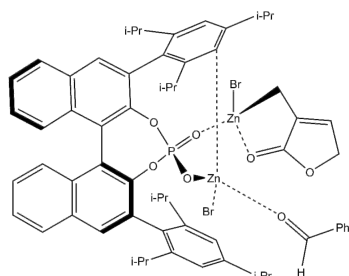

Energy (Hartree) = -11970.01472078

|    |            |            |            |
|----|------------|------------|------------|
| Zn | 3.0785321  | -0.7728064 | 0.8015998  |
| Br | 5.2422392  | -1.3256766 | 0.0439055  |
| Zn | -0.6699613 | 2.6199094  | 1.2985897  |
| Br | -2.9719926 | 2.2623833  | 1.5482520  |
| C  | -1.2962262 | -1.8107111 | 1.9414282  |
| C  | -2.4558364 | -2.3086224 | 1.3403427  |
| C  | -2.9221815 | -3.6128751 | 1.7589367  |
| C  | -3.9940039 | -4.2960360 | 1.1085397  |
| C  | -2.2628428 | -4.2824352 | 2.8566747  |
| C  | -2.7515109 | -5.5469079 | 3.3019312  |
| C  | -1.0924012 | -3.7076704 | 3.4316767  |
| H  | -0.5663605 | -4.2537317 | 4.2302239  |
| C  | -0.5690808 | -2.5162242 | 2.9530024  |
| C  | -2.9502731 | -0.4690593 | -1.9935700 |
| C  | -4.3341395 | -0.3431726 | -2.0230703 |
| H  | -4.8147564 | 0.0870594  | -2.9140321 |
| C  | -5.1474211 | -0.6864830 | -0.9064640 |
| C  | -6.5517207 | -0.4339541 | -0.9108844 |
| C  | -4.5386155 | -1.2557019 | 0.2700893  |
| C  | -5.3582093 | -1.4767710 | 1.4161202  |
| C  | -3.1253700 | -1.5414097 | 0.2539510  |

|   |            |            |            |
|---|------------|------------|------------|
| C | -2.3769267 | -1.0800585 | -0.8354272 |
| O | -0.8099338 | -0.5620668 | 1.5907258  |
| O | -0.9971539 | -1.2701327 | -0.8434665 |
| P | -0.0652009 | -0.3320009 | 0.1294222  |
| O | 1.2954481  | -1.0629132 | 0.0924331  |
| O | -0.1387032 | 1.1604118  | -0.1527959 |
| C | -3.8223399 | -6.1613182 | 2.6715559  |
| C | -4.4329412 | -5.5354073 | 1.5532930  |
| H | -2.2455477 | -6.0354577 | 4.1496170  |
| H | -4.1862130 | -7.1390139 | 3.0222957  |
| H | -4.4720753 | -3.8311589 | 0.2363033  |
| H | -5.2593548 | -6.0386002 | 1.0286131  |
| C | -6.7175318 | -1.1993252 | 1.3875651  |
| C | -7.3261510 | -0.6901074 | 0.2099834  |
| H | -4.8956717 | -1.8547988 | 2.3383482  |
| H | -7.3261816 | -1.3655620 | 2.2894448  |
| H | -8.4063608 | -0.4794359 | 0.1970269  |
| H | -7.0047671 | -0.0065809 | -1.8192268 |
| C | 1.9354449  | -2.5515636 | 2.7707037  |
| C | 0.7679951  | -1.9555188 | 3.3104240  |
| C | 3.1662323  | -1.8480857 | 2.8911309  |
| C | 0.8490865  | -0.7385170 | 4.0465221  |
| C | 2.0824502  | -0.0694611 | 4.1329585  |
| C | 3.2543265  | -0.5913655 | 3.5520159  |
| H | 4.1028494  | -2.3470965 | 2.5918295  |
| C | -0.3697599 | -0.2445726 | 4.8183620  |
| H | 2.1361347  | 0.8772911  | 4.6902764  |
| C | -0.5827482 | 1.2711518  | 4.8016826  |
| H | 0.2645206  | 1.8289339  | 5.2517209  |
| H | -1.4922040 | 1.5307323  | 5.3789838  |
| H | -0.7406115 | 1.6368811  | 3.7703393  |
| C | -0.2842603 | -0.7947612 | 6.2583951  |
| H | -1.2641484 | -0.7014604 | 4.3480795  |
| H | 0.6007793  | -0.3848114 | 6.7889623  |
| H | -0.1995041 | -1.9004765 | 6.2664051  |
| H | -1.1891911 | -0.5140735 | 6.8349057  |
| C | 4.6120920  | 0.0791783  | 3.7230430  |
| C | 4.5847315  | 1.5813453  | 3.4024643  |
| H | 5.6044555  | 2.0100460  | 3.4785027  |
| H | 3.9337012  | 2.1467884  | 4.1007473  |
| H | 4.2098319  | 1.7609260  | 2.3756468  |
| C | 5.1584964  | -0.1914434 | 5.1379008  |
| H | 5.2984108  | -0.4033611 | 2.9925247  |
| H | 6.1774511  | 0.2320197  | 5.2510703  |
| H | 5.2129859  | -1.2781179 | 5.3495876  |
| H | 4.5091439  | 0.2709896  | 5.9103951  |
| C | 1.9201639  | -3.9383892 | 2.1337330  |
| C | 2.6414140  | -4.0287071 | 0.7806506  |
| H | 2.5624989  | -5.0602699 | 0.3818175  |
| H | 3.7217544  | -3.7863520 | 0.8477672  |
| H | 2.1766442  | -3.3495869 | 0.0383989  |
| C | 2.4841971  | -4.9619758 | 3.1405470  |
| H | 0.8601416  | -4.2016210 | 1.9514569  |
| H | 2.4115181  | -5.9898359 | 2.7301670  |
| H | 1.9340747  | -4.9355737 | 4.1030432  |
| H | 3.5537569  | -4.7610812 | 3.3603160  |
| H | 0.7557494  | 2.8178574  | -5.8239369 |
| H | -1.3131578 | -2.7390692 | -5.8433551 |
| H | -4.7263507 | 3.6097727  | -2.8573270 |
| C | 0.8536628  | 1.7103625  | -5.8776212 |
| H | -0.0622417 | -4.0665744 | -3.1971421 |
| H | 3.0371996  | 1.8426722  | -6.0829039 |
| H | -2.7462762 | 4.2567530  | -1.2943310 |
| C | -0.1866983 | 1.1315325  | -4.9271507 |
| C | -1.9377746 | -2.9303821 | -4.9456201 |
| C | 2.2833651  | 1.3514387  | -5.4329217 |
| H | 2.4583964  | 0.2567529  | -5.4863526 |
| C | -0.2932437 | -0.2546792 | -4.7188895 |
| C | -4.0542232 | 2.9319002  | -3.4229159 |
| H | -0.4208701 | 1.5812492  | -7.6648633 |
| C | -1.0609156 | 1.9674480  | -4.2165980 |

|   |            |            |            |
|---|------------|------------|------------|
| C | 0.5964549  | 1.2893788  | -7.3353377 |
| H | 1.3311893  | 1.7592270  | -8.0220101 |
| H | -0.9992442 | 3.0546315  | -4.3839515 |
| C | 0.0608448  | -2.9771037 | -3.3685162 |
| H | -2.0539674 | -4.0294911 | -4.8428007 |
| H | -2.9392273 | -2.4942980 | -5.1365456 |
| C | -1.2083719 | -0.8051935 | -3.8062729 |
| C | -2.1120100 | 3.6677723  | -1.9846428 |
| C | -1.9920798 | 1.4738478  | -3.2823529 |
| H | -4.6607558 | 2.0834127  | -3.7984782 |
| H | -3.6804598 | 3.4854163  | -4.3104187 |
| C | -1.2973673 | -2.3255502 | -3.6814306 |
| C | -2.0548834 | 0.0675206  | -3.0643817 |
| C | -2.8848324 | 2.4638099  | -2.5361277 |
| H | 0.5130386  | -2.5342948 | -2.4600010 |
| H | -1.2325266 | 3.3378550  | -1.4036151 |
| H | 0.7783614  | -2.8573411 | -4.2071184 |
| H | 2.4703499  | 1.6692605  | -4.3879816 |
| H | -1.7658206 | 4.3559182  | -2.7853385 |
| H | 0.6837114  | 0.1891489  | -7.4551613 |
| H | -1.9763177 | -2.5582398 | -2.8366039 |
| H | -3.3063694 | 1.9438123  | -1.6527633 |
| H | 0.3651096  | -0.9352527 | -5.2822844 |
| C | 1.6296295  | 4.0916213  | -2.6890765 |
| C | 1.9785399  | 3.1054728  | -1.7627579 |
| C | 3.3337772  | 2.7100128  | -1.6455895 |
| C | 4.3220214  | 3.2800216  | -2.4852593 |
| C | 3.9623217  | 4.2659459  | -3.4106811 |
| C | 2.6182340  | 4.6741749  | -3.5046801 |
| H | 0.5814031  | 4.4100552  | -2.7685110 |
| H | 1.2241946  | 2.6078695  | -1.1332167 |
| C | 3.7266325  | 1.6927506  | -0.6806779 |
| H | 5.3679066  | 2.9441274  | -2.4001121 |
| H | 4.7239053  | 4.7164001  | -4.0645115 |
| H | 2.3348714  | 5.4514349  | -4.2310615 |
| O | 2.9587524  | 1.2400575  | 0.1895054  |
| H | 4.7695936  | 1.2876689  | -0.7543051 |
| C | 2.9648632  | 4.6486706  | 1.3610517  |
| C | 1.6825508  | 4.2242349  | 1.5243706  |
| O | 0.8633787  | 5.0301220  | 0.5774232  |
| C | 1.6315509  | 5.9649446  | -0.0425567 |
| C | 2.9974669  | 5.7655054  | 0.3611894  |
| O | -0.3209394 | 4.8578830  | 0.3086426  |
| C | 0.9925985  | 3.1888597  | 2.3147191  |
| H | 3.3942990  | 6.7188355  | 0.7773196  |
| H | 3.5850742  | 5.5270120  | -0.5552495 |
| H | 0.5530041  | 3.6548475  | 3.2254641  |
| H | 1.6701331  | 2.3779618  | 2.6408587  |
| H | 3.8615855  | 4.2704003  | 1.8714026  |

## int2; COSMO

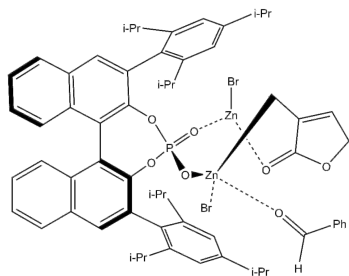

Energy (Hartree) = -11970.0424813

|    |            |            |            |
|----|------------|------------|------------|
| Zn | 1.6282426  | 1.4269758  | 2.1199748  |
| Br | 3.7527761  | 2.3841720  | 2.5513390  |
| Zn | -2.4513045 | 1.0334531  | 1.1099611  |
| Br | -4.2940764 | -0.3181950 | 1.0676173  |
| C  | -0.0469432 | -2.6969078 | 0.8297711  |
| C  | -0.5970413 | -3.3505272 | -0.2777189 |
| C  | -0.2791320 | -4.7443299 | -0.4732226 |

|   |            |            |            |
|---|------------|------------|------------|
| C | -0.6498720 | -5.4666746 | -1.6480885 |
| C | 0.4667338  | -5.4405291 | 0.5471926  |
| C | 0.7504131  | -6.8298090 | 0.3815598  |
| C | 0.9446006  | -4.7211755 | 1.6788916  |
| H | 1.5134033  | -5.2620324 | 2.4507495  |
| C | 0.7500766  | -3.3518036 | 1.8166356  |
| C | -1.7078654 | -0.7081037 | -2.8305892 |
| C | -2.9362476 | -1.2268552 | -3.2280036 |
| H | -3.4964926 | -0.7192799 | -4.0274940 |
| C | -3.5198505 | -2.3619607 | -2.5993125 |
| C | -4.8304724 | -2.8072360 | -2.9473819 |
| C | -2.7920756 | -3.0525477 | -1.5639443 |
| C | -3.4401130 | -4.1231727 | -0.8787394 |
| C | -1.4609163 | -2.6070543 | -1.2345778 |
| C | -0.9926019 | -1.4311882 | -1.8285818 |
| O | -0.3314285 | -1.3495856 | 1.0358662  |
| O | 0.2556640  | -0.9282225 | -1.4297838 |
| P | 0.2327859  | -0.1710757 | 0.0225567  |
| O | 1.6472528  | 0.2889747  | 0.3607649  |
| O | -0.8629175 | 0.9145506  | 0.0467172  |
| C | 0.3498995  | -7.5079273 | -0.7597397 |
| C | -0.3423138 | -6.8130668 | -1.7878029 |
| H | 1.3110950  | -7.3491503 | 1.1746377  |
| H | 0.5808122  | -8.5774813 | -0.8790078 |
| H | -1.1788430 | -4.9422759 | -2.4558654 |
| H | -0.6333765 | -7.3450085 | -2.7065105 |
| C | -4.7243503 | -4.5187886 | -1.2257657 |
| C | -5.4222987 | -3.8678136 | -2.2784635 |
| H | -2.9162814 | -4.6265405 | -0.0544443 |
| H | -5.2088341 | -5.3394734 | -0.6750101 |
| H | -6.4377486 | -4.1957047 | -2.5484452 |
| H | -5.3711390 | -2.2765315 | -3.7467668 |
| C | 2.6644282  | -2.0144021 | 2.7616761  |
| C | 1.3648019  | -2.5704142 | 2.9367224  |
| C | 3.2201111  | -1.2688826 | 3.8185380  |
| C | 0.6616511  | -2.3967745 | 4.1578011  |
| C | 1.2749062  | -1.6610741 | 5.1905381  |
| C | 2.5505916  | -1.0875553 | 5.0425088  |
| H | 4.2147139  | -0.8157868 | 3.6932710  |
| C | -0.7385636 | -2.9797731 | 4.3529373  |
| H | 0.7341932  | -1.5294626 | 6.1403567  |
| C | -1.8337470 | -1.9290714 | 4.0837282  |
| H | -1.7459781 | -1.0750459 | 4.7875607  |
| H | -2.8437240 | -2.3716043 | 4.2062635  |
| H | -1.7695572 | -1.5294561 | 3.0535801  |
| C | -0.9279675 | -3.6322967 | 5.7322119  |
| H | -0.8648757 | -3.7804226 | 3.5943659  |
| H | -0.9200348 | -2.8829538 | 6.5510482  |
| H | -0.1310101 | -4.3735163 | 5.9451060  |
| H | -1.9059096 | -4.1535868 | 5.7798954  |
| C | 3.1951377  | -0.2691073 | 6.1564208  |
| C | 2.5762016  | 1.1388580  | 6.2414310  |
| H | 3.0785924  | 1.7445496  | 7.0244516  |
| H | 1.4965401  | 1.0838088  | 6.4978258  |
| H | 2.6817064  | 1.6694396  | 5.2734111  |
| C | 3.1556729  | -0.9839186 | 7.5168618  |
| H | 4.2626449  | -0.1379387 | 5.8745818  |
| H | 3.7158703  | -0.4040778 | 8.2790970  |
| H | 3.6033467  | -1.9966735 | 7.4566581  |
| H | 2.1161360  | -1.0964676 | 7.8899370  |
| C | 3.4827887  | -2.2979411 | 1.4998034  |
| C | 4.4596878  | -1.1803983 | 1.1077943  |
| H | 4.9075873  | -1.4072447 | 0.1187601  |
| H | 5.2970624  | -1.0905431 | 1.8306243  |
| H | 3.9606481  | -0.1967476 | 1.0426822  |
| C | 4.2497918  | -3.6284614 | 1.6528955  |
| H | 2.7641492  | -2.4165011 | 0.6606671  |
| H | 4.8188097  | -3.8590928 | 0.7283746  |
| H | 3.5748034  | -4.4813505 | 1.8574398  |
| H | 4.9733799  | -3.5616162 | 2.4922171  |
| H | -0.1720061 | 5.0827838  | -4.7251762 |

|   |            |            |            |
|---|------------|------------|------------|
| H | 1.1501446  | -0.3424676 | -6.6754297 |
| H | -5.2488564 | 2.0553366  | -2.3339842 |
| C | 0.1172585  | 4.2382352  | -5.3883936 |
| H | 2.7379253  | -1.6023322 | -4.2177861 |
| H | 1.8561537  | 5.3645762  | -6.0868715 |
| H | -3.7278839 | 2.9188537  | -0.4271701 |
| C | -0.2720218 | 2.9612543  | -4.6533235 |
| C | 0.6710509  | -1.1123621 | -6.0349331 |
| C | 1.6199125  | 4.3622868  | -5.6742745 |
| H | 1.9591902  | 3.6169662  | -6.4234245 |
| C | 0.3994900  | 1.7441766  | -4.8519143 |
| C | -4.3811188 | 2.0490297  | -3.0256942 |
| H | -1.7916931 | 4.3383264  | -6.4820428 |
| C | -1.3832741 | 2.9618129  | -3.7907084 |
| C | -0.7028468 | 4.3716827  | -6.6876997 |
| H | -0.4777484 | 5.3273584  | -7.2058008 |
| H | -1.9004054 | 3.9167504  | -3.6001925 |
| C | 2.2094669  | -0.6396217 | -4.0583672 |
| H | 1.1895487  | -2.0749823 | -6.2247200 |
| H | -0.3819880 | -1.2178065 | -6.3666494 |
| C | -0.0253287 | 0.5448310  | -4.2491279 |
| C | -2.9271990 | 3.0025627  | -1.1942341 |
| C | -1.8537274 | 1.7928396  | -3.1667542 |
| H | -4.5337342 | 1.2288029  | -3.7544642 |
| H | -4.3864800 | 3.0044241  | -3.5916610 |
| C | 0.7515832  | -0.7370424 | -4.5435850 |
| C | -1.1775437 | 0.5623056  | -3.4173785 |
| C | -3.0668902 | 1.8829859  | -2.2414529 |
| C | 2.2507090  | -0.3994034 | -2.9780485 |
| H | -1.9377014 | 2.9737072  | -0.6987079 |
| H | 2.7704232  | 0.1433290  | -4.6106953 |
| H | 2.2254825  | 4.2140501  | -4.7575198 |
| H | -3.0314496 | 4.0131298  | -1.6409965 |
| H | -0.4676399 | 3.5401895  | -7.3849256 |
| H | 0.2728575  | -1.5632665 | -3.9806262 |
| H | -3.1330253 | 0.9237129  | -1.6876502 |
| H | 1.2813467  | 1.7159974  | -5.5099153 |
| C | -0.7904048 | 6.5588066  | -1.0747700 |
| C | -0.3369051 | 5.4523730  | -0.3514221 |
| C | 0.8288773  | 4.7683844  | -0.7717246 |
| C | 1.5353578  | 5.2107991  | -1.9115401 |
| C | 1.0864724  | 6.3305951  | -2.6234719 |
| C | -0.0781371 | 6.9992955  | -2.2082704 |
| H | -1.7006378 | 7.0894492  | -0.7569675 |
| H | -0.8723611 | 5.1003849  | 0.5430493  |
| C | 1.3279927  | 3.6082511  | -0.0269169 |
| H | 2.4412379  | 4.6706160  | -2.2297903 |
| H | 1.6401759  | 6.6805096  | -3.5072635 |
| H | -0.4357580 | 7.8747750  | -2.7720984 |
| O | 0.7939369  | 3.1798227  | 1.0020246  |
| H | 2.2468297  | 3.1073268  | -0.4288656 |
| C | 0.1191561  | 3.5620812  | 4.4673818  |
| C | -0.3879616 | 2.5707168  | 3.6664352  |
| C | -1.4926548 | 3.2118525  | 2.9266300  |
| O | -1.6123381 | 4.5092706  | 3.2376940  |
| C | -0.6054889 | 4.8369583  | 4.2197839  |
| O | -2.3067279 | 2.7252731  | 2.1125769  |
| C | 0.0560329  | 1.2039785  | 3.3922927  |
| H | -1.1246799 | 5.2620911  | 5.1068547  |
| H | 0.0392623  | 5.6357101  | 3.7888741  |
| H | -0.7495839 | 0.5706329  | 2.9697976  |
| H | 0.4542927  | 0.6846927  | 4.2823513  |
| H | 0.9726026  | 3.4768890  | 5.1524331  |

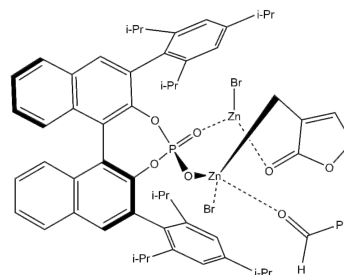

Energy (Hartree) = -11970.03004289

|    |            |            |            |
|----|------------|------------|------------|
| Zn | 1.6334684  | 1.3969149  | 2.1400095  |
| Br | 3.7209288  | 2.4102063  | 2.5684619  |
| Zn | -2.4783034 | 0.9847728  | 1.1155334  |
| Br | -4.3175109 | -0.3591595 | 1.0554873  |
| C  | -0.0521740 | -2.6965578 | 0.8296560  |
| C  | -0.6015186 | -3.3522726 | -0.2770135 |
| C  | -0.2787030 | -4.7448165 | -0.4727258 |
| C  | -0.6504472 | -5.4694040 | -1.6455472 |
| C  | 0.4727245  | -5.4375089 | 0.5457937  |
| C  | 0.7605822  | -6.8253555 | 0.3796662  |
| C  | 0.9509169  | -4.7154903 | 1.6753256  |
| H  | 1.5247340  | -5.2522781 | 2.4463568  |
| C  | 0.7511810  | -3.3471161 | 1.8140729  |
| C  | -1.7218977 | -0.7106257 | -2.8262153 |
| C  | -2.9477786 | -1.2334135 | -3.2249527 |
| H  | -3.5086876 | -0.7257302 | -4.0238582 |
| C  | -3.5275680 | -2.3715082 | -2.5986934 |
| C  | -4.8360075 | -2.8212474 | -2.9472089 |
| C  | -2.7977092 | -3.0607741 | -1.5640554 |
| C  | -3.4421301 | -4.1344354 | -0.8806801 |
| C  | -1.4684196 | -2.6110029 | -1.2329985 |
| C  | -1.0042666 | -1.4322560 | -1.8247610 |
| O  | -0.3437178 | -1.3514567 | 1.0375591  |
| O  | 0.2415236  | -0.9248638 | -1.4264658 |
| P  | 0.2185368  | -0.1688457 | 0.0270877  |
| O  | 1.6328002  | 0.2910546  | 0.3633779  |
| O  | -0.8813398 | 0.9126450  | 0.0564570  |
| C  | 0.3587909  | -7.5058038 | -0.7591039 |
| C  | -0.3391344 | -6.8144982 | -1.7848222 |
| H  | 1.3262116  | -7.3418935 | 1.1710392  |
| H  | 0.5932686  | -8.5745584 | -0.8780623 |
| H  | -1.1843914 | -4.9468154 | -2.4510561 |
| H  | -0.6319498 | -7.3481380 | -2.7019160 |
| C  | -4.7242837 | -4.5341444 | -1.2289313 |
| C  | -5.4240329 | -3.8845298 | -2.2804216 |
| H  | -2.9162325 | -4.6358753 | -0.0567075 |
| H  | -5.2060470 | -5.3567325 | -0.6788387 |
| H  | -6.4384831 | -4.2149585 | -2.5507155 |
| H  | -5.3786889 | -2.2904587 | -3.7450863 |
| C  | 2.6573820  | -1.9943076 | 2.7559207  |
| C  | 1.3635618  | -2.5632746 | 2.9337394  |
| C  | 3.2092747  | -1.2468185 | 3.8133636  |
| C  | 0.6632978  | -2.4009394 | 4.1577994  |
| C  | 1.2746723  | -1.6657205 | 5.1917229  |
| C  | 2.5438509  | -1.0794590 | 5.0414780  |
| H  | 4.1980805  | -0.7821164 | 3.6853953  |
| C  | -0.7322703 | -2.9948559 | 4.3542820  |
| H  | 0.7375272  | -1.5456174 | 6.1449676  |
| C  | -1.8362119 | -1.9542281 | 4.0818701  |
| H  | -1.7565140 | -1.0981194 | 4.7841015  |
| H  | -2.8431391 | -2.4035344 | 4.2037203  |
| H  | -1.7754064 | -1.5555637 | 3.0512427  |
| C  | -0.9175325 | -3.6456213 | 5.7347379  |
| H  | -0.8516682 | -3.7985154 | 3.5977106  |
| H  | -0.9203123 | -2.8944677 | 6.5519028  |
| H  | -0.1128807 | -4.3768280 | 5.9523952  |

int2

|   |            |            |            |   |            |           |            |
|---|------------|------------|------------|---|------------|-----------|------------|
| H | -1.8897584 | -4.1773256 | 5.7825910  | O | 0.7711084  | 3.1689786 | 1.0019451  |
| C | 3.1867748  | -0.2623624 | 6.1574154  | H | 2.2996447  | 3.1222383 | -0.3461394 |
| C | 2.5713306  | 1.1471930  | 6.2411758  | C | 0.1390024  | 3.5684137 | 4.4123714  |
| H | 3.0710527  | 1.7500846  | 7.0280521  | C | -0.3870259 | 2.5593024 | 3.6462754  |
| H | 1.4901275  | 1.0945289  | 6.4918583  | C | -1.4953155 | 3.1888694 | 2.8993069  |
| H | 2.6858415  | 1.6792179  | 5.2749285  | O | -1.5965938 | 4.4987147 | 3.1723427  |
| C | 3.1437992  | -0.9774028 | 7.5173581  | C | -0.5716817 | 4.8440864 | 4.1264716  |
| H | 4.2549220  | -0.1325723 | 5.8776373  | O | -2.3223558 | 2.6860717 | 2.1122552  |
| H | 3.7069648  | -0.4013879 | 8.2802053  | C | 0.0456761  | 1.1858847 | 3.4004145  |
| H | 3.5850374  | -1.9927446 | 7.4568200  | H | -1.0711027 | 5.3142722 | 5.0028428  |
| H | 2.1041900  | -1.0846342 | 7.8917092  | H | 0.0815643  | 5.6134521 | 3.6550108  |
| C | 3.4758335  | -2.2680074 | 1.4918095  | H | -0.7594740 | 0.5498792 | 2.9826807  |
| C | 4.4525799  | -1.1478686 | 1.1069114  | H | 0.4443827  | 0.6797501 | 4.2976295  |
| H | 4.8978350  | -1.3665956 | 0.1150591  | H | 1.0057818  | 3.4933040 | 5.0814857  |
| H | 5.2923074  | -1.0648048 | 1.8276317  |   |            |           |            |
| H | 3.9581760  | -0.1614892 | 1.0497934  |   |            |           |            |
| C | 4.2447120  | -3.5983270 | 1.6369424  |   |            |           |            |
| H | 2.7574341  | -2.3824734 | 0.6518659  |   |            |           |            |
| H | 4.8170824  | -3.8203580 | 0.7125507  |   |            |           |            |
| H | 3.5714191  | -4.4546068 | 1.8317172  |   |            |           |            |
| H | 4.9652935  | -3.5369597 | 2.4790264  |   |            |           |            |
| H | -0.1625543 | 5.0881720  | -4.6745216 |   |            |           |            |
| H | 1.1313761  | -0.3303434 | -6.6677956 |   |            |           |            |
| H | -5.2707045 | 2.0409559  | -2.3406402 |   |            |           |            |
| C | 0.1134431  | 4.2492193  | -5.3507971 |   |            |           |            |
| H | 2.7238653  | -1.6010746 | -4.2142940 |   |            |           |            |
| H | 1.8576845  | 5.3691377  | -6.0493146 |   |            |           |            |
| H | -3.7602426 | 2.9065894  | -0.4229830 |   |            |           |            |
| C | -0.2809172 | 2.9667477  | -4.6277755 |   |            |           |            |
| C | 0.6542498  | -1.1023967 | -6.0285067 |   |            |           |            |
| C | 1.6146584  | 4.3642493  | -5.6468887 |   |            |           |            |
| H | 1.9417298  | 3.6261592  | -6.4083822 |   |            |           |            |
| C | 0.3898998  | 1.7505266  | -4.8309665 |   |            |           |            |
| C | -4.3993118 | 2.0409911  | -3.0275013 |   |            |           |            |
| H | -1.8023846 | 4.3773741  | -6.4283867 |   |            |           |            |
| C | -1.3965441 | 2.9628861  | -3.7713280 |   |            |           |            |
| C | -0.7151407 | 4.4056726  | -6.6418858 |   |            |           |            |
| H | -0.4870405 | 5.3653219  | -7.1513228 |   |            |           |            |
| H | -1.9140294 | 3.9170634  | -3.5777652 |   |            |           |            |
| C | 2.1967810  | -0.6381403 | -4.0526157 |   |            |           |            |
| H | 1.1723947  | -2.0640247 | -6.2238047 |   |            |           |            |
| H | -0.3993077 | -1.2061679 | -6.3584692 |   |            |           |            |
| C | -0.0383624 | 0.5482980  | -4.2368748 |   |            |           |            |
| C | -2.9573528 | 2.9946981  | -1.1867700 |   |            |           |            |
| C | -1.8709283 | 1.7911858  | -3.1561664 |   |            |           |            |
| H | -4.5451692 | 1.2228635  | -3.7598076 |   |            |           |            |
| H | -4.4054369 | 2.9974479  | -3.5916443 |   |            |           |            |
| C | 0.7383063  | -0.7325461 | -4.5361025 |   |            |           |            |
| C | -1.1935606 | 0.5620651  | -3.4096207 |   |            |           |            |
| C | -3.0888475 | 1.8769518  | -2.2368141 |   |            |           |            |
| H | 2.2409973  | -0.4002964 | -2.9720590 |   |            |           |            |
| H | -1.9710381 | 2.9645349  | -0.6852382 |   |            |           |            |
| H | 2.7591894  | 0.1444536  | -4.6039282 |   |            |           |            |
| H | 2.2261754  | 4.1979935  | -4.7372553 |   |            |           |            |
| H | -3.0616372 | 4.0057977  | -1.6327361 |   |            |           |            |
| H | -0.4930662 | 3.5803587  | -7.3503240 |   |            |           |            |
| H | 0.2598010  | -1.5602917 | -3.9752933 |   |            |           |            |
| H | -3.1565962 | 0.9169624  | -1.6844817 |   |            |           |            |
| H | 1.2746869  | 1.7246173  | -5.4849924 |   |            |           |            |
| C | -0.7571136 | 6.5319996  | -1.1345743 |   |            |           |            |
| C | -0.3196633 | 5.4312862  | -0.3926320 |   |            |           |            |
| C | 0.8711989  | 4.7633690  | -0.7633518 |   |            |           |            |
| C | 1.6174918  | 5.2153245  | -1.8726310 |   |            |           |            |
| C | 1.1833555  | 6.3282041  | -2.6041953 |   |            |           |            |
| C | -0.0053904 | 6.9818893  | -2.2377249 |   |            |           |            |
| H | -1.6867472 | 7.0501186  | -0.8542494 |   |            |           |            |
| H | -0.8856885 | 5.0709932  | 0.4795599  |   |            |           |            |
| C | 1.3515556  | 3.6073884  | 0.0053118  |   |            |           |            |
| H | 2.5421013  | 4.6861400  | -2.1534995 |   |            |           |            |
| H | 1.7667303  | 6.6826794  | -3.4668255 |   |            |           |            |
| H | -0.3510421 | 7.8523357  | -2.8166856 |   |            |           |            |

### int3; COSMO

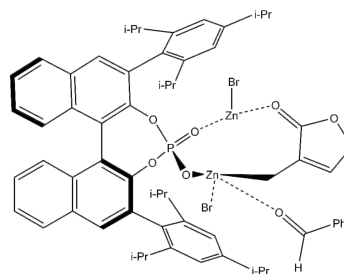

Energy (Hartree) = -11970.03958608

|    |            |            |            |
|----|------------|------------|------------|
| Zn | 1.9922417  | 0.2441620  | 2.3805004  |
| Br | 4.1161264  | -0.1134971 | 3.3506100  |
| Zn | -2.4137248 | 0.2174932  | 0.8431812  |
| Br | -4.2213063 | -0.8083476 | -0.0977585 |
| C  | -0.3885822 | -2.8184610 | -0.5817413 |
| C  | -0.7417912 | -2.8843653 | -1.9340466 |
| C  | -0.4915460 | -4.1239553 | -2.6321920 |
| C  | -0.6351175 | -4.2569481 | -4.0464912 |
| C  | -0.0497981 | -5.2747183 | -1.8810137 |
| C  | 0.1598785  | -6.5134799 | -2.5591473 |
| C  | 0.2161537  | -5.1455139 | -0.4883563 |
| H  | 0.5707945  | -6.0253889 | 0.0701955  |
| C  | 0.1105321  | -3.9244849 | 0.1674587  |
| C  | -1.2364403 | 0.7166124  | -3.1976645 |
| C  | -2.3608306 | 0.5592096  | -4.0010937 |
| H  | -2.7462473 | 1.4263784  | -4.5575638 |
| C  | -3.0748241 | -0.6694716 | -4.0719901 |
| C  | -4.2908107 | -0.7704482 | -4.8128817 |
| C  | -2.6013853 | -1.8124076 | -3.3313984 |
| C  | -3.4166925 | -2.9828202 | -3.3033081 |
| C  | -1.3506285 | -1.7096816 | -2.6178538 |
| C  | -0.7369412 | -0.4552677 | -2.5502470 |
| O  | -0.5717242 | -1.6266732 | 0.1225821  |
| O  | 0.4579519  | -0.3277295 | -1.8296413 |
| P  | 0.3305145  | -0.2703926 | -0.2038923 |
| O  | 1.7370585  | -0.2641291 | 0.3686281  |
| O  | -0.6593984 | 0.8332268  | 0.2652105  |
| C  | -0.0197271 | -6.6151720 | -3.9302659 |
| C  | -0.4039736 | -5.4706718 | -4.6791824 |
| H  | 0.4858273  | -7.3852978 | -1.9703774 |
| H  | 0.1518331  | -7.5743532 | -4.4421066 |
| H  | -0.9229714 | -3.3790825 | -4.6410463 |
| H  | -0.5141444 | -5.5440889 | -5.7719070 |
| C  | -4.6070158 | -3.0421550 | -4.0142414 |
| C  | -5.0415855 | -1.9356898 | -4.7921707 |
| H  | -3.1031318 | -3.8408412 | -2.6936580 |
| H  | -5.2236033 | -3.9527411 | -3.9673380 |
| H  | -5.9831611 | -1.9987451 | -5.3587157 |

|   |            |            |            |   |            |            |            |
|---|------------|------------|------------|---|------------|------------|------------|
| H | -4.6329610 | 0.1072329  | -5.3835222 | H | 2.4372486  | 5.4054808  | -0.5887067 |
| C | 1.9638774  | -3.7183862 | 1.8510568  | H | -3.0125668 | 4.3174762  | -0.1338001 |
| C | 0.5687441  | -3.7329844 | 1.5778911  | H | 1.7774359  | 6.3552906  | -4.2529972 |
| C | 2.3828340  | -3.5459889 | 3.1849310  | H | 0.9722818  | 0.4106421  | -4.2278986 |
| C | -0.3747244 | -3.5544856 | 2.6279955  | H | -2.9530261 | 1.6755998  | -1.7309904 |
| C | 0.0990240  | -3.4054625 | 3.9431283  | H | 2.2436192  | 3.8654356  | -3.4705630 |
| C | 1.4749393  | -3.4066927 | 4.2465795  | C | 2.2986972  | 6.5832571  | 2.5099919  |
| H | 3.4607885  | -3.5189499 | 3.4078723  | C | 2.3362028  | 5.1956670  | 2.3463895  |
| C | -1.8761324 | -3.6199297 | 2.3466623  | C | 1.2128338  | 4.5233970  | 1.8095081  |
| H | -0.6295603 | -3.2890137 | 4.7603395  | C | 0.0541136  | 5.2497136  | 1.4524251  |
| C | -2.7120263 | -2.6328503 | 3.1746786  | C | 0.0207868  | 6.6402589  | 1.6213064  |
| H | -2.7076272 | -2.8794519 | 4.2566592  | C | 1.1439377  | 7.3051195  | 2.1445871  |
| H | -3.7664823 | -2.6404732 | 2.8336047  | H | 3.1708010  | 7.1143036  | 2.9204553  |
| H | -2.3374150 | -1.5925795 | 3.0767452  | H | 3.2238788  | 4.6043872  | 2.6182639  |
| C | -2.3870870 | -5.0630707 | 2.5222799  | C | 1.2268733  | 3.0698288  | 1.6178777  |
| H | -2.0327957 | -3.3497315 | 1.2821035  | H | -0.8121067 | 4.7135434  | 1.0364741  |
| H | -2.2526490 | -5.4031183 | 3.5706085  | H | -0.8778644 | 7.2097234  | 1.3403989  |
| H | -1.8335250 | -5.7653137 | 1.8664577  | H | 1.1212935  | 8.3985568  | 2.2711380  |
| H | -3.4657635 | -5.1355452 | 2.2714192  | O | 2.1887306  | 2.3503977  | 1.9249520  |
| C | 1.9795260  | -3.2665864 | 5.6791219  | H | 0.3132006  | 2.6153876  | 1.1568401  |
| C | 1.7714116  | -1.8444156 | 6.2306165  | C | 0.0642950  | 2.3777351  | 4.5488013  |
| H | 2.1792915  | -1.7599017 | 7.2594614  | C | -0.3899941 | 1.3581086  | 3.7458728  |
| H | 0.6916928  | -1.5868761 | 6.2786192  | C | -1.7082458 | 1.8245519  | 3.2637200  |
| H | 2.2871274  | -1.0969630 | 5.5939082  | O | -2.0093950 | 3.0409423  | 3.7404825  |
| C | 1.3657911  | -4.3258082 | 6.6111160  | C | -0.9348383 | 3.4766369  | 4.6004530  |
| H | 3.0765419  | -3.4437479 | 5.6441585  | O | -2.5421396 | 1.2480705  | 2.5332280  |
| H | 1.8121959  | -4.2623525 | 7.6250819  | C | 0.2051854  | 0.0773606  | 3.3728949  |
| H | 1.5330992  | -5.3516526 | 6.2245337  | H | -1.3627461 | 3.6642580  | 5.6101398  |
| H | 0.2704020  | -4.1829949 | 6.7232417  | H | -0.5608040 | 4.4486466  | 4.2057722  |
| C | 3.0138094  | -3.9293608 | 0.7590240  | H | -0.4987421 | -0.5596205 | 2.8058242  |
| C | 4.0724117  | -2.8161640 | 0.7119294  | H | 0.5294033  | -0.4941847 | 4.2622836  |
| H | 4.7846172  | -3.0051610 | -0.1181135 | H | 1.0241566  | 2.4040174  | 5.0826936  |
| H | 4.6578307  | -2.7497944 | 1.6509642  |   |            |            |            |
| H | 3.6020718  | -1.8282351 | 0.5483844  |   |            |            |            |
| C | 3.6683593  | -5.3170570 | 0.9033570  |   |            |            |            |
| H | 2.4900158  | -3.9130824 | -0.2178886 |   |            |            |            |
| H | 4.3893224  | -5.4989489 | 0.0793741  |   |            |            |            |
| H | 2.9142542  | -6.1303653 | 0.8857702  |   |            |            |            |
| H | 4.2229819  | -5.3976244 | 1.8617455  |   |            |            |            |
| H | 0.3809552  | 6.5356969  | -1.4991543 |   |            |            |            |
| H | 2.2735383  | 2.8006139  | -5.6819079 |   |            |            |            |
| H | -4.8847122 | 3.1778845  | -2.2040243 |   |            |            |            |
| C | 1.0731472  | 6.0187301  | -2.2001222 |   |            |            |            |
| H | 3.4335228  | 0.2921967  | -4.0659254 |   |            |            |            |
| H | 2.8073358  | 7.0082459  | -1.3004858 |   |            |            |            |
| H | -3.9145220 | 2.8123998  | 0.1759046  |   |            |            |            |
| C | 0.4970915  | 4.6284169  | -2.4387774 |   |            |            |            |
| C | 1.7112078  | 1.8443632  | -5.6374289 |   |            |            |            |
| C | 2.4587078  | 5.9814469  | -1.5347058 |   |            |            |            |
| H | 3.2183118  | 5.5173258  | -2.1974897 |   |            |            |            |
| C | 1.2242137  | 3.6377063  | -3.1210340 |   |            |            |            |
| C | -3.8714860 | 3.4252241  | -2.5826986 |   |            |            |            |
| H | 0.0947735  | 6.8966513  | -3.9661713 |   |            |            |            |
| C | -0.8023796 | 4.3061441  | -2.0131054 |   |            |            |            |
| C | 1.1029363  | 6.8298342  | -3.5095497 |   |            |            |            |
| H | 1.4706135  | 7.8615399  | -3.3296147 |   |            |            |            |
| H | -1.3839694 | 5.0752251  | -1.4791422 |   |            |            |            |
| C | 2.8830957  | 1.0780118  | -3.5087675 |   |            |            |            |
| H | 2.2757065  | 1.0941849  | -6.2290886 |   |            |            |            |
| H | 0.7320257  | 2.0067658  | -6.1323338 |   |            |            |            |
| C | 0.6908212  | 2.3635754  | -3.3873673 |   |            |            |            |
| C | -2.9670258 | 3.2133624  | -0.2395681 |   |            |            |            |
| C | -1.3813389 | 3.0430279  | -2.2383472 |   |            |            |            |
| H | -3.8094801 | 3.0870133  | -3.6353349 |   |            |            |            |
| H | -3.7655139 | 4.5305518  | -2.5814222 |   |            |            |            |
| C | 1.5306766  | 1.3672185  | -4.1837352 |   |            |            |            |
| C | -0.6276465 | 2.0610442  | -2.9471195 |   |            |            |            |
| C | -2.7884161 | 2.7728742  | -1.7034284 |   |            |            |            |
| H | 2.7424946  | 0.7263871  | -2.4681243 |   |            |            |            |
| H | -2.1299302 | 2.8581840  | 0.3926333  |   |            |            |            |
| H | 3.5298839  | 1.9798554  | -3.4844731 |   |            |            |            |

### int3

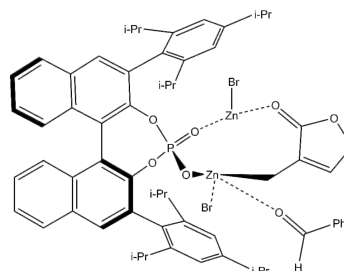

Energy (Hartree) = -11970.02621118

|    |            |            |            |
|----|------------|------------|------------|
| Zn | 2.0111096  | 0.2211315  | 2.3711927  |
| Br | 4.0905000  | -0.1037341 | 3.4130953  |
| Zn | -2.4147914 | 0.2223256  | 0.8413219  |
| Br | -4.2287432 | -0.7912275 | -0.0898728 |
| C  | -0.3922475 | -2.8135058 | -0.5834818 |
| C  | -0.7476462 | -2.8841871 | -1.9349058 |
| C  | -0.4950700 | -4.1246370 | -2.6301890 |
| C  | -0.6451354 | -4.2632478 | -4.0430258 |
| C  | -0.0440551 | -5.2706674 | -1.8774834 |
| C  | 0.1686872  | -6.5096755 | -2.5532069 |
| C  | 0.2262322  | -5.1359112 | -0.4863899 |
| H  | 0.5881835  | -6.0115287 | 0.0740954  |
| C  | 0.1150342  | -3.9145683 | 0.1674581  |
| C  | -1.2441754 | 0.7138729  | -3.2048242 |
| C  | -2.3690886 | 0.5547555  | -4.0067652 |
| H  | -2.7542528 | 1.4215562  | -4.5639664 |
| C  | -3.0836734 | -0.6735217 | -4.0747320 |
| C  | -4.3002305 | -0.7766972 | -4.8135210 |
| C  | -2.6096417 | -1.8147190 | -3.3319996 |
| C  | -3.4250035 | -2.9847519 | -3.3001893 |
| C  | -1.3580832 | -1.7111896 | -2.6203522 |
| C  | -0.7436024 | -0.4568623 | -2.5555615 |

|   |            |            |            |   |            |            |            |
|---|------------|------------|------------|---|------------|------------|------------|
| O | -0.5792941 | -1.6209176 | 0.1172134  | H | 1.4823560  | 7.8531275  | -3.3210899 |
| O | 0.4509769  | -0.3275447 | -1.8375224 | H | -1.3848374 | 5.0737184  | -1.4891186 |
| P | 0.3270912  | -0.2673047 | -0.2110227 | C | 2.8783297  | 1.0677557  | -3.5155146 |
| O | 1.7336092  | -0.2659703 | 0.3588004  | H | 2.2650343  | 1.0867610  | -6.2352022 |
| O | -0.6620993 | 0.8392366  | 0.2541014  | H | 0.7217042  | 1.9992951  | -6.1340303 |
| C | -0.0175428 | -6.6171400 | -3.9224674 | C | 0.6868079  | 2.3561957  | -3.3907886 |
| C | -0.4117916 | -5.4776369 | -4.6726646 | C | -2.9822163 | 3.2214024  | -0.2588325 |
| H | 0.5026768  | -7.3776089 | -1.9632440 | C | -1.3871394 | 3.0424558  | -2.2497686 |
| H | 0.1564829  | -7.5771453 | -4.4318196 | H | -3.8077626 | 3.0940825  | -3.6582604 |
| H | -0.9410823 | -3.3884394 | -4.6379146 | H | -3.7642527 | 4.5382215  | -2.6073759 |
| H | -0.5280144 | -5.5551733 | -5.7644296 | C | 1.5250771  | 1.3588408  | -4.1875056 |
| C | -4.6156495 | -3.0455517 | -4.0096781 | C | -0.6342715 | 2.0579969  | -2.9557076 |
| C | -5.0509051 | -1.9413198 | -4.7893395 | C | -2.7976403 | 2.7782648  | -1.7210143 |
| H | -3.1098749 | -3.8405170 | -2.6883607 | H | 2.7410933  | 0.7164040  | -2.4745729 |
| H | -5.2323823 | -3.9557368 | -3.9592967 | H | -2.1490111 | 2.8661120  | 0.3781894  |
| H | -5.9934014 | -2.0051214 | -5.3541128 | H | 3.5278246  | 1.9676759  | -3.4933183 |
| H | -4.6433583 | 0.0999688  | -5.3851075 | H | 2.4425433  | 5.3844131  | -0.5870880 |
| C | 1.9651620  | -3.6867237 | 1.8531836  | H | -3.0275459 | 4.3259592  | -0.1550890 |
| C | 0.5706985  | -3.7178707 | 1.5780327  | H | 1.7833589  | 6.3483444  | -4.2481078 |
| C | 2.3796850  | -3.5112997 | 3.1878482  | H | 0.9656090  | 0.4029178  | -4.2303507 |
| C | -0.3764850 | -3.5512223 | 2.6264226  | H | -2.9669141 | 1.6817448  | -1.7465521 |
| C | 0.0936126  | -3.4028130 | 3.9427101  | H | 2.2462100  | 3.8506441  | -3.4644382 |
| C | 1.4685783  | -3.3885892 | 4.2485324  | C | 2.2926874  | 6.5583478  | 2.5391453  |
| H | 3.4565399  | -3.4670629 | 3.4122072  | C | 2.3285726  | 5.1730395  | 2.3563977  |
| C | -1.8769563 | -3.6245355 | 2.3418626  | C | 1.2058967  | 4.5097064  | 1.8088885  |
| H | -0.6377107 | -3.2973086 | 4.7590291  | C | 0.0490437  | 5.2412041  | 1.4599509  |
| C | -2.7187125 | -2.6394855 | 3.1665184  | C | 0.0175781  | 6.6296918  | 1.6478334  |
| H | -2.7209447 | -2.8879992 | 4.2481445  | H | 1.1398278  | 7.2865515  | 2.1818550  |
| H | -3.7708749 | -2.6457137 | 2.8186733  | C | 3.1649538  | 7.0827143  | 2.9579863  |
| H | -2.3436239 | -1.5989733 | 3.0730247  | H | 3.2130681  | 4.5730395  | 2.6201966  |
| C | -2.3826159 | -5.0692766 | 2.5173496  | C | 1.2228590  | 3.0554235  | 1.5998671  |
| H | -2.0332062 | -3.3554463 | 1.2769910  | H | -0.8164474 | 4.7107247  | 1.0351934  |
| H | -2.2462151 | -5.4098000 | 3.5651660  | H | -0.8800295 | 7.2037732  | 1.3726126  |
| H | -1.8264033 | -5.7691731 | 1.8615114  | H | 1.1181646  | 8.3782673  | 2.3229755  |
| H | -3.4609532 | -5.1463872 | 2.2666441  | O | 2.1863715  | 2.3397663  | 1.9008762  |
| C | 1.9687214  | -3.2474848 | 5.6825182  | H | 0.3100775  | 2.6036867  | 1.1337447  |
| C | 1.7417770  | -1.8305953 | 6.2399655  | C | 0.1049905  | 2.3406138  | 4.5590229  |
| H | 2.1391017  | -1.7480721 | 7.2730832  | C | -0.3654209 | 1.3386740  | 3.7418354  |
| H | 0.6592504  | -1.5833046 | 6.2797469  | C | -1.6740272 | 1.8355865  | 3.2590032  |
| H | 2.2591595  | -1.0757372 | 5.6133372  | O | -1.9531214 | 3.0543912  | 3.7494857  |
| C | 1.3681568  | -4.3199803 | 6.6076550  | C | -0.8734513 | 3.4592623  | 4.6156108  |
| H | 3.0681052  | -3.4087515 | 5.6483469  | O | -2.5143031 | 1.2844827  | 2.5206159  |
| H | 1.8125025  | -4.2575529 | 7.6225490  | C | 0.2064501  | 0.0573238  | 3.3503506  |
| H | 1.5477547  | -5.3411708 | 6.2148185  | H | -1.3033591 | 3.6491968  | 5.6248946  |
| H | 0.2709659  | -4.1924973 | 6.7204680  | H | -0.4780297 | 4.4265749  | 4.2287989  |
| C | 3.0189883  | -3.8874426 | 0.7628968  | H | -0.5049712 | -0.5635142 | 2.7755371  |
| C | 4.0817100  | -2.7777463 | 0.7289563  | H | 0.5382351  | -0.5300929 | 4.2260645  |
| H | 4.7995415  | -2.9660435 | -0.0961735 | H | 1.0665879  | 2.3398651  | 5.0903260  |
| H | 4.6612005  | -2.7148022 | 1.6716984  |   |            |            |            |
| H | 3.6186443  | -1.7870273 | 0.5633770  |   |            |            |            |
| C | 3.6700199  | -5.2778027 | 0.8990989  |   |            |            |            |
| H | 2.4985198  | -3.8621736 | -0.2158403 |   |            |            |            |
| H | 4.3936708  | -5.4555782 | 0.0766828  |   |            |            |            |
| H | 2.9152387  | -6.0901645 | 0.8742088  |   |            |            |            |
| H | 4.2207607  | -5.3662194 | 1.8588332  |   |            |            |            |
| H | 0.3887480  | 6.5245389  | -1.4932492 |   |            |            |            |
| H | 2.2636177  | 2.7926073  | -5.6878987 |   |            |            |            |
| H | -4.8901145 | 3.1896500  | -2.2332860 |   |            |            |            |
| C | 1.0794887  | 6.0076306  | -2.1961253 |   |            |            |            |
| H | 3.4261513  | 0.2808083  | -4.0733797 |   |            |            |            |
| H | 2.8163488  | 6.9896342  | -1.2919070 |   |            |            |            |
| H | -3.9310449 | 2.8209807  | 0.1536990  |   |            |            |            |
| C | 0.4988756  | 4.6199947  | -2.4394079 |   |            |            |            |
| C | 1.7018014  | 1.8362144  | -5.6415359 |   |            |            |            |
| C | 2.4645222  | 5.9648646  | -1.5301616 |   |            |            |            |
| H | 3.2236430  | 5.5016767  | -2.1939372 |   |            |            |            |
| C | 1.2241683  | 3.6274059  | -3.1200279 |   |            |            |            |
| C | -3.8739987 | 3.4332630  | -2.6063033 |   |            |            |            |
| H | 0.1036821  | 6.8931731  | -3.9594775 |   |            |            |            |
| C | -0.8037183 | 4.3025913  | -2.0208439 |   |            |            |            |
| C | 1.1113233  | 6.8229397  | -3.5027195 |   |            |            |            |

## 7.10.2 Pathway 14d-ma ↔ 14j-mi

### TS1; COSMO

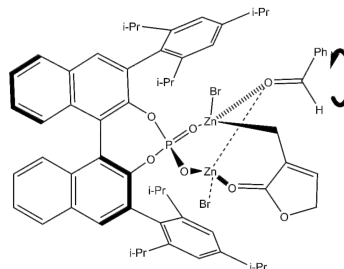

Energy (Hartree) = -11970.03750792

|   |           |           |           |
|---|-----------|-----------|-----------|
| C | 1.2558392 | 2.1515974 | 1.5373268 |
| C | 2.6554523 | 2.1342792 | 1.4840162 |
| C | 3.3473089 | 3.4007281 | 1.4390376 |
| C | 4.7494049 | 3.5093300 | 1.1925631 |



|   |            |            |            |    |            |            |            |
|---|------------|------------|------------|----|------------|------------|------------|
| C | 2.5910792  | 4.6167270  | 1.6180761  | C  | 1.6205479  | -5.8347774 | -2.8182133 |
| C | 3.2733518  | 5.8709923  | 1.6170972  | H  | 3.2004585  | 0.3308573  | -3.9789524 |
| C | 1.1744998  | 4.5503488  | 1.7426705  | H  | -0.1046681 | -6.3200832 | -4.0942646 |
| H | 0.6090474  | 5.4868199  | 1.8676075  | H  | 0.8684934  | -4.0710757 | 3.2783527  |
| C | 0.4807119  | 3.3484274  | 1.6465285  | C  | 2.1374472  | -4.6690026 | -1.9847910 |
| C | 3.6729116  | -1.4288032 | 0.4554790  | C  | 5.0593093  | -1.6335197 | -3.2906436 |
| C | 4.7715596  | -1.6426961 | 1.2811314  | C  | 0.2989971  | -5.4640540 | -3.5134541 |
| H | 5.3157348  | -2.5968735 | 1.2102885  | H  | 0.4554987  | -4.6204074 | -4.2202631 |
| C | 5.1659880  | -0.7002920 | 2.2722952  | C  | 2.6674019  | -3.5122956 | -2.5841823 |
| C | 6.2356862  | -0.9855763 | 3.1741105  | C  | 3.3531214  | -4.8512189 | 2.3072101  |
| C | 4.4318202  | 0.5346031  | 2.4132421  | H  | 3.6080387  | -6.6324834 | -3.3168159 |
| C | 4.7592676  | 1.3893420  | 3.5093869  | C  | 2.0704358  | -4.7090556 | -0.5839513 |
| C | 3.3828095  | 0.8343412  | 1.4663679  | C  | 2.6637366  | -6.3492452 | -3.8241979 |
| C | 3.0277370  | -0.1579643 | 0.5448763  | H  | 2.2824624  | -7.2397207 | -4.3656440 |
| O | 0.5631769  | 0.9427260  | 1.5325350  | H  | 1.6221707  | -5.5939689 | -0.1043712 |
| O | 2.0161058  | 0.1032015  | -0.3747106 | C  | 2.7558381  | -0.5683113 | -3.5047683 |
| P | 0.4517479  | 0.1122025  | 0.1169536  | H  | 5.7998380  | -2.0740481 | -2.5922157 |
| O | -0.2913745 | 0.9542860  | -0.9296940 | H  | 5.5245005  | -0.7488055 | -3.7729191 |
| O | -0.0682843 | -1.2845264 | 0.4520417  | C  | 3.1603256  | -2.4348810 | -1.8257996 |
| C | 4.6424804  | 5.9377072  | 1.4073319  | C  | 0.9442843  | -4.0599893 | 2.1709588  |
| C | 5.3803441  | 4.7458136  | 1.1757099  | C  | 2.5399796  | -3.6578900 | 0.2244198  |
| H | 2.6841221  | 6.7893091  | 1.7677820  | H  | 3.2722649  | -4.9068482 | 3.4127945  |
| H | 5.1555387  | 6.9114710  | 1.4009401  | H  | 3.1143921  | -5.8565476 | 1.9008281  |
| H | 5.3318601  | 2.5972417  | 1.0028548  | C  | 3.7655327  | -1.2365097 | -2.5546398 |
| H | 6.4611611  | 4.8022817  | 0.9750301  | C  | 3.1200265  | -2.5192069 | -0.4066821 |
| C | 5.7917349  | 1.0735541  | 4.3823052  | C  | 2.3963976  | -3.7843825 | 1.7424531  |
| C | 6.5513142  | -0.1139684 | 4.2054012  | H  | 1.8429753  | -0.2451779 | -2.9681503 |
| H | 4.1761182  | 2.3067230  | 3.6674757  | H  | 0.2663194  | -3.2799591 | 1.7778121  |
| H | 6.0186195  | 1.7476961  | 5.2223869  | H  | 2.4439197  | -1.2509513 | -4.3225168 |
| H | 7.3736844  | -0.3489153 | 4.8982441  | H  | -0.4625593 | -5.1578017 | -2.7675207 |
| H | 6.7935387  | -1.9263597 | 3.0446172  | H  | 0.5769176  | -5.0389773 | 1.8008733  |
| C | -1.6927647 | 3.8708333  | 0.4705231  | H  | 2.9090995  | -5.5795711 | -4.5856057 |
| C | -1.0134751 | 3.3026531  | 1.5903041  | H  | 4.0488028  | -0.4831423 | -1.7923806 |
| C | -3.0952202 | 3.7888489  | 0.4233344  | H  | 2.6808803  | -2.8116136 | 2.1906863  |
| C | -1.7606447 | 2.6879108  | 2.6312734  | H  | 2.7168457  | -3.4491596 | -3.6832552 |
| C | -3.1660352 | 2.6588673  | 2.5424040  | Zn | -1.5610066 | 0.7159319  | -2.3744648 |
| C | -3.8581728 | 3.1977385  | 1.4465656  | Br | -0.9955787 | 0.9157043  | -4.6169624 |
| C | -1.0957473 | 2.1001400  | 3.8752267  | Zn | -1.9799665 | -1.8960821 | 0.1410183  |
| H | -3.7299923 | 2.1887424  | 3.3610701  | Br | -2.1018646 | -4.1996853 | -0.3698800 |
| C | -1.4331727 | 0.6109562  | 4.0699838  | H  | -3.6197165 | 4.2059280  | -0.4520925 |
| H | -2.5200071 | 0.4558018  | 4.2357039  | C  | -5.4974259 | -2.9848016 | -4.3040696 |
| H | -0.9022932 | 0.2060152  | 4.9561935  | C  | -4.4596343 | -2.3965671 | -3.5806671 |
| H | -1.1276778 | 0.0164480  | 3.1873976  | C  | -3.1371049 | -2.8882976 | -3.7146680 |
| C | -1.4450818 | 2.9282011  | 5.1265537  | C  | -2.8716438 | -3.9696715 | -4.5886709 |
| H | 0.0022206  | 2.1722652  | 3.7406374  | C  | -3.9162713 | -4.5568414 | -5.3107129 |
| H | -2.5331966 | 2.8941664  | 5.3447817  | C  | -5.2266737 | -4.0669887 | -5.1666402 |
| H | -1.1622513 | 3.9925291  | 4.9955196  | H  | -6.5255320 | -2.6048988 | -4.2059859 |
| H | -0.9115456 | 2.5372285  | 6.0176848  | C  | -2.0453546 | -2.2736170 | -2.9782199 |
| C | -5.3818476 | 3.2001148  | 1.3424122  | H  | -1.8425546 | -4.3422775 | -4.6938434 |
| C | -6.0816821 | 2.2356138  | 2.3071940  | H  | -3.7127310 | -5.3980584 | -5.9896362 |
| H | -7.1707813 | 2.2044569  | 2.0999731  | H  | -6.0482519 | -4.5300069 | -5.7346920 |
| H | -5.9601130 | 2.5568938  | 3.3627376  | O  | -2.2107308 | -1.2886094 | -2.2157070 |
| H | -5.6856035 | 1.2046684  | 2.2169862  | H  | -4.6429894 | -1.5490719 | -2.9063738 |
| C | -5.9322277 | 4.6309464  | 1.5134604  | H  | -1.0199057 | -2.6870672 | -3.1331473 |
| H | -5.6263845 | 2.8781996  | 0.3033991  | C  | -5.6705314 | -0.5776158 | 0.0423483  |
| H | -7.0324787 | 4.6539582  | 1.3697155  | C  | -4.3732768 | -0.1557048 | -0.0703593 |
| H | -5.4772109 | 5.3340129  | 0.7876186  | C  | -4.3468870 | 0.7036700  | -1.2759084 |
| H | -5.7111628 | 5.0109896  | 2.5329142  | O  | -5.5758182 | 0.8085852  | -1.8220054 |
| C | -0.9720981 | 4.6098653  | -0.6600959 | C  | -6.4963549 | 0.0177851  | -1.0435607 |
| C | -1.2150865 | 3.9937386  | -2.0483441 | O  | -3.4006498 | 1.3123812  | -1.8029685 |
| H | -0.8030043 | 4.6450099  | -2.8458219 | C  | -3.1825349 | -0.3949401 | 0.7469885  |
| H | -2.2909552 | 3.8375193  | -2.2666047 | H  | -6.9691778 | -0.7225519 | -1.7277405 |
| H | -0.6893249 | 3.0233450  | -2.1349109 | H  | -7.3019687 | 0.6903430  | -0.6724233 |
| C | -1.3433299 | 6.1060869  | -0.6417626 | H  | -3.4584045 | -0.6364581 | 1.7925777  |
| H | 0.1172221  | 4.5420559  | -0.4739297 | H  | -2.5424299 | 0.5100728  | 0.7587566  |
| H | -0.7536753 | 6.6653967  | -1.3972011 | H  | -6.0829441 | -1.2287411 | 0.8246965  |
| H | -1.1492309 | 6.5602147  | 0.3517013  |    |            |            |            |
| H | -2.4183192 | 6.2604082  | -0.8722403 |    |            |            |            |
| H | 1.3989782  | -6.6622766 | -2.1091256 |    |            |            |            |
| H | 4.8597410  | -2.3830592 | -4.0850984 |    |            |            |            |
| H | 4.4099323  | -4.6322495 | 2.0523548  |    |            |            |            |

TS1

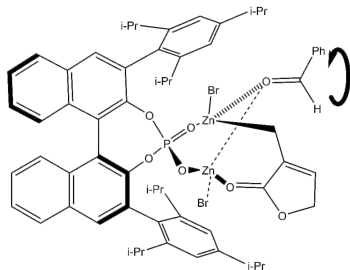

Energy (Hartree) = -11970.02370659  
 number of imaginary frequencies: 1

|   |            |            |            |
|---|------------|------------|------------|
| C | 1.2531078  | 2.1502072  | 1.5425795  |
| C | 2.6527374  | 2.1328051  | 1.4913091  |
| C | 3.3448635  | 3.3990517  | 1.4488142  |
| C | 4.7475966  | 3.5073273  | 1.2072771  |
| C | 2.5887764  | 4.6152871  | 1.6252755  |
| C | 3.2718415  | 5.8685660  | 1.6266597  |
| C | 1.1720688  | 4.5490836  | 1.7444711  |
| H | 0.6054406  | 5.4853224  | 1.8654760  |
| C | 0.4783058  | 3.3475319  | 1.6478038  |
| C | 3.6671270  | -1.4270953 | 0.4510244  |
| C | 4.7665230  | -1.6435353 | 1.2745754  |
| H | 5.3091154  | -2.5981701 | 1.1988620  |
| C | 5.1621900  | -0.7054551 | 2.2689768  |
| C | 6.2320876  | -0.9934151 | 3.1688993  |
| C | 4.4284961  | 0.5288935  | 2.4149576  |
| C | 4.7573680  | 1.3797212  | 3.5133709  |
| C | 3.3792058  | 0.8325171  | 1.4699146  |
| C | 3.0230482  | -0.1559762 | 0.5446050  |
| O | 0.5598338  | 0.9421162  | 1.5365425  |
| O | 2.0120378  | 0.1085007  | -0.3735741 |
| P | 0.4484582  | 0.1149755  | 0.1180089  |
| O | -0.3018960 | 0.9566836  | -0.9225436 |
| O | -0.0667666 | -1.2844855 | 0.4509961  |
| C | 4.6412388  | 5.9349080  | 1.4223557  |
| C | 5.3789586  | 4.7431047  | 1.1934729  |
| H | 2.6821870  | 6.7870130  | 1.7748152  |
| H | 5.1545627  | 6.9084854  | 1.4180302  |
| H | 5.3293130  | 2.5944898  | 1.0197861  |
| H | 6.4605273  | 4.7988158  | 0.9970132  |
| C | 5.7905105  | 1.0609745  | 4.3836962  |
| C | 6.5490904  | -0.1258048 | 4.2024212  |
| H | 4.1743541  | 2.2966866  | 3.6738095  |
| H | 6.0185462  | 1.7325734  | 5.2254367  |
| H | 7.3719500  | -0.3635768 | 4.8936334  |
| H | 6.7890418  | -1.9342168 | 3.0359015  |
| C | -1.6895119 | 3.8647642  | 0.4599854  |
| C | -1.0156073 | 3.3023082  | 1.5855894  |
| C | -3.0916531 | 3.7855290  | 0.4087817  |
| C | -1.7670455 | 2.6926676  | 2.6260252  |
| C | -3.1720200 | 2.6657164  | 2.5325112  |
| C | -3.8591188 | 3.2023734  | 1.4328069  |
| C | -1.1067529 | 2.1107322  | 3.8751450  |
| H | -3.7393400 | 2.2012770  | 3.3521209  |
| C | -1.4409609 | 0.6215103  | 4.0739559  |
| H | -2.5273719 | 0.4640631  | 4.2408566  |
| H | -0.9093025 | 0.2194476  | 4.9608319  |
| H | -1.1334588 | 0.0247491  | 3.1938059  |
| C | -1.4631144 | 2.9429209  | 5.1214726  |
| H | -0.0084435 | 2.1846488  | 3.7444352  |
| H | -2.5522051 | 2.9098652  | 5.3344363  |
| H | -1.1807165 | 4.0068640  | 4.9881368  |
| H | -0.9346071 | 2.5558282  | 6.0172066  |
| C | -5.3826948 | 3.2153887  | 1.3266935  |
| C | -6.0906948 | 2.2567309  | 2.2914693  |
| H | -7.1805402 | 2.2347503  | 2.0860744  |

|    |            |            |            |
|----|------------|------------|------------|
| H  | -5.9670471 | 2.5773925  | 3.3468437  |
| H  | -5.7027954 | 1.2226428  | 2.2020509  |
| C  | -5.9223681 | 4.6501556  | 1.4977320  |
| H  | -5.6289227 | 2.8946659  | 0.2875252  |
| H  | -7.0223063 | 4.6835378  | 1.3531529  |
| H  | -5.4601054 | 5.3500942  | 0.7737523  |
| H  | -5.6984714 | 5.0281692  | 2.5170841  |
| C  | -0.9627054 | 4.5977444  | -0.6706766 |
| C  | -1.2170965 | 3.9925790  | -2.0612998 |
| H  | -0.7855943 | 4.6349296  | -2.8555205 |
| H  | -2.2950851 | 3.8629550  | -2.2859581 |
| H  | -0.7140528 | 3.0105868  | -2.1510464 |
| C  | -1.3154312 | 6.0983297  | -0.6437672 |
| H  | 0.1261457  | 4.5144234  | -0.4875337 |
| H  | -0.7261533 | 6.6543141  | -1.4018876 |
| H  | -1.1091597 | 6.5469555  | 0.3495995  |
| H  | -2.3904497 | 6.2663524  | -0.8639424 |
| H  | 1.3715254  | -6.6444130 | -2.1236459 |
| H  | 4.8557677  | -2.3757825 | -4.0957076 |
| H  | 4.3971666  | -4.6114430 | 2.044610   |
| C  | 1.6125287  | -5.8226221 | -2.8329957 |
| H  | 3.2097620  | 0.3439634  | -3.9763862 |
| H  | -0.0991724 | -6.3036254 | -4.1286577 |
| H  | 0.8508406  | -4.0712758 | 3.2676513  |
| C  | 2.1266644  | -4.6579273 | -1.9962953 |
| C  | 5.0600010  | -1.6320946 | -3.2970845 |
| C  | 0.3058350  | -5.4453679 | -3.5518191 |
| H  | 0.4826584  | -4.6115719 | -4.2658578 |
| C  | 2.6649306  | -3.5040316 | -2.5929078 |
| C  | 3.3415840  | -4.8372549 | 2.2976553  |
| H  | 3.6035385  | -6.6332879 | -3.2924345 |
| C  | 2.0520016  | -4.6979644 | -0.5962050 |
| C  | 2.6691258  | -6.3505803 | -3.8175676 |
| H  | 2.2936784  | -7.2435436 | -4.3590954 |
| H  | 1.5958160  | -5.5799238 | -0.1190400 |
| C  | 2.7617574  | -0.5535836 | -3.5027948 |
| H  | 5.7984740  | -2.0818032 | -2.6026028 |
| H  | 5.5302336  | -0.7479600 | -3.7753347 |
| C  | 3.1590549  | -2.4289566 | -1.8324113 |
| C  | 0.9280365  | -4.0651719 | 2.1604824  |
| C  | 2.5238177  | -3.6500255 | 0.2144163  |
| H  | 3.2598303  | -4.8948550 | 3.4029885  |
| H  | 3.1112250  | -5.8437352 | 1.8896801  |
| C  | 3.7696281  | -1.2312116 | -2.5576163 |
| C  | 3.1125660  | -2.5144868 | -0.4139157 |
| C  | 2.3776196  | -3.7773321 | 1.7322044  |
| H  | 1.8527602  | -0.2245476 | -2.9637883 |
| H  | 0.2426523  | -3.2937106 | 1.7640159  |
| H  | 2.4422251  | -1.2309038 | -4.3219814 |
| H  | -0.4626363 | -5.1235962 | -2.8198048 |
| H  | 0.5685181  | -5.0489435 | 1.7958802  |
| H  | 2.9318212  | -5.5880253 | -4.5802402 |
| H  | 4.0578857  | -0.4826684 | -1.7923257 |
| H  | 2.6542737  | -2.8023623 | 2.1807808  |
| H  | 2.7205353  | -3.4405456 | -3.6917220 |
| Zn | -1.5500221 | 0.7167766  | -2.3875154 |
| Br | -0.9931671 | 0.8617939  | -4.6258245 |
| Zn | -1.9676358 | -1.9125963 | 0.1235843  |
| Br | -2.0851155 | -4.2047656 | -0.4144302 |
| H  | -3.6122034 | 4.1990967  | -0.4706456 |
| C  | -5.5012996 | -3.0583779 | -4.2329431 |
| C  | -4.4665621 | -2.4602544 | -3.5131678 |
| C  | -3.1331675 | -2.9011107 | -3.6951147 |
| C  | -2.8536460 | -3.9420892 | -4.6108943 |
| C  | -3.8949095 | -4.5378046 | -5.3307927 |
| C  | -5.2165611 | -4.0984303 | -5.1404249 |
| H  | -6.5390655 | -2.7183788 | -4.0962258 |
| C  | -2.0435029 | -2.2678640 | -2.9666712 |
| H  | -1.8157110 | -4.2773261 | -4.7491315 |
| H  | -3.6795002 | -5.3476473 | -6.0434890 |
| H  | -6.0356643 | -4.5688047 | -5.7061263 |



|   |            |            |            |
|---|------------|------------|------------|
| O | -2.2221595 | -1.2903366 | -2.1985507 |
| H | -4.6589253 | -1.6461211 | -2.8011755 |
| H | -1.0102657 | -2.6509231 | -3.1453044 |
| C | -5.6595474 | -0.5914633 | 0.0685350  |
| C | -4.3614058 | -0.1728954 | -0.0451558 |
| C | -4.3352584 | 0.6963725  | -1.2480276 |
| O | -5.5699949 | 0.8104717  | -1.7851516 |
| C | -6.4875125 | 0.0196410  | -1.0088043 |
| O | -3.3907807 | 1.3000740  | -1.7758539 |
| C | -3.1703108 | -0.4202844 | 0.7652584  |
| H | -6.9699514 | -0.7115800 | -1.6972175 |
| H | -7.2866469 | 0.6942205  | -0.6254822 |
| H | -3.4404962 | -0.6739655 | 1.8093240  |
| H | -2.5269460 | 0.4821290  | 0.7809251  |
| H | -6.0691689 | -1.2472062 | 0.8483832  |

## TS2; COSMO

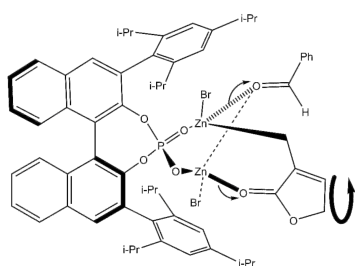

Energy (Hartree) = -11970.0141118

|   |            |            |            |
|---|------------|------------|------------|
| C | 1.0316412  | 2.2956734  | 1.6005575  |
| C | 2.3976581  | 2.1952781  | 1.3339393  |
| C | 3.1273308  | 3.4277895  | 1.1503017  |
| C | 4.4839281  | 3.4647175  | 0.7094014  |
| C | 2.4487335  | 4.6817085  | 1.3877500  |
| C | 3.1716707  | 5.9022474  | 1.2296062  |
| C | 1.0691064  | 4.6902510  | 1.7531189  |
| H | 0.5821427  | 5.6552487  | 1.9588254  |
| C | 0.3284716  | 3.5180987  | 1.8293213  |
| C | 3.1449248  | -1.4059487 | 0.1822684  |
| C | 4.3120809  | -1.6799486 | 0.8835644  |
| H | 4.8368466  | -2.6314728 | 0.7077633  |
| C | 4.8388131  | -0.7676801 | 1.8432446  |
| C | 5.9899593  | -1.1007104 | 2.6187920  |
| C | 4.1879176  | 0.5042722  | 2.0547647  |
| C | 4.6914314  | 1.3548356  | 3.0851864  |
| C | 3.0399362  | 0.8499970  | 1.2482883  |
| C | 2.5266348  | -0.1393276 | 0.4002836  |
| O | 0.2851294  | 1.1267085  | 1.7050673  |
| O | 1.3949122  | 0.1170302  | -0.3635516 |
| P | -0.0818092 | 0.3387128  | 0.3218668  |
| O | -0.7715572 | 1.3023527  | -0.6850849 |
| O | -0.8103283 | -0.9254710 | 0.7583531  |
| C | 4.4978846  | 5.9012527  | 0.8228933  |
| C | 5.1521948  | 4.6711303  | 0.5478111  |
| H | 2.6473484  | 6.8510265  | 1.4243612  |
| H | 5.0396964  | 6.8512764  | 0.6990867  |
| H | 4.9992626  | 2.5199747  | 0.4863722  |
| H | 6.1962132  | 4.6729438  | 0.1990213  |
| C | 5.8021060  | 0.9928150  | 3.8352733  |
| C | 6.4691852  | -0.2375174 | 3.5926407  |
| H | 4.1803152  | 2.3048298  | 3.2933490  |
| H | 6.1638506  | 1.6635329  | 4.6295449  |
| H | 7.3534115  | -0.5101371 | 4.1886161  |
| H | 6.4820406  | -2.0692052 | 2.4375114  |
| C | -2.1051132 | 3.8342598  | 1.1755269  |
| C | -1.1354210 | 3.4361828  | 2.1390344  |

|   |            |            |            |
|---|------------|------------|------------|
| C | -3.4667526 | 3.6180659  | 1.4625994  |
| C | -1.5521733 | 2.8319801  | 3.3597454  |
| C | -2.9239064 | 2.6191429  | 3.5832532  |
| C | -3.9000544 | 2.9914534  | 2.6434171  |
| C | -0.5600878 | 2.4218295  | 4.4472639  |
| H | -3.2360068 | 2.1322184  | 4.5199403  |
| C | -0.6962288 | 0.9418334  | 4.8437463  |
| H | -1.6762493 | 0.7260439  | 5.3168756  |
| H | 0.0924418  | 0.6633099  | 5.5728939  |
| H | -0.6033073 | 0.2779139  | 3.9628823  |
| C | -0.6874233 | 3.3512914  | 5.6696619  |
| H | 0.4641462  | 2.5625303  | 4.0456851  |
| H | -1.6915260 | 3.2653750  | 6.1354175  |
| H | -0.5380654 | 4.4133191  | 5.3866649  |
| H | 0.0658547  | 3.0906125  | 6.4419339  |
| C | -5.3818188 | 2.7312007  | 2.8873346  |
| C | -5.6600559 | 1.3039847  | 3.3891547  |
| H | -6.7516671 | 1.1088031  | 3.4262113  |
| H | -5.2638647 | 1.1423797  | 4.4128486  |
| H | -5.1899563 | 0.5369375  | 2.7413890  |
| C | -5.9733430 | 3.7841412  | 3.8440641  |
| H | -5.8910680 | 2.8494017  | 1.9045743  |
| H | -7.0630090 | 3.6271040  | 3.9856514  |
| H | -5.8190413 | 4.8120876  | 3.4582690  |
| H | -5.4891629 | 3.7229247  | 4.8414839  |
| C | -1.7105073 | 4.4667620  | -0.1586330 |
| C | -2.5567237 | 3.9706090  | -1.3436195 |
| H | -2.1090186 | 4.3002087  | -2.3028687 |
| H | -3.5932143 | 4.3662118  | -1.3132977 |
| H | -2.6187766 | 2.8654787  | -1.3583973 |
| C | -1.7632856 | 6.0051664  | -0.0765352 |
| H | -0.6608537 | 4.1692527  | -0.3614735 |
| H | -1.4387457 | 6.4631671  | -1.0340023 |
| H | -1.1141555 | 6.4009208  | 0.7293359  |
| H | -2.7980637 | 6.3494966  | 0.1326816  |
| H | 0.1520568  | -5.6339058 | -3.4121786 |
| H | 4.6280058  | -1.9665006 | -4.4102444 |
| H | 3.3727026  | -4.1778776 | 1.7939036  |
| C | 1.2200076  | -5.4114143 | -3.6390958 |
| H | 3.1856175  | 0.8183061  | -3.9213680 |
| H | 0.8896080  | -5.8616084 | -5.7475301 |
| H | -0.3972477 | -3.9619138 | 2.3491636  |
| C | 1.6411953  | -4.2941000 | -2.6886029 |
| C | 4.8647017  | -1.3772252 | -3.4998376 |
| C | 1.3116140  | -5.0471797 | -5.1250957 |
| H | 2.3655499  | -4.9035113 | -5.4432929 |
| C | 2.3793237  | -3.1745795 | -3.1043965 |
| C | 2.3273165  | -4.5417257 | 1.8403275  |
| H | 1.9314279  | -7.0047108 | -2.2852943 |
| C | 1.3144575  | -4.3892415 | -1.3196646 |
| C | 2.0273610  | -6.6926930 | -3.3444735 |
| H | 1.6830252  | -7.5328235 | -3.9824739 |
| H | 0.6946987  | -5.2359303 | -0.9829761 |
| C | 2.6643311  | -0.1006357 | -3.5837517 |
| H | 5.5418433  | -1.9886206 | -2.8695506 |
| H | 5.4197382  | -0.4731282 | -3.8246257 |
| C | 2.8410992  | -2.2030759 | -2.1937760 |
| C | -0.0965984 | -4.0597856 | 1.2869486  |
| C | 1.7529031  | -3.4494385 | -0.3703382 |
| H | 2.0442950  | -4.6305827 | 2.9095055  |
| H | 2.3039706  | -5.5587668 | 1.3949705  |
| C | 3.5921030  | -0.9854529 | -2.7288521 |
| C | 2.5683136  | -2.3696885 | -0.8115343 |
| C | 1.3584634  | -3.6009795 | 1.0984606  |
| H | 1.7733248  | 0.2082812  | -3.0021435 |
| H | -0.7924889 | -3.4305910 | 0.6998177  |
| H | 2.3051054  | -0.6378105 | -4.4863922 |
| H | 0.7541892  | -4.1197329 | -5.3610105 |
| H | -0.2407286 | -5.1214980 | 0.9961776  |
| H | 3.1059158  | -6.5266951 | -3.5488922 |
| H | 3.9147692  | -0.3779828 | -1.8585366 |

|    |            |            |            |
|----|------------|------------|------------|
| H  | 1.4412100  | -2.5953616 | 1.5618022  |
| H  | 2.6096855  | -3.0448901 | -4.1719012 |
| Zn | -0.8630094 | 0.8629762  | -2.5440437 |
| Br | -1.0692004 | 1.9450886  | -4.5328166 |
| Zn | -2.7740057 | -0.7338099 | 1.3972092  |
| Br | -3.0459390 | -1.9768581 | 3.3425612  |
| H  | -4.2235959 | 3.9125030  | 0.7183984  |
| C  | -1.3485190 | -2.2949219 | -6.3590431 |
| C  | -1.0045302 | -1.8563352 | -5.0772388 |
| C  | -1.3337088 | -2.6497417 | -3.9528685 |
| C  | -2.0118113 | -3.8786811 | -4.1249729 |
| C  | -2.3587694 | -4.3097255 | -5.4096497 |
| C  | -2.0246269 | -3.5196181 | -6.5248445 |
| H  | -1.0918192 | -1.6820983 | -7.2359417 |
| C  | -1.0003763 | -2.2191932 | -2.6023718 |
| H  | -2.2814300 | -4.4747701 | -3.2399226 |
| H  | -2.8929127 | -5.2614597 | -5.5476194 |
| H  | -2.2943261 | -3.8612393 | -7.5361065 |
| O  | -0.5480132 | -1.0973112 | -2.2982792 |
| H  | -0.4807419 | -0.8996355 | -4.9339735 |
| H  | -1.1318111 | -2.9597700 | -1.7801956 |
| C  | -6.2249627 | -0.8518033 | -0.0784251 |
| C  | -4.9329008 | -0.6406436 | -0.4558507 |
| C  | -4.6492530 | -1.6129016 | -1.5513592 |
| O  | -5.7637546 | -2.3691189 | -1.7909629 |
| C  | -6.8099580 | -1.9588051 | -0.8963852 |
| O  | -3.6176157 | -1.7681159 | -2.1884864 |
| C  | -3.8688622 | 0.2458980  | 0.0322425  |
| H  | -7.1194538 | -2.8397249 | -0.2885838 |
| H  | -7.6914078 | -1.6493935 | -1.5027259 |
| H  | -4.2459035 | 1.1769533  | 0.4938364  |
| H  | -3.1609124 | 0.5004787  | -0.7798654 |
| H  | -6.7783112 | -0.3271087 | 0.7126797  |

## TS2

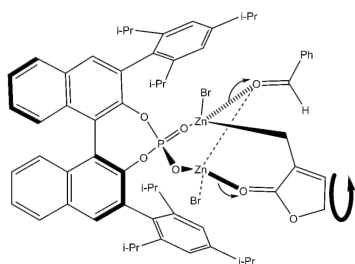

Energy (Hartree) = -11970.00194125  
number of imaginary frequencies: 1

|   |           |            |            |
|---|-----------|------------|------------|
| C | 1.0310921 | 2.3005863  | 1.5960533  |
| C | 2.3965862 | 2.1990386  | 1.3275803  |
| C | 3.1270780 | 3.4305682  | 1.1426324  |
| C | 4.4834939 | 3.4659616  | 0.7019721  |
| C | 2.4496982 | 4.6850800  | 1.3794758  |
| C | 3.1740946 | 5.9039846  | 1.2198680  |
| C | 1.0707117 | 4.6944901  | 1.7465371  |
| H | 0.5837712 | 5.6595518  | 1.9519499  |
| C | 0.3289399 | 3.5234840  | 1.8252981  |
| C | 3.1329626 | -1.4064731 | 0.1829753  |
| C | 4.2975491 | -1.6834260 | 0.8869158  |
| H | 4.8169510 | -2.6384826 | 0.7141289  |
| C | 4.8277711 | -0.7709882 | 1.8440302  |
| C | 5.9766120 | -1.1055781 | 2.6213900  |
| C | 4.1822452 | 0.5042724  | 2.0506175  |
| C | 4.6891707 | 1.3562379  | 3.0778461  |
| C | 3.0360096 | 0.8523779  | 1.2428529  |
| C | 2.5192883 | -0.1367193 | 0.3964542  |
| O | 0.2843268 | 1.1331451  | 1.7024524  |
| O | 1.3885165 | 0.1207762  | -0.3674049 |

|   |            |            |            |
|---|------------|------------|------------|
| P | -0.0882132 | 0.3436715  | 0.3216622  |
| O | -0.7778606 | 1.3072963  | -0.6853917 |
| O | -0.8140414 | -0.9192808 | 0.7623512  |
| C | 4.4998186  | 5.9017172  | 0.8132758  |
| C | 5.1527439  | 4.6712396  | 0.5395711  |
| H | 2.6505454  | 6.8534206  | 1.4134466  |
| H | 5.0422268  | 6.8512144  | 0.6885139  |
| H | 4.9972792  | 2.5199958  | 0.4808224  |
| H | 6.1968676  | 4.6716605  | 0.1912312  |
| C | 5.7977386  | 0.9923080  | 3.8292875  |
| C | 6.4592668  | -0.2413360 | 3.5918198  |
| H | 4.1817189  | 2.3090625  | 3.2813660  |
| H | 6.1620809  | 1.6645587  | 4.6209889  |
| H | 7.3418743  | -0.5158499 | 4.1892197  |
| H | 6.4642233  | -2.0771033 | 2.4442957  |
| C | -2.1062342 | 3.8375404  | 1.1773788  |
| C | -1.1340298 | 3.4413732  | 2.1388023  |
| C | -3.4664800 | 3.6197936  | 1.4682509  |
| C | -1.5466078 | 2.8372170  | 3.3607967  |
| C | -2.9172181 | 2.6227005  | 3.5873914  |
| C | -3.8960304 | 2.9936834  | 2.6503351  |
| C | -0.5517271 | 2.4291647  | 4.4465108  |
| H | -3.2259554 | 2.1339606  | 4.5241087  |
| C | -0.6843181 | 0.9494677  | 4.8453606  |
| H | -1.6623316 | 0.7309502  | 5.3209854  |
| H | 0.1063351  | 0.6732086  | 5.5730492  |
| H | -0.5925278 | 0.2828728  | 3.9667196  |
| C | -0.6781160 | 3.3606066  | 5.6674394  |
| H | 0.4714590  | 2.5715512  | 4.0425903  |
| H | -1.6810555 | 3.2742614  | 6.1352832  |
| H | -0.5315609 | 4.4224540  | 5.3828021  |
| H | 0.0765062  | 3.1024175  | 6.4391692  |
| C | -5.3769846 | 2.7338409  | 2.8996529  |
| C | -5.6551759 | 1.3074703  | 3.4040001  |
| H | -6.7469084 | 1.1135594  | 3.4458503  |
| H | -5.2563945 | 1.1458034  | 4.4264644  |
| H | -5.1878688 | 0.5375492  | 2.7578933  |
| C | -5.9642431 | 3.7889566  | 3.8564918  |
| H | -5.8893584 | 2.8513531  | 1.9181527  |
| H | -7.0535110 | 3.6337592  | 4.0030668  |
| H | -5.8096323 | 4.8161106  | 3.4691809  |
| H | -5.4762630 | 3.7292253  | 4.8519454  |
| C | -1.7155632 | 4.4687422  | -0.1586642 |
| C | -2.5634604 | 3.9702222  | -1.3414425 |
| H | -2.1189692 | 4.2983576  | -2.3026047 |
| H | -3.6003751 | 4.3646052  | -1.3097952 |
| H | -2.6248633 | 2.8652010  | -1.3547040 |
| C | -1.7700454 | 6.0070632  | -0.0786535 |
| H | -0.6659974 | 4.1723340  | -0.3637304 |
| H | -1.4482422 | 6.4647444  | -1.0371339 |
| H | -1.1201664 | 6.4048404  | 0.7254995  |
| H | -2.8044262 | 6.3507147  | 0.1329278  |
| H | 0.1430807  | -5.6320987 | -3.4173686 |
| H | 4.6384963  | -1.9845131 | -4.3975434 |
| H | 3.3355466  | -4.1722906 | 1.8085447  |
| C | 1.2130018  | -5.4126163 | -3.6389830 |
| H | 3.2070948  | 0.8103354  | -3.9211724 |
| H | 0.8913977  | -5.8657923 | -5.7487373 |
| H | -0.4392385 | -3.9411064 | 2.3336812  |
| C | 1.6323114  | -4.2945512 | -2.6884056 |
| C | 4.8721438  | -1.3948703 | -3.4866522 |
| C | 1.3118517  | -5.0513982 | -5.1252558 |
| H | 2.3675426  | -4.9112574 | -5.4388840 |
| C | 2.3758069  | -3.1784094 | -3.1026648 |
| C | 2.2887378  | -4.5325954 | 1.8477174  |
| H | 1.9153437  | -7.0044135 | -2.2789539 |
| C | 1.2988218  | -4.3858775 | -1.3211248 |
| C | 2.0157895  | -6.6951803 | -3.3383418 |
| H | 1.6733854  | -7.5364125 | -3.9759233 |
| H | 0.6750961  | -5.2300012 | -0.9851215 |
| C | 2.6792615  | -0.1052773 | -3.5848160 |

|    |            |            |            |
|----|------------|------------|------------|
| H  | 5.5416060  | -2.0094188 | -2.8515755 |
| H  | 5.4348961  | -0.4950164 | -3.8098701 |
| C  | 2.8365630  | -2.2073396 | -2.1915496 |
| C  | -0.1293059 | -4.0446514 | 1.2748883  |
| C  | 1.7345963  | -3.4458536 | -0.3710054 |
| H  | 1.9970621  | -4.6162478 | 2.9147599  |
| H  | 2.2660548  | -5.5513403 | 1.4063954  |
| C  | 3.5970952  | -0.9946450 | -2.7243138 |
| C  | 2.5560936  | -2.3701922 | -0.8105854 |
| C  | 1.3286512  | -3.5915219 | 1.0952434  |
| H  | 1.7870876  | 0.2097183  | -3.0088423 |
| H  | -0.8190150 | -3.4151712 | 0.6810088  |
| H  | 2.3215718  | -0.6407190 | -4.4891062 |
| H  | 0.7578324  | -4.1231255 | -5.3659125 |
| H  | -0.2754325 | -5.1071460 | 0.9875519  |
| H  | 3.0954797  | -6.5316518 | -3.5374052 |
| H  | 3.9180452  | -0.3882050 | -1.8526760 |
| H  | 1.4108728  | -2.5848350 | 1.5561069  |
| H  | 2.6122460  | -3.0517179 | -4.1691451 |
| Zn | -0.8717516 | 0.8672309  | -2.5442305 |
| Br | -1.0527203 | 1.9534392  | -4.5300669 |
| Zn | -2.7783721 | -0.7337779 | 1.4138624  |
| Br | -3.0396940 | -1.9560228 | 3.3644058  |
| H  | -4.2253805 | 3.9126998  | 0.7255635  |
| C  | -1.3357420 | -2.2689822 | -6.3693578 |
| C  | -0.9966070 | -1.8379583 | -5.0835527 |
| C  | -1.3311956 | -2.6372323 | -3.9659647 |
| C  | -2.0112615 | -3.8626978 | -4.1482867 |
| C  | -2.3530450 | -4.2862154 | -5.4365893 |
| C  | -2.0122706 | -3.4910679 | -6.5457386 |
| H  | -1.0758596 | -1.6496678 | -7.2407456 |
| C  | -1.0002486 | -2.2139799 | -2.6103698 |
| H  | -2.2885864 | -4.4606932 | -3.2669517 |
| H  | -2.8895406 | -5.2355331 | -5.5820828 |
| H  | -2.2780716 | -3.8265936 | -7.5601163 |
| O  | -0.5475596 | -1.0950581 | -2.3020233 |
| H  | -0.4757294 | -0.8808665 | -4.9319290 |
| H  | -1.1336517 | -2.9587627 | -1.7923347 |
| C  | -6.2057705 | -0.9075464 | -0.0749540 |
| C  | -4.9182432 | -0.6639705 | -0.4484383 |
| C  | -4.6079578 | -1.6303851 | -1.5432085 |
| O  | -5.7014795 | -2.4156303 | -1.7848679 |
| C  | -6.7581995 | -2.0309896 | -0.8946655 |
| O  | -3.5705477 | -1.7579392 | -2.1758882 |
| C  | -3.8751865 | 0.2419043  | 0.0445634  |
| H  | -7.0470656 | -2.9195395 | -0.2868075 |
| H  | -7.6461684 | -1.7464493 | -1.5047674 |
| H  | -4.2709694 | 1.1633079  | 0.5094686  |
| H  | -3.1677365 | 0.5114071  | -0.7629001 |
| H  | -6.7723528 | -0.3972334 | 0.7160191  |

### TS3; COSMO

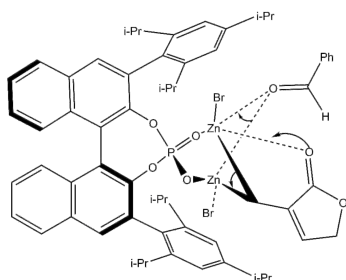

Energy (Hartree) = -11970.01815142

|   |           |           |           |
|---|-----------|-----------|-----------|
| C | 0.6316021 | 2.3389454 | 1.8585572 |
| C | 2.0246049 | 2.2730028 | 1.9127617 |
| C | 2.7444929 | 3.5229702 | 1.9734904 |
| C | 4.1649708 | 3.6023619 | 1.8635526 |
| C | 1.9973602 | 4.7518067 | 2.1163250 |
| C | 2.7057562 | 5.9882983 | 2.1977144 |

|   |            |            |            |
|---|------------|------------|------------|
| C | 0.5709334  | 4.7199398  | 2.1577032  |
| H | 0.0252705  | 5.6634818  | 2.3081872  |
| C | -0.1368441 | 3.5363679  | 1.9957010  |
| C | 3.1040686  | -1.2524170 | 0.7921686  |
| C | 4.0678951  | -1.5572555 | 1.7458676  |
| H | 4.6241583  | -2.5039652 | 1.6657204  |
| C | 4.3327580  | -0.6923261 | 2.8460881  |
| C | 5.2656516  | -1.0600440 | 3.8621750  |
| C | 3.6292783  | 0.5646946  | 2.9532546  |
| C | 3.8539067  | 1.3642750  | 4.1148545  |
| C | 2.7038024  | 0.9433944  | 1.9108179  |
| C | 2.4293320  | -0.0003815 | 0.9128931  |
| O | -0.0872915 | 1.1573877  | 1.7116605  |
| O | 1.5111338  | 0.2916885  | -0.0842941 |
| P | -0.0931000 | 0.4670927  | 0.2306916  |
| O | -0.5303987 | 1.5137825  | -0.8383545 |
| O | -0.8623093 | -0.8353251 | 0.3618498  |
| C | 4.0897917  | 6.0278362  | 2.1105885  |
| C | 4.8215213  | 4.8242823  | 1.9282962  |
| H | 2.1265369  | 6.9173540  | 2.3181520  |
| H | 4.6209022  | 6.9901312  | 2.1687426  |
| H | 4.7417040  | 2.6785387  | 1.7153302  |
| H | 5.9175827  | 4.8595880  | 1.8329900  |
| C | 4.7547176  | 0.9692249  | 5.0945490  |
| C | 5.4801172  | -0.2450890 | 4.9634593  |
| H | 3.2921672  | 2.3003266  | 4.2381895  |
| H | 4.9018264  | 1.6005732  | 5.9841269  |
| H | 6.1970935  | -0.5438968 | 5.7432527  |
| H | 5.8023708  | -2.0163456 | 3.7600072  |
| C | -2.3896714 | 3.8382513  | 0.8570259  |
| C | -1.6304880 | 3.4138352  | 1.9830653  |
| C | -3.7746207 | 3.5801857  | 0.8425174  |
| C | -2.2739971 | 2.7460064  | 3.0643843  |
| C | -3.6560028 | 2.5050727  | 2.9916151  |
| C | -4.4269543 | 2.9032849  | 1.8859531  |
| C | -1.5132546 | 2.2985990  | 4.3115548  |
| H | -4.1428591 | 1.9696679  | 3.8216431  |
| C | -1.7079571 | 0.8037277  | 4.6161396  |
| H | -2.7536098 | 0.5726715  | 4.9058523  |
| H | -1.0537773 | 0.4934304  | 5.4572163  |
| H | -1.4686266 | 0.1782106  | 3.7346562  |
| C | -1.8891916 | 3.1811158  | 5.5173434  |
| H | -0.4313706 | 2.4579884  | 4.1268029  |
| H | -2.9668484 | 3.0810524  | 5.7653088  |
| H | -1.6899802 | 4.2527846  | 5.3113691  |
| H | -1.3073457 | 2.8885193  | 6.4161958  |
| C | -5.9146625 | 2.5851146  | 1.8076863  |
| C | -6.1611288 | 1.0656752  | 1.7698423  |
| H | -7.2428924 | 0.8429379  | 1.6601679  |
| H | -5.8038200 | 0.5716405  | 2.6965637  |
| H | -5.6173987 | 0.5862821  | 0.9315835  |
| C | -6.7038085 | 3.2514772  | 2.9490049  |
| H | -6.2846813 | 3.0130189  | 0.8493723  |
| H | -7.7918686 | 3.0624277  | 2.8392004  |
| H | -6.5436825 | 4.3487143  | 2.9656871  |
| H | -6.3948592 | 2.8505661  | 3.9370318  |
| C | -1.7450679 | 4.5534793  | -0.3292173 |
| C | -2.3371207 | 4.1363659  | -1.6853704 |
| H | -1.7078821 | 4.5094311  | -2.5185617 |
| H | -3.3573613 | 4.5445396  | -1.8414033 |
| H | -2.4074491 | 3.0351024  | -1.7758255 |
| C | -1.8306133 | 6.0840928  | -0.1670382 |
| H | -0.6729412 | 4.2669084  | -0.3372804 |
| H | -1.3269813 | 6.6003561  | -1.0108296 |
| H | -1.3594236 | 6.4284505  | 0.7742458  |
| H | -2.8903468 | 6.4151363  | -0.1479936 |
| H | 1.2994011  | -5.6837158 | -3.3047820 |
| H | 5.2833479  | -1.3527460 | -3.5266594 |
| H | 3.3702617  | -4.6628800 | 2.0826210  |
| C | 2.2512348  | -5.1442176 | -3.5100759 |
| H | 3.5319332  | 1.2465647  | -3.2133986 |

|    |            |            |            |
|----|------------|------------|------------|
| H  | 1.9550500  | -5.4189890 | -5.6548741 |
| H  | -0.3976602 | -4.1908153 | 2.2463159  |
| C  | 2.3842752  | -4.0706606 | -2.4350533 |
| C  | 5.3026982  | -0.7922068 | -2.5687708 |
| C  | 2.1749359  | -4.5987101 | -4.9421617 |
| H  | 3.1357062  | -4.1417295 | -5.2584530 |
| C  | 2.9783089  | -2.8212937 | -2.6829846 |
| C  | 2.2893650  | -4.8905701 | 1.9824280  |
| H  | 3.4239938  | -6.6105728 | -2.3553215 |
| C  | 1.9438894  | -4.3331465 | -1.1234834 |
| C  | 3.3949839  | -6.1702514 | -3.3722238 |
| H  | 3.2776438  | -6.9965877 | -4.1037113 |
| H  | 1.4373245  | -5.2909896 | -0.9173521 |
| C  | 3.0326938  | 0.2817842  | -2.9887141 |
| H  | 5.9198142  | -1.3713282 | -1.8522187 |
| H  | 5.8123428  | 0.1749529  | -2.7583988 |
| C  | 3.1968252  | -1.8763718 | -1.6606833 |
| C  | 0.0155754  | -4.0243628 | 1.2306369  |
| C  | 2.1103515  | -3.4126191 | -0.0711836 |
| H  | 1.8840942  | -5.0835484 | 2.9969556  |
| H  | 2.1980710  | -5.8312095 | 1.3992608  |
| C  | 3.8838521  | -0.5587675 | -2.0178896 |
| C  | 2.7906433  | -2.1888071 | -0.3349058 |
| C  | 1.5271393  | -3.7380153 | 1.3039036  |
| H  | 2.0442571  | 0.5023238  | -2.5411766 |
| H  | -0.5329533 | -3.1683672 | 0.7935180  |
| H  | 2.8648219  | -0.2442075 | -3.9515637 |
| H  | 1.3809980  | -3.8327504 | -5.0499567 |
| H  | -0.2058610 | -4.9315538 | 0.6298469  |
| H  | 4.3765030  | -5.6852463 | -3.5564535 |
| H  | 3.9945834  | 0.0308312  | -1.0857541 |
| H  | 1.6516610  | -2.8364755 | 1.9378529  |
| H  | 3.3044041  | -2.5733395 | -3.7040579 |
| Zn | -0.7338185 | 1.0901921  | -2.6880942 |
| Br | -1.2831013 | 1.8597254  | -4.7612317 |
| Zn | -2.9643564 | -0.9775443 | 0.3824329  |
| Br | -3.5576497 | -1.9373346 | 2.4290048  |
| H  | -4.3706914 | 3.8954598  | -0.0283609 |
| C  | -1.8260331 | -2.8970748 | -5.9182723 |
| C  | -1.2650903 | -2.1592477 | -4.8720298 |
| C  | -0.9263739 | -2.8120111 | -3.6615834 |
| C  | -1.1680060 | -4.1971272 | -3.5057380 |
| C  | -1.7347799 | -4.9273170 | -4.5550700 |
| C  | -2.0576557 | -4.2787627 | -5.7602360 |
| H  | -2.0835104 | -2.3998798 | -6.8656934 |
| C  | -0.3562420 | -2.0760426 | -2.5413652 |
| H  | -0.9264174 | -4.6800702 | -2.5470740 |
| H  | -1.9310876 | -6.0030676 | -4.4364901 |
| H  | -2.4993128 | -4.8549608 | -6.5880377 |
| O  | -0.1934628 | -0.8419773 | -2.5192418 |
| H  | -1.0804766 | -1.0781977 | -4.9767429 |
| H  | -0.0505572 | -2.6593998 | -1.6423169 |
| C  | -4.9121632 | -0.7788759 | -3.3126775 |
| C  | -4.0905107 | -0.8371961 | -2.2301352 |
| C  | -3.6741959 | -2.2577967 | -2.1092944 |
| O  | -4.1916514 | -2.9964611 | -3.1175239 |
| C  | -5.0132611 | -2.1367609 | -3.9334205 |
| O  | -2.9703710 | -2.7453561 | -1.2216378 |
| C  | -3.6063643 | 0.1169706  | -1.2075236 |
| H  | -6.0439211 | -2.5553092 | -3.9424791 |
| H  | -4.6240158 | -2.1678834 | -4.9758067 |
| H  | -4.2957224 | 0.9663992  | -1.0441599 |
| H  | -2.6400279 | 0.5728394  | -1.5257617 |
| H  | -5.4235264 | 0.1064177  | -3.7155497 |

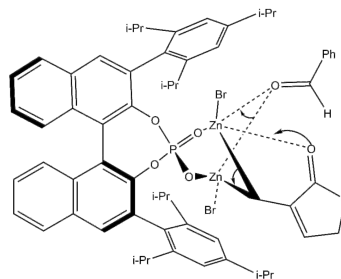

Energy (Hartree) = -11970.00343544  
number of imaginary frequencies: 1

|   |            |            |            |
|---|------------|------------|------------|
| C | 0.6326517  | 2.3403966  | 1.8589552  |
| C | 2.0259243  | 2.2780842  | 1.9071317  |
| C | 2.7423749  | 3.5300292  | 1.9639252  |
| C | 4.1619651  | 3.6135660  | 1.8497400  |
| C | 1.9920527  | 4.7565942  | 2.1081143  |
| C | 2.6975839  | 5.9943604  | 2.1860604  |
| C | 0.5660939  | 4.7203677  | 2.1542891  |
| H | 0.0172455  | 5.6620939  | 2.3044140  |
| C | -0.1396154 | 3.5352187  | 1.9965163  |
| C | 3.1015851  | -1.2497721 | 0.7895385  |
| C | 4.0695069  | -1.5523211 | 1.7393990  |
| H | 4.6229231  | -2.5007259 | 1.6591747  |
| C | 4.3410021  | -0.6841191 | 2.8349743  |
| C | 5.2789434  | -1.0479777 | 3.8470668  |
| C | 3.6382727  | 0.5731779  | 2.9416639  |
| C | 3.8691562  | 1.3760497  | 4.0994527  |
| C | 2.7073326  | 0.9494852  | 1.9032050  |
| C | 2.4280291  | 0.0029943  | 0.9089576  |
| O | -0.0832192 | 1.1571342  | 1.7168346  |
| O | 1.5054445  | 0.2898236  | -0.0851143 |
| P | -0.0983730 | 0.4668105  | 0.2372933  |
| O | -0.5342271 | 1.5157037  | -0.8325345 |
| O | -0.8715922 | -0.8318059 | 0.3687228  |
| C | 4.0807176  | 6.0381083  | 2.0950617  |
| C | 4.8150154  | 4.8370064  | 1.9118658  |
| H | 2.1159534  | 6.9218428  | 2.3069027  |
| H | 4.6089336  | 7.0020722  | 2.1508154  |
| H | 4.7399144  | 2.6906108  | 1.7014657  |
| H | 5.9106955  | 4.8751502  | 1.8138550  |
| C | 4.7753016  | 0.9843632  | 5.0748889  |
| C | 5.4997941  | -0.2297885 | 4.9439559  |
| H | 3.3076519  | 2.3122002  | 4.2218603  |
| H | 4.9270472  | 1.6186932  | 5.9614804  |
| H | 6.2208438  | -0.5263668 | 5.7207546  |
| H | 5.8143164  | -2.0050656 | 3.7453845  |
| C | -2.3948395 | 3.8331040  | 0.8623327  |
| C | -1.6327432 | 3.4073445  | 1.9857599  |
| C | -3.7786289 | 3.5704500  | 0.8492236  |
| C | -2.2722212 | 2.7325509  | 3.0651343  |
| C | -3.6528341 | 2.4857627  | 2.9921299  |
| C | -4.4270528 | 2.8865727  | 1.8901286  |
| C | -1.5098963 | 2.2857842  | 4.3115342  |
| H | -4.1358272 | 1.9428485  | 3.8193407  |
| C | -1.6966339 | 0.7895907  | 4.6142654  |
| H | -2.7408185 | 0.5505147  | 4.9020764  |
| H | -1.0422948 | 0.4819845  | 5.4560141  |
| H | -1.4530159 | 0.1637073  | 3.7345327  |
| C | -1.8920667 | 3.1648176  | 5.5179024  |
| H | -0.4286992 | 2.4521572  | 4.1281317  |
| H | -2.9691783 | 3.0583369  | 5.7648000  |
| H | -1.6999515 | 4.2379905  | 5.3137551  |
| H | -1.3099143 | 2.8744490  | 6.4171952  |
| C | -5.9149145 | 2.5683533  | 1.8160314  |
| C | -6.1662413 | 1.0496881  | 1.7943110  |
| H | -7.2486015 | 0.8290945  | 1.6870598  |

TS3

|    |            |            |            |   |            |            |            |
|----|------------|------------|------------|---|------------|------------|------------|
| H  | -5.8110562 | 0.5614594  | 2.7246845  | O | -0.2057875 | -0.8579973 | -2.5029794 |
| H  | -5.6251367 | 0.5582825  | 0.9615776  | H | -1.0102068 | -1.0799705 | -4.9772022 |
| C  | -6.7001435 | 3.2499326  | 2.9510691  | H | -0.0897088 | -2.6762932 | -1.6216668 |
| H  | -6.2851364 | 2.9881974  | 0.8539056  | C | -4.8966050 | -0.7367080 | -3.3097446 |
| H  | -7.7889567 | 3.0622050  | 2.8468946  | C | -4.0820523 | -0.8133120 | -2.2232396 |
| H  | -6.5367414 | 4.3466118  | 2.9555928  | C | -3.6519911 | -2.2340725 | -2.1330183 |
| H  | -6.3893979 | 2.8598050  | 3.9426650  | O | -4.1618653 | -2.9537233 | -3.1629612 |
| C  | -1.7547066 | 4.5538032  | -0.3232189 | C | -4.9842398 | -2.0828011 | -3.9608297 |
| C  | -2.3443907 | 4.1352552  | -1.6799831 | O | -2.9432467 | -2.7339900 | -1.2603380 |
| H  | -1.7194758 | 4.5133772  | -2.5140817 | C | -3.6104314 | 0.1210649  | -1.1795489 |
| H  | -3.3674482 | 4.5365180  | -1.8354063 | H | -6.0122127 | -2.5091113 | -3.9856529 |
| H  | -2.4080151 | 3.0338179  | -1.7727553 | H | -4.5894450 | -2.0875183 | -5.0021909 |
| C  | -1.8497867 | 6.0835218  | -0.1595399 | H | -4.2963594 | 0.9729278  | -1.0149111 |
| H  | -0.6808370 | 4.2738104  | -0.3325431 | H | -2.6355596 | 0.5752682  | -1.4739000 |
| H  | -1.3489368 | 6.6048070  | -1.0018492 | H | -5.4084265 | 0.1558367  | -3.6954572 |
| H  | -1.3820387 | 6.4295532  | 0.7827168  |   |            |            |            |
| H  | -2.9113047 | 6.4082772  | -0.1397444 |   |            |            |            |
| H  | 1.2774906  | -5.6896050 | -3.2919546 |   |            |            |            |
| H  | 5.2661653  | -1.3670596 | -3.5347922 |   |            |            |            |
| H  | 3.3627387  | -4.6760243 | 2.0818113  |   |            |            |            |
| C  | 2.2349104  | -5.1580215 | -3.4935499 |   |            |            |            |
| H  | 3.5193485  | 1.2363495  | -3.2247050 |   |            |            |            |
| H  | 1.9533956  | -5.4469030 | -5.6391057 |   |            |            |            |
| H  | -0.4011016 | -4.1743003 | 2.2677486  |   |            |            |            |
| C  | 2.3673940  | -4.0780026 | -2.4247529 |   |            |            |            |
| C  | 5.2881923  | -0.8039564 | -2.5785180 |   |            |            |            |
| C  | 2.1721377  | -4.6231320 | -4.9301397 |   |            |            |            |
| H  | 3.1382364  | -4.1748914 | -5.2424828 |   |            |            |            |
| C  | 2.9613330  | -2.8301434 | -2.6791768 |   |            |            |            |
| C  | 2.2789654  | -4.8927076 | 1.9886952  |   |            |            |            |
| H  | 3.3910906  | -6.6227365 | -2.3201643 |   |            |            |            |
| C  | 1.9305373  | -4.3346630 | -1.1111660 |   |            |            |            |
| C  | 3.3707117  | -6.1904932 | -3.3405246 |   |            |            |            |
| H  | 3.2543617  | -7.0218068 | -4.0664954 |   |            |            |            |
| H  | 1.4245531  | -5.2915648 | -0.8987785 |   |            |            |            |
| C  | 3.0187995  | 0.2737536  | -2.9940712 |   |            |            |            |
| H  | 5.9059471  | -1.3827409 | -1.8625494 |   |            |            |            |
| H  | 5.7998724  | 0.1612157  | -2.7724420 |   |            |            |            |
| C  | 3.1834178  | -1.8818878 | -1.6610797 |   |            |            |            |
| C  | 0.0084630  | -4.0047230 | 1.2514537  |   |            |            |            |
| C  | 2.1015140  | -3.4115184 | -0.0621391 |   |            |            |            |
| H  | 1.8785961  | -5.0821349 | 3.0056236  |   |            |            |            |
| H  | 2.1754641  | -5.8330313 | 1.4071474  |   |            |            |            |
| C  | 3.8714194  | -0.5664346 | -2.0244328 |   |            |            |            |
| C  | 2.7818387  | -2.1894200 | -0.3329345 |   |            |            |            |
| C  | 1.5230296  | -3.7328403 | 1.3158527  |   |            |            |            |
| H  | 2.0332943  | 0.4985121  | -2.5425756 |   |            |            |            |
| H  | -0.5366116 | -3.1409987 | 0.8259861  |   |            |            |            |
| H  | 2.8440927  | -0.2539080 | -3.9548005 |   |            |            |            |
| H  | 1.3841909  | -3.8531372 | -5.0507664 |   |            |            |            |
| H  | -0.2268368 | -4.9051458 | 0.6456811  |   |            |            |            |
| H  | 4.3563252  | -5.7127966 | -3.5206401 |   |            |            |            |
| H  | 3.9859078  | 0.0250306  | -1.0939975 |   |            |            |            |
| H  | 1.6598067  | -2.8335147 | 1.9502620  |   |            |            |            |
| H  | 3.2853017  | -2.5863441 | -3.7019069 |   |            |            |            |
| Zn | -0.7626495 | 1.0737718  | -2.6723910 |   |            |            |            |
| Br | -1.2486116 | 1.8537956  | -4.7511396 |   |            |            |            |
| Zn | -2.9831949 | -0.9848316 | 0.4121750  |   |            |            |            |
| Br | -3.5640116 | -1.9382100 | 2.4479727  |   |            |            |            |
| H  | -4.3774513 | 3.8892753  | -0.0185072 |   |            |            |            |
| C  | -1.7505222 | -2.8868101 | -5.9479797 |   |            |            |            |
| C  | -1.2101644 | -2.1595388 | -4.8833225 |   |            |            |            |
| C  | -0.9152804 | -2.8207227 | -3.6668363 |   |            |            |            |
| C  | -1.1805245 | -4.2017852 | -3.5222633 |   |            |            |            |
| C  | -1.7265079 | -4.9208834 | -4.5901286 |   |            |            |            |
| C  | -2.0051965 | -4.2651435 | -5.8019485 |   |            |            |            |
| H  | -1.9728950 | -2.3822570 | -6.9005238 |   |            |            |            |
| C  | -0.3709315 | -2.0904851 | -2.5269942 |   |            |            |            |
| H  | -0.9774125 | -4.6872912 | -2.5561479 |   |            |            |            |
| H  | -1.9429923 | -5.9936900 | -4.4800393 |   |            |            |            |
| H  | -2.4301973 | -4.8332254 | -6.6440721 |   |            |            |            |

### int1; COSMO

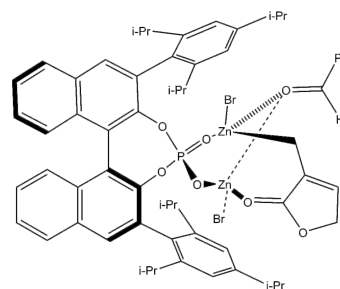

Energy (Hartree) = -11970.04533478

|   |            |            |            |
|---|------------|------------|------------|
| C | 1.2036500  | 2.0518135  | 1.6337895  |
| C | 2.6021797  | 2.0952931  | 1.7096442  |
| C | 3.2388085  | 3.3922256  | 1.6922183  |
| C | 4.6520348  | 3.5610488  | 1.5759308  |
| C | 2.4166760  | 4.5769450  | 1.7568803  |
| C | 3.0398574  | 5.8612745  | 1.7807543  |
| C | 0.9988375  | 4.4499489  | 1.7438956  |
| H | 0.3842953  | 5.3626145  | 1.7789704  |
| C | 0.3719487  | 3.2147378  | 1.6266522  |
| C | 3.9178908  | -1.3817588 | 0.7232296  |
| C | 4.9623091  | -1.5466927 | 1.6244293  |
| H | 5.5841457  | -2.4534009 | 1.5696985  |
| C | 5.2117914  | -0.6046297 | 2.6648298  |
| C | 6.2278236  | -0.8399077 | 3.6396573  |
| C | 4.3940116  | 0.5811947  | 2.7715391  |
| C | 4.5910765  | 1.4372638  | 3.8965461  |
| C | 3.3938709  | 0.8332096  | 1.7600769  |
| C | 3.1693609  | -0.1662071 | 0.8091363  |
| O | 0.5574503  | 0.8177688  | 1.6148233  |
| O | 2.1878993  | 0.0328267  | -0.1585326 |
| P | 0.6124429  | -0.1076381 | 0.2569709  |
| O | -0.1662846 | 0.5506677  | -0.8917880 |
| O | 0.2102618  | -1.5240174 | 0.6787280  |
| C | 4.4185142  | 5.9868359  | 1.7021805  |
| C | 5.2265579  | 4.8248290  | 1.5802077  |
| H | 2.3984852  | 6.7544945  | 1.8439306  |
| H | 4.8864102  | 6.9830395  | 1.7140406  |
| H | 5.2912290  | 2.6740620  | 1.4696752  |
| H | 6.3182241  | 4.9258706  | 1.4816380  |
| C | 5.5749713  | 1.1688682  | 4.8388205  |
| C | 6.4139055  | 0.0308591  | 4.7030541  |
| H | 3.9442507  | 2.3169845  | 4.0197561  |
| H | 5.7010652  | 1.8417560  | 5.7008123  |
| H | 7.1968647  | -0.1670988 | 5.4509607  |
| H | 6.8519630  | -1.7418411 | 3.5390426  |
| C | -1.7019719 | 3.5154332  | 0.2154891  |
| C | -1.1090046 | 3.0929944  | 1.4425136  |

|   |            |            |            |    |            |            |            |
|---|------------|------------|------------|----|------------|------------|------------|
| C | -3.0907352 | 3.3675375  | 0.0553281  | H  | 3.1068354  | -3.0689120 | 2.2943215  |
| C | -1.9224543 | 2.5478923  | 2.4712478  | H  | 2.9169903  | -2.8475824 | -3.6072327 |
| C | -3.3129614 | 2.4527080  | 2.2676154  | Zn | -1.2342289 | -0.0497460 | -2.4002751 |
| C | -3.9207570 | 2.8473392  | 1.0653983  | Br | -0.3156888 | 0.0639169  | -4.5340319 |
| C | -1.3413272 | 2.0854716  | 3.8062390  | Zn | -1.6902762 | -2.1455180 | 0.4531190  |
| H | -3.9313603 | 2.0361558  | 3.0761072  | Br | -2.1138845 | -4.4458753 | 0.7817043  |
| C | -1.6126066 | 0.5929575  | 4.0700177  | H  | -3.5489126 | 3.6705209  | -0.9004410 |
| H | -2.6996101 | 0.3849141  | 4.1585290  | C  | -4.4647946 | -1.7280724 | -5.4961518 |
| H | -1.1355811 | 0.2730801  | 5.0193357  | C  | -3.5427740 | -1.7624360 | -4.4477944 |
| H | -1.2042138 | -0.0351558 | 3.2545732  | C  | -3.6820530 | -2.7316791 | -3.4218408 |
| C | -1.8445706 | 2.9656452  | 4.9655013  | C  | -4.7499878 | -3.6680105 | -3.4787969 |
| H | -0.2410574 | 2.2149469  | 3.7588430  | C  | -5.6747874 | -3.6182294 | -4.5260987 |
| H | -2.9442991 | 2.8805745  | 5.0922081  | C  | -5.5312554 | -2.6469985 | -5.5346540 |
| H | -1.6084689 | 4.0348956  | 4.7896893  | H  | -4.3511282 | -0.9798700 | -6.2945252 |
| H | -1.3727365 | 2.6617506  | 5.9228945  | C  | -2.8082024 | -2.8293093 | -2.2676790 |
| C | -5.4261390 | 2.7578204  | 0.8248368  | H  | -4.8447806 | -4.4255233 | -2.6846349 |
| C | -6.1658529 | 1.8289189  | 1.7948813  | H  | -6.5050043 | -4.3389861 | -4.5649103 |
| H | -7.2273323 | 1.7202668  | 1.4921894  | H  | -6.2549943 | -2.6094372 | -6.3634690 |
| H | -6.1620787 | 2.2329850  | 2.8287513  | O  | -1.9102622 | -2.0248117 | -1.9033412 |
| H | -5.7114595 | 0.8185589  | 1.8225689  | H  | -2.6992794 | -1.0561215 | -4.4379851 |
| C | -6.0586674 | 4.1644942  | 0.8306116  | H  | -2.9701328 | -3.7127719 | -1.6022354 |
| H | -5.5548739 | 2.3442737  | -0.2025587 | C  | -5.3803333 | -1.1651730 | -0.1762020 |
| H | -7.1400999 | 4.1166328  | 0.5854997  | C  | -4.1287029 | -0.6063022 | -0.2445928 |
| H | -5.5696340 | 4.8350245  | 0.0960342  | C  | -4.0841619 | 0.0674327  | -1.5639605 |
| H | -5.9539848 | 4.6310559  | 1.8325157  | O  | -5.2762770 | 0.0027150  | -2.1845718 |
| C | -0.8967673 | 4.1728351  | -0.9074598 | C  | -6.1676163 | -0.7998835 | -1.3849653 |
| C | -1.0926871 | 3.5097819  | -2.2801700 | O  | -3.1326585 | 0.6289720  | -2.1369780 |
| H | -0.5281283 | 4.0604738  | -3.0599409 | C  | -2.9988290 | -0.6008874 | 0.6780956  |
| H | -2.1556398 | 3.4805500  | -2.5951323 | H  | -6.4770421 | -1.6671024 | -2.0127213 |
| H | -0.7044283 | 2.4750473  | -2.2697541 | H  | -7.0785824 | -0.2008996 | -1.1625291 |
| C | -1.2155876 | 5.6800231  | -0.9739070 | H  | -3.3402414 | -0.6943227 | 1.7275034  |
| H | 0.1780581  | 4.0715359  | -0.6576956 | H  | -2.4174627 | 0.3353795  | 0.5745963  |
| H | -0.5826502 | 6.1834770  | -1.7337706 | H  | -5.7867518 | -1.7606939 | 0.6523148  |
| H | -1.0428652 | 6.1781144  | 0.0017950  |    |            |            |            |
| H | -2.2774817 | 5.8512703  | -1.2495717 |    |            |            |            |
| H | 1.3945433  | -6.1208445 | -2.5428788 |    |            |            |            |
| H | 5.3843999  | -2.0785330 | -3.7316527 |    |            |            |            |
| H | 4.8582547  | -4.7802454 | 1.7168647  |    |            |            |            |
| C | 1.4197512  | -5.1092848 | -3.0061320 |    |            |            |            |
| H | 3.9378600  | 0.7861445  | -3.5026672 |    |            |            |            |
| H | -0.6663880 | -5.2492733 | -3.7029853 |    |            |            |            |
| H | 1.4269736  | -4.5296390 | 3.3206242  |    |            |            |            |
| C | 2.2250600  | -4.2146859 | -2.0714611 |    |            |            |            |
| C | 5.5744773  | -1.4036164 | -2.8706446 |    |            |            |            |
| C | -0.0332156 | -4.5939760 | -3.0678861 |    |            |            |            |
| H | -0.0617643 | -3.5679338 | -3.4927682 |    |            |            |            |
| C | 2.8922912  | -3.0656439 | -2.5292034 |    |            |            |            |
| C | 3.8346610  | -5.0747311 | 2.0270145  |    |            |            |            |
| H | 3.0773446  | -5.5774804 | -4.3753817 |    |            |            |            |
| C | 2.2363207  | -4.4755266 | -0.6904989 |    |            |            |            |
| C | 2.0182812  | -5.2507428 | -4.4122267 |    |            |            |            |
| H | 1.4480255  | -5.9960667 | -5.0034192 |    |            |            |            |
| H | 1.7235009  | -5.3783722 | -0.3210872 |    |            |            |            |
| C | 3.3945467  | -0.1291048 | -3.1887921 |    |            |            |            |
| H | 6.2154470  | -1.9515237 | -2.1500414 |    |            |            |            |
| H | 6.1458747  | -0.5289711 | -3.2457912 |    |            |            |            |
| C | 3.5110193  | -2.1633113 | -1.6465435 |    |            |            |            |
| C | 1.4062557  | -4.3589172 | 2.2242124  |    |            |            |            |
| C | 2.8386237  | -3.6071060 | 0.2377390  |    |            |            |            |
| H | 3.8567530  | -5.3065166 | 3.1124030  |    |            |            |            |
| H | 3.5813307  | -6.0103937 | 1.4853247  |    |            |            |            |
| C | 4.2524084  | -0.9556691 | -2.2170938 |    |            |            |            |
| C | 3.4627530  | -2.4218552 | -0.2490441 |    |            |            |            |
| C | 2.8049218  | -3.9690374 | 1.7226262  |    |            |            |            |
| H | 2.4395648  | 0.1787299  | -2.7220642 |    |            |            |            |
| H | 0.6720524  | -3.5615406 | 2.0060452  |    |            |            |            |
| H | 3.1466327  | -0.6958276 | -4.1099037 |    |            |            |            |
| H | -0.4780230 | -4.5525429 | -2.0531315 |    |            |            |            |
| H | 1.0309457  | -5.2902978 | 1.7533256  |    |            |            |            |
| H | 1.9774938  | -4.2933767 | -4.9724891 |    |            |            |            |
| H | 4.5231219  | -0.2933670 | -1.3691100 |    |            |            |            |

### int1

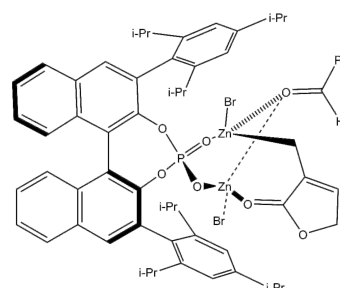

Energy (Hartree) = -11970.03244097

|   |           |            |            |
|---|-----------|------------|------------|
| C | 1.2063251 | 2.0598613  | 1.6441890  |
| C | 2.6049512 | 2.0996262  | 1.7206850  |
| C | 3.2443129 | 3.3951898  | 1.7067757  |
| C | 4.6579384 | 3.5608156  | 1.5937327  |
| C | 2.4253328 | 4.5818981  | 1.7723527  |
| C | 3.0522182 | 5.8637801  | 1.8006884  |
| C | 1.0074805 | 4.4584359  | 1.7548175  |
| H | 0.3942013 | 5.3720652  | 1.7874126  |
| C | 0.3779381 | 3.2251601  | 1.6349935  |
| C | 3.9052489 | -1.3789249 | 0.7198966  |
| C | 4.9496405 | -1.5511938 | 1.6195592  |
| H | 5.5656229 | -2.4615946 | 1.5607972  |
| C | 5.2056580 | -0.6139577 | 2.6623489  |
| C | 6.2216733 | -0.8564811 | 3.6347150  |
| C | 4.3939927 | 0.5753913  | 2.7742132  |
| C | 4.5974697 | 1.4268971  | 3.9011908  |
| C | 3.3932406 | 0.8351258  | 1.7656281  |
| C | 3.1634384 | -0.1598372 | 0.8112835  |
| O | 0.5555725 | 0.8288296  | 1.6249948  |
| O | 2.1807757 | 0.0466357  | -0.1533076 |
| P | 0.6080128 | -0.0964713 | 0.2672064  |



|   |            |            |            |    |            |            |            |
|---|------------|------------|------------|----|------------|------------|------------|
| O | -0.1780408 | 0.5623613  | -0.8765309 | H  | 6.1234055  | -0.5155901 | -3.2526936 |
| O | 0.2091363  | -1.5134727 | 0.6891792  | C  | 3.4900319  | -2.1497231 | -1.6515806 |
| C | 4.4308284  | 5.9860756  | 1.7260314  | C  | 1.3892653  | -4.3594887 | 2.2145406  |
| C | 5.2355899  | 4.8226316  | 1.6030881  | C  | 2.8196406  | -3.6000026 | 0.2284528  |
| H | 2.4128912  | 6.7584409  | 1.8640762  | H  | 3.8410811  | -5.3129302 | 3.0934546  |
| H | 4.9011292  | 6.9810395  | 1.7415887  | H  | 3.5607581  | -6.0092751 | 1.4643599  |
| H | 5.2939729  | 2.6717959  | 1.4868532  | C  | 4.2316292  | -0.9411122 | -2.2199624 |
| H | 6.3277273  | 4.9207421  | 1.5074754  | C  | 3.4443893  | -2.4137823 | -0.2551761 |
| C | 5.5819418  | 1.1513417  | 4.8401516  | C  | 2.7871163  | -3.9680649 | 1.7119211  |
| C | 6.4145119  | 0.0099723  | 4.6997326  | H  | 2.4221463  | 0.2039393  | -2.7142627 |
| H | 3.9549662  | 2.3092811  | 4.0270859  | H  | 0.6555783  | -3.5591088 | 2.0069996  |
| H | 5.7131364  | 1.8214531  | 5.7034792  | H  | 3.1174115  | -0.6710218 | -4.1075562 |
| H | 7.1979727  | -0.1941805 | 5.4453687  | H  | -0.4930125 | -4.5804246 | -2.0541586 |
| H | 6.8404739  | -1.7616412 | 3.5304999  | H  | 1.0090204  | -5.2861544 | 1.7386837  |
| C | -1.6883575 | 3.5231989  | 0.2125483  | H  | 1.9401876  | -4.6099997 | -4.9835911 |
| C | -1.1023341 | 3.1056339  | 1.4442686  | H  | 4.5065598  | -0.2825554 | -1.3703722 |
| C | -3.0758911 | 3.3735979  | 0.0454625  | H  | 3.0906118  | -3.0708423 | 2.2874013  |
| C | -1.9209844 | 2.5640874  | 2.4704280  | H  | 2.8946478  | -2.8721699 | -3.6135177 |
| C | -3.3099922 | 2.4671393  | 2.2594576  | Zn | -1.2229449 | -0.0321263 | -2.3999730 |
| C | -3.9109593 | 2.8569153  | 1.0525933  | Br | -0.3465920 | 0.0357860  | -4.5438489 |
| C | -1.3462926 | 2.1082693  | 3.8104204  | Zn | -1.6805198 | -2.1550653 | 0.4648666  |
| H | -3.9326150 | 2.0540742  | 3.0664992  | Br | -2.1419611 | -4.4422917 | 0.7726298  |
| C | -1.6175785 | 0.6171597  | 4.0809346  | H  | -3.5286527 | 3.6719959  | -0.9143520 |
| H | -2.7048093 | 0.4079712  | 4.1645875  | C  | -4.4830567 | -1.7505476 | -5.4734392 |
| H | -1.1464998 | 0.3025692  | 5.0348399  | C  | -3.5587081 | -1.7678667 | -4.4259434 |
| H | -1.2025353 | -0.0154559 | 3.2725826  | C  | -3.6691104 | -2.7498699 | -3.4098960 |
| C | -1.8547786 | 2.9951692  | 4.9620504  | C  | -4.7105493 | -3.7141045 | -3.4744409 |
| H | -0.2458757 | 2.2376755  | 3.7668634  | C  | -5.6376467 | -3.6815239 | -4.5203923 |
| H | -2.9550677 | 2.9117475  | 5.0843157  | C  | -5.5226025 | -2.6979660 | -5.5205506 |
| H | -1.6183330 | 4.0632473  | 4.7809410  | H  | -4.3894795 | -0.9914623 | -6.2641417 |
| H | -1.3880942 | 2.6972918  | 5.9237831  | C  | -2.7863636 | -2.8378871 | -2.2580867 |
| C | -5.4152690 | 2.7689761  | 0.8047754  | H  | -4.7810845 | -4.4807497 | -2.6862464 |
| C | -6.1593593 | 1.8333080  | 1.7651019  | H  | -6.4465616 | -4.4259576 | -4.5658518 |
| H | -7.2203799 | 1.7278881  | 1.4591612  | H  | -6.2476062 | -2.6741151 | -6.3489008 |
| H | -6.1598554 | 2.2298055  | 2.8017962  | O  | -1.9091974 | -2.0151356 | -1.8910732 |
| H | -5.7054676 | 0.8226522  | 1.7871687  | H  | -2.7339562 | -1.0393709 | -4.4113094 |
| C | -6.0471882 | 4.1756998  | 0.8184207  | H  | -2.9246171 | -3.7305068 | -1.5981444 |
| H | -5.5401832 | 2.3620150  | -0.2259207 | C  | -5.3579601 | -1.2078372 | -0.1720986 |
| H | -7.1278173 | 4.1321660  | 0.5687434  | C  | -4.1172596 | -0.6226201 | -0.2271628 |
| H | -5.5536789 | 4.8515180  | 0.0920045  | C  | -4.0759653 | 0.0601338  | -1.5444923 |
| H | -5.9452992 | 4.6348992  | 1.8237717  | O  | -5.2670863 | -0.0192802 | -2.1700588 |
| C | -0.8775237 | 4.1780794  | -0.9078512 | C  | -6.1456225 | -0.8441631 | -1.3827719 |
| C | -1.0633386 | 3.5118474  | -2.2804577 | O  | -3.1310729 | 0.6343901  | -2.1097374 |
| H | -0.5014608 | 4.0656823  | -3.0596953 | C  | -2.9921534 | -0.6053950 | 0.6957039  |
| H | -2.1245263 | 3.4719544  | -2.6000667 | H  | -6.4358713 | -1.7103261 | -2.0220485 |
| H | -0.6647306 | 2.4811360  | -2.2689052 | H  | -7.0680774 | -0.2622000 | -1.1591337 |
| C | -1.1987527 | 5.6844892  | -0.9790845 | H  | -3.3276621 | -0.7103138 | 1.7457442  |
| H | 0.1958721  | 4.0795247  | -0.6509932 | H  | -2.4124167 | 0.3312647  | 0.5916174  |
| H | -0.5618642 | 6.1884529  | -1.7351856 | H  | -5.7536743 | -1.8199233 | 0.6494014  |
| H | -1.0345329 | 6.1845967  | -0.0030642 |    |            |            |            |
| H | -2.2589507 | 5.8540369  | -1.2618824 |    |            |            |            |
| H | 1.4013631  | -6.1146640 | -2.5643974 |    |            |            |            |
| H | 5.3572935  | -2.0615591 | -3.7411515 |    |            |            |            |
| H | 4.8393245  | -4.7831132 | 1.6966496  |    |            |            |            |
| C | 1.4085959  | -5.0992099 | -3.0198751 |    |            |            |            |
| H | 3.9179765  | 0.8049548  | -3.5005433 |    |            |            |            |
| H | -0.6779632 | -5.2675327 | -3.7083573 |    |            |            |            |
| H | 1.4121651  | -4.5386122 | 3.3093780  |    |            |            |            |
| C | 2.2064321  | -4.2008865 | -2.0822092 |    |            |            |            |
| C | 5.5507812  | -1.3898286 | -2.8786176 |    |            |            |            |
| C | -0.0524973 | -4.6065000 | -3.0713413 |    |            |            |            |
| H | -0.0977917 | -3.5787626 | -3.4904668 |    |            |            |            |
| C | 2.8705458  | -3.0491410 | -2.5363844 |    |            |            |            |
| C | 3.8161599  | -5.0762550 | 2.0092528  |    |            |            |            |
| H | 3.0667494  | -5.5281879 | -4.4007742 |    |            |            |            |
| C | 2.2171388  | -4.4651212 | -0.7021879 |    |            |            |            |
| C | 2.0018242  | -5.2209468 | -4.4298769 |    |            |            |            |
| H | 1.4424728  | -5.9724481 | -5.0236345 |    |            |            |            |
| H | 1.7055762  | -5.3695931 | -0.3351395 |    |            |            |            |
| C | 3.3729157  | -0.1087986 | -3.1859087 |    |            |            |            |
| H | 6.1921265  | -1.9422948 | -2.1621203 |    |            |            |            |

## int2; COSMO

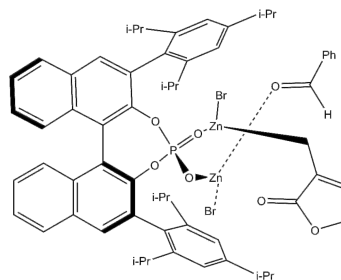

Energy (Hartree) = -11970.01651383

|   |           |           |           |
|---|-----------|-----------|-----------|
| C | 0.7495503 | 2.2795373 | 1.9051609 |
| C | 2.1444439 | 2.2342866 | 1.8909042 |
| C | 2.8449646 | 3.4966999 | 1.9045147 |
| C | 4.2574520 | 3.5999744 | 1.7310016 |
| C | 2.0822923 | 4.7142679 | 2.0654732 |
| C | 2.7719743 | 5.9634003 | 2.1070574 |
| C | 0.6581451 | 4.6629200 | 2.1493239 |

|   |            |            |            |    |            |            |            |
|---|------------|------------|------------|----|------------|------------|------------|
| H | 0.1038092  | 5.6031336  | 2.2876867  | H  | -0.5443968 | -4.0437941 | 2.2416295  |
| C | -0.0369246 | 3.4665391  | 2.0285145  | C  | 2.1544821  | -4.0513631 | -2.4764103 |
| C | 3.1843241  | -1.2887700 | 0.7147766  | C  | 5.4211093  | -1.0839068 | -2.6822496 |
| C | 4.2172708  | -1.5780498 | 1.5971852  | C  | 2.0515858  | -4.6314109 | -4.9797463 |
| H | 4.7842540  | -2.5138607 | 1.4777586  | H  | 3.1155381  | -4.4120835 | -5.2083967 |
| C | 4.5473781  | -0.7043226 | 2.6738267  | C  | 2.9213816  | -2.9032724 | -2.7304011 |
| C | 5.5537336  | -1.0573532 | 3.6226874  | C  | 2.2360065  | -4.5300856 | 2.0942444  |
| C | 3.8359370  | 0.5433535  | 2.8298526  | H  | 2.5734256  | -6.7601476 | -2.2440353 |
| C | 4.1269324  | 1.3455900  | 3.9746683  | C  | 1.6609020  | -4.2308232 | -1.1676441 |
| C | 2.8398654  | 0.9121891  | 1.8506415  | C  | 2.7321244  | -6.3671825 | -3.2682508 |
| C | 2.5158617  | -0.0384908 | 0.8739906  | H  | 2.4881284  | -7.1752984 | -3.9886792 |
| O | 0.0471150  | 1.0820931  | 1.8269852  | H  | 1.0207432  | -5.1038428 | -0.9620302 |
| O | 1.5338277  | 0.2430132  | -0.0684855 | C  | 3.2417384  | 0.1861449  | -3.0155907 |
| P | -0.0473852 | 0.3719277  | 0.3616406  | H  | 6.0088456  | -1.7222753 | -1.9918766 |
| O | -0.5935613 | 1.3760078  | -0.6940257 | H  | 6.0067037  | -0.1630747 | -2.8823097 |
| O | -0.7730569 | -0.9450567 | 0.5973953  | C  | 3.2435595  | -1.9799315 | -1.7155175 |
| C | 4.1501990  | 6.0258216  | 1.9621662  | C  | -0.0976004 | -4.0768815 | 1.2281116  |
| C | 4.8943842  | 4.8336063  | 1.7576623  | C  | 1.9469870  | -3.3365735 | -0.1209559 |
| H | 2.1820618  | 6.8836657  | 2.2420744  | H  | 1.8085241  | -4.6784425 | 3.1073367  |
| H | 4.6663371  | 6.9975301  | 1.9901466  | H  | 2.3012781  | -5.5236570 | 1.6025708  |
| H | 4.8437870  | 2.6854377  | 1.5649790  | C  | 4.0484198  | -0.7343568 | -2.0808234 |
| H | 5.9844814  | 4.8869781  | 1.6145945  | C  | 2.7883612  | -2.2200635 | -0.3931017 |
| C | 5.0982895  | 0.9637792  | 4.8901166  | C  | 1.3547171  | -3.5728614 | 1.2684356  |
| C | 5.8312692  | -0.2392000 | 4.7075222  | H  | 2.2770708  | 0.4625047  | -2.5452788 |
| H | 3.5612740  | 2.2733746  | 4.1365996  | H  | -0.7311191 | -3.4420235 | 0.5802075  |
| H | 5.2965507  | 1.5968938  | 5.7684071  | H  | 3.0121042  | -0.3057084 | -3.9835286 |
| H | 6.6045062  | -0.5274940 | 5.4357870  | H  | 1.4622584  | -3.7162222 | -5.1864446 |
| H | 6.0957212  | -2.0059319 | 3.4835373  | H  | -0.1644834 | -5.1258994 | 0.8711319  |
| C | -2.2725792 | 3.7565136  | 0.8603515  | H  | 3.8112467  | -6.1281605 | -3.3730509 |
| C | -1.5293239 | 3.3235510  | 1.9958293  | H  | 4.2388798  | -0.1683043 | -1.1461483 |
| C | -3.6515729 | 3.4726226  | 0.8082967  | H  | 1.3424152  | -2.5905559 | 1.7862002  |
| C | -2.1871707 | 2.6200287  | 3.0464721  | H  | 3.2872760  | -2.7119430 | -3.7499943 |
| C | -3.5616465 | 2.3490338  | 2.9327913  | Zn | -0.2838003 | 1.0760160  | -2.5558392 |
| C | -4.3143358 | 2.7545866  | 1.8169274  | Br | -0.0607735 | 2.1659477  | -4.5395154 |
| C | -1.4543797 | 2.1700119  | 4.3094307  | Zn | -2.8346515 | -0.9526113 | 0.6247787  |
| H | -4.0576282 | 1.7891592  | 3.7409321  | Br | -3.5511270 | -2.1996078 | 2.4572664  |
| C | -1.6360646 | 0.6698026  | 4.5972554  | H  | 4.2324538  | 3.7971970  | -0.0694522 |
| H | -2.6884030 | 0.4178994  | 4.8415315  | C  | -0.9255493 | -2.1976448 | -6.3915099 |
| H | -1.0131929 | 0.3655255  | 5.4636579  | C  | -0.6227853 | -1.7166219 | -5.1151323 |
| H | -1.3444275 | 0.0528612  | 3.7257326  | C  | -0.8779742 | -2.5274369 | -3.9815773 |
| C | -1.8803762 | 3.0340932  | 5.5123077  | C  | -1.4452399 | -3.8148488 | -4.1400669 |
| H | -0.3703074 | 2.3485119  | 4.1573624  | C  | -1.7497500 | -4.2870328 | -5.4214947 |
| H | -2.9616721 | 2.9091275  | 5.7310814  | C  | -1.4863232 | -3.4816213 | -6.5442289 |
| H | -1.6985589 | 4.1113348  | 5.3204013  | H  | -0.7227424 | -1.5750986 | -7.2757236 |
| H | -1.3158737 | 2.7457605  | 6.4233858  | C  | -0.5494249 | -2.0687308 | -2.6391265 |
| C | -5.7982064 | 2.4277292  | 1.7027204  | H  | -1.6710463 | -4.4158909 | -3.2471969 |
| C | -6.0696317 | 0.9165343  | 1.8076395  | H  | -2.1958318 | -5.2843887 | -5.5496805 |
| H | -7.1455469 | 0.6988111  | 1.6451143  | H  | -1.7210214 | -3.8571299 | -7.5522858 |
| H | -5.7946499 | 0.5174348  | 2.8053682  | O  | -0.1622424 | -0.9161805 | -2.3564535 |
| H | -5.4852998 | 0.3405794  | 1.0629690  | H  | -0.1774090 | -0.7180452 | -4.9837879 |
| C | -6.6229957 | 3.2162799  | 2.7371523  | H  | -0.6313389 | -2.8009977 | -1.8064268 |
| H | -6.1218977 | 2.7604903  | 0.6911787  | C  | -5.9360480 | -0.7170912 | -1.7864471 |
| H | -7.7078492 | 3.0158631  | 2.6155858  | C  | -4.6026214 | -0.8642918 | -1.5548929 |
| H | -6.4595473 | 4.3084567  | 2.6370504  | C  | -4.2724579 | -2.2804261 | -1.8844984 |
| H | -6.3418583 | 2.9268640  | 3.7714721  | O  | -5.3841521 | -2.9177747 | -2.3490934 |
| C | -1.6208582 | 4.5002535  | -0.3049024 | C  | -6.4984803 | -2.0095585 | -2.2903489 |
| C | -2.1624732 | 4.0746831  | -1.6805339 | O  | -3.1968740 | -2.8533691 | -1.7533069 |
| H | -1.5235718 | 4.4792897  | -2.4911860 | C  | -3.5543875 | -0.0018042 | -0.9945238 |
| H | -3.1922706 | 4.4477741  | -1.8593791 | H  | -7.2676236 | -2.4514398 | -1.6170823 |
| H | -2.1863688 | 2.9719357  | -1.7804608 | H  | -6.9490692 | -1.9317537 | -3.3053517 |
| C | -1.7611126 | 6.0260360  | -0.1344606 | H  | -3.8785660 | 1.0347099  | -0.7878097 |
| H | -0.5397597 | 4.2505323  | -0.2877892 | H  | -2.6619863 | 0.0174466  | -1.6546293 |
| H | -1.2512964 | 6.5646856  | -0.9602017 | H  | -6.5421095 | 0.1867003  | -1.6348728 |
| H | -1.3290228 | 6.3788916  | 0.8224164  |    |            |            |            |
| H | -2.8312500 | 6.3221155  | -0.1434305 |    |            |            |            |
| H | 0.8078109  | -5.4104994 | -3.4088008 |    |            |            |            |
| H | 5.3206872  | -1.6298876 | -3.6433939 |    |            |            |            |
| H | 3.2678814  | -4.1452477 | 2.2130308  |    |            |            |            |
| C | 1.8738337  | -5.1133941 | -3.5352498 |    |            |            |            |
| H | 3.7918128  | 1.1244339  | -3.2321825 |    |            |            |            |
| H | 1.7191719  | -5.4148210 | -5.6901448 |    |            |            |            |

int2



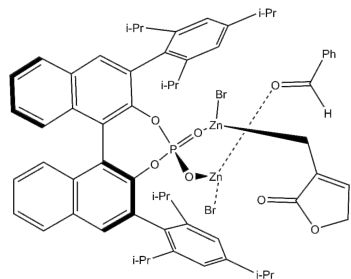

Energy (Hartree) = -11970.0042554

|   |            |            |            |
|---|------------|------------|------------|
| C | 0.7393933  | 2.2834324  | 1.8954029  |
| C | 2.1338942  | 2.2362482  | 1.8679023  |
| C | 2.8368073  | 3.4970409  | 1.8647993  |
| C | 4.2481111  | 3.5957178  | 1.6814575  |
| C | 2.0776729  | 4.7174146  | 2.0194335  |
| C | 2.7704379  | 5.9647084  | 2.0431927  |
| C | 0.6544265  | 4.6688622  | 2.1157086  |
| H | 0.1017641  | 5.6107775  | 2.2490395  |
| C | -0.0441271 | 3.4730043  | 2.0144159  |
| C | 3.1491029  | -1.2985458 | 0.7086588  |
| C | 4.1846639  | -1.5875939 | 1.5878451  |
| H | 4.7444951  | -2.5279763 | 1.4699683  |
| C | 4.5271227  | -0.7086963 | 2.6559178  |
| C | 5.5365156  | -1.0599010 | 3.6014416  |
| C | 3.8250240  | 0.5446971  | 2.8058589  |
| C | 4.1291086  | 1.3547981  | 3.9414022  |
| C | 2.8245304  | 0.9116246  | 1.8308719  |
| C | 2.4884717  | -0.0434340 | 0.8623386  |
| O | 0.0359270  | 1.0863317  | 1.8352852  |
| O | 1.5011953  | 0.2378247  | -0.0745085 |
| P | -0.0776737 | 0.3674923  | 0.3748791  |
| O | -0.6333797 | 1.3687709  | -0.6787873 |
| O | -0.7987231 | -0.9477642 | 0.6215457  |
| C | 4.1473056  | 6.0231070  | 1.8888827  |
| C | 4.8875337  | 4.8278128  | 1.6923158  |
| H | 2.1831526  | 6.8874971  | 2.1722118  |
| H | 4.6652364  | 6.9940882  | 1.9035321  |
| H | 4.8304442  | 2.6775612  | 1.5218631  |
| H | 5.9769061  | 4.8772933  | 1.5428502  |
| C | 5.1038707  | 0.9746262  | 4.8531760  |
| C | 5.8268643  | -0.2346264 | 4.6767819  |
| H | 3.5702599  | 2.2875527  | 4.0976360  |
| H | 5.3122027  | 1.6141544  | 5.7243880  |
| H | 6.6026652  | -0.5221711 | 5.4025222  |
| H | 6.0706781  | -2.0136449 | 3.4674559  |
| C | -2.2922503 | 3.7426476  | 0.8652818  |
| C | -1.5365358 | 3.3290273  | 1.9993955  |
| C | -3.6690791 | 3.4480414  | 0.8293821  |
| C | -2.1800383 | 2.6367134  | 3.0658781  |
| C | -3.5527623 | 2.3525919  | 2.9669300  |
| C | -4.3174180 | 2.7373111  | 1.8521921  |
| C | -1.4331446 | 2.2153467  | 4.3303479  |
| H | -4.0368683 | 1.7985858  | 3.7859786  |
| C | -1.6029607 | 0.7212005  | 4.6528429  |
| H | -2.6509138 | 0.4657519  | 4.9111631  |
| H | -0.9713927 | 0.4398942  | 5.5205351  |
| H | -1.3146999 | 0.0851900  | 3.7942765  |
| C | -1.8526639 | 3.1041935  | 5.5173615  |
| H | -0.3515673 | 2.3969117  | 4.1639399  |
| H | -2.9313035 | 2.9793058  | 5.7483115  |
| H | -1.6788537 | 4.1777786  | 5.3000656  |
| H | -1.2794282 | 2.8390047  | 6.4299353  |
| C | -5.8006359 | 2.4019275  | 1.7556373  |
| C | -6.0709541 | 0.8961215  | 1.9180741  |
| H | -7.1461594 | 0.6703312  | 1.7616429  |
| H | -5.7994257 | 0.5334464  | 2.9302622  |

|    |            |            |            |
|----|------------|------------|------------|
| H  | -5.4835142 | 0.2904834  | 1.1998986  |
| C  | -6.6220022 | 3.2291846  | 2.7622279  |
| H  | -6.1282783 | 2.6968994  | 0.7333198  |
| H  | -7.7072966 | 3.0228624  | 2.6554228  |
| H  | -6.4602340 | 4.3166447  | 2.6194333  |
| H  | -6.3339647 | 2.9811371  | 3.8051747  |
| C  | -1.6555042 | 4.4761805  | -0.3146182 |
| C  | -2.2130831 | 4.0394631  | -1.6803338 |
| H  | -1.5811766 | 4.4317366  | -2.5023401 |
| H  | -3.2426833 | 4.4163659  | -1.8525866 |
| H  | -2.2440864 | 2.9359085  | -1.7686356 |
| C  | -1.7941849 | 6.0031950  | -0.1555244 |
| H  | -0.5741045 | 4.2269330  | -0.3084765 |
| H  | -1.2956422 | 6.5356481  | -0.9920193 |
| H  | -1.3505934 | 6.3644949  | 0.7927596  |
| H  | -2.8642913 | 6.2989957  | -0.1522186 |
| H  | 0.7704058  | -5.3943540 | -3.4412107 |
| H  | 5.3788646  | -1.7196761 | -3.5720180 |
| H  | 3.1504115  | -4.0750045 | 2.2599289  |
| C  | 1.8500140  | -5.1345459 | -3.5332607 |
| H  | 3.8625131  | 1.0694608  | -3.2472401 |
| H  | 1.7614259  | -5.4579209 | -5.6893456 |
| H  | -0.6689459 | -3.9851704 | 2.1754309  |
| C  | 2.1290893  | -4.0688349 | -2.4774392 |
| C  | 5.4542332  | -1.1545858 | -2.6196633 |
| C  | 2.0928550  | -4.6768052 | -4.9760357 |
| H  | 3.1707668  | -4.4946335 | -5.1690962 |
| C  | 2.9201122  | -2.9364339 | -2.7252464 |
| C  | 2.1277769  | -4.4749610 | 2.1156350  |
| H  | 2.4521979  | -6.7874128 | -2.2009445 |
| C  | 1.6055939  | -4.2279640 | -1.1778388 |
| C  | 2.6563761  | -6.4125010 | -3.2236521 |
| H  | 2.4107357  | -7.2216391 | -3.9423267 |
| H  | 0.9452971  | -5.0870199 | -0.9775369 |
| C  | 3.3010281  | 0.1352933  | -3.0424731 |
| H  | 6.0127901  | -1.7851136 | -1.8987934 |
| H  | 6.0566442  | -0.2446943 | -2.8199115 |
| C  | 3.2368447  | -2.0104066 | -1.7113737 |
| C  | -0.1859080 | -4.0627732 | 1.1814731  |
| C  | 1.8858927  | -3.3312195 | -0.1321174 |
| H  | 1.6708251  | -4.6096435 | 3.1174892  |
| H  | 2.2201138  | -5.4764875 | 1.6451501  |
| C  | 4.0670165  | -0.7796803 | -2.0696001 |
| C  | 2.7522017  | -2.2322930 | -0.3967895 |
| C  | 1.2603311  | -3.5441608 | 1.2462577  |
| H  | 2.3182285  | 0.4205661  | -2.6182298 |
| H  | -0.8032664 | -3.4666063 | 0.4828570  |
| H  | 3.1082462  | -0.3636167 | -4.0149720 |
| H  | 1.5411537  | -3.7462421 | -5.2150161 |
| H  | -0.2331194 | -5.1279651 | 0.8720387  |
| H  | 3.7455040  | -6.2100489 | -3.2939840 |
| H  | 4.2333605  | -0.2018336 | -1.1376596 |
| H  | 1.2254289  | -2.5511763 | 1.7418963  |
| H  | 3.3100251  | -2.7597020 | -3.7384748 |
| Zn | -0.2730313 | 1.0872456  | -2.5341154 |
| Br | 0.0370460  | 2.2314983  | -4.4716955 |
| Zn | -2.8681905 | -0.9573853 | 0.7274778  |
| Br | -3.5240200 | -2.1529230 | 2.5984631  |
| H  | -4.2600392 | 3.7575290  | -0.0470307 |
| C  | -0.6629206 | -2.0454886 | -6.4688779 |
| C  | -0.4346390 | -1.6171327 | -5.1584116 |
| C  | -0.7938000 | -2.4550550 | -4.0747270 |
| C  | -1.3919566 | -3.7146732 | -4.3164037 |
| C  | -1.6229889 | -4.1323372 | -5.6317497 |
| C  | -1.2542886 | -3.3019478 | -6.7050849 |
| H  | -0.3786127 | -1.4003259 | -7.3135804 |
| C  | -0.5405608 | -2.0491483 | -2.6965866 |
| H  | -1.7062677 | -4.3302560 | -3.4610970 |
| H  | -2.0952664 | -5.1069990 | -5.8248696 |
| H  | -1.4309945 | -3.6356791 | -7.7393975 |
| O  | -0.1681708 | -0.9094236 | -2.3522273 |

|   |            |            |            |
|---|------------|------------|------------|
| H | 0.0302916  | -0.6383678 | -4.9620856 |
| H | -0.6648309 | -2.8121298 | -1.8984408 |
| C | -5.9822505 | -0.8417431 | -1.5881524 |
| C | -4.6293030 | -0.9435638 | -1.4724127 |
| C | -4.2697421 | -2.3162313 | -1.9380302 |
| O | -5.3950375 | -2.9720115 | -2.3469900 |
| C | -6.5323297 | -2.1239012 | -2.1315459 |
| O | -3.1659008 | -2.8433900 | -1.9618057 |
| C | -3.5843591 | -0.0692376 | -0.9293394 |
| H | -7.2232620 | -2.6425238 | -1.4275954 |
| H | -7.0735546 | -2.0029801 | -3.0977318 |
| H | -3.9179624 | 0.9656104  | -0.7269975 |
| H | -2.6934772 | -0.0513317 | -1.5895606 |
| H | -6.6071941 | 0.0214317  | -1.3213594 |

|   |            |            |            |
|---|------------|------------|------------|
| H | 7.0392400  | -1.4533775 | 2.6466254  |
| C | -1.8512183 | 3.7617673  | 0.4951508  |
| C | -1.2581187 | 3.1893954  | 1.6645739  |
| C | -3.2301555 | 3.5878029  | 0.2900150  |
| C | -2.0639472 | 2.4789012  | 2.5909365  |
| C | -3.4526757 | 2.3849697  | 2.3621352  |
| C | -4.0584767 | 2.9215220  | 1.2146930  |
| C | -1.4830642 | 1.8328616  | 3.8463930  |
| H | -4.0677063 | 1.8566271  | 3.1052488  |
| C | -1.7811518 | 0.3229945  | 3.9026058  |
| H | -2.8677203 | 0.1228106  | 4.0110395  |
| H | -1.2714834 | -0.1447814 | 4.7697916  |
| H | -1.4268706 | -0.1907460 | 2.9877735  |
| C | -1.9680924 | 2.5539665  | 5.1176459  |
| H | -0.3814830 | 1.9511275  | 3.8072516  |
| H | -3.0694808 | 2.4750956  | 5.2333340  |
| H | -1.7098014 | 3.6320866  | 5.0916010  |
| H | -1.5036778 | 2.1099495  | 6.0223322  |
| C | -5.5538431 | 2.8168162  | 0.9259310  |
| C | -6.3095576 | 1.8484062  | 1.8441608  |
| H | -7.3611785 | 1.7385841  | 1.5095993  |
| H | -6.3385649 | 2.2195763  | 2.8899785  |
| H | -5.8528042 | 0.8380770  | 1.8626289  |
| C | -6.2165418 | 4.2087504  | 0.9546971  |
| H | -5.6286268 | 2.4341463  | -0.1192801 |
| H | -7.2876660 | 4.1436122  | 0.6723286  |
| H | -5.7232675 | 4.9134236  | 0.2564727  |
| H | -6.1559555 | 4.6465952  | 1.9730792  |
| C | -1.0595332 | 4.5879209  | -0.5219216 |
| C | -1.2460037 | 4.1331822  | -1.9775992 |
| H | -0.6273619 | 4.7635770  | -2.6494162 |
| H | -2.2973497 | 4.2132213  | -2.3198340 |
| H | -0.9346940 | 3.0796525  | -2.1044984 |
| C | -1.4035225 | 6.0832684  | -0.3678652 |
| H | 0.0166537  | 4.4688433  | -0.2912431 |
| H | -0.7790900 | 6.7018849  | -1.0453962 |
| H | -1.2427224 | 6.4415344  | 0.6693006  |
| H | -2.4679263 | 6.2730592  | -0.6205909 |
| H | 0.2871944  | -6.3584053 | -0.7135684 |
| H | 4.0780868  | -3.1542170 | -3.9425339 |
| H | 3.4648474  | -4.1689638 | 3.9677518  |
| C | 0.6351561  | -5.8083192 | -1.6145671 |
| H | 2.8654585  | -0.2304977 | -4.1571996 |
| H | -1.1802926 | -6.3033769 | -2.7419970 |
| H | 1.2491428  | -2.9139621 | 4.1015371  |
| C | 1.4051289  | -4.5929469 | -1.1128608 |
| C | 4.4930291  | -2.3277403 | -3.3280469 |
| C | -0.6118843 | -5.4073665 | -2.4158634 |
| C | -0.3336216 | -4.8394714 | -3.3268577 |
| H | 1.9797701  | -3.6601053 | -1.9981877 |
| C | 3.3260196  | -4.2983497 | 2.8742136  |
| H | 2.4283856  | -7.0645551 | -1.8354692 |
| C | 1.5837623  | -4.3905568 | 0.2649216  |
| C | 1.5424468  | -6.7519821 | -2.4244189 |
| H | 0.9911747  | -7.6655455 | -2.7300138 |
| H | 1.1151457  | -5.1004781 | 0.9640776  |
| C | 2.3639298  | -0.9443513 | -3.4711035 |
| H | 5.0089468  | -1.6238572 | -4.0139046 |
| H | 5.2523208  | -2.7655350 | -2.6487734 |
| C | 2.7272643  | -2.5609823 | -1.5369161 |
| C | 1.0952172  | -3.0824389 | 3.0152534  |
| C | 2.3177489  | -3.3074472 | 0.7801966  |
| H | 4.3292409  | -4.3192977 | 2.4009187  |
| H | 2.8584507  | -5.2916899 | 2.7095297  |
| C | 3.3847097  | -1.6107989 | -2.5349562 |
| C | 2.9015957  | -2.3886189 | -0.1398262 |
| C | 2.4527806  | -3.1678172 | 2.2986190  |
| H | 1.6108149  | -0.3810741 | -2.8865747 |
| H | 0.4889274  | -2.2483761 | 2.6130941  |
| H | 1.8350949  | -1.6919422 | -4.0979735 |
| H | -1.2946850 | -4.7809828 | -1.8076544 |

### 7.10.3 Pathway 14d-ma ↔ 14d-mi

TS1; COSMO

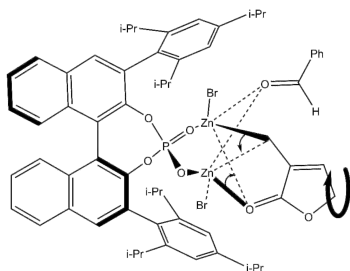

Energy (Hartree) = -11970.0227982

|   |            |            |            |
|---|------------|------------|------------|
| C | 1.0842984  | 2.1915405  | 1.6660790  |
| C | 2.4773761  | 2.2926451  | 1.5433941  |
| C | 3.0615452  | 3.6140805  | 1.5399779  |
| C | 4.4285641  | 3.8576990  | 1.2081915  |
| C | 2.2268022  | 4.7473247  | 1.8555212  |
| C | 2.8077456  | 6.0501940  | 1.9152740  |
| C | 0.8253041  | 4.5600252  | 2.0163557  |
| H | 0.1915429  | 5.4409013  | 2.1995396  |
| C | 0.2223917  | 3.3192663  | 1.8390294  |
| C | 3.6102497  | -1.2084171 | 0.4434964  |
| C | 4.8055230  | -1.3436050 | 1.1383556  |
| H | 5.3604061  | -2.2920504 | 1.0657336  |
| C | 5.2560945  | -0.3510895 | 2.0543453  |
| C | 6.4286525  | -0.5577728 | 2.8417559  |
| C | 4.4476868  | 0.8238314  | 2.2780071  |
| C | 4.8056397  | 1.6821930  | 3.3616658  |
| C | 3.3012941  | 1.0594630  | 1.4252449  |
| C | 2.9371064  | 0.0499220  | 0.5255709  |
| O | 0.4833748  | 0.9306261  | 1.6406756  |
| O | 1.8746834  | 0.2562245  | -0.3566098 |
| P | 0.3209939  | 0.2167546  | 0.1658473  |
| O | -0.4901194 | 1.0943061  | -0.8019955 |
| O | -0.1773592 | -1.2121257 | 0.4176341  |
| C | 4.1499335  | 6.2453838  | 1.6272192  |
| C | 4.9587235  | 5.1399818  | 1.2499211  |
| H | 2.1591591  | 6.9027669  | 2.1712361  |
| H | 4.5845392  | 7.2558029  | 1.6677991  |
| H | 5.0647045  | 3.0139066  | 0.9075541  |
| H | 6.0142724  | 5.3009173  | 0.9825143  |
| C | 5.9396645  | 1.4419141  | 4.1262110  |
| C | 6.7749950  | 0.3267887  | 3.8518574  |
| H | 4.1665508  | 2.5426977  | 3.5994121  |
| H | 6.1869500  | 2.1195339  | 4.9576199  |
| H | 7.6773979  | 0.1524394  | 4.4574066  |

|    |            |            |            |
|----|------------|------------|------------|
| H  | 0.4937869  | -4.0056140 | 2.8957508  |
| H  | 1.9114644  | -6.2591965 | -3.3487086 |
| H  | 3.8705187  | -0.8024331 | -1.9490473 |
| H  | 2.9775628  | -2.2164763 | 2.5088299  |
| H  | 1.8541448  | -3.8004245 | -3.0845032 |
| Zn | -2.3798571 | 0.4848790  | -1.0905526 |
| Br | -3.6700516 | 1.4367437  | -2.8360280 |
| Zn | -1.7437024 | -2.3085814 | -0.0816704 |
| Br | -2.0541764 | -4.1785614 | 1.2973831  |
| H  | -3.6824850 | 3.9895244  | -0.6299025 |
| C  | -1.8248500 | -3.7398001 | -5.7239431 |
| C  | -1.7776028 | -2.9283604 | -4.5861979 |
| C  | -1.1457071 | -1.6638326 | -4.6578852 |
| C  | -0.5819358 | -1.2159605 | -5.8758671 |
| C  | -0.6190086 | -2.0405641 | -7.0056406 |
| C  | -1.2395787 | -3.3013049 | -6.9275323 |
| H  | -2.3192317 | -4.7217268 | -5.6767565 |
| C  | -1.0937476 | -0.7926390 | -3.4876641 |
| H  | -0.1065824 | -0.2231389 | -5.9209080 |
| H  | -0.1707570 | -1.7032492 | -7.9520636 |
| H  | -1.2749581 | -3.9470981 | -7.8186541 |
| O  | -1.3766236 | -1.1538121 | -2.3321280 |
| H  | -2.2409377 | -3.2391908 | -3.6380682 |
| H  | -0.7987660 | 0.2719072  | -3.6708504 |
| C  | -5.8766958 | -0.7699755 | -0.8751211 |
| C  | -4.6166641 | -1.1626784 | -0.5422780 |
| C  | -4.3154404 | -2.3194282 | -1.4076192 |
| O  | -5.3580624 | -2.6304830 | -2.1914638 |
| C  | -6.4021026 | -1.6610508 | -1.9519500 |
| O  | -3.2405286 | -2.9374021 | -1.4761026 |
| C  | -3.5282602 | -0.5930755 | 0.2726372  |
| H  | -7.3343678 | -2.2052866 | -1.6863911 |
| H  | -6.5768627 | -1.1147223 | -2.9056105 |
| H  | -3.1992004 | -1.3131195 | 1.0637817  |
| H  | -3.8414663 | 0.2879368  | 0.8674400  |
| H  | -6.4315791 | 0.0906912  | -0.4810660 |

## TS1

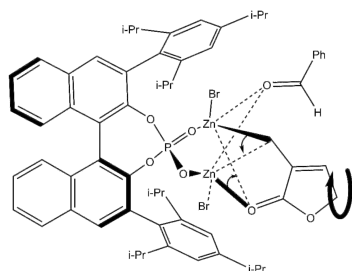

Energy (Hartree) = -11970.0101431  
number of imaginary frequencies: 1

|   |           |            |           |
|---|-----------|------------|-----------|
| C | 1.0852811 | 2.1900091  | 1.6638266 |
| C | 2.4779967 | 2.2925908  | 1.5384994 |
| C | 3.0607139 | 3.6143801  | 1.5302126 |
| C | 4.4269290 | 3.8580133  | 1.1960959 |
| C | 2.2257805 | 4.7476643  | 1.8442098 |
| C | 2.8062161 | 6.0505974  | 1.8992329 |
| C | 0.8251312 | 4.5589980  | 2.0087386 |
| H | 0.1904736 | 5.4394530  | 2.1907717 |
| C | 0.2228627 | 3.3174474  | 1.8362441 |
| C | 3.6063879 | -1.2106480 | 0.4438158 |
| C | 4.8015056 | -1.3462273 | 1.1385110 |
| H | 5.3534336 | -2.2965829 | 1.0684219 |
| C | 5.2555314 | -0.3520816 | 2.0507699 |
| C | 6.4286329 | -0.5577443 | 2.8369733 |
| C | 4.4497131 | 0.8249392  | 2.2720017 |
| C | 4.8112179 | 1.6861052  | 3.3519604 |
| C | 3.3024675 | 1.0599285  | 1.4205781 |

|   |            |            |            |
|---|------------|------------|------------|
| C | 2.9361188  | 0.0493554  | 0.5231005  |
| O | 0.4857058  | 0.9289256  | 1.6412400  |
| O | 1.8736655  | 0.2552213  | -0.3585593 |
| P | 0.3211058  | 0.2146632  | 0.1666847  |
| O | -0.4948845 | 1.0935038  | -0.7966007 |
| O | -0.1722942 | -1.2160247 | 0.4175373  |
| C | 4.1473604  | 6.2460279  | 1.6086184  |
| C | 4.9561194  | 5.1404391  | 1.2334881  |
| H | 2.1574393  | 6.9034545  | 2.1537441  |
| H | 4.5811740  | 7.2568906  | 1.6456223  |
| H | 5.0628064  | 3.0134077  | 0.8974377  |
| H | 6.0111833  | 5.3012717  | 0.9642918  |
| C | 5.9459770  | 1.4464755  | 4.1149708  |
| C | 6.7784988  | 0.3292659  | 3.8430937  |
| H | 4.1740223  | 2.5485097  | 3.5875834  |
| H | 6.1960250  | 2.1266182  | 4.9434330  |
| H | 7.6816701  | 0.1552555  | 4.4475322  |
| H | 7.0371440  | -1.4551779 | 2.6439011  |
| C | -1.8527266 | 3.7551578  | 0.4941746  |
| C | -1.2576556 | 3.1857859  | 1.6639955  |
| C | -3.2312255 | 3.5777753  | 0.2903887  |
| C | -2.0611435 | 2.4754819  | 2.5923022  |
| C | -3.4496809 | 2.3787286  | 2.3648182  |
| C | -4.0572288 | 2.9119409  | 1.2170142  |
| C | -1.4777546 | 1.8324718  | 3.8481344  |
| H | -4.0630296 | 1.8508978  | 3.1096589  |
| C | -1.7729594 | 0.3222105  | 3.9079517  |
| H | -2.8588736 | 0.1200017  | 4.0192949  |
| H | -1.2608126 | -0.1433211 | 4.7746957  |
| H | -1.4195992 | -0.1931135 | 2.9938641  |
| C | -1.9616401 | 2.5557811  | 5.1185307  |
| H | -0.3764258 | 1.9522590  | 3.8069414  |
| H | -3.0626666 | 2.4759208  | 5.2363485  |
| H | -1.7051843 | 3.6341339  | 5.0896763  |
| H | -1.4953857 | 2.1145724  | 6.0235915  |
| C | -5.5526888 | 2.8054109  | 0.9296599  |
| C | -6.3063389 | 1.8363829  | 1.8490727  |
| H | -7.3586121 | 1.7253869  | 1.5165662  |
| H | -6.3346960 | 2.2077874  | 2.8947682  |
| H | -5.8485024 | 0.8265837  | 1.8673504  |
| C | -6.2169652 | 4.1964927  | 0.9598140  |
| H | -5.6278737 | 2.4227288  | -0.1155839 |
| H | -7.2885956 | 4.1309863  | 0.6792233  |
| H | -5.7253620 | 4.9016572  | 0.2611959  |
| H | -6.1548396 | 4.6344849  | 1.9779031  |
| C | -1.0640057 | 4.5813499  | -0.5251935 |
| C | -1.2505673 | 4.1239602  | -1.9800836 |
| H | -0.6335113 | 4.7543468  | -2.6532346 |
| H | -2.3019497 | 4.2006678  | -2.3227398 |
| H | -0.9367272 | 3.0711844  | -2.1056047 |
| C | -1.4119563 | 6.0759411  | -0.3729903 |
| H | 0.0126645  | 4.4655140  | -0.2952377 |
| H | -0.7897807 | 6.6954678  | -1.0516857 |
| H | -1.2519905 | 6.4362642  | 0.6635514  |
| H | -2.4769121 | 6.2627041  | -0.6251905 |
| H | 0.2664009  | -6.3513073 | -0.7018517 |
| H | 4.0714353  | -3.1675536 | -3.9352050 |
| H | 3.4485549  | -4.1756800 | 3.9726987  |
| C | 0.6181766  | -5.8061044 | -1.6042091 |
| H | 2.8681631  | -0.2387127 | -4.1568357 |
| H | -1.1956003 | -6.3039958 | -2.7322313 |
| H | 1.2449427  | -2.9001464 | 4.1070361  |
| C | 1.3901156  | -4.5908044 | -1.1051561 |
| C | 4.4879727  | -2.3406689 | -3.3224969 |
| C | -0.6265197 | -5.4070678 | -2.4098505 |
| H | -0.3450737 | -4.8446005 | -3.3234409 |
| C | 1.9679375  | -3.6616999 | -1.9920886 |
| C | 3.3082586  | -4.3041595 | 2.8793184  |
| H | 2.4096605  | -7.0664296 | -1.8148234 |
| C | 1.5701224  | -4.3867646 | 0.2719536  |
| C | 1.5260578  | -6.7547891 | -2.4074769 |

|    |            |            |            |
|----|------------|------------|------------|
| H  | 0.9742584  | -7.6686442 | -2.7112809 |
| H  | 1.0982499  | -5.0931296 | 0.9723377  |
| C  | 2.3636666  | -0.9502000 | -3.4703052 |
| H  | 5.0071591  | -1.6403100 | -4.0095549 |
| H  | 5.2447754  | -2.7794077 | -2.6413750 |
| C  | 2.7195004  | -2.5647912 | -1.5328528 |
| C  | 1.0888091  | -3.0674036 | 3.0209851  |
| C  | 2.3084435  | -3.3059579 | 0.7854460  |
| H  | 4.3110594  | -4.3347982 | 2.4057164  |
| H  | 2.8319510  | -5.2932940 | 2.7154179  |
| C  | 3.3810585  | -1.6187141 | -2.5321255 |
| C  | 2.8946370  | -2.3905055 | -0.1362968 |
| C  | 2.4452886  | -3.1658748 | 2.3036545  |
| H  | 1.6121826  | -0.3835289 | -2.8868578 |
| H  | 0.4906766  | -2.2273311 | 2.6196831  |
| H  | 1.8330161  | -1.6969329 | -4.0967396 |
| H  | -1.3101077 | -4.7777841 | -1.8057868 |
| H  | 0.4776386  | -3.9841268 | 2.9020382  |
| H  | 1.8992010  | -6.2665343 | -3.3324600 |
| H  | 3.8687750  | -0.8108960 | -1.9470830 |
| H  | 2.9793134  | -2.2194939 | 2.5129568  |
| H  | 1.8420608  | -3.8038597 | -3.0782106 |
| Zn | -2.3847066 | 0.4811013  | -1.0803078 |
| Br | -3.6879292 | 1.4302750  | -2.8148285 |
| Zn | -1.7359585 | -2.3183076 | -0.0787258 |
| Br | -2.0492152 | -4.1913255 | 1.2902292  |
| H  | -3.6848138 | 3.9755783  | -0.6305877 |
| C  | -1.7875960 | -3.7176409 | -5.7365872 |
| C  | -1.7544711 | -2.9081917 | -4.5968599 |
| C  | -1.1362861 | -1.6372646 | -4.6634019 |
| C  | -0.5726318 | -1.1810495 | -5.8775503 |
| C  | -0.5953566 | -2.0034196 | -7.0091398 |
| C  | -1.2020344 | -3.2708230 | -6.9363658 |
| H  | -2.2709673 | -4.7051895 | -5.6929460 |
| C  | -1.0971157 | -0.7704015 | -3.4879223 |
| H  | -0.1072744 | -0.1832922 | -5.9177828 |
| H  | -0.1465825 | -1.6592634 | -7.9528794 |
| H  | -1.2262605 | -3.9152284 | -7.8289096 |
| O  | -1.3767946 | -1.1440015 | -2.3373549 |
| H  | -2.2179232 | -3.2257793 | -3.6508352 |
| H  | -0.8161901 | 0.2995426  | -3.6634522 |
| C  | -5.8694382 | -0.7775002 | -0.8640453 |
| C  | -4.6099774 | -1.1736745 | -0.5350168 |
| C  | -4.3053083 | -2.3177467 | -1.4183734 |
| O  | -5.3480024 | -2.6175521 | -2.2088930 |
| C  | -6.3911095 | -1.6530114 | -1.9563381 |
| O  | -3.2300156 | -2.9296947 | -1.4972002 |
| C  | -3.5228792 | -0.6110891 | 0.2851856  |
| H  | -7.3246017 | -2.2016765 | -1.7025099 |
| H  | -6.5623998 | -1.0911371 | -2.9019470 |
| H  | -3.1944719 | -1.3369164 | 1.0711812  |
| H  | -3.8366501 | 0.2665196  | 0.8847941  |
| H  | -6.4249223 | 0.0768720  | -0.4575879 |
